# Supplementary material for: Identification of Novel lncRNA and Differentially Expressed Genes (DEGs) of Testicular Tissues among Cattle, Yak, and Cattle-Yak Associated with Male Infertility
Source: MDPI journal article supplement (doi:10.3390/ani11082420), 2021-08-17
Supplement: s1 [file s1]

| Transcript    | index     | score       | start | end  | length |
|---------------|-----------|-------------|-------|------|--------|
| MSTRG. 12. 1  | noncoding | -0. 0274432 | 180   | 375  | 2283   |
| MSTRG. 12. 2  | noncoding | -0. 1024    | 87    | 165  | 676    |
| MSTRG. 12. 3  | noncoding | -0. 0274432 | 180   | 375  | 1262   |
| MSTRG. 32. 2  | coding    | 0. 388      | 0     | 399  | 4334   |
| MSTRG. 33. 1  | noncoding | -0. 065536  | 12    | 78   | 420    |
| MSTRG. 34. 2  | coding    | 0. 131      | 204   | 777  | 1149   |
| MSTRG. 35. 1  | noncoding | -0. 0729088 | 69    | 282  | 867    |
| MSTRG. 39. 3  | noncoding | -0. 045056  | 486   | 558  | 1065   |
| MSTRG. 39. 6  | coding    | 0. 35       | 0     | 1419 | 10401  |
| MSTRG. 59. 3  | noncoding | -0. 0897024 | 942   | 1347 | 1764   |
| MSTRG. 60. 1  | noncoding | -0. 012288  | 1746  | 1884 | 2252   |
| MSTRG. 61. 1  | noncoding | -0. 016384  | 516   | 603  | 1132   |
| MSTRG. 60. 2  | noncoding | -0. 045056  | 357   | 474  | 4486   |
| MSTRG. 63. 2  | coding    | 0. 117      | 1434  | 3267 | 4052   |
| MSTRG. 63. 4  | coding    | 0. 111      | 1431  | 3204 | 3991   |
| MSTRG. 63. 6  | noncoding | -0. 0954368 | 1851  | 2610 | 6056   |
| MSTRG. 63. 7  | noncoding | -0. 069632  | 1434  | 2496 | 3748   |
| MSTRG. 63. 5  | coding    | 0. 08       | 1563  | 3210 | 3494   |
| MSTRG. 63. 8  | coding    | 0. 111      | 1851  | 3624 | 3902   |
| MSTRG. 63. 3  | coding    | 0. 117      | 1851  | 3684 | 4087   |
| MSTRG. 65. 10 | coding    | 0. 127      | 0     | 6756 | 8160   |
| MSTRG. 65. 11 | coding    | 0. 127      | 0     | 6795 | 8199   |
| MSTRG. 65. 4  | coding    | 0. 126      | 0     | 6675 | 8008   |
| MSTRG. 65. 5  | coding    | 0. 127      | 0     | 6807 | 8193   |
| MSTRG. 65. 6  | coding    | 0. 125      | 0     | 6696 | 8029   |
| MSTRG. 65. 8  | coding    | 0. 127      | 0     | 6807 | 8140   |
| MSTRG. 65. 9  | coding    | 0. 127      | 0     | 6786 | 8190   |
| MSTRG. 65. 14 | coding    | 0. 148      | 0     | 5412 | 7836   |
| MSTRG. 65. 15 | coding    | 0. 148      | 0     | 5382 | 7806   |
| MSTRG. 65. 16 | coding    | 0. 148      | 0     | 5412 | 7815   |
| MSTRG. 66. 1  | coding    | 0. 131      | 402   | 3387 | 4138   |
| MSTRG. 66. 2  | coding    | 0. 133      | 348   | 3354 | 4105   |
| MSTRG. 66. 3  | coding    | 0. 134      | 282   | 3291 | 4040   |
| MSTRG. 66. 4  | coding    | 0. 132      | 246   | 3246 | 3995   |
| MSTRG. 68. 2  | coding    | 0. 061      | 594   | 1407 | 3679   |
| MSTRG. 42. 1  | noncoding | -0. 0438272 | 1638  | 2070 | 5454   |
| MSTRG. 56. 2  | coding    | 0. 258      | 96    | 1785 | 4773   |
| MSTRG. 56. 4  | coding    | 0. 26       | 60    | 1758 | 4711   |
| MSTRG. 56. 6  | coding    | 0. 326      | 36    | 1437 | 7508   |
| MSTRG. 56. 7  | coding    | 0. 259      | 6     | 1698 | 2812   |
| MSTRG. 56. 8  | coding    | 0. 258      | 6     | 1692 | 2870   |
| MSTRG. 52. 1  | coding    | 0. 096      | 285   | 4803 | 7093   |
| MSTRG. 52. 2  | coding    | 0. 103      | 0     | 4695 | 6984   |
| MSTRG. 53. 1  | coding    | 0. 229      | 0     | 1209 | 1555   |
| MSTRG. 53. 2  | coding    | 0. 288      | 954   | 1389 | 1632   |
| MSTRG. 70. 1  | coding    | 0. 278      | 96    | 1002 | 3716   |
| MSTRG. 73. 2  | coding    | 0. 127      | 0     | 3639 | 3795   |
| MSTRG. 78. 1  | noncoding | -0. 0053248 | 7014  | 7161 | 7956   |
| MSTRG. 79. 2  | noncoding | -0. 0749568 | 0     | 198  | 2529   |
| MSTRG. 78. 2  | coding    | 0. 105      | 1482  | 1743 | 8273   |
| MSTRG. 80. 1  | noncoding | -0. 008192  | 69    | 174  | 328    |
| MSTRG. 81. 1  | coding    | 0. 048      | 606   | 687  | 1462   |
| MSTRG. 79. 3  | noncoding | -0. 0253952 | 987   | 1155 | 9939   |

|               |           |             |       |       |       |
|---------------|-----------|-------------|-------|-------|-------|
| MSTRG. 82. 1  | noncoding | -0. 057344  | 141   | 156   | 446   |
| MSTRG. 79. 4  | noncoding | -0. 0442368 | 414   | 588   | 3123  |
| MSTRG. 79. 5  | noncoding | -0. 0503808 | 5457  | 5613  | 6284  |
| MSTRG. 79. 6  | noncoding | -0. 036864  | 2301  | 2403  | 3198  |
| MSTRG. 83. 1  | coding    | 0. 096      | 870   | 1233  | 3477  |
| MSTRG. 79. 7  | noncoding | -0. 014336  | 228   | 432   | 9751  |
| MSTRG. 85. 1  | noncoding | -0. 028672  | 441   | 531   | 1564  |
| MSTRG. 86. 1  | noncoding | -0. 057344  | 2067  | 2172  | 6606  |
| MSTRG. 96. 9  | coding    | 0. 136      | 909   | 2250  | 3025  |
| MSTRG. 96. 10 | coding    | 0. 136      | 1071  | 2412  | 3187  |
| MSTRG. 96. 6  | coding    | 0. 136      | 2091  | 3432  | 4207  |
| MSTRG. 96. 8  | coding    | 0. 136      | 1305  | 2646  | 3423  |
| MSTRG. 96. 3  | coding    | 0. 136      | 1428  | 2769  | 3545  |
| MSTRG. 97. 1  | noncoding | -0. 0339968 | 477   | 663   | 2424  |
| MSTRG. 97. 2  | coding    | 0. 082      | 381   | 1155  | 2332  |
| MSTRG. 91. 1  | noncoding | -0. 0004096 | 609   | 747   | 1940  |
| MSTRG. 103. 6 | coding    | 0. 052      | 183   | 1533  | 3212  |
| MSTRG. 103. 2 | coding    | 0. 068      | 0     | 1587  | 7991  |
| MSTRG. 103. 5 | coding    | 0. 055      | 183   | 1608  | 7127  |
| MSTRG. 103. 4 | coding    | 0. 329      | 5031  | 5376  | 5797  |
| MSTRG. 104. 1 | coding    | 0. 211      | 0     | 351   | 1278  |
| MSTRG. 104. 3 | coding    | 0. 211      | 0     | 351   | 822   |
| MSTRG. 111. 1 | noncoding | -0. 2048    | 267   | 306   | 462   |
| MSTRG. 117. 6 | coding    | 0. 086      | 0     | 1530  | 1795  |
| MSTRG. 118. 5 | coding    | 0. 079      | 24    | 243   | 509   |
| MSTRG. 123. 1 | noncoding | -0. 0335872 | 0     | 45    | 386   |
| MSTRG. 127. 1 | noncoding | -0. 0004096 | 453   | 453   | 672   |
| MSTRG. 131. 1 | noncoding | -0. 008192  | 0     | 51    | 226   |
| MSTRG. 132. 1 | noncoding | -0. 073728  | 0     | 57    | 2022  |
| MSTRG. 134. 1 | noncoding | -0. 04096   | 114   | 141   | 408   |
| MSTRG. 151. 1 | noncoding | -0. 057344  | 2358  | 2391  | 2839  |
| MSTRG. 188. 1 | coding    | 0. 069      | 14730 | 15276 | 18614 |
| MSTRG. 189. 1 | noncoding | -0. 028672  | 1506  | 1608  | 3356  |
| MSTRG. 193. 1 | noncoding | -0. 06144   | 312   | 405   | 669   |
| MSTRG. 196. 1 | coding    | 0. 083      | 636   | 864   | 1087  |
| MSTRG. 223. 1 | noncoding | -0. 0118784 | 0     | 96    | 670   |
| MSTRG. 241. 1 | coding    | 0. 125      | 1092  | 1389  | 1743  |
| MSTRG. 158. 1 | coding    | 0. 178      | 0     | 1368  | 9706  |
| MSTRG. 158. 6 | coding    | 0. 065      | 42    | 1095  | 3741  |
| MSTRG. 158. 5 | coding    | 0. 08       | 0     | 1065  | 3712  |
| MSTRG. 158. 4 | coding    | 0. 164      | 0     | 1452  | 3958  |
| MSTRG. 158. 8 | coding    | 0. 037      | 120   | 3204  | 3405  |
| MSTRG. 158. 7 | coding    | 0. 199      | 0     | 1281  | 3554  |
| MSTRG. 158. 9 | coding    | 0. 126      | 87    | 351   | 4805  |
| MSTRG. 160. 1 | noncoding | -0. 141312  | 0     | 54    | 1441  |
| MSTRG. 160. 3 | coding    | 0. 113      | 996   | 4215  | 7489  |
| MSTRG. 160. 4 | coding    | 0. 113      | 924   | 4143  | 7684  |
| MSTRG. 160. 5 | coding    | 0. 113      | 936   | 4155  | 6419  |
| MSTRG. 160. 6 | coding    | 0. 113      | 1659  | 4878  | 7735  |
| MSTRG. 161. 1 | noncoding | -0. 0126976 | 309   | 318   | 806   |
| MSTRG. 162. 1 | noncoding | -0. 014336  | 6939  | 7068  | 11244 |
| MSTRG. 162. 2 | noncoding | -0. 014336  | 924   | 1053  | 4935  |
| MSTRG. 160. 7 | noncoding | -0. 090112  | 144   | 216   | 1232  |
| MSTRG. 163. 1 | coding    | 0. 102      | 417   | 1638  | 2378  |

|                |           |             |       |       |       |
|----------------|-----------|-------------|-------|-------|-------|
| MSTRG. 163. 3  | coding    | 0. 112      | 411   | 1500  | 4264  |
| MSTRG. 164. 1  | coding    | 0. 096      | 135   | 741   | 948   |
| MSTRG. 166. 2  | coding    | 0. 01       | 387   | 627   | 1809  |
| MSTRG. 168. 2  | coding    | 0. 22       | 0     | 243   | 518   |
| MSTRG. 169. 1  | noncoding | -0. 024576  | 27    | 156   | 333   |
| MSTRG. 175. 3  | coding    | 0. 125      | 684   | 4800  | 5067  |
| MSTRG. 175. 4  | noncoding | -0. 1339392 | 2361  | 2376  | 3094  |
| MSTRG. 175. 5  | coding    | 0. 111      | 132   | 3807  | 3963  |
| MSTRG. 175. 6  | coding    | 0. 1        | 210   | 3024  | 3343  |
| MSTRG. 265. 8  | noncoding | -0. 0167936 | 4050  | 4377  | 4630  |
| MSTRG. 265. 9  | coding    | 0. 144      | 15942 | 16527 | 16818 |
| MSTRG. 266. 1  | noncoding | -0. 032768  | 1335  | 1395  | 1593  |
| MSTRG. 267. 1  | coding    | 0. 051      | 4101  | 5100  | 7874  |
| MSTRG. 268. 1  | noncoding | -0. 02048   | 1059  | 1140  | 5779  |
| MSTRG. 269. 1  | noncoding | -0. 43008   | 1149  | 1167  | 1804  |
| MSTRG. 268. 2  | noncoding | -0. 02048   | 1059  | 1140  | 2022  |
| MSTRG. 270. 1  | noncoding | -0. 024576  | 435   | 531   | 5102  |
| MSTRG. 271. 1  | noncoding | -0. 032768  | 3642  | 3651  | 4432  |
| MSTRG. 272. 1  | noncoding | -0. 126976  | 1494  | 1557  | 10685 |
| MSTRG. 273. 1  | noncoding | -0. 094208  | 1518  | 1590  | 3854  |
| MSTRG. 274. 1  | noncoding | -0. 196608  | 231   | 237   | 4757  |
| MSTRG. 275. 1  | noncoding | -0. 049152  | 831   | 930   | 2568  |
| MSTRG. 276. 1  | noncoding | -0. 008192  | 243   | 321   | 2355  |
| MSTRG. 277. 1  | noncoding | -0. 032768  | 3078  | 3204  | 6352  |
| MSTRG. 277. 2  | noncoding | -0. 0008192 | 1017  | 1164  | 4614  |
| MSTRG. 278. 1  | coding    | 0. 146      | 2712  | 2988  | 15264 |
| MSTRG. 265. 10 | noncoding | -0. 0065536 | 3369  | 3483  | 5365  |
| MSTRG. 265. 11 | coding    | 0. 092      | 6969  | 7191  | 15534 |
| MSTRG. 279. 1  | coding    | 0. 124      | 13302 | 13479 | 13704 |
| MSTRG. 265. 12 | noncoding | -0. 028672  | 5052  | 5154  | 10450 |
| MSTRG. 280. 1  | noncoding | -0. 0004096 | 1044  | 1152  | 5462  |
| MSTRG. 281. 1  | noncoding | -0. 06144   | 1539  | 1647  | 14521 |
| MSTRG. 282. 1  | noncoding | -0. 0016384 | 3396  | 3519  | 7437  |
| MSTRG. 283. 1  | noncoding | -0. 032768  | 4446  | 4467  | 5415  |
| MSTRG. 284. 1  | noncoding | -0. 045056  | 717   | 807   | 6419  |
| MSTRG. 284. 2  | noncoding | -0. 045056  | 642   | 732   | 4997  |
| MSTRG. 265. 14 | noncoding | -0. 036864  | 2187  | 2325  | 31168 |
| MSTRG. 285. 1  | noncoding | -0. 0004096 | 726   | 738   | 6274  |
| MSTRG. 250. 1  | noncoding | -0. 0139264 | 762   | 975   | 3949  |
| MSTRG. 255. 1  | coding    | 0. 074      | 1404  | 1632  | 3932  |
| MSTRG. 258. 1  | noncoding | -0. 024576  | 1815  | 1923  | 7201  |
| MSTRG. 261. 1  | noncoding | -0. 0147456 | 180   | 414   | 1785  |
| MSTRG. 262. 1  | noncoding | -0. 012288  | 2616  | 2715  | 4299  |
| MSTRG. 263. 1  | noncoding | -0. 1245184 | 1764  | 1770  | 2450  |
| MSTRG. 297. 1  | noncoding | -0. 002048  | 615   | 729   | 987   |
| MSTRG. 307. 1  | coding    | 0. 24       | 0     | 1239  | 11283 |
| MSTRG. 308. 1  | noncoding | -0. 036864  | 144   | 201   | 3366  |
| MSTRG. 312. 1  | noncoding | -0. 053248  | 417   | 498   | 900   |
| MSTRG. 314. 1  | noncoding | -0. 0495616 | 1137  | 2031  | 2186  |
| MSTRG. 314. 3  | coding    | 0. 168      | 1419  | 1800  | 5604  |
| MSTRG. 325. 3  | coding    | 0. 127      | 27    | 2019  | 2349  |
| MSTRG. 325. 4  | coding    | 0. 128      | 27    | 2022  | 2546  |
| MSTRG. 326. 1  | noncoding | -0. 053248  | 3762  | 3840  | 4429  |
| MSTRG. 327. 1  | coding    | 0. 058      | 330   | 534   | 5165  |

|               |           |             |      |      |       |
|---------------|-----------|-------------|------|------|-------|
| MSTRG. 324. 1 | noncoding | -0. 0167936 | 87   | 132  | 377   |
| MSTRG. 328. 1 | noncoding | -0. 032768  | 375  | 399  | 1297  |
| MSTRG. 328. 2 | noncoding | -0. 049152  | 3363 | 3477 | 4067  |
| MSTRG. 332. 1 | coding    | 0. 156      | 276  | 555  | 5526  |
| MSTRG. 348. 1 | noncoding | -0. 0004096 | 123  | 123  | 277   |
| MSTRG. 351. 1 | coding    | 0. 132      | 150  | 1530 | 2447  |
| MSTRG. 352. 1 | noncoding | -0. 0004096 | 4071 | 4161 | 6301  |
| MSTRG. 353. 1 | noncoding | -0. 057344  | 75   | 141  | 1004  |
| MSTRG. 356. 1 | noncoding | -0. 0094208 | 3    | 336  | 1752  |
| MSTRG. 361. 1 | noncoding | -0. 0004096 | 0    | 0    | 224   |
| MSTRG. 375. 2 | coding    | 0. 072      | 1230 | 9657 | 11388 |
| MSTRG. 375. 5 | coding    | 0. 064      | 897  | 8874 | 10605 |
| MSTRG. 377. 1 | noncoding | -0. 08192   | 165  | 228  | 1084  |
| MSTRG. 377. 2 | noncoding | -0. 02048   | 402  | 510  | 1407  |
| MSTRG. 379. 3 | coding    | 0. 246      | 87   | 1434 | 1947  |
| MSTRG. 379. 5 | coding    | 0. 25       | 33   | 1347 | 1795  |
| MSTRG. 369. 1 | noncoding | -0. 016384  | 399  | 408  | 921   |
| MSTRG. 370. 1 | noncoding | -0. 118784  | 57   | 60   | 213   |
| MSTRG. 371. 1 | coding    | 0. 05       | 42   | 813  | 1977  |
| MSTRG. 381. 3 | coding    | 0. 127      | 0    | 2463 | 5793  |
| MSTRG. 396. 1 | coding    | 0. 157      | 4092 | 6756 | 7683  |
| MSTRG. 397. 1 | noncoding | -0. 0077824 | 5460 | 5577 | 11618 |
| MSTRG. 396. 3 | coding    | 0. 157      | 864  | 3558 | 4020  |
| MSTRG. 398. 1 | noncoding | -0. 036864  | 4266 | 4347 | 7300  |
| MSTRG. 399. 1 | noncoding | -0. 028672  | 2232 | 2337 | 4279  |
| MSTRG. 400. 1 | noncoding | -0. 0094208 | 3039 | 3144 | 5086  |
| MSTRG. 401. 1 | noncoding | -0. 0004096 | 786  | 852  | 3548  |
| MSTRG. 404. 3 | coding    | 0. 138      | 858  | 1827 | 3800  |
| MSTRG. 404. 4 | coding    | 0. 119      | 606  | 1254 | 2391  |
| MSTRG. 404. 6 | coding    | 0. 15       | 372  | 1245 | 3203  |
| MSTRG. 404. 5 | coding    | 0. 15       | 900  | 1509 | 3481  |
| MSTRG. 404. 7 | coding    | 0. 164      | 360  | 1188 | 3160  |
| MSTRG. 404. 8 | noncoding | -0. 0004096 | 609  | 750  | 3547  |
| MSTRG. 391. 3 | coding    | 0. 124      | 0    | 1929 | 2350  |
| MSTRG. 392. 2 | noncoding | -0. 049152  | 177  | 339  | 2025  |
| MSTRG. 393. 2 | noncoding | -0. 053248  | 336  | 339  | 822   |
| MSTRG. 405. 1 | coding    | 0. 116      | 162  | 1269 | 1840  |
| MSTRG. 405. 7 | coding    | 0. 104      | 18   | 1746 | 2317  |
| MSTRG. 405. 3 | coding    | 0. 142      | 0    | 1356 | 1940  |
| MSTRG. 405. 4 | coding    | 0. 104      | 18   | 1749 | 2331  |
| MSTRG. 405. 5 | coding    | 0. 142      | 0    | 1353 | 1937  |
| MSTRG. 405. 6 | coding    | 0. 143      | 0    | 1365 | 1949  |
| MSTRG. 405. 8 | coding    | 0. 112      | 138  | 1338 | 1920  |
| MSTRG. 405. 9 | noncoding | -0. 12288   | 615  | 705  | 1719  |
| MSTRG. 407. 1 | coding    | 0. 071      | 81   | 1242 | 1465  |
| MSTRG. 416. 1 | noncoding | -0. 0180224 | 207  | 366  | 916   |
| MSTRG. 423. 2 | coding    | 0. 097      | 0    | 309  | 2210  |
| MSTRG. 424. 1 | coding    | 0. 182      | 84   | 2028 | 7023  |
| MSTRG. 424. 2 | coding    | 0. 182      | 471  | 2415 | 6720  |
| MSTRG. 424. 3 | coding    | 0. 119      | 1266 | 2310 | 6242  |
| MSTRG. 426. 1 | coding    | 0. 093      | 735  | 1254 | 5075  |
| MSTRG. 427. 1 | noncoding | -0. 0688128 | 4587 | 5211 | 5367  |
| MSTRG. 429. 1 | coding    | 0. 077      | 135  | 2538 | 3857  |
| MSTRG. 429. 2 | coding    | 0. 075      | 0    | 2583 | 3432  |



|                |           |             |       |       |       |
|----------------|-----------|-------------|-------|-------|-------|
| MSTRG. 449. 1  | noncoding | -0. 0004096 | 0     | 0     | 301   |
| MSTRG. 451. 1  | coding    | 0. 054      | 7182  | 8157  | 16139 |
| MSTRG. 451. 2  | coding    | 0. 11       | 2217  | 2442  | 4912  |
| MSTRG. 452. 1  | noncoding | -0. 0053248 | 630   | 906   | 1063  |
| MSTRG. 457. 1  | noncoding | -0. 1024    | 12123 | 12222 | 13686 |
| MSTRG. 435. 3  | noncoding | -0. 0159744 | 972   | 1266  | 1434  |
| MSTRG. 439. 1  | noncoding | -0. 0454656 | 1224  | 1302  | 1614  |
| MSTRG. 438. 2  | noncoding | -0. 0049152 | 1341  | 1446  | 3811  |
| MSTRG. 440. 1  | noncoding | -0. 006144  | 1725  | 1815  | 8222  |
| MSTRG. 441. 1  | coding    | 0. 147      | 2880  | 3120  | 5551  |
| MSTRG. 467. 6  | noncoding | -0. 014336  | 7716  | 7809  | 8476  |
| MSTRG. 467. 7  | noncoding | -0. 02048   | 579   | 639   | 795   |
| MSTRG. 468. 1  | noncoding | -0. 0790528 | 3918  | 4107  | 28602 |
| MSTRG. 468. 2  | noncoding | -0. 0774144 | 12954 | 13305 | 21333 |
| MSTRG. 468. 3  | noncoding | -0. 032768  | 357   | 432   | 4826  |
| MSTRG. 468. 4  | noncoding | -0. 065536  | 1665  | 1734  | 2649  |
| MSTRG. 468. 5  | coding    | 0. 039      | 6279  | 6945  | 9859  |
| MSTRG. 470. 1  | noncoding | -0. 0004096 | 0     | 0     | 1555  |
| MSTRG. 467. 10 | coding    | 0. 151      | 3192  | 5808  | 8230  |
| MSTRG. 467. 9  | coding    | 0. 151      | 3069  | 5778  | 8202  |
| MSTRG. 467. 11 | coding    | 0. 153      | 1068  | 3192  | 8946  |
| MSTRG. 471. 1  | noncoding | -0. 028672  | 1890  | 1983  | 2752  |
| MSTRG. 472. 1  | noncoding | -0. 167936  | 5799  | 5853  | 6260  |
| MSTRG. 463. 1  | coding    | 0. 174      | 0     | 522   | 4928  |
| MSTRG. 463. 4  | coding    | 0. 109      | 0     | 423   | 2748  |
| MSTRG. 464. 1  | noncoding | -0. 1024    | 648   | 723   | 2608  |
| MSTRG. 474. 1  | noncoding | -0. 004096  | 1188  | 1386  | 1811  |
| MSTRG. 479. 1  | coding    | 0. 419      | 0     | 1071  | 1304  |
| MSTRG. 481. 2  | noncoding | -0. 0004096 | 0     | 3     | 533   |
| MSTRG. 481. 1  | noncoding | -0. 0724992 | 282   | 348   | 513   |
| MSTRG. 487. 2  | coding    | 0. 079      | 1968  | 2802  | 3659  |
| MSTRG. 488. 3  | coding    | 0. 042      | 246   | 999   | 2220  |
| MSTRG. 484. 1  | noncoding | -0. 0004096 | 0     | 0     | 310   |
| MSTRG. 493. 1  | noncoding | -0. 012288  | 297   | 330   | 884   |
| MSTRG. 497. 1  | noncoding | -0. 028672  | 54    | 129   | 311   |
| MSTRG. 506. 1  | noncoding | -0. 0012288 | 267   | 399   | 872   |
| MSTRG. 508. 3  | noncoding | -0. 0966656 | 0     | 714   | 3919  |
| MSTRG. 508. 4  | noncoding | -0. 0966656 | 0     | 714   | 4202  |
| MSTRG. 508. 2  | noncoding | -0. 1466368 | 0     | 339   | 2701  |
| MSTRG. 508. 5  | noncoding | -0. 1384448 | 0     | 324   | 10720 |
| MSTRG. 509. 1  | noncoding | -0. 0008192 | 726   | 936   | 1125  |
| MSTRG. 512. 2  | noncoding | -0. 135168  | 399   | 444   | 761   |
| MSTRG. 513. 4  | coding    | 0. 205      | 0     | 3207  | 6094  |
| MSTRG. 514. 4  | noncoding | -0. 0106496 | 2913  | 3084  | 3432  |
| MSTRG. 514. 3  | noncoding | -0. 0106496 | 3420  | 3591  | 3938  |
| MSTRG. 514. 5  | noncoding | -0. 0106496 | 3246  | 3417  | 3707  |
| MSTRG. 515. 1  | noncoding | -0. 0151552 | 858   | 1026  | 4307  |
| MSTRG. 521. 1  | coding    | 0. 079      | 879   | 1404  | 2518  |
| MSTRG. 521. 3  | noncoding | -0. 0360448 | 1716  | 2049  | 2203  |
| MSTRG. 521. 4  | noncoding | -0. 03072   | 1833  | 2139  | 2292  |
| MSTRG. 521. 6  | noncoding | -0. 159744  | 654   | 705   | 1818  |
| MSTRG. 521. 7  | coding    | 0. 079      | 789   | 1314  | 2428  |
| MSTRG. 526. 3  | coding    | 0. 183      | 0     | 600   | 2484  |
| MSTRG. 526. 1  | coding    | 0. 183      | 0     | 600   | 5409  |

|                |           |             |       |       |       |
|----------------|-----------|-------------|-------|-------|-------|
| MSTRG. 526. 2  | noncoding | -0. 1232896 | 0     | 327   | 10942 |
| MSTRG. 527. 2  | noncoding | -0. 0294912 | 1950  | 2394  | 2549  |
| MSTRG. 533. 2  | noncoding | -0. 0659456 | 285   | 306   | 620   |
| MSTRG. 533. 3  | coding    | 0. 121      | 39    | 2448  | 2975  |
| MSTRG. 535. 1  | coding    | 0. 151      | 216   | 630   | 1805  |
| MSTRG. 535. 4  | coding    | 0. 149      | 228   | 654   | 2959  |
| MSTRG. 538. 1  | coding    | 0. 16       | 330   | 2115  | 4464  |
| MSTRG. 538. 2  | coding    | 0. 162      | 720   | 2508  | 4857  |
| MSTRG. 538. 3  | coding    | 0. 16       | 285   | 2070  | 4420  |
| MSTRG. 538. 4  | coding    | 0. 162      | 558   | 2346  | 4694  |
| MSTRG. 539. 1  | noncoding | -0. 045056  | 2289  | 2394  | 2739  |
| MSTRG. 570. 1  | coding    | 0. 482      | 1524  | 3669  | 4124  |
| MSTRG. 570. 15 | coding    | 0. 482      | 18141 | 20286 | 28296 |
| MSTRG. 570. 14 | coding    | 0. 489      | 579   | 2718  | 10728 |
| MSTRG. 570. 16 | coding    | 0. 489      | 14736 | 16875 | 24886 |
| MSTRG. 570. 18 | coding    | 0. 489      | 1056  | 3195  | 11197 |
| MSTRG. 570. 17 | coding    | 0. 489      | 1203  | 3342  | 11343 |
| MSTRG. 570. 19 | coding    | 0. 489      | 1545  | 3684  | 11680 |
| MSTRG. 570. 20 | coding    | 0. 482      | 2010  | 4155  | 12149 |
| MSTRG. 570. 22 | coding    | 0. 489      | 18240 | 20379 | 28372 |
| MSTRG. 570. 21 | coding    | 0. 482      | 1428  | 3573  | 11567 |
| MSTRG. 570. 23 | coding    | 0. 482      | 1332  | 3477  | 11470 |
| MSTRG. 571. 1  | coding    | 0. 086      | 1119  | 1713  | 1869  |
| MSTRG. 572. 1  | noncoding | -0. 0385024 | 741   | 1065  | 1690  |
| MSTRG. 570. 24 | noncoding | -0. 0544768 | 4245  | 4377  | 12937 |
| MSTRG. 573. 1  | noncoding | -0. 0004096 | 0     | 0     | 884   |
| MSTRG. 574. 1  | noncoding | -0. 0016384 | 1554  | 1692  | 1848  |
| MSTRG. 575. 1  | noncoding | -0. 0004096 | 0     | 0     | 265   |
| MSTRG. 576. 1  | noncoding | -0. 090112  | 996   | 1086  | 1934  |
| MSTRG. 577. 1  | noncoding | -0. 032768  | 3114  | 3177  | 3572  |
| MSTRG. 578. 1  | noncoding | -0. 0167936 | 1425  | 1530  | 12679 |
| MSTRG. 570. 25 | noncoding | -0. 0442368 | 1221  | 1254  | 2096  |
| MSTRG. 579. 1  | coding    | 0. 108      | 3276  | 3342  | 6774  |
| MSTRG. 580. 1  | coding    | 0. 087      | 3051  | 3486  | 3642  |
| MSTRG. 581. 1  | noncoding | -0. 049152  | 1716  | 1791  | 9689  |
| MSTRG. 582. 1  | noncoding | -0. 0196608 | 6420  | 6582  | 7226  |
| MSTRG. 583. 1  | noncoding | -0. 0991232 | 414   | 444   | 792   |
| MSTRG. 584. 1  | noncoding | -0. 06144   | 1179  | 1221  | 1597  |
| MSTRG. 546. 1  | coding    | 0. 387      | 114   | 813   | 1478  |
| MSTRG. 546. 2  | coding    | 0. 334      | 0     | 849   | 1548  |
| MSTRG. 547. 1  | coding    | 0. 281      | 264   | 1257  | 1414  |
| MSTRG. 560. 4  | coding    | 0. 147      | 693   | 1893  | 3605  |
| MSTRG. 560. 1  | coding    | 0. 23       | 0     | 837   | 3265  |
| MSTRG. 560. 6  | coding    | 0. 147      | 474   | 1674  | 1888  |
| MSTRG. 561. 1  | noncoding | -0. 08192   | 1482  | 1509  | 2009  |
| MSTRG. 562. 1  | noncoding | -0. 073728  | 489   | 519   | 2221  |
| MSTRG. 564. 1  | noncoding | -0. 0045056 | 375   | 432   | 827   |
| MSTRG. 601. 2  | coding    | 0. 123      | 678   | 1482  | 1650  |
| MSTRG. 615. 6  | coding    | 0. 13       | 282   | 1161  | 1420  |
| MSTRG. 615. 4  | coding    | 0. 147      | 243   | 1284  | 1543  |
| MSTRG. 615. 5  | coding    | 0. 153      | 153   | 1284  | 1544  |
| MSTRG. 616. 1  | noncoding | -0. 04096   | 204   | 210   | 1868  |
| MSTRG. 617. 1  | noncoding | -0. 016384  | 0     | 36    | 2030  |
| MSTRG. 622. 2  | coding    | 0. 036      | 513   | 930   | 6793  |

|                |           |             |       |       |       |
|----------------|-----------|-------------|-------|-------|-------|
| MSTRG. 622. 3  | coding    | 0. 036      | 513   | 930   | 5259  |
| MSTRG. 622. 4  | coding    | 0. 037      | 603   | 966   | 6825  |
| MSTRG. 623. 1  | noncoding | -0. 1077248 | 201   | 222   | 1389  |
| MSTRG. 624. 2  | coding    | 0. 272      | 174   | 999   | 3651  |
| MSTRG. 624. 3  | coding    | 0. 28       | 0     | 864   | 3503  |
| MSTRG. 625. 1  | noncoding | -0. 0077824 | 561   | 825   | 1091  |
| MSTRG. 627. 1  | coding    | 0. 084      | 657   | 930   | 2349  |
| MSTRG. 628. 1  | coding    | 0. 229      | 132   | 1371  | 2622  |
| MSTRG. 628. 2  | coding    | 0. 231      | 78    | 1296  | 2721  |
| MSTRG. 628. 3  | coding    | 0. 229      | 162   | 1401  | 1946  |
| MSTRG. 628. 6  | coding    | 0. 231      | 798   | 2016  | 3441  |
| MSTRG. 628. 5  | coding    | 0. 231      | 30    | 1248  | 1994  |
| MSTRG. 639. 1  | noncoding | -0. 0339968 | 1755  | 1947  | 4455  |
| MSTRG. 639. 2  | noncoding | -0. 0159744 | 1953  | 2103  | 12639 |
| MSTRG. 645. 1  | noncoding | -0. 0643072 | 936   | 981   | 2423  |
| MSTRG. 646. 1  | coding    | 0. 041      | 5811  | 7812  | 9004  |
| MSTRG. 646. 3  | coding    | 0. 03       | 3     | 915   | 3301  |
| MSTRG. 646. 4  | noncoding | -0. 0667648 | 0     | 507   | 4504  |
| MSTRG. 633. 4  | coding    | 0. 14       | 1575  | 1854  | 2317  |
| MSTRG. 633. 5  | coding    | 0. 115      | 1386  | 1749  | 2214  |
| MSTRG. 633. 6  | coding    | 0. 115      | 1416  | 1779  | 2171  |
| MSTRG. 633. 7  | coding    | 0. 14       | 1515  | 1794  | 2186  |
| MSTRG. 635. 1  | noncoding | -0. 057344  | 471   | 537   | 810   |
| MSTRG. 635. 2  | noncoding | -0. 073728  | 81    | 177   | 475   |
| MSTRG. 650. 1  | coding    | 0. 112      | 1884  | 3003  | 8225  |
| MSTRG. 665. 2  | noncoding | -0. 1851392 | 0     | 81    | 1579  |
| MSTRG. 665. 3  | noncoding | -0. 008192  | 969   | 972   | 1257  |
| MSTRG. 671. 6  | coding    | 0. 464      | 0     | 3564  | 5177  |
| MSTRG. 671. 9  | coding    | 0. 446      | 633   | 2148  | 2301  |
| MSTRG. 671. 10 | coding    | 0. 454      | 0     | 3795  | 3950  |
| MSTRG. 671. 12 | coding    | 0. 454      | 0     | 3795  | 3950  |
| MSTRG. 671. 15 | coding    | 0. 455      | 0     | 3759  | 3914  |
| MSTRG. 671. 16 | coding    | 0. 455      | 0     | 3759  | 3914  |
| MSTRG. 671. 18 | coding    | 0. 168      | 264   | 822   | 1357  |
| MSTRG. 672. 1  | coding    | 0. 076      | 2952  | 4074  | 6181  |
| MSTRG. 667. 3  | coding    | 0. 046      | 588   | 1284  | 2241  |
| MSTRG. 691. 1  | coding    | 0. 422      | 4992  | 12093 | 13843 |
| MSTRG. 691. 2  | coding    | 0. 42       | 4992  | 12120 | 13870 |
| MSTRG. 691. 5  | coding    | 0. 442      | 0     | 4878  | 11375 |
| MSTRG. 691. 6  | coding    | 0. 445      | 0     | 4851  | 12421 |
| MSTRG. 691. 3  | coding    | 0. 404      | 0     | 8817  | 14952 |
| MSTRG. 691. 7  | noncoding | -0. 008192  | 39    | 45    | 341   |
| MSTRG. 691. 8  | coding    | 0. 419      | 1368  | 8661  | 9053  |
| MSTRG. 691. 9  | noncoding | -0. 0782336 | 22089 | 22398 | 23036 |
| MSTRG. 691. 10 | coding    | 0. 423      | 690   | 7698  | 9449  |
| MSTRG. 691. 11 | coding    | 0. 419      | 588   | 7884  | 13172 |
| MSTRG. 691. 12 | noncoding | -0. 0385024 | 1866  | 1896  | 2639  |
| MSTRG. 693. 1  | noncoding | -0. 0401408 | 1065  | 1563  | 10826 |
| MSTRG. 694. 1  | noncoding | -0. 016384  | 1527  | 1650  | 2144  |
| MSTRG. 691. 13 | coding    | 0. 42       | 2391  | 9591  | 9745  |
| MSTRG. 691. 14 | coding    | 0. 42       | 6702  | 13575 | 15325 |
| MSTRG. 691. 15 | coding    | 0. 421      | 807   | 7713  | 9401  |
| MSTRG. 691. 17 | coding    | 0. 391      | 23253 | 28689 | 30379 |
| MSTRG. 691. 18 | coding    | 0. 097      | 1158  | 1728  | 15278 |

|                |           |             |      |      |       |
|----------------|-----------|-------------|------|------|-------|
| MSTRG. 695. 1  | noncoding | -0. 0540672 | 4383 | 4692 | 5304  |
| MSTRG. 691. 21 | noncoding | -0. 1056768 | 1488 | 1749 | 14645 |
| MSTRG. 691. 20 | coding    | 0. 368      | 1239 | 3429 | 5117  |
| MSTRG. 691. 22 | coding    | 0. 364      | 1239 | 3663 | 4118  |
| MSTRG. 696. 1  | noncoding | -0. 008192  | 2796 | 2931 | 6548  |
| MSTRG. 675. 2  | coding    | 0. 131      | 930  | 5190 | 10001 |
| MSTRG. 681. 5  | coding    | 0. 083      | 333  | 2637 | 2790  |
| MSTRG. 681. 4  | coding    | 0. 078      | 867  | 3135 | 3288  |
| MSTRG. 684. 1  | coding    | 0. 076      | 102  | 1197 | 1615  |
| MSTRG. 684. 4  | coding    | 0. 096      | 0    | 1176 | 1406  |
| MSTRG. 699. 1  | coding    | 0. 02       | 45   | 1704 | 2576  |
| MSTRG. 699. 3  | coding    | 0. 022      | 45   | 1701 | 4028  |
| MSTRG. 699. 4  | coding    | 0. 041      | 678  | 1707 | 2441  |
| MSTRG. 702. 1  | coding    | 0. 074      | 24   | 243  | 3322  |
| MSTRG. 704. 4  | coding    | 0. 033      | 2847 | 3306 | 4609  |
| MSTRG. 704. 6  | noncoding | -0. 012288  | 1278 | 1326 | 2959  |
| MSTRG. 704. 7  | coding    | 0. 259      | 0    | 228  | 13606 |
| MSTRG. 685. 2  | noncoding | -0. 02048   | 6366 | 6459 | 6877  |
| MSTRG. 685. 1  | noncoding | -0. 02048   | 4560 | 4653 | 5119  |
| MSTRG. 685. 3  | coding    | 0. 011      | 708  | 984  | 4736  |
| MSTRG. 687. 5  | coding    | 0. 335      | 399  | 2865 | 5563  |
| MSTRG. 687. 6  | coding    | 0. 18       | 237  | 1248 | 1552  |
| MSTRG. 705. 6  | coding    | 0. 392      | 4395 | 6228 | 7076  |
| MSTRG. 705. 3  | coding    | 0. 471      | 0    | 3051 | 3897  |
| MSTRG. 705. 4  | coding    | 0. 431      | 5661 | 9156 | 10002 |
| MSTRG. 705. 5  | coding    | 0. 438      | 1299 | 4464 | 5311  |
| MSTRG. 705. 1  | coding    | 0. 466      | 1332 | 4419 | 5266  |
| MSTRG. 705. 7  | coding    | 0. 463      | 1260 | 4392 | 5212  |
| MSTRG. 705. 8  | coding    | 0. 466      | 1197 | 4284 | 5104  |
| MSTRG. 706. 3  | coding    | 0. 075      | 0    | 2346 | 5291  |
| MSTRG. 706. 4  | noncoding | -0. 0372736 | 1335 | 1614 | 5449  |
| MSTRG. 707. 1  | noncoding | -0. 02048   | 0    | 117  | 653   |
| MSTRG. 708. 1  | coding    | 0. 262      | 159  | 1119 | 5127  |
| MSTRG. 708. 5  | coding    | 0. 26       | 2037 | 2856 | 3198  |
| MSTRG. 708. 4  | coding    | 0. 251      | 273  | 1350 | 1556  |
| MSTRG. 708. 3  | coding    | 0. 26       | 159  | 978  | 1320  |
| MSTRG. 710. 3  | coding    | 0. 184      | 0    | 636  | 6744  |
| MSTRG. 713. 3  | coding    | 0. 053      | 558  | 1386 | 1801  |
| MSTRG. 714. 1  | coding    | 0. 136      | 81   | 528  | 1915  |
| MSTRG. 714. 2  | coding    | 0. 248      | 0    | 801  | 2194  |
| MSTRG. 715. 1  | coding    | 0. 073      | 99   | 630  | 3601  |
| MSTRG. 717. 1  | noncoding | -0. 0004096 | 0    | 0    | 516   |
| MSTRG. 718. 1  | noncoding | -0. 086016  | 1113 | 1188 | 1535  |
| MSTRG. 730. 7  | coding    | 0. 059      | 327  | 1395 | 2727  |
| MSTRG. 731. 1  | noncoding | -0. 0311296 | 249  | 294  | 719   |
| MSTRG. 732. 1  | noncoding | -0. 016384  | 2136 | 2232 | 6110  |
| MSTRG. 733. 1  | noncoding | -0. 02048   | 891  | 996  | 1395  |
| MSTRG. 727. 2  | coding    | 0. 434      | 207  | 1230 | 1672  |
| MSTRG. 727. 3  | coding    | 0. 429      | 189  | 1200 | 1640  |
| MSTRG. 727. 4  | coding    | 0. 434      | 363  | 1386 | 1826  |
| MSTRG. 728. 1  | noncoding | -0. 0872448 | 0    | 699  | 2248  |
| MSTRG. 728. 2  | noncoding | -0. 0876544 | 6    | 690  | 1835  |
| MSTRG. 728. 3  | noncoding | -0. 1048576 | 0    | 555  | 1645  |
| MSTRG. 735. 1  | noncoding | -0. 0106496 | 606  | 627  | 1746  |

|               |           |             |      |      |       |
|---------------|-----------|-------------|------|------|-------|
| MSTRG. 739. 1 | coding    | 0. 095      | 3549 | 3798 | 4526  |
| MSTRG. 740. 1 | noncoding | -0. 0106496 | 3186 | 3348 | 3842  |
| MSTRG. 741. 1 | noncoding | -0. 0057344 | 741  | 939  | 3971  |
| MSTRG. 743. 2 | coding    | 0. 165      | 228  | 882  | 1318  |
| MSTRG. 752. 5 | coding    | 0. 082      | 249  | 561  | 972   |
| MSTRG. 752. 6 | coding    | 0. 082      | 312  | 624  | 918   |
| MSTRG. 755. 1 | noncoding | -0. 024576  | 0    | 66   | 518   |
| MSTRG. 756. 1 | noncoding | -0. 028672  | 2784 | 2910 | 3083  |
| MSTRG. 758. 1 | noncoding | -0. 0372736 | 4614 | 4764 | 5125  |
| MSTRG. 774. 1 | coding    | 0. 082      | 3072 | 3285 | 7359  |
| MSTRG. 776. 1 | noncoding | -0. 036864  | 5757 | 5859 | 6943  |
| MSTRG. 777. 1 | noncoding | -0. 116736  | 783  | 810  | 2218  |
| MSTRG. 770. 1 | coding    | 0. 127      | 147  | 399  | 552   |
| MSTRG. 771. 1 | noncoding | -0. 2777088 | 192  | 198  | 437   |
| MSTRG. 771. 2 | noncoding | -0. 069632  | 33   | 39   | 228   |
| MSTRG. 778. 1 | noncoding | -0. 02048   | 75   | 204  | 363   |
| MSTRG. 782. 2 | coding    | 0. 183      | 636  | 1965 | 18584 |
| MSTRG. 782. 3 | coding    | 0. 187      | 237  | 1980 | 17253 |
| MSTRG. 782. 4 | coding    | 0. 183      | 627  | 1956 | 2281  |
| MSTRG. 782. 5 | coding    | 0. 187      | 207  | 1950 | 3474  |
| MSTRG. 784. 1 | coding    | 0. 102      | 0    | 1350 | 1690  |
| MSTRG. 784. 2 | coding    | 0. 158      | 0    | 756  | 2254  |
| MSTRG. 786. 1 | coding    | 0. 26       | 39   | 726  | 2289  |
| MSTRG. 794. 2 | noncoding | -0. 0176128 | 165  | 276  | 535   |
| MSTRG. 803. 3 | coding    | 0. 249      | 405  | 1458 | 1988  |
| MSTRG. 804. 1 | noncoding | -0. 0913408 | 525  | 534  | 1257  |
| MSTRG. 804. 2 | noncoding | -0. 0004096 | 0    | 0    | 404   |
| MSTRG. 805. 1 | coding    | 0. 17       | 0    | 120  | 2354  |
| MSTRG. 806. 1 | coding    | 0. 297      | 2619 | 3126 | 3284  |
| MSTRG. 806. 4 | coding    | 0. 297      | 1386 | 1893 | 2048  |
| MSTRG. 801. 1 | noncoding | -0. 0299008 | 291  | 420  | 800   |
| MSTRG. 813. 2 | coding    | 0. 036      | 0    | 1824 | 6871  |
| MSTRG. 817. 1 | coding    | 0. 248      | 321  | 2007 | 5449  |
| MSTRG. 831. 2 | coding    | 0. 081      | 1053 | 5328 | 5847  |
| MSTRG. 831. 4 | coding    | 0. 092      | 258  | 3627 | 3823  |
| MSTRG. 833. 1 | noncoding | -0. 057344  | 15   | 24   | 236   |
| MSTRG. 835. 1 | coding    | 0. 285      | 0    | 597  | 4143  |
| MSTRG. 836. 2 | coding    | 0. 372      | 1386 | 2886 | 3156  |
| MSTRG. 837. 4 | coding    | 0. 345      | 633  | 4845 | 5318  |
| MSTRG. 839. 2 | coding    | 0. 221      | 228  | 882  | 1037  |
| MSTRG. 840. 3 | coding    | 0. 267      | 0    | 1209 | 1451  |
| MSTRG. 840. 2 | coding    | 0. 349      | 0    | 906  | 2211  |
| MSTRG. 841. 3 | coding    | 0. 302      | 54   | 3999 | 4153  |
| MSTRG. 841. 2 | coding    | 0. 302      | 381  | 4326 | 4479  |
| MSTRG. 854. 3 | coding    | 0. 288      | 417  | 2724 | 4121  |
| MSTRG. 855. 1 | noncoding | -0. 118784  | 4395 | 4911 | 5141  |
| MSTRG. 855. 2 | noncoding | -0. 012288  | 5130 | 5271 | 5732  |
| MSTRG. 848. 3 | coding    | 0. 039      | 369  | 1368 | 6790  |
| MSTRG. 848. 5 | coding    | 0. 039      | 2610 | 3609 | 4597  |
| MSTRG. 848. 6 | coding    | 0. 039      | 459  | 1458 | 2444  |
| MSTRG. 848. 8 | coding    | 0. 039      | 489  | 1488 | 2476  |
| MSTRG. 859. 4 | coding    | 0. 197      | 0    | 468  | 845   |
| MSTRG. 859. 6 | noncoding | -0. 016384  | 732  | 822  | 1525  |
| MSTRG. 862. 2 | coding    | 0. 054      | 1440 | 2433 | 6923  |

|                |           |             |       |       |       |
|----------------|-----------|-------------|-------|-------|-------|
| MSTRG. 862. 5  | noncoding | -0. 1867776 | 333   | 363   | 1214  |
| MSTRG. 862. 7  | noncoding | -0. 176128  | 354   | 399   | 1333  |
| MSTRG. 862. 6  | coding    | 0. 054      | 1350  | 2343  | 4094  |
| MSTRG. 862. 3  | coding    | 0. 054      | 1440  | 2433  | 4270  |
| MSTRG. 862. 8  | noncoding | -0. 0462848 | 6     | 198   | 1114  |
| MSTRG. 874. 1  | noncoding | -0. 0667648 | 774   | 831   | 2596  |
| MSTRG. 892. 3  | coding    | 0. 261      | 621   | 2586  | 7443  |
| MSTRG. 892. 2  | coding    | 0. 261      | 432   | 2397  | 7254  |
| MSTRG. 892. 1  | coding    | 0. 259      | 237   | 2865  | 7720  |
| MSTRG. 897. 2  | noncoding | -0. 0024576 | 954   | 1056  | 5388  |
| MSTRG. 914. 4  | coding    | 0. 372      | 591   | 1812  | 2234  |
| MSTRG. 914. 3  | coding    | 0. 45       | 0     | 1626  | 6733  |
| MSTRG. 914. 5  | coding    | 0. 39       | 609   | 1641  | 2062  |
| MSTRG. 915. 2  | coding    | 0. 449      | 0     | 2394  | 2892  |
| MSTRG. 915. 3  | coding    | 0. 457      | 135   | 2412  | 2908  |
| MSTRG. 908. 1  | noncoding | -0. 0004096 | 0     | 0     | 232   |
| MSTRG. 920. 1  | noncoding | -0. 0008192 | 5247  | 5364  | 6148  |
| MSTRG. 921. 1  | noncoding | -0. 0847872 | 0     | 75    | 591   |
| MSTRG. 945. 1  | coding    | 0. 455      | 0     | 357   | 629   |
| MSTRG. 934. 4  | coding    | 0. 156      | 216   | 1026  | 1661  |
| MSTRG. 951. 3  | coding    | 0. 048      | 1371  | 2379  | 4108  |
| MSTRG. 952. 1  | noncoding | -0. 0004096 | 0     | 0     | 342   |
| MSTRG. 956. 4  | coding    | 0. 173      | 0     | 1245  | 2429  |
| MSTRG. 957. 1  | noncoding | -0. 0643072 | 15681 | 15876 | 16602 |
| MSTRG. 959. 1  | noncoding | -0. 016384  | 162   | 249   | 834   |
| MSTRG. 965. 1  | noncoding | -0. 012288  | 537   | 678   | 926   |
| MSTRG. 965. 2  | noncoding | -0. 167936  | 546   | 567   | 3161  |
| MSTRG. 965. 3  | noncoding | -0. 0151552 | 336   | 384   | 538   |
| MSTRG. 979. 3  | coding    | 0. 115      | 147   | 3285  | 11959 |
| MSTRG. 979. 7  | coding    | 0. 122      | 351   | 786   | 2961  |
| MSTRG. 980. 3  | noncoding | -0. 057344  | 0     | 249   | 4964  |
| MSTRG. 981. 1  | noncoding | -0. 032768  | 7713  | 7815  | 9865  |
| MSTRG. 980. 5  | noncoding | -0. 02048   | 19965 | 20079 | 25559 |
| MSTRG. 980. 6  | noncoding | -0. 02048   | 13440 | 13554 | 19375 |
| MSTRG. 980. 7  | coding    | 0. 277      | 3411  | 7236  | 9626  |
| MSTRG. 985. 1  | noncoding | -0. 0053248 | 462   | 672   | 1485  |
| MSTRG. 967. 2  | coding    | 0. 148      | 267   | 660   | 3871  |
| MSTRG. 972. 2  | noncoding | -0. 0106496 | 180   | 366   | 1216  |
| MSTRG. 974. 1  | coding    | 0. 389      | 105   | 1818  | 2327  |
| MSTRG. 975. 1  | noncoding | -0. 0311296 | 2355  | 2571  | 2726  |
| MSTRG. 991. 1  | noncoding | -0. 057344  | 0     | 90    | 873   |
| MSTRG. 991. 2  | noncoding | -0. 057344  | 0     | 90    | 923   |
| MSTRG. 991. 3  | noncoding | -0. 057344  | 0     | 90    | 656   |
| MSTRG. 994. 1  | coding    | 0. 269      | 270   | 1743  | 1949  |
| MSTRG. 994. 2  | coding    | 0. 269      | 774   | 2247  | 2431  |
| MSTRG. 994. 3  | coding    | 0. 269      | 288   | 1761  | 1925  |
| MSTRG. 997. 1  | coding    | 0. 027      | 45    | 1776  | 6877  |
| MSTRG. 1000. 1 | coding    | 0. 121      | 324   | 3417  | 3712  |
| MSTRG. 1000. 2 | coding    | 0. 115      | 582   | 3630  | 3927  |
| MSTRG. 1005. 5 | noncoding | -0. 2732032 | 0     | 150   | 3684  |
| MSTRG. 1005. 6 | coding    | 0. 379      | 843   | 2559  | 4311  |
| MSTRG. 1002. 3 | noncoding | -0. 0073728 | 432   | 591   | 1227  |
| MSTRG. 1002. 4 | noncoding | -0. 0073728 | 393   | 552   | 1188  |
| MSTRG. 1008. 4 | coding    | 0. 158      | 456   | 897   | 1081  |

|                |           |            |       |       |       |
|----------------|-----------|------------|-------|-------|-------|
| MSTRG. 1013.4  | coding    | 0.03       | 528   | 2376  | 2651  |
| MSTRG. 1013.7  | coding    | 0.03       | 585   | 2436  | 2691  |
| MSTRG. 1013.8  | coding    | 0.03       | 585   | 2433  | 2687  |
| MSTRG. 1013.9  | coding    | 0.063      | 1089  | 1740  | 2613  |
| MSTRG. 1012.2  | noncoding | -0.114688  | 1830  | 1878  | 4015  |
| MSTRG. 1012.1  | noncoding | -0.114688  | 1830  | 1878  | 2210  |
| MSTRG. 1029.1  | coding    | 0.036      | 924   | 2088  | 2592  |
| MSTRG. 1029.3  | coding    | 0.048      | 42    | 1239  | 2629  |
| MSTRG. 1031.1  | coding    | 0.338      | 72    | 1038  | 7550  |
| MSTRG. 1031.2  | coding    | 0.338      | 777   | 1743  | 7277  |
| MSTRG. 1031.3  | coding    | 0.343      | 777   | 1242  | 2575  |
| MSTRG. 1041.2  | noncoding | -0.0651264 | 3357  | 3699  | 4311  |
| MSTRG. 1044.3  | coding    | 0.006      | 1836  | 2844  | 3261  |
| MSTRG. 1036.3  | coding    | 0.213      | 0     | 1677  | 3272  |
| MSTRG. 1037.1  | coding    | 0.159      | 918   | 1443  | 1931  |
| MSTRG. 1060.2  | coding    | 0.099      | 273   | 792   | 1073  |
| MSTRG. 1063.1  | coding    | 0.207      | 186   | 783   | 1393  |
| MSTRG. 1063.2  | coding    | 0.2        | 0     | 591   | 1201  |
| MSTRG. 1066.1  | coding    | 0.143      | 441   | 987   | 1454  |
| MSTRG. 1066.2  | coding    | 0.143      | 441   | 987   | 1498  |
| MSTRG. 1066.3  | coding    | 0.122      | 75    | 456   | 962   |
| MSTRG. 1065.1  | noncoding | -0.1732608 | 0     | 15    | 227   |
| MSTRG. 1070.1  | noncoding | -0.02048   | 279   | 318   | 473   |
| MSTRG. 1085.2  | coding    | 0.273      | 0     | 453   | 4713  |
| MSTRG. 1086.2  | coding    | 0.121      | 282   | 1194  | 2682  |
| MSTRG. 1096.1  | coding    | 0.069      | 147   | 2286  | 3021  |
| MSTRG. 1097.1  | noncoding | -0.049152  | 543   | 585   | 2344  |
| MSTRG. 1096.2  | coding    | 0.057      | 0     | 1962  | 8562  |
| MSTRG. 1108.1  | noncoding | -0.0380928 | 0     | 45    | 275   |
| MSTRG. 1119.1  | noncoding | -0.0004096 | 4017  | 4179  | 7339  |
| MSTRG. 1132.1  | coding    | 0.155      | 5760  | 6033  | 13698 |
| MSTRG. 1125.1  | coding    | 0.097      | 1605  | 2283  | 4084  |
| MSTRG. 1141.1  | noncoding | -0.02048   | 549   | 666   | 1539  |
| MSTRG. 1149.1  | noncoding | -0.0442368 | 294   | 342   | 2740  |
| MSTRG. 1150.1  | noncoding | -0.008192  | 54    | 177   | 457   |
| MSTRG. 1157.6  | coding    | 0.139      | 1569  | 2340  | 5509  |
| MSTRG. 1157.7  | coding    | 0.121      | 19953 | 20805 | 22857 |
| MSTRG. 1157.8  | coding    | 0.108      | 1368  | 2166  | 3188  |
| MSTRG. 1157.10 | coding    | 0.103      | 1089  | 1971  | 3019  |
| MSTRG. 1157.9  | coding    | 0.125      | 1089  | 1980  | 3003  |
| MSTRG. 1158.1  | noncoding | -0.06144   | 1503  | 1536  | 2676  |
| MSTRG. 1158.2  | noncoding | -0.06144   | 1491  | 1524  | 3976  |
| MSTRG. 1159.1  | noncoding | -0.014336  | 6735  | 6849  | 8625  |
| MSTRG. 1173.1  | noncoding | -0.02048   | 1716  | 1839  | 3213  |
| MSTRG. 1174.1  | noncoding | -0.0004096 | 2358  | 2499  | 3382  |
| MSTRG. 1175.1  | noncoding | -0.0483328 | 9735  | 9948  | 21537 |
| MSTRG. 1161.2  | coding    | 0.319      | 0     | 1071  | 2093  |
| MSTRG. 1161.3  | noncoding | -0.0569344 | 879   | 1188  | 2927  |
| MSTRG. 1164.2  | noncoding | -0.16384   | 681   | 693   | 1275  |
| MSTRG. 1167.1  | noncoding | -0.114688  | 72    | 129   | 285   |
| MSTRG. 1184.1  | noncoding | -0.012288  | 573   | 663   | 1977  |
| MSTRG. 1189.2  | noncoding | -0.1335296 | 21    | 633   | 815   |
| MSTRG. 1190.1  | noncoding | -0.0110592 | 330   | 366   | 677   |
| MSTRG. 1194.2  | coding    | 0.087      | 696   | 801   | 1625  |

|                 |           |             |      |      |       |
|-----------------|-----------|-------------|------|------|-------|
| MSTRG. 1196. 2  | coding    | 0. 06       | 480  | 1380 | 2186  |
| MSTRG. 1207. 1  | noncoding | -0. 831488  | 144  | 147  | 304   |
| MSTRG. 1209. 1  | noncoding | -0. 1007616 | 0    | 3    | 201   |
| MSTRG. 1214. 2  | noncoding | -0. 008192  | 786  | 855  | 1041  |
| MSTRG. 1215. 1  | noncoding | -0. 0012288 | 393  | 564  | 1241  |
| MSTRG. 1211. 1  | noncoding | -0. 0479232 | 57   | 204  | 360   |
| MSTRG. 1236. 4  | coding    | 0. 191      | 2655 | 3309 | 5657  |
| MSTRG. 1245. 2  | coding    | 0. 026      | 444  | 2082 | 2239  |
| MSTRG. 1250. 2  | noncoding | -0. 0335872 | 1524 | 1707 | 2835  |
| MSTRG. 1251. 1  | noncoding | -0. 0344064 | 369  | 1002 | 1162  |
| MSTRG. 1252. 4  | noncoding | -0. 008192  | 312  | 456  | 938   |
| MSTRG. 1253. 1  | noncoding | -0. 077824  | 84   | 147  | 411   |
| MSTRG. 1259. 2  | coding    | 0. 366      | 0    | 189  | 1089  |
| MSTRG. 1260. 1  | noncoding | -0. 045056  | 1200 | 1293 | 1804  |
| MSTRG. 1261. 2  | noncoding | -0. 012288  | 696  | 831  | 1242  |
| MSTRG. 1261. 5  | coding    | 0. 176      | 384  | 1296 | 1450  |
| MSTRG. 1261. 6  | coding    | 0. 1        | 855  | 1386 | 1541  |
| MSTRG. 1254. 1  | noncoding | -0. 073728  | 405  | 438  | 726   |
| MSTRG. 1263. 1  | coding    | 0. 059      | 0    | 2424 | 5495  |
| MSTRG. 1267. 4  | coding    | 0. 324      | 1923 | 3279 | 4855  |
| MSTRG. 1269. 1  | noncoding | -0. 0282624 | 30   | 321  | 478   |
| MSTRG. 1272. 1  | coding    | 0. 598      | 0    | 123  | 5637  |
| MSTRG. 1272. 4  | coding    | 0. 598      | 0    | 123  | 5009  |
| MSTRG. 1272. 6  | coding    | 0. 598      | 0    | 123  | 3588  |
| MSTRG. 1272. 7  | coding    | 0. 598      | 0    | 123  | 5724  |
| MSTRG. 1278. 2  | coding    | 0. 522      | 0    | 381  | 2526  |
| MSTRG. 1278. 3  | coding    | 0. 453      | 0    | 198  | 5293  |
| MSTRG. 1279. 2  | coding    | 0. 17       | 2733 | 3984 | 4337  |
| MSTRG. 1288. 3  | coding    | 0. 062      | 363  | 3435 | 3937  |
| MSTRG. 1288. 4  | coding    | 0. 153      | 2364 | 3021 | 3521  |
| MSTRG. 1288. 5  | coding    | 0. 135      | 1716 | 2307 | 2809  |
| MSTRG. 1285. 1  | noncoding | -0. 016384  | 201  | 396  | 720   |
| MSTRG. 1309. 1  | noncoding | -0. 18432   | 774  | 840  | 2948  |
| MSTRG. 1310. 2  | noncoding | -0. 02048   | 783  | 891  | 1897  |
| MSTRG. 1310. 1  | noncoding | -0. 135168  | 249  | 291  | 879   |
| MSTRG. 1310. 3  | noncoding | -0. 08192   | 117  | 132  | 286   |
| MSTRG. 1311. 1  | coding    | 0. 109      | 99   | 852  | 10779 |
| MSTRG. 1311. 7  | coding    | 0. 11       | 1719 | 2472 | 3115  |
| MSTRG. 1311. 5  | coding    | 0. 114      | 1521 | 2283 | 2926  |
| MSTRG. 1311. 6  | coding    | 0. 104      | 1665 | 2412 | 3055  |
| MSTRG. 1311. 8  | coding    | 0. 11       | 5247 | 5961 | 6596  |
| MSTRG. 1311. 9  | coding    | 0. 103      | 1788 | 2475 | 3104  |
| MSTRG. 1311. 10 | coding    | 0. 102      | 195  | 1245 | 1873  |
| MSTRG. 1309. 2  | noncoding | -0. 18432   | 1011 | 1077 | 2817  |
| MSTRG. 1312. 1  | noncoding | -0. 192512  | 1539 | 1623 | 1779  |
| MSTRG. 1314. 2  | coding    | 0. 022      | 126  | 882  | 1478  |
| MSTRG. 1317. 1  | noncoding | -0. 049152  | 1569 | 1653 | 1912  |
| MSTRG. 1318. 2  | coding    | 0. 058      | 1137 | 2523 | 2861  |
| MSTRG. 1318. 3  | coding    | 0. 059      | 354  | 2451 | 3458  |
| MSTRG. 1319. 1  | noncoding | -0. 0004096 | 1101 | 1128 | 2063  |
| MSTRG. 1320. 1  | noncoding | -0. 004096  | 1845 | 1965 | 3196  |
| MSTRG. 1321. 1  | noncoding | -0. 0208896 | 654  | 798  | 1464  |
| MSTRG. 1323. 1  | noncoding | -0. 0090112 | 3039 | 3192 | 10102 |
| MSTRG. 1318. 4  | noncoding | -0. 0008192 | 4455 | 4602 | 4913  |



|                 |           |             |      |      |       |
|-----------------|-----------|-------------|------|------|-------|
| MSTRG. 1325. 1  | coding    | 0. 329      | 0    | 1554 | 5485  |
| MSTRG. 1332. 2  | noncoding | -0. 0843776 | 111  | 831  | 10108 |
| MSTRG. 1338. 1  | coding    | 0. 146      | 0    | 2343 | 3433  |
| MSTRG. 1338. 2  | coding    | 0. 143      | 0    | 2187 | 3005  |
| MSTRG. 1338. 4  | coding    | 0. 14       | 369  | 2424 | 3063  |
| MSTRG. 1338. 3  | coding    | 0. 151      | 0    | 2298 | 2937  |
| MSTRG. 1338. 7  | coding    | 0. 151      | 213  | 1233 | 2533  |
| MSTRG. 1338. 8  | coding    | 0. 181      | 603  | 1326 | 2338  |
| MSTRG. 1339. 1  | noncoding | -0. 0651264 | 873  | 1140 | 1295  |
| MSTRG. 1344. 2  | coding    | 0. 423      | 138  | 714  | 3722  |
| MSTRG. 1346. 1  | coding    | 0. 236      | 0    | 780  | 4771  |
| MSTRG. 1351. 5  | coding    | 0. 08       | 885  | 4152 | 5113  |
| MSTRG. 1351. 6  | coding    | 0. 08       | 1056 | 4323 | 5392  |
| MSTRG. 1352. 6  | coding    | 0. 259      | 18   | 762  | 2937  |
| MSTRG. 1352. 2  | noncoding | -0. 024576  | 1932 | 2127 | 2768  |
| MSTRG. 1352. 4  | noncoding | -0. 024576  | 1983 | 2178 | 2552  |
| MSTRG. 1352. 9  | noncoding | -0. 0700416 | 2346 | 2544 | 2699  |
| MSTRG. 1352. 11 | noncoding | -0. 0294912 | 477  | 795  | 1166  |
| MSTRG. 1352. 12 | noncoding | -0. 0700416 | 837  | 1035 | 1188  |
| MSTRG. 1352. 10 | noncoding | -0. 024576  | 426  | 621  | 939   |
| MSTRG. 1352. 13 | noncoding | -0. 0700416 | 870  | 1068 | 1222  |
| MSTRG. 1352. 14 | noncoding | -0. 0258048 | 405  | 891  | 1044  |
| MSTRG. 1352. 15 | coding    | 0. 308      | 0    | 636  | 1326  |
| MSTRG. 1355. 4  | coding    | 0. 224      | 342  | 2031 | 2229  |
| MSTRG. 1363. 1  | noncoding | -0. 0544768 | 0    | 309  | 1382  |
| MSTRG. 1367. 2  | noncoding | -0. 016384  | 5745 | 5847 | 6001  |
| MSTRG. 1367. 3  | noncoding | -0. 03072   | 3690 | 3852 | 4006  |
| MSTRG. 1380. 9  | coding    | 0. 086      | 1290 | 1464 | 2339  |
| MSTRG. 1380. 7  | coding    | 0. 064      | 0    | 2391 | 3406  |
| MSTRG. 1380. 5  | coding    | 0. 069      | 0    | 2838 | 3330  |
| MSTRG. 1380. 8  | coding    | 0. 065      | 654  | 2352 | 3368  |
| MSTRG. 1380. 10 | coding    | 0. 015      | 162  | 447  | 2202  |
| MSTRG. 1380. 11 | noncoding | -0. 1019904 | 0    | 528  | 1353  |
| MSTRG. 1382. 1  | noncoding | -0. 06144   | 285  | 366  | 1423  |
| MSTRG. 1384. 4  | coding    | 0. 09       | 2061 | 3963 | 5851  |
| MSTRG. 1384. 3  | coding    | 0. 053      | 2859 | 8340 | 10228 |
| MSTRG. 1384. 5  | noncoding | -0. 014336  | 1872 | 1914 | 2261  |
| MSTRG. 1387. 1  | coding    | 0. 207      | 0    | 1152 | 1400  |
| MSTRG. 1391. 1  | coding    | 0. 233      | 666  | 1374 | 2349  |
| MSTRG. 1395. 10 | coding    | 0. 113      | 792  | 2661 | 2814  |
| MSTRG. 1395. 11 | coding    | 0. 113      | 384  | 2253 | 2407  |
| MSTRG. 1395. 12 | coding    | 0. 113      | 321  | 2190 | 2343  |
| MSTRG. 1395. 13 | coding    | 0. 111      | 477  | 2493 | 2648  |
| MSTRG. 1395. 14 | coding    | 0. 113      | 225  | 2094 | 2249  |
| MSTRG. 1395. 15 | coding    | 0. 113      | 477  | 2346 | 2501  |
| MSTRG. 1395. 17 | coding    | 0. 132      | 321  | 1458 | 2380  |
| MSTRG. 1395. 18 | coding    | 0. 111      | 315  | 2331 | 2484  |
| MSTRG. 1395. 19 | coding    | 0. 114      | 285  | 2298 | 2452  |
| MSTRG. 1395. 20 | coding    | 0. 132      | 477  | 1614 | 2538  |
| MSTRG. 1395. 21 | coding    | 0. 118      | 372  | 2220 | 2375  |
| MSTRG. 1395. 22 | coding    | 0. 118      | 303  | 2151 | 2306  |
| MSTRG. 1395. 23 | coding    | 0. 114      | 291  | 2304 | 2458  |
| MSTRG. 1395. 24 | coding    | 0. 116      | 303  | 2298 | 2453  |
| MSTRG. 1396. 1  | noncoding | -0. 0319488 | 72   | 273  | 3276  |

|                |           |             |      |      |       |
|----------------|-----------|-------------|------|------|-------|
| MSTRG. 1396. 2 | noncoding | -0. 0319488 | 12   | 213  | 2871  |
| MSTRG. 1394. 1 | noncoding | -0. 17408   | 54   | 60   | 290   |
| MSTRG. 1398. 1 | coding    | 0. 313      | 0    | 1530 | 2247  |
| MSTRG. 1398. 2 | coding    | 0. 231      | 417  | 1335 | 1881  |
| MSTRG. 1407. 1 | noncoding | -0. 0004096 | 78   | 204  | 581   |
| MSTRG. 1408. 1 | coding    | 0. 498      | 78   | 1110 | 1263  |
| MSTRG. 1414. 3 | coding    | 0. 317      | 0    | 282  | 1118  |
| MSTRG. 1415. 1 | coding    | 0. 268      | 480  | 2274 | 2427  |
| MSTRG. 1415. 3 | coding    | 0. 313      | 432  | 1965 | 2959  |
| MSTRG. 1416. 2 | coding    | 0. 417      | 459  | 1596 | 1785  |
| MSTRG. 1419. 4 | noncoding | -0. 0749568 | 1860 | 2109 | 2481  |
| MSTRG. 1419. 3 | coding    | 0. 174      | 0    | 1242 | 1761  |
| MSTRG. 1420. 1 | noncoding | -0. 0454656 | 57   | 243  | 1157  |
| MSTRG. 1421. 1 | coding    | 0. 2        | 240  | 1434 | 2498  |
| MSTRG. 1426. 2 | coding    | 0. 457      | 0    | 2409 | 2591  |
| MSTRG. 1432. 3 | noncoding | -0. 098304  | 39   | 303  | 766   |
| MSTRG. 1432. 2 | coding    | 0. 268      | 231  | 540  | 1002  |
| MSTRG. 1433. 1 | coding    | 0. 347      | 0    | 426  | 2566  |
| MSTRG. 1433. 5 | coding    | 0. 283      | 2313 | 4281 | 6677  |
| MSTRG. 1429. 2 | coding    | 0. 43       | 243  | 1077 | 6349  |
| MSTRG. 1429. 3 | coding    | 0. 443      | 699  | 1557 | 6732  |
| MSTRG. 1428. 1 | coding    | 0. 505      | 0    | 309  | 573   |
| MSTRG. 1436. 1 | coding    | 0. 415      | 0    | 1260 | 8252  |
| MSTRG. 1436. 4 | noncoding | -0. 1212416 | 0    | 963  | 5668  |
| MSTRG. 1436. 2 | coding    | 0. 415      | 0    | 1260 | 8206  |
| MSTRG. 1436. 3 | coding    | 0. 391      | 3678 | 4917 | 11908 |
| MSTRG. 1437. 1 | noncoding | -0. 0413696 | 1059 | 1428 | 2673  |
| MSTRG. 1438. 1 | noncoding | -0. 0446464 | 1449 | 2739 | 8281  |
| MSTRG. 1436. 7 | coding    | 0. 351      | 354  | 1782 | 5744  |
| MSTRG. 1436. 6 | coding    | 0. 351      | 1209 | 2637 | 8608  |
| MSTRG. 1439. 2 | coding    | 0. 421      | 9    | 3150 | 4070  |
| MSTRG. 1440. 1 | noncoding | -0. 0610304 | 0    | 411  | 894   |
| MSTRG. 1441. 1 | coding    | 0. 353      | 102  | 912  | 1392  |
| MSTRG. 1447. 1 | noncoding | -0. 0282624 | 1125 | 1674 | 2899  |
| MSTRG. 1449. 1 | coding    | 0. 435      | 216  | 1923 | 2207  |
| MSTRG. 1450. 1 | coding    | 0. 389      | 0    | 1122 | 2879  |
| MSTRG. 1451. 2 | noncoding | -0. 0565248 | 0    | 753  | 906   |
| MSTRG. 1451. 3 | noncoding | -0. 073728  | 0    | 534  | 953   |
| MSTRG. 1454. 5 | coding    | 0. 371      | 972  | 1455 | 2016  |
| MSTRG. 1455. 2 | noncoding | -0. 0610304 | 33   | 726  | 1196  |
| MSTRG. 1455. 1 | noncoding | -0. 0843776 | 132  | 684  | 992   |
| MSTRG. 1460. 1 | noncoding | -0. 0237568 | 348  | 744  | 1037  |
| MSTRG. 1463. 2 | coding    | 0. 371      | 93   | 1347 | 1501  |
| MSTRG. 1464. 1 | noncoding | -0. 106496  | 1824 | 2370 | 2525  |
| MSTRG. 1465. 2 | coding    | 0. 424      | 465  | 1188 | 2144  |
| MSTRG. 1467. 2 | coding    | 0. 372      | 0    | 3993 | 4285  |
| MSTRG. 1469. 1 | coding    | 0. 475      | 51   | 1788 | 2465  |
| MSTRG. 1470. 1 | noncoding | -0. 0933888 | 0    | 345  | 1880  |
| MSTRG. 1475. 3 | noncoding | -0. 0475136 | 0    | 690  | 4992  |
| MSTRG. 1475. 2 | coding    | 0. 383      | 195  | 1413 | 1949  |
| MSTRG. 1475. 4 | coding    | 0. 383      | 231  | 1449 | 1986  |
| MSTRG. 1475. 5 | coding    | 0. 383      | 312  | 1530 | 2068  |
| MSTRG. 1475. 6 | coding    | 0. 393      | 231  | 1374 | 1911  |
| MSTRG. 1477. 1 | noncoding | -0. 0299008 | 7812 | 7989 | 10235 |

|                 |           |             |       |       |       |
|-----------------|-----------|-------------|-------|-------|-------|
| MSTRG. 1473. 1  | coding    | 0. 515      | 15    | 3165  | 4010  |
| MSTRG. 1473. 2  | coding    | 0. 522      | 0     | 3093  | 3939  |
| MSTRG. 1494. 2  | coding    | 0. 539      | 99    | 783   | 940   |
| MSTRG. 1495. 1  | noncoding | -0. 0323584 | 0     | 771   | 927   |
| MSTRG. 1496. 1  | coding    | 0. 279      | 849   | 6138  | 6383  |
| MSTRG. 1497. 1  | coding    | 0. 351      | 0     | 2112  | 4239  |
| MSTRG. 1497. 2  | coding    | 0. 349      | 0     | 2109  | 2352  |
| MSTRG. 1499. 1  | coding    | 0. 302      | 9     | 909   | 4282  |
| MSTRG. 1500. 3  | coding    | 0. 276      | 363   | 1380  | 1648  |
| MSTRG. 1501. 5  | coding    | 0. 429      | 102   | 9360  | 9914  |
| MSTRG. 1501. 1  | coding    | 0. 424      | 102   | 9414  | 9970  |
| MSTRG. 1501. 2  | coding    | 0. 429      | 102   | 9252  | 9811  |
| MSTRG. 1501. 3  | coding    | 0. 428      | 102   | 9234  | 9793  |
| MSTRG. 1501. 4  | coding    | 0. 425      | 102   | 9432  | 9991  |
| MSTRG. 1501. 6  | coding    | 0. 425      | 102   | 9522  | 10081 |
| MSTRG. 1501. 9  | coding    | 0. 429      | 102   | 9255  | 9808  |
| MSTRG. 1501. 10 | coding    | 0. 425      | 87    | 9420  | 9972  |
| MSTRG. 1501. 11 | coding    | 0. 424      | 87    | 9396  | 9948  |
| MSTRG. 1501. 14 | coding    | 0. 454      | 3423  | 5778  | 6479  |
| MSTRG. 1481. 1  | noncoding | -0. 036864  | 0     | 60    | 667   |
| MSTRG. 1483. 2  | coding    | 0. 295      | 0     | 780   | 2973  |
| MSTRG. 1484. 1  | noncoding | -0. 0794624 | 66    | 381   | 1225  |
| MSTRG. 1512. 6  | coding    | 0. 121      | 402   | 1605  | 1759  |
| MSTRG. 1512. 5  | noncoding | -0. 0700416 | 984   | 1329  | 1484  |
| MSTRG. 1512. 7  | noncoding | -0. 0507904 | 34794 | 35139 | 35438 |
| MSTRG. 1512. 10 | coding    | 0. 117      | 6135  | 6537  | 12550 |
| MSTRG. 1512. 8  | noncoding | -0. 1093632 | 29484 | 29832 | 49985 |
| MSTRG. 1512. 9  | noncoding | -0. 0401408 | 12297 | 12663 | 12905 |
| MSTRG. 1512. 11 | noncoding | -0. 055296  | 12315 | 12525 | 33095 |
| MSTRG. 1512. 12 | noncoding | -0. 1093632 | 3096  | 3444  | 16815 |
| MSTRG. 1512. 13 | noncoding | -0. 0323584 | 1308  | 1836  | 20386 |
| MSTRG. 1512. 14 | noncoding | -0. 1093632 | 29484 | 29832 | 48143 |
| MSTRG. 1512. 15 | noncoding | -0. 1093632 | 17298 | 17646 | 31165 |
| MSTRG. 1512. 16 | noncoding | -0. 0417792 | 7680  | 7908  | 9064  |
| MSTRG. 1512. 17 | noncoding | -0. 114688  | 1905  | 1980  | 3323  |
| MSTRG. 1512. 18 | noncoding | -0. 1093632 | 1599  | 1947  | 6011  |
| MSTRG. 1512. 19 | coding    | 0. 07       | 2772  | 2892  | 9369  |
| MSTRG. 1514. 1  | coding    | 0. 296      | 858   | 1287  | 1464  |
| MSTRG. 1509. 3  | coding    | 0. 366      | 315   | 7053  | 7455  |
| MSTRG. 1511. 2  | coding    | 0. 283      | 0     | 1500  | 3101  |
| MSTRG. 1511. 3  | coding    | 0. 265      | 0     | 1614  | 6025  |
| MSTRG. 1511. 5  | coding    | 0. 271      | 810   | 2220  | 15714 |
| MSTRG. 1516. 1  | noncoding | -0. 0028672 | 78    | 405   | 675   |
| MSTRG. 1518. 1  | noncoding | -0. 002048  | 600   | 702   | 1247  |
| MSTRG. 1519. 1  | noncoding | -0. 1097728 | 414   | 636   | 790   |
| MSTRG. 1520. 2  | coding    | 0. 219      | 195   | 1158  | 4414  |
| MSTRG. 1535. 1  | noncoding | -0. 0483328 | 3027  | 3225  | 3533  |
| MSTRG. 1536. 1  | noncoding | -0. 057344  | 93    | 165   | 469   |
| MSTRG. 1537. 4  | coding    | 0. 02       | 285   | 411   | 626   |
| MSTRG. 1538. 1  | noncoding | -0. 1753088 | 0     | 78    | 4020  |
| MSTRG. 1538. 7  | coding    | 0. 097      | 4203  | 8319  | 8474  |
| MSTRG. 1538. 8  | coding    | 0. 032      | 366   | 900   | 1819  |
| MSTRG. 1538. 9  | coding    | 0. 131      | 2595  | 4089  | 5089  |
| MSTRG. 1538. 10 | coding    | 0. 104      | 453   | 3489  | 4773  |

|                 |           |             |       |       |       |
|-----------------|-----------|-------------|-------|-------|-------|
| MSTRG. 1538. 12 | coding    | 0. 111      | 4626  | 5763  | 6762  |
| MSTRG. 1538. 13 | coding    | 0. 111      | 4743  | 5982  | 6981  |
| MSTRG. 1526. 2  | coding    | 0. 401      | 0     | 951   | 2749  |
| MSTRG. 1531. 6  | noncoding | -0. 045056  | 324   | 426   | 2134  |
| MSTRG. 1531. 5  | noncoding | -0. 0188416 | 8391  | 8568  | 9026  |
| MSTRG. 1531. 4  | coding    | 0. 133      | 0     | 2205  | 5035  |
| MSTRG. 1531. 7  | coding    | 0. 119      | 12624 | 14808 | 17349 |
| MSTRG. 1532. 1  | noncoding | -0. 004096  | 960   | 1149  | 1785  |
| MSTRG. 1533. 1  | noncoding | -0. 06144   | 492   | 591   | 2264  |
| MSTRG. 1531. 8  | coding    | 0. 122      | 282   | 2397  | 5227  |
| MSTRG. 1531. 9  | coding    | 0. 124      | 282   | 2424  | 5254  |
| MSTRG. 1534. 1  | coding    | 0. 069      | 2610  | 3027  | 4151  |
| MSTRG. 1531. 10 | coding    | 0. 125      | 2331  | 4473  | 7302  |
| MSTRG. 1528. 1  | noncoding | -0. 0397312 | 1098  | 1989  | 2444  |
| MSTRG. 1528. 3  | noncoding | -0. 0290816 | 2034  | 2913  | 3067  |
| MSTRG. 1530. 1  | noncoding | -0. 0466944 | 156   | 966   | 6984  |
| MSTRG. 1544. 1  | coding    | 0. 336      | 231   | 1629  | 3160  |
| MSTRG. 1544. 2  | coding    | 0. 297      | 0     | 1719  | 2859  |
| MSTRG. 1545. 1  | noncoding | -0. 0004096 | 0     | 0     | 224   |
| MSTRG. 1549. 1  | noncoding | -0. 0016384 | 285   | 417   | 778   |
| MSTRG. 1550. 5  | coding    | 0. 165      | 0     | 2778  | 2949  |
| MSTRG. 1550. 6  | coding    | 0. 165      | 0     | 3576  | 4408  |
| MSTRG. 1550. 7  | coding    | 0. 233      | 1500  | 1989  | 2473  |
| MSTRG. 1554. 2  | coding    | 0. 653      | 0     | 1269  | 2473  |
| MSTRG. 1555. 1  | noncoding | -0. 024576  | 1065  | 1170  | 1969  |
| MSTRG. 1556. 1  | noncoding | -0. 0401408 | 1152  | 1527  | 5429  |
| MSTRG. 1562. 3  | coding    | 0. 068      | 567   | 933   | 1100  |
| MSTRG. 1562. 4  | coding    | 0. 248      | 1707  | 2034  | 2307  |
| MSTRG. 1562. 5  | coding    | 0. 13       | 600   | 891   | 1068  |
| MSTRG. 1563. 1  | coding    | 0. 368      | 156   | 789   | 1491  |
| MSTRG. 1563. 3  | coding    | 0. 36       | 138   | 714   | 4021  |
| MSTRG. 1558. 2  | noncoding | -0. 0503808 | 231   | 1413  | 1568  |
| MSTRG. 1560. 1  | noncoding | -0. 036864  | 1626  | 2025  | 2208  |
| MSTRG. 1576. 2  | coding    | 0. 269      | 114   | 1653  | 2053  |
| MSTRG. 1578. 4  | coding    | 0. 124      | 0     | 2133  | 4764  |
| MSTRG. 1578. 7  | coding    | 0. 129      | 468   | 3555  | 5253  |
| MSTRG. 1578. 9  | noncoding | -0. 0172032 | 807   | 924   | 2431  |
| MSTRG. 1578. 11 | noncoding | -0. 04096   | 7854  | 8106  | 9741  |
| MSTRG. 1578. 10 | noncoding | -0. 04096   | 3930  | 4182  | 5818  |
| MSTRG. 1578. 12 | coding    | 0. 065      | 3705  | 4773  | 11419 |
| MSTRG. 1578. 13 | coding    | 0. 01       | 10881 | 11028 | 15302 |
| MSTRG. 1578. 14 | noncoding | -0. 0602112 | 5856  | 6156  | 6310  |
| MSTRG. 1567. 3  | coding    | 0. 157      | 792   | 1545  | 2045  |
| MSTRG. 1567. 4  | coding    | 0. 157      | 717   | 1470  | 1952  |
| MSTRG. 1567. 5  | coding    | 0. 124      | 408   | 1140  | 1662  |
| MSTRG. 1567. 7  | noncoding | -0. 028672  | 3     | 114   | 2342  |
| MSTRG. 1568. 2  | coding    | 0. 33       | 123   | 1335  | 2314  |
| MSTRG. 1568. 4  | coding    | 0. 335      | 66    | 1308  | 2289  |
| MSTRG. 1568. 6  | coding    | 0. 4        | 0     | 1638  | 2618  |
| MSTRG. 1568. 5  | coding    | 0. 391      | 0     | 1740  | 2719  |
| MSTRG. 1573. 1  | noncoding | -0. 053248  | 3780  | 4023  | 4177  |
| MSTRG. 1574. 2  | coding    | 0. 085      | 0     | 372   | 1227  |
| MSTRG. 1574. 3  | coding    | 0. 085      | 0     | 372   | 2708  |
| MSTRG. 1589. 1  | noncoding | -0. 0782336 | 0     | 480   | 693   |

|                |           |             |      |       |       |
|----------------|-----------|-------------|------|-------|-------|
| MSTRG. 1590. 1 | noncoding | -0. 0319488 | 72   | 711   | 1556  |
| MSTRG. 1592. 2 | coding    | 0. 33       | 549  | 1626  | 5648  |
| MSTRG. 1592. 1 | coding    | 0. 298      | 3015 | 4431  | 8452  |
| MSTRG. 1592. 4 | coding    | 0. 095      | 552  | 825   | 2086  |
| MSTRG. 1592. 5 | coding    | 0. 129      | 702  | 1338  | 2898  |
| MSTRG. 1592. 6 | coding    | 0. 129      | 378  | 1014  | 1956  |
| MSTRG. 1593. 1 | noncoding | -0. 012288  | 0    | 210   | 698   |
| MSTRG. 1592. 7 | noncoding | -0. 065536  | 111  | 294   | 2751  |
| MSTRG. 1592. 8 | noncoding | -0. 0294912 | 60   | 192   | 1994  |
| MSTRG. 1594. 1 | coding    | 0. 067      | 585  | 1365  | 1661  |
| MSTRG. 1595. 1 | noncoding | -0. 0237568 | 1815 | 1920  | 2133  |
| MSTRG. 1596. 1 | noncoding | -0. 0004096 | 210  | 450   | 3306  |
| MSTRG. 1597. 1 | noncoding | -0. 159744  | 726  | 765   | 942   |
| MSTRG. 1598. 1 | noncoding | -0. 0462848 | 0    | 72    | 3230  |
| MSTRG. 1596. 2 | coding    | 0. 089      | 7650 | 7857  | 8377  |
| MSTRG. 1583. 1 | noncoding | -0. 0004096 | 0    | 0     | 265   |
| MSTRG. 1583. 2 | noncoding | -0. 2031616 | 0    | 27    | 360   |
| MSTRG. 1585. 1 | noncoding | -0. 0315392 | 0    | 165   | 515   |
| MSTRG. 1600. 1 | noncoding | -0. 1155072 | 0    | 69    | 365   |
| MSTRG. 1603. 1 | coding    | 0. 32       | 60   | 1056  | 1210  |
| MSTRG. 1604. 1 | noncoding | -0. 0004096 | 0    | 0     | 345   |
| MSTRG. 1606. 1 | noncoding | -0. 0380928 | 171  | 570   | 1398  |
| MSTRG. 1610. 1 | coding    | 0. 13       | 180  | 609   | 990   |
| MSTRG. 1610. 3 | coding    | 0. 133      | 1458 | 2304  | 2587  |
| MSTRG. 1610. 4 | coding    | 0. 191      | 159  | 1047  | 1328  |
| MSTRG. 1613. 3 | noncoding | -0. 0212992 | 3177 | 3333  | 6703  |
| MSTRG. 1614. 1 | noncoding | -0. 03072   | 198  | 540   | 1502  |
| MSTRG. 1614. 2 | noncoding | -0. 03072   | 198  | 540   | 1548  |
| MSTRG. 1614. 3 | coding    | 0. 16       | 0    | 909   | 1194  |
| MSTRG. 1614. 4 | coding    | 0. 082      | 870  | 2670  | 2953  |
| MSTRG. 1618. 1 | coding    | 0. 314      | 2118 | 4974  | 8654  |
| MSTRG. 1618. 2 | noncoding | -0. 032768  | 57   | 258   | 808   |
| MSTRG. 1618. 4 | coding    | 0. 376      | 0    | 1527  | 3394  |
| MSTRG. 1618. 3 | coding    | 0. 355      | 0    | 1923  | 3874  |
| MSTRG. 1619. 1 | noncoding | -0. 0647168 | 834  | 1371  | 2077  |
| MSTRG. 1619. 2 | noncoding | -0. 0397312 | 834  | 1407  | 2461  |
| MSTRG. 1623. 2 | coding    | 0. 24       | 663  | 1710  | 2107  |
| MSTRG. 1637. 4 | noncoding | -0. 012288  | 705  | 825   | 5416  |
| MSTRG. 1637. 5 | coding    | 0. 262      | 402  | 1677  | 6652  |
| MSTRG. 1632. 1 | coding    | 0. 03       | 1998 | 2550  | 6583  |
| MSTRG. 1632. 2 | coding    | 0. 03       | 1101 | 1653  | 5764  |
| MSTRG. 1644. 3 | coding    | 0. 201      | 5961 | 14190 | 14784 |
| MSTRG. 1642. 3 | coding    | 0. 046      | 786  | 1395  | 2996  |
| MSTRG. 1640. 1 | noncoding | -0. 036864  | 726  | 834   | 2030  |
| MSTRG. 1647. 3 | coding    | 0. 323      | 0    | 669   | 1893  |
| MSTRG. 1650. 1 | noncoding | -0. 0425984 | 9198 | 9996  | 10151 |
| MSTRG. 1650. 2 | noncoding | -0. 0610304 | 9177 | 9720  | 10044 |
| MSTRG. 1650. 3 | noncoding | -0. 0638976 | 9144 | 9627  | 9992  |
| MSTRG. 1653. 1 | coding    | 0. 222      | 0    | 813   | 3005  |
| MSTRG. 1654. 1 | coding    | 0. 216      | 48   | 720   | 3414  |
| MSTRG. 1654. 2 | coding    | 0. 214      | 48   | 717   | 3411  |
| MSTRG. 1654. 3 | coding    | 0. 215      | 243  | 966   | 3722  |
| MSTRG. 1657. 1 | noncoding | -0. 0032768 | 441  | 567   | 873   |
| MSTRG. 1659. 1 | noncoding | -0. 0770048 | 0    | 189   | 496   |

|                 |           |             |       |       |       |
|-----------------|-----------|-------------|-------|-------|-------|
| MSTRG. 1662. 1  | coding    | 0. 175      | 0     | 3207  | 13359 |
| MSTRG. 1662. 4  | coding    | 0. 183      | 3     | 3090  | 3972  |
| MSTRG. 1662. 7  | coding    | 0. 178      | 93    | 3129  | 4011  |
| MSTRG. 1662. 9  | coding    | 0. 182      | 0     | 3063  | 3889  |
| MSTRG. 1662. 10 | coding    | 0. 177      | 690   | 3777  | 4658  |
| MSTRG. 1662. 12 | coding    | 0. 175      | 45    | 2967  | 3849  |
| MSTRG. 1662. 13 | coding    | 0. 185      | 111   | 2310  | 3192  |
| MSTRG. 1663. 1  | coding    | 0. 149      | 0     | 1224  | 5349  |
| MSTRG. 1663. 5  | coding    | 0. 278      | 0     | 360   | 516   |
| MSTRG. 1663. 4  | noncoding | -0. 090112  | 1341  | 1410  | 2251  |
| MSTRG. 1663. 3  | coding    | 0. 201      | 0     | 147   | 1583  |
| MSTRG. 1665. 1  | noncoding | -0. 02048   | 0     | 66    | 4198  |
| MSTRG. 1667. 1  | noncoding | -0. 032768  | 75    | 87    | 3095  |
| MSTRG. 1671. 1  | coding    | 0. 501      | 63    | 1128  | 2883  |
| MSTRG. 1673. 5  | coding    | 0. 331      | 180   | 1542  | 5206  |
| MSTRG. 1673. 4  | coding    | 0. 289      | 0     | 2676  | 4595  |
| MSTRG. 1673. 3  | coding    | 0. 3        | 0     | 2448  | 6046  |
| MSTRG. 1675. 1  | coding    | 0. 154      | 6000  | 6258  | 8938  |
| MSTRG. 1676. 1  | noncoding | -0. 0004096 | 0     | 0     | 244   |
| MSTRG. 1677. 1  | noncoding | -0. 1703936 | 213   | 222   | 974   |
| MSTRG. 1678. 1  | noncoding | -0. 0028672 | 0     | 96    | 288   |
| MSTRG. 1681. 1  | coding    | 0. 115      | 687   | 1374  | 1599  |
| MSTRG. 1685. 2  | coding    | 0. 179      | 336   | 1047  | 3059  |
| MSTRG. 1685. 3  | coding    | 0. 191      | 120   | 753   | 1709  |
| MSTRG. 1689. 1  | noncoding | -0. 016384  | 0     | 27    | 322   |
| MSTRG. 1691. 1  | noncoding | -0. 032768  | 1428  | 1458  | 2246  |
| MSTRG. 1692. 1  | noncoding | -0. 0004096 | 339   | 498   | 696   |
| MSTRG. 1697. 2  | noncoding | -0. 0466944 | 141   | 342   | 2098  |
| MSTRG. 1697. 1  | noncoding | -0. 06144   | 141   | 234   | 812   |
| MSTRG. 1697. 3  | coding    | 0. 154      | 5334  | 5577  | 6450  |
| MSTRG. 1697. 4  | noncoding | -0. 0761856 | 0     | 162   | 1056  |
| MSTRG. 1709. 2  | coding    | 0. 045      | 2400  | 3165  | 4127  |
| MSTRG. 1709. 4  | coding    | 0. 045      | 2574  | 3339  | 4327  |
| MSTRG. 1709. 6  | coding    | 0. 045      | 2580  | 3345  | 3986  |
| MSTRG. 1709. 8  | coding    | 0. 071      | 1269  | 1548  | 3246  |
| MSTRG. 1716. 2  | coding    | 0. 078      | 807   | 1095  | 1647  |
| MSTRG. 1716. 1  | coding    | 0. 041      | 453   | 924   | 1475  |
| MSTRG. 1716. 3  | coding    | 0. 041      | 324   | 795   | 1110  |
| MSTRG. 1717. 1  | coding    | 0. 097      | 372   | 618   | 1816  |
| MSTRG. 1725. 1  | coding    | 0. 079      | 498   | 699   | 4991  |
| MSTRG. 1726. 1  | noncoding | -0. 0446464 | 4641  | 5136  | 5290  |
| MSTRG. 1721. 1  | noncoding | -0. 0004096 | 0     | 0     | 321   |
| MSTRG. 1721. 2  | noncoding | -0. 0954368 | 0     | 3     | 395   |
| MSTRG. 1729. 2  | noncoding | -0. 0004096 | 255   | 393   | 1897  |
| MSTRG. 1730. 1  | coding    | 0. 176      | 4056  | 4440  | 6301  |
| MSTRG. 1731. 1  | noncoding | -0. 086016  | 1431  | 1509  | 1819  |
| MSTRG. 1734. 1  | noncoding | -0. 0258048 | 2997  | 3084  | 5731  |
| MSTRG. 1734. 2  | noncoding | -0. 0139264 | 105   | 234   | 1688  |
| MSTRG. 1727. 1  | noncoding | -0. 0512    | 1575  | 1728  | 10124 |
| MSTRG. 1727. 2  | noncoding | -0. 053248  | 567   | 651   | 894   |
| MSTRG. 1740. 3  | coding    | 0. 119      | 297   | 1389  | 2155  |
| MSTRG. 1740. 2  | coding    | 0. 127      | 588   | 1212  | 1977  |
| MSTRG. 1745. 1  | coding    | 0. 083      | 16800 | 17361 | 20894 |
| MSTRG. 1745. 3  | coding    | 0. 064      | 0     | 1263  | 20967 |

|                |           |             |      |       |       |
|----------------|-----------|-------------|------|-------|-------|
| MSTRG. 1753. 1 | noncoding | -0. 0708608 | 108  | 120   | 391   |
| MSTRG. 1753. 2 | noncoding | -0. 1306624 | 120  | 144   | 458   |
| MSTRG. 1768. 1 | noncoding | -0. 028672  | 117  | 234   | 1135  |
| MSTRG. 1768. 2 | noncoding | -0. 028672  | 552  | 669   | 1541  |
| MSTRG. 1768. 3 | noncoding | -0. 1429504 | 0    | 60    | 1370  |
| MSTRG. 1770. 2 | coding    | 0. 386      | 30   | 342   | 624   |
| MSTRG. 1772. 1 | noncoding | -0. 0483328 | 3366 | 3786  | 4283  |
| MSTRG. 1772. 3 | noncoding | -0. 038912  | 3225 | 3627  | 3975  |
| MSTRG. 1772. 4 | coding    | 0. 072      | 714  | 936   | 1532  |
| MSTRG. 1773. 1 | noncoding | -0. 059392  | 117  | 318   | 474   |
| MSTRG. 1774. 1 | noncoding | -0. 0602112 | 30   | 45    | 227   |
| MSTRG. 1777. 2 | coding    | 0. 109      | 120  | 1497  | 1734  |
| MSTRG. 1777. 3 | coding    | 0. 09       | 114  | 1449  | 2956  |
| MSTRG. 1782. 1 | coding    | 0. 12       | 468  | 4152  | 5481  |
| MSTRG. 1782. 5 | coding    | 0. 095      | 627  | 3780  | 4910  |
| MSTRG. 1782. 4 | coding    | 0. 125      | 0    | 2640  | 6376  |
| MSTRG. 1783. 1 | noncoding | -0. 0475136 | 1686 | 1767  | 6921  |
| MSTRG. 1784. 1 | noncoding | -0. 0483328 | 5226 | 5472  | 11439 |
| MSTRG. 1787. 1 | noncoding | -0. 0004096 | 0    | 0     | 506   |
| MSTRG. 1787. 2 | noncoding | -0. 0004096 | 0    | 0     | 499   |
| MSTRG. 1779. 1 | noncoding | -0. 0004096 | 150  | 150   | 401   |
| MSTRG. 1780. 1 | noncoding | -0. 0221184 | 1431 | 1749  | 1963  |
| MSTRG. 1791. 2 | coding    | 0. 041      | 384  | 924   | 2074  |
| MSTRG. 1791. 3 | coding    | 0. 544      | 0    | 264   | 1980  |
| MSTRG. 1798. 1 | noncoding | -0. 012288  | 1275 | 1377  | 4198  |
| MSTRG. 1799. 1 | coding    | 0. 051      | 108  | 615   | 5681  |
| MSTRG. 1799. 2 | noncoding | -0. 0765952 | 3285 | 3720  | 3875  |
| MSTRG. 1799. 3 | coding    | 0. 067      | 0    | 519   | 2052  |
| MSTRG. 1799. 4 | coding    | 0. 066      | 219  | 723   | 1095  |
| MSTRG. 1799. 7 | noncoding | -0. 0098304 | 2040 | 2193  | 2938  |
| MSTRG. 1799. 6 | coding    | 0. 124      | 0    | 678   | 1423  |
| MSTRG. 1798. 2 | noncoding | -0. 012288  | 2043 | 2145  | 4969  |
| MSTRG. 1798. 3 | noncoding | -0. 045056  | 2523 | 2607  | 10417 |
| MSTRG. 1799. 8 | noncoding | -0. 088064  | 0    | 339   | 4560  |
| MSTRG. 1805. 1 | coding    | 0. 197      | 573  | 1182  | 3623  |
| MSTRG. 1805. 3 | coding    | 0. 11       | 306  | 1362  | 2674  |
| MSTRG. 1801. 1 | noncoding | -0. 0237568 | 402  | 459   | 616   |
| MSTRG. 1801. 2 | noncoding | -0. 0237568 | 366  | 423   | 580   |
| MSTRG. 1801. 3 | noncoding | -0. 372736  | 207  | 213   | 1731  |
| MSTRG. 1804. 1 | coding    | 0. 18       | 165  | 1683  | 1837  |
| MSTRG. 1819. 1 | noncoding | -0. 0741376 | 0    | 67068 | 68416 |
| MSTRG. 1811. 3 | coding    | 0. 001      | 522  | 711   | 1003  |
| MSTRG. 1814. 1 | coding    | 0. 144      | 297  | 2949  | 7597  |
| MSTRG. 1814. 3 | coding    | 0. 144      | 375  | 3027  | 4405  |
| MSTRG. 1814. 4 | coding    | 0. 144      | 471  | 3123  | 4501  |
| MSTRG. 1814. 2 | coding    | 0. 144      | 555  | 3207  | 4586  |
| MSTRG. 1814. 7 | coding    | 0. 144      | 1611 | 4263  | 5234  |
| MSTRG. 1814. 8 | noncoding | -3. 80928   | 1161 | 1350  | 1507  |
| MSTRG. 1818. 1 | coding    | 0. 262      | 0    | 897   | 4596  |
| MSTRG. 1818. 3 | coding    | 0. 261      | 0    | 900   | 4599  |
| MSTRG. 1832. 1 | coding    | 0. 039      | 333  | 546   | 7304  |
| MSTRG. 1832. 3 | coding    | 0. 013      | 408  | 939   | 2076  |
| MSTRG. 1833. 2 | noncoding | -0. 1032192 | 0    | 147   | 2442  |
| MSTRG. 1833. 1 | noncoding | -0. 045056  | 888  | 990   | 1146  |

|                 |           |             |       |       |       |
|-----------------|-----------|-------------|-------|-------|-------|
| MSTRG. 1833. 3  | noncoding | -0. 0188416 | 1350  | 1503  | 1660  |
| MSTRG. 1834. 1  | noncoding | -0. 014336  | 513   | 588   | 3092  |
| MSTRG. 1840. 1  | noncoding | -0. 1155072 | 0     | 288   | 1429  |
| MSTRG. 1829. 1  | noncoding | -0. 032768  | 3054  | 3156  | 3310  |
| MSTRG. 1841. 5  | coding    | 0. 043      | 342   | 786   | 940   |
| MSTRG. 1847. 1  | coding    | 0. 147      | 1233  | 1467  | 2215  |
| MSTRG. 1847. 2  | noncoding | -0. 0303104 | 2553  | 2754  | 3565  |
| MSTRG. 1869. 1  | noncoding | -0. 012288  | 3297  | 3411  | 3871  |
| MSTRG. 1868. 11 | noncoding | -0. 028672  | 29379 | 29547 | 35981 |
| MSTRG. 1868. 12 | noncoding | -0. 008192  | 177   | 309   | 7977  |
| MSTRG. 1868. 13 | noncoding | -0. 0049152 | 2058  | 2127  | 2349  |
| MSTRG. 1873. 1  | noncoding | -0. 0692224 | 918   | 921   | 1407  |
| MSTRG. 1874. 1  | noncoding | -0. 0036864 | 7773  | 7920  | 34390 |
| MSTRG. 1874. 2  | noncoding | -0. 0155648 | 639   | 882   | 16937 |
| MSTRG. 1849. 4  | coding    | 0. 025      | 459   | 1665  | 2149  |
| MSTRG. 1850. 1  | noncoding | -0. 004096  | 1854  | 2040  | 2928  |
| MSTRG. 1856. 4  | coding    | 0. 081      | 1656  | 2106  | 3473  |
| MSTRG. 1857. 1  | coding    | 0. 034      | 480   | 1602  | 6096  |
| MSTRG. 1860. 1  | coding    | 0. 057      | 84    | 1071  | 1638  |
| MSTRG. 1860. 5  | noncoding | -0. 0167936 | 6711  | 6864  | 7782  |
| MSTRG. 1860. 6  | noncoding | -0. 0278528 | 0     | 162   | 3087  |
| MSTRG. 1860. 3  | coding    | 0. 057      | 657   | 1644  | 2209  |
| MSTRG. 1860. 4  | coding    | 0. 044      | 0     | 1446  | 2013  |
| MSTRG. 1862. 1  | noncoding | -0. 057344  | 336   | 417   | 583   |
| MSTRG. 1860. 7  | coding    | 0. 045      | 5070  | 5757  | 6323  |
| MSTRG. 1864. 1  | noncoding | -0. 0004096 | 1545  | 1545  | 2720  |
| MSTRG. 1865. 1  | noncoding | -0. 106496  | 1017  | 1110  | 1854  |
| MSTRG. 1866. 1  | noncoding | -0. 0417792 | 339   | 528   | 9772  |
| MSTRG. 1867. 2  | noncoding | -0. 0569344 | 2988  | 3678  | 3832  |
| MSTRG. 1867. 3  | noncoding | -0. 0544768 | 3111  | 3732  | 3887  |
| MSTRG. 1891. 2  | coding    | 0. 113      | 0     | 1377  | 6858  |
| MSTRG. 1895. 2  | coding    | 0. 173      | 0     | 1002  | 5378  |
| MSTRG. 1895. 3  | noncoding | -0. 0077824 | 246   | 396   | 551   |
| MSTRG. 1895. 5  | coding    | 0. 138      | 1041  | 1299  | 1454  |
| MSTRG. 1895. 4  | coding    | 0. 16       | 0     | 900   | 1542  |
| MSTRG. 1900. 3  | coding    | 0. 052      | 0     | 1449  | 1825  |
| MSTRG. 1900. 4  | coding    | 0. 031      | 357   | 1548  | 1924  |
| MSTRG. 1900. 5  | coding    | 0. 059      | 0     | 1173  | 1481  |
| MSTRG. 1900. 6  | noncoding | -0. 016384  | 0     | 75    | 1189  |
| MSTRG. 1902. 4  | coding    | 0. 081      | 105   | 2025  | 2255  |
| MSTRG. 1906. 1  | noncoding | -0. 024576  | 543   | 654   | 1615  |
| MSTRG. 1907. 2  | coding    | 0. 065      | 465   | 1365  | 3629  |
| MSTRG. 1907. 3  | coding    | 0. 083      | 402   | 1374  | 3639  |
| MSTRG. 1907. 4  | coding    | 0. 083      | 432   | 1404  | 3563  |
| MSTRG. 1911. 1  | noncoding | -0. 045056  | 0     | 180   | 626   |
| MSTRG. 1912. 2  | noncoding | -0. 0438272 | 3093  | 3699  | 3853  |
| MSTRG. 1912. 4  | noncoding | -0. 0360448 | 768   | 987   | 1143  |
| MSTRG. 1912. 7  | noncoding | -0. 0360448 | 6672  | 6891  | 7046  |
| MSTRG. 1914. 1  | noncoding | -0. 0004096 | 603   | 747   | 1316  |
| MSTRG. 1912. 8  | noncoding | -0. 02048   | 477   | 504   | 1807  |
| MSTRG. 1912. 9  | coding    | 0. 032      | 2841  | 3588  | 6839  |
| MSTRG. 1909. 2  | coding    | 0. 084      | 243   | 1452  | 2261  |
| MSTRG. 1910. 1  | noncoding | -0. 0421888 | 63    | 201   | 625   |
| MSTRG. 1922. 1  | coding    | 0. 225      | 99    | 681   | 934   |



|                 |           |             |       |       |       |
|-----------------|-----------|-------------|-------|-------|-------|
| MSTRG. 1922. 4  | coding    | 0. 192      | 1104  | 1479  | 1635  |
| MSTRG. 1922. 6  | coding    | 0. 192      | 1107  | 1482  | 1639  |
| MSTRG. 1922. 5  | coding    | 0. 129      | 93    | 861   | 1018  |
| MSTRG. 1923. 1  | noncoding | -0. 016384  | 87    | 138   | 346   |
| MSTRG. 1924. 1  | noncoding | -0. 0004096 | 39    | 186   | 938   |
| MSTRG. 1924. 2  | noncoding | -0. 0094208 | 123   | 228   | 796   |
| MSTRG. 1928. 3  | coding    | 0. 144      | 303   | 3375  | 5115  |
| MSTRG. 1928. 5  | coding    | 0. 144      | 222   | 3294  | 5122  |
| MSTRG. 1928. 7  | coding    | 0. 176      | 1053  | 3249  | 4930  |
| MSTRG. 1928. 8  | noncoding | -0. 045056  | 294   | 345   | 1421  |
| MSTRG. 1928. 9  | coding    | 0. 21       | 1569  | 2574  | 3890  |
| MSTRG. 1928. 10 | noncoding | -0. 01024   | 4065  | 4215  | 7864  |
| MSTRG. 1930. 1  | noncoding | -0. 004096  | 4725  | 4860  | 7548  |
| MSTRG. 1928. 11 | noncoding | -0. 0004096 | 255   | 354   | 4852  |
| MSTRG. 1928. 12 | noncoding | -0. 0622592 | 11697 | 11889 | 17946 |
| MSTRG. 1928. 13 | noncoding | -0. 0622592 | 10119 | 10311 | 10750 |
| MSTRG. 1920. 4  | coding    | 0. 497      | 0     | 540   | 7991  |
| MSTRG. 1920. 5  | coding    | 0. 497      | 0     | 540   | 7974  |
| MSTRG. 1920. 6  | noncoding | -0. 008192  | 1746  | 1875  | 4192  |
| MSTRG. 1920. 7  | coding    | 0. 497      | 0     | 540   | 6852  |
| MSTRG. 1921. 1  | noncoding | -0. 0233472 | 309   | 414   | 3176  |
| MSTRG. 1918. 3  | coding    | 0. 002      | 792   | 1326  | 2545  |
| MSTRG. 1940. 1  | coding    | 0. 053      | 729   | 927   | 10100 |
| MSTRG. 1940. 2  | coding    | 0. 111      | 1017  | 1656  | 9950  |
| MSTRG. 1940. 5  | coding    | 0. 045      | 4476  | 4803  | 6731  |
| MSTRG. 1940. 4  | coding    | 0. 107      | 4494  | 4929  | 6856  |
| MSTRG. 1941. 1  | noncoding | -0. 0212992 | 3876  | 4071  | 8733  |
| MSTRG. 1943. 1  | coding    | 0. 113      | 3291  | 3525  | 3704  |
| MSTRG. 1943. 2  | noncoding | -0. 0249856 | 1083  | 1203  | 1891  |
| MSTRG. 1943. 4  | noncoding | -0. 0544768 | 0     | 144   | 1308  |
| MSTRG. 1945. 2  | coding    | 0. 131      | 0     | 585   | 1047  |
| MSTRG. 1948. 1  | noncoding | -0. 0004096 | 0     | 0     | 1342  |
| MSTRG. 1949. 1  | noncoding | -0. 04096   | 960   | 1035  | 1361  |
| MSTRG. 1951. 1  | coding    | 0. 144      | 633   | 2640  | 3042  |
| MSTRG. 1934. 1  | coding    | 0. 124      | 69    | 13989 | 15307 |
| MSTRG. 1953. 1  | noncoding | -0. 0090112 | 2073  | 2292  | 2578  |
| MSTRG. 1954. 1  | noncoding | -0. 0315392 | 3516  | 3846  | 4334  |
| MSTRG. 1995. 1  | noncoding | -0. 094208  | 2457  | 2586  | 3928  |
| MSTRG. 2012. 1  | noncoding | -0. 016384  | 1479  | 1551  | 3912  |
| MSTRG. 2013. 1  | noncoding | -0. 045056  | 72    | 144   | 371   |
| MSTRG. 2022. 1  | noncoding | -0. 139264  | 2979  | 3021  | 3387  |
| MSTRG. 2023. 1  | noncoding | -0. 0417792 | 7506  | 7674  | 10824 |
| MSTRG. 2023. 2  | noncoding | -0. 0417792 | 4443  | 4611  | 5156  |
| MSTRG. 2025. 1  | noncoding | -0. 229376  | 2709  | 2736  | 3127  |
| MSTRG. 2028. 1  | noncoding | -0. 008192  | 1602  | 1722  | 1877  |
| MSTRG. 1959. 1  | coding    | 0. 145      | 2160  | 4050  | 4793  |
| MSTRG. 1959. 3  | coding    | 0. 085      | 15    | 3801  | 4330  |
| MSTRG. 1960. 1  | noncoding | -0. 0954368 | 2370  | 2553  | 2707  |
| MSTRG. 1962. 1  | noncoding | -0. 0811008 | 0     | 345   | 921   |
| MSTRG. 1962. 2  | noncoding | -0. 0761856 | 0     | 339   | 738   |
| MSTRG. 1968. 3  | coding    | 0. 08       | 3     | 3237  | 5275  |
| MSTRG. 1968. 8  | coding    | 0. 092      | 0     | 3804  | 4030  |
| MSTRG. 1972. 2  | coding    | 0. 081      | 0     | 438   | 2627  |
| MSTRG. 1972. 6  | noncoding | -0. 0323584 | 1572  | 1761  | 6478  |

|                 |           |             |      |      |      |
|-----------------|-----------|-------------|------|------|------|
| MSTRG. 1972. 4  | noncoding | -0. 008192  | 2055 | 2238 | 2498 |
| MSTRG. 1972. 3  | coding    | 0. 058      | 201  | 453  | 1845 |
| MSTRG. 1972. 8  | noncoding | -0. 008192  | 2001 | 2184 | 2408 |
| MSTRG. 1972. 10 | coding    | 0. 058      | 99   | 351  | 1536 |
| MSTRG. 1972. 9  | noncoding | -0. 0323584 | 1572 | 1761 | 6594 |
| MSTRG. 1972. 11 | noncoding | -0. 008192  | 1515 | 1698 | 1859 |
| MSTRG. 1970. 1  | noncoding | -0. 0004096 | 0    | 0    | 222  |
| MSTRG. 1989. 1  | noncoding | -0. 065536  | 63   | 96   | 745  |
| MSTRG. 1989. 2  | noncoding | -0. 065536  | 3    | 36   | 500  |
| MSTRG. 1990. 1  | noncoding | -0. 006144  | 213  | 261  | 558  |
| MSTRG. 2059. 1  | noncoding | -0. 08192   | 93   | 123  | 629  |
| MSTRG. 2062. 3  | coding    | 0. 025      | 921  | 1257 | 1854 |
| MSTRG. 2062. 4  | coding    | 0. 025      | 4182 | 4518 | 5070 |
| MSTRG. 2062. 6  | coding    | 0. 099      | 2901 | 3198 | 4410 |
| MSTRG. 2062. 5  | noncoding | -0. 04096   | 51   | 387  | 2511 |
| MSTRG. 2063. 1  | noncoding | -0. 077824  | 2046 | 2121 | 3876 |
| MSTRG. 2060. 1  | noncoding | -0. 016384  | 0    | 48   | 400  |
| MSTRG. 2068. 4  | coding    | 0. 066      | 153  | 1203 | 1525 |
| MSTRG. 2068. 5  | coding    | 0. 068      | 144  | 1185 | 1604 |
| MSTRG. 2068. 6  | coding    | 0. 073      | 0    | 1053 | 1471 |
| MSTRG. 2068. 7  | coding    | 0. 141      | 0    | 1344 | 1762 |
| MSTRG. 2068. 9  | coding    | 0. 144      | 0    | 1335 | 1753 |
| MSTRG. 2068. 8  | coding    | 0. 142      | 0    | 1332 | 4016 |
| MSTRG. 2070. 1  | noncoding | -0. 1052672 | 198  | 201  | 368  |
| MSTRG. 2071. 1  | coding    | 0. 086      | 1059 | 1272 | 2108 |
| MSTRG. 2067. 1  | noncoding | -0. 135168  | 0    | 24   | 243  |
| MSTRG. 2067. 2  | noncoding | -0. 1753088 | 0    | 138  | 325  |
| MSTRG. 2066. 1  | noncoding | -0. 0598016 | 0    | 177  | 647  |
| MSTRG. 2072. 2  | coding    | 0. 168      | 0    | 1539 | 2205 |
| MSTRG. 2079. 1  | noncoding | -0. 0229376 | 0    | 159  | 3616 |
| MSTRG. 2079. 2  | noncoding | -0. 14336   | 345  | 363  | 706  |
| MSTRG. 2085. 1  | coding    | 0. 136      | 54   | 315  | 1067 |
| MSTRG. 2085. 2  | coding    | 0. 136      | 738  | 999  | 2137 |
| MSTRG. 2086. 1  | noncoding | -0. 0004096 | 0    | 0    | 311  |
| MSTRG. 2088. 6  | coding    | 0. 056      | 1803 | 2106 | 2335 |
| MSTRG. 2088. 4  | coding    | 0. 056      | 2490 | 2793 | 3021 |
| MSTRG. 2088. 5  | coding    | 0. 056      | 1881 | 2184 | 2412 |
| MSTRG. 2088. 8  | coding    | 0. 103      | 3117 | 3363 | 3585 |
| MSTRG. 2083. 1  | noncoding | -0. 0385024 | 6081 | 6264 | 7792 |
| MSTRG. 2095. 1  | coding    | 0. 044      | 912  | 1893 | 5285 |
| MSTRG. 2095. 2  | coding    | 0. 209      | 0    | 141  | 1006 |
| MSTRG. 2098. 1  | noncoding | -0. 0004096 | 390  | 513  | 2846 |
| MSTRG. 2097. 6  | coding    | 0. 07       | 1020 | 6705 | 8174 |
| MSTRG. 2097. 7  | coding    | 0. 109      | 735  | 4113 | 5707 |
| MSTRG. 2097. 8  | coding    | 0. 106      | 735  | 4188 | 6896 |
| MSTRG. 2110. 8  | coding    | 0. 199      | 972  | 3621 | 4183 |
| MSTRG. 2110. 1  | coding    | 0. 179      | 0    | 3246 | 3808 |
| MSTRG. 2110. 5  | coding    | 0. 179      | 0    | 3243 | 3805 |
| MSTRG. 2111. 1  | noncoding | -0. 004096  | 990  | 1131 | 1872 |
| MSTRG. 2110. 9  | coding    | 0. 187      | 0    | 333  | 1546 |
| MSTRG. 2112. 1  | noncoding | -0. 282624  | 162  | 189  | 751  |
| MSTRG. 2113. 1  | noncoding | -0. 02048   | 540  | 645  | 1749 |
| MSTRG. 2114. 1  | coding    | 0. 085      | 954  | 2124 | 2395 |
| MSTRG. 2116. 1  | noncoding | -0. 024576  | 684  | 726  | 1198 |

|                 |           |             |       |       |       |
|-----------------|-----------|-------------|-------|-------|-------|
| MSTRG. 2114. 2  | coding    | 0. 085      | 945   | 2115  | 2385  |
| MSTRG. 2108. 1  | noncoding | -0. 016384  | 279   | 414   | 570   |
| MSTRG. 2119. 3  | coding    | 0. 196      | 1116  | 3153  | 4434  |
| MSTRG. 2118. 1  | coding    | 0. 279      | 0     | 87    | 242   |
| MSTRG. 2126. 1  | coding    | 0. 076      | 39    | 252   | 406   |
| MSTRG. 2148. 1  | coding    | 0. 085      | 981   | 1140  | 1296  |
| MSTRG. 2152. 1  | noncoding | -0. 018432  | 264   | 342   | 910   |
| MSTRG. 2154. 1  | noncoding | -0. 1384448 | 0     | 90    | 2752  |
| MSTRG. 2153. 6  | noncoding | -0. 008192  | 2745  | 2889  | 5155  |
| MSTRG. 2153. 3  | noncoding | -0. 0643072 | 0     | 75    | 1857  |
| MSTRG. 2153. 5  | noncoding | -0. 0643072 | 0     | 78    | 1836  |
| MSTRG. 2153. 4  | noncoding | -0. 0843776 | 774   | 1413  | 3044  |
| MSTRG. 2153. 7  | coding    | 0. 196      | 438   | 1185  | 2620  |
| MSTRG. 2155. 1  | coding    | 0. 064      | 498   | 3183  | 4273  |
| MSTRG. 2155. 2  | coding    | 0. 068      | 801   | 3522  | 4613  |
| MSTRG. 2155. 3  | coding    | 0. 071      | 267   | 2607  | 3697  |
| MSTRG. 2155. 4  | coding    | 0. 065      | 279   | 3015  | 4106  |
| MSTRG. 2155. 7  | noncoding | -0. 0147456 | 285   | 573   | 729   |
| MSTRG. 2155. 8  | coding    | 0. 22       | 549   | 789   | 1625  |
| MSTRG. 2155. 9  | coding    | 0. 07       | 1227  | 1551  | 1982  |
| MSTRG. 2144. 1  | noncoding | -0. 012288  | 381   | 516   | 958   |
| MSTRG. 2145. 1  | noncoding | -0. 0004096 | 429   | 543   | 998   |
| MSTRG. 2146. 1  | noncoding | -0. 0270336 | 9393  | 9624  | 11452 |
| MSTRG. 2146. 2  | noncoding | -0. 0270336 | 18321 | 18552 | 20377 |
| MSTRG. 2175. 1  | coding    | 0. 324      | 255   | 18666 | 18820 |
| MSTRG. 2175. 2  | coding    | 0. 329      | 75    | 4605  | 4765  |
| MSTRG. 2177. 2  | coding    | 0. 051      | 3129  | 6474  | 8891  |
| MSTRG. 2177. 1  | coding    | 0. 051      | 3165  | 6510  | 9062  |
| MSTRG. 2177. 6  | coding    | 0. 051      | 3126  | 6471  | 11614 |
| MSTRG. 2177. 4  | coding    | 0. 051      | 3165  | 6510  | 10896 |
| MSTRG. 2177. 7  | coding    | 0. 051      | 3123  | 6468  | 15564 |
| MSTRG. 2177. 8  | coding    | 0. 051      | 3138  | 6483  | 8421  |
| MSTRG. 2177. 10 | coding    | 0. 051      | 3498  | 6843  | 11306 |
| MSTRG. 2177. 12 | coding    | 0. 051      | 1971  | 5316  | 9858  |
| MSTRG. 2177. 11 | coding    | 0. 051      | 3066  | 6411  | 10874 |
| MSTRG. 2157. 1  | coding    | 0. 158      | 210   | 1200  | 1520  |
| MSTRG. 2166. 1  | noncoding | -0. 016384  | 432   | 504   | 752   |
| MSTRG. 2167. 1  | noncoding | -0. 028672  | 123   | 141   | 385   |
| MSTRG. 2179. 2  | coding    | 0. 46       | 78    | 2223  | 6115  |
| MSTRG. 2179. 3  | coding    | 0. 46       | 54    | 2199  | 2781  |
| MSTRG. 2179. 4  | coding    | 0. 514      | 768   | 1965  | 5771  |
| MSTRG. 2200. 2  | coding    | 0. 095      | 4248  | 6162  | 6842  |
| MSTRG. 2200. 3  | coding    | 0. 095      | 3891  | 5805  | 6484  |
| MSTRG. 2200. 5  | coding    | 0. 081      | 4140  | 6123  | 6527  |
| MSTRG. 2201. 1  | noncoding | -0. 016384  | 1722  | 1848  | 2333  |
| MSTRG. 2202. 1  | noncoding | -0. 077824  | 657   | 744   | 1955  |
| MSTRG. 2203. 1  | coding    | 0. 066      | 2577  | 2775  | 3579  |
| MSTRG. 2210. 3  | noncoding | -0. 012288  | 3747  | 3831  | 6201  |
| MSTRG. 2211. 1  | noncoding | -0. 0008192 | 1056  | 1116  | 4060  |
| MSTRG. 2210. 4  | noncoding | -0. 0212992 | 3456  | 3537  | 8054  |
| MSTRG. 2212. 1  | coding    | 0. 099      | 5526  | 6267  | 6762  |
| MSTRG. 2213. 3  | coding    | 0. 096      | 2139  | 2361  | 3989  |
| MSTRG. 2196. 1  | noncoding | -0. 0004096 | 0     | 0     | 467   |
| MSTRG. 2219. 1  | noncoding | -0. 0110592 | 4992  | 5190  | 9913  |

|                |           |             |       |       |       |
|----------------|-----------|-------------|-------|-------|-------|
| MSTRG. 2220. 2 | coding    | 0. 195      | 1320  | 4905  | 6033  |
| MSTRG. 2221. 1 | noncoding | -0. 008192  | 17460 | 17592 | 17829 |
| MSTRG. 2221. 2 | noncoding | -0. 090112  | 339   | 423   | 981   |
| MSTRG. 2222. 1 | noncoding | -0. 0086016 | 10608 | 10728 | 12317 |
| MSTRG. 2222. 2 | noncoding | -0. 0086016 | 5283  | 5403  | 6978  |
| MSTRG. 2220. 3 | coding    | 0. 144      | 2490  | 5640  | 7010  |
| MSTRG. 2220. 4 | coding    | 0. 101      | 189   | 2628  | 4190  |
| MSTRG. 2223. 3 | noncoding | -0. 602112  | 612   | 630   | 787   |
| MSTRG. 2223. 4 | coding    | 0. 092      | 3690  | 3960  | 9652  |
| MSTRG. 2223. 5 | noncoding | -0. 008192  | 5829  | 6000  | 6259  |
| MSTRG. 2223. 6 | coding    | 0. 092      | 780   | 1050  | 5490  |
| MSTRG. 2224. 1 | noncoding | -0. 004096  | 546   | 576   | 2448  |
| MSTRG. 2225. 1 | noncoding | -0. 0192512 | 270   | 486   | 1188  |
| MSTRG. 2230. 1 | noncoding | -0. 0524288 | 333   | 396   | 774   |
| MSTRG. 2240. 1 | noncoding | -0. 0004096 | 0     | 0     | 216   |
| MSTRG. 2241. 1 | noncoding | -0. 114688  | 540   | 543   | 884   |
| MSTRG. 2248. 2 | coding    | 0. 061      | 945   | 1380  | 1849  |
| MSTRG. 2248. 4 | coding    | 0. 061      | 945   | 1380  | 3828  |
| MSTRG. 2248. 6 | coding    | 0. 1        | 1065  | 1389  | 1641  |
| MSTRG. 2250. 1 | noncoding | -0. 0045056 | 0     | 96    | 885   |
| MSTRG. 2252. 1 | coding    | 0. 038      | 609   | 2370  | 2612  |
| MSTRG. 2257. 2 | coding    | 0. 33       | 750   | 1695  | 2372  |
| MSTRG. 2257. 3 | coding    | 0. 321      | 270   | 1380  | 2058  |
| MSTRG. 2265. 1 | noncoding | -0. 0479232 | 3177  | 3489  | 6939  |
| MSTRG. 2265. 2 | coding    | 0. 097      | 1557  | 1833  | 3522  |
| MSTRG. 2265. 3 | noncoding | -0. 0479232 | 6072  | 6384  | 9834  |
| MSTRG. 2265. 4 | coding    | 0. 097      | 636   | 912   | 2553  |
| MSTRG. 2265. 6 | noncoding | -0. 0479232 | 2901  | 3213  | 3865  |
| MSTRG. 2265. 5 | coding    | 0. 097      | 3834  | 4110  | 5727  |
| MSTRG. 2262. 2 | noncoding | -0. 0946176 | 0     | 519   | 2777  |
| MSTRG. 2268. 4 | coding    | 0. 073      | 423   | 2967  | 3906  |
| MSTRG. 2268. 3 | coding    | 0. 067      | 390   | 3366  | 4306  |
| MSTRG. 2268. 5 | coding    | 0. 071      | 1002  | 3498  | 4439  |
| MSTRG. 2269. 1 | noncoding | -0. 08192   | 1701  | 1806  | 2404  |
| MSTRG. 2273. 1 | noncoding | -0. 0016384 | 243   | 462   | 706   |
| MSTRG. 2278. 1 | noncoding | -0. 114688  | 504   | 618   | 1907  |
| MSTRG. 2280. 1 | coding    | 0. 096      | 0     | 2796  | 6410  |
| MSTRG. 2281. 1 | noncoding | -0. 008192  | 93    | 234   | 2766  |
| MSTRG. 2282. 1 | noncoding | -0. 053248  | 357   | 402   | 558   |
| MSTRG. 2283. 1 | noncoding | -0. 036864  | 1206  | 1362  | 2458  |
| MSTRG. 2284. 1 | coding    | 0. 069      | 1239  | 1464  | 3430  |
| MSTRG. 2270. 4 | coding    | 0. 073      | 1968  | 2577  | 5619  |
| MSTRG. 2270. 5 | coding    | 0. 073      | 2385  | 2994  | 6037  |
| MSTRG. 2288. 1 | coding    | 0. 262      | 0     | 2109  | 7913  |
| MSTRG. 2288. 3 | coding    | 0. 224      | 516   | 2457  | 8256  |
| MSTRG. 2289. 1 | noncoding | -0. 0069632 | 3753  | 3885  | 7857  |
| MSTRG. 2285. 1 | noncoding | -0. 04096   | 126   | 198   | 405   |
| MSTRG. 2311. 1 | noncoding | -0. 0004096 | 0     | 0     | 453   |
| MSTRG. 2350. 1 | coding    | 0. 328      | 81    | 1053  | 1445  |
| MSTRG. 2352. 2 | coding    | 0. 157      | 1257  | 3372  | 3569  |
| MSTRG. 2352. 3 | coding    | 0. 241      | 786   | 2028  | 2279  |
| MSTRG. 2352. 4 | coding    | 0. 238      | 786   | 1935  | 2186  |
| MSTRG. 2355. 1 | noncoding | -0. 002048  | 21    | 246   | 418   |
| MSTRG. 2361. 1 | coding    | 0. 107      | 1659  | 3057  | 5682  |

|                 |           |             |       |       |       |
|-----------------|-----------|-------------|-------|-------|-------|
| MSTRG. 2361. 2  | coding    | 0. 107      | 1503  | 2901  | 6918  |
| MSTRG. 2361. 4  | coding    | 0. 107      | 960   | 2358  | 7441  |
| MSTRG. 2361. 5  | coding    | 0. 109      | 1059  | 2535  | 10589 |
| MSTRG. 2361. 3  | coding    | 0. 107      | 960   | 2358  | 10368 |
| MSTRG. 2362. 1  | noncoding | -0. 065536  | 408   | 471   | 1616  |
| MSTRG. 2364. 1  | coding    | 0. 278      | 0     | 480   | 6197  |
| MSTRG. 2364. 4  | coding    | 0. 113      | 0     | 1272  | 8154  |
| MSTRG. 2364. 6  | coding    | 0. 147      | 429   | 1749  | 8973  |
| MSTRG. 2365. 1  | noncoding | -0. 02048   | 693   | 801   | 2277  |
| MSTRG. 2364. 7  | coding    | 0. 116      | 2754  | 4323  | 8748  |
| MSTRG. 2364. 8  | noncoding | -0. 0069632 | 11388 | 11637 | 12542 |
| MSTRG. 2364. 9  | coding    | 0. 143      | 372   | 801   | 1331  |
| MSTRG. 2366. 1  | noncoding | -0. 004096  | 936   | 1134  | 3360  |
| MSTRG. 2364. 11 | noncoding | -0. 016384  | 5400  | 5532  | 7645  |
| MSTRG. 2371. 1  | coding    | 0. 395      | 0     | 5016  | 6802  |
| MSTRG. 2381. 1  | coding    | 0. 261      | 366   | 4764  | 7775  |
| MSTRG. 2381. 10 | coding    | 0. 262      | 420   | 4080  | 7089  |
| MSTRG. 2381. 7  | coding    | 0. 257      | 111   | 3813  | 6821  |
| MSTRG. 2381. 4  | coding    | 0. 258      | 819   | 4497  | 7506  |
| MSTRG. 2381. 6  | coding    | 0. 263      | 1128  | 4764  | 7774  |
| MSTRG. 2381. 5  | coding    | 0. 262      | 282   | 4656  | 7666  |
| MSTRG. 2381. 2  | coding    | 0. 263      | 507   | 4878  | 7886  |
| MSTRG. 2381. 3  | coding    | 0. 264      | 744   | 5091  | 8101  |
| MSTRG. 2381. 9  | coding    | 0. 261      | 981   | 5379  | 8389  |
| MSTRG. 2381. 13 | coding    | 0. 256      | 51    | 3807  | 6806  |
| MSTRG. 2381. 12 | coding    | 0. 262      | 1062  | 4776  | 7775  |
| MSTRG. 2381. 15 | coding    | 0. 256      | 750   | 4506  | 7408  |
| MSTRG. 2381. 17 | coding    | 0. 259      | 750   | 4401  | 7402  |
| MSTRG. 2381. 16 | coding    | 0. 216      | 312   | 2919  | 11949 |
| MSTRG. 2381. 14 | coding    | 0. 264      | 1071  | 5418  | 8418  |
| MSTRG. 2381. 18 | coding    | 0. 264      | 978   | 5325  | 8325  |
| MSTRG. 2381. 19 | coding    | 0. 209      | 312   | 2904  | 3846  |
| MSTRG. 2387. 1  | noncoding | -0. 0925696 | 120   | 129   | 464   |
| MSTRG. 2385. 1  | noncoding | -0. 0221184 | 87    | 216   | 444   |
| MSTRG. 2391. 1  | noncoding | -0. 0004096 | 0     | 0     | 209   |
| MSTRG. 2392. 1  | noncoding | -0. 0004096 | 81    | 81    | 275   |
| MSTRG. 2398. 5  | coding    | 0. 168      | 0     | 576   | 823   |
| MSTRG. 2412. 1  | noncoding | -0. 0086016 | 690   | 843   | 4321  |
| MSTRG. 2412. 2  | coding    | 0. 062      | 3777  | 4023  | 4315  |
| MSTRG. 2412. 3  | coding    | 0. 038      | 3396  | 4119  | 7458  |
| MSTRG. 2415. 1  | coding    | 0. 047      | 1329  | 1803  | 5963  |
| MSTRG. 2412. 4  | coding    | 0. 021      | 2751  | 2904  | 6076  |
| MSTRG. 2417. 1  | noncoding | -0. 0004096 | 1833  | 1974  | 2620  |
| MSTRG. 2417. 2  | noncoding | -0. 008192  | 1770  | 1905  | 2528  |
| MSTRG. 2418. 1  | noncoding | -0. 004096  | 4791  | 4935  | 10784 |
| MSTRG. 2419. 2  | noncoding | -0. 1097728 | 0     | 624   | 1726  |
| MSTRG. 2419. 5  | noncoding | -0. 1175552 | 450   | 963   | 1120  |
| MSTRG. 2419. 6  | noncoding | -0. 1241088 | 57    | 549   | 1767  |
| MSTRG. 2419. 4  | noncoding | -0. 1241088 | 57    | 549   | 2081  |
| MSTRG. 2403. 1  | coding    | 0. 024      | 234   | 351   | 737   |
| MSTRG. 2407. 1  | noncoding | -0. 0528384 | 0     | 12    | 737   |
| MSTRG. 2426. 1  | noncoding | -0. 049152  | 504   | 510   | 875   |
| MSTRG. 2431. 1  | noncoding | -0. 0421888 | 9     | 12    | 215   |
| MSTRG. 2433. 1  | noncoding | -0. 008192  | 0     | 33    | 278   |

|                 |           |             |      |      |       |
|-----------------|-----------|-------------|------|------|-------|
| MSTRG. 2438. 1  | noncoding | -0. 0077824 | 48   | 231  | 871   |
| MSTRG. 2439. 4  | coding    | 0. 145      | 477  | 1224 | 1377  |
| MSTRG. 2435. 3  | coding    | 0. 001      | 585  | 1125 | 1312  |
| MSTRG. 2446. 3  | coding    | 0. 241      | 975  | 2292 | 2700  |
| MSTRG. 2447. 1  | coding    | 0. 066      | 1935 | 2028 | 3737  |
| MSTRG. 2475. 4  | coding    | 0. 174      | 0    | 1644 | 2264  |
| MSTRG. 2475. 5  | coding    | 0. 138      | 57   | 1278 | 1469  |
| MSTRG. 2476. 1  | noncoding | -0. 0659456 | 0    | 597  | 873   |
| MSTRG. 2476. 2  | noncoding | -0. 0004096 | 117  | 249  | 527   |
| MSTRG. 2477. 1  | coding    | 0. 053      | 156  | 291  | 561   |
| MSTRG. 2479. 4  | coding    | 0. 048      | 1809 | 2808 | 2975  |
| MSTRG. 2480. 1  | noncoding | -0. 02048   | 837  | 975  | 7270  |
| MSTRG. 2479. 5  | coding    | 0. 069      | 0    | 573  | 2012  |
| MSTRG. 2479. 6  | coding    | 0. 02       | 27   | 519  | 1967  |
| MSTRG. 2479. 7  | coding    | 0. 02       | 27   | 519  | 1990  |
| MSTRG. 2479. 8  | coding    | 0. 02       | 27   | 519  | 1738  |
| MSTRG. 2479. 9  | noncoding | -0. 0483328 | 1410 | 1980 | 2134  |
| MSTRG. 2479. 10 | coding    | 0. 096      | 96   | 357  | 2669  |
| MSTRG. 2479. 13 | coding    | 0. 02       | 21   | 513  | 1516  |
| MSTRG. 2479. 14 | coding    | 0. 02       | 27   | 519  | 2826  |
| MSTRG. 2479. 15 | noncoding | -0. 0483328 | 1812 | 2382 | 2538  |
| MSTRG. 2479. 16 | coding    | 0. 02       | 21   | 513  | 1149  |
| MSTRG. 2479. 17 | coding    | 0. 02       | 27   | 519  | 2256  |
| MSTRG. 2485. 2  | coding    | 0. 144      | 195  | 3213 | 4145  |
| MSTRG. 2485. 3  | coding    | 0. 147      | 162  | 3246 | 4180  |
| MSTRG. 2460. 1  | coding    | 0. 231      | 111  | 2043 | 2196  |
| MSTRG. 2464. 2  | coding    | 0. 132      | 0    | 390  | 3126  |
| MSTRG. 2468. 1  | noncoding | -0. 006144  | 1470 | 1617 | 4664  |
| MSTRG. 2489. 3  | coding    | 0. 153      | 579  | 1278 | 2551  |
| MSTRG. 2492. 2  | coding    | 0. 186      | 0    | 2586 | 4224  |
| MSTRG. 2493. 1  | coding    | 0. 177      | 114  | 1884 | 3688  |
| MSTRG. 2498. 2  | coding    | 0. 163      | 192  | 1758 | 6338  |
| MSTRG. 2509. 3  | coding    | 0. 039      | 1056 | 1296 | 1601  |
| MSTRG. 2509. 5  | coding    | 0. 079      | 1041 | 1392 | 1585  |
| MSTRG. 2509. 4  | coding    | 0. 093      | 1008 | 1299 | 1993  |
| MSTRG. 2510. 1  | noncoding | -0. 0446464 | 273  | 561  | 2183  |
| MSTRG. 2510. 2  | noncoding | -0. 0446464 | 219  | 507  | 1539  |
| MSTRG. 2513. 3  | noncoding | -0. 0114688 | 4332 | 4482 | 4638  |
| MSTRG. 2513. 5  | noncoding | -0. 0405504 | 6372 | 6624 | 6780  |
| MSTRG. 2514. 3  | noncoding | -0. 0446464 | 735  | 933  | 1158  |
| MSTRG. 2515. 1  | noncoding | -0. 0147456 | 2097 | 2214 | 4414  |
| MSTRG. 2499. 1  | noncoding | -0. 0217088 | 0    | 3    | 232   |
| MSTRG. 2508. 1  | noncoding | -0. 004096  | 195  | 282  | 1821  |
| MSTRG. 2517. 2  | coding    | 0. 095      | 0    | 519  | 1997  |
| MSTRG. 2517. 3  | coding    | 0. 05       | 0    | 1104 | 1799  |
| MSTRG. 2519. 3  | coding    | 0. 125      | 2391 | 4881 | 6290  |
| MSTRG. 2519. 4  | coding    | 0. 124      | 2391 | 4884 | 6161  |
| MSTRG. 2529. 1  | coding    | 0. 111      | 0    | 3063 | 10322 |
| MSTRG. 2529. 2  | noncoding | -0. 083968  | 1578 | 1923 | 2077  |
| MSTRG. 2530. 1  | noncoding | -0. 053248  | 1353 | 1440 | 1627  |
| MSTRG. 2566. 1  | noncoding | -0. 0856064 | 0    | 279  | 1724  |
| MSTRG. 2567. 1  | noncoding | -0. 0196608 | 174  | 246  | 2063  |
| MSTRG. 2568. 2  | coding    | 0. 153      | 1374 | 1626 | 2112  |
| MSTRG. 2569. 1  | coding    | 0. 016      | 423  | 1473 | 3309  |

|                 |           |             |      |       |       |
|-----------------|-----------|-------------|------|-------|-------|
| MSTRG. 2569. 2  | coding    | 0. 019      | 2199 | 2412  | 3411  |
| MSTRG. 2569. 4  | noncoding | -0. 0077824 | 2406 | 2619  | 4865  |
| MSTRG. 2569. 6  | coding    | 0. 01       | 12   | 192   | 1160  |
| MSTRG. 2569. 5  | noncoding | -0. 0077824 | 1908 | 2121  | 2831  |
| MSTRG. 2572. 1  | noncoding | -0. 0380928 | 213  | 300   | 1443  |
| MSTRG. 2569. 7  | coding    | 0. 047      | 5748 | 8730  | 17256 |
| MSTRG. 2569. 8  | coding    | 0. 047      | 4578 | 7560  | 15390 |
| MSTRG. 2569. 9  | coding    | 0. 047      | 4077 | 7059  | 8461  |
| MSTRG. 2575. 1  | noncoding | -0. 02048   | 1416 | 1419  | 1896  |
| MSTRG. 2576. 4  | noncoding | -0. 3346432 | 0    | 135   | 292   |
| MSTRG. 2576. 3  | coding    | 0. 244      | 0    | 1026  | 13110 |
| MSTRG. 2577. 1  | coding    | 0. 039      | 1221 | 1623  | 2095  |
| MSTRG. 2576. 5  | coding    | 0. 115      | 78   | 1299  | 5395  |
| MSTRG. 2576. 6  | noncoding | -0. 0315392 | 2205 | 2427  | 8095  |
| MSTRG. 2576. 7  | noncoding | -0. 0344064 | 2289 | 2439  | 14455 |
| MSTRG. 2579. 2  | coding    | 0. 231      | 0    | 3969  | 7772  |
| MSTRG. 2579. 3  | coding    | 0. 22       | 0    | 2019  | 2385  |
| MSTRG. 2541. 2  | noncoding | -0. 2392064 | 0    | 129   | 873   |
| MSTRG. 2542. 1  | noncoding | -0. 0421888 | 189  | 198   | 370   |
| MSTRG. 2543. 1  | noncoding | -0. 024576  | 213  | 240   | 419   |
| MSTRG. 2544. 1  | noncoding | -0. 008192  | 696  | 822   | 1911  |
| MSTRG. 2545. 1  | noncoding | -0. 008192  | 1671 | 1686  | 2925  |
| MSTRG. 2536. 1  | noncoding | -0. 077824  | 81   | 150   | 447   |
| MSTRG. 2540. 1  | noncoding | -0. 018432  | 393  | 456   | 649   |
| MSTRG. 2561. 4  | coding    | 0. 215      | 60   | 705   | 870   |
| MSTRG. 2564. 3  | coding    | 0. 082      | 1791 | 2187  | 2567  |
| MSTRG. 2582. 2  | coding    | 0. 294      | 135  | 864   | 7056  |
| MSTRG. 2582. 3  | coding    | 0. 294      | 159  | 888   | 6873  |
| MSTRG. 2588. 1  | noncoding | -0. 0651264 | 924  | 1416  | 1648  |
| MSTRG. 2589. 2  | coding    | 0. 118      | 150  | 1095  | 5827  |
| MSTRG. 2589. 3  | noncoding | -0. 1040384 | 102  | 474   | 1849  |
| MSTRG. 2589. 4  | coding    | 0. 147      | 0    | 792   | 1265  |
| MSTRG. 2590. 2  | noncoding | -0. 0536576 | 1581 | 1815  | 1972  |
| MSTRG. 2590. 1  | coding    | 0. 342      | 0    | 192   | 1934  |
| MSTRG. 2590. 3  | coding    | 0. 043      | 144  | 684   | 2050  |
| MSTRG. 2591. 5  | noncoding | -0. 0045056 | 120  | 483   | 5570  |
| MSTRG. 2591. 6  | noncoding | -0. 129024  | 0    | 69    | 462   |
| MSTRG. 2594. 1  | coding    | 0. 22       | 168  | 1314  | 1834  |
| MSTRG. 2596. 4  | coding    | 0. 16       | 945  | 6099  | 9241  |
| MSTRG. 2596. 3  | coding    | 0. 146      | 0    | 5979  | 9312  |
| MSTRG. 2597. 2  | noncoding | -0. 034816  | 63   | 177   | 910   |
| MSTRG. 2597. 1  | noncoding | -0. 679936  | 132  | 138   | 797   |
| MSTRG. 2598. 1  | noncoding | -0. 110592  | 51   | 78    | 233   |
| MSTRG. 2602. 1  | noncoding | -0. 0057344 | 351  | 390   | 677   |
| MSTRG. 2602. 2  | coding    | 0. 12       | 150  | 219   | 505   |
| MSTRG. 2602. 3  | coding    | 0. 12       | 147  | 216   | 502   |
| MSTRG. 2602. 10 | noncoding | -0. 06144   | 4689 | 4800  | 5075  |
| MSTRG. 2602. 11 | noncoding | -0. 053248  | 405  | 492   | 5067  |
| MSTRG. 2602. 12 | noncoding | -0. 032768  | 117  | 282   | 1362  |
| MSTRG. 2601. 1  | noncoding | -0. 014336  | 138  | 207   | 420   |
| MSTRG. 2601. 2  | noncoding | -0. 045056  | 15   | 111   | 324   |
| MSTRG. 2605. 3  | coding    | 0. 153      | 438  | 1893  | 5675  |
| MSTRG. 2605. 4  | coding    | 0. 153      | 135  | 1590  | 5372  |
| MSTRG. 2605. 5  | coding    | 0. 241      | 1380 | 10770 | 11145 |

|                 |           |             |      |      |       |
|-----------------|-----------|-------------|------|------|-------|
| MSTRG. 2605. 6  | coding    | 0. 153      | 330  | 1785 | 5565  |
| MSTRG. 2605. 7  | coding    | 0. 239      | 0    | 9702 | 13368 |
| MSTRG. 2605. 8  | coding    | 0. 257      | 18   | 4122 | 4417  |
| MSTRG. 2605. 10 | coding    | 0. 253      | 0    | 6399 | 6774  |
| MSTRG. 2605. 9  | coding    | 0. 269      | 0    | 4554 | 6599  |
| MSTRG. 2605. 11 | coding    | 0. 247      | 1092 | 3048 | 3327  |
| MSTRG. 2609. 7  | coding    | 0. 045      | 2415 | 3036 | 4551  |
| MSTRG. 2609. 8  | coding    | 0. 045      | 2241 | 2862 | 4377  |
| MSTRG. 2609. 9  | coding    | 0. 045      | 2451 | 3072 | 4516  |
| MSTRG. 2610. 2  | noncoding | -0. 028672  | 1143 | 1209 | 6722  |
| MSTRG. 2611. 1  | coding    | 0. 088      | 2715 | 2955 | 4492  |
| MSTRG. 2607. 3  | coding    | 0. 252      | 0    | 1086 | 1595  |
| MSTRG. 2682. 1  | noncoding | -0. 018432  | 2139 | 2256 | 4907  |
| MSTRG. 2614. 1  | noncoding | -0. 0004096 | 0    | 0    | 276   |
| MSTRG. 2632. 1  | noncoding | -0. 016384  | 741  | 861  | 1097  |
| MSTRG. 2633. 1  | noncoding | -0. 1019904 | 0    | 6    | 513   |
| MSTRG. 2634. 3  | noncoding | -0. 012288  | 549  | 570  | 1206  |
| MSTRG. 2635. 1  | noncoding | -0. 028672  | 1587 | 1641 | 3104  |
| MSTRG. 2636. 1  | noncoding | -0. 053248  | 312  | 399  | 1735  |
| MSTRG. 2638. 1  | noncoding | -0. 008192  | 783  | 861  | 1017  |
| MSTRG. 2639. 1  | coding    | 0. 075      | 444  | 1857 | 6591  |
| MSTRG. 2640. 1  | noncoding | -0. 02048   | 381  | 471  | 5197  |
| MSTRG. 2641. 1  | noncoding | -0. 036864  | 192  | 285  | 1839  |
| MSTRG. 2642. 1  | noncoding | -0. 0004096 | 0    | 0    | 508   |
| MSTRG. 2645. 1  | noncoding | -0. 0192512 | 5100 | 5250 | 5407  |
| MSTRG. 2645. 2  | noncoding | -0. 0004096 | 4038 | 4182 | 8683  |
| MSTRG. 2645. 3  | noncoding | -0. 0585728 | 396  | 453  | 868   |
| MSTRG. 2647. 1  | noncoding | -0. 196608  | 324  | 360  | 593   |
| MSTRG. 2647. 2  | noncoding | -0. 0434176 | 303  | 480  | 879   |
| MSTRG. 2649. 1  | noncoding | -0. 0421888 | 342  | 360  | 952   |
| MSTRG. 2668. 3  | coding    | 0. 358      | 0    | 5427 | 10210 |
| MSTRG. 2668. 4  | coding    | 0. 356      | 0    | 5406 | 10189 |
| MSTRG. 2668. 5  | coding    | 0. 36       | 0    | 5556 | 10313 |
| MSTRG. 2668. 6  | coding    | 0. 336      | 0    | 4200 | 8973  |
| MSTRG. 2668. 7  | coding    | 0. 336      | 279  | 4380 | 6121  |
| MSTRG. 2706. 2  | coding    | 0. 422      | 48   | 912  | 1067  |
| MSTRG. 2706. 3  | coding    | 0. 396      | 15   | 1236 | 1391  |
| MSTRG. 2711. 3  | noncoding | -0. 008192  | 273  | 282  | 580   |
| MSTRG. 2711. 4  | coding    | 0. 236      | 627  | 1038 | 1481  |
| MSTRG. 2714. 3  | coding    | 0. 28       | 90   | 1395 | 1566  |
| MSTRG. 2714. 4  | coding    | 0. 258      | 2424 | 3489 | 3661  |
| MSTRG. 2715. 1  | coding    | 0. 275      | 81   | 3939 | 4526  |
| MSTRG. 2715. 4  | coding    | 0. 275      | 99   | 3954 | 4320  |
| MSTRG. 2715. 5  | coding    | 0. 261      | 870  | 3624 | 3991  |
| MSTRG. 2717. 2  | coding    | 0. 423      | 0    | 1257 | 1412  |
| MSTRG. 2720. 1  | noncoding | -0. 043008  | 150  | 333  | 1287  |
| MSTRG. 2721. 2  | coding    | 0. 558      | 327  | 864  | 1019  |
| MSTRG. 2721. 3  | coding    | 0. 515      | 84   | 723  | 878   |
| MSTRG. 2724. 3  | coding    | 0. 224      | 465  | 1461 | 2268  |
| MSTRG. 2740. 1  | coding    | 0. 259      | 216  | 2283 | 2897  |
| MSTRG. 2742. 1  | coding    | 0. 24       | 378  | 1089 | 1549  |
| MSTRG. 2742. 4  | coding    | 0. 287      | 147  | 1047 | 1515  |
| MSTRG. 2742. 5  | coding    | 0. 287      | 57   | 957  | 1425  |
| MSTRG. 2730. 2  | coding    | 0. 447      | 171  | 1884 | 2039  |



|                 |           |             |       |       |       |
|-----------------|-----------|-------------|-------|-------|-------|
| MSTRG. 2732. 1  | coding    | 0. 379      | 33    | 1029  | 2793  |
| MSTRG. 2732. 2  | coding    | 0. 373      | 30    | 909   | 1898  |
| MSTRG. 2732. 5  | coding    | 0. 362      | 18    | 1035  | 1204  |
| MSTRG. 2743. 1  | noncoding | -0. 1241088 | 306   | 2652  | 3290  |
| MSTRG. 2744. 1  | noncoding | -0. 0397312 | 0     | 420   | 798   |
| MSTRG. 2747. 4  | coding    | 0. 319      | 186   | 1200  | 1568  |
| MSTRG. 2750. 1  | noncoding | -0. 0393216 | 12    | 318   | 589   |
| MSTRG. 2750. 2  | noncoding | -0. 0610304 | 36    | 387   | 576   |
| MSTRG. 2750. 3  | noncoding | -0. 0589824 | 141   | 441   | 630   |
| MSTRG. 2749. 5  | coding    | 0. 584      | 0     | 2982  | 7260  |
| MSTRG. 2757. 1  | noncoding | -0. 012288  | 69    | 126   | 386   |
| MSTRG. 2761. 1  | noncoding | -0. 0004096 | 0     | 0     | 256   |
| MSTRG. 2762. 1  | noncoding | -0. 057344  | 0     | 12    | 435   |
| MSTRG. 2766. 2  | coding    | 0. 119      | 162   | 1767  | 2032  |
| MSTRG. 2770. 1  | noncoding | -0. 049152  | 60    | 93    | 315   |
| MSTRG. 2771. 3  | noncoding | -0. 0053248 | 159   | 270   | 819   |
| MSTRG. 2771. 2  | noncoding | -0. 004096  | 36    | 177   | 759   |
| MSTRG. 2772. 1  | coding    | 0. 238      | 0     | 1341  | 2986  |
| MSTRG. 2774. 2  | coding    | 0. 373      | 225   | 1242  | 2222  |
| MSTRG. 2774. 3  | coding    | 0. 365      | 204   | 1197  | 2022  |
| MSTRG. 2775. 1  | noncoding | -0. 0172032 | 222   | 549   | 2961  |
| MSTRG. 2777. 3  | coding    | 0. 064      | 489   | 2592  | 3112  |
| MSTRG. 2778. 1  | noncoding | -0. 1273856 | 0     | 78    | 413   |
| MSTRG. 2778. 2  | noncoding | -0. 0004096 | 0     | 0     | 341   |
| MSTRG. 2804. 3  | noncoding | -0. 04096   | 138   | 237   | 1492  |
| MSTRG. 2806. 5  | noncoding | -0. 0503808 | 7467  | 8103  | 8758  |
| MSTRG. 2806. 6  | noncoding | -0. 0503808 | 4932  | 5568  | 6113  |
| MSTRG. 2806. 7  | noncoding | -0. 0417792 | 10752 | 11241 | 11784 |
| MSTRG. 2806. 8  | noncoding | -0. 270336  | 78    | 105   | 370   |
| MSTRG. 2807. 1  | noncoding | -0. 0401408 | 4494  | 4641  | 7118  |
| MSTRG. 2808. 1  | noncoding | -0. 049152  | 6     | 168   | 1546  |
| MSTRG. 2809. 1  | coding    | 0. 08       | 4737  | 5106  | 8207  |
| MSTRG. 2810. 2  | noncoding | -0. 059392  | 5034  | 5631  | 7254  |
| MSTRG. 2811. 8  | coding    | 0. 085      | 3159  | 3981  | 4207  |
| MSTRG. 2811. 10 | coding    | 0. 055      | 1425  | 2088  | 2314  |
| MSTRG. 2788. 4  | coding    | 0. 131      | 0     | 1698  | 8272  |
| MSTRG. 2788. 5  | coding    | 0. 115      | 0     | 1779  | 9350  |
| MSTRG. 2788. 6  | coding    | 0. 242      | 591   | 1074  | 2494  |
| MSTRG. 2788. 7  | coding    | 0. 242      | 591   | 1074  | 2421  |
| MSTRG. 2793. 3  | coding    | 0. 076      | 744   | 1089  | 1619  |
| MSTRG. 2798. 2  | coding    | 0. 281      | 60    | 1938  | 2979  |
| MSTRG. 2822. 10 | coding    | 0. 079      | 2346  | 5406  | 5894  |
| MSTRG. 2822. 6  | coding    | 0. 091      | 189   | 5874  | 6362  |
| MSTRG. 2829. 1  | coding    | 0. 28       | 435   | 2058  | 3146  |
| MSTRG. 2830. 1  | noncoding | -0. 024576  | 1200  | 1353  | 2173  |
| MSTRG. 2799. 1  | coding    | 0. 12       | 72    | 1650  | 2962  |
| MSTRG. 2800. 2  | coding    | 0. 125      | 168   | 2322  | 2803  |
| MSTRG. 2817. 1  | noncoding | -0. 0167936 | 630   | 783   | 4693  |
| MSTRG. 2819. 1  | noncoding | -0. 0417792 | 0     | 198   | 627   |
| MSTRG. 2819. 2  | noncoding | -0. 094208  | 168   | 252   | 450   |
| MSTRG. 2819. 3  | noncoding | -0. 0294912 | 0     | 375   | 573   |
| MSTRG. 2819. 4  | noncoding | -0. 045056  | 0     | 195   | 1800  |
| MSTRG. 2820. 2  | noncoding | -0. 1318912 | 0     | 678   | 3233  |
| MSTRG. 2820. 3  | coding    | 0. 178      | 480   | 1587  | 3960  |

|                |           |             |       |       |       |
|----------------|-----------|-------------|-------|-------|-------|
| MSTRG. 2816. 4 | coding    | 0. 24       | 330   | 1392  | 5290  |
| MSTRG. 2816. 3 | coding    | 0. 226      | 396   | 1455  | 5352  |
| MSTRG. 2816. 1 | coding    | 0. 233      | 249   | 1353  | 5252  |
| MSTRG. 2816. 5 | noncoding | -0. 036864  | 3909  | 4038  | 4657  |
| MSTRG. 2814. 1 | noncoding | -0. 0212992 | 528   | 600   | 754   |
| MSTRG. 2821. 2 | coding    | 0. 174      | 0     | 2850  | 3094  |
| MSTRG. 2821. 3 | coding    | 0. 159      | 39    | 2844  | 3347  |
| MSTRG. 2833. 3 | coding    | 0. 336      | 1134  | 3303  | 4202  |
| MSTRG. 2833. 4 | noncoding | -0. 065536  | 891   | 1614  | 2512  |
| MSTRG. 2833. 5 | noncoding | -0. 0630784 | 24    | 945   | 1843  |
| MSTRG. 2836. 2 | coding    | 0. 324      | 93    | 2166  | 2637  |
| MSTRG. 2837. 1 | noncoding | -0. 0671744 | 2430  | 2751  | 12154 |
| MSTRG. 2837. 2 | noncoding | -0. 0671744 | 666   | 987   | 4995  |
| MSTRG. 2843. 2 | noncoding | -0. 1626112 | 63    | 426   | 1190  |
| MSTRG. 2840. 3 | coding    | 0. 363      | 189   | 1083  | 2248  |
| MSTRG. 2848. 2 | coding    | 0. 374      | 165   | 2838  | 3914  |
| MSTRG. 2848. 3 | coding    | 0. 373      | 507   | 3144  | 3300  |
| MSTRG. 2848. 4 | coding    | 0. 239      | 231   | 1278  | 1434  |
| MSTRG. 2848. 6 | coding    | 0. 411      | 1206  | 3234  | 4513  |
| MSTRG. 2848. 7 | noncoding | -0. 0917504 | 0     | 102   | 257   |
| MSTRG. 2845. 1 | noncoding | -0. 0380928 | 0     | 666   | 969   |
| MSTRG. 2845. 2 | noncoding | -0. 0339968 | 0     | 585   | 888   |
| MSTRG. 2850. 5 | coding    | 0. 216      | 876   | 1506  | 4449  |
| MSTRG. 2850. 4 | coding    | 0. 207      | 78    | 1092  | 4335  |
| MSTRG. 2850. 6 | noncoding | -0. 0667648 | 0     | 147   | 1901  |
| MSTRG. 2850. 7 | coding    | 0. 203      | 5019  | 5649  | 8626  |
| MSTRG. 2850. 8 | coding    | 0. 197      | 4485  | 5103  | 7773  |
| MSTRG. 2846. 1 | noncoding | -0. 02048   | 1254  | 1359  | 1666  |
| MSTRG. 2857. 2 | noncoding | -0. 1421312 | 0     | 1578  | 3734  |
| MSTRG. 2857. 4 | coding    | 0. 357      | 189   | 1110  | 2339  |
| MSTRG. 2852. 4 | coding    | 0. 403      | 12351 | 13572 | 15093 |
| MSTRG. 2852. 3 | coding    | 0. 403      | 12384 | 13605 | 15127 |
| MSTRG. 2858. 2 | coding    | 0. 368      | 0     | 621   | 3215  |
| MSTRG. 2859. 1 | noncoding | -0. 0135168 | 0     | 18    | 352   |
| MSTRG. 2865. 3 | coding    | 0. 295      | 0     | 1737  | 2754  |
| MSTRG. 2866. 8 | coding    | 0. 101      | 522   | 1704  | 1980  |
| MSTRG. 2871. 1 | coding    | 0. 152      | 0     | 1248  | 3691  |
| MSTRG. 2873. 1 | noncoding | -0. 038912  | 4596  | 5310  | 5655  |
| MSTRG. 2870. 1 | coding    | 0. 111      | 249   | 1485  | 2085  |
| MSTRG. 2879. 1 | coding    | 0. 462      | 0     | 690   | 1530  |
| MSTRG. 2879. 3 | coding    | 0. 476      | 0     | 636   | 1148  |
| MSTRG. 2884. 3 | coding    | 0. 374      | 792   | 2139  | 2631  |
| MSTRG. 2889. 3 | noncoding | -0. 0851968 | 93    | 438   | 1395  |
| MSTRG. 2889. 4 | noncoding | -0. 0724992 | 0     | 168   | 1127  |
| MSTRG. 2894. 2 | noncoding | -0. 0004096 | 39    | 168   | 322   |
| MSTRG. 2897. 1 | coding    | 0. 383      | 2049  | 3411  | 6919  |
| MSTRG. 2898. 2 | coding    | 0. 25       | 6     | 3357  | 3611  |
| MSTRG. 2898. 1 | coding    | 0. 251      | 6     | 3408  | 3814  |
| MSTRG. 2899. 1 | noncoding | -0. 0684032 | 1215  | 1479  | 1920  |
| MSTRG. 2899. 3 | noncoding | -0. 0667648 | 477   | 732   | 1161  |
| MSTRG. 2899. 2 | noncoding | -0. 0442368 | 273   | 945   | 1098  |
| MSTRG. 2898. 4 | coding    | 0. 201      | 186   | 1494  | 1688  |
| MSTRG. 2900. 4 | coding    | 0. 422      | 243   | 1131  | 1540  |
| MSTRG. 2900. 5 | noncoding | -0. 1093632 | 78    | 369   | 778   |

|                |           |             |      |      |       |
|----------------|-----------|-------------|------|------|-------|
| MSTRG. 2906. 4 | coding    | 0. 224      | 222  | 4923 | 5090  |
| MSTRG. 2906. 5 | coding    | 0. 183      | 57   | 3198 | 3363  |
| MSTRG. 2907. 3 | coding    | 0. 367      | 300  | 1860 | 2392  |
| MSTRG. 2909. 1 | coding    | 0. 301      | 516  | 978  | 1347  |
| MSTRG. 2909. 2 | coding    | 0. 226      | 0    | 636  | 1005  |
| MSTRG. 2910. 1 | coding    | 0. 204      | 96   | 798  | 3603  |
| MSTRG. 2910. 4 | coding    | 0. 194      | 516  | 1200 | 2015  |
| MSTRG. 2912. 2 | coding    | 0. 466      | 0    | 1236 | 2245  |
| MSTRG. 2913. 1 | noncoding | -0. 034816  | 291  | 366  | 962   |
| MSTRG. 2914. 1 | coding    | 0. 338      | 243  | 1023 | 2420  |
| MSTRG. 2914. 2 | coding    | 0. 366      | 42   | 846  | 2202  |
| MSTRG. 2921. 1 | noncoding | -0. 0090112 | 525  | 672  | 889   |
| MSTRG. 2922. 1 | noncoding | -0. 0294912 | 93   | 267  | 793   |
| MSTRG. 2922. 2 | noncoding | -0. 0196608 | 0    | 168  | 688   |
| MSTRG. 2920. 1 | noncoding | -0. 0004096 | 0    | 0    | 256   |
| MSTRG. 2924. 2 | coding    | 0. 51       | 0    | 4539 | 5218  |
| MSTRG. 2924. 3 | coding    | 0. 473      | 2172 | 4626 | 5295  |
| MSTRG. 2927. 3 | noncoding | -0. 2220032 | 591  | 1506 | 13020 |
| MSTRG. 2932. 2 | coding    | 0. 223      | 0    | 2454 | 5404  |
| MSTRG. 2932. 6 | coding    | 0. 319      | 0    | 633  | 2985  |
| MSTRG. 2929. 1 | noncoding | -0. 1568768 | 0    | 447  | 781   |
| MSTRG. 2935. 3 | coding    | 0. 235      | 672  | 2307 | 2542  |
| MSTRG. 2943. 3 | coding    | 0. 366      | 81   | 780  | 1010  |
| MSTRG. 2943. 4 | coding    | 0. 388      | 774  | 1251 | 1481  |
| MSTRG. 2943. 5 | coding    | 0. 393      | 477  | 957  | 1189  |
| MSTRG. 2943. 7 | coding    | 0. 349      | 534  | 978  | 1135  |
| MSTRG. 2943. 6 | coding    | 0. 349      | 81   | 867  | 1022  |
| MSTRG. 2950. 1 | coding    | 0. 299      | 441  | 1614 | 2659  |
| MSTRG. 2950. 2 | coding    | 0. 299      | 243  | 1416 | 2281  |
| MSTRG. 2950. 3 | coding    | 0. 293      | 1185 | 2424 | 3184  |
| MSTRG. 2951. 1 | noncoding | -0. 0299008 | 546  | 747  | 903   |
| MSTRG. 2956. 4 | coding    | 0. 217      | 468  | 1608 | 3995  |
| MSTRG. 2956. 5 | coding    | 0. 215      | 321  | 1452 | 3839  |
| MSTRG. 2956. 6 | coding    | 0. 162      | 2190 | 4236 | 6402  |
| MSTRG. 2956. 7 | coding    | 0. 162      | 876  | 2922 | 5042  |
| MSTRG. 2957. 1 | noncoding | -0. 147456  | 3498 | 3564 | 4411  |
| MSTRG. 2948. 3 | coding    | 0. 155      | 69   | 1626 | 5344  |
| MSTRG. 2960. 1 | noncoding | -0. 0602112 | 306  | 483  | 1130  |
| MSTRG. 2968. 1 | coding    | 0. 202      | 0    | 801  | 3035  |
| MSTRG. 2968. 2 | coding    | 0. 155      | 153  | 978  | 3213  |
| MSTRG. 2968. 3 | coding    | 0. 157      | 75   | 975  | 3149  |
| MSTRG. 2973. 1 | coding    | 0. 212      | 45   | 513  | 669   |
| MSTRG. 2978. 3 | coding    | 0. 474      | 462  | 2499 | 2669  |
| MSTRG. 2978. 1 | coding    | 0. 469      | 1530 | 3540 | 3890  |
| MSTRG. 2978. 2 | coding    | 0. 46       | 168  | 2259 | 2610  |
| MSTRG. 2979. 1 | noncoding | -0. 0004096 | 0    | 0    | 440   |
| MSTRG. 2980. 1 | noncoding | -0. 0851968 | 1482 | 1851 | 2458  |
| MSTRG. 2983. 1 | coding    | 0. 003      | 1155 | 1395 | 2242  |
| MSTRG. 2995. 1 | noncoding | -0. 1142784 | 0    | 288  | 1344  |
| MSTRG. 2996. 3 | coding    | 0. 297      | 21   | 1002 | 3132  |
| MSTRG. 2996. 4 | coding    | 0. 29       | 9    | 996  | 3075  |
| MSTRG. 3004. 4 | coding    | 0. 445      | 348  | 1257 | 1414  |
| MSTRG. 3004. 6 | coding    | 0. 483      | 405  | 1707 | 1864  |
| MSTRG. 3004. 7 | coding    | 0. 437      | 555  | 1494 | 1650  |

|                 |           |             |      |      |       |
|-----------------|-----------|-------------|------|------|-------|
| MSTRG. 3001. 1  | coding    | 0. 368      | 681  | 1326 | 1820  |
| MSTRG. 3012. 4  | coding    | 0. 408      | 96   | 1131 | 1386  |
| MSTRG. 3012. 5  | coding    | 0. 421      | 579  | 1611 | 1866  |
| MSTRG. 3012. 6  | coding    | 0. 408      | 192  | 1167 | 1421  |
| MSTRG. 3017. 3  | coding    | 0. 242      | 771  | 1236 | 3063  |
| MSTRG. 3017. 7  | coding    | 0. 242      | 642  | 1107 | 2383  |
| MSTRG. 3014. 2  | coding    | 0. 486      | 9    | 1656 | 4018  |
| MSTRG. 3021. 2  | coding    | 0. 25       | 774  | 2235 | 2606  |
| MSTRG. 3026. 1  | noncoding | -0. 0872448 | 135  | 153  | 359   |
| MSTRG. 3027. 2  | coding    | 0. 524      | 39   | 1515 | 4023  |
| MSTRG. 3027. 3  | coding    | 0. 558      | 0    | 1311 | 3739  |
| MSTRG. 3027. 4  | noncoding | -0. 1376256 | 81   | 366  | 1394  |
| MSTRG. 3028. 1  | coding    | 0. 209      | 0    | 1086 | 4390  |
| MSTRG. 3028. 2  | coding    | 0. 195      | 0    | 726  | 4148  |
| MSTRG. 3028. 3  | coding    | 0. 207      | 570  | 936  | 3934  |
| MSTRG. 3028. 4  | noncoding | -0. 0774144 | 0    | 909  | 4711  |
| MSTRG. 3028. 5  | coding    | 0. 201      | 600  | 1002 | 1527  |
| MSTRG. 3029. 1  | noncoding | -0. 0442368 | 927  | 1266 | 1423  |
| MSTRG. 3031. 6  | coding    | 0. 037      | 54   | 3018 | 3947  |
| MSTRG. 3031. 10 | coding    | 0. 031      | 75   | 2796 | 3718  |
| MSTRG. 3031. 7  | coding    | 0. 035      | 54   | 2973 | 3895  |
| MSTRG. 3031. 9  | coding    | 0. 036      | 54   | 3015 | 3937  |
| MSTRG. 3036. 2  | coding    | 0. 143      | 354  | 858  | 1293  |
| MSTRG. 3037. 1  | coding    | 0. 327      | 387  | 1626 | 2104  |
| MSTRG. 3037. 5  | coding    | 0. 324      | 387  | 1677 | 2861  |
| MSTRG. 3037. 6  | coding    | 0. 326      | 387  | 1419 | 1928  |
| MSTRG. 3039. 3  | coding    | 0. 134      | 309  | 1428 | 2263  |
| MSTRG. 3043. 1  | coding    | 0. 153      | 18   | 447  | 6325  |
| MSTRG. 3043. 7  | coding    | 0. 401      | 0    | 201  | 4368  |
| MSTRG. 3043. 4  | coding    | 0. 401      | 0    | 201  | 2381  |
| MSTRG. 3043. 6  | coding    | 0. 401      | 0    | 201  | 2371  |
| MSTRG. 3043. 3  | coding    | 0. 401      | 0    | 201  | 6157  |
| MSTRG. 3043. 10 | coding    | 0. 133      | 3186 | 3402 | 7064  |
| MSTRG. 3043. 11 | coding    | 0. 114      | 3186 | 3399 | 7061  |
| MSTRG. 3043. 12 | coding    | 0. 114      | 3186 | 3399 | 4314  |
| MSTRG. 3043. 9  | coding    | 0. 145      | 1182 | 1401 | 2314  |
| MSTRG. 3043. 13 | noncoding | -0. 0212992 | 1185 | 1350 | 2190  |
| MSTRG. 3042. 1  | noncoding | -0. 0733184 | 0    | 741  | 1012  |
| MSTRG. 3050. 1  | noncoding | -0. 1306624 | 123  | 156  | 501   |
| MSTRG. 3054. 2  | coding    | 0. 25       | 3    | 630  | 800   |
| MSTRG. 3055. 2  | coding    | 0. 391      | 0    | 372  | 1939  |
| MSTRG. 3044. 2  | coding    | 0. 248      | 117  | 2286 | 4773  |
| MSTRG. 3056. 2  | coding    | 0. 478      | 0    | 444  | 601   |
| MSTRG. 3059. 1  | coding    | 0. 412      | 0    | 2640 | 4040  |
| MSTRG. 3060. 1  | coding    | 0. 399      | 0    | 1035 | 3533  |
| MSTRG. 3061. 1  | noncoding | -0. 059392  | 1149 | 1545 | 1907  |
| MSTRG. 3061. 2  | noncoding | -0. 0438272 | 780  | 1110 | 1471  |
| MSTRG. 3064. 6  | coding    | 0. 145      | 48   | 2358 | 3070  |
| MSTRG. 3064. 5  | coding    | 0. 147      | 66   | 1593 | 19187 |
| MSTRG. 3066. 1  | noncoding | -0. 0897024 | 0    | 633  | 1184  |
| MSTRG. 3068. 4  | coding    | 0. 164      | 1008 | 3000 | 3438  |
| MSTRG. 3068. 5  | coding    | 0. 164      | 570  | 2562 | 3001  |
| MSTRG. 3068. 3  | coding    | 0. 164      | 738  | 2730 | 3167  |
| MSTRG. 3065. 1  | noncoding | -0. 237568  | 0    | 114  | 464   |

|                 |           |             |       |       |       |
|-----------------|-----------|-------------|-------|-------|-------|
| MSTRG. 3070. 1  | noncoding | -0. 0106496 | 1539  | 1659  | 2168  |
| MSTRG. 3076. 1  | coding    | 0. 336      | 204   | 3921  | 7673  |
| MSTRG. 3085. 2  | coding    | 0. 477      | 0     | 11736 | 12360 |
| MSTRG. 3087. 2  | noncoding | -0. 073728  | 90    | 567   | 724   |
| MSTRG. 3087. 1  | noncoding | -0. 0536576 | 90    | 519   | 691   |
| MSTRG. 3093. 1  | noncoding | -0. 0380928 | 12    | 225   | 393   |
| MSTRG. 3092. 4  | coding    | 0. 472      | 0     | 2427  | 3274  |
| MSTRG. 3092. 5  | noncoding | -0. 1056768 | 240   | 861   | 1709  |
| MSTRG. 3088. 2  | coding    | 0. 475      | 111   | 1884  | 2463  |
| MSTRG. 3088. 3  | coding    | 0. 475      | 111   | 1884  | 2461  |
| MSTRG. 3113. 1  | noncoding | -0. 069632  | 0     | 525   | 3625  |
| MSTRG. 3114. 1  | coding    | 0. 185      | 57    | 6048  | 6502  |
| MSTRG. 3115. 1  | noncoding | -0. 0135168 | 6351  | 6558  | 12912 |
| MSTRG. 3116. 1  | noncoding | -0. 065536  | 11889 | 11982 | 17077 |
| MSTRG. 3116. 2  | noncoding | -0. 065536  | 10965 | 11058 | 13185 |
| MSTRG. 3114. 2  | coding    | 0. 19       | 246   | 4929  | 5864  |
| MSTRG. 3114. 4  | coding    | 0. 195      | 216   | 4845  | 5713  |
| MSTRG. 3114. 3  | coding    | 0. 196      | 240   | 4878  | 5813  |
| MSTRG. 3114. 5  | coding    | 0. 195      | 216   | 4842  | 5777  |
| MSTRG. 3114. 7  | coding    | 0. 19       | 1110  | 5793  | 6662  |
| MSTRG. 3114. 13 | coding    | 0. 196      | 324   | 4956  | 5891  |
| MSTRG. 3114. 8  | coding    | 0. 196      | 204   | 4839  | 5774  |
| MSTRG. 3114. 9  | coding    | 0. 222      | 2808  | 5937  | 6872  |
| MSTRG. 3117. 1  | noncoding | -0. 057344  | 1566  | 1662  | 3470  |
| MSTRG. 3118. 1  | noncoding | -0. 0454656 | 651   | 753   | 3973  |
| MSTRG. 3114. 14 | coding    | 0. 191      | 1833  | 6525  | 7394  |
| MSTRG. 3114. 15 | coding    | 0. 191      | 1152  | 5838  | 6706  |
| MSTRG. 3122. 1  | noncoding | -0. 0421888 | 114   | 117   | 546   |
| MSTRG. 3124. 3  | coding    | 0. 17       | 270   | 1794  | 4095  |
| MSTRG. 3124. 4  | coding    | 0. 164      | 342   | 1785  | 3422  |
| MSTRG. 3124. 5  | coding    | 0. 164      | 327   | 1770  | 3408  |
| MSTRG. 3124. 8  | coding    | 0. 193      | 1416  | 2079  | 3718  |
| MSTRG. 3100. 1  | noncoding | -0. 0688128 | 0     | 591   | 2860  |
| MSTRG. 3101. 1  | coding    | 0. 549      | 0     | 3810  | 4100  |
| MSTRG. 3101. 3  | coding    | 0. 552      | 0     | 3744  | 4036  |
| MSTRG. 3101. 2  | coding    | 0. 553      | 0     | 3741  | 8631  |
| MSTRG. 3101. 4  | coding    | 0. 561      | 0     | 3591  | 3884  |
| MSTRG. 3101. 5  | coding    | 0. 389      | 0     | 1224  | 1515  |
| MSTRG. 3104. 1  | noncoding | -0. 036864  | 21    | 117   | 1983  |
| MSTRG. 3101. 6  | coding    | 0. 47       | 300   | 1701  | 2023  |
| MSTRG. 3096. 2  | coding    | 0. 322      | 129   | 1224  | 2463  |
| MSTRG. 3106. 3  | coding    | 0. 416      | 60    | 3738  | 3892  |
| MSTRG. 3106. 4  | coding    | 0. 425      | 0     | 3597  | 3752  |
| MSTRG. 3106. 5  | coding    | 0. 428      | 0     | 3474  | 3629  |
| MSTRG. 3106. 6  | coding    | 0. 406      | 333   | 3576  | 3730  |
| MSTRG. 3106. 7  | coding    | 0. 392      | 0     | 1536  | 1690  |
| MSTRG. 3106. 8  | noncoding | -0. 0135168 | 453   | 798   | 953   |
| MSTRG. 3109. 1  | coding    | 0. 223      | 48    | 711   | 1417  |
| MSTRG. 3111. 1  | noncoding | -0. 034816  | 333   | 555   | 757   |
| MSTRG. 3125. 3  | coding    | 0. 393      | 0     | 561   | 1736  |
| MSTRG. 3126. 2  | coding    | 0. 403      | 0     | 126   | 638   |
| MSTRG. 3127. 3  | coding    | 0. 364      | 0     | 873   | 1366  |
| MSTRG. 3127. 4  | coding    | 0. 355      | 0     | 912   | 1404  |
| MSTRG. 3130. 1  | coding    | 0. 59       | 0     | 699   | 1064  |

|                 |           |             |       |       |       |
|-----------------|-----------|-------------|-------|-------|-------|
| MSTRG. 3130. 2  | coding    | 0. 51       | 135   | 1167  | 4167  |
| MSTRG. 3130. 3  | coding    | 0. 51       | 135   | 1167  | 4060  |
| MSTRG. 3132. 1  | coding    | 0. 439      | 57    | 999   | 2769  |
| MSTRG. 3132. 3  | coding    | 0. 292      | 66    | 1518  | 1972  |
| MSTRG. 3133. 1  | coding    | 0. 503      | 0     | 3003  | 5271  |
| MSTRG. 3133. 3  | coding    | 0. 488      | 0     | 3129  | 4412  |
| MSTRG. 3133. 4  | coding    | 0. 488      | 0     | 3129  | 4326  |
| MSTRG. 3133. 5  | coding    | 0. 487      | 0     | 3132  | 4329  |
| MSTRG. 3134. 1  | noncoding | -0. 032768  | 1146  | 1275  | 2278  |
| MSTRG. 3144. 2  | coding    | 0. 439      | 0     | 15324 | 15753 |
| MSTRG. 3136. 1  | noncoding | -0. 0667648 | 1065  | 1368  | 2374  |
| MSTRG. 3137. 1  | noncoding | -0. 022528  | 222   | 480   | 972   |
| MSTRG. 3135. 1  | noncoding | -0. 0446464 | 366   | 750   | 988   |
| MSTRG. 3135. 2  | noncoding | -0. 0421888 | 114   | 453   | 684   |
| MSTRG. 3141. 1  | coding    | 0. 342      | 27    | 417   | 654   |
| MSTRG. 3146. 1  | noncoding | -0. 0208896 | 126   | 192   | 548   |
| MSTRG. 3146. 2  | noncoding | -0. 0290816 | 354   | 615   | 993   |
| MSTRG. 3153. 1  | noncoding | -0. 002048  | 54    | 195   | 631   |
| MSTRG. 3154. 1  | coding    | 0. 549      | 15    | 3945  | 4439  |
| MSTRG. 3154. 4  | coding    | 0. 546      | 279   | 4161  | 4416  |
| MSTRG. 3154. 5  | coding    | 0. 479      | 33    | 1806  | 1961  |
| MSTRG. 3155. 1  | noncoding | -0. 063488  | 0     | 1098  | 1717  |
| MSTRG. 3151. 1  | noncoding | -0. 032768  | 204   | 318   | 473   |
| MSTRG. 3152. 1  | coding    | 0. 446      | 102   | 591   | 927   |
| MSTRG. 3157. 2  | coding    | 0. 338      | 519   | 1242  | 1490  |
| MSTRG. 3157. 3  | coding    | 0. 345      | 444   | 1113  | 1360  |
| MSTRG. 3157. 5  | coding    | 0. 347      | 333   | 1065  | 1313  |
| MSTRG. 3163. 1  | noncoding | -0. 0221184 | 0     | 1332  | 1505  |
| MSTRG. 3166. 3  | coding    | 0. 305      | 0     | 756   | 7976  |
| MSTRG. 3166. 6  | coding    | 0. 244      | 24    | 897   | 1214  |
| MSTRG. 3166. 7  | coding    | 0. 305      | 0     | 753   | 1071  |
| MSTRG. 3159. 4  | coding    | 0. 234      | 102   | 1887  | 5642  |
| MSTRG. 3179. 7  | coding    | 0. 1        | 3555  | 3774  | 9743  |
| MSTRG. 3179. 9  | noncoding | -0. 06144   | 1401  | 1425  | 1972  |
| MSTRG. 3179. 10 | noncoding | -0. 004096  | 6513  | 6723  | 10496 |
| MSTRG. 3179. 11 | coding    | 0. 09       | 2025  | 2097  | 2632  |
| MSTRG. 3183. 1  | coding    | 0. 144      | 606   | 1572  | 3120  |
| MSTRG. 3173. 1  | noncoding | -0. 065536  | 312   | 399   | 1416  |
| MSTRG. 3176. 1  | noncoding | -0. 0147456 | 6768  | 7203  | 7359  |
| MSTRG. 3177. 1  | noncoding | -0. 004096  | 201   | 264   | 417   |
| MSTRG. 3178. 3  | noncoding | -0. 0827392 | 0     | 252   | 3435  |
| MSTRG. 3185. 1  | coding    | 0. 357      | 0     | 1566  | 4959  |
| MSTRG. 3185. 2  | coding    | 0. 304      | 210   | 1875  | 10303 |
| MSTRG. 3186. 1  | coding    | 0. 034      | 11370 | 12138 | 14103 |
| MSTRG. 3185. 3  | coding    | 0. 216      | 120   | 552   | 4189  |
| MSTRG. 3186. 6  | coding    | 0. 101      | 8340  | 9354  | 9912  |
| MSTRG. 3186. 4  | coding    | 0. 102      | 1638  | 2844  | 3402  |
| MSTRG. 3186. 9  | coding    | 0. 074      | 1638  | 2322  | 3208  |
| MSTRG. 3186. 10 | coding    | 0. 047      | 933   | 2175  | 3156  |
| MSTRG. 3186. 11 | noncoding | -0. 045056  | 3036  | 3156  | 3310  |
| MSTRG. 3186. 12 | noncoding | -0. 0118784 | 2064  | 2229  | 5425  |
| MSTRG. 3187. 1  | noncoding | -0. 008192  | 2085  | 2181  | 5376  |
| MSTRG. 3188. 1  | noncoding | -0. 0024576 | 4572  | 4716  | 5010  |
| MSTRG. 3189. 1  | noncoding | -0. 0790528 | 213   | 678   | 1178  |

|                |           |             |      |      |       |
|----------------|-----------|-------------|------|------|-------|
| MSTRG. 3190. 2 | noncoding | -0. 0835584 | 99   | 333  | 1471  |
| MSTRG. 3190. 3 | noncoding | -0. 079872  | 99   | 330  | 1468  |
| MSTRG. 3197. 1 | coding    | 0. 149      | 390  | 1110 | 1440  |
| MSTRG. 3198. 1 | noncoding | -0. 0315392 | 411  | 480  | 1153  |
| MSTRG. 3214. 1 | noncoding | -0. 0503808 | 3774 | 4482 | 4637  |
| MSTRG. 3221. 1 | noncoding | -0. 04096   | 549  | 618  | 1186  |
| MSTRG. 3226. 1 | noncoding | -0. 0577536 | 291  | 870  | 1025  |
| MSTRG. 3228. 2 | coding    | 0. 412      | 747  | 2610 | 4508  |
| MSTRG. 3215. 1 | noncoding | -0. 0077824 | 933  | 1134 | 1290  |
| MSTRG. 3217. 1 | coding    | 0. 078      | 276  | 465  | 769   |
| MSTRG. 3218. 1 | noncoding | -0. 0200704 | 3393 | 3561 | 4544  |
| MSTRG. 3220. 1 | noncoding | -0. 0004096 | 0    | 0    | 358   |
| MSTRG. 3234. 2 | coding    | 0. 41       | 0    | 867  | 1164  |
| MSTRG. 3248. 1 | noncoding | -0. 049152  | 4776 | 4860 | 7473  |
| MSTRG. 3249. 1 | noncoding | -0. 002048  | 6453 | 6615 | 9651  |
| MSTRG. 3243. 1 | noncoding | -0. 012288  | 177  | 237  | 833   |
| MSTRG. 3244. 1 | noncoding | -0. 0401408 | 45   | 189  | 430   |
| MSTRG. 3245. 1 | noncoding | -0. 0004096 | 0    | 0    | 282   |
| MSTRG. 3252. 1 | noncoding | -0. 151552  | 2421 | 2484 | 2916  |
| MSTRG. 3252. 3 | noncoding | -0. 151552  | 2391 | 2454 | 2874  |
| MSTRG. 3252. 4 | noncoding | -0. 151552  | 2391 | 2454 | 4189  |
| MSTRG. 3252. 5 | noncoding | -0. 151552  | 2373 | 2436 | 4043  |
| MSTRG. 3254. 1 | noncoding | -0. 0282624 | 168  | 315  | 801   |
| MSTRG. 3259. 3 | coding    | 0. 144      | 1383 | 2799 | 3403  |
| MSTRG. 3259. 4 | coding    | 0. 126      | 1209 | 2331 | 3350  |
| MSTRG. 3261. 1 | coding    | 0. 565      | 0    | 444  | 887   |
| MSTRG. 3263. 1 | coding    | 0. 084      | 6747 | 7116 | 11233 |
| MSTRG. 3264. 1 | noncoding | -0. 139264  | 72   | 99   | 615   |
| MSTRG. 3267. 2 | coding    | 0. 378      | 186  | 2736 | 3207  |
| MSTRG. 3267. 4 | coding    | 0. 401      | 0    | 2334 | 2866  |
| MSTRG. 3269. 1 | noncoding | -0. 0401408 | 2025 | 2163 | 2428  |
| MSTRG. 3270. 2 | coding    | 0. 091      | 0    | 1926 | 6842  |
| MSTRG. 3270. 3 | coding    | 0. 377      | 960  | 1845 | 6005  |
| MSTRG. 3271. 1 | coding    | 0. 144      | 2148 | 2511 | 4799  |
| MSTRG. 3279. 1 | noncoding | -0. 0139264 | 3957 | 4161 | 4980  |
| MSTRG. 3282. 2 | coding    | 0. 057      | 0    | 315  | 1064  |
| MSTRG. 3282. 3 | noncoding | -0. 0053248 | 102  | 213  | 962   |
| MSTRG. 3282. 4 | noncoding | -0. 0053248 | 159  | 270  | 1019  |
| MSTRG. 3282. 6 | coding    | 0. 018      | 1968 | 2304 | 2608  |
| MSTRG. 3282. 5 | coding    | 0. 018      | 123  | 459  | 763   |
| MSTRG. 3282. 7 | coding    | 0. 001      | 78   | 384  | 688   |
| MSTRG. 3294. 1 | noncoding | -0. 0004096 | 354  | 480  | 634   |
| MSTRG. 3294. 2 | noncoding | -0. 0802816 | 0    | 138  | 293   |
| MSTRG. 3296. 4 | coding    | 0. 248      | 51   | 540  | 1045  |
| MSTRG. 3296. 3 | coding    | 0. 213      | 174  | 606  | 1112  |
| MSTRG. 3297. 5 | coding    | 0. 388      | 90   | 1059 | 1646  |
| MSTRG. 3300. 1 | coding    | 0. 221      | 0    | 1104 | 5175  |
| MSTRG. 3300. 2 | noncoding | -0. 1110016 | 0    | 555  | 1160  |
| MSTRG. 3287. 1 | noncoding | -0. 032768  | 54   | 132  | 364   |
| MSTRG. 3307. 1 | coding    | 0. 54       | 534  | 2277 | 5616  |
| MSTRG. 3307. 4 | coding    | 0. 546      | 1080 | 2199 | 6048  |
| MSTRG. 3307. 2 | coding    | 0. 432      | 2928 | 5241 | 8418  |
| MSTRG. 3307. 3 | coding    | 0. 539      | 534  | 2280 | 5456  |
| MSTRG. 3307. 6 | coding    | 0. 535      | 519  | 1944 | 5089  |

|                |           |             |       |       |       |
|----------------|-----------|-------------|-------|-------|-------|
| MSTRG. 3312. 1 | coding    | 0. 336      | 16308 | 18039 | 22351 |
| MSTRG. 3314. 1 | noncoding | -0. 0090112 | 6195  | 6288  | 6724  |
| MSTRG. 3317. 2 | coding    | 0. 408      | 1311  | 3012  | 3411  |
| MSTRG. 3317. 3 | coding    | 0. 397      | 678   | 2553  | 2952  |
| MSTRG. 3317. 4 | coding    | 0. 407      | 894   | 2469  | 2869  |
| MSTRG. 3317. 5 | coding    | 0. 405      | 0     | 2541  | 2939  |
| MSTRG. 3317. 6 | coding    | 0. 43       | 678   | 2580  | 2979  |
| MSTRG. 3320. 1 | noncoding | -0. 0503808 | 6072  | 6855  | 7012  |
| MSTRG. 3321. 4 | coding    | 0. 366      | 0     | 855   | 1447  |
| MSTRG. 3321. 3 | coding    | 0. 427      | 285   | 945   | 1536  |
| MSTRG. 3321. 6 | coding    | 0. 446      | 174   | 804   | 1564  |
| MSTRG. 3333. 1 | noncoding | -0. 14336   | 1293  | 1317  | 1564  |
| MSTRG. 3339. 3 | coding    | 0. 519      | 3084  | 4998  | 9998  |
| MSTRG. 3339. 4 | coding    | 0. 511      | 57    | 1671  | 2520  |
| MSTRG. 3340. 1 | noncoding | -0. 0098304 | 2895  | 3039  | 4615  |
| MSTRG. 3342. 2 | coding    | 0. 191      | 99    | 390   | 888   |
| MSTRG. 3342. 1 | coding    | 0. 169      | 333   | 627   | 1127  |
| MSTRG. 3343. 1 | noncoding | -0. 06144   | 852   | 915   | 1179  |
| MSTRG. 3343. 2 | noncoding | -0. 0139264 | 2334  | 2445  | 3455  |
| MSTRG. 3346. 1 | noncoding | -0. 0495616 | 0     | 60    | 298   |
| MSTRG. 3354. 3 | coding    | 0. 234      | 0     | 120   | 274   |
| MSTRG. 3357. 1 | coding    | 0. 398      | 1341  | 6024  | 6946  |
| MSTRG. 3357. 2 | coding    | 0. 402      | 1341  | 6144  | 7066  |
| MSTRG. 3358. 1 | noncoding | -1. 032192  | 1794  | 1929  | 2728  |
| MSTRG. 3357. 4 | coding    | 0. 405      | 1365  | 5172  | 6096  |
| MSTRG. 3359. 6 | noncoding | -0. 0782336 | 0     | 297   | 798   |
| MSTRG. 3364. 1 | coding    | 0. 332      | 708   | 2061  | 2265  |
| MSTRG. 3364. 3 | coding    | 0. 325      | 666   | 2100  | 2303  |
| MSTRG. 3364. 4 | coding    | 0. 35       | 570   | 1371  | 2762  |
| MSTRG. 3364. 5 | coding    | 0. 39       | 300   | 945   | 2340  |
| MSTRG. 3364. 6 | coding    | 0. 365      | 423   | 1146  | 2541  |
| MSTRG. 3364. 7 | noncoding | -0. 1306624 | 378   | 840   | 2039  |
| MSTRG. 3371. 1 | coding    | 0. 273      | 111   | 1407  | 1934  |
| MSTRG. 3373. 2 | coding    | 0. 444      | 693   | 4017  | 5028  |
| MSTRG. 3374. 3 | noncoding | -0. 0618496 | 6663  | 7218  | 13965 |
| MSTRG. 3375. 1 | noncoding | -0. 024576  | 0     | 183   | 682   |
| MSTRG. 3381. 2 | noncoding | -0. 1441792 | 48    | 558   | 987   |
| MSTRG. 3384. 1 | coding    | 0. 298      | 0     | 2217  | 3026  |
| MSTRG. 3389. 3 | coding    | 0. 33       | 0     | 1059  | 7560  |
| MSTRG. 3389. 2 | coding    | 0. 376      | 309   | 1653  | 3550  |
| MSTRG. 3389. 4 | coding    | 0. 356      | 735   | 2460  | 4331  |
| MSTRG. 3390. 2 | coding    | 0. 16       | 252   | 675   | 847   |
| MSTRG. 3415. 2 | coding    | 0. 161      | 75    | 729   | 1168  |
| MSTRG. 3415. 3 | coding    | 0. 174      | 33    | 993   | 2842  |
| MSTRG. 3418. 1 | coding    | 0. 12       | 93    | 1374  | 1886  |
| MSTRG. 3420. 6 | coding    | 0. 15       | 3474  | 8811  | 10753 |
| MSTRG. 3420. 7 | coding    | 0. 131      | 3474  | 8193  | 10570 |
| MSTRG. 3420. 8 | coding    | 0. 149      | 3516  | 8673  | 10654 |
| MSTRG. 3421. 1 | noncoding | -0. 0004096 | 357   | 504   | 2496  |
| MSTRG. 3424. 1 | coding    | 0. 299      | 105   | 2430  | 2586  |
| MSTRG. 3400. 2 | coding    | 0. 366      | 0     | 1659  | 4137  |
| MSTRG. 3400. 6 | coding    | 0. 31       | 441   | 1446  | 3937  |
| MSTRG. 3400. 3 | coding    | 0. 377      | 0     | 1533  | 4013  |
| MSTRG. 3400. 4 | coding    | 0. 31       | 441   | 1446  | 3928  |



|                 |           |             |      |      |       |
|-----------------|-----------|-------------|------|------|-------|
| MSTRG. 3401. 2  | noncoding | -0. 0905216 | 732  | 957  | 3141  |
| MSTRG. 3402. 2  | coding    | 0. 348      | 288  | 1254 | 1456  |
| MSTRG. 3427. 2  | coding    | 0. 459      | 0    | 1380 | 1589  |
| MSTRG. 3429. 1  | coding    | 0. 466      | 0    | 1731 | 2351  |
| MSTRG. 3434. 8  | coding    | 0. 34       | 513  | 1935 | 3248  |
| MSTRG. 3435. 1  | coding    | 0. 403      | 0    | 2532 | 3689  |
| MSTRG. 3435. 3  | coding    | 0. 402      | 693  | 3000 | 4157  |
| MSTRG. 3438. 1  | noncoding | -0. 0364544 | 495  | 777  | 1707  |
| MSTRG. 3444. 1  | coding    | 0. 288      | 6528 | 9990 | 12624 |
| MSTRG. 3444. 3  | coding    | 0. 292      | 6495 | 9885 | 12487 |
| MSTRG. 3444. 5  | coding    | 0. 288      | 222  | 3684 | 6318  |
| MSTRG. 3444. 7  | coding    | 0. 288      | 792  | 4254 | 6482  |
| MSTRG. 3444. 12 | coding    | 0. 288      | 2811 | 6273 | 8907  |
| MSTRG. 3444. 13 | coding    | 0. 292      | 45   | 3174 | 5807  |
| MSTRG. 3441. 3  | coding    | 0. 343      | 0    | 1059 | 1403  |
| MSTRG. 3441. 4  | coding    | 0. 322      | 219  | 1023 | 1365  |
| MSTRG. 3446. 1  | noncoding | -0. 0524288 | 306  | 579  | 734   |
| MSTRG. 3470. 3  | coding    | 0. 181      | 156  | 852  | 1175  |
| MSTRG. 3471. 3  | coding    | 0. 157      | 465  | 3615 | 4444  |
| MSTRG. 3471. 1  | coding    | 0. 157      | 96   | 3246 | 4073  |
| MSTRG. 3471. 5  | coding    | 0. 157      | 84   | 3234 | 3434  |
| MSTRG. 3471. 4  | coding    | 0. 163      | 87   | 3321 | 3661  |
| MSTRG. 3471. 10 | coding    | 0. 146      | 12   | 3975 | 4195  |
| MSTRG. 3471. 11 | coding    | 0. 164      | 96   | 3381 | 3599  |
| MSTRG. 3471. 12 | coding    | 0. 146      | 0    | 3900 | 4110  |
| MSTRG. 3471. 13 | coding    | 0. 163      | 465  | 3699 | 3907  |
| MSTRG. 3471. 14 | coding    | 0. 155      | 798  | 3954 | 4148  |
| MSTRG. 3471. 16 | noncoding | -0. 0499712 | 63   | 261  | 2112  |
| MSTRG. 3472. 3  | coding    | 0. 248      | 3    | 333  | 1318  |
| MSTRG. 3474. 1  | noncoding | -0. 049152  | 714  | 1014 | 1688  |
| MSTRG. 3475. 1  | coding    | 0. 398      | 2886 | 3627 | 4985  |
| MSTRG. 3475. 3  | coding    | 0. 398      | 24   | 765  | 1867  |
| MSTRG. 3477. 1  | noncoding | -0. 022528  | 3    | 30   | 598   |
| MSTRG. 3477. 2  | noncoding | -0. 0004096 | 0    | 0    | 454   |
| MSTRG. 3478. 5  | coding    | 0. 104      | 0    | 5526 | 5822  |
| MSTRG. 3478. 7  | coding    | 0. 099      | 0    | 4674 | 6515  |
| MSTRG. 3482. 1  | coding    | 0. 309      | 0    | 597  | 1162  |
| MSTRG. 3447. 2  | noncoding | -0. 0200704 | 675  | 927  | 1238  |
| MSTRG. 3454. 1  | noncoding | -0. 0290816 | 120  | 402  | 571   |
| MSTRG. 3463. 2  | coding    | 0. 408      | 288  | 621  | 789   |
| MSTRG. 3469. 2  | noncoding | -0. 0548864 | 48   | 210  | 723   |
| MSTRG. 3493. 2  | noncoding | -0. 0008192 | 81   | 228  | 1320  |
| MSTRG. 3497. 1  | noncoding | -0. 0708608 | 117  | 219  | 374   |
| MSTRG. 3498. 2  | coding    | 0. 175      | 39   | 1653 | 2980  |
| MSTRG. 3504. 1  | noncoding | -0. 024576  | 2721 | 2868 | 4022  |
| MSTRG. 3509. 1  | noncoding | -0. 0618496 | 327  | 348  | 632   |
| MSTRG. 3521. 1  | coding    | 0. 427      | 5034 | 7611 | 8349  |
| MSTRG. 3521. 2  | coding    | 0. 417      | 303  | 3009 | 3747  |
| MSTRG. 3521. 3  | coding    | 0. 414      | 228  | 2979 | 3716  |
| MSTRG. 3521. 4  | coding    | 0. 421      | 228  | 2871 | 3608  |
| MSTRG. 3521. 5  | coding    | 0. 414      | 228  | 2979 | 3716  |
| MSTRG. 3521. 6  | coding    | 0. 421      | 237  | 2880 | 3617  |
| MSTRG. 3521. 7  | coding    | 0. 433      | 438  | 2970 | 3706  |
| MSTRG. 3521. 11 | coding    | 0. 421      | 744  | 3066 | 4437  |

|                |           |             |      |      |       |
|----------------|-----------|-------------|------|------|-------|
| MSTRG. 3530. 4 | noncoding | -0. 0462848 | 66   | 390  | 965   |
| MSTRG. 3536. 2 | noncoding | -0. 0311296 | 498  | 675  | 924   |
| MSTRG. 3536. 3 | coding    | 0. 076      | 408  | 585  | 833   |
| MSTRG. 3536. 4 | noncoding | -0. 0311296 | 339  | 516  | 765   |
| MSTRG. 3536. 5 | coding    | 0. 144      | 96   | 444  | 689   |
| MSTRG. 3536. 6 | coding    | 0. 076      | 504  | 681  | 869   |
| MSTRG. 3543. 3 | coding    | 0. 231      | 999  | 2628 | 4173  |
| MSTRG. 3544. 1 | coding    | 0. 3        | 522  | 1863 | 2445  |
| MSTRG. 3544. 2 | coding    | 0. 3        | 774  | 2115 | 2698  |
| MSTRG. 3544. 4 | coding    | 0. 3        | 510  | 1851 | 2332  |
| MSTRG. 3544. 3 | coding    | 0. 305      | 1695 | 2637 | 3220  |
| MSTRG. 3544. 7 | coding    | 0. 296      | 1494 | 2409 | 2993  |
| MSTRG. 3546. 1 | coding    | 0. 356      | 6    | 1149 | 2102  |
| MSTRG. 3547. 5 | coding    | 0. 293      | 48   | 3828 | 4341  |
| MSTRG. 3547. 4 | coding    | 0. 293      | 123  | 3897 | 4409  |
| MSTRG. 3547. 6 | coding    | 0. 271      | 1011 | 1473 | 2195  |
| MSTRG. 3542. 4 | coding    | 0. 145      | 321  | 2436 | 4597  |
| MSTRG. 3550. 3 | coding    | 0. 192      | 621  | 954  | 3064  |
| MSTRG. 3548. 1 | noncoding | -0. 0106496 | 675  | 879  | 1087  |
| MSTRG. 3557. 2 | coding    | 0. 174      | 384  | 4473 | 8057  |
| MSTRG. 3557. 3 | coding    | 0. 172      | 384  | 4551 | 8135  |
| MSTRG. 3558. 1 | noncoding | -0. 126976  | 1392 | 1446 | 2072  |
| MSTRG. 3559. 1 | noncoding | -0. 032768  | 4437 | 4608 | 17056 |
| MSTRG. 3561. 4 | coding    | 0. 215      | 90   | 1371 | 1878  |
| MSTRG. 3561. 5 | coding    | 0. 255      | 384  | 1851 | 2637  |
| MSTRG. 3561. 6 | coding    | 0. 259      | 549  | 2586 | 2741  |
| MSTRG. 3561. 7 | coding    | 0. 241      | 0    | 2160 | 2314  |
| MSTRG. 3563. 3 | noncoding | -0. 0299008 | 54   | 480  | 1301  |
| MSTRG. 3563. 4 | coding    | 0. 128      | 72   | 588  | 1367  |
| MSTRG. 3565. 1 | coding    | 0. 258      | 171  | 594  | 1991  |
| MSTRG. 3562. 1 | coding    | 0. 292      | 51   | 807  | 3427  |
| MSTRG. 3566. 3 | coding    | 0. 385      | 0    | 1167 | 1354  |
| MSTRG. 3566. 2 | coding    | 0. 368      | 0    | 1212 | 1400  |
| MSTRG. 3570. 2 | coding    | 0. 245      | 309  | 2499 | 5934  |
| MSTRG. 3580. 1 | coding    | 0. 565      | 0    | 354  | 2561  |
| MSTRG. 3580. 2 | coding    | 0. 608      | 0    | 348  | 2174  |
| MSTRG. 3588. 6 | coding    | 0. 256      | 42   | 1254 | 1497  |
| MSTRG. 3588. 7 | coding    | 0. 197      | 177  | 1155 | 1378  |
| MSTRG. 3592. 6 | coding    | 0. 186      | 144  | 699  | 1280  |
| MSTRG. 3593. 3 | noncoding | -0. 0303104 | 249  | 564  | 1287  |
| MSTRG. 3598. 1 | coding    | 0. 035      | 579  | 777  | 1311  |
| MSTRG. 3602. 1 | coding    | 0. 124      | 315  | 495  | 1831  |
| MSTRG. 3604. 2 | coding    | 0. 314      | 0    | 1353 | 3733  |
| MSTRG. 3604. 3 | coding    | 0. 314      | 0    | 1356 | 3736  |
| MSTRG. 3604. 4 | coding    | 0. 3        | 318  | 1047 | 3697  |
| MSTRG. 3604. 5 | coding    | 0. 262      | 360  | 861  | 3239  |
| MSTRG. 3604. 6 | coding    | 0. 24       | 264  | 750  | 3123  |
| MSTRG. 3606. 2 | coding    | 0. 161      | 0    | 630  | 1583  |
| MSTRG. 3606. 3 | coding    | 0. 159      | 0    | 636  | 1589  |
| MSTRG. 3612. 3 | noncoding | -0. 0004096 | 2313 | 2439 | 2594  |
| MSTRG. 3612. 2 | noncoding | -0. 004096  | 3507 | 3651 | 6649  |
| MSTRG. 3612. 4 | coding    | 0. 014      | 696  | 822  | 3023  |
| MSTRG. 3614. 1 | noncoding | -0. 024576  | 153  | 213  | 923   |
| MSTRG. 3623. 1 | coding    | 0. 108      | 111  | 1425 | 11680 |

|                 |           |             |      |      |      |
|-----------------|-----------|-------------|------|------|------|
| MSTRG. 3623. 2  | coding    | 0. 112      | 66   | 1386 | 1563 |
| MSTRG. 3623. 7  | coding    | 0. 162      | 1278 | 1923 | 2479 |
| MSTRG. 3631. 1  | noncoding | -0. 0004096 | 0    | 0    | 505  |
| MSTRG. 3633. 4  | noncoding | -0. 04096   | 60   | 297  | 7667 |
| MSTRG. 3642. 2  | coding    | 0. 272      | 174  | 1977 | 3242 |
| MSTRG. 3642. 3  | coding    | 0. 278      | 174  | 1758 | 3023 |
| MSTRG. 3650. 1  | noncoding | -0. 0008192 | 1263 | 1326 | 2020 |
| MSTRG. 3651. 1  | noncoding | -0. 0372736 | 882  | 1140 | 3572 |
| MSTRG. 3652. 1  | coding    | 0. 17       | 393  | 987  | 3048 |
| MSTRG. 3654. 1  | noncoding | -0. 024576  | 150  | 237  | 2208 |
| MSTRG. 3658. 1  | noncoding | -0. 0077824 | 0    | 102  | 355  |
| MSTRG. 3659. 2  | coding    | 0. 311      | 225  | 1155 | 1487 |
| MSTRG. 3663. 1  | noncoding | -0. 0319488 | 0    | 342  | 1300 |
| MSTRG. 3664. 1  | noncoding | -0. 004096  | 81   | 156  | 384  |
| MSTRG. 3675. 1  | noncoding | -0. 0966656 | 7488 | 8250 | 8445 |
| MSTRG. 3675. 2  | noncoding | -0. 0966656 | 6942 | 7704 | 7898 |
| MSTRG. 3675. 3  | noncoding | -0. 0966656 | 6363 | 7125 | 7318 |
| MSTRG. 3675. 4  | coding    | 0. 051      | 132  | 1170 | 5368 |
| MSTRG. 3675. 5  | coding    | 0. 152      | 1038 | 1386 | 5608 |
| MSTRG. 3675. 6  | coding    | 0. 06       | 816  | 1953 | 6134 |
| MSTRG. 3675. 7  | coding    | 0. 047      | 816  | 1866 | 3627 |
| MSTRG. 3675. 8  | noncoding | -0. 1015808 | 6129 | 6873 | 7054 |
| MSTRG. 3675. 9  | noncoding | -0. 1015808 | 5766 | 6510 | 6708 |
| MSTRG. 3675. 10 | coding    | 0. 058      | 804  | 2559 | 5238 |
| MSTRG. 3675. 11 | coding    | 0. 048      | 372  | 1365 | 7489 |
| MSTRG. 3676. 1  | noncoding | -0. 0249856 | 687  | 1023 | 5543 |
| MSTRG. 3674. 1  | noncoding | -0. 0004096 | 0    | 0    | 255  |
| MSTRG. 3679. 1  | coding    | 0. 277      | 0    | 2094 | 2371 |
| MSTRG. 3679. 2  | coding    | 0. 322      | 639  | 2442 | 2718 |
| MSTRG. 3679. 3  | coding    | 0. 369      | 1032 | 2238 | 2515 |
| MSTRG. 3685. 1  | coding    | 0. 54       | 0    | 3657 | 6906 |
| MSTRG. 3685. 2  | coding    | 0. 546      | 609  | 4149 | 7582 |
| MSTRG. 3687. 2  | coding    | 0. 107      | 0    | 510  | 4358 |
| MSTRG. 3694. 1  | noncoding | -0. 1875968 | 0    | 444  | 921  |
| MSTRG. 3702. 2  | coding    | 0. 067      | 4563 | 5706 | 6702 |
| MSTRG. 3702. 3  | coding    | 0. 07       | 2826 | 4302 | 5242 |
| MSTRG. 3704. 1  | noncoding | -0. 0004096 | 0    | 0    | 593  |
| MSTRG. 3707. 2  | coding    | 0. 112      | 1026 | 2970 | 5165 |
| MSTRG. 3707. 3  | noncoding | -0. 0376832 | 0    | 123  | 346  |
| MSTRG. 3708. 2  | noncoding | -0. 24576   | 159  | 210  | 982  |
| MSTRG. 3710. 1  | coding    | 0. 046      | 171  | 3087 | 7925 |
| MSTRG. 3712. 1  | noncoding | -0. 016384  | 3237 | 3279 | 4536 |
| MSTRG. 3710. 4  | coding    | 0. 035      | 498  | 2883 | 7422 |
| MSTRG. 3710. 5  | coding    | 0. 069      | 1650 | 2685 | 7522 |
| MSTRG. 3716. 2  | coding    | 0. 145      | 0    | 3351 | 7527 |
| MSTRG. 3716. 3  | coding    | 0. 127      | 0    | 3477 | 7653 |
| MSTRG. 3716. 5  | coding    | 0. 137      | 435  | 3966 | 8341 |
| MSTRG. 3716. 6  | coding    | 0. 149      | 0    | 3627 | 8003 |
| MSTRG. 3716. 7  | coding    | 0. 116      | 99   | 3501 | 7676 |
| MSTRG. 3716. 9  | coding    | 0. 115      | 99   | 3300 | 3456 |
| MSTRG. 3725. 1  | noncoding | -0. 0479232 | 2568 | 3000 | 8224 |
| MSTRG. 3733. 3  | noncoding | -0. 0008192 | 333  | 597  | 919  |
| MSTRG. 3737. 2  | coding    | 0. 072      | 903  | 2310 | 3876 |
| MSTRG. 3721. 1  | coding    | 0. 213      | 822  | 1128 | 4753 |

|                |           |             |      |      |       |
|----------------|-----------|-------------|------|------|-------|
| MSTRG. 3721. 2 | coding    | 0. 217      | 822  | 1125 | 1845  |
| MSTRG. 3722. 1 | coding    | 0. 335      | 0    | 1647 | 1873  |
| MSTRG. 3748. 4 | coding    | 0. 417      | 1569 | 2199 | 2718  |
| MSTRG. 3749. 6 | coding    | 0. 404      | 138  | 3093 | 3315  |
| MSTRG. 3749. 7 | coding    | 0. 401      | 0    | 3024 | 3246  |
| MSTRG. 3749. 3 | coding    | 0. 405      | 24   | 3021 | 3243  |
| MSTRG. 3749. 5 | coding    | 0. 4        | 126  | 3126 | 3349  |
| MSTRG. 3755. 1 | noncoding | -0. 028672  | 675  | 741  | 3044  |
| MSTRG. 3764. 2 | coding    | 0. 111      | 360  | 777  | 4984  |
| MSTRG. 3765. 1 | noncoding | -0. 090112  | 651  | 654  | 1041  |
| MSTRG. 3765. 2 | noncoding | -0. 012288  | 1137 | 1254 | 2916  |
| MSTRG. 3767. 1 | noncoding | -0. 036864  | 912  | 984  | 1140  |
| MSTRG. 3768. 1 | noncoding | -0. 0110592 | 501  | 585  | 1081  |
| MSTRG. 3769. 1 | noncoding | -0. 036864  | 594  | 699  | 1333  |
| MSTRG. 3770. 1 | noncoding | -0. 0004096 | 0    | 0    | 925   |
| MSTRG. 3773. 2 | coding    | 0. 342      | 336  | 798  | 1145  |
| MSTRG. 3773. 3 | coding    | 0. 342      | 336  | 798  | 4940  |
| MSTRG. 3773. 4 | coding    | 0. 349      | 2016 | 2505 | 6649  |
| MSTRG. 3777. 2 | noncoding | -0. 024576  | 33   | 156  | 559   |
| MSTRG. 3778. 1 | coding    | 0. 149      | 273  | 1854 | 2126  |
| MSTRG. 3756. 2 | coding    | 0. 032      | 321  | 489  | 968   |
| MSTRG. 3780. 4 | coding    | 0. 094      | 2325 | 2796 | 4142  |
| MSTRG. 3780. 5 | noncoding | -0. 0294912 | 249  | 342  | 1362  |
| MSTRG. 3784. 1 | noncoding | -0. 049152  | 456  | 513  | 776   |
| MSTRG. 3788. 1 | noncoding | -0. 049152  | 1131 | 1188 | 2165  |
| MSTRG. 3789. 1 | coding    | 0. 256      | 1077 | 3864 | 6286  |
| MSTRG. 3789. 3 | coding    | 0. 258      | 1077 | 3837 | 10170 |
| MSTRG. 3790. 1 | noncoding | -0. 0991232 | 1113 | 1557 | 2168  |
| MSTRG. 3800. 1 | coding    | 0. 31       | 108  | 783  | 1010  |
| MSTRG. 3802. 2 | coding    | 0. 371      | 0    | 690  | 1194  |
| MSTRG. 3802. 3 | coding    | 0. 382      | 0    | 690  | 1194  |
| MSTRG. 3802. 4 | coding    | 0. 379      | 0    | 690  | 1193  |
| MSTRG. 3802. 5 | coding    | 0. 379      | 0    | 690  | 1193  |
| MSTRG. 3804. 1 | coding    | 0. 556      | 600  | 3249 | 4148  |
| MSTRG. 3807. 1 | noncoding | -0. 0585728 | 0    | 366  | 1490  |
| MSTRG. 3813. 1 | noncoding | -0. 1265664 | 0    | 798  | 1521  |
| MSTRG. 3817. 3 | coding    | 0. 404      | 144  | 5382 | 6378  |
| MSTRG. 3821. 2 | coding    | 0. 27       | 54   | 3153 | 4799  |
| MSTRG. 3821. 1 | coding    | 0. 268      | 189  | 3282 | 6604  |
| MSTRG. 3821. 4 | coding    | 0. 279      | 0    | 3036 | 3747  |
| MSTRG. 3831. 5 | coding    | 0. 062      | 87   | 1680 | 2136  |
| MSTRG. 3832. 3 | coding    | 0. 071      | 339  | 2235 | 2852  |
| MSTRG. 3832. 4 | coding    | 0. 071      | 657  | 2553 | 3170  |
| MSTRG. 3832. 5 | coding    | 0. 071      | 1266 | 3162 | 3779  |
| MSTRG. 3833. 1 | noncoding | -0. 016384  | 705  | 828  | 985   |
| MSTRG. 3834. 1 | coding    | 0. 064      | 276  | 2016 | 2662  |
| MSTRG. 3834. 2 | coding    | 0. 059      | 234  | 1941 | 6434  |
| MSTRG. 3839. 1 | coding    | 0. 124      | 390  | 1347 | 2323  |
| MSTRG. 3825. 2 | coding    | 0. 142      | 0    | 1458 | 3901  |
| MSTRG. 3825. 1 | coding    | 0. 142      | 0    | 1464 | 3823  |
| MSTRG. 3828. 1 | coding    | 0. 111      | 0    | 1134 | 1449  |
| MSTRG. 3842. 1 | noncoding | -0. 1335296 | 0    | 249  | 6432  |
| MSTRG. 3842. 2 | noncoding | -0. 1335296 | 0    | 249  | 6580  |
| MSTRG. 3842. 3 | coding    | 0. 063      | 4392 | 4620 | 5386  |

|                |           |             |      |      |       |
|----------------|-----------|-------------|------|------|-------|
| MSTRG. 3842. 4 | noncoding | -0. 0004096 | 183  | 252  | 3144  |
| MSTRG. 3842. 6 | coding    | 0. 177      | 57   | 1104 | 1963  |
| MSTRG. 3855. 1 | noncoding | -0. 049152  | 315  | 429  | 4547  |
| MSTRG. 3854. 3 | coding    | 0. 129      | 666  | 1602 | 4598  |
| MSTRG. 3856. 1 | noncoding | -0. 0004096 | 627  | 765  | 1055  |
| MSTRG. 3852. 1 | coding    | 0. 568      | 0    | 1080 | 1365  |
| MSTRG. 3852. 2 | coding    | 0. 568      | 0    | 1080 | 2109  |
| MSTRG. 3868. 1 | noncoding | -0. 0004096 | 0    | 0    | 1703  |
| MSTRG. 3969. 1 | coding    | 0. 016      | 2184 | 2334 | 4659  |
| MSTRG. 3970. 1 | noncoding | -0. 024576  | 360  | 435  | 3249  |
| MSTRG. 3971. 1 | noncoding | -0. 135168  | 2034 | 2112 | 2968  |
| MSTRG. 3975. 1 | noncoding | -0. 0012288 | 1218 | 1251 | 3862  |
| MSTRG. 3976. 1 | coding    | 0. 038      | 174  | 1212 | 2004  |
| MSTRG. 3977. 1 | noncoding | -0. 049152  | 4485 | 4572 | 6824  |
| MSTRG. 3978. 1 | noncoding | -0. 0319488 | 1416 | 1650 | 5107  |
| MSTRG. 3979. 1 | noncoding | -0. 0036864 | 1392 | 1506 | 3486  |
| MSTRG. 3980. 1 | noncoding | -0. 12288   | 69   | 81   | 457   |
| MSTRG. 3972. 5 | noncoding | -0. 02048   | 4020 | 4149 | 11297 |
| MSTRG. 3981. 1 | noncoding | -0. 126976  | 1023 | 1089 | 1480  |
| MSTRG. 3982. 1 | noncoding | -0. 008192  | 1656 | 1659 | 1843  |
| MSTRG. 3983. 1 | noncoding | -0. 024576  | 357  | 447  | 3232  |
| MSTRG. 3983. 2 | noncoding | -0. 0196608 | 162  | 273  | 1166  |
| MSTRG. 3984. 1 | noncoding | -0. 0425984 | 3171 | 3327 | 5506  |
| MSTRG. 3984. 2 | noncoding | -0. 0028672 | 1854 | 1971 | 3276  |
| MSTRG. 3985. 1 | coding    | 0. 07       | 1833 | 2541 | 6073  |
| MSTRG. 3985. 2 | noncoding | -0. 004096  | 2382 | 2418 | 4108  |
| MSTRG. 3972. 6 | noncoding | -0. 0270336 | 2817 | 2979 | 6526  |
| MSTRG. 3986. 1 | noncoding | -0. 016384  | 1254 | 1329 | 1506  |
| MSTRG. 3987. 1 | noncoding | -0. 0212992 | 0    | 60   | 5423  |
| MSTRG. 3987. 2 | noncoding | -0. 0086016 | 180  | 252  | 4246  |
| MSTRG. 3987. 3 | noncoding | -0. 0086016 | 243  | 315  | 3742  |
| MSTRG. 3987. 4 | noncoding | -0. 0004096 | 0    | 0    | 919   |
| MSTRG. 3989. 1 | noncoding | -0. 0135168 | 2397 | 2601 | 5822  |
| MSTRG. 3972. 9 | noncoding | -0. 02048   | 3003 | 3087 | 4446  |
| MSTRG. 3991. 1 | noncoding | -0. 0274432 | 342  | 387  | 1074  |
| MSTRG. 3877. 1 | noncoding | -0. 0196608 | 1140 | 1176 | 3647  |
| MSTRG. 3883. 1 | noncoding | -0. 0606208 | 30   | 51   | 322   |
| MSTRG. 3889. 2 | coding    | 0. 102      | 597  | 1443 | 3206  |
| MSTRG. 3890. 1 | coding    | 0. 117      | 153  | 2088 | 2641  |
| MSTRG. 3893. 1 | noncoding | -0. 1949696 | 2538 | 3408 | 3562  |
| MSTRG. 3895. 3 | coding    | 0. 124      | 108  | 1827 | 2062  |
| MSTRG. 3895. 4 | coding    | 0. 147      | 690  | 2130 | 2362  |
| MSTRG. 3895. 6 | coding    | 0. 12       | 54   | 1260 | 1415  |
| MSTRG. 3895. 7 | coding    | 0. 128      | 690  | 1866 | 2019  |
| MSTRG. 3896. 1 | noncoding | -0. 008192  | 159  | 174  | 339   |
| MSTRG. 3897. 1 | noncoding | -0. 1052672 | 0    | 204  | 1433  |
| MSTRG. 3900. 2 | coding    | 0. 038      | 1224 | 1782 | 3595  |
| MSTRG. 3902. 2 | coding    | 0. 06       | 84   | 1500 | 3980  |
| MSTRG. 3903. 2 | coding    | 0. 123      | 492  | 822  | 2628  |
| MSTRG. 3903. 3 | coding    | 0. 123      | 432  | 762  | 2503  |
| MSTRG. 3903. 4 | coding    | 0. 123      | 492  | 822  | 2325  |
| MSTRG. 3903. 5 | coding    | 0. 02       | 219  | 363  | 6908  |
| MSTRG. 3910. 2 | coding    | 0. 029      | 195  | 2841 | 4152  |
| MSTRG. 3911. 3 | coding    | 0. 042      | 660  | 1278 | 2492  |

|                 |           |             |      |       |       |
|-----------------|-----------|-------------|------|-------|-------|
| MSTRG. 3913. 3  | coding    | 0. 238      | 918  | 2145  | 4599  |
| MSTRG. 3918. 1  | noncoding | -0. 0004096 | 0    | 0     | 688   |
| MSTRG. 3935. 6  | coding    | 0. 052      | 0    | 1038  | 3045  |
| MSTRG. 3935. 5  | noncoding | -0. 0135168 | 1839 | 2016  | 3091  |
| MSTRG. 3935. 7  | noncoding | -0. 0135168 | 1818 | 1995  | 2975  |
| MSTRG. 3935. 8  | coding    | 0. 059      | 219  | 789   | 1962  |
| MSTRG. 3935. 9  | coding    | 0. 102      | 0    | 558   | 2073  |
| MSTRG. 3935. 11 | noncoding | -0. 004096  | 213  | 318   | 2747  |
| MSTRG. 3936. 1  | noncoding | -0. 012288  | 408  | 486   | 816   |
| MSTRG. 3937. 1  | noncoding | -0. 024576  | 2433 | 2535  | 3504  |
| MSTRG. 3930. 1  | noncoding | -0. 11264   | 0    | 9     | 858   |
| MSTRG. 3934. 1  | noncoding | -0. 057344  | 1068 | 1140  | 2109  |
| MSTRG. 3939. 2  | coding    | 0. 229      | 0    | 402   | 1098  |
| MSTRG. 3939. 4  | noncoding | -0. 0004096 | 84   | 174   | 660   |
| MSTRG. 3940. 3  | coding    | 0. 1        | 0    | 867   | 5947  |
| MSTRG. 3940. 6  | coding    | 0. 148      | 462  | 681   | 3306  |
| MSTRG. 3940. 7  | coding    | 0. 148      | 495  | 714   | 3309  |
| MSTRG. 3941. 1  | noncoding | -0. 0057344 | 0    | 3     | 492   |
| MSTRG. 3954. 1  | noncoding | -0. 08192   | 285  | 288   | 448   |
| MSTRG. 3959. 2  | coding    | 0. 081      | 0    | 1872  | 2156  |
| MSTRG. 3960. 1  | noncoding | -0. 045056  | 333  | 375   | 827   |
| MSTRG. 3963. 3  | coding    | 0. 045      | 159  | 3732  | 4101  |
| MSTRG. 3964. 1  | noncoding | -0. 16384   | 303  | 324   | 836   |
| MSTRG. 3963. 6  | coding    | 0. 042      | 282  | 2346  | 2716  |
| MSTRG. 3965. 2  | coding    | 0. 227      | 0    | 735   | 6797  |
| MSTRG. 3993. 2  | coding    | 0. 112      | 30   | 582   | 5195  |
| MSTRG. 3995. 1  | noncoding | -0. 200704  | 264  | 315   | 469   |
| MSTRG. 3997. 3  | noncoding | -0. 0577536 | 0    | 522   | 4775  |
| MSTRG. 3997. 2  | coding    | 0. 175      | 0    | 570   | 24021 |
| MSTRG. 4000. 1  | noncoding | -0. 0004096 | 297  | 435   | 1893  |
| MSTRG. 4003. 1  | coding    | 0. 134      | 1587 | 3030  | 4423  |
| MSTRG. 4003. 3  | coding    | 0. 133      | 384  | 1512  | 5162  |
| MSTRG. 4003. 4  | coding    | 0. 135      | 582  | 2046  | 5696  |
| MSTRG. 4004. 1  | noncoding | -0. 065536  | 4545 | 4629  | 5092  |
| MSTRG. 4006. 1  | coding    | 0. 078      | 9    | 465   | 7922  |
| MSTRG. 4006. 2  | coding    | 0. 077      | 9    | 459   | 2182  |
| MSTRG. 4010. 2  | coding    | 0. 046      | 1872 | 5223  | 6017  |
| MSTRG. 4010. 1  | coding    | 0. 046      | 1266 | 4617  | 5410  |
| MSTRG. 4010. 3  | coding    | 0. 046      | 8736 | 12087 | 16470 |
| MSTRG. 4011. 1  | noncoding | -0. 0008192 | 447  | 588   | 1904  |
| MSTRG. 4010. 6  | noncoding | -0. 045056  | 327  | 387   | 3121  |
| MSTRG. 4014. 1  | noncoding | -0. 0479232 | 0    | 492   | 3180  |
| MSTRG. 4017. 1  | coding    | 0. 056      | 963  | 1218  | 3984  |
| MSTRG. 4017. 3  | coding    | 0. 056      | 582  | 837   | 2570  |
| MSTRG. 4008. 3  | coding    | 0. 152      | 1179 | 2445  | 2598  |
| MSTRG. 4020. 1  | noncoding | -0. 012288  | 3738 | 3810  | 6337  |
| MSTRG. 4023. 2  | coding    | 0. 006      | 1611 | 1758  | 3674  |
| MSTRG. 4024. 2  | coding    | 0. 003      | 222  | 438   | 623   |
| MSTRG. 4024. 4  | coding    | 0. 03       | 222  | 327   | 568   |
| MSTRG. 4024. 5  | coding    | 0. 021      | 216  | 381   | 537   |
| MSTRG. 4026. 1  | coding    | 0. 073      | 1236 | 3078  | 3612  |
| MSTRG. 4026. 2  | coding    | 0. 073      | 1092 | 2934  | 3468  |
| MSTRG. 4026. 3  | coding    | 0. 073      | 1296 | 3138  | 3463  |
| MSTRG. 4026. 4  | coding    | 0. 073      | 2757 | 4599  | 4878  |

|                |           |             |      |      |       |
|----------------|-----------|-------------|------|------|-------|
| MSTRG. 4026. 5 | coding    | 0. 073      | 1326 | 3168 | 3440  |
| MSTRG. 4026. 6 | coding    | 0. 073      | 1080 | 2922 | 3170  |
| MSTRG. 4028. 5 | coding    | 0. 216      | 408  | 2655 | 6035  |
| MSTRG. 4028. 6 | coding    | 0. 207      | 231  | 2586 | 4436  |
| MSTRG. 4028. 7 | coding    | 0. 21       | 297  | 2598 | 4446  |
| MSTRG. 4028. 8 | coding    | 0. 21       | 201  | 2496 | 5876  |
| MSTRG. 4028. 9 | coding    | 0. 207      | 171  | 2532 | 4382  |
| MSTRG. 4030. 3 | noncoding | -0. 0086016 | 1770 | 1923 | 3434  |
| MSTRG. 4036. 1 | noncoding | -0. 0479232 | 33   | 426  | 6704  |
| MSTRG. 4037. 1 | noncoding | -0. 0004096 | 0    | 0    | 314   |
| MSTRG. 4047. 3 | noncoding | -0. 0786432 | 318  | 648  | 5667  |
| MSTRG. 4047. 4 | noncoding | -0. 0397312 | 54   | 300  | 1669  |
| MSTRG. 4047. 5 | noncoding | -0. 0479232 | 5274 | 5469 | 5624  |
| MSTRG. 4047. 6 | noncoding | -0. 0487424 | 4527 | 4698 | 4852  |
| MSTRG. 4047. 7 | noncoding | -0. 0602112 | 0    | 297  | 4202  |
| MSTRG. 4047. 8 | coding    | 0. 079      | 6591 | 6978 | 8437  |
| MSTRG. 4047. 9 | coding    | 0. 016      | 2733 | 3009 | 3825  |
| MSTRG. 4038. 1 | noncoding | -0. 090112  | 1626 | 1710 | 1866  |
| MSTRG. 4051. 1 | coding    | 0. 089      | 3363 | 3540 | 3991  |
| MSTRG. 4051. 2 | noncoding | -0. 0454656 | 7047 | 7230 | 11712 |
| MSTRG. 4052. 4 | coding    | 0. 121      | 396  | 1350 | 2075  |
| MSTRG. 4053. 1 | coding    | 0. 152      | 813  | 1167 | 2594  |
| MSTRG. 4055. 1 | noncoding | -0. 057344  | 393  | 651  | 806   |
| MSTRG. 4058. 1 | coding    | 0. 258      | 330  | 2634 | 6582  |
| MSTRG. 4058. 5 | coding    | 0. 265      | 330  | 2523 | 5031  |
| MSTRG. 4072. 1 | coding    | 0. 292      | 36   | 1797 | 2120  |
| MSTRG. 4072. 3 | coding    | 0. 238      | 0    | 189  | 344   |
| MSTRG. 4074. 1 | coding    | 0. 166      | 0    | 216  | 369   |
| MSTRG. 4079. 1 | coding    | 0. 236      | 0    | 153  | 2367  |
| MSTRG. 4080. 1 | noncoding | -0. 022528  | 186  | 270  | 427   |
| MSTRG. 4081. 1 | coding    | 0. 215      | 438  | 1191 | 3913  |
| MSTRG. 4082. 1 | noncoding | -0. 0475136 | 75   | 240  | 611   |
| MSTRG. 4083. 1 | coding    | 0. 242      | 117  | 939  | 1718  |
| MSTRG. 4068. 2 | coding    | 0. 09       | 204  | 963  | 3405  |
| MSTRG. 4070. 1 | noncoding | -0. 0004096 | 0    | 0    | 399   |
| MSTRG. 4092. 3 | noncoding | -0. 0991232 | 2304 | 2853 | 17295 |
| MSTRG. 4092. 4 | coding    | 0. 12       | 9069 | 9315 | 10095 |
| MSTRG. 4093. 1 | noncoding | -0. 004096  | 2691 | 2913 | 3740  |
| MSTRG. 4093. 2 | noncoding | -0. 053248  | 57   | 96   | 271   |
| MSTRG. 4094. 1 | noncoding | -0. 0032768 | 1926 | 1971 | 4358  |
| MSTRG. 4095. 1 | noncoding | -0. 012288  | 507  | 648  | 1479  |
| MSTRG. 4096. 1 | noncoding | -0. 0004096 | 0    | 0    | 4472  |
| MSTRG. 4092. 5 | coding    | 0. 021      | 4569 | 4866 | 8876  |
| MSTRG. 4092. 6 | noncoding | -0. 0360448 | 8004 | 8418 | 8574  |
| MSTRG. 4092. 7 | noncoding | -0. 114688  | 1170 | 1221 | 1377  |
| MSTRG. 4092. 8 | noncoding | -0. 1605632 | 0    | 60   | 2232  |
| MSTRG. 4099. 1 | coding    | 0. 358      | 0    | 267  | 6881  |
| MSTRG. 4104. 1 | noncoding | -0. 04096   | 258  | 321  | 1411  |
| MSTRG. 4108. 1 | coding    | 0. 061      | 411  | 1929 | 2319  |
| MSTRG. 4108. 2 | coding    | 0. 037      | 357  | 1716 | 2106  |
| MSTRG. 4108. 3 | coding    | 0. 037      | 2550 | 3909 | 4191  |
| MSTRG. 4108. 6 | noncoding | -0. 1175552 | 996  | 1023 | 2034  |
| MSTRG. 4108. 5 | coding    | 0. 061      | 135  | 1653 | 2044  |
| MSTRG. 4116. 1 | coding    | 0. 075      | 1341 | 1620 | 4131  |

|                |           |             |      |      |      |
|----------------|-----------|-------------|------|------|------|
| MSTRG. 4122. 3 | coding    | 0. 031      | 4026 | 4611 | 4829 |
| MSTRG. 4122. 2 | coding    | 0. 038      | 750  | 2403 | 2987 |
| MSTRG. 4122. 1 | coding    | 0. 071      | 1320 | 3864 | 8733 |
| MSTRG. 4125. 3 | coding    | 0. 274      | 258  | 1164 | 2518 |
| MSTRG. 4129. 4 | coding    | 0. 076      | 516  | 1749 | 2607 |
| MSTRG. 4129. 7 | coding    | 0. 076      | 552  | 1785 | 2643 |
| MSTRG. 4129. 8 | coding    | 0. 076      | 1281 | 2514 | 3375 |
| MSTRG. 4129. 9 | coding    | 0. 074      | 1281 | 2511 | 3369 |
| MSTRG. 4130. 1 | noncoding | -0. 02048   | 5349 | 5478 | 9426 |
| MSTRG. 4143. 2 | coding    | 0. 084      | 552  | 819  | 2137 |
| MSTRG. 4143. 4 | noncoding | -0. 0004096 | 0    | 0    | 426  |
| MSTRG. 4143. 3 | noncoding | -0. 036864  | 1308 | 1488 | 1895 |
| MSTRG. 4144. 1 | noncoding | -0. 0004096 | 0    | 0    | 366  |
| MSTRG. 4143. 6 | coding    | 0. 09       | 2109 | 2322 | 4200 |
| MSTRG. 4146. 2 | coding    | 0. 055      | 387  | 549  | 1475 |
| MSTRG. 4147. 1 | noncoding | -0. 049152  | 204  | 321  | 496  |
| MSTRG. 4152. 2 | coding    | 0. 097      | 165  | 369  | 1494 |
| MSTRG. 4131. 1 | noncoding | -0. 0212992 | 147  | 342  | 496  |
| MSTRG. 4132. 3 | coding    | 0. 067      | 159  | 1233 | 3703 |
| MSTRG. 4132. 5 | coding    | 0. 067      | 159  | 1233 | 3482 |
| MSTRG. 4132. 6 | coding    | 0. 066      | 159  | 1230 | 1571 |
| MSTRG. 4133. 1 | noncoding | -0. 0499712 | 1083 | 1290 | 9020 |
| MSTRG. 4134. 1 | noncoding | -0. 0069632 | 213  | 489  | 4348 |
| MSTRG. 4139. 1 | noncoding | -0. 053248  | 4371 | 4449 | 5900 |
| MSTRG. 4163. 2 | coding    | 0. 249      | 4560 | 5226 | 7000 |
| MSTRG. 4163. 1 | coding    | 0. 057      | 120  | 5286 | 7061 |
| MSTRG. 4163. 3 | coding    | 0. 178      | 3    | 969  | 2609 |
| MSTRG. 4163. 4 | coding    | 0. 07       | 276  | 4410 | 5810 |
| MSTRG. 4163. 5 | coding    | 0. 249      | 3696 | 4362 | 5763 |
| MSTRG. 4163. 6 | coding    | 0. 249      | 6156 | 6873 | 7637 |
| MSTRG. 4163. 7 | coding    | 0. 07       | 288  | 4422 | 5138 |
| MSTRG. 4162. 1 | noncoding | -0. 0004096 | 0    | 0    | 216  |
| MSTRG. 4178. 5 | coding    | 0. 047      | 5292 | 6090 | 8196 |
| MSTRG. 4178. 3 | coding    | 0. 047      | 5301 | 6099 | 9969 |
| MSTRG. 4178. 6 | coding    | 0. 089      | 120  | 741  | 1220 |
| MSTRG. 4178. 4 | coding    | 0. 069      | 360  | 741  | 1221 |
| MSTRG. 4178. 8 | coding    | 0. 048      | 405  | 804  | 1283 |
| MSTRG. 4178. 7 | coding    | 0. 089      | 933  | 1554 | 2033 |
| MSTRG. 4183. 1 | noncoding | -0. 065536  | 267  | 297  | 2082 |
| MSTRG. 4186. 1 | noncoding | -0. 0434176 | 1965 | 2031 | 7118 |
| MSTRG. 4186. 2 | noncoding | -0. 0434176 | 1344 | 1410 | 3836 |
| MSTRG. 4186. 3 | noncoding | -0. 028672  | 1233 | 1317 | 1528 |
| MSTRG. 4187. 1 | noncoding | -0. 0004096 | 528  | 573  | 833  |
| MSTRG. 4203. 3 | noncoding | -0. 139264  | 354  | 399  | 1252 |
| MSTRG. 4203. 5 | noncoding | -0. 08192   | 318  | 321  | 830  |
| MSTRG. 4203. 2 | noncoding | -0. 028672  | 2457 | 2511 | 2675 |
| MSTRG. 4203. 6 | noncoding | -0. 0110592 | 765  | 792  | 1142 |
| MSTRG. 4203. 7 | noncoding | -0. 045056  | 279  | 318  | 2374 |
| MSTRG. 4213. 3 | coding    | 0. 174      | 225  | 537  | 1406 |
| MSTRG. 4214. 1 | noncoding | -0. 014336  | 1026 | 1155 | 2634 |
| MSTRG. 4216. 1 | noncoding | -0. 0004096 | 0    | 0    | 592  |
| MSTRG. 4217. 3 | coding    | 0. 085      | 57   | 339  | 894  |
| MSTRG. 4226. 1 | coding    | 0. 094      | 150  | 1881 | 4110 |
| MSTRG. 4226. 2 | coding    | 0. 029      | 66   | 1377 | 2213 |



|                |           |             |       |       |       |
|----------------|-----------|-------------|-------|-------|-------|
| MSTRG. 4227. 1 | noncoding | -0. 02048   | 339   | 381   | 910   |
| MSTRG. 4226. 3 | coding    | 0. 014      | 396   | 1230  | 2215  |
| MSTRG. 4228. 7 | coding    | 0. 143      | 2478  | 2889  | 8390  |
| MSTRG. 4228. 3 | noncoding | -0. 0557056 | 2478  | 2868  | 7748  |
| MSTRG. 4229. 4 | coding    | 0. 165      | 0     | 237   | 4684  |
| MSTRG. 4229. 2 | coding    | 0. 165      | 0     | 237   | 5730  |
| MSTRG. 4229. 3 | noncoding | -0. 067584  | 0     | 237   | 3002  |
| MSTRG. 4230. 1 | noncoding | -0. 0004096 | 123   | 207   | 936   |
| MSTRG. 4231. 1 | noncoding | -0. 0004096 | 0     | 0     | 219   |
| MSTRG. 4219. 1 | noncoding | -0. 151552  | 0     | 45    | 289   |
| MSTRG. 4246. 3 | coding    | 0. 01       | 348   | 456   | 1489  |
| MSTRG. 4250. 5 | noncoding | -0. 028672  | 111   | 228   | 2986  |
| MSTRG. 4256. 1 | coding    | 0. 236      | 0     | 1101  | 3455  |
| MSTRG. 4256. 3 | coding    | 0. 254      | 0     | 1098  | 7198  |
| MSTRG. 4256. 2 | coding    | 0. 266      | 0     | 1080  | 7201  |
| MSTRG. 4256. 4 | coding    | 0. 239      | 0     | 1143  | 7356  |
| MSTRG. 4257. 1 | noncoding | -0. 0606208 | 0     | 156   | 378   |
| MSTRG. 4260. 3 | coding    | 0. 223      | 303   | 1110  | 2205  |
| MSTRG. 4260. 4 | coding    | 0. 13       | 2106  | 3555  | 3833  |
| MSTRG. 4261. 3 | coding    | 0. 058      | 846   | 2043  | 4077  |
| MSTRG. 4261. 2 | coding    | 0. 058      | 765   | 1962  | 4018  |
| MSTRG. 4261. 4 | coding    | 0. 058      | 681   | 1878  | 3911  |
| MSTRG. 4262. 1 | noncoding | -0. 118784  | 6     | 90    | 348   |
| MSTRG. 4293. 3 | noncoding | -0. 053248  | 702   | 786   | 941   |
| MSTRG. 4293. 4 | noncoding | -0. 053248  | 1083  | 1167  | 1323  |
| MSTRG. 4293. 5 | noncoding | -0. 053248  | 867   | 951   | 1107  |
| MSTRG. 4293. 6 | noncoding | -0. 053248  | 921   | 1005  | 1161  |
| MSTRG. 4293. 7 | noncoding | -0. 053248  | 804   | 888   | 1043  |
| MSTRG. 4296. 1 | noncoding | -0. 008192  | 441   | 522   | 1111  |
| MSTRG. 4301. 2 | coding    | 0. 367      | 162   | 2064  | 2969  |
| MSTRG. 4301. 1 | coding    | 0. 363      | 141   | 1917  | 2822  |
| MSTRG. 4301. 3 | coding    | 0. 367      | 135   | 2037  | 2924  |
| MSTRG. 4301. 4 | coding    | 0. 365      | 114   | 2007  | 2483  |
| MSTRG. 4301. 5 | coding    | 0. 395      | 0     | 1695  | 2032  |
| MSTRG. 4301. 6 | coding    | 0. 367      | 120   | 2022  | 2860  |
| MSTRG. 4302. 1 | noncoding | -0. 0802816 | 390   | 1092  | 2460  |
| MSTRG. 4303. 2 | noncoding | -0. 045056  | 3393  | 3498  | 4891  |
| MSTRG. 4304. 2 | noncoding | -0. 057344  | 1158  | 1212  | 1468  |
| MSTRG. 4297. 1 | noncoding | -0. 004096  | 474   | 504   | 799   |
| MSTRG. 4298. 1 | noncoding | -0. 0139264 | 654   | 738   | 894   |
| MSTRG. 4312. 5 | noncoding | -0. 1552384 | 0     | 186   | 1450  |
| MSTRG. 4312. 4 | coding    | 0. 077      | 2742  | 6291  | 7020  |
| MSTRG. 4312. 2 | coding    | 0. 062      | 0     | 6297  | 9709  |
| MSTRG. 4312. 1 | coding    | 0. 062      | 0     | 6297  | 15143 |
| MSTRG. 4312. 3 | coding    | 0. 062      | 0     | 6297  | 11509 |
| MSTRG. 4310. 2 | noncoding | -0. 028672  | 48    | 126   | 2552  |
| MSTRG. 4317. 2 | coding    | 0. 156      | 267   | 1728  | 8555  |
| MSTRG. 4319. 1 | coding    | 0. 074      | 8859  | 9396  | 23271 |
| MSTRG. 4319. 2 | coding    | 0. 074      | 46020 | 46557 | 60402 |
| MSTRG. 4319. 3 | noncoding | -0. 0401408 | 2139  | 2295  | 9501  |
| MSTRG. 4319. 4 | noncoding | -0. 034816  | 780   | 1041  | 24222 |
| MSTRG. 4319. 5 | noncoding | -0. 032768  | 0     | 90    | 1952  |
| MSTRG. 4325. 2 | coding    | 0. 271      | 261   | 1125  | 3448  |
| MSTRG. 4325. 3 | coding    | 0. 345      | 0     | 288   | 823   |

|               |           |            |       |       |       |
|---------------|-----------|------------|-------|-------|-------|
| MSTRG.4326.2  | noncoding | -0.008192  | 1089  | 1350  | 1696  |
| MSTRG.4328.2  | coding    | 0.192      | 0     | 1029  | 8106  |
| MSTRG.4328.6  | coding    | 0.233      | 0     | 822   | 5472  |
| MSTRG.4328.5  | coding    | 0.192      | 0     | 1290  | 1443  |
| MSTRG.4328.7  | coding    | 0.256      | 0     | 687   | 1676  |
| MSTRG.4328.11 | coding    | 0.263      | 0     | 681   | 7757  |
| MSTRG.4329.3  | coding    | 0.163      | 0     | 2262  | 5574  |
| MSTRG.4330.1  | noncoding | -0.0004096 | 0     | 0     | 519   |
| MSTRG.4335.2  | coding    | 0.077      | 0     | 2352  | 6217  |
| MSTRG.4341.1  | noncoding | -0.0135168 | 480   | 642   | 1028  |
| MSTRG.4341.2  | noncoding | -0.028672  | 51    | 207   | 579   |
| MSTRG.4341.3  | noncoding | -0.0237568 | 285   | 441   | 1079  |
| MSTRG.4343.1  | coding    | 0.19       | 0     | 1776  | 3457  |
| MSTRG.4344.1  | noncoding | -0.065536  | 558   | 633   | 1772  |
| MSTRG.4340.1  | noncoding | -0.0004096 | 264   | 264   | 421   |
| MSTRG.4346.2  | coding    | 0.088      | 90    | 345   | 3365  |
| MSTRG.4345.1  | coding    | 0.283      | 282   | 1620  | 3128  |
| MSTRG.4359.2  | coding    | 0.147      | 0     | 7875  | 10549 |
| MSTRG.4357.1  | coding    | 0.474      | 0     | 1521  | 4134  |
| MSTRG.4358.2  | coding    | 0.306      | 144   | 1119  | 1318  |
| MSTRG.4360.2  | coding    | 0.333      | 54    | 1491  | 3906  |
| MSTRG.4361.1  | coding    | 0.156      | 318   | 1251  | 4747  |
| MSTRG.4361.3  | coding    | 0.17       | 354   | 999   | 1797  |
| MSTRG.4363.1  | coding    | 0.473      | 324   | 2262  | 3835  |
| MSTRG.4363.2  | coding    | 0.516      | 0     | 1809  | 8114  |
| MSTRG.4363.3  | coding    | 0.5        | 690   | 2490  | 2786  |
| MSTRG.4367.4  | noncoding | -0.0372736 | 6264  | 6717  | 7030  |
| MSTRG.4367.5  | noncoding | -0.0380928 | 2298  | 2871  | 40314 |
| MSTRG.4369.1  | noncoding | -0.0671744 | 20808 | 21129 | 25459 |
| MSTRG.4365.2  | noncoding | -0.0765952 | 24    | 237   | 523   |
| MSTRG.4371.1  | noncoding | -0.008192  | 633   | 762   | 1055  |
| MSTRG.4371.2  | noncoding | -0.008192  | 615   | 744   | 1035  |
| MSTRG.4375.1  | noncoding | -0.0126976 | 567   | 726   | 971   |
| MSTRG.4372.2  | coding    | 0.01       | 1110  | 1350  | 4535  |
| MSTRG.4382.1  | noncoding | -0.0004096 | 777   | 786   | 942   |
| MSTRG.4388.1  | coding    | 0.443      | 0     | 2238  | 7138  |
| MSTRG.4388.3  | coding    | 0.476      | 0     | 2661  | 7561  |
| MSTRG.4388.9  | coding    | 0.432      | 0     | 2277  | 7177  |
| MSTRG.4384.2  | coding    | 0.202      | 18    | 336   | 767   |
| MSTRG.4390.1  | noncoding | -0.0598016 | 1131  | 1416  | 2047  |
| MSTRG.4390.2  | noncoding | -0.0598016 | 948   | 1233  | 1610  |
| MSTRG.4390.3  | noncoding | -0.0598016 | 891   | 1176  | 1547  |
| MSTRG.4399.1  | noncoding | -0.0004096 | 0     | 0     | 572   |
| MSTRG.4400.2  | coding    | 0.121      | 0     | 1233  | 2298  |
| MSTRG.4401.2  | noncoding | -0.0512    | 8964  | 9285  | 10257 |
| MSTRG.4401.3  | coding    | 0.028      | 1236  | 2871  | 10085 |
| MSTRG.4399.3  | coding    | 0.431      | 0     | 822   | 1451  |
| MSTRG.4401.5  | noncoding | -0.0512    | 10449 | 10770 | 11743 |
| MSTRG.4401.8  | noncoding | -0.0512    | 9945  | 10266 | 11124 |
| MSTRG.4401.9  | noncoding | -0.0118784 | 9663  | 9831  | 12847 |
| MSTRG.4401.11 | noncoding | -0.0180224 | 5595  | 5754  | 10238 |
| MSTRG.4401.12 | noncoding | -0.0180224 | 5595  | 5754  | 10301 |
| MSTRG.4401.10 | noncoding | -0.0118784 | 9651  | 9819  | 12938 |
| MSTRG.4401.13 | noncoding | -0.0360448 | 9984  | 10281 | 10437 |

|                 |           |             |       |       |       |
|-----------------|-----------|-------------|-------|-------|-------|
| MSTRG. 4401. 14 | noncoding | -0. 0360448 | 9921  | 10218 | 10374 |
| MSTRG. 4401. 16 | noncoding | -0. 0528384 | 7122  | 7365  | 7520  |
| MSTRG. 4403. 1  | coding    | 0. 103      | 1011  | 1530  | 2843  |
| MSTRG. 4403. 3  | coding    | 0. 042      | 639   | 4932  | 7094  |
| MSTRG. 4404. 1  | noncoding | -0. 004096  | 846   | 981   | 2672  |
| MSTRG. 4408. 1  | noncoding | -0. 077824  | 2028  | 2094  | 2370  |
| MSTRG. 4409. 2  | coding    | 0. 179      | 429   | 2877  | 3130  |
| MSTRG. 4409. 3  | coding    | 0. 183      | 132   | 2418  | 2671  |
| MSTRG. 4411. 1  | coding    | 0. 399      | 582   | 2682  | 10320 |
| MSTRG. 4411. 2  | coding    | 0. 399      | 543   | 2643  | 8836  |
| MSTRG. 4412. 1  | coding    | 0. 082      | 0     | 4599  | 4766  |
| MSTRG. 4412. 2  | coding    | 0. 086      | 0     | 4428  | 4582  |
| MSTRG. 4412. 3  | coding    | 0. 077      | 210   | 4230  | 4386  |
| MSTRG. 4413. 1  | coding    | 0. 078      | 111   | 711   | 5657  |
| MSTRG. 4413. 2  | coding    | 0. 06       | 207   | 621   | 3466  |
| MSTRG. 4413. 5  | coding    | 0. 062      | 357   | 582   | 1108  |
| MSTRG. 4414. 2  | coding    | 0. 203      | 255   | 651   | 1495  |
| MSTRG. 4418. 1  | coding    | 0. 201      | 165   | 3507  | 4176  |
| MSTRG. 4420. 9  | coding    | 0. 057      | 3453  | 4779  | 5535  |
| MSTRG. 4420. 10 | coding    | 0. 083      | 8298  | 10476 | 11231 |
| MSTRG. 4420. 11 | coding    | 0. 057      | 3609  | 4935  | 5419  |
| MSTRG. 4421. 1  | noncoding | -0. 12288   | 3255  | 3297  | 5550  |
| MSTRG. 4422. 1  | noncoding | -0. 0352256 | 27    | 204   | 359   |
| MSTRG. 4422. 2  | noncoding | -0. 0258048 | 24    | 192   | 346   |
| MSTRG. 4423. 4  | coding    | 0. 135      | 0     | 2226  | 3173  |
| MSTRG. 4423. 5  | coding    | 0. 122      | 576   | 3165  | 3930  |
| MSTRG. 4424. 1  | noncoding | -0. 12288   | 84    | 99    | 255   |
| MSTRG. 4426. 4  | coding    | 0. 399      | 558   | 1767  | 2799  |
| MSTRG. 4428. 2  | coding    | 0. 221      | 0     | 531   | 2232  |
| MSTRG. 4429. 1  | noncoding | -0. 012288  | 678   | 888   | 1936  |
| MSTRG. 4431. 1  | noncoding | -0. 196608  | 660   | 681   | 1648  |
| MSTRG. 4432. 2  | coding    | 0. 177      | 1026  | 1503  | 1968  |
| MSTRG. 4434. 1  | coding    | 0. 063      | 1011  | 1128  | 1995  |
| MSTRG. 4446. 2  | coding    | 0. 2        | 0     | 411   | 989   |
| MSTRG. 4446. 1  | coding    | 0. 288      | 0     | 1467  | 1676  |
| MSTRG. 4446. 4  | coding    | 0. 286      | 0     | 1497  | 1684  |
| MSTRG. 4448. 1  | coding    | 0. 092      | 12906 | 13419 | 28325 |
| MSTRG. 4448. 2  | coding    | 0. 017      | 3864  | 4434  | 6046  |
| MSTRG. 4449. 1  | noncoding | -0. 0356352 | 819   | 912   | 6784  |
| MSTRG. 4450. 1  | noncoding | -0. 073728  | 381   | 438   | 835   |
| MSTRG. 4451. 1  | noncoding | -0. 0094208 | 1173  | 1308  | 2684  |
| MSTRG. 4452. 1  | coding    | 0. 079      | 654   | 846   | 2549  |
| MSTRG. 4454. 1  | noncoding | -0. 083968  | 498   | 561   | 938   |
| MSTRG. 4456. 1  | noncoding | -0. 090112  | 57    | 75    | 248   |
| MSTRG. 4443. 3  | noncoding | -0. 0282624 | 711   | 975   | 1192  |
| MSTRG. 4445. 1  | noncoding | -0. 024576  | 1446  | 1713  | 3568  |
| MSTRG. 4462. 1  | noncoding | -0. 0569344 | 774   | 957   | 10178 |
| MSTRG. 4462. 2  | noncoding | -0. 0745472 | 3222  | 3405  | 12615 |
| MSTRG. 4463. 1  | noncoding | -0. 0282624 | 1290  | 1683  | 4867  |
| MSTRG. 4464. 1  | noncoding | -0. 016384  | 93    | 234   | 970   |
| MSTRG. 4465. 1  | noncoding | -0. 114688  | 33    | 39    | 304   |
| MSTRG. 4467. 4  | coding    | 0. 165      | 192   | 1068  | 4463  |
| MSTRG. 4470. 3  | coding    | 0. 668      | 0     | 291   | 3630  |
| MSTRG. 4470. 4  | coding    | 0. 686      | 0     | 282   | 3761  |

|                 |           |             |       |       |       |
|-----------------|-----------|-------------|-------|-------|-------|
| MSTRG. 4470. 5  | coding    | 0. 686      | 0     | 282   | 2230  |
| MSTRG. 4473. 3  | coding    | 0. 357      | 468   | 1419  | 2841  |
| MSTRG. 4471. 2  | noncoding | -0. 0299008 | 0     | 414   | 570   |
| MSTRG. 4471. 1  | noncoding | -0. 0610304 | 330   | 591   | 840   |
| MSTRG. 4474. 5  | coding    | 0. 251      | 1977  | 4320  | 4474  |
| MSTRG. 4474. 4  | coding    | 0. 341      | 1467  | 3582  | 3737  |
| MSTRG. 4474. 7  | coding    | 0. 341      | 12927 | 15042 | 15197 |
| MSTRG. 4474. 8  | coding    | 0. 237      | 0     | 1029  | 9348  |
| MSTRG. 4474. 10 | coding    | 0. 193      | 2460  | 3399  | 4745  |
| MSTRG. 4474. 12 | coding    | 0. 234      | 1518  | 2235  | 4098  |
| MSTRG. 4474. 13 | coding    | 0. 234      | 1518  | 2235  | 3517  |
| MSTRG. 4474. 14 | coding    | 0. 234      | 1518  | 2235  | 3899  |
| MSTRG. 4474. 11 | coding    | 0. 234      | 1518  | 2235  | 4795  |
| MSTRG. 4479. 6  | noncoding | -0. 0114688 | 501   | 696   | 1018  |
| MSTRG. 4479. 4  | noncoding | -0. 0667648 | 474   | 1392  | 1576  |
| MSTRG. 4479. 7  | noncoding | -0. 0958464 | 543   | 1014  | 1330  |
| MSTRG. 4479. 2  | noncoding | -0. 0606208 | 0     | 1557  | 1879  |
| MSTRG. 4479. 1  | noncoding | -0. 0561152 | 78    | 300   | 624   |
| MSTRG. 4480. 2  | coding    | 0. 205      | 0     | 339   | 2453  |
| MSTRG. 4481. 4  | coding    | 0. 269      | 615   | 2838  | 10153 |
| MSTRG. 4481. 5  | coding    | 0. 252      | 621   | 2904  | 12175 |
| MSTRG. 4481. 1  | coding    | 0. 268      | 624   | 2793  | 12065 |
| MSTRG. 4481. 2  | coding    | 0. 268      | 624   | 2793  | 11335 |
| MSTRG. 4477. 2  | coding    | 0. 424      | 345   | 2301  | 2997  |
| MSTRG. 4477. 3  | coding    | 0. 418      | 627   | 2493  | 3189  |
| MSTRG. 4477. 4  | coding    | 0. 413      | 339   | 2355  | 3050  |
| MSTRG. 4487. 1  | coding    | 0. 259      | 0     | 1281  | 4772  |
| MSTRG. 4488. 1  | noncoding | -0. 032768  | 9783  | 9852  | 14126 |
| MSTRG. 4488. 2  | noncoding | -0. 032768  | 6111  | 6180  | 7700  |
| MSTRG. 4488. 3  | noncoding | -0. 032768  | 477   | 546   | 1556  |
| MSTRG. 4494. 1  | coding    | 0. 071      | 15159 | 15723 | 15951 |
| MSTRG. 4495. 1  | coding    | 0. 118      | 5130  | 5505  | 6450  |
| MSTRG. 4494. 8  | coding    | 0. 032      | 2364  | 2847  | 3001  |
| MSTRG. 4494. 9  | coding    | 0. 148      | 960   | 1218  | 2030  |
| MSTRG. 4496. 1  | coding    | 0. 127      | 0     | 150   | 2031  |
| MSTRG. 4494. 10 | coding    | 0. 068      | 9690  | 10248 | 11302 |
| MSTRG. 4494. 11 | noncoding | -0. 0004096 | 99    | 195   | 7615  |
| MSTRG. 4498. 1  | noncoding | -0. 0045056 | 2517  | 2670  | 8408  |
| MSTRG. 4494. 12 | coding    | 0. 161      | 543   | 1797  | 2845  |
| MSTRG. 4494. 13 | coding    | 0. 026      | 1044  | 1254  | 1827  |
| MSTRG. 4499. 3  | coding    | 0. 191      | 0     | 1140  | 1754  |
| MSTRG. 4483. 6  | coding    | 0. 232      | 336   | 2586  | 3492  |
| MSTRG. 4483. 4  | coding    | 0. 209      | 27    | 1464  | 6414  |
| MSTRG. 4483. 5  | coding    | 0. 236      | 96    | 2400  | 3306  |
| MSTRG. 4483. 3  | coding    | 0. 239      | 555   | 2799  | 3710  |
| MSTRG. 4503. 1  | noncoding | -0. 049152  | 270   | 393   | 546   |
| MSTRG. 4504. 5  | coding    | 0. 271      | 2655  | 4281  | 5273  |
| MSTRG. 4506. 1  | noncoding | -0. 0118784 | 135   | 279   | 473   |
| MSTRG. 4515. 1  | coding    | 0. 374      | 0     | 3831  | 4499  |
| MSTRG. 4516. 2  | noncoding | -0. 0057344 | 81    | 150   | 509   |
| MSTRG. 4516. 1  | noncoding | -0. 0057344 | 81    | 150   | 562   |
| MSTRG. 4520. 2  | coding    | 0. 3        | 2439  | 4446  | 5089  |
| MSTRG. 4520. 4  | coding    | 0. 308      | 2439  | 4323  | 4812  |
| MSTRG. 4521. 1  | noncoding | -0. 008192  | 327   | 465   | 853   |

|                 |           |             |      |      |      |
|-----------------|-----------|-------------|------|------|------|
| MSTRG. 4533. 11 | coding    | 0. 316      | 528  | 1200 | 2131 |
| MSTRG. 4533. 7  | coding    | 0. 3        | 492  | 1089 | 2021 |
| MSTRG. 4533. 10 | coding    | 0. 444      | 0    | 396  | 1950 |
| MSTRG. 4533. 3  | coding    | 0. 365      | 66   | 915  | 1847 |
| MSTRG. 4533. 1  | coding    | 0. 352      | 96   | 1230 | 2161 |
| MSTRG. 4533. 2  | coding    | 0. 374      | 96   | 1152 | 2083 |
| MSTRG. 4533. 4  | coding    | 0. 315      | 0    | 1233 | 2165 |
| MSTRG. 4533. 8  | coding    | 0. 345      | 96   | 1026 | 1957 |
| MSTRG. 4533. 6  | coding    | 0. 371      | 171  | 1023 | 1956 |
| MSTRG. 4533. 5  | coding    | 0. 426      | 0    | 846  | 1778 |
| MSTRG. 4523. 3  | coding    | 0. 229      | 507  | 1185 | 1706 |
| MSTRG. 4523. 4  | coding    | 0. 229      | 495  | 1173 | 1543 |
| MSTRG. 4524. 1  | noncoding | -0. 0540672 | 864  | 1245 | 6065 |
| MSTRG. 4525. 1  | noncoding | -0. 0405504 | 1239 | 1632 | 2100 |
| MSTRG. 4538. 1  | noncoding | -0. 02048   | 237  | 336  | 492  |
| MSTRG. 4540. 1  | coding    | 0. 379      | 126  | 624  | 781  |
| MSTRG. 4541. 2  | coding    | 0. 263      | 183  | 1134 | 1454 |
| MSTRG. 4549. 1  | noncoding | -0. 110592  | 438  | 444  | 686  |
| MSTRG. 4552. 4  | coding    | 0. 346      | 609  | 3486 | 4189 |
| MSTRG. 4553. 1  | noncoding | -0. 0126976 | 774  | 1023 | 3148 |
| MSTRG. 4543. 2  | coding    | 0. 608      | 72   | 5547 | 7212 |
| MSTRG. 4543. 3  | coding    | 0. 612      | 2184 | 7779 | 8005 |
| MSTRG. 4562. 2  | coding    | 0. 239      | 0    | 702  | 6993 |
| MSTRG. 4562. 3  | coding    | 0. 222      | 1350 | 2100 | 4153 |
| MSTRG. 4564. 1  | coding    | 0. 312      | 180  | 1761 | 2217 |
| MSTRG. 4555. 2  | coding    | 0. 387      | 138  | 3894 | 4100 |
| MSTRG. 4557. 1  | noncoding | -0. 2052096 | 6    | 15   | 348  |
| MSTRG. 4559. 3  | coding    | 0. 237      | 486  | 783  | 1214 |
| MSTRG. 4571. 1  | coding    | 0. 146      | 306  | 684  | 2916 |
| MSTRG. 4572. 1  | noncoding | -0. 014336  | 4020 | 4224 | 6422 |
| MSTRG. 4574. 1  | noncoding | -0. 0438272 | 24   | 234  | 1177 |
| MSTRG. 4578. 1  | noncoding | -0. 0536576 | 63   | 252  | 673  |
| MSTRG. 4578. 3  | noncoding | -0. 0905216 | 0    | 207  | 629  |
| MSTRG. 4579. 2  | coding    | 0. 135      | 0    | 852  | 1048 |
| MSTRG. 4580. 2  | coding    | 0. 178      | 342  | 864  | 1306 |
| MSTRG. 4592. 1  | coding    | 0. 308      | 615  | 1686 | 2223 |
| MSTRG. 4592. 2  | coding    | 0. 296      | 348  | 1413 | 1786 |
| MSTRG. 4594. 1  | coding    | 0. 178      | 2703 | 4233 | 4929 |
| MSTRG. 4594. 2  | coding    | 0. 156      | 0    | 3828 | 4526 |
| MSTRG. 4594. 4  | coding    | 0. 156      | 1194 | 3321 | 3902 |
| MSTRG. 4594. 6  | coding    | 0. 188      | 1281 | 1917 | 2323 |
| MSTRG. 4594. 5  | coding    | 0. 148      | 2256 | 4668 | 5073 |
| MSTRG. 4594. 7  | coding    | 0. 184      | 8442 | 9423 | 9802 |
| MSTRG. 4595. 1  | noncoding | -0. 073728  | 1662 | 1713 | 6305 |
| MSTRG. 4594. 9  | noncoding | -0. 1024    | 3651 | 3720 | 9913 |
| MSTRG. 4594. 10 | coding    | 0. 162      | 0    | 2025 | 2687 |
| MSTRG. 4594. 11 | noncoding | -0. 0294912 | 333  | 732  | 2205 |
| MSTRG. 4585. 3  | coding    | 0. 098      | 168  | 573  | 1971 |
| MSTRG. 4585. 4  | noncoding | -0. 0610304 | 216  | 372  | 526  |
| MSTRG. 4585. 5  | coding    | 0. 096      | 966  | 1890 | 4827 |
| MSTRG. 4583. 1  | noncoding | -0. 0700416 | 0    | 288  | 571  |
| MSTRG. 4588. 1  | noncoding | -0. 0004096 | 462  | 606  | 1024 |
| MSTRG. 4600. 1  | noncoding | -0. 0299008 | 9408 | 9621 | 9778 |
| MSTRG. 4600. 2  | noncoding | -0. 0008192 | 1068 | 1215 | 2909 |

|               |           |            |       |       |       |
|---------------|-----------|------------|-------|-------|-------|
| MSTRG.4600.3  | noncoding | -0.0913408 | 2949  | 3483  | 3639  |
| MSTRG.4601.3  | coding    | 0.22       | 420   | 2562  | 3312  |
| MSTRG.4601.4  | coding    | 0.216      | 531   | 2706  | 3455  |
| MSTRG.4602.1  | coding    | 0.056      | 438   | 723   | 4597  |
| MSTRG.4603.1  | noncoding | -0.0090112 | 792   | 855   | 1334  |
| MSTRG.4601.8  | coding    | 0.161      | 1167  | 1848  | 2596  |
| MSTRG.4601.9  | coding    | 0.135      | 345   | 996   | 1744  |
| MSTRG.4604.1  | coding    | 0.537      | 4767  | 5910  | 6088  |
| MSTRG.4604.3  | coding    | 0.537      | 366   | 1509  | 1687  |
| MSTRG.4605.7  | coding    | 0.363      | 93    | 1197  | 1428  |
| MSTRG.4605.8  | coding    | 0.355      | 2967  | 4089  | 4319  |
| MSTRG.4605.4  | coding    | 0.35       | 306   | 1461  | 1691  |
| MSTRG.4605.6  | coding    | 0.35       | 798   | 1953  | 2183  |
| MSTRG.4605.9  | noncoding | -0.1568768 | 279   | 1146  | 1302  |
| MSTRG.4605.10 | noncoding | -0.032768  | 1653  | 1767  | 4583  |
| MSTRG.4608.3  | noncoding | -0.147456  | 141   | 198   | 353   |
| MSTRG.4608.6  | coding    | 0.162      | 72    | 1233  | 2166  |
| MSTRG.4609.2  | coding    | 0.233      | 669   | 1395  | 3855  |
| MSTRG.4609.1  | coding    | 0.232      | 3720  | 4449  | 6909  |
| MSTRG.4611.1  | noncoding | -0.0004096 | 0     | 0     | 229   |
| MSTRG.4615.2  | coding    | 0.107      | 45    | 225   | 458   |
| MSTRG.4616.2  | coding    | 0.077      | 4053  | 4995  | 6152  |
| MSTRG.4617.1  | noncoding | -0.06144   | 5664  | 5787  | 16053 |
| MSTRG.4618.1  | coding    | 0.074      | 3042  | 3234  | 3389  |
| MSTRG.4616.3  | noncoding | -0.0360448 | 1497  | 1920  | 2085  |
| MSTRG.4627.9  | coding    | 0.236      | 417   | 1794  | 3008  |
| MSTRG.4627.10 | coding    | 0.241      | 3     | 1443  | 2657  |
| MSTRG.4627.7  | coding    | 0.24       | 3     | 1446  | 2660  |
| MSTRG.4620.2  | coding    | 0.315      | 0     | 609   | 3127  |
| MSTRG.4632.3  | noncoding | -0.0028672 | 459   | 609   | 3531  |
| MSTRG.4634.9  | coding    | 0.328      | 756   | 2697  | 3107  |
| MSTRG.4634.10 | coding    | 0.299      | 3     | 1569  | 1724  |
| MSTRG.4634.13 | coding    | 0.322      | 0     | 1416  | 1824  |
| MSTRG.4706.9  | coding    | 0.337      | 621   | 12858 | 13984 |
| MSTRG.4706.6  | coding    | 0.337      | 0     | 16314 | 17442 |
| MSTRG.4706.4  | coding    | 0.331      | 0     | 16257 | 17385 |
| MSTRG.4706.27 | coding    | 0.336      | 1200  | 10431 | 11242 |
| MSTRG.4706.18 | coding    | 0.338      | 2445  | 14589 | 15399 |
| MSTRG.4706.25 | coding    | 0.27       | 252   | 19977 | 20787 |
| MSTRG.4706.19 | coding    | 0.278      | 0     | 22353 | 23164 |
| MSTRG.4706.12 | coding    | 0.331      | 13260 | 29991 | 30801 |
| MSTRG.4706.14 | coding    | 0.33       | 27600 | 43602 | 44413 |
| MSTRG.4706.24 | coding    | 0.331      | 1725  | 17898 | 18709 |
| MSTRG.4706.16 | coding    | 0.272      | 267   | 22578 | 23388 |
| MSTRG.4706.15 | coding    | 0.273      | 87    | 22461 | 23272 |
| MSTRG.4706.30 | noncoding | -0.0937984 | 0     | 366   | 13445 |
| MSTRG.4706.31 | noncoding | -0.0753664 | 1152  | 1503  | 1658  |
| MSTRG.4706.32 | noncoding | -0.086016  | 6093  | 6399  | 6555  |
| MSTRG.4706.33 | noncoding | -0.0933888 | 36123 | 37311 | 50619 |
| MSTRG.4648.1  | noncoding | -0.0606208 | 171   | 552   | 1878  |
| MSTRG.4649.1  | noncoding | -0.0299008 | 144   | 414   | 1117  |
| MSTRG.4649.2  | noncoding | -0.0299008 | 144   | 414   | 1026  |
| MSTRG.4651.1  | coding    | 0.349      | 0     | 963   | 1673  |
| MSTRG.4660.3  | coding    | 0.17       | 585   | 2898  | 3118  |

|               |           |            |      |      |      |
|---------------|-----------|------------|------|------|------|
| MSTRG.4654.1  | noncoding | -0.124928  | 132  | 1131 | 2845 |
| MSTRG.4654.2  | noncoding | -0.1175552 | 132  | 1272 | 2986 |
| MSTRG.4666.1  | coding    | 0.521      | 0    | 708  | 2699 |
| MSTRG.4673.2  | coding    | 0.295      | 849  | 1860 | 2171 |
| MSTRG.4673.3  | coding    | 0.305      | 189  | 1281 | 1590 |
| MSTRG.4675.2  | coding    | 0.457      | 0    | 1653 | 3169 |
| MSTRG.4679.3  | coding    | 0.279      | 0    | 2136 | 2291 |
| MSTRG.4679.2  | coding    | 0.272      | 378  | 2154 | 2309 |
| MSTRG.4679.5  | coding    | 0.275      | 0    | 1671 | 1825 |
| MSTRG.4680.6  | coding    | 0.197      | 258  | 2883 | 4299 |
| MSTRG.4680.7  | noncoding | -0.0319488 | 9045 | 9201 | 9427 |
| MSTRG.4680.8  | noncoding | -0.0131072 | 1809 | 1944 | 3350 |
| MSTRG.4677.1  | coding    | 0.177      | 510  | 972  | 1722 |
| MSTRG.4677.4  | coding    | 0.178      | 639  | 1095 | 1843 |
| MSTRG.4682.1  | coding    | 0.478      | 0    | 1176 | 1778 |
| MSTRG.4682.2  | coding    | 0.344      | 0    | 705  | 1206 |
| MSTRG.4687.1  | coding    | 0.434      | 579  | 2136 | 2343 |
| MSTRG.4687.5  | coding    | 0.502      | 591  | 1875 | 2080 |
| MSTRG.4687.4  | coding    | 0.434      | 258  | 1815 | 2019 |
| MSTRG.4689.1  | coding    | 0.372      | 78   | 2616 | 8850 |
| MSTRG.4689.2  | coding    | 0.387      | 0    | 2700 | 8186 |
| MSTRG.4691.1  | noncoding | -0.1867776 | 0    | 117  | 432  |
| MSTRG.4692.2  | coding    | 0.498      | 27   | 2286 | 3369 |
| MSTRG.4698.1  | noncoding | -0.0004096 | 0    | 0    | 1774 |
| MSTRG.4700.1  | noncoding | -0.0577536 | 1917 | 2145 | 6070 |
| MSTRG.4701.1  | noncoding | -0.053248  | 2664 | 2730 | 4573 |
| MSTRG.4703.2  | coding    | 0.145      | 147  | 417  | 5559 |
| MSTRG.4703.1  | coding    | 0.145      | 183  | 453  | 3961 |
| MSTRG.4703.3  | noncoding | -0.0385024 | 69   | 252  | 2030 |
| MSTRG.4704.1  | noncoding | -0.0024576 | 504  | 657  | 1738 |
| MSTRG.4703.4  | coding    | 0.145      | 147  | 417  | 5349 |
| MSTRG.4718.3  | noncoding | -0.0045056 | 327  | 468  | 1415 |
| MSTRG.4718.6  | noncoding | -0.024576  | 2280 | 2442 | 5826 |
| MSTRG.4718.8  | noncoding | -0.0016384 | 351  | 498  | 2822 |
| MSTRG.4705.2  | noncoding | -0.0589824 | 294  | 912  | 1279 |
| MSTRG.4709.2  | noncoding | -0.0495616 | 516  | 873  | 1028 |
| MSTRG.4709.1  | noncoding | -0.0495616 | 288  | 645  | 799  |
| MSTRG.4711.4  | coding    | 0.296      | 63   | 3183 | 3339 |
| MSTRG.4711.5  | coding    | 0.297      | 63   | 3156 | 3312 |
| MSTRG.4711.6  | coding    | 0.298      | 0    | 3171 | 3328 |
| MSTRG.4710.1  | coding    | 0.332      | 0    | 957  | 2186 |
| MSTRG.4725.1  | coding    | 0.248      | 351  | 4203 | 5869 |
| MSTRG.4725.2  | coding    | 0.248      | 267  | 4119 | 7017 |
| MSTRG.4725.12 | noncoding | -0.14336   | 300  | 309  | 647  |
| MSTRG.4725.10 | coding    | 0.248      | 129  | 3963 | 5628 |
| MSTRG.4725.11 | coding    | 0.246      | 1818 | 5661 | 7325 |
| MSTRG.4725.9  | coding    | 0.246      | 129  | 3972 | 6870 |
| MSTRG.4725.13 | coding    | 0.247      | 1650 | 5481 | 7147 |
| MSTRG.4725.16 | coding    | 0.264      | 1023 | 4155 | 7054 |
| MSTRG.4725.17 | coding    | 0.267      | 102  | 3279 | 4943 |
| MSTRG.4725.18 | coding    | 0.262      | 189  | 3321 | 4985 |
| MSTRG.4725.19 | coding    | 0.264      | 96   | 3264 | 6163 |
| MSTRG.4725.20 | coding    | 0.262      | 204  | 3327 | 6226 |
| MSTRG.4725.21 | coding    | 0.268      | 183  | 2685 | 6053 |

|               |           |            |      |      |       |
|---------------|-----------|------------|------|------|-------|
| MSTRG.4725.22 | coding    | 0.263      | 162  | 3297 | 4961  |
| MSTRG.4722.3  | coding    | 0.471      | 0    | 255  | 4744  |
| MSTRG.4729.1  | coding    | 0.124      | 180  | 555  | 854   |
| MSTRG.4734.4  | coding    | 0.374      | 162  | 2703 | 2962  |
| MSTRG.4734.5  | coding    | 0.51       | 63   | 2052 | 3295  |
| MSTRG.4735.1  | noncoding | -0.069632  | 438  | 669  | 825   |
| MSTRG.4735.2  | coding    | 0.437      | 465  | 1308 | 2390  |
| MSTRG.4730.1  | coding    | 0.257      | 12   | 393  | 596   |
| MSTRG.4731.1  | noncoding | -0.049152  | 408  | 513  | 772   |
| MSTRG.4738.1  | noncoding | -0.0233472 | 408  | 414  | 569   |
| MSTRG.4741.2  | noncoding | -0.028672  | 1698 | 2082 | 7133  |
| MSTRG.4744.1  | noncoding | -0.022528  | 1389 | 1677 | 3928  |
| MSTRG.4746.1  | noncoding | -0.0110592 | 159  | 351  | 799   |
| MSTRG.4747.3  | coding    | 0.509      | 0    | 3711 | 11286 |
| MSTRG.4750.1  | noncoding | -0.038912  | 135  | 222  | 377   |
| MSTRG.4751.1  | noncoding | -0.004096  | 324  | 390  | 668   |
| MSTRG.4754.1  | coding    | 0.263      | 6    | 2550 | 2877  |
| MSTRG.4754.4  | coding    | 0.264      | 51   | 2604 | 2759  |
| MSTRG.4754.5  | coding    | 0.322      | 0    | 1185 | 1659  |
| MSTRG.4754.6  | coding    | 0.305      | 1233 | 2187 | 2990  |
| MSTRG.4754.7  | coding    | 0.302      | 810  | 1758 | 1977  |
| MSTRG.4752.1  | coding    | 0.501      | 0    | 1407 | 1788  |
| MSTRG.4757.1  | noncoding | -0.065536  | 5640 | 5835 | 7550  |
| MSTRG.4758.2  | coding    | 0.235      | 183  | 543  | 1622  |
| MSTRG.4758.3  | coding    | 0.11       | 51   | 303  | 1382  |
| MSTRG.4761.1  | coding    | 0.413      | 78   | 8298 | 9094  |
| MSTRG.4761.3  | coding    | 0.413      | 75   | 8241 | 8905  |
| MSTRG.4761.5  | coding    | 0.414      | 102  | 8328 | 8755  |
| MSTRG.4762.1  | noncoding | -0.0520192 | 312  | 474  | 765   |
| MSTRG.4763.1  | coding    | 0.462      | 0    | 459  | 10596 |
| MSTRG.4767.2  | noncoding | -0.2613248 | 0    | 237  | 5213  |
| MSTRG.4768.1  | noncoding | -0.0053248 | 420  | 741  | 1469  |
| MSTRG.4767.6  | coding    | 0.325      | 18   | 1299 | 2023  |
| MSTRG.4769.1  | noncoding | -0.0516096 | 30   | 270  | 3712  |
| MSTRG.4767.7  | coding    | 0.3        | 3813 | 6258 | 10996 |
| MSTRG.4772.2  | noncoding | -0.0077824 | 5337 | 5526 | 5680  |
| MSTRG.4766.1  | noncoding | -0.0704512 | 174  | 423  | 711   |
| MSTRG.4766.2  | noncoding | -0.0704512 | 165  | 414  | 816   |
| MSTRG.4766.3  | noncoding | -0.032768  | 54   | 177  | 673   |
| MSTRG.4774.3  | coding    | 0.533      | 0    | 864  | 1330  |
| MSTRG.4774.2  | coding    | 0.531      | 0    | 867  | 1491  |
| MSTRG.4781.2  | coding    | 0.383      | 702  | 4590 | 6759  |
| MSTRG.4785.3  | coding    | 0.538      | 0    | 1869 | 2805  |
| MSTRG.4785.6  | coding    | 0.526      | 0    | 1101 | 5226  |
| MSTRG.4782.1  | coding    | 0.54       | 0    | 1065 | 7010  |
| MSTRG.4782.3  | coding    | 0.549      | 0    | 1035 | 6612  |
| MSTRG.4787.1  | coding    | 0.49       | 0    | 3750 | 8756  |
| MSTRG.4787.2  | coding    | 0.474      | 57   | 2145 | 6636  |
| MSTRG.4787.3  | coding    | 0.487      | 0    | 3729 | 4956  |
| MSTRG.4788.1  | noncoding | -0.0684032 | 669  | 1296 | 1647  |
| MSTRG.4789.1  | noncoding | -0.0258048 | 246  | 735  | 991   |
| MSTRG.4796.1  | coding    | 0.295      | 1104 | 2541 | 4545  |
| MSTRG.4800.2  | coding    | 0.714      | 0    | 1356 | 2094  |
| MSTRG.4811.1  | noncoding | -0.0540672 | 1716 | 2541 | 2696  |



|               |           |            |      |       |       |
|---------------|-----------|------------|------|-------|-------|
| MSTRG.4811.3  | noncoding | -0.0544768 | 1488 | 2307  | 2461  |
| MSTRG.4813.1  | coding    | 0.616      | 180  | 5316  | 7790  |
| MSTRG.4814.1  | noncoding | -0.0376832 | 312  | 7005  | 7159  |
| MSTRG.4815.1  | noncoding | -0.022528  | 174  | 360   | 514   |
| MSTRG.4826.4  | coding    | 0.308      | 537  | 1038  | 1552  |
| MSTRG.4826.5  | coding    | 0.252      | 273  | 1164  | 1679  |
| MSTRG.4826.2  | coding    | 0.251      | 1269 | 1620  | 2136  |
| MSTRG.4826.3  | coding    | 0.426      | 0    | 4335  | 5877  |
| MSTRG.4826.10 | coding    | 0.427      | 0    | 4431  | 4950  |
| MSTRG.4816.1  | noncoding | -0.0720896 | 132  | 486   | 1268  |
| MSTRG.4818.1  | coding    | 0.446      | 123  | 1116  | 2993  |
| MSTRG.4818.2  | coding    | 0.446      | 828  | 1821  | 3696  |
| MSTRG.4818.4  | coding    | 0.446      | 453  | 1446  | 3321  |
| MSTRG.4819.1  | noncoding | -0.0405504 | 0    | 156   | 434   |
| MSTRG.4830.2  | coding    | 0.345      | 0    | 1881  | 2244  |
| MSTRG.4831.4  | coding    | 0.585      | 132  | 1581  | 1735  |
| MSTRG.4831.5  | coding    | 0.586      | 66   | 1518  | 1671  |
| MSTRG.4836.1  | coding    | 0.482      | 60   | 1740  | 2638  |
| MSTRG.4836.2  | coding    | 0.498      | 0    | 1638  | 2535  |
| MSTRG.4843.1  | noncoding | -0.188416  | 87   | 132   | 286   |
| MSTRG.4844.1  | noncoding | -0.0770048 | 0    | 78    | 232   |
| MSTRG.4848.1  | noncoding | -0.06144   | 276  | 336   | 703   |
| MSTRG.4849.1  | coding    | 0.33       | 0    | 798   | 1968  |
| MSTRG.4860.1  | noncoding | -0.047104  | 1488 | 1644  | 1799  |
| MSTRG.4861.1  | coding    | 0.265      | 138  | 1164  | 1499  |
| MSTRG.4861.2  | coding    | 0.248      | 138  | 3801  | 5086  |
| MSTRG.4870.1  | noncoding | -0.0720896 | 18   | 432   | 589   |
| MSTRG.4876.1  | coding    | 0.119      | 0    | 681   | 1728  |
| MSTRG.4877.1  | noncoding | -0.045056  | 1686 | 1809  | 2621  |
| MSTRG.4882.1  | noncoding | -0.0540672 | 0    | 342   | 1272  |
| MSTRG.4882.2  | noncoding | -0.0159744 | 939  | 1119  | 1288  |
| MSTRG.4873.1  | noncoding | -0.0172032 | 657  | 762   | 917   |
| MSTRG.4886.1  | coding    | 0.266      | 207  | 1056  | 2961  |
| MSTRG.4887.1  | coding    | 0.324      | 0    | 3279  | 4175  |
| MSTRG.4887.2  | coding    | 0.447      | 0    | 990   | 2445  |
| MSTRG.4895.2  | coding    | 0.103      | 66   | 711   | 3962  |
| MSTRG.4903.1  | noncoding | -0.0028672 | 258  | 318   | 662   |
| MSTRG.4903.2  | coding    | 0.061      | 210  | 630   | 2669  |
| MSTRG.4921.2  | coding    | 0.132      | 0    | 11448 | 12812 |
| MSTRG.4921.3  | coding    | 0.133      | 0    | 11463 | 11889 |
| MSTRG.4922.2  | coding    | 0.131      | 0    | 1203  | 1419  |
| MSTRG.4924.1  | noncoding | -0.0131072 | 1152 | 1158  | 1464  |
| MSTRG.4925.1  | noncoding | -0.335872  | 612  | 663   | 818   |
| MSTRG.4928.3  | coding    | 0.094      | 366  | 3216  | 5461  |
| MSTRG.4928.4  | coding    | 0.094      | 276  | 3126  | 3741  |
| MSTRG.4929.1  | noncoding | -0.0458752 | 198  | 333   | 4115  |
| MSTRG.4928.6  | noncoding | -0.032768  | 243  | 351   | 505   |
| MSTRG.4930.1  | noncoding | -0.024576  | 1614 | 1704  | 5370  |
| MSTRG.4928.7  | coding    | 0.135      | 432  | 1956  | 4539  |
| MSTRG.4912.2  | coding    | 0.097      | 198  | 492   | 1343  |
| MSTRG.4913.1  | coding    | 0.116      | 810  | 1044  | 3173  |
| MSTRG.4913.3  | coding    | 0.365      | 0    | 360   | 5062  |
| MSTRG.4913.4  | coding    | 0.152      | 858  | 1110  | 5603  |
| MSTRG.4920.1  | noncoding | -0.045056  | 27   | 144   | 466   |

|               |           |            |      |      |       |
|---------------|-----------|------------|------|------|-------|
| MSTRG.4942.1  | noncoding | -0.0131072 | 195  | 204  | 451   |
| MSTRG.4950.1  | noncoding | -0.069632  | 537  | 651  | 1196  |
| MSTRG.4951.2  | noncoding | -0.02048   | 1137 | 1260 | 3316  |
| MSTRG.4953.1  | noncoding | -0.0917504 | 0    | 891  | 1402  |
| MSTRG.4961.1  | coding    | 0.202      | 468  | 4404 | 10354 |
| MSTRG.4961.7  | coding    | 0.264      | 0    | 1869 | 7744  |
| MSTRG.4961.4  | coding    | 0.202      | 213  | 4149 | 10120 |
| MSTRG.4961.5  | coding    | 0.202      | 213  | 4149 | 10100 |
| MSTRG.4961.6  | coding    | 0.215      | 0    | 2484 | 8455  |
| MSTRG.4961.10 | coding    | 0.205      | 507  | 4389 | 10337 |
| MSTRG.4961.8  | coding    | 0.202      | 507  | 4443 | 10393 |
| MSTRG.4961.9  | coding    | 0.202      | 507  | 4443 | 10391 |
| MSTRG.4961.12 | coding    | 0.177      | 450  | 1773 | 2572  |
| MSTRG.4961.11 | coding    | 0.231      | 450  | 3717 | 9559  |
| MSTRG.4961.13 | coding    | 0.202      | 417  | 4353 | 10323 |
| MSTRG.4961.15 | coding    | 0.202      | 390  | 4326 | 10186 |
| MSTRG.4961.14 | coding    | 0.202      | 390  | 4326 | 10298 |
| MSTRG.4962.1  | noncoding | -0.131072  | 1239 | 1278 | 2006  |
| MSTRG.4963.1  | noncoding | -0.786432  | 564  | 702  | 2256  |
| MSTRG.4964.1  | noncoding | -0.077824  | 6069 | 6141 | 8243  |
| MSTRG.4965.1  | noncoding | -0.004096  | 2550 | 2640 | 9619  |
| MSTRG.4965.2  | noncoding | -0.0004096 | 3444 | 3588 | 4819  |
| MSTRG.4965.3  | noncoding | -0.0016384 | 27   | 228  | 3053  |
| MSTRG.4966.1  | noncoding | -0.126976  | 0    | 69   | 225   |
| MSTRG.4967.1  | noncoding | -0.0811008 | 357  | 396  | 1793  |
| MSTRG.4961.17 | coding    | 0.122      | 2781 | 3096 | 3919  |
| MSTRG.4955.1  | coding    | 0.049      | 675  | 831  | 1276  |
| MSTRG.4956.1  | noncoding | -0.073728  | 48   | 114  | 280   |
| MSTRG.4959.3  | coding    | 0.214      | 312  | 2100 | 3051  |
| MSTRG.4960.1  | noncoding | -0.004096  | 189  | 216  | 540   |
| MSTRG.4975.2  | noncoding | -0.04096   | 513  | 627  | 958   |
| MSTRG.4980.10 | coding    | 0.138      | 78   | 1818 | 2051  |
| MSTRG.4980.4  | coding    | 0.138      | 951  | 2556 | 2788  |
| MSTRG.4980.9  | coding    | 0.148      | 66   | 1701 | 1935  |
| MSTRG.4980.8  | coding    | 0.139      | 399  | 2043 | 2277  |
| MSTRG.4980.5  | coding    | 0.139      | 279  | 1893 | 2127  |
| MSTRG.4980.2  | coding    | 0.139      | 429  | 2073 | 2306  |
| MSTRG.4981.2  | noncoding | -0.1523712 | 0    | 252  | 5990  |
| MSTRG.4985.6  | coding    | 0.108      | 3024 | 3720 | 4422  |
| MSTRG.4985.8  | coding    | 0.095      | 237  | 927  | 1630  |
| MSTRG.4990.3  | noncoding | -0.0454656 | 24   | 195  | 16036 |
| MSTRG.4990.4  | noncoding | -0.0487424 | 0    | 156  | 1043  |
| MSTRG.4991.1  | noncoding | -0.0016384 | 1179 | 1338 | 7490  |
| MSTRG.4998.3  | coding    | 0.177      | 0    | 1245 | 3796  |
| MSTRG.4998.4  | coding    | 0.182      | 3189 | 4200 | 6751  |
| MSTRG.4998.5  | coding    | 0.18       | 3189 | 4197 | 6748  |
| MSTRG.4998.6  | coding    | 0.159      | 4218 | 4683 | 5448  |
| MSTRG.4998.7  | coding    | 0.103      | 237  | 426  | 793   |
| MSTRG.4988.6  | coding    | 0.188      | 108  | 1386 | 1661  |
| MSTRG.5003.1  | noncoding | -0.0118784 | 330  | 525  | 680   |
| MSTRG.5020.1  | noncoding | -0.0028672 | 156  | 231  | 495   |
| MSTRG.5021.2  | noncoding | -0.1605632 | 0    | 93   | 6109  |
| MSTRG.5046.1  | noncoding | -0.03072   | 366  | 435  | 637   |
| MSTRG.5052.1  | noncoding | -0.0118784 | 1551 | 1602 | 2744  |

|                 |           |             |       |       |       |
|-----------------|-----------|-------------|-------|-------|-------|
| MSTRG. 5077. 2  | coding    | 0. 153      | 324   | 1704  | 2276  |
| MSTRG. 5077. 3  | coding    | 0. 153      | 258   | 1638  | 2210  |
| MSTRG. 5078. 1  | noncoding | -0. 1024    | 114   | 129   | 448   |
| MSTRG. 5106. 1  | noncoding | -0. 057344  | 99    | 102   | 410   |
| MSTRG. 5095. 2  | noncoding | -0. 008192  | 579   | 717   | 931   |
| MSTRG. 5137. 1  | coding    | 0. 103      | 2637  | 3621  | 11272 |
| MSTRG. 5138. 1  | noncoding | -0. 0004096 | 0     | 0     | 569   |
| MSTRG. 5137. 3  | noncoding | -0. 036864  | 1272  | 1347  | 2845  |
| MSTRG. 5137. 2  | noncoding | -0. 0090112 | 10695 | 10824 | 12163 |
| MSTRG. 5137. 4  | coding    | 0. 135      | 531   | 2919  | 3498  |
| MSTRG. 5137. 5  | noncoding | -0. 0278528 | 1470  | 1563  | 3280  |
| MSTRG. 5137. 6  | noncoding | -0. 049152  | 417   | 459   | 1418  |
| MSTRG. 5140. 2  | noncoding | -0. 053248  | 165   | 252   | 762   |
| MSTRG. 5137. 7  | coding    | 0. 135      | 348   | 2736  | 3315  |
| MSTRG. 5137. 8  | coding    | 0. 135      | 312   | 2700  | 3279  |
| MSTRG. 5137. 10 | noncoding | -0. 0106496 | 945   | 984   | 1259  |
| MSTRG. 5133. 1  | coding    | 0. 084      | 609   | 2499  | 3560  |
| MSTRG. 5133. 3  | coding    | 0. 084      | 840   | 2730  | 6448  |
| MSTRG. 5133. 4  | coding    | 0. 07       | 582   | 864   | 2151  |
| MSTRG. 5134. 1  | coding    | 0. 069      | 465   | 705   | 2177  |
| MSTRG. 5135. 1  | noncoding | -0. 069632  | 273   | 327   | 3290  |
| MSTRG. 5160. 1  | noncoding | -0. 036864  | 537   | 666   | 5343  |
| MSTRG. 5192. 2  | coding    | 0. 162      | 123   | 2019  | 2903  |
| MSTRG. 5192. 1  | coding    | 0. 157      | 123   | 2781  | 2992  |
| MSTRG. 5192. 3  | coding    | 0. 153      | 114   | 597   | 807   |
| MSTRG. 5192. 4  | noncoding | -0. 0094208 | 12    | 159   | 371   |
| MSTRG. 5196. 1  | noncoding | -0. 036864  | 330   | 435   | 590   |
| MSTRG. 5201. 1  | noncoding | -0. 049152  | 0     | 90    | 394   |
| MSTRG. 5209. 1  | noncoding | -0. 0004096 | 0     | 0     | 392   |
| MSTRG. 5236. 1  | coding    | 0. 189      | 1878  | 14502 | 17583 |
| MSTRG. 5236. 3  | coding    | 0. 201      | 4128  | 13854 | 14323 |
| MSTRG. 5237. 1  | noncoding | -0. 0110592 | 1950  | 2109  | 4180  |
| MSTRG. 5236. 6  | coding    | 0. 257      | 5241  | 8937  | 9360  |
| MSTRG. 5238. 5  | coding    | 0. 299      | 171   | 1749  | 1986  |
| MSTRG. 5217. 3  | coding    | 0. 216      | 255   | 2637  | 6802  |
| MSTRG. 5217. 4  | coding    | 0. 222      | 9     | 1767  | 2225  |
| MSTRG. 5218. 1  | noncoding | -0. 147456  | 2769  | 2820  | 3968  |
| MSTRG. 5226. 1  | noncoding | -0. 01024   | 2607  | 2790  | 4973  |
| MSTRG. 5247. 1  | noncoding | -0. 0212992 | 4020  | 4173  | 4346  |
| MSTRG. 5249. 2  | coding    | 0. 123      | 66    | 849   | 4447  |
| MSTRG. 5249. 3  | coding    | 0. 038      | 480   | 1194  | 1590  |
| MSTRG. 5249. 4  | coding    | 0. 068      | 480   | 981   | 4579  |
| MSTRG. 5250. 1  | noncoding | -0. 0524288 | 189   | 465   | 620   |
| MSTRG. 5250. 2  | noncoding | -0. 0749568 | 7539  | 7839  | 7994  |
| MSTRG. 5232. 1  | coding    | 0. 162      | 858   | 2409  | 3443  |
| MSTRG. 5240. 3  | noncoding | -0. 0012288 | 1044  | 1191  | 2764  |
| MSTRG. 5252. 4  | coding    | 0. 185      | 6282  | 6477  | 7232  |
| MSTRG. 5252. 3  | coding    | 0. 185      | 1026  | 1221  | 1975  |
| MSTRG. 5252. 10 | noncoding | -0. 0360448 | 465   | 756   | 2147  |
| MSTRG. 5256. 1  | noncoding | -0. 0004096 | 348   | 501   | 1053  |
| MSTRG. 5257. 1  | coding    | 0. 015      | 381   | 603   | 7802  |
| MSTRG. 5257. 3  | noncoding | -0. 0397312 | 1254  | 1389  | 3649  |
| MSTRG. 5257. 5  | coding    | 0. 021      | 5472  | 5670  | 7925  |
| MSTRG. 5257. 6  | coding    | 0. 021      | 1983  | 2181  | 3927  |

|                |           |             |      |      |       |
|----------------|-----------|-------------|------|------|-------|
| MSTRG. 5258. 1 | noncoding | -0. 0004096 | 114  | 114  | 1786  |
| MSTRG. 5260. 1 | coding    | 0. 111      | 1542 | 1773 | 1940  |
| MSTRG. 5261. 4 | coding    | 0. 082      | 0    | 471  | 2263  |
| MSTRG. 5261. 5 | coding    | 0. 084      | 0    | 459  | 1829  |
| MSTRG. 5265. 1 | noncoding | -0. 0331776 | 1263 | 1335 | 1709  |
| MSTRG. 5254. 1 | coding    | 0. 097      | 0    | 363  | 580   |
| MSTRG. 5285. 2 | coding    | 0. 238      | 216  | 3474 | 3649  |
| MSTRG. 5285. 3 | coding    | 0. 2        | 183  | 3564 | 3739  |
| MSTRG. 5285. 4 | coding    | 0. 241      | 342  | 3114 | 3289  |
| MSTRG. 5286. 1 | noncoding | -0. 126976  | 1659 | 1701 | 1856  |
| MSTRG. 5285. 5 | coding    | 0. 242      | 0    | 2736 | 2911  |
| MSTRG. 5288. 2 | coding    | 0. 308      | 4959 | 5934 | 6939  |
| MSTRG. 5289. 1 | noncoding | -0. 012288  | 3759 | 3870 | 5178  |
| MSTRG. 5293. 1 | coding    | 0. 073      | 879  | 2031 | 2211  |
| MSTRG. 5297. 5 | coding    | 0. 045      | 567  | 816  | 2319  |
| MSTRG. 5298. 1 | noncoding | -0. 018432  | 3939 | 4317 | 6027  |
| MSTRG. 5297. 6 | noncoding | -0. 0004096 | 3960 | 4104 | 5386  |
| MSTRG. 5297. 7 | noncoding | -0. 098304  | 258  | 342  | 499   |
| MSTRG. 5297. 8 | noncoding | -0. 004096  | 351  | 450  | 606   |
| MSTRG. 5299. 3 | noncoding | -0. 045056  | 600  | 648  | 1136  |
| MSTRG. 5300. 1 | noncoding | -0. 233472  | 309  | 342  | 1686  |
| MSTRG. 5301. 1 | coding    | 0. 122      | 42   | 2385 | 3737  |
| MSTRG. 5301. 2 | noncoding | -0. 0212992 | 0    | 144  | 1935  |
| MSTRG. 5301. 4 | coding    | 0. 114      | 48   | 2109 | 3762  |
| MSTRG. 5301. 8 | coding    | 0. 114      | 48   | 2109 | 4569  |
| MSTRG. 5301. 7 | coding    | 0. 114      | 48   | 2109 | 3540  |
| MSTRG. 5301. 3 | coding    | 0. 114      | 48   | 2109 | 3648  |
| MSTRG. 5301. 6 | coding    | 0. 114      | 48   | 2109 | 3696  |
| MSTRG. 5301. 5 | coding    | 0. 114      | 48   | 2109 | 4054  |
| MSTRG. 5305. 1 | noncoding | -0. 0106496 | 8799 | 8952 | 18955 |
| MSTRG. 5305. 2 | noncoding | -0. 086016  | 1326 | 1359 | 2600  |
| MSTRG. 5306. 1 | noncoding | -0. 0004096 | 1827 | 2052 | 2876  |
| MSTRG. 5307. 1 | noncoding | -0. 004096  | 597  | 669  | 1464  |
| MSTRG. 5271. 1 | noncoding | -0. 0004096 | 0    | 0    | 232   |
| MSTRG. 5275. 1 | noncoding | -0. 1138688 | 1071 | 1554 | 2697  |
| MSTRG. 5275. 2 | noncoding | -0. 1138688 | 1119 | 1602 | 2697  |
| MSTRG. 5276. 2 | coding    | 0. 114      | 444  | 2460 | 4794  |
| MSTRG. 5283. 2 | coding    | 0. 12       | 0    | 1797 | 7622  |
| MSTRG. 5283. 3 | noncoding | -0. 0688128 | 843  | 1065 | 1245  |
| MSTRG. 5284. 1 | noncoding | -0. 008192  | 483  | 624  | 2514  |
| MSTRG. 5310. 2 | coding    | 0. 091      | 1695 | 2784 | 3703  |
| MSTRG. 5310. 3 | coding    | 0. 097      | 858  | 1725 | 2776  |
| MSTRG. 5312. 1 | noncoding | -0. 0495616 | 168  | 387  | 1500  |
| MSTRG. 5317. 1 | noncoding | -0. 024576  | 3288 | 3423 | 3712  |
| MSTRG. 5324. 1 | coding    | 0. 211      | 0    | 1461 | 2214  |
| MSTRG. 5324. 2 | coding    | 0. 226      | 312  | 3477 | 3815  |
| MSTRG. 5324. 3 | coding    | 0. 242      | 246  | 669  | 1255  |
| MSTRG. 5331. 1 | coding    | 0. 062      | 4827 | 5058 | 6251  |
| MSTRG. 5358. 2 | noncoding | -0. 0024576 | 1944 | 1965 | 2462  |
| MSTRG. 5359. 2 | coding    | 0. 414      | 219  | 666  | 1760  |
| MSTRG. 5359. 3 | coding    | 0. 414      | 219  | 666  | 2634  |
| MSTRG. 5363. 2 | coding    | 0. 169      | 246  | 1131 | 6094  |
| MSTRG. 5363. 4 | coding    | 0. 169      | 210  | 1095 | 6065  |
| MSTRG. 5363. 5 | coding    | 0. 169      | 45   | 930  | 16144 |

|                |           |             |       |       |       |
|----------------|-----------|-------------|-------|-------|-------|
| MSTRG. 5365. 2 | coding    | 0. 031      | 87    | 1305  | 3074  |
| MSTRG. 5354. 2 | coding    | 0. 104      | 165   | 9891  | 10254 |
| MSTRG. 5354. 3 | coding    | 0. 12       | 156   | 1185  | 1868  |
| MSTRG. 5370. 2 | noncoding | -0. 057344  | 555   | 645   | 1541  |
| MSTRG. 5382. 1 | noncoding | -0. 0249856 | 633   | 1143  | 1347  |
| MSTRG. 5384. 1 | noncoding | -0. 2121728 | 4068  | 4104  | 4441  |
| MSTRG. 5383. 7 | coding    | 0. 035      | 2400  | 2829  | 4084  |
| MSTRG. 5385. 2 | noncoding | -0. 002048  | 420   | 711   | 5402  |
| MSTRG. 5386. 1 | coding    | 0. 187      | 66    | 2136  | 7133  |
| MSTRG. 5386. 3 | coding    | 0. 174      | 561   | 2307  | 5435  |
| MSTRG. 5386. 4 | coding    | 0. 186      | 141   | 2130  | 2285  |
| MSTRG. 5386. 5 | coding    | 0. 19       | 180   | 2196  | 2349  |
| MSTRG. 5386. 7 | coding    | 0. 189      | 180   | 2289  | 2442  |
| MSTRG. 5386. 9 | noncoding | -0. 0720896 | 240   | 270   | 652   |
| MSTRG. 5387. 1 | noncoding | -0. 008192  | 90    | 213   | 6983  |
| MSTRG. 5388. 1 | noncoding | -0. 098304  | 11085 | 11160 | 11313 |
| MSTRG. 5389. 1 | noncoding | -0. 04096   | 3537  | 3732  | 6218  |
| MSTRG. 5391. 1 | noncoding | -0. 0098304 | 42    | 252   | 3290  |
| MSTRG. 5377. 3 | coding    | 0. 126      | 285   | 2202  | 5132  |
| MSTRG. 5377. 2 | coding    | 0. 126      | 321   | 2238  | 5168  |
| MSTRG. 5377. 1 | coding    | 0. 126      | 54    | 2574  | 5505  |
| MSTRG. 5392. 1 | coding    | 0. 07       | 195   | 774   | 4538  |
| MSTRG. 5392. 2 | coding    | 0. 066      | 1017  | 1563  | 3404  |
| MSTRG. 5393. 2 | noncoding | -0. 1437696 | 318   | 1470  | 4599  |
| MSTRG. 5401. 3 | noncoding | -0. 1028096 | 0     | 546   | 1064  |
| MSTRG. 5401. 2 | noncoding | -0. 1024    | 0     | 561   | 1317  |
| MSTRG. 5401. 1 | noncoding | -0. 0638976 | 0     | 276   | 604   |
| MSTRG. 5402. 3 | coding    | 0. 058      | 0     | 1860  | 3087  |
| MSTRG. 5402. 4 | coding    | 0. 136      | 3312  | 3627  | 3959  |
| MSTRG. 5403. 1 | noncoding | -0. 1171456 | 30    | 66    | 424   |
| MSTRG. 5404. 2 | coding    | 0. 068      | 0     | 2400  | 4952  |
| MSTRG. 5404. 1 | coding    | 0. 079      | 99    | 2838  | 10759 |
| MSTRG. 5404. 3 | coding    | 0. 063      | 0     | 2358  | 6024  |
| MSTRG. 5405. 1 | noncoding | -0. 0004096 | 387   | 477   | 699   |
| MSTRG. 5404. 4 | coding    | 0. 129      | 0     | 351   | 812   |
| MSTRG. 5408. 4 | coding    | 0. 103      | 423   | 672   | 1052  |
| MSTRG. 5399. 1 | coding    | 0. 07       | 18    | 954   | 2055  |
| MSTRG. 5399. 2 | coding    | 0. 071      | 0     | 930   | 2029  |
| MSTRG. 5412. 1 | noncoding | -0. 0536576 | 1293  | 1536  | 3753  |
| MSTRG. 5413. 2 | coding    | 0. 24       | 0     | 5316  | 5623  |
| MSTRG. 5414. 1 | noncoding | -0. 032768  | 15    | 30    | 218   |
| MSTRG. 5416. 3 | coding    | 0. 065      | 450   | 2292  | 3812  |
| MSTRG. 5417. 1 | coding    | 0. 075      | 87    | 480   | 745   |
| MSTRG. 5419. 7 | coding    | 0. 086      | 99    | 834   | 2465  |
| MSTRG. 5419. 6 | coding    | 0. 057      | 399   | 837   | 7888  |
| MSTRG. 5419. 8 | coding    | 0. 08       | 786   | 1317  | 3049  |
| MSTRG. 5440. 1 | noncoding | -0. 016384  | 213   | 327   | 483   |
| MSTRG. 5445. 2 | coding    | 0. 124      | 0     | 993   | 1467  |
| MSTRG. 5491. 1 | noncoding | -0. 032768  | 315   | 384   | 2099  |
| MSTRG. 5493. 1 | coding    | 0. 143      | 156   | 471   | 735   |
| MSTRG. 5493. 2 | coding    | 0. 084      | 756   | 1443  | 2658  |
| MSTRG. 5470. 2 | coding    | 0. 387      | 0     | 294   | 3495  |
| MSTRG. 5471. 1 | noncoding | -0. 192512  | 1560  | 1590  | 1922  |
| MSTRG. 5478. 3 | coding    | 0. 085      | 186   | 1434  | 1606  |

|                |           |             |      |      |       |
|----------------|-----------|-------------|------|------|-------|
| MSTRG. 5480. 1 | coding    | 0. 084      | 0    | 1221 | 1546  |
| MSTRG. 5514. 1 | coding    | 0. 192      | 228  | 5325 | 6000  |
| MSTRG. 5515. 1 | noncoding | -0. 028672  | 84   | 207  | 362   |
| MSTRG. 5558. 2 | coding    | 0. 066      | 1989 | 2289 | 7634  |
| MSTRG. 5560. 1 | noncoding | -0. 0622592 | 696  | 735  | 2993  |
| MSTRG. 5561. 1 | noncoding | -0. 098304  | 615  | 666  | 1509  |
| MSTRG. 5561. 2 | noncoding | -0. 032768  | 807  | 939  | 1360  |
| MSTRG. 5562. 1 | noncoding | -0. 0004096 | 1500 | 1644 | 6840  |
| MSTRG. 5563. 1 | noncoding | -0. 0200704 | 252  | 333  | 4051  |
| MSTRG. 5564. 1 | noncoding | -0. 0004096 | 0    | 0    | 1691  |
| MSTRG. 5565. 1 | noncoding | -0. 016384  | 390  | 480  | 857   |
| MSTRG. 5558. 3 | noncoding | -0. 0065536 | 33   | 132  | 699   |
| MSTRG. 5532. 1 | noncoding | -0. 0671744 | 0    | 159  | 8488  |
| MSTRG. 5533. 1 | coding    | 0. 084      | 774  | 936  | 1364  |
| MSTRG. 5533. 2 | noncoding | -0. 0053248 | 888  | 933  | 2665  |
| MSTRG. 5539. 1 | noncoding | -0. 0626688 | 0    | 81   | 834   |
| MSTRG. 5540. 1 | noncoding | -0. 0356352 | 1512 | 1644 | 3328  |
| MSTRG. 5538. 4 | noncoding | -0. 0667648 | 507  | 699  | 1946  |
| MSTRG. 5543. 1 | coding    | 0. 079      | 327  | 1596 | 9345  |
| MSTRG. 5543. 4 | coding    | 0. 064      | 288  | 1305 | 2693  |
| MSTRG. 5543. 2 | coding    | 0. 103      | 309  | 1272 | 3801  |
| MSTRG. 5543. 3 | coding    | 0. 068      | 126  | 855  | 3384  |
| MSTRG. 5543. 7 | coding    | 0. 059      | 330  | 1029 | 3560  |
| MSTRG. 5543. 8 | coding    | 0. 06       | 4422 | 5139 | 6256  |
| MSTRG. 5543. 9 | noncoding | -0. 057344  | 1092 | 1383 | 7960  |
| MSTRG. 5549. 1 | noncoding | -0. 0233472 | 27   | 156  | 413   |
| MSTRG. 5550. 2 | coding    | 0. 233      | 0    | 531  | 2442  |
| MSTRG. 5552. 1 | noncoding | -0. 053248  | 525  | 579  | 1037  |
| MSTRG. 5555. 4 | noncoding | -0. 16384   | 0    | 258  | 1848  |
| MSTRG. 5555. 2 | noncoding | -0. 16384   | 0    | 258  | 4540  |
| MSTRG. 5555. 3 | noncoding | -0. 16384   | 0    | 258  | 3435  |
| MSTRG. 5570. 2 | coding    | 0. 127      | 606  | 1542 | 2094  |
| MSTRG. 5570. 4 | coding    | 0. 11       | 126  | 1689 | 2150  |
| MSTRG. 5572. 2 | coding    | 0. 193      | 0    | 492  | 998   |
| MSTRG. 5574. 5 | coding    | 0. 364      | 0    | 1041 | 2471  |
| MSTRG. 5574. 6 | coding    | 0. 322      | 324  | 1563 | 3043  |
| MSTRG. 5574. 7 | coding    | 0. 241      | 0    | 285  | 1848  |
| MSTRG. 5575. 3 | noncoding | -0. 0937984 | 0    | 486  | 4179  |
| MSTRG. 5575. 4 | coding    | 0. 082      | 813  | 1227 | 3647  |
| MSTRG. 5584. 1 | noncoding | -0. 0745472 | 1437 | 1752 | 1956  |
| MSTRG. 5591. 1 | coding    | 0. 3        | 42   | 1890 | 6724  |
| MSTRG. 5591. 2 | coding    | 0. 299      | 42   | 1971 | 6757  |
| MSTRG. 5595. 3 | coding    | 0. 141      | 0    | 1020 | 1306  |
| MSTRG. 5594. 1 | noncoding | -0. 012288  | 168  | 303  | 753   |
| MSTRG. 5605. 2 | noncoding | -0. 1343488 | 657  | 1530 | 1771  |
| MSTRG. 5606. 2 | noncoding | -0. 032768  | 507  | 612  | 865   |
| MSTRG. 5608. 1 | noncoding | -0. 0872448 | 0    | 171  | 796   |
| MSTRG. 5610. 3 | coding    | 0. 174      | 54   | 1695 | 6879  |
| MSTRG. 5615. 1 | noncoding | -0. 0278528 | 1935 | 2031 | 2636  |
| MSTRG. 5618. 3 | coding    | 0. 242      | 0    | 789  | 943   |
| MSTRG. 5612. 1 | coding    | 0. 198      | 909  | 2091 | 2273  |
| MSTRG. 5627. 1 | coding    | 0. 13       | 6204 | 6489 | 73520 |
| MSTRG. 5628. 1 | noncoding | -0. 053248  | 171  | 180  | 334   |
| MSTRG. 5629. 1 | noncoding | -0. 0229376 | 702  | 864  | 1526  |

|                 |           |             |       |       |       |
|-----------------|-----------|-------------|-------|-------|-------|
| MSTRG. 5629. 2  | noncoding | -0. 0335872 | 0     | 132   | 768   |
| MSTRG. 5627. 3  | coding    | 0. 28       | 36    | 675   | 3079  |
| MSTRG. 5627. 4  | noncoding | -0. 0028672 | 7719  | 7860  | 11190 |
| MSTRG. 5627. 5  | coding    | 0. 13       | 11742 | 12027 | 14765 |
| MSTRG. 5627. 6  | noncoding | -0. 004096  | 3753  | 3891  | 14449 |
| MSTRG. 5627. 7  | coding    | 0. 275      | 6672  | 7164  | 9507  |
| MSTRG. 5627. 8  | noncoding | -0. 004096  | 5331  | 5469  | 85626 |
| MSTRG. 5627. 9  | noncoding | -0. 004096  | 5331  | 5469  | 75975 |
| MSTRG. 5627. 10 | noncoding | -0. 0561152 | 10275 | 10497 | 18506 |
| MSTRG. 5627. 11 | noncoding | -0. 0561152 | 10281 | 10503 | 18512 |
| MSTRG. 5627. 12 | noncoding | -0. 0561152 | 10254 | 10476 | 18468 |
| MSTRG. 5627. 13 | coding    | 0. 285      | 6477  | 6843  | 15972 |
| MSTRG. 5627. 14 | noncoding | -0. 0438272 | 27111 | 27459 | 36838 |
| MSTRG. 5631. 1  | noncoding | -0. 012288  | 63    | 156   | 6298  |
| MSTRG. 5632. 1  | noncoding | -0. 0106496 | 6984  | 7134  | 15990 |
| MSTRG. 5633. 1  | noncoding | -0. 075776  | 1929  | 2109  | 31966 |
| MSTRG. 5633. 2  | noncoding | -0. 0139264 | 4017  | 4308  | 7531  |
| MSTRG. 5634. 1  | coding    | 0. 056      | 120   | 354   | 2177  |
| MSTRG. 5632. 2  | noncoding | -0. 0249856 | 4503  | 4797  | 13911 |
| MSTRG. 5634. 2  | noncoding | -0. 0729088 | 0     | 81    | 5592  |
| MSTRG. 5635. 3  | coding    | 0. 098      | 726   | 2856  | 3862  |
| MSTRG. 5636. 1  | noncoding | -0. 04096   | 2787  | 2886  | 6166  |
| MSTRG. 5621. 2  | coding    | 0. 072      | 4734  | 5517  | 6459  |
| MSTRG. 5624. 1  | coding    | 0. 065      | 4689  | 5445  | 50521 |
| MSTRG. 5624. 2  | noncoding | -0. 004096  | 870   | 1035  | 2221  |
| MSTRG. 5638. 1  | noncoding | -0. 0606208 | 129   | 366   | 1710  |
| MSTRG. 5643. 3  | coding    | 0. 062      | 93    | 504   | 1729  |
| MSTRG. 5642. 4  | coding    | 0. 395      | 0     | 774   | 23956 |
| MSTRG. 5642. 5  | noncoding | -0. 0290816 | 8613  | 8769  | 10560 |
| MSTRG. 5661. 1  | noncoding | -0. 067584  | 0     | 207   | 1077  |
| MSTRG. 5668. 3  | noncoding | -0. 01024   | 633   | 783   | 1617  |
| MSTRG. 5669. 3  | coding    | 0. 103      | 0     | 1794  | 4153  |
| MSTRG. 5669. 4  | coding    | 0. 096      | 1560  | 3147  | 3403  |
| MSTRG. 5669. 5  | coding    | 0. 129      | 0     | 1698  | 1956  |
| MSTRG. 5670. 1  | noncoding | -0. 049152  | 540   | 600   | 1085  |
| MSTRG. 5671. 1  | noncoding | -0. 032768  | 3558  | 3642  | 4447  |
| MSTRG. 5672. 1  | noncoding | -0. 0110592 | 87    | 243   | 554   |
| MSTRG. 5667. 1  | noncoding | -0. 16384   | 0     | 21    | 708   |
| MSTRG. 5681. 1  | coding    | 0. 062      | 27    | 2934  | 14479 |
| MSTRG. 5681. 5  | coding    | 0. 087      | 453   | 2427  | 2802  |
| MSTRG. 5681. 10 | coding    | 0. 028      | 444   | 864   | 1236  |
| MSTRG. 5681. 7  | coding    | 0. 121      | 0     | 675   | 2554  |
| MSTRG. 5681. 11 | coding    | 0. 028      | 336   | 753   | 1974  |
| MSTRG. 5722. 15 | noncoding | -0. 0208896 | 75    | 483   | 4345  |
| MSTRG. 5726. 1  | noncoding | -0. 004096  | 1200  | 1242  | 1718  |
| MSTRG. 5726. 2  | noncoding | -0. 065536  | 3054  | 3096  | 5275  |
| MSTRG. 5722. 17 | noncoding | -0. 077824  | 252   | 438   | 2459  |
| MSTRG. 5722. 18 | coding    | 0. 001      | 414   | 519   | 4420  |
| MSTRG. 5727. 1  | coding    | 0. 109      | 3288  | 3513  | 4233  |
| MSTRG. 5728. 1  | noncoding | -0. 024576  | 6648  | 6735  | 7866  |
| MSTRG. 5729. 1  | noncoding | -0. 499712  | 1023  | 1032  | 1601  |
| MSTRG. 5730. 4  | coding    | 0. 026      | 426   | 759   | 1044  |
| MSTRG. 5722. 19 | noncoding | -0. 0520192 | 114   | 414   | 4134  |
| MSTRG. 5722. 20 | coding    | 0. 102      | 3894  | 4086  | 17240 |

|                 |           |             |       |       |       |
|-----------------|-----------|-------------|-------|-------|-------|
| MSTRG. 5722. 21 | coding    | 0. 105      | 3378  | 3672  | 5335  |
| MSTRG. 5734. 1  | noncoding | -0. 098304  | 477   | 546   | 1851  |
| MSTRG. 5722. 22 | noncoding | -0. 0557056 | 717   | 1053  | 4816  |
| MSTRG. 5687. 2  | noncoding | -0. 1794048 | 0     | 93    | 2961  |
| MSTRG. 5690. 2  | coding    | 0. 185      | 0     | 591   | 1083  |
| MSTRG. 5690. 3  | coding    | 0. 171      | 0     | 549   | 1047  |
| MSTRG. 5695. 3  | noncoding | -0. 0413696 | 12156 | 12810 | 12963 |
| MSTRG. 5696. 1  | noncoding | -0. 0282624 | 4626  | 5109  | 6404  |
| MSTRG. 5695. 5  | coding    | 0. 325      | 2412  | 4038  | 6752  |
| MSTRG. 5695. 6  | coding    | 0. 306      | 2763  | 4734  | 7448  |
| MSTRG. 5693. 1  | noncoding | -0. 004096  | 366   | 405   | 963   |
| MSTRG. 5699. 1  | noncoding | -0. 0135168 | 6     | 228   | 505   |
| MSTRG. 5704. 3  | coding    | 0. 417      | 1011  | 2214  | 2521  |
| MSTRG. 5707. 14 | coding    | 0. 418      | 417   | 1266  | 1420  |
| MSTRG. 5707. 17 | coding    | 0. 403      | 1530  | 2796  | 2950  |
| MSTRG. 5707. 15 | coding    | 0. 4        | 546   | 2010  | 2164  |
| MSTRG. 5707. 11 | coding    | 0. 402      | 336   | 1587  | 1740  |
| MSTRG. 5707. 13 | coding    | 0. 402      | 186   | 1437  | 1590  |
| MSTRG. 5707. 16 | coding    | 0. 402      | 273   | 1524  | 1678  |
| MSTRG. 5707. 6  | coding    | 0. 391      | 255   | 1698  | 1852  |
| MSTRG. 5707. 2  | coding    | 0. 391      | 333   | 1776  | 1929  |
| MSTRG. 5707. 5  | coding    | 0. 391      | 240   | 1683  | 1836  |
| MSTRG. 5707. 9  | coding    | 0. 391      | 390   | 1833  | 1986  |
| MSTRG. 5711. 3  | coding    | 0. 27       | 0     | 267   | 1124  |
| MSTRG. 5713. 3  | coding    | 0. 354      | 357   | 3363  | 4168  |
| MSTRG. 5713. 4  | coding    | 0. 356      | 945   | 3915  | 4722  |
| MSTRG. 5713. 6  | coding    | 0. 32       | 5211  | 8550  | 9356  |
| MSTRG. 5713. 5  | coding    | 0. 377      | 63    | 2547  | 4064  |
| MSTRG. 5717. 2  | noncoding | -0. 0401408 | 147   | 1272  | 1563  |
| MSTRG. 5717. 1  | coding    | 0. 452      | 336   | 2463  | 5213  |
| MSTRG. 5717. 3  | noncoding | -0. 04096   | 291   | 906   | 1061  |
| MSTRG. 5717. 4  | coding    | 0. 453      | 351   | 3006  | 4497  |
| MSTRG. 5717. 5  | coding    | 0. 441      | 351   | 2994  | 3255  |
| MSTRG. 5715. 4  | coding    | 0. 459      | 0     | 588   | 3640  |
| MSTRG. 5715. 3  | coding    | 0. 489      | 282   | 822   | 989   |
| MSTRG. 5716. 1  | coding    | 0. 323      | 0     | 615   | 3269  |
| MSTRG. 5740. 3  | coding    | 0. 138      | 0     | 2007  | 2266  |
| MSTRG. 5742. 1  | noncoding | -0. 0004096 | 0     | 0     | 469   |
| MSTRG. 5745. 3  | coding    | 0. 196      | 1488  | 2022  | 3582  |
| MSTRG. 5745. 2  | coding    | 0. 217      | 2010  | 2796  | 4354  |
| MSTRG. 5746. 8  | coding    | 0. 278      | 39    | 384   | 798   |
| MSTRG. 5746. 9  | coding    | 0. 276      | 414   | 783   | 1195  |
| MSTRG. 5747. 1  | coding    | 0. 118      | 1779  | 2286  | 5455  |
| MSTRG. 5746. 10 | coding    | 0. 276      | 1869  | 2238  | 2650  |
| MSTRG. 5782. 1  | noncoding | -0. 047104  | 1350  | 1389  | 2018  |
| MSTRG. 5757. 2  | noncoding | -0. 065536  | 45    | 126   | 771   |
| MSTRG. 5757. 1  | noncoding | -0. 065536  | 45    | 126   | 1036  |
| MSTRG. 5761. 1  | coding    | 0. 31       | 0     | 4866  | 8275  |
| MSTRG. 5761. 2  | coding    | 0. 305      | 189   | 5274  | 8710  |
| MSTRG. 5763. 2  | noncoding | -0. 0233472 | 3636  | 3789  | 4195  |
| MSTRG. 5762. 1  | noncoding | -0. 077824  | 87    | 117   | 416   |
| MSTRG. 5835. 1  | noncoding | -0. 004096  | 165   | 297   | 2548  |
| MSTRG. 5835. 2  | noncoding | -0. 0159744 | 1758  | 2358  | 9557  |
| MSTRG. 5835. 3  | coding    | 0. 114      | 87    | 432   | 3582  |



|                 |           |             |       |       |       |
|-----------------|-----------|-------------|-------|-------|-------|
| MSTRG. 5835. 4  | coding    | 0. 077      | 174   | 642   | 19096 |
| MSTRG. 5835. 5  | noncoding | -0. 0233472 | 11376 | 11505 | 15510 |
| MSTRG. 5835. 6  | coding    | 0. 099      | 99    | 537   | 4542  |
| MSTRG. 5835. 7  | noncoding | -0. 0352256 | 11148 | 11319 | 34385 |
| MSTRG. 5835. 9  | coding    | 0. 027      | 162   | 441   | 1857  |
| MSTRG. 5836. 1  | noncoding | -0. 008192  | 1083  | 1281  | 3063  |
| MSTRG. 5835. 11 | noncoding | -0. 0688128 | 6618  | 6915  | 7172  |
| MSTRG. 5837. 1  | coding    | 0. 05       | 4497  | 4671  | 14643 |
| MSTRG. 5838. 1  | noncoding | -0. 012288  | 1911  | 2019  | 3189  |
| MSTRG. 5835. 13 | noncoding | -0. 0090112 | 612   | 699   | 3935  |
| MSTRG. 5835. 12 | coding    | 0. 073      | 174   | 390   | 7636  |
| MSTRG. 5835. 14 | coding    | 0. 124      | 87    | 273   | 7511  |
| MSTRG. 5835. 15 | coding    | 0. 033      | 162   | 432   | 7723  |
| MSTRG. 5835. 16 | coding    | 0. 068      | 99    | 339   | 3272  |
| MSTRG. 5835. 17 | coding    | 0. 081      | 348   | 570   | 3450  |
| MSTRG. 5835. 18 | coding    | 0. 033      | 162   | 432   | 3347  |
| MSTRG. 5835. 20 | coding    | 0. 071      | 2271  | 2970  | 16486 |
| MSTRG. 5835. 22 | noncoding | -0. 077824  | 4356  | 4428  | 7240  |
| MSTRG. 5835. 23 | coding    | 0. 113      | 4854  | 5199  | 27623 |
| MSTRG. 5835. 25 | noncoding | -0. 0688128 | 23343 | 23640 | 23947 |
| MSTRG. 5835. 26 | coding    | 0. 02       | 633   | 861   | 6035  |
| MSTRG. 5835. 27 | noncoding | -0. 0688128 | 18615 | 18912 | 19207 |
| MSTRG. 5835. 28 | noncoding | -0. 02048   | 2823  | 2952  | 3109  |
| MSTRG. 5835. 29 | coding    | 0. 099      | 1128  | 1350  | 9740  |
| MSTRG. 5835. 30 | coding    | 0. 099      | 1293  | 1515  | 2359  |
| MSTRG. 5840. 1  | coding    | 0. 083      | 159   | 387   | 1854  |
| MSTRG. 5797. 1  | coding    | 0. 225      | 729   | 5823  | 8148  |
| MSTRG. 5797. 6  | coding    | 0. 136      | 1176  | 4050  | 4411  |
| MSTRG. 5797. 4  | coding    | 0. 126      | 2751  | 5805  | 6168  |
| MSTRG. 5797. 3  | coding    | 0. 126      | 693   | 3747  | 4108  |
| MSTRG. 5797. 5  | coding    | 0. 126      | 327   | 3381  | 3742  |
| MSTRG. 5797. 7  | coding    | 0. 126      | 129   | 3183  | 3428  |
| MSTRG. 5798. 1  | coding    | 0. 024      | 6540  | 6681  | 8945  |
| MSTRG. 5802. 3  | noncoding | -0. 118784  | 2016  | 2061  | 3805  |
| MSTRG. 5803. 1  | noncoding | -0. 04096   | 0     | 402   | 1248  |
| MSTRG. 5805. 1  | coding    | 0. 268      | 0     | 348   | 7041  |
| MSTRG. 5799. 1  | noncoding | -0. 0004096 | 144   | 207   | 381   |
| MSTRG. 5815. 1  | noncoding | -0. 0700416 | 0     | 15    | 362   |
| MSTRG. 5832. 1  | noncoding | -0. 0700416 | 0     | 57    | 395   |
| MSTRG. 5834. 1  | coding    | 0. 109      | 156   | 1359  | 2113  |
| MSTRG. 5845. 3  | coding    | 0. 089      | 1971  | 2832  | 3264  |
| MSTRG. 5845. 4  | coding    | 0. 097      | 1461  | 1863  | 3108  |
| MSTRG. 5856. 2  | coding    | 0. 112      | 1542  | 2490  | 2646  |
| MSTRG. 5858. 1  | noncoding | -0. 094208  | 405   | 423   | 820   |
| MSTRG. 5860. 1  | coding    | 0. 04       | 69    | 201   | 1193  |
| MSTRG. 5862. 1  | noncoding | -0. 098304  | 102   | 606   | 5740  |
| MSTRG. 5864. 1  | coding    | 0. 065      | 0     | 1692  | 3274  |
| MSTRG. 5865. 1  | noncoding | -0. 0004096 | 1806  | 2010  | 5128  |
| MSTRG. 5866. 1  | noncoding | -0. 06144   | 1098  | 1188  | 1632  |
| MSTRG. 5867. 1  | noncoding | -0. 0741376 | 0     | 510   | 947   |
| MSTRG. 5872. 5  | coding    | 0. 042      | 510   | 735   | 1922  |
| MSTRG. 5873. 1  | noncoding | -0. 12288   | 3234  | 3243  | 4213  |
| MSTRG. 5874. 2  | noncoding | -0. 008192  | 1107  | 1215  | 1725  |
| MSTRG. 5874. 3  | noncoding | -0. 008192  | 438   | 546   | 1054  |

|                |           |             |      |      |       |
|----------------|-----------|-------------|------|------|-------|
| MSTRG. 5874. 5 | noncoding | -0. 008192  | 1101 | 1209 | 1451  |
| MSTRG. 5874. 4 | noncoding | -0. 008192  | 1143 | 1251 | 1761  |
| MSTRG. 5877. 1 | coding    | 0. 211      | 972  | 2832 | 3070  |
| MSTRG. 5879. 1 | noncoding | -0. 0442368 | 1242 | 1332 | 2903  |
| MSTRG. 5885. 2 | coding    | 0. 187      | 246  | 1683 | 2345  |
| MSTRG. 5886. 1 | noncoding | -0. 0167936 | 60   | 219  | 389   |
| MSTRG. 5890. 2 | coding    | 0. 057      | 435  | 993  | 4046  |
| MSTRG. 5890. 3 | coding    | 0. 033      | 171  | 1230 | 2755  |
| MSTRG. 5891. 1 | coding    | 0. 646      | 9    | 1314 | 3537  |
| MSTRG. 5891. 2 | coding    | 0. 646      | 0    | 1293 | 3316  |
| MSTRG. 5891. 3 | coding    | 0. 645      | 189  | 1464 | 3273  |
| MSTRG. 5896. 2 | coding    | 0. 297      | 0    | 1221 | 12861 |
| MSTRG. 5897. 1 | noncoding | -0. 0651264 | 2565 | 2745 | 11595 |
| MSTRG. 5901. 1 | noncoding | -0. 004096  | 516  | 654  | 2102  |
| MSTRG. 5904. 1 | coding    | 0. 333      | 2037 | 2973 | 4055  |
| MSTRG. 5904. 2 | coding    | 0. 153      | 54   | 1050 | 2038  |
| MSTRG. 5904. 4 | coding    | 0. 329      | 1548 | 2421 | 3504  |
| MSTRG. 5907. 1 | coding    | 0. 578      | 0    | 8358 | 9154  |
| MSTRG. 5908. 1 | noncoding | -0. 0434176 | 162  | 1008 | 1826  |
| MSTRG. 5908. 2 | noncoding | -0. 04096   | 21   | 669  | 1027  |
| MSTRG. 5907. 3 | coding    | 0. 569      | 84   | 6771 | 7435  |
| MSTRG. 5907. 4 | coding    | 0. 568      | 63   | 6831 | 7489  |
| MSTRG. 5909. 2 | coding    | 0. 108      | 1350 | 2580 | 3119  |
| MSTRG. 5909. 3 | coding    | 0. 108      | 1626 | 2856 | 3395  |
| MSTRG. 5909. 4 | coding    | 0. 054      | 159  | 504  | 2392  |
| MSTRG. 5910. 1 | coding    | 0. 347      | 429  | 1356 | 2320  |
| MSTRG. 5915. 1 | coding    | 0. 235      | 345  | 2184 | 5362  |
| MSTRG. 5915. 4 | coding    | 0. 485      | 0    | 333  | 1214  |
| MSTRG. 5915. 3 | coding    | 0. 196      | 0    | 1890 | 5067  |
| MSTRG. 5916. 1 | coding    | 0. 071      | 2124 | 2622 | 5224  |
| MSTRG. 5917. 2 | coding    | 0. 143      | 594  | 849  | 1127  |
| MSTRG. 5918. 1 | noncoding | -0. 0004096 | 0    | 0    | 280   |
| MSTRG. 5919. 1 | coding    | 0. 134      | 4551 | 4800 | 7350  |
| MSTRG. 5920. 1 | coding    | 0. 04       | 6204 | 6621 | 11623 |
| MSTRG. 5924. 1 | noncoding | -0. 057344  | 0    | 21   | 2104  |
| MSTRG. 5924. 6 | coding    | 0. 22       | 0    | 1587 | 6413  |
| MSTRG. 5924. 7 | coding    | 0. 192      | 0    | 1359 | 1731  |
| MSTRG. 5924. 8 | coding    | 0. 176      | 828  | 2022 | 2447  |
| MSTRG. 5921. 1 | noncoding | -0. 02048   | 297  | 420  | 1084  |
| MSTRG. 5922. 3 | coding    | 0. 039      | 1215 | 1365 | 2427  |
| MSTRG. 5922. 4 | noncoding | -0. 0315392 | 5301 | 5487 | 6628  |
| MSTRG. 5923. 1 | noncoding | -0. 065536  | 1911 | 1992 | 9673  |
| MSTRG. 5925. 1 | coding    | 0. 17       | 66   | 1602 | 2215  |
| MSTRG. 5925. 2 | coding    | 0. 17       | 102  | 1638 | 2393  |
| MSTRG. 5925. 4 | coding    | 0. 17       | 66   | 1602 | 3197  |
| MSTRG. 5925. 3 | coding    | 0. 161      | 72   | 1209 | 3067  |
| MSTRG. 5925. 5 | coding    | 0. 17       | 102  | 1638 | 3183  |
| MSTRG. 5927. 1 | coding    | 0. 086      | 2619 | 4293 | 6777  |
| MSTRG. 5927. 2 | coding    | 0. 09       | 3948 | 4539 | 7821  |
| MSTRG. 5932. 1 | coding    | 0. 062      | 45   | 372  | 998   |
| MSTRG. 5934. 1 | coding    | 0. 172      | 1089 | 2232 | 2419  |
| MSTRG. 5934. 3 | coding    | 0. 349      | 693  | 1932 | 2157  |
| MSTRG. 5934. 4 | coding    | 0. 349      | 741  | 1980 | 2205  |
| MSTRG. 5935. 2 | coding    | 0. 175      | 165  | 1086 | 2342  |

|                |           |             |      |      |      |
|----------------|-----------|-------------|------|------|------|
| MSTRG. 5936. 1 | coding    | 0. 213      | 0    | 2532 | 2978 |
| MSTRG. 5939. 1 | noncoding | -0. 0094208 | 9    | 42   | 406  |
| MSTRG. 5940. 1 | noncoding | -0. 049152  | 93   | 171  | 326  |
| MSTRG. 5940. 2 | noncoding | -0. 0077824 | 141  | 708  | 935  |
| MSTRG. 5939. 2 | noncoding | -0. 0024576 | 123  | 132  | 296  |
| MSTRG. 5940. 4 | noncoding | -0. 065536  | 141  | 183  | 338  |
| MSTRG. 5939. 3 | noncoding | -0. 008192  | 219  | 423  | 709  |
| MSTRG. 5939. 4 | noncoding | -0. 0622592 | 0    | 216  | 461  |
| MSTRG. 5940. 5 | noncoding | -0. 0131072 | 63   | 117  | 311  |
| MSTRG. 5942. 1 | noncoding | -0. 0106496 | 15   | 27   | 223  |
| MSTRG. 5944. 1 | noncoding | -0. 0417792 | 360  | 657  | 1044 |
| MSTRG. 5945. 1 | noncoding | -0. 036864  | 78   | 99   | 263  |
| MSTRG. 5946. 1 | noncoding | -0. 036864  | 576  | 687  | 844  |
| MSTRG. 5945. 2 | noncoding | -0. 036864  | 60   | 81   | 247  |
| MSTRG. 5949. 2 | noncoding | -0. 02048   | 351  | 480  | 733  |
| MSTRG. 5966. 1 | noncoding | -0. 012288  | 810  | 897  | 1444 |
| MSTRG. 5965. 5 | coding    | 0. 106      | 327  | 2037 | 8375 |
| MSTRG. 5969. 1 | noncoding | -0. 299008  | 1065 | 1086 | 1458 |
| MSTRG. 5965. 6 | coding    | 0. 087      | 552  | 1110 | 1433 |
| MSTRG. 5965. 7 | noncoding | -0. 016384  | 1032 | 1140 | 1645 |
| MSTRG. 5965. 8 | coding    | 0. 074      | 3666 | 4362 | 6508 |
| MSTRG. 5970. 1 | noncoding | -0. 0004096 | 0    | 0    | 741  |
| MSTRG. 5972. 1 | noncoding | -0. 02048   | 444  | 534  | 3267 |
| MSTRG. 5951. 1 | noncoding | -0. 0208896 | 993  | 1248 | 1613 |
| MSTRG. 5953. 1 | noncoding | -0. 0311296 | 621  | 1080 | 1234 |
| MSTRG. 5955. 2 | coding    | 0. 249      | 69   | 381  | 1200 |
| MSTRG. 5956. 3 | coding    | 0. 376      | 0    | 1128 | 2600 |
| MSTRG. 5956. 2 | coding    | 0. 371      | 0    | 1281 | 6812 |
| MSTRG. 5956. 4 | noncoding | -0. 0110592 | 1860 | 1956 | 2677 |
| MSTRG. 5958. 1 | noncoding | -0. 02048   | 2967 | 3069 | 5275 |
| MSTRG. 5956. 6 | coding    | 0. 303      | 264  | 1398 | 2587 |
| MSTRG. 5956. 7 | coding    | 0. 355      | 246  | 1644 | 2984 |
| MSTRG. 5959. 1 | noncoding | -0. 0258048 | 2964 | 3045 | 6012 |
| MSTRG. 5960. 1 | noncoding | -0. 0036864 | 2781 | 2829 | 3483 |
| MSTRG. 5961. 1 | noncoding | -0. 16384   | 822  | 882  | 4294 |
| MSTRG. 5962. 1 | noncoding | -0. 065536  | 1017 | 1020 | 2202 |
| MSTRG. 5956. 8 | coding    | 0. 404      | 210  | 921  | 1813 |
| MSTRG. 5985. 4 | noncoding | -0. 0249856 | 12   | 783  | 2562 |
| MSTRG. 5985. 7 | coding    | 0. 087      | 27   | 924  | 2673 |
| MSTRG. 5985. 5 | coding    | 0. 055      | 1185 | 2235 | 3406 |
| MSTRG. 5985. 8 | coding    | 0. 107      | 0    | 678  | 3748 |
| MSTRG. 5986. 1 | noncoding | -0. 004096  | 4620 | 4677 | 5464 |
| MSTRG. 5989. 1 | coding    | 0. 146      | 0    | 393  | 1382 |
| MSTRG. 5990. 2 | coding    | 0. 335      | 312  | 807  | 1833 |
| MSTRG. 5989. 4 | coding    | 0. 235      | 114  | 618  | 1496 |
| MSTRG. 5984. 1 | noncoding | -0. 0610304 | 360  | 558  | 2710 |
| MSTRG. 5991. 1 | coding    | 0. 352      | 159  | 1209 | 1480 |
| MSTRG. 5991. 3 | coding    | 0. 117      | 27   | 231  | 522  |
| MSTRG. 5992. 1 | coding    | 0. 286      | 192  | 2043 | 6469 |
| MSTRG. 5994. 1 | noncoding | -0. 012288  | 441  | 564  | 1203 |
| MSTRG. 5995. 1 | noncoding | -0. 0454656 | 384  | 918  | 1073 |
| MSTRG. 5997. 1 | noncoding | -0. 065536  | 48   | 66   | 287  |
| MSTRG. 5999. 1 | coding    | 0. 164      | 33   | 297  | 503  |
| MSTRG. 6004. 5 | coding    | 0. 048      | 270  | 2076 | 2489 |

|                 |           |             |      |      |       |
|-----------------|-----------|-------------|------|------|-------|
| MSTRG. 6004. 4  | coding    | 0. 067      | 294  | 2313 | 2725  |
| MSTRG. 6005. 1  | noncoding | -0. 0090112 | 321  | 435  | 5677  |
| MSTRG. 6006. 1  | noncoding | -0. 0221184 | 3393 | 3414 | 4577  |
| MSTRG. 6004. 7  | coding    | 0. 045      | 273  | 1878 | 2947  |
| MSTRG. 6007. 1  | noncoding | -0. 065536  | 564  | 639  | 1634  |
| MSTRG. 6008. 1  | coding    | 0. 001      | 5247 | 5418 | 6249  |
| MSTRG. 6008. 2  | noncoding | -0. 0507904 | 0    | 36   | 639   |
| MSTRG. 6009. 3  | coding    | 0. 165      | 2607 | 6246 | 6538  |
| MSTRG. 6001. 2  | noncoding | -0. 0479232 | 15   | 258  | 413   |
| MSTRG. 6010. 2  | coding    | 0. 211      | 93   | 324  | 4061  |
| MSTRG. 6020. 4  | coding    | 0. 101      | 156  | 3060 | 3737  |
| MSTRG. 6029. 2  | noncoding | -0. 1650688 | 207  | 804  | 1093  |
| MSTRG. 6029. 3  | coding    | 0. 379      | 99   | 789  | 1052  |
| MSTRG. 6029. 4  | coding    | 0. 109      | 36   | 2709 | 5935  |
| MSTRG. 6030. 1  | noncoding | -0. 0212992 | 0    | 129  | 594   |
| MSTRG. 6033. 2  | coding    | 0. 163      | 0    | 333  | 1130  |
| MSTRG. 6035. 1  | noncoding | -0. 055296  | 0    | 426  | 4197  |
| MSTRG. 6036. 2  | coding    | 0. 137      | 0    | 1392 | 2796  |
| MSTRG. 6036. 3  | coding    | 0. 11       | 201  | 1131 | 2536  |
| MSTRG. 6037. 1  | noncoding | -0. 032768  | 855  | 945  | 5866  |
| MSTRG. 6040. 1  | coding    | 0. 388      | 0    | 3624 | 15070 |
| MSTRG. 6040. 2  | coding    | 0. 379      | 0    | 3702 | 15005 |
| MSTRG. 6040. 3  | coding    | 0. 387      | 0    | 3621 | 14792 |
| MSTRG. 6040. 5  | coding    | 0. 369      | 351  | 2640 | 3077  |
| MSTRG. 6040. 4  | coding    | 0. 389      | 0    | 3543 | 3980  |
| MSTRG. 6040. 6  | coding    | 0. 37       | 522  | 2169 | 2325  |
| MSTRG. 6040. 7  | coding    | 0. 371      | 282  | 2187 | 2343  |
| MSTRG. 6040. 8  | coding    | 0. 369      | 0    | 1947 | 2102  |
| MSTRG. 6040. 9  | coding    | 0. 406      | 0    | 1260 | 1921  |
| MSTRG. 6040. 10 | coding    | 0. 402      | 0    | 1197 | 1536  |
| MSTRG. 6040. 11 | coding    | 0. 407      | 0    | 1218 | 1614  |
| MSTRG. 6042. 1  | coding    | 0. 33       | 315  | 1698 | 1899  |
| MSTRG. 6043. 3  | coding    | 0. 271      | 0    | 1467 | 2827  |
| MSTRG. 6045. 2  | coding    | 0. 066      | 513  | 2328 | 4417  |
| MSTRG. 6050. 1  | coding    | 0. 312      | 609  | 2067 | 4752  |
| MSTRG. 6050. 3  | coding    | 0. 301      | 57   | 1323 | 3263  |
| MSTRG. 6050. 4  | coding    | 0. 312      | 531  | 1989 | 3533  |
| MSTRG. 6050. 7  | coding    | 0. 259      | 51   | 816  | 1320  |
| MSTRG. 6056. 1  | coding    | 0. 353      | 984  | 4029 | 4443  |
| MSTRG. 6058. 1  | noncoding | -0. 0434176 | 2724 | 3756 | 3910  |
| MSTRG. 6058. 2  | noncoding | -0. 0401408 | 3579 | 3945 | 4101  |
| MSTRG. 6060. 3  | noncoding | -0. 1056768 | 0    | 249  | 4233  |
| MSTRG. 6060. 2  | noncoding | -0. 0987136 | 0    | 258  | 4638  |
| MSTRG. 6061. 2  | coding    | 0. 101      | 0    | 2343 | 9546  |
| MSTRG. 6061. 4  | coding    | 0. 055      | 0    | 1935 | 7844  |
| MSTRG. 6061. 5  | noncoding | -0. 0151552 | 951  | 1104 | 4541  |
| MSTRG. 6061. 6  | coding    | 0. 102      | 0    | 2286 | 10573 |
| MSTRG. 6061. 7  | coding    | 0. 104      | 0    | 2223 | 5589  |
| MSTRG. 6061. 10 | coding    | 0. 046      | 0    | 1953 | 2109  |
| MSTRG. 6061. 11 | coding    | 0. 049      | 696  | 1896 | 2051  |
| MSTRG. 6061. 12 | coding    | 0. 106      | 0    | 2046 | 2490  |
| MSTRG. 6061. 9  | coding    | 0. 125      | 0    | 1776 | 2476  |
| MSTRG. 6062. 1  | noncoding | -0. 008192  | 975  | 1116 | 2702  |
| MSTRG. 6063. 1  | noncoding | -0. 036864  | 219  | 303  | 1855  |

|                 |           |             |       |       |       |
|-----------------|-----------|-------------|-------|-------|-------|
| MSTRG. 6055. 2  | coding    | 0. 034      | 315   | 636   | 889   |
| MSTRG. 6055. 3  | coding    | 0. 034      | 141   | 462   | 714   |
| MSTRG. 6065. 2  | coding    | 0. 004      | 450   | 783   | 1249  |
| MSTRG. 6066. 1  | coding    | 0. 306      | 1245  | 3819  | 6257  |
| MSTRG. 6067. 2  | coding    | 0. 013      | 276   | 666   | 1119  |
| MSTRG. 6068. 2  | coding    | 0. 088      | 123   | 741   | 1045  |
| MSTRG. 6073. 1  | coding    | 0. 272      | 0     | 327   | 673   |
| MSTRG. 6074. 1  | noncoding | -0. 0516096 | 138   | 342   | 500   |
| MSTRG. 6075. 1  | coding    | 0. 326      | 330   | 837   | 1004  |
| MSTRG. 6076. 1  | coding    | 0. 454      | 0     | 504   | 797   |
| MSTRG. 6077. 1  | coding    | 0. 292      | 0     | 291   | 446   |
| MSTRG. 6077. 2  | coding    | 0. 457      | 0     | 507   | 746   |
| MSTRG. 6088. 1  | coding    | 0. 267      | 0     | 876   | 3446  |
| MSTRG. 6088. 5  | coding    | 0. 307      | 0     | 573   | 728   |
| MSTRG. 6089. 2  | coding    | 0. 311      | 0     | 1146  | 3653  |
| MSTRG. 6089. 3  | coding    | 0. 301      | 0     | 975   | 4034  |
| MSTRG. 6096. 1  | noncoding | -0. 0004096 | 0     | 0     | 268   |
| MSTRG. 6100. 1  | noncoding | -0. 0352256 | 2883  | 3333  | 7369  |
| MSTRG. 6104. 1  | noncoding | -0. 0356352 | 459   | 849   | 1311  |
| MSTRG. 6105. 1  | noncoding | -0. 0004096 | 339   | 483   | 818   |
| MSTRG. 6112. 1  | coding    | 0. 309      | 129   | 837   | 4678  |
| MSTRG. 6113. 1  | noncoding | -0. 0004096 | 273   | 489   | 852   |
| MSTRG. 6121. 3  | coding    | 0. 289      | 10767 | 12924 | 13239 |
| MSTRG. 6121. 5  | coding    | 0. 291      | 168   | 2247  | 2559  |
| MSTRG. 6121. 7  | coding    | 0. 329      | 10791 | 12117 | 12292 |
| MSTRG. 6121. 9  | coding    | 0. 276      | 2853  | 5109  | 5283  |
| MSTRG. 6121. 10 | coding    | 0. 274      | 3123  | 5283  | 5436  |
| MSTRG. 6119. 1  | coding    | 0. 353      | 297   | 2067  | 3877  |
| MSTRG. 6119. 3  | coding    | 0. 353      | 1323  | 3093  | 3594  |
| MSTRG. 6124. 3  | coding    | 0. 44       | 231   | 1620  | 2815  |
| MSTRG. 6125. 2  | coding    | 0. 443      | 198   | 2010  | 4326  |
| MSTRG. 6125. 3  | coding    | 0. 44       | 0     | 1911  | 4227  |
| MSTRG. 6125. 4  | coding    | 0. 472      | 198   | 1887  | 4203  |
| MSTRG. 6130. 4  | coding    | 0. 411      | 114   | 2145  | 3713  |
| MSTRG. 6127. 1  | noncoding | -0. 0667648 | 0     | 96    | 378   |
| MSTRG. 6133. 1  | noncoding | -0. 0176128 | 42    | 198   | 373   |
| MSTRG. 6133. 2  | noncoding | -0. 02048   | 72    | 156   | 311   |
| MSTRG. 6134. 1  | noncoding | -0. 1060864 | 0     | 324   | 479   |
| MSTRG. 6136. 1  | noncoding | -0. 094208  | 453   | 510   | 663   |
| MSTRG. 6136. 2  | coding    | 0. 514      | 330   | 1227  | 1734  |
| MSTRG. 6139. 6  | coding    | 0. 477      | 201   | 2112  | 3237  |
| MSTRG. 6140. 2  | noncoding | -0. 0446464 | 0     | 210   | 661   |
| MSTRG. 6141. 2  | coding    | 0. 405      | 204   | 1764  | 2646  |
| MSTRG. 6143. 1  | coding    | 0. 259      | 246   | 1005  | 2011  |
| MSTRG. 6145. 3  | coding    | 0. 275      | 423   | 1239  | 1752  |
| MSTRG. 6149. 1  | coding    | 0. 235      | 81    | 810   | 1921  |
| MSTRG. 6154. 3  | coding    | 0. 294      | 0     | 666   | 1028  |
| MSTRG. 6163. 1  | coding    | 0. 293      | 15    | 825   | 1491  |
| MSTRG. 6163. 2  | coding    | 0. 298      | 72    | 879   | 1545  |
| MSTRG. 6163. 4  | coding    | 0. 283      | 429   | 1551  | 2217  |
| MSTRG. 6163. 5  | coding    | 0. 277      | 0     | 1191  | 1856  |
| MSTRG. 6161. 2  | coding    | 0. 26       | 0     | 2223  | 2386  |
| MSTRG. 6161. 3  | coding    | 0. 618      | 879   | 2610  | 3165  |
| MSTRG. 6167. 1  | coding    | 0. 411      | 1029  | 3087  | 3616  |

|                 |           |             |      |       |       |
|-----------------|-----------|-------------|------|-------|-------|
| MSTRG. 6167. 3  | coding    | 0. 411      | 744  | 2802  | 3328  |
| MSTRG. 6169. 2  | coding    | 0. 497      | 0    | 1557  | 1712  |
| MSTRG. 6170. 1  | noncoding | -0. 0147456 | 1707 | 1809  | 2052  |
| MSTRG. 6171. 1  | noncoding | -0. 0466944 | 162  | 519   | 981   |
| MSTRG. 6171. 2  | noncoding | -0. 0495616 | 162  | 549   | 879   |
| MSTRG. 6173. 2  | coding    | 0. 073      | 6084 | 6495  | 6809  |
| MSTRG. 6173. 3  | noncoding | -0. 0507904 | 54   | 234   | 2960  |
| MSTRG. 6174. 7  | coding    | 0. 255      | 0    | 1098  | 1912  |
| MSTRG. 6174. 1  | coding    | 0. 24       | 0    | 1011  | 1824  |
| MSTRG. 6174. 6  | coding    | 0. 222      | 0    | 1005  | 1819  |
| MSTRG. 6174. 9  | noncoding | -0. 0958464 | 0    | 153   | 316   |
| MSTRG. 6174. 10 | noncoding | -0. 008192  | 45   | 165   | 325   |
| MSTRG. 6186. 2  | coding    | 0. 088      | 306  | 828   | 1649  |
| MSTRG. 6190. 2  | coding    | 0. 234      | 3    | 15054 | 16909 |
| MSTRG. 6190. 1  | coding    | 0. 234      | 3    | 15093 | 16949 |
| MSTRG. 6190. 10 | coding    | 0. 247      | 294  | 13764 | 15065 |
| MSTRG. 6190. 11 | coding    | 0. 247      | 615  | 14088 | 15388 |
| MSTRG. 6190. 15 | coding    | 0. 251      | 273  | 13482 | 14784 |
| MSTRG. 6190. 12 | coding    | 0. 247      | 276  | 13746 | 15047 |
| MSTRG. 6190. 5  | coding    | 0. 248      | 285  | 13734 | 15034 |
| MSTRG. 6190. 14 | coding    | 0. 25       | 906  | 14151 | 15452 |
| MSTRG. 6190. 9  | coding    | 0. 236      | 0    | 14811 | 16113 |
| MSTRG. 6190. 6  | coding    | 0. 233      | 6    | 15069 | 16370 |
| MSTRG. 6190. 4  | coding    | 0. 234      | 3    | 15069 | 16371 |
| MSTRG. 6190. 8  | coding    | 0. 234      | 3    | 15063 | 16365 |
| MSTRG. 6190. 17 | coding    | 0. 127      | 309  | 1695  | 3994  |
| MSTRG. 6192. 1  | noncoding | -0. 032768  | 1008 | 1386  | 2744  |
| MSTRG. 6193. 1  | noncoding | -0. 028672  | 726  | 807   | 3128  |
| MSTRG. 6179. 1  | noncoding | -0. 06144   | 675  | 771   | 3253  |
| MSTRG. 6179. 2  | noncoding | -0. 1445888 | 0    | 63    | 738   |
| MSTRG. 6180. 6  | coding    | 0. 116      | 228  | 609   | 4482  |
| MSTRG. 6180. 7  | coding    | 0. 304      | 0    | 348   | 6111  |
| MSTRG. 6180. 5  | coding    | 0. 248      | 0    | 414   | 4354  |
| MSTRG. 6180. 2  | coding    | 0. 38       | 0    | 1269  | 2715  |
| MSTRG. 6180. 4  | coding    | 0. 38       | 0    | 1269  | 2705  |
| MSTRG. 6180. 8  | noncoding | -0. 0520192 | 768  | 1035  | 5823  |
| MSTRG. 6181. 1  | noncoding | -0. 0180224 | 1296 | 2328  | 2674  |
| MSTRG. 6181. 2  | noncoding | -0. 036864  | 570  | 837   | 3632  |
| MSTRG. 6180. 10 | noncoding | -0. 0835584 | 456  | 726   | 976   |
| MSTRG. 6180. 11 | noncoding | -0. 08192   | 513  | 774   | 1024  |
| MSTRG. 6180. 9  | noncoding | -0. 08192   | 570  | 831   | 1081  |
| MSTRG. 6182. 1  | noncoding | -0. 1073152 | 0    | 267   | 1174  |
| MSTRG. 6184. 1  | noncoding | -0. 0475136 | 1239 | 1395  | 2402  |
| MSTRG. 6196. 1  | noncoding | -0. 139264  | 45   | 93    | 246   |
| MSTRG. 6201. 1  | coding    | 0. 368      | 54   | 1578  | 2924  |
| MSTRG. 6204. 2  | coding    | 0. 424      | 525  | 3039  | 3491  |
| MSTRG. 6204. 3  | coding    | 0. 347      | 1002 | 4479  | 4807  |
| MSTRG. 6206. 1  | noncoding | -0. 0167936 | 234  | 414   | 598   |
| MSTRG. 6212. 1  | coding    | 0. 314      | 108  | 4263  | 10373 |
| MSTRG. 6212. 2  | coding    | 0. 316      | 0    | 4122  | 9838  |
| MSTRG. 6212. 3  | noncoding | -0. 176128  | 840  | 927   | 1080  |
| MSTRG. 6212. 8  | coding    | 0. 286      | 486  | 2691  | 4920  |
| MSTRG. 6220. 1  | noncoding | -0. 0360448 | 228  | 297   | 450   |
| MSTRG. 6222. 3  | coding    | 0. 323      | 366  | 1194  | 1349  |

|                |           |             |       |       |       |
|----------------|-----------|-------------|-------|-------|-------|
| MSTRG. 6222. 4 | coding    | 0. 444      | 537   | 1041  | 1194  |
| MSTRG. 6223. 1 | noncoding | -0. 0528384 | 1209  | 1497  | 5618  |
| MSTRG. 6231. 1 | coding    | 0. 445      | 195   | 1764  | 2583  |
| MSTRG. 6232. 2 | coding    | 0. 323      | 0     | 3219  | 4675  |
| MSTRG. 6232. 4 | coding    | 0. 284      | 0     | 3306  | 4763  |
| MSTRG. 6233. 1 | noncoding | -0. 083968  | 477   | 699   | 1972  |
| MSTRG. 6233. 2 | noncoding | -0. 073728  | 1425  | 1647  | 2418  |
| MSTRG. 6235. 5 | coding    | 0. 336      | 246   | 933   | 1088  |
| MSTRG. 6235. 4 | coding    | 0. 276      | 27    | 1077  | 1876  |
| MSTRG. 6235. 6 | coding    | 0. 274      | 0     | 1194  | 8169  |
| MSTRG. 6235. 7 | noncoding | -0. 0303104 | 1929  | 2514  | 7907  |
| MSTRG. 6235. 8 | coding    | 0. 185      | 4830  | 6147  | 6304  |
| MSTRG. 6235. 9 | coding    | 0. 174      | 4800  | 6588  | 7384  |
| MSTRG. 6238. 2 | coding    | 0. 482      | 0     | 3219  | 4774  |
| MSTRG. 6240. 1 | noncoding | -0. 0385024 | 327   | 1455  | 3461  |
| MSTRG. 6238. 3 | noncoding | -0. 1048576 | 0     | 678   | 834   |
| MSTRG. 6242. 1 | noncoding | -0. 04096   | 621   | 741   | 1273  |
| MSTRG. 6237. 2 | noncoding | -0. 036864  | 2337  | 2838  | 3586  |
| MSTRG. 6237. 3 | coding    | 0. 292      | 1113  | 2328  | 3004  |
| MSTRG. 6237. 4 | coding    | 0. 313      | 504   | 2505  | 3280  |
| MSTRG. 6237. 5 | coding    | 0. 257      | 1017  | 4023  | 4800  |
| MSTRG. 6251. 1 | coding    | 0. 301      | 0     | 3006  | 5923  |
| MSTRG. 6251. 2 | coding    | 0. 28       | 0     | 1626  | 9067  |
| MSTRG. 6251. 3 | coding    | 0. 266      | 1821  | 4359  | 7187  |
| MSTRG. 6251. 4 | coding    | 0. 291      | 13683 | 15921 | 18747 |
| MSTRG. 6251. 5 | coding    | 0. 318      | 4230  | 5598  | 8424  |
| MSTRG. 6251. 7 | coding    | 0. 318      | 1563  | 2931  | 3287  |
| MSTRG. 6251. 8 | noncoding | -0. 0364544 | 4086  | 4332  | 5815  |
| MSTRG. 6252. 1 | noncoding | -0. 0630784 | 111   | 549   | 3487  |
| MSTRG. 6253. 1 | coding    | 0. 346      | 102   | 3885  | 5208  |
| MSTRG. 6253. 2 | coding    | 0. 346      | 162   | 3942  | 4854  |
| MSTRG. 6253. 3 | coding    | 0. 365      | 501   | 4032  | 5354  |
| MSTRG. 6253. 5 | coding    | 0. 394      | 33    | 3225  | 4087  |
| MSTRG. 6248. 1 | noncoding | -0. 0557056 | 396   | 591   | 773   |
| MSTRG. 6267. 3 | noncoding | -0. 004096  | 111   | 231   | 1254  |
| MSTRG. 6271. 1 | coding    | 0. 079      | 132   | 4581  | 7105  |
| MSTRG. 6271. 3 | coding    | 0. 056      | 1383  | 4458  | 6848  |
| MSTRG. 6272. 1 | coding    | 0. 132      | 2787  | 3261  | 3658  |
| MSTRG. 6273. 2 | coding    | 0. 044      | 444   | 1515  | 5670  |
| MSTRG. 6273. 3 | coding    | 0. 029      | 1560  | 2136  | 6257  |
| MSTRG. 6274. 2 | coding    | 0. 064      | 60    | 324   | 744   |
| MSTRG. 6285. 1 | noncoding | -0. 0331776 | 225   | 507   | 1856  |
| MSTRG. 6288. 1 | noncoding | -0. 0004096 | 120   | 120   | 403   |
| MSTRG. 6312. 1 | coding    | 0. 503      | 0     | 861   | 10245 |
| MSTRG. 6312. 2 | coding    | 0. 327      | 0     | 1689  | 3656  |
| MSTRG. 6314. 1 | noncoding | -0. 331776  | 51    | 66    | 2004  |
| MSTRG. 6312. 8 | coding    | 0. 525      | 234   | 762   | 6546  |
| MSTRG. 6315. 1 | noncoding | -0. 028672  | 8199  | 8268  | 11184 |
| MSTRG. 6316. 1 | noncoding | -0. 0118784 | 1092  | 1170  | 6954  |
| MSTRG. 6314. 2 | noncoding | -0. 004096  | 5760  | 5838  | 11130 |
| MSTRG. 6314. 3 | noncoding | -0. 004096  | 1983  | 2061  | 6799  |
| MSTRG. 6314. 4 | noncoding | -0. 004096  | 2220  | 2298  | 6131  |
| MSTRG. 6317. 1 | noncoding | -0. 0188416 | 3120  | 3264  | 4392  |
| MSTRG. 6316. 2 | coding    | 0. 087      | 11703 | 12024 | 15599 |

|                |           |             |      |      |       |
|----------------|-----------|-------------|------|------|-------|
| MSTRG. 6318. 1 | noncoding | -0. 0057344 | 18   | 42   | 3067  |
| MSTRG. 6316. 3 | noncoding | -0. 0622592 | 2187 | 2220 | 2505  |
| MSTRG. 6316. 4 | coding    | 0. 05       | 87   | 174  | 1528  |
| MSTRG. 6316. 5 | noncoding | -0. 0364544 | 6177 | 6387 | 20842 |
| MSTRG. 6316. 6 | noncoding | -0. 0045056 | 2919 | 3111 | 8309  |
| MSTRG. 6319. 1 | noncoding | -0. 012288  | 81   | 219  | 467   |
| MSTRG. 6319. 2 | noncoding | -0. 08192   | 3    | 81   | 330   |
| MSTRG. 6319. 3 | noncoding | -0. 012288  | 48   | 186  | 484   |
| MSTRG. 6320. 1 | noncoding | -0. 0004096 | 0    | 0    | 1277  |
| MSTRG. 6323. 2 | noncoding | -0. 02048   | 3693 | 3861 | 13730 |
| MSTRG. 6308. 4 | noncoding | -0. 0282624 | 3204 | 3417 | 6026  |
| MSTRG. 6327. 1 | coding    | 0. 05       | 159  | 2601 | 3707  |
| MSTRG. 6328. 1 | noncoding | -0. 008192  | 345  | 417  | 945   |
| MSTRG. 6332. 2 | coding    | 0. 311      | 0    | 228  | 1230  |
| MSTRG. 6332. 3 | coding    | 0. 311      | 0    | 228  | 4765  |
| MSTRG. 6333. 1 | noncoding | -0. 0180224 | 159  | 309  | 566   |
| MSTRG. 6334. 2 | coding    | 0. 158      | 303  | 804  | 1188  |
| MSTRG. 6348. 1 | noncoding | -0. 045056  | 861  | 879  | 1033  |
| MSTRG. 6348. 2 | noncoding | -0. 0282624 | 2016 | 2115 | 6248  |
| MSTRG. 6349. 2 | coding    | 0. 204      | 267  | 4332 | 6205  |
| MSTRG. 6349. 1 | coding    | 0. 204      | 267  | 4356 | 7983  |
| MSTRG. 6349. 3 | coding    | 0. 203      | 249  | 4356 | 8029  |
| MSTRG. 6349. 4 | coding    | 0. 206      | 243  | 4308 | 7935  |
| MSTRG. 6349. 5 | coding    | 0. 206      | 243  | 4308 | 6119  |
| MSTRG. 6349. 6 | coding    | 0. 201      | 225  | 4356 | 6282  |
| MSTRG. 6349. 7 | coding    | 0. 206      | 171  | 4236 | 6109  |
| MSTRG. 6349. 8 | coding    | 0. 206      | 171  | 4236 | 8513  |
| MSTRG. 6350. 1 | noncoding | -0. 0499712 | 207  | 534  | 689   |
| MSTRG. 6351. 1 | noncoding | -0. 036864  | 5508 | 5532 | 7826  |
| MSTRG. 6351. 3 | coding    | 0. 322      | 0    | 1242 | 6332  |
| MSTRG. 6355. 5 | noncoding | -0. 26624   | 270  | 306  | 2498  |
| MSTRG. 6355. 4 | coding    | 0. 454      | 0    | 507  | 9869  |
| MSTRG. 6356. 1 | noncoding | -0. 024576  | 1071 | 1140 | 1294  |
| MSTRG. 6357. 1 | noncoding | -0. 110592  | 321  | 378  | 953   |
| MSTRG. 6355. 6 | noncoding | -0. 0057344 | 429  | 474  | 1396  |
| MSTRG. 6358. 1 | noncoding | -0. 118784  | 1101 | 1185 | 3894  |
| MSTRG. 6359. 1 | noncoding | -0. 02048   | 2568 | 2670 | 3620  |
| MSTRG. 6359. 2 | noncoding | -0. 012288  | 3117 | 3192 | 5656  |
| MSTRG. 6355. 7 | noncoding | -0. 3076096 | 0    | 189  | 1799  |
| MSTRG. 6360. 1 | noncoding | -0. 057344  | 1413 | 1461 | 1990  |
| MSTRG. 6363. 1 | coding    | 0. 085      | 2025 | 3018 | 3563  |
| MSTRG. 6364. 1 | coding    | 0. 101      | 1380 | 1596 | 1978  |
| MSTRG. 6384. 1 | noncoding | -0. 0479232 | 822  | 1008 | 3449  |
| MSTRG. 6385. 1 | noncoding | -0. 028672  | 1098 | 1188 | 2381  |
| MSTRG. 6386. 1 | noncoding | -0. 016384  | 2571 | 2673 | 4194  |
| MSTRG. 6387. 1 | noncoding | -0. 053248  | 2676 | 2724 | 4306  |
| MSTRG. 6388. 1 | noncoding | -0. 028672  | 2358 | 2484 | 5356  |
| MSTRG. 6389. 1 | coding    | 0. 049      | 162  | 648  | 9231  |
| MSTRG. 6389. 2 | coding    | 0. 047      | 2040 | 2526 | 3648  |
| MSTRG. 6389. 3 | coding    | 0. 067      | 354  | 933  | 1769  |
| MSTRG. 6383. 2 | coding    | 0. 099      | 1686 | 4332 | 6647  |
| MSTRG. 6383. 3 | coding    | 0. 077      | 1659 | 2679 | 3488  |
| MSTRG. 6383. 4 | noncoding | -0. 0372736 | 273  | 678  | 3037  |
| MSTRG. 6379. 1 | noncoding | -0. 0004096 | 0    | 0    | 548   |



|                 |           |             |      |      |       |
|-----------------|-----------|-------------|------|------|-------|
| MSTRG. 6391. 1  | noncoding | -0. 1404928 | 2724 | 3153 | 5116  |
| MSTRG. 6404. 2  | coding    | 0. 047      | 687  | 2820 | 5754  |
| MSTRG. 6404. 3  | coding    | 0. 047      | 1020 | 3147 | 6302  |
| MSTRG. 6433. 11 | coding    | 0. 015      | 780  | 1077 | 1954  |
| MSTRG. 6433. 12 | coding    | 0. 017      | 780  | 1182 | 1937  |
| MSTRG. 6433. 15 | coding    | 0. 015      | 780  | 1077 | 1820  |
| MSTRG. 6433. 3  | coding    | 0. 015      | 519  | 816  | 1695  |
| MSTRG. 6433. 4  | coding    | 0. 042      | 648  | 1128 | 1872  |
| MSTRG. 6433. 5  | coding    | 0. 039      | 648  | 1233 | 1989  |
| MSTRG. 6433. 6  | coding    | 0. 042      | 648  | 1128 | 2006  |
| MSTRG. 6433. 8  | coding    | 0. 015      | 879  | 1176 | 1920  |
| MSTRG. 6433. 13 | coding    | 0. 015      | 1071 | 1368 | 2245  |
| MSTRG. 6433. 10 | coding    | 0. 042      | 888  | 1368 | 2246  |
| MSTRG. 6433. 14 | coding    | 0. 017      | 1119 | 1521 | 2277  |
| MSTRG. 6433. 16 | coding    | 0. 015      | 1953 | 2250 | 2993  |
| MSTRG. 6433. 7  | coding    | 0. 017      | 1173 | 1575 | 2331  |
| MSTRG. 6433. 9  | coding    | 0. 042      | 888  | 1368 | 2112  |
| MSTRG. 6435. 2  | coding    | 0. 063      | 201  | 8361 | 8595  |
| MSTRG. 6436. 2  | noncoding | -0. 0110592 | 105  | 249  | 3048  |
| MSTRG. 6430. 2  | noncoding | -0. 1196032 | 0    | 105  | 4769  |
| MSTRG. 6442. 1  | noncoding | -0. 032768  | 2160 | 2268 | 3290  |
| MSTRG. 6454. 2  | coding    | 0. 173      | 48   | 447  | 1536  |
| MSTRG. 6456. 1  | noncoding | -0. 028672  | 135  | 222  | 606   |
| MSTRG. 6456. 2  | noncoding | -0. 012288  | 54   | 156  | 593   |
| MSTRG. 6457. 4  | noncoding | -0. 0004096 | 2340 | 2466 | 2765  |
| MSTRG. 6457. 2  | noncoding | -0. 0004096 | 2448 | 2574 | 2873  |
| MSTRG. 6457. 3  | noncoding | -0. 0004096 | 2940 | 3066 | 3366  |
| MSTRG. 6457. 5  | noncoding | -0. 0004096 | 2442 | 2568 | 2866  |
| MSTRG. 6464. 3  | coding    | 0. 112      | 174  | 519  | 1591  |
| MSTRG. 6478. 1  | coding    | 0. 124      | 456  | 2067 | 4657  |
| MSTRG. 6497. 2  | coding    | 0. 043      | 2058 | 2364 | 2846  |
| MSTRG. 6497. 3  | coding    | 0. 11       | 39   | 342  | 2263  |
| MSTRG. 6497. 4  | coding    | 0. 132      | 0    | 3972 | 5380  |
| MSTRG. 6497. 5  | coding    | 0. 132      | 0    | 3972 | 5704  |
| MSTRG. 6497. 6  | coding    | 0. 133      | 0    | 3978 | 5602  |
| MSTRG. 6497. 7  | coding    | 0. 104      | 0    | 2880 | 11885 |
| MSTRG. 6497. 9  | coding    | 0. 129      | 636  | 777  | 2207  |
| MSTRG. 6497. 10 | noncoding | -0. 0770048 | 5496 | 5565 | 8200  |
| MSTRG. 6497. 11 | coding    | 0. 103      | 0    | 2856 | 6114  |
| MSTRG. 6501. 1  | coding    | 0. 082      | 0    | 2331 | 4041  |
| MSTRG. 6501. 2  | coding    | 0. 117      | 915  | 2415 | 4126  |
| MSTRG. 6501. 3  | coding    | 0. 117      | 1275 | 2775 | 3130  |
| MSTRG. 6501. 4  | coding    | 0. 117      | 810  | 2310 | 3711  |
| MSTRG. 6501. 5  | coding    | 0. 117      | 1335 | 2835 | 3913  |
| MSTRG. 6501. 6  | noncoding | -0. 0004096 | 447  | 552  | 3167  |
| MSTRG. 6501. 7  | coding    | 0. 117      | 162  | 1632 | 1988  |
| MSTRG. 6501. 8  | coding    | 0. 079      | 735  | 1614 | 2637  |
| MSTRG. 6502. 4  | coding    | 0. 079      | 813  | 2769 | 3323  |
| MSTRG. 6503. 1  | coding    | 0. 078      | 276  | 1602 | 2171  |
| MSTRG. 6487. 2  | coding    | 0. 04       | 2229 | 2523 | 4074  |
| MSTRG. 6487. 1  | coding    | 0. 04       | 1848 | 2142 | 3693  |
| MSTRG. 6487. 3  | coding    | 0. 04       | 1899 | 2193 | 3734  |
| MSTRG. 6489. 1  | noncoding | -0. 0753664 | 1179 | 1533 | 1688  |
| MSTRG. 6494. 1  | coding    | 0. 117      | 582  | 897  | 1562  |

|                 |           |             |       |       |       |
|-----------------|-----------|-------------|-------|-------|-------|
| MSTRG. 6496. 2  | coding    | 0. 067      | 147   | 627   | 895   |
| MSTRG. 6505. 2  | coding    | 0. 235      | 0     | 1467  | 2484  |
| MSTRG. 6507. 1  | coding    | 0. 316      | 0     | 1023  | 2289  |
| MSTRG. 6507. 2  | coding    | 0. 309      | 0     | 972   | 2204  |
| MSTRG. 6508. 2  | noncoding | -0. 1343488 | 1206  | 1767  | 3635  |
| MSTRG. 6513. 1  | coding    | 0. 311      | 0     | 807   | 1720  |
| MSTRG. 6513. 2  | coding    | 0. 299      | 0     | 687   | 1602  |
| MSTRG. 6515. 1  | noncoding | -0. 0303104 | 0     | 186   | 423   |
| MSTRG. 6520. 1  | coding    | 0. 196      | 0     | 378   | 1054  |
| MSTRG. 6522. 3  | coding    | 0. 143      | 441   | 1563  | 1994  |
| MSTRG. 6522. 4  | coding    | 0. 143      | 108   | 1230  | 1662  |
| MSTRG. 6530. 1  | coding    | 0. 239      | 243   | 1230  | 3211  |
| MSTRG. 6530. 2  | coding    | 0. 239      | 276   | 1263  | 2704  |
| MSTRG. 6530. 7  | coding    | 0. 235      | 351   | 1311  | 1857  |
| MSTRG. 6530. 11 | coding    | 0. 263      | 0     | 888   | 1273  |
| MSTRG. 6530. 13 | coding    | 0. 235      | 684   | 1644  | 2025  |
| MSTRG. 6530. 12 | coding    | 0. 235      | 819   | 1779  | 2160  |
| MSTRG. 6530. 14 | coding    | 0. 235      | 0     | 1203  | 1683  |
| MSTRG. 6530. 15 | noncoding | -0. 0188416 | 93    | 276   | 1019  |
| MSTRG. 6524. 1  | coding    | 0. 295      | 60    | 1431  | 4706  |
| MSTRG. 6524. 2  | coding    | 0. 288      | 14130 | 15690 | 18420 |
| MSTRG. 6524. 3  | coding    | 0. 183      | 0     | 2397  | 17780 |
| MSTRG. 6524. 6  | coding    | 0. 199      | 0     | 2478  | 2893  |
| MSTRG. 6524. 7  | coding    | 0. 181      | 264   | 2649  | 3055  |
| MSTRG. 6524. 8  | coding    | 0. 178      | 156   | 2490  | 2897  |
| MSTRG. 6526. 1  | coding    | 0. 181      | 933   | 2046  | 2200  |
| MSTRG. 6527. 2  | coding    | 0. 273      | 444   | 1029  | 1184  |
| MSTRG. 6527. 3  | coding    | 0. 273      | 264   | 849   | 1004  |
| MSTRG. 6538. 3  | coding    | 0. 4        | 177   | 1707  | 1867  |
| MSTRG. 6544. 1  | coding    | 0. 34       | 0     | 4398  | 4951  |
| MSTRG. 6544. 3  | coding    | 0. 334      | 0     | 4440  | 4992  |
| MSTRG. 6540. 2  | coding    | 0. 232      | 0     | 378   | 2129  |
| MSTRG. 6546. 1  | coding    | 0. 522      | 51    | 1272  | 1802  |
| MSTRG. 6550. 2  | coding    | 0. 558      | 0     | 1227  | 1771  |
| MSTRG. 6550. 3  | coding    | 0. 582      | 99    | 1251  | 1793  |
| MSTRG. 6550. 5  | coding    | 0. 57       | 0     | 1194  | 1707  |
| MSTRG. 6550. 6  | coding    | 0. 582      | 63    | 1215  | 1729  |
| MSTRG. 6551. 1  | coding    | 0. 354      | 0     | 375   | 3271  |
| MSTRG. 6551. 2  | coding    | 0. 548      | 0     | 180   | 2445  |
| MSTRG. 6551. 3  | coding    | 0. 507      | 0     | 258   | 2994  |
| MSTRG. 6554. 1  | coding    | 0. 392      | 0     | 2010  | 2557  |
| MSTRG. 6555. 1  | noncoding | -0. 0380928 | 345   | 615   | 772   |
| MSTRG. 6562. 1  | coding    | 0. 374      | 0     | 5943  | 11808 |
| MSTRG. 6562. 3  | noncoding | -0. 129024  | 84    | 411   | 7926  |
| MSTRG. 6568. 1  | noncoding | -0. 0331776 | 1014  | 1233  | 1989  |
| MSTRG. 6567. 6  | noncoding | -0. 034816  | 126   | 375   | 955   |
| MSTRG. 6564. 2  | coding    | 0. 276      | 0     | 414   | 728   |
| MSTRG. 6564. 3  | noncoding | -0. 167936  | 0     | 375   | 2083  |
| MSTRG. 6577. 3  | coding    | 0. 391      | 0     | 1029  | 3077  |
| MSTRG. 6577. 2  | coding    | 0. 398      | 0     | 1980  | 4618  |
| MSTRG. 6582. 3  | coding    | 0. 225      | 0     | 1617  | 3012  |
| MSTRG. 6582. 2  | coding    | 0. 225      | 0     | 1617  | 3448  |
| MSTRG. 6582. 1  | coding    | 0. 225      | 0     | 1638  | 2136  |
| MSTRG. 6582. 4  | coding    | 0. 207      | 1029  | 2649  | 3140  |

|                 |           |             |       |       |       |
|-----------------|-----------|-------------|-------|-------|-------|
| MSTRG. 6585. 1  | noncoding | -0. 034816  | 984   | 1377  | 1570  |
| MSTRG. 6587. 1  | noncoding | -0. 0114688 | 291   | 381   | 2663  |
| MSTRG. 6589. 2  | noncoding | -0. 2732032 | 0     | 93    | 2073  |
| MSTRG. 6591. 2  | coding    | 0. 075      | 975   | 2562  | 2889  |
| MSTRG. 6591. 3  | coding    | 0. 063      | 0     | 2007  | 2321  |
| MSTRG. 6592. 1  | coding    | 0. 108      | 108   | 7902  | 8172  |
| MSTRG. 6592. 2  | coding    | 0. 109      | 81    | 7875  | 11450 |
| MSTRG. 6594. 2  | coding    | 0. 163      | 87    | 2130  | 3313  |
| MSTRG. 6594. 3  | coding    | 0. 165      | 396   | 2604  | 3931  |
| MSTRG. 6598. 1  | noncoding | -0. 032768  | 729   | 885   | 2967  |
| MSTRG. 6601. 4  | coding    | 0. 18       | 0     | 192   | 498   |
| MSTRG. 6605. 1  | coding    | 0. 473      | 18    | 1023  | 3084  |
| MSTRG. 6606. 2  | coding    | 0. 184      | 0     | 378   | 3036  |
| MSTRG. 6614. 1  | noncoding | -0. 018432  | 510   | 1110  | 2293  |
| MSTRG. 6614. 2  | noncoding | -0. 0540672 | 3717  | 4251  | 5597  |
| MSTRG. 6612. 3  | coding    | 0. 167      | 279   | 2505  | 2745  |
| MSTRG. 6624. 2  | coding    | 0. 394      | 27    | 1377  | 1566  |
| MSTRG. 6624. 3  | coding    | 0. 39       | 237   | 1665  | 1853  |
| MSTRG. 6624. 4  | coding    | 0. 356      | 369   | 1848  | 2003  |
| MSTRG. 6624. 5  | coding    | 0. 385      | 27    | 1284  | 1440  |
| MSTRG. 6624. 7  | coding    | 0. 348      | 525   | 1908  | 2064  |
| MSTRG. 6624. 6  | coding    | 0. 338      | 438   | 1929  | 2084  |
| MSTRG. 6624. 8  | coding    | 0. 361      | 27    | 1092  | 1398  |
| MSTRG. 6624. 9  | coding    | 0. 345      | 27    | 729   | 1256  |
| MSTRG. 6624. 10 | coding    | 0. 317      | 108   | 1644  | 1800  |
| MSTRG. 6624. 11 | coding    | 0. 373      | 462   | 1740  | 1894  |
| MSTRG. 6626. 1  | noncoding | -0. 0004096 | 0     | 0     | 301   |
| MSTRG. 6627. 1  | coding    | 0. 34       | 81    | 1617  | 3234  |
| MSTRG. 6627. 2  | coding    | 0. 373      | 0     | 1443  | 1714  |
| MSTRG. 6627. 3  | coding    | 0. 369      | 0     | 1521  | 1792  |
| MSTRG. 6627. 4  | coding    | 0. 374      | 0     | 1383  | 1633  |
| MSTRG. 6627. 5  | coding    | 0. 381      | 0     | 1452  | 1722  |
| MSTRG. 6627. 6  | coding    | 0. 379      | 0     | 1440  | 1710  |
| MSTRG. 6627. 7  | coding    | 0. 376      | 0     | 1356  | 1626  |
| MSTRG. 6622. 2  | coding    | 0. 369      | 111   | 1719  | 2011  |
| MSTRG. 6622. 3  | noncoding | -0. 1056768 | 0     | 231   | 408   |
| MSTRG. 6622. 4  | coding    | 0. 388      | 0     | 1527  | 1823  |
| MSTRG. 6633. 1  | coding    | 0. 294      | 333   | 17988 | 20646 |
| MSTRG. 6633. 2  | coding    | 0. 293      | 333   | 17952 | 20610 |
| MSTRG. 6633. 7  | coding    | 0. 278      | 105   | 12081 | 12236 |
| MSTRG. 6633. 5  | coding    | 0. 297      | 105   | 17436 | 20093 |
| MSTRG. 6634. 2  | coding    | 0. 334      | 1200  | 1851  | 2538  |
| MSTRG. 6629. 2  | coding    | 0. 413      | 0     | 582   | 888   |
| MSTRG. 6636. 3  | coding    | 0. 349      | 648   | 1734  | 2680  |
| MSTRG. 6636. 4  | coding    | 0. 373      | 12    | 1839  | 2784  |
| MSTRG. 6636. 5  | coding    | 0. 349      | 732   | 1818  | 2764  |
| MSTRG. 6636. 6  | coding    | 0. 349      | 504   | 1590  | 2536  |
| MSTRG. 6638. 2  | coding    | 0. 504      | 117   | 1200  | 1730  |
| MSTRG. 6639. 2  | coding    | 0. 095      | 0     | 195   | 480   |
| MSTRG. 6639. 3  | noncoding | -0. 036864  | 57    | 153   | 439   |
| MSTRG. 6640. 3  | coding    | 0. 09       | 333   | 2136  | 2291  |
| MSTRG. 6640. 4  | coding    | 0. 091      | 11187 | 13032 | 13186 |
| MSTRG. 6644. 4  | coding    | 0. 158      | 438   | 1248  | 1912  |
| MSTRG. 6644. 6  | coding    | 0. 124      | 621   | 1329  | 2067  |

|                |           |             |       |       |       |
|----------------|-----------|-------------|-------|-------|-------|
| MSTRG. 6644. 7 | coding    | 0. 158      | 567   | 1377  | 2114  |
| MSTRG. 6644. 8 | coding    | 0. 149      | 708   | 1401  | 2070  |
| MSTRG. 6652. 1 | noncoding | -0. 1040384 | 0     | 780   | 1024  |
| MSTRG. 6660. 1 | coding    | 0. 241      | 486   | 1296  | 2623  |
| MSTRG. 6660. 2 | coding    | 0. 241      | 282   | 1092  | 2348  |
| MSTRG. 6660. 5 | coding    | 0. 242      | 4050  | 4860  | 6047  |
| MSTRG. 6661. 5 | coding    | 0. 385      | 123   | 2616  | 3093  |
| MSTRG. 6661. 7 | coding    | 0. 385      | 342   | 2850  | 3327  |
| MSTRG. 6661. 3 | coding    | 0. 383      | 24    | 2580  | 3058  |
| MSTRG. 6662. 6 | coding    | 0. 1        | 849   | 2307  | 4431  |
| MSTRG. 6662. 7 | coding    | 0. 1        | 882   | 2340  | 4464  |
| MSTRG. 6657. 1 | coding    | 0. 394      | 1146  | 3726  | 3930  |
| MSTRG. 6670. 1 | noncoding | -0. 0004096 | 396   | 465   | 2087  |
| MSTRG. 6681. 1 | coding    | 0. 143      | 12288 | 12498 | 12823 |
| MSTRG. 6682. 1 | coding    | 0. 034      | 5076  | 6021  | 8820  |
| MSTRG. 6685. 1 | coding    | 0. 463      | 951   | 1923  | 2726  |
| MSTRG. 6678. 2 | noncoding | -0. 0004096 | 0     | 0     | 214   |
| MSTRG. 6698. 1 | coding    | 0. 046      | 84    | 201   | 355   |
| MSTRG. 6705. 1 | coding    | 0. 091      | 279   | 927   | 12135 |
| MSTRG. 6708. 1 | noncoding | -0. 0524288 | 5568  | 5676  | 8962  |
| MSTRG. 6709. 1 | noncoding | -0. 002048  | 2028  | 2163  | 6153  |
| MSTRG. 6710. 1 | noncoding | -0. 0925696 | 1440  | 1467  | 3506  |
| MSTRG. 6707. 3 | coding    | 0. 099      | 3615  | 4644  | 5798  |
| MSTRG. 6707. 4 | coding    | 0. 087      | 3351  | 4332  | 7136  |
| MSTRG. 6711. 1 | noncoding | -0. 04096   | 1554  | 1701  | 2089  |
| MSTRG. 6713. 1 | noncoding | -0. 0004096 | 0     | 0     | 262   |
| MSTRG. 6714. 1 | noncoding | -0. 0004096 | 648   | 819   | 2288  |
| MSTRG. 6714. 2 | coding    | 0. 04       | 342   | 456   | 1951  |
| MSTRG. 6714. 3 | coding    | 0. 04       | 3720  | 3834  | 5183  |
| MSTRG. 6714. 4 | coding    | 0. 04       | 342   | 456   | 3760  |
| MSTRG. 6714. 5 | noncoding | -0. 022528  | 345   | 372   | 1478  |
| MSTRG. 6715. 1 | noncoding | -0. 045056  | 3093  | 3198  | 4309  |
| MSTRG. 6694. 1 | noncoding | -0. 0004096 | 2052  | 2238  | 3255  |
| MSTRG. 6694. 2 | noncoding | -0. 0208896 | 1305  | 1416  | 1648  |
| MSTRG. 6695. 1 | noncoding | -0. 049152  | 48    | 123   | 1786  |
| MSTRG. 6694. 3 | noncoding | -0. 008192  | 7872  | 7971  | 8893  |
| MSTRG. 6694. 4 | noncoding | -0. 036864  | 2118  | 2154  | 3408  |
| MSTRG. 6726. 2 | noncoding | -0. 0618496 | 0     | 459   | 3320  |
| MSTRG. 6739. 2 | noncoding | -0. 012288  | 5685  | 5847  | 7327  |
| MSTRG. 6739. 4 | noncoding | -0. 04096   | 381   | 489   | 643   |
| MSTRG. 6740. 2 | noncoding | -0. 02048   | 2061  | 2169  | 5005  |
| MSTRG. 6741. 3 | coding    | 0. 075      | 330   | 1173  | 1362  |
| MSTRG. 6741. 4 | coding    | 0. 115      | 735   | 1110  | 1298  |
| MSTRG. 6741. 5 | coding    | 0. 079      | 0     | 834   | 1559  |
| MSTRG. 6744. 1 | noncoding | -0. 0385024 | 123   | 498   | 1320  |
| MSTRG. 6744. 2 | noncoding | -0. 0565248 | 651   | 834   | 1976  |
| MSTRG. 6748. 3 | noncoding | -0. 0770048 | 0     | 3039  | 3796  |
| MSTRG. 6750. 2 | coding    | 0. 042      | 1002  | 1206  | 2407  |
| MSTRG. 6756. 1 | noncoding | -0. 114688  | 2865  | 2955  | 5811  |
| MSTRG. 6757. 1 | coding    | 0. 089      | 1881  | 2520  | 2848  |
| MSTRG. 6760. 1 | noncoding | -0. 016384  | 2436  | 2631  | 5922  |
| MSTRG. 6762. 1 | noncoding | -0. 0004096 | 861   | 1074  | 10197 |
| MSTRG. 6763. 1 | coding    | 0. 137      | 144   | 345   | 1930  |
| MSTRG. 6761. 4 | coding    | 0. 04       | 1662  | 2343  | 3628  |

|                 |           |             |       |       |       |
|-----------------|-----------|-------------|-------|-------|-------|
| MSTRG. 6761. 5  | coding    | 0. 04       | 1605  | 2286  | 3571  |
| MSTRG. 6761. 6  | coding    | 0. 04       | 1503  | 2184  | 3434  |
| MSTRG. 6764. 1  | noncoding | -0. 057344  | 162   | 192   | 451   |
| MSTRG. 6774. 1  | noncoding | -0. 036864  | 4740  | 4836  | 5154  |
| MSTRG. 6775. 1  | coding    | 0. 073      | 4689  | 4851  | 5694  |
| MSTRG. 6776. 1  | coding    | 0. 156      | 1791  | 2061  | 2775  |
| MSTRG. 6777. 1  | coding    | 0. 101      | 798   | 1125  | 1765  |
| MSTRG. 6776. 2  | noncoding | -0. 0421888 | 330   | 333   | 1429  |
| MSTRG. 6777. 2  | noncoding | -0. 053248  | 21    | 60    | 546   |
| MSTRG. 6778. 1  | noncoding | -0. 069632  | 2127  | 2190  | 3076  |
| MSTRG. 6777. 3  | coding    | 0. 101      | 2562  | 2889  | 3585  |
| MSTRG. 6777. 5  | coding    | 0. 048      | 5040  | 5220  | 5860  |
| MSTRG. 6780. 1  | noncoding | -0. 0176128 | 1608  | 1773  | 2408  |
| MSTRG. 6781. 3  | noncoding | -0. 0913408 | 0     | 66    | 946   |
| MSTRG. 6781. 4  | noncoding | -0. 0360448 | 18    | 174   | 1626  |
| MSTRG. 6785. 2  | noncoding | -0. 0376832 | 1941  | 2022  | 2176  |
| MSTRG. 6786. 1  | noncoding | -0. 0557056 | 1572  | 1773  | 2240  |
| MSTRG. 6786. 2  | noncoding | -0. 135168  | 90    | 102   | 708   |
| MSTRG. 6792. 5  | coding    | 0. 157      | 837   | 1479  | 1710  |
| MSTRG. 6797. 3  | coding    | 0. 063      | 624   | 3258  | 3776  |
| MSTRG. 6797. 4  | coding    | 0. 011      | 36    | 540   | 1669  |
| MSTRG. 6798. 1  | noncoding | -0. 053248  | 1830  | 1926  | 2354  |
| MSTRG. 6800. 1  | noncoding | -0. 0172032 | 129   | 276   | 5361  |
| MSTRG. 6806. 2  | coding    | 0. 118      | 1461  | 2553  | 3331  |
| MSTRG. 6804. 1  | coding    | 0. 226      | 42    | 552   | 965   |
| MSTRG. 6817. 3  | coding    | 0. 067      | 3624  | 4167  | 5689  |
| MSTRG. 6823. 1  | noncoding | -0. 049152  | 21    | 240   | 3707  |
| MSTRG. 6811. 1  | noncoding | -0. 08192   | 48    | 117   | 1592  |
| MSTRG. 6811. 2  | noncoding | -0. 049152  | 375   | 399   | 1500  |
| MSTRG. 6857. 1  | noncoding | -0. 118784  | 0     | 837   | 17223 |
| MSTRG. 6857. 2  | coding    | 0. 235      | 2562  | 4587  | 5758  |
| MSTRG. 6857. 3  | coding    | 0. 248      | 0     | 3912  | 5066  |
| MSTRG. 6857. 4  | coding    | 0. 234      | 2502  | 4524  | 6051  |
| MSTRG. 6857. 5  | noncoding | -0. 008192  | 40386 | 40659 | 40847 |
| MSTRG. 6857. 6  | noncoding | -0. 0159744 | 5760  | 5925  | 19909 |
| MSTRG. 6857. 7  | coding    | 0. 062      | 11499 | 12078 | 31708 |
| MSTRG. 6857. 8  | noncoding | -0. 0049152 | 25845 | 25983 | 80663 |
| MSTRG. 6859. 1  | noncoding | -0. 0262144 | 3621  | 3789  | 5162  |
| MSTRG. 6859. 2  | coding    | 0. 151      | 5655  | 5937  | 10485 |
| MSTRG. 6859. 3  | noncoding | -0. 0106496 | 17910 | 18036 | 20457 |
| MSTRG. 6859. 4  | coding    | 0. 151      | 13467 | 13749 | 18157 |
| MSTRG. 6860. 1  | noncoding | -0. 0258048 | 4107  | 4290  | 9631  |
| MSTRG. 6861. 1  | coding    | 0. 105      | 14136 | 14376 | 15402 |
| MSTRG. 6861. 2  | coding    | 0. 105      | 14082 | 14322 | 16720 |
| MSTRG. 6857. 9  | noncoding | -0. 012288  | 24258 | 24396 | 45971 |
| MSTRG. 6857. 10 | noncoding | -0. 0217088 | 11229 | 11403 | 23811 |
| MSTRG. 6857. 11 | noncoding | -0. 0217088 | 11718 | 11892 | 16785 |
| MSTRG. 6857. 12 | noncoding | -0. 0217088 | 11769 | 11943 | 16837 |
| MSTRG. 6857. 13 | noncoding | -0. 0159744 | 516   | 681   | 6125  |
| MSTRG. 6857. 14 | noncoding | -0. 0372736 | 192   | 252   | 1269  |
| MSTRG. 6857. 15 | noncoding | -0. 0139264 | 10200 | 10332 | 41708 |
| MSTRG. 6863. 1  | coding    | 0. 032      | 5784  | 6129  | 17379 |
| MSTRG. 6864. 1  | noncoding | -0. 0188416 | 3534  | 3687  | 19751 |
| MSTRG. 6864. 2  | noncoding | -0. 0004096 | 981   | 1029  | 2902  |

|                 |           |             |      |      |       |
|-----------------|-----------|-------------|------|------|-------|
| MSTRG. 6857. 16 | noncoding | -0. 0004096 | 153  | 252  | 3542  |
| MSTRG. 6865. 1  | noncoding | -0. 0024576 | 1302 | 1398 | 4823  |
| MSTRG. 6857. 17 | coding    | 0. 23       | 1584 | 4851 | 6504  |
| MSTRG. 6857. 19 | coding    | 0. 203      | 12   | 1335 | 1713  |
| MSTRG. 6866. 1  | coding    | 0. 097      | 4617 | 5277 | 5618  |
| MSTRG. 6857. 20 | coding    | 0. 231      | 732  | 2367 | 3785  |
| MSTRG. 6857. 21 | coding    | 0. 238      | 666  | 2577 | 4197  |
| MSTRG. 6857. 22 | coding    | 0. 231      | 213  | 1845 | 2221  |
| MSTRG. 6857. 23 | coding    | 0. 232      | 348  | 1935 | 3016  |
| MSTRG. 6827. 2  | noncoding | -0. 1048576 | 0    | 321  | 2708  |
| MSTRG. 6837. 1  | noncoding | -0. 0008192 | 162  | 276  | 2037  |
| MSTRG. 6838. 1  | noncoding | -0. 03072   | 285  | 351  | 854   |
| MSTRG. 6839. 1  | coding    | 0. 068      | 1257 | 1422 | 2214  |
| MSTRG. 6845. 1  | noncoding | -0. 02048   | 135  | 147  | 305   |
| MSTRG. 6851. 1  | coding    | 0. 1        | 2298 | 2502 | 2707  |
| MSTRG. 6851. 2  | noncoding | -0. 0004096 | 498  | 540  | 2155  |
| MSTRG. 6852. 1  | noncoding | -0. 0258048 | 150  | 267  | 2171  |
| MSTRG. 6869. 1  | coding    | 0. 128      | 264  | 528  | 2475  |
| MSTRG. 6871. 2  | noncoding | -0. 0360448 | 99   | 105  | 820   |
| MSTRG. 6873. 2  | coding    | 0. 546      | 0    | 333  | 3154  |
| MSTRG. 6873. 3  | coding    | 0. 546      | 0    | 333  | 3009  |
| MSTRG. 6884. 1  | coding    | 0. 23       | 693  | 3849 | 8610  |
| MSTRG. 6885. 1  | noncoding | -0. 012288  | 312  | 426  | 5434  |
| MSTRG. 6886. 1  | coding    | 0. 06       | 1890 | 3246 | 5426  |
| MSTRG. 6887. 1  | noncoding | -0. 008192  | 795  | 1029 | 6580  |
| MSTRG. 6888. 1  | noncoding | -0. 002048  | 7401 | 7509 | 12726 |
| MSTRG. 6901. 1  | noncoding | -0. 0094208 | 960  | 1113 | 3211  |
| MSTRG. 6906. 7  | coding    | 0. 165      | 0    | 621  | 7343  |
| MSTRG. 6906. 8  | coding    | 0. 189      | 0    | 531  | 1999  |
| MSTRG. 6906. 9  | coding    | 0. 1        | 4113 | 4494 | 5712  |
| MSTRG. 6906. 10 | coding    | 0. 189      | 0    | 531  | 983   |
| MSTRG. 6907. 1  | coding    | 0. 137      | 1515 | 1716 | 3509  |
| MSTRG. 6902. 1  | noncoding | -0. 0004096 | 0    | 0    | 239   |
| MSTRG. 6919. 1  | noncoding | -0. 016384  | 2868 | 2922 | 3718  |
| MSTRG. 6920. 1  | noncoding | -0. 008192  | 1479 | 1629 | 5443  |
| MSTRG. 6921. 1  | noncoding | -0. 073728  | 243  | 282  | 3224  |
| MSTRG. 6922. 4  | noncoding | -0. 0950272 | 6    | 594  | 4523  |
| MSTRG. 6922. 3  | coding    | 0. 221      | 6    | 2883 | 5210  |
| MSTRG. 6922. 5  | noncoding | -0. 024576  | 1509 | 1629 | 15303 |
| MSTRG. 6923. 1  | noncoding | -0. 016384  | 471  | 474  | 739   |
| MSTRG. 6925. 1  | noncoding | -0. 077824  | 1149 | 1218 | 1374  |
| MSTRG. 6925. 2  | noncoding | -0. 032768  | 144  | 225  | 1452  |
| MSTRG. 6925. 3  | noncoding | -0. 032768  | 195  | 276  | 910   |
| MSTRG. 6926. 1  | noncoding | -0. 110592  | 135  | 213  | 560   |
| MSTRG. 6934. 1  | coding    | 0. 104      | 402  | 987  | 1984  |
| MSTRG. 6939. 3  | coding    | 0. 225      | 387  | 705  | 1378  |
| MSTRG. 6941. 1  | coding    | 0. 338      | 63   | 1224 | 1703  |
| MSTRG. 6941. 2  | coding    | 0. 333      | 63   | 1218 | 1697  |
| MSTRG. 6943. 1  | coding    | 0. 216      | 1194 | 1788 | 2104  |
| MSTRG. 6943. 2  | coding    | 0. 216      | 1485 | 2079 | 2396  |
| MSTRG. 6943. 4  | coding    | 0. 213      | 720  | 1269 | 1586  |
| MSTRG. 6945. 2  | coding    | 0. 31       | 288  | 2310 | 2695  |
| MSTRG. 6947. 3  | coding    | 0. 214      | 120  | 3123 | 3884  |
| MSTRG. 6947. 4  | coding    | 0. 218      | 120  | 3027 | 3788  |

|                 |           |             |      |      |      |
|-----------------|-----------|-------------|------|------|------|
| MSTRG. 6947. 6  | coding    | 0. 222      | 0    | 3126 | 3889 |
| MSTRG. 6948. 1  | noncoding | -0. 0073728 | 144  | 330  | 6522 |
| MSTRG. 6947. 7  | coding    | 0. 214      | 1209 | 4212 | 4973 |
| MSTRG. 6947. 8  | coding    | 0. 22       | 12   | 1725 | 2488 |
| MSTRG. 6956. 3  | coding    | 0. 325      | 426  | 2499 | 6712 |
| MSTRG. 6962. 4  | coding    | 0. 161      | 195  | 549  | 808  |
| MSTRG. 6962. 5  | coding    | 0. 191      | 192  | 762  | 1019 |
| MSTRG. 6966. 4  | coding    | 0. 277      | 0    | 5541 | 7943 |
| MSTRG. 6967. 3  | coding    | 0. 234      | 81   | 495  | 6244 |
| MSTRG. 6970. 3  | coding    | 0. 429      | 21   | 3561 | 4230 |
| MSTRG. 6973. 5  | coding    | 0. 306      | 93   | 3117 | 3270 |
| MSTRG. 6974. 1  | coding    | 0. 337      | 12   | 660  | 853  |
| MSTRG. 6975. 1  | coding    | 0. 271      | 48   | 1287 | 2875 |
| MSTRG. 6985. 1  | coding    | 0. 404      | 0    | 3240 | 8955 |
| MSTRG. 6986. 1  | coding    | 0. 247      | 75   | 807  | 1253 |
| MSTRG. 6986. 4  | coding    | 0. 254      | 36   | 696  | 1047 |
| MSTRG. 6988. 1  | noncoding | -0. 032768  | 369  | 468  | 1067 |
| MSTRG. 6997. 1  | noncoding | -0. 0413696 | 867  | 1293 | 1503 |
| MSTRG. 6997. 2  | noncoding | -0. 0413696 | 660  | 1086 | 1296 |
| MSTRG. 6995. 2  | noncoding | -0. 053248  | 0    | 78   | 474  |
| MSTRG. 6995. 4  | noncoding | -0. 008192  | 228  | 318  | 541  |
| MSTRG. 6995. 3  | noncoding | -0. 02048   | 117  | 207  | 557  |
| MSTRG. 6995. 5  | noncoding | -0. 008192  | 240  | 330  | 544  |
| MSTRG. 6977. 1  | coding    | 0. 187      | 156  | 492  | 686  |
| MSTRG. 6977. 2  | coding    | 0. 131      | 165  | 762  | 1005 |
| MSTRG. 6977. 3  | coding    | 0. 133      | 156  | 756  | 957  |
| MSTRG. 6977. 4  | coding    | 0. 176      | 0    | 504  | 901  |
| MSTRG. 6977. 5  | noncoding | -0. 0790528 | 294  | 540  | 786  |
| MSTRG. 6980. 3  | coding    | 0. 209      | 294  | 1893 | 2490 |
| MSTRG. 6980. 2  | coding    | 0. 206      | 504  | 2181 | 2777 |
| MSTRG. 6981. 6  | coding    | 0. 292      | 57   | 612  | 3244 |
| MSTRG. 6981. 4  | coding    | 0. 271      | 663  | 1248 | 3878 |
| MSTRG. 6981. 5  | coding    | 0. 271      | 720  | 1305 | 3937 |
| MSTRG. 7007. 1  | coding    | 0. 236      | 2886 | 3813 | 5009 |
| MSTRG. 7007. 2  | coding    | 0. 286      | 0    | 2214 | 8271 |
| MSTRG. 7007. 4  | coding    | 0. 181      | 498  | 1488 | 2445 |
| MSTRG. 7007. 5  | coding    | 0. 282      | 54   | 2283 | 7614 |
| MSTRG. 7008. 2  | coding    | 0. 206      | 198  | 663  | 970  |
| MSTRG. 7007. 11 | coding    | 0. 263      | 603  | 2982 | 3410 |
| MSTRG. 6982. 1  | coding    | 0. 315      | 174  | 903  | 1452 |
| MSTRG. 6983. 1  | noncoding | -0. 02048   | 846  | 858  | 1210 |
| MSTRG. 6982. 3  | coding    | 0. 328      | 222  | 756  | 1305 |
| MSTRG. 7005. 3  | coding    | 0. 123      | 93   | 573  | 948  |
| MSTRG. 7006. 1  | coding    | 0. 456      | 0    | 1170 | 3179 |
| MSTRG. 7012. 2  | coding    | 0. 28       | 855  | 1632 | 1808 |
| MSTRG. 7019. 1  | noncoding | -0. 0024576 | 1029 | 1173 | 3721 |
| MSTRG. 7035. 2  | coding    | 0. 08       | 420  | 1974 | 4148 |
| MSTRG. 7041. 4  | noncoding | -0. 118784  | 315  | 375  | 884  |
| MSTRG. 7044. 1  | noncoding | -0. 008192  | 594  | 675  | 895  |
| MSTRG. 7050. 1  | noncoding | -0. 0004096 | 0    | 0    | 478  |
| MSTRG. 7050. 3  | noncoding | -0. 0004096 | 0    | 0    | 623  |
| MSTRG. 7050. 2  | noncoding | -0. 008192  | 342  | 423  | 2291 |
| MSTRG. 7054. 1  | noncoding | -0. 0925696 | 0    | 72   | 225  |
| MSTRG. 7075. 4  | coding    | 0. 216      | 0    | 1122 | 2073 |

|                |           |             |      |      |       |
|----------------|-----------|-------------|------|------|-------|
| MSTRG. 7075. 5 | coding    | 0. 04       | 183  | 318  | 1093  |
| MSTRG. 7079. 1 | coding    | 0. 085      | 0    | 1599 | 1826  |
| MSTRG. 7083. 1 | noncoding | -0. 0503808 | 393  | 423  | 580   |
| MSTRG. 7077. 3 | coding    | 0. 034      | 606  | 1188 | 1556  |
| MSTRG. 7091. 3 | coding    | 0. 05       | 1746 | 2838 | 3934  |
| MSTRG. 7091. 5 | noncoding | -0. 0745472 | 3723 | 3996 | 4363  |
| MSTRG. 7091. 4 | noncoding | -0. 08192   | 3915 | 4206 | 4575  |
| MSTRG. 7096. 1 | noncoding | -0. 0172032 | 1323 | 1566 | 2799  |
| MSTRG. 7102. 1 | coding    | 0. 102      | 0    | 336  | 3395  |
| MSTRG. 7102. 2 | coding    | 0. 069      | 153  | 765  | 3816  |
| MSTRG. 7102. 3 | noncoding | -0. 024576  | 2877 | 3006 | 3245  |
| MSTRG. 7103. 1 | coding    | 0. 037      | 330  | 702  | 1785  |
| MSTRG. 7104. 1 | coding    | 0. 204      | 159  | 2928 | 3162  |
| MSTRG. 7110. 1 | noncoding | -0. 032768  | 111  | 207  | 405   |
| MSTRG. 7111. 3 | coding    | 0. 562      | 0    | 285  | 1591  |
| MSTRG. 7111. 4 | coding    | 0. 567      | 0    | 237  | 1557  |
| MSTRG. 7111. 5 | coding    | 0. 561      | 0    | 234  | 1332  |
| MSTRG. 7118. 2 | coding    | 0. 034      | 27   | 240  | 1004  |
| MSTRG. 7122. 3 | coding    | 0. 2        | 180  | 567  | 796   |
| MSTRG. 7130. 2 | coding    | 0. 234      | 0    | 5619 | 6180  |
| MSTRG. 7130. 3 | coding    | 0. 235      | 144  | 5604 | 5984  |
| MSTRG. 7130. 4 | coding    | 0. 279      | 249  | 1584 | 2144  |
| MSTRG. 7135. 3 | noncoding | -0. 03072   | 210  | 393  | 838   |
| MSTRG. 7135. 4 | noncoding | -0. 0004096 | 156  | 297  | 451   |
| MSTRG. 7138. 2 | coding    | 0. 419      | 0    | 306  | 3340  |
| MSTRG. 7141. 1 | coding    | 0. 207      | 0    | 1773 | 3478  |
| MSTRG. 7141. 3 | coding    | 0. 153      | 12   | 1479 | 3425  |
| MSTRG. 7142. 1 | noncoding | -0. 0237568 | 66   | 324  | 4798  |
| MSTRG. 7147. 3 | coding    | 0. 06       | 264  | 387  | 1097  |
| MSTRG. 7147. 2 | coding    | 0. 154      | 885  | 1155 | 2980  |
| MSTRG. 7146. 1 | noncoding | -0. 0004096 | 0    | 0    | 255   |
| MSTRG. 7154. 2 | coding    | 0. 215      | 0    | 1932 | 2799  |
| MSTRG. 7154. 5 | coding    | 0. 215      | 0    | 1932 | 2814  |
| MSTRG. 7154. 6 | noncoding | -0. 0196608 | 2823 | 3003 | 3158  |
| MSTRG. 7156. 1 | coding    | 0. 415      | 1311 | 2640 | 6242  |
| MSTRG. 7161. 1 | coding    | 0. 224      | 228  | 2316 | 3931  |
| MSTRG. 7161. 2 | coding    | 0. 219      | 228  | 2280 | 12280 |
| MSTRG. 7162. 1 | coding    | 0. 103      | 498  | 852  | 1811  |
| MSTRG. 7164. 1 | coding    | 0. 052      | 315  | 774  | 1256  |
| MSTRG. 7165. 1 | coding    | 0. 069      | 171  | 411  | 1867  |
| MSTRG. 7165. 2 | coding    | 0. 076      | 1623 | 2259 | 3498  |
| MSTRG. 7166. 1 | noncoding | -0. 0360448 | 3192 | 3561 | 3716  |
| MSTRG. 7169. 1 | noncoding | -0. 0356352 | 750  | 840  | 1097  |
| MSTRG. 7177. 1 | noncoding | -0. 016384  | 2301 | 2382 | 3241  |
| MSTRG. 7178. 1 | coding    | 0. 202      | 0    | 246  | 2058  |
| MSTRG. 7178. 2 | coding    | 0. 226      | 0    | 264  | 641   |
| MSTRG. 7177. 2 | noncoding | -0. 0188416 | 1485 | 1632 | 3338  |
| MSTRG. 7177. 3 | noncoding | -0. 0188416 | 1485 | 1632 | 3196  |
| MSTRG. 7177. 4 | noncoding | -0. 0188416 | 1485 | 1632 | 3283  |
| MSTRG. 7177. 8 | noncoding | -0. 0188416 | 1413 | 1560 | 3178  |
| MSTRG. 7177. 7 | noncoding | -0. 0188416 | 1449 | 1596 | 3476  |
| MSTRG. 7177. 6 | noncoding | -0. 0188416 | 1932 | 2079 | 3875  |
| MSTRG. 7177. 5 | noncoding | -0. 0188416 | 1938 | 2085 | 3792  |
| MSTRG. 7177. 9 | noncoding | -0. 004096  | 0    | 24   | 2502  |



|                 |           |             |       |       |       |
|-----------------|-----------|-------------|-------|-------|-------|
| MSTRG. 7177. 10 | noncoding | -0. 0188416 | 1449  | 1596  | 3260  |
| MSTRG. 7177. 11 | noncoding | -0. 0188416 | 1449  | 1596  | 2717  |
| MSTRG. 7177. 12 | noncoding | -0. 0188416 | 1449  | 1596  | 2893  |
| MSTRG. 7177. 15 | noncoding | -0. 0643072 | 0     | 87    | 1682  |
| MSTRG. 7177. 16 | noncoding | -0. 024576  | 0     | 159   | 1620  |
| MSTRG. 7177. 13 | noncoding | -0. 0188416 | 1449  | 1596  | 3279  |
| MSTRG. 7177. 14 | noncoding | -0. 0188416 | 1449  | 1596  | 3365  |
| MSTRG. 7177. 18 | noncoding | -0. 08192   | 11958 | 12054 | 13479 |
| MSTRG. 7177. 19 | noncoding | -0. 06144   | 3204  | 3288  | 4866  |
| MSTRG. 7179. 1  | noncoding | -0. 053248  | 3051  | 3123  | 7196  |
| MSTRG. 7172. 1  | noncoding | -0. 0315392 | 7248  | 7380  | 9074  |
| MSTRG. 7176. 7  | coding    | 0. 157      | 1431  | 2628  | 3360  |
| MSTRG. 7176. 4  | coding    | 0. 144      | 0     | 2691  | 3424  |
| MSTRG. 7176. 5  | coding    | 0. 157      | 1263  | 2460  | 3192  |
| MSTRG. 7176. 6  | coding    | 0. 151      | 1263  | 2481  | 3213  |
| MSTRG. 7183. 1  | coding    | 0. 242      | 0     | 1515  | 9818  |
| MSTRG. 7183. 3  | coding    | 0. 242      | 0     | 1515  | 4823  |
| MSTRG. 7189. 1  | noncoding | -0. 0733184 | 9258  | 9744  | 9899  |
| MSTRG. 7191. 3  | coding    | 0. 142      | 327   | 1260  | 3166  |
| MSTRG. 7194. 1  | noncoding | -0. 032768  | 873   | 993   | 1975  |
| MSTRG. 7195. 1  | coding    | 0. 291      | 75    | 939   | 4695  |
| MSTRG. 7195. 2  | coding    | 0. 293      | 108   | 990   | 2541  |
| MSTRG. 7196. 1  | coding    | 0. 11       | 8520  | 8826  | 13350 |
| MSTRG. 7195. 3  | coding    | 0. 262      | 252   | 756   | 4367  |
| MSTRG. 7186. 1  | noncoding | -0. 06144   | 0     | 30    | 481   |
| MSTRG. 7197. 3  | coding    | 0. 248      | 0     | 1752  | 3426  |
| MSTRG. 7200. 2  | coding    | 0. 647      | 0     | 2247  | 2438  |
| MSTRG. 7200. 3  | coding    | 0. 638      | 0     | 2349  | 2541  |
| MSTRG. 7202. 1  | noncoding | -0. 006144  | 2847  | 3012  | 3279  |
| MSTRG. 7206. 4  | coding    | 0. 277      | 0     | 1308  | 5888  |
| MSTRG. 7206. 5  | coding    | 0. 217      | 237   | 1305  | 3293  |
| MSTRG. 7206. 6  | coding    | 0. 217      | 333   | 1398  | 1602  |
| MSTRG. 7207. 1  | noncoding | -0. 002048  | 4173  | 4320  | 4524  |
| MSTRG. 7206. 7  | noncoding | -0. 1753088 | 0     | 189   | 9169  |
| MSTRG. 7211. 1  | noncoding | -0. 03072   | 669   | 1203  | 1773  |
| MSTRG. 7213. 1  | noncoding | -0. 0884736 | 0     | 435   | 1418  |
| MSTRG. 7216. 2  | coding    | 0. 476      | 183   | 1818  | 2031  |
| MSTRG. 7220. 2  | coding    | 0. 33       | 168   | 723   | 1202  |
| MSTRG. 7220. 3  | coding    | 0. 233      | 36    | 360   | 864   |
| MSTRG. 7220. 4  | noncoding | -0. 0741376 | 246   | 441   | 598   |
| MSTRG. 7225. 1  | coding    | 0. 227      | 0     | 1839  | 4424  |
| MSTRG. 7227. 1  | coding    | 0. 411      | 171   | 960   | 2806  |
| MSTRG. 7232. 2  | noncoding | -0. 024576  | 16698 | 17427 | 17882 |
| MSTRG. 7232. 3  | noncoding | -0. 024576  | 12051 | 12780 | 13235 |
| MSTRG. 7232. 1  | coding    | 0. 565      | 354   | 3066  | 19555 |
| MSTRG. 7232. 4  | coding    | 0. 565      | 321   | 3033  | 17949 |
| MSTRG. 7232. 5  | coding    | 0. 565      | 4890  | 7602  | 22517 |
| MSTRG. 7232. 6  | noncoding | -0. 024576  | 15192 | 15921 | 16380 |
| MSTRG. 7235. 3  | coding    | 0. 537      | 0     | 3222  | 4014  |
| MSTRG. 7235. 4  | coding    | 0. 568      | 0     | 2511  | 2668  |
| MSTRG. 7245. 1  | noncoding | -0. 09216   | 336   | 546   | 700   |
| MSTRG. 7258. 7  | coding    | 0. 033      | 1752  | 3378  | 4183  |
| MSTRG. 7258. 6  | coding    | 0. 045      | 102   | 1956  | 2760  |
| MSTRG. 7258. 5  | coding    | 0. 042      | 123   | 2010  | 2814  |

|                 |           |             |      |       |       |
|-----------------|-----------|-------------|------|-------|-------|
| MSTRG. 7260. 1  | noncoding | -0. 0516096 | 1008 | 1164  | 3204  |
| MSTRG. 7262. 3  | coding    | 0. 08       | 360  | 2526  | 5589  |
| MSTRG. 7262. 5  | noncoding | -0. 049152  | 651  | 765   | 7545  |
| MSTRG. 7263. 1  | coding    | 0. 135      | 537  | 762   | 13470 |
| MSTRG. 7263. 2  | noncoding | -0. 004096  | 4017 | 4155  | 8104  |
| MSTRG. 7264. 1  | noncoding | -0. 397312  | 1155 | 1170  | 2102  |
| MSTRG. 7266. 9  | coding    | 0. 069      | 2892 | 3978  | 6237  |
| MSTRG. 7266. 12 | noncoding | -0. 0946176 | 0    | 102   | 2219  |
| MSTRG. 7268. 1  | noncoding | -0. 233472  | 240  | 297   | 452   |
| MSTRG. 7269. 5  | noncoding | -0. 004096  | 498  | 627   | 782   |
| MSTRG. 7269. 7  | noncoding | -0. 004096  | 435  | 564   | 718   |
| MSTRG. 7269. 3  | noncoding | -0. 057344  | 465  | 564   | 1679  |
| MSTRG. 7269. 4  | noncoding | -0. 0176128 | 6    | 168   | 769   |
| MSTRG. 7269. 6  | noncoding | -0. 028672  | 4134 | 4362  | 9114  |
| MSTRG. 7269. 8  | noncoding | -0. 036864  | 2622 | 2673  | 3271  |
| MSTRG. 7269. 9  | noncoding | -0. 0249856 | 2946 | 3066  | 3608  |
| MSTRG. 7270. 1  | noncoding | -0. 016384  | 414  | 534   | 1678  |
| MSTRG. 7271. 1  | noncoding | -0. 049152  | 309  | 426   | 4198  |
| MSTRG. 7277. 1  | noncoding | -0. 006144  | 1218 | 1368  | 1535  |
| MSTRG. 7278. 1  | noncoding | -0. 02048   | 1398 | 1521  | 6771  |
| MSTRG. 7279. 1  | noncoding | -0. 032768  | 1098 | 1215  | 8112  |
| MSTRG. 7276. 3  | coding    | 0. 113      | 9990 | 10365 | 11344 |
| MSTRG. 7276. 4  | coding    | 0. 118      | 4344 | 6096  | 11063 |
| MSTRG. 7281. 1  | noncoding | -0. 0692224 | 0    | 78    | 287   |
| MSTRG. 7281. 2  | noncoding | -0. 0692224 | 0    | 78    | 540   |
| MSTRG. 7286. 10 | coding    | 0. 126      | 0    | 1575  | 3536  |
| MSTRG. 7286. 3  | coding    | 0. 066      | 0    | 2958  | 3495  |
| MSTRG. 7286. 5  | coding    | 0. 069      | 0    | 2898  | 3435  |
| MSTRG. 7286. 7  | coding    | 0. 093      | 0    | 2691  | 3229  |
| MSTRG. 7286. 8  | coding    | 0. 135      | 0    | 1446  | 3285  |
| MSTRG. 7286. 9  | coding    | 0. 081      | 0    | 2775  | 3312  |
| MSTRG. 7286. 11 | coding    | 0. 064      | 0    | 2844  | 3381  |
| MSTRG. 7286. 17 | coding    | 0. 088      | 600  | 1086  | 1623  |
| MSTRG. 7292. 1  | coding    | 0. 241      | 0    | 1368  | 3316  |
| MSTRG. 7292. 3  | coding    | 0. 283      | 312  | 1101  | 1301  |
| MSTRG. 7293. 3  | coding    | 0. 071      | 3    | 948   | 6223  |
| MSTRG. 7296. 1  | coding    | 0. 362      | 2580 | 4836  | 6432  |
| MSTRG. 7297. 3  | coding    | 0. 201      | 258  | 3201  | 5024  |
| MSTRG. 7297. 5  | coding    | 0. 199      | 258  | 3201  | 5024  |
| MSTRG. 7298. 1  | noncoding | -0. 0004096 | 1095 | 1197  | 1752  |
| MSTRG. 7300. 1  | noncoding | -0. 028672  | 3615 | 3747  | 6445  |
| MSTRG. 7297. 6  | coding    | 0. 11       | 0    | 342   | 1926  |
| MSTRG. 7297. 7  | noncoding | -0. 0180224 | 1377 | 1539  | 6933  |
| MSTRG. 7295. 2  | noncoding | -0. 0356352 | 282  | 450   | 2327  |
| MSTRG. 7303. 1  | noncoding | -0. 0004096 | 3027 | 3159  | 5645  |
| MSTRG. 7306. 1  | coding    | 0. 248      | 0    | 315   | 2926  |
| MSTRG. 7306. 2  | coding    | 0. 141      | 411  | 729   | 1074  |
| MSTRG. 7316. 1  | coding    | 0. 064      | 957  | 1563  | 4327  |
| MSTRG. 7317. 1  | noncoding | -0. 077824  | 1812 | 1893  | 2818  |
| MSTRG. 7322. 4  | coding    | 0. 158      | 558  | 1764  | 2250  |
| MSTRG. 7322. 5  | coding    | 0. 158      | 252  | 1458  | 1946  |
| MSTRG. 7323. 1  | noncoding | -0. 0004096 | 0    | 0     | 475   |
| MSTRG. 7323. 2  | noncoding | -0. 012288  | 351  | 405   | 880   |
| MSTRG. 7325. 1  | noncoding | -0. 0008192 | 30   | 177   | 402   |

|                 |           |             |      |      |       |
|-----------------|-----------|-------------|------|------|-------|
| MSTRG. 7320. 1  | noncoding | -0. 057344  | 18   | 36   | 436   |
| MSTRG. 7320. 2  | noncoding | -0. 053248  | 84   | 141  | 628   |
| MSTRG. 7321. 1  | noncoding | -0. 147456  | 96   | 141  | 305   |
| MSTRG. 7333. 5  | coding    | 0. 055      | 0    | 1164 | 2181  |
| MSTRG. 7335. 2  | coding    | 0. 226      | 417  | 2511 | 2956  |
| MSTRG. 7335. 4  | coding    | 0. 226      | 429  | 2523 | 2969  |
| MSTRG. 7335. 5  | coding    | 0. 228      | 714  | 2787 | 3233  |
| MSTRG. 7335. 8  | coding    | 0. 228      | 735  | 2829 | 3276  |
| MSTRG. 7335. 9  | coding    | 0. 218      | 654  | 2853 | 3300  |
| MSTRG. 7335. 10 | coding    | 0. 236      | 312  | 1974 | 2420  |
| MSTRG. 7335. 11 | coding    | 0. 344      | 417  | 855  | 1302  |
| MSTRG. 7335. 12 | coding    | 0. 358      | 417  | 876  | 1323  |
| MSTRG. 7335. 13 | coding    | 0. 359      | 231  | 702  | 1148  |
| MSTRG. 7340. 2  | coding    | 0. 218      | 0    | 819  | 4856  |
| MSTRG. 7340. 3  | coding    | 0. 099      | 750  | 984  | 4604  |
| MSTRG. 7340. 4  | noncoding | -0. 016384  | 3156 | 3264 | 4366  |
| MSTRG. 7341. 1  | noncoding | -0. 14336   | 60   | 108  | 264   |
| MSTRG. 7342. 1  | noncoding | -0. 0483328 | 3306 | 3735 | 3974  |
| MSTRG. 7343. 1  | coding    | 0. 108      | 3117 | 3342 | 3840  |
| MSTRG. 7344. 4  | noncoding | -0. 008192  | 1671 | 1776 | 2252  |
| MSTRG. 7346. 1  | noncoding | -0. 032768  | 144  | 174  | 550   |
| MSTRG. 7348. 1  | coding    | 0. 228      | 0    | 105  | 258   |
| MSTRG. 7350. 1  | coding    | 0. 125      | 177  | 966  | 1792  |
| MSTRG. 7354. 2  | coding    | 0. 055      | 1002 | 1152 | 3600  |
| MSTRG. 7359. 1  | noncoding | -0. 0004096 | 174  | 174  | 383   |
| MSTRG. 7370. 1  | noncoding | -0. 0139264 | 1764 | 1974 | 5079  |
| MSTRG. 7371. 1  | noncoding | -0. 028672  | 858  | 972  | 7826  |
| MSTRG. 7369. 3  | coding    | 0. 131      | 90   | 378  | 1542  |
| MSTRG. 7372. 1  | noncoding | -0. 02048   | 5157 | 5265 | 6608  |
| MSTRG. 7373. 1  | noncoding | -0. 0004096 | 1083 | 1164 | 3861  |
| MSTRG. 7374. 1  | noncoding | -0. 012288  | 7695 | 7770 | 7923  |
| MSTRG. 7366. 2  | coding    | 0. 152      | 0    | 3327 | 3877  |
| MSTRG. 7365. 1  | noncoding | -0. 0004096 | 0    | 0    | 392   |
| MSTRG. 7390. 1  | noncoding | -0. 04096   | 735  | 792  | 1094  |
| MSTRG. 7392. 1  | noncoding | -0. 114688  | 849  | 900  | 4953  |
| MSTRG. 7393. 1  | coding    | 0. 265      | 0    | 84   | 239   |
| MSTRG. 7394. 1  | noncoding | -0. 0483328 | 0    | 135  | 745   |
| MSTRG. 7376. 3  | coding    | 0. 085      | 795  | 993  | 1902  |
| MSTRG. 7376. 5  | coding    | 0. 085      | 717  | 915  | 1825  |
| MSTRG. 7382. 1  | noncoding | -0. 036864  | 1290 | 1374 | 3073  |
| MSTRG. 7385. 1  | noncoding | -0. 004096  | 828  | 849  | 1196  |
| MSTRG. 7387. 1  | coding    | 0. 136      | 1500 | 2331 | 5962  |
| MSTRG. 7415. 2  | coding    | 0. 159      | 294  | 2670 | 3930  |
| MSTRG. 7415. 4  | noncoding | -0. 0053248 | 7152 | 7218 | 9285  |
| MSTRG. 7415. 3  | coding    | 0. 159      | 7335 | 9711 | 10971 |
| MSTRG. 7415. 5  | coding    | 0. 083      | 7626 | 7887 | 15571 |
| MSTRG. 7415. 6  | noncoding | -0. 0352256 | 555  | 720  | 11258 |
| MSTRG. 7415. 7  | coding    | 0. 159      | 2193 | 4569 | 5828  |
| MSTRG. 7421. 3  | coding    | 0. 383      | 0    | 615  | 1146  |
| MSTRG. 7423. 4  | coding    | 0. 126      | 543  | 1128 | 1467  |
| MSTRG. 7423. 2  | coding    | 0. 126      | 777  | 1362 | 1701  |
| MSTRG. 7423. 3  | coding    | 0. 126      | 507  | 1092 | 1430  |
| MSTRG. 7426. 1  | coding    | 0. 264      | 774  | 3744 | 4384  |
| MSTRG. 7431. 1  | coding    | 0. 163      | 666  | 1275 | 1589  |

|                |           |             |      |      |       |
|----------------|-----------|-------------|------|------|-------|
| MSTRG. 7431. 2 | coding    | 0. 228      | 483  | 1230 | 1839  |
| MSTRG. 7432. 1 | coding    | 0. 174      | 462  | 1230 | 2181  |
| MSTRG. 7432. 9 | coding    | 0. 122      | 1386 | 1806 | 6151  |
| MSTRG. 7432. 5 | coding    | 0. 105      | 0    | 3372 | 8305  |
| MSTRG. 7432. 6 | coding    | 0. 11       | 1755 | 5421 | 9765  |
| MSTRG. 7432. 7 | coding    | 0. 109      | 0    | 3801 | 8146  |
| MSTRG. 7434. 1 | noncoding | -0. 008192  | 408  | 429  | 582   |
| MSTRG. 7429. 1 | noncoding | -0. 0253952 | 426  | 591  | 1623  |
| MSTRG. 7429. 2 | noncoding | -0. 028672  | 336  | 456  | 1949  |
| MSTRG. 7437. 1 | noncoding | -0. 1236992 | 0    | 18   | 266   |
| MSTRG. 7438. 1 | coding    | 0. 24       | 222  | 699  | 2902  |
| MSTRG. 7439. 4 | coding    | 0. 214      | 126  | 1005 | 1197  |
| MSTRG. 7441. 1 | coding    | 0. 327      | 21   | 1947 | 5113  |
| MSTRG. 7448. 1 | noncoding | -0. 0106496 | 531  | 660  | 1726  |
| MSTRG. 7448. 2 | noncoding | -0. 006144  | 462  | 612  | 767   |
| MSTRG. 7452. 1 | coding    | 0. 357      | 1086 | 2970 | 6167  |
| MSTRG. 7452. 3 | coding    | 0. 357      | 738  | 2622 | 5766  |
| MSTRG. 7454. 1 | noncoding | -0. 036864  | 1875 | 1977 | 3527  |
| MSTRG. 7451. 2 | coding    | 0. 111      | 492  | 1407 | 1980  |
| MSTRG. 7455. 1 | coding    | 0. 171      | 0    | 4605 | 5305  |
| MSTRG. 7455. 2 | coding    | 0. 184      | 0    | 4857 | 10131 |
| MSTRG. 7456. 6 | coding    | 0. 148      | 237  | 1266 | 2138  |
| MSTRG. 7456. 7 | coding    | 0. 148      | 234  | 1263 | 1788  |
| MSTRG. 7456. 8 | coding    | 0. 173      | 66   | 1134 | 1659  |
| MSTRG. 7458. 1 | noncoding | -0. 008192  | 180  | 267  | 423   |
| MSTRG. 7457. 3 | noncoding | -0. 0016384 | 4056 | 4200 | 7432  |
| MSTRG. 7462. 1 | noncoding | -0. 036864  | 36   | 51   | 381   |
| MSTRG. 7467. 1 | coding    | 0. 356      | 162  | 1263 | 1966  |
| MSTRG. 7465. 1 | coding    | 0. 168      | 204  | 1485 | 2955  |
| MSTRG. 7470. 1 | noncoding | -0. 0004096 | 0    | 0    | 298   |
| MSTRG. 7474. 2 | coding    | 0. 295      | 48   | 540  | 808   |
| MSTRG. 7476. 1 | noncoding | -0. 083968  | 0    | 42   | 457   |
| MSTRG. 7487. 1 | noncoding | -0. 385024  | 435  | 444  | 815   |
| MSTRG. 7485. 2 | coding    | 0. 09       | 93   | 1353 | 1625  |
| MSTRG. 7499. 1 | coding    | 0. 324      | 33   | 2997 | 3933  |
| MSTRG. 7496. 1 | coding    | 0. 102      | 402  | 618  | 855   |
| MSTRG. 7501. 1 | noncoding | -0. 0393216 | 540  | 654  | 2269  |
| MSTRG. 7505. 1 | coding    | 0. 247      | 732  | 2196 | 4735  |
| MSTRG. 7505. 2 | coding    | 0. 247      | 888  | 2352 | 4892  |
| MSTRG. 7518. 1 | noncoding | -0. 118784  | 174  | 240  | 3186  |
| MSTRG. 7529. 1 | noncoding | -0. 0131072 | 360  | 528  | 703   |
| MSTRG. 7529. 2 | noncoding | -0. 0131072 | 345  | 513  | 925   |
| MSTRG. 7531. 1 | noncoding | -0. 0208896 | 318  | 483  | 990   |
| MSTRG. 7534. 1 | noncoding | -0. 0229376 | 0    | 129  | 291   |
| MSTRG. 7537. 4 | coding    | 0. 432      | 177  | 2154 | 3230  |
| MSTRG. 7538. 1 | coding    | 0. 314      | 51   | 927  | 1080  |
| MSTRG. 7539. 1 | coding    | 0. 397      | 30   | 2178 | 2384  |
| MSTRG. 7541. 1 | coding    | 0. 249      | 195  | 1014 | 1310  |
| MSTRG. 7542. 1 | noncoding | -0. 0139264 | 870  | 1035 | 1271  |
| MSTRG. 7539. 2 | coding    | 0. 405      | 312  | 2379 | 2804  |
| MSTRG. 7544. 2 | coding    | 0. 325      | 0    | 456  | 1015  |
| MSTRG. 7551. 1 | coding    | 0. 279      | 234  | 4086 | 4557  |
| MSTRG. 7551. 2 | coding    | 0. 292      | 243  | 3876 | 4347  |
| MSTRG. 7552. 1 | noncoding | -0. 0581632 | 342  | 573  | 729   |

|                |           |             |      |      |      |
|----------------|-----------|-------------|------|------|------|
| MSTRG. 7552. 3 | noncoding | -0. 0217088 | 24   | 513  | 668  |
| MSTRG. 7552. 2 | noncoding | -0. 0065536 | 39   | 480  | 634  |
| MSTRG. 7556. 2 | coding    | 0. 542      | 666  | 3168 | 3799 |
| MSTRG. 7557. 1 | coding    | 0. 228      | 942  | 1803 | 2050 |
| MSTRG. 7557. 2 | coding    | 0. 226      | 801  | 1659 | 1906 |
| MSTRG. 7557. 3 | coding    | 0. 224      | 546  | 1386 | 1632 |
| MSTRG. 7557. 4 | noncoding | -0. 073728  | 630  | 1161 | 1397 |
| MSTRG. 7557. 5 | coding    | 0. 227      | 807  | 1665 | 1912 |
| MSTRG. 7557. 6 | coding    | 0. 226      | 537  | 1392 | 1638 |
| MSTRG. 7560. 3 | coding    | 0. 513      | 18   | 699  | 1593 |
| MSTRG. 7562. 6 | coding    | 0. 33       | 78   | 1827 | 2828 |
| MSTRG. 7562. 7 | coding    | 0. 349      | 537  | 2337 | 3336 |
| MSTRG. 7562. 8 | coding    | 0. 361      | 57   | 1533 | 2533 |
| MSTRG. 7563. 1 | coding    | 0. 262      | 249  | 1308 | 2133 |
| MSTRG. 7563. 2 | coding    | 0. 434      | 0    | 429  | 1444 |
| MSTRG. 7563. 4 | coding    | 0. 422      | 0    | 573  | 933  |
| MSTRG. 7573. 4 | coding    | 0. 445      | 0    | 5691 | 6126 |
| MSTRG. 7573. 5 | coding    | 0. 442      | 0    | 5676 | 6111 |
| MSTRG. 7585. 1 | noncoding | -0. 0487424 | 378  | 636  | 7673 |
| MSTRG. 7572. 1 | coding    | 0. 291      | 0    | 1332 | 2161 |
| MSTRG. 7572. 2 | coding    | 0. 251      | 165  | 1296 | 2125 |
| MSTRG. 7580. 2 | coding    | 0. 285      | 0    | 1665 | 2347 |
| MSTRG. 7588. 2 | coding    | 0. 271      | 129  | 870  | 1383 |
| MSTRG. 7591. 2 | coding    | 0. 402      | 261  | 8637 | 8870 |
| MSTRG. 7591. 3 | coding    | 0. 402      | 129  | 8505 | 8741 |
| MSTRG. 7591. 4 | coding    | 0. 287      | 0    | 942  | 1175 |
| MSTRG. 7592. 1 | coding    | 0. 371      | 0    | 1191 | 1415 |
| MSTRG. 7594. 1 | noncoding | -0. 008192  | 189  | 327  | 614  |
| MSTRG. 7597. 2 | noncoding | -0. 069632  | 81   | 141  | 422  |
| MSTRG. 7597. 1 | noncoding | -0. 0004096 | 0    | 0    | 221  |
| MSTRG. 7600. 1 | coding    | 0. 301      | 252  | 2799 | 3060 |
| MSTRG. 7604. 3 | coding    | 0. 287      | 507  | 1752 | 8045 |
| MSTRG. 7604. 4 | coding    | 0. 287      | 447  | 1692 | 9449 |
| MSTRG. 7604. 5 | noncoding | -0. 0815104 | 5055 | 5265 | 5692 |
| MSTRG. 7606. 1 | coding    | 0. 59       | 0    | 813  | 6388 |
| MSTRG. 7608. 2 | coding    | 0. 24       | 480  | 1242 | 4683 |
| MSTRG. 7611. 1 | coding    | 0. 373      | 81   | 900  | 4131 |
| MSTRG. 7617. 2 | coding    | 0. 387      | 159  | 1644 | 3403 |
| MSTRG. 7618. 3 | noncoding | -0. 0376832 | 78   | 711  | 1443 |
| MSTRG. 7618. 4 | noncoding | -0. 0376832 | 264  | 897  | 1610 |
| MSTRG. 7619. 3 | coding    | 0. 34       | 426  | 2778 | 3627 |
| MSTRG. 7621. 1 | noncoding | -0. 1134592 | 0    | 735  | 1193 |
| MSTRG. 7615. 2 | coding    | 0. 468      | 756  | 1971 | 3262 |
| MSTRG. 7615. 1 | coding    | 0. 457      | 150  | 1437 | 2728 |
| MSTRG. 7615. 3 | coding    | 0. 482      | 0    | 1290 | 2048 |
| MSTRG. 7615. 4 | coding    | 0. 481      | 237  | 1185 | 1906 |
| MSTRG. 7615. 5 | coding    | 0. 476      | 150  | 1395 | 2115 |
| MSTRG. 7616. 2 | noncoding | -0. 0454656 | 12   | 711  | 882  |
| MSTRG. 7625. 1 | coding    | 0. 572      | 36   | 2589 | 3886 |
| MSTRG. 7625. 2 | coding    | 0. 561      | 36   | 2664 | 3939 |
| MSTRG. 7626. 1 | coding    | 0. 269      | 234  | 951  | 1809 |
| MSTRG. 7626. 2 | coding    | 0. 269      | 369  | 1086 | 1929 |
| MSTRG. 7630. 2 | coding    | 0. 313      | 387  | 1944 | 6315 |
| MSTRG. 7630. 3 | coding    | 0. 309      | 1998 | 5097 | 9173 |

|                 |           |             |       |       |       |
|-----------------|-----------|-------------|-------|-------|-------|
| MSTRG. 7632. 3  | coding    | 0. 285      | 21    | 450   | 1596  |
| MSTRG. 7637. 1  | noncoding | -0. 0278528 | 714   | 1413  | 3105  |
| MSTRG. 7637. 4  | noncoding | -0. 0720896 | 1653  | 1992  | 3135  |
| MSTRG. 7637. 5  | noncoding | -0. 026624  | 627   | 1320  | 3274  |
| MSTRG. 7638. 1  | coding    | 0. 323      | 705   | 3015  | 3888  |
| MSTRG. 7638. 10 | coding    | 0. 276      | 0     | 7131  | 9552  |
| MSTRG. 7638. 11 | coding    | 0. 284      | 0     | 6657  | 9078  |
| MSTRG. 7638. 5  | coding    | 0. 278      | 0     | 7131  | 9552  |
| MSTRG. 7638. 6  | coding    | 0. 278      | 0     | 7134  | 9555  |
| MSTRG. 7638. 7  | coding    | 0. 275      | 0     | 7215  | 9636  |
| MSTRG. 7638. 8  | coding    | 0. 28       | 0     | 7050  | 9471  |
| MSTRG. 7638. 9  | coding    | 0. 288      | 0     | 6378  | 8799  |
| MSTRG. 7639. 1  | coding    | 0. 055      | 72    | 1020  | 1382  |
| MSTRG. 7638. 12 | coding    | 0. 234      | 3063  | 6357  | 8778  |
| MSTRG. 7640. 2  | coding    | 0. 24       | 18    | 1257  | 1893  |
| MSTRG. 7640. 3  | coding    | 0. 295      | 942   | 1500  | 2097  |
| MSTRG. 7642. 1  | noncoding | -0. 0720896 | 1884  | 2136  | 2291  |
| MSTRG. 7642. 2  | noncoding | -0. 0913408 | 27342 | 27768 | 27921 |
| MSTRG. 7642. 3  | noncoding | -0. 0720896 | 11706 | 11958 | 12111 |
| MSTRG. 7642. 4  | noncoding | -0. 0520192 | 5229  | 5415  | 5571  |
| MSTRG. 7634. 2  | coding    | 0. 483      | 0     | 1356  | 1736  |
| MSTRG. 7635. 1  | coding    | 0. 209      | 270   | 1467  | 3925  |
| MSTRG. 7635. 2  | coding    | 0. 209      | 258   | 1455  | 3466  |
| MSTRG. 7635. 3  | coding    | 0. 209      | 141   | 1329  | 1820  |
| MSTRG. 7635. 5  | coding    | 0. 216      | 5316  | 6549  | 9004  |
| MSTRG. 7636. 1  | noncoding | -0. 0139264 | 837   | 978   | 1923  |
| MSTRG. 7636. 2  | noncoding | -0. 0139264 | 33    | 174   | 1083  |
| MSTRG. 7650. 1  | coding    | 0. 472      | 2595  | 7269  | 8326  |
| MSTRG. 7646. 1  | coding    | 0. 342      | 522   | 1263  | 1947  |
| MSTRG. 7647. 1  | noncoding | -0. 045056  | 120   | 285   | 441   |
| MSTRG. 7659. 8  | coding    | 0. 348      | 132   | 894   | 1169  |
| MSTRG. 7660. 3  | coding    | 0. 353      | 498   | 1104  | 1595  |
| MSTRG. 7660. 5  | coding    | 0. 351      | 714   | 1317  | 1797  |
| MSTRG. 7666. 1  | coding    | 0. 485      | 2703  | 8556  | 11014 |
| MSTRG. 7666. 3  | coding    | 0. 498      | 0     | 5799  | 8099  |
| MSTRG. 7666. 4  | coding    | 0. 503      | 0     | 5685  | 7967  |
| MSTRG. 7666. 5  | coding    | 0. 483      | 90    | 5970  | 6124  |
| MSTRG. 7666. 6  | noncoding | -0. 0512    | 2022  | 2265  | 5581  |
| MSTRG. 7665. 1  | coding    | 0. 367      | 264   | 1386  | 2049  |
| MSTRG. 7668. 2  | coding    | 0. 505      | 858   | 2814  | 5022  |
| MSTRG. 7668. 3  | coding    | 0. 499      | 831   | 2838  | 3625  |
| MSTRG. 7668. 4  | coding    | 0. 495      | 9     | 1404  | 1559  |
| MSTRG. 7673. 1  | noncoding | -0. 0393216 | 369   | 1074  | 1328  |
| MSTRG. 7674. 2  | coding    | 0. 472      | 0     | 654   | 1408  |
| MSTRG. 7675. 2  | coding    | 0. 586      | 0     | 1041  | 1374  |
| MSTRG. 7680. 1  | noncoding | -0. 0356352 | 1059  | 1098  | 1583  |
| MSTRG. 7686. 3  | coding    | 0. 586      | 0     | 1299  | 1972  |
| MSTRG. 7694. 1  | noncoding | -0. 065536  | 102   | 171   | 602   |
| MSTRG. 7705. 5  | coding    | 0. 452      | 0     | 2304  | 3867  |
| MSTRG. 7703. 1  | coding    | 0. 516      | 168   | 2136  | 6273  |
| MSTRG. 7707. 1  | coding    | 0. 264      | 0     | 1107  | 1499  |
| MSTRG. 7707. 3  | coding    | 0. 262      | 0     | 1104  | 1496  |
| MSTRG. 7711. 4  | coding    | 0. 398      | 1428  | 1998  | 5275  |
| MSTRG. 7711. 5  | noncoding | -0. 1216512 | 0     | 516   | 3770  |

|                |           |             |      |      |       |
|----------------|-----------|-------------|------|------|-------|
| MSTRG. 7711. 6 | noncoding | -0. 1409024 | 0    | 618  | 3897  |
| MSTRG. 7711. 3 | coding    | 0. 38       | 0    | 852  | 4130  |
| MSTRG. 7711. 1 | coding    | 0. 247      | 3270 | 4242 | 7521  |
| MSTRG. 7717. 2 | coding    | 0. 306      | 798  | 1698 | 1880  |
| MSTRG. 7717. 1 | coding    | 0. 306      | 936  | 1836 | 2393  |
| MSTRG. 7717. 3 | coding    | 0. 367      | 294  | 1278 | 4535  |
| MSTRG. 7717. 4 | coding    | 0. 433      | 273  | 681  | 7281  |
| MSTRG. 7717. 5 | noncoding | -0. 0598016 | 240  | 450  | 630   |
| MSTRG. 7717. 8 | coding    | 0. 611      | 0    | 480  | 1110  |
| MSTRG. 7714. 2 | coding    | 0. 445      | 930  | 2751 | 4349  |
| MSTRG. 7718. 1 | coding    | 0. 623      | 0    | 1641 | 4693  |
| MSTRG. 7722. 2 | coding    | 0. 403      | 765  | 1671 | 4410  |
| MSTRG. 7722. 3 | coding    | 0. 36       | 765  | 1779 | 4145  |
| MSTRG. 7723. 1 | noncoding | -0. 0733184 | 261  | 1005 | 8901  |
| MSTRG. 7722. 5 | coding    | 0. 457      | 0    | 1251 | 4648  |
| MSTRG. 7722. 6 | coding    | 0. 403      | 258  | 1164 | 4663  |
| MSTRG. 7723. 2 | noncoding | -0. 0733184 | 888  | 1632 | 10290 |
| MSTRG. 7730. 5 | coding    | 0. 129      | 765  | 5982 | 18041 |
| MSTRG. 7730. 6 | coding    | 0. 131      | 4587 | 9891 | 22672 |
| MSTRG. 7731. 1 | noncoding | -0. 008192  | 2826 | 2946 | 3676  |
| MSTRG. 7733. 3 | coding    | 0. 481      | 39   | 2262 | 3142  |
| MSTRG. 7737. 1 | noncoding | -0. 053248  | 939  | 1047 | 1474  |
| MSTRG. 7738. 1 | coding    | 0. 212      | 150  | 1398 | 4079  |
| MSTRG. 7739. 4 | noncoding | -0. 0475136 | 0    | 60   | 314   |
| MSTRG. 7740. 2 | coding    | 0. 16       | 75   | 351  | 804   |
| MSTRG. 7742. 2 | coding    | 0. 341      | 0    | 132  | 1486  |
| MSTRG. 7742. 3 | noncoding | -0. 0405504 | 1029 | 1362 | 1515  |
| MSTRG. 7735. 1 | noncoding | -0. 0602112 | 0    | 123  | 492   |
| MSTRG. 7744. 2 | coding    | 0. 215      | 0    | 7518 | 8776  |
| MSTRG. 7745. 1 | noncoding | -0. 172032  | 1911 | 1965 | 3654  |
| MSTRG. 7747. 2 | coding    | 0. 395      | 1014 | 3429 | 5317  |
| MSTRG. 7747. 3 | coding    | 0. 415      | 684  | 2814 | 4702  |
| MSTRG. 7747. 4 | coding    | 0. 421      | 864  | 3048 | 4936  |
| MSTRG. 7747. 1 | coding    | 0. 422      | 957  | 3171 | 5309  |
| MSTRG. 7747. 5 | coding    | 0. 437      | 0    | 1788 | 4042  |
| MSTRG. 7751. 3 | coding    | 0. 523      | 258  | 1995 | 3407  |
| MSTRG. 7751. 6 | coding    | 0. 571      | 0    | 1716 | 3000  |
| MSTRG. 7751. 7 | coding    | 0. 585      | 0    | 1467 | 1820  |
| MSTRG. 7751. 8 | coding    | 0. 585      | 0    | 1467 | 1864  |
| MSTRG. 7751. 9 | coding    | 0. 581      | 0    | 1581 | 1737  |
| MSTRG. 7752. 1 | noncoding | -0. 0442368 | 87   | 675  | 1071  |
| MSTRG. 7752. 2 | noncoding | -0. 0503808 | 84   | 1101 | 1973  |
| MSTRG. 7755. 1 | coding    | 0. 583      | 0    | 825  | 3924  |
| MSTRG. 7755. 3 | coding    | 0. 524      | 240  | 1032 | 4132  |
| MSTRG. 7743. 1 | coding    | 0. 352      | 114  | 1773 | 4575  |
| MSTRG. 7758. 1 | noncoding | -0. 172032  | 96   | 144  | 300   |
| MSTRG. 7762. 2 | noncoding | -0. 088064  | 0    | 732  | 1945  |
| MSTRG. 7760. 2 | coding    | 0. 32       | 255  | 576  | 1659  |
| MSTRG. 7767. 1 | noncoding | -0. 0126976 | 453  | 579  | 735   |
| MSTRG. 7767. 2 | noncoding | -0. 04096   | 372  | 480  | 634   |
| MSTRG. 7769. 2 | coding    | 0. 405      | 183  | 786  | 3141  |
| MSTRG. 7770. 1 | noncoding | -0. 0397312 | 627  | 1317 | 1472  |
| MSTRG. 7770. 2 | noncoding | -0. 0749568 | 0    | 486  | 652   |
| MSTRG. 7771. 4 | coding    | 0. 464      | 1086 | 1641 | 2557  |

|                 |           |             |      |       |       |
|-----------------|-----------|-------------|------|-------|-------|
| MSTRG. 7772. 3  | coding    | 0. 336      | 282  | 2619  | 6010  |
| MSTRG. 7773. 2  | noncoding | -0. 0835584 | 498  | 771   | 4879  |
| MSTRG. 7780. 2  | noncoding | -0. 0004096 | 105  | 267   | 547   |
| MSTRG. 7782. 1  | coding    | 0. 242      | 2091 | 2562  | 2742  |
| MSTRG. 7782. 2  | coding    | 0. 209      | 2793 | 3243  | 3399  |
| MSTRG. 7782. 3  | coding    | 0. 209      | 510  | 960   | 1117  |
| MSTRG. 7782. 4  | coding    | 0. 209      | 6933 | 7383  | 7538  |
| MSTRG. 7782. 5  | coding    | 0. 187      | 6384 | 6852  | 7009  |
| MSTRG. 7782. 8  | noncoding | -0. 0004096 | 2646 | 3213  | 3369  |
| MSTRG. 7782. 6  | coding    | 0. 209      | 7917 | 8367  | 8524  |
| MSTRG. 7782. 7  | coding    | 0. 209      | 4554 | 5004  | 5161  |
| MSTRG. 7782. 9  | coding    | 0. 209      | 3051 | 3501  | 3657  |
| MSTRG. 7782. 10 | coding    | 0. 187      | 1140 | 1608  | 1764  |
| MSTRG. 7782. 12 | coding    | 0. 209      | 1824 | 2274  | 2429  |
| MSTRG. 7782. 13 | coding    | 0. 219      | 2094 | 2583  | 2755  |
| MSTRG. 7782. 14 | coding    | 0. 124      | 1113 | 1338  | 1493  |
| MSTRG. 7783. 1  | noncoding | -0. 0356352 | 0    | 330   | 659   |
| MSTRG. 7787. 1  | coding    | 0. 319      | 123  | 1119  | 2490  |
| MSTRG. 7790. 3  | coding    | 0. 315      | 24   | 1611  | 3709  |
| MSTRG. 7791. 1  | noncoding | -0. 0299008 | 567  | 882   | 1678  |
| MSTRG. 7794. 3  | noncoding | -0. 0499712 | 201  | 1137  | 1291  |
| MSTRG. 7795. 1  | noncoding | -0. 0278528 | 3240 | 3699  | 3855  |
| MSTRG. 7796. 3  | coding    | 0. 429      | 66   | 1272  | 1876  |
| MSTRG. 7796. 5  | coding    | 0. 376      | 9156 | 10557 | 13092 |
| MSTRG. 7796. 6  | noncoding | -0. 04096   | 489  | 1011  | 8387  |
| MSTRG. 7796. 7  | noncoding | -0. 04096   | 363  | 885   | 1809  |
| MSTRG. 7797. 1  | noncoding | -0. 024576  | 1572 | 1737  | 2654  |
| MSTRG. 7799. 2  | coding    | 0. 542      | 3192 | 4719  | 6380  |
| MSTRG. 7800. 1  | noncoding | -0. 0053248 | 306  | 606   | 760   |
| MSTRG. 7801. 2  | noncoding | -0. 0434176 | 168  | 468   | 3619  |
| MSTRG. 7801. 1  | noncoding | -0. 0679936 | 33   | 207   | 4185  |
| MSTRG. 7803. 1  | noncoding | -0. 1355776 | 0    | 366   | 928   |
| MSTRG. 7804. 2  | coding    | 0. 18       | 99   | 486   | 1022  |
| MSTRG. 7805. 1  | coding    | 0. 469      | 0    | 735   | 3200  |
| MSTRG. 7805. 3  | coding    | 0. 26       | 0    | 1278  | 2034  |
| MSTRG. 7805. 4  | noncoding | -0. 0606208 | 309  | 1683  | 1838  |
| MSTRG. 7805. 5  | coding    | 0. 289      | 0    | 1188  | 1940  |
| MSTRG. 7809. 1  | noncoding | -0. 0413696 | 63   | 1194  | 4900  |
| MSTRG. 7812. 1  | noncoding | -0. 0114688 | 6261 | 6411  | 12473 |
| MSTRG. 7815. 1  | coding    | 0. 418      | 192  | 1266  | 1655  |
| MSTRG. 7815. 3  | coding    | 0. 346      | 1851 | 3939  | 4326  |
| MSTRG. 7814. 1  | coding    | 0. 617      | 0    | 741   | 2395  |
| MSTRG. 7818. 2  | coding    | 0. 268      | 165  | 1611  | 1793  |
| MSTRG. 7818. 3  | noncoding | -0. 0339968 | 39   | 120   | 293   |
| MSTRG. 7819. 1  | noncoding | -0. 0012288 | 81   | 228   | 523   |
| MSTRG. 7821. 2  | noncoding | -0. 1114112 | 0    | 264   | 623   |
| MSTRG. 7825. 2  | coding    | 0. 628      | 0    | 1152  | 1713  |
| MSTRG. 7832. 1  | noncoding | -0. 0823296 | 0    | 261   | 6796  |
| MSTRG. 7832. 2  | noncoding | -0. 0417792 | 2541 | 2730  | 3354  |
| MSTRG. 7840. 1  | coding    | 0. 051      | 375  | 594   | 2164  |
| MSTRG. 7841. 3  | coding    | 0. 55       | 270  | 1173  | 2493  |
| MSTRG. 7842. 2  | coding    | 0. 118      | 606  | 3720  | 4268  |
| MSTRG. 7843. 2  | coding    | 0. 25       | 135  | 1026  | 1419  |
| MSTRG. 7844. 1  | coding    | 0. 23       | 36   | 1281  | 2562  |



|                 |           |             |      |      |       |
|-----------------|-----------|-------------|------|------|-------|
| MSTRG. 7844. 4  | noncoding | -0. 0708608 | 0    | 333  | 983   |
| MSTRG. 7844. 3  | coding    | 0. 24       | 0    | 1161 | 2511  |
| MSTRG. 7844. 5  | coding    | 0. 237      | 2127 | 3360 | 4637  |
| MSTRG. 7844. 6  | coding    | 0. 232      | 240  | 1455 | 2733  |
| MSTRG. 7848. 1  | noncoding | -0. 0331776 | 495  | 1503 | 2378  |
| MSTRG. 7848. 2  | noncoding | -0. 0045056 | 0    | 147  | 301   |
| MSTRG. 7854. 5  | noncoding | -0. 057344  | 312  | 3468 | 5738  |
| MSTRG. 7859. 2  | coding    | 0. 157      | 0    | 6945 | 9682  |
| MSTRG. 7859. 3  | coding    | 0. 159      | 0    | 6945 | 10841 |
| MSTRG. 7859. 1  | coding    | 0. 158      | 0    | 7011 | 10908 |
| MSTRG. 7859. 4  | coding    | 0. 167      | 0    | 6879 | 10580 |
| MSTRG. 7859. 8  | coding    | 0. 139      | 402  | 5379 | 7859  |
| MSTRG. 7859. 9  | coding    | 0. 152      | 402  | 5394 | 7877  |
| MSTRG. 7859. 7  | coding    | 0. 137      | 0    | 6504 | 8982  |
| MSTRG. 7859. 5  | coding    | 0. 161      | 0    | 6564 | 12084 |
| MSTRG. 7859. 6  | coding    | 0. 161      | 0    | 7011 | 9490  |
| MSTRG. 7859. 10 | coding    | 0. 158      | 0    | 7011 | 9086  |
| MSTRG. 7859. 11 | coding    | 0. 166      | 0    | 6954 | 9102  |
| MSTRG. 7859. 12 | coding    | 0. 158      | 0    | 6945 | 8374  |
| MSTRG. 7860. 1  | noncoding | -0. 049152  | 519  | 606  | 987   |
| MSTRG. 7859. 14 | noncoding | -0. 0208896 | 354  | 408  | 630   |
| MSTRG. 7859. 13 | coding    | 0. 165      | 0    | 6954 | 7888  |
| MSTRG. 7859. 15 | coding    | 0. 17       | 402  | 3258 | 4278  |
| MSTRG. 7859. 16 | coding    | 0. 174      | 0    | 7908 | 8371  |
| MSTRG. 7863. 1  | noncoding | -0. 0004096 | 0    | 0    | 250   |
| MSTRG. 7855. 7  | coding    | 0. 206      | 2436 | 3306 | 3794  |
| MSTRG. 7868. 7  | noncoding | -0. 094208  | 0    | 492  | 1366  |
| MSTRG. 7870. 1  | noncoding | -0. 0548864 | 2091 | 2682 | 2837  |
| MSTRG. 7866. 2  | coding    | 0. 432      | 60   | 1083 | 3036  |
| MSTRG. 7866. 3  | coding    | 0. 371      | 99   | 1281 | 3229  |
| MSTRG. 7874. 1  | noncoding | -0. 0008192 | 45   | 336  | 508   |
| MSTRG. 7873. 2  | coding    | 0. 423      | 609  | 1515 | 1727  |
| MSTRG. 7879. 1  | noncoding | -0. 0991232 | 2085 | 2337 | 5207  |
| MSTRG. 7878. 1  | noncoding | -0. 0557056 | 3201 | 3450 | 4913  |
| MSTRG. 7881. 1  | noncoding | -0. 0512    | 0    | 567  | 862   |
| MSTRG. 7881. 2  | noncoding | -0. 0364544 | 117  | 357  | 512   |
| MSTRG. 7884. 1  | noncoding | -0. 0270336 | 126  | 339  | 588   |
| MSTRG. 7891. 1  | noncoding | -0. 0098304 | 831  | 933  | 1315  |
| MSTRG. 7898. 2  | coding    | 0. 457      | 486  | 1896 | 2253  |
| MSTRG. 7889. 1  | noncoding | -0. 0483328 | 0    | 3018 | 3174  |
| MSTRG. 7903. 1  | coding    | 0. 421      | 7014 | 9882 | 10084 |
| MSTRG. 7903. 2  | coding    | 0. 355      | 3558 | 4536 | 9937  |
| MSTRG. 7903. 3  | coding    | 0. 293      | 1227 | 2202 | 4344  |
| MSTRG. 7903. 4  | coding    | 0. 348      | 3753 | 4674 | 11340 |
| MSTRG. 7905. 6  | coding    | 0. 339      | 3627 | 5772 | 6280  |
| MSTRG. 7905. 7  | coding    | 0. 145      | 5187 | 6135 | 11256 |
| MSTRG. 7915. 10 | coding    | 0. 435      | 279  | 1131 | 1543  |
| MSTRG. 7915. 11 | coding    | 0. 464      | 417  | 3165 | 3380  |
| MSTRG. 7915. 5  | coding    | 0. 465      | 417  | 3162 | 3917  |
| MSTRG. 7915. 6  | coding    | 0. 469      | 279  | 2994 | 3749  |
| MSTRG. 7915. 7  | coding    | 0. 464      | 417  | 3153 | 3913  |
| MSTRG. 7915. 9  | coding    | 0. 468      | 417  | 3123 | 3883  |
| MSTRG. 7915. 12 | coding    | 0. 457      | 396  | 1656 | 4830  |
| MSTRG. 7917. 3  | coding    | 0. 578      | 0    | 5670 | 5894  |

|                 |           |             |      |      |       |
|-----------------|-----------|-------------|------|------|-------|
| MSTRG. 7917. 4  | coding    | 0. 58       | 0    | 5493 | 5654  |
| MSTRG. 7913. 1  | noncoding | -0. 0876544 | 297  | 807  | 961   |
| MSTRG. 7910. 3  | coding    | 0. 305      | 111  | 357  | 512   |
| MSTRG. 7921. 1  | coding    | 0. 439      | 2220 | 4557 | 5063  |
| MSTRG. 7921. 2  | coding    | 0. 439      | 1815 | 4152 | 4638  |
| MSTRG. 7921. 4  | coding    | 0. 436      | 132  | 2493 | 2971  |
| MSTRG. 7923. 1  | coding    | 0. 559      | 0    | 5247 | 7122  |
| MSTRG. 7923. 2  | coding    | 0. 496      | 159  | 2793 | 4310  |
| MSTRG. 7922. 2  | coding    | 0. 241      | 0    | 924  | 1311  |
| MSTRG. 7922. 3  | coding    | 0. 235      | 0    | 651  | 1281  |
| MSTRG. 7926. 2  | noncoding | -0. 0528384 | 348  | 441  | 1027  |
| MSTRG. 7930. 1  | noncoding | -0. 012288  | 198  | 330  | 3442  |
| MSTRG. 7933. 1  | noncoding | -0. 196608  | 0    | 252  | 620   |
| MSTRG. 7933. 2  | coding    | 0. 473      | 0    | 198  | 548   |
| MSTRG. 7932. 1  | noncoding | -0. 0004096 | 0    | 0    | 250   |
| MSTRG. 7939. 1  | coding    | 0. 218      | 0    | 522  | 1196  |
| MSTRG. 7939. 2  | coding    | 0. 236      | 990  | 1374 | 5918  |
| MSTRG. 7939. 3  | coding    | 0. 244      | 675  | 1104 | 5673  |
| MSTRG. 7939. 4  | noncoding | -0. 0192512 | 1101 | 1254 | 1923  |
| MSTRG. 7935. 2  | coding    | 0. 196      | 0    | 1740 | 2398  |
| MSTRG. 7943. 1  | noncoding | -0. 0004096 | 0    | 0    | 884   |
| MSTRG. 7944. 3  | noncoding | -0. 104448  | 0    | 519  | 4570  |
| MSTRG. 7944. 4  | noncoding | -0. 104448  | 0    | 519  | 5544  |
| MSTRG. 7944. 5  | noncoding | -0. 104448  | 0    | 519  | 3951  |
| MSTRG. 7944. 6  | coding    | 0. 109      | 2904 | 3096 | 3457  |
| MSTRG. 7945. 1  | noncoding | -0. 024576  | 135  | 147  | 1819  |
| MSTRG. 7944. 7  | noncoding | -0. 0352256 | 1677 | 1797 | 2017  |
| MSTRG. 7958. 1  | noncoding | -0. 0004096 | 0    | 0    | 1215  |
| MSTRG. 7962. 1  | coding    | 0. 048      | 4482 | 4743 | 5490  |
| MSTRG. 7984. 1  | noncoding | -0. 0106496 | 771  | 1026 | 1306  |
| MSTRG. 7985. 1  | noncoding | -0. 016384  | 189  | 312  | 739   |
| MSTRG. 7990. 1  | noncoding | -0. 0004096 | 1254 | 1332 | 3483  |
| MSTRG. 7995. 1  | coding    | 0. 071      | 5154 | 5991 | 15776 |
| MSTRG. 7996. 1  | coding    | 0. 069      | 3888 | 4581 | 5064  |
| MSTRG. 7996. 2  | coding    | 0. 102      | 4032 | 4308 | 4573  |
| MSTRG. 7997. 1  | noncoding | -0. 090112  | 1530 | 1629 | 4484  |
| MSTRG. 7998. 1  | noncoding | -0. 014336  | 1677 | 1842 | 6987  |
| MSTRG. 7988. 15 | coding    | 0. 167      | 285  | 900  | 1070  |
| MSTRG. 7988. 13 | coding    | 0. 193      | 0    | 771  | 2225  |
| MSTRG. 7988. 12 | coding    | 0. 218      | 0    | 822  | 1308  |
| MSTRG. 7988. 14 | coding    | 0. 221      | 0    | 852  | 1197  |
| MSTRG. 7988. 11 | coding    | 0. 164      | 285  | 2733 | 6916  |
| MSTRG. 7988. 16 | coding    | 0. 21       | 186  | 873  | 1366  |
| MSTRG. 7988. 18 | coding    | 0. 218      | 0    | 738  | 1037  |
| MSTRG. 7988. 20 | noncoding | -0. 0024576 | 1563 | 1707 | 4479  |
| MSTRG. 7988. 22 | noncoding | -0. 0421888 | 6012 | 6396 | 7327  |
| MSTRG. 8002. 1  | noncoding | -0. 0262144 | 2259 | 2517 | 2927  |
| MSTRG. 8002. 2  | noncoding | -0. 0364544 | 5922 | 6429 | 7786  |
| MSTRG. 8016. 1  | noncoding | -0. 0069632 | 126  | 330  | 2624  |
| MSTRG. 8019. 1  | coding    | 0. 02       | 4077 | 4254 | 4512  |
| MSTRG. 8020. 1  | coding    | 0. 026      | 1029 | 3810 | 4920  |
| MSTRG. 8022. 1  | noncoding | -0. 118784  | 321  | 324  | 1025  |
| MSTRG. 8023. 1  | noncoding | -0. 02048   | 447  | 516  | 5107  |
| MSTRG. 8020. 4  | noncoding | -0. 036864  | 612  | 702  | 906   |

|               |           |            |       |       |       |
|---------------|-----------|------------|-------|-------|-------|
| MSTRG.8020.5  | noncoding | -0.131072  | 507   | 582   | 785   |
| MSTRG.8025.1  | noncoding | -0.0356352 | 4536  | 4638  | 5547  |
| MSTRG.8024.7  | noncoding | -0.0393216 | 2340  | 2532  | 2952  |
| MSTRG.8026.1  | coding    | 0.174      | 3381  | 6855  | 10249 |
| MSTRG.8027.1  | noncoding | -0.0311296 | 0     | 3     | 623   |
| MSTRG.8029.1  | coding    | 0.226      | 294   | 3279  | 3629  |
| MSTRG.8029.2  | coding    | 0.226      | 174   | 3159  | 3510  |
| MSTRG.8031.1  | noncoding | -0.0200704 | 1764  | 1923  | 4857  |
| MSTRG.8032.2  | coding    | 0.111      | 0     | 636   | 2866  |
| MSTRG.8010.1  | noncoding | -0.012288  | 0     | 60    | 214   |
| MSTRG.8060.1  | noncoding | -0.004096  | 36    | 129   | 1416  |
| MSTRG.8071.1  | noncoding | -0.110592  | 120   | 180   | 334   |
| MSTRG.8074.1  | coding    | 0.117      | 216   | 366   | 1275  |
| MSTRG.8096.1  | coding    | 0.207      | 1404  | 8904  | 11359 |
| MSTRG.8096.2  | coding    | 0.278      | 0     | 5994  | 8449  |
| MSTRG.8096.3  | coding    | 0.282      | 897   | 6366  | 8776  |
| MSTRG.8096.4  | coding    | 0.282      | 1641  | 5994  | 8403  |
| MSTRG.8096.11 | coding    | 0.284      | 1395  | 5766  | 8173  |
| MSTRG.8096.12 | coding    | 0.283      | 9942  | 15450 | 17856 |
| MSTRG.8096.6  | coding    | 0.282      | 96    | 5580  | 7988  |
| MSTRG.8096.10 | coding    | 0.282      | 1071  | 6507  | 8915  |
| MSTRG.8096.5  | coding    | 0.284      | 315   | 5817  | 8225  |
| MSTRG.8096.7  | coding    | 0.284      | 315   | 5832  | 8240  |
| MSTRG.8096.8  | coding    | 0.283      | 2076  | 7569  | 9975  |
| MSTRG.8096.9  | coding    | 0.283      | 471   | 6075  | 8481  |
| MSTRG.8096.13 | coding    | 0.276      | 0     | 3243  | 4644  |
| MSTRG.8096.14 | coding    | 0.285      | 0     | 5685  | 7085  |
| MSTRG.8097.1  | noncoding | -0.004096  | 4056  | 4146  | 5545  |
| MSTRG.8098.1  | noncoding | -0.0487424 | 3786  | 3990  | 20310 |
| MSTRG.8098.2  | noncoding | -0.004096  | 16095 | 16239 | 19103 |
| MSTRG.8099.1  | noncoding | -0.0053248 | 8073  | 8220  | 14009 |
| MSTRG.8098.3  | noncoding | -0.135168  | 2040  | 2094  | 3733  |
| MSTRG.8100.1  | noncoding | -0.0004096 | 3642  | 3840  | 24349 |
| MSTRG.8096.15 | noncoding | -0.151552  | 15612 | 15714 | 25384 |
| MSTRG.8096.16 | noncoding | -0.028672  | 11745 | 11883 | 28985 |
| MSTRG.8096.17 | noncoding | -0.028672  | 11820 | 11958 | 26229 |
| MSTRG.8096.18 | noncoding | -0.028672  | 11739 | 11877 | 26274 |
| MSTRG.8096.19 | noncoding | -0.018432  | 15912 | 16071 | 22992 |
| MSTRG.8096.20 | noncoding | -0.018432  | 12438 | 12597 | 19100 |
| MSTRG.8096.21 | noncoding | -0.045056  | 7749  | 7863  | 8019  |
| MSTRG.8096.22 | noncoding | -0.008192  | 9219  | 9450  | 12057 |
| MSTRG.8083.1  | noncoding | -0.0729088 | 126   | 402   | 3601  |
| MSTRG.8086.1  | noncoding | -0.02048   | 189   | 222   | 528   |
| MSTRG.8103.1  | coding    | 0.059      | 417   | 828   | 1426  |
| MSTRG.8109.3  | coding    | 0.115      | 0     | 1527  | 1797  |
| MSTRG.8110.2  | coding    | 0.119      | 423   | 948   | 4061  |
| MSTRG.8110.4  | coding    | 0.149      | 3108  | 3342  | 3938  |
| MSTRG.8110.6  | coding    | 0.113      | 585   | 1341  | 4454  |
| MSTRG.8110.5  | noncoding | -0.0929792 | 3108  | 3837  | 3992  |
| MSTRG.8113.1  | noncoding | -0.1056768 | 0     | 30    | 531   |
| MSTRG.8119.1  | noncoding | -0.0385024 | 1560  | 2247  | 2749  |
| MSTRG.8119.2  | noncoding | -0.0212992 | 11907 | 12111 | 18777 |
| MSTRG.8130.1  | noncoding | -0.0565248 | 279   | 1065  | 2360  |
| MSTRG.8131.3  | coding    | 0.314      | 0     | 465   | 2210  |

|               |           |            |       |       |       |
|---------------|-----------|------------|-------|-------|-------|
| MSTRG.8131.4  | coding    | 0.314      | 0     | 456   | 2491  |
| MSTRG.8131.5  | coding    | 0.067      | 429   | 1239  | 2067  |
| MSTRG.8131.6  | coding    | 0.067      | 429   | 1284  | 2026  |
| MSTRG.8131.7  | coding    | 0.052      | 87    | 924   | 1666  |
| MSTRG.8117.3  | coding    | 0.236      | 102   | 1200  | 1787  |
| MSTRG.8143.1  | coding    | 0.099      | 111   | 1122  | 1396  |
| MSTRG.8145.1  | noncoding | -0.0847872 | 66    | 87    | 792   |
| MSTRG.8146.1  | noncoding | -0.0090112 | 183   | 213   | 370   |
| MSTRG.8147.2  | coding    | 0.063      | 540   | 1158  | 1725  |
| MSTRG.8160.2  | noncoding | -0.0077824 | 27    | 105   | 260   |
| MSTRG.8160.1  | noncoding | -0.0483328 | 2649  | 2871  | 13637 |
| MSTRG.8160.3  | noncoding | -0.0180224 | 930   | 969   | 2629  |
| MSTRG.8160.4  | noncoding | -0.0483328 | 2505  | 2727  | 12349 |
| MSTRG.8165.1  | coding    | 0.066      | 0     | 7938  | 8216  |
| MSTRG.8165.3  | coding    | 0.07       | 0     | 7647  | 7947  |
| MSTRG.8171.1  | noncoding | -0.0004096 | 0     | 0     | 352   |
| MSTRG.8171.2  | noncoding | -0.1859584 | 0     | 42    | 475   |
| MSTRG.8172.11 | noncoding | -0.0172032 | 2736  | 2874  | 4324  |
| MSTRG.8172.7  | noncoding | -0.0098304 | 471   | 582   | 1350  |
| MSTRG.8172.6  | noncoding | -0.0053248 | 633   | 777   | 2336  |
| MSTRG.8172.9  | noncoding | -0.0053248 | 120   | 264   | 1821  |
| MSTRG.8172.10 | noncoding | -0.0053248 | 804   | 948   | 2532  |
| MSTRG.8172.5  | noncoding | -0.0098304 | 471   | 582   | 2168  |
| MSTRG.8172.8  | coding    | 0.104      | 9513  | 9735  | 15150 |
| MSTRG.8172.4  | noncoding | -0.0053248 | 114   | 258   | 1847  |
| MSTRG.8172.3  | coding    | 0.217      | 0     | 192   | 2474  |
| MSTRG.8172.13 | noncoding | -0.032768  | 87    | 192   | 2683  |
| MSTRG.8172.12 | noncoding | -0.0053248 | 10398 | 10542 | 11308 |
| MSTRG.8172.14 | noncoding | -0.012288  | 2403  | 2553  | 4432  |
| MSTRG.8172.15 | noncoding | -0.086016  | 6318  | 6426  | 7152  |
| MSTRG.8185.2  | noncoding | -0.0004096 | 2067  | 2166  | 2412  |
| MSTRG.8185.1  | noncoding | -0.0503808 | 1113  | 1431  | 4507  |
| MSTRG.8185.3  | noncoding | -0.02048   | 468   | 507   | 1764  |
| MSTRG.8195.1  | coding    | 0.282      | 0     | 3633  | 4468  |
| MSTRG.8195.2  | coding    | 0.271      | 177   | 3966  | 4620  |
| MSTRG.8190.2  | noncoding | -0.0004096 | 0     | 0     | 488   |
| MSTRG.8198.1  | noncoding | -0.0004096 | 0     | 0     | 382   |
| MSTRG.8201.1  | noncoding | -0.0311296 | 174   | 324   | 3043  |
| MSTRG.8201.2  | noncoding | -0.016384  | 114   | 216   | 6363  |
| MSTRG.8202.1  | noncoding | -0.045056  | 1458  | 1575  | 5647  |
| MSTRG.8200.2  | coding    | 0.127      | 1011  | 2244  | 4812  |
| MSTRG.8200.3  | noncoding | -0.1245184 | 1716  | 1734  | 1942  |
| MSTRG.8203.1  | noncoding | -0.106496  | 96    | 117   | 278   |
| MSTRG.8209.1  | noncoding | -0.0466944 | 828   | 1041  | 2319  |
| MSTRG.8209.2  | noncoding | -0.0434176 | 186   | 192   | 746   |
| MSTRG.8210.1  | noncoding | -0.1847296 | 0     | 21    | 324   |
| MSTRG.8218.1  | coding    | 0.162      | 39    | 2247  | 3615  |
| MSTRG.8219.1  | noncoding | -0.06144   | 93    | 186   | 341   |
| MSTRG.8224.3  | coding    | 0.086      | 420   | 678   | 1400  |
| MSTRG.8221.1  | noncoding | -0.0249856 | 84    | 99    | 372   |
| MSTRG.8221.2  | noncoding | -0.0274432 | 0     | 117   | 388   |
| MSTRG.8238.1  | coding    | 0.082      | 375   | 624   | 1860  |
| MSTRG.8238.2  | coding    | 0.082      | 960   | 1209  | 2445  |
| MSTRG.8238.5  | coding    | 0.076      | 0     | 471   | 1707  |

|                 |           |             |       |       |       |
|-----------------|-----------|-------------|-------|-------|-------|
| MSTRG. 8238. 6  | coding    | 0. 082      | 870   | 1119  | 2354  |
| MSTRG. 8238. 7  | coding    | 0. 082      | 567   | 816   | 2052  |
| MSTRG. 8238. 8  | coding    | 0. 082      | 900   | 1149  | 2385  |
| MSTRG. 8239. 1  | noncoding | -0. 02048   | 4131  | 4242  | 9995  |
| MSTRG. 8241. 3  | noncoding | -0. 1417216 | 0     | 261   | 10966 |
| MSTRG. 8241. 2  | noncoding | -0. 0454656 | 0     | 792   | 3177  |
| MSTRG. 8241. 4  | coding    | 0. 148      | 0     | 984   | 1305  |
| MSTRG. 8242. 1  | noncoding | -0. 022528  | 17562 | 17847 | 43372 |
| MSTRG. 8241. 5  | coding    | 0. 15       | 1377  | 2121  | 2442  |
| MSTRG. 8241. 6  | coding    | 0. 136      | 219   | 1104  | 1426  |
| MSTRG. 8244. 1  | noncoding | -0. 038912  | 420   | 540   | 828   |
| MSTRG. 8241. 7  | coding    | 0. 158      | 294   | 984   | 1306  |
| MSTRG. 8241. 8  | coding    | 0. 186      | 1806  | 2160  | 2481  |
| MSTRG. 8246. 2  | coding    | 0. 105      | 126   | 336   | 933   |
| MSTRG. 8246. 6  | noncoding | -0. 065536  | 711   | 801   | 1398  |
| MSTRG. 8246. 5  | coding    | 0. 072      | 57    | 1182  | 1778  |
| MSTRG. 8246. 4  | coding    | 0. 072      | 138   | 1266  | 1863  |
| MSTRG. 8248. 1  | noncoding | -0. 057344  | 1287  | 1374  | 3355  |
| MSTRG. 8246. 7  | noncoding | -0. 004096  | 1494  | 1569  | 1949  |
| MSTRG. 8249. 1  | noncoding | -0. 0008192 | 93    | 216   | 1079  |
| MSTRG. 8255. 1  | noncoding | -0. 0106496 | 0     | 54    | 281   |
| MSTRG. 8283. 3  | coding    | 0. 099      | 429   | 2019  | 4924  |
| MSTRG. 8283. 5  | coding    | 0. 099      | 507   | 2097  | 4455  |
| MSTRG. 8283. 6  | coding    | 0. 099      | 231   | 1821  | 4156  |
| MSTRG. 8283. 7  | coding    | 0. 1        | 3141  | 4503  | 4771  |
| MSTRG. 8283. 8  | noncoding | -0. 0483328 | 231   | 402   | 662   |
| MSTRG. 8283. 9  | noncoding | -0. 0483328 | 228   | 399   | 5221  |
| MSTRG. 8283. 10 | noncoding | -0. 0700416 | 162   | 465   | 3112  |
| MSTRG. 8283. 12 | noncoding | -0. 028672  | 9339  | 9435  | 17695 |
| MSTRG. 8283. 13 | noncoding | -0. 006144  | 6852  | 7002  | 11259 |
| MSTRG. 8285. 3  | coding    | 0. 071      | 1389  | 3681  | 5948  |
| MSTRG. 8395. 1  | noncoding | -0. 0004096 | 0     | 0     | 231   |
| MSTRG. 8397. 1  | noncoding | -0. 016384  | 309   | 387   | 649   |
| MSTRG. 8409. 1  | noncoding | -0. 151552  | 5241  | 5331  | 6064  |
| MSTRG. 8410. 1  | noncoding | -0. 1024    | 846   | 876   | 1072  |
| MSTRG. 8411. 1  | coding    | 0. 062      | 4869  | 5094  | 7198  |
| MSTRG. 8412. 1  | noncoding | -0. 057344  | 1146  | 1191  | 1995  |
| MSTRG. 8417. 2  | noncoding | -0. 069632  | 2028  | 2079  | 3330  |
| MSTRG. 8419. 1  | noncoding | -0. 065536  | 678   | 702   | 2285  |
| MSTRG. 8394. 2  | noncoding | -0. 0557056 | 402   | 585   | 6244  |
| MSTRG. 8394. 3  | coding    | 0. 136      | 84    | 243   | 644   |
| MSTRG. 8420. 1  | noncoding | -0. 0036864 | 1647  | 1794  | 7284  |
| MSTRG. 8422. 1  | noncoding | -0. 032768  | 12    | 87    | 2437  |
| MSTRG. 8423. 1  | noncoding | -0. 02048   | 930   | 936   | 1181  |
| MSTRG. 8424. 1  | coding    | 0. 147      | 2574  | 2847  | 9786  |
| MSTRG. 8425. 1  | noncoding | -0. 016384  | 1056  | 1140  | 2449  |
| MSTRG. 8394. 4  | noncoding | -0. 02048   | 126   | 186   | 1662  |
| MSTRG. 8394. 5  | noncoding | -0. 0180224 | 4962  | 5073  | 5581  |
| MSTRG. 8394. 6  | noncoding | -0. 0049152 | 11028 | 11196 | 17583 |
| MSTRG. 8394. 7  | noncoding | -0. 032768  | 462   | 489   | 2977  |
| MSTRG. 8394. 8  | noncoding | -0. 0262144 | 0     | 90    | 1181  |
| MSTRG. 8394. 9  | noncoding | -0. 0241664 | 1305  | 1404  | 3858  |
| MSTRG. 8282. 1  | noncoding | -0. 0004096 | 0     | 0     | 216   |
| MSTRG. 8309. 1  | coding    | 0. 063      | 1866  | 2523  | 3274  |

|               |           |            |      |      |       |
|---------------|-----------|------------|------|------|-------|
| MSTRG.8315.1  | noncoding | -0.012288  | 195  | 321  | 613   |
| MSTRG.8316.1  | noncoding | -0.073728  | 156  | 222  | 1918  |
| MSTRG.8315.2  | noncoding | -0.0626688 | 3414 | 3936 | 14760 |
| MSTRG.8324.3  | noncoding | -0.0294912 | 225  | 423  | 733   |
| MSTRG.8324.4  | noncoding | -0.0253952 | 84   | 279  | 591   |
| MSTRG.8333.2  | coding    | 0.229      | 180  | 675  | 1633  |
| MSTRG.8333.3  | coding    | 0.093      | 2784 | 3234 | 5997  |
| MSTRG.8333.4  | coding    | 0.23       | 180  | 654  | 6342  |
| MSTRG.8333.5  | coding    | 0.108      | 2499 | 2937 | 6861  |
| MSTRG.8337.1  | coding    | 0.1        | 159  | 309  | 462   |
| MSTRG.8338.2  | coding    | 0.455      | 0    | 633  | 1279  |
| MSTRG.8346.2  | coding    | 0.283      | 366  | 1518 | 2267  |
| MSTRG.8349.6  | coding    | 0.062      | 162  | 522  | 6783  |
| MSTRG.8351.1  | noncoding | -0.0004096 | 342  | 606  | 848   |
| MSTRG.8351.5  | noncoding | -0.06144   | 2946 | 3027 | 6597  |
| MSTRG.8352.3  | coding    | 0.082      | 0    | 2736 | 2983  |
| MSTRG.8352.4  | coding    | 0.086      | 216  | 1029 | 1266  |
| MSTRG.8353.1  | coding    | 0.039      | 174  | 585  | 8096  |
| MSTRG.8353.2  | coding    | 0.069      | 0    | 747  | 9030  |
| MSTRG.8353.4  | coding    | 0.041      | 5553 | 5796 | 9057  |
| MSTRG.8353.6  | coding    | 0.041      | 5442 | 5685 | 8424  |
| MSTRG.8353.5  | noncoding | -0.0618496 | 0    | 189  | 4570  |
| MSTRG.8353.7  | noncoding | -0.0618496 | 0    | 189  | 2534  |
| MSTRG.8353.8  | coding    | 0.078      | 0    | 474  | 2467  |
| MSTRG.8354.1  | noncoding | -0.0090112 | 1755 | 1962 | 3323  |
| MSTRG.8355.1  | coding    | 0.06       | 108  | 279  | 1092  |
| MSTRG.8356.1  | noncoding | -0.0413696 | 1662 | 1695 | 2103  |
| MSTRG.8340.1  | noncoding | -0.311296  | 171  | 207  | 985   |
| MSTRG.8343.1  | noncoding | -0.0851968 | 36   | 45   | 271   |
| MSTRG.8359.5  | coding    | 0.118      | 540  | 831  | 1147  |
| MSTRG.8359.3  | coding    | 0.118      | 2826 | 3117 | 3819  |
| MSTRG.8359.4  | coding    | 0.118      | 552  | 843  | 1708  |
| MSTRG.8360.1  | noncoding | -0.12288   | 123  | 138  | 337   |
| MSTRG.8365.1  | noncoding | -0.135168  | 1575 | 1632 | 3590  |
| MSTRG.8358.1  | noncoding | -0.090112  | 372  | 399  | 638   |
| MSTRG.8386.1  | coding    | 0.156      | 585  | 3900 | 4416  |
| MSTRG.8387.1  | noncoding | -0.024576  | 81   | 192  | 455   |
| MSTRG.8392.1  | noncoding | -0.0155648 | 81   | 144  | 714   |
| MSTRG.8432.1  | noncoding | -0.008192  | 3492 | 3633 | 12798 |
| MSTRG.8430.1  | noncoding | -0.151552  | 162  | 186  | 879   |
| MSTRG.8444.1  | coding    | 0.036      | 0    | 1269 | 3691  |
| MSTRG.8444.2  | coding    | 0.02       | 78   | 1311 | 1883  |
| MSTRG.8444.3  | coding    | 0.067      | 6    | 543  | 2364  |
| MSTRG.8444.7  | coding    | 0.361      | 15   | 399  | 2536  |
| MSTRG.8444.5  | coding    | 0.124      | 15   | 1437 | 3291  |
| MSTRG.8444.6  | coding    | 0.124      | 15   | 1437 | 2538  |
| MSTRG.8444.8  | coding    | 0.023      | 150  | 1368 | 2745  |
| MSTRG.8444.9  | coding    | 0.023      | 186  | 1404 | 3256  |
| MSTRG.8444.10 | coding    | 0.023      | 177  | 1395 | 2509  |
| MSTRG.8444.11 | coding    | 0.023      | 165  | 1383 | 2482  |
| MSTRG.8445.1  | coding    | 0.036      | 288  | 2961 | 3167  |
| MSTRG.8445.3  | coding    | 0.122      | 1389 | 1884 | 2091  |
| MSTRG.8437.1  | coding    | 0.337      | 207  | 2313 | 4008  |
| MSTRG.8439.2  | coding    | 0.349      | 0    | 183  | 1096  |

|                 |           |             |      |      |       |
|-----------------|-----------|-------------|------|------|-------|
| MSTRG. 8446. 5  | coding    | 0. 084      | 1389 | 2469 | 2670  |
| MSTRG. 8446. 7  | coding    | 0. 084      | 213  | 1293 | 1494  |
| MSTRG. 8460. 1  | noncoding | -0. 0004096 | 6    | 6    | 235   |
| MSTRG. 8482. 1  | coding    | 0. 077      | 1815 | 2766 | 2937  |
| MSTRG. 8486. 1  | noncoding | -0. 02048   | 426  | 549  | 733   |
| MSTRG. 8488. 1  | noncoding | -0. 0323584 | 264  | 324  | 480   |
| MSTRG. 8488. 2  | noncoding | -0. 0036864 | 135  | 174  | 615   |
| MSTRG. 8488. 3  | noncoding | -0. 0036864 | 135  | 174  | 941   |
| MSTRG. 8488. 4  | noncoding | -0. 047104  | 303  | 393  | 548   |
| MSTRG. 8495. 1  | noncoding | -0. 0159744 | 183  | 330  | 762   |
| MSTRG. 8494. 5  | coding    | 0. 26       | 0    | 2898 | 3154  |
| MSTRG. 8493. 1  | noncoding | -0. 0008192 | 45   | 69   | 225   |
| MSTRG. 8499. 1  | coding    | 0. 245      | 0    | 1176 | 4661  |
| MSTRG. 8506. 1  | coding    | 0. 245      | 0    | 1659 | 11951 |
| MSTRG. 8507. 1  | noncoding | -0. 0016384 | 156  | 231  | 1901  |
| MSTRG. 8508. 1  | noncoding | -0. 0507904 | 1215 | 1476 | 3036  |
| MSTRG. 8509. 1  | noncoding | -0. 0004096 | 1122 | 1188 | 1725  |
| MSTRG. 8512. 2  | noncoding | -0. 1101824 | 0    | 270  | 3617  |
| MSTRG. 8512. 3  | noncoding | -0. 1101824 | 0    | 270  | 3716  |
| MSTRG. 8512. 4  | coding    | 0. 036      | 0    | 1881 | 3114  |
| MSTRG. 8502. 3  | coding    | 0. 116      | 4020 | 7008 | 8455  |
| MSTRG. 8515. 3  | coding    | 0. 138      | 426  | 957  | 1838  |
| MSTRG. 8517. 2  | coding    | 0. 115      | 309  | 921  | 1264  |
| MSTRG. 8520. 1  | noncoding | -0. 0270336 | 1686 | 1884 | 2123  |
| MSTRG. 8521. 1  | noncoding | -0. 065536  | 753  | 825  | 1719  |
| MSTRG. 8522. 1  | noncoding | -0. 02048   | 42   | 99   | 500   |
| MSTRG. 8524. 1  | noncoding | -0. 0151552 | 2031 | 2193 | 3197  |
| MSTRG. 8526. 2  | coding    | 0. 04       | 2427 | 5856 | 8650  |
| MSTRG. 8527. 1  | coding    | 0. 128      | 2610 | 2907 | 5316  |
| MSTRG. 8526. 3  | noncoding | -0. 100352  | 0    | 504  | 1140  |
| MSTRG. 8528. 1  | noncoding | -0. 086016  | 117  | 138  | 959   |
| MSTRG. 8529. 1  | coding    | 0. 084      | 4443 | 5718 | 7129  |
| MSTRG. 8529. 2  | coding    | 0. 084      | 4578 | 5853 | 7231  |
| MSTRG. 8529. 3  | coding    | 0. 084      | 4407 | 5682 | 7061  |
| MSTRG. 8529. 4  | coding    | 0. 084      | 4425 | 5700 | 11546 |
| MSTRG. 8529. 5  | coding    | 0. 084      | 4467 | 5742 | 6557  |
| MSTRG. 8529. 7  | coding    | 0. 084      | 4236 | 5511 | 6889  |
| MSTRG. 8534. 9  | coding    | 0. 639      | 438  | 2049 | 4551  |
| MSTRG. 8534. 10 | coding    | 0. 574      | 918  | 2736 | 5129  |
| MSTRG. 8534. 11 | coding    | 0. 575      | 693  | 2508 | 2801  |
| MSTRG. 8536. 1  | noncoding | -0. 036864  | 1272 | 1365 | 13322 |
| MSTRG. 8536. 2  | noncoding | -0. 036864  | 624  | 717  | 4170  |
| MSTRG. 8538. 5  | coding    | 0. 135      | 0    | 717  | 2111  |
| MSTRG. 8539. 3  | coding    | 0. 322      | 270  | 2382 | 5492  |
| MSTRG. 8539. 4  | coding    | 0. 322      | 348  | 2460 | 5570  |
| MSTRG. 8539. 5  | coding    | 0. 313      | 276  | 2451 | 3609  |
| MSTRG. 8543. 1  | noncoding | -0. 094208  | 444  | 531  | 705   |
| MSTRG. 8544. 1  | noncoding | -0. 0004096 | 540  | 627  | 841   |
| MSTRG. 8542. 2  | noncoding | -0. 008192  | 111  | 132  | 3250  |
| MSTRG. 8547. 1  | noncoding | -0. 0479232 | 381  | 450  | 1638  |
| MSTRG. 8548. 3  | noncoding | -0. 0876544 | 0    | 1476 | 5560  |
| MSTRG. 8548. 2  | coding    | 0. 331      | 0    | 1287 | 5371  |
| MSTRG. 8556. 1  | noncoding | -0. 016384  | 108  | 180  | 335   |
| MSTRG. 8557. 3  | coding    | 0. 072      | 564  | 2199 | 6111  |

|                 |           |             |      |      |       |
|-----------------|-----------|-------------|------|------|-------|
| MSTRG. 8557. 2  | coding    | 0. 081      | 6297 | 8673 | 12584 |
| MSTRG. 8557. 5  | coding    | 0. 095      | 6150 | 7767 | 8576  |
| MSTRG. 8554. 1  | noncoding | -0. 0598016 | 0    | 81   | 633   |
| MSTRG. 8555. 1  | noncoding | -0. 0131072 | 201  | 243  | 786   |
| MSTRG. 8565. 1  | noncoding | -0. 0167936 | 306  | 453  | 1716  |
| MSTRG. 8565. 2  | noncoding | -0. 049152  | 519  | 606  | 1010  |
| MSTRG. 8566. 1  | noncoding | -0. 0004096 | 60   | 150  | 464   |
| MSTRG. 8566. 2  | noncoding | -0. 045056  | 60   | 96   | 296   |
| MSTRG. 8585. 1  | noncoding | -0. 0008192 | 0    | 63   | 300   |
| MSTRG. 8587. 1  | noncoding | -0. 0004096 | 0    | 0    | 356   |
| MSTRG. 8589. 1  | noncoding | -0. 02048   | 846  | 975  | 2917  |
| MSTRG. 8586. 1  | noncoding | -0. 0315392 | 285  | 411  | 567   |
| MSTRG. 8591. 2  | coding    | 0. 01       | 33   | 525  | 2986  |
| MSTRG. 8594. 2  | coding    | 0. 161      | 465  | 4302 | 5679  |
| MSTRG. 8595. 1  | noncoding | -0. 0004096 | 0    | 0    | 322   |
| MSTRG. 8598. 3  | coding    | 0. 197      | 0    | 411  | 3546  |
| MSTRG. 8598. 4  | coding    | 0. 196      | 0    | 414  | 3549  |
| MSTRG. 8600. 3  | noncoding | -0. 0352256 | 2931 | 3510 | 6484  |
| MSTRG. 8601. 1  | noncoding | -0. 073728  | 171  | 255  | 924   |
| MSTRG. 8604. 1  | noncoding | -0. 094208  | 111  | 555  | 1159  |
| MSTRG. 8604. 2  | noncoding | -0. 1200128 | 0    | 246  | 847   |
| MSTRG. 8605. 4  | noncoding | -0. 086016  | 0    | 102  | 1167  |
| MSTRG. 8605. 8  | noncoding | -0. 036864  | 660  | 807  | 971   |
| MSTRG. 8605. 5  | noncoding | -0. 036864  | 1173 | 1320 | 1483  |
| MSTRG. 8605. 6  | noncoding | -0. 0094208 | 1698 | 1926 | 4345  |
| MSTRG. 8606. 3  | coding    | 0. 134      | 0    | 468  | 4280  |
| MSTRG. 8606. 5  | coding    | 0. 009      | 6    | 423  | 4198  |
| MSTRG. 8606. 4  | coding    | 0. 021      | 6    | 438  | 4249  |
| MSTRG. 8608. 1  | noncoding | -0. 032768  | 36   | 216  | 7482  |
| MSTRG. 8611. 3  | coding    | 0. 261      | 0    | 1419 | 1859  |
| MSTRG. 8613. 1  | noncoding | -0. 14336   | 378  | 408  | 593   |
| MSTRG. 8617. 1  | noncoding | -0. 0466944 | 15   | 249  | 3792  |
| MSTRG. 8614. 2  | coding    | 0. 385      | 633  | 1143 | 2232  |
| MSTRG. 8614. 3  | coding    | 0. 382      | 546  | 1053 | 1422  |
| MSTRG. 8624. 10 | coding    | 0. 122      | 63   | 1716 | 4645  |
| MSTRG. 8624. 11 | coding    | 0. 113      | 63   | 1698 | 4728  |
| MSTRG. 8624. 12 | coding    | 0. 113      | 63   | 1698 | 4684  |
| MSTRG. 8624. 13 | coding    | 0. 117      | 63   | 1740 | 4726  |
| MSTRG. 8620. 1  | noncoding | -0. 069632  | 246  | 249  | 413   |
| MSTRG. 8629. 1  | noncoding | -0. 012288  | 261  | 357  | 902   |
| MSTRG. 8630. 1  | coding    | 0. 084      | 843  | 1083 | 1943  |
| MSTRG. 8630. 2  | noncoding | -0. 008192  | 249  | 453  | 3983  |
| MSTRG. 8632. 1  | noncoding | -0. 0004096 | 0    | 0    | 420   |
| MSTRG. 8645. 5  | noncoding | -0. 0999424 | 615  | 900  | 3214  |
| MSTRG. 8645. 4  | noncoding | -0. 0999424 | 615  | 900  | 3497  |
| MSTRG. 8645. 6  | coding    | 0. 244      | 492  | 777  | 3949  |
| MSTRG. 8646. 1  | noncoding | -0. 0458752 | 216  | 243  | 1103  |
| MSTRG. 8642. 2  | coding    | 0. 251      | 0    | 213  | 760   |
| MSTRG. 8647. 1  | coding    | 0. 127      | 168  | 2664 | 7171  |
| MSTRG. 8647. 3  | coding    | 0. 127      | 159  | 2655 | 3307  |
| MSTRG. 8648. 1  | coding    | 0. 082      | 222  | 1755 | 5178  |
| MSTRG. 8650. 2  | coding    | 0. 347      | 429  | 4251 | 5011  |
| MSTRG. 8650. 1  | coding    | 0. 321      | 0    | 4362 | 6989  |
| MSTRG. 8650. 4  | noncoding | -0. 0159744 | 378  | 381  | 652   |



|                 |           |             |      |      |       |
|-----------------|-----------|-------------|------|------|-------|
| MSTRG. 8650. 3  | coding    | 0. 34       | 105  | 4134 | 6532  |
| MSTRG. 8656. 3  | coding    | 0. 055      | 807  | 1185 | 3794  |
| MSTRG. 8657. 1  | coding    | 0. 053      | 879  | 2508 | 5607  |
| MSTRG. 8657. 2  | coding    | 0. 053      | 456  | 2085 | 3486  |
| MSTRG. 8658. 1  | coding    | 0. 066      | 7272 | 8244 | 9642  |
| MSTRG. 8658. 3  | coding    | 0. 066      | 2304 | 3276 | 5900  |
| MSTRG. 8657. 3  | coding    | 0. 053      | 573  | 2202 | 5300  |
| MSTRG. 8657. 4  | coding    | 0. 054      | 573  | 2046 | 5144  |
| MSTRG. 8657. 6  | noncoding | -0. 07168   | 4605 | 4851 | 5546  |
| MSTRG. 8657. 7  | noncoding | -0. 0651264 | 1968 | 2220 | 2714  |
| MSTRG. 8659. 2  | noncoding | -0. 0192512 | 564  | 606  | 1058  |
| MSTRG. 8660. 2  | coding    | 0. 146      | 627  | 2433 | 4024  |
| MSTRG. 8660. 3  | coding    | 0. 152      | 495  | 2352 | 3942  |
| MSTRG. 8660. 4  | coding    | 0. 147      | 915  | 2718 | 4308  |
| MSTRG. 8660. 10 | coding    | 0. 159      | 405  | 1449 | 5145  |
| MSTRG. 8660. 11 | coding    | 0. 151      | 33   | 1917 | 3501  |
| MSTRG. 8660. 8  | coding    | 0. 148      | 270  | 2040 | 3590  |
| MSTRG. 8660. 9  | coding    | 0. 141      | 405  | 2124 | 3672  |
| MSTRG. 8652. 1  | coding    | 0. 14       | 471  | 1620 | 2233  |
| MSTRG. 8652. 2  | coding    | 0. 359      | 111  | 540  | 1883  |
| MSTRG. 8674. 2  | coding    | 0. 192      | 1311 | 4266 | 5024  |
| MSTRG. 8674. 1  | coding    | 0. 187      | 0    | 3171 | 6975  |
| MSTRG. 8674. 3  | coding    | 0. 183      | 1239 | 4155 | 7957  |
| MSTRG. 8674. 4  | coding    | 0. 191      | 0    | 3165 | 6969  |
| MSTRG. 8674. 8  | coding    | 0. 262      | 108  | 1488 | 2152  |
| MSTRG. 8674. 7  | coding    | 0. 183      | 1716 | 4632 | 6522  |
| MSTRG. 8677. 5  | noncoding | -0. 0987136 | 0    | 111  | 628   |
| MSTRG. 8677. 3  | coding    | 0. 217      | 0    | 123  | 751   |
| MSTRG. 8677. 4  | noncoding | -0. 02048   | 0    | 6    | 457   |
| MSTRG. 8677. 8  | coding    | 0. 21       | 0    | 135  | 809   |
| MSTRG. 8677. 9  | coding    | 0. 208      | 0    | 138  | 812   |
| MSTRG. 8677. 10 | coding    | 0. 213      | 0    | 132  | 653   |
| MSTRG. 8678. 2  | coding    | 0. 4        | 30   | 1233 | 2276  |
| MSTRG. 8680. 3  | coding    | 0. 07       | 0    | 1797 | 3626  |
| MSTRG. 8680. 2  | coding    | 0. 08       | 0    | 3348 | 3654  |
| MSTRG. 8686. 1  | noncoding | -0. 0004096 | 0    | 0    | 321   |
| MSTRG. 8701. 1  | coding    | 0. 14       | 189  | 3975 | 10370 |
| MSTRG. 8701. 2  | coding    | 0. 139      | 159  | 3984 | 11309 |
| MSTRG. 8716. 1  | coding    | 0. 135      | 501  | 2139 | 2466  |
| MSTRG. 8713. 1  | noncoding | -0. 0110592 | 0    | 27   | 233   |
| MSTRG. 8732. 1  | noncoding | -0. 0745472 | 2235 | 2295 | 2657  |
| MSTRG. 8733. 1  | noncoding | -0. 0004096 | 0    | 0    | 511   |
| MSTRG. 8733. 2  | coding    | 0. 171      | 474  | 831  | 2303  |
| MSTRG. 8733. 3  | coding    | 0. 075      | 450  | 657  | 2130  |
| MSTRG. 8734. 1  | coding    | 0. 118      | 2256 | 2646 | 3940  |
| MSTRG. 8729. 1  | coding    | 0. 146      | 0    | 348  | 635   |
| MSTRG. 8742. 1  | coding    | 0. 259      | 0    | 1059 | 3023  |
| MSTRG. 8742. 3  | coding    | 0. 135      | 180  | 2406 | 2660  |
| MSTRG. 8742. 6  | coding    | 0. 265      | 69   | 1239 | 4582  |
| MSTRG. 8742. 7  | coding    | 0. 31       | 69   | 1053 | 4528  |
| MSTRG. 8742. 8  | coding    | 0. 243      | 528  | 1569 | 3534  |
| MSTRG. 8742. 9  | coding    | 0. 29       | 528  | 1383 | 3480  |
| MSTRG. 8764. 1  | noncoding | -0. 077824  | 213  | 273  | 1789  |
| MSTRG. 8765. 1  | coding    | 0. 128      | 1275 | 1608 | 5157  |

|                 |           |             |       |       |       |
|-----------------|-----------|-------------|-------|-------|-------|
| MSTRG. 8765. 2  | coding    | 0. 128      | 15243 | 15576 | 17517 |
| MSTRG. 8766. 1  | noncoding | -0. 004096  | 3714  | 3831  | 6057  |
| MSTRG. 8765. 4  | noncoding | -0. 0049152 | 675   | 903   | 1299  |
| MSTRG. 8748. 4  | coding    | 0. 256      | 612   | 2331  | 3499  |
| MSTRG. 8748. 6  | coding    | 0. 25       | 612   | 2208  | 5390  |
| MSTRG. 8768. 3  | coding    | 0. 186      | 0     | 417   | 2314  |
| MSTRG. 8769. 1  | coding    | 0. 147      | 0     | 801   | 6751  |
| MSTRG. 8785. 1  | coding    | 0. 262      | 0     | 318   | 2739  |
| MSTRG. 8785. 2  | coding    | 0. 171      | 0     | 930   | 2575  |
| MSTRG. 8785. 3  | coding    | 0. 309      | 0     | 387   | 2210  |
| MSTRG. 8786. 7  | coding    | 0. 073      | 1770  | 6096  | 9533  |
| MSTRG. 8786. 13 | coding    | 0. 096      | 3111  | 8190  | 11629 |
| MSTRG. 8786. 8  | coding    | 0. 077      | 6003  | 10332 | 13769 |
| MSTRG. 8786. 12 | coding    | 0. 131      | 0     | 4500  | 7937  |
| MSTRG. 8786. 10 | coding    | 0. 124      | 168   | 5673  | 9110  |
| MSTRG. 8786. 11 | coding    | 0. 136      | 174   | 4578  | 9067  |
| MSTRG. 8786. 9  | coding    | 0. 11       | 78    | 5328  | 8765  |
| MSTRG. 8786. 15 | noncoding | -0. 086016  | 3513  | 3636  | 6405  |
| MSTRG. 8787. 1  | noncoding | -0. 096256  | 0     | 561   | 11769 |
| MSTRG. 8789. 1  | coding    | 0. 102      | 246   | 981   | 1276  |
| MSTRG. 8803. 1  | coding    | 0. 099      | 678   | 915   | 3921  |
| MSTRG. 8808. 2  | coding    | 0. 06       | 2982  | 4569  | 6778  |
| MSTRG. 8809. 1  | coding    | 0. 149      | 0     | 1431  | 1730  |
| MSTRG. 8809. 4  | coding    | 0. 176      | 423   | 1551  | 3609  |
| MSTRG. 8818. 3  | coding    | 0. 139      | 438   | 1353  | 1669  |
| MSTRG. 8815. 1  | noncoding | -0. 004096  | 84    | 279   | 494   |
| MSTRG. 8815. 2  | noncoding | -0. 008192  | 258   | 465   | 679   |
| MSTRG. 8815. 3  | noncoding | -0. 0036864 | 258   | 480   | 694   |
| MSTRG. 8815. 4  | noncoding | -0. 002048  | 84    | 264   | 418   |
| MSTRG. 8825. 6  | coding    | 0. 258      | 474   | 3015  | 3552  |
| MSTRG. 8825. 7  | coding    | 0. 307      | 1245  | 3066  | 3256  |
| MSTRG. 8825. 8  | coding    | 0. 104      | 474   | 1182  | 2210  |
| MSTRG. 8826. 4  | coding    | 0. 321      | 0     | 5598  | 5986  |
| MSTRG. 8823. 1  | noncoding | -0. 0425984 | 237   | 537   | 1111  |
| MSTRG. 8833. 1  | noncoding | -0. 053248  | 282   | 507   | 1772  |
| MSTRG. 8833. 2  | coding    | 0. 089      | 579   | 1578  | 2463  |
| MSTRG. 8833. 3  | noncoding | -0. 053248  | 282   | 507   | 2047  |
| MSTRG. 8833. 4  | coding    | 0. 089      | 579   | 1578  | 2389  |
| MSTRG. 8833. 5  | coding    | 0. 089      | 579   | 1578  | 3484  |
| MSTRG. 8833. 6  | coding    | 0. 089      | 579   | 1578  | 4438  |
| MSTRG. 8833. 7  | noncoding | -0. 053248  | 282   | 507   | 4886  |
| MSTRG. 8833. 8  | coding    | 0. 089      | 450   | 1449  | 4451  |
| MSTRG. 8830. 1  | noncoding | -0. 0610304 | 123   | 387   | 541   |
| MSTRG. 8835. 1  | noncoding | -0. 043008  | 600   | 717   | 2581  |
| MSTRG. 8836. 1  | noncoding | -0. 0237568 | 0     | 183   | 2358  |
| MSTRG. 8838. 1  | coding    | 0. 042      | 579   | 1341  | 2220  |
| MSTRG. 8839. 1  | coding    | 0. 076      | 108   | 834   | 1116  |
| MSTRG. 8842. 1  | coding    | 0. 408      | 0     | 1125  | 1350  |
| MSTRG. 8846. 3  | coding    | 0. 245      | 0     | 3351  | 4404  |
| MSTRG. 8846. 4  | coding    | 0. 237      | 0     | 3147  | 4204  |
| MSTRG. 8846. 5  | coding    | 0. 237      | 0     | 3147  | 7556  |
| MSTRG. 8846. 6  | coding    | 0. 246      | 0     | 3036  | 7445  |
| MSTRG. 8849. 1  | noncoding | -0. 548864  | 225   | 231   | 602   |
| MSTRG. 8844. 1  | coding    | 0. 376      | 0     | 606   | 960   |

|                 |           |             |       |       |       |
|-----------------|-----------|-------------|-------|-------|-------|
| MSTRG. 8844. 2  | coding    | 0. 376      | 0     | 606   | 1384  |
| MSTRG. 8853. 1  | noncoding | -0. 012288  | 318   | 336   | 491   |
| MSTRG. 8853. 2  | noncoding | -0. 045056  | 12    | 24    | 422   |
| MSTRG. 8853. 3  | noncoding | -0. 024576  | 444   | 504   | 660   |
| MSTRG. 8853. 4  | noncoding | -0. 0548864 | 258   | 267   | 420   |
| MSTRG. 8857. 1  | noncoding | -0. 0004096 | 0     | 0     | 207   |
| MSTRG. 8862. 1  | coding    | 0. 207      | 150   | 780   | 1214  |
| MSTRG. 8862. 2  | noncoding | -0. 1028096 | 0     | 144   | 2083  |
| MSTRG. 8863. 1  | coding    | 0. 112      | 18912 | 19158 | 19986 |
| MSTRG. 8864. 1  | coding    | 0. 036      | 1653  | 2103  | 2975  |
| MSTRG. 8865. 1  | noncoding | -0. 18432   | 384   | 438   | 2992  |
| MSTRG. 8881. 2  | noncoding | -0. 0724992 | 333   | 537   | 1297  |
| MSTRG. 8888. 1  | noncoding | -0. 0352256 | 9855  | 10104 | 12999 |
| MSTRG. 8893. 1  | noncoding | -0. 0110592 | 924   | 1176  | 4407  |
| MSTRG. 8894. 1  | noncoding | -0. 01024   | 10302 | 10455 | 31076 |
| MSTRG. 8898. 11 | coding    | 0. 124      | 759   | 3195  | 4591  |
| MSTRG. 8898. 12 | coding    | 0. 116      | 21    | 3588  | 4108  |
| MSTRG. 8898. 13 | coding    | 0. 126      | 774   | 4026  | 4535  |
| MSTRG. 8902. 1  | coding    | 0. 137      | 1560  | 2112  | 5031  |
| MSTRG. 8896. 1  | noncoding | -0. 012288  | 396   | 639   | 981   |
| MSTRG. 8912. 1  | coding    | 0. 28       | 81    | 387   | 4510  |
| MSTRG. 8912. 2  | coding    | 0. 28       | 87    | 393   | 2039  |
| MSTRG. 8913. 1  | noncoding | -0. 02048   | 33    | 159   | 674   |
| MSTRG. 8913. 2  | noncoding | -0. 02048   | 33    | 159   | 773   |
| MSTRG. 8914. 1  | coding    | 0. 136      | 876   | 1113  | 2223  |
| MSTRG. 8914. 2  | coding    | 0. 18       | 876   | 1062  | 1643  |
| MSTRG. 8908. 1  | noncoding | -0. 0630784 | 960   | 1626  | 2673  |
| MSTRG. 8916. 1  | noncoding | -0. 034816  | 0     | 135   | 538   |
| MSTRG. 8919. 5  | coding    | 0. 167      | 330   | 10848 | 14067 |
| MSTRG. 8919. 3  | coding    | 0. 174      | 54    | 11280 | 14499 |
| MSTRG. 8919. 1  | coding    | 0. 161      | 33    | 11595 | 14812 |
| MSTRG. 8919. 2  | coding    | 0. 172      | 222   | 11532 | 14750 |
| MSTRG. 8919. 6  | coding    | 0. 172      | 222   | 11577 | 14795 |
| MSTRG. 8919. 7  | coding    | 0. 175      | 30    | 11301 | 14022 |
| MSTRG. 8919. 8  | coding    | 0. 161      | 123   | 11439 | 14162 |
| MSTRG. 8919. 9  | coding    | 0. 172      | 180   | 11490 | 14110 |
| MSTRG. 8920. 1  | coding    | 0. 305      | 0     | 222   | 458   |
| MSTRG. 8920. 2  | coding    | 0. 283      | 0     | 312   | 467   |
| MSTRG. 8918. 2  | coding    | 0. 327      | 102   | 2115  | 2660  |
| MSTRG. 8932. 2  | coding    | 0. 205      | 285   | 1584  | 2445  |
| MSTRG. 8941. 1  | coding    | 0. 091      | 336   | 1056  | 13154 |
| MSTRG. 8943. 1  | coding    | 0. 098      | 0     | 6450  | 10198 |
| MSTRG. 8943. 2  | coding    | 0. 096      | 0     | 5883  | 9631  |
| MSTRG. 8943. 3  | coding    | 0. 107      | 0     | 5835  | 5991  |
| MSTRG. 8943. 4  | coding    | 0. 103      | 0     | 5292  | 5448  |
| MSTRG. 8943. 5  | coding    | 0. 107      | 0     | 5841  | 5997  |
| MSTRG. 8943. 6  | coding    | 0. 145      | 0     | 891   | 3830  |
| MSTRG. 8943. 7  | coding    | 0. 095      | 0     | 5781  | 8069  |
| MSTRG. 8943. 8  | coding    | 0. 085      | 705   | 6708  | 6863  |
| MSTRG. 8943. 9  | coding    | 0. 08       | 702   | 6180  | 6392  |
| MSTRG. 8943. 10 | coding    | 0. 093      | 699   | 6144  | 6301  |
| MSTRG. 8943. 11 | coding    | 0. 084      | 777   | 6192  | 6404  |
| MSTRG. 8943. 12 | coding    | 0. 085      | 1227  | 6480  | 6635  |
| MSTRG. 8943. 13 | coding    | 0. 089      | 468   | 5394  | 5607  |

|               |           |            |       |       |       |
|---------------|-----------|------------|-------|-------|-------|
| MSTRG.8923.1  | noncoding | -0.0258048 | 2412  | 2547  | 2703  |
| MSTRG.8923.4  | coding    | 0.154      | 213   | 738   | 1192  |
| MSTRG.8923.3  | noncoding | -0.0258048 | 1341  | 1476  | 1633  |
| MSTRG.8924.1  | noncoding | -0.0360448 | 153   | 606   | 759   |
| MSTRG.8928.5  | coding    | 0.313      | 4248  | 6480  | 9773  |
| MSTRG.8929.1  | noncoding | -0.0339968 | 9087  | 9390  | 9545  |
| MSTRG.8949.1  | noncoding | -0.18432   | 267   | 321   | 2269  |
| MSTRG.8949.2  | noncoding | -0.0892928 | 321   | 327   | 520   |
| MSTRG.8951.2  | coding    | 0.563      | 273   | 3048  | 3728  |
| MSTRG.8952.1  | noncoding | -0.02048   | 90    | 111   | 315   |
| MSTRG.8954.1  | noncoding | -0.0524288 | 2667  | 2859  | 5014  |
| MSTRG.8955.1  | noncoding | -0.016384  | 39    | 177   | 822   |
| MSTRG.8957.1  | noncoding | -0.1441792 | 0     | 39    | 534   |
| MSTRG.8961.2  | noncoding | -0.0258048 | 51    | 264   | 578   |
| MSTRG.8962.2  | noncoding | -0.0851968 | 18    | 243   | 398   |
| MSTRG.8962.3  | coding    | 0.282      | 0     | 483   | 7436  |
| MSTRG.8966.1  | noncoding | -0.04096   | 471   | 588   | 1101  |
| MSTRG.8967.3  | coding    | 0.228      | 147   | 1197  | 1483  |
| MSTRG.8971.2  | coding    | 0.507      | 0     | 1866  | 2799  |
| MSTRG.8972.2  | coding    | 0.15       | 210   | 3396  | 6772  |
| MSTRG.8976.1  | noncoding | -0.0004096 | 0     | 0     | 297   |
| MSTRG.8981.1  | noncoding | -0.024576  | 9     | 102   | 410   |
| MSTRG.8994.1  | coding    | 0.256      | 339   | 3150  | 7114  |
| MSTRG.8994.6  | noncoding | -0.1830912 | 0     | 1185  | 5355  |
| MSTRG.8994.2  | coding    | 0.237      | 81    | 2427  | 6390  |
| MSTRG.8994.4  | coding    | 0.262      | 258   | 2886  | 6849  |
| MSTRG.8994.7  | noncoding | -0.200704  | 777   | 801   | 1314  |
| MSTRG.8995.1  | noncoding | -0.045056  | 3828  | 3939  | 5347  |
| MSTRG.8996.1  | noncoding | -0.032768  | 447   | 543   | 696   |
| MSTRG.8996.2  | noncoding | -0.1380352 | 0     | 96    | 759   |
| MSTRG.8996.3  | noncoding | -0.159744  | 531   | 564   | 718   |
| MSTRG.9002.2  | coding    | 0.17       | 939   | 1170  | 3060  |
| MSTRG.9000.2  | noncoding | -0.0339968 | 0     | 210   | 851   |
| MSTRG.9000.3  | coding    | 0.069      | 1320  | 1551  | 2867  |
| MSTRG.9000.4  | coding    | 0.069      | 1329  | 1560  | 2892  |
| MSTRG.9003.2  | coding    | 0.143      | 0     | 687   | 4262  |
| MSTRG.9010.1  | coding    | 0.152      | 102   | 2019  | 4819  |
| MSTRG.9010.2  | coding    | 0.16       | 912   | 3042  | 5740  |
| MSTRG.9010.3  | coding    | 0.16       | 891   | 3021  | 3811  |
| MSTRG.9010.4  | coding    | 0.16       | 672   | 2802  | 3588  |
| MSTRG.9010.5  | coding    | 0.16       | 762   | 2892  | 3600  |
| MSTRG.9010.6  | coding    | 0.16       | 1578  | 3708  | 4494  |
| MSTRG.9010.7  | coding    | 0.16       | 507   | 2637  | 3418  |
| MSTRG.9010.9  | coding    | 0.087      | 4992  | 5628  | 6494  |
| MSTRG.9010.10 | noncoding | -0.0499712 | 39    | 918   | 4923  |
| MSTRG.9010.11 | noncoding | -0.0475136 | 828   | 1473  | 1627  |
| MSTRG.9010.12 | noncoding | -0.0483328 | 30    | 714   | 1900  |
| MSTRG.9010.13 | noncoding | -0.0335872 | 201   | 711   | 866   |
| MSTRG.9005.1  | noncoding | -0.049152  | 138   | 240   | 395   |
| MSTRG.9008.1  | noncoding | -0.024576  | 204   | 213   | 515   |
| MSTRG.9011.1  | coding    | 0.256      | 180   | 603   | 1085  |
| MSTRG.9025.1  | coding    | 0.345      | 30    | 1047  | 1200  |
| MSTRG.9027.2  | noncoding | -0.0057344 | 570   | 699   | 1113  |
| MSTRG.9029.3  | noncoding | -0.0806912 | 15090 | 15591 | 15751 |

|                 |           |             |      |      |       |
|-----------------|-----------|-------------|------|------|-------|
| MSTRG. 9029. 4  | coding    | 0. 246      | 2445 | 6591 | 8624  |
| MSTRG. 9029. 5  | noncoding | -0. 0364544 | 6576 | 7296 | 7846  |
| MSTRG. 9034. 1  | coding    | 0. 675      | 102  | 1323 | 1477  |
| MSTRG. 9034. 2  | coding    | 0. 687      | 0    | 1173 | 3875  |
| MSTRG. 9036. 2  | coding    | 0. 445      | 534  | 1035 | 1900  |
| MSTRG. 9036. 3  | coding    | 0. 447      | 264  | 822  | 1686  |
| MSTRG. 9038. 1  | noncoding | -0. 0229376 | 51   | 273  | 998   |
| MSTRG. 9040. 3  | coding    | 0. 462      | 0    | 2367 | 7476  |
| MSTRG. 9040. 4  | coding    | 0. 475      | 282  | 2514 | 2702  |
| MSTRG. 9041. 1  | coding    | 0. 445      | 0    | 1698 | 1854  |
| MSTRG. 9041. 2  | coding    | 0. 453      | 0    | 1386 | 2137  |
| MSTRG. 9042. 1  | noncoding | -0. 0208896 | 147  | 594  | 757   |
| MSTRG. 9042. 2  | noncoding | -0. 0630784 | 297  | 534  | 693   |
| MSTRG. 9043. 1  | noncoding | -0. 1441792 | 0    | 108  | 368   |
| MSTRG. 9045. 2  | noncoding | -0. 1736704 | 0    | 183  | 887   |
| MSTRG. 9046. 2  | noncoding | -0. 1593344 | 0    | 642  | 1829  |
| MSTRG. 9050. 1  | coding    | 0. 371      | 0    | 2064 | 2242  |
| MSTRG. 9051. 1  | noncoding | -0. 0704512 | 369  | 2589 | 2858  |
| MSTRG. 9053. 3  | noncoding | -0. 1253376 | 0    | 342  | 498   |
| MSTRG. 9053. 5  | noncoding | -0. 1200128 | 0    | 339  | 495   |
| MSTRG. 9053. 6  | noncoding | -0. 0761856 | 0    | 861  | 1015  |
| MSTRG. 9053. 4  | coding    | 0. 438      | 0    | 4146 | 4312  |
| MSTRG. 9053. 7  | noncoding | -0. 1077248 | 753  | 1773 | 2002  |
| MSTRG. 9054. 1  | noncoding | -0. 0598016 | 417  | 843  | 1000  |
| MSTRG. 9055. 1  | coding    | 0. 406      | 0    | 9762 | 9922  |
| MSTRG. 9055. 4  | coding    | 0. 406      | 159  | 9621 | 10147 |
| MSTRG. 9058. 1  | coding    | 0. 322      | 0    | 2085 | 4231  |
| MSTRG. 9058. 2  | coding    | 0. 311      | 0    | 1455 | 2835  |
| MSTRG. 9058. 3  | coding    | 0. 229      | 0    | 1683 | 2966  |
| MSTRG. 9058. 4  | coding    | 0. 218      | 1911 | 2823 | 4313  |
| MSTRG. 9058. 8  | coding    | 0. 218      | 4512 | 5424 | 5725  |
| MSTRG. 9058. 10 | coding    | 0. 25       | 0    | 936  | 1774  |
| MSTRG. 9058. 11 | coding    | 0. 319      | 0    | 1593 | 1764  |
| MSTRG. 9058. 5  | coding    | 0. 266      | 0    | 987  | 1427  |
| MSTRG. 9058. 6  | coding    | 0. 276      | 0    | 1296 | 1748  |
| MSTRG. 9058. 7  | coding    | 0. 252      | 0    | 1170 | 1327  |
| MSTRG. 9058. 9  | coding    | 0. 315      | 0    | 1641 | 1812  |
| MSTRG. 9058. 12 | coding    | 0. 276      | 0    | 1296 | 1998  |
| MSTRG. 9058. 14 | coding    | 0. 319      | 0    | 1512 | 1876  |
| MSTRG. 9059. 3  | noncoding | -0. 0954368 | 0    | 174  | 768   |
| MSTRG. 9059. 2  | coding    | 0. 455      | 0    | 1827 | 2931  |
| MSTRG. 9062. 6  | coding    | 0. 287      | 108  | 1956 | 3778  |
| MSTRG. 9056. 2  | noncoding | -0. 0356352 | 2535 | 3753 | 3908  |
| MSTRG. 9081. 6  | noncoding | -0. 0745472 | 2550 | 2886 | 3138  |
| MSTRG. 9081. 7  | coding    | 0. 416      | 0    | 4773 | 5036  |
| MSTRG. 9081. 5  | coding    | 0. 355      | 3264 | 7596 | 7858  |
| MSTRG. 9081. 3  | coding    | 0. 415      | 0    | 4821 | 5084  |
| MSTRG. 9081. 1  | coding    | 0. 434      | 0    | 4536 | 4800  |
| MSTRG. 9081. 4  | coding    | 0. 425      | 0    | 4650 | 4914  |
| MSTRG. 9081. 8  | coding    | 0. 421      | 1131 | 5799 | 5954  |
| MSTRG. 9081. 9  | coding    | 0. 444      | 0    | 4455 | 4610  |
| MSTRG. 9081. 10 | coding    | 0. 392      | 4920 | 7212 | 7584  |
| MSTRG. 9081. 11 | coding    | 0. 479      | 2358 | 3375 | 3778  |
| MSTRG. 9081. 12 | noncoding | -0. 0720896 | 0    | 1131 | 6322  |

|               |           |            |       |       |       |
|---------------|-----------|------------|-------|-------|-------|
| MSTRG.9082.1  | coding    | 0.081      | 10653 | 11970 | 14778 |
| MSTRG.9082.2  | coding    | 0.041      | 2661  | 3561  | 4575  |
| MSTRG.9083.1  | noncoding | -0.0995328 | 0     | 39    | 1162  |
| MSTRG.9084.1  | noncoding | -0.0761856 | 0     | 873   | 4332  |
| MSTRG.9083.10 | coding    | 0.346      | 492   | 957   | 3135  |
| MSTRG.9083.12 | coding    | 0.346      | 507   | 972   | 3152  |
| MSTRG.9083.13 | coding    | 0.346      | 510   | 975   | 3155  |
| MSTRG.9083.15 | coding    | 0.346      | 1242  | 1707  | 3887  |
| MSTRG.9083.9  | noncoding | -0.0557056 | 0     | 1350  | 3530  |
| MSTRG.9083.4  | coding    | 0.346      | 1257  | 1722  | 3902  |
| MSTRG.9083.8  | coding    | 0.346      | 222   | 687   | 2867  |
| MSTRG.9083.7  | coding    | 0.346      | 1296  | 1761  | 3940  |
| MSTRG.9083.16 | noncoding | -0.0217088 | 510   | 546   | 1128  |
| MSTRG.9085.2  | coding    | 0.624      | 0     | 474   | 1601  |
| MSTRG.9072.1  | noncoding | -0.0770048 | 0     | 606   | 873   |
| MSTRG.9075.2  | noncoding | -0.047104  | 129   | 939   | 2387  |
| MSTRG.9089.1  | coding    | 0.297      | 231   | 597   | 753   |
| MSTRG.9090.2  | coding    | 0.485      | 0     | 1437  | 1987  |
| MSTRG.9090.3  | coding    | 0.432      | 0     | 1950  | 2501  |
| MSTRG.9091.4  | coding    | 0.397      | 177   | 4077  | 4230  |
| MSTRG.9091.5  | coding    | 0.333      | 900   | 2742  | 7831  |
| MSTRG.9091.6  | coding    | 0.342      | 0     | 1860  | 6947  |
| MSTRG.9091.8  | noncoding | -0.0425984 | 5211  | 5712  | 10980 |
| MSTRG.9092.1  | noncoding | -0.0618496 | 2232  | 2592  | 2954  |
| MSTRG.9093.4  | coding    | 0.387      | 1194  | 3567  | 3809  |
| MSTRG.9094.2  | coding    | 0.458      | 0     | 1059  | 2217  |
| MSTRG.9097.1  | noncoding | -0.0561152 | 1263  | 3159  | 3495  |
| MSTRG.9097.2  | noncoding | -0.0897024 | 0     | 777   | 1076  |
| MSTRG.9103.5  | coding    | 0.395      | 0     | 2958  | 10161 |
| MSTRG.9103.2  | coding    | 0.404      | 0     | 2637  | 10023 |
| MSTRG.9104.3  | coding    | 0.545      | 1716  | 2880  | 3751  |
| MSTRG.9104.4  | coding    | 0.55       | 75    | 1242  | 2113  |
| MSTRG.9104.5  | coding    | 0.547      | 336   | 1518  | 2388  |
| MSTRG.9104.7  | coding    | 0.544      | 573   | 1734  | 2604  |
| MSTRG.9104.6  | coding    | 0.532      | 324   | 1443  | 2315  |
| MSTRG.9104.8  | noncoding | -0.059392  | 405   | 1548  | 4429  |
| MSTRG.9100.2  | noncoding | -0.0589824 | 15    | 237   | 659   |
| MSTRG.9107.8  | coding    | 0.494      | 426   | 2109  | 2516  |
| MSTRG.9107.6  | coding    | 0.361      | 0     | 2493  | 2901  |
| MSTRG.9108.1  | noncoding | -0.1134592 | 0     | 420   | 610   |
| MSTRG.9111.1  | noncoding | -0.129024  | 87    | 348   | 504   |
| MSTRG.9112.2  | coding    | 0.171      | 237   | 1149  | 1325  |
| MSTRG.9113.1  | noncoding | -0.094208  | 0     | 543   | 877   |
| MSTRG.9110.1  | coding    | 0.293      | 0     | 321   | 713   |
| MSTRG.9116.3  | coding    | 0.359      | 0     | 2718  | 3091  |
| MSTRG.9125.6  | coding    | 0.435      | 699   | 1893  | 2594  |
| MSTRG.9125.2  | coding    | 0.279      | 0     | 1920  | 2621  |
| MSTRG.9125.3  | coding    | 0.47       | 225   | 1998  | 2700  |
| MSTRG.9125.4  | coding    | 0.273      | 0     | 1959  | 2660  |
| MSTRG.9125.5  | coding    | 0.4        | 840   | 2103  | 2804  |
| MSTRG.9126.4  | coding    | 0.479      | 507   | 3285  | 7735  |
| MSTRG.9127.1  | noncoding | -0.059392  | 15072 | 18660 | 31197 |
| MSTRG.9120.2  | coding    | 0.278      | 219   | 1329  | 1913  |
| MSTRG.9120.3  | coding    | 0.232      | 306   | 894   | 5300  |

|               |           |            |      |      |       |
|---------------|-----------|------------|------|------|-------|
| MSTRG.9123.1  | coding    | 0.184      | 0    | 651  | 1171  |
| MSTRG.9123.2  | coding    | 0.17       | 0    | 603  | 1107  |
| MSTRG.9129.1  | coding    | 0.183      | 123  | 534  | 871   |
| MSTRG.9129.2  | coding    | 0.229      | 0    | 624  | 853   |
| MSTRG.9128.1  | noncoding | -0.0602112 | 0    | 1545 | 1701  |
| MSTRG.9133.3  | coding    | 0.222      | 1362 | 2685 | 2840  |
| MSTRG.9136.1  | noncoding | -0.0544768 | 141  | 384  | 610   |
| MSTRG.9138.1  | coding    | 0.067      | 0    | 1917 | 3197  |
| MSTRG.9138.3  | coding    | 0.059      | 12   | 1932 | 4835  |
| MSTRG.9139.1  | noncoding | -0.036864  | 0    | 90   | 1099  |
| MSTRG.9138.4  | noncoding | -0.0790528 | 1743 | 2001 | 2184  |
| MSTRG.9140.1  | noncoding | -0.0630784 | 6429 | 6792 | 7114  |
| MSTRG.9140.3  | noncoding | -0.0724992 | 648  | 1029 | 1348  |
| MSTRG.9142.1  | noncoding | -0.0004096 | 0    | 0    | 393   |
| MSTRG.9145.3  | coding    | 0.305      | 66   | 2256 | 3158  |
| MSTRG.9145.5  | coding    | 0.317      | 240  | 2106 | 3007  |
| MSTRG.9145.2  | coding    | 0.32       | 456  | 2403 | 3315  |
| MSTRG.9145.4  | coding    | 0.32       | 240  | 2232 | 3142  |
| MSTRG.9145.6  | coding    | 0.301      | 117  | 1095 | 2552  |
| MSTRG.9147.1  | noncoding | -0.012288  | 72   | 147  | 3501  |
| MSTRG.9146.4  | coding    | 0.114      | 498  | 1245 | 3094  |
| MSTRG.9146.5  | coding    | 0.141      | 498  | 990  | 4194  |
| MSTRG.9144.3  | coding    | 0.289      | 0    | 585  | 1794  |
| MSTRG.9144.2  | coding    | 0.254      | 0    | 810  | 3881  |
| MSTRG.9157.3  | coding    | 0.293      | 0    | 1320 | 2116  |
| MSTRG.9157.4  | noncoding | -0.0315392 | 1626 | 1953 | 2159  |
| MSTRG.9153.3  | coding    | 0.228      | 618  | 2316 | 4248  |
| MSTRG.9148.1  | noncoding | -0.0626688 | 2502 | 3243 | 3397  |
| MSTRG.9150.1  | coding    | 0.428      | 0    | 633  | 788   |
| MSTRG.9150.2  | coding    | 0.428      | 0    | 630  | 785   |
| MSTRG.9175.2  | coding    | 0.067      | 501  | 1143 | 2479  |
| MSTRG.9175.4  | coding    | 0.083      | 207  | 1434 | 2324  |
| MSTRG.9175.10 | coding    | 0.043      | 435  | 1116 | 1781  |
| MSTRG.9175.9  | coding    | 0.067      | 60   | 702  | 1811  |
| MSTRG.9175.8  | coding    | 0.043      | 462  | 1143 | 2033  |
| MSTRG.9167.2  | coding    | 0.435      | 0    | 3435 | 4115  |
| MSTRG.9168.1  | noncoding | -0.0282624 | 63   | 246  | 417   |
| MSTRG.9188.1  | noncoding | -0.0073728 | 87   | 243  | 871   |
| MSTRG.9190.1  | coding    | 0.29       | 669  | 978  | 1189  |
| MSTRG.9190.3  | coding    | 0.344      | 153  | 462  | 619   |
| MSTRG.9190.2  | coding    | 0.398      | 0    | 285  | 440   |
| MSTRG.9194.1  | noncoding | -0.0561152 | 2319 | 2709 | 4099  |
| MSTRG.9194.2  | noncoding | -0.0118784 | 1020 | 1932 | 2088  |
| MSTRG.9193.3  | coding    | 0.477      | 0    | 591  | 10040 |
| MSTRG.9202.1  | coding    | 0.399      | 0    | 3219 | 3374  |
| MSTRG.9203.1  | coding    | 0.436      | 0    | 270  | 423   |
| MSTRG.9205.1  | coding    | 0.566      | 0    | 4713 | 4867  |
| MSTRG.9205.2  | coding    | 0.46       | 0    | 1158 | 1315  |
| MSTRG.9206.1  | noncoding | -0.057344  | 2010 | 2355 | 2617  |
| MSTRG.9209.2  | coding    | 0.411      | 132  | 864  | 1956  |
| MSTRG.9209.3  | coding    | 0.378      | 1881 | 2700 | 3649  |
| MSTRG.9211.3  | coding    | 0.283      | 0    | 570  | 780   |
| MSTRG.9211.4  | coding    | 0.247      | 1056 | 1509 | 1720  |
| MSTRG.9217.2  | noncoding | -0.0557056 | 297  | 525  | 1068  |

|                 |           |             |      |       |       |
|-----------------|-----------|-------------|------|-------|-------|
| MSTRG. 9230. 1  | noncoding | -0. 0008192 | 519  | 561   | 716   |
| MSTRG. 9231. 1  | coding    | 0. 506      | 204  | 2073  | 4094  |
| MSTRG. 9231. 3  | coding    | 0. 51       | 1545 | 3303  | 3571  |
| MSTRG. 9233. 1  | coding    | 0. 423      | 0    | 1323  | 4013  |
| MSTRG. 9233. 5  | coding    | 0. 439      | 0    | 1206  | 3897  |
| MSTRG. 9235. 3  | coding    | 0. 413      | 0    | 585   | 1753  |
| MSTRG. 9235. 4  | coding    | 0. 355      | 0    | 696   | 2477  |
| MSTRG. 9239. 6  | coding    | 0. 371      | 576  | 2625  | 5819  |
| MSTRG. 9239. 9  | coding    | 0. 374      | 177  | 2124  | 2881  |
| MSTRG. 9239. 8  | coding    | 0. 307      | 0    | 2739  | 3497  |
| MSTRG. 9240. 1  | noncoding | -0. 118784  | 0    | 414   | 2203  |
| MSTRG. 9249. 4  | coding    | 0. 557      | 660  | 2028  | 2584  |
| MSTRG. 9249. 5  | coding    | 0. 544      | 315  | 1812  | 2361  |
| MSTRG. 9250. 6  | coding    | 0. 25       | 276  | 3582  | 3909  |
| MSTRG. 9250. 7  | coding    | 0. 247      | 276  | 3543  | 5883  |
| MSTRG. 9250. 8  | coding    | 0. 247      | 276  | 3543  | 4003  |
| MSTRG. 9250. 10 | coding    | 0. 248      | 114  | 3387  | 3714  |
| MSTRG. 9250. 9  | coding    | 0. 241      | 114  | 3270  | 6784  |
| MSTRG. 9258. 3  | coding    | 0. 5        | 228  | 2334  | 2559  |
| MSTRG. 9258. 5  | coding    | 0. 405      | 0    | 2607  | 2827  |
| MSTRG. 9259. 2  | coding    | 0. 45       | 0    | 1809  | 6857  |
| MSTRG. 9260. 1  | noncoding | -0. 1093632 | 0    | 117   | 646   |
| MSTRG. 9260. 2  | noncoding | -0. 0458752 | 102  | 141   | 485   |
| MSTRG. 9256. 3  | coding    | 0. 332      | 0    | 1041  | 1365  |
| MSTRG. 9257. 3  | coding    | 0. 412      | 123  | 567   | 748   |
| MSTRG. 9264. 2  | coding    | 0. 551      | 0    | 366   | 522   |
| MSTRG. 9266. 1  | coding    | 0. 446      | 468  | 1101  | 2186  |
| MSTRG. 9266. 2  | coding    | 0. 39       | 294  | 819   | 1956  |
| MSTRG. 9266. 3  | coding    | 0. 371      | 195  | 480   | 1550  |
| MSTRG. 9267. 2  | coding    | 0. 539      | 0    | 1305  | 1882  |
| MSTRG. 9267. 3  | coding    | 0. 488      | 0    | 1380  | 1958  |
| MSTRG. 9268. 2  | noncoding | -0. 2035712 | 0    | 447   | 928   |
| MSTRG. 9269. 1  | noncoding | -0. 0589824 | 576  | 1407  | 1562  |
| MSTRG. 9298. 1  | coding    | 0. 281      | 54   | 4833  | 5327  |
| MSTRG. 9298. 18 | coding    | 0. 213      | 216  | 10893 | 11096 |
| MSTRG. 9298. 10 | coding    | 0. 229      | 216  | 6597  | 9865  |
| MSTRG. 9298. 17 | coding    | 0. 267      | 216  | 4359  | 5064  |
| MSTRG. 9298. 20 | coding    | 0. 224      | 216  | 7650  | 7805  |
| MSTRG. 9298. 11 | coding    | 0. 214      | 216  | 11313 | 11530 |
| MSTRG. 9298. 12 | coding    | 0. 213      | 216  | 10983 | 11187 |
| MSTRG. 9298. 13 | coding    | 0. 302      | 216  | 4710  | 4924  |
| MSTRG. 9298. 15 | coding    | 0. 168      | 873  | 10065 | 10278 |
| MSTRG. 9298. 16 | coding    | 0. 211      | 216  | 11118 | 11332 |
| MSTRG. 9298. 9  | coding    | 0. 294      | 294  | 4866  | 5080  |
| MSTRG. 9298. 24 | coding    | 0. 24       | 0    | 3489  | 3985  |
| MSTRG. 9298. 26 | coding    | 0. 242      | 0    | 3927  | 4080  |
| MSTRG. 9298. 25 | coding    | 0. 318      | 0    | 3069  | 3274  |
| MSTRG. 9298. 30 | coding    | 0. 163      | 0    | 975   | 1130  |
| MSTRG. 9298. 31 | coding    | 0. 163      | 0    | 975   | 1130  |
| MSTRG. 9298. 29 | coding    | 0. 179      | 0    | 5532  | 5736  |
| MSTRG. 9298. 33 | coding    | 0. 294      | 117  | 4689  | 4903  |
| MSTRG. 9298. 34 | coding    | 0. 299      | 192  | 4686  | 5181  |
| MSTRG. 9298. 35 | coding    | 0. 191      | 54   | 2202  | 2407  |
| MSTRG. 9298. 36 | coding    | 0. 192      | 54   | 2172  | 2377  |



|               |           |            |      |      |       |
|---------------|-----------|------------|------|------|-------|
| MSTRG.9278.2  | coding    | 0.325      | 120  | 786  | 1007  |
| MSTRG.9281.1  | noncoding | -0.0319488 | 393  | 774  | 927   |
| MSTRG.9283.2  | coding    | 0.539      | 12   | 807  | 1100  |
| MSTRG.9284.1  | noncoding | -0.0217088 | 108  | 333  | 636   |
| MSTRG.9285.2  | coding    | 0.381      | 93   | 642  | 804   |
| MSTRG.9287.2  | noncoding | -0.0561152 | 276  | 654  | 811   |
| MSTRG.9290.1  | coding    | 0.427      | 0    | 3666 | 5238  |
| MSTRG.9291.1  | coding    | 0.494      | 0    | 2973 | 7747  |
| MSTRG.9291.3  | coding    | 0.453      | 84   | 927  | 5338  |
| MSTRG.9295.1  | coding    | 0.569      | 252  | 2274 | 10724 |
| MSTRG.9295.2  | coding    | 0.532      | 9    | 2193 | 10643 |
| MSTRG.9295.4  | coding    | 0.575      | 339  | 2346 | 3550  |
| MSTRG.9296.1  | noncoding | -0.098304  | 0    | 375  | 1850  |
| MSTRG.9303.2  | coding    | 0.235      | 723  | 1035 | 1661  |
| MSTRG.9304.1  | coding    | 0.52       | 0    | 1209 | 1715  |
| MSTRG.9305.2  | noncoding | -0.0741376 | 528  | 1302 | 1476  |
| MSTRG.9305.3  | noncoding | -0.0475136 | 177  | 711  | 866   |
| MSTRG.9304.3  | coding    | 0.42       | 24   | 1512 | 2159  |
| MSTRG.9306.1  | noncoding | -0.0688128 | 30   | 591  | 957   |
| MSTRG.9306.2  | noncoding | -0.0864256 | 441  | 678  | 1043  |
| MSTRG.9307.2  | coding    | 0.48       | 0    | 1098 | 1626  |
| MSTRG.9308.4  | coding    | 0.233      | 69   | 987  | 1321  |
| MSTRG.9312.11 | coding    | 0.536      | 0    | 6456 | 7435  |
| MSTRG.9312.12 | coding    | 0.531      | 0    | 6477 | 7456  |
| MSTRG.9312.13 | coding    | 0.538      | 0    | 6438 | 7417  |
| MSTRG.9312.14 | coding    | 0.533      | 0    | 6450 | 7429  |
| MSTRG.9312.3  | coding    | 0.541      | 0    | 6408 | 7387  |
| MSTRG.9312.4  | coding    | 0.538      | 0    | 6441 | 7420  |
| MSTRG.9312.9  | coding    | 0.539      | 0    | 6432 | 7411  |
| MSTRG.9312.15 | coding    | 0.521      | 0    | 6627 | 7605  |
| MSTRG.9312.23 | coding    | 0.574      | 0    | 1107 | 3838  |
| MSTRG.9312.24 | noncoding | -0.0643072 | 1110 | 1500 | 15200 |
| MSTRG.9312.25 | noncoding | -0.1036288 | 0    | 189  | 836   |
| MSTRG.9310.2  | coding    | 0.431      | 6    | 3096 | 4134  |
| MSTRG.9315.1  | noncoding | -0.0507904 | 4626 | 4995 | 13155 |
| MSTRG.9316.1  | noncoding | -0.1499136 | 3    | 9    | 219   |
| MSTRG.9315.3  | noncoding | -0.0507904 | 4164 | 4533 | 14832 |
| MSTRG.9321.3  | noncoding | -0.0811008 | 0    | 585  | 14721 |
| MSTRG.9321.4  | noncoding | -0.0811008 | 0    | 585  | 19190 |
| MSTRG.9322.1  | noncoding | -0.0331776 | 1596 | 1812 | 6551  |
| MSTRG.9325.2  | noncoding | -0.049152  | 0    | 261  | 7606  |
| MSTRG.9327.4  | coding    | 0.216      | 558  | 2436 | 3587  |
| MSTRG.9335.3  | noncoding | -0.049152  | 1038 | 1881 | 8683  |
| MSTRG.9335.4  | noncoding | -0.012288  | 2487 | 4203 | 8252  |
| MSTRG.9333.2  | coding    | 0.543      | 906  | 2271 | 3018  |
| MSTRG.9338.1  | noncoding | -0.0004096 | 285  | 396  | 1776  |
| MSTRG.9361.4  | coding    | 0.428      | 141  | 3498 | 4447  |
| MSTRG.9361.6  | coding    | 0.434      | 0    | 3216 | 4165  |
| MSTRG.9361.7  | coding    | 0.44       | 0    | 3216 | 4166  |
| MSTRG.9361.8  | coding    | 0.437      | 1083 | 4026 | 4975  |
| MSTRG.9361.9  | coding    | 0.437      | 1239 | 4182 | 5131  |
| MSTRG.9361.10 | coding    | 0.437      | 477  | 3420 | 4369  |
| MSTRG.9361.11 | coding    | 0.463      | 0    | 2913 | 3862  |
| MSTRG.9361.13 | coding    | 0.443      | 150  | 2694 | 3643  |

|                 |           |             |       |       |       |
|-----------------|-----------|-------------|-------|-------|-------|
| MSTRG. 9361. 14 | coding    | 0. 446      | 0     | 2589  | 3538  |
| MSTRG. 9365. 1  | noncoding | -0. 016384  | 0     | 153   | 525   |
| MSTRG. 9364. 12 | noncoding | -0. 004096  | 867   | 1038  | 3366  |
| MSTRG. 9364. 13 | coding    | 0. 327      | 27    | 1014  | 3123  |
| MSTRG. 9367. 2  | coding    | 0. 416      | 318   | 2406  | 10602 |
| MSTRG. 9367. 3  | coding    | 0. 405      | 267   | 3414  | 5963  |
| MSTRG. 9367. 4  | coding    | 0. 443      | 210   | 3861  | 5532  |
| MSTRG. 9367. 6  | coding    | 0. 392      | 6     | 2778  | 2933  |
| MSTRG. 9367. 9  | coding    | 0. 41       | 210   | 3081  | 5709  |
| MSTRG. 9367. 10 | coding    | 0. 406      | 45    | 2181  | 7623  |
| MSTRG. 9368. 1  | noncoding | -0. 004096  | 2487  | 2607  | 10623 |
| MSTRG. 9367. 12 | coding    | 0. 405      | 23028 | 25830 | 25987 |
| MSTRG. 9343. 3  | noncoding | -0. 188416  | 0     | 141   | 528   |
| MSTRG. 9349. 1  | noncoding | -0. 0356352 | 21    | 192   | 2549  |
| MSTRG. 9353. 1  | coding    | 0. 163      | 87    | 276   | 501   |
| MSTRG. 9358. 4  | coding    | 0. 348      | 45    | 1083  | 2411  |
| MSTRG. 9358. 1  | coding    | 0. 357      | 114   | 1020  | 2348  |
| MSTRG. 9358. 3  | coding    | 0. 214      | 216   | 1233  | 2563  |
| MSTRG. 9358. 5  | coding    | 0. 208      | 0     | 1068  | 2396  |
| MSTRG. 9358. 6  | coding    | 0. 483      | 0     | 750   | 2078  |
| MSTRG. 9360. 3  | coding    | 0. 368      | 810   | 2232  | 2413  |
| MSTRG. 9369. 3  | coding    | 0. 476      | 2175  | 3462  | 3683  |
| MSTRG. 9369. 4  | coding    | 0. 475      | 2004  | 3294  | 3514  |
| MSTRG. 9369. 5  | coding    | 0. 465      | 1158  | 1854  | 2075  |
| MSTRG. 9374. 1  | coding    | 0. 553      | 0     | 4572  | 5218  |
| MSTRG. 9374. 2  | coding    | 0. 458      | 0     | 5583  | 7393  |
| MSTRG. 9374. 3  | coding    | 0. 55       | 735   | 4857  | 7914  |
| MSTRG. 9374. 5  | coding    | 0. 551      | 606   | 4713  | 5102  |
| MSTRG. 9374. 4  | coding    | 0. 497      | 711   | 5055  | 6853  |
| MSTRG. 9374. 7  | coding    | 0. 529      | 411   | 4719  | 5107  |
| MSTRG. 9372. 2  | coding    | 0. 452      | 2859  | 3804  | 5343  |
| MSTRG. 9372. 3  | coding    | 0. 375      | 2253  | 3519  | 5004  |
| MSTRG. 9373. 3  | noncoding | -0. 1343488 | 228   | 789   | 3708  |
| MSTRG. 9377. 2  | noncoding | -0. 1306624 | 42    | 1170  | 1330  |
| MSTRG. 9386. 6  | noncoding | -0. 159744  | 258   | 1086  | 1242  |
| MSTRG. 9386. 4  | coding    | 0. 507      | 258   | 3387  | 4693  |
| MSTRG. 9379. 1  | noncoding | -0. 053248  | 534   | 582   | 738   |
| MSTRG. 9382. 1  | noncoding | -0. 1335296 | 246   | 609   | 765   |
| MSTRG. 9385. 2  | coding    | 0. 447      | 420   | 1707  | 1903  |
| MSTRG. 9385. 3  | coding    | 0. 459      | 15    | 1320  | 1516  |
| MSTRG. 9396. 1  | coding    | 0. 577      | 822   | 2454  | 3847  |
| MSTRG. 9396. 2  | coding    | 0. 635      | 0     | 1545  | 3551  |
| MSTRG. 9396. 3  | coding    | 0. 595      | 0     | 1719  | 3707  |
| MSTRG. 9398. 4  | coding    | 0. 418      | 309   | 2301  | 2456  |
| MSTRG. 9398. 3  | coding    | 0. 444      | 303   | 2220  | 2377  |
| MSTRG. 9394. 1  | coding    | 0. 472      | 0     | 1338  | 5941  |
| MSTRG. 9394. 2  | coding    | 0. 474      | 0     | 1338  | 5654  |
| MSTRG. 9394. 3  | coding    | 0. 448      | 0     | 1284  | 5529  |
| MSTRG. 9394. 4  | coding    | 0. 504      | 0     | 1197  | 4045  |
| MSTRG. 9393. 1  | noncoding | -0. 002048  | 984   | 1128  | 2154  |
| MSTRG. 9405. 6  | coding    | 0. 419      | 0     | 495   | 797   |
| MSTRG. 9407. 3  | coding    | 0. 398      | 303   | 1221  | 1387  |
| MSTRG. 9410. 1  | coding    | 0. 527      | 12    | 2151  | 2509  |
| MSTRG. 9420. 2  | coding    | 0. 533      | 0     | 645   | 800   |

|                 |           |             |      |       |       |
|-----------------|-----------|-------------|------|-------|-------|
| MSTRG. 9422. 1  | coding    | 0. 507      | 126  | 2862  | 7773  |
| MSTRG. 9422. 4  | coding    | 0. 507      | 120  | 2856  | 3257  |
| MSTRG. 9423. 2  | coding    | 0. 41       | 348  | 1461  | 1627  |
| MSTRG. 9423. 3  | coding    | 0. 403      | 174  | 1101  | 1267  |
| MSTRG. 9423. 4  | coding    | 0. 394      | 195  | 1083  | 1247  |
| MSTRG. 9425. 2  | coding    | 0. 375      | 177  | 927   | 1139  |
| MSTRG. 9411. 2  | noncoding | -0. 049152  | 93   | 306   | 714   |
| MSTRG. 9413. 2  | noncoding | -0. 0622592 | 246  | 432   | 586   |
| MSTRG. 9428. 2  | coding    | 0. 09       | 0    | 765   | 3386  |
| MSTRG. 9436. 1  | coding    | 0. 068      | 558  | 16767 | 20970 |
| MSTRG. 9436. 2  | coding    | 0. 077      | 558  | 17877 | 21306 |
| MSTRG. 9436. 3  | coding    | 0. 105      | 558  | 19305 | 20731 |
| MSTRG. 9436. 4  | coding    | 0. 078      | 558  | 17541 | 20970 |
| MSTRG. 9436. 5  | coding    | 0. 08       | 558  | 10419 | 13848 |
| MSTRG. 9436. 6  | coding    | 0. 127      | 558  | 12528 | 13954 |
| MSTRG. 9436. 10 | coding    | 0. 167      | 735  | 9075  | 9779  |
| MSTRG. 9436. 11 | coding    | 0. 162      | 735  | 9408  | 10112 |
| MSTRG. 9436. 15 | coding    | 0. 104      | 735  | 7215  | 9922  |
| MSTRG. 9436. 12 | coding    | 0. 112      | 480  | 18093 | 18799 |
| MSTRG. 9436. 13 | coding    | 0. 078      | 480  | 15609 | 18318 |
| MSTRG. 9436. 14 | coding    | 0. 112      | 480  | 16839 | 17545 |
| MSTRG. 9436. 9  | coding    | 0. 08       | 480  | 15984 | 18693 |
| MSTRG. 9436. 16 | coding    | 0. 068      | 552  | 16761 | 20048 |
| MSTRG. 9436. 17 | coding    | 0. 068      | 552  | 16284 | 19571 |
| MSTRG. 9436. 18 | coding    | 0. 106      | 552  | 20067 | 20770 |
| MSTRG. 9436. 19 | coding    | 0. 107      | 552  | 19731 | 20434 |
| MSTRG. 9431. 3  | coding    | 0. 147      | 1932 | 3852  | 5175  |
| MSTRG. 9431. 4  | coding    | 0. 147      | 180  | 2067  | 4146  |
| MSTRG. 9445. 1  | coding    | 0. 075      | 7416 | 8181  | 8490  |
| MSTRG. 9446. 2  | noncoding | -0. 012288  | 1926 | 2064  | 2297  |
| MSTRG. 9446. 3  | noncoding | -0. 0512    | 54   | 264   | 709   |
| MSTRG. 9446. 4  | noncoding | -0. 0507904 | 54   | 255   | 700   |
| MSTRG. 9446. 6  | noncoding | -0. 012288  | 294  | 432   | 601   |
| MSTRG. 9449. 1  | coding    | 0. 108      | 60   | 738   | 3028  |
| MSTRG. 9449. 2  | coding    | 0. 211      | 30   | 348   | 551   |
| MSTRG. 9449. 4  | coding    | 0. 212      | 105  | 345   | 1612  |
| MSTRG. 9449. 3  | coding    | 0. 118      | 0    | 606   | 2779  |
| MSTRG. 9449. 5  | noncoding | -0. 073728  | 312  | 378   | 532   |
| MSTRG. 9445. 3  | coding    | 0. 142      | 7536 | 7920  | 18147 |
| MSTRG. 9445. 4  | noncoding | -0. 0741376 | 1143 | 1500  | 2291  |
| MSTRG. 9445. 6  | noncoding | -0. 0036864 | 372  | 666   | 1269  |
| MSTRG. 9453. 1  | noncoding | -0. 0303104 | 354  | 534   | 759   |
| MSTRG. 9453. 2  | noncoding | -0. 0303104 | 348  | 528   | 744   |
| MSTRG. 9453. 3  | noncoding | -0. 0303104 | 1725 | 1905  | 2119  |
| MSTRG. 9434. 2  | coding    | 0. 285      | 0    | 741   | 1218  |
| MSTRG. 9437. 2  | coding    | 0. 23       | 0    | 3333  | 3489  |
| MSTRG. 9441. 1  | coding    | 0. 348      | 468  | 1893  | 2245  |
| MSTRG. 9458. 2  | coding    | 0. 387      | 105  | 5097  | 5502  |
| MSTRG. 9458. 4  | coding    | 0. 398      | 1464 | 6237  | 6508  |
| MSTRG. 9457. 1  | coding    | 0. 383      | 0    | 1185  | 2487  |
| MSTRG. 9464. 2  | noncoding | -0. 0569344 | 6    | 243   | 586   |
| MSTRG. 9464. 1  | noncoding | -0. 0483328 | 84   | 366   | 3160  |
| MSTRG. 9464. 3  | noncoding | -0. 0483328 | 69   | 351   | 3064  |
| MSTRG. 9464. 4  | noncoding | -0. 0466944 | 72   | 621   | 774   |

|               |           |            |      |      |      |
|---------------|-----------|------------|------|------|------|
| MSTRG.9464.5  | noncoding | -0.0700416 | 1101 | 1458 | 1718 |
| MSTRG.9460.1  | coding    | 0.616      | 0    | 1293 | 3357 |
| MSTRG.9471.5  | coding    | 0.467      | 102  | 1845 | 3902 |
| MSTRG.9471.6  | coding    | 0.432      | 123  | 2085 | 2525 |
| MSTRG.9471.7  | coding    | 0.462      | 378  | 2070 | 2511 |
| MSTRG.9471.8  | coding    | 0.437      | 27   | 1548 | 1841 |
| MSTRG.9473.1  | coding    | 0.519      | 0    | 2004 | 7883 |
| MSTRG.9473.2  | coding    | 0.528      | 522  | 2409 | 3020 |
| MSTRG.9473.3  | coding    | 0.47       | 276  | 2493 | 8243 |
| MSTRG.9473.4  | coding    | 0.544      | 27   | 1854 | 2542 |
| MSTRG.9473.5  | coding    | 0.521      | 0    | 1995 | 2308 |
| MSTRG.9468.2  | coding    | 0.385      | 0    | 1143 | 1609 |
| MSTRG.9468.3  | coding    | 0.402      | 546  | 1206 | 1674 |
| MSTRG.9481.4  | coding    | 0.338      | 318  | 2322 | 3794 |
| MSTRG.9481.11 | noncoding | -0.0589824 | 1617 | 1947 | 2101 |
| MSTRG.9481.17 | coding    | 0.338      | 537  | 2541 | 3993 |
| MSTRG.9481.14 | coding    | 0.338      | 300  | 2304 | 3776 |
| MSTRG.9481.15 | coding    | 0.338      | 165  | 2157 | 3629 |
| MSTRG.9481.16 | coding    | 0.338      | 300  | 2292 | 3764 |
| MSTRG.9481.9  | coding    | 0.338      | 276  | 2268 | 3740 |
| MSTRG.9481.10 | coding    | 0.338      | 300  | 2898 | 6445 |
| MSTRG.9481.18 | coding    | 0.322      | 1026 | 2814 | 6359 |
| MSTRG.9481.7  | coding    | 0.338      | 276  | 2874 | 6421 |
| MSTRG.9477.2  | noncoding | -0.067584  | 183  | 612  | 1342 |
| MSTRG.9478.4  | coding    | 0.396      | 465  | 1227 | 1406 |
| MSTRG.9482.7  | coding    | 0.494      | 2406 | 3750 | 4155 |
| MSTRG.9484.1  | noncoding | -0.0331776 | 33   | 303  | 749  |
| MSTRG.9486.2  | coding    | 0.275      | 0    | 1548 | 2652 |
| MSTRG.9493.6  | coding    | 0.648      | 3060 | 6111 | 6649 |
| MSTRG.9493.7  | coding    | 0.645      | 921  | 4023 | 4276 |
| MSTRG.9493.8  | coding    | 0.681      | 0    | 2019 | 2271 |
| MSTRG.9496.4  | coding    | 0.53       | 0    | 6144 | 6424 |
| MSTRG.9498.2  | coding    | 0.463      | 78   | 927  | 1662 |
| MSTRG.9498.8  | coding    | 0.294      | 276  | 729  | 914  |
| MSTRG.9499.1  | coding    | 0.236      | 1551 | 2946 | 3160 |
| MSTRG.9499.2  | coding    | 0.393      | 1455 | 2136 | 2350 |
| MSTRG.9499.4  | coding    | 0.393      | 1740 | 2421 | 2634 |
| MSTRG.9499.5  | coding    | 0.393      | 615  | 1296 | 1511 |
| MSTRG.9500.1  | coding    | 0.371      | 468  | 1572 | 2472 |
| MSTRG.9500.3  | coding    | 0.346      | 138  | 1323 | 2698 |
| MSTRG.9500.4  | coding    | 0.394      | 357  | 1365 | 2739 |
| MSTRG.9503.1  | coding    | 0.488      | 54   | 1875 | 2169 |
| MSTRG.9503.2  | coding    | 0.492      | 108  | 1911 | 2204 |
| MSTRG.9503.3  | coding    | 0.488      | 87   | 1905 | 2197 |
| MSTRG.9503.4  | coding    | 0.489      | 18   | 1845 | 2139 |
| MSTRG.9503.6  | coding    | 0.501      | 174  | 1926 | 2219 |
| MSTRG.9505.2  | coding    | 0.468      | 1134 | 1893 | 2076 |
| MSTRG.9505.3  | coding    | 0.508      | 1728 | 3108 | 3292 |
| MSTRG.9505.4  | coding    | 0.525      | 1329 | 2967 | 3149 |
| MSTRG.9505.5  | coding    | 0.26       | 0    | 2514 | 4086 |
| MSTRG.9505.6  | coding    | 0.466      | 0    | 1272 | 1953 |
| MSTRG.9509.1  | coding    | 0.263      | 0    | 474  | 1099 |
| MSTRG.9509.3  | noncoding | -0.0856064 | 0    | 321  | 631  |
| MSTRG.9516.4  | coding    | 0.523      | 1266 | 3948 | 5786 |

|                |           |             |      |      |      |
|----------------|-----------|-------------|------|------|------|
| MSTRG. 9516. 6 | noncoding | -0. 079872  | 1812 | 2175 | 2380 |
| MSTRG. 9516. 8 | noncoding | -0. 008192  | 1317 | 1449 | 1603 |
| MSTRG. 9516. 7 | coding    | 0. 511      | 204  | 3222 | 5061 |
| MSTRG. 9518. 2 | coding    | 0. 509      | 0    | 4053 | 4566 |
| MSTRG. 9518. 3 | coding    | 0. 516      | 0    | 3990 | 4298 |
| MSTRG. 9522. 1 | coding    | 0. 665      | 0    | 2508 | 3639 |
| MSTRG. 9523. 2 | coding    | 0. 229      | 63   | 285  | 440  |
| MSTRG. 9526. 2 | coding    | 0. 533      | 180  | 1857 | 2011 |
| MSTRG. 9532. 1 | noncoding | -0. 12288   | 273  | 303  | 583  |
| MSTRG. 9534. 1 | coding    | 0. 32       | 0    | 1275 | 5014 |
| MSTRG. 9535. 1 | noncoding | -0. 0589824 | 0    | 345  | 6213 |
| MSTRG. 9535. 2 | noncoding | -0. 0606208 | 0    | 300  | 1584 |
| MSTRG. 9535. 3 | noncoding | -0. 0712704 | 141  | 345  | 6955 |
| MSTRG. 9536. 1 | coding    | 0. 36       | 0    | 4920 | 5671 |
| MSTRG. 9543. 1 | noncoding | -0. 0856064 | 552  | 912  | 1065 |
| MSTRG. 9543. 2 | noncoding | -0. 08192   | 372  | 711  | 865  |
| MSTRG. 9550. 1 | noncoding | -0. 073728  | 315  | 1026 | 1206 |
| MSTRG. 9547. 1 | coding    | 0. 416      | 0    | 1683 | 3993 |
| MSTRG. 9554. 1 | coding    | 0. 17       | 378  | 987  | 1343 |
| MSTRG. 9555. 1 | noncoding | -0. 0192512 | 372  | 459  | 1054 |
| MSTRG. 9556. 1 | noncoding | -0. 0393216 | 603  | 1119 | 1310 |
| MSTRG. 9556. 2 | noncoding | -0. 0393216 | 954  | 1470 | 1628 |
| MSTRG. 9556. 3 | noncoding | -0. 0385024 | 714  | 1215 | 1372 |
| MSTRG. 9563. 1 | coding    | 0. 288      | 69   | 1800 | 2165 |
| MSTRG. 9563. 2 | coding    | 0. 297      | 0    | 1767 | 2006 |
| MSTRG. 9564. 2 | coding    | 0. 447      | 912  | 2688 | 2842 |
| MSTRG. 9565. 4 | coding    | 0. 423      | 0    | 1638 | 1795 |
| MSTRG. 9565. 5 | coding    | 0. 425      | 0    | 1518 | 1851 |
| MSTRG. 9566. 2 | coding    | 0. 212      | 87   | 1209 | 1624 |
| MSTRG. 9566. 3 | coding    | 0. 267      | 0    | 876  | 1828 |
| MSTRG. 9574. 3 | coding    | 0. 325      | 393  | 3786 | 5756 |
| MSTRG. 9574. 4 | coding    | 0. 352      | 396  | 2706 | 3679 |
| MSTRG. 9574. 5 | coding    | 0. 31       | 96   | 2781 | 4750 |
| MSTRG. 9574. 6 | coding    | 0. 321      | 18   | 2574 | 4273 |
| MSTRG. 9574. 7 | coding    | 0. 377      | 0    | 2124 | 3335 |
| MSTRG. 9576. 1 | coding    | 0. 565      | 132  | 1692 | 1849 |
| MSTRG. 9576. 2 | coding    | 0. 558      | 60   | 1659 | 1816 |
| MSTRG. 9576. 3 | coding    | 0. 56       | 162  | 1740 | 1895 |
| MSTRG. 9567. 2 | coding    | 0. 481      | 0    | 123  | 451  |
| MSTRG. 9567. 3 | coding    | 0. 565      | 0    | 288  | 625  |
| MSTRG. 9567. 4 | noncoding | -0. 0352256 | 207  | 501  | 656  |
| MSTRG. 9568. 2 | coding    | 0. 497      | 0    | 555  | 1116 |
| MSTRG. 9571. 1 | noncoding | -0. 0561152 | 0    | 297  | 977  |
| MSTRG. 9577. 4 | coding    | 0. 273      | 249  | 1116 | 1886 |
| MSTRG. 9586. 3 | coding    | 0. 355      | 870  | 2781 | 3949 |
| MSTRG. 9587. 2 | noncoding | -0. 1220608 | 51   | 516  | 2032 |
| MSTRG. 9589. 3 | coding    | 0. 485      | 153  | 2010 | 2184 |
| MSTRG. 9589. 5 | coding    | 0. 486      | 108  | 1197 | 1350 |
| MSTRG. 9590. 2 | coding    | 0. 362      | 2139 | 3129 | 3354 |
| MSTRG. 9590. 3 | coding    | 0. 325      | 2106 | 2976 | 5967 |
| MSTRG. 9590. 5 | coding    | 0. 24       | 585  | 1353 | 1510 |
| MSTRG. 9590. 7 | coding    | 0. 171      | 654  | 1938 | 2215 |
| MSTRG. 9590. 6 | coding    | 0. 171      | 786  | 2070 | 2346 |
| MSTRG. 9591. 1 | coding    | 0. 664      | 63   | 2640 | 2807 |

|               |           |            |      |      |      |
|---------------|-----------|------------|------|------|------|
| MSTRG.9591.3  | coding    | 0.588      | 0    | 3039 | 3207 |
| MSTRG.9598.10 | noncoding | -0.0872448 | 1077 | 1887 | 2505 |
| MSTRG.9598.3  | noncoding | -0.1077248 | 1077 | 1503 | 2211 |
| MSTRG.9598.4  | noncoding | -0.1077248 | 189  | 615  | 1324 |
| MSTRG.9598.6  | noncoding | -0.0958464 | 189  | 597  | 1287 |
| MSTRG.9598.7  | noncoding | -0.0999424 | 390  | 1032 | 1651 |
| MSTRG.9598.8  | noncoding | -0.0958464 | 156  | 564  | 1255 |
| MSTRG.9598.9  | noncoding | -0.0999424 | 1659 | 2301 | 2921 |
| MSTRG.9599.1  | coding    | 0.29       | 399  | 798  | 981  |
| MSTRG.9599.3  | coding    | 0.29       | 252  | 651  | 836  |
| MSTRG.9599.4  | noncoding | -0.0753664 | 294  | 522  | 824  |
| MSTRG.9600.12 | coding    | 0.374      | 7119 | 8604 | 8791 |
| MSTRG.9600.8  | coding    | 0.358      | 0    | 2679 | 2864 |
| MSTRG.9600.13 | coding    | 0.358      | 726  | 4320 | 4505 |
| MSTRG.9600.7  | coding    | 0.347      | 87   | 2745 | 2931 |
| MSTRG.9600.9  | coding    | 0.346      | 87   | 2745 | 2931 |
| MSTRG.9600.16 | coding    | 0.27       | 0    | 318  | 1980 |
| MSTRG.9602.2  | coding    | 0.418      | 708  | 2328 | 2672 |
| MSTRG.9594.1  | coding    | 0.565      | 0    | 897  | 1203 |
| MSTRG.9594.2  | coding    | 0.31       | 9    | 495  | 860  |
| MSTRG.9594.3  | coding    | 0.486      | 9    | 876  | 1241 |
| MSTRG.9594.5  | coding    | 0.484      | 144  | 1245 | 1623 |
| MSTRG.9597.1  | coding    | 0.502      | 123  | 3699 | 5300 |
| MSTRG.9597.2  | coding    | 0.514      | 123  | 3597 | 5198 |
| MSTRG.9597.3  | coding    | 0.502      | 609  | 4185 | 5782 |
| MSTRG.9597.4  | coding    | 0.514      | 1263 | 4737 | 5819 |
| MSTRG.9604.3  | coding    | 0.528      | 384  | 2712 | 4186 |
| MSTRG.9604.4  | coding    | 0.522      | 0    | 2376 | 2587 |
| MSTRG.9605.1  | noncoding | -0.004096  | 222  | 231  | 454  |
| MSTRG.9605.2  | noncoding | -0.0258048 | 30   | 87   | 313  |
| MSTRG.9606.1  | coding    | 0.348      | 210  | 846  | 999  |
| MSTRG.9610.1  | noncoding | -0.0417792 | 114  | 351  | 581  |
| MSTRG.9610.2  | noncoding | -0.0827392 | 72   | 435  | 718  |
| MSTRG.9612.2  | coding    | 0.584      | 501  | 1056 | 3155 |
| MSTRG.9612.3  | coding    | 0.584      | 216  | 771  | 2871 |
| MSTRG.9613.1  | noncoding | -0.012288  | 120  | 249  | 570  |
| MSTRG.9612.4  | noncoding | -0.006144  | 426  | 621  | 849  |
| MSTRG.9603.1  | noncoding | -0.045056  | 150  | 234  | 640  |
| MSTRG.9617.3  | coding    | 0.574      | 207  | 1425 | 1787 |
| MSTRG.9619.2  | coding    | 0.431      | 558  | 3354 | 3845 |
| MSTRG.9620.1  | coding    | 0.282      | 240  | 792  | 958  |
| MSTRG.9620.2  | coding    | 0.271      | 66   | 756  | 922  |
| MSTRG.9624.3  | coding    | 0.466      | 21   | 960  | 1492 |
| MSTRG.9625.1  | noncoding | -0.067584  | 882  | 1308 | 2048 |
| MSTRG.9626.1  | coding    | 0.443      | 9    | 1047 | 1764 |
| MSTRG.9626.2  | coding    | 0.488      | 0    | 951  | 1646 |
| MSTRG.9630.2  | coding    | 0.409      | 42   | 1839 | 2132 |
| MSTRG.9634.3  | noncoding | -0.0106496 | 1917 | 2184 | 2339 |
| MSTRG.9634.4  | noncoding | -0.0282624 | 591  | 801  | 1098 |
| MSTRG.9633.3  | coding    | 0.378      | 0    | 318  | 1496 |
| MSTRG.9633.2  | coding    | 0.378      | 0    | 318  | 1785 |
| MSTRG.9638.1  | coding    | 0.456      | 0    | 2166 | 2344 |
| MSTRG.9640.4  | coding    | 0.516      | 0    | 1848 | 3904 |
| MSTRG.9649.4  | coding    | 0.473      | 156  | 1695 | 1926 |

|               |           |            |       |       |       |
|---------------|-----------|------------|-------|-------|-------|
| MSTRG.9643.1  | coding    | 0.591      | 0     | 1083  | 1238  |
| MSTRG.9651.6  | coding    | 0.337      | 15972 | 16803 | 17190 |
| MSTRG.9650.1  | noncoding | -0.002048  | 39    | 186   | 340   |
| MSTRG.9653.1  | coding    | 0.662      | 252   | 1230  | 3385  |
| MSTRG.9653.2  | coding    | 0.67       | 2373  | 3372  | 5509  |
| MSTRG.9655.3  | coding    | 0.399      | 60    | 2292  | 2530  |
| MSTRG.9657.1  | coding    | 0.333      | 0     | 225   | 1283  |
| MSTRG.9658.4  | coding    | 0.041      | 2820  | 4140  | 4658  |
| MSTRG.9661.1  | noncoding | -0.0425984 | 177   | 966   | 1177  |
| MSTRG.9662.4  | coding    | 0.386      | 609   | 1725  | 2825  |
| MSTRG.9663.3  | coding    | 0.49       | 306   | 1320  | 1636  |
| MSTRG.9663.4  | coding    | 0.49       | 504   | 1518  | 1833  |
| MSTRG.9665.1  | noncoding | -0.0679936 | 966   | 1776  | 3453  |
| MSTRG.9665.2  | noncoding | -0.0679936 | 1206  | 2016  | 3938  |
| MSTRG.9665.3  | noncoding | -0.0679936 | 963   | 1773  | 3451  |
| MSTRG.9665.5  | noncoding | -0.0323584 | 153   | 1770  | 3403  |
| MSTRG.9667.2  | coding    | 0.582      | 861   | 2148  | 4386  |
| MSTRG.9667.3  | coding    | 0.616      | 0     | 1215  | 3983  |
| MSTRG.9675.2  | coding    | 0.405      | 0     | 513   | 688   |
| MSTRG.9675.3  | coding    | 0.433      | 0     | 570   | 739   |
| MSTRG.9675.4  | coding    | 0.375      | 0     | 330   | 506   |
| MSTRG.9670.2  | coding    | 0.659      | 0     | 1662  | 3778  |
| MSTRG.9671.2  | coding    | 0.152      | 258   | 858   | 1013  |
| MSTRG.9676.2  | coding    | 0.436      | 0     | 5073  | 7608  |
| MSTRG.9676.3  | coding    | 0.416      | 447   | 1059  | 1782  |
| MSTRG.9685.1  | noncoding | -0.0131072 | 0     | 114   | 1507  |
| MSTRG.9689.1  | coding    | 0.44       | 54    | 1122  | 3011  |
| MSTRG.9689.3  | coding    | 0.456      | 21    | 1035  | 2752  |
| MSTRG.9696.2  | coding    | 0.122      | 57    | 2094  | 9125  |
| MSTRG.9696.5  | coding    | 0.116      | 339   | 2265  | 3139  |
| MSTRG.9692.1  | coding    | 0.247      | 117   | 1428  | 3016  |
| MSTRG.9693.2  | coding    | 0.409      | 0     | 354   | 1457  |
| MSTRG.9691.2  | coding    | 0.418      | 0     | 744   | 5984  |
| MSTRG.9706.1  | coding    | 0.368      | 360   | 1914  | 2456  |
| MSTRG.9706.5  | coding    | 0.357      | 138   | 1686  | 2229  |
| MSTRG.9708.1  | noncoding | -0.08192   | 162   | 726   | 1310  |
| MSTRG.9719.1  | coding    | 0.204      | 0     | 579   | 789   |
| MSTRG.9728.1  | noncoding | -0.028672  | 1536  | 1713  | 4329  |
| MSTRG.9740.1  | noncoding | -0.0356352 | 0     | 285   | 590   |
| MSTRG.9742.1  | coding    | 0.305      | 231   | 2310  | 2788  |
| MSTRG.9742.2  | coding    | 0.301      | 174   | 2265  | 2743  |
| MSTRG.9742.3  | coding    | 0.292      | 261   | 2334  | 2812  |
| MSTRG.9742.4  | coding    | 0.301      | 168   | 2268  | 2745  |
| MSTRG.9742.8  | coding    | 0.291      | 99    | 2175  | 3674  |
| MSTRG.9742.9  | coding    | 0.296      | 66    | 2121  | 2600  |
| MSTRG.9742.13 | coding    | 0.289      | 1443  | 3468  | 3947  |
| MSTRG.9742.15 | noncoding | -0.07168   | 594   | 945   | 8157  |
| MSTRG.9742.17 | coding    | 0.175      | 153   | 504   | 995   |
| MSTRG.9742.18 | coding    | 0.183      | 114   | 591   | 1669  |
| MSTRG.9743.1  | noncoding | -0.065536  | 450   | 540   | 1285  |
| MSTRG.9743.2  | coding    | 0.134      | 135   | 384   | 991   |
| MSTRG.9745.1  | coding    | 0.097      | 6     | 852   | 4452  |
| MSTRG.9745.3  | coding    | 0.061      | 3714  | 4377  | 7179  |
| MSTRG.9745.6  | coding    | 0.036      | 1845  | 3870  | 4236  |

|                 |           |             |       |       |       |
|-----------------|-----------|-------------|-------|-------|-------|
| MSTRG. 9732. 2  | coding    | 0. 142      | 531   | 783   | 3354  |
| MSTRG. 9734. 2  | noncoding | -0. 045056  | 1197  | 1296  | 1724  |
| MSTRG. 9734. 5  | noncoding | -0. 172032  | 267   | 300   | 462   |
| MSTRG. 9734. 4  | noncoding | -0. 0462848 | 459   | 480   | 662   |
| MSTRG. 9735. 1  | coding    | 0. 187      | 0     | 261   | 541   |
| MSTRG. 9738. 1  | coding    | 0. 174      | 258   | 1965  | 3166  |
| MSTRG. 9747. 1  | noncoding | -0. 323584  | 294   | 306   | 734   |
| MSTRG. 9753. 1  | noncoding | -0. 0413696 | 189   | 348   | 801   |
| MSTRG. 9756. 1  | noncoding | -0. 0380928 | 3     | 24    | 240   |
| MSTRG. 9760. 1  | coding    | 0. 154      | 150   | 813   | 1148  |
| MSTRG. 9760. 2  | coding    | 0. 15       | 150   | 795   | 950   |
| MSTRG. 9760. 3  | noncoding | -0. 0294912 | 150   | 405   | 596   |
| MSTRG. 9773. 1  | coding    | 0. 187      | 246   | 1779  | 4335  |
| MSTRG. 9774. 1  | coding    | 0. 123      | 0     | 1185  | 3883  |
| MSTRG. 9774. 2  | coding    | 0. 124      | 0     | 1182  | 2871  |
| MSTRG. 9774. 4  | coding    | 0. 126      | 0     | 1206  | 2866  |
| MSTRG. 9775. 1  | noncoding | -0. 008192  | 2604  | 2733  | 4464  |
| MSTRG. 9780. 1  | noncoding | -0. 024576  | 213   | 306   | 628   |
| MSTRG. 9798. 1  | noncoding | -0. 0004096 | 0     | 0     | 247   |
| MSTRG. 9815. 16 | noncoding | -0. 077824  | 882   | 921   | 1463  |
| MSTRG. 9815. 18 | noncoding | -0. 016384  | 13611 | 13731 | 14104 |
| MSTRG. 9815. 19 | noncoding | -0. 0180224 | 1818  | 1941  | 4246  |
| MSTRG. 9815. 20 | coding    | 0. 072      | 5784  | 6243  | 12184 |
| MSTRG. 9815. 21 | coding    | 0. 072      | 5784  | 6243  | 10165 |
| MSTRG. 9816. 1  | noncoding | -0. 114688  | 66    | 138   | 291   |
| MSTRG. 9815. 22 | noncoding | -0. 0004096 | 2520  | 2628  | 3871  |
| MSTRG. 9815. 23 | noncoding | -0. 065536  | 2616  | 2703  | 9434  |
| MSTRG. 9815. 24 | noncoding | -0. 0004096 | 150   | 294   | 1198  |
| MSTRG. 9815. 25 | noncoding | -0. 0004096 | 0     | 129   | 19800 |
| MSTRG. 9815. 26 | noncoding | -0. 028672  | 921   | 1071  | 4764  |
| MSTRG. 9815. 27 | noncoding | -0. 0167936 | 3351  | 3474  | 4613  |
| MSTRG. 9817. 1  | noncoding | -0. 0589824 | 31596 | 31842 | 36278 |
| MSTRG. 9817. 2  | noncoding | -0. 147456  | 285   | 294   | 537   |
| MSTRG. 9811. 1  | noncoding | -0. 0004096 | 0     | 0     | 450   |
| MSTRG. 9812. 2  | noncoding | -0. 0831488 | 0     | 276   | 4186  |
| MSTRG. 9814. 2  | coding    | 0. 121      | 0     | 2976  | 4649  |
| MSTRG. 9827. 1  | coding    | 0. 073      | 381   | 1575  | 2180  |
| MSTRG. 9827. 3  | noncoding | -0. 002048  | 342   | 483   | 648   |
| MSTRG. 9849. 1  | coding    | 0. 307      | 582   | 1617  | 3284  |
| MSTRG. 9854. 3  | coding    | 0. 058      | 4299  | 5379  | 11619 |
| MSTRG. 9858. 2  | noncoding | -0. 098304  | 2154  | 2445  | 2600  |
| MSTRG. 9859. 1  | coding    | 0. 114      | 1770  | 2058  | 3894  |
| MSTRG. 9859. 2  | coding    | 0. 114      | 2985  | 3273  | 4656  |
| MSTRG. 9862. 1  | noncoding | -0. 217088  | 279   | 318   | 2769  |
| MSTRG. 9863. 1  | noncoding | -0. 012288  | 1326  | 1497  | 2198  |
| MSTRG. 9878. 1  | noncoding | -0. 012288  | 183   | 336   | 2388  |
| MSTRG. 9884. 1  | noncoding | -0. 004096  | 342   | 456   | 1221  |
| MSTRG. 9889. 1  | noncoding | -0. 036864  | 2043  | 2130  | 5289  |
| MSTRG. 9889. 2  | noncoding | -0. 0237568 | 990   | 1119  | 4037  |
| MSTRG. 9890. 3  | coding    | 0. 243      | 819   | 1704  | 1880  |
| MSTRG. 9891. 1  | coding    | 0. 32       | 156   | 1668  | 3892  |
| MSTRG. 9891. 2  | coding    | 0. 315      | 0     | 1314  | 3269  |
| MSTRG. 9891. 3  | coding    | 0. 315      | 0     | 1314  | 3225  |
| MSTRG. 9891. 4  | coding    | 0. 338      | 0     | 1380  | 3289  |



|                 |           |             |      |      |      |
|-----------------|-----------|-------------|------|------|------|
| MSTRG. 9891. 6  | coding    | 0. 316      | 0    | 1317 | 3272 |
| MSTRG. 9891. 7  | coding    | 0. 316      | 0    | 1317 | 3228 |
| MSTRG. 9891. 8  | coding    | 0. 315      | 0    | 1314 | 3199 |
| MSTRG. 9891. 9  | coding    | 0. 315      | 0    | 1314 | 3102 |
| MSTRG. 9891. 10 | coding    | 0. 338      | 0    | 1383 | 3139 |
| MSTRG. 9891. 11 | coding    | 0. 338      | 0    | 1383 | 3165 |
| MSTRG. 9893. 1  | noncoding | -0. 2048    | 267  | 315  | 468  |
| MSTRG. 9894. 1  | coding    | 0. 471      | 0    | 2718 | 2900 |
| MSTRG. 9894. 2  | coding    | 0. 478      | 0    | 2760 | 2943 |
| MSTRG. 9894. 3  | coding    | 0. 49       | 0    | 2496 | 2679 |
| MSTRG. 9898. 1  | noncoding | -0. 0262144 | 18   | 381  | 647  |
| MSTRG. 9898. 2  | noncoding | -0. 0479232 | 69   | 357  | 636  |
| MSTRG. 9902. 6  | coding    | 0. 106      | 24   | 1884 | 2220 |
| MSTRG. 9902. 5  | coding    | 0. 134      | 135  | 2040 | 2375 |
| MSTRG. 9902. 9  | noncoding | -0. 0270336 | 4251 | 4665 | 4998 |
| MSTRG. 9902. 8  | coding    | 0. 138      | 63   | 1422 | 1755 |
| MSTRG. 9902. 10 | coding    | 0. 151      | 0    | 1383 | 1686 |
| MSTRG. 9902. 11 | coding    | 0. 176      | 0    | 867  | 1170 |
| MSTRG. 9899. 3  | coding    | 0. 205      | 9    | 636  | 2158 |
| MSTRG. 9899. 4  | coding    | 0. 155      | 195  | 540  | 2061 |
| MSTRG. 9899. 5  | coding    | 0. 398      | 0    | 291  | 2183 |
| MSTRG. 9906. 2  | coding    | 0. 138      | 4293 | 7707 | 9366 |
| MSTRG. 9913. 2  | coding    | 0. 327      | 387  | 2115 | 2270 |
| MSTRG. 9913. 6  | coding    | 0. 349      | 564  | 1257 | 1594 |
| MSTRG. 9915. 2  | coding    | 0. 453      | 90   | 2271 | 2448 |
| MSTRG. 9918. 1  | noncoding | -0. 057344  | 234  | 468  | 625  |
| MSTRG. 9919. 2  | coding    | 0. 387      | 0    | 969  | 1518 |
| MSTRG. 9919. 3  | coding    | 0. 416      | 33   | 891  | 1455 |
| MSTRG. 9919. 4  | coding    | 0. 267      | 462  | 1413 | 1962 |
| MSTRG. 9924. 3  | coding    | 0. 352      | 51   | 1083 | 1698 |
| MSTRG. 9929. 1  | coding    | 0. 053      | 618  | 840  | 3319 |
| MSTRG. 9929. 6  | coding    | 0. 053      | 699  | 921  | 2320 |
| MSTRG. 9929. 5  | coding    | 0. 088      | 612  | 744  | 2142 |
| MSTRG. 9934. 3  | coding    | 0. 43       | 714  | 2064 | 3167 |
| MSTRG. 9941. 2  | coding    | 0. 518      | 0    | 1440 | 1894 |
| MSTRG. 9944. 1  | coding    | 0. 265      | 363  | 1596 | 4973 |
| MSTRG. 9944. 2  | coding    | 0. 257      | 54   | 900  | 3660 |
| MSTRG. 9944. 3  | coding    | 0. 308      | 0    | 1122 | 1937 |
| MSTRG. 9948. 1  | noncoding | -0. 0098304 | 1578 | 1773 | 2131 |
| MSTRG. 9961. 1  | noncoding | -0. 024576  | 228  | 351  | 508  |
| MSTRG. 9962. 3  | coding    | 0. 487      | 795  | 1920 | 3487 |
| MSTRG. 9962. 4  | coding    | 0. 487      | 645  | 1770 | 3328 |
| MSTRG. 9963. 2  | coding    | 0. 299      | 1059 | 2433 | 4092 |
| MSTRG. 9960. 1  | noncoding | -0. 0770048 | 309  | 552  | 1375 |
| MSTRG. 9972. 3  | coding    | 0. 457      | 108  | 1134 | 2182 |
| MSTRG. 9972. 4  | coding    | 0. 475      | 339  | 1923 | 2972 |
| MSTRG. 9974. 1  | noncoding | -0. 004096  | 231  | 366  | 522  |
| MSTRG. 9977. 1  | noncoding | -0. 0360448 | 159  | 660  | 2871 |
| MSTRG. 9977. 2  | noncoding | -0. 024576  | 780  | 975  | 1286 |
| MSTRG. 9984. 1  | coding    | 0. 539      | 0    | 3567 | 5234 |
| MSTRG. 9984. 2  | coding    | 0. 539      | 0    | 3567 | 5678 |
| MSTRG. 9985. 2  | coding    | 0. 41       | 0    | 1020 | 1242 |
| MSTRG. 9986. 1  | coding    | 0. 288      | 0    | 900  | 1908 |
| MSTRG. 9986. 3  | coding    | 0. 41       | 0    | 510  | 2022 |

|                  |           |             |      |      |       |
|------------------|-----------|-------------|------|------|-------|
| MSTRG. 9987. 3   | coding    | 0. 472      | 633  | 1896 | 3387  |
| MSTRG. 9987. 4   | coding    | 0. 502      | 537  | 1932 | 3425  |
| MSTRG. 9990. 1   | noncoding | -0. 0086016 | 147  | 177  | 333   |
| MSTRG. 9993. 2   | coding    | 0. 394      | 48   | 2361 | 2518  |
| MSTRG. 9994. 1   | coding    | 0. 327      | 0    | 1023 | 1185  |
| MSTRG. 9997. 1   | coding    | 0. 477      | 495  | 1389 | 1721  |
| MSTRG. 9997. 2   | coding    | 0. 477      | 237  | 1131 | 1502  |
| MSTRG. 9997. 3   | coding    | 0. 524      | 210  | 2040 | 2915  |
| MSTRG. 9997. 4   | coding    | 0. 48       | 1251 | 2295 | 3169  |
| MSTRG. 9997. 5   | coding    | 0. 506      | 0    | 1071 | 1352  |
| MSTRG. 10000. 1  | coding    | 0. 468      | 0    | 888  | 1154  |
| MSTRG. 10001. 1  | coding    | 0. 532      | 0    | 1761 | 2520  |
| MSTRG. 10001. 4  | coding    | 0. 554      | 0    | 1587 | 1968  |
| MSTRG. 10002. 1  | coding    | 0. 309      | 1407 | 2283 | 3107  |
| MSTRG. 10005. 2  | coding    | 0. 441      | 1668 | 2607 | 3161  |
| MSTRG. 10005. 1  | coding    | 0. 467      | 1497 | 2352 | 2905  |
| MSTRG. 10008. 4  | coding    | 0. 535      | 5313 | 7335 | 8009  |
| MSTRG. 10009. 2  | coding    | 0. 343      | 0    | 2097 | 4950  |
| MSTRG. 10011. 1  | coding    | 0. 346      | 39   | 489  | 949   |
| MSTRG. 10012. 2  | coding    | 0. 442      | 348  | 1851 | 3207  |
| MSTRG. 10012. 3  | coding    | 0. 442      | 345  | 1848 | 3717  |
| MSTRG. 10012. 4  | coding    | 0. 426      | 327  | 1956 | 3313  |
| MSTRG. 10013. 1  | noncoding | -0. 0417792 | 186  | 540  | 694   |
| MSTRG. 10014. 1  | coding    | 0. 304      | 72   | 591  | 2227  |
| MSTRG. 10014. 3  | coding    | 0. 304      | 3    | 522  | 2614  |
| MSTRG. 10016. 1  | coding    | 0. 475      | 51   | 693  | 2112  |
| MSTRG. 10020. 4  | coding    | 0. 31       | 0    | 1074 | 1327  |
| MSTRG. 10026. 10 | coding    | 0. 457      | 0    | 1983 | 2456  |
| MSTRG. 10026. 13 | coding    | 0. 502      | 0    | 1176 | 1627  |
| MSTRG. 10026. 11 | coding    | 0. 51       | 0    | 1812 | 1966  |
| MSTRG. 10026. 12 | coding    | 0. 508      | 0    | 1815 | 1969  |
| MSTRG. 10026. 18 | coding    | 0. 504      | 0    | 1824 | 1979  |
| MSTRG. 10024. 2  | coding    | 0. 374      | 243  | 1092 | 3349  |
| MSTRG. 10024. 3  | coding    | 0. 394      | 243  | 1038 | 3295  |
| MSTRG. 10025. 1  | noncoding | -0. 0004096 | 0    | 0    | 531   |
| MSTRG. 10031. 1  | noncoding | -0. 0626688 | 402  | 774  | 1170  |
| MSTRG. 10041. 2  | coding    | 0. 446      | 138  | 4464 | 4753  |
| MSTRG. 10041. 3  | coding    | 0. 474      | 1125 | 4395 | 4683  |
| MSTRG. 10041. 7  | coding    | 0. 454      | 0    | 4350 | 4586  |
| MSTRG. 10042. 1  | noncoding | -0. 0344064 | 618  | 999  | 1600  |
| MSTRG. 10043. 2  | coding    | 0. 427      | 0    | 3678 | 4476  |
| MSTRG. 10043. 5  | coding    | 0. 426      | 759  | 4113 | 4269  |
| MSTRG. 10043. 6  | coding    | 0. 427      | 777  | 4059 | 4213  |
| MSTRG. 10045. 2  | noncoding | -0. 086016  | 1890 | 2502 | 2657  |
| MSTRG. 10037. 3  | coding    | 0. 493      | 0    | 1221 | 2345  |
| MSTRG. 10038. 1  | noncoding | -0. 0516096 | 93   | 738  | 4682  |
| MSTRG. 10038. 2  | noncoding | -0. 0495616 | 93   | 1392 | 1904  |
| MSTRG. 10049. 1  | noncoding | -0. 0380928 | 2355 | 2823 | 2978  |
| MSTRG. 10050. 2  | coding    | 0. 482      | 0    | 96   | 703   |
| MSTRG. 10052. 2  | coding    | 0. 105      | 2640 | 4929 | 10686 |
| MSTRG. 10053. 1  | coding    | 0. 088      | 399  | 870  | 1559  |
| MSTRG. 10051. 2  | noncoding | -0. 0905216 | 0    | 156  | 637   |
| MSTRG. 10058. 1  | noncoding | -0. 012288  | 3312 | 3411 | 3609  |
| MSTRG. 10060. 1  | coding    | 0. 405      | 384  | 2706 | 4786  |

|                |           |            |      |       |       |
|----------------|-----------|------------|------|-------|-------|
| MSTRG.10078.4  | coding    | 0.117      | 2175 | 2391  | 3578  |
| MSTRG.10078.5  | coding    | 0.117      | 2298 | 2514  | 3702  |
| MSTRG.10078.3  | coding    | 0.038      | 516  | 1215  | 4343  |
| MSTRG.10079.1  | noncoding | -0.0458752 | 7920 | 8277  | 8499  |
| MSTRG.10079.2  | noncoding | -0.028672  | 87   | 204   | 723   |
| MSTRG.10079.3  | noncoding | -0.045056  | 606  | 666   | 820   |
| MSTRG.10082.2  | coding    | 0.097      | 189  | 384   | 3852  |
| MSTRG.10087.3  | coding    | 0.1        | 120  | 2055  | 2359  |
| MSTRG.10091.1  | coding    | 0.445      | 666  | 1554  | 1709  |
| MSTRG.10091.2  | coding    | 0.445      | 621  | 1509  | 1663  |
| MSTRG.10091.3  | coding    | 0.446      | 39   | 912   | 1067  |
| MSTRG.10092.1  | noncoding | -0.0651264 | 489  | 681   | 1187  |
| MSTRG.10094.8  | coding    | 0.403      | 141  | 1323  | 1816  |
| MSTRG.10094.6  | coding    | 0.401      | 177  | 1401  | 1895  |
| MSTRG.10094.7  | coding    | 0.4        | 213  | 1428  | 1920  |
| MSTRG.10094.9  | coding    | 0.402      | 141  | 1320  | 1807  |
| MSTRG.10094.10 | coding    | 0.399      | 186  | 1407  | 1869  |
| MSTRG.10094.11 | coding    | 0.399      | 354  | 1575  | 2038  |
| MSTRG.10100.1  | noncoding | -0.0425984 | 33   | 294   | 964   |
| MSTRG.10100.2  | noncoding | -0.0557056 | 0    | 96    | 766   |
| MSTRG.10101.1  | noncoding | -0.0720896 | 117  | 678   | 898   |
| MSTRG.10101.3  | noncoding | -0.0507904 | 426  | 648   | 909   |
| MSTRG.10104.2  | noncoding | -0.0217088 | 9567 | 9975  | 13849 |
| MSTRG.10105.2  | noncoding | -0.0319488 | 0    | 210   | 3218  |
| MSTRG.10107.1  | coding    | 0.452      | 8739 | 10620 | 11339 |
| MSTRG.10102.2  | noncoding | -0.02048   | 1962 | 2151  | 7489  |
| MSTRG.10103.1  | noncoding | -0.0434176 | 354  | 501   | 1101  |
| MSTRG.10121.1  | coding    | 0.343      | 1287 | 3147  | 7841  |
| MSTRG.10121.3  | coding    | 0.342      | 1620 | 3357  | 7955  |
| MSTRG.10121.4  | coding    | 0.109      | 2637 | 2925  | 3190  |
| MSTRG.10122.1  | coding    | 0.072      | 1704 | 3600  | 4192  |
| MSTRG.10122.2  | coding    | 0.072      | 1620 | 3516  | 3985  |
| MSTRG.10122.3  | coding    | 0.074      | 1326 | 3225  | 3703  |
| MSTRG.10122.4  | coding    | 0.052      | 2028 | 3318  | 3797  |
| MSTRG.10123.1  | noncoding | -0.0004096 | 2199 | 2391  | 8867  |
| MSTRG.10122.5  | coding    | 0.065      | 732  | 2115  | 2586  |
| MSTRG.10122.6  | coding    | 0.071      | 312  | 1446  | 2417  |
| MSTRG.10122.7  | coding    | 0.054      | 663  | 1956  | 2426  |
| MSTRG.10122.8  | coding    | 0.072      | 144  | 1785  | 2256  |
| MSTRG.10133.9  | noncoding | -0.012288  | 72   | 180   | 3905  |
| MSTRG.10133.3  | coding    | 0.067      | 372  | 2922  | 4689  |
| MSTRG.10133.6  | coding    | 0.066      | 5526 | 8172  | 9938  |
| MSTRG.10133.5  | coding    | 0.065      | 6777 | 9393  | 11159 |
| MSTRG.10133.11 | coding    | 0.072      | 372  | 3018  | 3436  |
| MSTRG.10133.12 | coding    | 0.067      | 6633 | 9183  | 9585  |
| MSTRG.10112.2  | noncoding | -0.032768  | 93   | 183   | 398   |
| MSTRG.10112.3  | coding    | 0.217      | 180  | 3573  | 4954  |
| MSTRG.10112.4  | coding    | 0.208      | 180  | 3828  | 4541  |
| MSTRG.10112.5  | coding    | 0.203      | 180  | 4047  | 4672  |
| MSTRG.10112.10 | coding    | 0.205      | 180  | 3045  | 3653  |
| MSTRG.10112.11 | coding    | 0.219      | 423  | 2970  | 3578  |
| MSTRG.10112.12 | coding    | 0.212      | 180  | 2826  | 3164  |
| MSTRG.10115.4  | coding    | 0.141      | 381  | 1554  | 2425  |
| MSTRG.10115.3  | coding    | 0.141      | 645  | 1818  | 2690  |

|                |           |            |      |      |       |
|----------------|-----------|------------|------|------|-------|
| MSTRG.10115.5  | noncoding | -0.0212992 | 309  | 534  | 1224  |
| MSTRG.10116.2  | noncoding | -0.0712704 | 819  | 1959 | 4722  |
| MSTRG.10134.1  | noncoding | -0.0462848 | 0    | 207  | 1505  |
| MSTRG.10138.3  | noncoding | -0.004096  | 111  | 159  | 313   |
| MSTRG.10138.2  | coding    | 0.334      | 231  | 2886 | 3591  |
| MSTRG.10139.1  | noncoding | -0.028672  | 1524 | 1608 | 5083  |
| MSTRG.10138.7  | coding    | 0.362      | 663  | 2457 | 3161  |
| MSTRG.10142.1  | noncoding | -0.131072  | 1113 | 1161 | 2050  |
| MSTRG.10146.6  | coding    | 0.422      | 213  | 1563 | 1797  |
| MSTRG.10146.5  | coding    | 0.429      | 429  | 1761 | 1994  |
| MSTRG.10147.1  | noncoding | -0.02048   | 963  | 1047 | 1969  |
| MSTRG.10148.1  | coding    | 0.087      | 678  | 2754 | 4006  |
| MSTRG.10148.2  | coding    | 0.092      | 675  | 2844 | 4612  |
| MSTRG.10148.3  | coding    | 0.099      | 663  | 2883 | 4135  |
| MSTRG.10148.7  | coding    | 0.099      | 456  | 2676 | 3928  |
| MSTRG.10148.9  | coding    | 0.099      | 708  | 2928 | 4180  |
| MSTRG.10148.8  | coding    | 0.099      | 477  | 2697 | 4967  |
| MSTRG.10148.6  | coding    | 0.087      | 477  | 2553 | 10450 |
| MSTRG.10148.4  | coding    | 0.099      | 477  | 2697 | 7953  |
| MSTRG.10143.2  | coding    | 0.403      | 0    | 444  | 760   |
| MSTRG.10143.3  | coding    | 0.414      | 0    | 543  | 979   |
| MSTRG.10155.1  | noncoding | -0.0499712 | 0    | 456  | 611   |
| MSTRG.10159.1  | coding    | 0.451      | 882  | 3192 | 5098  |
| MSTRG.10160.1  | coding    | 0.434      | 0    | 1953 | 3172  |
| MSTRG.10162.1  | noncoding | -0.0782336 | 90   | 120  | 744   |
| MSTRG.10172.2  | noncoding | -0.034816  | 243  | 447  | 749   |
| MSTRG.10172.5  | coding    | 0.581      | 0    | 1266 | 5665  |
| MSTRG.10172.6  | noncoding | -0.0106496 | 525  | 708  | 863   |
| MSTRG.10173.1  | noncoding | -0.024576  | 66   | 171  | 2906  |
| MSTRG.10173.2  | noncoding | -0.192512  | 162  | 189  | 2083  |
| MSTRG.10172.8  | noncoding | -0.0462848 | 156  | 483  | 697   |
| MSTRG.10172.9  | noncoding | -0.0487424 | 306  | 603  | 1127  |
| MSTRG.10172.10 | noncoding | -0.034816  | 30   | 324  | 580   |
| MSTRG.10172.11 | coding    | 0.2        | 0    | 345  | 870   |
| MSTRG.10175.1  | coding    | 0.145      | 0    | 312  | 4985  |
| MSTRG.10175.2  | noncoding | -0.0536576 | 6201 | 7014 | 11334 |
| MSTRG.10175.3  | coding    | 0.212      | 0    | 348  | 1882  |
| MSTRG.10175.4  | coding    | 0.145      | 0    | 312  | 728   |
| MSTRG.10175.5  | coding    | 0.145      | 0    | 312  | 1089  |
| MSTRG.10178.6  | coding    | 0.108      | 0    | 4281 | 7482  |
| MSTRG.10178.15 | coding    | 0.13       | 0    | 2229 | 8245  |
| MSTRG.10178.7  | coding    | 0.072      | 0    | 7782 | 8267  |
| MSTRG.10178.8  | coding    | 0.108      | 0    | 4281 | 7628  |
| MSTRG.10178.12 | coding    | 0.125      | 0    | 2787 | 8197  |
| MSTRG.10178.11 | coding    | 0.132      | 0    | 2844 | 8851  |
| MSTRG.10178.9  | coding    | 0.107      | 0    | 5040 | 8725  |
| MSTRG.10178.13 | coding    | 0.125      | 0    | 2781 | 9402  |
| MSTRG.10178.1  | coding    | 0.107      | 0    | 5040 | 9485  |
| MSTRG.10178.14 | coding    | 0.111      | 0    | 5097 | 9397  |
| MSTRG.10178.16 | coding    | 0.107      | 0    | 5040 | 13864 |
| MSTRG.10178.3  | coding    | 0.111      | 0    | 5097 | 13972 |
| MSTRG.10178.10 | coding    | 0.107      | 0    | 5040 | 12117 |
| MSTRG.10178.5  | coding    | 0.125      | 0    | 2787 | 13917 |
| MSTRG.10178.17 | coding    | 0.083      | 504  | 5118 | 9564  |

|                |           |            |       |       |       |
|----------------|-----------|------------|-------|-------|-------|
| MSTRG.10178.18 | coding    | 0.081      | 177   | 4809  | 9510  |
| MSTRG.10178.19 | coding    | 0.043      | 1254  | 6639  | 7125  |
| MSTRG.10178.20 | coding    | 0.089      | 1254  | 3954  | 7251  |
| MSTRG.10178.21 | coding    | 0.089      | 1254  | 3954  | 12830 |
| MSTRG.10178.22 | coding    | 0.091      | 801   | 2898  | 7529  |
| MSTRG.10178.24 | coding    | 0.086      | 1236  | 3936  | 7285  |
| MSTRG.10178.23 | coding    | 0.087      | 174   | 2841  | 7285  |
| MSTRG.10180.2  | coding    | 0.276      | 816   | 1557  | 3679  |
| MSTRG.10164.2  | coding    | 0.18       | 594   | 1464  | 1923  |
| MSTRG.10164.1  | coding    | 0.264      | 0     | 1875  | 2507  |
| MSTRG.10164.3  | coding    | 0.142      | 192   | 1476  | 1934  |
| MSTRG.10183.4  | coding    | 0.294      | 81    | 618   | 3320  |
| MSTRG.10184.1  | noncoding | -0.0405504 | 2043  | 2097  | 3567  |
| MSTRG.10185.1  | noncoding | -0.0421888 | 0     | 114   | 684   |
| MSTRG.10195.1  | noncoding | -0.0557056 | 147   | 354   | 1377  |
| MSTRG.10198.1  | coding    | 0.257      | 84    | 2208  | 3340  |
| MSTRG.10197.5  | noncoding | -0.0004096 | 678   | 816   | 1081  |
| MSTRG.10197.6  | noncoding | -0.1859584 | 0     | 420   | 2360  |
| MSTRG.10208.1  | noncoding | -0.0180224 | 10125 | 10263 | 13561 |
| MSTRG.10209.1  | coding    | 0.177      | 0     | 270   | 1210  |
| MSTRG.10197.7  | noncoding | -0.1695744 | 3204  | 4041  | 4428  |
| MSTRG.10197.8  | noncoding | -0.098304  | 279   | 330   | 798   |
| MSTRG.10197.9  | noncoding | -0.1712128 | 627   | 1440  | 1596  |
| MSTRG.10213.1  | noncoding | -0.1462272 | 465   | 1455  | 4194  |
| MSTRG.10214.1  | noncoding | -0.02048   | 609   | 717   | 1122  |
| MSTRG.10215.1  | noncoding | -0.186368  | 0     | 120   | 957   |
| MSTRG.10230.1  | noncoding | -0.016384  | 1815  | 1977  | 3238  |
| MSTRG.10231.1  | coding    | 0.307      | 3552  | 6585  | 8229  |
| MSTRG.10231.2  | coding    | 0.311      | 24    | 3060  | 4702  |
| MSTRG.10232.1  | noncoding | -0.1097728 | 0     | 93    | 249   |
| MSTRG.10234.1  | coding    | 0.055      | 234   | 1716  | 2035  |
| MSTRG.10234.2  | noncoding | -0.0782336 | 0     | 528   | 2167  |
| MSTRG.10231.4  | coding    | 0.303      | 309   | 3543  | 5186  |
| MSTRG.10234.3  | noncoding | -0.077824  | 477   | 552   | 1025  |
| MSTRG.10235.1  | noncoding | -0.008192  | 1878  | 1989  | 2146  |
| MSTRG.10231.9  | coding    | 0.312      | 99    | 3072  | 4716  |
| MSTRG.10236.1  | noncoding | -0.1335296 | 4143  | 4611  | 4768  |
| MSTRG.10231.12 | coding    | 0.326      | 303   | 3285  | 4929  |
| MSTRG.10231.16 | coding    | 0.33       | 4860  | 7182  | 7459  |
| MSTRG.10231.15 | coding    | 0.333      | 4860  | 7794  | 9437  |
| MSTRG.10231.18 | coding    | 0.33       | 3384  | 5706  | 5983  |
| MSTRG.10231.19 | coding    | 0.309      | 3423  | 4173  | 4326  |
| MSTRG.10237.1  | noncoding | -0.0249856 | 2220  | 2367  | 4934  |
| MSTRG.10238.1  | coding    | 0.166      | 4539  | 4725  | 5164  |
| MSTRG.10239.3  | coding    | 0.294      | 51    | 3945  | 5492  |
| MSTRG.10239.4  | coding    | 0.31       | 0     | 4101  | 5648  |
| MSTRG.10222.1  | noncoding | -0.0684032 | 627   | 1041  | 6273  |
| MSTRG.10219.1  | noncoding | -0.0217088 | 0     | 54    | 262   |
| MSTRG.10219.2  | noncoding | -0.0217088 | 0     | 54    | 374   |
| MSTRG.10219.3  | noncoding | -0.0217088 | 0     | 54    | 318   |
| MSTRG.10243.7  | coding    | 0.158      | 213   | 1398  | 6884  |
| MSTRG.10243.8  | coding    | 0.16       | 2028  | 3198  | 8910  |
| MSTRG.10255.1  | noncoding | -0.0004096 | 0     | 0     | 463   |
| MSTRG.10256.3  | coding    | 0.324      | 0     | 1428  | 5088  |

|               |           |            |       |       |       |
|---------------|-----------|------------|-------|-------|-------|
| MSTRG.10259.1 | noncoding | -0.075776  | 7845  | 8178  | 10772 |
| MSTRG.10260.1 | noncoding | -0.0004096 | 228   | 387   | 8119  |
| MSTRG.10261.1 | noncoding | -0.0679936 | 1626  | 1707  | 2742  |
| MSTRG.10266.2 | coding    | 0.103      | 270   | 1380  | 2974  |
| MSTRG.10268.1 | noncoding | -0.0004096 | 0     | 0     | 548   |
| MSTRG.10270.1 | noncoding | -0.0004096 | 0     | 0     | 276   |
| MSTRG.10273.2 | coding    | 0.255      | 0     | 1095  | 1367  |
| MSTRG.10273.4 | coding    | 0.256      | 162   | 900   | 1171  |
| MSTRG.10273.3 | coding    | 0.25       | 87    | 822   | 1424  |
| MSTRG.10273.5 | coding    | 0.256      | 183   | 921   | 1121  |
| MSTRG.10275.1 | noncoding | -0.0004096 | 834   | 843   | 997   |
| MSTRG.10278.2 | coding    | 0.076      | 69    | 3237  | 6314  |
| MSTRG.10281.7 | coding    | 0.12       | 0     | 3087  | 3241  |
| MSTRG.10281.9 | coding    | 0.117      | 0     | 3216  | 3735  |
| MSTRG.10281.6 | coding    | 0.112      | 0     | 3207  | 4219  |
| MSTRG.10281.4 | coding    | 0.116      | 0     | 3222  | 4245  |
| MSTRG.10281.5 | coding    | 0.132      | 0     | 3126  | 4149  |
| MSTRG.10281.8 | coding    | 0.116      | 0     | 3285  | 4308  |
| MSTRG.10282.2 | coding    | 0.274      | 108   | 936   | 1528  |
| MSTRG.10282.3 | coding    | 0.278      | 696   | 1854  | 2432  |
| MSTRG.10282.4 | coding    | 0.287      | 351   | 1506  | 2023  |
| MSTRG.10284.1 | coding    | 0.477      | 0     | 2013  | 4977  |
| MSTRG.10284.4 | coding    | 0.441      | 0     | 1644  | 2080  |
| MSTRG.10290.1 | noncoding | -0.049152  | 999   | 1050  | 1204  |
| MSTRG.10290.2 | noncoding | -0.016384  | 1125  | 1221  | 2820  |
| MSTRG.10302.4 | coding    | 0.199      | 1593  | 4035  | 4528  |
| MSTRG.10305.1 | coding    | 0.268      | 0     | 3699  | 19064 |
| MSTRG.10305.2 | noncoding | -0.0004096 | 2877  | 2994  | 5882  |
| MSTRG.10306.1 | noncoding | -0.0004096 | 0     | 0     | 425   |
| MSTRG.10319.2 | coding    | 0.088      | 0     | 2055  | 7856  |
| MSTRG.10322.2 | coding    | 0.191      | 3657  | 4227  | 5525  |
| MSTRG.10322.1 | coding    | 0.191      | 699   | 1269  | 2569  |
| MSTRG.10317.1 | noncoding | -0.016384  | 0     | 27    | 415   |
| MSTRG.10326.3 | coding    | 0.428      | 42    | 756   | 1518  |
| MSTRG.10330.3 | coding    | 0.224      | 147   | 540   | 703   |
| MSTRG.10331.1 | coding    | 0.523      | 735   | 3435  | 4667  |
| MSTRG.10331.2 | coding    | 0.41       | 1305  | 4764  | 5996  |
| MSTRG.10329.3 | coding    | 0.353      | 2040  | 4518  | 12507 |
| MSTRG.10343.1 | coding    | 0.209      | 7335  | 8796  | 12577 |
| MSTRG.10344.1 | noncoding | -0.014336  | 879   | 1047  | 1371  |
| MSTRG.10343.4 | coding    | 0.235      | 381   | 1551  | 3966  |
| MSTRG.10343.5 | coding    | 0.209      | 10617 | 12078 | 12695 |
| MSTRG.10335.1 | coding    | 0.51       | 546   | 1965  | 2554  |
| MSTRG.10335.3 | coding    | 0.51       | 375   | 1794  | 2382  |
| MSTRG.10336.2 | coding    | 0.535      | 0     | 2064  | 2464  |
| MSTRG.10337.1 | noncoding | -0.0724992 | 0     | 153   | 331   |
| MSTRG.10341.2 | coding    | 0.207      | 168   | 1428  | 2198  |
| MSTRG.10341.3 | coding    | 0.28       | 153   | 852   | 1059  |
| MSTRG.10342.1 | noncoding | -0.0466944 | 249   | 345   | 693   |
| MSTRG.10350.1 | coding    | 0.377      | 0     | 1443  | 5701  |
| MSTRG.10351.1 | coding    | 0.363      | 9     | 3918  | 5292  |
| MSTRG.10351.2 | coding    | 0.342      | 9     | 4005  | 5377  |
| MSTRG.10351.3 | coding    | 0.309      | 0     | 8634  | 9775  |
| MSTRG.10356.3 | coding    | 0.159      | 498   | 1521  | 1872  |

|                  |           |             |       |       |       |
|------------------|-----------|-------------|-------|-------|-------|
| MSTRG. 10356. 4  | coding    | 0. 218      | 0     | 1317  | 1684  |
| MSTRG. 10362. 2  | coding    | 0. 215      | 534   | 792   | 1382  |
| MSTRG. 10366. 2  | coding    | 0. 143      | 135   | 1335  | 2236  |
| MSTRG. 10370. 2  | coding    | 0. 453      | 0     | 1026  | 1943  |
| MSTRG. 10370. 3  | coding    | 0. 36       | 1275  | 1890  | 5627  |
| MSTRG. 10373. 3  | coding    | 0. 357      | 1515  | 4242  | 7640  |
| MSTRG. 10373. 2  | coding    | 0. 374      | 0     | 3483  | 8269  |
| MSTRG. 10373. 5  | coding    | 0. 135      | 13692 | 14367 | 14684 |
| MSTRG. 10374. 1  | noncoding | -0. 0475136 | 1587  | 1833  | 2789  |
| MSTRG. 10375. 1  | coding    | 0. 062      | 0     | 987   | 1156  |
| MSTRG. 10377. 1  | noncoding | -0. 0004096 | 0     | 0     | 249   |
| MSTRG. 10379. 1  | noncoding | -0. 0487424 | 0     | 15    | 246   |
| MSTRG. 10372. 1  | noncoding | -0. 0045056 | 4359  | 4668  | 5914  |
| MSTRG. 10372. 2  | noncoding | -0. 0045056 | 2562  | 2871  | 3549  |
| MSTRG. 10437. 2  | coding    | 0. 169      | 1800  | 2556  | 5515  |
| MSTRG. 10437. 3  | coding    | 0. 169      | 879   | 1635  | 10034 |
| MSTRG. 10437. 4  | noncoding | -0. 0360448 | 5271  | 5595  | 6047  |
| MSTRG. 10437. 5  | coding    | 0. 146      | 474   | 945   | 7309  |
| MSTRG. 10437. 7  | noncoding | -0. 0049152 | 393   | 588   | 1281  |
| MSTRG. 10437. 6  | noncoding | -0. 0118784 | 7164  | 7248  | 9005  |
| MSTRG. 10437. 8  | coding    | 0. 169      | 20154 | 20910 | 21390 |
| MSTRG. 10437. 9  | coding    | 0. 169      | 735   | 1491  | 5585  |
| MSTRG. 10437. 10 | noncoding | -0. 0118784 | 4326  | 4410  | 6216  |
| MSTRG. 10437. 11 | noncoding | -0. 0135168 | 2277  | 2316  | 4189  |
| MSTRG. 10437. 12 | coding    | 0. 053      | 19767 | 20880 | 52618 |
| MSTRG. 10437. 13 | coding    | 0. 053      | 19488 | 20601 | 37827 |
| MSTRG. 10437. 14 | coding    | 0. 169      | 16104 | 16860 | 20955 |
| MSTRG. 10437. 15 | coding    | 0. 15       | 7503  | 7968  | 12874 |
| MSTRG. 10437. 16 | coding    | 0. 065      | 22773 | 23067 | 27092 |
| MSTRG. 10437. 17 | noncoding | -0. 08192   | 2364  | 2466  | 9419  |
| MSTRG. 10439. 1  | noncoding | -0. 0004096 | 972   | 972   | 2606  |
| MSTRG. 10437. 18 | coding    | 0. 067      | 12432 | 13176 | 14501 |
| MSTRG. 10440. 1  | noncoding | -0. 0188416 | 2919  | 3087  | 4713  |
| MSTRG. 10437. 19 | coding    | 0. 076      | 930   | 1560  | 13019 |
| MSTRG. 10437. 20 | noncoding | -0. 0135168 | 4773  | 4905  | 6143  |
| MSTRG. 10441. 1  | coding    | 0. 01       | 6972  | 7554  | 9486  |
| MSTRG. 10442. 1  | coding    | 0. 033      | 7554  | 8325  | 12586 |
| MSTRG. 10443. 1  | noncoding | -0. 1024    | 894   | 939   | 3694  |
| MSTRG. 10445. 1  | noncoding | -0. 004096  | 678   | 762   | 1835  |
| MSTRG. 10437. 21 | coding    | 0. 126      | 750   | 978   | 1153  |
| MSTRG. 10447. 1  | noncoding | -0. 049152  | 2145  | 2175  | 2833  |
| MSTRG. 10437. 22 | noncoding | -0. 0147456 | 4155  | 4248  | 4884  |
| MSTRG. 10381. 1  | coding    | 0. 001      | 69    | 213   | 715   |
| MSTRG. 10381. 3  | noncoding | -0. 0049152 | 129   | 258   | 475   |
| MSTRG. 10381. 4  | coding    | 0. 168      | 138   | 315   | 532   |
| MSTRG. 10381. 5  | coding    | 0. 077      | 186   | 351   | 568   |
| MSTRG. 10381. 6  | coding    | 0. 077      | 486   | 651   | 849   |
| MSTRG. 10386. 1  | noncoding | -0. 0344064 | 528   | 540   | 824   |
| MSTRG. 10391. 1  | noncoding | -0. 0507904 | 978   | 1308  | 1472  |
| MSTRG. 10383. 1  | noncoding | -0. 0872448 | 1380  | 1812  | 2605  |
| MSTRG. 10392. 1  | coding    | 0. 17       | 0     | 459   | 647   |
| MSTRG. 10399. 2  | coding    | 0. 313      | 225   | 1221  | 2509  |
| MSTRG. 10399. 3  | coding    | 0. 105      | 39    | 693   | 1150  |
| MSTRG. 10400. 1  | noncoding | -0. 0282624 | 654   | 753   | 3106  |

|                |           |            |       |       |       |
|----------------|-----------|------------|-------|-------|-------|
| MSTRG.10401.3  | coding    | 0.071      | 348   | 768   | 2189  |
| MSTRG.10410.2  | noncoding | -0.0708608 | 144   | 150   | 642   |
| MSTRG.10419.2  | coding    | 0.222      | 0     | 966   | 3306  |
| MSTRG.10419.3  | coding    | 0.222      | 579   | 1566  | 3904  |
| MSTRG.10419.4  | coding    | 0.268      | 405   | 2112  | 4450  |
| MSTRG.10420.1  | noncoding | -0.012288  | 13188 | 13329 | 27797 |
| MSTRG.10419.6  | coding    | 0.455      | 0     | 432   | 15468 |
| MSTRG.10407.1  | coding    | 0.051      | 3207  | 4302  | 4493  |
| MSTRG.10407.2  | coding    | 0.098      | 570   | 1350  | 1533  |
| MSTRG.10407.3  | noncoding | -0.02048   | 672   | 810   | 1371  |
| MSTRG.10409.1  | coding    | 0.102      | 528   | 1200  | 2592  |
| MSTRG.10470.8  | coding    | 0.428      | 924   | 1524  | 1677  |
| MSTRG.10470.10 | coding    | 0.441      | 378   | 972   | 1128  |
| MSTRG.10470.17 | coding    | 0.423      | 11565 | 12129 | 12285 |
| MSTRG.10470.18 | noncoding | -0.028672  | 168   | 216   | 1929  |
| MSTRG.10470.20 | noncoding | -0.0196608 | 2088  | 2241  | 7485  |
| MSTRG.10470.22 | coding    | 0.058      | 7554  | 8817  | 10289 |
| MSTRG.10470.23 | coding    | 0.058      | 1761  | 3024  | 24071 |
| MSTRG.10470.24 | noncoding | -0.03072   | 5886  | 5967  | 13925 |
| MSTRG.10421.2  | noncoding | -0.1093632 | 153   | 423   | 1468  |
| MSTRG.10424.2  | noncoding | -0.0344064 | 270   | 273   | 430   |
| MSTRG.10424.3  | coding    | 0.496      | 0     | 591   | 6930  |
| MSTRG.10428.1  | noncoding | -0.0004096 | 3564  | 3678  | 3964  |
| MSTRG.10427.3  | coding    | 0.329      | 75    | 558   | 5177  |
| MSTRG.10430.2  | coding    | 0.416      | 27    | 1008  | 1188  |
| MSTRG.10455.1  | coding    | 0.165      | 405   | 2493  | 3957  |
| MSTRG.10455.2  | coding    | 0.176      | 426   | 2376  | 3777  |
| MSTRG.10455.4  | coding    | 0.19       | 861   | 2550  | 3217  |
| MSTRG.10456.1  | coding    | 0.123      | 681   | 1149  | 1381  |
| MSTRG.10456.3  | coding    | 0.125      | 0     | 507   | 739   |
| MSTRG.10456.5  | coding    | 0.123      | 48    | 516   | 748   |
| MSTRG.10456.6  | coding    | 0.112      | 27    | 480   | 711   |
| MSTRG.10456.7  | coding    | 0.148      | 474   | 804   | 1037  |
| MSTRG.10456.4  | coding    | 0.123      | 0     | 504   | 5899  |
| MSTRG.10464.1  | coding    | 0.349      | 0     | 3867  | 4095  |
| MSTRG.10466.1  | noncoding | -0.0425984 | 0     | 294   | 447   |
| MSTRG.10435.2  | coding    | 0.172      | 363   | 900   | 3127  |
| MSTRG.10488.3  | coding    | 0.17       | 0     | 909   | 1301  |
| MSTRG.10488.5  | coding    | 0.17       | 0     | 909   | 2724  |
| MSTRG.10488.2  | coding    | 0.17       | 0     | 909   | 1396  |
| MSTRG.10488.4  | coding    | 0.17       | 0     | 909   | 1109  |
| MSTRG.10489.1  | noncoding | -0.0118784 | 201   | 354   | 891   |
| MSTRG.10481.1  | noncoding | -0.032768  | 0     | 24    | 219   |
| MSTRG.10491.1  | noncoding | -0.0278528 | 216   | 291   | 519   |
| MSTRG.10507.1  | coding    | 0.426      | 153   | 7887  | 9137  |
| MSTRG.10508.1  | noncoding | -0.008192  | 27    | 129   | 507   |
| MSTRG.10507.3  | coding    | 0.431      | 9     | 3126  | 3317  |
| MSTRG.10513.4  | noncoding | -0.0626688 | 1113  | 1149  | 1305  |
| MSTRG.10516.1  | noncoding | -0.0557056 | 4245  | 4701  | 4929  |
| MSTRG.10511.1  | coding    | 0.421      | 0     | 645   | 1310  |
| MSTRG.10522.3  | noncoding | -0.0630784 | 624   | 1173  | 1488  |
| MSTRG.10523.1  | noncoding | -0.0073728 | 708   | 975   | 1559  |
| MSTRG.10524.1  | noncoding | -0.0004096 | 0     | 0     | 338   |
| MSTRG.10525.1  | noncoding | -0.0524288 | 369   | 534   | 1987  |



|               |           |            |      |      |       |
|---------------|-----------|------------|------|------|-------|
| MSTRG.10526.3 | coding    | 0.065      | 225  | 786  | 1234  |
| MSTRG.10526.5 | coding    | 0.053      | 714  | 1263 | 1712  |
| MSTRG.10539.3 | noncoding | -0.079872  | 2115 | 2151 | 4467  |
| MSTRG.10539.4 | noncoding | -0.0131072 | 1533 | 1653 | 5398  |
| MSTRG.10542.1 | noncoding | -0.487424  | 321  | 351  | 1048  |
| MSTRG.10542.2 | noncoding | -0.0159744 | 4923 | 5121 | 7456  |
| MSTRG.10543.1 | noncoding | -0.151552  | 189  | 207  | 443   |
| MSTRG.10573.1 | noncoding | -0.0417792 | 0    | 135  | 446   |
| MSTRG.10577.1 | noncoding | -0.0004096 | 60   | 60   | 239   |
| MSTRG.10582.1 | noncoding | -0.1134592 | 726  | 744  | 2107  |
| MSTRG.10583.1 | noncoding | -0.012288  | 1086 | 1263 | 2200  |
| MSTRG.10584.1 | noncoding | -0.0004096 | 0    | 0    | 1810  |
| MSTRG.10590.2 | coding    | 0.084      | 549  | 840  | 1011  |
| MSTRG.10590.3 | noncoding | -0.004096  | 2628 | 2772 | 3654  |
| MSTRG.10595.3 | coding    | 0.164      | 267  | 1584 | 3494  |
| MSTRG.10595.4 | coding    | 0.187      | 738  | 1959 | 3802  |
| MSTRG.10595.5 | coding    | 0.187      | 324  | 1545 | 3387  |
| MSTRG.10595.6 | coding    | 0.187      | 864  | 2085 | 3085  |
| MSTRG.10595.7 | coding    | 0.164      | 264  | 1581 | 2579  |
| MSTRG.10604.1 | noncoding | -0.0004096 | 0    | 0    | 366   |
| MSTRG.10633.2 | coding    | 0.103      | 51   | 1329 | 4261  |
| MSTRG.10634.1 | noncoding | -0.0905216 | 0    | 6    | 1088  |
| MSTRG.10635.1 | noncoding | -0.0049152 | 4086 | 4233 | 5796  |
| MSTRG.10633.3 | noncoding | -0.045056  | 2823 | 2934 | 3597  |
| MSTRG.10633.4 | coding    | 0.086      | 54   | 1029 | 7406  |
| MSTRG.10633.5 | coding    | 0.042      | 180  | 459  | 8181  |
| MSTRG.10636.1 | noncoding | -0.036864  | 249  | 297  | 497   |
| MSTRG.10640.1 | noncoding | -0.106496  | 2559 | 2649 | 5382  |
| MSTRG.10641.1 | noncoding | -0.0004096 | 366  | 456  | 1206  |
| MSTRG.10639.2 | coding    | 0.061      | 1626 | 3978 | 5691  |
| MSTRG.10642.2 | coding    | 0.06       | 489  | 768  | 3018  |
| MSTRG.10643.1 | coding    | 0.01       | 264  | 408  | 817   |
| MSTRG.10642.3 | noncoding | -0.01024   | 279  | 486  | 1376  |
| MSTRG.10623.2 | coding    | 0.158      | 291  | 969  | 1270  |
| MSTRG.10623.3 | coding    | 0.158      | 183  | 861  | 1160  |
| MSTRG.10626.2 | coding    | 0.069      | 483  | 4314 | 5246  |
| MSTRG.10629.2 | coding    | 0.029      | 597  | 774  | 1110  |
| MSTRG.10629.3 | coding    | 0.029      | 555  | 732  | 1066  |
| MSTRG.10646.1 | coding    | 0.214      | 3    | 354  | 776   |
| MSTRG.10646.2 | coding    | 0.252      | 264  | 1239 | 1393  |
| MSTRG.10652.1 | coding    | 0.226      | 120  | 2505 | 4685  |
| MSTRG.10653.1 | noncoding | -0.0479232 | 45   | 504  | 734   |
| MSTRG.10652.5 | coding    | 0.296      | 0    | 1089 | 3269  |
| MSTRG.10654.1 | coding    | 0.179      | 87   | 2715 | 5179  |
| MSTRG.10659.1 | coding    | 0.071      | 639  | 831  | 2529  |
| MSTRG.10659.2 | noncoding | -0.0004096 | 51   | 57   | 765   |
| MSTRG.10665.1 | coding    | 0.359      | 0    | 1677 | 4865  |
| MSTRG.10667.4 | coding    | 0.053      | 3396 | 8064 | 10819 |
| MSTRG.10667.5 | coding    | 0.056      | 624  | 5328 | 6475  |
| MSTRG.10668.1 | noncoding | -0.094208  | 0    | 300  | 5796  |
| MSTRG.10668.2 | noncoding | -0.018432  | 4797 | 5079 | 5233  |
| MSTRG.10680.1 | noncoding | -0.002048  | 174  | 453  | 838   |
| MSTRG.10680.2 | noncoding | -0.1048576 | 642  | 888  | 1042  |
| MSTRG.10680.3 | coding    | 0.313      | 2988 | 3315 | 3472  |

|                |           |            |       |       |       |
|----------------|-----------|------------|-------|-------|-------|
| MSTRG.10680.4  | noncoding | -0.077824  | 0     | 171   | 8626  |
| MSTRG.10685.1  | noncoding | -0.147456  | 129   | 141   | 360   |
| MSTRG.10688.1  | coding    | 0.118      | 0     | 618   | 2099  |
| MSTRG.10700.2  | noncoding | -0.0045056 | 966   | 1113  | 1595  |
| MSTRG.10700.3  | noncoding | -0.141312  | 2040  | 2286  | 2441  |
| MSTRG.10700.4  | noncoding | -0.141312  | 2154  | 2400  | 2556  |
| MSTRG.10701.1  | noncoding | -0.04096   | 2055  | 2151  | 5105  |
| MSTRG.10700.5  | noncoding | -0.141312  | 2595  | 2841  | 2996  |
| MSTRG.10703.1  | coding    | 0.132      | 546   | 3483  | 3996  |
| MSTRG.10703.13 | coding    | 0.15       | 0     | 2436  | 2949  |
| MSTRG.10713.1  | coding    | 0.134      | 1704  | 2457  | 3076  |
| MSTRG.10713.5  | coding    | 0.134      | 936   | 1689  | 2250  |
| MSTRG.10713.4  | coding    | 0.134      | 969   | 1722  | 2285  |
| MSTRG.10713.6  | coding    | 0.134      | 1437  | 2190  | 2412  |
| MSTRG.10715.1  | noncoding | -0.0417792 | 501   | 582   | 1986  |
| MSTRG.10707.1  | noncoding | -0.024576  | 405   | 450   | 1025  |
| MSTRG.10712.2  | noncoding | -0.0192512 | 1194  | 1392  | 4892  |
| MSTRG.10718.1  | coding    | 0.184      | 411   | 777   | 1151  |
| MSTRG.10725.1  | noncoding | -0.0454656 | 6414  | 6603  | 6803  |
| MSTRG.10725.2  | noncoding | -0.057344  | 4077  | 4185  | 4339  |
| MSTRG.10761.1  | noncoding | -0.0708608 | 786   | 804   | 1986  |
| MSTRG.10764.1  | noncoding | -0.1306624 | 108   | 147   | 422   |
| MSTRG.10766.1  | coding    | 0.254      | 78    | 681   | 1627  |
| MSTRG.10766.2  | coding    | 0.254      | 78    | 681   | 1629  |
| MSTRG.10767.1  | noncoding | -0.200704  | 27    | 60    | 215   |
| MSTRG.10768.1  | noncoding | -0.073728  | 246   | 288   | 507   |
| MSTRG.10769.1  | noncoding | -0.045056  | 2382  | 2604  | 8278  |
| MSTRG.10765.1  | noncoding | -0.012288  | 2376  | 2544  | 2701  |
| MSTRG.10765.2  | noncoding | -0.0380928 | 219   | 345   | 745   |
| MSTRG.10772.1  | noncoding | -0.0589824 | 597   | 1008  | 1162  |
| MSTRG.10775.1  | noncoding | -0.065536  | 711   | 732   | 1082  |
| MSTRG.10776.1  | noncoding | -0.352256  | 207   | 222   | 2408  |
| MSTRG.10776.2  | noncoding | -0.0770048 | 1479  | 1785  | 5510  |
| MSTRG.10777.1  | noncoding | -0.043008  | 486   | 711   | 2631  |
| MSTRG.10774.2  | noncoding | -0.1511424 | 1089  | 1131  | 2463  |
| MSTRG.10778.1  | coding    | 0.11       | 1650  | 1965  | 2662  |
| MSTRG.10774.3  | coding    | 0.124      | 1902  | 2073  | 2335  |
| MSTRG.10774.4  | noncoding | -0.141312  | 0     | 1317  | 3602  |
| MSTRG.10774.5  | noncoding | -0.1396736 | 0     | 1356  | 2679  |
| MSTRG.10779.1  | coding    | 0.058      | 4470  | 4686  | 6090  |
| MSTRG.10774.6  | noncoding | -0.02048   | 6612  | 6726  | 8745  |
| MSTRG.10780.1  | noncoding | -0.045056  | 87    | 174   | 1067  |
| MSTRG.10782.1  | noncoding | -0.0364544 | 186   | 651   | 808   |
| MSTRG.10786.2  | coding    | 0.158      | 102   | 1305  | 1494  |
| MSTRG.10786.4  | coding    | 0.127      | 0     | 1410  | 5126  |
| MSTRG.10787.1  | coding    | 0.091      | 11472 | 12204 | 12714 |
| MSTRG.10789.1  | noncoding | -0.0344064 | 5715  | 5910  | 8220  |
| MSTRG.10790.1  | noncoding | -0.014336  | 126   | 291   | 2951  |
| MSTRG.10791.1  | noncoding | -0.004096  | 5253  | 5469  | 7222  |
| MSTRG.10792.1  | noncoding | -0.024576  | 468   | 579   | 4062  |
| MSTRG.10793.3  | coding    | 0.134      | 1530  | 3459  | 3616  |
| MSTRG.10793.2  | coding    | 0.134      | 3120  | 5049  | 5205  |
| MSTRG.10794.1  | noncoding | -0.0290816 | 132   | 249   | 557   |
| MSTRG.10794.2  | noncoding | -0.0311296 | 120   | 252   | 409   |

|               |           |            |       |       |       |
|---------------|-----------|------------|-------|-------|-------|
| MSTRG.10795.4 | coding    | 0.084      | 2643  | 5811  | 8523  |
| MSTRG.10795.5 | coding    | 0.085      | 2289  | 5526  | 8238  |
| MSTRG.10796.1 | noncoding | -0.0032768 | 24    | 180   | 333   |
| MSTRG.10806.4 | coding    | 0.026      | 1032  | 1689  | 2300  |
| MSTRG.10807.1 | noncoding | -0.0155648 | 729   | 1077  | 1644  |
| MSTRG.10808.2 | coding    | 0.423      | 423   | 957   | 4471  |
| MSTRG.10808.5 | noncoding | -0.1011712 | 0     | 414   | 2688  |
| MSTRG.10808.6 | coding    | 0.419      | 1716  | 2292  | 5805  |
| MSTRG.10808.7 | coding    | 0.423      | 918   | 1452  | 4966  |
| MSTRG.10809.1 | noncoding | -0.1560576 | 0     | 81    | 1525  |
| MSTRG.10811.1 | noncoding | -0.0626688 | 78    | 291   | 1117  |
| MSTRG.10812.1 | noncoding | -0.0004096 | 0     | 0     | 298   |
| MSTRG.10820.1 | coding    | 0.223      | 345   | 1353  | 4387  |
| MSTRG.10825.1 | coding    | 0.067      | 171   | 486   | 5123  |
| MSTRG.10830.1 | noncoding | -0.0004096 | 591   | 831   | 1723  |
| MSTRG.10831.1 | noncoding | -0.049152  | 1458  | 1497  | 3551  |
| MSTRG.10829.4 | coding    | 0.035      | 4785  | 5250  | 6549  |
| MSTRG.10829.5 | noncoding | -0.0053248 | 894   | 1014  | 2534  |
| MSTRG.10837.1 | coding    | 0.518      | 0     | 2160  | 5018  |
| MSTRG.10837.2 | coding    | 0.525      | 0     | 1653  | 4511  |
| MSTRG.10837.4 | coding    | 0.479      | 0     | 900   | 1716  |
| MSTRG.10838.1 | noncoding | -0.0319488 | 696   | 831   | 1738  |
| MSTRG.10840.2 | coding    | 0.361      | 117   | 2694  | 4448  |
| MSTRG.10840.3 | noncoding | -0.1097728 | 6855  | 7152  | 7305  |
| MSTRG.10843.5 | coding    | 0.199      | 6576  | 7341  | 9464  |
| MSTRG.10844.2 | coding    | 0.096      | 2082  | 3099  | 4557  |
| MSTRG.10844.1 | coding    | 0.091      | 2973  | 3705  | 5163  |
| MSTRG.10845.1 | noncoding | -0.0208896 | 1329  | 1482  | 2507  |
| MSTRG.10847.1 | noncoding | -0.12288   | 90    | 141   | 940   |
| MSTRG.10848.2 | coding    | 0.136      | 1041  | 2010  | 2269  |
| MSTRG.10848.3 | coding    | 0.123      | 1044  | 2139  | 2386  |
| MSTRG.10848.4 | coding    | 0.135      | 36    | 1257  | 1504  |
| MSTRG.10851.3 | coding    | 0.564      | 324   | 1452  | 6743  |
| MSTRG.10852.1 | noncoding | -0.0589824 | 0     | 162   | 376   |
| MSTRG.10853.1 | noncoding | -0.0004096 | 0     | 93    | 283   |
| MSTRG.10857.1 | noncoding | -0.0004096 | 0     | 0     | 213   |
| MSTRG.10867.3 | coding    | 0.228      | 0     | 1065  | 4574  |
| MSTRG.10876.7 | coding    | 0.103      | 366   | 1278  | 1985  |
| MSTRG.10876.8 | coding    | 0.103      | 504   | 1416  | 2123  |
| MSTRG.10876.6 | coding    | 0.103      | 258   | 1170  | 2259  |
| MSTRG.10880.3 | coding    | 0.048      | 111   | 2073  | 2507  |
| MSTRG.10882.1 | noncoding | -0.024576  | 432   | 534   | 1642  |
| MSTRG.10882.2 | noncoding | -0.0483328 | 840   | 1062  | 3206  |
| MSTRG.10882.4 | coding    | 0.159      | 816   | 1059  | 3263  |
| MSTRG.10882.5 | coding    | 0.105      | 1182  | 1482  | 2372  |
| MSTRG.10882.6 | noncoding | -0.038912  | 9     | 228   | 2432  |
| MSTRG.10882.7 | coding    | 0.18       | 429   | 675   | 2933  |
| MSTRG.10882.8 | noncoding | -0.057344  | 348   | 378   | 823   |
| MSTRG.10888.2 | coding    | 0.261      | 579   | 1470  | 1943  |
| MSTRG.10888.4 | coding    | 0.278      | 0     | 1236  | 1709  |
| MSTRG.10889.1 | noncoding | -0.002048  | 11442 | 11559 | 14448 |
| MSTRG.10889.2 | coding    | 0.306      | 981   | 1275  | 1671  |
| MSTRG.10890.1 | noncoding | -0.0299008 | 0     | 306   | 769   |
| MSTRG.10889.5 | coding    | 0.317      | 20649 | 20991 | 23935 |

|               |           |            |       |       |       |
|---------------|-----------|------------|-------|-------|-------|
| MSTRG.10889.7 | coding    | 0.353      | 132   | 675   | 18926 |
| MSTRG.10889.8 | coding    | 0.441      | 1695  | 2397  | 7120  |
| MSTRG.10889.9 | coding    | 0.438      | 765   | 1452  | 2982  |
| MSTRG.10899.1 | coding    | 0.422      | 141   | 1131  | 7557  |
| MSTRG.10901.1 | noncoding | -0.026624  | 12102 | 12882 | 13566 |
| MSTRG.10902.1 | noncoding | -0.0770048 | 1692  | 1920  | 5507  |
| MSTRG.10903.1 | noncoding | -0.004096  | 12468 | 12609 | 16157 |
| MSTRG.10896.2 | coding    | 0.189      | 222   | 795   | 980   |
| MSTRG.10896.3 | coding    | 0.152      | 222   | 960   | 1145  |
| MSTRG.10906.1 | coding    | 0.111      | 0     | 171   | 498   |
| MSTRG.10907.2 | coding    | 0.108      | 0     | 885   | 1056  |
| MSTRG.10907.3 | noncoding | -0.0376832 | 345   | 702   | 874   |
| MSTRG.10910.1 | noncoding | -0.0004096 | 0     | 0     | 365   |
| MSTRG.10922.3 | coding    | 0.339      | 0     | 4731  | 9147  |
| MSTRG.10922.5 | coding    | 0.331      | 0     | 3258  | 9212  |
| MSTRG.10923.1 | noncoding | -0.049152  | 72    | 78    | 1318  |
| MSTRG.10925.1 | coding    | 0.182      | 456   | 1605  | 3910  |
| MSTRG.10925.9 | coding    | 0.174      | 375   | 1494  | 4012  |
| MSTRG.10928.1 | noncoding | -0.0196608 | 618   | 975   | 4875  |
| MSTRG.10913.1 | noncoding | -0.047104  | 0     | 54    | 473   |
| MSTRG.10919.1 | coding    | 0.37       | 204   | 1770  | 5118  |
| MSTRG.10921.1 | noncoding | -0.0401408 | 195   | 402   | 648   |
| MSTRG.10935.1 | coding    | 0.239      | 264   | 1767  | 3387  |
| MSTRG.10935.2 | coding    | 0.269      | 0     | 1563  | 2877  |
| MSTRG.10936.2 | coding    | 0.557      | 174   | 1641  | 3643  |
| MSTRG.10941.2 | coding    | 0.091      | 651   | 1830  | 3254  |
| MSTRG.10942.2 | noncoding | -0.0180224 | 531   | 678   | 3952  |
| MSTRG.10943.1 | noncoding | -0.0323584 | 1443  | 1590  | 2856  |
| MSTRG.10944.1 | coding    | 0.423      | 0     | 2022  | 7261  |
| MSTRG.10950.3 | coding    | 0.055      | 1089  | 2688  | 4509  |
| MSTRG.10950.4 | coding    | 0.062      | 84    | 1683  | 3502  |
| MSTRG.10956.1 | noncoding | -0.008192  | 87    | 246   | 548   |
| MSTRG.10958.1 | noncoding | -0.008192  | 1212  | 1236  | 1447  |
| MSTRG.10961.1 | noncoding | -0.1024    | 21    | 39    | 1055  |
| MSTRG.10971.1 | noncoding | -0.0495616 | 315   | 381   | 1101  |
| MSTRG.10976.1 | noncoding | -0.06144   | 120   | 222   | 654   |
| MSTRG.10976.2 | noncoding | -0.036864  | 195   | 243   | 680   |
| MSTRG.10976.3 | noncoding | -0.0004096 | 183   | 183   | 355   |
| MSTRG.10984.1 | coding    | 0.112      | 465   | 1503  | 2347  |
| MSTRG.10984.3 | coding    | 0.01       | 2922  | 3114  | 3757  |
| MSTRG.10990.4 | noncoding | -0.0372736 | 16647 | 16821 | 26689 |
| MSTRG.10990.3 | noncoding | -0.045056  | 10155 | 10263 | 18650 |
| MSTRG.10990.5 | noncoding | -0.0372736 | 3597  | 3774  | 7349  |
| MSTRG.11012.1 | coding    | 0.156      | 33    | 1476  | 4066  |
| MSTRG.11012.2 | coding    | 0.154      | 9     | 1455  | 4046  |
| MSTRG.11039.1 | noncoding | -0.0462848 | 3465  | 3543  | 9137  |
| MSTRG.11040.1 | noncoding | -0.1212416 | 0     | 282   | 6134  |
| MSTRG.11041.1 | coding    | 0.073      | 696   | 909   | 3811  |
| MSTRG.11042.1 | coding    | 0.042      | 3315  | 4068  | 8032  |
| MSTRG.11043.1 | coding    | 0.108      | 3192  | 3669  | 6260  |
| MSTRG.11044.1 | noncoding | -0.088064  | 486   | 795   | 2980  |
| MSTRG.11045.1 | noncoding | -0.012288  | 231   | 342   | 1171  |
| MSTRG.11046.1 | noncoding | -0.12288   | 129   | 150   | 384   |
| MSTRG.11036.2 | coding    | 0.048      | 744   | 1935  | 3769  |

|               |           |            |       |       |       |
|---------------|-----------|------------|-------|-------|-------|
| MSTRG.11036.1 | coding    | 0.047      | 366   | 1989  | 2571  |
| MSTRG.11037.1 | noncoding | -0.028672  | 9     | 126   | 281   |
| MSTRG.11050.1 | noncoding | -0.0487424 | 618   | 825   | 1316  |
| MSTRG.11050.2 | noncoding | -0.0495616 | 105   | 126   | 287   |
| MSTRG.11055.1 | noncoding | -0.049152  | 42    | 267   | 495   |
| MSTRG.11057.1 | noncoding | -0.0004096 | 0     | 0     | 293   |
| MSTRG.11060.1 | coding    | 0.14       | 303   | 1107  | 1261  |
| MSTRG.11071.2 | coding    | 0.033      | 1686  | 5541  | 9194  |
| MSTRG.11071.3 | coding    | 0.041      | 1737  | 4824  | 8777  |
| MSTRG.11071.4 | coding    | 0.041      | 1686  | 4773  | 8726  |
| MSTRG.11071.5 | coding    | 0.045      | 4431  | 7131  | 10014 |
| MSTRG.11072.1 | coding    | 0.033      | 3282  | 3453  | 4933  |
| MSTRG.11073.2 | noncoding | -0.012288  | 879   | 1023  | 1631  |
| MSTRG.11063.1 | coding    | 0.316      | 0     | 1278  | 1590  |
| MSTRG.11063.3 | coding    | 0.309      | 207   | 1461  | 1749  |
| MSTRG.11076.2 | coding    | 0.23       | 117   | 1080  | 3703  |
| MSTRG.11100.1 | noncoding | -0.024576  | 10134 | 10251 | 12271 |
| MSTRG.11101.1 | noncoding | -0.024576  | 498   | 558   | 3843  |
| MSTRG.11090.1 | noncoding | -0.0671744 | 366   | 708   | 1086  |
| MSTRG.11091.5 | coding    | 0.125      | 0     | 2151  | 3814  |
| MSTRG.11091.6 | coding    | 0.092      | 468   | 2184  | 3849  |
| MSTRG.11096.2 | coding    | 0.298      | 0     | 732   | 1157  |
| MSTRG.11098.1 | coding    | 0.111      | 3     | 1854  | 9705  |
| MSTRG.11098.2 | coding    | 0.146      | 0     | 1155  | 2122  |
| MSTRG.11103.2 | noncoding | -0.077824  | 1140  | 1236  | 1393  |
| MSTRG.11103.3 | noncoding | -0.012288  | 1302  | 1398  | 1802  |
| MSTRG.11109.1 | noncoding | -0.0004096 | 0     | 0     | 207   |
| MSTRG.11154.2 | coding    | 0.168      | 126   | 5778  | 7557  |
| MSTRG.11156.1 | noncoding | -0.008192  | 0     | 69    | 336   |
| MSTRG.11158.1 | noncoding | -0.043008  | 579   | 828   | 4158  |
| MSTRG.11161.1 | noncoding | -0.012288  | 114   | 366   | 1191  |
| MSTRG.11161.4 | noncoding | -0.0475136 | 0     | 84    | 552   |
| MSTRG.11170.1 | coding    | 0.069      | 1707  | 2154  | 2986  |
| MSTRG.11171.1 | noncoding | -0.004096  | 219   | 285   | 1597  |
| MSTRG.11169.3 | coding    | 0.172      | 1068  | 1968  | 2178  |
| MSTRG.11177.1 | coding    | 0.208      | 123   | 2829  | 3037  |
| MSTRG.11163.2 | noncoding | -0.0016384 | 2094  | 2139  | 2438  |
| MSTRG.11185.1 | coding    | 0.116      | 1494  | 4707  | 8646  |
| MSTRG.11186.1 | noncoding | -0.036864  | 648   | 699   | 2641  |
| MSTRG.11188.3 | coding    | 0.082      | 0     | 2802  | 5994  |
| MSTRG.11190.3 | coding    | 0.092      | 138   | 4323  | 6759  |
| MSTRG.11191.1 | coding    | 0.26       | 477   | 1152  | 2751  |
| MSTRG.11194.2 | noncoding | -0.024576  | 273   | 381   | 702   |
| MSTRG.11199.1 | noncoding | -0.0073728 | 1644  | 1746  | 2694  |
| MSTRG.11194.4 | noncoding | -0.0180224 | 0     | 234   | 736   |
| MSTRG.11230.1 | noncoding | -0.0888832 | 411   | 465   | 702   |
| MSTRG.11235.1 | noncoding | -0.0761856 | 867   | 1263  | 1416  |
| MSTRG.11235.2 | coding    | 0.205      | 0     | 447   | 3069  |
| MSTRG.11243.1 | coding    | 0.275      | 8205  | 9519  | 14645 |
| MSTRG.11243.3 | coding    | 0.195      | 972   | 3273  | 7639  |
| MSTRG.11243.6 | noncoding | -0.057344  | 195   | 204   | 447   |
| MSTRG.11243.8 | coding    | 0.199      | 234   | 2508  | 2668  |
| MSTRG.11219.1 | noncoding | -0.0069632 | 1077  | 1134  | 1629  |
| MSTRG.11226.1 | coding    | 0.231      | 462   | 2556  | 3182  |

|                  |           |             |       |       |       |
|------------------|-----------|-------------|-------|-------|-------|
| MSTRG. 11226. 3  | coding    | 0. 222      | 66    | 2058  | 2683  |
| MSTRG. 11221. 1  | noncoding | -0. 0589824 | 63    | 81    | 697   |
| MSTRG. 11221. 2  | noncoding | -0. 008192  | 474   | 555   | 808   |
| MSTRG. 11248. 3  | coding    | 0. 349      | 0     | 4824  | 5795  |
| MSTRG. 11248. 9  | coding    | 0. 371      | 246   | 4614  | 5538  |
| MSTRG. 11248. 8  | coding    | 0. 362      | 594   | 5106  | 6030  |
| MSTRG. 11248. 6  | coding    | 0. 369      | 1068  | 5490  | 6412  |
| MSTRG. 11248. 7  | coding    | 0. 363      | 342   | 4875  | 5799  |
| MSTRG. 11249. 1  | noncoding | -0. 0524288 | 13023 | 13203 | 13478 |
| MSTRG. 11257. 1  | noncoding | -0. 0004096 | 0     | 0     | 420   |
| MSTRG. 11256. 1  | noncoding | -0. 028672  | 33    | 150   | 304   |
| MSTRG. 11279. 1  | noncoding | -0. 098304  | 309   | 360   | 649   |
| MSTRG. 11283. 1  | coding    | 0. 049      | 33    | 1173  | 2564  |
| MSTRG. 11283. 2  | coding    | 0. 049      | 0     | 1140  | 1992  |
| MSTRG. 11284. 1  | coding    | 0. 279      | 0     | 471   | 1253  |
| MSTRG. 11292. 1  | coding    | 0. 298      | 0     | 3045  | 3846  |
| MSTRG. 11293. 1  | noncoding | -0. 0073728 | 1677  | 1833  | 3027  |
| MSTRG. 11294. 2  | noncoding | -0. 3284992 | 0     | 1140  | 6249  |
| MSTRG. 11294. 3  | coding    | 0. 257      | 354   | 693   | 4399  |
| MSTRG. 11294. 4  | coding    | 0. 345      | 279   | 1104  | 5177  |
| MSTRG. 11300. 3  | coding    | 0. 112      | 1050  | 1251  | 1925  |
| MSTRG. 11301. 2  | noncoding | -0. 02048   | 2280  | 2409  | 5142  |
| MSTRG. 11301. 1  | noncoding | -0. 02048   | 4107  | 4236  | 6384  |
| MSTRG. 11301. 3  | noncoding | -0. 135168  | 2082  | 2145  | 2428  |
| MSTRG. 11301. 4  | noncoding | -0. 016384  | 6627  | 6747  | 7062  |
| MSTRG. 11301. 5  | noncoding | -0. 0200704 | 960   | 1074  | 2483  |
| MSTRG. 11302. 1  | noncoding | -0. 028672  | 357   | 456   | 1094  |
| MSTRG. 11302. 2  | noncoding | -0. 0008192 | 2745  | 2883  | 9992  |
| MSTRG. 11303. 1  | noncoding | -0. 0004096 | 453   | 453   | 607   |
| MSTRG. 11304. 2  | coding    | 0. 047      | 207   | 1125  | 1993  |
| MSTRG. 11304. 3  | noncoding | -0. 0188416 | 276   | 678   | 946   |
| MSTRG. 11373. 3  | coding    | 0. 106      | 0     | 2271  | 3657  |
| MSTRG. 11373. 4  | coding    | 0. 072      | 1989  | 2229  | 6336  |
| MSTRG. 11373. 8  | noncoding | -0. 0004096 | 345   | 495   | 1824  |
| MSTRG. 11377. 1  | coding    | 0. 29       | 1263  | 4944  | 12541 |
| MSTRG. 11377. 2  | coding    | 0. 278      | 1290  | 5046  | 6866  |
| MSTRG. 11378. 1  | noncoding | -0. 0004096 | 90    | 231   | 1192  |
| MSTRG. 11377. 3  | coding    | 0. 26       | 108   | 4914  | 7246  |
| MSTRG. 11377. 4  | coding    | 0. 276      | 2013  | 5886  | 7555  |
| MSTRG. 11377. 5  | coding    | 0. 278      | 108   | 3864  | 10212 |
| MSTRG. 11377. 7  | coding    | 0. 276      | 513   | 4590  | 4744  |
| MSTRG. 11377. 6  | coding    | 0. 262      | 660   | 4848  | 5001  |
| MSTRG. 11377. 8  | coding    | 0. 147      | 15333 | 16164 | 17452 |
| MSTRG. 11377. 9  | coding    | 0. 156      | 8832  | 9813  | 11104 |
| MSTRG. 11377. 10 | noncoding | -0. 024576  | 729   | 828   | 1120  |
| MSTRG. 11379. 1  | noncoding | -0. 237568  | 69    | 102   | 2736  |
| MSTRG. 11377. 11 | coding    | 0. 117      | 2592  | 3048  | 9210  |
| MSTRG. 11381. 1  | noncoding | -0. 090112  | 1542  | 1563  | 3044  |
| MSTRG. 11382. 1  | noncoding | -0. 028672  | 2145  | 2250  | 2594  |
| MSTRG. 11377. 18 | coding    | 0. 039      | 144   | 924   | 3619  |
| MSTRG. 11377. 19 | coding    | 0. 039      | 171   | 951   | 26685 |
| MSTRG. 11377. 20 | coding    | 0. 038      | 384   | 1170  | 15415 |
| MSTRG. 11377. 21 | coding    | 0. 039      | 177   | 957   | 5204  |
| MSTRG. 11377. 22 | noncoding | -0. 0761856 | 1371  | 1380  | 1536  |

|                  |           |             |       |       |       |
|------------------|-----------|-------------|-------|-------|-------|
| MSTRG. 11377. 23 | noncoding | -0. 016384  | 120   | 213   | 8068  |
| MSTRG. 11377. 24 | coding    | 0. 093      | 26949 | 27474 | 34337 |
| MSTRG. 11377. 25 | coding    | 0. 093      | 18270 | 18795 | 25658 |
| MSTRG. 11377. 26 | coding    | 0. 156      | 318   | 402   | 2255  |
| MSTRG. 11377. 27 | noncoding | -0. 045056  | 477   | 567   | 3447  |
| MSTRG. 11309. 1  | noncoding | -0. 0823296 | 1548  | 2235  | 2806  |
| MSTRG. 11307. 2  | noncoding | -0. 0835584 | 633   | 639   | 1210  |
| MSTRG. 11313. 1  | noncoding | -0. 155648  | 1344  | 1413  | 2700  |
| MSTRG. 11313. 2  | noncoding | -0. 0782336 | 0     | 372   | 15851 |
| MSTRG. 11313. 3  | noncoding | -0. 110592  | 3336  | 3822  | 3975  |
| MSTRG. 11313. 4  | noncoding | -0. 108544  | 4344  | 4827  | 4980  |
| MSTRG. 11319. 1  | noncoding | -0. 0004096 | 654   | 810   | 964   |
| MSTRG. 11319. 2  | noncoding | -0. 0401408 | 546   | 708   | 871   |
| MSTRG. 11321. 1  | coding    | 0. 105      | 0     | 2529  | 4637  |
| MSTRG. 11326. 1  | noncoding | -0. 0258048 | 198   | 291   | 466   |
| MSTRG. 11328. 2  | coding    | 0. 3        | 0     | 726   | 1758  |
| MSTRG. 11328. 4  | coding    | 0. 302      | 0     | 450   | 4590  |
| MSTRG. 11331. 1  | coding    | 0. 071      | 135   | 576   | 1046  |
| MSTRG. 11335. 1  | coding    | 0. 203      | 0     | 123   | 335   |
| MSTRG. 11336. 2  | coding    | 0. 282      | 0     | 1635  | 5582  |
| MSTRG. 11336. 3  | coding    | 0. 208      | 363   | 1752  | 4344  |
| MSTRG. 11338. 2  | noncoding | -0. 002048  | 81    | 228   | 3267  |
| MSTRG. 11338. 3  | noncoding | -0. 1060864 | 0     | 522   | 3980  |
| MSTRG. 11350. 1  | coding    | 0. 127      | 0     | 1089  | 22679 |
| MSTRG. 11350. 5  | coding    | 0. 12       | 0     | 1071  | 5554  |
| MSTRG. 11350. 6  | coding    | 0. 12       | 0     | 1071  | 5728  |
| MSTRG. 11350. 4  | coding    | 0. 12       | 0     | 1071  | 9411  |
| MSTRG. 11350. 7  | coding    | 0. 172      | 1761  | 2145  | 10148 |
| MSTRG. 11351. 1  | coding    | 0. 17       | 1893  | 2148  | 4643  |
| MSTRG. 11352. 1  | noncoding | -0. 118784  | 813   | 843   | 1777  |
| MSTRG. 11350. 8  | coding    | 0. 055      | 1431  | 1761  | 5691  |
| MSTRG. 11357. 1  | coding    | 0. 09       | 1092  | 1362  | 1754  |
| MSTRG. 11358. 1  | coding    | 0. 086      | 873   | 1155  | 5726  |
| MSTRG. 11359. 1  | noncoding | -0. 0118784 | 7119  | 7263  | 9327  |
| MSTRG. 11360. 1  | noncoding | -0. 036864  | 5778  | 5889  | 20756 |
| MSTRG. 11360. 2  | noncoding | -0. 049152  | 3540  | 3597  | 4492  |
| MSTRG. 11344. 2  | noncoding | -0. 04096   | 1146  | 1233  | 4891  |
| MSTRG. 11345. 1  | noncoding | -0. 0139264 | 4713  | 4872  | 8738  |
| MSTRG. 11345. 2  | noncoding | -0. 047104  | 5763  | 5958  | 9873  |
| MSTRG. 11346. 1  | noncoding | -0. 08192   | 291   | 375   | 661   |
| MSTRG. 11347. 1  | noncoding | -0. 0065536 | 4377  | 4518  | 17052 |
| MSTRG. 11348. 3  | noncoding | -0. 0352256 | 1767  | 1932  | 2738  |
| MSTRG. 11363. 1  | noncoding | -0. 004096  | 420   | 558   | 1839  |
| MSTRG. 11365. 1  | noncoding | -0. 08192   | 1662  | 1764  | 3861  |
| MSTRG. 11366. 1  | noncoding | -0. 004096  | 1350  | 1488  | 4509  |
| MSTRG. 11367. 1  | noncoding | -0. 049152  | 4137  | 4338  | 15468 |
| MSTRG. 11367. 2  | noncoding | -0. 049152  | 5901  | 6102  | 14052 |
| MSTRG. 11400. 1  | coding    | 0. 224      | 186   | 3900  | 17998 |
| MSTRG. 11400. 2  | coding    | 0. 23       | 186   | 3768  | 6963  |
| MSTRG. 11400. 3  | coding    | 0. 233      | 0     | 3426  | 4969  |
| MSTRG. 11400. 4  | noncoding | -0. 0446464 | 6198  | 6357  | 16586 |
| MSTRG. 11400. 5  | noncoding | -0. 0561152 | 186   | 2445  | 18993 |
| MSTRG. 11403. 1  | coding    | 0. 047      | 255   | 4242  | 4479  |
| MSTRG. 11404. 1  | coding    | 0. 064      | 2724  | 4353  | 4604  |

|                  |           |             |       |       |       |
|------------------|-----------|-------------|-------|-------|-------|
| MSTRG. 11404. 2  | coding    | 0. 064      | 2880  | 4509  | 4765  |
| MSTRG. 11408. 1  | coding    | 0. 126      | 918   | 4665  | 6047  |
| MSTRG. 11410. 1  | coding    | 0. 155      | 0     | 1257  | 1702  |
| MSTRG. 11411. 1  | coding    | 0. 093      | 807   | 1077  | 1278  |
| MSTRG. 11411. 2  | noncoding | -0. 0004096 | 129   | 147   | 705   |
| MSTRG. 11413. 3  | coding    | 0. 268      | 246   | 1035  | 5726  |
| MSTRG. 11413. 4  | coding    | 0. 232      | 1494  | 2088  | 6778  |
| MSTRG. 11406. 3  | coding    | 0. 361      | 0     | 1362  | 2623  |
| MSTRG. 11414. 1  | noncoding | -0. 073728  | 1206  | 1326  | 1865  |
| MSTRG. 11417. 1  | noncoding | -0. 088064  | 1233  | 1626  | 1780  |
| MSTRG. 11417. 2  | noncoding | -0. 0606208 | 918   | 1164  | 1994  |
| MSTRG. 11417. 3  | noncoding | -0. 0606208 | 615   | 861   | 2681  |
| MSTRG. 11417. 4  | noncoding | -0. 0606208 | 2832  | 3078  | 4220  |
| MSTRG. 11418. 4  | coding    | 0. 189      | 0     | 3222  | 3516  |
| MSTRG. 11427. 1  | coding    | 0. 347      | 11211 | 15180 | 16481 |
| MSTRG. 11427. 3  | coding    | 0. 347      | 11424 | 15393 | 16774 |
| MSTRG. 11427. 4  | coding    | 0. 347      | 11352 | 15321 | 16621 |
| MSTRG. 11429. 1  | coding    | 0. 212      | 144   | 3531  | 5799  |
| MSTRG. 11430. 1  | noncoding | -0. 0385024 | 105   | 417   | 1710  |
| MSTRG. 11431. 2  | coding    | 0. 316      | 243   | 4041  | 4600  |
| MSTRG. 11431. 3  | coding    | 0. 32       | 372   | 4191  | 4750  |
| MSTRG. 11432. 1  | coding    | 0. 283      | 249   | 2205  | 2411  |
| MSTRG. 11433. 1  | noncoding | -0. 0421888 | 57    | 246   | 695   |
| MSTRG. 11436. 1  | coding    | 0. 201      | 576   | 1443  | 1896  |
| MSTRG. 11436. 2  | coding    | 0. 213      | 576   | 1416  | 1807  |
| MSTRG. 11437. 3  | coding    | 0. 253      | 141   | 981   | 1308  |
| MSTRG. 11438. 1  | coding    | 0. 538      | 0     | 1050  | 1206  |
| MSTRG. 11439. 3  | coding    | 0. 492      | 522   | 8163  | 8550  |
| MSTRG. 11441. 4  | coding    | 0. 364      | 1650  | 2619  | 3068  |
| MSTRG. 11441. 2  | coding    | 0. 263      | 0     | 1743  | 3256  |
| MSTRG. 11441. 3  | coding    | 0. 212      | 177   | 1956  | 3469  |
| MSTRG. 11442. 1  | noncoding | -0. 0192512 | 510   | 723   | 1666  |
| MSTRG. 11443. 4  | coding    | 0. 215      | 0     | 1200  | 2086  |
| MSTRG. 11443. 5  | coding    | 0. 226      | 0     | 1164  | 2596  |
| MSTRG. 11443. 7  | coding    | 0. 219      | 0     | 1182  | 2050  |
| MSTRG. 11443. 8  | coding    | 0. 186      | 0     | 1257  | 2126  |
| MSTRG. 11443. 6  | coding    | 0. 186      | 0     | 1257  | 2687  |
| MSTRG. 11421. 3  | coding    | 0. 222      | 0     | 342   | 551   |
| MSTRG. 11423. 1  | noncoding | -0. 026624  | 180   | 666   | 1646  |
| MSTRG. 11424. 2  | coding    | 0. 334      | 1809  | 4128  | 4732  |
| MSTRG. 11449. 2  | noncoding | -0. 008192  | 1485  | 1641  | 1809  |
| MSTRG. 11457. 1  | coding    | 0. 37       | 153   | 924   | 6580  |
| MSTRG. 11457. 2  | coding    | 0. 397      | 0     | 699   | 4549  |
| MSTRG. 11457. 3  | coding    | 0. 368      | 0     | 447   | 1020  |
| MSTRG. 11460. 1  | noncoding | -0. 192512  | 738   | 768   | 1554  |
| MSTRG. 11462. 12 | coding    | 0. 149      | 2364  | 2586  | 5737  |
| MSTRG. 11462. 7  | coding    | 0. 149      | 990   | 1212  | 4362  |
| MSTRG. 11462. 8  | noncoding | -0. 0700416 | 4413  | 4836  | 5154  |
| MSTRG. 11462. 9  | coding    | 0. 149      | 1947  | 2169  | 5318  |
| MSTRG. 11462. 13 | coding    | 0. 149      | 1209  | 1431  | 4581  |
| MSTRG. 11462. 14 | coding    | 0. 149      | 2847  | 3069  | 3499  |
| MSTRG. 11462. 15 | noncoding | -0. 131072  | 105   | 204   | 2030  |
| MSTRG. 11463. 1  | noncoding | -0. 0823296 | 519   | 1458  | 1615  |
| MSTRG. 11464. 1  | noncoding | -0. 028672  | 4389  | 4512  | 6437  |



|                  |           |             |      |      |       |
|------------------|-----------|-------------|------|------|-------|
| MSTRG. 11465. 1  | noncoding | -0. 0004096 | 0    | 0    | 371   |
| MSTRG. 11466. 1  | coding    | 0. 05       | 708  | 2523 | 2676  |
| MSTRG. 11466. 2  | coding    | 0. 05       | 3858 | 5673 | 5828  |
| MSTRG. 11472. 1  | coding    | 0. 068      | 54   | 1665 | 3375  |
| MSTRG. 11472. 4  | coding    | 0. 138      | 36   | 708  | 1060  |
| MSTRG. 11472. 2  | coding    | 0. 068      | 36   | 1647 | 2744  |
| MSTRG. 11472. 5  | coding    | 0. 126      | 15   | 681  | 2638  |
| MSTRG. 11472. 6  | noncoding | -0. 045056  | 5082 | 5154 | 6357  |
| MSTRG. 11472. 7  | noncoding | -0. 077824  | 6927 | 6993 | 15536 |
| MSTRG. 11472. 8  | coding    | 0. 036      | 4554 | 4779 | 7009  |
| MSTRG. 11473. 1  | noncoding | -0. 024576  | 3042 | 3066 | 6908  |
| MSTRG. 11473. 2  | noncoding | -0. 0004096 | 3123 | 3165 | 6347  |
| MSTRG. 11473. 3  | noncoding | -0. 0004096 | 1602 | 1644 | 5245  |
| MSTRG. 11474. 1  | noncoding | -0. 02048   | 3111 | 3231 | 3861  |
| MSTRG. 11473. 4  | noncoding | -0. 024576  | 1053 | 1077 | 4920  |
| MSTRG. 11472. 9  | noncoding | -0. 0913408 | 324  | 360  | 821   |
| MSTRG. 11472. 10 | coding    | 0. 046      | 2568 | 3183 | 3647  |
| MSTRG. 11475. 1  | noncoding | -0. 0131072 | 831  | 909  | 1802  |
| MSTRG. 11469. 1  | coding    | 0. 321      | 150  | 1119 | 2258  |
| MSTRG. 11470. 5  | coding    | 0. 307      | 1029 | 3099 | 3565  |
| MSTRG. 11476. 3  | coding    | 0. 398      | 246  | 1689 | 3562  |
| MSTRG. 11476. 2  | coding    | 0. 339      | 2835 | 5850 | 7352  |
| MSTRG. 11476. 4  | coding    | 0. 399      | 12   | 1425 | 3272  |
| MSTRG. 11476. 5  | coding    | 0. 395      | 2478 | 3867 | 5715  |
| MSTRG. 11477. 1  | coding    | 0. 274      | 0    | 4839 | 5048  |
| MSTRG. 11478. 1  | noncoding | -0. 0024576 | 1215 | 1347 | 4861  |
| MSTRG. 11483. 2  | coding    | 0. 246      | 0    | 753  | 1145  |
| MSTRG. 11489. 1  | noncoding | -0. 159744  | 141  | 147  | 302   |
| MSTRG. 11490. 5  | coding    | 0. 377      | 0    | 4692 | 4847  |
| MSTRG. 11490. 6  | coding    | 0. 352      | 1092 | 4917 | 5071  |
| MSTRG. 11496. 2  | coding    | 0. 217      | 843  | 3015 | 3430  |
| MSTRG. 11499. 2  | coding    | 0. 168      | 828  | 1779 | 2860  |
| MSTRG. 11499. 4  | noncoding | -0. 0344064 | 828  | 1158 | 1457  |
| MSTRG. 11492. 7  | coding    | 0. 064      | 387  | 1416 | 1617  |
| MSTRG. 11492. 6  | coding    | 0. 064      | 600  | 1629 | 1832  |
| MSTRG. 11492. 9  | coding    | 0. 064      | 591  | 1620 | 1822  |
| MSTRG. 11492. 11 | coding    | 0. 064      | 1068 | 2097 | 2299  |
| MSTRG. 11492. 12 | coding    | 0. 064      | 369  | 1398 | 1601  |
| MSTRG. 11492. 5  | coding    | 0. 064      | 381  | 1410 | 1611  |
| MSTRG. 11492. 8  | coding    | 0. 064      | 501  | 1530 | 1733  |
| MSTRG. 11492. 10 | coding    | 0. 064      | 804  | 1833 | 2036  |
| MSTRG. 11492. 4  | coding    | 0. 064      | 537  | 1566 | 1768  |
| MSTRG. 11505. 1  | coding    | 0. 336      | 297  | 1290 | 1767  |
| MSTRG. 11505. 2  | coding    | 0. 267      | 552  | 1686 | 2443  |
| MSTRG. 11507. 1  | coding    | 0. 187      | 2601 | 3045 | 4790  |
| MSTRG. 11507. 6  | coding    | 0. 356      | 1947 | 3018 | 5961  |
| MSTRG. 11507. 8  | coding    | 0. 43       | 3225 | 3783 | 6725  |
| MSTRG. 11507. 3  | coding    | 0. 337      | 0    | 1470 | 4411  |
| MSTRG. 11507. 7  | coding    | 0. 449      | 1836 | 2343 | 5284  |
| MSTRG. 11507. 2  | coding    | 0. 356      | 2349 | 3420 | 6363  |
| MSTRG. 11507. 4  | coding    | 0. 356      | 732  | 1803 | 4746  |
| MSTRG. 11507. 9  | coding    | 0. 449      | 2910 | 3417 | 6251  |
| MSTRG. 11508. 1  | coding    | 0. 333      | 630  | 2208 | 4806  |
| MSTRG. 11508. 4  | coding    | 0. 363      | 984  | 1686 | 5301  |

|                  |           |             |       |       |       |
|------------------|-----------|-------------|-------|-------|-------|
| MSTRG. 11508. 5  | coding    | 0. 364      | 0     | 1545  | 1765  |
| MSTRG. 11510. 1  | noncoding | -0. 02048   | 4383  | 4530  | 4684  |
| MSTRG. 11513. 1  | coding    | 0. 375      | 192   | 1530  | 1766  |
| MSTRG. 11514. 1  | noncoding | -0. 0638976 | 171   | 324   | 846   |
| MSTRG. 11514. 2  | noncoding | -0. 0589824 | 204   | 354   | 587   |
| MSTRG. 11515. 1  | coding    | 0. 53       | 0     | 546   | 701   |
| MSTRG. 11520. 1  | coding    | 0. 209      | 123   | 4233  | 5259  |
| MSTRG. 11534. 1  | coding    | 0. 027      | 255   | 1281  | 3623  |
| MSTRG. 11537. 1  | noncoding | -0. 0303104 | 441   | 606   | 1196  |
| MSTRG. 11539. 3  | coding    | 0. 195      | 171   | 1725  | 2639  |
| MSTRG. 11540. 4  | noncoding | -0. 0344064 | 0     | 195   | 1356  |
| MSTRG. 11530. 2  | coding    | 0. 267      | 0     | 564   | 1268  |
| MSTRG. 11551. 1  | noncoding | -0. 0704512 | 2640  | 2922  | 5804  |
| MSTRG. 11551. 2  | noncoding | -0. 0704512 | 2571  | 2853  | 4985  |
| MSTRG. 11553. 1  | coding    | 0. 206      | 30    | 873   | 1031  |
| MSTRG. 11549. 5  | noncoding | -0. 014336  | 0     | 123   | 890   |
| MSTRG. 11549. 4  | noncoding | -0. 0421888 | 10065 | 10512 | 12379 |
| MSTRG. 11542. 1  | noncoding | -0. 0299008 | 4407  | 4848  | 5586  |
| MSTRG. 11545. 1  | noncoding | -0. 036864  | 402   | 570   | 1131  |
| MSTRG. 11556. 2  | noncoding | -0. 0724992 | 534   | 936   | 1421  |
| MSTRG. 11560. 1  | noncoding | -0. 0004096 | 27    | 183   | 562   |
| MSTRG. 11568. 1  | coding    | 0. 107      | 540   | 1239  | 1973  |
| MSTRG. 11570. 1  | noncoding | -0. 0155648 | 504   | 540   | 1108  |
| MSTRG. 11571. 1  | noncoding | -0. 018432  | 126   | 165   | 435   |
| MSTRG. 11584. 1  | noncoding | -0. 161792  | 117   | 345   | 1007  |
| MSTRG. 11586. 1  | coding    | 0. 213      | 0     | 1032  | 2866  |
| MSTRG. 11589. 2  | coding    | 0. 533      | 516   | 2976  | 3629  |
| MSTRG. 11590. 3  | coding    | 0. 403      | 120   | 1116  | 1836  |
| MSTRG. 11591. 2  | coding    | 0. 146      | 0     | 3021  | 7480  |
| MSTRG. 11594. 3  | coding    | 0. 338      | 4608  | 6690  | 7580  |
| MSTRG. 11595. 1  | noncoding | -0. 0360448 | 0     | 264   | 666   |
| MSTRG. 11595. 2  | noncoding | -0. 0004096 | 30    | 174   | 521   |
| MSTRG. 11594. 4  | coding    | 0. 338      | 1638  | 3720  | 4472  |
| MSTRG. 11606. 4  | coding    | 0. 38       | 174   | 2814  | 3673  |
| MSTRG. 11606. 10 | coding    | 0. 382      | 339   | 3021  | 3882  |
| MSTRG. 11599. 1  | coding    | 0. 398      | 162   | 2718  | 3759  |
| MSTRG. 11599. 2  | coding    | 0. 297      | 111   | 1326  | 1600  |
| MSTRG. 11610. 1  | coding    | 0. 341      | 273   | 1635  | 1857  |
| MSTRG. 11610. 2  | coding    | 0. 341      | 195   | 1557  | 1778  |
| MSTRG. 11611. 2  | coding    | 0. 278      | 264   | 1992  | 5902  |
| MSTRG. 11611. 4  | coding    | 0. 281      | 258   | 1962  | 5893  |
| MSTRG. 11613. 1  | noncoding | -0. 0200704 | 147   | 174   | 328   |
| MSTRG. 11615. 1  | coding    | 0. 41       | 0     | 1071  | 3468  |
| MSTRG. 11616. 1  | noncoding | -0. 012288  | 216   | 327   | 484   |
| MSTRG. 11618. 2  | coding    | 0. 406      | 0     | 663   | 3304  |
| MSTRG. 11617. 1  | noncoding | -0. 0290816 | 48    | 201   | 531   |
| MSTRG. 11622. 1  | noncoding | -0. 0147456 | 2265  | 2427  | 4331  |
| MSTRG. 11622. 2  | noncoding | -0. 028672  | 138   | 252   | 1220  |
| MSTRG. 11636. 2  | coding    | 0. 073      | 720   | 1809  | 2736  |
| MSTRG. 11643. 2  | noncoding | -0. 0241664 | 4392  | 4608  | 4763  |
| MSTRG. 11643. 3  | coding    | 0. 064      | 0     | 1404  | 2083  |
| MSTRG. 11643. 4  | coding    | 0. 047      | 435   | 1569  | 2247  |
| MSTRG. 11645. 1  | noncoding | -0. 0495616 | 0     | 90    | 464   |
| MSTRG. 11646. 1  | coding    | 0. 271      | 0     | 570   | 1373  |

|                 |           |             |      |      |       |
|-----------------|-----------|-------------|------|------|-------|
| MSTRG. 11649. 4 | coding    | 0. 47       | 237  | 1479 | 4197  |
| MSTRG. 11656. 3 | coding    | 0. 521      | 0    | 1824 | 2709  |
| MSTRG. 11657. 2 | coding    | 0. 26       | 0    | 708  | 3658  |
| MSTRG. 11662. 1 | noncoding | -0. 012288  | 63   | 159  | 901   |
| MSTRG. 11663. 4 | coding    | 0. 229      | 672  | 1860 | 2574  |
| MSTRG. 11663. 3 | coding    | 0. 369      | 51   | 768  | 1516  |
| MSTRG. 11664. 2 | noncoding | -0. 073728  | 279  | 378  | 745   |
| MSTRG. 11666. 1 | coding    | 0. 205      | 1323 | 1836 | 5596  |
| MSTRG. 11666. 5 | coding    | 0. 212      | 2511 | 2976 | 3714  |
| MSTRG. 11666. 3 | coding    | 0. 171      | 492  | 936  | 1675  |
| MSTRG. 11666. 4 | coding    | 0. 134      | 456  | 1356 | 1594  |
| MSTRG. 11659. 1 | noncoding | -0. 053248  | 669  | 963  | 1118  |
| MSTRG. 11659. 2 | noncoding | -0. 0372736 | 1320 | 1533 | 1689  |
| MSTRG. 11659. 3 | noncoding | -0. 016384  | 603  | 729  | 936   |
| MSTRG. 11659. 4 | noncoding | -0. 0425984 | 5580 | 5889 | 10398 |
| MSTRG. 11674. 2 | coding    | 0. 155      | 534  | 906  | 1870  |
| MSTRG. 11675. 1 | coding    | 0. 34       | 171  | 777  | 1010  |
| MSTRG. 11675. 3 | coding    | 0. 267      | 75   | 540  | 695   |
| MSTRG. 11676. 3 | coding    | 0. 159      | 2124 | 3186 | 3470  |
| MSTRG. 11678. 1 | coding    | 0. 334      | 0    | 576  | 3631  |
| MSTRG. 11678. 5 | coding    | 0. 339      | 0    | 672  | 3486  |
| MSTRG. 11678. 3 | coding    | 0. 339      | 0    | 672  | 4324  |
| MSTRG. 11679. 1 | noncoding | -0. 180224  | 231  | 267  | 1559  |
| MSTRG. 11680. 1 | coding    | 0. 186      | 360  | 3660 | 5589  |
| MSTRG. 11680. 3 | coding    | 0. 186      | 1311 | 4611 | 5523  |
| MSTRG. 11677. 3 | coding    | 0. 206      | 1011 | 2223 | 4310  |
| MSTRG. 11683. 1 | coding    | 0. 264      | 177  | 1647 | 2688  |
| MSTRG. 11684. 1 | coding    | 0. 186      | 1524 | 4266 | 6897  |
| MSTRG. 11684. 4 | coding    | 0. 156      | 3930 | 8244 | 8749  |
| MSTRG. 11687. 2 | coding    | 0. 278      | 102  | 810  | 1121  |
| MSTRG. 11696. 1 | noncoding | -0. 0069632 | 444  | 597  | 1581  |
| MSTRG. 11697. 1 | noncoding | -0. 0765952 | 393  | 1182 | 1473  |
| MSTRG. 11697. 2 | coding    | 0. 304      | 0    | 969  | 1260  |
| MSTRG. 11702. 1 | coding    | 0. 121      | 663  | 4350 | 5242  |
| MSTRG. 11702. 3 | coding    | 0. 118      | 240  | 3963 | 4351  |
| MSTRG. 11703. 1 | noncoding | -0. 036864  | 312  | 342  | 495   |
| MSTRG. 11707. 1 | coding    | 0. 24       | 0    | 249  | 2183  |
| MSTRG. 11708. 1 | noncoding | -0. 118784  | 444  | 543  | 700   |
| MSTRG. 11708. 2 | noncoding | -0. 0290816 | 1038 | 1302 | 1889  |
| MSTRG. 11717. 1 | coding    | 0. 209      | 129  | 1092 | 2199  |
| MSTRG. 11724. 2 | coding    | 0. 129      | 249  | 1527 | 2238  |
| MSTRG. 11724. 7 | coding    | 0. 115      | 66   | 1305 | 1895  |
| MSTRG. 11724. 6 | coding    | 0. 129      | 789  | 2067 | 2658  |
| MSTRG. 11727. 1 | noncoding | -0. 0176128 | 0    | 75   | 761   |
| MSTRG. 11728. 1 | coding    | 0. 131      | 294  | 2136 | 7105  |
| MSTRG. 11731. 1 | noncoding | -0. 0004096 | 0    | 0    | 210   |
| MSTRG. 11738. 1 | coding    | 0. 092      | 0    | 2208 | 2638  |
| MSTRG. 11738. 3 | coding    | 0. 11       | 1065 | 1977 | 2407  |
| MSTRG. 11738. 4 | noncoding | -0. 0700416 | 0    | 117  | 3864  |
| MSTRG. 11738. 6 | noncoding | -0. 036864  | 2862 | 2988 | 4305  |
| MSTRG. 11738. 7 | coding    | 0. 099      | 3840 | 4803 | 5231  |
| MSTRG. 11738. 8 | coding    | 0. 099      | 2298 | 3261 | 3691  |
| MSTRG. 11738. 9 | coding    | 0. 096      | 1383 | 2235 | 2797  |
| MSTRG. 11734. 3 | coding    | 0. 444      | 0    | 1068 | 4234  |

|                  |           |             |       |       |       |
|------------------|-----------|-------------|-------|-------|-------|
| MSTRG. 11737. 2  | noncoding | -0. 065536  | 369   | 468   | 657   |
| MSTRG. 11739. 1  | coding    | 0. 108      | 0     | 318   | 1867  |
| MSTRG. 11745. 7  | coding    | 0. 085      | 528   | 3555  | 6734  |
| MSTRG. 11745. 8  | noncoding | -0. 0806912 | 309   | 384   | 1098  |
| MSTRG. 11746. 1  | coding    | 0. 044      | 1182  | 1539  | 2153  |
| MSTRG. 11747. 1  | noncoding | -0. 008192  | 186   | 297   | 1439  |
| MSTRG. 11763. 3  | noncoding | -0. 012288  | 1503  | 1641  | 1873  |
| MSTRG. 11763. 4  | coding    | 0. 066      | 129   | 1593  | 1905  |
| MSTRG. 11764. 1  | noncoding | -0. 0438272 | 81    | 312   | 1314  |
| MSTRG. 11763. 5  | coding    | 0. 387      | 0     | 546   | 1799  |
| MSTRG. 11765. 1  | noncoding | -0. 0253952 | 1416  | 1473  | 1815  |
| MSTRG. 11763. 7  | noncoding | -0. 008192  | 480   | 873   | 1171  |
| MSTRG. 11756. 2  | coding    | 0. 262      | 0     | 5013  | 8007  |
| MSTRG. 11756. 6  | coding    | 0. 26       | 0     | 4038  | 4490  |
| MSTRG. 11761. 1  | noncoding | -0. 028672  | 462   | 492   | 863   |
| MSTRG. 11782. 1  | noncoding | -0. 036864  | 7578  | 7641  | 10628 |
| MSTRG. 11783. 1  | coding    | 0. 295      | 420   | 753   | 2871  |
| MSTRG. 11783. 4  | noncoding | -0. 131072  | 531   | 879   | 1755  |
| MSTRG. 11783. 3  | coding    | 0. 186      | 0     | 702   | 1578  |
| MSTRG. 11792. 1  | coding    | 0. 093      | 0     | 1383  | 7174  |
| MSTRG. 11792. 3  | coding    | 0. 074      | 828   | 1581  | 4177  |
| MSTRG. 11792. 2  | coding    | 0. 1        | 0     | 1512  | 3975  |
| MSTRG. 11792. 4  | coding    | 0. 104      | 0     | 1425  | 1844  |
| MSTRG. 11792. 13 | coding    | 0. 027      | 3147  | 3312  | 8311  |
| MSTRG. 11793. 1  | noncoding | -0. 0004096 | 0     | 0     | 618   |
| MSTRG. 11794. 1  | noncoding | -0. 0794624 | 2592  | 2691  | 4649  |
| MSTRG. 11785. 1  | coding    | 0. 381      | 0     | 237   | 2947  |
| MSTRG. 11786. 2  | noncoding | -0. 026624  | 60    | 261   | 570   |
| MSTRG. 11788. 1  | coding    | 0. 183      | 180   | 987   | 1434  |
| MSTRG. 11788. 2  | coding    | 0. 183      | 348   | 1155  | 1602  |
| MSTRG. 11788. 4  | coding    | 0. 183      | 120   | 927   | 1226  |
| MSTRG. 11795. 1  | noncoding | -0. 008192  | 783   | 828   | 1049  |
| MSTRG. 11805. 1  | noncoding | -0. 14336   | 63    | 87    | 262   |
| MSTRG. 11806. 1  | coding    | 0. 095      | 306   | 3579  | 4648  |
| MSTRG. 11807. 1  | noncoding | -0. 036864  | 294   | 339   | 1580  |
| MSTRG. 11810. 2  | coding    | 0. 023      | 360   | 1137  | 2124  |
| MSTRG. 11814. 4  | coding    | 0. 197      | 618   | 1206  | 1363  |
| MSTRG. 11800. 1  | noncoding | -0. 0274432 | 39    | 201   | 777   |
| MSTRG. 11802. 3  | noncoding | -0. 12288   | 0     | 441   | 932   |
| MSTRG. 11802. 4  | coding    | 0. 404      | 0     | 405   | 772   |
| MSTRG. 11802. 5  | coding    | 0. 337      | 2646  | 3156  | 3396  |
| MSTRG. 11820. 3  | coding    | 0. 445      | 114   | 1797  | 3766  |
| MSTRG. 11819. 1  | noncoding | -0. 0012288 | 159   | 288   | 806   |
| MSTRG. 11834. 2  | coding    | 0. 257      | 0     | 1137  | 1411  |
| MSTRG. 11834. 3  | coding    | 0. 166      | 0     | 606   | 1412  |
| MSTRG. 11838. 1  | noncoding | -0. 008192  | 465   | 549   | 1533  |
| MSTRG. 11841. 4  | noncoding | -0. 22528   | 1260  | 1284  | 2559  |
| MSTRG. 11842. 3  | coding    | 0. 083      | 3000  | 5184  | 5576  |
| MSTRG. 11842. 6  | coding    | 0. 083      | 1449  | 3633  | 4023  |
| MSTRG. 11821. 2  | noncoding | -0. 0589824 | 690   | 1194  | 3285  |
| MSTRG. 11824. 2  | noncoding | -0. 0372736 | 9657  | 9852  | 12045 |
| MSTRG. 11824. 3  | noncoding | -0. 0512    | 15378 | 15615 | 16861 |
| MSTRG. 11824. 4  | noncoding | -0. 0319488 | 1530  | 1686  | 3269  |
| MSTRG. 11824. 5  | noncoding | -0. 0372736 | 9657  | 9852  | 22513 |

|                 |           |             |      |      |       |
|-----------------|-----------|-------------|------|------|-------|
| MSTRG. 11825. 3 | coding    | 0. 064      | 294  | 1347 | 1512  |
| MSTRG. 11825. 4 | coding    | 0. 075      | 42   | 636  | 1611  |
| MSTRG. 11827. 1 | noncoding | -0. 0114688 | 0    | 84   | 296   |
| MSTRG. 11827. 3 | noncoding | -0. 016384  | 435  | 564  | 717   |
| MSTRG. 11827. 2 | noncoding | -0. 0598016 | 435  | 717  | 918   |
| MSTRG. 11828. 1 | noncoding | -0. 0004096 | 0    | 0    | 201   |
| MSTRG. 11847. 2 | coding    | 0. 214      | 420  | 1737 | 2074  |
| MSTRG. 11852. 1 | coding    | 0. 093      | 0    | 807  | 4016  |
| MSTRG. 11852. 2 | coding    | 0. 247      | 36   | 300  | 1320  |
| MSTRG. 11852. 3 | coding    | 0. 136      | 9    | 804  | 2077  |
| MSTRG. 11852. 4 | noncoding | -0. 0397312 | 909  | 1089 | 1477  |
| MSTRG. 11852. 5 | noncoding | -0. 0483328 | 729  | 957  | 2667  |
| MSTRG. 11860. 1 | noncoding | -0. 098304  | 387  | 420  | 679   |
| MSTRG. 11861. 1 | coding    | 0. 36       | 60   | 1083 | 1840  |
| MSTRG. 11854. 1 | noncoding | -0. 004096  | 0    | 231  | 386   |
| MSTRG. 11867. 3 | coding    | 0. 188      | 417  | 999  | 4018  |
| MSTRG. 11867. 4 | noncoding | -0. 018432  | 168  | 321  | 592   |
| MSTRG. 11867. 5 | noncoding | -0. 065536  | 204  | 240  | 507   |
| MSTRG. 11872. 1 | coding    | 0. 149      | 450  | 1362 | 2033  |
| MSTRG. 11873. 2 | coding    | 0. 431      | 159  | 777  | 1594  |
| MSTRG. 11873. 4 | coding    | 0. 441      | 159  | 750  | 1968  |
| MSTRG. 11873. 3 | coding    | 0. 352      | 159  | 1611 | 5734  |
| MSTRG. 11873. 7 | coding    | 0. 32       | 0    | 633  | 5405  |
| MSTRG. 11873. 8 | coding    | 0. 346      | 0    | 519  | 2004  |
| MSTRG. 11873. 6 | coding    | 0. 309      | 0    | 936  | 1716  |
| MSTRG. 11875. 1 | noncoding | -0. 0356352 | 135  | 297  | 453   |
| MSTRG. 11876. 1 | coding    | 0. 116      | 0    | 1119 | 3640  |
| MSTRG. 11876. 3 | coding    | 0. 253      | 1485 | 2460 | 4195  |
| MSTRG. 11882. 3 | noncoding | -0. 016384  | 1743 | 1929 | 3069  |
| MSTRG. 11882. 4 | coding    | 0. 04       | 1785 | 1971 | 3111  |
| MSTRG. 11889. 1 | coding    | 0. 394      | 12   | 2898 | 4324  |
| MSTRG. 11889. 2 | coding    | 0. 404      | 0    | 2823 | 5020  |
| MSTRG. 11890. 1 | noncoding | -0. 004096  | 267  | 399  | 633   |
| MSTRG. 11901. 1 | noncoding | -0. 0004096 | 1158 | 1281 | 3458  |
| MSTRG. 11901. 2 | noncoding | -0. 0004096 | 1353 | 1476 | 2615  |
| MSTRG. 11902. 1 | noncoding | -0. 0004096 | 192  | 192  | 490   |
| MSTRG. 11923. 1 | noncoding | -0. 0344064 | 0    | 102  | 332   |
| MSTRG. 11924. 1 | noncoding | -0. 0139264 | 153  | 270  | 688   |
| MSTRG. 11929. 1 | noncoding | -0. 03072   | 0    | 126  | 447   |
| MSTRG. 11950. 1 | noncoding | -0. 0004096 | 0    | 0    | 366   |
| MSTRG. 11951. 1 | noncoding | -0. 0425984 | 150  | 297  | 1397  |
| MSTRG. 11960. 1 | noncoding | -0. 0155648 | 297  | 309  | 699   |
| MSTRG. 11968. 1 | coding    | 0. 07       | 8556 | 8778 | 10591 |
| MSTRG. 11969. 1 | noncoding | -0. 0016384 | 5091 | 5241 | 6336  |
| MSTRG. 11970. 1 | noncoding | -0. 0380928 | 4464 | 4644 | 11970 |
| MSTRG. 11973. 4 | coding    | 0. 581      | 99   | 1371 | 1533  |
| MSTRG. 11973. 3 | coding    | 0. 586      | 132  | 1392 | 1554  |
| MSTRG. 11973. 2 | coding    | 0. 273      | 78   | 396  | 558   |
| MSTRG. 11973. 1 | coding    | 0. 569      | 0    | 1350 | 1512  |
| MSTRG. 11974. 1 | coding    | 0. 385      | 156  | 1452 | 1698  |
| MSTRG. 11974. 2 | coding    | 0. 38       | 0    | 1329 | 1560  |
| MSTRG. 11974. 3 | coding    | 0. 399      | 0    | 1275 | 1519  |
| MSTRG. 11973. 7 | noncoding | -0. 200704  | 39   | 90   | 244   |
| MSTRG. 11973. 8 | noncoding | -0. 094208  | 0    | 99   | 426   |

|                  |           |             |      |      |       |
|------------------|-----------|-------------|------|------|-------|
| MSTRG. 11973. 9  | noncoding | -0. 0172032 | 0    | 168  | 2213  |
| MSTRG. 11973. 10 | noncoding | -0. 069632  | 0    | 108  | 276   |
| MSTRG. 11973. 11 | noncoding | -0. 036864  | 0    | 123  | 364   |
| MSTRG. 11973. 12 | noncoding | -0. 151552  | 0    | 54   | 211   |
| MSTRG. 11973. 13 | noncoding | -0. 077824  | 0    | 108  | 600   |
| MSTRG. 11973. 14 | noncoding | -0. 065536  | 0    | 111  | 608   |
| MSTRG. 11973. 15 | noncoding | -0. 0192512 | 0    | 174  | 754   |
| MSTRG. 11973. 16 | noncoding | -0. 0004096 | 123  | 255  | 497   |
| MSTRG. 11973. 17 | noncoding | -0. 094208  | 0    | 99   | 254   |
| MSTRG. 11973. 18 | noncoding | -0. 0499712 | 0    | 120  | 399   |
| MSTRG. 11973. 19 | noncoding | -0. 208896  | 0    | 36   | 222   |
| MSTRG. 11973. 20 | noncoding | -0. 057344  | 36   | 114  | 355   |
| MSTRG. 11973. 21 | noncoding | -0. 110592  | 0    | 75   | 390   |
| MSTRG. 11973. 22 | noncoding | -0. 110592  | 0    | 72   | 367   |
| MSTRG. 11973. 23 | noncoding | -0. 200704  | 0    | 51   | 338   |
| MSTRG. 11973. 24 | noncoding | -0. 098304  | 0    | 84   | 329   |
| MSTRG. 11958. 1  | coding    | 0. 192      | 579  | 1929 | 4650  |
| MSTRG. 11958. 2  | coding    | 0. 195      | 684  | 2043 | 4762  |
| MSTRG. 11972. 1  | noncoding | -0. 0663552 | 4785 | 5151 | 5457  |
| MSTRG. 11978. 2  | coding    | 0. 287      | 0    | 456  | 710   |
| MSTRG. 11978. 1  | coding    | 0. 326      | 0    | 2880 | 6706  |
| MSTRG. 11979. 1  | noncoding | -0. 0618496 | 177  | 261  | 497   |
| MSTRG. 11978. 4  | coding    | 0. 326      | 0    | 2523 | 7302  |
| MSTRG. 11978. 5  | coding    | 0. 326      | 0    | 2514 | 7481  |
| MSTRG. 11985. 2  | coding    | 0. 112      | 237  | 9588 | 10252 |
| MSTRG. 11986. 4  | coding    | 0. 298      | 1152 | 2190 | 2530  |
| MSTRG. 11987. 1  | noncoding | -0. 0118784 | 378  | 426  | 839   |
| MSTRG. 11995. 1  | coding    | 0. 148      | 225  | 5607 | 5816  |
| MSTRG. 11996. 1  | noncoding | -0. 0139264 | 981  | 1038 | 2981  |
| MSTRG. 11995. 6  | coding    | 0. 148      | 147  | 5529 | 6942  |
| MSTRG. 11995. 5  | coding    | 0. 127      | 897  | 4494 | 10021 |
| MSTRG. 11995. 7  | coding    | 0. 16       | 1656 | 5790 | 8996  |
| MSTRG. 11995. 8  | coding    | 0. 16       | 1281 | 5415 | 5607  |
| MSTRG. 11995. 9  | coding    | 0. 16       | 1443 | 5577 | 5765  |
| MSTRG. 11991. 1  | noncoding | -0. 094208  | 1389 | 1470 | 6406  |
| MSTRG. 11994. 2  | coding    | 0. 161      | 339  | 1224 | 1610  |
| MSTRG. 11994. 3  | coding    | 0. 154      | 267  | 1119 | 1483  |
| MSTRG. 12000. 1  | coding    | 0. 039      | 2829 | 3273 | 4986  |
| MSTRG. 12004. 5  | coding    | 0. 057      | 3954 | 5304 | 10116 |
| MSTRG. 12004. 6  | coding    | 0. 201      | 0    | 1140 | 8900  |
| MSTRG. 12004. 7  | coding    | 0. 05       | 1731 | 2112 | 2631  |
| MSTRG. 12004. 8  | coding    | 0. 037      | 627  | 1434 | 1954  |
| MSTRG. 12004. 9  | coding    | 0. 066      | 645  | 1875 | 2363  |
| MSTRG. 12004. 10 | coding    | 0. 057      | 396  | 1746 | 1978  |
| MSTRG. 12005. 1  | noncoding | -0. 016384  | 1371 | 1452 | 2940  |
| MSTRG. 12004. 11 | coding    | 0. 189      | 78   | 1083 | 1238  |
| MSTRG. 12006. 4  | coding    | 0. 15       | 531  | 1326 | 2522  |
| MSTRG. 12007. 1  | noncoding | -0. 086016  | 60   | 135  | 674   |
| MSTRG. 12008. 1  | noncoding | -0. 0004096 | 0    | 0    | 415   |
| MSTRG. 12009. 1  | noncoding | -0. 06144   | 99   | 144  | 299   |
| MSTRG. 12019. 2  | noncoding | -0. 006144  | 294  | 435  | 838   |
| MSTRG. 12019. 3  | noncoding | -0. 0196608 | 270  | 426  | 791   |
| MSTRG. 12027. 2  | coding    | 0. 241      | 78   | 597  | 3763  |
| MSTRG. 12023. 1  | coding    | 0. 134      | 0    | 1038 | 4083  |

|                |           |            |      |       |       |
|----------------|-----------|------------|------|-------|-------|
| MSTRG.12030.1  | coding    | 0.362      | 0    | 1311  | 2287  |
| MSTRG.12030.3  | coding    | 0.354      | 666  | 1608  | 2584  |
| MSTRG.12034.4  | coding    | 0.116      | 279  | 1398  | 1737  |
| MSTRG.12035.1  | coding    | 0.397      | 342  | 4041  | 4468  |
| MSTRG.12039.1  | noncoding | -0.0004096 | 0    | 57    | 936   |
| MSTRG.12040.1  | noncoding | -0.045056  | 3060 | 3138  | 4121  |
| MSTRG.12041.3  | coding    | 0.59       | 0    | 2451  | 3364  |
| MSTRG.12042.1  | noncoding | -0.049152  | 1536 | 1617  | 5931  |
| MSTRG.12043.1  | noncoding | -0.0200704 | 1320 | 1575  | 5105  |
| MSTRG.12044.1  | noncoding | -0.0438272 | 2730 | 2940  | 4867  |
| MSTRG.12045.3  | coding    | 0.281      | 1254 | 2460  | 3373  |
| MSTRG.12045.4  | coding    | 0.305      | 0    | 4494  | 5406  |
| MSTRG.12047.3  | coding    | 0.413      | 309  | 1737  | 1893  |
| MSTRG.12053.2  | coding    | 0.293      | 372  | 1011  | 2200  |
| MSTRG.12053.3  | coding    | 0.293      | 1221 | 1860  | 6639  |
| MSTRG.12054.1  | noncoding | -0.0823296 | 1206 | 1392  | 4529  |
| MSTRG.12057.4  | noncoding | -0.0417792 | 72   | 330   | 712   |
| MSTRG.12055.5  | noncoding | -0.0811008 | 3285 | 3525  | 6420  |
| MSTRG.12055.6  | noncoding | -0.034816  | 3456 | 3849  | 9077  |
| MSTRG.12055.7  | noncoding | -0.069632  | 816  | 909   | 1064  |
| MSTRG.12055.8  | noncoding | -0.0425984 | 2646 | 2823  | 12406 |
| MSTRG.12055.9  | noncoding | -0.008192  | 789  | 873   | 4767  |
| MSTRG.12055.10 | noncoding | -0.0192512 | 789  | 834   | 1898  |
| MSTRG.12055.11 | noncoding | -0.0290816 | 1515 | 1830  | 2869  |
| MSTRG.12055.12 | noncoding | -0.155648  | 1521 | 1563  | 2418  |
| MSTRG.12055.13 | coding    | 0.044      | 2610 | 2775  | 9720  |
| MSTRG.12055.14 | noncoding | -0.049152  | 6075 | 6195  | 21455 |
| MSTRG.12059.1  | noncoding | -0.008192  | 228  | 432   | 7323  |
| MSTRG.12049.1  | noncoding | -0.0253952 | 303  | 450   | 696   |
| MSTRG.12050.1  | noncoding | -0.045056  | 435  | 528   | 923   |
| MSTRG.12051.1  | noncoding | -0.172032  | 318  | 345   | 587   |
| MSTRG.12069.1  | noncoding | -0.0073728 | 1119 | 1314  | 2497  |
| MSTRG.12069.2  | coding    | 0.424      | 765  | 2076  | 10380 |
| MSTRG.12069.5  | coding    | 0.358      | 420  | 1059  | 2038  |
| MSTRG.12070.1  | noncoding | -0.028672  | 816  | 1536  | 12775 |
| MSTRG.12069.7  | noncoding | -0.012288  | 1872 | 1956  | 3219  |
| MSTRG.12072.3  | coding    | 0.547      | 0    | 1836  | 2273  |
| MSTRG.12072.10 | coding    | 0.524      | 60   | 1920  | 2355  |
| MSTRG.12072.9  | coding    | 0.529      | 1815 | 3678  | 4114  |
| MSTRG.12072.12 | coding    | 0.522      | 8217 | 10182 | 11355 |
| MSTRG.12080.1  | coding    | 0.427      | 66   | 2307  | 2763  |
| MSTRG.12079.1  | noncoding | -0.02048   | 252  | 264   | 445   |
| MSTRG.12088.1  | noncoding | -0.0004096 | 0    | 126   | 647   |
| MSTRG.12093.2  | coding    | 0.214      | 138  | 1932  | 6139  |
| MSTRG.12095.3  | coding    | 0.229      | 0    | 1500  | 2180  |
| MSTRG.12098.1  | coding    | 0.077      | 1683 | 2586  | 5531  |
| MSTRG.12099.2  | coding    | 0.378      | 0    | 993   | 2889  |
| MSTRG.12096.1  | noncoding | -0.110592  | 87   | 138   | 292   |
| MSTRG.12100.1  | coding    | 0.148      | 2637 | 4446  | 4972  |
| MSTRG.12100.2  | coding    | 0.119      | 1332 | 4491  | 5002  |
| MSTRG.12100.3  | coding    | 0.202      | 2736 | 3942  | 5160  |
| MSTRG.12102.1  | noncoding | -0.032768  | 243  | 288   | 442   |
| MSTRG.12108.4  | coding    | 0.279      | 288  | 6972  | 7468  |
| MSTRG.12108.1  | coding    | 0.282      | 288  | 7035  | 7646  |

|                 |           |            |      |      |      |
|-----------------|-----------|------------|------|------|------|
| MSTRG. 12108.9  | coding    | 0.285      | 618  | 7110 | 7721 |
| MSTRG. 12108.8  | coding    | 0.279      | 288  | 6972 | 8044 |
| MSTRG. 12108.12 | coding    | 0.111      | 66   | 597  | 753  |
| MSTRG. 12104.3  | coding    | 0.488      | 501  | 3018 | 3254 |
| MSTRG. 12121.2  | coding    | 0.749      | 0    | 264  | 1452 |
| MSTRG. 12121.5  | coding    | 0.203      | 0    | 1101 | 1256 |
| MSTRG. 12123.5  | coding    | 0.221      | 207  | 1392 | 1614 |
| MSTRG. 12123.2  | coding    | 0.221      | 465  | 1650 | 1873 |
| MSTRG. 12123.4  | coding    | 0.225      | 0    | 1632 | 1854 |
| MSTRG. 12123.1  | coding    | 0.221      | 1002 | 2187 | 2410 |
| MSTRG. 12123.3  | coding    | 0.178      | 84   | 1836 | 2058 |
| MSTRG. 12123.6  | noncoding | -0.012288  | 6    | 144  | 472  |
| MSTRG. 12124.1  | noncoding | -0.004096  | 114  | 411  | 567  |
| MSTRG. 12124.2  | noncoding | -0.034816  | 93   | 2019 | 2175 |
| MSTRG. 12125.1  | coding    | 0.522      | 39   | 483  | 638  |
| MSTRG. 12114.2  | coding    | 0.573      | 1377 | 1791 | 2331 |
| MSTRG. 12130.3  | coding    | 0.401      | 1452 | 2910 | 3468 |
| MSTRG. 12131.1  | noncoding | -0.0319488 | 0    | 72   | 598  |
| MSTRG. 12138.1  | noncoding | -0.114688  | 0    | 210  | 1258 |
| MSTRG. 12145.1  | noncoding | -0.0479232 | 1191 | 1542 | 1795 |
| MSTRG. 12146.1  | noncoding | -0.0126976 | 141  | 318  | 474  |
| MSTRG. 12147.1  | noncoding | -0.04096   | 198  | 288  | 443  |
| MSTRG. 12152.1  | noncoding | -0.0032768 | 0    | 120  | 712  |
| MSTRG. 12153.2  | noncoding | -0.0618496 | 0    | 345  | 1671 |
| MSTRG. 12157.3  | coding    | 0.175      | 1365 | 1539 | 2455 |
| MSTRG. 12157.4  | coding    | 0.197      | 0    | 909  | 1823 |
| MSTRG. 12157.2  | noncoding | -0.1015808 | 0    | 1218 | 2133 |
| MSTRG. 12157.5  | coding    | 0.21       | 0    | 315  | 672  |
| MSTRG. 12159.2  | coding    | 0.12       | 123  | 660  | 3165 |
| MSTRG. 12159.1  | coding    | 0.135      | 123  | 960  | 1877 |
| MSTRG. 12159.3  | coding    | 0.13       | 87   | 528  | 1134 |
| MSTRG. 12160.1  | noncoding | -0.0499712 | 3474 | 4020 | 7134 |
| MSTRG. 12161.1  | noncoding | -0.0712704 | 570  | 723  | 1487 |
| MSTRG. 12168.3  | noncoding | -0.0372736 | 2562 | 2736 | 3366 |
| MSTRG. 12188.1  | noncoding | -0.0380928 | 42   | 252  | 665  |
| MSTRG. 12189.1  | noncoding | -0.188416  | 1341 | 1410 | 1567 |
| MSTRG. 12189.3  | noncoding | -0.1277952 | 0    | 225  | 2433 |
| MSTRG. 12195.1  | noncoding | -0.057344  | 7680 | 7776 | 7929 |
| MSTRG. 12196.1  | noncoding | -0.016384  | 552  | 675  | 2274 |
| MSTRG. 12197.2  | noncoding | -0.118784  | 852  | 909  | 1760 |
| MSTRG. 12197.3  | coding    | 0.075      | 0    | 1308 | 3135 |
| MSTRG. 12197.4  | coding    | 0.083      | 2403 | 3858 | 4138 |
| MSTRG. 12197.5  | noncoding | -0.083968  | 2847 | 3342 | 4186 |
| MSTRG. 12198.1  | noncoding | -0.02048   | 1356 | 1437 | 3164 |
| MSTRG. 12202.1  | noncoding | -0.04096   | 57   | 63   | 217  |
| MSTRG. 12233.1  | noncoding | -0.0253952 | 1236 | 1254 | 1742 |
| MSTRG. 12238.1  | noncoding | -0.16384   | 3837 | 3873 | 4955 |
| MSTRG. 12246.2  | noncoding | -0.0405504 | 3873 | 4257 | 4677 |
| MSTRG. 12208.1  | noncoding | -0.0598016 | 0    | 63   | 523  |
| MSTRG. 12214.5  | noncoding | -0.0106496 | 2889 | 3015 | 9228 |
| MSTRG. 12214.6  | noncoding | -0.004096  | 1254 | 1419 | 1700 |
| MSTRG. 12214.8  | coding    | 0.14       | 2343 | 2685 | 4234 |
| MSTRG. 12215.1  | noncoding | -0.0446464 | 327  | 444  | 1417 |
| MSTRG. 12207.1  | noncoding | -0.04096   | 45   | 255  | 1664 |



|               |           |            |       |       |       |
|---------------|-----------|------------|-------|-------|-------|
| MSTRG.12218.5 | coding    | 0.267      | 600   | 1455  | 2335  |
| MSTRG.12218.6 | coding    | 0.267      | 483   | 1338  | 2217  |
| MSTRG.12224.1 | noncoding | -0.036864  | 786   | 849   | 1025  |
| MSTRG.12228.1 | coding    | 0.204      | 72    | 900   | 1074  |
| MSTRG.12274.1 | noncoding | -0.0458752 | 0     | 51    | 414   |
| MSTRG.12277.1 | noncoding | -0.0028672 | 684   | 918   | 7243  |
| MSTRG.12278.2 | noncoding | -0.0401408 | 60    | 234   | 388   |
| MSTRG.12279.1 | noncoding | -0.0647168 | 543   | 1332  | 1774  |
| MSTRG.12280.1 | coding    | 0.066      | 2358  | 3336  | 4965  |
| MSTRG.12280.2 | noncoding | -0.0479232 | 72    | 609   | 8008  |
| MSTRG.12280.3 | noncoding | -0.0479232 | 72    | 609   | 4293  |
| MSTRG.12281.1 | noncoding | -0.0315392 | 579   | 1602  | 2042  |
| MSTRG.12281.2 | noncoding | -0.065536  | 1608  | 1932  | 2919  |
| MSTRG.12285.2 | coding    | 0.169      | 0     | 1107  | 2253  |
| MSTRG.12288.2 | coding    | 0.229      | 45    | 1368  | 1581  |
| MSTRG.12288.3 | coding    | 0.217      | 60    | 1821  | 2024  |
| MSTRG.12302.2 | coding    | 0.202      | 0     | 984   | 1647  |
| MSTRG.12303.1 | noncoding | -0.04096   | 144   | 261   | 1269  |
| MSTRG.12302.3 | coding    | 0.202      | 0     | 984   | 2913  |
| MSTRG.12302.4 | coding    | 0.052      | 0     | 618   | 1201  |
| MSTRG.12302.5 | coding    | 0.202      | 0     | 984   | 2178  |
| MSTRG.12320.2 | coding    | 0.236      | 3720  | 4305  | 4462  |
| MSTRG.12320.4 | coding    | 0.256      | 3636  | 4185  | 4338  |
| MSTRG.12320.5 | coding    | 0.06       | 5814  | 6240  | 7520  |
| MSTRG.12320.7 | coding    | 0.06       | 2343  | 2769  | 4101  |
| MSTRG.12322.1 | coding    | 0.165      | 0     | 4011  | 8462  |
| MSTRG.12323.1 | noncoding | -0.0004096 | 270   | 360   | 930   |
| MSTRG.12322.3 | coding    | 0.043      | 150   | 375   | 719   |
| MSTRG.12347.5 | coding    | 0.029      | 120   | 5535  | 6775  |
| MSTRG.12347.6 | coding    | 0.023      | 120   | 5598  | 10564 |
| MSTRG.12347.7 | coding    | 0.059      | 6162  | 6915  | 10374 |
| MSTRG.12347.8 | coding    | 0.064      | 5178  | 5820  | 6116  |
| MSTRG.12351.1 | noncoding | -0.086016  | 465   | 522   | 1882  |
| MSTRG.12352.1 | noncoding | -0.004096  | 330   | 471   | 963   |
| MSTRG.12340.2 | coding    | 0.07       | 669   | 2292  | 3009  |
| MSTRG.12340.4 | coding    | 0.07       | 900   | 2523  | 2956  |
| MSTRG.12340.3 | coding    | 0.087      | 1128  | 1860  | 3458  |
| MSTRG.12341.1 | noncoding | -0.0098304 | 2997  | 3183  | 4798  |
| MSTRG.12342.1 | noncoding | -0.049152  | 2031  | 2136  | 2550  |
| MSTRG.12353.1 | noncoding | -0.043008  | 0     | 39    | 408   |
| MSTRG.12356.1 | noncoding | -0.0106496 | 258   | 378   | 587   |
| MSTRG.12355.2 | coding    | 0.163      | 0     | 1065  | 2518  |
| MSTRG.12360.3 | coding    | 0.39       | 0     | 1341  | 5210  |
| MSTRG.12359.1 | noncoding | -0.0442368 | 0     | 102   | 277   |
| MSTRG.12416.1 | noncoding | -0.0004096 | 528   | 651   | 2328  |
| MSTRG.12425.1 | coding    | 0.081      | 438   | 711   | 1161  |
| MSTRG.12426.2 | noncoding | -0.016384  | 13632 | 13767 | 14279 |
| MSTRG.12433.1 | noncoding | -0.155648  | 927   | 933   | 2024  |
| MSTRG.12434.4 | coding    | 0.097      | 0     | 7182  | 7554  |
| MSTRG.12434.5 | coding    | 0.096      | 1971  | 9084  | 9457  |
| MSTRG.12434.7 | coding    | 0.099      | 0     | 7284  | 7656  |
| MSTRG.12434.8 | coding    | 0.109      | 1962  | 7725  | 8098  |
| MSTRG.12435.2 | coding    | 0.19       | 108   | 1686  | 2197  |
| MSTRG.12439.2 | coding    | 0.135      | 192   | 1716  | 3322  |

|                 |           |             |      |      |       |
|-----------------|-----------|-------------|------|------|-------|
| MSTRG. 12440. 1 | noncoding | -0. 0110592 | 2397 | 2571 | 6524  |
| MSTRG. 12441. 1 | noncoding | -0. 0237568 | 6402 | 6486 | 8970  |
| MSTRG. 12442. 1 | noncoding | -0. 016384  | 2586 | 2718 | 5460  |
| MSTRG. 12442. 2 | noncoding | -0. 016384  | 1911 | 2043 | 5923  |
| MSTRG. 12441. 2 | noncoding | -0. 0237568 | 4626 | 4710 | 7173  |
| MSTRG. 12439. 3 | noncoding | -0. 086016  | 4215 | 4302 | 5173  |
| MSTRG. 12439. 4 | coding    | 0. 035      | 1161 | 1461 | 6643  |
| MSTRG. 12384. 2 | coding    | 0. 236      | 1380 | 3018 | 4324  |
| MSTRG. 12384. 1 | coding    | 0. 227      | 1380 | 2850 | 4238  |
| MSTRG. 12384. 3 | coding    | 0. 32       | 369  | 1299 | 2509  |
| MSTRG. 12389. 1 | noncoding | -0. 0192512 | 252  | 462  | 1043  |
| MSTRG. 12390. 3 | coding    | 0. 08       | 369  | 1110 | 1349  |
| MSTRG. 12391. 1 | coding    | 0. 137      | 3516 | 3849 | 5150  |
| MSTRG. 12391. 2 | coding    | 0. 116      | 2712 | 2961 | 3116  |
| MSTRG. 12392. 1 | noncoding | -0. 004096  | 51   | 102  | 353   |
| MSTRG. 12395. 1 | noncoding | -0. 0086016 | 114  | 252  | 427   |
| MSTRG. 12407. 1 | coding    | 0. 109      | 210  | 855  | 2049  |
| MSTRG. 12400. 2 | noncoding | -0. 004096  | 1158 | 1353 | 1509  |
| MSTRG. 12447. 5 | coding    | 0. 212      | 198  | 2844 | 4009  |
| MSTRG. 12448. 1 | coding    | 0. 001      | 1227 | 1383 | 2203  |
| MSTRG. 12449. 1 | noncoding | -0. 022528  | 1734 | 1857 | 5588  |
| MSTRG. 12450. 1 | noncoding | -0. 02048   | 3129 | 3303 | 7779  |
| MSTRG. 12444. 1 | noncoding | -0. 02048   | 441  | 612  | 1615  |
| MSTRG. 12445. 2 | noncoding | -0. 0520192 | 216  | 417  | 775   |
| MSTRG. 12474. 3 | noncoding | -0. 0114688 | 483  | 636  | 1438  |
| MSTRG. 12474. 5 | noncoding | -0. 0262144 | 327  | 546  | 1365  |
| MSTRG. 12474. 2 | noncoding | -0. 0106496 | 162  | 330  | 1147  |
| MSTRG. 12474. 4 | noncoding | -0. 0262144 | 918  | 1137 | 1954  |
| MSTRG. 12474. 1 | noncoding | -0. 0057344 | 264  | 405  | 1224  |
| MSTRG. 12474. 7 | noncoding | -0. 0262144 | 345  | 564  | 1370  |
| MSTRG. 12474. 6 | noncoding | -0. 0151552 | 168  | 348  | 1138  |
| MSTRG. 12474. 9 | noncoding | -0. 0262144 | 660  | 879  | 1505  |
| MSTRG. 12474. 8 | noncoding | -0. 0057344 | 342  | 483  | 1110  |
| MSTRG. 12475. 1 | coding    | 0. 074      | 1065 | 1317 | 2887  |
| MSTRG. 12475. 2 | coding    | 0. 074      | 957  | 1209 | 2780  |
| MSTRG. 12475. 3 | coding    | 0. 074      | 960  | 1212 | 2784  |
| MSTRG. 12475. 5 | coding    | 0. 074      | 3354 | 3606 | 5176  |
| MSTRG. 12476. 1 | coding    | 0. 103      | 0    | 1632 | 2800  |
| MSTRG. 12476. 2 | coding    | 0. 103      | 0    | 1632 | 2222  |
| MSTRG. 12476. 3 | coding    | 0. 108      | 0    | 1695 | 3191  |
| MSTRG. 12476. 7 | coding    | 0. 126      | 0    | 1335 | 2395  |
| MSTRG. 12476. 8 | coding    | 0. 128      | 0    | 1608 | 2492  |
| MSTRG. 12476. 6 | coding    | 0. 127      | 0    | 1170 | 2231  |
| MSTRG. 12476. 9 | coding    | 0. 126      | 216  | 1530 | 2414  |
| MSTRG. 12494. 1 | noncoding | -0. 012288  | 1311 | 1410 | 2751  |
| MSTRG. 12495. 1 | noncoding | -0. 004096  | 624  | 726  | 2235  |
| MSTRG. 12495. 2 | noncoding | -0. 0364544 | 0    | 162  | 3721  |
| MSTRG. 12504. 1 | noncoding | -0. 249856  | 351  | 402  | 557   |
| MSTRG. 12504. 2 | noncoding | -0. 290816  | 660  | 705  | 858   |
| MSTRG. 12505. 1 | coding    | 0. 084      | 1470 | 1695 | 14178 |
| MSTRG. 12506. 1 | noncoding | -0. 012288  | 3111 | 3225 | 5354  |
| MSTRG. 12507. 1 | noncoding | -0. 0004096 | 9    | 72   | 449   |
| MSTRG. 12505. 2 | coding    | 0. 023      | 2697 | 2868 | 4118  |
| MSTRG. 12501. 1 | coding    | 0. 193      | 0    | 3678 | 4254  |

|               |           |            |      |      |       |
|---------------|-----------|------------|------|------|-------|
| MSTRG.12501.3 | coding    | 0.11       | 426  | 771  | 1242  |
| MSTRG.12509.1 | noncoding | -0.028672  | 1083 | 1290 | 1796  |
| MSTRG.12510.2 | coding    | 0.078      | 0    | 2274 | 2764  |
| MSTRG.12510.3 | coding    | 0.064      | 672  | 2685 | 6952  |
| MSTRG.12510.4 | coding    | 0.064      | 480  | 2016 | 2507  |
| MSTRG.12517.3 | coding    | 0.17       | 0    | 1338 | 1653  |
| MSTRG.12521.1 | noncoding | -0.06144   | 192  | 303  | 554   |
| MSTRG.12525.2 | coding    | 0.093      | 909  | 2427 | 3830  |
| MSTRG.12525.1 | coding    | 0.093      | 1230 | 2748 | 4149  |
| MSTRG.12525.3 | coding    | 0.093      | 1578 | 3096 | 4494  |
| MSTRG.12528.3 | noncoding | -0.04096   | 1041 | 1149 | 1393  |
| MSTRG.12537.2 | coding    | 0.315      | 0    | 1188 | 3109  |
| MSTRG.12553.1 | coding    | 0.088      | 1695 | 2025 | 2358  |
| MSTRG.12558.1 | noncoding | -0.059392  | 21   | 36   | 1334  |
| MSTRG.12558.2 | noncoding | -0.0413696 | 87   | 96   | 600   |
| MSTRG.12558.3 | noncoding | -0.0290816 | 1443 | 1815 | 2613  |
| MSTRG.12560.1 | noncoding | -0.0303104 | 4341 | 4626 | 18790 |
| MSTRG.12550.2 | coding    | 0.069      | 489  | 1770 | 2197  |
| MSTRG.12550.3 | coding    | 0.07       | 180  | 1458 | 1947  |
| MSTRG.12569.1 | noncoding | -0.036864  | 243  | 276  | 472   |
| MSTRG.12572.1 | noncoding | -0.135168  | 153  | 183  | 339   |
| MSTRG.12573.1 | noncoding | -0.0004096 | 0    | 0    | 247   |
| MSTRG.12576.3 | noncoding | -0.057344  | 306  | 369  | 628   |
| MSTRG.12576.4 | noncoding | -0.057344  | 327  | 390  | 648   |
| MSTRG.12577.7 | coding    | 0.159      | 0    | 306  | 1497  |
| MSTRG.12577.5 | coding    | 0.159      | 0    | 306  | 1641  |
| MSTRG.12577.4 | noncoding | -0.0741376 | 318  | 414  | 1492  |
| MSTRG.12578.4 | coding    | 0.301      | 4077 | 4770 | 5308  |
| MSTRG.12588.1 | coding    | 0.069      | 5913 | 9543 | 10685 |
| MSTRG.12588.2 | coding    | 0.069      | 6042 | 9672 | 10813 |
| MSTRG.12588.3 | coding    | 0.069      | 5913 | 9543 | 10652 |
| MSTRG.12588.5 | coding    | 0.069      | 5607 | 9237 | 10379 |
| MSTRG.12589.1 | noncoding | -0.069632  | 498  | 573  | 854   |
| MSTRG.12589.2 | noncoding | -0.024576  | 2325 | 2409 | 2802  |
| MSTRG.12589.3 | noncoding | -0.0004096 | 0    | 48   | 1502  |
| MSTRG.12589.4 | noncoding | -0.028672  | 483  | 603  | 820   |
| MSTRG.12591.1 | noncoding | -0.1081344 | 3012 | 3258 | 3693  |
| MSTRG.12595.2 | coding    | 0.108      | 0    | 465  | 620   |
| MSTRG.12596.3 | noncoding | -0.0950272 | 1551 | 1878 | 2452  |
| MSTRG.12596.4 | noncoding | -0.034816  | 8748 | 8949 | 9526  |
| MSTRG.12596.5 | noncoding | -0.02048   | 135  | 288  | 3536  |
| MSTRG.12599.1 | noncoding | -0.0512    | 1122 | 1305 | 4843  |
| MSTRG.12598.4 | coding    | 0.241      | 4926 | 5721 | 9348  |
| MSTRG.12600.1 | noncoding | -0.0004096 | 1467 | 1686 | 4065  |
| MSTRG.12598.5 | coding    | 0.241      | 4200 | 4995 | 6129  |
| MSTRG.12598.6 | noncoding | -0.086016  | 132  | 165  | 1516  |
| MSTRG.12598.8 | coding    | 0.241      | 1410 | 2205 | 6392  |
| MSTRG.12598.9 | coding    | 0.241      | 915  | 1710 | 5338  |
| MSTRG.12601.1 | noncoding | -0.032768  | 492  | 537  | 894   |
| MSTRG.12602.1 | noncoding | -0.04096   | 1035 | 1284 | 1752  |
| MSTRG.12602.3 | noncoding | -0.0012288 | 60   | 207  | 896   |
| MSTRG.12602.2 | noncoding | -0.008192  | 60   | 189  | 494   |
| MSTRG.12602.4 | noncoding | -0.0212992 | 48   | 264  | 761   |
| MSTRG.12603.1 | coding    | 0.241      | 366  | 798  | 1508  |

|               |           |            |      |      |      |
|---------------|-----------|------------|------|------|------|
| MSTRG.12603.2 | coding    | 0.253      | 0    | 648  | 1389 |
| MSTRG.12603.3 | noncoding | -0.0987136 | 618  | 1050 | 1896 |
| MSTRG.12603.4 | coding    | 0.242      | 252  | 693  | 1277 |
| MSTRG.12607.2 | coding    | 0.171      | 1641 | 2376 | 3699 |
| MSTRG.12607.3 | coding    | 0.171      | 558  | 1293 | 2563 |
| MSTRG.12611.5 | coding    | 0.094      | 789  | 5943 | 6578 |
| MSTRG.12611.3 | coding    | 0.089      | 351  | 5793 | 6449 |
| MSTRG.12611.7 | coding    | 0.085      | 183  | 5928 | 6585 |
| MSTRG.12612.1 | noncoding | -0.036864  | 42   | 144  | 1533 |
| MSTRG.12612.2 | noncoding | -0.053248  | 459  | 537  | 2525 |
| MSTRG.12617.2 | coding    | 0.284      | 0    | 1407 | 1565 |
| MSTRG.12617.3 | coding    | 0.279      | 0    | 699  | 1569 |
| MSTRG.12619.1 | noncoding | -0.1605632 | 0    | 276  | 1964 |
| MSTRG.12618.2 | noncoding | -0.12288   | 0    | 72   | 1129 |
| MSTRG.12618.3 | noncoding | -0.0581632 | 1398 | 1578 | 7364 |
| MSTRG.12619.2 | noncoding | -0.16384   | 0    | 267  | 1867 |
| MSTRG.12619.3 | noncoding | -0.16384   | 0    | 267  | 1903 |
| MSTRG.12642.1 | noncoding | -0.004096  | 1224 | 1446 | 3471 |
| MSTRG.12643.1 | noncoding | -0.024576  | 321  | 420  | 4675 |
| MSTRG.12646.3 | noncoding | -0.012288  | 777  | 864  | 1136 |
| MSTRG.12647.1 | noncoding | -0.0098304 | 3102 | 3252 | 3628 |
| MSTRG.12642.2 | noncoding | -0.06144   | 117  | 180  | 3100 |
| MSTRG.12648.1 | noncoding | -0.0004096 | 0    | 0    | 1757 |
| MSTRG.12646.5 | coding    | 0.076      | 0    | 1398 | 1790 |
| MSTRG.12646.4 | coding    | 0.076      | 0    | 1398 | 2204 |
| MSTRG.12646.6 | noncoding | -0.036864  | 636  | 720  | 1279 |
| MSTRG.12652.3 | coding    | 0.162      | 1095 | 2328 | 2483 |
| MSTRG.12652.4 | noncoding | -0.0417792 | 102  | 177  | 1353 |
| MSTRG.12623.3 | coding    | 0.415      | 1347 | 2661 | 7618 |
| MSTRG.12623.4 | coding    | 0.422      | 1077 | 2379 | 7329 |
| MSTRG.12623.6 | coding    | 0.413      | 7599 | 8982 | 9662 |
| MSTRG.12623.5 | coding    | 0.429      | 0    | 1416 | 2096 |
| MSTRG.12625.2 | coding    | 0.033      | 885  | 1422 | 1585 |
| MSTRG.12625.3 | noncoding | -0.012288  | 1002 | 1143 | 1296 |
| MSTRG.12627.1 | coding    | 0.232      | 144  | 1101 | 1469 |
| MSTRG.12627.2 | coding    | 0.241      | 195  | 1047 | 2362 |
| MSTRG.12633.2 | coding    | 0.394      | 0    | 438  | 3025 |
| MSTRG.12635.1 | coding    | 0.075      | 69   | 2376 | 4392 |
| MSTRG.12655.1 | coding    | 0.275      | 0    | 270  | 468  |
| MSTRG.12660.1 | coding    | 0.052      | 462  | 1158 | 1529 |
| MSTRG.12661.2 | coding    | 0.11       | 162  | 876  | 1142 |
| MSTRG.12664.1 | coding    | 0.208      | 591  | 954  | 2568 |
| MSTRG.12674.3 | coding    | 0.196      | 351  | 780  | 950  |
| MSTRG.12676.1 | coding    | 0.157      | 417  | 6609 | 8622 |
| MSTRG.12677.2 | coding    | 0.081      | 747  | 1305 | 2056 |
| MSTRG.12680.1 | noncoding | -0.0208896 | 3    | 165  | 318  |
| MSTRG.12681.2 | coding    | 0.266      | 0    | 2370 | 2630 |
| MSTRG.12682.1 | coding    | 0.079      | 873  | 1635 | 1788 |
| MSTRG.12685.1 | noncoding | -0.0401408 | 4107 | 4434 | 6955 |
| MSTRG.12685.2 | noncoding | -0.069632  | 0    | 441  | 5199 |
| MSTRG.12686.1 | noncoding | -0.0004096 | 0    | 0    | 362  |
| MSTRG.12683.2 | coding    | 0.064      | 0    | 1401 | 2892 |
| MSTRG.12709.4 | coding    | 0.072      | 2067 | 2379 | 2543 |
| MSTRG.12711.1 | noncoding | -0.0086016 | 1053 | 1350 | 5705 |

|                 |           |             |       |       |       |
|-----------------|-----------|-------------|-------|-------|-------|
| MSTRG. 12711. 2 | noncoding | -0. 0704512 | 13215 | 13437 | 23852 |
| MSTRG. 12711. 3 | coding    | 0. 129      | 7428  | 7731  | 23540 |
| MSTRG. 12709. 6 | noncoding | -0. 008192  | 4017  | 4083  | 6235  |
| MSTRG. 12713. 1 | noncoding | -0. 0036864 | 6861  | 6948  | 7513  |
| MSTRG. 12715. 1 | coding    | 0. 118      | 600   | 891   | 11289 |
| MSTRG. 12701. 1 | noncoding | -0. 0004096 | 0     | 0     | 224   |
| MSTRG. 12716. 1 | coding    | 0. 182      | 81    | 2703  | 4592  |
| MSTRG. 12716. 2 | coding    | 0. 174      | 81    | 1791  | 4483  |
| MSTRG. 12716. 3 | coding    | 0. 205      | 2790  | 4485  | 4862  |
| MSTRG. 12717. 1 | noncoding | -0. 0274432 | 474   | 564   | 2546  |
| MSTRG. 12716. 4 | coding    | 0. 075      | 6492  | 6747  | 9199  |
| MSTRG. 12718. 1 | noncoding | -0. 032768  | 1884  | 2001  | 3824  |
| MSTRG. 12716. 5 | noncoding | -0. 12288   | 0     | 42    | 1502  |
| MSTRG. 12705. 2 | noncoding | -0. 1650688 | 0     | 60    | 265   |
| MSTRG. 12705. 4 | noncoding | -0. 0372736 | 264   | 369   | 1367  |
| MSTRG. 12705. 3 | coding    | 0. 066      | 264   | 7122  | 7677  |
| MSTRG. 12705. 5 | coding    | 0. 087      | 186   | 3204  | 3704  |
| MSTRG. 12730. 2 | noncoding | -0. 0688128 | 1656  | 1857  | 2060  |
| MSTRG. 12731. 3 | noncoding | -0. 0118784 | 2772  | 2937  | 3091  |
| MSTRG. 12731. 2 | coding    | 0. 155      | 1194  | 2289  | 5635  |
| MSTRG. 12731. 4 | noncoding | -0. 032768  | 2079  | 2184  | 3291  |
| MSTRG. 12731. 6 | coding    | 0. 129      | 471   | 1233  | 6719  |
| MSTRG. 12731. 7 | coding    | 0. 176      | 738   | 1176  | 6661  |
| MSTRG. 12731. 8 | coding    | 0. 129      | 471   | 1233  | 5640  |
| MSTRG. 12720. 2 | noncoding | -0. 0487424 | 612   | 978   | 1277  |
| MSTRG. 12721. 3 | coding    | 0. 067      | 309   | 1257  | 1897  |
| MSTRG. 12722. 1 | noncoding | -0. 0004096 | 0     | 0     | 330   |
| MSTRG. 12725. 1 | noncoding | -0. 0004096 | 0     | 0     | 420   |
| MSTRG. 12725. 2 | noncoding | -0. 0004096 | 0     | 0     | 425   |
| MSTRG. 12738. 3 | coding    | 0. 083      | 210   | 861   | 1017  |
| MSTRG. 12746. 1 | coding    | 0. 049      | 48    | 705   | 1569  |
| MSTRG. 12759. 1 | noncoding | -0. 026624  | 6     | 27    | 331   |
| MSTRG. 12768. 1 | noncoding | -0. 036864  | 618   | 624   | 786   |
| MSTRG. 12769. 1 | noncoding | -0. 028672  | 24    | 126   | 1218  |
| MSTRG. 12791. 1 | coding    | 0. 044      | 1584  | 5889  | 7581  |
| MSTRG. 12791. 2 | coding    | 0. 044      | 1605  | 5910  | 6889  |
| MSTRG. 12792. 1 | coding    | 0. 232      | 120   | 16674 | 18091 |
| MSTRG. 12792. 2 | coding    | 0. 232      | 300   | 16854 | 18269 |
| MSTRG. 12792. 3 | coding    | 0. 232      | 546   | 17100 | 18130 |
| MSTRG. 12792. 6 | noncoding | -0. 0008192 | 726   | 855   | 1882  |
| MSTRG. 12793. 2 | noncoding | -0. 008192  | 18    | 156   | 1978  |
| MSTRG. 12794. 1 | noncoding | -0. 0229376 | 486   | 864   | 1021  |
| MSTRG. 12794. 2 | coding    | 0. 206      | 0     | 120   | 648   |
| MSTRG. 12777. 1 | coding    | 0. 247      | 138   | 1467  | 4425  |
| MSTRG. 12778. 1 | noncoding | -0. 0909312 | 0     | 231   | 1858  |
| MSTRG. 12784. 1 | noncoding | -0. 376832  | 177   | 186   | 596   |
| MSTRG. 12785. 2 | coding    | 0. 192      | 5523  | 5730  | 5971  |
| MSTRG. 12785. 3 | coding    | 0. 192      | 6804  | 7011  | 7237  |
| MSTRG. 12785. 4 | coding    | 0. 192      | 5127  | 5334  | 5574  |
| MSTRG. 12789. 3 | coding    | 0. 047      | 339   | 1722  | 4282  |
| MSTRG. 12800. 1 | coding    | 0. 35       | 0     | 327   | 1198  |
| MSTRG. 12800. 2 | coding    | 0. 351      | 0     | 300   | 1046  |
| MSTRG. 12800. 3 | coding    | 0. 351      | 0     | 300   | 1050  |
| MSTRG. 12804. 2 | noncoding | -0. 1007616 | 1461  | 2115  | 2271  |

|                  |           |             |      |      |       |
|------------------|-----------|-------------|------|------|-------|
| MSTRG. 12805. 3  | coding    | 0. 202      | 1014 | 1644 | 1798  |
| MSTRG. 12806. 2  | coding    | 0. 132      | 297  | 1578 | 2497  |
| MSTRG. 12806. 1  | coding    | 0. 151      | 0    | 1413 | 2882  |
| MSTRG. 12806. 4  | coding    | 0. 124      | 69   | 1665 | 2584  |
| MSTRG. 12806. 5  | coding    | 0. 133      | 417  | 1803 | 3273  |
| MSTRG. 12808. 2  | coding    | 0. 024      | 168  | 1050 | 1597  |
| MSTRG. 12810. 1  | noncoding | -0. 032768  | 3960 | 4080 | 12164 |
| MSTRG. 12813. 1  | coding    | 0. 062      | 807  | 1203 | 2631  |
| MSTRG. 12816. 1  | noncoding | -0. 0004096 | 327  | 471  | 1115  |
| MSTRG. 12829. 1  | coding    | 0. 141      | 0    | 1698 | 7464  |
| MSTRG. 12829. 6  | coding    | 0. 114      | 237  | 1845 | 3597  |
| MSTRG. 12829. 4  | coding    | 0. 125      | 0    | 1767 | 2295  |
| MSTRG. 12829. 7  | coding    | 0. 097      | 12   | 1386 | 3136  |
| MSTRG. 12830. 4  | coding    | 0. 019      | 150  | 2547 | 2860  |
| MSTRG. 12831. 1  | noncoding | -0. 0057344 | 3747 | 3927 | 4084  |
| MSTRG. 12835. 1  | noncoding | -0. 0004096 | 0    | 0    | 293   |
| MSTRG. 12826. 1  | noncoding | -0. 014336  | 942  | 1455 | 1610  |
| MSTRG. 12826. 2  | noncoding | -0. 0405504 | 1266 | 1605 | 1844  |
| MSTRG. 12827. 1  | coding    | 0. 149      | 0    | 129  | 329   |
| MSTRG. 12839. 2  | coding    | 0. 23       | 84   | 909  | 2292  |
| MSTRG. 12847. 3  | coding    | 0. 121      | 45   | 2139 | 2294  |
| MSTRG. 12847. 4  | coding    | 0. 12       | 45   | 2133 | 2288  |
| MSTRG. 12848. 1  | noncoding | -0. 086016  | 966  | 1017 | 1419  |
| MSTRG. 12851. 2  | coding    | 0. 116      | 66   | 1359 | 2970  |
| MSTRG. 12851. 3  | coding    | 0. 113      | 174  | 963  | 2431  |
| MSTRG. 12863. 6  | coding    | 0. 264      | 1998 | 4716 | 6078  |
| MSTRG. 12863. 7  | coding    | 0. 268      | 2154 | 4875 | 6238  |
| MSTRG. 12863. 14 | coding    | 0. 263      | 1941 | 4806 | 5872  |
| MSTRG. 12863. 16 | coding    | 0. 264      | 2073 | 4941 | 6008  |
| MSTRG. 12863. 11 | coding    | 0. 266      | 789  | 3525 | 4590  |
| MSTRG. 12863. 13 | coding    | 0. 265      | 1071 | 3804 | 4870  |
| MSTRG. 12863. 15 | coding    | 0. 227      | 1104 | 3147 | 4213  |
| MSTRG. 12863. 12 | coding    | 0. 264      | 72   | 2979 | 4045  |
| MSTRG. 12863. 18 | coding    | 0. 264      | 90   | 3126 | 3411  |
| MSTRG. 12863. 17 | coding    | 0. 226      | 1182 | 3222 | 3509  |
| MSTRG. 12863. 19 | noncoding | -0. 036864  | 5916 | 6042 | 7169  |
| MSTRG. 12864. 1  | noncoding | -0. 008192  | 4149 | 4284 | 6043  |
| MSTRG. 12863. 20 | noncoding | -0. 118784  | 162  | 165  | 465   |
| MSTRG. 12888. 1  | noncoding | -0. 024576  | 222  | 345  | 3284  |
| MSTRG. 12890. 2  | noncoding | -0. 043008  | 2610 | 2805 | 2959  |
| MSTRG. 12890. 4  | noncoding | -0. 135168  | 237  | 291  | 2282  |
| MSTRG. 12907. 3  | coding    | 0. 081      | 33   | 1236 | 2814  |
| MSTRG. 12907. 2  | coding    | 0. 073      | 81   | 495  | 6797  |
| MSTRG. 12907. 4  | coding    | 0. 078      | 1026 | 1704 | 2580  |
| MSTRG. 12907. 5  | noncoding | -0. 0278528 | 2331 | 2454 | 3373  |
| MSTRG. 12907. 6  | coding    | 0. 089      | 33   | 474  | 5679  |
| MSTRG. 12912. 3  | coding    | 0. 093      | 831  | 3930 | 4084  |
| MSTRG. 12912. 4  | coding    | 0. 176      | 243  | 1503 | 3583  |
| MSTRG. 12914. 1  | noncoding | -0. 0495616 | 0    | 189  | 900   |
| MSTRG. 12933. 4  | coding    | 0. 299      | 1335 | 2016 | 3603  |
| MSTRG. 12933. 6  | coding    | 0. 291      | 2064 | 3171 | 4757  |
| MSTRG. 12933. 5  | coding    | 0. 219      | 570  | 2022 | 3609  |
| MSTRG. 12933. 3  | coding    | 0. 215      | 4341 | 5973 | 7558  |
| MSTRG. 12933. 7  | coding    | 0. 215      | 4464 | 6099 | 7684  |

|                  |           |             |       |       |       |
|------------------|-----------|-------------|-------|-------|-------|
| MSTRG. 12933. 8  | coding    | 0. 263      | 249   | 2295  | 3880  |
| MSTRG. 12934. 1  | noncoding | -0. 032768  | 507   | 573   | 2128  |
| MSTRG. 12919. 1  | noncoding | -0. 008192  | 342   | 420   | 1708  |
| MSTRG. 12920. 1  | coding    | 0. 091      | 132   | 1581  | 1791  |
| MSTRG. 12920. 2  | coding    | 0. 093      | 444   | 1932  | 2140  |
| MSTRG. 12925. 1  | noncoding | -0. 073728  | 111   | 183   | 348   |
| MSTRG. 12925. 2  | noncoding | -0. 1093632 | 0     | 12    | 284   |
| MSTRG. 12926. 1  | noncoding | -0. 0004096 | 0     | 0     | 302   |
| MSTRG. 12938. 1  | noncoding | -0. 0618496 | 48    | 330   | 1043  |
| MSTRG. 12947. 3  | coding    | 0. 233      | 231   | 4800  | 6974  |
| MSTRG. 12947. 2  | coding    | 0. 235      | 519   | 4956  | 7130  |
| MSTRG. 12971. 1  | coding    | 0. 063      | 8187  | 9999  | 12458 |
| MSTRG. 12978. 1  | coding    | 0. 054      | 69    | 231   | 746   |
| MSTRG. 12978. 2  | noncoding | -0. 028672  | 246   | 354   | 18716 |
| MSTRG. 12978. 3  | noncoding | -0. 024576  | 7824  | 7923  | 12222 |
| MSTRG. 12983. 5  | coding    | 0. 082      | 0     | 2247  | 2596  |
| MSTRG. 12984. 1  | noncoding | -0. 3117056 | 165   | 177   | 378   |
| MSTRG. 12939. 1  | coding    | 0. 491      | 0     | 1728  | 5109  |
| MSTRG. 12939. 2  | coding    | 0. 326      | 105   | 2160  | 3184  |
| MSTRG. 12939. 3  | coding    | 0. 461      | 1059  | 2394  | 3418  |
| MSTRG. 12940. 1  | noncoding | -0. 131072  | 930   | 990   | 2957  |
| MSTRG. 12939. 4  | coding    | 0. 466      | 450   | 1797  | 3151  |
| MSTRG. 12939. 5  | coding    | 0. 465      | 3540  | 4812  | 5835  |
| MSTRG. 12988. 1  | coding    | 0. 128      | 4713  | 5079  | 5831  |
| MSTRG. 13003. 1  | noncoding | -0. 08192   | 963   | 1020  | 2893  |
| MSTRG. 13008. 1  | noncoding | -0. 0004096 | 663   | 804   | 2202  |
| MSTRG. 13008. 2  | noncoding | -0. 02048   | 1482  | 1617  | 1978  |
| MSTRG. 13009. 1  | noncoding | -0. 0004096 | 558   | 603   | 1894  |
| MSTRG. 13010. 1  | noncoding | -0. 147456  | 30    | 72    | 228   |
| MSTRG. 13012. 1  | noncoding | -0. 0057344 | 0     | 93    | 1092  |
| MSTRG. 13013. 1  | coding    | 0. 013      | 2058  | 2148  | 3299  |
| MSTRG. 13013. 2  | noncoding | -0. 0782336 | 12942 | 13290 | 13443 |
| MSTRG. 13013. 6  | coding    | 0. 362      | 0     | 90    | 853   |
| MSTRG. 13013. 4  | coding    | 0. 46       | 0     | 105   | 8489  |
| MSTRG. 13013. 5  | coding    | 0. 252      | 0     | 288   | 7190  |
| MSTRG. 13014. 1  | noncoding | -0. 0167936 | 828   | 978   | 1225  |
| MSTRG. 13022. 1  | noncoding | -0. 0663552 | 4689  | 4902  | 27763 |
| MSTRG. 13022. 2  | noncoding | -0. 0028672 | 1428  | 1557  | 4485  |
| MSTRG. 13025. 2  | noncoding | -0. 004096  | 5121  | 5256  | 24787 |
| MSTRG. 13025. 4  | coding    | 0. 278      | 53049 | 54117 | 60730 |
| MSTRG. 13025. 5  | noncoding | -0. 06144   | 8259  | 8358  | 12443 |
| MSTRG. 13025. 7  | noncoding | -0. 038912  | 5970  | 6234  | 12028 |
| MSTRG. 13025. 8  | noncoding | -0. 038912  | 6693  | 6957  | 12361 |
| MSTRG. 13025. 9  | coding    | 0. 205      | 11175 | 12909 | 19710 |
| MSTRG. 13025. 10 | noncoding | -0. 006144  | 837   | 1137  | 6661  |
| MSTRG. 13025. 11 | coding    | 0. 278      | 10278 | 11346 | 18149 |
| MSTRG. 13025. 12 | noncoding | -0. 0786432 | 4887  | 5265  | 7247  |
| MSTRG. 13030. 3  | coding    | 0. 193      | 435   | 3465  | 3967  |
| MSTRG. 13030. 1  | coding    | 0. 2        | 435   | 10677 | 12150 |
| MSTRG. 13034. 1  | noncoding | -0. 0004096 | 0     | 0     | 287   |
| MSTRG. 13034. 2  | noncoding | -0. 0004096 | 132   | 132   | 417   |
| MSTRG. 13034. 3  | coding    | 0. 031      | 72    | 156   | 412   |
| MSTRG. 13040. 4  | coding    | 0. 106      | 633   | 5634  | 7808  |
| MSTRG. 13040. 6  | coding    | 0. 108      | 369   | 5433  | 5955  |

|               |           |            |      |       |       |
|---------------|-----------|------------|------|-------|-------|
| MSTRG.13039.1 | noncoding | -0.036864  | 72   | 81    | 238   |
| MSTRG.13048.1 | coding    | 0.074      | 0    | 3495  | 9162  |
| MSTRG.13049.1 | noncoding | -0.036864  | 168  | 195   | 892   |
| MSTRG.13055.1 | noncoding | -0.0036864 | 1062 | 1125  | 1968  |
| MSTRG.13053.1 | noncoding | -0.0004096 | 0    | 0     | 565   |
| MSTRG.13056.2 | coding    | 0.306      | 0    | 1152  | 3764  |
| MSTRG.13061.1 | coding    | 0.057      | 1410 | 2436  | 3057  |
| MSTRG.13061.3 | coding    | 0.057      | 8760 | 9786  | 10573 |
| MSTRG.13062.1 | noncoding | -0.0094208 | 321  | 456   | 2397  |
| MSTRG.13061.5 | noncoding | -0.0458752 | 0    | 102   | 3296  |
| MSTRG.13060.1 | noncoding | -0.0540672 | 0    | 114   | 2265  |
| MSTRG.13063.1 | coding    | 0.563      | 0    | 84    | 1895  |
| MSTRG.13065.2 | coding    | 0.093      | 177  | 519   | 1165  |
| MSTRG.13066.3 | coding    | 0.064      | 90   | 987   | 1696  |
| MSTRG.13068.1 | noncoding | -0.0004096 | 0    | 0     | 253   |
| MSTRG.13077.4 | coding    | 0.21       | 0    | 690   | 1830  |
| MSTRG.13078.1 | noncoding | -0.016384  | 558  | 678   | 1142  |
| MSTRG.13079.2 | coding    | 0.483      | 0    | 933   | 1146  |
| MSTRG.13082.3 | noncoding | -0.0405504 | 426  | 534   | 688   |
| MSTRG.13082.4 | noncoding | -0.0253952 | 36   | 240   | 1076  |
| MSTRG.13082.2 | coding    | 0.09       | 165  | 810   | 1313  |
| MSTRG.13087.1 | coding    | 0.359      | 372  | 5610  | 8486  |
| MSTRG.13087.2 | coding    | 0.35       | 111  | 5505  | 8382  |
| MSTRG.13087.4 | coding    | 0.352      | 2823 | 7800  | 10676 |
| MSTRG.13087.6 | coding    | 0.351      | 591  | 5484  | 8355  |
| MSTRG.13091.2 | noncoding | -0.0995328 | 3    | 1062  | 9218  |
| MSTRG.13096.2 | noncoding | -0.004096  | 633  | 765   | 4805  |
| MSTRG.13106.2 | coding    | 0.258      | 0    | 26739 | 27569 |
| MSTRG.13106.1 | coding    | 0.258      | 75   | 26925 | 27755 |
| MSTRG.13106.3 | coding    | 0.259      | 75   | 26649 | 27747 |
| MSTRG.13107.1 | noncoding | -0.0524288 | 546  | 846   | 1003  |
| MSTRG.13100.4 | coding    | 0.12       | 234  | 630   | 1024  |
| MSTRG.13110.4 | coding    | 0.075      | 0    | 4218  | 7654  |
| MSTRG.13110.3 | coding    | 0.074      | 0    | 4224  | 5840  |
| MSTRG.13110.5 | coding    | 0.074      | 0    | 4224  | 4920  |
| MSTRG.13110.6 | coding    | 0.064      | 330  | 2430  | 3600  |
| MSTRG.13110.7 | coding    | 0.037      | 96   | 3678  | 4504  |
| MSTRG.13111.1 | noncoding | -0.012288  | 966  | 1059  | 1287  |
| MSTRG.13112.1 | noncoding | -0.028672  | 270  | 351   | 2596  |
| MSTRG.13115.1 | coding    | 0.324      | 705  | 5715  | 7305  |
| MSTRG.13117.1 | noncoding | -0.006144  | 54   | 126   | 442   |
| MSTRG.13115.2 | coding    | 0.324      | 186  | 5196  | 6807  |
| MSTRG.13118.2 | noncoding | -0.0913408 | 1014 | 1452  | 1768  |
| MSTRG.13119.1 | noncoding | -0.008192  | 8403 | 8490  | 9309  |
| MSTRG.13120.1 | noncoding | -0.0004096 | 0    | 0     | 938   |
| MSTRG.13118.4 | coding    | 0.117      | 0    | 312   | 2585  |
| MSTRG.13118.5 | noncoding | -0.0315392 | 0    | 204   | 1808  |
| MSTRG.13143.4 | coding    | 0.269      | 0    | 6648  | 8153  |
| MSTRG.13143.6 | coding    | 0.233      | 0    | 2226  | 4991  |
| MSTRG.13143.5 | coding    | 0.278      | 0    | 5427  | 5581  |
| MSTRG.13143.7 | coding    | 0.284      | 0    | 5367  | 6870  |
| MSTRG.13144.1 | noncoding | -0.0131072 | 363  | 522   | 12965 |
| MSTRG.13143.8 | coding    | 0.268      | 2058 | 7455  | 7608  |
| MSTRG.13143.9 | coding    | 0.272      | 543  | 5793  | 5947  |



|                  |           |             |       |       |       |
|------------------|-----------|-------------|-------|-------|-------|
| MSTRG. 13145. 1  | noncoding | -0. 0262144 | 0     | 66    | 972   |
| MSTRG. 13146. 1  | noncoding | -0. 0745472 | 0     | 93    | 4938  |
| MSTRG. 13143. 10 | noncoding | -0. 022528  | 291   | 333   | 840   |
| MSTRG. 13148. 1  | noncoding | -0. 0159744 | 2160  | 2307  | 4702  |
| MSTRG. 13149. 1  | noncoding | -0. 0167936 | 3255  | 3321  | 7817  |
| MSTRG. 13150. 1  | noncoding | -0. 0139264 | 375   | 477   | 3081  |
| MSTRG. 13151. 1  | noncoding | -0. 036864  | 2637  | 2700  | 5709  |
| MSTRG. 13152. 1  | noncoding | -0. 0466944 | 678   | 876   | 4471  |
| MSTRG. 13152. 2  | noncoding | -0. 0466944 | 2040  | 2238  | 5686  |
| MSTRG. 13143. 11 | noncoding | -0. 0331776 | 2826  | 2997  | 4039  |
| MSTRG. 13143. 12 | coding    | 0. 307      | 1056  | 3603  | 3756  |
| MSTRG. 13130. 1  | noncoding | -0. 0139264 | 87    | 240   | 416   |
| MSTRG. 13134. 1  | noncoding | -0. 0004096 | 1551  | 1764  | 2196  |
| MSTRG. 13137. 1  | noncoding | -0. 0466944 | 0     | 1218  | 2571  |
| MSTRG. 13138. 3  | coding    | 0. 349      | 0     | 741   | 2768  |
| MSTRG. 13138. 5  | coding    | 0. 39       | 0     | 465   | 2030  |
| MSTRG. 13138. 6  | coding    | 0. 385      | 0     | 375   | 1079  |
| MSTRG. 13139. 1  | noncoding | -0. 0241664 | 3543  | 4026  | 9449  |
| MSTRG. 13139. 2  | noncoding | -0. 0397312 | 1500  | 1713  | 5368  |
| MSTRG. 13139. 3  | noncoding | -0. 0290816 | 9324  | 9516  | 13889 |
| MSTRG. 13139. 4  | noncoding | -0. 0221184 | 399   | 549   | 7270  |
| MSTRG. 13139. 5  | coding    | 0. 122      | 5382  | 5673  | 22132 |
| MSTRG. 13128. 2  | coding    | 0. 311      | 528   | 1353  | 3036  |
| MSTRG. 13128. 3  | coding    | 0. 291      | 183   | 1113  | 2743  |
| MSTRG. 13128. 4  | coding    | 0. 299      | 393   | 1200  | 2829  |
| MSTRG. 13154. 1  | noncoding | -0. 0241664 | 465   | 588   | 844   |
| MSTRG. 13154. 2  | noncoding | -0. 04096   | 0     | 21    | 388   |
| MSTRG. 13154. 3  | noncoding | -0. 014336  | 135   | 513   | 1007  |
| MSTRG. 13154. 4  | noncoding | -0. 0196608 | 60    | 528   | 1029  |
| MSTRG. 13155. 2  | coding    | 0. 141      | 426   | 2040  | 2395  |
| MSTRG. 13162. 1  | noncoding | -0. 0331776 | 1638  | 1875  | 3269  |
| MSTRG. 13163. 1  | noncoding | -0. 03072   | 813   | 1104  | 9280  |
| MSTRG. 13164. 1  | coding    | 0. 093      | 20598 | 20847 | 23923 |
| MSTRG. 13161. 6  | coding    | 0. 48       | 1257  | 4326  | 6216  |
| MSTRG. 13161. 4  | coding    | 0. 397      | 0     | 3969  | 6057  |
| MSTRG. 13161. 7  | coding    | 0. 504      | 0     | 2622  | 6196  |
| MSTRG. 13161. 5  | coding    | 0. 505      | 0     | 4203  | 13916 |
| MSTRG. 13165. 1  | noncoding | -0. 0344064 | 129   | 285   | 439   |
| MSTRG. 13159. 2  | coding    | 0. 313      | 0     | 1665  | 4674  |
| MSTRG. 13159. 3  | coding    | 0. 278      | 99    | 1623  | 4633  |
| MSTRG. 13159. 4  | coding    | 0. 284      | 513   | 2049  | 3551  |
| MSTRG. 13166. 1  | coding    | 0. 232      | 534   | 2352  | 2756  |
| MSTRG. 13170. 3  | noncoding | -0. 075776  | 81    | 402   | 607   |
| MSTRG. 13171. 1  | coding    | 0. 302      | 54    | 669   | 3596  |
| MSTRG. 13177. 1  | coding    | 0. 147      | 1092  | 1716  | 2146  |
| MSTRG. 13177. 4  | noncoding | -0. 0602112 | 1038  | 1662  | 3666  |
| MSTRG. 13177. 5  | noncoding | -0. 0524288 | 132   | 1041  | 1471  |
| MSTRG. 13174. 1  | coding    | 0. 437      | 0     | 7527  | 8993  |
| MSTRG. 13181. 3  | coding    | 0. 294      | 0     | 3957  | 5365  |
| MSTRG. 13181. 4  | coding    | 0. 297      | 0     | 4992  | 5282  |
| MSTRG. 13181. 5  | coding    | 0. 289      | 0     | 3864  | 5112  |
| MSTRG. 13179. 1  | noncoding | -0. 0425984 | 0     | 318   | 768   |
| MSTRG. 13179. 3  | noncoding | -0. 0815104 | 96    | 441   | 595   |
| MSTRG. 13179. 2  | noncoding | -0. 0663552 | 456   | 777   | 932   |

|                |           |            |      |      |       |
|----------------|-----------|------------|------|------|-------|
| MSTRG.13180.1  | noncoding | -0.0557056 | 1626 | 2106 | 2305  |
| MSTRG.13184.1  | coding    | 0.23       | 153  | 1518 | 3860  |
| MSTRG.13184.2  | coding    | 0.23       | 435  | 1800 | 1981  |
| MSTRG.13199.1  | coding    | 0.212      | 177  | 1146 | 1410  |
| MSTRG.13199.2  | coding    | 0.249      | 168  | 942  | 1124  |
| MSTRG.13201.1  | noncoding | -0.032768  | 27   | 66   | 894   |
| MSTRG.13183.1  | noncoding | -0.0200704 | 45   | 252  | 891   |
| MSTRG.13206.2  | noncoding | -0.0475136 | 0    | 372  | 526   |
| MSTRG.13208.1  | coding    | 0.249      | 0    | 888  | 13581 |
| MSTRG.13208.4  | coding    | 0.269      | 0    | 786  | 7705  |
| MSTRG.13209.1  | noncoding | -0.028672  | 3294 | 3423 | 12566 |
| MSTRG.13209.2  | coding    | 0.063      | 1998 | 2910 | 15529 |
| MSTRG.13203.1  | noncoding | -0.0851968 | 162  | 480  | 785   |
| MSTRG.13217.1  | noncoding | -0.0004096 | 0    | 0    | 202   |
| MSTRG.13221.2  | coding    | 0.253      | 0    | 870  | 1312  |
| MSTRG.13222.1  | coding    | 0.275      | 324  | 3498 | 4573  |
| MSTRG.13222.2  | coding    | 0.302      | 615  | 3504 | 9868  |
| MSTRG.13222.3  | coding    | 0.31       | 663  | 3450 | 7950  |
| MSTRG.13222.6  | coding    | 0.21       | 3090 | 3783 | 3946  |
| MSTRG.13223.1  | noncoding | -0.057344  | 1503 | 1626 | 3376  |
| MSTRG.13224.1  | noncoding | -0.0864256 | 1149 | 1377 | 2284  |
| MSTRG.13222.7  | noncoding | -0.014336  | 1962 | 2115 | 3417  |
| MSTRG.13233.1  | coding    | 0.531      | 0    | 2247 | 5182  |
| MSTRG.13237.1  | noncoding | -0.0364544 | 990  | 1083 | 1690  |
| MSTRG.13241.3  | coding    | 0.207      | 252  | 1074 | 1880  |
| MSTRG.13241.4  | coding    | 0.131      | 0    | 1605 | 2412  |
| MSTRG.13241.5  | coding    | 0.119      | 0    | 1599 | 2405  |
| MSTRG.13241.6  | coding    | 0.238      | 1365 | 1986 | 2794  |
| MSTRG.13243.1  | coding    | 0.24       | 6    | 1266 | 1565  |
| MSTRG.13243.2  | coding    | 0.317      | 0    | 444  | 741   |
| MSTRG.13243.3  | coding    | 0.316      | 0    | 435  | 734   |
| MSTRG.13244.3  | coding    | 0.39       | 0    | 1674 | 1981  |
| MSTRG.13261.4  | coding    | 0.508      | 0    | 5322 | 7130  |
| MSTRG.13261.5  | coding    | 0.507      | 0    | 5325 | 7133  |
| MSTRG.13261.6  | coding    | 0.508      | 0    | 5322 | 7130  |
| MSTRG.13261.7  | coding    | 0.507      | 0    | 5328 | 7136  |
| MSTRG.13261.1  | coding    | 0.507      | 0    | 5331 | 7531  |
| MSTRG.13261.8  | coding    | 0.489      | 423  | 5304 | 7112  |
| MSTRG.13261.9  | coding    | 0.493      | 165  | 4917 | 6726  |
| MSTRG.13261.10 | coding    | 0.495      | 1338 | 5889 | 7698  |
| MSTRG.13261.11 | coding    | 0.494      | 276  | 4827 | 6637  |
| MSTRG.13261.12 | coding    | 0.493      | 192  | 4749 | 6559  |
| MSTRG.13261.13 | coding    | 0.498      | 1023 | 5607 | 7415  |
| MSTRG.13261.14 | coding    | 0.495      | 1107 | 5679 | 7488  |
| MSTRG.13263.1  | noncoding | -0.0643072 | 972  | 1263 | 1416  |
| MSTRG.13266.1  | noncoding | -0.0823296 | 222  | 774  | 948   |
| MSTRG.13267.1  | noncoding | -0.045056  | 2823 | 4830 | 5126  |
| MSTRG.13267.2  | noncoding | -0.0987136 | 0    | 549  | 1251  |
| MSTRG.13267.3  | noncoding | -0.1191936 | 0    | 495  | 804   |
| MSTRG.13267.4  | noncoding | -0.172032  | 0    | 270  | 940   |
| MSTRG.13254.2  | noncoding | -0.0770048 | 579  | 759  | 916   |
| MSTRG.13254.1  | noncoding | -0.069632  | 132  | 183  | 466   |
| MSTRG.13253.3  | coding    | 0.351      | 0    | 897  | 2497  |
| MSTRG.13253.4  | coding    | 0.378      | 111  | 927  | 2687  |

|                  |           |             |       |       |       |
|------------------|-----------|-------------|-------|-------|-------|
| MSTRG. 13259. 2  | coding    | 0. 523      | 0     | 2769  | 3093  |
| MSTRG. 13260. 1  | noncoding | -0. 0671744 | 1821  | 2439  | 3742  |
| MSTRG. 13268. 1  | noncoding | -0. 0581632 | 267   | 639   | 2438  |
| MSTRG. 13268. 2  | coding    | 0. 236      | 165   | 2361  | 2695  |
| MSTRG. 13268. 3  | noncoding | -0. 0835584 | 429   | 1008  | 1339  |
| MSTRG. 13268. 4  | coding    | 0. 086      | 1209  | 1431  | 7702  |
| MSTRG. 13268. 5  | coding    | 0. 214      | 33    | 639   | 964   |
| MSTRG. 13269. 1  | noncoding | -0. 0401408 | 1425  | 1635  | 1957  |
| MSTRG. 13268. 8  | noncoding | -0. 0425984 | 1437  | 1701  | 3986  |
| MSTRG. 13270. 1  | noncoding | -0. 0258048 | 501   | 2124  | 2279  |
| MSTRG. 13273. 4  | coding    | 0. 2        | 345   | 1494  | 1855  |
| MSTRG. 13281. 1  | coding    | 0. 056      | 807   | 1695  | 2797  |
| MSTRG. 13281. 2  | noncoding | -0. 0200704 | 12    | 18    | 271   |
| MSTRG. 13282. 2  | noncoding | -0. 114688  | 0     | 18    | 231   |
| MSTRG. 13284. 8  | coding    | 0. 241      | 0     | 531   | 4839  |
| MSTRG. 13284. 6  | coding    | 0. 134      | 549   | 1842  | 2024  |
| MSTRG. 13284. 9  | noncoding | -0. 032768  | 1812  | 1962  | 4048  |
| MSTRG. 13284. 10 | coding    | 0. 189      | 897   | 1713  | 1895  |
| MSTRG. 13277. 1  | noncoding | -0. 0360448 | 87    | 336   | 901   |
| MSTRG. 13277. 2  | noncoding | -0. 0897024 | 0     | 243   | 996   |
| MSTRG. 13286. 3  | coding    | 0. 28       | 2583  | 3090  | 3792  |
| MSTRG. 13287. 1  | noncoding | -0. 0528384 | 609   | 708   | 1077  |
| MSTRG. 13303. 1  | coding    | 0. 032      | 48    | 180   | 554   |
| MSTRG. 13305. 1  | noncoding | -0. 151552  | 0     | 12    | 243   |
| MSTRG. 13314. 1  | coding    | 0. 128      | 0     | 1332  | 15639 |
| MSTRG. 13314. 3  | coding    | 0. 063      | 1008  | 1818  | 7923  |
| MSTRG. 13314. 2  | coding    | 0. 06       | 0     | 918   | 6102  |
| MSTRG. 13323. 1  | noncoding | -0. 0049152 | 1980  | 2115  | 2411  |
| MSTRG. 13323. 2  | noncoding | -0. 0278528 | 1650  | 1746  | 1901  |
| MSTRG. 13320. 3  | coding    | 0. 069      | 1392  | 3192  | 3889  |
| MSTRG. 13320. 4  | coding    | 0. 096      | 7932  | 8436  | 9217  |
| MSTRG. 13320. 5  | coding    | 0. 084      | 819   | 2733  | 3430  |
| MSTRG. 13320. 6  | noncoding | -0. 0241664 | 14514 | 14673 | 14926 |
| MSTRG. 13320. 7  | coding    | 0. 106      | 750   | 1176  | 1748  |
| MSTRG. 13320. 9  | noncoding | -0. 0094208 | 2331  | 2427  | 2673  |
| MSTRG. 13324. 1  | noncoding | -0. 0274432 | 4947  | 5154  | 14321 |
| MSTRG. 13325. 1  | noncoding | -0. 08192   | 1419  | 1491  | 2589  |
| MSTRG. 13327. 1  | noncoding | -0. 024576  | 1002  | 1140  | 4484  |
| MSTRG. 13329. 1  | noncoding | -0. 03072   | 1836  | 1998  | 2182  |
| MSTRG. 13331. 1  | noncoding | -0. 0253952 | 102   | 618   | 965   |
| MSTRG. 13332. 1  | noncoding | -0. 192512  | 567   | 591   | 1041  |
| MSTRG. 13332. 2  | noncoding | -0. 192512  | 564   | 588   | 977   |
| MSTRG. 13332. 3  | noncoding | -0. 004096  | 180   | 285   | 2329  |
| MSTRG. 13334. 1  | noncoding | -0. 053248  | 267   | 351   | 848   |
| MSTRG. 13334. 4  | noncoding | -0. 0262144 | 1926  | 2055  | 2209  |
| MSTRG. 13318. 1  | coding    | 0. 158      | 0     | 2103  | 2326  |
| MSTRG. 13345. 1  | noncoding | -0. 069632  | 1563  | 1641  | 2559  |
| MSTRG. 13356. 1  | coding    | 0. 083      | 510   | 2214  | 3997  |
| MSTRG. 13357. 1  | noncoding | -0. 0094208 | 2280  | 2430  | 3200  |
| MSTRG. 13356. 3  | coding    | 0. 075      | 1551  | 2781  | 4237  |
| MSTRG. 13356. 4  | coding    | 0. 083      | 696   | 2400  | 3824  |
| MSTRG. 13356. 5  | coding    | 0. 108      | 504   | 912   | 9374  |
| MSTRG. 13364. 2  | coding    | 0. 168      | 135   | 576   | 4031  |
| MSTRG. 13365. 1  | noncoding | -0. 0004096 | 0     | 132   | 310   |

|                  |           |             |       |       |       |
|------------------|-----------|-------------|-------|-------|-------|
| MSTRG. 13366. 3  | noncoding | -0. 0188416 | 327   | 504   | 3279  |
| MSTRG. 13367. 1  | noncoding | -0. 02048   | 0     | 66    | 440   |
| MSTRG. 13367. 2  | noncoding | -0. 02048   | 0     | 66    | 426   |
| MSTRG. 13369. 2  | coding    | 0. 192      | 585   | 969   | 1561  |
| MSTRG. 13369. 4  | coding    | 0. 192      | 378   | 762   | 1354  |
| MSTRG. 13369. 3  | coding    | 0. 192      | 381   | 765   | 1573  |
| MSTRG. 13378. 1  | noncoding | -0. 0335872 | 597   | 846   | 1772  |
| MSTRG. 13378. 2  | noncoding | -0. 008192  | 231   | 345   | 1099  |
| MSTRG. 13381. 2  | noncoding | -0. 008192  | 180   | 318   | 970   |
| MSTRG. 13389. 1  | coding    | 0. 127      | 102   | 2319  | 5551  |
| MSTRG. 13391. 6  | coding    | 0. 11       | 555   | 1656  | 2218  |
| MSTRG. 13391. 3  | coding    | 0. 089      | 606   | 2043  | 2607  |
| MSTRG. 13396. 1  | noncoding | -0. 0032768 | 2448  | 2580  | 3253  |
| MSTRG. 13397. 1  | noncoding | -0. 0229376 | 15882 | 16047 | 16732 |
| MSTRG. 13398. 1  | noncoding | -0. 012288  | 4131  | 4197  | 6856  |
| MSTRG. 13401. 1  | noncoding | -0. 03072   | 1281  | 1434  | 5315  |
| MSTRG. 13409. 2  | coding    | 0. 249      | 102   | 4677  | 5574  |
| MSTRG. 13410. 1  | noncoding | -0. 0208896 | 1071  | 1383  | 2171  |
| MSTRG. 13410. 2  | noncoding | -0. 0208896 | 1071  | 1383  | 1976  |
| MSTRG. 13409. 3  | coding    | 0. 248      | 732   | 5106  | 6065  |
| MSTRG. 13409. 4  | coding    | 0. 256      | 222   | 4020  | 4917  |
| MSTRG. 13409. 5  | coding    | 0. 258      | 60    | 3687  | 4646  |
| MSTRG. 13409. 8  | coding    | 0. 253      | 519   | 3849  | 4745  |
| MSTRG. 13409. 6  | coding    | 0. 255      | 609   | 3918  | 4876  |
| MSTRG. 13409. 7  | coding    | 0. 256      | 519   | 3834  | 4794  |
| MSTRG. 13409. 9  | coding    | 0. 255      | 456   | 3765  | 4663  |
| MSTRG. 13411. 1  | noncoding | -0. 0385024 | 2514  | 2757  | 5880  |
| MSTRG. 13411. 4  | coding    | 0. 181      | 114   | 2034  | 2341  |
| MSTRG. 13423. 1  | noncoding | -0. 0028672 | 0     | 81    | 236   |
| MSTRG. 13425. 1  | noncoding | -0. 0274432 | 17091 | 17391 | 19056 |
| MSTRG. 13427. 1  | noncoding | -0. 0196608 | 1500  | 1668  | 9357  |
| MSTRG. 13427. 2  | coding    | 0. 289      | 0     | 198   | 2109  |
| MSTRG. 13427. 4  | coding    | 0. 289      | 0     | 198   | 2215  |
| MSTRG. 13427. 3  | noncoding | -0. 0487424 | 1644  | 2034  | 2190  |
| MSTRG. 13427. 6  | coding    | 0. 071      | 957   | 1281  | 1710  |
| MSTRG. 13427. 8  | coding    | 0. 15       | 651   | 1215  | 2364  |
| MSTRG. 13427. 9  | noncoding | -0. 0147456 | 1071  | 1257  | 1410  |
| MSTRG. 13427. 10 | noncoding | -0. 0446464 | 993   | 1221  | 1375  |
| MSTRG. 13427. 11 | coding    | 0. 129      | 0     | 231   | 514   |
| MSTRG. 13428. 1  | noncoding | -0. 008192  | 12624 | 12693 | 13897 |
| MSTRG. 13428. 2  | noncoding | -0. 065536  | 3237  | 3315  | 7330  |
| MSTRG. 13429. 1  | coding    | 0. 096      | 5151  | 5358  | 15878 |
| MSTRG. 13430. 1  | noncoding | -0. 0004096 | 1731  | 1887  | 2562  |
| MSTRG. 13431. 1  | noncoding | -0. 008192  | 2727  | 2814  | 13439 |
| MSTRG. 13431. 2  | noncoding | -0. 0380928 | 714   | 735   | 2707  |
| MSTRG. 13432. 1  | noncoding | -0. 0004096 | 1920  | 2058  | 8932  |
| MSTRG. 13413. 2  | coding    | 0. 182      | 0     | 516   | 815   |
| MSTRG. 13414. 1  | coding    | 0. 084      | 222   | 462   | 2412  |
| MSTRG. 13418. 1  | noncoding | -0. 0004096 | 444   | 522   | 2165  |
| MSTRG. 13420. 1  | coding    | 0. 142      | 339   | 642   | 3499  |
| MSTRG. 13421. 2  | coding    | 0. 32       | 117   | 996   | 4973  |
| MSTRG. 13419. 1  | noncoding | -0. 04096   | 18    | 132   | 456   |
| MSTRG. 13419. 2  | noncoding | -0. 065536  | 141   | 225   | 610   |
| MSTRG. 13419. 3  | noncoding | -0. 02048   | 141   | 246   | 536   |

|                 |           |             |       |       |       |
|-----------------|-----------|-------------|-------|-------|-------|
| MSTRG. 13433. 1 | noncoding | -0. 0274432 | 270   | 447   | 624   |
| MSTRG. 13437. 2 | coding    | 0. 078      | 663   | 1146  | 1836  |
| MSTRG. 13440. 1 | noncoding | -0. 0577536 | 1494  | 1881  | 2267  |
| MSTRG. 13449. 1 | noncoding | -0. 0987136 | 903   | 1344  | 1500  |
| MSTRG. 13450. 3 | coding    | 0. 329      | 3     | 2310  | 4178  |
| MSTRG. 13450. 2 | coding    | 0. 273      | 3     | 3339  | 8418  |
| MSTRG. 13451. 1 | noncoding | -0. 0036864 | 81    | 120   | 4089  |
| MSTRG. 13454. 2 | noncoding | -0. 028672  | 0     | 186   | 1270  |
| MSTRG. 13456. 1 | noncoding | -0. 0069632 | 342   | 489   | 5479  |
| MSTRG. 13456. 2 | noncoding | -0. 024576  | 6513  | 6597  | 7857  |
| MSTRG. 13457. 1 | noncoding | -0. 073728  | 636   | 765   | 5339  |
| MSTRG. 13459. 1 | noncoding | -0. 0004096 | 0     | 0     | 233   |
| MSTRG. 13461. 6 | noncoding | -0. 073728  | 1095  | 1185  | 1342  |
| MSTRG. 13461. 5 | noncoding | -0. 073728  | 2787  | 2877  | 3032  |
| MSTRG. 13462. 1 | noncoding | -0. 0004096 | 366   | 366   | 593   |
| MSTRG. 13481. 1 | noncoding | -0. 0581632 | 99    | 159   | 315   |
| MSTRG. 13486. 2 | coding    | 0. 357      | 414   | 1098  | 2853  |
| MSTRG. 13492. 1 | noncoding | -0. 1093632 | 0     | 396   | 1622  |
| MSTRG. 13506. 1 | noncoding | -0. 057344  | 300   | 360   | 689   |
| MSTRG. 13506. 2 | noncoding | -0. 0708608 | 426   | 984   | 2372  |
| MSTRG. 13506. 3 | noncoding | -0. 0659456 | 84    | 705   | 2147  |
| MSTRG. 13506. 4 | noncoding | -0. 0708608 | 96    | 654   | 1808  |
| MSTRG. 13510. 1 | coding    | 0. 037      | 2115  | 4869  | 8978  |
| MSTRG. 13510. 2 | coding    | 0. 037      | 1743  | 4497  | 6152  |
| MSTRG. 13510. 3 | coding    | 0. 037      | 1743  | 4494  | 5873  |
| MSTRG. 13510. 4 | coding    | 0. 037      | 2121  | 4872  | 6337  |
| MSTRG. 13510. 5 | coding    | 0. 047      | 1743  | 3768  | 5935  |
| MSTRG. 13510. 6 | coding    | 0. 041      | 2421  | 4617  | 6125  |
| MSTRG. 13497. 2 | coding    | 0. 279      | 1542  | 3105  | 4025  |
| MSTRG. 13504. 1 | noncoding | -0. 0004096 | 18    | 165   | 509   |
| MSTRG. 13512. 4 | coding    | 0. 102      | 390   | 1044  | 2063  |
| MSTRG. 13512. 6 | coding    | 0. 098      | 333   | 1065  | 2083  |
| MSTRG. 13512. 3 | coding    | 0. 099      | 72    | 1167  | 2311  |
| MSTRG. 13512. 7 | coding    | 0. 106      | 333   | 849   | 1993  |
| MSTRG. 13512. 8 | coding    | 0. 106      | 450   | 966   | 2111  |
| MSTRG. 13512. 9 | coding    | 0. 106      | 390   | 1188  | 2333  |
| MSTRG. 13518. 1 | coding    | 0. 433      | 0     | 1626  | 6002  |
| MSTRG. 13518. 3 | coding    | 0. 376      | 48    | 579   | 4004  |
| MSTRG. 13519. 1 | coding    | 0. 165      | 0     | 840   | 3161  |
| MSTRG. 13520. 4 | coding    | 0. 134      | 432   | 2277  | 2567  |
| MSTRG. 13531. 1 | noncoding | -0. 0004096 | 1725  | 1764  | 2193  |
| MSTRG. 13532. 1 | noncoding | -0. 0356352 | 132   | 297   | 2267  |
| MSTRG. 13532. 3 | noncoding | -0. 012288  | 252   | 357   | 1171  |
| MSTRG. 13532. 6 | noncoding | -0. 0356352 | 132   | 297   | 2342  |
| MSTRG. 13538. 2 | coding    | 0. 363      | 24    | 1938  | 3369  |
| MSTRG. 13540. 4 | coding    | 0. 425      | 0     | 924   | 1091  |
| MSTRG. 13543. 1 | coding    | 0. 15       | 195   | 456   | 1152  |
| MSTRG. 13554. 1 | coding    | 0. 066      | 10074 | 10656 | 11100 |
| MSTRG. 13555. 1 | noncoding | -0. 114688  | 1044  | 1047  | 1242  |
| MSTRG. 13560. 2 | noncoding | -0. 09216   | 0     | 711   | 1004  |
| MSTRG. 13560. 3 | coding    | 0. 258      | 36    | 603   | 1240  |
| MSTRG. 13562. 1 | noncoding | -0. 06144   | 60    | 363   | 534   |
| MSTRG. 13564. 1 | coding    | 0. 347      | 222   | 3360  | 4119  |
| MSTRG. 13564. 2 | coding    | 0. 348      | 249   | 3378  | 5158  |

|                  |           |             |      |      |       |
|------------------|-----------|-------------|------|------|-------|
| MSTRG. 13563. 1  | noncoding | -0. 0651264 | 525  | 1044 | 1750  |
| MSTRG. 13563. 2  | noncoding | -0. 034816  | 528  | 876  | 1304  |
| MSTRG. 13566. 3  | coding    | 0. 174      | 459  | 4614 | 4799  |
| MSTRG. 13568. 5  | coding    | 0. 132      | 948  | 2184 | 2777  |
| MSTRG. 13568. 6  | coding    | 0. 127      | 81   | 1302 | 1893  |
| MSTRG. 13570. 1  | coding    | 0. 305      | 60   | 3378 | 8162  |
| MSTRG. 13578. 1  | coding    | 0. 185      | 6183 | 8256 | 13202 |
| MSTRG. 13578. 4  | coding    | 0. 206      | 342  | 1887 | 6728  |
| MSTRG. 13578. 2  | coding    | 0. 185      | 5886 | 7959 | 12801 |
| MSTRG. 13578. 3  | coding    | 0. 185      | 6156 | 8229 | 13071 |
| MSTRG. 13578. 6  | coding    | 0. 185      | 6036 | 8109 | 12951 |
| MSTRG. 13578. 7  | coding    | 0. 185      | 6159 | 8232 | 13074 |
| MSTRG. 13578. 8  | coding    | 0. 185      | 5943 | 8016 | 12821 |
| MSTRG. 13578. 9  | coding    | 0. 185      | 6102 | 8175 | 12980 |
| MSTRG. 13578. 10 | coding    | 0. 185      | 6681 | 8754 | 13508 |
| MSTRG. 13578. 11 | coding    | 0. 185      | 5106 | 7179 | 11930 |
| MSTRG. 13579. 1  | noncoding | -0. 0417792 | 1482 | 1587 | 2688  |
| MSTRG. 13580. 1  | noncoding | -0. 0004096 | 0    | 0    | 577   |
| MSTRG. 13580. 2  | noncoding | -0. 0004096 | 0    | 0    | 391   |
| MSTRG. 13578. 12 | coding    | 0. 071      | 441  | 2418 | 3768  |
| MSTRG. 13578. 13 | coding    | 0. 068      | 2760 | 4791 | 6119  |
| MSTRG. 13578. 14 | coding    | 0. 069      | 6243 | 8217 | 9513  |
| MSTRG. 13578. 15 | coding    | 0. 071      | 486  | 2463 | 3758  |
| MSTRG. 13578. 16 | coding    | 0. 067      | 1794 | 3354 | 4320  |
| MSTRG. 13581. 1  | noncoding | -0. 073728  | 93   | 159  | 398   |
| MSTRG. 13583. 1  | noncoding | -0. 045056  | 975  | 1095 | 4186  |
| MSTRG. 13584. 2  | noncoding | -0. 057344  | 822  | 936  | 1192  |
| MSTRG. 13572. 3  | coding    | 0. 457      | 87   | 1764 | 2468  |
| MSTRG. 13573. 4  | coding    | 0. 234      | 159  | 1299 | 2347  |
| MSTRG. 13573. 5  | coding    | 0. 247      | 159  | 1239 | 2287  |
| MSTRG. 13573. 3  | coding    | 0. 252      | 423  | 2082 | 2747  |
| MSTRG. 13573. 7  | coding    | 0. 29       | 513  | 1926 | 2593  |
| MSTRG. 13573. 1  | coding    | 0. 251      | 498  | 2154 | 2820  |
| MSTRG. 13575. 2  | coding    | 0. 425      | 0    | 1347 | 3081  |
| MSTRG. 13576. 4  | coding    | 0. 296      | 654  | 1896 | 2187  |
| MSTRG. 13576. 3  | coding    | 0. 296      | 423  | 1665 | 1957  |
| MSTRG. 13576. 5  | coding    | 0. 273      | 0    | 906  | 1855  |
| MSTRG. 13576. 6  | coding    | 0. 302      | 1080 | 1656 | 1946  |
| MSTRG. 13576. 7  | coding    | 0. 233      | 423  | 1818 | 2110  |
| MSTRG. 13576. 8  | coding    | 0. 273      | 0    | 906  | 1864  |
| MSTRG. 13576. 9  | coding    | 0. 27       | 0    | 1002 | 1711  |
| MSTRG. 13577. 2  | noncoding | -0. 0065536 | 12   | 153  | 650   |
| MSTRG. 13577. 1  | noncoding | -0. 0065536 | 12   | 153  | 934   |
| MSTRG. 13577. 5  | noncoding | -0. 0028672 | 0    | 600  | 900   |
| MSTRG. 13577. 9  | noncoding | -0. 02048   | 111  | 219  | 502   |
| MSTRG. 13577. 10 | noncoding | -0. 02048   | 360  | 468  | 867   |
| MSTRG. 13577. 11 | noncoding | -0. 012288  | 339  | 603  | 904   |
| MSTRG. 13577. 6  | noncoding | -0. 012288  | 150  | 414  | 714   |
| MSTRG. 13577. 7  | noncoding | -0. 1728512 | 0    | 78   | 729   |
| MSTRG. 13577. 8  | noncoding | -0. 012288  | 222  | 486  | 786   |
| MSTRG. 13577. 12 | noncoding | -0. 049152  | 360  | 435  | 673   |
| MSTRG. 13589. 3  | coding    | 0. 122      | 0    | 1611 | 4795  |
| MSTRG. 13589. 4  | coding    | 0. 15       | 0    | 270  | 890   |
| MSTRG. 13589. 7  | coding    | 0. 473      | 0    | 780  | 2452  |

|                  |           |             |      |      |       |
|------------------|-----------|-------------|------|------|-------|
| MSTRG. 13589. 6  | coding    | 0. 27       | 0    | 1857 | 10320 |
| MSTRG. 13591. 1  | noncoding | -0. 032768  | 0    | 15   | 1840  |
| MSTRG. 13593. 5  | coding    | 0. 201      | 15   | 1581 | 2425  |
| MSTRG. 13593. 6  | coding    | 0. 202      | 510  | 2088 | 2912  |
| MSTRG. 13593. 7  | coding    | 0. 22       | 297  | 1671 | 2516  |
| MSTRG. 13594. 1  | noncoding | -0. 065536  | 2478 | 2556 | 3405  |
| MSTRG. 13593. 8  | coding    | 0. 22       | 2301 | 3675 | 4500  |
| MSTRG. 13595. 2  | coding    | 0. 347      | 0    | 978  | 2175  |
| MSTRG. 13595. 1  | coding    | 0. 34       | 0    | 966  | 2231  |
| MSTRG. 13596. 1  | noncoding | -0. 004096  | 678  | 726  | 1064  |
| MSTRG. 13597. 1  | noncoding | -0. 086016  | 555  | 597  | 1326  |
| MSTRG. 13586. 1  | coding    | 0. 158      | 99   | 4737 | 7327  |
| MSTRG. 13586. 2  | coding    | 0. 161      | 0    | 4533 | 5258  |
| MSTRG. 13586. 3  | coding    | 0. 16       | 0    | 4425 | 7014  |
| MSTRG. 13587. 1  | noncoding | -0. 0180224 | 1332 | 1506 | 2988  |
| MSTRG. 13598. 2  | coding    | 0. 081      | 1440 | 1632 | 1872  |
| MSTRG. 13599. 1  | coding    | 0. 23       | 12   | 960  | 3702  |
| MSTRG. 13599. 2  | coding    | 0. 246      | 0    | 837  | 1420  |
| MSTRG. 13599. 3  | coding    | 0. 244      | 54   | 894  | 1693  |
| MSTRG. 13599. 4  | noncoding | -0. 1040384 | 18   | 477  | 1778  |
| MSTRG. 13602. 1  | coding    | 0. 496      | 381  | 1311 | 2754  |
| MSTRG. 13602. 3  | coding    | 0. 495      | 0    | 1104 | 2549  |
| MSTRG. 13602. 5  | coding    | 0. 475      | 0    | 1107 | 2552  |
| MSTRG. 13600. 1  | noncoding | -0. 0540672 | 309  | 1227 | 2628  |
| MSTRG. 13603. 1  | noncoding | -0. 0217088 | 0    | 201  | 414   |
| MSTRG. 13603. 2  | noncoding | -0. 004096  | 471  | 594  | 824   |
| MSTRG. 13608. 3  | coding    | 0. 313      | 324  | 2337 | 4939  |
| MSTRG. 13608. 2  | coding    | 0. 346      | 0    | 2094 | 3797  |
| MSTRG. 13608. 6  | coding    | 0. 333      | 0    | 2016 | 2332  |
| MSTRG. 13608. 5  | coding    | 0. 332      | 0    | 2028 | 2405  |
| MSTRG. 13605. 1  | coding    | 0. 348      | 15   | 2766 | 3198  |
| MSTRG. 13612. 2  | coding    | 0. 233      | 156  | 459  | 807   |
| MSTRG. 13614. 2  | coding    | 0. 433      | 414  | 1980 | 2257  |
| MSTRG. 13618. 3  | coding    | 0. 418      | 450  | 1056 | 1428  |
| MSTRG. 13618. 1  | coding    | 0. 401      | 870  | 1638 | 3203  |
| MSTRG. 13618. 2  | coding    | 0. 401      | 981  | 1749 | 3793  |
| MSTRG. 13627. 2  | coding    | 0. 307      | 744  | 4359 | 5816  |
| MSTRG. 13627. 3  | coding    | 0. 307      | 96   | 3711 | 4930  |
| MSTRG. 13630. 1  | coding    | 0. 507      | 0    | 1245 | 1526  |
| MSTRG. 13637. 2  | coding    | 0. 603      | 0    | 1041 | 3378  |
| MSTRG. 13657. 4  | coding    | 0. 298      | 240  | 798  | 3515  |
| MSTRG. 13658. 8  | coding    | 0. 142      | 0    | 1701 | 2719  |
| MSTRG. 13666. 4  | noncoding | -0. 0421888 | 855  | 1095 | 1250  |
| MSTRG. 13666. 3  | noncoding | -0. 100352  | 1032 | 1257 | 1414  |
| MSTRG. 13666. 5  | noncoding | -0. 0344064 | 852  | 1029 | 1186  |
| MSTRG. 13666. 2  | noncoding | -0. 0679936 | 966  | 1296 | 1450  |
| MSTRG. 13667. 1  | coding    | 0. 274      | 15   | 3885 | 4591  |
| MSTRG. 13667. 5  | coding    | 0. 394      | 4428 | 5964 | 6670  |
| MSTRG. 13667. 6  | coding    | 0. 286      | 0    | 3663 | 4370  |
| MSTRG. 13667. 13 | coding    | 0. 394      | 4554 | 6102 | 6776  |
| MSTRG. 13667. 12 | coding    | 0. 395      | 3279 | 4812 | 5518  |
| MSTRG. 13652. 1  | coding    | 0. 385      | 771  | 1704 | 2000  |
| MSTRG. 13652. 2  | coding    | 0. 385      | 528  | 1461 | 1752  |
| MSTRG. 13652. 3  | noncoding | -0. 0823296 | 0    | 84   | 426   |

|                  |           |             |       |       |       |
|------------------|-----------|-------------|-------|-------|-------|
| MSTRG. 13653. 2  | coding    | 0. 342      | 0     | 927   | 1263  |
| MSTRG. 13653. 3  | coding    | 0. 327      | 96    | 630   | 967   |
| MSTRG. 13669. 2  | coding    | 0. 32       | 150   | 1830  | 2260  |
| MSTRG. 13671. 1  | noncoding | -0. 0311296 | 138   | 312   | 1515  |
| MSTRG. 13672. 6  | coding    | 0. 321      | 0     | 1362  | 1711  |
| MSTRG. 13672. 5  | coding    | 0. 294      | 0     | 1413  | 1771  |
| MSTRG. 13672. 4  | coding    | 0. 328      | 0     | 1230  | 1592  |
| MSTRG. 13682. 1  | noncoding | -0. 098304  | 72    | 111   | 932   |
| MSTRG. 13684. 1  | noncoding | -0. 004096  | 153   | 162   | 334   |
| MSTRG. 13687. 2  | noncoding | -0. 090112  | 21    | 78    | 387   |
| MSTRG. 13690. 1  | coding    | 0. 189      | 507   | 990   | 1717  |
| MSTRG. 13690. 2  | coding    | 0. 222      | 777   | 1272  | 1900  |
| MSTRG. 13690. 5  | coding    | 0. 214      | 348   | 777   | 1380  |
| MSTRG. 13690. 3  | coding    | 0. 189      | 342   | 825   | 1394  |
| MSTRG. 13690. 4  | coding    | 0. 186      | 270   | 750   | 1353  |
| MSTRG. 13711. 1  | coding    | 0. 239      | 267   | 8046  | 13519 |
| MSTRG. 13711. 2  | coding    | 0. 246      | 120   | 6996  | 7460  |
| MSTRG. 13711. 3  | coding    | 0. 151      | 180   | 12459 | 13601 |
| MSTRG. 13711. 4  | coding    | 0. 237      | 171   | 7923  | 8387  |
| MSTRG. 13711. 5  | coding    | 0. 239      | 237   | 8016  | 13491 |
| MSTRG. 13711. 6  | coding    | 0. 239      | 24    | 6825  | 7295  |
| MSTRG. 13713. 1  | coding    | 0. 166      | 48    | 1731  | 1930  |
| MSTRG. 13713. 3  | coding    | 0. 155      | 48    | 1761  | 1960  |
| MSTRG. 13713. 2  | coding    | 0. 156      | 222   | 1938  | 2137  |
| MSTRG. 13706. 1  | coding    | 0. 239      | 705   | 1533  | 1926  |
| MSTRG. 13706. 18 | coding    | 0. 218      | 381   | 1251  | 1643  |
| MSTRG. 13706. 20 | coding    | 0. 237      | 591   | 1419  | 2156  |
| MSTRG. 13706. 17 | coding    | 0. 219      | 297   | 1164  | 1918  |
| MSTRG. 13709. 1  | noncoding | -0. 036864  | 4932  | 5022  | 5719  |
| MSTRG. 13706. 22 | coding    | 0. 237      | 6984  | 7809  | 8201  |
| MSTRG. 13727. 1  | coding    | 0. 277      | 2289  | 3381  | 4278  |
| MSTRG. 13727. 2  | coding    | 0. 274      | 687   | 1776  | 2497  |
| MSTRG. 13727. 3  | coding    | 0. 274      | 120   | 1209  | 2105  |
| MSTRG. 13727. 4  | coding    | 0. 275      | 126   | 1215  | 2107  |
| MSTRG. 13725. 4  | coding    | 0. 181      | 13563 | 14268 | 14520 |
| MSTRG. 13725. 6  | coding    | 0. 093      | 342   | 528   | 3769  |
| MSTRG. 13725. 7  | coding    | 0. 109      | 408   | 1167  | 7428  |
| MSTRG. 13725. 10 | coding    | 0. 073      | 192   | 1122  | 2491  |
| MSTRG. 13725. 12 | coding    | 0. 109      | 441   | 1200  | 2084  |
| MSTRG. 13725. 13 | coding    | 0. 109      | 408   | 1167  | 2052  |
| MSTRG. 13729. 1  | noncoding | -0. 135168  | 117   | 186   | 579   |
| MSTRG. 13714. 3  | coding    | 0. 31       | 0     | 432   | 822   |
| MSTRG. 13717. 1  | noncoding | -0. 016384  | 252   | 270   | 427   |
| MSTRG. 13723. 1  | coding    | 0. 186      | 750   | 1473  | 14612 |
| MSTRG. 13738. 1  | coding    | 0. 123      | 318   | 1155  | 1309  |
| MSTRG. 13746. 1  | noncoding | -0. 098304  | 27    | 66    | 680   |
| MSTRG. 13746. 2  | noncoding | -0. 110592  | 54    | 66    | 431   |
| MSTRG. 13755. 2  | coding    | 0. 199      | 0     | 243   | 472   |
| MSTRG. 13755. 1  | coding    | 0. 21       | 4632  | 8013  | 10666 |
| MSTRG. 13755. 3  | coding    | 0. 21       | 1233  | 4629  | 7685  |
| MSTRG. 13755. 5  | coding    | 0. 224      | 0     | 3351  | 4895  |
| MSTRG. 13755. 6  | coding    | 0. 223      | 0     | 3306  | 5957  |
| MSTRG. 13756. 1  | noncoding | -0. 002048  | 3801  | 3888  | 8521  |
| MSTRG. 13758. 2  | noncoding | -0. 069632  | 3858  | 3969  | 4123  |



|                 |           |             |       |       |       |
|-----------------|-----------|-------------|-------|-------|-------|
| MSTRG. 13758. 3 | noncoding | -0. 0024576 | 11778 | 11931 | 12094 |
| MSTRG. 13758. 4 | noncoding | -0. 0024576 | 1950  | 2103  | 2268  |
| MSTRG. 13750. 1 | noncoding | -0. 032768  | 0     | 57    | 349   |
| MSTRG. 13760. 1 | coding    | 0. 093      | 1590  | 1878  | 3236  |
| MSTRG. 13760. 2 | noncoding | -0. 098304  | 1485  | 1542  | 2170  |
| MSTRG. 13759. 2 | coding    | 0. 159      | 75    | 657   | 1190  |
| MSTRG. 13761. 2 | coding    | 0. 342      | 186   | 6732  | 8413  |
| MSTRG. 13767. 1 | noncoding | -0. 0155648 | 78    | 240   | 2323  |
| MSTRG. 13768. 4 | coding    | 0. 153      | 240   | 4395  | 6001  |
| MSTRG. 13768. 3 | coding    | 0. 153      | 474   | 4629  | 6243  |
| MSTRG. 13768. 2 | coding    | 0. 153      | 441   | 4596  | 6228  |
| MSTRG. 13768. 5 | coding    | 0. 15       | 441   | 2163  | 2957  |
| MSTRG. 13769. 1 | noncoding | -0. 02048   | 588   | 720   | 1719  |
| MSTRG. 13768. 7 | coding    | 0. 19       | 306   | 1374  | 3006  |
| MSTRG. 13765. 1 | noncoding | -0. 0499712 | 510   | 807   | 3803  |
| MSTRG. 13765. 2 | noncoding | -0. 0499712 | 381   | 678   | 3416  |
| MSTRG. 13764. 1 | coding    | 0. 39       | 0     | 1125  | 1380  |
| MSTRG. 13780. 2 | noncoding | -0. 0319488 | 114   | 300   | 1546  |
| MSTRG. 13782. 1 | noncoding | -0. 0155648 | 2049  | 2169  | 5994  |
| MSTRG. 13780. 3 | noncoding | -0. 147456  | 5016  | 5037  | 5589  |
| MSTRG. 13783. 1 | noncoding | -0. 0004096 | 417   | 528   | 843   |
| MSTRG. 13784. 1 | noncoding | -0. 053248  | 2223  | 2253  | 3620  |
| MSTRG. 13808. 1 | coding    | 0. 171      | 423   | 1083  | 9578  |
| MSTRG. 13808. 3 | coding    | 0. 156      | 51    | 846   | 1873  |
| MSTRG. 13808. 4 | coding    | 0. 156      | 51    | 846   | 1479  |
| MSTRG. 13808. 2 | coding    | 0. 156      | 51    | 846   | 5053  |
| MSTRG. 13808. 5 | noncoding | -0. 0270336 | 11592 | 11772 | 30793 |
| MSTRG. 13809. 1 | noncoding | -0. 022528  | 783   | 924   | 3023  |
| MSTRG. 13811. 1 | noncoding | -0. 004096  | 840   | 969   | 1608  |
| MSTRG. 13819. 3 | coding    | 0. 224      | 54    | 612   | 1350  |
| MSTRG. 13820. 1 | noncoding | -0. 294912  | 339   | 357   | 633   |
| MSTRG. 13813. 1 | noncoding | -0. 0004096 | 0     | 0     | 437   |
| MSTRG. 13822. 1 | noncoding | -0. 0135168 | 897   | 993   | 1996  |
| MSTRG. 13829. 1 | noncoding | -0. 04096   | 66    | 75    | 244   |
| MSTRG. 13831. 2 | coding    | 0. 089      | 1182  | 1410  | 1564  |
| MSTRG. 13831. 3 | coding    | 0. 113      | 2358  | 3666  | 3820  |
| MSTRG. 13832. 1 | noncoding | -0. 0004096 | 459   | 630   | 1141  |
| MSTRG. 13831. 4 | coding    | 0. 125      | 438   | 1377  | 2074  |
| MSTRG. 13836. 1 | coding    | 0. 307      | 405   | 1614  | 3442  |
| MSTRG. 13837. 1 | noncoding | -0. 131072  | 4707  | 4767  | 6296  |
| MSTRG. 13838. 5 | coding    | 0. 28       | 432   | 3678  | 3930  |
| MSTRG. 13838. 6 | coding    | 0. 233      | 2145  | 4200  | 4526  |
| MSTRG. 13834. 2 | coding    | 0. 052      | 30    | 3279  | 3766  |
| MSTRG. 13844. 2 | coding    | 0. 341      | 13296 | 14697 | 17341 |
| MSTRG. 13844. 4 | coding    | 0. 347      | 0     | 2244  | 4332  |
| MSTRG. 13845. 1 | coding    | 0. 121      | 15    | 1041  | 2037  |
| MSTRG. 13846. 1 | coding    | 0. 321      | 279   | 1281  | 1704  |
| MSTRG. 13846. 2 | coding    | 0. 306      | 300   | 1260  | 1684  |
| MSTRG. 13854. 3 | coding    | 0. 357      | 0     | 1341  | 2126  |
| MSTRG. 13849. 2 | coding    | 0. 389      | 0     | 819   | 1795  |
| MSTRG. 13858. 2 | coding    | 0. 198      | 0     | 5232  | 6679  |
| MSTRG. 13859. 1 | noncoding | -0. 0004096 | 0     | 0     | 2133  |
| MSTRG. 13862. 3 | noncoding | -0. 0339968 | 3828  | 4083  | 7126  |
| MSTRG. 13862. 2 | coding    | 0. 113      | 405   | 1533  | 4567  |

|                  |           |             |      |       |       |
|------------------|-----------|-------------|------|-------|-------|
| MSTRG. 13862. 4  | coding    | 0. 113      | 333  | 1461  | 2203  |
| MSTRG. 13862. 5  | noncoding | -0. 0868352 | 90   | 153   | 1135  |
| MSTRG. 13867. 1  | coding    | 0. 08       | 549  | 1890  | 2965  |
| MSTRG. 13870. 4  | coding    | 0. 318      | 0    | 3102  | 3872  |
| MSTRG. 13871. 3  | coding    | 0. 393      | 510  | 2994  | 4186  |
| MSTRG. 13871. 4  | coding    | 0. 377      | 816  | 3084  | 3679  |
| MSTRG. 13877. 3  | coding    | 0. 09       | 486  | 8868  | 11597 |
| MSTRG. 13877. 4  | coding    | 0. 09       | 486  | 8721  | 11450 |
| MSTRG. 13877. 5  | coding    | 0. 084      | 4095 | 8715  | 11446 |
| MSTRG. 13884. 4  | coding    | 0. 343      | 18   | 4686  | 6890  |
| MSTRG. 13884. 6  | coding    | 0. 347      | 465  | 5031  | 7299  |
| MSTRG. 13884. 5  | coding    | 0. 347      | 465  | 5031  | 7321  |
| MSTRG. 13884. 7  | coding    | 0. 347      | 465  | 5031  | 7317  |
| MSTRG. 13884. 8  | coding    | 0. 337      | 33   | 3714  | 5865  |
| MSTRG. 13885. 2  | coding    | 0. 439      | 0    | 330   | 1285  |
| MSTRG. 13885. 3  | coding    | 0. 415      | 0    | 681   | 1238  |
| MSTRG. 13882. 1  | coding    | 0. 351      | 72   | 1494  | 4432  |
| MSTRG. 13881. 1  | coding    | 0. 381      | 72   | 840   | 2323  |
| MSTRG. 13886. 2  | coding    | 0. 313      | 0    | 2124  | 4768  |
| MSTRG. 13886. 5  | coding    | 0. 298      | 51   | 1509  | 1860  |
| MSTRG. 13888. 1  | coding    | 0. 155      | 399  | 639   | 827   |
| MSTRG. 13900. 1  | noncoding | -0. 0004096 | 72   | 192   | 420   |
| MSTRG. 13902. 1  | coding    | 0. 243      | 150  | 558   | 1100  |
| MSTRG. 13903. 3  | coding    | 0. 096      | 1659 | 5427  | 8137  |
| MSTRG. 13904. 1  | noncoding | -0. 110592  | 156  | 174   | 375   |
| MSTRG. 13908. 1  | coding    | 0. 184      | 0    | 13383 | 17807 |
| MSTRG. 13908. 2  | coding    | 0. 167      | 3684 | 15108 | 16660 |
| MSTRG. 13910. 2  | coding    | 0. 255      | 3513 | 7074  | 7793  |
| MSTRG. 13910. 5  | coding    | 0. 131      | 1797 | 5217  | 6489  |
| MSTRG. 13910. 6  | coding    | 0. 133      | 534  | 3771  | 4301  |
| MSTRG. 13913. 3  | coding    | 0. 059      | 492  | 3534  | 5468  |
| MSTRG. 13913. 4  | noncoding | -0. 032768  | 2850 | 2946  | 5779  |
| MSTRG. 13891. 1  | coding    | 0. 117      | 141  | 372   | 920   |
| MSTRG. 13899. 1  | noncoding | -0. 049152  | 645  | 651   | 1414  |
| MSTRG. 13918. 2  | coding    | 0. 202      | 768  | 1059  | 1296  |
| MSTRG. 13918. 3  | coding    | 0. 239      | 0    | 321   | 558   |
| MSTRG. 13919. 2  | coding    | 0. 356      | 627  | 1821  | 2782  |
| MSTRG. 13919. 1  | coding    | 0. 356      | 1053 | 2247  | 4283  |
| MSTRG. 13940. 1  | noncoding | -0. 0598016 | 2856 | 3723  | 4225  |
| MSTRG. 13941. 2  | noncoding | -0. 118784  | 0    | 618   | 2032  |
| MSTRG. 13941. 3  | noncoding | -0. 131072  | 0    | 549   | 1812  |
| MSTRG. 13942. 1  | noncoding | -0. 0405504 | 576  | 762   | 1157  |
| MSTRG. 13942. 2  | noncoding | -0. 053248  | 135  | 210   | 1709  |
| MSTRG. 13942. 3  | noncoding | -0. 0126976 | 141  | 258   | 727   |
| MSTRG. 13942. 4  | noncoding | -0. 0233472 | 258  | 516   | 1017  |
| MSTRG. 13942. 5  | noncoding | -0. 0294912 | 126  | 282   | 437   |
| MSTRG. 13942. 6  | noncoding | -0. 0262144 | 0    | 357   | 514   |
| MSTRG. 13942. 7  | noncoding | -0. 053248  | 129  | 204   | 574   |
| MSTRG. 13942. 10 | noncoding | -0. 008192  | 0    | 135   | 290   |
| MSTRG. 13942. 11 | noncoding | -0. 0376832 | 183  | 321   | 564   |
| MSTRG. 13942. 12 | noncoding | -0. 0131072 | 213  | 315   | 559   |
| MSTRG. 13942. 8  | noncoding | -0. 02048   | 153  | 255   | 482   |
| MSTRG. 13942. 9  | noncoding | -0. 0004096 | 213  | 327   | 571   |
| MSTRG. 13942. 13 | noncoding | -0. 0270336 | 210  | 324   | 574   |

|                  |           |             |      |       |       |
|------------------|-----------|-------------|------|-------|-------|
| MSTRG. 13942. 17 | noncoding | -0. 0290816 | 129  | 321   | 569   |
| MSTRG. 13942. 18 | noncoding | -0. 0004096 | 66   | 144   | 431   |
| MSTRG. 13942. 19 | noncoding | -0. 065536  | 0    | 66    | 453   |
| MSTRG. 13942. 20 | noncoding | -0. 008192  | 144  | 285   | 505   |
| MSTRG. 13942. 14 | noncoding | -0. 0057344 | 177  | 324   | 576   |
| MSTRG. 13942. 15 | noncoding | -0. 1220608 | 0    | 57    | 310   |
| MSTRG. 13942. 16 | noncoding | -0. 0004096 | 0    | 144   | 476   |
| MSTRG. 13942. 21 | noncoding | -0. 0114688 | 66   | 288   | 539   |
| MSTRG. 13942. 22 | noncoding | -0. 0303104 | 129  | 315   | 541   |
| MSTRG. 13942. 25 | noncoding | -0. 073728  | 0    | 66    | 450   |
| MSTRG. 13942. 27 | noncoding | -0. 014336  | 63   | 186   | 431   |
| MSTRG. 13942. 28 | noncoding | -0. 0004096 | 120  | 219   | 506   |
| MSTRG. 13942. 29 | noncoding | -0. 012288  | 0    | 129   | 407   |
| MSTRG. 13942. 30 | noncoding | -0. 0176128 | 0    | 150   | 317   |
| MSTRG. 13942. 31 | noncoding | -0. 0036864 | 168  | 273   | 517   |
| MSTRG. 13942. 23 | noncoding | -0. 06144   | 252  | 336   | 560   |
| MSTRG. 13942. 24 | noncoding | -0. 0274432 | 198  | 339   | 583   |
| MSTRG. 13942. 26 | noncoding | -0. 057344  | 237  | 315   | 540   |
| MSTRG. 13942. 32 | noncoding | -0. 0004096 | 210  | 321   | 566   |
| MSTRG. 13942. 33 | noncoding | -0. 110592  | 0    | 72    | 226   |
| MSTRG. 13927. 1  | coding    | 0. 219      | 0    | 585   | 4329  |
| MSTRG. 13928. 2  | coding    | 0. 039      | 0    | 2994  | 4413  |
| MSTRG. 13944. 3  | coding    | 0. 04       | 591  | 1275  | 3163  |
| MSTRG. 13945. 1  | noncoding | -0. 073728  | 711  | 756   | 1034  |
| MSTRG. 13946. 3  | coding    | 0. 123      | 132  | 1899  | 2206  |
| MSTRG. 13929. 2  | noncoding | -0. 1007616 | 0    | 393   | 2321  |
| MSTRG. 13930. 2  | noncoding | -0. 008192  | 993  | 1134  | 3570  |
| MSTRG. 13952. 1  | coding    | 0. 341      | 150  | 1227  | 3172  |
| MSTRG. 13952. 2  | coding    | 0. 339      | 150  | 1173  | 1351  |
| MSTRG. 13952. 3  | coding    | 0. 299      | 150  | 600   | 1141  |
| MSTRG. 13955. 1  | noncoding | -0. 21504   | 21   | 27    | 703   |
| MSTRG. 13962. 2  | noncoding | -0. 0458752 | 69   | 357   | 842   |
| MSTRG. 13964. 1  | noncoding | -0. 0217088 | 0    | 90    | 515   |
| MSTRG. 13965. 1  | noncoding | -0. 024576  | 186  | 234   | 573   |
| MSTRG. 13969. 2  | noncoding | -0. 0192512 | 159  | 189   | 941   |
| MSTRG. 13971. 1  | noncoding | -0. 004096  | 0    | 144   | 564   |
| MSTRG. 13981. 1  | noncoding | -0. 045056  | 426  | 549   | 957   |
| MSTRG. 13981. 2  | noncoding | -0. 045056  | 435  | 558   | 1043  |
| MSTRG. 13982. 1  | coding    | 0. 26       | 189  | 609   | 1761  |
| MSTRG. 13983. 1  | noncoding | -0. 0405504 | 1914 | 2037  | 2196  |
| MSTRG. 13984. 1  | coding    | 0. 405      | 2388 | 4158  | 8561  |
| MSTRG. 13984. 3  | coding    | 0. 387      | 4020 | 5925  | 9352  |
| MSTRG. 13984. 4  | coding    | 0. 403      | 2388 | 4146  | 5030  |
| MSTRG. 13986. 1  | noncoding | -0. 0151552 | 1392 | 1422  | 4276  |
| MSTRG. 13980. 2  | noncoding | -0. 0712704 | 1347 | 1530  | 2438  |
| MSTRG. 14009. 1  | coding    | 0. 109      | 3288 | 14670 | 15198 |
| MSTRG. 14009. 2  | coding    | 0. 109      | 3273 | 14655 | 16435 |
| MSTRG. 14009. 3  | coding    | 0. 11       | 3261 | 14601 | 15522 |
| MSTRG. 14009. 4  | coding    | 0. 11       | 3228 | 14613 | 15160 |
| MSTRG. 14010. 7  | coding    | 0. 059      | 2379 | 2625  | 2779  |
| MSTRG. 14010. 6  | coding    | 0. 06       | 204  | 1524  | 1679  |
| MSTRG. 14010. 8  | coding    | 0. 066      | 960  | 1182  | 1337  |
| MSTRG. 14010. 9  | coding    | 0. 067      | 1560 | 1986  | 10060 |
| MSTRG. 13999. 1  | noncoding | -0. 03072   | 252  | 633   | 1012  |

|                  |           |             |       |       |       |
|------------------|-----------|-------------|-------|-------|-------|
| MSTRG. 14003. 1  | noncoding | -0. 0421888 | 0     | 528   | 862   |
| MSTRG. 14003. 4  | noncoding | -0. 026624  | 165   | 249   | 424   |
| MSTRG. 14001. 2  | coding    | 0. 211      | 0     | 876   | 1870  |
| MSTRG. 14014. 1  | noncoding | -0. 0004096 | 72    | 72    | 250   |
| MSTRG. 14034. 2  | noncoding | -0. 137216  | 0     | 141   | 3261  |
| MSTRG. 14035. 1  | noncoding | -0. 012288  | 2433  | 2529  | 3195  |
| MSTRG. 14036. 1  | noncoding | -0. 0339968 | 819   | 969   | 24748 |
| MSTRG. 14037. 1  | coding    | 0. 121      | 1830  | 2061  | 4259  |
| MSTRG. 14036. 2  | noncoding | -0. 0249856 | 12732 | 12882 | 13036 |
| MSTRG. 14038. 1  | noncoding | -0. 0319488 | 156   | 270   | 2409  |
| MSTRG. 14038. 2  | noncoding | -0. 0176128 | 1047  | 1206  | 6039  |
| MSTRG. 14039. 1  | noncoding | -0. 0024576 | 14970 | 15141 | 24583 |
| MSTRG. 14039. 2  | coding    | 0. 077      | 7539  | 8091  | 14630 |
| MSTRG. 14041. 1  | noncoding | -0. 0585728 | 18348 | 18702 | 29071 |
| MSTRG. 14034. 3  | coding    | 0. 215      | 1836  | 2976  | 5279  |
| MSTRG. 14034. 5  | noncoding | -0. 045056  | 2364  | 2436  | 6592  |
| MSTRG. 14034. 6  | coding    | 0. 217      | 123   | 1287  | 3602  |
| MSTRG. 14043. 1  | noncoding | -0. 053248  | 1623  | 1683  | 2018  |
| MSTRG. 14026. 1  | coding    | 0. 073      | 795   | 999   | 1305  |
| MSTRG. 14029. 2  | noncoding | -0. 0159744 | 678   | 816   | 972   |
| MSTRG. 14030. 1  | noncoding | -0. 0516096 | 39    | 192   | 2576  |
| MSTRG. 14059. 4  | coding    | 0. 146      | 1293  | 2046  | 4551  |
| MSTRG. 14059. 3  | coding    | 0. 146      | 2580  | 3333  | 4782  |
| MSTRG. 14059. 5  | coding    | 0. 144      | 1176  | 1926  | 3374  |
| MSTRG. 14059. 6  | coding    | 0. 146      | 1143  | 1896  | 3345  |
| MSTRG. 14060. 2  | noncoding | -0. 0004096 | 0     | 0     | 772   |
| MSTRG. 14063. 1  | noncoding | -0. 057344  | 126   | 240   | 1197  |
| MSTRG. 14066. 3  | coding    | 0. 356      | 0     | 651   | 3681  |
| MSTRG. 14047. 1  | noncoding | -0. 0282624 | 126   | 150   | 954   |
| MSTRG. 14050. 4  | coding    | 0. 12       | 789   | 1302  | 1466  |
| MSTRG. 14069. 1  | coding    | 0. 181      | 0     | 1104  | 5119  |
| MSTRG. 14069. 2  | coding    | 0. 137      | 1599  | 2472  | 2838  |
| MSTRG. 14075. 1  | coding    | 0. 079      | 1329  | 2148  | 3187  |
| MSTRG. 14075. 6  | coding    | 0. 079      | 1107  | 1926  | 3938  |
| MSTRG. 14076. 1  | noncoding | -0. 073728  | 153   | 258   | 1690  |
| MSTRG. 14077. 1  | coding    | 0. 102      | 5433  | 6588  | 7032  |
| MSTRG. 14077. 2  | coding    | 0. 111      | 0     | 528   | 880   |
| MSTRG. 14079. 1  | noncoding | -0. 0208896 | 3207  | 3444  | 4130  |
| MSTRG. 14079. 2  | noncoding | -0. 0004096 | 315   | 453   | 1810  |
| MSTRG. 14081. 1  | noncoding | -0. 0110592 | 162   | 210   | 1976  |
| MSTRG. 14082. 1  | noncoding | -0. 0385024 | 390   | 591   | 847   |
| MSTRG. 14083. 1  | noncoding | -0. 008192  | 5064  | 5190  | 5587  |
| MSTRG. 14084. 1  | coding    | 0. 128      | 3903  | 4176  | 5103  |
| MSTRG. 14085. 1  | coding    | 0. 091      | 17847 | 18483 | 20800 |
| MSTRG. 14093. 10 | noncoding | -0. 0868352 | 4680  | 5202  | 5357  |
| MSTRG. 14093. 11 | noncoding | -0. 049152  | 243   | 345   | 4620  |
| MSTRG. 14093. 4  | noncoding | -0. 049152  | 447   | 570   | 4843  |
| MSTRG. 14093. 5  | noncoding | -0. 0692224 | 5277  | 5871  | 6027  |
| MSTRG. 14093. 6  | noncoding | -0. 0376832 | 54    | 204   | 4442  |
| MSTRG. 14093. 7  | noncoding | -0. 0376832 | 54    | 204   | 4479  |
| MSTRG. 14093. 9  | noncoding | -0. 049152  | 420   | 522   | 4760  |
| MSTRG. 14093. 12 | noncoding | -0. 049152  | 4389  | 4491  | 8766  |
| MSTRG. 14094. 1  | noncoding | -0. 0114688 | 2517  | 2709  | 3934  |
| MSTRG. 14095. 1  | noncoding | -0. 0004096 | 2169  | 2265  | 2474  |

|                  |           |             |       |       |       |
|------------------|-----------|-------------|-------|-------|-------|
| MSTRG. 14099. 1  | coding    | 0. 072      | 1896  | 2463  | 3720  |
| MSTRG. 14100. 2  | coding    | 0. 091      | 0     | 663   | 1616  |
| MSTRG. 14089. 2  | coding    | 0. 074      | 4260  | 5259  | 10189 |
| MSTRG. 14109. 1  | noncoding | -0. 0004096 | 0     | 0     | 562   |
| MSTRG. 14115. 3  | coding    | 0. 114      | 0     | 1647  | 5607  |
| MSTRG. 14126. 1  | noncoding | -0. 0004096 | 0     | 0     | 241   |
| MSTRG. 14127. 1  | coding    | 0. 046      | 1164  | 1431  | 2463  |
| MSTRG. 14130. 1  | noncoding | -0. 0086016 | 465   | 585   | 1699  |
| MSTRG. 14141. 6  | noncoding | -0. 0315392 | 4035  | 4443  | 4597  |
| MSTRG. 14141. 9  | noncoding | -0. 0712704 | 3672  | 3903  | 4057  |
| MSTRG. 14141. 7  | noncoding | -0. 0315392 | 4449  | 4857  | 5012  |
| MSTRG. 14141. 11 | noncoding | -0. 0462848 | 624   | 765   | 2697  |
| MSTRG. 14142. 3  | coding    | 0. 264      | 1233  | 6726  | 13047 |
| MSTRG. 14142. 4  | coding    | 0. 266      | 885   | 6303  | 7598  |
| MSTRG. 14143. 1  | noncoding | -0. 0294912 | 6     | 87    | 431   |
| MSTRG. 14144. 2  | coding    | 0. 242      | 591   | 1230  | 2289  |
| MSTRG. 14147. 1  | noncoding | -0. 0237568 | 10977 | 11259 | 13995 |
| MSTRG. 14147. 2  | noncoding | -0. 0253952 | 2886  | 3084  | 4757  |
| MSTRG. 14153. 2  | coding    | 0. 267      | 117   | 660   | 1437  |
| MSTRG. 14153. 3  | coding    | 0. 284      | 60    | 639   | 1417  |
| MSTRG. 14157. 1  | noncoding | -0. 0004096 | 1752  | 1989  | 18927 |
| MSTRG. 14157. 2  | noncoding | -0. 043008  | 25308 | 25503 | 45615 |
| MSTRG. 14157. 4  | noncoding | -0. 043008  | 22764 | 22959 | 43449 |
| MSTRG. 14157. 3  | noncoding | -0. 043008  | 31071 | 31266 | 50292 |
| MSTRG. 14157. 5  | noncoding | -0. 043008  | 31326 | 31521 | 46747 |
| MSTRG. 14167. 1  | noncoding | -0. 028672  | 117   | 216   | 1278  |
| MSTRG. 14172. 1  | noncoding | -0. 049152  | 0     | 15    | 286   |
| MSTRG. 14177. 1  | noncoding | -0. 0004096 | 0     | 0     | 341   |
| MSTRG. 14182. 3  | coding    | 0. 028      | 414   | 567   | 1018  |
| MSTRG. 14183. 4  | noncoding | -0. 032768  | 1272  | 1362  | 2501  |
| MSTRG. 14183. 6  | noncoding | -0. 012288  | 69    | 183   | 2367  |
| MSTRG. 14183. 7  | noncoding | -0. 012288  | 579   | 714   | 2493  |
| MSTRG. 14183. 5  | noncoding | -0. 012288  | 579   | 714   | 1369  |
| MSTRG. 14183. 1  | coding    | 0. 091      | 1548  | 1761  | 2028  |
| MSTRG. 14183. 8  | coding    | 0. 091      | 1488  | 1701  | 1968  |
| MSTRG. 14186. 2  | coding    | 0. 203      | 534   | 1302  | 1794  |
| MSTRG. 14190. 2  | coding    | 0. 101      | 1500  | 4053  | 5941  |
| MSTRG. 14191. 1  | noncoding | -0. 045056  | 81    | 162   | 828   |
| MSTRG. 14192. 1  | noncoding | -0. 118784  | 117   | 183   | 337   |
| MSTRG. 14193. 1  | coding    | 0. 122      | 381   | 1545  | 3897  |
| MSTRG. 14193. 2  | noncoding | -0. 0581632 | 2784  | 2994  | 6207  |
| MSTRG. 14193. 3  | coding    | 0. 155      | 5274  | 7389  | 7556  |
| MSTRG. 14194. 3  | coding    | 0. 344      | 0     | 510   | 1570  |
| MSTRG. 14194. 2  | coding    | 0. 327      | 0     | 525   | 1445  |
| MSTRG. 14189. 2  | coding    | 0. 145      | 1773  | 5172  | 5609  |
| MSTRG. 14189. 3  | coding    | 0. 142      | 1650  | 5217  | 5753  |
| MSTRG. 14198. 1  | noncoding | -0. 0241664 | 6003  | 6255  | 12674 |
| MSTRG. 14198. 2  | noncoding | -0. 0708608 | 3555  | 3843  | 5207  |
| MSTRG. 14198. 3  | noncoding | -0. 0708608 | 2532  | 2820  | 6696  |
| MSTRG. 14198. 4  | noncoding | -0. 0708608 | 402   | 690   | 2098  |
| MSTRG. 14198. 5  | noncoding | -0. 0118784 | 702   | 852   | 3223  |
| MSTRG. 14199. 3  | coding    | 0. 05       | 0     | 273   | 478   |
| MSTRG. 14201. 4  | coding    | 0. 133      | 0     | 894   | 1359  |
| MSTRG. 14201. 5  | coding    | 0. 404      | 0     | 255   | 1639  |

|                  |           |             |       |       |       |
|------------------|-----------|-------------|-------|-------|-------|
| MSTRG. 14201. 3  | coding    | 0. 465      | 0     | 225   | 1752  |
| MSTRG. 14201. 8  | coding    | 0. 042      | 519   | 1119  | 1685  |
| MSTRG. 14201. 7  | coding    | 0. 042      | 519   | 1119  | 10677 |
| MSTRG. 14213. 1  | noncoding | -0. 110592  | 96    | 123   | 554   |
| MSTRG. 14219. 1  | noncoding | -0. 0909312 | 0     | 162   | 3894  |
| MSTRG. 14220. 2  | coding    | 0. 412      | 0     | 513   | 6195  |
| MSTRG. 14223. 1  | coding    | 0. 013      | 4884  | 5253  | 5656  |
| MSTRG. 14227. 1  | noncoding | -0. 036864  | 210   | 315   | 470   |
| MSTRG. 14221. 1  | coding    | 0. 293      | 330   | 1392  | 1850  |
| MSTRG. 14221. 2  | coding    | 0. 276      | 0     | 1104  | 1260  |
| MSTRG. 14221. 3  | coding    | 0. 297      | 579   | 1461  | 1615  |
| MSTRG. 14233. 2  | noncoding | -0. 0602112 | 255   | 435   | 656   |
| MSTRG. 14233. 3  | noncoding | -0. 0155648 | 246   | 408   | 629   |
| MSTRG. 14233. 1  | noncoding | -0. 012288  | 1521  | 1644  | 2196  |
| MSTRG. 14233. 4  | noncoding | -0. 0684032 | 258   | 429   | 615   |
| MSTRG. 14235. 1  | noncoding | -0. 0131072 | 0     | 57    | 517   |
| MSTRG. 14251. 3  | noncoding | -0. 0589824 | 471   | 672   | 1364  |
| MSTRG. 14251. 4  | noncoding | -0. 0090112 | 9048  | 9189  | 9358  |
| MSTRG. 14251. 5  | noncoding | -0. 036864  | 1128  | 1131  | 1834  |
| MSTRG. 14257. 1  | coding    | 0. 157      | 23169 | 23517 | 25364 |
| MSTRG. 14249. 6  | noncoding | -0. 110592  | 471   | 513   | 825   |
| MSTRG. 14249. 7  | noncoding | -0. 0057344 | 51    | 120   | 841   |
| MSTRG. 14249. 5  | noncoding | -0. 02048   | 717   | 846   | 1054  |
| MSTRG. 14249. 8  | noncoding | -0. 0057344 | 87    | 156   | 873   |
| MSTRG. 14248. 2  | coding    | 0. 256      | 36    | 270   | 4165  |
| MSTRG. 14266. 3  | coding    | 0. 049      | 2196  | 3336  | 3944  |
| MSTRG. 14269. 2  | noncoding | -0. 069632  | 4332  | 4908  | 5223  |
| MSTRG. 14269. 4  | noncoding | -0. 073728  | 627   | 708   | 2971  |
| MSTRG. 14272. 2  | coding    | 0. 033      | 153   | 1770  | 2936  |
| MSTRG. 14277. 1  | noncoding | -0. 0335872 | 1878  | 2454  | 2608  |
| MSTRG. 14278. 1  | noncoding | -0. 004096  | 1095  | 1203  | 3387  |
| MSTRG. 14287. 6  | coding    | 0. 122      | 150   | 3933  | 4502  |
| MSTRG. 14287. 7  | coding    | 0. 126      | 213   | 4029  | 4658  |
| MSTRG. 14287. 8  | coding    | 0. 121      | 213   | 3942  | 4571  |
| MSTRG. 14287. 10 | coding    | 0. 121      | 321   | 4050  | 4680  |
| MSTRG. 14287. 11 | coding    | 0. 121      | 774   | 4587  | 5216  |
| MSTRG. 14287. 12 | coding    | 0. 121      | 372   | 4101  | 4730  |
| MSTRG. 14287. 9  | coding    | 0. 121      | 546   | 4275  | 4904  |
| MSTRG. 14287. 13 | coding    | 0. 121      | 702   | 4515  | 5129  |
| MSTRG. 14288. 1  | noncoding | -0. 0155648 | 1701  | 1863  | 2144  |
| MSTRG. 14287. 14 | coding    | 0. 097      | 78    | 1734  | 2364  |
| MSTRG. 14280. 1  | noncoding | -0. 0004096 | 321   | 465   | 1774  |
| MSTRG. 14281. 1  | noncoding | -0. 004096  | 546   | 696   | 1162  |
| MSTRG. 14281. 3  | coding    | 0. 277      | 0     | 495   | 1064  |
| MSTRG. 14281. 4  | noncoding | -0. 004096  | 546   | 696   | 1171  |
| MSTRG. 14281. 5  | noncoding | -0. 024576  | 2214  | 2316  | 3737  |
| MSTRG. 14282. 1  | noncoding | -0. 016384  | 879   | 1038  | 15650 |
| MSTRG. 14282. 2  | noncoding | -0. 016384  | 879   | 1038  | 2515  |
| MSTRG. 14283. 1  | coding    | 0. 053      | 3396  | 3789  | 5451  |
| MSTRG. 14284. 1  | noncoding | -0. 0253952 | 1800  | 1977  | 6317  |
| MSTRG. 14285. 1  | noncoding | -0. 016384  | 144   | 228   | 1923  |
| MSTRG. 14290. 1  | coding    | 0. 081      | 165   | 348   | 5307  |
| MSTRG. 14290. 4  | noncoding | -0. 1253376 | 0     | 297   | 6505  |
| MSTRG. 14290. 5  | coding    | 0. 134      | 2163  | 2523  | 3039  |

|                  |           |             |      |       |       |
|------------------|-----------|-------------|------|-------|-------|
| MSTRG. 14290. 6  | noncoding | -0. 124928  | 0    | 300   | 2304  |
| MSTRG. 14290. 3  | coding    | 0. 134      | 2031 | 2391  | 2972  |
| MSTRG. 14290. 7  | coding    | 0. 134      | 2154 | 2514  | 3033  |
| MSTRG. 14291. 1  | noncoding | -0. 0221184 | 0    | 132   | 364   |
| MSTRG. 14304. 1  | noncoding | -0. 008192  | 48   | 210   | 426   |
| MSTRG. 14304. 2  | noncoding | -0. 0131072 | 234  | 399   | 615   |
| MSTRG. 14308. 1  | noncoding | -0. 055296  | 570  | 792   | 3005  |
| MSTRG. 14295. 1  | noncoding | -0. 0217088 | 2586 | 2772  | 4300  |
| MSTRG. 14296. 2  | coding    | 0. 221      | 384  | 2310  | 3109  |
| MSTRG. 14297. 1  | coding    | 0. 244      | 0    | 126   | 280   |
| MSTRG. 14298. 1  | noncoding | -0. 14336   | 51   | 60    | 458   |
| MSTRG. 14310. 2  | coding    | 0. 058      | 153  | 690   | 2276  |
| MSTRG. 14311. 1  | noncoding | -0. 0630784 | 3369 | 3756  | 4007  |
| MSTRG. 14311. 2  | noncoding | -0. 0053248 | 825  | 930   | 1084  |
| MSTRG. 14311. 3  | coding    | 0. 051      | 0    | 291   | 3777  |
| MSTRG. 14311. 4  | noncoding | -0. 043008  | 3303 | 3444  | 3601  |
| MSTRG. 14313. 2  | noncoding | -0. 0397312 | 2808 | 3024  | 6880  |
| MSTRG. 14317. 2  | coding    | 0. 443      | 0    | 219   | 609   |
| MSTRG. 14318. 2  | noncoding | -0. 012288  | 3666 | 3792  | 3950  |
| MSTRG. 14319. 1  | coding    | 0. 05       | 465  | 5013  | 5317  |
| MSTRG. 14319. 2  | coding    | 0. 045      | 156  | 5040  | 5301  |
| MSTRG. 14319. 4  | coding    | 0. 054      | 0    | 4428  | 4797  |
| MSTRG. 14319. 3  | coding    | 0. 044      | 633  | 5049  | 5310  |
| MSTRG. 14319. 12 | coding    | 0. 051      | 81   | 4134  | 4396  |
| MSTRG. 14319. 13 | coding    | 0. 07       | 495  | 2607  | 2845  |
| MSTRG. 14319. 14 | coding    | 0. 088      | 30   | 1806  | 2068  |
| MSTRG. 14320. 1  | noncoding | -0. 01024   | 123  | 207   | 1962  |
| MSTRG. 14324. 1  | noncoding | -0. 0217088 | 669  | 831   | 14426 |
| MSTRG. 14325. 1  | coding    | 0. 458      | 1635 | 3213  | 4783  |
| MSTRG. 14325. 2  | coding    | 0. 544      | 0    | 1113  | 2438  |
| MSTRG. 14326. 1  | noncoding | -0. 0004096 | 0    | 0     | 322   |
| MSTRG. 14330. 1  | noncoding | -0. 0303104 | 0    | 306   | 1057  |
| MSTRG. 14331. 1  | coding    | 0. 041      | 1368 | 2493  | 5992  |
| MSTRG. 14331. 3  | coding    | 0. 071      | 2625 | 2832  | 4301  |
| MSTRG. 14334. 2  | noncoding | -0. 059392  | 90   | 327   | 2813  |
| MSTRG. 14349. 2  | coding    | 0. 069      | 456  | 936   | 2733  |
| MSTRG. 14350. 1  | noncoding | -0. 0282624 | 0    | 270   | 2845  |
| MSTRG. 14354. 1  | noncoding | -0. 0319488 | 564  | 630   | 3991  |
| MSTRG. 14343. 1  | noncoding | -0. 1585152 | 0    | 849   | 2574  |
| MSTRG. 14359. 2  | coding    | 0. 054      | 387  | 2211  | 3999  |
| MSTRG. 14360. 2  | noncoding | -0. 0856064 | 0    | 120   | 1335  |
| MSTRG. 14367. 4  | coding    | 0. 069      | 6    | 1692  | 2031  |
| MSTRG. 14367. 5  | coding    | 0. 068      | 6    | 1695  | 1973  |
| MSTRG. 14368. 1  | noncoding | -0. 0004096 | 0    | 0     | 802   |
| MSTRG. 14369. 1  | noncoding | -0. 0126976 | 1569 | 1638  | 4955  |
| MSTRG. 14401. 1  | noncoding | -0. 0004096 | 390  | 390   | 631   |
| MSTRG. 14409. 7  | coding    | 0. 161      | 219  | 20850 | 21313 |
| MSTRG. 14409. 8  | coding    | 0. 162      | 207  | 20760 | 21225 |
| MSTRG. 14409. 9  | coding    | 0. 161      | 324  | 20955 | 21876 |
| MSTRG. 14409. 10 | noncoding | -0. 057344  | 1326 | 1410  | 3372  |
| MSTRG. 14409. 11 | coding    | 0. 17       | 279  | 17994 | 18914 |
| MSTRG. 14409. 12 | coding    | 0. 174      | 1506 | 17772 | 18692 |
| MSTRG. 14409. 13 | coding    | 0. 196      | 177  | 13554 | 14019 |
| MSTRG. 14409. 14 | coding    | 0. 196      | 174  | 13548 | 14466 |

|                 |           |             |      |      |      |
|-----------------|-----------|-------------|------|------|------|
| MSTRG. 14411. 3 | coding    | 0. 086      | 1584 | 3255 | 3485 |
| MSTRG. 14411. 4 | coding    | 0. 085      | 1578 | 3267 | 3497 |
| MSTRG. 14411. 5 | coding    | 0. 086      | 2145 | 3816 | 4047 |
| MSTRG. 14411. 6 | coding    | 0. 085      | 1584 | 3273 | 3502 |
| MSTRG. 14412. 1 | coding    | 0. 287      | 0    | 2730 | 3088 |
| MSTRG. 14376. 1 | coding    | 0. 122      | 891  | 1923 | 2350 |
| MSTRG. 14376. 2 | coding    | 0. 122      | 960  | 1992 | 6733 |
| MSTRG. 14379. 1 | noncoding | -0. 1798144 | 450  | 471  | 1308 |
| MSTRG. 14376. 3 | noncoding | -0. 0004096 | 0    | 0    | 332  |
| MSTRG. 14379. 2 | noncoding | -0. 0626688 | 0    | 129  | 3153 |
| MSTRG. 14380. 1 | coding    | 0. 685      | 204  | 1911 | 2066 |
| MSTRG. 14380. 2 | coding    | 0. 628      | 105  | 840  | 1562 |
| MSTRG. 14371. 4 | coding    | 0. 094      | 6    | 1002 | 1222 |
| MSTRG. 14385. 1 | noncoding | -0. 0180224 | 126  | 336  | 841  |
| MSTRG. 14386. 1 | noncoding | -0. 0434176 | 45   | 54   | 207  |
| MSTRG. 14387. 1 | noncoding | -0. 036864  | 0    | 108  | 490  |
| MSTRG. 14395. 1 | coding    | 0. 057      | 1107 | 1320 | 4927 |
| MSTRG. 14398. 1 | coding    | 0. 073      | 1044 | 1461 | 2245 |
| MSTRG. 14399. 1 | noncoding | -0. 012288  | 2469 | 2553 | 3945 |
| MSTRG. 14419. 1 | noncoding | -0. 0413696 | 2031 | 2070 | 5369 |
| MSTRG. 14421. 1 | noncoding | -0. 0159744 | 324  | 504  | 854  |
| MSTRG. 14422. 1 | coding    | 0. 125      | 0    | 165  | 1271 |
| MSTRG. 14424. 1 | noncoding | -0. 028672  | 204  | 333  | 677  |
| MSTRG. 14424. 2 | noncoding | -0. 028672  | 204  | 333  | 920  |
| MSTRG. 14426. 2 | noncoding | -0. 0892928 | 0    | 147  | 826  |
| MSTRG. 14426. 3 | noncoding | -0. 0888832 | 0    | 282  | 1217 |
| MSTRG. 14427. 3 | coding    | 0. 104      | 780  | 2589 | 5468 |
| MSTRG. 14427. 4 | coding    | 0. 119      | 414  | 2301 | 5179 |
| MSTRG. 14428. 1 | coding    | 0. 146      | 2982 | 3240 | 3854 |
| MSTRG. 14429. 1 | noncoding | -0. 0004096 | 159  | 261  | 804  |
| MSTRG. 14414. 1 | noncoding | -0. 028672  | 393  | 513  | 4151 |
| MSTRG. 14434. 1 | coding    | 0. 397      | 0    | 4218 | 6569 |
| MSTRG. 14435. 1 | coding    | 0. 365      | 0    | 519  | 1126 |
| MSTRG. 14436. 2 | noncoding | -0. 04096   | 237  | 312  | 518  |
| MSTRG. 14437. 1 | coding    | 0. 28       | 0    | 687  | 1877 |
| MSTRG. 14436. 4 | coding    | 0. 154      | 138  | 1200 | 1611 |
| MSTRG. 14437. 5 | coding    | 0. 28       | 0    | 687  | 1462 |
| MSTRG. 14439. 2 | coding    | 0. 173      | 12   | 933  | 2736 |
| MSTRG. 14439. 3 | coding    | 0. 173      | 12   | 933  | 2280 |
| MSTRG. 14454. 3 | coding    | 0. 303      | 165  | 6336 | 6492 |
| MSTRG. 14455. 1 | coding    | 0. 067      | 1644 | 2106 | 3540 |
| MSTRG. 14461. 1 | noncoding | -0. 0262144 | 1257 | 1287 | 2012 |
| MSTRG. 14440. 1 | coding    | 0. 02       | 48   | 198  | 414  |
| MSTRG. 14441. 2 | coding    | 0. 433      | 0    | 1044 | 2828 |
| MSTRG. 14442. 1 | coding    | 0. 578      | 33   | 2844 | 3001 |
| MSTRG. 14442. 3 | coding    | 0. 603      | 36   | 2643 | 3075 |
| MSTRG. 14442. 4 | coding    | 0. 603      | 117  | 2808 | 3239 |
| MSTRG. 14442. 5 | coding    | 0. 601      | 93   | 2715 | 3148 |
| MSTRG. 14442. 6 | coding    | 0. 604      | 174  | 2850 | 3282 |
| MSTRG. 14445. 2 | noncoding | -0. 159744  | 177  | 249  | 402  |
| MSTRG. 14445. 1 | noncoding | -0. 049152  | 312  | 465  | 894  |
| MSTRG. 14445. 3 | noncoding | -0. 1675264 | 0    | 159  | 477  |
| MSTRG. 14446. 1 | noncoding | -0. 0724992 | 0    | 132  | 650  |
| MSTRG. 14447. 1 | coding    | 0. 35       | 0    | 2889 | 4432 |



|                  |           |             |       |       |       |
|------------------|-----------|-------------|-------|-------|-------|
| MSTRG. 14448. 1  | noncoding | -0. 024576  | 3570  | 3615  | 5441  |
| MSTRG. 14453. 2  | coding    | 0. 313      | 3     | 2229  | 3957  |
| MSTRG. 14453. 4  | coding    | 0. 331      | 228   | 2292  | 3943  |
| MSTRG. 14453. 5  | coding    | 0. 322      | 0     | 1818  | 3527  |
| MSTRG. 14486. 1  | coding    | 0. 129      | 471   | 1050  | 4917  |
| MSTRG. 14486. 3  | coding    | 0. 129      | 429   | 1008  | 4875  |
| MSTRG. 14486. 4  | coding    | 0. 129      | 438   | 1017  | 4882  |
| MSTRG. 14487. 1  | coding    | 0. 647      | 366   | 2559  | 8511  |
| MSTRG. 14487. 2  | coding    | 0. 636      | 87    | 2424  | 8350  |
| MSTRG. 14488. 3  | noncoding | -0. 0004096 | 8991  | 9135  | 9289  |
| MSTRG. 14488. 5  | coding    | 0. 178      | 366   | 1800  | 5074  |
| MSTRG. 14491. 3  | noncoding | -0. 0421888 | 954   | 1155  | 2099  |
| MSTRG. 14491. 5  | noncoding | -0. 0421888 | 504   | 705   | 2617  |
| MSTRG. 14491. 8  | noncoding | -0. 0421888 | 504   | 705   | 2564  |
| MSTRG. 14491. 7  | noncoding | -0. 0733184 | 2325  | 2670  | 2824  |
| MSTRG. 14491. 10 | noncoding | -0. 0421888 | 20016 | 20217 | 21114 |
| MSTRG. 14491. 6  | noncoding | -0. 0421888 | 7017  | 7218  | 7990  |
| MSTRG. 14491. 4  | noncoding | -0. 0421888 | 1173  | 1374  | 2147  |
| MSTRG. 14491. 11 | noncoding | -0. 0421888 | 213   | 414   | 1186  |
| MSTRG. 14489. 1  | coding    | 0. 34       | 48    | 1236  | 1641  |
| MSTRG. 14489. 3  | coding    | 0. 35       | 207   | 1392  | 1795  |
| MSTRG. 14489. 4  | coding    | 0. 352      | 108   | 1296  | 3136  |
| MSTRG. 14492. 2  | noncoding | -0. 0421888 | 66    | 255   | 4294  |
| MSTRG. 14492. 3  | noncoding | -0. 0528384 | 3462  | 3639  | 8824  |
| MSTRG. 14492. 4  | noncoding | -0. 032768  | 2286  | 2400  | 2634  |
| MSTRG. 14493. 1  | noncoding | -0. 0106496 | 5838  | 5985  | 6843  |
| MSTRG. 14492. 6  | noncoding | -0. 0212992 | 216   | 339   | 839   |
| MSTRG. 14492. 5  | noncoding | -0. 028672  | 909   | 978   | 9320  |
| MSTRG. 14495. 1  | coding    | 0. 222      | 129   | 663   | 2648  |
| MSTRG. 14508. 5  | noncoding | -0. 2400256 | 0     | 132   | 4364  |
| MSTRG. 14508. 7  | coding    | 0. 208      | 450   | 2058  | 3758  |
| MSTRG. 14508. 8  | coding    | 0. 156      | 0     | 4224  | 4866  |
| MSTRG. 14508. 4  | coding    | 0. 233      | 0     | 2247  | 6299  |
| MSTRG. 14508. 6  | coding    | 0. 151      | 3153  | 6420  | 7922  |
| MSTRG. 14508. 9  | coding    | 0. 214      | 282   | 1995  | 3555  |
| MSTRG. 14509. 1  | noncoding | -0. 0212992 | 1710  | 1863  | 2599  |
| MSTRG. 14508. 10 | coding    | 0. 216      | 474   | 1962  | 3463  |
| MSTRG. 14513. 1  | noncoding | -0. 0118784 | 4140  | 4239  | 4460  |
| MSTRG. 14512. 3  | coding    | 0. 31       | 2103  | 7449  | 7666  |
| MSTRG. 14512. 4  | coding    | 0. 31       | 429   | 5775  | 5992  |
| MSTRG. 14515. 1  | noncoding | -0. 0192512 | 1662  | 1827  | 4293  |
| MSTRG. 14515. 2  | noncoding | -0. 069632  | 159   | 198   | 603   |
| MSTRG. 14515. 3  | noncoding | -0. 032768  | 156   | 219   | 2310  |
| MSTRG. 14516. 1  | noncoding | -0. 012288  | 312   | 483   | 778   |
| MSTRG. 14528. 1  | noncoding | -0. 0004096 | 8856  | 8991  | 9916  |
| MSTRG. 14528. 3  | noncoding | -0. 004096  | 300   | 438   | 3182  |
| MSTRG. 14528. 5  | noncoding | -0. 094208  | 27    | 111   | 1511  |
| MSTRG. 14529. 1  | noncoding | -0. 0659456 | 3201  | 3390  | 12243 |
| MSTRG. 14529. 2  | noncoding | -0. 02048   | 1422  | 1518  | 8271  |
| MSTRG. 14530. 1  | noncoding | -0. 0126976 | 687   | 840   | 11594 |
| MSTRG. 14529. 3  | noncoding | -0. 0004096 | 4143  | 4290  | 8467  |
| MSTRG. 14529. 4  | noncoding | -0. 04096   | 1365  | 1467  | 2712  |
| MSTRG. 14529. 5  | noncoding | -0. 098304  | 1302  | 1365  | 1519  |
| MSTRG. 14531. 1  | noncoding | -0. 012288  | 6186  | 6360  | 20672 |

|                |           |            |       |       |       |
|----------------|-----------|------------|-------|-------|-------|
| MSTRG.14531.2  | noncoding | -0.0069632 | 132   | 147   | 386   |
| MSTRG.14533.1  | noncoding | -0.069632  | 2313  | 2391  | 2795  |
| MSTRG.14534.1  | noncoding | -0.024576  | 23433 | 23598 | 58941 |
| MSTRG.14534.2  | noncoding | -0.004096  | 6465  | 6609  | 11168 |
| MSTRG.14534.3  | noncoding | -0.0106496 | 1374  | 1527  | 2065  |
| MSTRG.14534.4  | noncoding | -0.032768  | 4464  | 4581  | 5919  |
| MSTRG.14533.2  | noncoding | -0.028672  | 2136  | 2244  | 4796  |
| MSTRG.14535.1  | noncoding | -0.0008192 | 114   | 195   | 390   |
| MSTRG.14517.3  | coding    | 0.331      | 426   | 1473  | 3035  |
| MSTRG.14517.4  | coding    | 0.286      | 7257  | 7566  | 12112 |
| MSTRG.14518.1  | noncoding | -0.034816  | 0     | 99    | 1266  |
| MSTRG.14519.1  | noncoding | -0.1028096 | 0     | 66    | 247   |
| MSTRG.14526.3  | coding    | 0.315      | 627   | 2943  | 3609  |
| MSTRG.14536.1  | coding    | 0.145      | 0     | 165   | 1459  |
| MSTRG.14538.2  | coding    | 0.01       | 5304  | 5409  | 5968  |
| MSTRG.14538.3  | noncoding | -0.0557056 | 0     | 117   | 1144  |
| MSTRG.14538.4  | coding    | 0.135      | 4752  | 5508  | 7428  |
| MSTRG.14538.5  | coding    | 0.194      | 711   | 987   | 2350  |
| MSTRG.14539.5  | coding    | 0.196      | 381   | 1593  | 2979  |
| MSTRG.14539.7  | coding    | 0.19       | 231   | 1461  | 2210  |
| MSTRG.14540.1  | coding    | 0.235      | 282   | 1803  | 3726  |
| MSTRG.14540.11 | coding    | 0.25       | 1014  | 2388  | 3412  |
| MSTRG.14540.9  | coding    | 0.228      | 11616 | 13266 | 14290 |
| MSTRG.14540.12 | coding    | 0.216      | 126   | 1995  | 3020  |
| MSTRG.14540.13 | coding    | 0.223      | 189   | 1935  | 2960  |
| MSTRG.14540.10 | coding    | 0.223      | 732   | 2478  | 3503  |
| MSTRG.14540.4  | coding    | 0.221      | 378   | 2271  | 3296  |
| MSTRG.14540.3  | coding    | 0.223      | 234   | 1980  | 3005  |
| MSTRG.14540.6  | coding    | 0.223      | 231   | 1977  | 3001  |
| MSTRG.14540.7  | coding    | 0.238      | 4011  | 4863  | 5887  |
| MSTRG.14540.2  | coding    | 0.221      | 3351  | 5244  | 6268  |
| MSTRG.14540.8  | coding    | 0.221      | 3357  | 5250  | 6274  |
| MSTRG.14540.14 | noncoding | -0.028672  | 6141  | 6258  | 6450  |
| MSTRG.14541.1  | noncoding | -0.045056  | 900   | 927   | 1348  |
| MSTRG.14543.5  | coding    | 0.297      | 246   | 2922  | 3424  |
| MSTRG.14544.1  | coding    | 0.413      | 0     | 1893  | 2498  |
| MSTRG.14553.1  | coding    | 0.177      | 3     | 1977  | 5934  |
| MSTRG.14553.2  | coding    | 0.372      | 546   | 4275  | 6734  |
| MSTRG.14553.3  | coding    | 0.189      | 0     | 1896  | 3669  |
| MSTRG.14558.2  | coding    | 0.075      | 933   | 1380  | 2013  |
| MSTRG.14560.3  | coding    | 0.106      | 258   | 1173  | 2474  |
| MSTRG.14560.7  | noncoding | -0.08192   | 120   | 210   | 3460  |
| MSTRG.14563.6  | coding    | 0.217      | 1197  | 2445  | 6278  |
| MSTRG.14563.4  | coding    | 0.217      | 222   | 1470  | 5305  |
| MSTRG.14563.5  | coding    | 0.217      | 219   | 1467  | 5302  |
| MSTRG.14564.6  | noncoding | -0.057344  | 0     | 279   | 1803  |
| MSTRG.14564.4  | coding    | 0.122      | 453   | 1896  | 2885  |
| MSTRG.14564.5  | coding    | 0.096      | 441   | 1509  | 2685  |
| MSTRG.14564.2  | coding    | 0.099      | 441   | 1632  | 2745  |
| MSTRG.14565.1  | coding    | 0.215      | 258   | 1686  | 3277  |
| MSTRG.14564.7  | noncoding | -0.012288  | 138   | 189   | 346   |
| MSTRG.14564.8  | coding    | 0.095      | 357   | 1449  | 3097  |
| MSTRG.14565.2  | coding    | 0.234      | 0     | 1497  | 3297  |
| MSTRG.14566.4  | coding    | 0.138      | 2775  | 2991  | 5616  |

|                  |           |            |      |      |       |
|------------------|-----------|------------|------|------|-------|
| MSTRG. 14567. 1  | noncoding | -0.135168  | 114  | 204  | 12577 |
| MSTRG. 14568. 1  | coding    | 0.079      | 4041 | 4503 | 5680  |
| MSTRG. 14569. 1  | noncoding | -0.0221184 | 354  | 405  | 634   |
| MSTRG. 14556. 2  | noncoding | -0.0991232 | 0    | 204  | 947   |
| MSTRG. 14557. 1  | coding    | 0.373      | 42   | 5817 | 6683  |
| MSTRG. 14574. 4  | coding    | 0.256      | 276  | 2400 | 7166  |
| MSTRG. 14576. 2  | coding    | 0.105      | 30   | 447  | 638   |
| MSTRG. 14579. 4  | coding    | 0.184      | 0    | 6345 | 7209  |
| MSTRG. 14580. 1  | coding    | 0.276      | 42   | 1254 | 1937  |
| MSTRG. 14580. 3  | coding    | 0.3        | 276  | 1203 | 2639  |
| MSTRG. 14570. 2  | coding    | 0.462      | 0    | 756  | 1404  |
| MSTRG. 14573. 2  | noncoding | -0.0507904 | 0    | 300  | 1102  |
| MSTRG. 14583. 1  | coding    | 0.426      | 0    | 552  | 1611  |
| MSTRG. 14593. 1  | coding    | 0.275      | 117  | 1017 | 1682  |
| MSTRG. 14593. 3  | coding    | 0.306      | 330  | 1980 | 2643  |
| MSTRG. 14593. 4  | coding    | 0.304      | 330  | 1998 | 3804  |
| MSTRG. 14593. 5  | coding    | 0.277      | 327  | 1299 | 12577 |
| MSTRG. 14593. 7  | coding    | 0.292      | 8994 | 9681 | 10330 |
| MSTRG. 14600. 1  | coding    | 0.228      | 531  | 1371 | 1908  |
| MSTRG. 14600. 8  | coding    | 0.225      | 639  | 1497 | 2068  |
| MSTRG. 14600. 11 | coding    | 0.179      | 639  | 3948 | 4683  |
| MSTRG. 14600. 5  | coding    | 0.167      | 639  | 4080 | 4842  |
| MSTRG. 14600. 6  | coding    | 0.191      | 639  | 3588 | 4323  |
| MSTRG. 14600. 7  | coding    | 0.172      | 639  | 3987 | 4761  |
| MSTRG. 14600. 2  | coding    | 0.167      | 639  | 4083 | 4892  |
| MSTRG. 14600. 3  | coding    | 0.172      | 639  | 3984 | 4766  |
| MSTRG. 14600. 9  | coding    | 0.185      | 639  | 3684 | 4493  |
| MSTRG. 14600. 12 | coding    | 0.115      | 4299 | 6120 | 11975 |
| MSTRG. 14601. 1  | noncoding | -0.045056  | 141  | 192  | 806   |
| MSTRG. 14600. 13 | noncoding | -0.03072   | 2472 | 2913 | 3647  |
| MSTRG. 14600. 14 | noncoding | -0.0274432 | 1563 | 2103 | 2848  |
| MSTRG. 14603. 2  | coding    | 0.263      | 930  | 2160 | 3303  |
| MSTRG. 14605. 3  | noncoding | -0.0688128 | 2274 | 2550 | 2886  |
| MSTRG. 14605. 4  | noncoding | -0.0315392 | 885  | 1047 | 4031  |
| MSTRG. 14605. 2  | coding    | 0.272      | 528  | 1056 | 1210  |
| MSTRG. 14605. 5  | coding    | 0.353      | 6444 | 6765 | 6920  |
| MSTRG. 14591. 4  | coding    | 0.272      | 345  | 954  | 1483  |
| MSTRG. 14591. 5  | coding    | 0.266      | 0    | 1047 | 1460  |
| MSTRG. 14589. 1  | noncoding | -0.0098304 | 234  | 417  | 701   |
| MSTRG. 14590. 1  | noncoding | -0.008192  | 30   | 150  | 411   |
| MSTRG. 14592. 1  | coding    | 0.519      | 21   | 1521 | 2061  |
| MSTRG. 14592. 2  | coding    | 0.518      | 192  | 1713 | 2253  |
| MSTRG. 14608. 1  | coding    | 0.286      | 891  | 2256 | 8090  |
| MSTRG. 14608. 2  | coding    | 0.286      | 777  | 2142 | 7975  |
| MSTRG. 14608. 5  | coding    | 0.286      | 789  | 2154 | 4089  |
| MSTRG. 14608. 4  | coding    | 0.286      | 2115 | 3480 | 5415  |
| MSTRG. 14610. 1  | noncoding | -0.0229376 | 1680 | 1878 | 2742  |
| MSTRG. 14608. 7  | noncoding | -0.059392  | 2085 | 2481 | 5154  |
| MSTRG. 14612. 1  | coding    | 0.138      | 105  | 300  | 1006  |
| MSTRG. 14615. 1  | coding    | 0.229      | 3336 | 4293 | 7039  |
| MSTRG. 14615. 2  | coding    | 0.229      | 3657 | 4614 | 7361  |
| MSTRG. 14615. 3  | coding    | 0.151      | 0    | 1536 | 4282  |
| MSTRG. 14615. 5  | coding    | 0.229      | 1974 | 2931 | 5678  |
| MSTRG. 14619. 3  | coding    | 0.334      | 360  | 2763 | 3196  |

|                 |           |             |       |       |       |
|-----------------|-----------|-------------|-------|-------|-------|
| MSTRG. 14619. 2 | coding    | 0. 305      | 0     | 2736  | 3170  |
| MSTRG. 14619. 4 | coding    | 0. 336      | 366   | 2769  | 3202  |
| MSTRG. 14620. 1 | coding    | 0. 383      | 0     | 1044  | 1488  |
| MSTRG. 14620. 2 | coding    | 0. 393      | 0     | 990   | 1433  |
| MSTRG. 14620. 3 | coding    | 0. 295      | 0     | 1317  | 1762  |
| MSTRG. 14620. 4 | coding    | 0. 383      | 273   | 1044  | 1484  |
| MSTRG. 14620. 5 | noncoding | -0. 063488  | 165   | 672   | 993   |
| MSTRG. 14620. 6 | coding    | 0. 454      | 0     | 624   | 1055  |
| MSTRG. 14616. 3 | coding    | 0. 416      | 0     | 1164  | 8345  |
| MSTRG. 14624. 4 | coding    | 0. 303      | 138   | 1587  | 2686  |
| MSTRG. 14625. 3 | coding    | 0. 234      | 189   | 1230  | 1536  |
| MSTRG. 14629. 1 | coding    | 0. 24       | 0     | 1485  | 3277  |
| MSTRG. 14629. 3 | coding    | 0. 211      | 0     | 1731  | 2218  |
| MSTRG. 14626. 2 | coding    | 0. 413      | 156   | 1575  | 2039  |
| MSTRG. 14630. 1 | noncoding | -0. 0004096 | 108   | 195   | 649   |
| MSTRG. 14633. 1 | noncoding | -0. 086016  | 114   | 177   | 975   |
| MSTRG. 14638. 1 | noncoding | -0. 0151552 | 0     | 45    | 372   |
| MSTRG. 14645. 1 | coding    | 0. 237      | 471   | 3657  | 5163  |
| MSTRG. 14646. 1 | noncoding | -0. 0196608 | 852   | 1011  | 2073  |
| MSTRG. 14648. 2 | noncoding | -0. 0544768 | 9     | 255   | 937   |
| MSTRG. 14648. 3 | coding    | 0. 317      | 597   | 2364  | 2527  |
| MSTRG. 14651. 1 | coding    | 0. 137      | 357   | 1389  | 2910  |
| MSTRG. 14651. 3 | coding    | 0. 137      | 420   | 1452  | 4399  |
| MSTRG. 14651. 4 | coding    | 0. 145      | 438   | 1374  | 1695  |
| MSTRG. 14647. 1 | noncoding | -0. 053248  | 120   | 129   | 284   |
| MSTRG. 14658. 1 | noncoding | -0. 0847872 | 1161  | 1203  | 1916  |
| MSTRG. 14656. 1 | noncoding | -0. 14336   | 9     | 36    | 570   |
| MSTRG. 14672. 1 | coding    | 0. 058      | 3     | 204   | 359   |
| MSTRG. 14673. 1 | noncoding | -0. 073728  | 168   | 210   | 364   |
| MSTRG. 14675. 2 | coding    | 0. 032      | 1719  | 2322  | 5357  |
| MSTRG. 14678. 1 | noncoding | -0. 016384  | 291   | 375   | 849   |
| MSTRG. 14686. 1 | noncoding | -0. 06144   | 339   | 369   | 633   |
| MSTRG. 14687. 1 | noncoding | -0. 073728  | 291   | 333   | 1037  |
| MSTRG. 14687. 2 | noncoding | -0. 028672  | 240   | 291   | 1342  |
| MSTRG. 14688. 2 | coding    | 0. 35       | 1128  | 3099  | 8266  |
| MSTRG. 14692. 1 | noncoding | -0. 0303104 | 183   | 318   | 795   |
| MSTRG. 14692. 2 | noncoding | -0. 0663552 | 288   | 525   | 1002  |
| MSTRG. 14695. 1 | noncoding | -0. 0004096 | 390   | 558   | 758   |
| MSTRG. 14696. 5 | coding    | 0. 506      | 0     | 243   | 6654  |
| MSTRG. 14696. 6 | noncoding | -0. 1024    | 222   | 279   | 5272  |
| MSTRG. 14697. 1 | noncoding | -0. 012288  | 1161  | 1287  | 1440  |
| MSTRG. 14699. 2 | noncoding | -0. 0815104 | 18894 | 19530 | 19685 |
| MSTRG. 14699. 1 | noncoding | -0. 0692224 | 10068 | 11328 | 30953 |
| MSTRG. 14699. 3 | noncoding | -0. 0692224 | 11763 | 13023 | 27471 |
| MSTRG. 14699. 4 | noncoding | -0. 0692224 | 13845 | 15105 | 34020 |
| MSTRG. 14699. 5 | noncoding | -0. 0692224 | 12270 | 13530 | 32094 |
| MSTRG. 14699. 6 | noncoding | -0. 0868352 | 18810 | 19500 | 19654 |
| MSTRG. 14701. 8 | noncoding | -0. 0004096 | 687   | 852   | 1005  |
| MSTRG. 14701. 4 | coding    | 0. 076      | 0     | 1644  | 1911  |
| MSTRG. 14701. 5 | coding    | 0. 077      | 0     | 1572  | 1839  |
| MSTRG. 14701. 7 | coding    | 0. 081      | 0     | 1920  | 2187  |
| MSTRG. 14701. 9 | coding    | 0. 101      | 408   | 1227  | 1494  |
| MSTRG. 14702. 1 | coding    | 0. 39       | 69    | 3897  | 8441  |
| MSTRG. 14703. 1 | noncoding | -0. 0114688 | 1665  | 1788  | 5121  |

|                  |           |             |       |       |       |
|------------------|-----------|-------------|-------|-------|-------|
| MSTRG. 14707. 5  | coding    | 0. 175      | 0     | 1719  | 2155  |
| MSTRG. 14707. 4  | coding    | 0. 173      | 0     | 1722  | 3013  |
| MSTRG. 14707. 2  | coding    | 0. 173      | 0     | 1722  | 3144  |
| MSTRG. 14708. 2  | coding    | 0. 072      | 0     | 4635  | 13168 |
| MSTRG. 14708. 6  | coding    | 0. 086      | 339   | 1284  | 6512  |
| MSTRG. 14708. 7  | coding    | 0. 116      | 1101  | 1689  | 3935  |
| MSTRG. 14709. 1  | coding    | 0. 043      | 3012  | 3915  | 4068  |
| MSTRG. 14710. 1  | noncoding | -0. 02048   | 1284  | 1398  | 2482  |
| MSTRG. 14708. 9  | noncoding | -0. 135168  | 0     | 762   | 2459  |
| MSTRG. 14711. 1  | noncoding | -0. 0032768 | 2163  | 2235  | 4558  |
| MSTRG. 14708. 10 | noncoding | -0. 0401408 | 225   | 426   | 2320  |
| MSTRG. 14704. 2  | coding    | 0. 215      | 0     | 1446  | 2109  |
| MSTRG. 14704. 3  | coding    | 0. 179      | 195   | 1302  | 1965  |
| MSTRG. 14704. 4  | coding    | 0. 181      | 573   | 1947  | 2609  |
| MSTRG. 14706. 1  | noncoding | -0. 0004096 | 1095  | 1230  | 1678  |
| MSTRG. 14715. 1  | coding    | 0. 415      | 105   | 1428  | 7646  |
| MSTRG. 14715. 6  | coding    | 0. 405      | 249   | 1581  | 3021  |
| MSTRG. 14715. 7  | coding    | 0. 405      | 294   | 1626  | 3067  |
| MSTRG. 14715. 8  | coding    | 0. 405      | 384   | 1716  | 3155  |
| MSTRG. 14716. 1  | noncoding | -0. 0466944 | 438   | 567   | 1780  |
| MSTRG. 14717. 1  | noncoding | -0. 0647168 | 7896  | 8301  | 14685 |
| MSTRG. 14718. 1  | noncoding | -0. 0774144 | 417   | 795   | 1487  |
| MSTRG. 14719. 1  | noncoding | -0. 0221184 | 2094  | 2499  | 3967  |
| MSTRG. 14720. 1  | noncoding | -0. 0356352 | 4212  | 4776  | 5785  |
| MSTRG. 14721. 1  | noncoding | -0. 0401408 | 12522 | 12783 | 14929 |
| MSTRG. 14722. 1  | noncoding | -0. 0036864 | 3078  | 3225  | 4408  |
| MSTRG. 14723. 1  | noncoding | -0. 0692224 | 0     | 237   | 2156  |
| MSTRG. 14727. 1  | noncoding | -0. 0077824 | 432   | 606   | 1874  |
| MSTRG. 14727. 2  | noncoding | -0. 0233472 | 114   | 252   | 874   |
| MSTRG. 14730. 1  | noncoding | -0. 0114688 | 1377  | 1563  | 3175  |
| MSTRG. 14731. 2  | coding    | 0. 244      | 96    | 1917  | 2296  |
| MSTRG. 14734. 2  | coding    | 0. 479      | 81    | 1299  | 1636  |
| MSTRG. 14735. 2  | coding    | 0. 447      | 735   | 3657  | 4541  |
| MSTRG. 14735. 3  | coding    | 0. 413      | 168   | 3597  | 4480  |
| MSTRG. 14736. 1  | noncoding | -0. 0516096 | 99    | 744   | 2373  |
| MSTRG. 14745. 1  | noncoding | -0. 0258048 | 2358  | 2898  | 4225  |
| MSTRG. 14746. 1  | noncoding | -0. 0483328 | 1857  | 2214  | 2594  |
| MSTRG. 14748. 1  | noncoding | -0. 0540672 | 447   | 1179  | 1975  |
| MSTRG. 14749. 1  | noncoding | -0. 0405504 | 1587  | 2145  | 2301  |
| MSTRG. 14751. 1  | noncoding | -0. 0393216 | 0     | 300   | 3353  |
| MSTRG. 14750. 3  | coding    | 0. 402      | 351   | 1530  | 1920  |
| MSTRG. 14750. 2  | coding    | 0. 375      | 210   | 1797  | 2187  |
| MSTRG. 14750. 5  | coding    | 0. 341      | 327   | 1221  | 1377  |
| MSTRG. 14750. 4  | coding    | 0. 327      | 84    | 1386  | 1541  |
| MSTRG. 14750. 6  | noncoding | -0. 0954368 | 858   | 1209  | 1425  |
| MSTRG. 14753. 3  | coding    | 0. 36       | 0     | 408   | 6965  |
| MSTRG. 14754. 1  | noncoding | -0. 1552384 | 348   | 351   | 513   |
| MSTRG. 14753. 4  | coding    | 0. 515      | 0     | 135   | 2913  |
| MSTRG. 14769. 4  | coding    | 0. 069      | 534   | 5715  | 7215  |
| MSTRG. 14771. 1  | coding    | 0. 135      | 330   | 666   | 1584  |
| MSTRG. 14772. 1  | coding    | 0. 179      | 993   | 1878  | 2085  |
| MSTRG. 14772. 2  | coding    | 0. 175      | 699   | 1968  | 2176  |
| MSTRG. 14772. 4  | coding    | 0. 179      | 816   | 1701  | 1909  |
| MSTRG. 14773. 1  | noncoding | -0. 0258048 | 924   | 1038  | 4384  |

|               |           |            |      |      |       |
|---------------|-----------|------------|------|------|-------|
| MSTRG.14773.2 | noncoding | -0.0016384 | 741  | 882  | 6897  |
| MSTRG.14775.1 | noncoding | -0.090112  | 492  | 594  | 1412  |
| MSTRG.14777.1 | noncoding | -0.016384  | 6162 | 6222 | 6492  |
| MSTRG.14778.1 | noncoding | -0.008192  | 1263 | 1419 | 1872  |
| MSTRG.14780.2 | noncoding | -0.0561152 | 0    | 483  | 4929  |
| MSTRG.14780.3 | noncoding | -0.0598016 | 0    | 471  | 4747  |
| MSTRG.14782.6 | coding    | 0.115      | 441  | 1071 | 1653  |
| MSTRG.14785.4 | coding    | 0.155      | 0    | 558  | 874   |
| MSTRG.14785.5 | coding    | 0.104      | 0    | 555  | 873   |
| MSTRG.14787.1 | noncoding | -0.028672  | 147  | 264  | 834   |
| MSTRG.14789.4 | coding    | 0.126      | 0    | 3069 | 3393  |
| MSTRG.14790.3 | coding    | 0.152      | 0    | 1956 | 2175  |
| MSTRG.14790.4 | coding    | 0.167      | 117  | 1395 | 2171  |
| MSTRG.14791.2 | noncoding | -0.083968  | 0    | 126  | 545   |
| MSTRG.14792.2 | coding    | 0.35       | 0    | 288  | 869   |
| MSTRG.14793.2 | coding    | 0.184      | 144  | 1284 | 1530  |
| MSTRG.14796.1 | coding    | 0.476      | 0    | 909  | 1065  |
| MSTRG.14800.1 | coding    | 0.336      | 24   | 1092 | 1246  |
| MSTRG.14801.2 | coding    | 0.372      | 369  | 2796 | 3025  |
| MSTRG.14808.2 | coding    | 0.355      | 0    | 1890 | 3592  |
| MSTRG.14808.4 | coding    | 0.387      | 99   | 1731 | 3435  |
| MSTRG.14818.2 | coding    | 0.335      | 240  | 2814 | 5405  |
| MSTRG.14818.4 | coding    | 0.332      | 519  | 3093 | 4832  |
| MSTRG.14819.1 | coding    | 0.38       | 96   | 6192 | 6523  |
| MSTRG.14821.2 | coding    | 0.48       | 294  | 1305 | 3639  |
| MSTRG.14821.3 | coding    | 0.48       | 159  | 1170 | 3575  |
| MSTRG.14821.5 | coding    | 0.47       | 54   | 942  | 3293  |
| MSTRG.14814.1 | noncoding | -0.053248  | 117  | 159  | 315   |
| MSTRG.14815.3 | coding    | 0.34       | 189  | 2001 | 2448  |
| MSTRG.14827.1 | noncoding | -0.0446464 | 333  | 669  | 824   |
| MSTRG.14828.3 | coding    | 0.21       | 0    | 3630 | 4539  |
| MSTRG.14828.4 | coding    | 0.208      | 309  | 3693 | 4132  |
| MSTRG.14828.2 | coding    | 0.233      | 0    | 2559 | 4396  |
| MSTRG.14828.6 | coding    | 0.135      | 2739 | 3870 | 4907  |
| MSTRG.14830.5 | coding    | 0.553      | 657  | 2370 | 4000  |
| MSTRG.14835.1 | noncoding | -0.038912  | 1629 | 1785 | 2155  |
| MSTRG.14835.2 | noncoding | -0.0405504 | 0    | 498  | 7155  |
| MSTRG.14834.5 | noncoding | -0.0397312 | 978  | 1140 | 2827  |
| MSTRG.14840.1 | coding    | 0.119      | 1221 | 2178 | 9392  |
| MSTRG.14840.5 | coding    | 0.098      | 345  | 1809 | 2196  |
| MSTRG.14833.7 | coding    | 0.181      | 750  | 2697 | 3158  |
| MSTRG.14833.3 | coding    | 0.181      | 534  | 2481 | 2941  |
| MSTRG.14841.1 | coding    | 0.147      | 0    | 474  | 825   |
| MSTRG.14842.3 | noncoding | -0.0155648 | 198  | 372  | 934   |
| MSTRG.14842.2 | noncoding | -0.012288  | 570  | 720  | 903   |
| MSTRG.14842.1 | noncoding | -0.0045056 | 1029 | 1176 | 1691  |
| MSTRG.14842.5 | noncoding | -0.012288  | 462  | 612  | 876   |
| MSTRG.14844.2 | noncoding | -0.0536576 | 1359 | 1680 | 1834  |
| MSTRG.14846.1 | coding    | 0.181      | 0    | 3612 | 4440  |
| MSTRG.14846.3 | coding    | 0.178      | 0    | 3777 | 4223  |
| MSTRG.14849.1 | coding    | 0.367      | 0    | 3792 | 9106  |
| MSTRG.14849.2 | coding    | 0.365      | 0    | 3768 | 5082  |
| MSTRG.14849.3 | coding    | 0.337      | 72   | 4233 | 5544  |
| MSTRG.14852.1 | noncoding | -0.0053248 | 2271 | 2493 | 13698 |

|                 |           |             |      |      |       |
|-----------------|-----------|-------------|------|------|-------|
| MSTRG. 14852. 2 | noncoding | -0. 032768  | 318  | 453  | 5867  |
| MSTRG. 14853. 1 | noncoding | -0. 0147456 | 48   | 147  | 312   |
| MSTRG. 14852. 3 | noncoding | -0. 012288  | 351  | 471  | 1522  |
| MSTRG. 14854. 2 | noncoding | -0. 0110592 | 189  | 432  | 1374  |
| MSTRG. 14854. 1 | noncoding | -0. 0110592 | 189  | 432  | 1560  |
| MSTRG. 14854. 3 | noncoding | -0. 0339968 | 186  | 405  | 3461  |
| MSTRG. 14854. 4 | noncoding | -0. 0339968 | 186  | 405  | 3461  |
| MSTRG. 14854. 5 | noncoding | -0. 0339968 | 186  | 405  | 2200  |
| MSTRG. 14855. 1 | coding    | 0. 538      | 0    | 477  | 12426 |
| MSTRG. 14856. 1 | noncoding | -0. 0401408 | 0    | 42   | 424   |
| MSTRG. 14864. 1 | noncoding | -0. 004096  | 240  | 384  | 541   |
| MSTRG. 14866. 2 | coding    | 0. 17       | 0    | 1761 | 2620  |
| MSTRG. 14866. 3 | coding    | 0. 186      | 0    | 1734 | 2530  |
| MSTRG. 14867. 5 | noncoding | -0. 016384  | 1458 | 1488 | 2545  |
| MSTRG. 14867. 6 | coding    | 0. 455      | 0    | 495  | 9554  |
| MSTRG. 14865. 2 | coding    | 0. 202      | 0    | 837  | 1086  |
| MSTRG. 14869. 2 | coding    | 0. 367      | 0    | 3921 | 4760  |
| MSTRG. 14869. 5 | coding    | 0. 391      | 0    | 3402 | 4241  |
| MSTRG. 14869. 1 | coding    | 0. 368      | 0    | 3930 | 7323  |
| MSTRG. 14869. 3 | coding    | 0. 379      | 0    | 3738 | 7131  |
| MSTRG. 14868. 1 | coding    | 0. 217      | 651  | 1797 | 1962  |
| MSTRG. 14871. 2 | noncoding | -0. 0221184 | 975  | 1149 | 1666  |
| MSTRG. 14871. 1 | noncoding | -0. 0221184 | 975  | 1149 | 1700  |
| MSTRG. 14871. 3 | noncoding | -0. 0221184 | 93   | 267  | 992   |
| MSTRG. 14872. 2 | coding    | 0. 394      | 690  | 1572 | 2112  |
| MSTRG. 14872. 3 | coding    | 0. 238      | 192  | 1164 | 3364  |
| MSTRG. 14873. 2 | coding    | 0. 353      | 420  | 1521 | 3023  |
| MSTRG. 14873. 3 | coding    | 0. 356      | 0    | 1374 | 2771  |
| MSTRG. 14875. 1 | noncoding | -0. 012288  | 297  | 429  | 583   |
| MSTRG. 14883. 1 | noncoding | -0. 135168  | 816  | 873  | 1402  |
| MSTRG. 14884. 1 | coding    | 0. 042      | 1851 | 2580 | 3068  |
| MSTRG. 14885. 1 | noncoding | -0. 0036864 | 195  | 243  | 632   |
| MSTRG. 14877. 1 | noncoding | -0. 192512  | 78   | 132  | 425   |
| MSTRG. 14878. 1 | noncoding | -0. 0172032 | 837  | 981  | 1137  |
| MSTRG. 14890. 2 | coding    | 0. 132      | 0    | 651  | 2428  |
| MSTRG. 14892. 2 | noncoding | -0. 086016  | 45   | 102  | 535   |
| MSTRG. 14905. 1 | coding    | 0. 191      | 0    | 1275 | 1752  |
| MSTRG. 14907. 2 | noncoding | -0. 0741376 | 195  | 666  | 820   |
| MSTRG. 14909. 2 | coding    | 0. 19       | 0    | 903  | 1252  |
| MSTRG. 14909. 3 | noncoding | -0. 0704512 | 168  | 909  | 1256  |
| MSTRG. 14909. 4 | noncoding | -0. 049152  | 1266 | 1611 | 1766  |
| MSTRG. 14909. 5 | coding    | 0. 334      | 24   | 957  | 1174  |
| MSTRG. 14911. 1 | coding    | 0. 248      | 0    | 1197 | 1356  |
| MSTRG. 14913. 2 | coding    | 0. 439      | 78   | 4056 | 4447  |
| MSTRG. 14913. 3 | coding    | 0. 438      | 78   | 4077 | 4468  |
| MSTRG. 14921. 1 | noncoding | -0. 043008  | 2367 | 2550 | 3288  |
| MSTRG. 14920. 2 | coding    | 0. 39       | 396  | 1629 | 5415  |
| MSTRG. 14914. 2 | noncoding | -0. 1019904 | 0    | 162  | 1997  |
| MSTRG. 14915. 1 | coding    | 0. 189      | 0    | 153  | 471   |
| MSTRG. 14915. 3 | noncoding | -0. 038912  | 1860 | 2079 | 2396  |
| MSTRG. 14915. 4 | noncoding | -0. 0172032 | 834  | 1008 | 1327  |
| MSTRG. 14930. 4 | coding    | 0. 14       | 51   | 603  | 946   |
| MSTRG. 14930. 5 | noncoding | -0. 0356352 | 4077 | 4371 | 4714  |
| MSTRG. 14930. 6 | noncoding | -0. 0393216 | 120  | 426  | 775   |

|                 |           |             |      |       |       |
|-----------------|-----------|-------------|------|-------|-------|
| MSTRG. 14931. 1 | noncoding | -0. 0073728 | 2304 | 2448  | 3457  |
| MSTRG. 14932. 1 | noncoding | -0. 0151552 | 1164 | 1347  | 3170  |
| MSTRG. 14933. 1 | noncoding | -0. 0208896 | 156  | 657   | 812   |
| MSTRG. 14933. 2 | noncoding | -0. 0438272 | 156  | 747   | 902   |
| MSTRG. 14939. 1 | noncoding | -0. 028672  | 87   | 345   | 591   |
| MSTRG. 14940. 2 | coding    | 0. 182      | 303  | 2022  | 2279  |
| MSTRG. 14944. 1 | coding    | 0. 088      | 306  | 1134  | 2145  |
| MSTRG. 14945. 1 | coding    | 0. 051      | 0    | 10803 | 11997 |
| MSTRG. 14945. 5 | coding    | 0. 047      | 0    | 11166 | 11551 |
| MSTRG. 14945. 6 | coding    | 0. 119      | 6798 | 9612  | 9953  |
| MSTRG. 14946. 1 | noncoding | -0. 0180224 | 255  | 396   | 1374  |
| MSTRG. 14947. 1 | noncoding | -0. 0188416 | 1671 | 1773  | 3467  |
| MSTRG. 14945. 7 | coding    | 0. 039      | 0    | 10005 | 16241 |
| MSTRG. 14948. 1 | noncoding | -0. 0004096 | 0    | 0     | 2904  |
| MSTRG. 14945. 8 | coding    | 0. 022      | 270  | 4956  | 7353  |
| MSTRG. 14945. 9 | coding    | 0. 04       | 0    | 6450  | 7532  |
| MSTRG. 14942. 2 | coding    | 0. 338      | 162  | 642   | 1163  |
| MSTRG. 14942. 3 | coding    | 0. 277      | 21   | 672   | 1192  |
| MSTRG. 14942. 6 | coding    | 0. 335      | 969  | 1479  | 1998  |
| MSTRG. 14942. 5 | coding    | 0. 341      | 0    | 735   | 1025  |
| MSTRG. 14942. 4 | coding    | 0. 249      | 21   | 759   | 4599  |
| MSTRG. 14958. 1 | noncoding | -0. 077824  | 594  | 675   | 948   |
| MSTRG. 14957. 2 | coding    | 0. 222      | 87   | 1053  | 4368  |
| MSTRG. 14959. 1 | noncoding | -0. 0028672 | 531  | 612   | 1848  |
| MSTRG. 14962. 2 | coding    | 0. 583      | 1917 | 3084  | 5774  |
| MSTRG. 14960. 1 | noncoding | -0. 0139264 | 171  | 180   | 336   |
| MSTRG. 14965. 4 | coding    | 0. 379      | 3771 | 5526  | 5831  |
| MSTRG. 14965. 3 | coding    | 0. 495      | 114  | 3132  | 5266  |
| MSTRG. 14965. 1 | coding    | 0. 471      | 0    | 4611  | 6724  |
| MSTRG. 14965. 2 | coding    | 0. 47       | 930  | 5439  | 7551  |
| MSTRG. 14965. 5 | coding    | 0. 472      | 0    | 4563  | 6676  |
| MSTRG. 14966. 1 | noncoding | -0. 04096   | 1908 | 2607  | 8481  |
| MSTRG. 14968. 7 | coding    | 0. 103      | 6489 | 10428 | 10701 |
| MSTRG. 14968. 4 | coding    | 0. 105      | 615  | 4530  | 4927  |
| MSTRG. 14968. 5 | coding    | 0. 105      | 627  | 4542  | 4937  |
| MSTRG. 14968. 8 | coding    | 0. 105      | 2268 | 6183  | 6580  |
| MSTRG. 14969. 1 | noncoding | -0. 004096  | 1062 | 1089  | 1312  |
| MSTRG. 14970. 1 | noncoding | -0. 0729088 | 120  | 351   | 506   |
| MSTRG. 14975. 1 | noncoding | -0. 0868352 | 0    | 60    | 649   |
| MSTRG. 14986. 2 | noncoding | -0. 083968  | 879  | 1119  | 2547  |
| MSTRG. 14986. 3 | coding    | 0. 237      | 0    | 726   | 2155  |
| MSTRG. 14987. 2 | coding    | 0. 333      | 0    | 3975  | 4611  |
| MSTRG. 14989. 1 | coding    | 0. 111      | 0    | 960   | 1896  |
| MSTRG. 14989. 2 | noncoding | -0. 0610304 | 1335 | 1818  | 1974  |
| MSTRG. 14989. 3 | noncoding | -0. 0581632 | 1224 | 1683  | 1837  |
| MSTRG. 14990. 1 | noncoding | -0. 1060864 | 669  | 1629  | 1783  |
| MSTRG. 14992. 2 | noncoding | -0. 1163264 | 57   | 756   | 2248  |
| MSTRG. 15000. 1 | noncoding | -0. 098304  | 444  | 516   | 674   |
| MSTRG. 15001. 1 | noncoding | -0. 0258048 | 783  | 918   | 2500  |
| MSTRG. 15007. 4 | coding    | 0. 024      | 0    | 13104 | 13518 |
| MSTRG. 15007. 5 | coding    | 0. 026      | 0    | 13209 | 13363 |
| MSTRG. 15007. 7 | coding    | 0. 037      | 1485 | 1740  | 3745  |
| MSTRG. 15007. 8 | coding    | 0. 015      | 3258 | 9360  | 9776  |
| MSTRG. 14997. 1 | noncoding | -0. 1499136 | 0    | 24    | 226   |



|               |           |             |      |      |       |
|---------------|-----------|-------------|------|------|-------|
| MSTRG.14998.1 | noncoding | -0.0004096  | 858  | 858  | 1079  |
| MSTRG.15017.1 | noncoding | -0.016384   | 87   | 111  | 1143  |
| MSTRG.15018.1 | noncoding | -0.0282624  | 552  | 633  | 4151  |
| MSTRG.15021.1 | coding    | 0.175       | 0    | 2148 | 13004 |
| MSTRG.15021.4 | coding    | 0.127       | 1092 | 3039 | 6044  |
| MSTRG.15022.1 | noncoding | -0.098304   | 1389 | 1422 | 1812  |
| MSTRG.15023.4 | coding    | 0.031       | 732  | 1170 | 2468  |
| MSTRG.15023.5 | coding    | 0.031       | 720  | 1158 | 2154  |
| MSTRG.15033.1 | coding    | 0.061       | 939  | 3393 | 4243  |
| MSTRG.15033.2 | coding    | 0.061       | 1230 | 3684 | 4336  |
| MSTRG.15033.5 | coding    | 0.061       | 1401 | 3855 | 4086  |
| MSTRG.15026.1 | noncoding | -0.53294177 | 207  | 249  | 580   |
| MSTRG.15028.1 | noncoding | -0.004096   | 162  | 435  | 1938  |
| MSTRG.15038.2 | noncoding | -0.1339392  | 0    | 225  | 669   |
| MSTRG.15046.1 | coding    | 0.369       | 0    | 717  | 2180  |
| MSTRG.15046.4 | coding    | 0.369       | 0    | 717  | 2946  |
| MSTRG.15046.5 | coding    | 0.504       | 0    | 408  | 2403  |
| MSTRG.15046.6 | coding    | 0.504       | 0    | 408  | 2551  |
| MSTRG.15046.7 | coding    | 0.098       | 738  | 1065 | 2263  |
| MSTRG.15047.1 | noncoding | -0.0557056  | 0    | 1122 | 6794  |
| MSTRG.15047.2 | noncoding | -0.0294912  | 552  | 861  | 5812  |
| MSTRG.15046.9 | noncoding | -0.0258048  | 3306 | 3375 | 4736  |
| MSTRG.15050.6 | noncoding | -0.0352256  | 234  | 492  | 1500  |
| MSTRG.15050.2 | noncoding | -0.0331776  | 234  | 501  | 1517  |
| MSTRG.15050.4 | noncoding | -0.0282624  | 234  | 498  | 1175  |
| MSTRG.15050.7 | noncoding | -0.0479232  | 234  | 477  | 1727  |
| MSTRG.15051.1 | coding    | 0.04        | 2157 | 2286 | 2439  |
| MSTRG.15051.2 | coding    | 0.201       | 2559 | 2931 | 9590  |
| MSTRG.15051.3 | coding    | 0.237       | 2361 | 2751 | 3208  |
| MSTRG.15051.4 | coding    | 0.201       | 2553 | 2925 | 3381  |
| MSTRG.15052.2 | noncoding | -0.098304   | 183  | 189  | 448   |
| MSTRG.15054.1 | coding    | 0.231       | 0    | 204  | 687   |
| MSTRG.15043.1 | noncoding | -0.04096    | 348  | 408  | 1763  |
| MSTRG.15039.1 | noncoding | -0.036864   | 0    | 15   | 274   |
| MSTRG.15055.2 | coding    | 0.083       | 0    | 1299 | 8891  |
| MSTRG.15055.4 | coding    | 0.058       | 435  | 906  | 5129  |
| MSTRG.15055.6 | coding    | 0.049       | 576  | 1464 | 4326  |
| MSTRG.15055.7 | coding    | 0.037       | 495  | 1320 | 3679  |
| MSTRG.15055.8 | coding    | 0.049       | 630  | 1518 | 3060  |
| MSTRG.15057.1 | noncoding | -0.0004096  | 150  | 258  | 635   |
| MSTRG.15058.1 | noncoding | -0.0172032  | 390  | 576  | 731   |
| MSTRG.15045.1 | noncoding | -0.124928   | 330  | 333  | 700   |
| MSTRG.15068.1 | noncoding | -0.0712704  | 48   | 81   | 237   |
| MSTRG.15072.1 | noncoding | -0.004096   | 162  | 249  | 403   |
| MSTRG.15072.2 | noncoding | -0.008192   | 246  | 303  | 468   |
| MSTRG.15080.1 | noncoding | -0.0569344  | 1299 | 1422 | 3362  |
| MSTRG.15083.4 | coding    | 0.082       | 0    | 3033 | 3643  |
| MSTRG.15083.3 | coding    | 0.074       | 0    | 3174 | 4264  |
| MSTRG.15083.5 | noncoding | -0.1032192  | 0    | 429  | 3241  |
| MSTRG.15084.1 | noncoding | -0.008192   | 735  | 843  | 3290  |
| MSTRG.15085.1 | noncoding | -0.012288   | 153  | 288  | 878   |
| MSTRG.15090.1 | coding    | 0.453       | 0    | 1290 | 2720  |
| MSTRG.15090.2 | coding    | 0.709       | 0    | 675  | 17513 |
| MSTRG.15091.1 | noncoding | -0.0024576  | 804  | 942  | 2250  |

|                  |           |             |       |       |       |
|------------------|-----------|-------------|-------|-------|-------|
| MSTRG. 15092. 1  | noncoding | -0. 008192  | 669   | 753   | 1958  |
| MSTRG. 15093. 10 | coding    | 0. 09       | 0     | 1356  | 4967  |
| MSTRG. 15093. 9  | coding    | 0. 083      | 0     | 1632  | 5353  |
| MSTRG. 15093. 11 | coding    | 0. 059      | 570   | 1950  | 2192  |
| MSTRG. 15093. 12 | coding    | 0. 062      | 219   | 1599  | 1840  |
| MSTRG. 15097. 3  | coding    | 0. 105      | 2508  | 3366  | 5919  |
| MSTRG. 15097. 4  | noncoding | -0. 077824  | 1893  | 1962  | 2115  |
| MSTRG. 15100. 2  | coding    | 0. 079      | 6     | 2730  | 6492  |
| MSTRG. 15105. 1  | coding    | 0. 125      | 450   | 1863  | 6746  |
| MSTRG. 15105. 2  | coding    | 0. 117      | 201   | 1257  | 3127  |
| MSTRG. 15105. 5  | coding    | 0. 087      | 267   | 1191  | 4445  |
| MSTRG. 15105. 3  | coding    | 0. 126      | 186   | 1875  | 10841 |
| MSTRG. 15105. 4  | coding    | 0. 119      | 186   | 1719  | 6437  |
| MSTRG. 15105. 6  | coding    | 0. 121      | 0     | 1287  | 2499  |
| MSTRG. 15105. 8  | coding    | 0. 113      | 5148  | 6456  | 6933  |
| MSTRG. 15105. 9  | noncoding | -0. 077824  | 3546  | 3612  | 7848  |
| MSTRG. 15106. 1  | noncoding | -0. 069632  | 9378  | 9510  | 10859 |
| MSTRG. 15106. 2  | noncoding | -0. 0208896 | 5553  | 5709  | 8542  |
| MSTRG. 15106. 3  | noncoding | -0. 0200704 | 1356  | 1512  | 3626  |
| MSTRG. 15107. 1  | coding    | 0. 146      | 417   | 1788  | 6926  |
| MSTRG. 15108. 1  | coding    | 0. 065      | 0     | 519   | 1574  |
| MSTRG. 15108. 2  | coding    | 0. 089      | 0     | 675   | 1480  |
| MSTRG. 15109. 1  | noncoding | -0. 1396736 | 0     | 66    | 222   |
| MSTRG. 15109. 2  | noncoding | -0. 0987136 | 0     | 168   | 322   |
| MSTRG. 15105. 11 | noncoding | -0. 008192  | 1683  | 1728  | 2225  |
| MSTRG. 15124. 5  | coding    | 0. 118      | 141   | 1770  | 4675  |
| MSTRG. 15126. 1  | noncoding | -0. 0659456 | 411   | 510   | 898   |
| MSTRG. 15127. 5  | noncoding | -0. 13312   | 0     | 84    | 803   |
| MSTRG. 15127. 4  | noncoding | -0. 13312   | 0     | 84    | 3620  |
| MSTRG. 15127. 3  | noncoding | -0. 0045056 | 4248  | 4404  | 13780 |
| MSTRG. 15127. 1  | coding    | 0. 103      | 22527 | 22818 | 23661 |
| MSTRG. 15129. 1  | noncoding | -0. 233472  | 2316  | 2373  | 2971  |
| MSTRG. 15131. 1  | noncoding | -0. 024576  | 1251  | 1299  | 7208  |
| MSTRG. 15132. 1  | coding    | 0. 007      | 1185  | 1314  | 3050  |
| MSTRG. 15118. 3  | coding    | 0. 057      | 174   | 867   | 1548  |
| MSTRG. 15119. 1  | noncoding | -0. 172032  | 36    | 60    | 290   |
| MSTRG. 15141. 1  | noncoding | -0. 0364544 | 375   | 540   | 6694  |
| MSTRG. 15141. 2  | coding    | 0. 369      | 273   | 3105  | 5737  |
| MSTRG. 15141. 4  | coding    | 0. 389      | 783   | 2760  | 4945  |
| MSTRG. 15138. 1  | noncoding | -0. 0053248 | 1476  | 1650  | 1887  |
| MSTRG. 15138. 2  | noncoding | -0. 073728  | 99    | 126   | 1284  |
| MSTRG. 15145. 1  | coding    | 0. 302      | 0     | 693   | 3875  |
| MSTRG. 15146. 4  | noncoding | -0. 06144   | 189   | 243   | 5788  |
| MSTRG. 15146. 5  | noncoding | -0. 008192  | 69    | 201   | 1914  |
| MSTRG. 15146. 6  | noncoding | -0. 008192  | 69    | 201   | 1297  |
| MSTRG. 15146. 7  | noncoding | -0. 0114688 | 69    | 249   | 1154  |
| MSTRG. 15146. 10 | noncoding | -0. 2179072 | 126   | 138   | 733   |
| MSTRG. 15146. 13 | noncoding | -0. 008192  | 42    | 174   | 1645  |
| MSTRG. 15146. 11 | noncoding | -0. 045056  | 6     | 279   | 1001  |
| MSTRG. 15146. 15 | noncoding | -0. 008192  | 69    | 201   | 1462  |
| MSTRG. 15146. 8  | noncoding | -0. 008192  | 69    | 201   | 1678  |
| MSTRG. 15146. 14 | noncoding | -0. 2179072 | 126   | 138   | 755   |
| MSTRG. 15146. 12 | noncoding | -0. 2179072 | 126   | 138   | 758   |
| MSTRG. 15147. 2  | noncoding | -0. 147456  | 939   | 951   | 1292  |

|                 |           |            |       |       |       |
|-----------------|-----------|------------|-------|-------|-------|
| MSTRG. 15149.1  | coding    | 0.103      | 1317  | 1935  | 4899  |
| MSTRG. 15151.1  | coding    | 0.098      | 564   | 783   | 1019  |
| MSTRG. 15152.1  | coding    | 0.122      | 927   | 1278  | 1501  |
| MSTRG. 15143.1  | noncoding | -0.045056  | 336   | 519   | 1047  |
| MSTRG. 15156.3  | coding    | 0.533      | 0     | 1932  | 2164  |
| MSTRG. 15156.4  | coding    | 0.422      | 468   | 1164  | 3230  |
| MSTRG. 15153.1  | coding    | 0.178      | 0     | 1254  | 1824  |
| MSTRG. 15153.2  | coding    | 0.197      | 0     | 1119  | 1540  |
| MSTRG. 15167.2  | coding    | 0.395      | 0     | 207   | 1059  |
| MSTRG. 15174.3  | noncoding | -0.2248704 | 3837  | 4119  | 4973  |
| MSTRG. 15175.1  | noncoding | -0.049152  | 3057  | 3132  | 3384  |
| MSTRG. 15176.1  | noncoding | -0.0069632 | 111   | 261   | 2558  |
| MSTRG. 15174.4  | noncoding | -0.0004096 | 12384 | 12486 | 14199 |
| MSTRG. 15174.5  | coding    | 0.117      | 1083  | 1413  | 13283 |
| MSTRG. 15177.1  | noncoding | -0.0004096 | 0     | 0     | 2083  |
| MSTRG. 15181.1  | coding    | 0.23       | 0     | 2358  | 7800  |
| MSTRG. 15181.5  | noncoding | -0.0299008 | 0     | 231   | 3333  |
| MSTRG. 15183.2  | coding    | 0.171      | 282   | 645   | 886   |
| MSTRG. 15184.1  | coding    | 0.197      | 0     | 780   | 1996  |
| MSTRG. 15184.2  | coding    | 0.131      | 480   | 1713  | 3413  |
| MSTRG. 15185.1  | noncoding | -0.0004096 | 6024  | 6138  | 6646  |
| MSTRG. 15184.3  | coding    | 0.168      | 0     | 1758  | 2602  |
| MSTRG. 15184.5  | coding    | 0.205      | 0     | 741   | 2028  |
| MSTRG. 15184.9  | coding    | 0.254      | 0     | 276   | 768   |
| MSTRG. 15184.10 | noncoding | -0.0385024 | 10725 | 11262 | 11418 |
| MSTRG. 15188.1  | noncoding | -0.0606208 | 15    | 48    | 1409  |
| MSTRG. 15188.2  | noncoding | -0.0004096 | 1251  | 1404  | 1557  |
| MSTRG. 15190.1  | coding    | 0.257      | 57    | 1650  | 3920  |
| MSTRG. 15190.6  | coding    | 0.246      | 57    | 396   | 3421  |
| MSTRG. 15191.1  | noncoding | -0.02048   | 4497  | 4605  | 7421  |
| MSTRG. 15192.1  | noncoding | -0.028672  | 6744  | 6855  | 13063 |
| MSTRG. 15194.1  | noncoding | -0.034816  | 12909 | 13203 | 14302 |
| MSTRG. 15219.1  | coding    | 0.297      | 495   | 5025  | 8178  |
| MSTRG. 15219.2  | coding    | 0.289      | 234   | 1143  | 4185  |
| MSTRG. 15219.3  | coding    | 0.309      | 0     | 4410  | 7295  |
| MSTRG. 15220.1  | noncoding | -0.012288  | 0     | 78    | 240   |
| MSTRG. 15221.1  | noncoding | -0.0012288 | 0     | 3     | 202   |
| MSTRG. 15227.1  | noncoding | -0.04096   | 690   | 729   | 2725  |
| MSTRG. 15253.1  | noncoding | -0.151552  | 1434  | 1443  | 1599  |
| MSTRG. 15197.1  | noncoding | -0.045056  | 30    | 54    | 209   |
| MSTRG. 15199.1  | coding    | 0.224      | 0     | 156   | 416   |
| MSTRG. 15209.3  | coding    | 0.053      | 0     | 1170  | 3046  |
| MSTRG. 15210.1  | noncoding | -0.0475136 | 8259  | 8442  | 9596  |
| MSTRG. 15210.2  | noncoding | -0.0004096 | 930   | 1071  | 2612  |
| MSTRG. 15209.4  | noncoding | -0.0622592 | 0     | 102   | 621   |
| MSTRG. 15212.1  | noncoding | -0.1417216 | 0     | 12    | 231   |
| MSTRG. 15213.2  | noncoding | -0.0835584 | 0     | 207   | 417   |
| MSTRG. 15268.1  | coding    | 0.058      | 471   | 630   | 922   |
| MSTRG. 15268.2  | noncoding | -0.045056  | 471   | 585   | 923   |
| MSTRG. 15284.1  | coding    | 0.122      | 1242  | 1497  | 1933  |
| MSTRG. 15287.5  | coding    | 0.485      | 0     | 7962  | 9132  |
| MSTRG. 15287.6  | coding    | 0.522      | 2994  | 10155 | 11326 |
| MSTRG. 15291.1  | coding    | 0.314      | 363   | 1227  | 1586  |
| MSTRG. 15296.3  | noncoding | -0.012288  | 2322  | 2424  | 2772  |

|                 |           |             |      |      |       |
|-----------------|-----------|-------------|------|------|-------|
| MSTRG. 15302. 2 | coding    | 0. 073      | 381  | 5346 | 8977  |
| MSTRG. 15312. 1 | noncoding | -0. 0487424 | 2592 | 2769 | 8711  |
| MSTRG. 15304. 1 | noncoding | -0. 004096  | 582  | 651  | 1395  |
| MSTRG. 15328. 2 | noncoding | -0. 012288  | 363  | 432  | 947   |
| MSTRG. 15333. 1 | noncoding | -0. 0802816 | 60   | 75   | 658   |
| MSTRG. 15338. 1 | noncoding | -0. 077824  | 219  | 309  | 922   |
| MSTRG. 15347. 1 | coding    | 0. 033      | 453  | 963  | 9644  |
| MSTRG. 15353. 1 | coding    | 0. 041      | 627  | 1017 | 2313  |
| MSTRG. 15359. 2 | coding    | 0. 132      | 1533 | 2265 | 4802  |
| MSTRG. 15360. 1 | noncoding | -0. 069632  | 6075 | 6186 | 15509 |
| MSTRG. 15360. 2 | coding    | 0. 086      | 165  | 342  | 497   |
| MSTRG. 15362. 1 | noncoding | -0. 049152  | 2733 | 2826 | 3175  |
| MSTRG. 15357. 1 | noncoding | -0. 0712704 | 102  | 381  | 610   |
| MSTRG. 15368. 2 | coding    | 0. 281      | 0    | 1512 | 1992  |
| MSTRG. 15368. 3 | coding    | 0. 293      | 0    | 1401 | 1815  |
| MSTRG. 15375. 2 | coding    | 0. 137      | 0    | 9030 | 10062 |
| MSTRG. 15379. 2 | coding    | 0. 37       | 207  | 2313 | 4215  |
| MSTRG. 15381. 1 | coding    | 0. 276      | 51   | 402  | 652   |
| MSTRG. 15381. 2 | coding    | 0. 458      | 0    | 453  | 700   |
| MSTRG. 15381. 3 | coding    | 0. 359      | 0    | 483  | 728   |
| MSTRG. 15380. 1 | noncoding | -0. 0167936 | 306  | 480  | 990   |
| MSTRG. 15380. 2 | noncoding | -0. 032768  | 543  | 636  | 851   |
| MSTRG. 15383. 1 | noncoding | -0. 098304  | 225  | 276  | 431   |
| MSTRG. 15386. 3 | coding    | 0. 369      | 249  | 1092 | 1384  |
| MSTRG. 15386. 5 | coding    | 0. 344      | 6519 | 7650 | 7941  |
| MSTRG. 15394. 2 | noncoding | -0. 0651264 | 45   | 312  | 599   |
| MSTRG. 15394. 1 | noncoding | -0. 073728  | 45   | 342  | 2656  |
| MSTRG. 15399. 1 | noncoding | -0. 077824  | 405  | 468  | 706   |
| MSTRG. 15405. 4 | coding    | 0. 332      | 291  | 3516 | 4925  |
| MSTRG. 15405. 6 | coding    | 0. 391      | 399  | 2430 | 4521  |
| MSTRG. 15402. 1 | noncoding | -0. 0176128 | 336  | 393  | 647   |
| MSTRG. 15416. 3 | noncoding | -0. 069632  | 12   | 24   | 291   |
| MSTRG. 15416. 4 | coding    | 0. 071      | 885  | 1302 | 1929  |
| MSTRG. 15421. 1 | coding    | 0. 079      | 6    | 1731 | 2559  |
| MSTRG. 15421. 2 | coding    | 0. 104      | 2388 | 2874 | 3588  |
| MSTRG. 15422. 1 | noncoding | -0. 02048   | 147  | 243  | 654   |
| MSTRG. 15423. 1 | noncoding | -0. 024576  | 156  | 267  | 710   |
| MSTRG. 15426. 4 | coding    | 0. 148      | 0    | 597  | 4400  |
| MSTRG. 15427. 2 | noncoding | -0. 065536  | 243  | 342  | 909   |
| MSTRG. 15429. 6 | coding    | 0. 297      | 0    | 1968 | 2428  |
| MSTRG. 15429. 7 | coding    | 0. 284      | 0    | 2187 | 2647  |
| MSTRG. 15429. 8 | coding    | 0. 264      | 0    | 2208 | 2668  |
| MSTRG. 15431. 1 | coding    | 0. 377      | 345  | 5421 | 6386  |
| MSTRG. 15431. 3 | coding    | 0. 377      | 3    | 5067 | 6033  |
| MSTRG. 15433. 3 | coding    | 0. 162      | 0    | 1686 | 2884  |
| MSTRG. 15433. 5 | noncoding | -0. 0385024 | 744  | 960  | 10434 |
| MSTRG. 15436. 2 | coding    | 0. 304      | 0    | 1605 | 2137  |
| MSTRG. 15436. 3 | coding    | 0. 399      | 0    | 1563 | 2096  |
| MSTRG. 15442. 1 | noncoding | -0. 096256  | 1962 | 2733 | 3195  |
| MSTRG. 15444. 2 | noncoding | -0. 0311296 | 108  | 174  | 672   |
| MSTRG. 15444. 3 | noncoding | -0. 0221184 | 648  | 885  | 3217  |
| MSTRG. 15447. 5 | noncoding | -0. 0974848 | 1632 | 1908 | 2745  |
| MSTRG. 15447. 4 | coding    | 0. 292      | 627  | 1626 | 2462  |
| MSTRG. 15447. 6 | coding    | 0. 275      | 600  | 1461 | 2298  |

|                 |           |             |       |       |       |
|-----------------|-----------|-------------|-------|-------|-------|
| MSTRG. 15447. 8 | coding    | 0. 275      | 609   | 1470  | 2307  |
| MSTRG. 15447. 9 | noncoding | -0. 0589824 | 78    | 264   | 2434  |
| MSTRG. 15450. 2 | coding    | 0. 311      | 867   | 1902  | 2965  |
| MSTRG. 15450. 3 | coding    | 0. 272      | 243   | 1563  | 2578  |
| MSTRG. 15457. 1 | noncoding | -0. 0679936 | 3276  | 3768  | 3925  |
| MSTRG. 15467. 2 | coding    | 0. 147      | 66    | 5325  | 5517  |
| MSTRG. 15469. 1 | noncoding | -0. 0380928 | 123   | 126   | 382   |
| MSTRG. 15470. 1 | noncoding | -0. 0004096 | 0     | 0     | 201   |
| MSTRG. 15471. 1 | noncoding | -0. 0311296 | 75    | 90    | 248   |
| MSTRG. 15486. 2 | coding    | 0. 335      | 0     | 1725  | 2612  |
| MSTRG. 15486. 4 | coding    | 0. 26       | 0     | 417   | 582   |
| MSTRG. 15490. 1 | noncoding | -0. 0053248 | 948   | 1056  | 4286  |
| MSTRG. 15491. 1 | noncoding | -0. 1114112 | 249   | 261   | 705   |
| MSTRG. 15492. 1 | noncoding | -0. 0131072 | 19707 | 19857 | 24385 |
| MSTRG. 15492. 2 | noncoding | -0. 016384  | 2988  | 3159  | 17879 |
| MSTRG. 15493. 1 | coding    | 0. 07       | 7527  | 7704  | 9873  |
| MSTRG. 15494. 1 | noncoding | -0. 0827392 | 1671  | 1710  | 4026  |
| MSTRG. 15486. 5 | coding    | 0. 349      | 1194  | 2226  | 7387  |
| MSTRG. 15494. 2 | noncoding | -0. 016384  | 1317  | 1356  | 3078  |
| MSTRG. 15497. 1 | coding    | 0. 139      | 15651 | 15987 | 17787 |
| MSTRG. 15499. 1 | noncoding | -0. 08192   | 1536  | 1635  | 5518  |
| MSTRG. 15499. 2 | noncoding | -0. 016384  | 678   | 744   | 965   |
| MSTRG. 15500. 1 | noncoding | -0. 0004096 | 864   | 1008  | 5984  |
| MSTRG. 15502. 1 | coding    | 0. 092      | 2937  | 3408  | 6800  |
| MSTRG. 15503. 1 | noncoding | -0. 032768  | 1596  | 1785  | 3354  |
| MSTRG. 15502. 2 | coding    | 0. 129      | 1407  | 1704  | 2046  |
| MSTRG. 15477. 1 | noncoding | -0. 0004096 | 15    | 15    | 468   |
| MSTRG. 15480. 2 | noncoding | -0. 004096  | 18    | 123   | 3289  |
| MSTRG. 15532. 2 | coding    | 0. 037      | 6564  | 11406 | 12713 |
| MSTRG. 15532. 1 | coding    | 0. 037      | 6747  | 11589 | 12896 |
| MSTRG. 15532. 4 | coding    | 0. 043      | 4404  | 6756  | 7549  |
| MSTRG. 15532. 5 | coding    | 0. 037      | 5928  | 10770 | 11562 |
| MSTRG. 15532. 3 | coding    | 0. 037      | 6105  | 10947 | 11739 |
| MSTRG. 15532. 6 | coding    | 0. 039      | 7185  | 11898 | 12618 |
| MSTRG. 15533. 1 | noncoding | -0. 077824  | 2895  | 2973  | 3794  |
| MSTRG. 15532. 8 | noncoding | -0. 0446464 | 81    | 1029  | 6647  |
| MSTRG. 15534. 1 | noncoding | -0. 0417792 | 477   | 555   | 1701  |
| MSTRG. 15535. 1 | coding    | 0. 081      | 3120  | 3315  | 3584  |
| MSTRG. 15536. 1 | noncoding | -0. 004096  | 1590  | 1701  | 6905  |
| MSTRG. 15535. 3 | coding    | 0. 081      | 3033  | 3228  | 4187  |
| MSTRG. 15535. 4 | coding    | 0. 081      | 3117  | 3312  | 4271  |
| MSTRG. 15538. 1 | noncoding | -0. 116736  | 3045  | 3084  | 6229  |
| MSTRG. 15517. 1 | noncoding | -0. 012288  | 2106  | 2475  | 2687  |
| MSTRG. 15518. 4 | coding    | 0. 152      | 0     | 1653  | 2595  |
| MSTRG. 15518. 5 | coding    | 0. 152      | 0     | 1653  | 3270  |
| MSTRG. 15518. 6 | coding    | 0. 078      | 72    | 1467  | 4756  |
| MSTRG. 15518. 8 | coding    | 0. 09       | 294   | 1587  | 2915  |
| MSTRG. 15518. 7 | coding    | 0. 092      | 459   | 1620  | 2648  |
| MSTRG. 15519. 1 | noncoding | -0. 0794624 | 1155  | 1356  | 1511  |
| MSTRG. 15521. 2 | coding    | 0. 294      | 0     | 339   | 5932  |
| MSTRG. 15521. 3 | coding    | 0. 097      | 1098  | 1275  | 3976  |
| MSTRG. 15528. 3 | noncoding | -0. 024576  | 138   | 243   | 398   |
| MSTRG. 15540. 2 | coding    | 0. 12       | 375   | 3792  | 4033  |
| MSTRG. 15540. 8 | coding    | 0. 11       | 243   | 1254  | 2323  |

|                |           |            |      |      |       |
|----------------|-----------|------------|------|------|-------|
| MSTRG.15540.7  | coding    | 0.083      | 243  | 3273 | 3471  |
| MSTRG.15547.1  | noncoding | -0.0270336 | 3204 | 3366 | 6125  |
| MSTRG.15547.2  | noncoding | -0.0270336 | 2688 | 2850 | 3745  |
| MSTRG.15547.3  | noncoding | -0.0270336 | 3336 | 3498 | 4395  |
| MSTRG.15548.1  | coding    | 0.166      | 3933 | 4332 | 5981  |
| MSTRG.15548.2  | coding    | 0.163      | 795  | 1182 | 1336  |
| MSTRG.15548.3  | coding    | 0.163      | 621  | 1008 | 1165  |
| MSTRG.15549.1  | coding    | 0.197      | 0    | 177  | 373   |
| MSTRG.15554.1  | noncoding | -0.0311296 | 531  | 774  | 1885  |
| MSTRG.15572.1  | noncoding | -0.006144  | 216  | 303  | 1045  |
| MSTRG.15571.3  | noncoding | -0.016384  | 2133 | 2274 | 5703  |
| MSTRG.15571.4  | noncoding | -0.016384  | 408  | 486  | 1151  |
| MSTRG.15563.1  | noncoding | -0.057344  | 81   | 195  | 4687  |
| MSTRG.15574.1  | coding    | 0.099      | 210  | 567  | 972   |
| MSTRG.15575.1  | noncoding | -0.028672  | 1248 | 1308 | 1463  |
| MSTRG.15594.4  | coding    | 0.2        | 342  | 2166 | 5511  |
| MSTRG.15595.1  | coding    | 0.078      | 279  | 888  | 1719  |
| MSTRG.15595.2  | coding    | 0.119      | 324  | 711  | 2486  |
| MSTRG.15596.2  | coding    | 0.395      | 960  | 1878 | 4643  |
| MSTRG.15596.3  | coding    | 0.262      | 222  | 1962 | 4602  |
| MSTRG.15600.2  | coding    | 0.139      | 18   | 591  | 2301  |
| MSTRG.15601.1  | noncoding | -0.028672  | 402  | 594  | 858   |
| MSTRG.15602.1  | noncoding | -0.0004096 | 342  | 435  | 1772  |
| MSTRG.15602.2  | noncoding | -0.0176128 | 252  | 528  | 2131  |
| MSTRG.15603.3  | coding    | 0.081      | 45   | 1302 | 2969  |
| MSTRG.15611.2  | coding    | 0.129      | 162  | 852  | 1310  |
| MSTRG.15614.2  | coding    | 0.159      | 174  | 588  | 888   |
| MSTRG.15618.1  | coding    | 0.037      | 810  | 1527 | 1684  |
| MSTRG.15619.2  | coding    | 0.256      | 213  | 1587 | 3075  |
| MSTRG.15619.3  | coding    | 0.195      | 198  | 918  | 1343  |
| MSTRG.15619.4  | coding    | 0.234      | 150  | 852  | 2340  |
| MSTRG.15625.1  | coding    | 0.244      | 222  | 3591 | 12625 |
| MSTRG.15625.2  | coding    | 0.245      | 222  | 3594 | 4594  |
| MSTRG.15628.2  | coding    | 0.14       | 0    | 819  | 3037  |
| MSTRG.15630.3  | noncoding | -0.0548864 | 0    | 246  | 547   |
| MSTRG.15630.2  | coding    | 0.264      | 594  | 1221 | 4743  |
| MSTRG.15638.2  | coding    | 0.19       | 1152 | 2745 | 3725  |
| MSTRG.15638.3  | coding    | 0.19       | 1440 | 3033 | 3611  |
| MSTRG.15638.4  | coding    | 0.053      | 249  | 1386 | 1852  |
| MSTRG.15638.8  | coding    | 0.043      | 756  | 888  | 1044  |
| MSTRG.15638.10 | noncoding | -0.0188416 | 135  | 258  | 3082  |
| MSTRG.15644.1  | coding    | 0.282      | 573  | 2619 | 2970  |
| MSTRG.15644.4  | noncoding | -0.0917504 | 135  | 408  | 1106  |
| MSTRG.15644.7  | noncoding | -0.0917504 | 57   | 330  | 2051  |
| MSTRG.15644.5  | noncoding | -0.088064  | 57   | 324  | 1023  |
| MSTRG.15644.6  | noncoding | -0.0917504 | 57   | 330  | 1205  |
| MSTRG.15650.1  | noncoding | -0.028672  | 159  | 240  | 787   |
| MSTRG.15651.1  | coding    | 0.087      | 438  | 852  | 2886  |
| MSTRG.15656.1  | noncoding | -0.2048    | 1491 | 1566 | 2368  |
| MSTRG.15671.1  | noncoding | -0.0385024 | 243  | 516  | 870   |
| MSTRG.15654.1  | coding    | 0.059      | 465  | 2097 | 2367  |
| MSTRG.15654.2  | coding    | 0.054      | 474  | 2091 | 3056  |
| MSTRG.15677.1  | noncoding | -0.0438272 | 0    | 393  | 2193  |
| MSTRG.15678.2  | coding    | 0.12       | 0    | 948  | 11983 |

|                |           |            |      |      |       |
|----------------|-----------|------------|------|------|-------|
| MSTRG.15679.1  | noncoding | -0.0262144 | 2010 | 2040 | 3739  |
| MSTRG.15678.3  | coding    | 0.194      | 0    | 1044 | 2758  |
| MSTRG.15678.4  | coding    | 0.141      | 0    | 966  | 3569  |
| MSTRG.15672.1  | noncoding | -0.04096   | 6    | 105  | 260   |
| MSTRG.15674.1  | coding    | 0.332      | 87   | 840  | 1303  |
| MSTRG.15675.1  | noncoding | -0.0454656 | 276  | 417  | 652   |
| MSTRG.15681.2  | noncoding | -0.0434176 | 0    | 159  | 543   |
| MSTRG.15681.3  | noncoding | -0.0479232 | 594  | 720  | 875   |
| MSTRG.15681.5  | coding    | 0.173      | 252  | 1305 | 1679  |
| MSTRG.15681.4  | coding    | 0.173      | 492  | 1545 | 1921  |
| MSTRG.15682.1  | noncoding | -0.057344  | 69   | 147  | 2250  |
| MSTRG.15683.1  | noncoding | -0.053248  | 3162 | 3237 | 6218  |
| MSTRG.15681.6  | noncoding | -0.06144   | 363  | 420  | 576   |
| MSTRG.15684.1  | coding    | 0.159      | 78   | 825  | 1064  |
| MSTRG.15681.8  | noncoding | -0.0212992 | 486  | 648  | 804   |
| MSTRG.15685.2  | coding    | 0.24       | 234  | 2328 | 4566  |
| MSTRG.15692.1  | noncoding | -0.0094208 | 51   | 57   | 228   |
| MSTRG.15694.3  | noncoding | -0.1150976 | 18   | 912  | 19246 |
| MSTRG.15694.1  | noncoding | -0.1138688 | 18   | 912  | 18271 |
| MSTRG.15694.2  | noncoding | -0.1114112 | 18   | 888  | 18251 |
| MSTRG.15694.4  | noncoding | -0.114688  | 18   | 888  | 18310 |
| MSTRG.15701.4  | coding    | 0.298      | 249  | 1965 | 2350  |
| MSTRG.15701.5  | coding    | 0.297      | 0    | 1722 | 2086  |
| MSTRG.15703.5  | coding    | 0.267      | 474  | 1284 | 1604  |
| MSTRG.15703.4  | coding    | 0.293      | 474  | 1347 | 1842  |
| MSTRG.15703.6  | coding    | 0.292      | 474  | 1344 | 1839  |
| MSTRG.15703.7  | coding    | 0.266      | 474  | 1281 | 1628  |
| MSTRG.15705.3  | coding    | 0.28       | 0    | 1482 | 1646  |
| MSTRG.15707.2  | coding    | 0.185      | 114  | 510  | 873   |
| MSTRG.15707.4  | coding    | 0.185      | 132  | 528  | 851   |
| MSTRG.15714.3  | coding    | 0.215      | 0    | 330  | 1658  |
| MSTRG.15714.4  | coding    | 0.215      | 0    | 330  | 1587  |
| MSTRG.15715.1  | coding    | 0.324      | 2268 | 3174 | 3912  |
| MSTRG.15715.5  | coding    | 0.333      | 1146 | 2265 | 3001  |
| MSTRG.15715.6  | coding    | 0.324      | 1407 | 2313 | 3051  |
| MSTRG.15719.2  | coding    | 0.075      | 108  | 354  | 957   |
| MSTRG.15720.1  | coding    | 0.279      | 690  | 2733 | 3508  |
| MSTRG.15720.2  | coding    | 0.279      | 891  | 2934 | 3709  |
| MSTRG.15720.3  | coding    | 0.279      | 471  | 2514 | 3291  |
| MSTRG.15708.1  | coding    | 0.316      | 0    | 306  | 4083  |
| MSTRG.15709.1  | noncoding | -0.0733184 | 33   | 885  | 2210  |
| MSTRG.15711.3  | coding    | 0.32       | 0    | 387  | 575   |
| MSTRG.15722.4  | coding    | 0.222      | 669  | 2253 | 2936  |
| MSTRG.15722.10 | coding    | 0.212      | 621  | 2031 | 2434  |
| MSTRG.15722.9  | coding    | 0.257      | 0    | 2211 | 2613  |
| MSTRG.15724.2  | coding    | 0.308      | 0    | 2148 | 3112  |
| MSTRG.15726.5  | coding    | 0.281      | 93   | 1173 | 1683  |
| MSTRG.15726.6  | coding    | 0.279      | 93   | 1128 | 1594  |
| MSTRG.15723.2  | coding    | 0.385      | 51   | 1950 | 2288  |
| MSTRG.15723.3  | coding    | 0.388      | 0    | 1206 | 1558  |
| MSTRG.15747.3  | coding    | 0.094      | 60   | 4542 | 8162  |
| MSTRG.15750.2  | noncoding | -0.1257472 | 1596 | 2280 | 2918  |
| MSTRG.15750.3  | coding    | 0.433      | 555  | 2787 | 5430  |
| MSTRG.15750.4  | coding    | 0.431      | 0    | 2481 | 3437  |

|                  |           |             |      |      |       |
|------------------|-----------|-------------|------|------|-------|
| MSTRG. 15751. 5  | coding    | 0. 448      | 111  | 1032 | 1404  |
| MSTRG. 15751. 4  | coding    | 0. 491      | 1188 | 2271 | 2642  |
| MSTRG. 15752. 3  | coding    | 0. 267      | 0    | 297  | 4788  |
| MSTRG. 15752. 4  | coding    | 0. 107      | 603  | 1125 | 8665  |
| MSTRG. 15752. 5  | coding    | 0. 107      | 5046 | 5568 | 9446  |
| MSTRG. 15754. 2  | coding    | 0. 546      | 0    | 2748 | 3090  |
| MSTRG. 15756. 4  | coding    | 0. 102      | 306  | 1065 | 2477  |
| MSTRG. 15766. 3  | coding    | 0. 092      | 123  | 4320 | 4807  |
| MSTRG. 15766. 4  | coding    | 0. 092      | 123  | 4440 | 4939  |
| MSTRG. 15766. 10 | coding    | 0. 093      | 144  | 4371 | 4530  |
| MSTRG. 15766. 8  | coding    | 0. 091      | 144  | 4428 | 4587  |
| MSTRG. 15766. 9  | coding    | 0. 094      | 144  | 4374 | 4533  |
| MSTRG. 15767. 1  | noncoding | -0. 012288  | 1323 | 1395 | 2904  |
| MSTRG. 15766. 11 | noncoding | -0. 016384  | 954  | 1059 | 4456  |
| MSTRG. 15766. 12 | noncoding | -0. 0004096 | 0    | 0    | 274   |
| MSTRG. 15766. 13 | noncoding | -0. 0360448 | 207  | 225  | 1054  |
| MSTRG. 15768. 1  | noncoding | -0. 02048   | 849  | 882  | 1452  |
| MSTRG. 15769. 1  | coding    | 0. 146      | 1395 | 1695 | 2978  |
| MSTRG. 15773. 1  | noncoding | -0. 077824  | 0    | 318  | 6448  |
| MSTRG. 15773. 2  | noncoding | -0. 0954368 | 0    | 432  | 8359  |
| MSTRG. 15776. 1  | noncoding | -0. 0499712 | 5454 | 5625 | 5779  |
| MSTRG. 15776. 2  | coding    | 0. 109      | 609  | 1275 | 2522  |
| MSTRG. 15778. 3  | coding    | 0. 123      | 111  | 387  | 2021  |
| MSTRG. 15778. 2  | noncoding | -0. 0352256 | 645  | 894  | 2610  |
| MSTRG. 15781. 1  | noncoding | -0. 0077824 | 0    | 54   | 1016  |
| MSTRG. 15781. 5  | coding    | 0. 234      | 459  | 924  | 1458  |
| MSTRG. 15781. 7  | coding    | 0. 17       | 48   | 441  | 638   |
| MSTRG. 15782. 1  | coding    | 0. 075      | 225  | 1167 | 4182  |
| MSTRG. 15785. 1  | noncoding | -0. 0282624 | 21   | 48   | 334   |
| MSTRG. 15786. 1  | noncoding | -0. 0004096 | 861  | 1038 | 1213  |
| MSTRG. 15786. 2  | noncoding | -0. 004096  | 6    | 48   | 242   |
| MSTRG. 15786. 3  | noncoding | -0. 02048   | 1035 | 1143 | 1632  |
| MSTRG. 15788. 1  | noncoding | -0. 036864  | 675  | 735  | 2033  |
| MSTRG. 15791. 1  | noncoding | -0. 0380928 | 360  | 432  | 917   |
| MSTRG. 15793. 1  | coding    | 0. 078      | 909  | 1254 | 2573  |
| MSTRG. 15795. 1  | noncoding | -0. 0004096 | 0    | 0    | 343   |
| MSTRG. 15796. 1  | noncoding | -0. 0630784 | 6915 | 7089 | 7244  |
| MSTRG. 15796. 2  | noncoding | -0. 024576  | 2712 | 2820 | 10375 |
| MSTRG. 15796. 3  | noncoding | -0. 024576  | 2616 | 2724 | 5598  |
| MSTRG. 15797. 4  | noncoding | -0. 0004096 | 156  | 300  | 581   |
| MSTRG. 15797. 6  | noncoding | -0. 0004096 | 156  | 300  | 1299  |
| MSTRG. 15798. 1  | noncoding | -0. 0004096 | 0    | 0    | 970   |
| MSTRG. 15804. 2  | coding    | 0. 428      | 42   | 1236 | 3188  |
| MSTRG. 15804. 3  | coding    | 0. 428      | 42   | 1236 | 1588  |
| MSTRG. 15804. 5  | coding    | 0. 432      | 0    | 1146 | 3021  |
| MSTRG. 15800. 1  | noncoding | -0. 055296  | 2847 | 3549 | 4106  |
| MSTRG. 15801. 1  | coding    | 0. 478      | 0    | 1128 | 2202  |
| MSTRG. 15809. 10 | coding    | 0. 069      | 21   | 2325 | 5328  |
| MSTRG. 15810. 1  | noncoding | -0. 0004096 | 0    | 0    | 295   |
| MSTRG. 15811. 1  | coding    | 0. 078      | 105  | 1029 | 3224  |
| MSTRG. 15812. 1  | noncoding | -0. 049152  | 1113 | 1125 | 2054  |
| MSTRG. 15813. 2  | coding    | 0. 101      | 3498 | 3855 | 9314  |
| MSTRG. 15813. 1  | coding    | 0. 095      | 3570 | 3852 | 9379  |
| MSTRG. 15813. 3  | coding    | 0. 095      | 2949 | 3231 | 7099  |



|                  |           |             |      |      |      |
|------------------|-----------|-------------|------|------|------|
| MSTRG. 15813. 4  | coding    | 0. 095      | 2847 | 3129 | 7144 |
| MSTRG. 15809. 11 | coding    | 0. 054      | 573  | 975  | 4260 |
| MSTRG. 15806. 1  | noncoding | -0. 02048   | 1914 | 1992 | 2358 |
| MSTRG. 15807. 1  | coding    | 0. 121      | 216  | 1005 | 1665 |
| MSTRG. 15816. 1  | noncoding | -0. 096256  | 0    | 126  | 635  |
| MSTRG. 15816. 2  | noncoding | -0. 0536576 | 0    | 78   | 547  |
| MSTRG. 15814. 1  | noncoding | -0. 0270336 | 921  | 1017 | 1952 |
| MSTRG. 15817. 1  | coding    | 0. 263      | 0    | 1302 | 1937 |
| MSTRG. 15821. 1  | noncoding | -0. 0004096 | 0    | 0    | 225  |
| MSTRG. 15822. 3  | coding    | 0. 269      | 129  | 1680 | 1874 |
| MSTRG. 15826. 1  | noncoding | -0. 034816  | 540  | 699  | 953  |
| MSTRG. 15832. 1  | noncoding | -0. 02048   | 36   | 153  | 351  |
| MSTRG. 15834. 1  | noncoding | -0. 012288  | 225  | 315  | 483  |
| MSTRG. 15834. 2  | noncoding | -0. 0004096 | 222  | 282  | 565  |
| MSTRG. 15835. 1  | noncoding | -0. 0606208 | 726  | 816  | 970  |
| MSTRG. 15835. 2  | noncoding | -0. 0352256 | 126  | 129  | 458  |
| MSTRG. 15841. 1  | coding    | 0. 139      | 108  | 2211 | 3093 |
| MSTRG. 15841. 2  | coding    | 0. 242      | 597  | 1407 | 1562 |
| MSTRG. 15843. 2  | coding    | 0. 342      | 0    | 255  | 2749 |
| MSTRG. 15846. 6  | coding    | 0. 264      | 51   | 504  | 1120 |
| MSTRG. 15846. 5  | coding    | 0. 274      | 198  | 657  | 1274 |
| MSTRG. 15847. 1  | noncoding | -0. 098304  | 1248 | 1257 | 1425 |
| MSTRG. 15848. 1  | coding    | 0. 367      | 141  | 1074 | 1544 |
| MSTRG. 15848. 2  | coding    | 0. 334      | 615  | 1662 | 2131 |
| MSTRG. 15848. 3  | coding    | 0. 376      | 0    | 951  | 1420 |
| MSTRG. 15858. 1  | coding    | 0. 04       | 249  | 363  | 1678 |
| MSTRG. 15858. 2  | coding    | 0. 127      | 0    | 627  | 2155 |
| MSTRG. 15858. 3  | coding    | 0. 043      | 189  | 1122 | 2179 |
| MSTRG. 15868. 1  | coding    | 0. 333      | 3417 | 6210 | 6431 |
| MSTRG. 15868. 6  | coding    | 0. 33       | 591  | 3372 | 5891 |
| MSTRG. 15868. 9  | coding    | 0. 327      | 288  | 3033 | 5553 |
| MSTRG. 15868. 7  | coding    | 0. 331      | 846  | 3675 | 6195 |
| MSTRG. 15868. 3  | coding    | 0. 333      | 108  | 2937 | 5457 |
| MSTRG. 15868. 10 | coding    | 0. 329      | 486  | 3258 | 3431 |
| MSTRG. 15867. 3  | noncoding | -0. 1196032 | 81   | 492  | 1749 |
| MSTRG. 15873. 2  | coding    | 0. 237      | 909  | 2160 | 2979 |
| MSTRG. 15874. 2  | coding    | 0. 309      | 0    | 1161 | 1317 |
| MSTRG. 15879. 2  | coding    | 0. 136      | 417  | 2187 | 2908 |
| MSTRG. 15886. 2  | coding    | 0. 155      | 276  | 1815 | 4308 |
| MSTRG. 15890. 1  | noncoding | -0. 114688  | 96   | 135  | 320  |
| MSTRG. 15891. 2  | coding    | 0. 471      | 0    | 714  | 1860 |
| MSTRG. 15896. 2  | coding    | 0. 316      | 2061 | 2535 | 2954 |
| MSTRG. 15902. 5  | coding    | 0. 344      | 219  | 2796 | 3058 |
| MSTRG. 15902. 3  | coding    | 0. 342      | 312  | 3123 | 3386 |
| MSTRG. 15902. 4  | coding    | 0. 386      | 0    | 3087 | 3350 |
| MSTRG. 15902. 6  | coding    | 0. 341      | 1008 | 3615 | 3850 |
| MSTRG. 15903. 1  | noncoding | -0. 0520192 | 0    | 201  | 722  |
| MSTRG. 15897. 1  | coding    | 0. 051      | 132  | 321  | 2102 |
| MSTRG. 15898. 1  | noncoding | -0. 0495616 | 2502 | 2685 | 2839 |
| MSTRG. 15899. 3  | coding    | 0. 15       | 0    | 1350 | 3138 |
| MSTRG. 15899. 2  | coding    | 0. 128      | 492  | 1425 | 2197 |
| MSTRG. 15899. 4  | coding    | 0. 155      | 0    | 1305 | 2094 |
| MSTRG. 15909. 4  | coding    | 0. 143      | 2451 | 7590 | 9162 |
| MSTRG. 15909. 1  | coding    | 0. 105      | 201  | 4188 | 4613 |

|                |           |            |       |       |       |
|----------------|-----------|------------|-------|-------|-------|
| MSTRG.15909.6  | coding    | 0.143      | 87    | 5226  | 6799  |
| MSTRG.15907.1  | noncoding | -0.0004096 | 0     | 0     | 493   |
| MSTRG.15917.2  | coding    | 0.279      | 648   | 1629  | 5884  |
| MSTRG.15917.3  | coding    | 0.256      | 276   | 1092  | 5347  |
| MSTRG.15917.6  | coding    | 0.256      | 873   | 1689  | 1931  |
| MSTRG.15917.7  | coding    | 0.292      | 363   | 1227  | 1470  |
| MSTRG.15917.5  | coding    | 0.245      | 492   | 1545  | 1787  |
| MSTRG.15917.8  | coding    | 0.272      | 936   | 1917  | 2151  |
| MSTRG.15917.9  | coding    | 0.256      | 687   | 1503  | 1705  |
| MSTRG.15917.10 | noncoding | -0.038912  | 2580  | 2850  | 3006  |
| MSTRG.15914.2  | coding    | 0.455      | 0     | 1365  | 3332  |
| MSTRG.15913.1  | noncoding | -0.0446464 | 489   | 522   | 994   |
| MSTRG.15921.1  | noncoding | -0.0004096 | 0     | 0     | 513   |
| MSTRG.15929.1  | coding    | 0.462      | 45    | 4659  | 6697  |
| MSTRG.15929.4  | coding    | 0.491      | 0     | 4146  | 6237  |
| MSTRG.15930.1  | noncoding | -0.0692224 | 534   | 900   | 2895  |
| MSTRG.15929.5  | coding    | 0.463      | 699   | 4794  | 6830  |
| MSTRG.15929.7  | coding    | 0.474      | 4416  | 8346  | 9739  |
| MSTRG.15929.9  | coding    | 0.467      | 4416  | 8412  | 9805  |
| MSTRG.15929.10 | coding    | 0.461      | 4359  | 8466  | 10504 |
| MSTRG.15929.11 | coding    | 0.468      | 588   | 4629  | 6720  |
| MSTRG.15932.1  | coding    | 0.405      | 0     | 2184  | 10762 |
| MSTRG.15932.2  | coding    | 0.457      | 0     | 774   | 1034  |
| MSTRG.15931.1  | noncoding | -0.0548864 | 0     | 204   | 359   |
| MSTRG.15936.2  | coding    | 0.234      | 201   | 678   | 915   |
| MSTRG.15936.3  | coding    | 0.182      | 204   | 531   | 768   |
| MSTRG.15937.3  | coding    | 0.282      | 0     | 378   | 754   |
| MSTRG.15935.1  | coding    | 0.411      | 0     | 816   | 1645  |
| MSTRG.15940.1  | coding    | 0.247      | 186   | 870   | 1464  |
| MSTRG.15940.4  | coding    | 0.193      | 87    | 531   | 689   |
| MSTRG.15943.1  | noncoding | -0.090112  | 0     | 102   | 494   |
| MSTRG.15961.2  | coding    | 0.073      | 4008  | 5121  | 8410  |
| MSTRG.15962.3  | coding    | 0.171      | 369   | 3426  | 4424  |
| MSTRG.15962.2  | coding    | 0.174      | 270   | 3408  | 4160  |
| MSTRG.15962.7  | coding    | 0.166      | 11112 | 14145 | 15142 |
| MSTRG.15963.1  | noncoding | -0.0098304 | 951   | 1131  | 5240  |
| MSTRG.15964.1  | noncoding | -0.012288  | 7413  | 7497  | 9389  |
| MSTRG.15952.1  | coding    | 0.28       | 0     | 3189  | 3706  |
| MSTRG.15955.1  | noncoding | -0.012288  | 1251  | 1299  | 3073  |
| MSTRG.15956.1  | coding    | 0.074      | 3618  | 3888  | 6436  |
| MSTRG.15957.1  | noncoding | -0.018432  | 2685  | 2850  | 3004  |
| MSTRG.15958.1  | noncoding | -0.028672  | 1611  | 1695  | 3338  |
| MSTRG.15951.1  | noncoding | -0.1421312 | 0     | 45    | 426   |
| MSTRG.15969.2  | coding    | 0.243      | 0     | 354   | 1819  |
| MSTRG.15969.3  | coding    | 0.203      | 9     | 372   | 1838  |
| MSTRG.15969.4  | coding    | 0.203      | 234   | 597   | 2062  |
| MSTRG.15973.1  | noncoding | -0.090112  | 0     | 57    | 311   |
| MSTRG.15974.1  | coding    | 0.527      | 252   | 1827  | 3377  |
| MSTRG.15974.5  | coding    | 0.526      | 153   | 1497  | 2014  |
| MSTRG.15978.5  | coding    | 0.211      | 9606  | 10647 | 14287 |
| MSTRG.15978.7  | coding    | 0.182      | 3078  | 3348  | 3523  |
| MSTRG.15978.6  | coding    | 0.107      | 16803 | 17259 | 23994 |
| MSTRG.15979.1  | noncoding | -0.02048   | 774   | 822   | 2702  |
| MSTRG.15980.1  | coding    | 0.135      | 30    | 216   | 429   |

|                  |           |             |      |      |      |
|------------------|-----------|-------------|------|------|------|
| MSTRG. 15981. 1  | noncoding | -0. 024576  | 3768 | 3900 | 5408 |
| MSTRG. 15978. 8  | noncoding | -0. 004096  | 6681 | 6786 | 8066 |
| MSTRG. 15982. 1  | noncoding | -0. 008192  | 93   | 156  | 670  |
| MSTRG. 15978. 9  | noncoding | -0. 1036288 | 0    | 186  | 4319 |
| MSTRG. 15976. 2  | coding    | 0. 273      | 0    | 894  | 1280 |
| MSTRG. 15990. 4  | coding    | 0. 338      | 477  | 2346 | 3806 |
| MSTRG. 15994. 1  | coding    | 0. 141      | 240  | 1365 | 1538 |
| MSTRG. 15996. 1  | noncoding | -0. 0004096 | 0    | 0    | 430  |
| MSTRG. 15997. 1  | noncoding | -0. 0630784 | 207  | 414  | 946  |
| MSTRG. 15998. 4  | coding    | 0. 211      | 348  | 1938 | 2225 |
| MSTRG. 15998. 3  | coding    | 0. 229      | 0    | 1446 | 1733 |
| MSTRG. 15998. 10 | coding    | 0. 289      | 7119 | 7797 | 8087 |
| MSTRG. 15998. 11 | coding    | 0. 238      | 432  | 1782 | 2074 |
| MSTRG. 15998. 9  | coding    | 0. 238      | 459  | 1809 | 2099 |
| MSTRG. 15999. 1  | noncoding | -0. 0094208 | 75   | 276  | 580  |
| MSTRG. 16000. 1  | noncoding | -0. 0917504 | 252  | 279  | 609  |
| MSTRG. 16003. 1  | coding    | 0. 256      | 0    | 1014 | 1701 |
| MSTRG. 16004. 1  | noncoding | -0. 006144  | 732  | 987  | 2706 |
| MSTRG. 16006. 1  | noncoding | -0. 0770048 | 0    | 168  | 322  |
| MSTRG. 16005. 2  | noncoding | -0. 0782336 | 2625 | 3402 | 3557 |
| MSTRG. 16012. 1  | noncoding | -0. 0024576 | 60   | 216  | 627  |
| MSTRG. 16013. 2  | coding    | 0. 238      | 39   | 3321 | 3727 |
| MSTRG. 16014. 1  | noncoding | -0. 0413696 | 624  | 807  | 1162 |
| MSTRG. 16015. 2  | coding    | 0. 368      | 0    | 1335 | 1837 |
| MSTRG. 16019. 1  | coding    | 0. 108      | 819  | 2472 | 8210 |
| MSTRG. 16019. 2  | coding    | 0. 145      | 831  | 1596 | 3785 |
| MSTRG. 16022. 2  | coding    | 0. 642      | 0    | 2337 | 3750 |
| MSTRG. 16027. 2  | coding    | 0. 392      | 0    | 3186 | 3425 |
| MSTRG. 16031. 2  | coding    | 0. 275      | 78   | 2250 | 2418 |
| MSTRG. 16034. 2  | noncoding | -0. 0483328 | 552  | 732  | 1329 |
| MSTRG. 16035. 1  | noncoding | -0. 073728  | 192  | 270  | 778  |
| MSTRG. 16039. 1  | coding    | 0. 433      | 1629 | 3324 | 4579 |
| MSTRG. 16039. 2  | coding    | 0. 433      | 159  | 1677 | 2933 |
| MSTRG. 16041. 1  | coding    | 0. 368      | 0    | 606  | 876  |
| MSTRG. 16042. 2  | noncoding | -0. 0004096 | 561  | 687  | 841  |
| MSTRG. 16042. 3  | noncoding | -0. 045056  | 144  | 333  | 708  |
| MSTRG. 16042. 4  | noncoding | -0. 0786432 | 0    | 207  | 805  |
| MSTRG. 16044. 3  | coding    | 0. 484      | 2265 | 3675 | 4911 |
| MSTRG. 16049. 2  | coding    | 0. 453      | 0    | 900  | 4387 |
| MSTRG. 16050. 3  | coding    | 0. 437      | 0    | 756  | 1172 |
| MSTRG. 16050. 4  | coding    | 0. 396      | 0    | 435  | 1783 |
| MSTRG. 16052. 1  | noncoding | -0. 04096   | 6717 | 7116 | 7813 |
| MSTRG. 16052. 2  | noncoding | -0. 0643072 | 4857 | 5325 | 6044 |
| MSTRG. 16052. 3  | noncoding | -0. 0643072 | 3840 | 4308 | 5605 |
| MSTRG. 16056. 1  | noncoding | -0. 0598016 | 4293 | 4584 | 4868 |
| MSTRG. 16057. 12 | coding    | 0. 441      | 192  | 2148 | 2360 |
| MSTRG. 16057. 15 | coding    | 0. 441      | 186  | 2142 | 2355 |
| MSTRG. 16057. 11 | coding    | 0. 366      | 0    | 3255 | 4740 |
| MSTRG. 16057. 14 | coding    | 0. 358      | 0    | 3312 | 4797 |
| MSTRG. 16057. 17 | coding    | 0. 451      | 555  | 2739 | 5223 |
| MSTRG. 16057. 19 | coding    | 0. 482      | 774  | 3237 | 4724 |
| MSTRG. 16057. 20 | coding    | 0. 47       | 156  | 2088 | 3575 |
| MSTRG. 16067. 2  | coding    | 0. 438      | 0    | 1266 | 1427 |
| MSTRG. 16058. 1  | coding    | 0. 171      | 0    | 1248 | 1867 |

|                |           |            |      |      |       |
|----------------|-----------|------------|------|------|-------|
| MSTRG.16064.2  | coding    | 0.492      | 0    | 1197 | 3723  |
| MSTRG.16064.3  | coding    | 0.455      | 228  | 1461 | 2680  |
| MSTRG.16064.4  | coding    | 0.501      | 99   | 1134 | 1835  |
| MSTRG.16064.7  | coding    | 0.474      | 0    | 1206 | 3732  |
| MSTRG.16069.2  | coding    | 0.352      | 174  | 1812 | 2238  |
| MSTRG.16069.5  | coding    | 0.404      | 132  | 1464 | 1997  |
| MSTRG.16069.6  | coding    | 0.378      | 996  | 2466 | 2997  |
| MSTRG.16069.8  | coding    | 0.398      | 996  | 1875 | 2411  |
| MSTRG.16072.1  | noncoding | -0.0344064 | 48   | 303  | 459   |
| MSTRG.16079.2  | coding    | 0.331      | 0    | 4938 | 5458  |
| MSTRG.16079.4  | coding    | 0.332      | 291  | 5184 | 5705  |
| MSTRG.16074.1  | coding    | 0.417      | 792  | 3066 | 4290  |
| MSTRG.16074.3  | coding    | 0.37       | 54   | 765  | 2819  |
| MSTRG.16081.1  | coding    | 0.523      | 0    | 1878 | 4134  |
| MSTRG.16082.2  | coding    | 0.391      | 432  | 1479 | 2817  |
| MSTRG.16082.3  | coding    | 0.385      | 153  | 1143 | 2480  |
| MSTRG.16082.4  | noncoding | -0.0339968 | 774  | 1953 | 3498  |
| MSTRG.16076.2  | coding    | 0.508      | 0    | 1200 | 1363  |
| MSTRG.16083.1  | noncoding | -0.0434176 | 3204 | 3612 | 4056  |
| MSTRG.16083.2  | noncoding | -0.034816  | 1152 | 1338 | 1784  |
| MSTRG.16083.3  | noncoding | -0.1024    | 420  | 486  | 887   |
| MSTRG.16088.2  | coding    | 0.477      | 189  | 921  | 1103  |
| MSTRG.16088.4  | coding    | 0.465      | 462  | 1056 | 1238  |
| MSTRG.16085.1  | coding    | 0.549      | 0    | 1350 | 1852  |
| MSTRG.16092.3  | coding    | 0.509      | 1563 | 4455 | 5902  |
| MSTRG.16093.3  | coding    | 0.364      | 339  | 768  | 3717  |
| MSTRG.16104.1  | coding    | 0.369      | 5220 | 7527 | 9365  |
| MSTRG.16104.4  | coding    | 0.369      | 3324 | 5631 | 7471  |
| MSTRG.16104.5  | coding    | 0.408      | 4548 | 8013 | 9852  |
| MSTRG.16102.1  | coding    | 0.428      | 0    | 918  | 4637  |
| MSTRG.16109.4  | coding    | 0.182      | 0    | 6135 | 7098  |
| MSTRG.16110.1  | noncoding | -0.0024576 | 588  | 669  | 930   |
| MSTRG.16113.5  | coding    | 0.38       | 0    | 5859 | 11038 |
| MSTRG.16113.6  | coding    | 0.383      | 126  | 5835 | 9130  |
| MSTRG.16113.8  | coding    | 0.383      | 126  | 5832 | 9127  |
| MSTRG.16113.7  | coding    | 0.363      | 126  | 6969 | 10949 |
| MSTRG.16113.9  | coding    | 0.399      | 3    | 5301 | 8596  |
| MSTRG.16113.11 | coding    | 0.406      | 1734 | 6720 | 10106 |
| MSTRG.16113.12 | coding    | 0.379      | 177  | 2025 | 5321  |
| MSTRG.16113.13 | coding    | 0.356      | 1689 | 3927 | 8280  |
| MSTRG.16113.14 | coding    | 0.383      | 774  | 2322 | 7505  |
| MSTRG.16117.2  | coding    | 0.441      | 0    | 3396 | 5646  |
| MSTRG.16117.3  | coding    | 0.445      | 1449 | 3285 | 5436  |
| MSTRG.16118.1  | noncoding | -0.0258048 | 459  | 750  | 925   |
| MSTRG.16123.1  | noncoding | -0.0741376 | 1668 | 2055 | 2218  |
| MSTRG.16128.1  | coding    | 0.072      | 579  | 8484 | 13631 |
| MSTRG.16128.5  | coding    | 0.071      | 417  | 8262 | 11064 |
| MSTRG.16128.6  | coding    | 0.071      | 471  | 8268 | 11072 |
| MSTRG.16129.1  | coding    | 0.105      | 1041 | 1749 | 7920  |
| MSTRG.16129.2  | coding    | 0.108      | 1065 | 1737 | 7779  |
| MSTRG.16129.3  | noncoding | -0.065536  | 1221 | 1311 | 3815  |
| MSTRG.16132.2  | coding    | 0.277      | 57   | 2223 | 2530  |
| MSTRG.16132.3  | coding    | 0.289      | 441  | 2472 | 3012  |
| MSTRG.16133.1  | noncoding | -0.0073728 | 12   | 210  | 9437  |

|                 |           |             |      |      |       |
|-----------------|-----------|-------------|------|------|-------|
| MSTRG. 16133. 2 | coding    | 0. 271      | 408  | 2406 | 7142  |
| MSTRG. 16133. 4 | coding    | 0. 34       | 0    | 2037 | 13592 |
| MSTRG. 16136. 1 | coding    | 0. 373      | 0    | 1770 | 1927  |
| MSTRG. 16136. 2 | coding    | 0. 419      | 0    | 1368 | 1566  |
| MSTRG. 16138. 2 | coding    | 0. 291      | 0    | 3003 | 7927  |
| MSTRG. 16138. 5 | coding    | 0. 273      | 0    | 2565 | 7774  |
| MSTRG. 16138. 6 | coding    | 0. 291      | 0    | 3003 | 3644  |
| MSTRG. 16144. 1 | noncoding | -0. 0290816 | 435  | 753  | 1032  |
| MSTRG. 16144. 4 | coding    | 0. 358      | 432  | 1134 | 1427  |
| MSTRG. 16148. 2 | coding    | 0. 541      | 0    | 4665 | 5028  |
| MSTRG. 16148. 5 | coding    | 0. 535      | 0    | 4641 | 4796  |
| MSTRG. 16149. 1 | noncoding | -0. 0712704 | 0    | 708  | 1931  |
| MSTRG. 16159. 1 | coding    | 0. 319      | 0    | 3117 | 3634  |
| MSTRG. 16159. 2 | coding    | 0. 324      | 0    | 2805 | 3012  |
| MSTRG. 16159. 3 | coding    | 0. 322      | 0    | 2640 | 3403  |
| MSTRG. 16159. 4 | coding    | 0. 328      | 0    | 2610 | 3374  |
| MSTRG. 16159. 5 | coding    | 0. 312      | 600  | 3615 | 4061  |
| MSTRG. 16162. 1 | noncoding | -0. 0585728 | 0    | 1452 | 1609  |
| MSTRG. 16163. 5 | coding    | 0. 403      | 390  | 4599 | 5256  |
| MSTRG. 16167. 2 | coding    | 0. 297      | 0    | 2154 | 2961  |
| MSTRG. 16170. 5 | coding    | 0. 325      | 192  | 7377 | 8677  |
| MSTRG. 16174. 2 | coding    | 0. 477      | 78   | 822  | 1346  |
| MSTRG. 16191. 3 | coding    | 0. 512      | 1356 | 3282 | 3437  |
| MSTRG. 16191. 4 | coding    | 0. 507      | 1665 | 3639 | 3793  |
| MSTRG. 16191. 5 | coding    | 0. 505      | 1062 | 2625 | 2778  |
| MSTRG. 16182. 2 | coding    | 0. 207      | 0    | 1359 | 2155  |
| MSTRG. 16196. 2 | coding    | 0. 539      | 0    | 2514 | 4848  |
| MSTRG. 16198. 1 | coding    | 0. 541      | 309  | 2742 | 5729  |
| MSTRG. 16198. 2 | coding    | 0. 49       | 0    | 2772 | 5596  |
| MSTRG. 16199. 1 | noncoding | -0. 0466944 | 201  | 1251 | 1408  |
| MSTRG. 16195. 3 | coding    | 0. 404      | 177  | 1242 | 1574  |
| MSTRG. 16201. 2 | coding    | 0. 266      | 570  | 3885 | 5415  |
| MSTRG. 16201. 3 | coding    | 0. 265      | 69   | 3426 | 4956  |
| MSTRG. 16201. 6 | coding    | 0. 271      | 0    | 3132 | 4636  |
| MSTRG. 16202. 1 | noncoding | -0. 034816  | 396  | 1806 | 3148  |
| MSTRG. 16201. 7 | coding    | 0. 247      | 258  | 3459 | 4988  |
| MSTRG. 16203. 1 | coding    | 0. 465      | 0    | 1641 | 2579  |
| MSTRG. 16207. 1 | noncoding | -0. 0303104 | 99   | 879  | 3073  |
| MSTRG. 16210. 2 | coding    | 0. 245      | 0    | 675  | 974   |
| MSTRG. 16211. 1 | coding    | 0. 377      | 216  | 1578 | 2114  |
| MSTRG. 16214. 2 | noncoding | -0. 0888832 | 0    | 459  | 889   |
| MSTRG. 16214. 3 | coding    | 0. 39       | 0    | 264  | 694   |
| MSTRG. 16215. 1 | noncoding | -0. 0503808 | 0    | 60   | 391   |
| MSTRG. 16217. 1 | coding    | 0. 382      | 5658 | 9885 | 10519 |
| MSTRG. 16218. 3 | coding    | 0. 375      | 1206 | 3627 | 3879  |
| MSTRG. 16218. 4 | coding    | 0. 375      | 1101 | 3522 | 3780  |
| MSTRG. 16221. 4 | coding    | 0. 494      | 0    | 2202 | 2409  |
| MSTRG. 16221. 3 | coding    | 0. 495      | 693  | 2166 | 2373  |
| MSTRG. 16222. 1 | noncoding | -0. 1150976 | 780  | 2322 | 2518  |
| MSTRG. 16222. 3 | noncoding | -0. 13312   | 0    | 957  | 1112  |
| MSTRG. 16219. 1 | noncoding | -0. 0208896 | 177  | 390  | 682   |
| MSTRG. 16226. 5 | noncoding | -0. 0851968 | 216  | 669  | 825   |
| MSTRG. 16239. 3 | coding    | 0. 409      | 0    | 2109 | 2680  |
| MSTRG. 16239. 4 | coding    | 0. 437      | 0    | 1863 | 2597  |

|                  |           |             |      |      |       |
|------------------|-----------|-------------|------|------|-------|
| MSTRG. 16244. 1  | coding    | 0. 455      | 282  | 1107 | 1808  |
| MSTRG. 16244. 3  | coding    | 0. 448      | 324  | 1803 | 2193  |
| MSTRG. 16244. 5  | coding    | 0. 42       | 1992 | 3687 | 4077  |
| MSTRG. 16242. 7  | noncoding | -0. 0516096 | 15   | 246  | 400   |
| MSTRG. 16233. 1  | coding    | 0. 447      | 3357 | 4290 | 4446  |
| MSTRG. 16233. 2  | coding    | 0. 259      | 156  | 621  | 776   |
| MSTRG. 16248. 2  | coding    | 0. 495      | 0    | 1731 | 2235  |
| MSTRG. 16248. 3  | coding    | 0. 483      | 0    | 1782 | 2286  |
| MSTRG. 16237. 1  | noncoding | -0. 0770048 | 186  | 606  | 847   |
| MSTRG. 16252. 3  | coding    | 0. 348      | 564  | 1575 | 1746  |
| MSTRG. 16252. 4  | coding    | 0. 348      | 855  | 1866 | 2039  |
| MSTRG. 16252. 1  | coding    | 0. 308      | 255  | 1398 | 1569  |
| MSTRG. 16253. 2  | noncoding | -0. 1142784 | 786  | 1623 | 1779  |
| MSTRG. 16253. 6  | coding    | 0. 266      | 0    | 999  | 1155  |
| MSTRG. 16253. 7  | noncoding | -0. 1142784 | 216  | 1053 | 1208  |
| MSTRG. 16254. 1  | coding    | 0. 486      | 0    | 2577 | 3076  |
| MSTRG. 16261. 2  | coding    | 0. 283      | 57   | 8868 | 9022  |
| MSTRG. 16261. 6  | coding    | 0. 51       | 192  | 3930 | 4358  |
| MSTRG. 16261. 5  | coding    | 0. 511      | 0    | 3927 | 4356  |
| MSTRG. 16263. 5  | coding    | 0. 306      | 0    | 1455 | 1641  |
| MSTRG. 16263. 3  | coding    | 0. 529      | 0    | 618  | 1891  |
| MSTRG. 16263. 4  | coding    | 0. 431      | 0    | 1389 | 1577  |
| MSTRG. 16263. 2  | coding    | 0. 267      | 630  | 1944 | 2132  |
| MSTRG. 16258. 1  | noncoding | -0. 0663552 | 255  | 462  | 1887  |
| MSTRG. 16258. 2  | noncoding | -0. 0294912 | 354  | 558  | 1985  |
| MSTRG. 16264. 6  | coding    | 0. 427      | 723  | 3225 | 8035  |
| MSTRG. 16265. 1  | noncoding | -0. 0667648 | 0    | 150  | 1471  |
| MSTRG. 16264. 10 | coding    | 0. 452      | 0    | 2421 | 11663 |
| MSTRG. 16264. 9  | coding    | 0. 479      | 0    | 4017 | 4402  |
| MSTRG. 16264. 11 | noncoding | -0. 0229376 | 159  | 666  | 857   |
| MSTRG. 16269. 1  | noncoding | -0. 0401408 | 1536 | 2457 | 4053  |
| MSTRG. 16269. 2  | noncoding | -0. 0339968 | 1491 | 2760 | 2917  |
| MSTRG. 16269. 3  | noncoding | -0. 0421888 | 1359 | 2625 | 3957  |
| MSTRG. 16270. 1  | coding    | 0. 469      | 723  | 2295 | 6811  |
| MSTRG. 16270. 2  | coding    | 0. 469      | 657  | 2229 | 6743  |
| MSTRG. 16270. 3  | coding    | 0. 469      | 585  | 2157 | 7592  |
| MSTRG. 16273. 1  | noncoding | -0. 1024    | 300  | 351  | 758   |
| MSTRG. 16274. 2  | coding    | 0. 059      | 1110 | 1596 | 1975  |
| MSTRG. 16275. 1  | noncoding | -0. 045056  | 102  | 168  | 416   |
| MSTRG. 16276. 1  | noncoding | -0. 0786432 | 0    | 474  | 1766  |
| MSTRG. 16278. 2  | noncoding | -0. 02048   | 9    | 147  | 3228  |
| MSTRG. 16284. 1  | noncoding | -0. 024576  | 0    | 3    | 220   |
| MSTRG. 16288. 1  | noncoding | -0. 0114688 | 804  | 984  | 4296  |
| MSTRG. 16291. 1  | noncoding | -0. 028672  | 1287 | 1365 | 2298  |
| MSTRG. 16296. 1  | noncoding | -0. 0004096 | 381  | 381  | 894   |
| MSTRG. 16299. 1  | noncoding | -0. 008192  | 0    | 72   | 234   |
| MSTRG. 16299. 2  | noncoding | -0. 004096  | 0    | 84   | 272   |
| MSTRG. 16302. 1  | noncoding | -0. 0106496 | 138  | 273  | 680   |
| MSTRG. 16307. 1  | noncoding | -0. 0364544 | 978  | 1326 | 1719  |
| MSTRG. 16319. 2  | coding    | 0. 036      | 2994 | 3609 | 8888  |
| MSTRG. 16319. 3  | coding    | 0. 07       | 30   | 990  | 6248  |
| MSTRG. 16319. 4  | coding    | 0. 07       | 30   | 987  | 6127  |
| MSTRG. 16319. 5  | coding    | 0. 07       | 30   | 987  | 6230  |
| MSTRG. 16319. 6  | coding    | 0. 07       | 27   | 984  | 5999  |

|                  |           |             |      |      |       |
|------------------|-----------|-------------|------|------|-------|
| MSTRG. 16320. 2  | noncoding | -0. 008192  | 1869 | 1995 | 4243  |
| MSTRG. 16321. 1  | coding    | 0. 173      | 1962 | 3744 | 5529  |
| MSTRG. 16326. 1  | coding    | 0. 349      | 132  | 1920 | 2321  |
| MSTRG. 16327. 1  | coding    | 0. 165      | 234  | 1266 | 2014  |
| MSTRG. 16328. 1  | noncoding | -0. 0237568 | 891  | 954  | 1120  |
| MSTRG. 16329. 3  | coding    | 0. 059      | 363  | 2634 | 4686  |
| MSTRG. 16329. 4  | noncoding | -0. 0045056 | 387  | 552  | 4811  |
| MSTRG. 16330. 2  | coding    | 0. 176      | 0    | 5586 | 11258 |
| MSTRG. 16332. 1  | coding    | 0. 149      | 258  | 3159 | 4290  |
| MSTRG. 16334. 5  | coding    | 0. 064      | 105  | 5655 | 8920  |
| MSTRG. 16336. 1  | noncoding | -0. 0004096 | 0    | 0    | 212   |
| MSTRG. 16337. 1  | coding    | 0. 108      | 264  | 486  | 1114  |
| MSTRG. 16339. 2  | noncoding | -0. 2224128 | 0    | 126  | 2852  |
| MSTRG. 16349. 1  | noncoding | -0. 0290816 | 2787 | 2934 | 5659  |
| MSTRG. 16345. 2  | noncoding | -0. 1019904 | 0    | 252  | 6023  |
| MSTRG. 16345. 3  | noncoding | -0. 0434176 | 2124 | 2340 | 5904  |
| MSTRG. 16343. 1  | noncoding | -0. 094208  | 249  | 255  | 645   |
| MSTRG. 16340. 1  | noncoding | -0. 069632  | 81   | 129  | 450   |
| MSTRG. 16351. 1  | noncoding | -0. 0884736 | 21   | 549  | 1114  |
| MSTRG. 16351. 2  | noncoding | -0. 1204224 | 0    | 162  | 916   |
| MSTRG. 16352. 4  | noncoding | -0. 1110016 | 1353 | 1593 | 2813  |
| MSTRG. 16353. 1  | noncoding | -0. 006144  | 5994 | 6054 | 7663  |
| MSTRG. 16354. 1  | noncoding | -0. 016384  | 2187 | 2247 | 2841  |
| MSTRG. 16358. 2  | coding    | 0. 094      | 0    | 1227 | 1869  |
| MSTRG. 16358. 3  | coding    | 0. 107      | 0    | 1374 | 1572  |
| MSTRG. 16361. 2  | noncoding | -0. 0802816 | 33   | 303  | 9125  |
| MSTRG. 16361. 1  | coding    | 0. 121      | 33   | 861  | 4406  |
| MSTRG. 16361. 3  | coding    | 0. 096      | 0    | 723  | 1968  |
| MSTRG. 16361. 5  | coding    | 0. 099      | 0    | 561  | 1181  |
| MSTRG. 16361. 6  | noncoding | -0. 03072   | 4155 | 4458 | 8011  |
| MSTRG. 16361. 7  | noncoding | -0. 008192  | 408  | 504  | 1617  |
| MSTRG. 16364. 2  | coding    | 0. 102      | 498  | 2454 | 4535  |
| MSTRG. 16366. 1  | coding    | 0. 345      | 141  | 879  | 1102  |
| MSTRG. 16369. 4  | coding    | 0. 05       | 732  | 1068 | 3380  |
| MSTRG. 16370. 1  | coding    | 0. 014      | 756  | 837  | 2701  |
| MSTRG. 16370. 2  | noncoding | -0. 0319488 | 903  | 993  | 1763  |
| MSTRG. 16375. 3  | coding    | 0. 044      | 792  | 1353 | 1633  |
| MSTRG. 16378. 1  | noncoding | -0. 04096   | 66   | 189  | 343   |
| MSTRG. 16388. 1  | noncoding | -0. 024576  | 1422 | 1503 | 2009  |
| MSTRG. 16389. 1  | coding    | 0. 002      | 8706 | 8811 | 14558 |
| MSTRG. 16389. 2  | noncoding | -0. 0446464 | 213  | 423  | 2125  |
| MSTRG. 16388. 2  | noncoding | -0. 159744  | 204  | 261  | 852   |
| MSTRG. 16397. 3  | coding    | 0. 013      | 1104 | 1773 | 3164  |
| MSTRG. 16399. 2  | coding    | 0. 298      | 0    | 276  | 2423  |
| MSTRG. 16410. 1  | noncoding | -0. 0004096 | 0    | 0    | 278   |
| MSTRG. 16418. 1  | noncoding | -0. 0815104 | 1305 | 1722 | 2009  |
| MSTRG. 16419. 6  | coding    | 0. 074      | 57   | 264  | 1730  |
| MSTRG. 16419. 5  | coding    | 0. 093      | 174  | 711  | 1839  |
| MSTRG. 16419. 7  | coding    | 0. 023      | 1338 | 4722 | 7045  |
| MSTRG. 16419. 8  | coding    | 0. 158      | 4119 | 4473 | 6795  |
| MSTRG. 16419. 10 | coding    | 0. 021      | 90   | 3342 | 5663  |
| MSTRG. 16422. 1  | coding    | 0. 259      | 345  | 1395 | 2017  |
| MSTRG. 16422. 2  | coding    | 0. 214      | 345  | 1725 | 2060  |
| MSTRG. 16422. 3  | coding    | 0. 259      | 345  | 1395 | 1702  |

|                  |           |             |      |      |       |
|------------------|-----------|-------------|------|------|-------|
| MSTRG. 16422. 6  | coding    | 0. 259      | 216  | 1266 | 1998  |
| MSTRG. 16423. 4  | noncoding | -0. 028672  | 1302 | 1545 | 4109  |
| MSTRG. 16423. 2  | coding    | 0. 048      | 2124 | 2871 | 3173  |
| MSTRG. 16423. 3  | coding    | 0. 048      | 1656 | 2403 | 2705  |
| MSTRG. 16423. 5  | noncoding | -0. 0835584 | 3060 | 3459 | 7208  |
| MSTRG. 16423. 7  | coding    | 0. 025      | 795  | 2697 | 2998  |
| MSTRG. 16423. 8  | coding    | 0. 048      | 3381 | 4128 | 4429  |
| MSTRG. 16423. 10 | noncoding | -0. 0835584 | 90   | 489  | 4919  |
| MSTRG. 16423. 12 | coding    | 0. 025      | 2124 | 3033 | 3748  |
| MSTRG. 16425. 2  | noncoding | -0. 045056  | 306  | 396  | 5988  |
| MSTRG. 16425. 1  | coding    | 0. 263      | 129  | 1572 | 6193  |
| MSTRG. 16425. 3  | coding    | 0. 278      | 129  | 1638 | 11317 |
| MSTRG. 16425. 9  | coding    | 0. 278      | 129  | 1641 | 2839  |
| MSTRG. 16425. 10 | coding    | 0. 278      | 249  | 1761 | 2054  |
| MSTRG. 16427. 1  | coding    | 0. 1        | 291  | 519  | 741   |
| MSTRG. 16417. 1  | noncoding | -0. 0974848 | 0    | 282  | 497   |
| MSTRG. 16429. 2  | noncoding | -0. 0536576 | 0    | 48   | 507   |
| MSTRG. 16431. 3  | coding    | 0. 225      | 348  | 1257 | 2022  |
| MSTRG. 16431. 4  | coding    | 0. 225      | 279  | 1188 | 1844  |
| MSTRG. 16470. 1  | coding    | 0. 105      | 4476 | 5490 | 7901  |
| MSTRG. 16472. 1  | noncoding | -0. 0053248 | 2505 | 2610 | 3431  |
| MSTRG. 16473. 2  | noncoding | -0. 0167936 | 204  | 369  | 893   |
| MSTRG. 16446. 1  | noncoding | -0. 0155648 | 114  | 279  | 433   |
| MSTRG. 16448. 5  | coding    | 0. 483      | 0    | 261  | 2791  |
| MSTRG. 16448. 6  | coding    | 0. 376      | 0    | 198  | 1617  |
| MSTRG. 16448. 2  | coding    | 0. 294      | 0    | 1206 | 2030  |
| MSTRG. 16448. 4  | coding    | 0. 294      | 0    | 1206 | 2037  |
| MSTRG. 16448. 8  | coding    | 0. 229      | 741  | 1053 | 11671 |
| MSTRG. 16448. 9  | coding    | 0. 274      | 1224 | 1746 | 8833  |
| MSTRG. 16452. 3  | coding    | 0. 434      | 369  | 4758 | 6509  |
| MSTRG. 16452. 5  | coding    | 0. 425      | 12   | 4539 | 6194  |
| MSTRG. 16452. 6  | coding    | 0. 424      | 777  | 5301 | 6928  |
| MSTRG. 16453. 2  | coding    | 0. 1        | 360  | 1446 | 4004  |
| MSTRG. 16457. 1  | coding    | 0. 273      | 0    | 1065 | 4206  |
| MSTRG. 16461. 2  | coding    | 0. 133      | 210  | 906  | 1098  |
| MSTRG. 16463. 2  | coding    | 0. 376      | 222  | 2115 | 2908  |
| MSTRG. 16463. 3  | coding    | 0. 307      | 0    | 2121 | 5542  |
| MSTRG. 16463. 4  | coding    | 0. 271      | 0    | 2118 | 5541  |
| MSTRG. 16464. 1  | noncoding | -0. 0114688 | 7854 | 8007 | 31071 |
| MSTRG. 16465. 1  | noncoding | -0. 008192  | 36   | 165  | 1125  |
| MSTRG. 16482. 1  | noncoding | -0. 0004096 | 0    | 3    | 520   |
| MSTRG. 16484. 1  | coding    | 0. 084      | 0    | 1869 | 2703  |
| MSTRG. 16486. 2  | coding    | 0. 045      | 243  | 1038 | 1861  |
| MSTRG. 16486. 3  | coding    | 0. 133      | 441  | 966  | 2912  |
| MSTRG. 16491. 1  | noncoding | -0. 0098304 | 486  | 639  | 1209  |
| MSTRG. 16492. 1  | noncoding | -0. 07168   | 0    | 36   | 566   |
| MSTRG. 16492. 2  | coding    | 0. 176      | 324  | 1134 | 1406  |
| MSTRG. 16498. 7  | noncoding | -0. 0626688 | 156  | 723  | 2732  |
| MSTRG. 16498. 8  | noncoding | -0. 0626688 | 156  | 723  | 2756  |
| MSTRG. 16498. 13 | noncoding | -0. 0630784 | 12   | 621  | 2775  |
| MSTRG. 16498. 14 | noncoding | -0. 0626688 | 156  | 723  | 2879  |
| MSTRG. 16498. 15 | noncoding | -0. 059392  | 156  | 759  | 2734  |
| MSTRG. 16498. 16 | coding    | 0. 001      | 48   | 225  | 624   |
| MSTRG. 16502. 2  | noncoding | -0. 0749568 | 0    | 90   | 634   |



|               |           |            |       |       |       |
|---------------|-----------|------------|-------|-------|-------|
| MSTRG.16507.1 | noncoding | -0.0004096 | 0     | 0     | 303   |
| MSTRG.16511.1 | coding    | 0.163      | 0     | 1482  | 2990  |
| MSTRG.16511.2 | coding    | 0.169      | 0     | 1479  | 2853  |
| MSTRG.16511.7 | coding    | 0.156      | 441   | 1794  | 2158  |
| MSTRG.16514.1 | coding    | 0.09       | 162   | 2136  | 2858  |
| MSTRG.16514.2 | coding    | 0.084      | 42    | 2091  | 2815  |
| MSTRG.16515.3 | coding    | 0.093      | 153   | 1266  | 2247  |
| MSTRG.16539.4 | coding    | 0.166      | 1830  | 3630  | 5561  |
| MSTRG.16539.5 | coding    | 0.144      | 312   | 2604  | 4535  |
| MSTRG.16539.2 | coding    | 0.107      | 1176  | 7224  | 9155  |
| MSTRG.16539.6 | coding    | 0.103      | 2742  | 8934  | 10865 |
| MSTRG.16539.7 | coding    | 0.07       | 1176  | 4902  | 5150  |
| MSTRG.16542.1 | noncoding | -0.110592  | 231   | 243   | 652   |
| MSTRG.16539.8 | coding    | 0.084      | 1176  | 3876  | 4445  |
| MSTRG.16565.1 | noncoding | -0.004096  | 90    | 180   | 1594  |
| MSTRG.16584.1 | noncoding | -0.004096  | 1056  | 1140  | 1663  |
| MSTRG.16584.2 | noncoding | -0.004096  | 2571  | 2655  | 3099  |
| MSTRG.16516.1 | coding    | 0.154      | 0     | 360   | 1339  |
| MSTRG.16520.1 | noncoding | -0.08192   | 801   | 882   | 3030  |
| MSTRG.16535.6 | coding    | 0.149      | 0     | 576   | 1453  |
| MSTRG.16535.7 | coding    | 0.025      | 1863  | 2013  | 3516  |
| MSTRG.16537.1 | noncoding | -0.0073728 | 3747  | 3900  | 4932  |
| MSTRG.16590.2 | coding    | 0.086      | 3804  | 4224  | 5784  |
| MSTRG.16590.4 | coding    | 0.055      | 231   | 699   | 4056  |
| MSTRG.16590.3 | coding    | 0.086      | 3789  | 4209  | 5732  |
| MSTRG.16590.6 | noncoding | -0.028672  | 4146  | 4263  | 4419  |
| MSTRG.16597.2 | coding    | 0.264      | 246   | 9237  | 10377 |
| MSTRG.16597.3 | coding    | 0.24       | 60    | 933   | 1332  |
| MSTRG.16597.4 | noncoding | -0.22528   | 714   | 771   | 927   |
| MSTRG.16597.5 | noncoding | -0.1462272 | 0     | 144   | 585   |
| MSTRG.16597.6 | noncoding | -0.1232896 | 0     | 93    | 914   |
| MSTRG.16613.1 | noncoding | -0.016384  | 348   | 423   | 1035  |
| MSTRG.16616.1 | coding    | 0.109      | 5058  | 5307  | 9321  |
| MSTRG.16616.2 | coding    | 0.109      | 10524 | 10773 | 14762 |
| MSTRG.16616.3 | coding    | 0.082      | 2121  | 2898  | 12960 |
| MSTRG.16619.1 | noncoding | -0.0004096 | 5955  | 6036  | 6746  |
| MSTRG.16620.1 | noncoding | -0.0290816 | 12621 | 12831 | 16497 |
| MSTRG.16616.5 | coding    | 0.066      | 807   | 1251  | 1407  |
| MSTRG.16616.6 | coding    | 0.072      | 2238  | 2688  | 2842  |
| MSTRG.16616.7 | coding    | 0.06       | 1752  | 2187  | 2342  |
| MSTRG.16616.8 | coding    | 0.06       | 4356  | 4791  | 4944  |
| MSTRG.16620.2 | noncoding | -0.0290816 | 12003 | 12213 | 27710 |
| MSTRG.16620.3 | noncoding | -0.0135168 | 30609 | 31155 | 41475 |
| MSTRG.16620.4 | noncoding | -0.0135168 | 22722 | 23268 | 32042 |
| MSTRG.16620.5 | noncoding | -0.0135168 | 48099 | 48645 | 57416 |
| MSTRG.16620.6 | noncoding | -0.0135168 | 45279 | 45825 | 54571 |
| MSTRG.16622.1 | noncoding | -0.067584  | 30    | 258   | 3789  |
| MSTRG.16587.1 | noncoding | -0.0364544 | 0     | 102   | 352   |
| MSTRG.16601.1 | noncoding | -0.0180224 | 2268  | 2763  | 3069  |
| MSTRG.16602.1 | noncoding | -0.02048   | 4065  | 4185  | 5489  |
| MSTRG.16603.3 | coding    | 0.16       | 1578  | 1842  | 2137  |
| MSTRG.16603.4 | coding    | 0.102      | 480   | 885   | 1181  |
| MSTRG.16604.2 | coding    | 0.438      | 0     | 498   | 2095  |
| MSTRG.16629.2 | coding    | 0.253      | 438   | 1029  | 2626  |

|                  |           |             |      |      |       |
|------------------|-----------|-------------|------|------|-------|
| MSTRG. 16629. 3  | coding    | 0. 253      | 759  | 1350 | 3670  |
| MSTRG. 16630. 1  | noncoding | -0. 016384  | 3987 | 4125 | 8817  |
| MSTRG. 16631. 3  | noncoding | -0. 0217088 | 6432 | 6849 | 11110 |
| MSTRG. 16629. 4  | coding    | 0. 253      | 303  | 894  | 2488  |
| MSTRG. 16629. 5  | coding    | 0. 253      | 1374 | 1965 | 4245  |
| MSTRG. 16632. 1  | noncoding | -0. 1593344 | 0    | 9    | 219   |
| MSTRG. 16642. 1  | coding    | 0. 343      | 306  | 2763 | 7191  |
| MSTRG. 16642. 2  | coding    | 0. 284      | 480  | 2160 | 6532  |
| MSTRG. 16644. 1  | coding    | 0. 444      | 12   | 1080 | 3753  |
| MSTRG. 16645. 2  | coding    | 0. 05       | 603  | 909  | 1179  |
| MSTRG. 16653. 5  | coding    | 0. 104      | 0    | 2295 | 2448  |
| MSTRG. 16653. 6  | coding    | 0. 111      | 0    | 2238 | 2391  |
| MSTRG. 16653. 7  | coding    | 0. 11       | 0    | 2481 | 2781  |
| MSTRG. 16653. 8  | coding    | 0. 114      | 0    | 2319 | 2619  |
| MSTRG. 16653. 9  | coding    | 0. 392      | 0    | 621  | 2777  |
| MSTRG. 16653. 10 | coding    | 0. 016      | 2904 | 3462 | 4163  |
| MSTRG. 16654. 1  | noncoding | -0. 008192  | 3351 | 3489 | 4363  |
| MSTRG. 16652. 1  | coding    | 0. 288      | 363  | 2322 | 4496  |
| MSTRG. 16660. 1  | noncoding | -0. 0712704 | 1563 | 2427 | 5024  |
| MSTRG. 16660. 3  | coding    | 0. 261      | 1866 | 2334 | 4138  |
| MSTRG. 16660. 4  | noncoding | -0. 0638976 | 45   | 1203 | 2913  |
| MSTRG. 16660. 5  | coding    | 0. 206      | 0    | 1332 | 1499  |
| MSTRG. 16665. 3  | coding    | 0. 125      | 1476 | 2508 | 5710  |
| MSTRG. 16665. 4  | coding    | 0. 125      | 2037 | 3069 | 6272  |
| MSTRG. 16671. 5  | noncoding | -0. 016384  | 516  | 567  | 855   |
| MSTRG. 16672. 2  | coding    | 0. 239      | 0    | 2247 | 2436  |
| MSTRG. 16672. 5  | coding    | 0. 257      | 435  | 2376 | 3562  |
| MSTRG. 16672. 7  | coding    | 0. 256      | 198  | 2133 | 2322  |
| MSTRG. 16669. 1  | noncoding | -0. 0495616 | 0    | 225  | 3778  |
| MSTRG. 16669. 2  | noncoding | -0. 077824  | 2595 | 2703 | 3032  |
| MSTRG. 16670. 1  | coding    | 0. 113      | 279  | 2907 | 3962  |
| MSTRG. 16674. 1  | noncoding | -0. 0724992 | 5364 | 5673 | 6253  |
| MSTRG. 16676. 1  | coding    | 0. 187      | 594  | 1443 | 2031  |
| MSTRG. 16676. 3  | coding    | 0. 174      | 0    | 1431 | 3759  |
| MSTRG. 16677. 4  | coding    | 0. 21       | 0    | 1164 | 2188  |
| MSTRG. 16677. 3  | coding    | 0. 172      | 0    | 1677 | 4097  |
| MSTRG. 16678. 1  | noncoding | -0. 012288  | 27   | 129  | 518   |
| MSTRG. 16679. 2  | noncoding | -0. 0708608 | 7242 | 7440 | 8231  |
| MSTRG. 16679. 1  | noncoding | -0. 0249856 | 0    | 1134 | 1926  |
| MSTRG. 16679. 3  | noncoding | -0. 0315392 | 7668 | 8007 | 8541  |
| MSTRG. 16679. 4  | noncoding | -0. 012288  | 753  | 894  | 1429  |
| MSTRG. 16679. 5  | noncoding | -0. 053248  | 717  | 918  | 1138  |
| MSTRG. 16685. 2  | coding    | 0. 532      | 459  | 2202 | 5776  |
| MSTRG. 16687. 1  | noncoding | -0. 06144   | 117  | 351  | 1419  |
| MSTRG. 16684. 1  | coding    | 0. 052      | 384  | 765  | 960   |
| MSTRG. 16691. 1  | noncoding | -0. 0434176 | 405  | 1005 | 2010  |
| MSTRG. 16694. 5  | noncoding | -0. 1114112 | 0    | 270  | 3508  |
| MSTRG. 16692. 1  | noncoding | -0. 0770048 | 0    | 228  | 384   |
| MSTRG. 16693. 1  | noncoding | -0. 0643072 | 0    | 309  | 555   |
| MSTRG. 16702. 1  | noncoding | -0. 0188416 | 7008 | 7164 | 10870 |
| MSTRG. 16702. 4  | coding    | 0. 307      | 0    | 444  | 2394  |
| MSTRG. 16702. 5  | noncoding | -0. 0004096 | 432  | 543  | 832   |
| MSTRG. 16704. 3  | noncoding | -0. 004096  | 114  | 288  | 547   |
| MSTRG. 16702. 10 | coding    | 0. 132      | 1128 | 2682 | 3850  |

|                  |           |             |      |      |       |
|------------------|-----------|-------------|------|------|-------|
| MSTRG. 16702. 12 | coding    | 0. 237      | 0    | 381  | 4665  |
| MSTRG. 16702. 13 | noncoding | -0. 0098304 | 3306 | 3453 | 3731  |
| MSTRG. 16709. 4  | coding    | 0. 397      | 306  | 3195 | 7931  |
| MSTRG. 16709. 7  | noncoding | -0. 0806912 | 0    | 162  | 3733  |
| MSTRG. 16696. 4  | coding    | 0. 332      | 7017 | 7665 | 9618  |
| MSTRG. 16712. 1  | coding    | 0. 127      | 261  | 4356 | 10394 |
| MSTRG. 16712. 2  | coding    | 0. 126      | 147  | 3981 | 10017 |
| MSTRG. 16712. 3  | coding    | 0. 127      | 264  | 4359 | 8223  |
| MSTRG. 16712. 5  | coding    | 0. 128      | 3204 | 7314 | 9483  |
| MSTRG. 16712. 4  | coding    | 0. 127      | 306  | 4401 | 6568  |
| MSTRG. 16712. 6  | coding    | 0. 126      | 234  | 4068 | 5869  |
| MSTRG. 16712. 7  | coding    | 0. 125      | 0    | 4308 | 6109  |
| MSTRG. 16712. 8  | coding    | 0. 128      | 348  | 4065 | 4884  |
| MSTRG. 16712. 9  | coding    | 0. 129      | 0    | 4344 | 4579  |
| MSTRG. 16712. 10 | coding    | 0. 129      | 0    | 4461 | 4694  |
| MSTRG. 16712. 11 | coding    | 0. 055      | 1038 | 2652 | 3670  |
| MSTRG. 16713. 1  | coding    | 0. 037      | 1197 | 1713 | 2620  |
| MSTRG. 16713. 2  | coding    | 0. 219      | 1671 | 2445 | 3174  |
| MSTRG. 16713. 4  | noncoding | -0. 094208  | 0    | 42   | 2642  |
| MSTRG. 16713. 11 | coding    | 0. 368      | 30   | 1287 | 13666 |
| MSTRG. 16719. 2  | coding    | 0. 189      | 0    | 4242 | 6215  |
| MSTRG. 16722. 1  | coding    | 0. 075      | 2187 | 3075 | 5600  |
| MSTRG. 16722. 2  | coding    | 0. 071      | 2253 | 3135 | 5255  |
| MSTRG. 16722. 3  | coding    | 0. 075      | 2190 | 3078 | 5138  |
| MSTRG. 16722. 5  | coding    | 0. 071      | 3894 | 4776 | 6550  |
| MSTRG. 16722. 6  | coding    | 0. 074      | 783  | 1260 | 6850  |
| MSTRG. 16726. 1  | noncoding | -0. 1024    | 828  | 912  | 1249  |
| MSTRG. 16733. 1  | noncoding | -0. 008192  | 351  | 468  | 1337  |
| MSTRG. 16733. 3  | coding    | 0. 03       | 168  | 582  | 1023  |
| MSTRG. 16745. 1  | noncoding | -0. 0331776 | 108  | 162  | 561   |
| MSTRG. 16747. 1  | noncoding | -0. 02048   | 63   | 81   | 497   |
| MSTRG. 16754. 2  | noncoding | -0. 04096   | 1701 | 1764 | 2039  |
| MSTRG. 16757. 3  | coding    | 0. 138      | 411  | 1686 | 2735  |
| MSTRG. 16757. 4  | coding    | 0. 138      | 288  | 1563 | 3088  |
| MSTRG. 16748. 2  | coding    | 0. 181      | 42   | 1125 | 2837  |
| MSTRG. 16749. 1  | noncoding | -0. 0380928 | 0    | 117  | 274   |
| MSTRG. 16749. 2  | noncoding | -0. 0520192 | 0    | 84   | 335   |
| MSTRG. 16750. 1  | noncoding | -0. 086016  | 252  | 354  | 691   |
| MSTRG. 16761. 3  | noncoding | -0. 0380928 | 282  | 348  | 1280  |
| MSTRG. 16764. 2  | coding    | 0. 153      | 1086 | 3021 | 4190  |
| MSTRG. 16765. 1  | coding    | 0. 02       | 1638 | 1743 | 2168  |
| MSTRG. 16766. 1  | noncoding | -0. 0176128 | 1308 | 1380 | 1793  |
| MSTRG. 16767. 1  | noncoding | -0. 036864  | 2202 | 2277 | 2482  |
| MSTRG. 16769. 1  | noncoding | -0. 0651264 | 1101 | 1107 | 2486  |
| MSTRG. 16772. 2  | coding    | 0. 155      | 0    | 3807 | 4586  |
| MSTRG. 16772. 3  | coding    | 0. 142      | 84   | 3798 | 4650  |
| MSTRG. 16772. 4  | coding    | 0. 14       | 81   | 3759 | 4583  |
| MSTRG. 16772. 5  | coding    | 0. 142      | 147  | 3840 | 4617  |
| MSTRG. 16776. 1  | noncoding | -0. 0004096 | 57   | 177  | 530   |
| MSTRG. 16799. 10 | coding    | 0. 129      | 2766 | 5601 | 6535  |
| MSTRG. 16799. 7  | coding    | 0. 128      | 2790 | 5634 | 6569  |
| MSTRG. 16799. 8  | coding    | 0. 129      | 3078 | 5913 | 6848  |
| MSTRG. 16799. 9  | coding    | 0. 129      | 3126 | 5961 | 6895  |
| MSTRG. 16799. 3  | coding    | 0. 128      | 3312 | 6156 | 7089  |

|                  |           |             |       |       |       |
|------------------|-----------|-------------|-------|-------|-------|
| MSTRG. 16799. 2  | coding    | 0. 085      | 708   | 11157 | 14952 |
| MSTRG. 16799. 11 | coding    | 0. 095      | 0     | 10857 | 14652 |
| MSTRG. 16799. 4  | coding    | 0. 095      | 72    | 10980 | 14783 |
| MSTRG. 16799. 5  | coding    | 0. 094      | 72    | 11088 | 14882 |
| MSTRG. 16799. 1  | coding    | 0. 095      | 0     | 11040 | 14845 |
| MSTRG. 16801. 1  | noncoding | -0. 0004096 | 0     | 0     | 2241  |
| MSTRG. 16799. 12 | coding    | 0. 206      | 3348  | 3798  | 4549  |
| MSTRG. 16799. 13 | coding    | 0. 059      | 1203  | 4929  | 5332  |
| MSTRG. 16802. 1  | noncoding | -0. 098304  | 912   | 996   | 1751  |
| MSTRG. 16803. 1  | noncoding | -0. 0339968 | 174   | 507   | 1257  |
| MSTRG. 16780. 1  | noncoding | -0. 0004096 | 0     | 0     | 235   |
| MSTRG. 16784. 2  | coding    | 0. 173      | 327   | 1674  | 2759  |
| MSTRG. 16785. 1  | noncoding | -0. 0004096 | 0     | 0     | 230   |
| MSTRG. 16787. 1  | noncoding | -0. 0004096 | 0     | 0     | 214   |
| MSTRG. 16789. 1  | noncoding | -0. 0004096 | 0     | 0     | 278   |
| MSTRG. 16823. 10 | coding    | 0. 032      | 99    | 2625  | 6335  |
| MSTRG. 16823. 8  | coding    | 0. 032      | 114   | 2640  | 6346  |
| MSTRG. 16823. 1  | coding    | 0. 039      | 75    | 3291  | 7000  |
| MSTRG. 16823. 5  | coding    | 0. 041      | 75    | 3252  | 6961  |
| MSTRG. 16823. 6  | coding    | 0. 041      | 75    | 3261  | 6967  |
| MSTRG. 16823. 7  | coding    | 0. 037      | 75    | 3363  | 7069  |
| MSTRG. 16823. 9  | coding    | 0. 034      | 75    | 3276  | 5832  |
| MSTRG. 16823. 2  | coding    | 0. 041      | 75    | 3261  | 6971  |
| MSTRG. 16823. 3  | coding    | 0. 038      | 78    | 3336  | 7044  |
| MSTRG. 16823. 11 | coding    | 0. 037      | 75    | 3363  | 6265  |
| MSTRG. 16823. 12 | noncoding | -0. 075776  | 1467  | 1662  | 3149  |
| MSTRG. 16824. 1  | noncoding | -0. 063488  | 0     | 483   | 873   |
| MSTRG. 16824. 2  | noncoding | -0. 0745472 | 0     | 546   | 1614  |
| MSTRG. 16824. 3  | noncoding | -0. 0733184 | 0     | 537   | 1082  |
| MSTRG. 16816. 2  | coding    | 0. 133      | 0     | 630   | 3154  |
| MSTRG. 16816. 3  | coding    | 0. 14       | 147   | 633   | 3156  |
| MSTRG. 16817. 1  | noncoding | -0. 0012288 | 1623  | 1785  | 2135  |
| MSTRG. 16818. 1  | noncoding | -0. 0004096 | 1506  | 1692  | 2815  |
| MSTRG. 16818. 2  | noncoding | -0. 155648  | 57    | 78    | 830   |
| MSTRG. 16820. 1  | noncoding | -0. 057344  | 417   | 516   | 741   |
| MSTRG. 16835. 1  | noncoding | -0. 0004096 | 0     | 0     | 235   |
| MSTRG. 16835. 2  | noncoding | -0. 0004096 | 0     | 0     | 275   |
| MSTRG. 16840. 1  | noncoding | -0. 0929792 | 3891  | 4314  | 6151  |
| MSTRG. 16847. 1  | noncoding | -0. 0294912 | 612   | 846   | 1001  |
| MSTRG. 16847. 2  | noncoding | -0. 0212992 | 147   | 330   | 484   |
| MSTRG. 16855. 1  | noncoding | -0. 16384   | 282   | 309   | 641   |
| MSTRG. 16878. 1  | noncoding | -0. 028672  | 72    | 87    | 337   |
| MSTRG. 16879. 1  | noncoding | -0. 1835008 | 0     | 36    | 237   |
| MSTRG. 16884. 1  | noncoding | -0. 022528  | 21    | 180   | 1462  |
| MSTRG. 17027. 1  | coding    | 0. 154      | 204   | 1869  | 8577  |
| MSTRG. 17027. 4  | coding    | 0. 161      | 198   | 1512  | 12607 |
| MSTRG. 17027. 5  | coding    | 0. 153      | 198   | 1635  | 8911  |
| MSTRG. 17027. 3  | coding    | 0. 144      | 198   | 1800  | 3694  |
| MSTRG. 17027. 6  | coding    | 0. 149      | 192   | 1821  | 10959 |
| MSTRG. 17028. 1  | coding    | 0. 086      | 1008  | 1191  | 3864  |
| MSTRG. 17027. 8  | coding    | 0. 133      | 25944 | 27093 | 29632 |
| MSTRG. 17027. 12 | coding    | 0. 115      | 1656  | 2811  | 5170  |
| MSTRG. 17027. 13 | coding    | 0. 149      | 624   | 1866  | 4339  |
| MSTRG. 17027. 20 | coding    | 0. 163      | 2247  | 3099  | 4431  |

|                  |           |             |       |       |       |
|------------------|-----------|-------------|-------|-------|-------|
| MSTRG. 17027. 16 | coding    | 0. 137      | 315   | 1158  | 21252 |
| MSTRG. 17027. 17 | coding    | 0. 148      | 9810  | 10677 | 16054 |
| MSTRG. 17027. 21 | coding    | 0. 146      | 3933  | 4875  | 8258  |
| MSTRG. 17027. 22 | coding    | 0. 178      | 32298 | 32976 | 34059 |
| MSTRG. 17027. 23 | noncoding | -0. 08192   | 2487  | 2529  | 4062  |
| MSTRG. 17031. 1  | noncoding | -0. 0262144 | 3195  | 3279  | 14391 |
| MSTRG. 17027. 24 | coding    | 0. 165      | 3150  | 3846  | 6689  |
| MSTRG. 17027. 25 | coding    | 0. 12       | 129   | 1272  | 3631  |
| MSTRG. 17027. 26 | coding    | 0. 063      | 7515  | 8109  | 19184 |
| MSTRG. 17027. 27 | coding    | 0. 063      | 4920  | 5514  | 14006 |
| MSTRG. 17027. 28 | noncoding | -0. 008192  | 2109  | 2202  | 2641  |
| MSTRG. 17033. 1  | noncoding | -0. 0004096 | 0     | 0     | 1679  |
| MSTRG. 17027. 29 | noncoding | -0. 090112  | 1545  | 1620  | 9257  |
| MSTRG. 17027. 30 | noncoding | -0. 036864  | 1233  | 1338  | 7910  |
| MSTRG. 17034. 1  | noncoding | -0. 053248  | 333   | 405   | 11327 |
| MSTRG. 17035. 1  | noncoding | -0. 036864  | 2874  | 2961  | 3445  |
| MSTRG. 17036. 1  | noncoding | -0. 0249856 | 6750  | 6825  | 12077 |
| MSTRG. 17037. 1  | noncoding | -0. 032768  | 2034  | 2139  | 2973  |
| MSTRG. 17038. 1  | noncoding | -0. 008192  | 129   | 234   | 4062  |
| MSTRG. 17039. 1  | coding    | 0. 02       | 1389  | 1482  | 7025  |
| MSTRG. 17040. 1  | noncoding | -0. 049152  | 132   | 231   | 2726  |
| MSTRG. 17041. 1  | coding    | 0. 023      | 5307  | 5487  | 9233  |
| MSTRG. 17042. 1  | noncoding | -0. 049152  | 2013  | 2100  | 2598  |
| MSTRG. 17042. 2  | coding    | 0. 078      | 1398  | 1770  | 5725  |
| MSTRG. 17027. 31 | noncoding | -0. 053248  | 3816  | 3840  | 4277  |
| MSTRG. 17027. 32 | noncoding | -0. 0651264 | 6141  | 6483  | 25720 |
| MSTRG. 17027. 34 | coding    | 0. 04       | 21348 | 22314 | 30300 |
| MSTRG. 17027. 33 | noncoding | -0. 077824  | 17493 | 17583 | 23637 |
| MSTRG. 17027. 35 | noncoding | -0. 0004096 | 0     | 0     | 489   |
| MSTRG. 17027. 37 | coding    | 0. 085      | 10497 | 10761 | 25677 |
| MSTRG. 17027. 36 | coding    | 0. 086      | 5433  | 5574  | 9163  |
| MSTRG. 17027. 38 | coding    | 0. 04       | 6867  | 7833  | 12520 |
| MSTRG. 17027. 40 | coding    | 0. 04       | 6552  | 8079  | 9537  |
| MSTRG. 17027. 39 | noncoding | -0. 053248  | 9249  | 9339  | 9760  |
| MSTRG. 17027. 41 | coding    | 0. 085      | 4200  | 4464  | 13188 |
| MSTRG. 17027. 42 | coding    | 0. 085      | 4161  | 4425  | 7632  |
| MSTRG. 17027. 43 | noncoding | -0. 012288  | 6045  | 6180  | 9410  |
| MSTRG. 17027. 44 | noncoding | -0. 131072  | 3381  | 3450  | 4906  |
| MSTRG. 17044. 1  | noncoding | -0. 557056  | 3285  | 3291  | 4513  |
| MSTRG. 17027. 45 | noncoding | -0. 026624  | 4593  | 4698  | 9382  |
| MSTRG. 17027. 46 | coding    | 0. 086      | 4734  | 4875  | 6387  |
| MSTRG. 17045. 1  | noncoding | -0. 090112  | 3135  | 3177  | 5245  |
| MSTRG. 17046. 1  | noncoding | -0. 0200704 | 1557  | 1596  | 3780  |
| MSTRG. 17047. 1  | noncoding | -0. 0323584 | 5793  | 5988  | 12441 |
| MSTRG. 17048. 1  | noncoding | -0. 0319488 | 1848  | 1884  | 4629  |
| MSTRG. 17049. 1  | noncoding | -0. 065536  | 300   | 312   | 891   |
| MSTRG. 17050. 1  | noncoding | -0. 008192  | 612   | 672   | 3230  |
| MSTRG. 17051. 1  | noncoding | -0. 1024    | 2232  | 2262  | 4105  |
| MSTRG. 16890. 1  | coding    | 0. 357      | 519   | 2184  | 3377  |
| MSTRG. 16890. 2  | coding    | 0. 284      | 72    | 741   | 896   |
| MSTRG. 16899. 2  | coding    | 0. 134      | 1275  | 4269  | 5677  |
| MSTRG. 16906. 1  | coding    | 0. 075      | 0     | 3366  | 3590  |
| MSTRG. 16906. 3  | coding    | 0. 037      | 57    | 567   | 844   |
| MSTRG. 16907. 3  | coding    | 0. 168      | 474   | 735   | 2346  |

|                 |           |             |      |      |       |
|-----------------|-----------|-------------|------|------|-------|
| MSTRG. 16907. 1 | coding    | 0. 142      | 474  | 903  | 2065  |
| MSTRG. 16907. 2 | noncoding | -0. 034816  | 1104 | 2076 | 7217  |
| MSTRG. 16907. 4 | noncoding | -0. 034816  | 1101 | 2073 | 7214  |
| MSTRG. 16907. 5 | noncoding | -0. 0434176 | 3108 | 3291 | 5076  |
| MSTRG. 16907. 6 | coding    | 0. 143      | 294  | 594  | 5504  |
| MSTRG. 16907. 8 | coding    | 0. 142      | 819  | 1248 | 2481  |
| MSTRG. 16907. 7 | noncoding | -0. 034816  | 2691 | 3663 | 8708  |
| MSTRG. 16907. 9 | noncoding | -0. 024576  | 1860 | 1935 | 3211  |
| MSTRG. 16911. 1 | noncoding | -0. 0126976 | 357  | 393  | 1209  |
| MSTRG. 16912. 1 | coding    | 0. 151      | 2139 | 2385 | 4070  |
| MSTRG. 16915. 1 | coding    | 0. 09       | 75   | 2913 | 3860  |
| MSTRG. 16918. 2 | coding    | 0. 01       | 309  | 450  | 1088  |
| MSTRG. 16918. 1 | coding    | 0. 01       | 309  | 450  | 1677  |
| MSTRG. 16912. 2 | coding    | 0. 061      | 240  | 1827 | 2157  |
| MSTRG. 16912. 3 | coding    | 0. 049      | 48   | 1587 | 1915  |
| MSTRG. 16902. 3 | coding    | 0. 178      | 0    | 735  | 2260  |
| MSTRG. 16902. 4 | coding    | 0. 171      | 0    | 735  | 2260  |
| MSTRG. 16919. 1 | noncoding | -0. 0004096 | 0    | 0    | 330   |
| MSTRG. 16920. 1 | noncoding | -0. 008192  | 867  | 1002 | 2288  |
| MSTRG. 16922. 1 | noncoding | -0. 151552  | 216  | 258  | 530   |
| MSTRG. 16930. 6 | coding    | 0. 263      | 456  | 3036 | 3376  |
| MSTRG. 16927. 1 | coding    | 0. 248      | 117  | 1086 | 1518  |
| MSTRG. 16928. 1 | noncoding | -0. 0446464 | 3    | 39   | 291   |
| MSTRG. 16935. 7 | coding    | 0. 186      | 1386 | 1965 | 2495  |
| MSTRG. 16936. 1 | noncoding | -0. 03072   | 6447 | 6747 | 15963 |
| MSTRG. 16935. 8 | coding    | 0. 186      | 1371 | 1953 | 2574  |
| MSTRG. 16938. 1 | noncoding | -0. 0221184 | 3363 | 3531 | 4193  |
| MSTRG. 16940. 1 | coding    | 0. 563      | 0    | 480  | 2199  |
| MSTRG. 16940. 2 | coding    | 0. 594      | 0    | 438  | 2155  |
| MSTRG. 16940. 3 | noncoding | -0. 3407872 | 0    | 279  | 3249  |
| MSTRG. 16940. 4 | noncoding | -0. 3616768 | 0    | 219  | 5668  |
| MSTRG. 16945. 1 | coding    | 0. 162      | 438  | 3726 | 8493  |
| MSTRG. 16948. 1 | noncoding | -0. 004096  | 4521 | 4626 | 5733  |
| MSTRG. 16949. 2 | coding    | 0. 378      | 288  | 1194 | 5161  |
| MSTRG. 16953. 4 | coding    | 0. 308      | 0    | 6144 | 7369  |
| MSTRG. 16954. 1 | noncoding | -0. 0065536 | 1917 | 2076 | 2783  |
| MSTRG. 16959. 1 | coding    | 0. 151      | 0    | 1383 | 2474  |
| MSTRG. 16959. 2 | coding    | 0. 139      | 105  | 1230 | 2321  |
| MSTRG. 16961. 1 | noncoding | -0. 0417792 | 480  | 828  | 6532  |
| MSTRG. 16962. 1 | noncoding | -0. 077824  | 78   | 126  | 827   |
| MSTRG. 16965. 1 | coding    | 0. 196      | 405  | 1266 | 2682  |
| MSTRG. 16965. 2 | coding    | 0. 218      | 84   | 987  | 2402  |
| MSTRG. 16965. 4 | noncoding | -0. 016384  | 2661 | 2784 | 3070  |
| MSTRG. 16965. 3 | coding    | 0. 239      | 0    | 930  | 5265  |
| MSTRG. 16965. 5 | coding    | 0. 157      | 51   | 561  | 3710  |
| MSTRG. 16965. 6 | coding    | 0. 245      | 0    | 813  | 3146  |
| MSTRG. 16965. 7 | coding    | 0. 264      | 0    | 369  | 584   |
| MSTRG. 16966. 1 | coding    | 0. 04       | 7929 | 8691 | 19197 |
| MSTRG. 16966. 2 | coding    | 0. 107      | 7914 | 8265 | 15722 |
| MSTRG. 16967. 1 | noncoding | -0. 014336  | 864  | 1035 | 1707  |
| MSTRG. 16968. 1 | noncoding | -0. 0073728 | 228  | 762  | 1441  |
| MSTRG. 16963. 5 | noncoding | -0. 045056  | 0    | 165  | 319   |
| MSTRG. 16971. 1 | coding    | 0. 17       | 438  | 2403 | 2792  |
| MSTRG. 16971. 2 | coding    | 0. 146      | 432  | 2256 | 2644  |

|                  |           |             |      |       |       |
|------------------|-----------|-------------|------|-------|-------|
| MSTRG. 16971. 3  | coding    | 0. 146      | 309  | 2133  | 2522  |
| MSTRG. 16971. 4  | coding    | 0. 169      | 309  | 1383  | 2772  |
| MSTRG. 16971. 6  | coding    | 0. 146      | 0    | 1983  | 2509  |
| MSTRG. 16971. 8  | coding    | 0. 096      | 111  | 1506  | 1895  |
| MSTRG. 16971. 10 | coding    | 0. 139      | 1263 | 2016  | 2405  |
| MSTRG. 16971. 9  | coding    | 0. 131      | 99   | 1635  | 2024  |
| MSTRG. 16973. 1  | noncoding | -0. 0139264 | 852  | 1023  | 1442  |
| MSTRG. 16974. 2  | coding    | 0. 465      | 462  | 1110  | 1618  |
| MSTRG. 16974. 3  | coding    | 0. 465      | 525  | 1173  | 1682  |
| MSTRG. 16978. 1  | coding    | 0. 291      | 363  | 2319  | 3960  |
| MSTRG. 16978. 2  | coding    | 0. 23       | 144  | 3702  | 5342  |
| MSTRG. 16978. 3  | coding    | 0. 335      | 2250 | 3831  | 5468  |
| MSTRG. 16978. 4  | coding    | 0. 225      | 0    | 3702  | 5337  |
| MSTRG. 16988. 6  | coding    | 0. 043      | 5628 | 7983  | 10549 |
| MSTRG. 16988. 4  | coding    | 0. 036      | 3378 | 8817  | 26720 |
| MSTRG. 16988. 5  | coding    | 0. 036      | 4722 | 10161 | 28289 |
| MSTRG. 16988. 3  | coding    | 0. 036      | 2262 | 7701  | 25827 |
| MSTRG. 16988. 9  | coding    | 0. 001      | 141  | 411   | 898   |
| MSTRG. 16992. 2  | coding    | 0. 191      | 0    | 1275  | 1496  |
| MSTRG. 16996. 1  | noncoding | -0. 024576  | 33   | 123   | 438   |
| MSTRG. 16997. 1  | noncoding | -0. 0233472 | 285  | 291   | 649   |
| MSTRG. 16997. 2  | noncoding | -0. 0004096 | 0    | 0     | 279   |
| MSTRG. 16998. 1  | noncoding | -0. 06144   | 753  | 861   | 2308  |
| MSTRG. 16999. 1  | noncoding | -0. 0466944 | 972  | 1032  | 1187  |
| MSTRG. 17005. 1  | noncoding | -0. 0475136 | 0    | 3     | 611   |
| MSTRG. 17004. 6  | noncoding | -0. 0290816 | 438  | 624   | 826   |
| MSTRG. 17004. 7  | noncoding | -0. 0290816 | 723  | 909   | 1111  |
| MSTRG. 17004. 8  | noncoding | -0. 0290816 | 429  | 615   | 817   |
| MSTRG. 17008. 1  | noncoding | -0. 024576  | 111  | 183   | 431   |
| MSTRG. 17011. 2  | coding    | 0. 563      | 111  | 738   | 5041  |
| MSTRG. 17011. 3  | coding    | 0. 556      | 111  | 750   | 1847  |
| MSTRG. 17011. 5  | coding    | 0. 556      | 111  | 750   | 1162  |
| MSTRG. 17012. 1  | noncoding | -0. 1429504 | 0    | 765   | 2325  |
| MSTRG. 17012. 2  | noncoding | -0. 1429504 | 0    | 765   | 2195  |
| MSTRG. 17016. 1  | noncoding | -0. 0004096 | 144  | 258   | 689   |
| MSTRG. 17053. 2  | noncoding | -0. 1110016 | 0    | 180   | 689   |
| MSTRG. 17053. 1  | noncoding | -0. 0528384 | 63   | 369   | 649   |
| MSTRG. 17054. 1  | coding    | 0. 296      | 0    | 5796  | 6634  |
| MSTRG. 17054. 2  | coding    | 0. 311      | 243  | 5235  | 7205  |
| MSTRG. 17055. 1  | noncoding | -0. 0008192 | 588  | 834   | 1153  |
| MSTRG. 17054. 3  | coding    | 0. 377      | 0    | 1947  | 4543  |
| MSTRG. 17060. 1  | noncoding | -0. 004096  | 0    | 39    | 655   |
| MSTRG. 17061. 1  | noncoding | -0. 0630784 | 27   | 300   | 5115  |
| MSTRG. 17061. 2  | noncoding | -0. 0524288 | 81   | 462   | 3638  |
| MSTRG. 17067. 1  | noncoding | -0. 0086016 | 465  | 600   | 753   |
| MSTRG. 17067. 2  | noncoding | -0. 0274432 | 690  | 1659  | 1815  |
| MSTRG. 17066. 2  | coding    | 0. 256      | 171  | 4098  | 4947  |
| MSTRG. 17069. 1  | coding    | 0. 385      | 1230 | 2016  | 2315  |
| MSTRG. 17069. 2  | coding    | 0. 439      | 0    | 684   | 980   |
| MSTRG. 17074. 2  | coding    | 0. 428      | 468  | 1167  | 2302  |
| MSTRG. 17074. 4  | coding    | 0. 505      | 0    | 1065  | 2070  |
| MSTRG. 17074. 6  | coding    | 0. 496      | 0    | 945   | 1949  |
| MSTRG. 17076. 1  | coding    | 0. 511      | 0    | 1488  | 6949  |
| MSTRG. 17076. 4  | coding    | 0. 503      | 1497 | 2880  | 3056  |

|                 |           |             |      |      |       |
|-----------------|-----------|-------------|------|------|-------|
| MSTRG. 17076. 6 | coding    | 0. 343      | 24   | 2385 | 2559  |
| MSTRG. 17077. 1 | coding    | 0. 533      | 18   | 1089 | 1310  |
| MSTRG. 17078. 5 | noncoding | -0. 116736  | 972  | 1344 | 7995  |
| MSTRG. 17078. 1 | coding    | 0. 21       | 4902 | 5736 | 6902  |
| MSTRG. 17079. 1 | noncoding | -0. 0520192 | 8022 | 8421 | 9076  |
| MSTRG. 17078. 6 | coding    | 0. 285      | 21   | 528  | 10917 |
| MSTRG. 17085. 2 | noncoding | -0. 1081344 | 0    | 171  | 3101  |
| MSTRG. 17087. 3 | coding    | 0. 341      | 5496 | 7374 | 9597  |
| MSTRG. 17087. 4 | coding    | 0. 341      | 1425 | 3303 | 5501  |
| MSTRG. 17092. 1 | noncoding | -0. 034816  | 141  | 957  | 1112  |
| MSTRG. 17093. 1 | noncoding | -0. 0434176 | 366  | 984  | 1633  |
| MSTRG. 17093. 2 | noncoding | -0. 0454656 | 1308 | 1788 | 1943  |
| MSTRG. 17093. 3 | noncoding | -0. 059392  | 900  | 1131 | 1286  |
| MSTRG. 17093. 4 | noncoding | -0. 0421888 | 1161 | 1623 | 1779  |
| MSTRG. 17093. 5 | noncoding | -0. 0475136 | 189  | 777  | 1402  |
| MSTRG. 17096. 2 | coding    | 0. 463      | 516  | 2961 | 3780  |
| MSTRG. 17096. 3 | coding    | 0. 487      | 2010 | 3243 | 3416  |
| MSTRG. 17101. 1 | coding    | 0. 431      | 0    | 3993 | 6844  |
| MSTRG. 17105. 1 | noncoding | -0. 0344064 | 165  | 516  | 945   |
| MSTRG. 17109. 4 | coding    | 0. 294      | 30   | 1176 | 1331  |
| MSTRG. 17109. 2 | coding    | 0. 451      | 432  | 2391 | 2552  |
| MSTRG. 17109. 5 | coding    | 0. 458      | 168  | 1293 | 1446  |
| MSTRG. 17111. 3 | coding    | 0. 417      | 0    | 1332 | 1498  |
| MSTRG. 17114. 1 | noncoding | -0. 0536576 | 6186 | 6762 | 6916  |
| MSTRG. 17114. 2 | noncoding | -0. 0724992 | 1317 | 2070 | 2225  |
| MSTRG. 17115. 2 | coding    | 0. 491      | 0    | 1254 | 1606  |
| MSTRG. 17110. 3 | noncoding | -0. 0700416 | 0    | 3759 | 5070  |
| MSTRG. 17110. 1 | coding    | 0. 36       | 0    | 603  | 1922  |
| MSTRG. 17110. 2 | noncoding | -0. 1298432 | 0    | 1674 | 2993  |
| MSTRG. 17110. 4 | noncoding | -0. 1118208 | 0    | 3159 | 4562  |
| MSTRG. 17110. 5 | noncoding | -0. 11264   | 0    | 3339 | 4742  |
| MSTRG. 17110. 6 | noncoding | -0. 1097728 | 0    | 3648 | 4790  |
| MSTRG. 17116. 1 | coding    | 0. 453      | 1419 | 2301 | 2653  |
| MSTRG. 17117. 1 | coding    | 0. 483      | 348  | 2334 | 2720  |
| MSTRG. 17117. 3 | coding    | 0. 483      | 342  | 2328 | 2669  |
| MSTRG. 17119. 2 | coding    | 0. 431      | 138  | 1548 | 2395  |
| MSTRG. 17119. 3 | coding    | 0. 431      | 120  | 1530 | 2377  |
| MSTRG. 17119. 5 | coding    | 0. 431      | 150  | 1560 | 2408  |
| MSTRG. 17131. 1 | coding    | 0. 462      | 105  | 1464 | 1620  |
| MSTRG. 17138. 2 | noncoding | -0. 0589824 | 153  | 786  | 1334  |
| MSTRG. 17138. 3 | coding    | 0. 287      | 4821 | 6162 | 7216  |
| MSTRG. 17138. 4 | coding    | 0. 324      | 6102 | 6981 | 7567  |
| MSTRG. 17138. 6 | coding    | 0. 333      | 4497 | 5529 | 5902  |
| MSTRG. 17140. 2 | noncoding | -0. 0290816 | 195  | 1224 | 1720  |
| MSTRG. 17134. 1 | coding    | 0. 317      | 0    | 939  | 5919  |
| MSTRG. 17134. 2 | noncoding | -0. 1712128 | 639  | 975  | 5079  |
| MSTRG. 17145. 1 | noncoding | -0. 028672  | 69   | 150  | 327   |
| MSTRG. 17150. 1 | noncoding | -0. 012288  | 432  | 567  | 722   |
| MSTRG. 17150. 2 | noncoding | -0. 0172032 | 552  | 624  | 777   |
| MSTRG. 17151. 4 | coding    | 0. 147      | 1059 | 2580 | 2852  |
| MSTRG. 17152. 2 | coding    | 0. 259      | 60   | 333  | 1136  |
| MSTRG. 17155. 1 | noncoding | -0. 079872  | 6780 | 7281 | 7438  |
| MSTRG. 17155. 4 | noncoding | -0. 0516096 | 3423 | 3951 | 5601  |
| MSTRG. 17166. 1 | noncoding | -0. 0180224 | 837  | 1053 | 2655  |



|                  |           |             |       |       |       |
|------------------|-----------|-------------|-------|-------|-------|
| MSTRG. 17166. 2  | noncoding | -0. 016384  | 207   | 264   | 455   |
| MSTRG. 17168. 2  | noncoding | -0. 1425408 | 0     | 417   | 4240  |
| MSTRG. 17168. 3  | coding    | 0. 459      | 20556 | 22158 | 25115 |
| MSTRG. 17158. 1  | noncoding | -0. 151552  | 207   | 273   | 533   |
| MSTRG. 17172. 2  | coding    | 0. 123      | 21    | 495   | 1249  |
| MSTRG. 17172. 3  | coding    | 0. 089      | 21    | 444   | 1394  |
| MSTRG. 17192. 2  | coding    | 0. 213      | 1449  | 1779  | 2081  |
| MSTRG. 17192. 1  | coding    | 0. 073      | 291   | 1962  | 2264  |
| MSTRG. 17192. 3  | coding    | 0. 213      | 1614  | 1944  | 2244  |
| MSTRG. 17192. 4  | coding    | 0. 073      | 765   | 2436  | 2736  |
| MSTRG. 17193. 1  | noncoding | -0. 0466944 | 0     | 387   | 1141  |
| MSTRG. 17202. 1  | noncoding | -0. 016384  | 1911  | 2001  | 4118  |
| MSTRG. 17207. 1  | noncoding | -0. 126976  | 750   | 801   | 1630  |
| MSTRG. 17215. 2  | noncoding | -0. 008192  | 1662  | 1800  | 2253  |
| MSTRG. 17225. 1  | noncoding | -0. 0004096 | 117   | 312   | 836   |
| MSTRG. 17175. 1  | noncoding | -0. 172032  | 144   | 183   | 452   |
| MSTRG. 17175. 2  | noncoding | -0. 073728  | 144   | 222   | 612   |
| MSTRG. 17176. 1  | noncoding | -0. 073728  | 21    | 51    | 264   |
| MSTRG. 17177. 4  | coding    | 0. 532      | 3213  | 5448  | 6506  |
| MSTRG. 17177. 3  | coding    | 0. 498      | 78    | 2790  | 3848  |
| MSTRG. 17177. 2  | coding    | 0. 415      | 0     | 3975  | 5033  |
| MSTRG. 17177. 5  | coding    | 0. 457      | 141   | 3087  | 4046  |
| MSTRG. 17177. 6  | coding    | 0. 483      | 234   | 3057  | 3934  |
| MSTRG. 17178. 1  | coding    | 0. 074      | 1998  | 2709  | 3289  |
| MSTRG. 17178. 2  | coding    | 0. 105      | 12    | 306   | 2137  |
| MSTRG. 17177. 7  | coding    | 0. 242      | 0     | 1692  | 2364  |
| MSTRG. 17179. 1  | noncoding | -0. 135168  | 2730  | 2775  | 2931  |
| MSTRG. 17180. 1  | noncoding | -0. 0069632 | 0     | 309   | 1053  |
| MSTRG. 17398. 2  | coding    | 0. 067      | 168   | 765   | 1113  |
| MSTRG. 17399. 1  | noncoding | -0. 0540672 | 297   | 507   | 660   |
| MSTRG. 17400. 1  | noncoding | -0. 016384  | 834   | 933   | 1615  |
| MSTRG. 17401. 1  | noncoding | -0. 1232896 | 0     | 369   | 526   |
| MSTRG. 17402. 1  | noncoding | -0. 0585728 | 3849  | 4068  | 4223  |
| MSTRG. 17402. 2  | noncoding | -0. 02048   | 264   | 354   | 1441  |
| MSTRG. 17402. 3  | noncoding | -0. 004096  | 1656  | 1821  | 2095  |
| MSTRG. 17402. 5  | noncoding | -0. 0049152 | 135   | 300   | 521   |
| MSTRG. 17402. 6  | noncoding | -0. 0008192 | 138   | 285   | 561   |
| MSTRG. 17402. 11 | noncoding | -0. 0098304 | 846   | 1110  | 7397  |
| MSTRG. 17403. 1  | noncoding | -0. 065536  | 540   | 699   | 1793  |
| MSTRG. 17402. 13 | noncoding | -0. 0688128 | 3057  | 3366  | 4354  |
| MSTRG. 17405. 1  | noncoding | -0. 0356352 | 3612  | 3882  | 4446  |
| MSTRG. 17402. 14 | noncoding | -0. 0315392 | 1131  | 1338  | 3957  |
| MSTRG. 17402. 15 | coding    | 0. 455      | 129   | 2595  | 3766  |
| MSTRG. 17402. 16 | noncoding | -0. 1462272 | 2094  | 2514  | 5070  |
| MSTRG. 17402. 19 | coding    | 0. 138      | 201   | 1998  | 4523  |
| MSTRG. 17402. 17 | coding    | 0. 215      | 201   | 663   | 1924  |
| MSTRG. 17402. 20 | coding    | 0. 166      | 201   | 1038  | 3383  |
| MSTRG. 17402. 21 | coding    | 0. 166      | 105   | 942   | 2352  |
| MSTRG. 17402. 24 | coding    | 0. 156      | 3462  | 5073  | 5554  |
| MSTRG. 17402. 23 | coding    | 0. 166      | 66    | 903   | 2102  |
| MSTRG. 17402. 25 | coding    | 0. 166      | 63    | 900   | 1609  |
| MSTRG. 17402. 29 | coding    | 0. 114      | 9     | 1542  | 2620  |
| MSTRG. 17402. 27 | coding    | 0. 125      | 9     | 1650  | 3627  |
| MSTRG. 17402. 31 | coding    | 0. 113      | 6     | 1542  | 2522  |

|                  |           |             |       |       |       |
|------------------|-----------|-------------|-------|-------|-------|
| MSTRG. 17402. 32 | coding    | 0. 124      | 6     | 1656  | 2185  |
| MSTRG. 17406. 1  | noncoding | -0. 053248  | 336   | 426   | 1355  |
| MSTRG. 17407. 1  | coding    | 0. 176      | 84    | 795   | 949   |
| MSTRG. 17402. 34 | noncoding | -0. 135168  | 1716  | 1758  | 2573  |
| MSTRG. 17402. 35 | noncoding | -0. 0155648 | 510   | 534   | 1134  |
| MSTRG. 17402. 36 | noncoding | -0. 0720896 | 1386  | 1443  | 1765  |
| MSTRG. 17402. 37 | coding    | 0. 156      | 1158  | 2769  | 3091  |
| MSTRG. 17408. 1  | noncoding | -0. 008192  | 1299  | 1314  | 1769  |
| MSTRG. 17409. 1  | noncoding | -0. 02048   | 456   | 642   | 1938  |
| MSTRG. 17409. 2  | noncoding | -0. 02048   | 507   | 693   | 1877  |
| MSTRG. 17409. 3  | noncoding | -0. 02048   | 507   | 693   | 1878  |
| MSTRG. 17410. 1  | noncoding | -0. 04096   | 93    | 174   | 329   |
| MSTRG. 17411. 1  | noncoding | -0. 0004096 | 345   | 396   | 1032  |
| MSTRG. 17412. 1  | noncoding | -0. 0004096 | 720   | 720   | 1498  |
| MSTRG. 17413. 1  | noncoding | -0. 0577536 | 417   | 684   | 3384  |
| MSTRG. 17414. 1  | noncoding | -0. 114688  | 21    | 33    | 601   |
| MSTRG. 17402. 38 | noncoding | -0. 026624  | 111   | 327   | 2384  |
| MSTRG. 17415. 1  | noncoding | -0. 057344  | 564   | 756   | 1624  |
| MSTRG. 17416. 1  | noncoding | -0. 1232896 | 0     | 69    | 802   |
| MSTRG. 17417. 1  | noncoding | -0. 0733184 | 666   | 699   | 1231  |
| MSTRG. 17407. 2  | coding    | 0. 146      | 66    | 1065  | 2330  |
| MSTRG. 17407. 3  | coding    | 0. 15       | 66    | 1050  | 5402  |
| MSTRG. 17407. 4  | coding    | 0. 242      | 0     | 264   | 1409  |
| MSTRG. 17418. 1  | noncoding | -0. 0233472 | 45    | 213   | 367   |
| MSTRG. 17419. 1  | noncoding | -0. 2023424 | 0     | 114   | 967   |
| MSTRG. 17420. 1  | noncoding | -0. 0827392 | 555   | 831   | 1153  |
| MSTRG. 17421. 2  | coding    | 0. 245      | 45    | 624   | 1556  |
| MSTRG. 17421. 4  | coding    | 0. 243      | 36    | 594   | 828   |
| MSTRG. 17422. 1  | coding    | 0. 074      | 705   | 1725  | 1978  |
| MSTRG. 17400. 2  | noncoding | -0. 0126976 | 609   | 762   | 917   |
| MSTRG. 17402. 68 | noncoding | -0. 03072   | 2013  | 2037  | 2486  |
| MSTRG. 17402. 75 | coding    | 0. 118      | 1212  | 2979  | 3134  |
| MSTRG. 17402. 77 | coding    | 0. 1        | 210   | 627   | 911   |
| MSTRG. 17424. 1  | noncoding | -0. 0970752 | 0     | 258   | 1125  |
| MSTRG. 17407. 10 | coding    | 0. 144      | 1440  | 4071  | 4360  |
| MSTRG. 17407. 12 | coding    | 0. 141      | 2178  | 4275  | 4588  |
| MSTRG. 17428. 1  | noncoding | -0. 0741376 | 0     | 189   | 573   |
| MSTRG. 17421. 5  | coding    | 0. 049      | 0     | 423   | 1331  |
| MSTRG. 17432. 1  | noncoding | -0. 045056  | 93    | 204   | 359   |
| MSTRG. 17421. 13 | coding    | 0. 145      | 117   | 1053  | 2442  |
| MSTRG. 17432. 2  | noncoding | -0. 0987136 | 135   | 426   | 884   |
| MSTRG. 17187. 1  | noncoding | -0. 02048   | 1593  | 1749  | 2644  |
| MSTRG. 17189. 1  | noncoding | -0. 0794624 | 585   | 612   | 767   |
| MSTRG. 17189. 2  | noncoding | -0. 1519616 | 816   | 831   | 984   |
| MSTRG. 17276. 3  | noncoding | -0. 0151552 | 7122  | 7236  | 7515  |
| MSTRG. 17276. 4  | coding    | 0. 115      | 9171  | 9447  | 21590 |
| MSTRG. 17276. 5  | coding    | 0. 115      | 16914 | 17190 | 24725 |
| MSTRG. 17276. 6  | noncoding | -0. 059392  | 7161  | 7413  | 7615  |
| MSTRG. 17276. 7  | noncoding | -0. 0581632 | 159   | 330   | 838   |
| MSTRG. 17278. 1  | coding    | 0. 259      | 210   | 756   | 1138  |
| MSTRG. 17278. 3  | coding    | 0. 157      | 189   | 885   | 1260  |
| MSTRG. 17278. 2  | coding    | 0. 157      | 183   | 879   | 1313  |
| MSTRG. 17278. 4  | coding    | 0. 259      | 345   | 891   | 1124  |
| MSTRG. 17279. 4  | coding    | 0. 191      | 2835  | 3723  | 4243  |

|                  |           |             |       |       |       |
|------------------|-----------|-------------|-------|-------|-------|
| MSTRG. 17279. 3  | coding    | 0. 19       | 0     | 1362  | 1760  |
| MSTRG. 17280. 5  | coding    | 0. 278      | 1029  | 2406  | 2560  |
| MSTRG. 17280. 4  | coding    | 0. 259      | 0     | 2250  | 2539  |
| MSTRG. 17190. 1  | coding    | 0. 132      | 192   | 4077  | 5497  |
| MSTRG. 17263. 3  | noncoding | -0. 0770048 | 2433  | 2751  | 4501  |
| MSTRG. 17264. 1  | noncoding | -0. 0540672 | 8853  | 9006  | 10507 |
| MSTRG. 17264. 2  | noncoding | -0. 08192   | 3687  | 3768  | 4658  |
| MSTRG. 17265. 1  | noncoding | -0. 024576  | 714   | 837   | 1006  |
| MSTRG. 17266. 1  | coding    | 0. 34       | 0     | 864   | 9552  |
| MSTRG. 17266. 3  | coding    | 0. 342      | 0     | 663   | 3855  |
| MSTRG. 17266. 5  | coding    | 0. 337      | 5646  | 5982  | 9174  |
| MSTRG. 17266. 6  | coding    | 0. 328      | 3288  | 3825  | 7004  |
| MSTRG. 17191. 1  | noncoding | -0. 0008192 | 159   | 258   | 923   |
| MSTRG. 17270. 1  | noncoding | -0. 1007616 | 3015  | 3753  | 3909  |
| MSTRG. 17269. 4  | coding    | 0. 2        | 240   | 2595  | 3265  |
| MSTRG. 17271. 1  | noncoding | -0. 0139264 | 1194  | 1410  | 3071  |
| MSTRG. 17292. 1  | noncoding | -0. 0339968 | 279   | 597   | 981   |
| MSTRG. 17292. 2  | noncoding | -0. 0339968 | 0     | 93    | 247   |
| MSTRG. 17294. 1  | coding    | 0. 331      | 0     | 1626  | 8155  |
| MSTRG. 17294. 2  | coding    | 0. 328      | 0     | 1614  | 7907  |
| MSTRG. 17294. 3  | coding    | 0. 266      | 6813  | 7926  | 17591 |
| MSTRG. 17294. 5  | coding    | 0. 302      | 0     | 948   | 14128 |
| MSTRG. 17294. 4  | coding    | 0. 296      | 171   | 1620  | 2476  |
| MSTRG. 17294. 6  | coding    | 0. 294      | 942   | 2439  | 3206  |
| MSTRG. 17294. 7  | noncoding | -0. 0499712 | 9321  | 9849  | 10861 |
| MSTRG. 17294. 9  | coding    | 0. 38       | 0     | 411   | 9252  |
| MSTRG. 17294. 8  | noncoding | -0. 0876544 | 843   | 1056  | 9899  |
| MSTRG. 17294. 10 | coding    | 0. 166      | 642   | 864   | 3553  |
| MSTRG. 17294. 12 | noncoding | -0. 012288  | 1806  | 1818  | 2607  |
| MSTRG. 17294. 13 | noncoding | -0. 016384  | 37776 | 37914 | 39055 |
| MSTRG. 17294. 14 | noncoding | -0. 016384  | 27015 | 27153 | 28328 |
| MSTRG. 17291. 1  | noncoding | -0. 028672  | 72    | 90    | 244   |
| MSTRG. 17299. 2  | coding    | 0. 357      | 2127  | 4662  | 5653  |
| MSTRG. 17299. 3  | coding    | 0. 357      | 4902  | 6846  | 7009  |
| MSTRG. 17301. 3  | coding    | 0. 284      | 708   | 1503  | 1773  |
| MSTRG. 17297. 2  | coding    | 0. 354      | 258   | 1110  | 2485  |
| MSTRG. 17307. 1  | noncoding | -0. 0487424 | 33    | 423   | 1119  |
| MSTRG. 17308. 3  | coding    | 0. 31       | 825   | 2745  | 7334  |
| MSTRG. 17308. 6  | coding    | 0. 279      | 33    | 2706  | 7125  |
| MSTRG. 17304. 1  | noncoding | -0. 0004096 | 0     | 0     | 371   |
| MSTRG. 17306. 1  | noncoding | -0. 0012288 | 225   | 273   | 548   |
| MSTRG. 17309. 2  | coding    | 0. 262      | 627   | 1905  | 3072  |
| MSTRG. 17310. 1  | noncoding | -0. 08192   | 0     | 18    | 291   |
| MSTRG. 17310. 2  | noncoding | -0. 094208  | 60    | 123   | 378   |
| MSTRG. 17311. 2  | coding    | 0. 508      | 0     | 1713  | 3731  |
| MSTRG. 17313. 1  | noncoding | -0. 016384  | 930   | 1521  | 1678  |
| MSTRG. 17313. 2  | noncoding | -0. 0385024 | 132   | 309   | 523   |
| MSTRG. 17315. 2  | coding    | 0. 302      | 0     | 1293  | 1581  |
| MSTRG. 17326. 3  | coding    | 0. 184      | 144   | 1242  | 3877  |
| MSTRG. 17329. 1  | coding    | 0. 098      | 1461  | 2769  | 9366  |
| MSTRG. 17333. 3  | coding    | 0. 171      | 3228  | 3960  | 4116  |
| MSTRG. 17333. 2  | noncoding | -0. 0475136 | 996   | 1344  | 1500  |
| MSTRG. 17334. 2  | coding    | 0. 016      | 480   | 1596  | 1923  |
| MSTRG. 17337. 1  | noncoding | -0. 0024576 | 4899  | 5049  | 5598  |

|                  |           |             |       |       |       |
|------------------|-----------|-------------|-------|-------|-------|
| MSTRG. 17339. 1  | noncoding | -0. 02048   | 6     | 111   | 373   |
| MSTRG. 17336. 6  | noncoding | -0. 008192  | 234   | 438   | 639   |
| MSTRG. 17336. 7  | noncoding | -0. 0045056 | 108   | 246   | 571   |
| MSTRG. 17340. 1  | noncoding | -0. 008192  | 1059  | 1260  | 1492  |
| MSTRG. 17341. 2  | coding    | 0. 143      | 912   | 1656  | 2411  |
| MSTRG. 17341. 6  | coding    | 0. 146      | 183   | 1044  | 1820  |
| MSTRG. 17343. 1  | noncoding | -0. 0524288 | 126   | 294   | 475   |
| MSTRG. 17349. 5  | coding    | 0. 245      | 0     | 2904  | 3610  |
| MSTRG. 17349. 4  | coding    | 0. 247      | 0     | 2970  | 3125  |
| MSTRG. 17350. 1  | coding    | 0. 044      | 141   | 372   | 810   |
| MSTRG. 17349. 9  | coding    | 0. 227      | 72    | 2112  | 4173  |
| MSTRG. 17349. 12 | coding    | 0. 228      | 72    | 2613  | 2897  |
| MSTRG. 17349. 8  | coding    | 0. 226      | 72    | 3021  | 3177  |
| MSTRG. 17349. 7  | coding    | 0. 226      | 72    | 3039  | 8565  |
| MSTRG. 17349. 10 | coding    | 0. 262      | 72    | 3945  | 4099  |
| MSTRG. 17349. 11 | coding    | 0. 261      | 72    | 3837  | 3991  |
| MSTRG. 17349. 13 | coding    | 0. 231      | 54    | 2916  | 3073  |
| MSTRG. 17349. 14 | noncoding | -0. 0139264 | 24    | 261   | 8082  |
| MSTRG. 17349. 15 | coding    | 0. 222      | 30    | 2904  | 3618  |
| MSTRG. 17351. 1  | noncoding | -0. 0139264 | 1785  | 1944  | 6525  |
| MSTRG. 17352. 1  | noncoding | -0. 0360448 | 1395  | 1551  | 4985  |
| MSTRG. 17347. 1  | noncoding | -0. 192512  | 294   | 354   | 509   |
| MSTRG. 17348. 1  | coding    | 0. 297      | 567   | 3354  | 5986  |
| MSTRG. 17348. 2  | coding    | 0. 297      | 318   | 3105  | 5735  |
| MSTRG. 17348. 4  | coding    | 0. 297      | 579   | 3366  | 5997  |
| MSTRG. 17368. 10 | coding    | 0. 035      | 18    | 948   | 3126  |
| MSTRG. 17368. 1  | coding    | 0. 062      | 402   | 1485  | 5688  |
| MSTRG. 17368. 4  | coding    | 0. 062      | 402   | 1485  | 5697  |
| MSTRG. 17368. 5  | coding    | 0. 062      | 402   | 1485  | 5701  |
| MSTRG. 17368. 7  | coding    | 0. 029      | 402   | 3345  | 5463  |
| MSTRG. 17368. 12 | coding    | 0. 021      | 402   | 4329  | 5654  |
| MSTRG. 17369. 1  | noncoding | -0. 018432  | 333   | 507   | 3053  |
| MSTRG. 17368. 13 | noncoding | -0. 069632  | 762   | 768   | 924   |
| MSTRG. 17368. 14 | noncoding | -0. 0544768 | 0     | 204   | 4113  |
| MSTRG. 17364. 3  | noncoding | -0. 0659456 | 0     | 237   | 7128  |
| MSTRG. 17366. 1  | coding    | 0. 165      | 534   | 2199  | 13229 |
| MSTRG. 17370. 2  | coding    | 0. 253      | 0     | 777   | 4316  |
| MSTRG. 17371. 2  | coding    | 0. 187      | 2076  | 3762  | 4896  |
| MSTRG. 17372. 1  | coding    | 0. 108      | 10698 | 10974 | 11409 |
| MSTRG. 17370. 3  | noncoding | -0. 043008  | 4338  | 4566  | 8577  |
| MSTRG. 17373. 1  | coding    | 0. 043      | 1683  | 1869  | 3423  |
| MSTRG. 17374. 1  | noncoding | -0. 0188416 | 6081  | 6255  | 6781  |
| MSTRG. 17370. 4  | noncoding | -0. 043008  | 3432  | 3660  | 21768 |
| MSTRG. 17370. 5  | noncoding | -0. 069632  | 429   | 507   | 7029  |
| MSTRG. 17370. 6  | coding    | 0. 256      | 0     | 270   | 6187  |
| MSTRG. 17370. 7  | noncoding | -0. 098304  | 1053  | 1134  | 4041  |
| MSTRG. 17370. 8  | noncoding | -0. 012288  | 7557  | 7668  | 10424 |
| MSTRG. 17370. 9  | coding    | 0. 043      | 13554 | 14121 | 16357 |
| MSTRG. 17375. 1  | noncoding | -0. 0376832 | 141   | 276   | 432   |
| MSTRG. 17370. 10 | noncoding | -0. 008192  | 2616  | 2739  | 8216  |
| MSTRG. 17379. 1  | coding    | 0. 225      | 1824  | 2127  | 4752  |
| MSTRG. 17379. 13 | noncoding | -0. 0364544 | 33    | 255   | 557   |
| MSTRG. 17379. 14 | coding    | 0. 225      | 1119  | 1422  | 3794  |
| MSTRG. 17379. 12 | coding    | 0. 225      | 477   | 780   | 3132  |

|                  |           |             |      |      |       |
|------------------|-----------|-------------|------|------|-------|
| MSTRG. 17379. 8  | coding    | 0. 225      | 1824 | 2127 | 4913  |
| MSTRG. 17379. 10 | coding    | 0. 225      | 1827 | 2130 | 4890  |
| MSTRG. 17379. 11 | coding    | 0. 225      | 1821 | 2124 | 4955  |
| MSTRG. 17379. 15 | coding    | 0. 225      | 1818 | 2121 | 8009  |
| MSTRG. 17380. 1  | noncoding | -0. 032768  | 939  | 1047 | 2477  |
| MSTRG. 17381. 1  | coding    | 0. 043      | 717  | 837  | 5431  |
| MSTRG. 17387. 2  | coding    | 0. 506      | 0    | 132  | 857   |
| MSTRG. 17397. 1  | noncoding | -0. 0131072 | 0    | 45   | 423   |
| MSTRG. 17438. 3  | coding    | 0. 211      | 294  | 1878 | 2100  |
| MSTRG. 17438. 6  | coding    | 0. 162      | 345  | 2814 | 3987  |
| MSTRG. 17438. 7  | coding    | 0. 157      | 345  | 2826 | 3999  |
| MSTRG. 17438. 8  | coding    | 0. 162      | 306  | 2877 | 4050  |
| MSTRG. 17438. 9  | coding    | 0. 204      | 5190 | 6774 | 6976  |
| MSTRG. 17438. 10 | coding    | 0. 18       | 630  | 2682 | 4136  |
| MSTRG. 17438. 11 | coding    | 0. 098      | 1494 | 2526 | 2774  |
| MSTRG. 17437. 1  | noncoding | -0. 04096   | 885  | 1215 | 1369  |
| MSTRG. 17441. 1  | coding    | 0. 445      | 63   | 1500 | 2427  |
| MSTRG. 17441. 2  | coding    | 0. 445      | 63   | 1500 | 2520  |
| MSTRG. 17441. 3  | noncoding | -0. 0393216 | 384  | 423  | 578   |
| MSTRG. 17462. 1  | noncoding | -0. 0446464 | 5331 | 5472 | 9025  |
| MSTRG. 17463. 1  | noncoding | -0. 0548864 | 0    | 72   | 1602  |
| MSTRG. 17464. 1  | noncoding | -0. 053248  | 3801 | 4434 | 4589  |
| MSTRG. 17464. 4  | noncoding | -0. 06144   | 753  | 1209 | 1364  |
| MSTRG. 17465. 1  | noncoding | -0. 0581632 | 2643 | 2721 | 3611  |
| MSTRG. 17467. 1  | noncoding | -0. 0434176 | 300  | 393  | 844   |
| MSTRG. 17469. 1  | noncoding | -0. 028672  | 1878 | 2043 | 4920  |
| MSTRG. 17470. 1  | noncoding | -0. 0290816 | 2991 | 3165 | 5638  |
| MSTRG. 17471. 1  | noncoding | -0. 18432   | 495  | 534  | 1726  |
| MSTRG. 17474. 1  | noncoding | -0. 0483328 | 2883 | 2997 | 14941 |
| MSTRG. 17475. 1  | noncoding | -0. 012288  | 4296 | 4458 | 23732 |
| MSTRG. 17475. 2  | noncoding | -0. 012288  | 3990 | 4152 | 17717 |
| MSTRG. 17475. 3  | noncoding | -0. 151552  | 9372 | 9414 | 12242 |
| MSTRG. 17476. 1  | noncoding | -0. 0106496 | 291  | 450  | 5310  |
| MSTRG. 17477. 1  | noncoding | -0. 0233472 | 750  | 948  | 5403  |
| MSTRG. 17478. 1  | noncoding | -0. 0073728 | 1599 | 1713 | 1991  |
| MSTRG. 17464. 12 | coding    | 0. 315      | 915  | 5754 | 5907  |
| MSTRG. 17464. 11 | coding    | 0. 338      | 915  | 4155 | 5710  |
| MSTRG. 17464. 10 | coding    | 0. 336      | 915  | 4077 | 6933  |
| MSTRG. 17464. 14 | coding    | 0. 34       | 879  | 5160 | 9797  |
| MSTRG. 17464. 16 | coding    | 0. 219      | 2475 | 3003 | 7265  |
| MSTRG. 17480. 1  | noncoding | -0. 0602112 | 57   | 405  | 999   |
| MSTRG. 17481. 1  | coding    | 0. 188      | 708  | 6174 | 7196  |
| MSTRG. 17481. 4  | coding    | 0. 188      | 900  | 6369 | 7380  |
| MSTRG. 17481. 5  | coding    | 0. 188      | 708  | 6177 | 7173  |
| MSTRG. 17481. 7  | coding    | 0. 188      | 900  | 6366 | 7356  |
| MSTRG. 17481. 6  | coding    | 0. 188      | 576  | 6045 | 7035  |
| MSTRG. 17446. 1  | noncoding | -0. 008192  | 159  | 327  | 1393  |
| MSTRG. 17450. 1  | coding    | 0. 08       | 270  | 4638 | 5202  |
| MSTRG. 17454. 1  | coding    | 0. 265      | 0    | 1704 | 2662  |
| MSTRG. 17454. 3  | coding    | 0. 261      | 114  | 1740 | 1951  |
| MSTRG. 17456. 2  | coding    | 0. 167      | 153  | 2640 | 4339  |
| MSTRG. 17456. 3  | coding    | 0. 167      | 69   | 2559 | 4257  |
| MSTRG. 17456. 4  | coding    | 0. 172      | 0    | 2538 | 4236  |
| MSTRG. 17456. 5  | coding    | 0. 17       | 363  | 2901 | 4601  |

|                  |           |             |       |       |       |
|------------------|-----------|-------------|-------|-------|-------|
| MSTRG. 17453. 2  | coding    | 0. 167      | 18    | 834   | 1307  |
| MSTRG. 17458. 3  | coding    | 0. 236      | 408   | 1527  | 1811  |
| MSTRG. 17524. 1  | coding    | 0. 154      | 102   | 1350  | 5416  |
| MSTRG. 17528. 1  | coding    | 0. 389      | 813   | 4263  | 7166  |
| MSTRG. 17528. 3  | coding    | 0. 389      | 0     | 3468  | 4806  |
| MSTRG. 17528. 2  | coding    | 0. 394      | 168   | 3531  | 4868  |
| MSTRG. 17528. 5  | coding    | 0. 445      | 405   | 3003  | 6189  |
| MSTRG. 17529. 1  | noncoding | -0. 0237568 | 0     | 180   | 360   |
| MSTRG. 17530. 1  | noncoding | -0. 06144   | 2130  | 2199  | 2404  |
| MSTRG. 17531. 1  | noncoding | -0. 04096   | 531   | 609   | 1186  |
| MSTRG. 17528. 6  | noncoding | -0. 0294912 | 3609  | 3789  | 24162 |
| MSTRG. 17528. 7  | noncoding | -0. 016384  | 1245  | 1395  | 7345  |
| MSTRG. 17528. 8  | noncoding | -0. 0589824 | 13494 | 13761 | 25791 |
| MSTRG. 17528. 9  | noncoding | -0. 0208896 | 5295  | 5424  | 8147  |
| MSTRG. 17532. 1  | noncoding | -0. 0401408 | 7611  | 7797  | 28868 |
| MSTRG. 17532. 2  | noncoding | -0. 004096  | 3753  | 3900  | 5147  |
| MSTRG. 17532. 3  | noncoding | -0. 0294912 | 12009 | 12264 | 14815 |
| MSTRG. 17528. 10 | noncoding | -0. 065536  | 1236  | 1284  | 1951  |
| MSTRG. 17528. 11 | noncoding | -0. 0049152 | 8925  | 9027  | 10849 |
| MSTRG. 17533. 1  | noncoding | -0. 008192  | 870   | 963   | 1735  |
| MSTRG. 17528. 12 | noncoding | -0. 016384  | 10206 | 10473 | 15584 |
| MSTRG. 17528. 13 | noncoding | -0. 0540672 | 0     | 243   | 22038 |
| MSTRG. 17528. 14 | noncoding | -0. 016384  | 8037  | 8304  | 13416 |
| MSTRG. 17528. 15 | noncoding | -0. 024576  | 3579  | 3699  | 6427  |
| MSTRG. 17528. 16 | noncoding | -0. 024576  | 3582  | 3702  | 6429  |
| MSTRG. 17528. 17 | noncoding | -0. 0540672 | 0     | 240   | 6569  |
| MSTRG. 17528. 18 | noncoding | -0. 04096   | 7941  | 8031  | 10562 |
| MSTRG. 17535. 1  | noncoding | -0. 0258048 | 615   | 693   | 898   |
| MSTRG. 17528. 19 | noncoding | -0. 059392  | 0     | 252   | 2178  |
| MSTRG. 17528. 20 | noncoding | -0. 0483328 | 0     | 219   | 851   |
| MSTRG. 17536. 1  | coding    | 0. 082      | 156   | 306   | 2804  |
| MSTRG. 17528. 21 | noncoding | -0. 0622592 | 0     | 261   | 3855  |
| MSTRG. 17459. 2  | coding    | 0. 169      | 0     | 588   | 1531  |
| MSTRG. 17482. 3  | noncoding | -0. 0065536 | 2517  | 2718  | 7118  |
| MSTRG. 17482. 4  | coding    | 0. 113      | 1905  | 2202  | 7131  |
| MSTRG. 17490. 2  | coding    | 0. 053      | 426   | 1620  | 1817  |
| MSTRG. 17490. 5  | coding    | 0. 259      | 1233  | 1935  | 4306  |
| MSTRG. 17490. 4  | coding    | 0. 239      | 402   | 1473  | 5795  |
| MSTRG. 17460. 3  | coding    | 0. 043      | 294   | 459   | 796   |
| MSTRG. 17496. 2  | coding    | 0. 213      | 141   | 864   | 1106  |
| MSTRG. 17498. 2  | coding    | 0. 177      | 21    | 1200  | 2787  |
| MSTRG. 17498. 3  | coding    | 0. 175      | 0     | 1065  | 2837  |
| MSTRG. 17539. 1  | coding    | 0. 135      | 270   | 7890  | 10376 |
| MSTRG. 17539. 2  | coding    | 0. 102      | 786   | 3924  | 4081  |
| MSTRG. 17541. 1  | noncoding | -0. 0249856 | 1599  | 1791  | 4622  |
| MSTRG. 17541. 2  | coding    | 0. 052      | 432   | 957   | 3619  |
| MSTRG. 17541. 3  | coding    | 0. 05       | 504   | 1110  | 1385  |
| MSTRG. 17541. 4  | coding    | 0. 05       | 903   | 1509  | 1785  |
| MSTRG. 17541. 5  | coding    | 0. 05       | 1287  | 1893  | 2168  |
| MSTRG. 17541. 6  | coding    | 0. 042      | 528   | 1047  | 2103  |
| MSTRG. 17541. 7  | coding    | 0. 024      | 372   | 828   | 1330  |
| MSTRG. 17546. 1  | coding    | 0. 087      | 1650  | 1926  | 5867  |
| MSTRG. 17541. 8  | coding    | 0. 099      | 459   | 732   | 7860  |
| MSTRG. 17548. 1  | noncoding | -0. 045056  | 627   | 753   | 1507  |

|                  |           |             |       |       |       |
|------------------|-----------|-------------|-------|-------|-------|
| MSTRG. 17550. 1  | noncoding | -0. 0339968 | 2226  | 2394  | 2906  |
| MSTRG. 17551. 1  | coding    | 0. 195      | 0     | 609   | 1199  |
| MSTRG. 17551. 2  | coding    | 0. 384      | 0     | 270   | 850   |
| MSTRG. 17552. 1  | noncoding | -0. 0180224 | 2184  | 2385  | 2667  |
| MSTRG. 17553. 1  | noncoding | -0. 0045056 | 0     | 48    | 1773  |
| MSTRG. 17557. 1  | coding    | 0. 034      | 0     | 3801  | 5490  |
| MSTRG. 17512. 2  | coding    | 0. 238      | 243   | 1986  | 2200  |
| MSTRG. 17515. 1  | noncoding | -0. 0004096 | 336   | 390   | 1675  |
| MSTRG. 17516. 3  | noncoding | -0. 0425984 | 0     | 279   | 947   |
| MSTRG. 17516. 4  | coding    | 0. 179      | 2580  | 4785  | 6225  |
| MSTRG. 17516. 5  | coding    | 0. 168      | 7263  | 9138  | 10577 |
| MSTRG. 17523. 6  | coding    | 0. 181      | 135   | 1335  | 2888  |
| MSTRG. 17523. 4  | coding    | 0. 181      | 177   | 1377  | 4034  |
| MSTRG. 17523. 7  | coding    | 0. 181      | 171   | 1371  | 4029  |
| MSTRG. 17523. 5  | coding    | 0. 147      | 177   | 2514  | 3982  |
| MSTRG. 17523. 8  | coding    | 0. 142      | 162   | 2655  | 4123  |
| MSTRG. 17559. 1  | coding    | 0. 331      | 2715  | 4299  | 6360  |
| MSTRG. 17559. 3  | coding    | 0. 241      | 0     | 1716  | 3036  |
| MSTRG. 17559. 4  | coding    | 0. 209      | 1455  | 3156  | 4430  |
| MSTRG. 17559. 5  | coding    | 0. 224      | 1707  | 3477  | 4745  |
| MSTRG. 17559. 7  | coding    | 0. 225      | 933   | 2700  | 3933  |
| MSTRG. 17559. 6  | coding    | 0. 224      | 3684  | 5454  | 6685  |
| MSTRG. 17559. 8  | coding    | 0. 27       | 2085  | 2760  | 2924  |
| MSTRG. 17560. 1  | noncoding | -0. 004096  | 3264  | 3351  | 4495  |
| MSTRG. 17560. 2  | noncoding | -0. 06144   | 216   | 240   | 803   |
| MSTRG. 17566. 3  | noncoding | -0. 0278528 | 4518  | 4920  | 5074  |
| MSTRG. 17566. 5  | noncoding | -0. 0229376 | 75    | 291   | 2726  |
| MSTRG. 17567. 1  | coding    | 0. 039      | 1119  | 1890  | 2162  |
| MSTRG. 17567. 2  | coding    | 0. 144      | 1110  | 1332  | 8673  |
| MSTRG. 17568. 1  | noncoding | -0. 012288  | 2955  | 3096  | 5666  |
| MSTRG. 17579. 1  | noncoding | -0. 0299008 | 1413  | 1740  | 4300  |
| MSTRG. 17580. 1  | coding    | 0. 336      | 711   | 6204  | 7189  |
| MSTRG. 17580. 3  | coding    | 0. 339      | 2997  | 8478  | 8912  |
| MSTRG. 17580. 2  | coding    | 0. 341      | 426   | 5634  | 6068  |
| MSTRG. 17580. 4  | coding    | 0. 338      | 0     | 5382  | 5802  |
| MSTRG. 17580. 6  | coding    | 0. 367      | 1509  | 4743  | 5148  |
| MSTRG. 17581. 2  | noncoding | -0. 014336  | 30    | 144   | 298   |
| MSTRG. 17581. 1  | noncoding | -0. 0135168 | 57    | 213   | 369   |
| MSTRG. 17581. 3  | noncoding | -0. 0729088 | 0     | 93    | 411   |
| MSTRG. 17582. 1  | noncoding | -0. 036864  | 26376 | 26661 | 34422 |
| MSTRG. 17582. 2  | noncoding | -0. 034816  | 402   | 573   | 7429  |
| MSTRG. 17580. 8  | noncoding | -0. 0483328 | 0     | 1215  | 23800 |
| MSTRG. 17580. 9  | noncoding | -0. 110592  | 0     | 210   | 18411 |
| MSTRG. 17580. 10 | noncoding | -0. 01024   | 6120  | 6354  | 7206  |
| MSTRG. 17580. 11 | noncoding | -0. 0462848 | 0     | 1155  | 17221 |
| MSTRG. 17571. 1  | coding    | 0. 263      | 0     | 3918  | 4414  |
| MSTRG. 17572. 1  | noncoding | -0. 0159744 | 114   | 285   | 1154  |
| MSTRG. 17571. 3  | coding    | 0. 247      | 120   | 3861  | 4495  |
| MSTRG. 17571. 4  | coding    | 0. 25       | 15    | 3774  | 4408  |
| MSTRG. 17571. 5  | coding    | 0. 256      | 15    | 3939  | 4625  |
| MSTRG. 17575. 1  | noncoding | -0. 0004096 | 0     | 0     | 348   |
| MSTRG. 17577. 1  | noncoding | -0. 03072   | 534   | 606   | 774   |
| MSTRG. 17577. 2  | noncoding | -0. 0192512 | 516   | 582   | 751   |
| MSTRG. 17584. 1  | noncoding | -0. 1470464 | 0     | 51    | 2647  |

|                |           |            |      |      |       |
|----------------|-----------|------------|------|------|-------|
| MSTRG.17585.9  | coding    | 0.099      | 3315 | 3534 | 25985 |
| MSTRG.17585.8  | noncoding | -0.0004096 | 3903 | 4380 | 5068  |
| MSTRG.17585.5  | noncoding | -0.1613824 | 0    | 309  | 5003  |
| MSTRG.17585.12 | noncoding | -0.0679936 | 0    | 345  | 4891  |
| MSTRG.17585.15 | coding    | 0.099      | 3246 | 3465 | 27415 |
| MSTRG.17585.16 | coding    | 0.099      | 3246 | 3465 | 31031 |
| MSTRG.17585.13 | noncoding | -0.1613824 | 0    | 309  | 5062  |
| MSTRG.17585.14 | noncoding | -0.1613824 | 0    | 309  | 5060  |
| MSTRG.17585.17 | noncoding | -0.0004096 | 3804 | 4281 | 4971  |
| MSTRG.17585.18 | noncoding | -0.0004096 | 2127 | 2604 | 5785  |
| MSTRG.17590.2  | coding    | 0.129      | 471  | 1779 | 2677  |
| MSTRG.17590.3  | coding    | 0.184      | 777  | 2592 | 3123  |
| MSTRG.17590.6  | coding    | 0.188      | 774  | 1860 | 2392  |
| MSTRG.17592.1  | noncoding | -0.0217088 | 1311 | 1410 | 5602  |
| MSTRG.17597.2  | noncoding | -0.1847296 | 0    | 78   | 1688  |
| MSTRG.17602.1  | noncoding | -0.0208896 | 0    | 129  | 695   |
| MSTRG.17615.1  | noncoding | -0.0376832 | 291  | 555  | 4698  |
| MSTRG.17615.2  | coding    | 0.125      | 2775 | 2991 | 3146  |
| MSTRG.17615.15 | coding    | 0.351      | 1326 | 3168 | 3644  |
| MSTRG.17615.5  | coding    | 0.363      | 414  | 2604 | 3081  |
| MSTRG.17615.18 | noncoding | -0.0897024 | 93   | 594  | 4643  |
| MSTRG.17605.2  | coding    | 0.271      | 0    | 468  | 805   |
| MSTRG.17605.3  | coding    | 0.164      | 177  | 594  | 931   |
| MSTRG.17608.6  | coding    | 0.499      | 0    | 4455 | 5062  |
| MSTRG.17608.8  | coding    | 0.497      | 0    | 4380 | 4987  |
| MSTRG.17608.4  | coding    | 0.495      | 0    | 4431 | 5039  |
| MSTRG.17608.5  | coding    | 0.497      | 0    | 4461 | 5069  |
| MSTRG.17608.7  | coding    | 0.498      | 0    | 4581 | 5189  |
| MSTRG.17608.9  | coding    | 0.497      | 378  | 4884 | 5492  |
| MSTRG.17608.2  | coding    | 0.503      | 0    | 4263 | 4870  |
| MSTRG.17607.1  | noncoding | -0.0118784 | 0    | 99   | 1368  |
| MSTRG.17619.1  | coding    | 0.274      | 135  | 2034 | 2660  |
| MSTRG.17622.1  | coding    | 0.249      | 141  | 2073 | 5750  |
| MSTRG.17622.2  | coding    | 0.273      | 0    | 1776 | 5436  |
| MSTRG.17619.3  | coding    | 0.235      | 420  | 711  | 2245  |
| MSTRG.17622.8  | coding    | 0.22       | 1419 | 3606 | 4604  |
| MSTRG.17622.9  | coding    | 0.22       | 1407 | 3585 | 4540  |
| MSTRG.17622.11 | coding    | 0.271      | 0    | 1779 | 2004  |
| MSTRG.17628.2  | coding    | 0.15       | 0    | 600  | 2625  |
| MSTRG.17629.1  | coding    | 0.296      | 516  | 870  | 1840  |
| MSTRG.17631.2  | coding    | 0.288      | 186  | 2382 | 2606  |
| MSTRG.17631.3  | coding    | 0.264      | 237  | 2583 | 2960  |
| MSTRG.17631.4  | coding    | 0.283      | 444  | 2700 | 3078  |
| MSTRG.17624.1  | coding    | 0.266      | 0    | 390  | 597   |
| MSTRG.17635.2  | coding    | 0.459      | 0    | 1674 | 3593  |
| MSTRG.17635.1  | coding    | 0.395      | 459  | 1671 | 3887  |
| MSTRG.17635.3  | coding    | 0.459      | 0    | 1662 | 3584  |
| MSTRG.17636.1  | noncoding | -0.0352256 | 675  | 882  | 1168  |
| MSTRG.17635.4  | coding    | 0.421      | 2190 | 3597 | 5522  |
| MSTRG.17635.6  | coding    | 0.421      | 996  | 2403 | 4301  |
| MSTRG.17635.7  | coding    | 0.421      | 996  | 2403 | 4301  |
| MSTRG.17635.9  | coding    | 0.421      | 153  | 1560 | 3457  |
| MSTRG.17635.10 | noncoding | -0.008192  | 567  | 729  | 886   |
| MSTRG.17638.1  | noncoding | -0.0159744 | 5328 | 5604 | 7044  |



|                |           |            |       |       |       |
|----------------|-----------|------------|-------|-------|-------|
| MSTRG.17639.1  | noncoding | -0.0331776 | 8184  | 8547  | 11009 |
| MSTRG.17640.1  | noncoding | -0.0536576 | 450   | 657   | 1131  |
| MSTRG.17641.1  | noncoding | -0.012288  | 951   | 1020  | 2221  |
| MSTRG.17635.12 | coding    | 0.179      | 7875  | 8262  | 10059 |
| MSTRG.17632.2  | coding    | 0.492      | 957   | 2970  | 4545  |
| MSTRG.17632.3  | coding    | 0.492      | 831   | 2844  | 4385  |
| MSTRG.17643.2  | coding    | 0.298      | 0     | 222   | 807   |
| MSTRG.17643.3  | coding    | 0.358      | 0     | 132   | 812   |
| MSTRG.17645.3  | coding    | 0.319      | 351   | 4035  | 4204  |
| MSTRG.17645.7  | coding    | 0.296      | 1278  | 1902  | 7376  |
| MSTRG.17647.1  | coding    | 0.29       | 0     | 6006  | 22062 |
| MSTRG.17647.2  | coding    | 0.29       | 0     | 5862  | 9160  |
| MSTRG.17647.3  | coding    | 0.291      | 0     | 5727  | 14478 |
| MSTRG.17647.4  | coding    | 0.291      | 0     | 5922  | 12912 |
| MSTRG.17648.2  | coding    | 0.155      | 0     | 2070  | 2303  |
| MSTRG.17653.1  | noncoding | -0.008192  | 105   | 207   | 974   |
| MSTRG.17654.1  | noncoding | -0.086016  | 345   | 441   | 2207  |
| MSTRG.17660.1  | coding    | 0.351      | 297   | 891   | 6360  |
| MSTRG.17661.3  | coding    | 0.302      | 102   | 576   | 741   |
| MSTRG.17661.4  | coding    | 0.308      | 66    | 492   | 656   |
| MSTRG.17663.2  | noncoding | -0.0147456 | 483   | 633   | 787   |
| MSTRG.17665.2  | noncoding | -0.0827392 | 0     | 237   | 428   |
| MSTRG.17667.2  | coding    | 0.346      | 306   | 711   | 945   |
| MSTRG.17669.1  | noncoding | -0.07168   | 0     | 3     | 364   |
| MSTRG.17670.1  | noncoding | -0.0446464 | 114   | 297   | 451   |
| MSTRG.17672.1  | noncoding | -0.24576   | 27    | 45    | 254   |
| MSTRG.17674.2  | noncoding | -0.0851968 | 183   | 408   | 1335  |
| MSTRG.17674.1  | noncoding | -0.088064  | 183   | 411   | 1463  |
| MSTRG.17674.3  | noncoding | -0.0700416 | 831   | 1053  | 1484  |
| MSTRG.17677.1  | coding    | 0.357      | 0     | 771   | 2821  |
| MSTRG.17677.3  | coding    | 0.37       | 0     | 921   | 2807  |
| MSTRG.17679.2  | coding    | 0.457      | 1011  | 1821  | 3204  |
| MSTRG.17676.2  | noncoding | -0.1257472 | 0     | 612   | 1758  |
| MSTRG.17681.1  | coding    | 0.331      | 186   | 1245  | 2375  |
| MSTRG.17681.3  | coding    | 0.343      | 138   | 1515  | 2640  |
| MSTRG.17682.2  | coding    | 0.566      | 402   | 1152  | 2322  |
| MSTRG.17685.2  | coding    | 0.35       | 0     | 1074  | 1775  |
| MSTRG.17686.1  | noncoding | -0.0618496 | 765   | 1086  | 1293  |
| MSTRG.17706.6  | coding    | 0.162      | 1431  | 8094  | 9190  |
| MSTRG.17706.4  | coding    | 0.137      | 2880  | 10824 | 11920 |
| MSTRG.17706.5  | coding    | 0.156      | 1638  | 8544  | 9639  |
| MSTRG.17706.8  | coding    | 0.156      | 1584  | 8490  | 9576  |
| MSTRG.17706.7  | coding    | 0.156      | 1557  | 8463  | 9548  |
| MSTRG.17706.9  | coding    | 0.156      | 2229  | 9135  | 10220 |
| MSTRG.17706.12 | coding    | 0.162      | 12675 | 19338 | 20361 |
| MSTRG.17706.14 | coding    | 0.156      | 1440  | 8346  | 9367  |
| MSTRG.17706.11 | coding    | 0.156      | 1554  | 8460  | 9481  |
| MSTRG.17706.10 | coding    | 0.133      | 30    | 8235  | 9257  |
| MSTRG.17706.16 | coding    | 0.162      | 1593  | 8256  | 9270  |
| MSTRG.17706.18 | coding    | 0.162      | 2778  | 9441  | 10450 |
| MSTRG.17706.17 | coding    | 0.156      | 1485  | 8391  | 9399  |
| MSTRG.17706.19 | coding    | 0.162      | 1308  | 7971  | 8957  |
| MSTRG.17706.20 | coding    | 0.156      | 1434  | 8340  | 9326  |
| MSTRG.17706.22 | coding    | 0.027      | 2154  | 3300  | 4089  |

|                  |           |             |      |      |       |
|------------------|-----------|-------------|------|------|-------|
| MSTRG. 17706. 23 | noncoding | -0. 0008192 | 381  | 456  | 2798  |
| MSTRG. 17695. 1  | coding    | 0. 248      | 1143 | 2025 | 2371  |
| MSTRG. 17697. 1  | noncoding | -0. 0303104 | 24   | 189  | 1186  |
| MSTRG. 17698. 2  | coding    | 0. 282      | 330  | 1377 | 2129  |
| MSTRG. 17698. 3  | coding    | 0. 219      | 15   | 1221 | 1586  |
| MSTRG. 17701. 2  | coding    | 0. 284      | 0    | 858  | 3349  |
| MSTRG. 17702. 1  | noncoding | -0. 032768  | 30   | 66   | 233   |
| MSTRG. 17710. 3  | coding    | 0. 384      | 0    | 3009 | 5568  |
| MSTRG. 17710. 4  | coding    | 0. 383      | 0    | 3006 | 5565  |
| MSTRG. 17710. 6  | coding    | 0. 372      | 0    | 3144 | 3429  |
| MSTRG. 17711. 4  | noncoding | -0. 1138688 | 66   | 312  | 551   |
| MSTRG. 17711. 2  | coding    | 0. 463      | 0    | 2901 | 3141  |
| MSTRG. 17709. 1  | noncoding | -0. 0233472 | 147  | 264  | 426   |
| MSTRG. 17714. 1  | coding    | 0. 347      | 2208 | 3642 | 11364 |
| MSTRG. 17714. 4  | coding    | 0. 366      | 0    | 1425 | 3736  |
| MSTRG. 17718. 2  | coding    | 0. 184      | 0    | 2334 | 5521  |
| MSTRG. 17718. 3  | noncoding | -0. 0421888 | 264  | 501  | 2556  |
| MSTRG. 17730. 1  | noncoding | -0. 045056  | 183  | 291  | 2805  |
| MSTRG. 17731. 1  | noncoding | -0. 0045056 | 1638 | 2388 | 5834  |
| MSTRG. 17731. 2  | noncoding | -0. 139264  | 651  | 693  | 1382  |
| MSTRG. 17729. 6  | noncoding | -0. 0581632 | 9675 | 9912 | 16185 |
| MSTRG. 17729. 4  | coding    | 0. 294      | 0    | 4722 | 8215  |
| MSTRG. 17729. 5  | coding    | 0. 295      | 0    | 4890 | 8383  |
| MSTRG. 17729. 7  | coding    | 0. 282      | 0    | 4497 | 4651  |
| MSTRG. 17729. 8  | coding    | 0. 284      | 456  | 4839 | 4994  |
| MSTRG. 17729. 9  | noncoding | -0. 043008  | 4107 | 4377 | 7939  |
| MSTRG. 17732. 1  | noncoding | -0. 0323584 | 5364 | 5529 | 7373  |
| MSTRG. 17729. 10 | noncoding | -0. 0974848 | 3753 | 3996 | 4150  |
| MSTRG. 17733. 7  | coding    | 0. 251      | 966  | 2328 | 4345  |
| MSTRG. 17733. 10 | coding    | 0. 161      | 0    | 2259 | 4276  |
| MSTRG. 17733. 12 | coding    | 0. 219      | 0    | 2340 | 2656  |
| MSTRG. 17733. 11 | coding    | 0. 182      | 153  | 2022 | 2339  |
| MSTRG. 17725. 2  | coding    | 0. 291      | 114  | 501  | 3323  |
| MSTRG. 17728. 1  | noncoding | -0. 0004096 | 147  | 147  | 392   |
| MSTRG. 17735. 2  | coding    | 0. 178      | 396  | 591  | 1628  |
| MSTRG. 17740. 2  | coding    | 0. 144      | 474  | 1434 | 1671  |
| MSTRG. 17741. 4  | noncoding | -0. 0004096 | 1266 | 1329 | 2029  |
| MSTRG. 17741. 5  | noncoding | -0. 057344  | 0    | 93   | 2679  |
| MSTRG. 17741. 6  | coding    | 0. 048      | 3780 | 4032 | 4608  |
| MSTRG. 17744. 1  | noncoding | -0. 01024   | 27   | 123  | 352   |
| MSTRG. 17751. 2  | coding    | 0. 174      | 12   | 1032 | 1651  |
| MSTRG. 17755. 2  | noncoding | -0. 057344  | 498  | 564  | 1671  |
| MSTRG. 17755. 3  | noncoding | -0. 057344  | 507  | 573  | 1682  |
| MSTRG. 17747. 1  | noncoding | -0. 045056  | 510  | 609  | 1166  |
| MSTRG. 17762. 1  | noncoding | -0. 0004096 | 0    | 0    | 355   |
| MSTRG. 17775. 2  | noncoding | -0. 0405504 | 4986 | 5169 | 5884  |
| MSTRG. 17776. 2  | coding    | 0. 365      | 0    | 495  | 7123  |
| MSTRG. 17779. 1  | coding    | 0. 196      | 1239 | 2280 | 32600 |
| MSTRG. 17779. 2  | coding    | 0. 22       | 756  | 2472 | 14939 |
| MSTRG. 17779. 4  | coding    | 0. 196      | 1362 | 2403 | 23835 |
| MSTRG. 17779. 5  | coding    | 0. 213      | 699  | 2253 | 19781 |
| MSTRG. 17779. 10 | coding    | 0. 222      | 4605 | 6198 | 18157 |
| MSTRG. 17779. 11 | coding    | 0. 196      | 1662 | 2703 | 13056 |
| MSTRG. 17768. 1  | coding    | 0. 591      | 0    | 1785 | 2757  |

|                 |           |             |       |       |       |
|-----------------|-----------|-------------|-------|-------|-------|
| MSTRG. 17769. 3 | coding    | 0. 332      | 87    | 774   | 1113  |
| MSTRG. 17770. 2 | noncoding | -0. 0925696 | 462   | 1188  | 1669  |
| MSTRG. 17770. 3 | noncoding | -0. 0954368 | 462   | 1068  | 1223  |
| MSTRG. 17773. 1 | noncoding | -0. 043008  | 2592  | 3000  | 7413  |
| MSTRG. 17773. 2 | coding    | 0. 131      | 0     | 4173  | 8526  |
| MSTRG. 17773. 3 | coding    | 0. 108      | 10728 | 11187 | 15590 |
| MSTRG. 17774. 1 | noncoding | -0. 0393216 | 63    | 84    | 680   |
| MSTRG. 17781. 2 | noncoding | -0. 026624  | 7008  | 7179  | 7335  |
| MSTRG. 17781. 3 | coding    | 0. 207      | 7323  | 8910  | 12244 |
| MSTRG. 17782. 1 | noncoding | -0. 1024    | 1101  | 1185  | 4346  |
| MSTRG. 17784. 3 | coding    | 0. 441      | 0     | 2667  | 3105  |
| MSTRG. 17785. 2 | coding    | 0. 214      | 669   | 1140  | 1563  |
| MSTRG. 17785. 3 | noncoding | -0. 024576  | 2835  | 3000  | 3156  |
| MSTRG. 17789. 1 | coding    | 0. 139      | 231   | 1734  | 2368  |
| MSTRG. 17789. 4 | coding    | 0. 139      | 321   | 1824  | 2458  |
| MSTRG. 17789. 6 | coding    | 0. 144      | 231   | 1650  | 2284  |
| MSTRG. 17791. 6 | coding    | 0. 313      | 996   | 2676  | 3349  |
| MSTRG. 17791. 5 | coding    | 0. 313      | 1137  | 2817  | 3492  |
| MSTRG. 17791. 4 | coding    | 0. 313      | 900   | 2580  | 3254  |
| MSTRG. 17792. 1 | noncoding | -0. 036864  | 2019  | 2076  | 4311  |
| MSTRG. 17796. 2 | coding    | 0. 405      | 1071  | 2934  | 3120  |
| MSTRG. 17794. 1 | coding    | 0. 31       | 402   | 2643  | 2798  |
| MSTRG. 17802. 1 | coding    | 0. 302      | 0     | 459   | 861   |
| MSTRG. 17807. 1 | coding    | 0. 366      | 0     | 1932  | 4269  |
| MSTRG. 17806. 1 | noncoding | -0. 0442368 | 0     | 282   | 622   |
| MSTRG. 17814. 1 | coding    | 0. 356      | 111   | 825   | 1447  |
| MSTRG. 17814. 2 | noncoding | -0. 0401408 | 0     | 315   | 14620 |
| MSTRG. 17816. 1 | noncoding | -0. 0151552 | 1482  | 1800  | 2592  |
| MSTRG. 17814. 6 | coding    | 0. 374      | 138   | 1314  | 3749  |
| MSTRG. 17814. 4 | coding    | 0. 369      | 102   | 1188  | 3623  |
| MSTRG. 17814. 5 | coding    | 0. 374      | 111   | 1326  | 3761  |
| MSTRG. 17817. 2 | noncoding | -0. 0057344 | 840   | 1050  | 1204  |
| MSTRG. 17817. 1 | coding    | 0. 113      | 0     | 840   | 1151  |
| MSTRG. 17817. 3 | coding    | 0. 097      | 0     | 765   | 1313  |
| MSTRG. 17810. 2 | coding    | 0. 361      | 99    | 1632  | 3128  |
| MSTRG. 17811. 3 | coding    | 0. 415      | 588   | 1251  | 1406  |
| MSTRG. 17825. 4 | coding    | 0. 365      | 117   | 2814  | 5991  |
| MSTRG. 17826. 4 | coding    | 0. 564      | 0     | 1548  | 1719  |
| MSTRG. 17826. 3 | coding    | 0. 489      | 0     | 1440  | 1613  |
| MSTRG. 17826. 2 | coding    | 0. 486      | 0     | 1503  | 1679  |
| MSTRG. 17826. 7 | coding    | 0. 478      | 72    | 732   | 904   |
| MSTRG. 17826. 8 | coding    | 0. 469      | 309   | 1026  | 1197  |
| MSTRG. 17826. 6 | coding    | 0. 468      | 180   | 897   | 1071  |
| MSTRG. 17826. 9 | coding    | 0. 472      | 63    | 786   | 958   |
| MSTRG. 17828. 6 | coding    | 0. 364      | 2013  | 2550  | 6311  |
| MSTRG. 17828. 7 | coding    | 0. 349      | 4809  | 5508  | 9270  |
| MSTRG. 17828. 3 | coding    | 0. 406      | 0     | 669   | 4348  |
| MSTRG. 17829. 1 | noncoding | -0. 0008192 | 75    | 219   | 2377  |
| MSTRG. 17830. 4 | coding    | 0. 314      | 18    | 651   | 2249  |
| MSTRG. 17830. 5 | coding    | 0. 313      | 18    | 648   | 2246  |
| MSTRG. 17830. 6 | coding    | 0. 319      | 2352  | 2901  | 4499  |
| MSTRG. 17832. 2 | coding    | 0. 533      | 81    | 1392  | 1547  |
| MSTRG. 17833. 1 | noncoding | -0. 0147456 | 0     | 18    | 284   |
| MSTRG. 17835. 2 | coding    | 0. 368      | 0     | 903   | 1354  |

|                 |           |             |      |      |      |
|-----------------|-----------|-------------|------|------|------|
| MSTRG. 17836. 2 | coding    | 0. 485      | 180  | 1827 | 2150 |
| MSTRG. 17836. 3 | coding    | 0. 401      | 0    | 2235 | 2559 |
| MSTRG. 17837. 3 | coding    | 0. 414      | 0    | 675  | 1662 |
| MSTRG. 17837. 4 | coding    | 0. 494      | 0    | 315  | 1594 |
| MSTRG. 17839. 4 | coding    | 0. 422      | 321  | 3843 | 4353 |
| MSTRG. 17819. 1 | noncoding | -0. 0417792 | 588  | 720  | 1708 |
| MSTRG. 17821. 2 | coding    | 0. 476      | 93   | 1623 | 2248 |
| MSTRG. 17841. 2 | coding    | 0. 556      | 756  | 1761 | 1937 |
| MSTRG. 17841. 3 | coding    | 0. 607      | 0    | 966  | 1140 |
| MSTRG. 17841. 4 | coding    | 0. 557      | 162  | 1110 | 1286 |
| MSTRG. 17841. 5 | coding    | 0. 556      | 831  | 1836 | 2012 |
| MSTRG. 17841. 6 | coding    | 0. 557      | 237  | 1185 | 1361 |
| MSTRG. 17842. 1 | coding    | 0. 455      | 1125 | 1749 | 2270 |
| MSTRG. 17842. 4 | coding    | 0. 517      | 0    | 912  | 1432 |
| MSTRG. 17840. 1 | coding    | 0. 533      | 120  | 1671 | 1828 |
| MSTRG. 17840. 2 | coding    | 0. 526      | 15   | 1683 | 1846 |
| MSTRG. 17845. 4 | coding    | 0. 331      | 1026 | 2280 | 2609 |
| MSTRG. 17847. 1 | coding    | 0. 389      | 0    | 723  | 3200 |
| MSTRG. 17847. 3 | coding    | 0. 357      | 408  | 1104 | 1657 |
| MSTRG. 17849. 1 | noncoding | -0. 0176128 | 243  | 360  | 519  |
| MSTRG. 17848. 5 | coding    | 0. 375      | 651  | 7251 | 7882 |
| MSTRG. 17856. 1 | coding    | 0. 306      | 894  | 1491 | 1646 |
| MSTRG. 17863. 4 | coding    | 0. 344      | 810  | 1653 | 1815 |
| MSTRG. 17863. 2 | coding    | 0. 374      | 0    | 1395 | 1556 |
| MSTRG. 17863. 3 | coding    | 0. 375      | 438  | 1635 | 1796 |
| MSTRG. 17863. 5 | coding    | 0. 344      | 591  | 1434 | 1595 |
| MSTRG. 17873. 4 | coding    | 0. 246      | 1077 | 1935 | 3236 |
| MSTRG. 17873. 3 | coding    | 0. 298      | 0    | 1590 | 2890 |
| MSTRG. 17878. 1 | coding    | 0. 386      | 0    | 2880 | 4346 |
| MSTRG. 17878. 2 | coding    | 0. 412      | 0    | 2793 | 4259 |
| MSTRG. 17878. 4 | coding    | 0. 395      | 0    | 2940 | 3776 |
| MSTRG. 17878. 5 | coding    | 0. 372      | 0    | 1839 | 3475 |
| MSTRG. 17878. 6 | noncoding | -0. 0335872 | 2889 | 3264 | 5275 |
| MSTRG. 17879. 2 | noncoding | -0. 069632  | 240  | 933  | 1108 |
| MSTRG. 17878. 7 | noncoding | -0. 0241664 | 3618 | 4062 | 4291 |
| MSTRG. 17865. 1 | noncoding | -0. 012288  | 0    | 276  | 653  |
| MSTRG. 17866. 1 | noncoding | -0. 0118784 | 255  | 321  | 1152 |
| MSTRG. 17867. 1 | noncoding | -0. 0188416 | 414  | 561  | 1066 |
| MSTRG. 17891. 1 | coding    | 0. 403      | 201  | 1536 | 3716 |
| MSTRG. 17892. 2 | coding    | 0. 092      | 3759 | 4425 | 5342 |
| MSTRG. 17892. 3 | coding    | 0. 067      | 447  | 600  | 3793 |
| MSTRG. 17892. 4 | noncoding | -0. 045056  | 3942 | 4254 | 8565 |
| MSTRG. 17892. 5 | coding    | 0. 092      | 3162 | 3828 | 4745 |
| MSTRG. 17892. 7 | noncoding | -0. 012288  | 561  | 651  | 1754 |
| MSTRG. 17903. 1 | noncoding | -0. 0176128 | 96   | 195  | 425  |
| MSTRG. 17904. 6 | coding    | 0. 491      | 0    | 1383 | 1862 |
| MSTRG. 17904. 5 | coding    | 0. 414      | 1767 | 3540 | 4021 |
| MSTRG. 17904. 7 | coding    | 0. 502      | 549  | 1467 | 1915 |
| MSTRG. 17908. 1 | coding    | 0. 27       | 0    | 690  | 1819 |
| MSTRG. 17906. 1 | noncoding | -0. 0004096 | 0    | 0    | 579  |
| MSTRG. 17907. 2 | coding    | 0. 528      | 0    | 402  | 1199 |
| MSTRG. 17912. 2 | noncoding | -0. 0688128 | 87   | 369  | 524  |
| MSTRG. 17913. 1 | noncoding | -0. 028672  | 420  | 543  | 1375 |
| MSTRG. 17921. 1 | coding    | 0. 07       | 27   | 1197 | 2370 |

|                  |           |             |      |       |       |
|------------------|-----------|-------------|------|-------|-------|
| MSTRG. 17921. 5  | coding    | 0. 088      | 24   | 1347  | 1862  |
| MSTRG. 17923. 1  | coding    | 0. 48       | 192  | 1185  | 1714  |
| MSTRG. 17924. 1  | coding    | 0. 084      | 387  | 735   | 1275  |
| MSTRG. 17923. 2  | noncoding | -0. 0708608 | 354  | 729   | 929   |
| MSTRG. 17923. 3  | coding    | 0. 477      | 57   | 1017  | 1546  |
| MSTRG. 17923. 4  | coding    | 0. 465      | 66   | 1086  | 2949  |
| MSTRG. 17923. 5  | noncoding | -0. 024576  | 48   | 165   | 922   |
| MSTRG. 17918. 1  | noncoding | -0. 008192  | 300  | 390   | 1291  |
| MSTRG. 17929. 1  | noncoding | -0. 057344  | 240  | 291   | 1545  |
| MSTRG. 17919. 1  | noncoding | -0. 0561152 | 0    | 153   | 324   |
| MSTRG. 17931. 1  | coding    | 0. 246      | 0    | 891   | 1384  |
| MSTRG. 17931. 3  | noncoding | -0. 0708608 | 54   | 360   | 616   |
| MSTRG. 17931. 4  | noncoding | -0. 0700416 | 0    | 378   | 633   |
| MSTRG. 17941. 1  | coding    | 0. 548      | 165  | 1680  | 4699  |
| MSTRG. 17942. 3  | coding    | 0. 039      | 330  | 1662  | 3157  |
| MSTRG. 17943. 4  | noncoding | -0. 04096   | 291  | 942   | 1133  |
| MSTRG. 17943. 2  | coding    | 0. 197      | 75   | 1173  | 1362  |
| MSTRG. 17943. 3  | coding    | 0. 202      | 441  | 1551  | 1740  |
| MSTRG. 17954. 3  | coding    | 0. 201      | 3099 | 4179  | 5245  |
| MSTRG. 17952. 2  | coding    | 0. 35       | 0    | 1191  | 3239  |
| MSTRG. 17958. 1  | coding    | 0. 38       | 1749 | 2817  | 4559  |
| MSTRG. 17963. 2  | noncoding | -0. 0004096 | 285  | 285   | 466   |
| MSTRG. 17963. 1  | noncoding | -0. 380928  | 279  | 288   | 609   |
| MSTRG. 17972. 5  | coding    | 0. 179      | 441  | 2574  | 5681  |
| MSTRG. 17972. 7  | coding    | 0. 179      | 519  | 2652  | 5758  |
| MSTRG. 17972. 6  | coding    | 0. 181      | 519  | 2631  | 12521 |
| MSTRG. 17972. 10 | coding    | 0. 179      | 480  | 2613  | 5720  |
| MSTRG. 17972. 8  | coding    | 0. 181      | 426  | 2538  | 5646  |
| MSTRG. 17972. 9  | coding    | 0. 179      | 405  | 2538  | 5646  |
| MSTRG. 17972. 11 | coding    | 0. 181      | 552  | 2664  | 3194  |
| MSTRG. 17973. 1  | noncoding | -0. 02048   | 351  | 405   | 1308  |
| MSTRG. 17975. 1  | coding    | 0. 465      | 0    | 1344  | 1681  |
| MSTRG. 17978. 2  | coding    | 0. 468      | 234  | 1788  | 2136  |
| MSTRG. 17980. 2  | coding    | 0. 411      | 381  | 2040  | 3925  |
| MSTRG. 17980. 3  | coding    | 0. 414      | 1821 | 3690  | 5574  |
| MSTRG. 17981. 1  | noncoding | -0. 004096  | 1578 | 1680  | 1837  |
| MSTRG. 17982. 2  | coding    | 0. 297      | 135  | 1557  | 3146  |
| MSTRG. 17984. 8  | coding    | 0. 367      | 219  | 2181  | 4842  |
| MSTRG. 17984. 7  | coding    | 0. 337      | 219  | 1332  | 5734  |
| MSTRG. 17984. 10 | coding    | 0. 387      | 1365 | 3501  | 6163  |
| MSTRG. 17985. 1  | noncoding | -0. 0053248 | 864  | 1014  | 1663  |
| MSTRG. 17986. 2  | coding    | 0. 243      | 0    | 4911  | 6739  |
| MSTRG. 17987. 3  | coding    | 0. 527      | 819  | 2019  | 5109  |
| MSTRG. 17987. 4  | coding    | 0. 527      | 855  | 2055  | 6452  |
| MSTRG. 17987. 5  | coding    | 0. 507      | 1587 | 3342  | 7723  |
| MSTRG. 17988. 1  | noncoding | -0. 139264  | 21   | 66    | 373   |
| MSTRG. 17989. 1  | noncoding | -0. 0647168 | 0    | 321   | 1175  |
| MSTRG. 17999. 2  | coding    | 0. 346      | 8976 | 12756 | 13261 |
| MSTRG. 17999. 3  | coding    | 0. 327      | 9024 | 12240 | 14482 |
| MSTRG. 17999. 5  | coding    | 0. 16       | 84   | 885   | 9524  |
| MSTRG. 17995. 1  | coding    | 0. 381      | 0    | 333   | 521   |
| MSTRG. 17996. 1  | noncoding | -0. 0131072 | 243  | 414   | 1033  |
| MSTRG. 17998. 1  | noncoding | -0. 06144   | 162  | 243   | 521   |
| MSTRG. 18002. 1  | coding    | 0. 335      | 123  | 558   | 817   |

|                |           |            |      |      |      |
|----------------|-----------|------------|------|------|------|
| MSTRG.18015.1  | coding    | 0.375      | 3189 | 3834 | 4763 |
| MSTRG.18019.1  | noncoding | -0.032768  | 1044 | 1122 | 1605 |
| MSTRG.18024.4  | coding    | 0.251      | 27   | 1032 | 1835 |
| MSTRG.18024.9  | coding    | 0.431      | 351  | 1281 | 2608 |
| MSTRG.18024.11 | coding    | 0.408      | 261  | 1149 | 1588 |
| MSTRG.18024.12 | coding    | 0.304      | 408  | 951  | 1752 |
| MSTRG.18024.13 | coding    | 0.315      | 186  | 714  | 2059 |
| MSTRG.18025.1  | noncoding | -0.110592  | 2370 | 2433 | 3246 |
| MSTRG.18026.2  | coding    | 0.246      | 387  | 1005 | 1724 |
| MSTRG.18023.2  | coding    | 0.52       | 807  | 1980 | 2692 |
| MSTRG.18031.3  | coding    | 0.047      | 1275 | 2838 | 5411 |
| MSTRG.18031.4  | coding    | 0.047      | 1620 | 3183 | 5756 |
| MSTRG.18032.1  | noncoding | -0.012288  | 15   | 156  | 7259 |
| MSTRG.18033.1  | coding    | 0.104      | 1272 | 1464 | 5444 |
| MSTRG.18037.2  | coding    | 0.498      | 0    | 459  | 653  |
| MSTRG.18038.3  | coding    | 0.199      | 423  | 1680 | 2078 |
| MSTRG.18038.2  | coding    | 0.134      | 156  | 1506 | 1906 |
| MSTRG.18040.7  | noncoding | -0.0016384 | 1251 | 1494 | 2222 |
| MSTRG.18040.10 | coding    | 0.143      | 456  | 3519 | 4140 |
| MSTRG.18040.9  | coding    | 0.11       | 711  | 6738 | 7359 |
| MSTRG.18040.12 | coding    | 0.113      | 321  | 6081 | 6701 |
| MSTRG.18040.13 | coding    | 0.143      | 243  | 3306 | 3926 |
| MSTRG.18040.4  | coding    | 0.11       | 399  | 6459 | 7080 |
| MSTRG.18040.8  | coding    | 0.142      | 138  | 3237 | 3856 |
| MSTRG.18046.1  | noncoding | -0.0069632 | 180  | 423  | 874  |
| MSTRG.18050.1  | coding    | 0.107      | 0    | 918  | 1850 |
| MSTRG.18051.1  | noncoding | -0.02048   | 0    | 114  | 661  |
| MSTRG.18054.3  | coding    | 0.135      | 24   | 879  | 1081 |
| MSTRG.18052.1  | coding    | 0.128      | 72   | 948  | 1515 |
| MSTRG.18063.1  | coding    | 0.288      | 1959 | 3504 | 5196 |
| MSTRG.18063.2  | coding    | 0.295      | 285  | 1806 | 3456 |
| MSTRG.18063.3  | coding    | 0.288      | 1902 | 3447 | 5092 |
| MSTRG.18063.5  | coding    | 0.056      | 585  | 3366 | 5403 |
| MSTRG.18064.2  | coding    | 0.177      | 1071 | 1434 | 2219 |
| MSTRG.18066.7  | noncoding | -0.0978944 | 1605 | 1914 | 3359 |
| MSTRG.18066.5  | noncoding | -0.0770048 | 1665 | 1923 | 2455 |
| MSTRG.18066.6  | noncoding | -0.0815104 | 1605 | 1857 | 2389 |
| MSTRG.18060.1  | coding    | 0.307      | 0    | 2025 | 2199 |
| MSTRG.18068.1  | noncoding | -0.0487424 | 4482 | 4818 | 5040 |
| MSTRG.18068.3  | noncoding | -0.0487424 | 4575 | 4911 | 5133 |
| MSTRG.18068.4  | noncoding | -0.0487424 | 4461 | 4797 | 4995 |
| MSTRG.18069.1  | coding    | 0.474      | 918  | 3087 | 6546 |
| MSTRG.18069.2  | coding    | 0.403      | 8634 | 9072 | 9227 |
| MSTRG.18070.1  | noncoding | -0.049152  | 294  | 399  | 646  |
| MSTRG.18069.4  | coding    | 0.474      | 1341 | 3507 | 6966 |
| MSTRG.18069.5  | coding    | 0.417      | 537  | 3411 | 6869 |
| MSTRG.18073.1  | noncoding | -0.0569344 | 474  | 744  | 4657 |
| MSTRG.18072.2  | coding    | 0.447      | 0    | 1287 | 2974 |
| MSTRG.18072.4  | coding    | 0.427      | 1485 | 2799 | 2953 |
| MSTRG.18072.8  | coding    | 0.41       | 3162 | 4431 | 4586 |
| MSTRG.18074.2  | coding    | 0.35       | 141  | 1158 | 1398 |
| MSTRG.18093.6  | coding    | 0.189      | 1209 | 2313 | 3828 |
| MSTRG.18093.2  | coding    | 0.188      | 1002 | 1968 | 3481 |
| MSTRG.18093.4  | coding    | 0.186      | 207  | 1179 | 2694 |

|               |           |            |       |       |       |
|---------------|-----------|------------|-------|-------|-------|
| MSTRG.18093.8 | noncoding | -0.0188416 | 1743  | 1980  | 2388  |
| MSTRG.18095.4 | coding    | 0.136      | 960   | 1329  | 2310  |
| MSTRG.18098.1 | noncoding | -0.0462848 | 921   | 1074  | 2587  |
| MSTRG.18099.2 | coding    | 0.185      | 0     | 1767  | 5753  |
| MSTRG.18101.1 | noncoding | -0.028672  | 22284 | 22449 | 28351 |
| MSTRG.18101.2 | noncoding | -0.028672  | 10512 | 10677 | 12116 |
| MSTRG.18102.3 | coding    | 0.159      | 2130  | 2358  | 3086  |
| MSTRG.18103.1 | coding    | 0.051      | 3111  | 3282  | 8008  |
| MSTRG.18105.1 | noncoding | -0.065536  | 537   | 600   | 867   |
| MSTRG.18106.1 | noncoding | -0.012288  | 120   | 261   | 643   |
| MSTRG.18083.2 | coding    | 0.205      | 0     | 1053  | 2053  |
| MSTRG.18083.3 | noncoding | -0.1036288 | 8016  | 8328  | 24630 |
| MSTRG.18085.2 | noncoding | -0.0372736 | 21    | 213   | 368   |
| MSTRG.18089.1 | noncoding | -0.08192   | 696   | 780   | 2482  |
| MSTRG.18091.3 | noncoding | -0.063488  | 801   | 1134  | 1658  |
| MSTRG.18089.2 | noncoding | -0.0581632 | 1887  | 1917  | 2104  |
| MSTRG.18122.1 | noncoding | -0.0094208 | 0     | 81    | 510   |
| MSTRG.18129.1 | coding    | 0.607      | 0     | 3912  | 5864  |
| MSTRG.18130.3 | coding    | 0.437      | 198   | 3237  | 8799  |
| MSTRG.18130.4 | coding    | 0.437      | 282   | 3321  | 8832  |
| MSTRG.18131.5 | coding    | 0.385      | 4671  | 10152 | 10597 |
| MSTRG.18131.4 | coding    | 0.404      | 885   | 8940  | 9385  |
| MSTRG.18131.3 | coding    | 0.404      | 306   | 8361  | 8807  |
| MSTRG.18131.6 | coding    | 0.383      | 174   | 5256  | 7273  |
| MSTRG.18132.1 | noncoding | -0.0086016 | 0     | 120   | 785   |
| MSTRG.18135.1 | coding    | 0.472      | 87    | 3414  | 10626 |
| MSTRG.18137.1 | noncoding | -0.069632  | 90    | 165   | 516   |
| MSTRG.18137.2 | noncoding | -0.0139264 | 36    | 213   | 566   |
| MSTRG.18138.2 | noncoding | -0.0155648 | 654   | 825   | 981   |
| MSTRG.18138.1 | noncoding | -0.0155648 | 1059  | 1230  | 1386  |
| MSTRG.18148.9 | noncoding | -0.0176128 | 99    | 225   | 8654  |
| MSTRG.18149.1 | noncoding | -0.0065536 | 561   | 609   | 764   |
| MSTRG.18151.1 | noncoding | -0.0569344 | 225   | 471   | 3846  |
| MSTRG.18152.2 | coding    | 0.454      | 0     | 426   | 3924  |
| MSTRG.18152.3 | coding    | 0.253      | 0     | 978   | 2006  |
| MSTRG.18152.4 | coding    | 0.212      | 585   | 834   | 1928  |
| MSTRG.18153.1 | coding    | 0.303      | 1149  | 2574  | 5361  |
| MSTRG.18153.2 | coding    | 0.303      | 867   | 2292  | 4388  |
| MSTRG.18142.3 | coding    | 0.24       | 183   | 1572  | 1885  |
| MSTRG.18147.2 | coding    | 0.504      | 243   | 2316  | 2782  |
| MSTRG.18140.1 | noncoding | -0.045056  | 30    | 36    | 273   |
| MSTRG.18140.2 | noncoding | -0.045056  | 30    | 36    | 291   |
| MSTRG.18155.1 | noncoding | -0.0610304 | 2694  | 3021  | 16261 |
| MSTRG.18155.2 | noncoding | -0.0212992 | 3654  | 3858  | 4132  |
| MSTRG.18156.1 | noncoding | -0.0057344 | 4386  | 4518  | 8025  |
| MSTRG.18157.1 | noncoding | -0.0262144 | 2679  | 2793  | 6823  |
| MSTRG.18158.3 | noncoding | -0.012288  | 69    | 1434  | 1709  |
| MSTRG.18159.1 | noncoding | -0.0724992 | 0     | 477   | 2522  |
| MSTRG.18161.4 | coding    | 0.45       | 462   | 1338  | 2224  |
| MSTRG.18162.2 | coding    | 0.532      | 0     | 1344  | 4464  |
| MSTRG.18164.1 | coding    | 0.204      | 0     | 1314  | 1600  |
| MSTRG.18169.1 | coding    | 0.331      | 78    | 882   | 1154  |
| MSTRG.18170.3 | coding    | 0.488      | 0     | 528   | 1809  |
| MSTRG.18174.1 | coding    | 0.12       | 81    | 324   | 660   |

|                  |           |             |      |      |      |
|------------------|-----------|-------------|------|------|------|
| MSTRG. 18174. 5  | noncoding | -0. 0434176 | 48   | 333  | 626  |
| MSTRG. 18173. 1  | noncoding | -0. 0827392 | 234  | 633  | 789  |
| MSTRG. 18173. 2  | noncoding | -0. 0847872 | 234  | 651  | 807  |
| MSTRG. 18176. 2  | noncoding | -0. 049152  | 84   | 201  | 413  |
| MSTRG. 18177. 2  | noncoding | -0. 0208896 | 324  | 411  | 608  |
| MSTRG. 18183. 4  | coding    | 0. 194      | 117  | 735  | 1002 |
| MSTRG. 18191. 1  | noncoding | -0. 0786432 | 0    | 111  | 654  |
| MSTRG. 18191. 2  | noncoding | -0. 0221184 | 429  | 585  | 969  |
| MSTRG. 18191. 3  | noncoding | -0. 0151552 | 429  | 579  | 966  |
| MSTRG. 18191. 4  | noncoding | -0. 0475136 | 0    | 129  | 672  |
| MSTRG. 18185. 1  | noncoding | -0. 0323584 | 1422 | 1584 | 1947 |
| MSTRG. 18196. 2  | noncoding | -0. 0118784 | 327  | 627  | 1074 |
| MSTRG. 18196. 3  | noncoding | -0. 036864  | 198  | 270  | 631  |
| MSTRG. 18196. 4  | noncoding | -0. 004096  | 54   | 183  | 711  |
| MSTRG. 18198. 1  | noncoding | -0. 0176128 | 66   | 198  | 526  |
| MSTRG. 18200. 2  | noncoding | -0. 0425984 | 105  | 546  | 929  |
| MSTRG. 18200. 3  | noncoding | -0. 0425984 | 219  | 660  | 1041 |
| MSTRG. 18200. 4  | noncoding | -0. 0425984 | 132  | 573  | 955  |
| MSTRG. 18200. 5  | noncoding | -0. 0487424 | 0    | 171  | 697  |
| MSTRG. 18201. 2  | coding    | 0. 365      | 0    | 1008 | 1294 |
| MSTRG. 18219. 2  | coding    | 0. 434      | 708  | 4242 | 9443 |
| MSTRG. 18219. 1  | coding    | 0. 448      | 162  | 3618 | 8819 |
| MSTRG. 18219. 3  | coding    | 0. 448      | 135  | 3591 | 4989 |
| MSTRG. 18219. 4  | coding    | 0. 449      | 0    | 3456 | 5252 |
| MSTRG. 18219. 5  | coding    | 0. 466      | 0    | 3312 | 4984 |
| MSTRG. 18219. 6  | coding    | 0. 446      | 135  | 3594 | 5348 |
| MSTRG. 18219. 8  | coding    | 0. 458      | 405  | 3060 | 4705 |
| MSTRG. 18210. 1  | noncoding | -0. 0352256 | 1266 | 1860 | 2013 |
| MSTRG. 18211. 4  | coding    | 0. 275      | 360  | 1983 | 2415 |
| MSTRG. 18212. 2  | coding    | 0. 166      | 2526 | 3165 | 3351 |
| MSTRG. 18214. 1  | noncoding | -0. 331776  | 0    | 417  | 1397 |
| MSTRG. 18214. 2  | noncoding | -0. 1908736 | 0    | 249  | 981  |
| MSTRG. 18215. 1  | noncoding | -0. 0512    | 903  | 1107 | 3727 |
| MSTRG. 18220. 2  | coding    | 0. 506      | 1167 | 2838 | 4160 |
| MSTRG. 18226. 2  | coding    | 0. 733      | 0    | 264  | 1446 |
| MSTRG. 18229. 2  | coding    | 0. 286      | 342  | 4089 | 5533 |
| MSTRG. 18229. 1  | coding    | 0. 29       | 345  | 4017 | 5462 |
| MSTRG. 18229. 5  | coding    | 0. 275      | 69   | 3963 | 5376 |
| MSTRG. 18234. 1  | noncoding | -0. 024576  | 150  | 282  | 822  |
| MSTRG. 18240. 1  | coding    | 0. 13       | 243  | 4440 | 7884 |
| MSTRG. 18240. 8  | coding    | 0. 13       | 291  | 4491 | 5882 |
| MSTRG. 18240. 7  | coding    | 0. 13       | 234  | 4431 | 6065 |
| MSTRG. 18240. 9  | coding    | 0. 13       | 252  | 4449 | 7894 |
| MSTRG. 18240. 10 | coding    | 0. 13       | 162  | 4359 | 7805 |
| MSTRG. 18240. 11 | coding    | 0. 13       | 654  | 4854 | 6245 |
| MSTRG. 18241. 1  | coding    | 0. 042      | 2151 | 2667 | 4038 |
| MSTRG. 18240. 12 | coding    | 0. 13       | 2835 | 7032 | 8425 |
| MSTRG. 18242. 2  | coding    | 0. 482      | 132  | 2724 | 4454 |
| MSTRG. 18242. 4  | coding    | 0. 506      | 153  | 2235 | 3021 |
| MSTRG. 18245. 1  | noncoding | -0. 012288  | 492  | 678  | 2441 |
| MSTRG. 18245. 2  | noncoding | -0. 069632  | 378  | 438  | 593  |
| MSTRG. 18238. 2  | coding    | 0. 309      | 501  | 5646 | 7298 |
| MSTRG. 18239. 1  | noncoding | -0. 0720896 | 30   | 423  | 4900 |
| MSTRG. 18246. 2  | coding    | 0. 068      | 432  | 1641 | 4000 |



|                |           |            |       |       |       |
|----------------|-----------|------------|-------|-------|-------|
| MSTRG.18246.3  | coding    | 0.031      | 1827  | 3861  | 4608  |
| MSTRG.18252.2  | coding    | 0.505      | 0     | 2199  | 2366  |
| MSTRG.18253.2  | coding    | 0.29       | 852   | 6420  | 7425  |
| MSTRG.18251.1  | noncoding | -0.0241664 | 141   | 360   | 1325  |
| MSTRG.18259.2  | coding    | 0.344      | 0     | 1122  | 3579  |
| MSTRG.18261.1  | noncoding | -0.065536  | 597   | 918   | 2329  |
| MSTRG.18269.10 | noncoding | -0.045056  | 1563  | 1650  | 1803  |
| MSTRG.18269.8  | noncoding | -0.053248  | 1596  | 1680  | 1835  |
| MSTRG.18269.6  | noncoding | -0.0004096 | 1599  | 1710  | 1866  |
| MSTRG.18269.13 | noncoding | -0.0344064 | 2598  | 2904  | 3147  |
| MSTRG.18269.3  | noncoding | -0.0557056 | 1599  | 1959  | 4915  |
| MSTRG.18269.7  | noncoding | -0.0278528 | 1794  | 1908  | 3631  |
| MSTRG.18269.11 | noncoding | -0.0004096 | 1407  | 1479  | 1674  |
| MSTRG.18269.12 | noncoding | -0.0888832 | 1821  | 2235  | 2389  |
| MSTRG.18269.1  | coding    | 0.503      | 0     | 738   | 3606  |
| MSTRG.18269.14 | coding    | 0.503      | 0     | 738   | 3027  |
| MSTRG.18269.2  | coding    | 0.503      | 0     | 738   | 5475  |
| MSTRG.18269.4  | coding    | 0.503      | 0     | 738   | 3603  |
| MSTRG.18269.5  | coding    | 0.503      | 0     | 738   | 3030  |
| MSTRG.18269.9  | coding    | 0.503      | 0     | 738   | 3454  |
| MSTRG.18275.1  | noncoding | -0.014336  | 5013  | 5196  | 7220  |
| MSTRG.18276.4  | noncoding | -0.0937984 | 0     | 189   | 5117  |
| MSTRG.18276.3  | noncoding | -0.063488  | 0     | 141   | 5010  |
| MSTRG.18277.1  | coding    | 0.454      | 294   | 3150  | 4451  |
| MSTRG.18277.4  | coding    | 0.268      | 21    | 2772  | 4069  |
| MSTRG.18278.1  | noncoding | -0.0110592 | 297   | 684   | 1028  |
| MSTRG.18270.2  | coding    | 0.528      | 0     | 960   | 2441  |
| MSTRG.18274.1  | noncoding | -0.0303104 | 69    | 261   | 688   |
| MSTRG.18274.2  | noncoding | -0.0344064 | 570   | 1656  | 1988  |
| MSTRG.18274.3  | noncoding | -0.0606208 | 1635  | 1896  | 2661  |
| MSTRG.18274.4  | noncoding | -0.0638976 | 321   | 555   | 1039  |
| MSTRG.18273.2  | coding    | 0.364      | 390   | 753   | 1332  |
| MSTRG.18292.2  | coding    | 0.518      | 0     | 3204  | 7125  |
| MSTRG.18292.3  | coding    | 0.52       | 0     | 3123  | 6464  |
| MSTRG.18294.2  | coding    | 0.373      | 9     | 738   | 1089  |
| MSTRG.18294.5  | coding    | 0.547      | 0     | 1422  | 1577  |
| MSTRG.18329.1  | noncoding | -0.0086016 | 2169  | 2364  | 2518  |
| MSTRG.18346.1  | noncoding | -0.0516096 | 2037  | 2388  | 2543  |
| MSTRG.18346.2  | noncoding | -0.106496  | 0     | 135   | 1702  |
| MSTRG.18346.3  | noncoding | -0.0925696 | 1068  | 1632  | 2094  |
| MSTRG.18347.1  | noncoding | -0.0503808 | 4992  | 5238  | 8711  |
| MSTRG.18348.1  | coding    | 0.397      | 726   | 3921  | 12025 |
| MSTRG.18348.2  | noncoding | -0.0913408 | 4572  | 4968  | 5680  |
| MSTRG.18349.1  | noncoding | -0.049152  | 23001 | 23325 | 35431 |
| MSTRG.18350.1  | noncoding | -0.057344  | 44856 | 45321 | 48418 |
| MSTRG.18350.2  | noncoding | -0.0323584 | 42198 | 42705 | 45333 |
| MSTRG.18350.3  | noncoding | -0.0397312 | 20793 | 21378 | 22085 |
| MSTRG.18351.1  | noncoding | -0.0262144 | 19650 | 19866 | 35960 |
| MSTRG.18348.3  | coding    | 0.362      | 231   | 3747  | 11824 |
| MSTRG.18352.1  | noncoding | -0.0516096 | 2562  | 3075  | 9884  |
| MSTRG.18353.1  | noncoding | -0.0360448 | 1197  | 1677  | 1834  |
| MSTRG.18354.1  | noncoding | -0.0217088 | 387   | 816   | 8440  |
| MSTRG.18355.1  | noncoding | -0.026624  | 183   | 372   | 783   |
| MSTRG.18297.2  | coding    | 0.418      | 474   | 3087  | 5448  |

|               |           |            |      |      |      |
|---------------|-----------|------------|------|------|------|
| MSTRG.18297.3 | coding    | 0.427      | 570  | 3495 | 5558 |
| MSTRG.18297.6 | coding    | 0.35       | 0    | 2649 | 2805 |
| MSTRG.18297.5 | coding    | 0.407      | 351  | 2553 | 2709 |
| MSTRG.18299.2 | noncoding | -0.0032768 | 627  | 729  | 1395 |
| MSTRG.18299.3 | noncoding | -0.0483328 | 684  | 972  | 7226 |
| MSTRG.18304.1 | noncoding | -0.047104  | 174  | 285  | 489  |
| MSTRG.18306.2 | coding    | 0.122      | 1122 | 1374 | 1784 |
| MSTRG.18306.3 | coding    | 0.136      | 555  | 900  | 1057 |
| MSTRG.18307.1 | noncoding | -0.0536576 | 438  | 681  | 835  |
| MSTRG.18321.1 | noncoding | -0.0434176 | 117  | 312  | 2454 |
| MSTRG.18369.2 | coding    | 0.408      | 468  | 1266 | 1422 |
| MSTRG.18369.5 | coding    | 0.471      | 0    | 744  | 899  |
| MSTRG.18369.4 | coding    | 0.408      | 300  | 1098 | 1254 |
| MSTRG.18369.3 | coding    | 0.408      | 342  | 1140 | 1295 |
| MSTRG.18371.2 | noncoding | -0.0507904 | 0    | 639  | 1762 |
| MSTRG.18373.1 | noncoding | -0.12288   | 669  | 756  | 1884 |
| MSTRG.18378.2 | coding    | 0.44       | 528  | 1968 | 2185 |
| MSTRG.18379.6 | coding    | 0.532      | 696  | 2565 | 2795 |
| MSTRG.18381.3 | coding    | 0.314      | 660  | 2220 | 2990 |
| MSTRG.18381.4 | coding    | 0.365      | 0    | 2268 | 3034 |
| MSTRG.18382.3 | coding    | 0.428      | 7419 | 8493 | 8668 |
| MSTRG.18382.4 | coding    | 0.452      | 0    | 579  | 1445 |
| MSTRG.18383.3 | coding    | 0.292      | 0    | 1470 | 1640 |
| MSTRG.18383.1 | coding    | 0.279      | 888  | 2379 | 2751 |
| MSTRG.18386.1 | coding    | 0.411      | 0    | 822  | 977  |
| MSTRG.18386.2 | coding    | 0.397      | 0    | 690  | 845  |
| MSTRG.18398.5 | coding    | 0.522      | 0    | 1749 | 2072 |
| MSTRG.18400.4 | coding    | 0.457      | 2181 | 3996 | 4153 |
| MSTRG.18400.3 | coding    | 0.461      | 0    | 5271 | 5428 |
| MSTRG.18400.5 | coding    | 0.471      | 1266 | 6318 | 6473 |
| MSTRG.18400.7 | coding    | 0.472      | 33   | 5019 | 5173 |
| MSTRG.18400.6 | coding    | 0.468      | 87   | 5160 | 5316 |
| MSTRG.18400.9 | coding    | 0.462      | 33   | 4062 | 4215 |
| MSTRG.18401.1 | noncoding | -0.03072   | 3999 | 4209 | 5608 |
| MSTRG.18405.1 | noncoding | -0.0847872 | 1233 | 3078 | 3768 |
| MSTRG.18406.1 | coding    | 0.425      | 0    | 4875 | 5102 |
| MSTRG.18408.1 | noncoding | -0.0790528 | 0    | 1599 | 2274 |
| MSTRG.18408.3 | coding    | 0.2        | 0    | 1266 | 1521 |
| MSTRG.18408.4 | noncoding | -0.0724992 | 114  | 1341 | 1594 |
| MSTRG.18413.2 | coding    | 0.528      | 0    | 1950 | 3660 |
| MSTRG.18413.3 | coding    | 0.505      | 0    | 1752 | 3431 |
| MSTRG.18414.1 | coding    | 0.371      | 6    | 1668 | 2180 |
| MSTRG.18416.4 | coding    | 0.389      | 42   | 1920 | 2075 |
| MSTRG.18416.5 | coding    | 0.462      | 870  | 1857 | 2011 |
| MSTRG.18416.6 | coding    | 0.37       | 540  | 1659 | 1814 |
| MSTRG.18417.1 | coding    | 0.377      | 408  | 1842 | 2210 |
| MSTRG.18417.3 | coding    | 0.257      | 15   | 1236 | 1606 |
| MSTRG.18433.6 | coding    | 0.481      | 1905 | 3558 | 3746 |
| MSTRG.18433.7 | coding    | 0.496      | 0    | 1638 | 1824 |
| MSTRG.18434.3 | coding    | 0.554      | 0    | 4626 | 4921 |
| MSTRG.18435.1 | coding    | 0.633      | 315  | 1950 | 2107 |
| MSTRG.18435.2 | coding    | 0.59       | 315  | 1245 | 1967 |
| MSTRG.18438.1 | noncoding | -0.0249856 | 3855 | 4440 | 4595 |
| MSTRG.18438.2 | noncoding | -0.0561152 | 231  | 519  | 1179 |

|                  |           |             |      |       |       |
|------------------|-----------|-------------|------|-------|-------|
| MSTRG. 18447. 3  | coding    | 0. 489      | 2724 | 4578  | 4731  |
| MSTRG. 18448. 1  | noncoding | -0. 0397312 | 0    | 543   | 697   |
| MSTRG. 18448. 2  | noncoding | -0. 0774144 | 0    | 255   | 409   |
| MSTRG. 18447. 5  | coding    | 0. 455      | 180  | 2319  | 2472  |
| MSTRG. 18424. 4  | coding    | 0. 336      | 114  | 2070  | 2643  |
| MSTRG. 18424. 3  | coding    | 0. 351      | 0    | 3195  | 3362  |
| MSTRG. 18424. 2  | coding    | 0. 35       | 0    | 3150  | 3320  |
| MSTRG. 18425. 1  | noncoding | -0. 1089536 | 1512 | 2565  | 5212  |
| MSTRG. 18425. 2  | noncoding | -0. 0954368 | 588  | 2274  | 2933  |
| MSTRG. 18425. 4  | coding    | 0. 266      | 402  | 1455  | 1996  |
| MSTRG. 18425. 3  | coding    | 0. 246      | 117  | 1209  | 1751  |
| MSTRG. 18428. 3  | coding    | 0. 44       | 0    | 1239  | 1585  |
| MSTRG. 18428. 2  | coding    | 0. 414      | 2091 | 3318  | 3666  |
| MSTRG. 18428. 4  | noncoding | -0. 0458752 | 2457 | 3417  | 4361  |
| MSTRG. 18428. 5  | noncoding | -0. 0458752 | 2397 | 3357  | 4301  |
| MSTRG. 18452. 2  | noncoding | -0. 028672  | 507  | 612   | 873   |
| MSTRG. 18449. 1  | noncoding | -0. 0462848 | 0    | 96    | 627   |
| MSTRG. 18449. 2  | noncoding | -0. 024576  | 162  | 267   | 506   |
| MSTRG. 18453. 2  | noncoding | -0. 034816  | 357  | 1161  | 1897  |
| MSTRG. 18454. 2  | noncoding | -0. 0339968 | 405  | 2223  | 3039  |
| MSTRG. 18454. 1  | noncoding | -0. 0303104 | 123  | 2301  | 3119  |
| MSTRG. 18454. 3  | noncoding | -0. 0294912 | 0    | 2172  | 2989  |
| MSTRG. 18459. 1  | noncoding | -0. 0364544 | 858  | 7335  | 7520  |
| MSTRG. 18462. 1  | coding    | 0. 474      | 129  | 2688  | 2843  |
| MSTRG. 18462. 5  | coding    | 0. 488      | 750  | 3684  | 3838  |
| MSTRG. 18462. 7  | coding    | 0. 434      | 249  | 3051  | 3204  |
| MSTRG. 18455. 1  | coding    | 0. 51       | 0    | 2397  | 2553  |
| MSTRG. 18464. 1  | noncoding | -0. 1978368 | 0    | 396   | 549   |
| MSTRG. 18466. 1  | noncoding | -0. 0659456 | 201  | 645   | 1187  |
| MSTRG. 18465. 3  | coding    | 0. 517      | 24   | 3861  | 4014  |
| MSTRG. 18465. 2  | coding    | 0. 519      | 24   | 3894  | 4816  |
| MSTRG. 18465. 5  | coding    | 0. 491      | 15   | 4062  | 4974  |
| MSTRG. 18465. 4  | coding    | 0. 517      | 15   | 3891  | 5141  |
| MSTRG. 18468. 2  | coding    | 0. 48       | 45   | 1323  | 1754  |
| MSTRG. 18470. 4  | coding    | 0. 57       | 3315 | 5115  | 5591  |
| MSTRG. 18470. 6  | coding    | 0. 302      | 2901 | 3183  | 4117  |
| MSTRG. 18470. 8  | noncoding | -0. 0200704 | 252  | 663   | 1720  |
| MSTRG. 18470. 9  | coding    | 0. 462      | 9852 | 12468 | 15568 |
| MSTRG. 18470. 11 | noncoding | -0. 0724992 | 4818 | 5202  | 6589  |
| MSTRG. 18469. 2  | coding    | 0. 425      | 0    | 3903  | 5325  |
| MSTRG. 18477. 2  | coding    | 0. 352      | 243  | 3387  | 4439  |
| MSTRG. 18477. 1  | coding    | 0. 351      | 273  | 3528  | 4582  |
| MSTRG. 18477. 3  | coding    | 0. 361      | 237  | 3243  | 4299  |
| MSTRG. 18477. 4  | coding    | 0. 304      | 231  | 2844  | 7177  |
| MSTRG. 18477. 5  | coding    | 0. 351      | 231  | 3396  | 4448  |
| MSTRG. 18477. 6  | coding    | 0. 348      | 222  | 3375  | 4429  |
| MSTRG. 18477. 7  | coding    | 0. 351      | 468  | 3621  | 4675  |
| MSTRG. 18477. 8  | coding    | 0. 361      | 216  | 3243  | 4296  |
| MSTRG. 18477. 9  | coding    | 0. 36       | 426  | 3468  | 4521  |
| MSTRG. 18477. 10 | coding    | 0. 342      | 225  | 3120  | 4175  |
| MSTRG. 18477. 11 | noncoding | -0. 053248  | 39   | 117   | 768   |
| MSTRG. 18477. 12 | coding    | 0. 389      | 2721 | 5241  | 6296  |
| MSTRG. 18478. 1  | noncoding | -0. 0598016 | 3741 | 3966  | 6460  |
| MSTRG. 18477. 14 | coding    | 0. 483      | 3996 | 4749  | 5802  |

|                  |           |             |       |       |       |
|------------------|-----------|-------------|-------|-------|-------|
| MSTRG. 18479. 1  | noncoding | -0. 034816  | 69    | 420   | 836   |
| MSTRG. 18479. 2  | noncoding | -0. 034816  | 69    | 420   | 974   |
| MSTRG. 18472. 8  | coding    | 0. 257      | 0     | 3120  | 14759 |
| MSTRG. 18473. 1  | noncoding | -0. 0339968 | 159   | 468   | 1321  |
| MSTRG. 18472. 12 | coding    | 0. 473      | 396   | 1713  | 5410  |
| MSTRG. 18474. 2  | noncoding | -0. 0126976 | 447   | 603   | 1254  |
| MSTRG. 18481. 1  | coding    | 0. 457      | 411   | 3408  | 4077  |
| MSTRG. 18482. 1  | noncoding | -0. 094208  | 114   | 183   | 1377  |
| MSTRG. 18483. 2  | noncoding | -0. 0299008 | 564   | 717   | 986   |
| MSTRG. 18484. 1  | noncoding | -0. 1212416 | 564   | 870   | 1521  |
| MSTRG. 18484. 2  | noncoding | -0. 1212416 | 564   | 870   | 1625  |
| MSTRG. 18484. 3  | noncoding | -0. 0454656 | 735   | 1152  | 1307  |
| MSTRG. 18480. 2  | coding    | 0. 537      | 405   | 1191  | 2491  |
| MSTRG. 18485. 1  | noncoding | -0. 032768  | 120   | 201   | 357   |
| MSTRG. 18487. 1  | noncoding | -0. 0499712 | 759   | 954   | 1130  |
| MSTRG. 18487. 2  | noncoding | -0. 0823296 | 3825  | 4200  | 4355  |
| MSTRG. 18492. 2  | coding    | 0. 277      | 81    | 3651  | 3805  |
| MSTRG. 18490. 1  | noncoding | -0. 0356352 | 0     | 153   | 380   |
| MSTRG. 18499. 2  | coding    | 0. 193      | 0     | 918   | 1420  |
| MSTRG. 18500. 1  | noncoding | -0. 008192  | 174   | 696   | 1521  |
| MSTRG. 18504. 1  | coding    | 0. 089      | 933   | 1176  | 1778  |
| MSTRG. 18507. 4  | noncoding | -0. 04096   | 4458  | 4569  | 10368 |
| MSTRG. 18507. 5  | noncoding | -0. 110592  | 1176  | 1248  | 1520  |
| MSTRG. 18507. 6  | noncoding | -0. 045056  | 1086  | 1197  | 3643  |
| MSTRG. 18508. 2  | noncoding | -0. 0438272 | 171   | 1092  | 3386  |
| MSTRG. 18508. 3  | noncoding | -0. 043008  | 174   | 576   | 2842  |
| MSTRG. 18511. 1  | coding    | 0. 415      | 1014  | 2088  | 6354  |
| MSTRG. 18511. 2  | coding    | 0. 415      | 984   | 2058  | 2626  |
| MSTRG. 18511. 3  | coding    | 0. 415      | 1116  | 2190  | 2756  |
| MSTRG. 18511. 4  | coding    | 0. 415      | 1068  | 2142  | 2710  |
| MSTRG. 18513. 3  | coding    | 0. 309      | 0     | 897   | 2986  |
| MSTRG. 18513. 2  | coding    | 0. 355      | 213   | 708   | 2799  |
| MSTRG. 18516. 2  | coding    | 0. 096      | 483   | 3369  | 8897  |
| MSTRG. 18516. 5  | coding    | 0. 108      | 285   | 3141  | 8620  |
| MSTRG. 18517. 1  | noncoding | -0. 0217088 | 156   | 234   | 1208  |
| MSTRG. 18514. 2  | coding    | 0. 195      | 432   | 1119  | 1449  |
| MSTRG. 18514. 3  | coding    | 0. 152      | 432   | 1041  | 1371  |
| MSTRG. 18514. 4  | coding    | 0. 22       | 0     | 1269  | 1598  |
| MSTRG. 18519. 1  | noncoding | -0. 0004096 | 0     | 0     | 291   |
| MSTRG. 18524. 1  | coding    | 0. 12       | 123   | 2550  | 3788  |
| MSTRG. 18524. 2  | coding    | 0. 118      | 105   | 2430  | 4564  |
| MSTRG. 18524. 4  | coding    | 0. 083      | 330   | 2364  | 3074  |
| MSTRG. 18527. 1  | coding    | 0. 426      | 0     | 3324  | 3478  |
| MSTRG. 18527. 2  | noncoding | -0. 0090112 | 237   | 339   | 823   |
| MSTRG. 18529. 3  | coding    | 0. 137      | 0     | 1014  | 1765  |
| MSTRG. 18529. 5  | coding    | 0. 058      | 306   | 1146  | 1705  |
| MSTRG. 18529. 4  | coding    | 0. 074      | 243   | 1083  | 1715  |
| MSTRG. 18530. 1  | noncoding | -0. 0258048 | 10491 | 10770 | 10927 |
| MSTRG. 18530. 2  | noncoding | -0. 018432  | 5811  | 5937  | 10540 |
| MSTRG. 18531. 1  | noncoding | -0. 094208  | 3789  | 3882  | 5922  |
| MSTRG. 18536. 1  | noncoding | -0. 0004096 | 0     | 0     | 344   |
| MSTRG. 18538. 1  | noncoding | -0. 176128  | 183   | 210   | 402   |
| MSTRG. 18540. 1  | noncoding | -0. 086016  | 198   | 216   | 506   |
| MSTRG. 18600. 2  | noncoding | -0. 018432  | 2664  | 2802  | 3561  |

|                |           |            |       |       |       |
|----------------|-----------|------------|-------|-------|-------|
| MSTRG.18614.1  | coding    | 0.117      | 282   | 474   | 1473  |
| MSTRG.18615.1  | noncoding | -0.02048   | 1773  | 1902  | 2606  |
| MSTRG.18626.2  | noncoding | -0.0004096 | 195   | 408   | 1870  |
| MSTRG.18622.6  | noncoding | -0.0253952 | 2271  | 2520  | 11406 |
| MSTRG.18622.7  | noncoding | -0.135168  | 2607  | 2655  | 5465  |
| MSTRG.18631.2  | noncoding | -0.0782336 | 7398  | 8520  | 12067 |
| MSTRG.18631.3  | noncoding | -0.311296  | 2652  | 2685  | 3117  |
| MSTRG.18632.1  | noncoding | -0.024576  | 1329  | 1431  | 4823  |
| MSTRG.18631.4  | noncoding | -0.0782336 | 4146  | 5268  | 15388 |
| MSTRG.18633.1  | noncoding | -0.0004096 | 0     | 0     | 392   |
| MSTRG.18622.8  | noncoding | -0.1441792 | 1278  | 2049  | 5055  |
| MSTRG.18622.14 | noncoding | -0.1425408 | 1329  | 2073  | 3281  |
| MSTRG.18631.6  | coding    | 0.239      | 5430  | 6189  | 6342  |
| MSTRG.18631.7  | noncoding | -0.06144   | 0     | 78    | 233   |
| MSTRG.18622.16 | noncoding | -0.0049152 | 12    | 153   | 308   |
| MSTRG.18622.17 | noncoding | -0.0372736 | 576   | 759   | 7428  |
| MSTRG.18631.9  | noncoding | -0.0782336 | 1407  | 2529  | 3402  |
| MSTRG.18631.8  | coding    | 0.231      | 525   | 2562  | 3981  |
| MSTRG.18622.20 | noncoding | -0.012288  | 768   | 888   | 4796  |
| MSTRG.18622.21 | noncoding | -0.012288  | 762   | 882   | 4790  |
| MSTRG.18622.22 | noncoding | -0.049152  | 684   | 723   | 1218  |
| MSTRG.18631.10 | coding    | 0.261      | 525   | 2070  | 2225  |
| MSTRG.18622.34 | noncoding | -0.1441792 | 4728  | 5499  | 6660  |
| MSTRG.18638.1  | noncoding | -0.057344  | 9     | 114   | 268   |
| MSTRG.18637.1  | noncoding | -0.004096  | 3     | 147   | 301   |
| MSTRG.18542.3  | coding    | 0.556      | 141   | 1131  | 4476  |
| MSTRG.18546.4  | coding    | 0.149      | 0     | 861   | 1014  |
| MSTRG.18546.5  | noncoding | -0.0401408 | 20637 | 20871 | 28286 |
| MSTRG.18546.6  | coding    | 0.109      | 1299  | 1479  | 38258 |
| MSTRG.18546.7  | coding    | 0.031      | 237   | 492   | 4448  |
| MSTRG.18546.8  | coding    | 0.047      | 237   | 642   | 22046 |
| MSTRG.18546.9  | coding    | 0.054      | 237   | 633   | 20728 |
| MSTRG.18546.10 | coding    | 0.101      | 0     | 537   | 13940 |
| MSTRG.18546.11 | coding    | 0.116      | 0     | 396   | 2401  |
| MSTRG.18546.12 | noncoding | -0.0356352 | 18822 | 19044 | 26496 |
| MSTRG.18546.13 | coding    | 0.101      | 0     | 537   | 8816  |
| MSTRG.18546.14 | coding    | 0.098      | 0     | 654   | 5964  |
| MSTRG.18548.2  | noncoding | -0.02048   | 12    | 192   | 356   |
| MSTRG.18551.1  | noncoding | -0.12288   | 5511  | 5577  | 7390  |
| MSTRG.18552.1  | noncoding | -0.0393216 | 7680  | 7968  | 12535 |
| MSTRG.18552.2  | noncoding | -0.034816  | 2982  | 3183  | 4090  |
| MSTRG.18555.1  | coding    | 0.313      | 180   | 2460  | 5472  |
| MSTRG.18555.2  | coding    | 0.313      | 432   | 2712  | 4808  |
| MSTRG.18557.4  | coding    | 0.444      | 0     | 198   | 1232  |
| MSTRG.18558.1  | noncoding | -0.0577536 | 396   | 414   | 2857  |
| MSTRG.18559.1  | noncoding | -0.0749568 | 0     | 660   | 3464  |
| MSTRG.18559.4  | coding    | 0.023      | 1242  | 1851  | 5866  |
| MSTRG.18559.6  | noncoding | -0.0749568 | 0     | 660   | 5119  |
| MSTRG.18561.1  | coding    | 0.102      | 18    | 2349  | 4210  |
| MSTRG.18561.3  | coding    | 0.045      | 93    | 456   | 3157  |
| MSTRG.18562.1  | coding    | 0.36       | 441   | 906   | 1327  |
| MSTRG.18562.2  | coding    | 0.36       | 525   | 990   | 1372  |
| MSTRG.18562.3  | coding    | 0.356      | 201   | 1113  | 1733  |
| MSTRG.18563.1  | noncoding | -0.012288  | 237   | 327   | 497   |

|                  |           |             |       |       |       |
|------------------|-----------|-------------|-------|-------|-------|
| MSTRG. 18564. 1  | coding    | 0. 24       | 0     | 1794  | 7457  |
| MSTRG. 18564. 2  | coding    | 0. 256      | 0     | 1383  | 6822  |
| MSTRG. 18565. 1  | coding    | 0. 232      | 0     | 546   | 3362  |
| MSTRG. 18565. 2  | coding    | 0. 21       | 66    | 1107  | 1565  |
| MSTRG. 18568. 1  | coding    | 0. 099      | 75    | 4329  | 5095  |
| MSTRG. 18568. 3  | coding    | 0. 273      | 0     | 897   | 2548  |
| MSTRG. 18568. 6  | coding    | 0. 241      | 801   | 1296  | 2854  |
| MSTRG. 18572. 1  | coding    | 0. 083      | 528   | 3108  | 4791  |
| MSTRG. 18572. 4  | coding    | 0. 083      | 972   | 3552  | 5236  |
| MSTRG. 18574. 4  | coding    | 0. 096      | 1647  | 2799  | 3179  |
| MSTRG. 18574. 5  | coding    | 0. 096      | 1746  | 2898  | 3276  |
| MSTRG. 18574. 6  | coding    | 0. 094      | 1860  | 3009  | 3389  |
| MSTRG. 18574. 7  | noncoding | -0. 0172032 | 3900  | 4053  | 7799  |
| MSTRG. 18567. 2  | noncoding | -0. 0176128 | 2007  | 2139  | 3083  |
| MSTRG. 18589. 1  | noncoding | -0. 0004096 | 0     | 0     | 215   |
| MSTRG. 18590. 1  | noncoding | -0. 0004096 | 0     | 168   | 327   |
| MSTRG. 18594. 2  | coding    | 0. 192      | 0     | 540   | 1117  |
| MSTRG. 18594. 3  | coding    | 0. 141      | 141   | 387   | 679   |
| MSTRG. 18594. 5  | coding    | 0. 144      | 342   | 837   | 1130  |
| MSTRG. 18594. 6  | coding    | 0. 163      | 264   | 468   | 1043  |
| MSTRG. 18594. 7  | coding    | 0. 079      | 0     | 642   | 935   |
| MSTRG. 18654. 3  | noncoding | -0. 0802816 | 5301  | 5637  | 5915  |
| MSTRG. 18654. 4  | coding    | 0. 309      | 360   | 12819 | 15740 |
| MSTRG. 18656. 1  | noncoding | -0. 024576  | 594   | 729   | 919   |
| MSTRG. 18645. 1  | noncoding | -0. 04096   | 3666  | 3786  | 4533  |
| MSTRG. 18647. 2  | coding    | 0. 348      | 0     | 570   | 980   |
| MSTRG. 18653. 1  | noncoding | -0. 08192   | 27    | 30    | 387   |
| MSTRG. 18659. 1  | coding    | 0. 306      | 0     | 852   | 1157  |
| MSTRG. 18659. 5  | coding    | 0. 042      | 13380 | 13539 | 18100 |
| MSTRG. 18662. 5  | coding    | 0. 261      | 291   | 4977  | 6008  |
| MSTRG. 18662. 3  | coding    | 0. 245      | 0     | 5454  | 6485  |
| MSTRG. 18666. 8  | coding    | 0. 099      | 855   | 1377  | 3171  |
| MSTRG. 18666. 9  | coding    | 0. 069      | 897   | 1140  | 3286  |
| MSTRG. 18666. 4  | coding    | 0. 158      | 0     | 405   | 2550  |
| MSTRG. 18666. 5  | coding    | 0. 069      | 294   | 537   | 2681  |
| MSTRG. 18666. 6  | coding    | 0. 082      | 171   | 513   | 2658  |
| MSTRG. 18666. 7  | coding    | 0. 069      | 249   | 492   | 2638  |
| MSTRG. 18666. 10 | coding    | 0. 101      | 720   | 1341  | 3084  |
| MSTRG. 18667. 2  | coding    | 0. 239      | 501   | 1500  | 2438  |
| MSTRG. 18677. 1  | noncoding | -0. 0151552 | 285   | 489   | 1917  |
| MSTRG. 18679. 3  | noncoding | -0. 0135168 | 45    | 216   | 380   |
| MSTRG. 18681. 1  | noncoding | -0. 016384  | 189   | 267   | 423   |
| MSTRG. 18684. 2  | coding    | 0. 356      | 0     | 924   | 1376  |
| MSTRG. 18685. 1  | noncoding | -0. 053248  | 0     | 45    | 632   |
| MSTRG. 18698. 1  | noncoding | -0. 016384  | 3372  | 3447  | 3602  |
| MSTRG. 18697. 4  | coding    | 0. 243      | 246   | 939   | 1663  |
| MSTRG. 18702. 2  | coding    | 0. 208      | 5901  | 6615  | 8823  |
| MSTRG. 18703. 1  | noncoding | -0. 0036864 | 1932  | 2082  | 3072  |
| MSTRG. 18704. 1  | noncoding | -0. 0315392 | 3492  | 3615  | 5259  |
| MSTRG. 18705. 1  | noncoding | -0. 110592  | 420   | 471   | 1209  |
| MSTRG. 18706. 1  | noncoding | -0. 0536576 | 1536  | 1761  | 7080  |
| MSTRG. 18707. 1  | noncoding | -0. 057344  | 51    | 66    | 8950  |
| MSTRG. 18709. 2  | coding    | 0. 231      | 126   | 999   | 11646 |
| MSTRG. 18709. 3  | noncoding | -0. 1056768 | 126   | 576   | 8951  |

|                 |           |             |       |       |       |
|-----------------|-----------|-------------|-------|-------|-------|
| MSTRG. 18709. 4 | coding    | 0. 339      | 123   | 522   | 12331 |
| MSTRG. 18711. 4 | coding    | 0. 122      | 0     | 504   | 1738  |
| MSTRG. 18713. 1 | noncoding | -0. 0208896 | 75    | 162   | 547   |
| MSTRG. 18715. 2 | coding    | 0. 11       | 0     | 744   | 900   |
| MSTRG. 18715. 4 | coding    | 0. 317      | 189   | 1794  | 1950  |
| MSTRG. 18722. 1 | noncoding | -0. 0393216 | 0     | 489   | 898   |
| MSTRG. 18725. 6 | coding    | 0. 171      | 2880  | 4086  | 6350  |
| MSTRG. 18725. 7 | coding    | 0. 177      | 1278  | 2592  | 5857  |
| MSTRG. 18726. 1 | noncoding | -0. 0028672 | 426   | 606   | 852   |
| MSTRG. 18718. 1 | noncoding | -0. 004096  | 363   | 522   | 2496  |
| MSTRG. 18732. 2 | noncoding | -0. 0258048 | 2616  | 2757  | 5817  |
| MSTRG. 18733. 1 | noncoding | -0. 0565248 | 945   | 996   | 2266  |
| MSTRG. 18734. 1 | noncoding | -0. 0401408 | 2949  | 3057  | 9700  |
| MSTRG. 18734. 2 | noncoding | -0. 192512  | 432   | 450   | 4446  |
| MSTRG. 18741. 3 | coding    | 0. 226      | 150   | 951   | 2597  |
| MSTRG. 18743. 3 | coding    | 0. 096      | 471   | 1011  | 1395  |
| MSTRG. 18744. 1 | coding    | 0. 206      | 45    | 807   | 2550  |
| MSTRG. 18749. 1 | coding    | 0. 132      | 0     | 3810  | 5107  |
| MSTRG. 18749. 2 | coding    | 0. 133      | 0     | 3822  | 6270  |
| MSTRG. 18749. 3 | coding    | 0. 133      | 0     | 3822  | 8219  |
| MSTRG. 18750. 1 | noncoding | -0. 073728  | 72    | 90    | 845   |
| MSTRG. 18751. 2 | coding    | 0. 049      | 201   | 594   | 1318  |
| MSTRG. 18751. 4 | coding    | 0. 049      | 195   | 588   | 805   |
| MSTRG. 18752. 1 | noncoding | -0. 055296  | 2319  | 2520  | 2808  |
| MSTRG. 18752. 2 | noncoding | -0. 1024    | 2319  | 2403  | 2558  |
| MSTRG. 18762. 2 | noncoding | -0. 0180224 | 1461  | 1641  | 3761  |
| MSTRG. 18762. 1 | noncoding | -0. 0180224 | 1461  | 1641  | 3664  |
| MSTRG. 18763. 1 | coding    | 0. 106      | 810   | 4347  | 4697  |
| MSTRG. 18762. 3 | coding    | 0. 01       | 687   | 1071  | 1738  |
| MSTRG. 18764. 1 | noncoding | -0. 045056  | 1365  | 1458  | 4573  |
| MSTRG. 18762. 4 | noncoding | -0. 0004096 | 861   | 936   | 1628  |
| MSTRG. 18763. 2 | coding    | 0. 119      | 1743  | 4332  | 4683  |
| MSTRG. 18763. 4 | coding    | 0. 106      | 171   | 3708  | 4058  |
| MSTRG. 18763. 5 | coding    | 0. 106      | 171   | 3705  | 4055  |
| MSTRG. 18763. 7 | coding    | 0. 105      | 1287  | 4293  | 4644  |
| MSTRG. 18768. 2 | coding    | 0. 117      | 0     | 6201  | 7446  |
| MSTRG. 18756. 1 | coding    | 0. 071      | 0     | 480   | 673   |
| MSTRG. 18761. 1 | coding    | 0. 256      | 600   | 3096  | 5527  |
| MSTRG. 18769. 5 | coding    | 0. 253      | 2550  | 6624  | 10337 |
| MSTRG. 18769. 6 | coding    | 0. 256      | 327   | 4626  | 7945  |
| MSTRG. 18770. 1 | noncoding | -0. 0397312 | 3132  | 3483  | 7025  |
| MSTRG. 18771. 1 | noncoding | -0. 110592  | 1140  | 1185  | 1411  |
| MSTRG. 18772. 1 | noncoding | -0. 1040384 | 0     | 69    | 487   |
| MSTRG. 18773. 1 | noncoding | -0. 004096  | 453   | 777   | 1078  |
| MSTRG. 18776. 1 | noncoding | -0. 1253376 | 0     | 285   | 552   |
| MSTRG. 18805. 1 | coding    | 0. 053      | 15294 | 16533 | 18699 |
| MSTRG. 18805. 2 | noncoding | -0. 0212992 | 7410  | 7572  | 7727  |
| MSTRG. 18816. 4 | noncoding | -0. 094208  | 504   | 549   | 703   |
| MSTRG. 18816. 5 | noncoding | -0. 0180224 | 624   | 783   | 1840  |
| MSTRG. 18818. 2 | coding    | 0. 505      | 0     | 339   | 3219  |
| MSTRG. 18825. 7 | coding    | 0. 102      | 366   | 1674  | 7942  |
| MSTRG. 18829. 1 | noncoding | -0. 032768  | 3186  | 3276  | 8023  |
| MSTRG. 18821. 1 | noncoding | -0. 08192   | 615   | 678   | 1410  |
| MSTRG. 18822. 4 | coding    | 0. 024      | 1110  | 1341  | 1847  |

|               |           |            |       |       |       |
|---------------|-----------|------------|-------|-------|-------|
| MSTRG.18830.2 | noncoding | -0.06144   | 156   | 204   | 2776  |
| MSTRG.18830.3 | noncoding | -0.028672  | 108   | 141   | 298   |
| MSTRG.18838.1 | noncoding | -0.008192  | 0     | 261   | 414   |
| MSTRG.18841.1 | noncoding | -0.0847872 | 603   | 894   | 1212  |
| MSTRG.18850.1 | noncoding | -0.0004096 | 21    | 21    | 505   |
| MSTRG.18852.1 | coding    | 0.225      | 96    | 7134  | 10781 |
| MSTRG.18861.1 | noncoding | -0.045056  | 621   | 672   | 1167  |
| MSTRG.18862.1 | noncoding | -0.0159744 | 216   | 222   | 378   |
| MSTRG.18872.1 | noncoding | -0.0372736 | 0     | 36    | 218   |
| MSTRG.18882.1 | noncoding | -0.0196608 | 18    | 333   | 488   |
| MSTRG.18894.1 | coding    | 0.075      | 99    | 312   | 517   |
| MSTRG.18894.4 | coding    | 0.092      | 234   | 522   | 723   |
| MSTRG.18894.6 | coding    | 0.113      | 198   | 435   | 636   |
| MSTRG.18894.7 | coding    | 0.079      | 48    | 333   | 535   |
| MSTRG.18894.3 | coding    | 0.096      | 21    | 294   | 494   |
| MSTRG.18894.5 | coding    | 0.092      | 111   | 399   | 601   |
| MSTRG.18906.1 | noncoding | -0.0643072 | 4092  | 4218  | 9654  |
| MSTRG.18907.1 | noncoding | -0.0315392 | 2073  | 2208  | 3175  |
| MSTRG.18908.1 | noncoding | -0.106496  | 507   | 555   | 1050  |
| MSTRG.18911.1 | noncoding | -0.098304  | 39    | 99    | 252   |
| MSTRG.18917.2 | coding    | 0.257      | 636   | 2391  | 4023  |
| MSTRG.18917.3 | coding    | 0.257      | 1041  | 2796  | 4239  |
| MSTRG.18958.1 | noncoding | -0.028672  | 183   | 219   | 438   |
| MSTRG.18967.1 | noncoding | -0.0106496 | 81    | 279   | 1308  |
| MSTRG.18967.3 | coding    | 0.084      | 684   | 1269  | 5440  |
| MSTRG.18955.1 | noncoding | -0.135168  | 300   | 330   | 1416  |
| MSTRG.18979.1 | noncoding | -0.0438272 | 318   | 501   | 1019  |
| MSTRG.18983.2 | coding    | 0.035      | 30    | 3210  | 4150  |
| MSTRG.18986.1 | coding    | 0.065      | 606   | 798   | 1651  |
| MSTRG.18987.1 | coding    | 0.068      | 729   | 900   | 2778  |
| MSTRG.18984.2 | coding    | 0.014      | 75    | 243   | 524   |
| MSTRG.18997.1 | noncoding | -0.083968  | 0     | 351   | 896   |
| MSTRG.18997.2 | noncoding | -0.098304  | 0     | 372   | 1586  |
| MSTRG.18999.1 | noncoding | -0.0319488 | 315   | 576   | 733   |
| MSTRG.18999.2 | coding    | 0.168      | 375   | 1035  | 1191  |
| MSTRG.19005.1 | noncoding | -0.0180224 | 3201  | 3249  | 8811  |
| MSTRG.19006.1 | noncoding | -0.0086016 | 4596  | 4743  | 16484 |
| MSTRG.19014.6 | coding    | 0.035      | 0     | 2148  | 3409  |
| MSTRG.19014.5 | coding    | 0.042      | 444   | 2361  | 3624  |
| MSTRG.19015.1 | noncoding | -0.0659456 | 84    | 357   | 510   |
| MSTRG.19015.2 | noncoding | -0.32768   | 393   | 408   | 565   |
| MSTRG.19015.3 | noncoding | -0.032768  | 279   | 363   | 850   |
| MSTRG.19009.1 | noncoding | -0.0004096 | 0     | 0     | 234   |
| MSTRG.19024.1 | noncoding | -0.0004096 | 0     | 0     | 431   |
| MSTRG.19041.1 | noncoding | -0.028672  | 63    | 69    | 222   |
| MSTRG.19049.1 | coding    | 0.123      | 17598 | 17832 | 21591 |
| MSTRG.19049.2 | coding    | 0.077      | 135   | 633   | 17093 |
| MSTRG.19049.3 | noncoding | -0.0004096 | 0     | 0     | 526   |
| MSTRG.19049.4 | noncoding | -0.008192  | 3471  | 3660  | 4763  |
| MSTRG.19052.2 | noncoding | -0.0569344 | 1863  | 2616  | 3097  |
| MSTRG.19034.1 | noncoding | -0.0495616 | 765   | 1077  | 1232  |
| MSTRG.19038.1 | noncoding | -0.086016  | 639   | 672   | 994   |
| MSTRG.19039.3 | noncoding | -0.0724992 | 3723  | 4104  | 4312  |
| MSTRG.19053.2 | coding    | 0.127      | 129   | 1626  | 3056  |



|               |           |            |       |       |       |
|---------------|-----------|------------|-------|-------|-------|
| MSTRG.19053.3 | coding    | 0.119      | 702   | 1977  | 3467  |
| MSTRG.19059.4 | coding    | 0.088      | 336   | 8223  | 8794  |
| MSTRG.19059.3 | coding    | 0.086      | 336   | 8193  | 9864  |
| MSTRG.19061.1 | coding    | 0.368      | 123   | 1032  | 1186  |
| MSTRG.19063.1 | noncoding | -0.0610304 | 312   | 624   | 780   |
| MSTRG.19066.1 | noncoding | -0.024576  | 165   | 237   | 1248  |
| MSTRG.19068.2 | noncoding | -0.077824  | 288   | 300   | 586   |
| MSTRG.19069.1 | coding    | 0.201      | 405   | 1137  | 3423  |
| MSTRG.19069.2 | coding    | 0.201      | 102   | 834   | 3121  |
| MSTRG.19069.4 | coding    | 0.201      | 330   | 1062  | 3299  |
| MSTRG.19069.6 | noncoding | -0.0851968 | 24552 | 25065 | 25219 |
| MSTRG.19072.1 | coding    | 0.19       | 0     | 2199  | 2689  |
| MSTRG.19072.2 | coding    | 0.187      | 477   | 2916  | 3514  |
| MSTRG.19072.3 | coding    | 0.151      | 477   | 3174  | 3772  |
| MSTRG.19072.4 | coding    | 0.203      | 0     | 2019  | 2701  |
| MSTRG.19073.3 | noncoding | -0.098304  | 0     | 141   | 354   |
| MSTRG.19075.1 | coding    | 0.094      | 2778  | 2991  | 5466  |
| MSTRG.19089.2 | coding    | 0.213      | 7701  | 9384  | 10459 |
| MSTRG.19089.3 | coding    | 0.217      | 1212  | 3456  | 3718  |
| MSTRG.19090.2 | noncoding | -0.0126976 | 171   | 333   | 1897  |
| MSTRG.19094.1 | noncoding | -0.0937984 | 4269  | 4725  | 5027  |
| MSTRG.19094.2 | noncoding | -0.100352  | 4230  | 4617  | 4771  |
| MSTRG.19094.3 | noncoding | -0.100352  | 4137  | 4524  | 4679  |
| MSTRG.19094.5 | coding    | 0.054      | 771   | 1221  | 2793  |
| MSTRG.19095.1 | noncoding | -0.0602112 | 888   | 1254  | 1411  |
| MSTRG.19096.1 | coding    | 0.085      | 162   | 12387 | 14239 |
| MSTRG.19099.1 | noncoding | -0.0004096 | 0     | 0     | 901   |
| MSTRG.19100.1 | noncoding | -0.028672  | 195   | 306   | 460   |
| MSTRG.19101.1 | noncoding | -0.049152  | 429   | 510   | 1354  |
| MSTRG.19078.2 | coding    | 0.128      | 0     | 1335  | 2692  |
| MSTRG.19078.3 | coding    | 0.202      | 864   | 1536  | 2892  |
| MSTRG.19079.1 | coding    | 0.083      | 501   | 681   | 1995  |
| MSTRG.19081.1 | coding    | 0.116      | 2304  | 2673  | 3777  |
| MSTRG.19083.1 | noncoding | -0.02048   | 129   | 219   | 565   |
| MSTRG.19084.3 | noncoding | -0.1990656 | 0     | 141   | 1886  |
| MSTRG.19085.1 | noncoding | -0.057344  | 237   | 303   | 2065  |
| MSTRG.19107.3 | coding    | 0.355      | 870   | 3462  | 4155  |
| MSTRG.19110.1 | noncoding | -0.0098304 | 261   | 423   | 895   |
| MSTRG.19113.4 | coding    | 0.298      | 9     | 1062  | 2958  |
| MSTRG.19115.4 | coding    | 0.255      | 1299  | 2592  | 3072  |
| MSTRG.19115.5 | coding    | 0.255      | 141   | 1434  | 1912  |
| MSTRG.19116.2 | noncoding | -0.0454656 | 510   | 720   | 2930  |
| MSTRG.19116.4 | coding    | 0.107      | 636   | 906   | 1086  |
| MSTRG.19117.2 | coding    | 0.299      | 0     | 990   | 1262  |
| MSTRG.19121.1 | noncoding | -0.0057344 | 129   | 276   | 431   |
| MSTRG.19122.1 | noncoding | -0.077824  | 15    | 87    | 294   |
| MSTRG.19126.2 | coding    | 0.212      | 0     | 327   | 2963  |
| MSTRG.19127.1 | noncoding | -0.147456  | 303   | 321   | 493   |
| MSTRG.19129.1 | noncoding | -0.1024    | 0     | 174   | 4500  |
| MSTRG.19129.2 | noncoding | -0.0438272 | 2805  | 3021  | 8897  |
| MSTRG.19129.4 | coding    | 0.096      | 0     | 585   | 2181  |
| MSTRG.19129.5 | noncoding | -0.0929792 | 0     | 165   | 2380  |
| MSTRG.19131.8 | noncoding | -0.0278528 | 807   | 939   | 1094  |
| MSTRG.19131.7 | coding    | 0.122      | 342   | 780   | 4405  |

|                  |           |             |      |       |       |
|------------------|-----------|-------------|------|-------|-------|
| MSTRG. 19131. 4  | coding    | 0. 134      | 342  | 708   | 5493  |
| MSTRG. 19131. 5  | coding    | 0. 107      | 222  | 453   | 5413  |
| MSTRG. 19131. 6  | coding    | 0. 134      | 222  | 588   | 5375  |
| MSTRG. 19133. 3  | noncoding | -0. 0618496 | 1476 | 1689  | 2325  |
| MSTRG. 19133. 4  | noncoding | -0. 0618496 | 1473 | 1686  | 3756  |
| MSTRG. 19134. 3  | noncoding | -0. 0995328 | 0    | 138   | 4262  |
| MSTRG. 19134. 4  | coding    | 0. 113      | 0    | 477   | 3870  |
| MSTRG. 19136. 1  | noncoding | -0. 0004096 | 864  | 900   | 1301  |
| MSTRG. 19138. 1  | coding    | 0. 066      | 8010 | 13101 | 13531 |
| MSTRG. 19142. 5  | coding    | 0. 22       | 558  | 1929  | 3739  |
| MSTRG. 19148. 3  | coding    | 0. 246      | 0    | 153   | 2864  |
| MSTRG. 19148. 4  | coding    | 0. 001      | 642  | 777   | 2094  |
| MSTRG. 19150. 1  | coding    | 0. 202      | 1308 | 2622  | 7942  |
| MSTRG. 19150. 2  | coding    | 0. 202      | 1440 | 2754  | 9381  |
| MSTRG. 19152. 2  | coding    | 0. 322      | 0    | 546   | 1305  |
| MSTRG. 19144. 1  | noncoding | -0. 0032768 | 363  | 525   | 679   |
| MSTRG. 19146. 1  | noncoding | -0. 131072  | 570  | 618   | 774   |
| MSTRG. 19155. 1  | noncoding | -0. 0139264 | 606  | 765   | 1129  |
| MSTRG. 19156. 1  | noncoding | -0. 053248  | 0    | 6     | 203   |
| MSTRG. 19158. 4  | coding    | 0. 438      | 945  | 1668  | 5488  |
| MSTRG. 19175. 1  | noncoding | -0. 360448  | 294  | 309   | 971   |
| MSTRG. 19177. 4  | coding    | 0. 01       | 5481 | 5736  | 6166  |
| MSTRG. 19177. 1  | coding    | 0. 129      | 0    | 612   | 1666  |
| MSTRG. 19177. 3  | coding    | 0. 077      | 150  | 462   | 1476  |
| MSTRG. 19177. 5  | coding    | 0. 129      | 0    | 612   | 1495  |
| MSTRG. 19177. 6  | noncoding | -0. 0274432 | 2346 | 2511  | 3466  |
| MSTRG. 19177. 7  | coding    | 0. 081      | 753  | 1917  | 5191  |
| MSTRG. 19177. 8  | coding    | 0. 092      | 576  | 1800  | 2641  |
| MSTRG. 19177. 9  | coding    | 0. 129      | 0    | 612   | 3086  |
| MSTRG. 19177. 10 | coding    | 0. 068      | 1812 | 2616  | 3869  |
| MSTRG. 19177. 12 | noncoding | -0. 055296  | 234  | 561   | 2136  |
| MSTRG. 19177. 13 | coding    | 0. 077      | 150  | 462   | 1809  |
| MSTRG. 19183. 1  | noncoding | -0. 004096  | 549  | 627   | 1211  |
| MSTRG. 19183. 2  | noncoding | -0. 004096  | 75   | 153   | 748   |
| MSTRG. 19189. 2  | noncoding | -0. 096256  | 0    | 405   | 2016  |
| MSTRG. 19166. 2  | coding    | 0. 024      | 1671 | 1821  | 3489  |
| MSTRG. 19166. 3  | noncoding | -0. 088064  | 2697 | 3162  | 3317  |
| MSTRG. 19168. 1  | noncoding | -0. 02048   | 213  | 348   | 2079  |
| MSTRG. 19169. 4  | coding    | 0. 063      | 1338 | 1932  | 3344  |
| MSTRG. 19171. 7  | coding    | 0. 079      | 1551 | 1734  | 1951  |
| MSTRG. 19171. 2  | coding    | 0. 079      | 1491 | 1674  | 1893  |
| MSTRG. 19171. 3  | coding    | 0. 079      | 1206 | 1389  | 1606  |
| MSTRG. 19171. 4  | coding    | 0. 079      | 1407 | 1590  | 1808  |
| MSTRG. 19171. 5  | coding    | 0. 079      | 1470 | 1653  | 1872  |
| MSTRG. 19171. 6  | coding    | 0. 079      | 1341 | 1524  | 1743  |
| MSTRG. 19194. 2  | coding    | 0. 053      | 255  | 492   | 926   |
| MSTRG. 19196. 1  | noncoding | -0. 0188416 | 405  | 564   | 1021  |
| MSTRG. 19196. 2  | noncoding | -0. 0258048 | 357  | 603   | 1064  |
| MSTRG. 19203. 1  | coding    | 0. 169      | 96   | 1110  | 1541  |
| MSTRG. 19203. 2  | coding    | 0. 175      | 156  | 450   | 648   |
| MSTRG. 19204. 3  | coding    | 0. 25       | 1029 | 1491  | 2761  |
| MSTRG. 19205. 1  | noncoding | -0. 0495616 | 399  | 564   | 1568  |
| MSTRG. 19205. 2  | noncoding | -0. 0495616 | 681  | 846   | 1835  |
| MSTRG. 19205. 3  | noncoding | -0. 004096  | 0    | 72    | 1056  |

|               |           |            |       |       |       |
|---------------|-----------|------------|-------|-------|-------|
| MSTRG.19206.1 | noncoding | -0.0425984 | 39    | 57    | 283   |
| MSTRG.19207.2 | noncoding | -0.004096  | 624   | 849   | 1239  |
| MSTRG.19210.5 | coding    | 0.073      | 864   | 1062  | 2670  |
| MSTRG.19210.6 | coding    | 0.092      | 7260  | 9438  | 10292 |
| MSTRG.19210.4 | coding    | 0.093      | 2808  | 5001  | 5853  |
| MSTRG.19210.7 | coding    | 0.085      | 6939  | 9141  | 9995  |
| MSTRG.19210.3 | coding    | 0.085      | 5697  | 7899  | 8751  |
| MSTRG.19210.8 | noncoding | -0.0671744 | 3786  | 4020  | 4176  |
| MSTRG.19197.1 | noncoding | -0.0049152 | 1509  | 1899  | 2171  |
| MSTRG.19202.1 | noncoding | -0.069632  | 336   | 417   | 696   |
| MSTRG.19213.1 | noncoding | -0.0155648 | 495   | 660   | 2107  |
| MSTRG.19213.2 | noncoding | -0.0335872 | 0     | 129   | 1668  |
| MSTRG.19215.1 | noncoding | -0.028672  | 174   | 459   | 2296  |
| MSTRG.19217.4 | coding    | 0.072      | 681   | 1722  | 3024  |
| MSTRG.19217.2 | coding    | 0.072      | 639   | 1680  | 2980  |
| MSTRG.19217.5 | coding    | 0.072      | 681   | 1716  | 2319  |
| MSTRG.19218.1 | noncoding | -0.02048   | 6     | 129   | 861   |
| MSTRG.19318.1 | noncoding | -0.0270336 | 3438  | 3669  | 5925  |
| MSTRG.19319.3 | coding    | 0.251      | 0     | 1749  | 2767  |
| MSTRG.19323.1 | noncoding | -0.0380928 | 192   | 279   | 1166  |
| MSTRG.19319.4 | noncoding | -0.0638976 | 9177  | 9441  | 9672  |
| MSTRG.19319.5 | noncoding | -0.0086016 | 822   | 963   | 3332  |
| MSTRG.19319.6 | noncoding | -0.0139264 | 5121  | 5289  | 5934  |
| MSTRG.19325.1 | noncoding | -0.049152  | 2796  | 2883  | 4401  |
| MSTRG.19325.2 | noncoding | -0.0032768 | 4410  | 4908  | 8539  |
| MSTRG.19326.1 | noncoding | -0.012288  | 573   | 726   | 8218  |
| MSTRG.19328.1 | noncoding | -0.004096  | 11388 | 11514 | 11791 |
| MSTRG.19338.1 | noncoding | -0.0249856 | 1356  | 1569  | 2537  |
| MSTRG.19339.1 | noncoding | -0.008192  | 6045  | 6183  | 8312  |
| MSTRG.19340.1 | noncoding | -0.02048   | 2235  | 2361  | 6707  |
| MSTRG.19342.1 | noncoding | -0.0352256 | 1542  | 1623  | 3415  |
| MSTRG.19347.2 | noncoding | -0.0270336 | 849   | 1071  | 12469 |
| MSTRG.19339.2 | coding    | 0.068      | 22185 | 22788 | 33253 |
| MSTRG.19339.3 | coding    | 0.087      | 5955  | 6285  | 10211 |
| MSTRG.19339.4 | coding    | 0.061      | 5085  | 5313  | 8541  |
| MSTRG.19339.5 | noncoding | -0.0663552 | 1521  | 1698  | 12283 |
| MSTRG.19339.6 | noncoding | -0.016384  | 2364  | 2490  | 6459  |
| MSTRG.19339.7 | noncoding | -0.016384  | 141   | 267   | 2642  |
| MSTRG.19339.8 | noncoding | -0.0028672 | 1551  | 1770  | 5934  |
| MSTRG.19349.1 | noncoding | -0.0741376 | 1647  | 1665  | 2906  |
| MSTRG.19221.1 | noncoding | -0.024576  | 5211  | 5334  | 9078  |
| MSTRG.19221.2 | noncoding | -0.022528  | 465   | 558   | 2513  |
| MSTRG.19230.1 | noncoding | -0.1056768 | 0     | 132   | 1059  |
| MSTRG.19235.1 | noncoding | -0.0499712 | 129   | 315   | 470   |
| MSTRG.19249.1 | noncoding | -0.002048  | 15    | 159   | 1854  |
| MSTRG.19249.2 | noncoding | -0.024576  | 924   | 1032  | 2062  |
| MSTRG.19249.3 | noncoding | -0.022528  | 354   | 522   | 744   |
| MSTRG.19249.4 | noncoding | -0.0356352 | 1299  | 1476  | 2565  |
| MSTRG.19237.1 | coding    | 0.057      | 636   | 978   | 3282  |
| MSTRG.19252.4 | noncoding | -0.0577536 | 186   | 645   | 1789  |
| MSTRG.19253.1 | noncoding | -0.1273856 | 336   | 678   | 1201  |
| MSTRG.19253.4 | coding    | 0.319      | 69    | 408   | 919   |
| MSTRG.19253.5 | noncoding | -0.0520192 | 207   | 384   | 895   |
| MSTRG.19254.1 | coding    | 0.117      | 2055  | 2310  | 5126  |

|                  |           |             |       |       |       |
|------------------|-----------|-------------|-------|-------|-------|
| MSTRG. 19258. 1  | noncoding | -0. 0868352 | 0     | 75    | 3515  |
| MSTRG. 19258. 2  | noncoding | -0. 004096  | 126   | 240   | 2337  |
| MSTRG. 19264. 1  | noncoding | -0. 0516096 | 6912  | 7377  | 7782  |
| MSTRG. 19265. 1  | noncoding | -0. 0626688 | 792   | 1296  | 1451  |
| MSTRG. 19266. 2  | noncoding | -0. 02048   | 3339  | 3462  | 3618  |
| MSTRG. 19270. 2  | coding    | 0. 295      | 213   | 1602  | 2275  |
| MSTRG. 19278. 1  | noncoding | -0. 0380928 | 393   | 510   | 667   |
| MSTRG. 19281. 2  | coding    | 0. 189      | 723   | 1320  | 2741  |
| MSTRG. 19285. 2  | coding    | 0. 312      | 0     | 231   | 6074  |
| MSTRG. 19285. 3  | noncoding | -0. 036864  | 471   | 564   | 6865  |
| MSTRG. 19285. 4  | coding    | 0. 312      | 0     | 231   | 6468  |
| MSTRG. 19291. 1  | noncoding | -0. 045056  | 3429  | 3513  | 4140  |
| MSTRG. 19291. 2  | noncoding | -0. 036864  | 279   | 333   | 1617  |
| MSTRG. 19283. 1  | coding    | 0. 149      | 345   | 1242  | 3141  |
| MSTRG. 19283. 3  | coding    | 0. 149      | 378   | 1275  | 6305  |
| MSTRG. 19305. 4  | noncoding | -0. 0913408 | 0     | 159   | 2958  |
| MSTRG. 19311. 1  | coding    | 0. 003      | 1326  | 1944  | 3394  |
| MSTRG. 19311. 2  | coding    | 0. 104      | 0     | 1695  | 13532 |
| MSTRG. 19311. 4  | noncoding | -0. 0057344 | 189   | 291   | 538   |
| MSTRG. 19311. 5  | coding    | 0. 034      | 3921  | 6684  | 9169  |
| MSTRG. 19311. 6  | coding    | 0. 012      | 60    | 2955  | 5506  |
| MSTRG. 19312. 1  | noncoding | -0. 026624  | 447   | 657   | 811   |
| MSTRG. 19314. 1  | noncoding | -0. 053248  | 60    | 423   | 3001  |
| MSTRG. 19314. 3  | coding    | 0. 101      | 84    | 864   | 3793  |
| MSTRG. 19314. 4  | coding    | 0. 185      | 0     | 504   | 3058  |
| MSTRG. 19316. 1  | coding    | 0. 091      | 2376  | 3003  | 3376  |
| MSTRG. 19314. 6  | coding    | 0. 033      | 2490  | 2775  | 3486  |
| MSTRG. 19316. 2  | coding    | 0. 091      | 2376  | 3003  | 5284  |
| MSTRG. 19316. 3  | coding    | 0. 091      | 2376  | 3003  | 3645  |
| MSTRG. 19316. 4  | coding    | 0. 091      | 2391  | 3018  | 3594  |
| MSTRG. 19317. 1  | noncoding | -0. 0016384 | 1626  | 1731  | 1907  |
| MSTRG. 19313. 1  | coding    | 0. 079      | 3444  | 3852  | 4792  |
| MSTRG. 19352. 1  | coding    | 0. 359      | 0     | 1353  | 5773  |
| MSTRG. 19352. 3  | coding    | 0. 357      | 0     | 1287  | 4163  |
| MSTRG. 19352. 4  | coding    | 0. 232      | 1200  | 2028  | 2855  |
| MSTRG. 19352. 5  | coding    | 0. 236      | 1782  | 2562  | 3389  |
| MSTRG. 19352. 12 | coding    | 0. 227      | 666   | 1098  | 1374  |
| MSTRG. 19352. 10 | coding    | 0. 237      | 6165  | 6507  | 6783  |
| MSTRG. 19352. 13 | coding    | 0. 223      | 21    | 831   | 1108  |
| MSTRG. 19352. 9  | coding    | 0. 218      | 21    | 891   | 1168  |
| MSTRG. 19352. 8  | coding    | 0. 233      | 1782  | 2604  | 2879  |
| MSTRG. 19352. 11 | coding    | 0. 252      | 2076  | 2820  | 3097  |
| MSTRG. 19352. 6  | coding    | 0. 35       | 0     | 1386  | 1661  |
| MSTRG. 19354. 1  | noncoding | -0. 0077824 | 1182  | 1302  | 3926  |
| MSTRG. 19359. 2  | coding    | 0. 246      | 0     | 141   | 1426  |
| MSTRG. 19359. 3  | noncoding | -0. 02048   | 1392  | 1434  | 4112  |
| MSTRG. 19359. 4  | coding    | 0. 211      | 0     | 138   | 2305  |
| MSTRG. 19359. 5  | coding    | 0. 259      | 0     | 123   | 1150  |
| MSTRG. 19361. 1  | noncoding | -0. 0483328 | 5811  | 6021  | 6176  |
| MSTRG. 19361. 2  | noncoding | -0. 0483328 | 4320  | 4530  | 4686  |
| MSTRG. 19361. 3  | noncoding | -0. 055296  | 1668  | 1872  | 2027  |
| MSTRG. 19361. 4  | noncoding | -0. 0483328 | 4086  | 4296  | 4453  |
| MSTRG. 19361. 5  | noncoding | -0. 0483328 | 7572  | 7782  | 7937  |
| MSTRG. 19361. 6  | noncoding | -0. 0483328 | 11769 | 11979 | 12135 |

|                  |           |             |       |       |       |
|------------------|-----------|-------------|-------|-------|-------|
| MSTRG. 19361. 10 | coding    | 0. 03       | 1128  | 1269  | 1662  |
| MSTRG. 19361. 7  | noncoding | -0. 0483328 | 3204  | 3414  | 3570  |
| MSTRG. 19361. 8  | noncoding | -0. 0483328 | 2376  | 2586  | 2742  |
| MSTRG. 19361. 9  | noncoding | -0. 0483328 | 3486  | 3696  | 3852  |
| MSTRG. 19361. 11 | noncoding | -0. 0483328 | 4278  | 4488  | 4644  |
| MSTRG. 19361. 12 | noncoding | -0. 0483328 | 13494 | 13704 | 13860 |
| MSTRG. 19361. 13 | noncoding | -0. 0483328 | 8004  | 8214  | 8371  |
| MSTRG. 19361. 14 | noncoding | -0. 0126976 | 2385  | 2514  | 7824  |
| MSTRG. 19363. 1  | noncoding | -0. 016384  | 159   | 450   | 632   |
| MSTRG. 19401. 1  | noncoding | -0. 0126976 | 2736  | 2805  | 3876  |
| MSTRG. 19402. 1  | noncoding | -0. 0004096 | 0     | 0     | 426   |
| MSTRG. 19368. 1  | noncoding | -0. 0004096 | 0     | 0     | 223   |
| MSTRG. 19369. 1  | noncoding | -0. 0053248 | 315   | 573   | 728   |
| MSTRG. 19370. 1  | noncoding | -0. 0004096 | 0     | 0     | 358   |
| MSTRG. 19407. 1  | noncoding | -0. 151552  | 648   | 675   | 917   |
| MSTRG. 19408. 1  | noncoding | -0. 1241088 | 1272  | 1794  | 1973  |
| MSTRG. 19414. 1  | coding    | 0. 112      | 558   | 2031  | 2709  |
| MSTRG. 19414. 2  | coding    | 0. 096      | 9     | 1956  | 2798  |
| MSTRG. 19415. 1  | coding    | 0. 105      | 837   | 2130  | 2868  |
| MSTRG. 19415. 3  | coding    | 0. 133      | 0     | 1620  | 1789  |
| MSTRG. 19415. 4  | coding    | 0. 103      | 174   | 1464  | 1632  |
| MSTRG. 19416. 1  | noncoding | -0. 0577536 | 3     | 309   | 2739  |
| MSTRG. 19416. 2  | coding    | 0. 025      | 630   | 996   | 1834  |
| MSTRG. 19413. 1  | noncoding | -0. 0278528 | 957   | 1299  | 1454  |
| MSTRG. 19420. 2  | coding    | 0. 189      | 0     | 1560  | 9443  |
| MSTRG. 19422. 1  | coding    | 0. 384      | 705   | 1449  | 1604  |
| MSTRG. 19422. 3  | coding    | 0. 44       | 705   | 2124  | 4664  |
| MSTRG. 19422. 2  | coding    | 0. 466      | 783   | 1926  | 2809  |
| MSTRG. 19422. 4  | coding    | 0. 459      | 804   | 2001  | 2511  |
| MSTRG. 19422. 5  | coding    | 0. 461      | 783   | 1926  | 2427  |
| MSTRG. 19423. 1  | noncoding | -0. 0131072 | 1218  | 1374  | 3239  |
| MSTRG. 19425. 1  | coding    | 0. 471      | 84    | 2805  | 4809  |
| MSTRG. 19425. 4  | coding    | 0. 459      | 432   | 3228  | 8463  |
| MSTRG. 19428. 1  | coding    | 0. 16       | 60    | 2310  | 2984  |
| MSTRG. 19432. 1  | coding    | 0. 463      | 0     | 144   | 1062  |
| MSTRG. 19434. 1  | coding    | 0. 034      | 99    | 2631  | 3328  |
| MSTRG. 19435. 1  | noncoding | -0. 151552  | 273   | 309   | 1634  |
| MSTRG. 19436. 1  | noncoding | -0. 0323584 | 975   | 1155  | 1445  |
| MSTRG. 19440. 2  | noncoding | -0. 0139264 | 1902  | 2043  | 2207  |
| MSTRG. 19440. 1  | noncoding | -0. 0004096 | 315   | 426   | 592   |
| MSTRG. 19441. 1  | noncoding | -0. 059392  | 255   | 870   | 1025  |
| MSTRG. 19446. 2  | coding    | 0. 065      | 1377  | 2037  | 6547  |
| MSTRG. 19464. 1  | coding    | 0. 036      | 6663  | 9420  | 11294 |
| MSTRG. 19464. 6  | noncoding | -0. 073728  | 30    | 78    | 812   |
| MSTRG. 19478. 2  | coding    | 0. 116      | 0     | 1113  | 3199  |
| MSTRG. 19479. 1  | noncoding | -0. 004096  | 837   | 972   | 1248  |
| MSTRG. 19448. 1  | noncoding | -0. 053248  | 39    | 96    | 1542  |
| MSTRG. 19458. 2  | coding    | 0. 429      | 0     | 66    | 2722  |
| MSTRG. 19458. 4  | noncoding | -0. 0671744 | 0     | 42    | 2707  |
| MSTRG. 19458. 3  | noncoding | -0. 004096  | 195   | 294   | 621   |
| MSTRG. 19458. 5  | coding    | 0. 198      | 1731  | 4275  | 10278 |
| MSTRG. 19459. 1  | noncoding | -0. 0405504 | 1965  | 2133  | 3968  |
| MSTRG. 19481. 1  | noncoding | -0. 065536  | 5655  | 5733  | 9242  |
| MSTRG. 19480. 2  | coding    | 0. 263      | 6411  | 6921  | 9592  |

|                 |           |             |       |       |       |
|-----------------|-----------|-------------|-------|-------|-------|
| MSTRG. 19485. 1 | coding    | 0. 076      | 342   | 639   | 6734  |
| MSTRG. 19485. 2 | noncoding | -0. 0749568 | 174   | 852   | 6949  |
| MSTRG. 19485. 3 | noncoding | -0. 0946176 | 0     | 483   | 872   |
| MSTRG. 19486. 1 | noncoding | -0. 0241664 | 1431  | 1533  | 6701  |
| MSTRG. 19490. 5 | coding    | 0. 118      | 0     | 3831  | 6139  |
| MSTRG. 19490. 8 | coding    | 0. 135      | 456   | 1557  | 1810  |
| MSTRG. 19491. 1 | noncoding | -0. 0438272 | 675   | 825   | 2296  |
| MSTRG. 19492. 1 | coding    | 0. 073      | 567   | 810   | 10202 |
| MSTRG. 19493. 1 | noncoding | -0. 0335872 | 264   | 300   | 2311  |
| MSTRG. 19494. 1 | noncoding | -0. 053248  | 255   | 327   | 1757  |
| MSTRG. 19495. 1 | noncoding | -0. 045056  | 3333  | 3438  | 6926  |
| MSTRG. 19496. 1 | noncoding | -0. 069632  | 1284  | 1368  | 3187  |
| MSTRG. 19505. 2 | coding    | 0. 023      | 1392  | 1890  | 2367  |
| MSTRG. 19505. 3 | coding    | 0. 023      | 336   | 834   | 1313  |
| MSTRG. 19505. 4 | coding    | 0. 023      | 1620  | 2118  | 2596  |
| MSTRG. 19506. 1 | noncoding | -0. 0561152 | 387   | 474   | 1966  |
| MSTRG. 19507. 4 | coding    | 0. 151      | 588   | 999   | 1289  |
| MSTRG. 19508. 3 | coding    | 0. 461      | 0     | 189   | 802   |
| MSTRG. 19509. 2 | coding    | 0. 212      | 0     | 1869  | 2204  |
| MSTRG. 19515. 3 | coding    | 0. 098      | 258   | 546   | 936   |
| MSTRG. 19515. 2 | noncoding | -0. 053248  | 9     | 198   | 3863  |
| MSTRG. 19515. 4 | coding    | 0. 09       | 78    | 351   | 740   |
| MSTRG. 19521. 1 | coding    | 0. 05       | 183   | 1110  | 1397  |
| MSTRG. 19521. 2 | coding    | 0. 006      | 291   | 897   | 1891  |
| MSTRG. 19522. 4 | coding    | 0. 098      | 330   | 990   | 3303  |
| MSTRG. 19526. 1 | noncoding | -0. 0212992 | 186   | 201   | 355   |
| MSTRG. 19530. 1 | noncoding | -0. 004096  | 150   | 294   | 5417  |
| MSTRG. 19531. 1 | coding    | 0. 109      | 2394  | 2604  | 4855  |
| MSTRG. 19526. 2 | noncoding | -0. 0372736 | 792   | 1155  | 7882  |
| MSTRG. 19532. 1 | noncoding | -0. 0339968 | 180   | 417   | 749   |
| MSTRG. 19516. 1 | noncoding | -0. 0098304 | 909   | 1080  | 2109  |
| MSTRG. 19533. 5 | noncoding | -0. 043008  | 5613  | 5811  | 9803  |
| MSTRG. 19533. 6 | noncoding | -0. 008192  | 0     | 135   | 427   |
| MSTRG. 19534. 1 | noncoding | -0. 032768  | 2259  | 2304  | 3594  |
| MSTRG. 19533. 7 | coding    | 0. 513      | 21    | 3270  | 5894  |
| MSTRG. 19535. 1 | noncoding | -0. 0172032 | 1044  | 1191  | 1688  |
| MSTRG. 19538. 1 | noncoding | -0. 0049152 | 126   | 267   | 2946  |
| MSTRG. 19540. 1 | noncoding | -0. 0196608 | 2775  | 3177  | 5225  |
| MSTRG. 19543. 4 | coding    | 0. 231      | 411   | 2874  | 3448  |
| MSTRG. 19543. 5 | coding    | 0. 246      | 0     | 2304  | 2879  |
| MSTRG. 19543. 6 | coding    | 0. 22       | 0     | 2730  | 3305  |
| MSTRG. 19544. 1 | noncoding | -0. 0712704 | 207   | 249   | 1140  |
| MSTRG. 19547. 1 | noncoding | -0. 0323584 | 630   | 795   | 6569  |
| MSTRG. 19551. 2 | coding    | 0. 131      | 180   | 768   | 1092  |
| MSTRG. 19555. 1 | coding    | 0. 145      | 360   | 1776  | 1961  |
| MSTRG. 19559. 7 | coding    | 0. 321      | 96    | 1149  | 3728  |
| MSTRG. 19559. 8 | coding    | 0. 327      | 96    | 1197  | 3776  |
| MSTRG. 19559. 5 | coding    | 0. 326      | 540   | 1674  | 4252  |
| MSTRG. 19559. 6 | coding    | 0. 321      | 540   | 1560  | 4138  |
| MSTRG. 19560. 1 | noncoding | -0. 0630784 | 14493 | 14691 | 40849 |
| MSTRG. 19561. 1 | noncoding | -0. 012288  | 7299  | 7413  | 18371 |
| MSTRG. 19562. 2 | noncoding | -0. 0262144 | 2556  | 2757  | 39462 |
| MSTRG. 19562. 1 | noncoding | -0. 036864  | 2460  | 2559  | 2896  |
| MSTRG. 19562. 4 | noncoding | -0. 0262144 | 16011 | 16212 | 52749 |

|                  |           |             |       |       |       |
|------------------|-----------|-------------|-------|-------|-------|
| MSTRG. 19562. 5  | noncoding | -0. 0262144 | 15642 | 15843 | 41335 |
| MSTRG. 19562. 3  | noncoding | -0. 0262144 | 17601 | 17802 | 43292 |
| MSTRG. 19562. 6  | noncoding | -0. 0262144 | 17601 | 17802 | 54484 |
| MSTRG. 19559. 9  | noncoding | -0. 1560576 | 0     | 102   | 9553  |
| MSTRG. 19563. 1  | noncoding | -0. 0520192 | 0     | 303   | 2389  |
| MSTRG. 19568. 1  | noncoding | -0. 2772992 | 1407  | 2430  | 2587  |
| MSTRG. 19568. 2  | coding    | 0. 507      | 303   | 909   | 1063  |
| MSTRG. 19568. 3  | coding    | 0. 495      | 36    | 753   | 907   |
| MSTRG. 19568. 4  | coding    | 0. 446      | 480   | 1011  | 1168  |
| MSTRG. 19572. 9  | coding    | 0. 32       | 258   | 3693  | 4060  |
| MSTRG. 19572. 8  | coding    | 0. 318      | 228   | 4023  | 4392  |
| MSTRG. 19572. 5  | coding    | 0. 331      | 834   | 4566  | 4933  |
| MSTRG. 19572. 7  | coding    | 0. 328      | 198   | 3948  | 4315  |
| MSTRG. 19572. 6  | coding    | 0. 353      | 0     | 3726  | 7472  |
| MSTRG. 19573. 1  | noncoding | -0. 0753664 | 642   | 744   | 3371  |
| MSTRG. 19572. 10 | noncoding | -0. 032768  | 1836  | 1914  | 5410  |
| MSTRG. 19572. 11 | coding    | 0. 57       | 0     | 207   | 8062  |
| MSTRG. 19574. 1  | noncoding | -0. 049152  | 1011  | 1092  | 3027  |
| MSTRG. 19572. 12 | noncoding | -0. 2121728 | 0     | 156   | 9794  |
| MSTRG. 19570. 2  | coding    | 0. 216      | 0     | 669   | 2302  |
| MSTRG. 19570. 3  | coding    | 0. 196      | 882   | 1599  | 9703  |
| MSTRG. 19570. 4  | coding    | 0. 189      | 780   | 1473  | 4603  |
| MSTRG. 19571. 2  | coding    | 0. 468      | 0     | 2658  | 3825  |
| MSTRG. 19577. 2  | coding    | 0. 241      | 33    | 522   | 1384  |
| MSTRG. 19579. 1  | coding    | 0. 443      | 441   | 2142  | 4562  |
| MSTRG. 19579. 2  | coding    | 0. 413      | 456   | 1950  | 2383  |
| MSTRG. 19582. 2  | coding    | 0. 421      | 1422  | 6033  | 8196  |
| MSTRG. 19582. 4  | coding    | 0. 419      | 1419  | 6168  | 7523  |
| MSTRG. 19582. 5  | coding    | 0. 419      | 1419  | 6078  | 7433  |
| MSTRG. 19582. 6  | coding    | 0. 441      | 18    | 4251  | 5604  |
| MSTRG. 19582. 3  | coding    | 0. 419      | 1419  | 6159  | 8324  |
| MSTRG. 19582. 7  | coding    | 0. 421      | 1419  | 6021  | 8186  |
| MSTRG. 19581. 1  | noncoding | -0. 01024   | 585   | 747   | 1221  |
| MSTRG. 19583. 1  | coding    | 0. 199      | 24    | 2058  | 3004  |
| MSTRG. 19590. 1  | coding    | 0. 235      | 108   | 711   | 1427  |
| MSTRG. 19590. 2  | noncoding | -0. 028672  | 333   | 468   | 1007  |
| MSTRG. 19591. 1  | noncoding | -0. 0282624 | 30    | 276   | 745   |
| MSTRG. 19591. 2  | noncoding | -0. 0282624 | 27    | 273   | 916   |
| MSTRG. 19593. 1  | coding    | 0. 187      | 147   | 687   | 1221  |
| MSTRG. 19596. 4  | coding    | 0. 252      | 171   | 3174  | 3533  |
| MSTRG. 19598. 3  | coding    | 0. 187      | 0     | 11928 | 16544 |
| MSTRG. 19598. 5  | coding    | 0. 188      | 0     | 11772 | 14445 |
| MSTRG. 19598. 6  | coding    | 0. 207      | 3396  | 10893 | 15510 |
| MSTRG. 19600. 1  | coding    | 0. 285      | 0     | 1038  | 2682  |
| MSTRG. 19602. 1  | coding    | 0. 473      | 0     | 4191  | 5496  |
| MSTRG. 19603. 1  | noncoding | -0. 06144   | 45    | 360   | 800   |
| MSTRG. 19602. 3  | coding    | 0. 484      | 0     | 3861  | 5144  |
| MSTRG. 19602. 4  | coding    | 0. 453      | 162   | 4161  | 5466  |
| MSTRG. 19602. 5  | coding    | 0. 541      | 4476  | 6174  | 7475  |
| MSTRG. 19602. 6  | coding    | 0. 498      | 81    | 1611  | 2915  |
| MSTRG. 19604. 6  | coding    | 0. 113      | 339   | 1680  | 6140  |
| MSTRG. 19604. 4  | coding    | 0. 113      | 333   | 1674  | 6110  |
| MSTRG. 19604. 8  | coding    | 0. 114      | 1194  | 2550  | 5765  |
| MSTRG. 19622. 1  | noncoding | -0. 0208896 | 783   | 939   | 2606  |

|               |           |            |      |      |       |
|---------------|-----------|------------|------|------|-------|
| MSTRG.19624.7 | coding    | 0.522      | 582  | 3492 | 4878  |
| MSTRG.19624.9 | coding    | 0.521      | 582  | 3495 | 4881  |
| MSTRG.19616.2 | coding    | 0.16       | 24   | 2340 | 10178 |
| MSTRG.19614.1 | coding    | 0.45       | 0    | 1851 | 2890  |
| MSTRG.19614.2 | coding    | 0.455      | 0    | 1671 | 2681  |
| MSTRG.19629.1 | coding    | 0.385      | 273  | 2052 | 3810  |
| MSTRG.19628.1 | noncoding | -0.0188416 | 24   | 411  | 701   |
| MSTRG.19628.2 | noncoding | -0.0217088 | 33   | 318  | 951   |
| MSTRG.19638.4 | coding    | 0.158      | 0    | 5523 | 6246  |
| MSTRG.19638.2 | coding    | 0.158      | 0    | 5580 | 7402  |
| MSTRG.19638.1 | coding    | 0.158      | 0    | 5523 | 9495  |
| MSTRG.19639.1 | noncoding | -0.028672  | 690  | 705  | 3071  |
| MSTRG.19640.1 | noncoding | -0.016384  | 69   | 174  | 2527  |
| MSTRG.19642.5 | coding    | 0.1        | 267  | 1050 | 4865  |
| MSTRG.19642.6 | coding    | 0.126      | 546  | 1167 | 4982  |
| MSTRG.19642.7 | coding    | 0.126      | 552  | 1173 | 4986  |
| MSTRG.19643.1 | coding    | 0.461      | 1026 | 5514 | 6308  |
| MSTRG.19648.1 | coding    | 0.323      | 150  | 1830 | 6372  |
| MSTRG.19649.3 | coding    | 0.11       | 498  | 1911 | 2348  |
| MSTRG.19650.1 | noncoding | -0.0200704 | 0    | 69   | 233   |
| MSTRG.19671.9 | coding    | 0.473      | 0    | 1950 | 2133  |
| MSTRG.19666.1 | coding    | 0.251      | 471  | 2139 | 3900  |
| MSTRG.19672.2 | noncoding | -0.053248  | 807  | 1101 | 1267  |
| MSTRG.19672.3 | noncoding | -0.0536576 | 402  | 708  | 873   |
| MSTRG.19672.4 | noncoding | -0.0536576 | 393  | 699  | 864   |
| MSTRG.19674.1 | coding    | 0.519      | 120  | 1263 | 1418  |
| MSTRG.19675.1 | coding    | 0.118      | 282  | 1401 | 1841  |
| MSTRG.19676.2 | coding    | 0.088      | 843  | 1083 | 3252  |
| MSTRG.19678.5 | coding    | 0.392      | 126  | 4092 | 5508  |
| MSTRG.19678.8 | coding    | 0.466      | 171  | 1347 | 2728  |
| MSTRG.19681.1 | noncoding | -0.02048   | 1035 | 1053 | 5029  |
| MSTRG.19682.1 | noncoding | -0.0118784 | 669  | 855  | 1009  |
| MSTRG.19683.1 | coding    | 0.1        | 663  | 1197 | 1365  |
| MSTRG.19684.1 | coding    | 0.182      | 126  | 2412 | 2811  |
| MSTRG.19684.2 | coding    | 0.182      | 153  | 2439 | 2839  |
| MSTRG.19701.1 | noncoding | -0.077824  | 519  | 585  | 740   |
| MSTRG.19707.2 | coding    | 0.15       | 1092 | 2235 | 3704  |
| MSTRG.19708.1 | noncoding | -0.0004096 | 279  | 372  | 902   |
| MSTRG.19707.3 | noncoding | -0.016384  | 2703 | 2802 | 3552  |
| MSTRG.19713.2 | coding    | 0.069      | 480  | 888  | 1331  |
| MSTRG.19718.1 | noncoding | -0.221184  | 846  | 879  | 1945  |
| MSTRG.19720.3 | coding    | 0.359      | 0    | 405  | 6402  |
| MSTRG.19721.1 | noncoding | -0.012288  | 2841 | 2964 | 3667  |
| MSTRG.19720.4 | noncoding | -0.116736  | 1149 | 1743 | 9077  |
| MSTRG.19720.5 | noncoding | -0.098304  | 5271 | 5334 | 6695  |
| MSTRG.19722.1 | coding    | 0.365      | 0    | 2418 | 3682  |
| MSTRG.19723.1 | coding    | 0.124      | 102  | 1377 | 6516  |
| MSTRG.19723.4 | noncoding | -0.0479232 | 3543 | 3822 | 4375  |
| MSTRG.19723.3 | coding    | 0.091      | 216  | 1035 | 2909  |
| MSTRG.19723.5 | coding    | 0.124      | 102  | 1377 | 2326  |
| MSTRG.19723.6 | coding    | 0.124      | 102  | 1377 | 1893  |
| MSTRG.19733.1 | coding    | 0.199      | 69   | 2583 | 3484  |
| MSTRG.19743.1 | noncoding | -0.04096   | 144  | 231  | 528   |
| MSTRG.19744.2 | noncoding | -0.200704  | 0    | 45   | 1532  |



|                  |           |             |      |      |       |
|------------------|-----------|-------------|------|------|-------|
| MSTRG. 19744. 4  | noncoding | -0. 057344  | 0    | 111  | 796   |
| MSTRG. 19744. 5  | noncoding | -0. 131072  | 0    | 57   | 2721  |
| MSTRG. 19744. 6  | noncoding | -0. 073728  | 0    | 102  | 1708  |
| MSTRG. 19744. 7  | noncoding | -0. 098304  | 0    | 81   | 237   |
| MSTRG. 19744. 8  | noncoding | -0. 008192  | 0    | 132  | 893   |
| MSTRG. 19744. 9  | noncoding | -0. 098304  | 0    | 90   | 701   |
| MSTRG. 19744. 10 | noncoding | -0. 0086016 | 0    | 219  | 620   |
| MSTRG. 19744. 11 | noncoding | -0. 106496  | 0    | 78   | 300   |
| MSTRG. 19744. 12 | noncoding | -0. 024576  | 0    | 120  | 275   |
| MSTRG. 19744. 13 | noncoding | -0. 106496  | 0    | 78   | 368   |
| MSTRG. 19744. 14 | noncoding | -0. 106496  | 0    | 87   | 476   |
| MSTRG. 19744. 15 | noncoding | -0. 0004096 | 0    | 288  | 1142  |
| MSTRG. 19744. 16 | noncoding | -0. 131072  | 0    | 57   | 213   |
| MSTRG. 19744. 17 | noncoding | -0. 126976  | 0    | 66   | 223   |
| MSTRG. 19744. 18 | noncoding | -0. 131072  | 0    | 57   | 213   |
| MSTRG. 19744. 19 | noncoding | -0. 131072  | 0    | 54   | 211   |
| MSTRG. 19744. 20 | noncoding | -0. 0212992 | 0    | 150  | 304   |
| MSTRG. 19744. 21 | noncoding | -0. 131072  | 0    | 60   | 217   |
| MSTRG. 19744. 22 | noncoding | -0. 126976  | 0    | 63   | 219   |
| MSTRG. 19744. 23 | noncoding | -0. 098304  | 0    | 81   | 237   |
| MSTRG. 19744. 24 | noncoding | -0. 126976  | 0    | 66   | 223   |
| MSTRG. 19744. 25 | noncoding | -0. 126976  | 0    | 66   | 222   |
| MSTRG. 19744. 26 | noncoding | -0. 200704  | 0    | 45   | 227   |
| MSTRG. 19744. 27 | noncoding | -0. 073728  | 0    | 102  | 258   |
| MSTRG. 19744. 28 | noncoding | -0. 131072  | 0    | 57   | 301   |
| MSTRG. 19744. 29 | noncoding | -0. 131072  | 0    | 54   | 210   |
| MSTRG. 19744. 30 | noncoding | -0. 1024    | 0    | 75   | 328   |
| MSTRG. 19744. 31 | noncoding | -0. 167936  | 0    | 48   | 205   |
| MSTRG. 19744. 32 | noncoding | -0. 200704  | 0    | 45   | 201   |
| MSTRG. 19739. 1  | noncoding | -0. 108544  | 0    | 120  | 537   |
| MSTRG. 19751. 1  | noncoding | -0. 0360448 | 7149 | 7854 | 8008  |
| MSTRG. 19752. 1  | noncoding | -0. 008192  | 6    | 108  | 3109  |
| MSTRG. 19752. 2  | noncoding | -0. 09216   | 420  | 495  | 1371  |
| MSTRG. 19751. 2  | noncoding | -0. 0897024 | 1611 | 1872 | 2028  |
| MSTRG. 19751. 3  | noncoding | -0. 0897024 | 318  | 579  | 772   |
| MSTRG. 19755. 1  | coding    | 0. 103      | 501  | 4302 | 5202  |
| MSTRG. 19755. 2  | coding    | 0. 107      | 330  | 2997 | 3897  |
| MSTRG. 19755. 3  | coding    | 0. 109      | 462  | 3438 | 4338  |
| MSTRG. 19755. 4  | coding    | 0. 11       | 0    | 2796 | 3697  |
| MSTRG. 19755. 5  | coding    | 0. 105      | 231  | 2784 | 3685  |
| MSTRG. 19761. 1  | noncoding | -0. 047104  | 717  | 798  | 2765  |
| MSTRG. 19765. 1  | noncoding | -0. 04096   | 405  | 492  | 757   |
| MSTRG. 19766. 1  | noncoding | -0. 0159744 | 2304 | 2403 | 2624  |
| MSTRG. 19767. 3  | coding    | 0. 048      | 534  | 690  | 1701  |
| MSTRG. 19768. 1  | noncoding | -0. 0425984 | 1158 | 1305 | 3589  |
| MSTRG. 19757. 2  | noncoding | -0. 18432   | 165  | 753  | 1835  |
| MSTRG. 19774. 1  | coding    | 0. 12       | 0    | 2853 | 3785  |
| MSTRG. 19779. 2  | coding    | 0. 363      | 0    | 354  | 3988  |
| MSTRG. 19784. 2  | coding    | 0. 22       | 81   | 1383 | 1830  |
| MSTRG. 19785. 3  | coding    | 0. 138      | 306  | 498  | 818   |
| MSTRG. 19788. 1  | noncoding | -0. 045056  | 5913 | 6012 | 10372 |
| MSTRG. 19791. 1  | noncoding | -0. 03072   | 216  | 873  | 1315  |
| MSTRG. 19803. 2  | coding    | 0. 287      | 105  | 2685 | 7967  |
| MSTRG. 19803. 6  | coding    | 0. 298      | 201  | 2427 | 3049  |

|                  |           |             |       |       |       |
|------------------|-----------|-------------|-------|-------|-------|
| MSTRG. 19803. 7  | coding    | 0. 291      | 207   | 2496  | 3117  |
| MSTRG. 19803. 5  | coding    | 0. 291      | 9     | 2682  | 3303  |
| MSTRG. 19804. 1  | noncoding | -0. 0069632 | 576   | 735   | 890   |
| MSTRG. 19805. 1  | coding    | 0. 255      | 282   | 681   | 4168  |
| MSTRG. 19806. 1  | noncoding | -0. 032768  | 381   | 465   | 996   |
| MSTRG. 19807. 3  | coding    | 0. 192      | 390   | 1542  | 1698  |
| MSTRG. 19809. 1  | noncoding | -0. 036864  | 84    | 99    | 268   |
| MSTRG. 19811. 1  | noncoding | -0. 0929792 | 0     | 426   | 1381  |
| MSTRG. 19821. 1  | coding    | 0. 219      | 1710  | 2448  | 2602  |
| MSTRG. 19822. 1  | noncoding | -0. 04096   | 234   | 303   | 499   |
| MSTRG. 19821. 2  | noncoding | -0. 04096   | 0     | 120   | 1386  |
| MSTRG. 19821. 3  | noncoding | -0. 0466944 | 2934  | 3174  | 4928  |
| MSTRG. 19821. 4  | noncoding | -0. 004096  | 129   | 270   | 2299  |
| MSTRG. 19821. 5  | noncoding | -0. 0684032 | 13245 | 13599 | 19256 |
| MSTRG. 19821. 7  | noncoding | -0. 0638976 | 12507 | 12861 | 15392 |
| MSTRG. 19821. 6  | noncoding | -0. 0671744 | 4542  | 4896  | 7427  |
| MSTRG. 19821. 8  | noncoding | -0. 0004096 | 1230  | 1371  | 2146  |
| MSTRG. 19821. 9  | noncoding | -0. 08192   | 0     | 108   | 439   |
| MSTRG. 19825. 1  | coding    | 0. 203      | 81    | 768   | 922   |
| MSTRG. 19827. 1  | coding    | 0. 178      | 0     | 336   | 702   |
| MSTRG. 19831. 2  | coding    | 0. 208      | 129   | 501   | 11021 |
| MSTRG. 19840. 1  | noncoding | -0. 0172032 | 192   | 468   | 1172  |
| MSTRG. 19841. 1  | coding    | 0. 34       | 141   | 8823  | 14445 |
| MSTRG. 19848. 2  | coding    | 0. 294      | 240   | 1407  | 2350  |
| MSTRG. 19856. 8  | coding    | 0. 279      | 255   | 2106  | 2261  |
| MSTRG. 19856. 9  | coding    | 0. 279      | 240   | 2091  | 2246  |
| MSTRG. 19856. 11 | coding    | 0. 285      | 1458  | 3573  | 11569 |
| MSTRG. 19857. 2  | coding    | 0. 216      | 0     | 882   | 1038  |
| MSTRG. 19861. 2  | coding    | 0. 159      | 222   | 1308  | 2469  |
| MSTRG. 19863. 3  | coding    | 0. 288      | 30    | 1458  | 1901  |
| MSTRG. 19863. 2  | coding    | 0. 292      | 381   | 1836  | 2279  |
| MSTRG. 19863. 4  | coding    | 0. 285      | 876   | 2301  | 2739  |
| MSTRG. 19868. 1  | noncoding | -0. 012288  | 84    | 204   | 775   |
| MSTRG. 19868. 2  | noncoding | -0. 012288  | 84    | 204   | 635   |
| MSTRG. 19879. 1  | noncoding | -0. 0004096 | 0     | 0     | 844   |
| MSTRG. 19884. 1  | noncoding | -0. 0475136 | 3660  | 3873  | 7871  |
| MSTRG. 19884. 2  | noncoding | -0. 1048576 | 15    | 30    | 464   |
| MSTRG. 19884. 3  | noncoding | -0. 077824  | 933   | 969   | 2345  |
| MSTRG. 19884. 4  | noncoding | -0. 077824  | 897   | 933   | 1492  |
| MSTRG. 19885. 1  | noncoding | -0. 0253952 | 87    | 252   | 1973  |
| MSTRG. 19888. 1  | noncoding | -0. 057344  | 138   | 141   | 394   |
| MSTRG. 19893. 3  | coding    | 0. 306      | 171   | 1635  | 3466  |
| MSTRG. 19906. 4  | coding    | 0. 318      | 0     | 2769  | 3838  |
| MSTRG. 19907. 1  | noncoding | -0. 0897024 | 993   | 996   | 1151  |
| MSTRG. 19908. 2  | coding    | 0. 511      | 0     | 669   | 1298  |
| MSTRG. 19909. 5  | coding    | 0. 373      | 519   | 1284  | 2281  |
| MSTRG. 19909. 7  | coding    | 0. 376      | 1593  | 2394  | 3391  |
| MSTRG. 19909. 6  | coding    | 0. 381      | 189   | 930   | 1926  |
| MSTRG. 19904. 1  | coding    | 0. 305      | 486   | 1257  | 1444  |
| MSTRG. 19904. 2  | coding    | 0. 306      | 486   | 1275  | 1602  |
| MSTRG. 19904. 3  | coding    | 0. 278      | 471   | 948   | 1121  |
| MSTRG. 19905. 1  | coding    | 0. 452      | 75    | 1377  | 1634  |
| MSTRG. 19905. 2  | coding    | 0. 359      | 450   | 1128  | 1382  |
| MSTRG. 19917. 1  | coding    | 0. 168      | 1053  | 2253  | 3103  |

|                  |           |             |      |      |       |
|------------------|-----------|-------------|------|------|-------|
| MSTRG. 19918. 3  | coding    | 0. 256      | 0    | 1065 | 5389  |
| MSTRG. 19912. 3  | coding    | 0. 436      | 60   | 516  | 861   |
| MSTRG. 19912. 4  | coding    | 0. 43       | 93   | 555  | 884   |
| MSTRG. 19913. 2  | coding    | 0. 214      | 72   | 768  | 936   |
| MSTRG. 19914. 2  | coding    | 0. 45       | 9    | 4113 | 4933  |
| MSTRG. 19923. 1  | noncoding | -0. 0233472 | 201  | 309  | 462   |
| MSTRG. 19924. 1  | noncoding | -0. 045056  | 411  | 519  | 673   |
| MSTRG. 19924. 2  | noncoding | -0. 032768  | 264  | 450  | 831   |
| MSTRG. 19925. 3  | coding    | 0. 46       | 0    | 4776 | 5379  |
| MSTRG. 19925. 5  | coding    | 0. 488      | 69   | 2433 | 2992  |
| MSTRG. 19926. 5  | coding    | 0. 432      | 0    | 582  | 1182  |
| MSTRG. 19926. 4  | coding    | 0. 394      | 36   | 1092 | 1248  |
| MSTRG. 19926. 3  | coding    | 0. 37       | 252  | 1458 | 1613  |
| MSTRG. 19930. 1  | noncoding | -0. 036864  | 3297 | 3423 | 6170  |
| MSTRG. 19931. 1  | noncoding | -0. 0421888 | 174  | 177  | 462   |
| MSTRG. 19937. 1  | noncoding | -0. 0028672 | 204  | 339  | 1741  |
| MSTRG. 19938. 1  | noncoding | -0. 0004096 | 0    | 0    | 1036  |
| MSTRG. 19939. 4  | noncoding | -0. 0950272 | 63   | 306  | 1521  |
| MSTRG. 19941. 1  | coding    | 0. 12       | 0    | 669  | 965   |
| MSTRG. 19951. 1  | noncoding | -0. 0643072 | 105  | 348  | 911   |
| MSTRG. 19954. 2  | coding    | 0. 346      | 120  | 978  | 1257  |
| MSTRG. 19958. 1  | noncoding | -0. 049152  | 405  | 615  | 3883  |
| MSTRG. 19959. 1  | coding    | 0. 117      | 306  | 6990 | 8118  |
| MSTRG. 19959. 3  | coding    | 0. 117      | 306  | 6990 | 7615  |
| MSTRG. 19959. 5  | coding    | 0. 116      | 306  | 7059 | 8083  |
| MSTRG. 19959. 2  | coding    | 0. 117      | 303  | 6987 | 8013  |
| MSTRG. 19959. 8  | coding    | 0. 168      | 4395 | 6699 | 7068  |
| MSTRG. 19959. 9  | coding    | 0. 109      | 1941 | 7392 | 8160  |
| MSTRG. 19959. 10 | coding    | 0. 168      | 4389 | 6693 | 7060  |
| MSTRG. 19959. 11 | coding    | 0. 097      | 231  | 7671 | 8274  |
| MSTRG. 19959. 12 | coding    | 0. 131      | 876  | 5829 | 6932  |
| MSTRG. 19959. 13 | coding    | 0. 091      | 297  | 4935 | 6163  |
| MSTRG. 19942. 1  | coding    | 0. 043      | 114  | 1239 | 5893  |
| MSTRG. 19945. 1  | noncoding | -0. 126976  | 867  | 915  | 1319  |
| MSTRG. 19947. 1  | noncoding | -0. 053248  | 360  | 429  | 859   |
| MSTRG. 19946. 2  | coding    | 0. 204      | 156  | 1761 | 5399  |
| MSTRG. 19967. 1  | coding    | 0. 174      | 273  | 1293 | 27195 |
| MSTRG. 19967. 5  | coding    | 0. 174      | 171  | 1191 | 5841  |
| MSTRG. 19967. 4  | noncoding | -0. 0253952 | 5760 | 5910 | 10227 |
| MSTRG. 19967. 8  | noncoding | -0. 028672  | 861  | 945  | 1564  |
| MSTRG. 19965. 2  | coding    | 0. 416      | 171  | 1677 | 4051  |
| MSTRG. 19978. 1  | coding    | 0. 374      | 96   | 2259 | 2652  |
| MSTRG. 19978. 3  | coding    | 0. 27       | 405  | 2553 | 2947  |
| MSTRG. 19978. 2  | coding    | 0. 375      | 381  | 2586 | 2979  |
| MSTRG. 19978. 4  | coding    | 0. 27       | 573  | 2721 | 3102  |
| MSTRG. 19978. 5  | coding    | 0. 27       | 252  | 2400 | 2777  |
| MSTRG. 19979. 1  | noncoding | -0. 0782336 | 1950 | 2370 | 4170  |
| MSTRG. 19980. 1  | coding    | 0. 628      | 0    | 1281 | 1969  |
| MSTRG. 19983. 1  | coding    | 0. 234      | 435  | 837  | 3799  |
| MSTRG. 19985. 1  | noncoding | -0. 0294912 | 1170 | 1716 | 7334  |
| MSTRG. 19981. 1  | noncoding | -0. 108544  | 0    | 60   | 595   |
| MSTRG. 19990. 1  | noncoding | -0. 0065536 | 1170 | 1350 | 1885  |
| MSTRG. 19990. 2  | noncoding | -0. 0139264 | 396  | 564  | 857   |
| MSTRG. 20000. 1  | noncoding | -0. 0086016 | 156  | 327  | 1889  |

|                  |           |             |      |      |      |
|------------------|-----------|-------------|------|------|------|
| MSTRG. 20003. 1  | noncoding | -0. 0393216 | 72   | 597  | 4946 |
| MSTRG. 20006. 1  | noncoding | -0. 14336   | 111  | 168  | 680  |
| MSTRG. 20008. 1  | coding    | 0. 125      | 237  | 516  | 689  |
| MSTRG. 20013. 4  | coding    | 0. 568      | 180  | 5985 | 7005 |
| MSTRG. 20013. 5  | noncoding | -0. 0598016 | 351  | 537  | 5216 |
| MSTRG. 20015. 3  | coding    | 0. 076      | 885  | 1326 | 2221 |
| MSTRG. 20015. 5  | coding    | 0. 076      | 726  | 1167 | 2064 |
| MSTRG. 20015. 6  | noncoding | -0. 036864  | 1377 | 1500 | 3755 |
| MSTRG. 20018. 1  | coding    | 0. 243      | 0    | 933  | 1382 |
| MSTRG. 20018. 2  | coding    | 0. 243      | 0    | 933  | 1252 |
| MSTRG. 20018. 3  | coding    | 0. 269      | 0    | 708  | 1448 |
| MSTRG. 20027. 1  | coding    | 0. 105      | 411  | 1398 | 4142 |
| MSTRG. 20033. 1  | noncoding | -0. 0385024 | 1491 | 1548 | 1880 |
| MSTRG. 20037. 1  | noncoding | -0. 0004096 | 273  | 387  | 856  |
| MSTRG. 20038. 4  | noncoding | -0. 02048   | 18   | 63   | 1332 |
| MSTRG. 20047. 1  | noncoding | -0. 008192  | 456  | 492  | 2863 |
| MSTRG. 20056. 1  | coding    | 0. 038      | 558  | 735  | 1199 |
| MSTRG. 20056. 4  | noncoding | -0. 02048   | 1383 | 1551 | 1870 |
| MSTRG. 20057. 3  | coding    | 0. 128      | 108  | 618  | 1273 |
| MSTRG. 20057. 4  | coding    | 0. 128      | 69   | 579  | 1052 |
| MSTRG. 20059. 1  | coding    | 0. 074      | 723  | 5616 | 5773 |
| MSTRG. 20059. 5  | noncoding | -0. 0069632 | 696  | 849  | 1884 |
| MSTRG. 20061. 3  | noncoding | -0. 0299008 | 252  | 507  | 1684 |
| MSTRG. 20061. 2  | noncoding | -0. 0299008 | 252  | 507  | 2311 |
| MSTRG. 20063. 1  | noncoding | -0. 032768  | 381  | 465  | 848  |
| MSTRG. 20066. 1  | noncoding | -0. 114688  | 570  | 582  | 975  |
| MSTRG. 20069. 4  | coding    | 0. 215      | 117  | 390  | 974  |
| MSTRG. 20074. 2  | coding    | 0. 323      | 0    | 1584 | 2763 |
| MSTRG. 20074. 4  | coding    | 0. 334      | 0    | 1533 | 2712 |
| MSTRG. 20075. 1  | noncoding | -0. 038912  | 90   | 249  | 2309 |
| MSTRG. 20079. 1  | coding    | 0. 036      | 408  | 1872 | 4183 |
| MSTRG. 20086. 5  | coding    | 0. 083      | 2652 | 4641 | 6108 |
| MSTRG. 20086. 6  | coding    | 0. 083      | 2700 | 4689 | 8748 |
| MSTRG. 20086. 9  | coding    | 0. 083      | 2916 | 4905 | 6370 |
| MSTRG. 20087. 1  | noncoding | -0. 026624  | 372  | 570  | 6840 |
| MSTRG. 20086. 10 | coding    | 0. 083      | 3267 | 5256 | 6721 |
| MSTRG. 20088. 2  | coding    | 0. 099      | 513  | 942  | 1247 |
| MSTRG. 20090. 1  | coding    | 0. 345      | 0    | 288  | 442  |
| MSTRG. 20092. 2  | coding    | 0. 123      | 138  | 1716 | 2661 |
| MSTRG. 20094. 2  | coding    | 0. 184      | 1443 | 1986 | 3840 |
| MSTRG. 20097. 2  | coding    | 0. 12       | 90   | 1218 | 2119 |
| MSTRG. 20098. 1  | noncoding | -0. 036864  | 468  | 648  | 6857 |
| MSTRG. 20107. 1  | noncoding | -0. 0004096 | 336  | 411  | 565  |
| MSTRG. 20109. 1  | noncoding | -0. 0110592 | 2724 | 2895 | 3131 |
| MSTRG. 20110. 1  | coding    | 0. 257      | 423  | 1200 | 1587 |
| MSTRG. 20110. 2  | coding    | 0. 248      | 294  | 978  | 1363 |
| MSTRG. 20110. 3  | coding    | 0. 237      | 126  | 816  | 4983 |
| MSTRG. 20114. 1  | coding    | 0. 135      | 225  | 1509 | 2317 |
| MSTRG. 20114. 2  | coding    | 0. 125      | 168  | 1155 | 1600 |
| MSTRG. 20114. 4  | coding    | 0. 128      | 369  | 1521 | 2328 |
| MSTRG. 20115. 1  | noncoding | -0. 0356352 | 3909 | 4074 | 6913 |
| MSTRG. 20112. 1  | noncoding | -0. 0057344 | 60   | 75   | 310  |
| MSTRG. 20118. 1  | coding    | 0. 08       | 0    | 234  | 398  |
| MSTRG. 20117. 3  | coding    | 0. 228      | 615  | 1665 | 2502 |

|                 |           |             |       |       |       |
|-----------------|-----------|-------------|-------|-------|-------|
| MSTRG. 20121. 2 | noncoding | -0. 0499712 | 843   | 1137  | 1462  |
| MSTRG. 20121. 1 | noncoding | -0. 049152  | 1470  | 1557  | 1881  |
| MSTRG. 20119. 1 | noncoding | -0. 0380928 | 282   | 558   | 872   |
| MSTRG. 20120. 1 | coding    | 0. 345      | 375   | 2076  | 2688  |
| MSTRG. 20126. 2 | coding    | 0. 471      | 342   | 1308  | 3901  |
| MSTRG. 20126. 4 | noncoding | -0. 0761856 | 579   | 846   | 1126  |
| MSTRG. 20126. 3 | coding    | 0. 471      | 126   | 918   | 3922  |
| MSTRG. 20128. 2 | noncoding | -0. 0892928 | 147   | 567   | 1095  |
| MSTRG. 20132. 3 | coding    | 0. 227      | 435   | 855   | 1058  |
| MSTRG. 20132. 4 | coding    | 0. 227      | 855   | 1275  | 1479  |
| MSTRG. 20135. 1 | coding    | 0. 18       | 243   | 1959  | 2710  |
| MSTRG. 20148. 1 | noncoding | -0. 0417792 | 186   | 348   | 2016  |
| MSTRG. 20158. 1 | noncoding | -0. 0004096 | 0     | 0     | 592   |
| MSTRG. 20158. 2 | noncoding | -0. 0004096 | 0     | 0     | 626   |
| MSTRG. 20158. 5 | coding    | 0. 146      | 0     | 1689  | 4113  |
| MSTRG. 20158. 6 | noncoding | -0. 0200704 | 1503  | 1635  | 2146  |
| MSTRG. 20162. 4 | coding    | 0. 201      | 0     | 3498  | 4436  |
| MSTRG. 20163. 1 | noncoding | -0. 008192  | 60    | 141   | 1181  |
| MSTRG. 20164. 1 | noncoding | -0. 073728  | 1173  | 1236  | 2273  |
| MSTRG. 20168. 1 | noncoding | -0. 026624  | 9606  | 10374 | 11743 |
| MSTRG. 20154. 2 | coding    | 0. 131      | 267   | 870   | 2884  |
| MSTRG. 20155. 1 | noncoding | -0. 04096   | 4098  | 4200  | 7367  |
| MSTRG. 20156. 1 | noncoding | -0. 0004096 | 6354  | 6492  | 7982  |
| MSTRG. 20157. 1 | coding    | 0. 052      | 3780  | 4341  | 4496  |
| MSTRG. 20154. 3 | coding    | 0. 114      | 945   | 1365  | 4790  |
| MSTRG. 20172. 3 | coding    | 0. 109      | 594   | 1434  | 1668  |
| MSTRG. 20173. 1 | noncoding | -0. 073728  | 2037  | 2109  | 2419  |
| MSTRG. 20177. 2 | coding    | 0. 354      | 75    | 1257  | 1872  |
| MSTRG. 20179. 1 | noncoding | -0. 0004096 | 87    | 222   | 635   |
| MSTRG. 20180. 1 | coding    | 0. 127      | 0     | 195   | 385   |
| MSTRG. 20186. 1 | coding    | 0. 467      | 0     | 1431  | 3226  |
| MSTRG. 20188. 1 | noncoding | -0. 0376832 | 468   | 663   | 1239  |
| MSTRG. 20189. 2 | noncoding | -0. 016384  | 15    | 138   | 336   |
| MSTRG. 20189. 1 | noncoding | -0. 008192  | 15    | 153   | 395   |
| MSTRG. 20190. 1 | noncoding | -0. 0712704 | 51    | 117   | 413   |
| MSTRG. 20193. 2 | noncoding | -0. 0360448 | 3372  | 4158  | 19034 |
| MSTRG. 20193. 3 | noncoding | -0. 0761856 | 0     | 105   | 26598 |
| MSTRG. 20198. 2 | coding    | 0. 437      | 42    | 1830  | 4055  |
| MSTRG. 20198. 1 | coding    | 0. 438      | 42    | 1854  | 5302  |
| MSTRG. 20199. 1 | noncoding | -0. 0462848 | 147   | 414   | 571   |
| MSTRG. 20200. 3 | coding    | 0. 457      | 0     | 2316  | 2515  |
| MSTRG. 20202. 1 | noncoding | -0. 0794624 | 0     | 558   | 715   |
| MSTRG. 20203. 2 | coding    | 0. 397      | 567   | 1548  | 2421  |
| MSTRG. 20210. 4 | coding    | 0. 197      | 1575  | 3525  | 4147  |
| MSTRG. 20210. 3 | coding    | 0. 196      | 807   | 2754  | 3375  |
| MSTRG. 20210. 5 | coding    | 0. 132      | 15690 | 15942 | 25454 |
| MSTRG. 20210. 6 | noncoding | -0. 08192   | 9150  | 9234  | 12562 |
| MSTRG. 20212. 1 | noncoding | -0. 024576  | 3951  | 4059  | 4608  |
| MSTRG. 20212. 2 | noncoding | -0. 024576  | 2322  | 2430  | 10213 |
| MSTRG. 20212. 3 | noncoding | -0. 049152  | 372   | 408   | 1385  |
| MSTRG. 20212. 4 | noncoding | -0. 0012288 | 3312  | 3363  | 3897  |
| MSTRG. 20210. 7 | noncoding | -0. 0049152 | 54    | 201   | 903   |
| MSTRG. 20207. 2 | coding    | 0. 444      | 927   | 2397  | 2685  |
| MSTRG. 20207. 3 | coding    | 0. 442      | 0     | 1467  | 1621  |

|                  |           |             |      |      |       |
|------------------|-----------|-------------|------|------|-------|
| MSTRG. 20207. 4  | coding    | 0. 443      | 15   | 1485 | 1772  |
| MSTRG. 20208. 3  | coding    | 0. 486      | 2184 | 5043 | 5441  |
| MSTRG. 20213. 5  | coding    | 0. 308      | 159  | 720  | 6732  |
| MSTRG. 20213. 6  | coding    | 0. 327      | 63   | 663  | 4498  |
| MSTRG. 20214. 1  | noncoding | -0. 0344064 | 3243 | 3381 | 4258  |
| MSTRG. 20215. 1  | noncoding | -0. 014336  | 417  | 570  | 723   |
| MSTRG. 20216. 1  | noncoding | -0. 045056  | 1227 | 1308 | 6665  |
| MSTRG. 20218. 4  | coding    | 0. 153      | 201  | 2553 | 4149  |
| MSTRG. 20218. 5  | coding    | 0. 149      | 303  | 2592 | 4189  |
| MSTRG. 20220. 1  | noncoding | -0. 012288  | 885  | 3009 | 3381  |
| MSTRG. 20225. 1  | noncoding | -0. 0745472 | 573  | 840  | 997   |
| MSTRG. 20225. 2  | noncoding | -0. 0421888 | 267  | 570  | 793   |
| MSTRG. 20226. 2  | coding    | 0. 556      | 0    | 1080 | 1307  |
| MSTRG. 20226. 3  | coding    | 0. 55       | 0    | 1248 | 1602  |
| MSTRG. 20226. 4  | coding    | 0. 461      | 0    | 801  | 1269  |
| MSTRG. 20227. 6  | coding    | 0. 222      | 300  | 5805 | 6505  |
| MSTRG. 20227. 5  | coding    | 0. 222      | 852  | 6885 | 7465  |
| MSTRG. 20227. 3  | coding    | 0. 209      | 57   | 6696 | 7278  |
| MSTRG. 20227. 4  | coding    | 0. 209      | 57   | 6693 | 7275  |
| MSTRG. 20227. 8  | coding    | 0. 222      | 2799 | 8832 | 9411  |
| MSTRG. 20227. 10 | coding    | 0. 223      | 864  | 6909 | 7457  |
| MSTRG. 20227. 9  | coding    | 0. 224      | 282  | 6315 | 6865  |
| MSTRG. 20227. 11 | coding    | 0. 222      | 1311 | 7347 | 7893  |
| MSTRG. 20227. 12 | coding    | 0. 224      | 477  | 6507 | 7042  |
| MSTRG. 20228. 1  | noncoding | -0. 1024    | 264  | 339  | 495   |
| MSTRG. 20229. 1  | coding    | 0. 467      | 216  | 5679 | 7998  |
| MSTRG. 20222. 3  | coding    | 0. 254      | 0    | 258  | 1400  |
| MSTRG. 20222. 4  | coding    | 0. 392      | 108  | 828  | 1035  |
| MSTRG. 20223. 1  | coding    | 0. 433      | 0    | 1497 | 7173  |
| MSTRG. 20223. 2  | coding    | 0. 433      | 0    | 1497 | 4625  |
| MSTRG. 20241. 1  | coding    | 0. 448      | 630  | 5262 | 5417  |
| MSTRG. 20241. 2  | coding    | 0. 449      | 630  | 5220 | 5375  |
| MSTRG. 20241. 3  | coding    | 0. 448      | 495  | 5127 | 5281  |
| MSTRG. 20241. 5  | coding    | 0. 449      | 375  | 4965 | 5120  |
| MSTRG. 20241. 4  | coding    | 0. 45       | 558  | 5316 | 6165  |
| MSTRG. 20241. 6  | coding    | 0. 449      | 237  | 4881 | 5034  |
| MSTRG. 20231. 1  | noncoding | -0. 0303104 | 195  | 1548 | 1703  |
| MSTRG. 20231. 2  | noncoding | -0. 0352256 | 105  | 1176 | 1357  |
| MSTRG. 20232. 1  | noncoding | -0. 0364544 | 147  | 285  | 507   |
| MSTRG. 20233. 1  | coding    | 0. 202      | 0    | 1923 | 2172  |
| MSTRG. 20242. 4  | coding    | 0. 246      | 0    | 1482 | 7675  |
| MSTRG. 20242. 1  | coding    | 0. 243      | 0    | 1488 | 4547  |
| MSTRG. 20242. 2  | coding    | 0. 247      | 0    | 1476 | 4535  |
| MSTRG. 20242. 3  | coding    | 0. 23       | 378  | 1776 | 4835  |
| MSTRG. 20242. 5  | coding    | 0. 239      | 378  | 1782 | 7976  |
| MSTRG. 20242. 8  | coding    | 0. 235      | 240  | 1656 | 7846  |
| MSTRG. 20244. 2  | coding    | 0. 349      | 411  | 1788 | 2794  |
| MSTRG. 20245. 1  | coding    | 0. 336      | 1215 | 1989 | 2173  |
| MSTRG. 20246. 1  | coding    | 0. 194      | 0    | 750  | 13824 |
| MSTRG. 20246. 3  | coding    | 0. 2        | 0    | 780  | 1773  |
| MSTRG. 20249. 4  | coding    | 0. 158      | 1140 | 3390 | 4189  |
| MSTRG. 20250. 2  | coding    | 0. 186      | 0    | 1797 | 4516  |
| MSTRG. 20250. 4  | coding    | 0. 183      | 0    | 1773 | 4754  |
| MSTRG. 20250. 7  | coding    | 0. 149      | 0    | 2259 | 4953  |

|                  |           |             |      |      |      |
|------------------|-----------|-------------|------|------|------|
| MSTRG. 20250. 8  | coding    | 0. 183      | 0    | 1773 | 4008 |
| MSTRG. 20251. 1  | noncoding | -0. 004096  | 444  | 549  | 966  |
| MSTRG. 20247. 1  | coding    | 0. 264      | 0    | 3765 | 7325 |
| MSTRG. 20247. 2  | coding    | 0. 266      | 0    | 3756 | 7402 |
| MSTRG. 20248. 1  | noncoding | -0. 016384  | 801  | 924  | 1544 |
| MSTRG. 20257. 1  | coding    | 0. 248      | 309  | 1170 | 1483 |
| MSTRG. 20257. 2  | coding    | 0. 159      | 312  | 585  | 739  |
| MSTRG. 20269. 2  | noncoding | -0. 0987136 | 2454 | 4305 | 4572 |
| MSTRG. 20270. 1  | noncoding | -0. 1277952 | 0    | 96   | 822  |
| MSTRG. 20270. 2  | noncoding | -0. 018432  | 426  | 900  | 1053 |
| MSTRG. 20270. 3  | noncoding | -0. 0290816 | 399  | 813  | 966  |
| MSTRG. 20271. 2  | coding    | 0. 603      | 759  | 2880 | 3419 |
| MSTRG. 20272. 1  | coding    | 0. 551      | 0    | 1209 | 3735 |
| MSTRG. 20274. 1  | noncoding | -0. 0098304 | 0    | 99   | 423  |
| MSTRG. 20274. 5  | coding    | 0. 422      | 414  | 1917 | 2880 |
| MSTRG. 20274. 4  | coding    | 0. 422      | 573  | 2076 | 3041 |
| MSTRG. 20274. 6  | noncoding | -0. 0913408 | 570  | 1029 | 2543 |
| MSTRG. 20277. 1  | noncoding | -0. 0733184 | 0    | 642  | 1921 |
| MSTRG. 20278. 2  | coding    | 0. 236      | 132  | 510  | 1023 |
| MSTRG. 20279. 1  | coding    | 0. 37       | 447  | 1998 | 2167 |
| MSTRG. 20281. 2  | coding    | 0. 463      | 960  | 2280 | 2643 |
| MSTRG. 20281. 4  | coding    | 0. 466      | 246  | 1572 | 1991 |
| MSTRG. 20287. 3  | coding    | 0. 439      | 1275 | 3525 | 4625 |
| MSTRG. 20288. 2  | coding    | 0. 297      | 495  | 1224 | 1845 |
| MSTRG. 20288. 3  | coding    | 0. 276      | 144  | 858  | 1479 |
| MSTRG. 20290. 1  | coding    | 0. 225      | 966  | 3012 | 6843 |
| MSTRG. 20291. 3  | coding    | 0. 402      | 0    | 432  | 834  |
| MSTRG. 20292. 1  | coding    | 0. 431      | 426  | 3234 | 4967 |
| MSTRG. 20292. 2  | coding    | 0. 429      | 423  | 3249 | 4982 |
| MSTRG. 20292. 3  | coding    | 0. 431      | 519  | 3327 | 5060 |
| MSTRG. 20292. 4  | coding    | 0. 431      | 327  | 3135 | 4740 |
| MSTRG. 20292. 7  | coding    | 0. 412      | 738  | 3384 | 5115 |
| MSTRG. 20293. 1  | noncoding | -0. 0679936 | 939  | 1446 | 1600 |
| MSTRG. 20298. 3  | coding    | 0. 278      | 645  | 1425 | 4786 |
| MSTRG. 20298. 4  | coding    | 0. 318      | 948  | 2271 | 5632 |
| MSTRG. 20298. 5  | coding    | 0. 318      | 0    | 1446 | 4807 |
| MSTRG. 20298. 6  | coding    | 0. 317      | 0    | 1422 | 4782 |
| MSTRG. 20298. 7  | coding    | 0. 318      | 564  | 1884 | 5245 |
| MSTRG. 20299. 1  | noncoding | -0. 004096  | 1581 | 1806 | 2807 |
| MSTRG. 20315. 2  | coding    | 0. 334      | 1515 | 6633 | 7731 |
| MSTRG. 20315. 4  | coding    | 0. 377      | 0    | 3189 | 4281 |
| MSTRG. 20315. 6  | coding    | 0. 331      | 144  | 2784 | 3016 |
| MSTRG. 20315. 5  | coding    | 0. 41       | 309  | 3162 | 3393 |
| MSTRG. 20315. 7  | noncoding | -0. 049152  | 180  | 282  | 1111 |
| MSTRG. 20315. 11 | coding    | 0. 218      | 1554 | 3810 | 5507 |
| MSTRG. 20315. 14 | coding    | 0. 213      | 2178 | 3846 | 5468 |
| MSTRG. 20315. 16 | coding    | 0. 22       | 1098 | 2613 | 4234 |
| MSTRG. 20318. 1  | noncoding | -0. 02048   | 246  | 318  | 581  |
| MSTRG. 20308. 1  | noncoding | -0. 0323584 | 216  | 756  | 911  |
| MSTRG. 20310. 1  | coding    | 0. 558      | 195  | 1029 | 3013 |
| MSTRG. 20313. 1  | coding    | 0. 207      | 84   | 585  | 1071 |
| MSTRG. 20313. 2  | coding    | 0. 303      | 519  | 1356 | 1844 |
| MSTRG. 20313. 3  | coding    | 0. 353      | 135  | 1320 | 1806 |
| MSTRG. 20313. 4  | noncoding | -0. 0393216 | 303  | 372  | 528  |

|                  |           |             |       |       |       |
|------------------|-----------|-------------|-------|-------|-------|
| MSTRG. 20313. 5  | coding    | 0. 177      | 156   | 630   | 941   |
| MSTRG. 20334. 1  | coding    | 0. 064      | 144   | 2484  | 4028  |
| MSTRG. 20335. 3  | coding    | 0. 118      | 57    | 378   | 549   |
| MSTRG. 20338. 1  | noncoding | -0. 0233472 | 12    | 198   | 3776  |
| MSTRG. 20338. 2  | noncoding | -0. 04096   | 822   | 927   | 2480  |
| MSTRG. 20339. 3  | noncoding | -0. 0581632 | 1086  | 1236  | 1393  |
| MSTRG. 20339. 4  | noncoding | -0. 0581632 | 1239  | 1389  | 1546  |
| MSTRG. 20345. 2  | coding    | 0. 41       | 0     | 507   | 5715  |
| MSTRG. 20346. 2  | coding    | 0. 332      | 0     | 729   | 1005  |
| MSTRG. 20347. 4  | coding    | 0. 413      | 630   | 1251  | 1701  |
| MSTRG. 20321. 1  | noncoding | -0. 1273856 | 0     | 126   | 321   |
| MSTRG. 20328. 4  | noncoding | -0. 1409024 | 0     | 150   | 1211  |
| MSTRG. 20328. 5  | noncoding | -0. 1409024 | 0     | 150   | 980   |
| MSTRG. 20328. 6  | noncoding | -0. 1409024 | 0     | 150   | 1240  |
| MSTRG. 20330. 1  | noncoding | -0. 0438272 | 117   | 219   | 452   |
| MSTRG. 20332. 6  | noncoding | -0. 114688  | 1248  | 1338  | 2976  |
| MSTRG. 20354. 1  | noncoding | -0. 0004096 | 60    | 123   | 312   |
| MSTRG. 20361. 1  | noncoding | -0. 0004096 | 0     | 0     | 327   |
| MSTRG. 20362. 1  | noncoding | -0. 0004096 | 243   | 243   | 549   |
| MSTRG. 20362. 2  | noncoding | -0. 053248  | 546   | 636   | 1804  |
| MSTRG. 20362. 3  | noncoding | -0. 024576  | 78    | 177   | 1074  |
| MSTRG. 20366. 1  | noncoding | -0. 032768  | 738   | 867   | 2941  |
| MSTRG. 20367. 3  | coding    | 0. 161      | 72    | 510   | 2145  |
| MSTRG. 20367. 4  | coding    | 0. 165      | 72    | 513   | 2148  |
| MSTRG. 20367. 6  | coding    | 0. 217      | 42    | 471   | 877   |
| MSTRG. 20367. 5  | coding    | 0. 172      | 42    | 456   | 2122  |
| MSTRG. 20376. 4  | coding    | 0. 461      | 60    | 780   | 2229  |
| MSTRG. 20376. 5  | coding    | 0. 482      | 675   | 1281  | 2731  |
| MSTRG. 20376. 7  | coding    | 0. 478      | 57    | 1029  | 2478  |
| MSTRG. 20376. 8  | coding    | 0. 482      | 591   | 1197  | 3691  |
| MSTRG. 20376. 6  | coding    | 0. 482      | 342   | 948   | 12127 |
| MSTRG. 20376. 9  | noncoding | -0. 0393216 | 291   | 915   | 13832 |
| MSTRG. 20376. 10 | coding    | 0. 482      | 15216 | 15822 | 27002 |
| MSTRG. 20378. 2  | coding    | 0. 243      | 93    | 1542  | 1800  |
| MSTRG. 20382. 3  | coding    | 0. 504      | 798   | 4401  | 8719  |
| MSTRG. 20382. 5  | coding    | 0. 5        | 789   | 4428  | 8752  |
| MSTRG. 20382. 8  | coding    | 0. 509      | 543   | 4011  | 4164  |
| MSTRG. 20387. 2  | coding    | 0. 157      | 999   | 3114  | 4997  |
| MSTRG. 20387. 8  | noncoding | -0. 0008192 | 513   | 795   | 1072  |
| MSTRG. 20387. 7  | coding    | 0. 157      | 4923  | 7038  | 8916  |
| MSTRG. 20388. 1  | noncoding | -0. 0475136 | 195   | 570   | 948   |
| MSTRG. 20393. 1  | noncoding | -0. 049152  | 360   | 462   | 1756  |
| MSTRG. 20394. 1  | coding    | 0. 381      | 30    | 2889  | 3944  |
| MSTRG. 20395. 1  | coding    | 0. 429      | 0     | 1308  | 6335  |
| MSTRG. 20395. 2  | coding    | 0. 429      | 0     | 1308  | 6167  |
| MSTRG. 20395. 3  | coding    | 0. 5        | 0     | 1086  | 5448  |
| MSTRG. 20395. 4  | coding    | 0. 366      | 87    | 1236  | 5810  |
| MSTRG. 20395. 14 | coding    | 0. 391      | 276   | 1470  | 2757  |
| MSTRG. 20395. 10 | coding    | 0. 464      | 0     | 1257  | 2544  |
| MSTRG. 20395. 11 | coding    | 0. 464      | 0     | 1257  | 2485  |
| MSTRG. 20395. 7  | coding    | 0. 464      | 0     | 1257  | 2544  |
| MSTRG. 20395. 8  | coding    | 0. 43       | 0     | 1302  | 2649  |
| MSTRG. 20395. 12 | coding    | 0. 393      | 1185  | 2334  | 3014  |
| MSTRG. 20395. 13 | coding    | 0. 306      | 0     | 1845  | 2593  |



|                 |           |             |       |       |       |
|-----------------|-----------|-------------|-------|-------|-------|
| MSTRG. 20395. 9 | coding    | 0. 429      | 0     | 1308  | 2367  |
| MSTRG. 20396. 1 | noncoding | -0. 1110016 | 123   | 606   | 2277  |
| MSTRG. 20397. 1 | coding    | 0. 398      | 636   | 1686  | 1884  |
| MSTRG. 20396. 2 | noncoding | -0. 09216   | 489   | 762   | 2224  |
| MSTRG. 20396. 3 | noncoding | -0. 09216   | 336   | 609   | 2070  |
| MSTRG. 20396. 4 | noncoding | -0. 1052672 | 279   | 522   | 1824  |
| MSTRG. 20390. 2 | coding    | 0. 184      | 0     | 2379  | 5109  |
| MSTRG. 20392. 1 | coding    | 0. 447      | 0     | 5289  | 7055  |
| MSTRG. 20400. 7 | coding    | 0. 111      | 0     | 276   | 657   |
| MSTRG. 20401. 1 | noncoding | -0. 0012288 | 1122  | 1203  | 1732  |
| MSTRG. 20402. 1 | noncoding | -0. 0004096 | 372   | 516   | 1375  |
| MSTRG. 20403. 1 | noncoding | -0. 0094208 | 537   | 729   | 1203  |
| MSTRG. 20407. 1 | noncoding | -0. 0487424 | 2364  | 3285  | 4555  |
| MSTRG. 20414. 2 | coding    | 0. 428      | 0     | 2310  | 2845  |
| MSTRG. 20415. 1 | noncoding | -0. 055296  | 780   | 1953  | 2112  |
| MSTRG. 20416. 1 | coding    | 0. 51       | 0     | 966   | 4047  |
| MSTRG. 20421. 1 | coding    | 0. 201      | 0     | 1104  | 2505  |
| MSTRG. 20421. 2 | coding    | 0. 201      | 0     | 1104  | 1954  |
| MSTRG. 20421. 3 | coding    | 0. 201      | 0     | 1104  | 5123  |
| MSTRG. 20424. 1 | noncoding | -0. 0004096 | 888   | 888   | 1337  |
| MSTRG. 20426. 1 | coding    | 0. 45       | 660   | 2328  | 4945  |
| MSTRG. 20426. 2 | coding    | 0. 45       | 429   | 2097  | 4655  |
| MSTRG. 20429. 2 | coding    | 0. 344      | 66    | 624   | 777   |
| MSTRG. 20430. 1 | noncoding | -0. 0008192 | 42    | 48    | 204   |
| MSTRG. 20433. 4 | coding    | 0. 441      | 426   | 3102  | 3560  |
| MSTRG. 20434. 1 | noncoding | -0. 0053248 | 2745  | 2871  | 5323  |
| MSTRG. 20433. 7 | coding    | 0. 34       | 237   | 1011  | 1312  |
| MSTRG. 20431. 2 | coding    | 0. 307      | 3045  | 4341  | 4535  |
| MSTRG. 20431. 3 | coding    | 0. 281      | 0     | 879   | 1576  |
| MSTRG. 20431. 4 | noncoding | -0. 1142784 | 3657  | 3957  | 4388  |
| MSTRG. 20438. 4 | coding    | 0. 225      | 0     | 399   | 1319  |
| MSTRG. 20439. 1 | coding    | 0. 497      | 0     | 1119  | 15062 |
| MSTRG. 20439. 2 | coding    | 0. 525      | 0     | 1029  | 5018  |
| MSTRG. 20439. 3 | noncoding | -0. 2142208 | 0     | 180   | 3005  |
| MSTRG. 20440. 1 | noncoding | -0. 0585728 | 10980 | 11313 | 12225 |
| MSTRG. 20440. 2 | coding    | 0. 12       | 4296  | 4563  | 5872  |
| MSTRG. 20446. 2 | noncoding | -0. 0512    | 765   | 1980  | 2186  |
| MSTRG. 20451. 2 | coding    | 0. 351      | 36    | 1539  | 10263 |
| MSTRG. 20452. 1 | noncoding | -0. 1355776 | 0     | 135   | 292   |
| MSTRG. 20453. 1 | coding    | 0. 112      | 558   | 888   | 2197  |
| MSTRG. 20455. 2 | coding    | 0. 091      | 678   | 840   | 1068  |
| MSTRG. 20457. 2 | coding    | 0. 053      | 975   | 1605  | 3257  |
| MSTRG. 20457. 4 | coding    | 0. 053      | 816   | 1446  | 4749  |
| MSTRG. 20457. 7 | coding    | 0. 053      | 771   | 1401  | 3228  |
| MSTRG. 20457. 6 | coding    | 0. 053      | 1446  | 2076  | 3904  |
| MSTRG. 20457. 8 | coding    | 0. 035      | 1101  | 1251  | 2394  |
| MSTRG. 20469. 1 | coding    | 0. 276      | 87    | 729   | 988   |
| MSTRG. 20469. 2 | coding    | 0. 29       | 72    | 813   | 1075  |
| MSTRG. 20471. 1 | noncoding | -0. 016384  | 2568  | 2649  | 3702  |
| MSTRG. 20471. 2 | noncoding | -0. 0090112 | 1254  | 1419  | 1573  |
| MSTRG. 20473. 2 | noncoding | -0. 0512    | 138   | 333   | 811   |
| MSTRG. 20474. 1 | coding    | 0. 268      | 0     | 144   | 298   |
| MSTRG. 20476. 1 | noncoding | -0. 008192  | 141   | 189   | 677   |
| MSTRG. 20482. 6 | noncoding | -0. 073728  | 2169  | 2247  | 3990  |

|                 |           |             |      |      |       |
|-----------------|-----------|-------------|------|------|-------|
| MSTRG. 20483. 1 | noncoding | -0. 0380928 | 807  | 891  | 8118  |
| MSTRG. 20484. 1 | noncoding | -0. 0045056 | 2817 | 3009 | 3180  |
| MSTRG. 20486. 1 | noncoding | -0. 016384  | 159  | 246  | 1001  |
| MSTRG. 20479. 1 | noncoding | -0. 008192  | 510  | 513  | 703   |
| MSTRG. 20489. 1 | noncoding | -0. 0192512 | 405  | 549  | 2951  |
| MSTRG. 20504. 2 | noncoding | -0. 0458752 | 417  | 834  | 991   |
| MSTRG. 20505. 1 | coding    | 0. 068      | 0    | 1680 | 3616  |
| MSTRG. 20506. 1 | coding    | 0. 072      | 357  | 879  | 1498  |
| MSTRG. 20512. 1 | noncoding | -0. 03072   | 21   | 300  | 5212  |
| MSTRG. 20512. 2 | noncoding | -0. 0569344 | 18   | 309  | 668   |
| MSTRG. 20512. 3 | noncoding | -0. 0917504 | 933  | 1206 | 1900  |
| MSTRG. 20512. 4 | noncoding | -0. 03072   | 6    | 285  | 1543  |
| MSTRG. 20512. 5 | noncoding | -0. 0274432 | 1008 | 1245 | 3974  |
| MSTRG. 20512. 6 | noncoding | -0. 0577536 | 102  | 117  | 1685  |
| MSTRG. 20514. 1 | noncoding | -0. 004096  | 0    | 123  | 441   |
| MSTRG. 20516. 1 | noncoding | -0. 0004096 | 0    | 0    | 222   |
| MSTRG. 20526. 1 | noncoding | -0. 028672  | 1164 | 1194 | 2703  |
| MSTRG. 20528. 1 | coding    | 0. 094      | 2139 | 3123 | 4369  |
| MSTRG. 20547. 1 | noncoding | -0. 110592  | 894  | 966  | 1154  |
| MSTRG. 20552. 1 | noncoding | -0. 2797568 | 0    | 495  | 650   |
| MSTRG. 20565. 1 | noncoding | -0. 0004096 | 0    | 0    | 395   |
| MSTRG. 20566. 1 | noncoding | -0. 057344  | 705  | 804  | 1251  |
| MSTRG. 20568. 2 | coding    | 0. 086      | 1059 | 2700 | 3106  |
| MSTRG. 20569. 1 | noncoding | -0. 1011712 | 81   | 87   | 486   |
| MSTRG. 20570. 1 | noncoding | -0. 0110592 | 207  | 285  | 540   |
| MSTRG. 20571. 1 | coding    | 0. 193      | 96   | 1515 | 1668  |
| MSTRG. 20574. 1 | noncoding | -0. 02048   | 453  | 585  | 968   |
| MSTRG. 20577. 2 | coding    | 0. 261      | 789  | 2067 | 3852  |
| MSTRG. 20577. 3 | noncoding | -0. 032768  | 1626 | 1725 | 2433  |
| MSTRG. 20579. 2 | noncoding | -0. 0270336 | 381  | 549  | 4341  |
| MSTRG. 20579. 4 | coding    | 0. 17       | 63   | 963  | 4846  |
| MSTRG. 20580. 1 | noncoding | -0. 0299008 | 342  | 372  | 1232  |
| MSTRG. 20581. 1 | noncoding | -0. 0008192 | 1917 | 1974 | 2709  |
| MSTRG. 20583. 1 | coding    | 0. 284      | 0    | 372  | 6247  |
| MSTRG. 20584. 1 | noncoding | -0. 0004096 | 0    | 0    | 820   |
| MSTRG. 20593. 2 | coding    | 0. 634      | 0    | 546  | 7179  |
| MSTRG. 20593. 3 | coding    | 0. 634      | 0    | 546  | 3061  |
| MSTRG. 20608. 7 | coding    | 0. 15       | 0    | 1452 | 1934  |
| MSTRG. 20608. 6 | coding    | 0. 175      | 0    | 2376 | 4264  |
| MSTRG. 20609. 1 | noncoding | -0. 0393216 | 5118 | 5697 | 8063  |
| MSTRG. 20610. 1 | coding    | 0. 046      | 7140 | 7962 | 10253 |
| MSTRG. 20608. 8 | coding    | 0. 202      | 2139 | 3942 | 5779  |
| MSTRG. 20611. 1 | noncoding | -0. 069632  | 879  | 972  | 3372  |
| MSTRG. 20612. 1 | noncoding | -0. 024576  | 426  | 555  | 5346  |
| MSTRG. 20608. 9 | coding    | 0. 19       | 540  | 1524 | 10381 |
| MSTRG. 20603. 1 | noncoding | -0. 02048   | 426  | 561  | 4484  |
| MSTRG. 20603. 2 | noncoding | -0. 012288  | 699  | 801  | 3622  |
| MSTRG. 20603. 3 | coding    | 0. 21       | 165  | 867  | 10394 |
| MSTRG. 20613. 1 | coding    | 0. 437      | 18   | 564  | 1514  |
| MSTRG. 20613. 2 | coding    | 0. 45       | 0    | 555  | 1424  |
| MSTRG. 20614. 1 | noncoding | -0. 0004096 | 0    | 0    | 346   |
| MSTRG. 20616. 1 | noncoding | -0. 094208  | 300  | 312  | 516   |
| MSTRG. 20618. 2 | coding    | 0. 355      | 0    | 1137 | 2405  |
| MSTRG. 20620. 2 | noncoding | -0. 028672  | 30   | 120  | 292   |

|                  |           |             |      |       |       |
|------------------|-----------|-------------|------|-------|-------|
| MSTRG. 20619. 4  | coding    | 0. 157      | 0    | 2112  | 3387  |
| MSTRG. 20621. 1  | coding    | 0. 059      | 5145 | 5793  | 8279  |
| MSTRG. 20628. 2  | coding    | 0. 485      | 0    | 1800  | 3761  |
| MSTRG. 20629. 1  | noncoding | -0. 032768  | 63   | 165   | 322   |
| MSTRG. 20629. 2  | noncoding | -0. 006144  | 159  | 213   | 368   |
| MSTRG. 20631. 2  | coding    | 0. 114      | 378  | 963   | 2692  |
| MSTRG. 20631. 3  | noncoding | -0. 0790528 | 1233 | 1491  | 5980  |
| MSTRG. 20634. 1  | coding    | 0. 147      | 0    | 2586  | 3512  |
| MSTRG. 20634. 2  | coding    | 0. 136      | 138  | 2517  | 2801  |
| MSTRG. 20634. 3  | coding    | 0. 129      | 804  | 1140  | 1420  |
| MSTRG. 20637. 3  | coding    | 0. 036      | 195  | 474   | 4275  |
| MSTRG. 20637. 5  | coding    | 0. 036      | 243  | 522   | 2330  |
| MSTRG. 20637. 4  | coding    | 0. 261      | 0    | 1044  | 2850  |
| MSTRG. 20638. 1  | coding    | 0. 538      | 0    | 258   | 1547  |
| MSTRG. 20642. 1  | coding    | 0. 142      | 432  | 747   | 1613  |
| MSTRG. 20654. 1  | noncoding | -0. 0065536 | 0    | 81    | 252   |
| MSTRG. 20654. 2  | coding    | 0. 042      | 8325 | 14001 | 14871 |
| MSTRG. 20654. 4  | noncoding | -0. 0262144 | 2130 | 2316  | 2471  |
| MSTRG. 20654. 3  | noncoding | -0. 016384  | 2253 | 2352  | 2508  |
| MSTRG. 20654. 5  | noncoding | -0. 08192   | 1887 | 1959  | 2114  |
| MSTRG. 20654. 12 | coding    | 0. 02       | 210  | 411   | 1238  |
| MSTRG. 20654. 8  | coding    | 0. 11       | 3990 | 4197  | 7290  |
| MSTRG. 20654. 10 | coding    | 0. 001      | 1824 | 2292  | 3026  |
| MSTRG. 20654. 11 | coding    | 0. 058      | 7107 | 10191 | 12817 |
| MSTRG. 20654. 9  | coding    | 0. 058      | 7050 | 10134 | 12761 |
| MSTRG. 20654. 6  | coding    | 0. 042      | 7392 | 13068 | 13939 |
| MSTRG. 20654. 7  | coding    | 0. 042      | 7755 | 13431 | 14302 |
| MSTRG. 20654. 13 | noncoding | -0. 012288  | 729  | 864   | 4094  |
| MSTRG. 20656. 1  | noncoding | -0. 0004096 | 3225 | 3318  | 8276  |
| MSTRG. 20657. 1  | noncoding | -0. 0299008 | 480  | 570   | 2255  |
| MSTRG. 20658. 1  | noncoding | -0. 0053248 | 720  | 912   | 1254  |
| MSTRG. 20654. 14 | coding    | 0. 006      | 1434 | 1626  | 3684  |
| MSTRG. 20660. 2  | coding    | 0. 117      | 99   | 1812  | 3786  |
| MSTRG. 20644. 1  | coding    | 0. 154      | 0    | 1869  | 2774  |
| MSTRG. 20644. 3  | coding    | 0. 099      | 147  | 1650  | 6915  |
| MSTRG. 20644. 6  | noncoding | -0. 0446464 | 4797 | 5238  | 10352 |
| MSTRG. 20646. 1  | coding    | 0. 315      | 417  | 1821  | 2133  |
| MSTRG. 20649. 2  | coding    | 0. 407      | 1737 | 4368  | 5244  |
| MSTRG. 20649. 3  | coding    | 0. 406      | 342  | 2967  | 3842  |
| MSTRG. 20662. 1  | noncoding | -0. 0897024 | 0    | 147   | 425   |
| MSTRG. 20662. 2  | noncoding | -0. 016384  | 288  | 369   | 873   |
| MSTRG. 20662. 3  | coding    | 0. 193      | 78   | 420   | 1069  |
| MSTRG. 20662. 4  | noncoding | -0. 0790528 | 204  | 546   | 1195  |
| MSTRG. 20662. 5  | noncoding | -0. 067584  | 0    | 510   | 1159  |
| MSTRG. 20662. 6  | noncoding | -0. 067584  | 0    | 603   | 1252  |
| MSTRG. 20664. 1  | coding    | 0. 343      | 0    | 1497  | 4391  |
| MSTRG. 20664. 2  | coding    | 0. 286      | 1242 | 2157  | 3915  |
| MSTRG. 20667. 2  | noncoding | -0. 055296  | 522  | 1128  | 1673  |
| MSTRG. 20668. 1  | coding    | 0. 223      | 249  | 705   | 1013  |
| MSTRG. 20669. 2  | coding    | 0. 366      | 4140 | 5007  | 5350  |
| MSTRG. 20670. 1  | noncoding | -0. 0151552 | 639  | 1101  | 10076 |
| MSTRG. 20672. 6  | coding    | 0. 453      | 1044 | 2370  | 2803  |
| MSTRG. 20672. 8  | coding    | 0. 404      | 2862 | 3714  | 4147  |
| MSTRG. 20674. 1  | coding    | 0. 076      | 1764 | 6399  | 11126 |

|                  |           |             |       |       |       |
|------------------|-----------|-------------|-------|-------|-------|
| MSTRG. 20674. 3  | coding    | 0. 082      | 1245  | 6381  | 10189 |
| MSTRG. 20674. 5  | coding    | 0. 084      | 1764  | 6537  | 7206  |
| MSTRG. 20674. 6  | noncoding | -0. 08192   | 162   | 273   | 2283  |
| MSTRG. 20678. 2  | coding    | 0. 103      | 3837  | 5436  | 7076  |
| MSTRG. 20678. 3  | noncoding | -0. 0626688 | 0     | 87    | 934   |
| MSTRG. 20678. 4  | coding    | 0. 099      | 3543  | 5154  | 7086  |
| MSTRG. 20679. 1  | coding    | 0. 052      | 222   | 429   | 1231  |
| MSTRG. 20677. 1  | noncoding | -0. 0004096 | 4356  | 4530  | 7969  |
| MSTRG. 20681. 1  | noncoding | -0. 049152  | 360   | 408   | 563   |
| MSTRG. 20682. 1  | noncoding | -0. 012288  | 36    | 147   | 485   |
| MSTRG. 20682. 2  | noncoding | -0. 0323584 | 36    | 162   | 507   |
| MSTRG. 20688. 2  | noncoding | -0. 0770048 | 0     | 177   | 3126  |
| MSTRG. 20705. 1  | coding    | 0. 349      | 33    | 525   | 821   |
| MSTRG. 20705. 2  | noncoding | -0. 1396736 | 15    | 480   | 710   |
| MSTRG. 20710. 3  | noncoding | -0. 0684032 | 63    | 285   | 4078  |
| MSTRG. 20710. 5  | noncoding | -0. 04096   | 0     | 654   | 10269 |
| MSTRG. 20711. 1  | noncoding | -0. 0442368 | 519   | 705   | 862   |
| MSTRG. 20713. 1  | noncoding | -0. 032768  | 1263  | 1371  | 1731  |
| MSTRG. 20708. 2  | coding    | 0. 157      | 0     | 651   | 2723  |
| MSTRG. 20709. 1  | noncoding | -0. 0147456 | 33    | 327   | 628   |
| MSTRG. 20714. 1  | coding    | 0. 473      | 624   | 1455  | 3158  |
| MSTRG. 20725. 3  | coding    | 0. 14       | 10689 | 10923 | 15327 |
| MSTRG. 20725. 5  | noncoding | -0. 0196608 | 1866  | 2022  | 2400  |
| MSTRG. 20725. 4  | coding    | 0. 082      | 399   | 1446  | 3766  |
| MSTRG. 20725. 6  | coding    | 0. 082      | 516   | 1563  | 3881  |
| MSTRG. 20725. 7  | noncoding | -0. 0278528 | 18    | 81    | 275   |
| MSTRG. 20725. 8  | coding    | 0. 082      | 564   | 1611  | 3930  |
| MSTRG. 20725. 9  | noncoding | -0. 0602112 | 1221  | 1344  | 3970  |
| MSTRG. 20725. 10 | noncoding | -0. 032768  | 4989  | 5073  | 9170  |
| MSTRG. 20725. 11 | coding    | 0. 082      | 3873  | 4920  | 7240  |
| MSTRG. 20725. 12 | noncoding | -0. 077824  | 2745  | 2781  | 4858  |
| MSTRG. 20725. 14 | noncoding | -0. 0602112 | 1116  | 1239  | 2826  |
| MSTRG. 20726. 1  | noncoding | -0. 0774144 | 2985  | 3039  | 5275  |
| MSTRG. 20727. 1  | noncoding | -0. 0741376 | 477   | 489   | 3102  |
| MSTRG. 20728. 1  | noncoding | -0. 036864  | 2955  | 3198  | 5172  |
| MSTRG. 20730. 12 | noncoding | -0. 004096  | 1173  | 1293  | 1449  |
| MSTRG. 20730. 6  | coding    | 0. 052      | 0     | 3405  | 3939  |
| MSTRG. 20730. 8  | coding    | 0. 058      | 0     | 4131  | 5034  |
| MSTRG. 20730. 11 | coding    | 0. 049      | 0     | 3354  | 5176  |
| MSTRG. 20730. 10 | coding    | 0. 055      | 0     | 4500  | 6718  |
| MSTRG. 20730. 7  | coding    | 0. 051      | 0     | 4539  | 6418  |
| MSTRG. 20730. 4  | coding    | 0. 05       | 0     | 4485  | 6336  |
| MSTRG. 20730. 5  | coding    | 0. 051      | 0     | 4509  | 6394  |
| MSTRG. 20730. 9  | coding    | 0. 054      | 0     | 3429  | 5314  |
| MSTRG. 20730. 13 | coding    | 0. 124      | 600   | 1551  | 3691  |
| MSTRG. 20730. 14 | coding    | 0. 117      | 579   | 1407  | 3178  |
| MSTRG. 20718. 1  | noncoding | -0. 12288   | 384   | 393   | 949   |
| MSTRG. 20720. 2  | noncoding | -0. 0745472 | 0     | 147   | 435   |
| MSTRG. 20734. 1  | noncoding | -0. 0004096 | 7620  | 7845  | 8159  |
| MSTRG. 20740. 1  | coding    | 0. 265      | 0     | 1593  | 2858  |
| MSTRG. 20742. 2  | coding    | 0. 125      | 348   | 1098  | 1536  |
| MSTRG. 20742. 3  | coding    | 0. 116      | 291   | 1134  | 1756  |
| MSTRG. 20742. 4  | coding    | 0. 102      | 54    | 861   | 1297  |
| MSTRG. 20743. 1  | coding    | 0. 106      | 120   | 1428  | 2182  |

|                  |           |             |       |       |       |
|------------------|-----------|-------------|-------|-------|-------|
| MSTRG. 20746. 1  | noncoding | -0. 065536  | 978   | 1056  | 2526  |
| MSTRG. 20737. 1  | noncoding | -0. 0217088 | 693   | 873   | 1859  |
| MSTRG. 20737. 2  | coding    | 0. 098      | 378   | 999   | 2578  |
| MSTRG. 20751. 2  | coding    | 0. 026      | 615   | 1170  | 1643  |
| MSTRG. 20753. 3  | coding    | 0. 188      | 0     | 2535  | 3306  |
| MSTRG. 20753. 4  | coding    | 0. 225      | 1560  | 2898  | 3667  |
| MSTRG. 20750. 3  | coding    | 0. 147      | 1191  | 3477  | 3983  |
| MSTRG. 20750. 1  | coding    | 0. 149      | 435   | 2730  | 3236  |
| MSTRG. 20758. 1  | coding    | 0. 183      | 90    | 1269  | 2198  |
| MSTRG. 20763. 10 | noncoding | -0. 0167936 | 0     | 96    | 729   |
| MSTRG. 20763. 8  | coding    | 0. 079      | 327   | 8433  | 8589  |
| MSTRG. 20763. 13 | coding    | 0. 096      | 558   | 6198  | 7956  |
| MSTRG. 20774. 1  | coding    | 0. 026      | 5136  | 5310  | 8406  |
| MSTRG. 20775. 4  | coding    | 0. 227      | 6     | 1695  | 2342  |
| MSTRG. 20775. 6  | coding    | 0. 212      | 6     | 1527  | 2267  |
| MSTRG. 20775. 7  | coding    | 0. 226      | 6     | 2610  | 11435 |
| MSTRG. 20775. 8  | coding    | 0. 212      | 6     | 1527  | 10311 |
| MSTRG. 20775. 9  | noncoding | -0. 0139264 | 3204  | 3297  | 3477  |
| MSTRG. 20776. 1  | coding    | 0. 01       | 2205  | 2337  | 6726  |
| MSTRG. 20776. 2  | coding    | 0. 01       | 2205  | 2337  | 6581  |
| MSTRG. 20777. 1  | noncoding | -0. 01024   | 3303  | 3456  | 7166  |
| MSTRG. 20778. 1  | noncoding | -0. 0139264 | 2241  | 2394  | 3043  |
| MSTRG. 20780. 1  | noncoding | -0. 02048   | 495   | 507   | 2250  |
| MSTRG. 20781. 1  | noncoding | -0. 06144   | 255   | 312   | 2716  |
| MSTRG. 20782. 1  | coding    | 0. 097      | 2838  | 3141  | 7794  |
| MSTRG. 20783. 1  | coding    | 0. 078      | 21    | 165   | 3945  |
| MSTRG. 20781. 2  | noncoding | -0. 016384  | 7137  | 7260  | 7510  |
| MSTRG. 20784. 1  | noncoding | -0. 0098304 | 5547  | 5688  | 9598  |
| MSTRG. 20785. 1  | noncoding | -0. 0012288 | 1890  | 2160  | 2678  |
| MSTRG. 20786. 1  | noncoding | -0. 008192  | 2046  | 2178  | 3725  |
| MSTRG. 20775. 10 | coding    | 0. 142      | 147   | 1233  | 25752 |
| MSTRG. 20787. 1  | coding    | 0. 079      | 5673  | 6147  | 7313  |
| MSTRG. 20787. 2  | coding    | 0. 079      | 10722 | 11196 | 18030 |
| MSTRG. 20792. 1  | noncoding | -0. 008192  | 6723  | 6897  | 12543 |
| MSTRG. 20793. 1  | noncoding | -0. 024576  | 3348  | 3531  | 16596 |
| MSTRG. 20794. 1  | coding    | 0. 045      | 666   | 891   | 4076  |
| MSTRG. 20800. 1  | coding    | 0. 098      | 1635  | 2940  | 3445  |
| MSTRG. 20800. 2  | noncoding | -0. 0339968 | 75    | 237   | 774   |
| MSTRG. 20801. 1  | noncoding | -0. 098304  | 756   | 768   | 921   |
| MSTRG. 20797. 1  | noncoding | -0. 0049152 | 288   | 477   | 632   |
| MSTRG. 20798. 4  | coding    | 0. 363      | 657   | 1710  | 2058  |
| MSTRG. 20819. 4  | coding    | 0. 21       | 0     | 8253  | 14172 |
| MSTRG. 20819. 8  | coding    | 0. 214      | 0     | 11532 | 11687 |
| MSTRG. 20822. 1  | noncoding | -0. 0299008 | 24    | 39    | 437   |
| MSTRG. 20816. 5  | coding    | 0. 341      | 192   | 1179  | 1894  |
| MSTRG. 20816. 3  | coding    | 0. 303      | 189   | 1296  | 2013  |
| MSTRG. 20816. 4  | coding    | 0. 345      | 354   | 1077  | 1792  |
| MSTRG. 20816. 2  | coding    | 0. 317      | 126   | 1254  | 1970  |
| MSTRG. 20823. 3  | coding    | 0. 461      | 2646  | 4812  | 6703  |
| MSTRG. 20823. 4  | coding    | 0. 459      | 297   | 2514  | 4405  |
| MSTRG. 20823. 2  | coding    | 0. 469      | 597   | 2904  | 4795  |
| MSTRG. 20823. 1  | coding    | 0. 359      | 36    | 5826  | 7715  |
| MSTRG. 20817. 2  | coding    | 0. 532      | 0     | 1770  | 1987  |
| MSTRG. 20817. 1  | coding    | 0. 505      | 0     | 1944  | 2175  |

|                 |           |             |       |       |       |
|-----------------|-----------|-------------|-------|-------|-------|
| MSTRG. 20828. 4 | coding    | 0. 356      | 597   | 2490  | 2645  |
| MSTRG. 20828. 5 | noncoding | -0. 028672  | 1029  | 1218  | 2916  |
| MSTRG. 20829. 1 | coding    | 0. 414      | 0     | 2247  | 2804  |
| MSTRG. 20829. 2 | coding    | 0. 461      | 297   | 2220  | 2777  |
| MSTRG. 20829. 5 | coding    | 0. 424      | 168   | 1656  | 2586  |
| MSTRG. 20830. 4 | coding    | 0. 204      | 117   | 4350  | 4619  |
| MSTRG. 20825. 3 | coding    | 0. 29       | 48    | 396   | 1082  |
| MSTRG. 20825. 4 | coding    | 0. 292      | 72    | 447   | 1133  |
| MSTRG. 20826. 2 | noncoding | -0. 0512    | 0     | 291   | 1744  |
| MSTRG. 20831. 1 | coding    | 0. 472      | 0     | 588   | 964   |
| MSTRG. 20832. 3 | coding    | 0. 371      | 684   | 1590  | 1790  |
| MSTRG. 20836. 2 | coding    | 0. 396      | 1755  | 8826  | 9878  |
| MSTRG. 20836. 3 | coding    | 0. 396      | 708   | 7779  | 8849  |
| MSTRG. 20836. 4 | coding    | 0. 399      | 795   | 8412  | 9462  |
| MSTRG. 20840. 1 | coding    | 0. 433      | 45    | 1224  | 4183  |
| MSTRG. 20845. 4 | coding    | 0. 289      | 57    | 5067  | 7832  |
| MSTRG. 20845. 7 | coding    | 0. 289      | 4992  | 10002 | 12765 |
| MSTRG. 20845. 6 | coding    | 0. 289      | 327   | 5337  | 8100  |
| MSTRG. 20845. 9 | noncoding | -0. 0016384 | 3390  | 3561  | 4199  |
| MSTRG. 20844. 2 | coding    | 0. 188      | 603   | 1929  | 2112  |
| MSTRG. 20850. 1 | coding    | 0. 078      | 612   | 1053  | 18344 |
| MSTRG. 20850. 3 | noncoding | -0. 008192  | 3282  | 3426  | 7520  |
| MSTRG. 20852. 4 | coding    | 0. 461      | 0     | 2667  | 4059  |
| MSTRG. 20854. 1 | noncoding | -0. 0974848 | 0     | 462   | 1013  |
| MSTRG. 20854. 2 | noncoding | -0. 0790528 | 81    | 474   | 1025  |
| MSTRG. 20866. 1 | noncoding | -0. 1024    | 75    | 150   | 303   |
| MSTRG. 20867. 2 | coding    | 0. 297      | 132   | 1602  | 1893  |
| MSTRG. 20873. 1 | coding    | 0. 462      | 0     | 1683  | 2075  |
| MSTRG. 20873. 2 | coding    | 0. 473      | 0     | 1641  | 2033  |
| MSTRG. 20873. 3 | coding    | 0. 507      | 42    | 1434  | 1827  |
| MSTRG. 20873. 4 | coding    | 0. 51       | 105   | 1476  | 1869  |
| MSTRG. 20875. 3 | noncoding | -0. 0741376 | 4368  | 4824  | 5173  |
| MSTRG. 20875. 2 | coding    | 0. 425      | 501   | 5043  | 7772  |
| MSTRG. 20876. 1 | noncoding | -0. 0483328 | 2691  | 2883  | 6541  |
| MSTRG. 20877. 1 | noncoding | -0. 0192512 | 204   | 495   | 2282  |
| MSTRG. 20878. 1 | noncoding | -0. 0397312 | 11229 | 11499 | 15239 |
| MSTRG. 20872. 1 | noncoding | -0. 028672  | 60    | 99    | 488   |
| MSTRG. 20882. 1 | coding    | 0. 13       | 1560  | 2883  | 8400  |
| MSTRG. 20883. 1 | noncoding | -0. 02048   | 186   | 420   | 1278  |
| MSTRG. 20884. 2 | coding    | 0. 271      | 12    | 2091  | 2745  |
| MSTRG. 20884. 3 | coding    | 0. 39       | 0     | 2973  | 3627  |
| MSTRG. 20884. 4 | coding    | 0. 441      | 0     | 1419  | 1958  |
| MSTRG. 20891. 1 | noncoding | -0. 0233472 | 1851  | 2232  | 21809 |
| MSTRG. 20891. 2 | noncoding | -0. 0241664 | 3162  | 3465  | 5664  |
| MSTRG. 20891. 3 | noncoding | -0. 0241664 | 3162  | 3465  | 4270  |
| MSTRG. 20892. 1 | noncoding | -0. 0045056 | 3903  | 4155  | 5183  |
| MSTRG. 20895. 1 | coding    | 0. 225      | 159   | 2031  | 4557  |
| MSTRG. 20900. 4 | coding    | 0. 455      | 123   | 1254  | 1410  |
| MSTRG. 20900. 3 | coding    | 0. 455      | 3786  | 4920  | 5075  |
| MSTRG. 20912. 2 | coding    | 0. 228      | 447   | 993   | 4130  |
| MSTRG. 20913. 3 | coding    | 0. 569      | 1473  | 7275  | 10947 |
| MSTRG. 20913. 4 | coding    | 0. 581      | 0     | 5673  | 5915  |
| MSTRG. 20913. 5 | coding    | 0. 56       | 405   | 6279  | 9799  |
| MSTRG. 20915. 1 | noncoding | -0. 083968  | 0     | 117   | 412   |

|                  |           |             |      |      |      |
|------------------|-----------|-------------|------|------|------|
| MSTRG. 20919. 1  | coding    | 0. 419      | 0    | 2247 | 2411 |
| MSTRG. 20914. 1  | noncoding | -0. 0028672 | 285  | 393  | 712  |
| MSTRG. 20914. 2  | noncoding | -0. 0753664 | 0    | 237  | 499  |
| MSTRG. 20914. 3  | noncoding | -0. 0589824 | 0    | 213  | 633  |
| MSTRG. 20923. 1  | noncoding | -0. 0462848 | 0    | 99   | 351  |
| MSTRG. 20921. 1  | noncoding | -0. 0700416 | 15   | 255  | 409  |
| MSTRG. 20921. 2  | noncoding | -0. 038912  | 15   | 171  | 800  |
| MSTRG. 20932. 2  | coding    | 0. 279      | 123  | 861  | 1437 |
| MSTRG. 20934. 1  | noncoding | -0. 08192   | 138  | 393  | 773  |
| MSTRG. 20930. 1  | coding    | 0. 403      | 0    | 1413 | 1649 |
| MSTRG. 20943. 1  | noncoding | -0. 0585728 | 756  | 951  | 1478 |
| MSTRG. 20944. 1  | noncoding | -0. 0897024 | 0    | 282  | 1369 |
| MSTRG. 20940. 1  | noncoding | -0. 0651264 | 0    | 240  | 510  |
| MSTRG. 20949. 2  | coding    | 0. 509      | 0    | 1764 | 2362 |
| MSTRG. 20951. 1  | coding    | 0. 418      | 0    | 996  | 2455 |
| MSTRG. 20952. 2  | noncoding | -0. 0565248 | 0    | 1239 | 2037 |
| MSTRG. 20953. 4  | coding    | 0. 309      | 87   | 759  | 6396 |
| MSTRG. 20953. 2  | coding    | 0. 3        | 474  | 1026 | 2185 |
| MSTRG. 20953. 5  | noncoding | -0. 1007616 | 441  | 729  | 5355 |
| MSTRG. 20950. 2  | coding    | 0. 599      | 0    | 2370 | 4405 |
| MSTRG. 20955. 3  | coding    | 0. 415      | 237  | 1623 | 1805 |
| MSTRG. 20955. 5  | coding    | 0. 401      | 456  | 2112 | 2296 |
| MSTRG. 20955. 4  | coding    | 0. 403      | 207  | 1866 | 2050 |
| MSTRG. 20955. 1  | coding    | 0. 424      | 609  | 2118 | 2302 |
| MSTRG. 20957. 1  | noncoding | -0. 0004096 | 648  | 792  | 2853 |
| MSTRG. 20959. 1  | noncoding | -0. 606208  | 30   | 36   | 231  |
| MSTRG. 20967. 3  | coding    | 0. 222      | 84   | 1974 | 5627 |
| MSTRG. 20967. 7  | coding    | 0. 295      | 63   | 1740 | 5391 |
| MSTRG. 20967. 9  | coding    | 0. 341      | 84   | 4662 | 5234 |
| MSTRG. 20967. 10 | coding    | 0. 371      | 84   | 4104 | 4677 |
| MSTRG. 20967. 8  | coding    | 0. 412      | 63   | 3870 | 4443 |
| MSTRG. 20967. 11 | coding    | 0. 484      | 2112 | 4398 | 4969 |
| MSTRG. 20967. 13 | coding    | 0. 484      | 510  | 2796 | 3371 |
| MSTRG. 20967. 14 | coding    | 0. 484      | 66   | 2352 | 2924 |
| MSTRG. 20969. 2  | noncoding | -0. 0651264 | 27   | 249  | 419  |
| MSTRG. 20963. 4  | coding    | 0. 494      | 1440 | 3909 | 4066 |
| MSTRG. 20963. 5  | coding    | 0. 496      | 1440 | 3897 | 4054 |
| MSTRG. 20963. 8  | coding    | 0. 503      | 786  | 3699 | 3856 |
| MSTRG. 20963. 6  | coding    | 0. 502      | 147  | 3072 | 3227 |
| MSTRG. 20975. 2  | coding    | 0. 251      | 189  | 618  | 818  |
| MSTRG. 20979. 2  | coding    | 0. 534      | 0    | 2007 | 3008 |
| MSTRG. 20981. 2  | coding    | 0. 54       | 375  | 2151 | 2471 |
| MSTRG. 20977. 2  | coding    | 0. 579      | 33   | 846  | 3508 |
| MSTRG. 20978. 1  | coding    | 0. 454      | 0    | 1518 | 1717 |
| MSTRG. 20978. 3  | coding    | 0. 442      | 24   | 1377 | 5329 |
| MSTRG. 20986. 2  | coding    | 0. 329      | 18   | 2436 | 4056 |
| MSTRG. 20986. 5  | coding    | 0. 457      | 0    | 1680 | 2229 |
| MSTRG. 20986. 1  | coding    | 0. 348      | 60   | 2400 | 4020 |
| MSTRG. 20986. 3  | coding    | 0. 347      | 99   | 2445 | 4064 |
| MSTRG. 20986. 7  | coding    | 0. 33       | 60   | 2472 | 3822 |
| MSTRG. 20986. 8  | coding    | 0. 458      | 60   | 1800 | 2690 |
| MSTRG. 20989. 1  | noncoding | -0. 1097728 | 465  | 1278 | 1546 |
| MSTRG. 20990. 1  | noncoding | -0. 1220608 | 0    | 372  | 1101 |
| MSTRG. 20990. 2  | noncoding | -0. 1417216 | 612  | 1044 | 1199 |

|                 |           |             |      |      |       |
|-----------------|-----------|-------------|------|------|-------|
| MSTRG. 20994. 3 | coding    | 0. 385      | 0    | 6081 | 7406  |
| MSTRG. 20999. 2 | coding    | 0. 187      | 0    | 7965 | 12702 |
| MSTRG. 20999. 3 | coding    | 0. 189      | 2442 | 9222 | 13652 |
| MSTRG. 21000. 1 | noncoding | -0. 0376832 | 609  | 801  | 1168  |
| MSTRG. 21002. 1 | noncoding | -0. 0303104 | 1263 | 1986 | 5102  |
| MSTRG. 21011. 4 | coding    | 0. 322      | 0    | 2415 | 2634  |
| MSTRG. 21017. 1 | noncoding | -0. 0176128 | 111  | 291  | 446   |
| MSTRG. 21018. 1 | coding    | 0. 449      | 0    | 1560 | 3721  |
| MSTRG. 21018. 2 | coding    | 0. 453      | 0    | 1557 | 3718  |
| MSTRG. 21018. 3 | coding    | 0. 524      | 0    | 990  | 1144  |
| MSTRG. 21024. 5 | coding    | 0. 22       | 60   | 5007 | 9524  |
| MSTRG. 21024. 6 | coding    | 0. 223      | 747  | 5274 | 9762  |
| MSTRG. 21024. 7 | coding    | 0. 218      | 864  | 5853 | 10341 |
| MSTRG. 21022. 1 | noncoding | -0. 0004096 | 0    | 0    | 350   |
| MSTRG. 21027. 4 | coding    | 0. 132      | 0    | 1785 | 2335  |
| MSTRG. 21027. 6 | coding    | 0. 137      | 0    | 1827 | 2375  |
| MSTRG. 21027. 5 | coding    | 0. 148      | 12   | 1539 | 2088  |
| MSTRG. 21027. 8 | coding    | 0. 154      | 0    | 1422 | 1972  |
| MSTRG. 21037. 2 | coding    | 0. 242      | 468  | 936  | 2010  |
| MSTRG. 21038. 2 | coding    | 0. 083      | 4722 | 5790 | 6349  |
| MSTRG. 21038. 5 | noncoding | -0. 0684032 | 249  | 288  | 1040  |
| MSTRG. 21038. 6 | noncoding | -0. 014336  | 4719 | 4863 | 6234  |
| MSTRG. 21039. 2 | coding    | 0. 18       | 822  | 1530 | 2754  |
| MSTRG. 21048. 3 | coding    | 0. 103      | 354  | 3585 | 11134 |
| MSTRG. 21048. 5 | coding    | 0. 103      | 645  | 3876 | 4203  |
| MSTRG. 21049. 2 | noncoding | -0. 0516096 | 8532 | 8709 | 10145 |
| MSTRG. 21061. 1 | coding    | 0. 159      | 0    | 3336 | 8598  |
| MSTRG. 21061. 2 | coding    | 0. 094      | 0    | 2520 | 11348 |
| MSTRG. 21062. 1 | coding    | 0. 075      | 0    | 480  | 931   |
| MSTRG. 21061. 3 | coding    | 0. 158      | 948  | 1746 | 2179  |
| MSTRG. 21066. 1 | coding    | 0. 2        | 0    | 636  | 1181  |
| MSTRG. 21068. 3 | coding    | 0. 196      | 0    | 1719 | 2915  |
| MSTRG. 21074. 1 | coding    | 0. 048      | 3483 | 4218 | 5671  |
| MSTRG. 21076. 4 | coding    | 0. 153      | 0    | 525  | 808   |
| MSTRG. 21079. 1 | noncoding | -0. 026624  | 975  | 1089 | 1244  |
| MSTRG. 21080. 3 | noncoding | -0. 110592  | 6279 | 6384 | 7557  |
| MSTRG. 21080. 4 | coding    | 0. 135      | 129  | 225  | 887   |
| MSTRG. 21082. 1 | noncoding | -0. 0507904 | 636  | 639  | 1104  |
| MSTRG. 21083. 1 | noncoding | -0. 0364544 | 3219 | 3360 | 3955  |
| MSTRG. 21086. 1 | noncoding | -0. 1134592 | 0    | 141  | 772   |
| MSTRG. 21087. 3 | coding    | 0. 209      | 360  | 1347 | 4825  |
| MSTRG. 21090. 1 | coding    | 0. 012      | 810  | 2805 | 2959  |
| MSTRG. 21089. 3 | noncoding | -0. 0548864 | 2772 | 3258 | 3415  |
| MSTRG. 21096. 4 | coding    | 0. 075      | 846  | 1545 | 2224  |
| MSTRG. 21092. 2 | coding    | 0. 246      | 1695 | 2484 | 3581  |
| MSTRG. 21093. 3 | coding    | 0. 093      | 300  | 3318 | 3807  |
| MSTRG. 21104. 3 | coding    | 0. 157      | 807  | 2079 | 2923  |
| MSTRG. 21104. 4 | coding    | 0. 157      | 771  | 2043 | 2543  |
| MSTRG. 21105. 1 | noncoding | -0. 126976  | 2088 | 2145 | 2803  |
| MSTRG. 21106. 5 | noncoding | -0. 104448  | 156  | 891  | 4608  |
| MSTRG. 21106. 7 | coding    | 0. 17       | 156  | 1815 | 3624  |
| MSTRG. 21106. 6 | coding    | 0. 164      | 156  | 1860 | 3686  |
| MSTRG. 21106. 2 | noncoding | -0. 104448  | 156  | 891  | 4827  |
| MSTRG. 21106. 4 | noncoding | -0. 104448  | 156  | 891  | 4936  |



|                |           |            |      |      |      |
|----------------|-----------|------------|------|------|------|
| MSTRG.21106.8  | coding    | 0.13       | 465  | 1596 | 3405 |
| MSTRG.21106.9  | coding    | 0.13       | 96   | 1227 | 3035 |
| MSTRG.21106.10 | coding    | 0.122      | 516  | 1692 | 3501 |
| MSTRG.21106.11 | coding    | 0.126      | 456  | 1566 | 3216 |
| MSTRG.21101.3  | coding    | 0.115      | 264  | 1002 | 4866 |
| MSTRG.21098.1  | noncoding | -0.0823296 | 9123 | 9555 | 9710 |
| MSTRG.21102.2  | coding    | 0.177      | 0    | 810  | 1101 |
| MSTRG.21107.2  | coding    | 0.218      | 861  | 1830 | 7948 |
| MSTRG.21107.3  | coding    | 0.132      | 240  | 2205 | 2574 |
| MSTRG.21108.1  | noncoding | -0.0147456 | 4227 | 4338 | 7813 |
| MSTRG.21109.1  | noncoding | -0.032768  | 1026 | 1116 | 3910 |
| MSTRG.21107.4  | coding    | 0.218      | 336  | 1305 | 1673 |
| MSTRG.21111.2  | coding    | 0.319      | 51   | 3039 | 4669 |
| MSTRG.21112.1  | coding    | 0.26       | 375  | 1269 | 7031 |
| MSTRG.21112.2  | noncoding | -0.0249856 | 5022 | 5502 | 6343 |
| MSTRG.21115.1  | noncoding | -0.1236992 | 0    | 636  | 2035 |
| MSTRG.21117.1  | noncoding | -0.131072  | 156  | 195  | 350  |
| MSTRG.21120.1  | noncoding | -0.135168  | 240  | 285  | 457  |
| MSTRG.21126.2  | coding    | 0.235      | 303  | 2352 | 4508 |
| MSTRG.21123.1  | noncoding | -0.0331776 | 225  | 507  | 769  |
| MSTRG.21130.3  | coding    | 0.145      | 939  | 1494 | 4651 |
| MSTRG.21127.1  | coding    | 0.302      | 0    | 5226 | 8099 |
| MSTRG.21127.2  | coding    | 0.3        | 0    | 5184 | 8057 |
| MSTRG.21128.1  | noncoding | -0.1482752 | 81   | 90   | 322  |
| MSTRG.21146.3  | coding    | 0.379      | 36   | 963  | 2031 |
| MSTRG.21147.1  | noncoding | -0.008192  | 0    | 129  | 688  |
| MSTRG.21146.4  | coding    | 0.396      | 501  | 1353 | 1575 |
| MSTRG.21146.6  | coding    | 0.396      | 471  | 1323 | 1545 |
| MSTRG.21146.5  | coding    | 0.363      | 6915 | 7944 | 8164 |
| MSTRG.21146.7  | coding    | 0.369      | 888  | 1950 | 2172 |
| MSTRG.21146.8  | coding    | 0.406      | 120  | 786  | 956  |
| MSTRG.21146.9  | noncoding | -0.053248  | 3513 | 3612 | 4099 |
| MSTRG.21146.10 | noncoding | -0.0192512 | 759  | 930  | 7677 |
| MSTRG.21146.11 | noncoding | -0.0483328 | 0    | 180  | 9405 |
| MSTRG.21146.12 | noncoding | -0.1032192 | 0    | 369  | 1461 |
| MSTRG.21148.10 | coding    | 0.131      | 0    | 3201 | 3725 |
| MSTRG.21148.12 | coding    | 0.134      | 0    | 3252 | 3778 |
| MSTRG.21148.6  | coding    | 0.117      | 132  | 3339 | 3864 |
| MSTRG.21148.8  | coding    | 0.106      | 261  | 3318 | 3844 |
| MSTRG.21148.9  | coding    | 0.121      | 132  | 3489 | 4014 |
| MSTRG.21134.1  | coding    | 0.309      | 66   | 993  | 1525 |
| MSTRG.21151.1  | noncoding | -0.0466944 | 2268 | 2658 | 3100 |
| MSTRG.21152.1  | coding    | 0.121      | 0    | 2700 | 5069 |
| MSTRG.21153.1  | coding    | 0.304      | 0    | 2832 | 6740 |
| MSTRG.21154.1  | coding    | 0.063      | 186  | 951  | 3892 |
| MSTRG.21154.2  | coding    | 0.09       | 138  | 573  | 761  |
| MSTRG.21155.1  | noncoding | -0.0372736 | 108  | 240  | 786  |
| MSTRG.21156.2  | coding    | 0.115      | 429  | 1080 | 2069 |
| MSTRG.21154.3  | coding    | 0.158      | 0    | 345  | 1305 |
| MSTRG.21154.4  | coding    | 0.075      | 1665 | 3306 | 7780 |
| MSTRG.21159.3  | coding    | 0.068      | 717  | 1473 | 3241 |
| MSTRG.21159.4  | noncoding | -0.09216   | 201  | 633  | 3450 |
| MSTRG.21159.5  | noncoding | -0.0876544 | 198  | 816  | 4963 |
| MSTRG.21159.6  | noncoding | -0.09216   | 201  | 633  | 2673 |

|                 |           |             |      |      |       |
|-----------------|-----------|-------------|------|------|-------|
| MSTRG. 21159. 7 | noncoding | -0. 0376832 | 54   | 126  | 2474  |
| MSTRG. 21162. 6 | coding    | 0. 083      | 474  | 1704 | 3027  |
| MSTRG. 21162. 7 | coding    | 0. 102      | 612  | 2148 | 3471  |
| MSTRG. 21163. 1 | noncoding | -0. 1241088 | 0    | 141  | 778   |
| MSTRG. 21163. 2 | noncoding | -0. 053248  | 267  | 357  | 1878  |
| MSTRG. 21173. 1 | coding    | 0. 116      | 0    | 9723 | 17106 |
| MSTRG. 21169. 1 | noncoding | -0. 032768  | 12   | 117  | 1219  |
| MSTRG. 21176. 1 | noncoding | -0. 04096   | 0    | 102  | 451   |
| MSTRG. 21176. 2 | noncoding | -0. 0724992 | 0    | 78   | 410   |
| MSTRG. 21179. 3 | coding    | 0. 154      | 153  | 9300 | 10168 |
| MSTRG. 21179. 2 | coding    | 0. 154      | 165  | 9312 | 10181 |
| MSTRG. 21179. 5 | coding    | 0. 154      | 441  | 9588 | 10444 |
| MSTRG. 21179. 6 | coding    | 0. 154      | 147  | 9294 | 10130 |
| MSTRG. 21181. 2 | coding    | 0. 396      | 381  | 3993 | 11119 |
| MSTRG. 21198. 1 | coding    | 0. 254      | 0    | 1371 | 1935  |
| MSTRG. 21198. 2 | coding    | 0. 211      | 648  | 1239 | 3647  |
| MSTRG. 21198. 3 | coding    | 0. 275      | 0    | 1167 | 3571  |
| MSTRG. 21212. 1 | coding    | 0. 094      | 195  | 2319 | 4467  |
| MSTRG. 21212. 2 | coding    | 0. 085      | 195  | 1206 | 3428  |
| MSTRG. 21213. 2 | coding    | 0. 219      | 1881 | 2850 | 3003  |
| MSTRG. 21216. 2 | noncoding | -0. 016384  | 108  | 231  | 4481  |
| MSTRG. 21218. 2 | coding    | 0. 132      | 0    | 615  | 1101  |
| MSTRG. 21218. 3 | noncoding | -0. 0720896 | 537  | 720  | 873   |
| MSTRG. 21220. 3 | coding    | 0. 134      | 0    | 774  | 1917  |
| MSTRG. 21220. 4 | noncoding | -0. 045056  | 84   | 327  | 3431  |
| MSTRG. 21224. 1 | noncoding | -0. 02048   | 126  | 192  | 748   |
| MSTRG. 21235. 3 | coding    | 0. 338      | 402  | 2490 | 2921  |
| MSTRG. 21234. 1 | noncoding | -0. 045056  | 111  | 117  | 311   |
| MSTRG. 21244. 1 | noncoding | -0. 012288  | 99   | 303  | 674   |
| MSTRG. 21248. 2 | coding    | 0. 26       | 51   | 633  | 900   |
| MSTRG. 21249. 1 | noncoding | -0. 0495616 | 3879 | 4227 | 4384  |
| MSTRG. 21250. 2 | coding    | 0. 208      | 0    | 939  | 2594  |
| MSTRG. 21251. 1 | noncoding | -0. 0475136 | 150  | 462  | 813   |
| MSTRG. 21251. 2 | noncoding | -0. 0110592 | 42   | 957  | 1121  |
| MSTRG. 21252. 1 | noncoding | -0. 0086016 | 1407 | 2556 | 2756  |
| MSTRG. 21252. 2 | noncoding | -0. 0278528 | 1758 | 1917 | 3717  |
| MSTRG. 21254. 1 | noncoding | -0. 0249856 | 1299 | 1497 | 1821  |
| MSTRG. 21256. 5 | coding    | 0. 265      | 0    | 165  | 3651  |
| MSTRG. 21256. 6 | noncoding | -0. 0004096 | 186  | 303  | 1274  |
| MSTRG. 21257. 1 | noncoding | -0. 008192  | 75   | 141  | 603   |
| MSTRG. 21260. 1 | coding    | 0. 235      | 1110 | 1335 | 2338  |
| MSTRG. 21262. 1 | noncoding | -0. 004096  | 189  | 249  | 928   |
| MSTRG. 21268. 1 | noncoding | -0. 004096  | 891  | 1008 | 1621  |
| MSTRG. 21269. 1 | coding    | 0. 236      | 0    | 4095 | 5929  |
| MSTRG. 21269. 2 | noncoding | -0. 0540672 | 573  | 978  | 1443  |
| MSTRG. 21271. 2 | coding    | 0. 296      | 0    | 1980 | 5184  |
| MSTRG. 21272. 1 | noncoding | -0. 06144   | 363  | 480  | 852   |
| MSTRG. 21278. 2 | coding    | 0. 254      | 408  | 954  | 3650  |
| MSTRG. 21301. 3 | coding    | 0. 34       | 3    | 2571 | 4695  |
| MSTRG. 21302. 1 | noncoding | -0. 0360448 | 3972 | 4131 | 6382  |
| MSTRG. 21308. 1 | coding    | 0. 225      | 0    | 1614 | 4842  |
| MSTRG. 21309. 2 | coding    | 0. 276      | 294  | 3855 | 4856  |
| MSTRG. 21310. 3 | coding    | 0. 388      | 543  | 2331 | 2598  |
| MSTRG. 21315. 2 | coding    | 0. 413      | 132  | 4320 | 7013  |

|                 |           |            |       |       |       |
|-----------------|-----------|------------|-------|-------|-------|
| MSTRG. 21316.1  | noncoding | -0.012288  | 600   | 696   | 2625  |
| MSTRG. 21317.1  | noncoding | -0.073728  | 126   | 204   | 627   |
| MSTRG. 21318.1  | noncoding | -0.065536  | 1338  | 1392  | 1564  |
| MSTRG. 21315.4  | noncoding | -0.1880064 | 0     | 321   | 1746  |
| MSTRG. 21314.1  | coding    | 0.48       | 228   | 1350  | 1506  |
| MSTRG. 21319.1  | coding    | 0.457      | 297   | 3060  | 3238  |
| MSTRG. 21323.1  | coding    | 0.564      | 0     | 5847  | 8362  |
| MSTRG. 21323.5  | coding    | 0.665      | 0     | 4758  | 7386  |
| MSTRG. 21323.3  | coding    | 0.652      | 0     | 4986  | 7616  |
| MSTRG. 21323.8  | coding    | 0.605      | 0     | 5328  | 5789  |
| MSTRG. 21323.7  | coding    | 0.586      | 0     | 5571  | 5727  |
| MSTRG. 21323.9  | coding    | 0.596      | 0     | 5526  | 5979  |
| MSTRG. 21321.1  | coding    | 0.555      | 0     | 4329  | 5069  |
| MSTRG. 21321.2  | coding    | 0.587      | 0     | 4044  | 4784  |
| MSTRG. 21321.3  | coding    | 0.589      | 120   | 4068  | 4234  |
| MSTRG. 21324.2  | coding    | 0.523      | 0     | 2223  | 4329  |
| MSTRG. 21324.3  | coding    | 0.458      | 0     | 2547  | 2866  |
| MSTRG. 21326.1  | noncoding | -0.0303104 | 732   | 1491  | 3755  |
| MSTRG. 21327.3  | coding    | 0.424      | 648   | 1869  | 2647  |
| MSTRG. 21327.6  | coding    | 0.425      | 903   | 2085  | 2864  |
| MSTRG. 21327.8  | coding    | 0.432      | 165   | 735   | 2066  |
| MSTRG. 21330.2  | coding    | 0.176      | 0     | 465   | 619   |
| MSTRG. 21333.4  | coding    | 0.363      | 0     | 1851  | 2019  |
| MSTRG. 21334.5  | coding    | 0.289      | 0     | 4809  | 6392  |
| MSTRG. 21334.6  | coding    | 0.284      | 0     | 5016  | 6599  |
| MSTRG. 21334.7  | coding    | 0.289      | 0     | 4878  | 6460  |
| MSTRG. 21334.8  | coding    | 0.285      | 303   | 4893  | 6477  |
| MSTRG. 21334.9  | coding    | 0.292      | 588   | 5037  | 6621  |
| MSTRG. 21334.10 | coding    | 0.287      | 3111  | 7431  | 8186  |
| MSTRG. 21335.1  | noncoding | -0.016384  | 5385  | 5487  | 8337  |
| MSTRG. 21336.1  | noncoding | -0.0835584 | 0     | 279   | 4465  |
| MSTRG. 21336.2  | noncoding | -0.0643072 | 1377  | 1614  | 4287  |
| MSTRG. 21336.3  | noncoding | -0.0643072 | 1536  | 1773  | 3898  |
| MSTRG. 21338.4  | coding    | 0.38       | 14076 | 14985 | 18924 |
| MSTRG. 21338.6  | coding    | 0.376      | 405   | 2076  | 5771  |
| MSTRG. 21338.7  | coding    | 0.428      | 87    | 2772  | 6460  |
| MSTRG. 21338.9  | noncoding | -0.0241664 | 1107  | 1293  | 1446  |
| MSTRG. 21338.10 | noncoding | -0.0536576 | 1248  | 1569  | 2120  |
| MSTRG. 21338.13 | coding    | 0.525      | 0     | 1644  | 5147  |
| MSTRG. 21338.12 | coding    | 0.503      | 0     | 1725  | 2067  |
| MSTRG. 21342.1  | noncoding | -0.0479232 | 234   | 600   | 2531  |
| MSTRG. 21343.3  | coding    | 0.242      | 339   | 846   | 1203  |
| MSTRG. 21348.4  | coding    | 0.43       | 222   | 5352  | 5507  |
| MSTRG. 21348.1  | coding    | 0.38       | 1596  | 7449  | 7606  |
| MSTRG. 21348.2  | coding    | 0.381      | 1596  | 7452  | 7609  |
| MSTRG. 21349.1  | coding    | 0.534      | 465   | 1530  | 2740  |
| MSTRG. 21351.1  | noncoding | -0.0004096 | 141   | 282   | 436   |
| MSTRG. 21345.1  | coding    | 0.181      | 0     | 267   | 3293  |
| MSTRG. 21371.3  | coding    | 0.577      | 0     | 2982  | 3817  |
| MSTRG. 21371.5  | coding    | 0.632      | 1977  | 3471  | 4187  |
| MSTRG. 21371.4  | coding    | 0.521      | 90    | 5124  | 10724 |
| MSTRG. 21371.6  | coding    | 0.406      | 5904  | 8307  | 9004  |
| MSTRG. 21371.7  | coding    | 0.51       | 0     | 1527  | 4031  |
| MSTRG. 21371.9  | coding    | 0.522      | 0     | 4572  | 10632 |

|                  |           |             |      |       |       |
|------------------|-----------|-------------|------|-------|-------|
| MSTRG. 21371. 10 | coding    | 0. 521      | 1596 | 6735  | 12793 |
| MSTRG. 21371. 11 | coding    | 0. 523      | 1815 | 6939  | 12995 |
| MSTRG. 21371. 13 | coding    | 0. 522      | 630  | 5745  | 11745 |
| MSTRG. 21371. 12 | coding    | 0. 522      | 1881 | 6996  | 12997 |
| MSTRG. 21371. 15 | coding    | 0. 523      | 78   | 5097  | 10983 |
| MSTRG. 21371. 16 | coding    | 0. 523      | 639  | 5763  | 11651 |
| MSTRG. 21371. 17 | coding    | 0. 507      | 210  | 4941  | 10706 |
| MSTRG. 21371. 18 | coding    | 0. 522      | 1695 | 6810  | 9680  |
| MSTRG. 21372. 1  | noncoding | -0. 0217088 | 7065 | 9243  | 9582  |
| MSTRG. 21373. 1  | noncoding | -0. 0790528 | 468  | 708   | 863   |
| MSTRG. 21372. 2  | noncoding | -0. 01024   | 99   | 4416  | 5892  |
| MSTRG. 21356. 1  | coding    | 0. 646      | 54   | 1002  | 1251  |
| MSTRG. 21359. 1  | noncoding | -0. 034816  | 1566 | 2085  | 2841  |
| MSTRG. 21361. 1  | coding    | 0. 344      | 0    | 699   | 3362  |
| MSTRG. 21362. 1  | noncoding | -0. 004096  | 1455 | 1599  | 1752  |
| MSTRG. 21363. 1  | coding    | 0. 196      | 414  | 828   | 1968  |
| MSTRG. 21368. 2  | coding    | 0. 162      | 873  | 1776  | 3197  |
| MSTRG. 21368. 3  | coding    | 0. 145      | 1452 | 2361  | 3783  |
| MSTRG. 21369. 1  | noncoding | -0. 04096   | 633  | 744   | 1755  |
| MSTRG. 21377. 1  | noncoding | -0. 036864  | 0    | 21    | 238   |
| MSTRG. 21375. 1  | noncoding | -0. 0139264 | 243  | 258   | 420   |
| MSTRG. 21384. 1  | noncoding | -0. 126976  | 267  | 276   | 1669  |
| MSTRG. 21385. 5  | noncoding | -0. 0004096 | 3405 | 3528  | 4682  |
| MSTRG. 21385. 4  | coding    | 0. 047      | 168  | 1179  | 2042  |
| MSTRG. 21385. 7  | noncoding | -0. 0004096 | 9519 | 9642  | 9977  |
| MSTRG. 21385. 8  | noncoding | -0. 192512  | 1311 | 1347  | 1648  |
| MSTRG. 21385. 9  | coding    | 0. 062      | 0    | 990   | 4380  |
| MSTRG. 21385. 10 | noncoding | -0. 0425984 | 0    | 78    | 847   |
| MSTRG. 21395. 3  | coding    | 0. 136      | 0    | 507   | 983   |
| MSTRG. 21396. 3  | coding    | 0. 39       | 87   | 2316  | 5041  |
| MSTRG. 21396. 4  | coding    | 0. 346      | 780  | 3567  | 3721  |
| MSTRG. 21406. 1  | noncoding | -0. 0790528 | 3570 | 4857  | 5012  |
| MSTRG. 21406. 2  | noncoding | -0. 0815104 | 1215 | 2271  | 2428  |
| MSTRG. 21400. 1  | noncoding | -0. 077824  | 405  | 447   | 817   |
| MSTRG. 21402. 1  | noncoding | -0. 004096  | 393  | 624   | 780   |
| MSTRG. 21403. 1  | noncoding | -0. 03072   | 708  | 741   | 989   |
| MSTRG. 21414. 1  | noncoding | -0. 02048   | 600  | 633   | 966   |
| MSTRG. 21415. 1  | noncoding | -0. 0339968 | 2478 | 2655  | 10457 |
| MSTRG. 21416. 1  | noncoding | -0. 0090112 | 201  | 378   | 3776  |
| MSTRG. 21433. 1  | coding    | 0. 164      | 0    | 3054  | 7479  |
| MSTRG. 21433. 4  | coding    | 0. 139      | 291  | 3216  | 5227  |
| MSTRG. 21433. 3  | coding    | 0. 144      | 192  | 3144  | 7569  |
| MSTRG. 21433. 5  | coding    | 0. 166      | 0    | 3042  | 12169 |
| MSTRG. 21433. 6  | coding    | 0. 14       | 645  | 3789  | 24139 |
| MSTRG. 21433. 7  | coding    | 0. 139      | 804  | 3729  | 5719  |
| MSTRG. 21433. 8  | coding    | 0. 136      | 2487 | 5571  | 7582  |
| MSTRG. 21433. 9  | coding    | 0. 048      | 4731 | 5484  | 17628 |
| MSTRG. 21434. 1  | coding    | 0. 142      | 15   | 471   | 917   |
| MSTRG. 21433. 10 | coding    | 0. 142      | 4215 | 7164  | 9120  |
| MSTRG. 21433. 11 | coding    | 0. 052      | 9639 | 10635 | 25980 |
| MSTRG. 21433. 13 | coding    | 0. 143      | 138  | 3099  | 5087  |
| MSTRG. 21433. 14 | coding    | 0. 139      | 894  | 3927  | 5883  |
| MSTRG. 21433. 15 | coding    | 0. 139      | 672  | 3705  | 5695  |
| MSTRG. 21433. 16 | coding    | 0. 139      | 459  | 3384  | 5340  |

|                  |           |             |      |      |       |
|------------------|-----------|-------------|------|------|-------|
| MSTRG. 21433. 18 | coding    | 0. 14       | 147  | 3081 | 5060  |
| MSTRG. 21433. 19 | coding    | 0. 148      | 1839 | 3300 | 3691  |
| MSTRG. 21433. 20 | coding    | 0. 141      | 2166 | 5106 | 7095  |
| MSTRG. 21433. 22 | noncoding | -0. 0499712 | 948  | 1191 | 2199  |
| MSTRG. 21441. 2  | coding    | 0. 26       | 0    | 531  | 715   |
| MSTRG. 21419. 1  | coding    | 0. 082      | 435  | 8979 | 10069 |
| MSTRG. 21425. 1  | noncoding | -0. 110592  | 123  | 138  | 292   |
| MSTRG. 21427. 2  | coding    | 0. 06       | 564  | 921  | 1400  |
| MSTRG. 21427. 1  | coding    | 0. 06       | 564  | 921  | 2889  |
| MSTRG. 21428. 1  | noncoding | -0. 159744  | 123  | 177  | 330   |
| MSTRG. 21429. 1  | noncoding | -0. 0086016 | 384  | 474  | 797   |
| MSTRG. 21432. 1  | noncoding | -0. 008192  | 27   | 129  | 486   |
| MSTRG. 21449. 1  | coding    | 0. 184      | 0    | 2643 | 8328  |
| MSTRG. 21449. 4  | coding    | 0. 139      | 777  | 2739 | 2896  |
| MSTRG. 21450. 1  | coding    | 0. 062      | 6561 | 6753 | 10910 |
| MSTRG. 21450. 2  | noncoding | -0. 008192  | 654  | 810  | 2412  |
| MSTRG. 21451. 1  | noncoding | -0. 0126976 | 105  | 303  | 1616  |
| MSTRG. 21449. 5  | noncoding | -0. 0159744 | 5385 | 5622 | 12673 |
| MSTRG. 21452. 1  | noncoding | -0. 0417792 | 1353 | 1674 | 15114 |
| MSTRG. 21453. 1  | noncoding | -0. 0483328 | 9549 | 9738 | 26598 |
| MSTRG. 21454. 1  | noncoding | -0. 0233472 | 4818 | 4995 | 11154 |
| MSTRG. 21454. 2  | coding    | 0. 057      | 1245 | 1422 | 2837  |
| MSTRG. 21446. 2  | coding    | 0. 107      | 1062 | 2550 | 2728  |
| MSTRG. 21447. 4  | noncoding | -0. 053248  | 375  | 558  | 1946  |
| MSTRG. 21447. 2  | noncoding | -0. 053248  | 375  | 558  | 2112  |
| MSTRG. 21471. 1  | coding    | 0. 327      | 609  | 4641 | 7813  |
| MSTRG. 21471. 3  | coding    | 0. 354      | 1848 | 4254 | 7437  |
| MSTRG. 21472. 1  | noncoding | -0. 0118784 | 84   | 198  | 388   |
| MSTRG. 21470. 3  | coding    | 0. 086      | 369  | 615  | 903   |
| MSTRG. 21474. 3  | coding    | 0. 16       | 771  | 1209 | 1419  |
| MSTRG. 21484. 4  | coding    | 0. 2        | 1278 | 3336 | 7211  |
| MSTRG. 21486. 2  | coding    | 0. 099      | 240  | 624  | 1229  |
| MSTRG. 21502. 2  | coding    | 0. 146      | 2847 | 4764 | 6716  |
| MSTRG. 21502. 7  | coding    | 0. 125      | 1785 | 3522 | 4853  |
| MSTRG. 21502. 4  | coding    | 0. 141      | 3120 | 4767 | 6099  |
| MSTRG. 21502. 6  | coding    | 0. 15       | 1770 | 3678 | 5009  |
| MSTRG. 21502. 5  | coding    | 0. 145      | 2862 | 4806 | 6137  |
| MSTRG. 21503. 1  | noncoding | -0. 02048   | 0    | 192  | 905   |
| MSTRG. 21511. 1  | noncoding | -0. 090112  | 1290 | 1365 | 2897  |
| MSTRG. 21520. 1  | noncoding | -0. 0090112 | 360  | 393  | 2502  |
| MSTRG. 21526. 1  | coding    | 0. 108      | 6    | 291  | 1250  |
| MSTRG. 21533. 1  | noncoding | -0. 0630784 | 0    | 117  | 377   |
| MSTRG. 21534. 1  | noncoding | -0. 004096  | 0    | 63   | 322   |
| MSTRG. 21532. 2  | coding    | 0. 16       | 441  | 2667 | 3190  |
| MSTRG. 21535. 1  | noncoding | -0. 0110592 | 5178 | 5331 | 10088 |
| MSTRG. 21532. 3  | coding    | 0. 091      | 7734 | 8277 | 8554  |
| MSTRG. 21536. 1  | noncoding | -0. 0004096 | 0    | 0    | 395   |
| MSTRG. 21537. 1  | noncoding | -0. 0053248 | 15   | 102  | 2409  |
| MSTRG. 21532. 4  | noncoding | -0. 012288  | 954  | 1095 | 6791  |
| MSTRG. 21538. 1  | noncoding | -0. 024576  | 843  | 945  | 5785  |
| MSTRG. 21499. 2  | coding    | 0. 232      | 210  | 663  | 1069  |
| MSTRG. 21499. 3  | coding    | 0. 234      | 87   | 543  | 949   |
| MSTRG. 21552. 1  | noncoding | -0. 0172032 | 2976 | 3120 | 6070  |
| MSTRG. 21553. 1  | coding    | 0. 114      | 792  | 1023 | 8609  |

|                |           |            |      |       |       |
|----------------|-----------|------------|------|-------|-------|
| MSTRG.21555.1  | noncoding | -0.0045056 | 2892 | 3039  | 4778  |
| MSTRG.21556.1  | noncoding | -0.0425984 | 5469 | 5631  | 6135  |
| MSTRG.21569.1  | noncoding | -0.0643072 | 282  | 561   | 857   |
| MSTRG.21572.1  | noncoding | -0.028672  | 348  | 633   | 939   |
| MSTRG.21572.2  | noncoding | -0.0688128 | 1014 | 1380  | 1617  |
| MSTRG.21573.5  | coding    | 0.181      | 1929 | 2343  | 10219 |
| MSTRG.21573.6  | coding    | 0.054      | 417  | 2058  | 3263  |
| MSTRG.21573.7  | coding    | 0.05       | 885  | 2529  | 4249  |
| MSTRG.21573.9  | coding    | 0.049      | 414  | 2094  | 3814  |
| MSTRG.21573.14 | coding    | 0.181      | 1929 | 2343  | 3576  |
| MSTRG.21575.1  | coding    | 0.4        | 42   | 1092  | 1996  |
| MSTRG.21580.1  | noncoding | -0.024576  | 153  | 282   | 5537  |
| MSTRG.21580.2  | coding    | 0.139      | 1746 | 1956  | 3122  |
| MSTRG.21580.3  | noncoding | -0.0192512 | 1176 | 1344  | 1571  |
| MSTRG.21598.1  | noncoding | -0.282624  | 99   | 135   | 292   |
| MSTRG.21612.1  | noncoding | -0.0012288 | 0    | 60    | 215   |
| MSTRG.21649.1  | noncoding | -0.086016  | 348  | 384   | 1114  |
| MSTRG.21656.9  | coding    | 0.422      | 9858 | 11472 | 13151 |
| MSTRG.21657.1  | noncoding | -0.012288  | 93   | 183   | 385   |
| MSTRG.21670.1  | noncoding | -0.0253952 | 339  | 450   | 1541  |
| MSTRG.21670.2  | noncoding | -0.073728  | 9    | 36    | 412   |
| MSTRG.21695.4  | coding    | 0.149      | 165  | 2499  | 3326  |
| MSTRG.21696.1  | noncoding | -0.008192  | 4065 | 4176  | 11003 |
| MSTRG.21695.6  | coding    | 0.14       | 159  | 2700  | 2855  |
| MSTRG.21697.1  | noncoding | -0.0008192 | 225  | 378   | 1758  |
| MSTRG.21695.7  | coding    | 0.056      | 231  | 1965  | 2866  |
| MSTRG.21698.1  | noncoding | -0.04096   | 1824 | 1881  | 2484  |
| MSTRG.21695.10 | coding    | 0.084      | 0    | 1065  | 2078  |
| MSTRG.21708.1  | noncoding | -0.0004096 | 0    | 0     | 209   |
| MSTRG.21674.1  | noncoding | -0.0057344 | 558  | 723   | 889   |
| MSTRG.21676.1  | noncoding | -0.0278528 | 753  | 867   | 1066  |
| MSTRG.21680.1  | noncoding | -0.016384  | 669  | 792   | 946   |
| MSTRG.21729.1  | noncoding | -0.221184  | 96   | 129   | 717   |
| MSTRG.21725.1  | noncoding | -0.0118784 | 720  | 936   | 1100  |
| MSTRG.21739.1  | noncoding | -0.08192   | 600  | 828   | 1603  |
| MSTRG.21741.2  | noncoding | -0.065536  | 258  | 357   | 907   |
| MSTRG.21741.1  | noncoding | -0.012288  | 543  | 681   | 1276  |
| MSTRG.21749.1  | coding    | 0.112      | 81   | 2682  | 4442  |
| MSTRG.21749.4  | coding    | 0.109      | 90   | 2397  | 2710  |
| MSTRG.21749.5  | noncoding | -0.045056  | 987  | 1191  | 14224 |
| MSTRG.21749.6  | noncoding | -0.045056  | 708  | 912   | 11715 |
| MSTRG.21749.7  | noncoding | -0.200704  | 108  | 153   | 358   |
| MSTRG.21751.1  | noncoding | -0.0376832 | 213  | 318   | 1860  |
| MSTRG.21752.1  | noncoding | -0.0004096 | 0    | 0     | 955   |
| MSTRG.21749.8  | noncoding | -0.028672  | 108  | 180   | 2194  |
| MSTRG.21753.1  | coding    | 0.079      | 1218 | 1875  | 5860  |
| MSTRG.21754.1  | noncoding | -0.08192   | 1728 | 1749  | 2362  |
| MSTRG.21754.2  | noncoding | -0.0294912 | 3936 | 4083  | 4388  |
| MSTRG.21749.9  | coding    | 0.102      | 300  | 2208  | 2924  |
| MSTRG.21755.1  | noncoding | -0.0229376 | 177  | 339   | 609   |
| MSTRG.21755.2  | noncoding | -0.016384  | 525  | 651   | 909   |
| MSTRG.21760.1  | noncoding | -0.0311296 | 468  | 648   | 3232  |
| MSTRG.21771.6  | coding    | 0.024      | 3741 | 8046  | 15724 |
| MSTRG.21772.1  | noncoding | -0.0360448 | 9837 | 9990  | 10782 |

|                  |           |             |       |       |       |
|------------------|-----------|-------------|-------|-------|-------|
| MSTRG. 21771. 19 | noncoding | -0. 0585728 | 102   | 333   | 2786  |
| MSTRG. 21771. 20 | coding    | 0. 075      | 87    | 726   | 4952  |
| MSTRG. 21771. 21 | coding    | 0. 075      | 75    | 714   | 2525  |
| MSTRG. 21771. 22 | coding    | 0. 075      | 117   | 753   | 3056  |
| MSTRG. 21771. 23 | noncoding | -0. 0585728 | 60    | 291   | 1921  |
| MSTRG. 21773. 1  | noncoding | -0. 0004096 | 159   | 288   | 2336  |
| MSTRG. 21775. 1  | noncoding | -0. 0589824 | 702   | 1068  | 1223  |
| MSTRG. 21771. 24 | coding    | 0. 04       | 3741  | 12441 | 15507 |
| MSTRG. 21771. 25 | coding    | 0. 037      | 3741  | 12504 | 15832 |
| MSTRG. 21771. 26 | coding    | 0. 037      | 3741  | 12453 | 15630 |
| MSTRG. 21771. 27 | coding    | 0. 039      | 3741  | 12390 | 15167 |
| MSTRG. 21771. 28 | coding    | 0. 062      | 1749  | 4377  | 5052  |
| MSTRG. 21771. 29 | noncoding | -0. 032768  | 3102  | 3234  | 3389  |
| MSTRG. 21763. 1  | noncoding | -0. 008192  | 45    | 141   | 391   |
| MSTRG. 21779. 2  | coding    | 0. 262      | 0     | 4809  | 6932  |
| MSTRG. 21779. 1  | coding    | 0. 267      | 0     | 4857  | 6981  |
| MSTRG. 21790. 1  | coding    | 0. 177      | 426   | 891   | 3571  |
| MSTRG. 21791. 2  | noncoding | -0. 0659456 | 0     | 132   | 1709  |
| MSTRG. 21795. 1  | noncoding | -0. 0192512 | 1194  | 1404  | 1560  |
| MSTRG. 21795. 3  | noncoding | -0. 026624  | 4092  | 4305  | 4460  |
| MSTRG. 21795. 4  | coding    | 0. 023      | 528   | 705   | 1303  |
| MSTRG. 21795. 5  | noncoding | -0. 026624  | 1440  | 1653  | 1808  |
| MSTRG. 21795. 6  | coding    | 0. 05       | 552   | 843   | 1697  |
| MSTRG. 21796. 1  | noncoding | -0. 032768  | 702   | 864   | 1019  |
| MSTRG. 21797. 1  | coding    | 0. 267      | 276   | 1827  | 4461  |
| MSTRG. 21797. 2  | coding    | 0. 267      | 291   | 1842  | 4862  |
| MSTRG. 21794. 1  | noncoding | -0. 0004096 | 0     | 0     | 209   |
| MSTRG. 21806. 2  | coding    | 0. 212      | 156   | 681   | 1158  |
| MSTRG. 21812. 2  | noncoding | -0. 0434176 | 2703  | 2961  | 4081  |
| MSTRG. 21812. 1  | noncoding | -0. 0208896 | 0     | 600   | 1507  |
| MSTRG. 21812. 4  | noncoding | -0. 0253952 | 5433  | 5856  | 6295  |
| MSTRG. 21808. 2  | coding    | 0. 185      | 0     | 615   | 3180  |
| MSTRG. 21815. 1  | noncoding | -0. 0335872 | 618   | 672   | 826   |
| MSTRG. 21817. 2  | noncoding | -0. 106496  | 0     | 138   | 610   |
| MSTRG. 21818. 3  | noncoding | -0. 0114688 | 192   | 552   | 1034  |
| MSTRG. 21819. 1  | coding    | 0. 377      | 0     | 909   | 2064  |
| MSTRG. 21820. 1  | noncoding | -0. 0434176 | 7086  | 7272  | 11129 |
| MSTRG. 21820. 2  | coding    | 0. 106      | 264   | 450   | 2074  |
| MSTRG. 21827. 2  | coding    | 0. 416      | 0     | 984   | 1738  |
| MSTRG. 21827. 3  | coding    | 0. 339      | 456   | 1293  | 2027  |
| MSTRG. 21829. 2  | coding    | 0. 451      | 0     | 6822  | 8261  |
| MSTRG. 21829. 3  | coding    | 0. 443      | 405   | 7371  | 8625  |
| MSTRG. 21831. 1  | coding    | 0. 47       | 0     | 3234  | 4588  |
| MSTRG. 21831. 10 | coding    | 0. 472      | 0     | 3162  | 4516  |
| MSTRG. 21831. 11 | coding    | 0. 467      | 0     | 3264  | 4618  |
| MSTRG. 21831. 3  | coding    | 0. 467      | 0     | 3336  | 4690  |
| MSTRG. 21831. 5  | coding    | 0. 473      | 0     | 3267  | 4621  |
| MSTRG. 21831. 7  | coding    | 0. 475      | 0     | 3198  | 4552  |
| MSTRG. 21831. 9  | coding    | 0. 426      | 0     | 2496  | 3079  |
| MSTRG. 21831. 12 | noncoding | -0. 055296  | 9678  | 11184 | 17445 |
| MSTRG. 21831. 13 | noncoding | -0. 137216  | 11403 | 13809 | 13964 |
| MSTRG. 21831. 14 | noncoding | -0. 0864256 | 780   | 3477  | 5269  |
| MSTRG. 21830. 1  | noncoding | -0. 053248  | 264   | 324   | 773   |
| MSTRG. 21834. 3  | coding    | 0. 493      | 0     | 1635  | 2757  |

|                  |           |             |       |       |       |
|------------------|-----------|-------------|-------|-------|-------|
| MSTRG. 21834. 2  | coding    | 0. 474      | 138   | 1632  | 2754  |
| MSTRG. 21837. 5  | coding    | 0. 392      | 0     | 9084  | 11865 |
| MSTRG. 21837. 6  | coding    | 0. 396      | 0     | 8841  | 11622 |
| MSTRG. 21837. 8  | coding    | 0. 393      | 0     | 9087  | 11868 |
| MSTRG. 21837. 9  | coding    | 0. 391      | 0     | 8952  | 11701 |
| MSTRG. 21842. 2  | coding    | 0. 317      | 378   | 2994  | 3303  |
| MSTRG. 21842. 6  | noncoding | -0. 0909312 | 0     | 216   | 4546  |
| MSTRG. 21841. 1  | noncoding | -0. 012288  | 177   | 288   | 578   |
| MSTRG. 21846. 1  | coding    | 0. 296      | 168   | 2331  | 4511  |
| MSTRG. 21846. 2  | noncoding | -0. 0335872 | 1287  | 2490  | 3091  |
| MSTRG. 21846. 3  | coding    | 0. 318      | 84    | 1002  | 1775  |
| MSTRG. 21856. 2  | coding    | 0. 147      | 690   | 1563  | 1977  |
| MSTRG. 21863. 1  | noncoding | -0. 0405504 | 339   | 657   | 2314  |
| MSTRG. 21864. 2  | coding    | 0. 058      | 819   | 1221  | 6719  |
| MSTRG. 21865. 1  | noncoding | -0. 0442368 | 0     | 606   | 6173  |
| MSTRG. 21850. 3  | coding    | 0. 164      | 156   | 783   | 2630  |
| MSTRG. 21850. 2  | coding    | 0. 193      | 0     | 1002  | 2851  |
| MSTRG. 21867. 1  | coding    | 0. 514      | 0     | 1611  | 1978  |
| MSTRG. 21870. 1  | noncoding | -0. 110592  | 105   | 132   | 419   |
| MSTRG. 21874. 1  | coding    | 0. 005      | 75    | 519   | 2866  |
| MSTRG. 21876. 1  | noncoding | -0. 1867776 | 66    | 75    | 642   |
| MSTRG. 21880. 1  | coding    | 0. 356      | 780   | 3879  | 8412  |
| MSTRG. 21880. 2  | coding    | 0. 332      | 2139  | 4056  | 8587  |
| MSTRG. 21880. 3  | coding    | 0. 328      | 267   | 2235  | 6757  |
| MSTRG. 21880. 4  | noncoding | -0. 0258048 | 330   | 642   | 8243  |
| MSTRG. 21880. 5  | noncoding | -0. 0421888 | 13569 | 13890 | 42836 |
| MSTRG. 21880. 6  | noncoding | -0. 0180224 | 37491 | 37785 | 38687 |
| MSTRG. 21881. 1  | noncoding | -0. 02048   | 0     | 63    | 258   |
| MSTRG. 21880. 7  | noncoding | -0. 0339968 | 13788 | 13986 | 17189 |
| MSTRG. 21880. 8  | noncoding | -0. 0114688 | 32355 | 32514 | 32669 |
| MSTRG. 21880. 9  | noncoding | -0. 0180224 | 21753 | 22047 | 22949 |
| MSTRG. 21885. 4  | coding    | 0. 289      | 177   | 900   | 1056  |
| MSTRG. 21885. 3  | coding    | 0. 323      | 678   | 1281  | 1437  |
| MSTRG. 21886. 1  | noncoding | -0. 0036864 | 2163  | 2265  | 2767  |
| MSTRG. 21887. 1  | coding    | 0. 46       | 1599  | 5025  | 5437  |
| MSTRG. 21889. 1  | noncoding | -0. 0544768 | 795   | 1242  | 1427  |
| MSTRG. 21890. 2  | coding    | 0. 582      | 1416  | 4281  | 4894  |
| MSTRG. 21890. 3  | noncoding | -0. 2056192 | 534   | 1389  | 1563  |
| MSTRG. 21890. 4  | coding    | 0. 582      | 801   | 3666  | 3842  |
| MSTRG. 21890. 5  | noncoding | -0. 229376  | 534   | 2301  | 2475  |
| MSTRG. 21890. 6  | coding    | 0. 578      | 1353  | 4038  | 4214  |
| MSTRG. 21890. 7  | coding    | 0. 57       | 534   | 2757  | 2931  |
| MSTRG. 21890. 8  | coding    | 0. 533      | 483   | 2736  | 2912  |
| MSTRG. 21890. 12 | coding    | 0. 486      | 27    | 726   | 880   |
| MSTRG. 21890. 20 | coding    | 0. 535      | 27    | 1182  | 1336  |
| MSTRG. 21890. 15 | coding    | 0. 476      | 27    | 798   | 954   |
| MSTRG. 21890. 19 | noncoding | -0. 2367488 | 27    | 2655  | 2810  |
| MSTRG. 21890. 10 | coding    | 0. 507      | 27    | 843   | 999   |
| MSTRG. 21890. 21 | noncoding | -0. 2285568 | 597   | 2166  | 2319  |
| MSTRG. 21890. 22 | coding    | 0. 49       | 126   | 831   | 984   |
| MSTRG. 21882. 1  | noncoding | -0. 0004096 | 63    | 162   | 680   |
| MSTRG. 21883. 1  | noncoding | -0. 0176128 | 105   | 336   | 1122  |
| MSTRG. 21897. 10 | coding    | 0. 487      | 0     | 8532  | 9004  |
| MSTRG. 21897. 11 | coding    | 0. 491      | 0     | 8364  | 8838  |



|                  |           |             |       |       |       |
|------------------|-----------|-------------|-------|-------|-------|
| MSTRG. 21897. 12 | coding    | 0. 492      | 0     | 8370  | 8844  |
| MSTRG. 21897. 13 | coding    | 0. 482      | 12    | 8517  | 8993  |
| MSTRG. 21897. 15 | coding    | 0. 485      | 12    | 8412  | 8888  |
| MSTRG. 21897. 16 | coding    | 0. 491      | 0     | 8364  | 8838  |
| MSTRG. 21897. 17 | coding    | 0. 486      | 0     | 8529  | 9003  |
| MSTRG. 21897. 18 | coding    | 0. 482      | 12    | 8460  | 8936  |
| MSTRG. 21897. 3  | coding    | 0. 492      | 0     | 8370  | 8844  |
| MSTRG. 21897. 4  | coding    | 0. 492      | 0     | 8367  | 8841  |
| MSTRG. 21897. 5  | coding    | 0. 495      | 0     | 8229  | 8703  |
| MSTRG. 21897. 6  | coding    | 0. 489      | 0     | 8418  | 8892  |
| MSTRG. 21897. 7  | coding    | 0. 484      | 12    | 8409  | 8885  |
| MSTRG. 21897. 8  | coding    | 0. 489      | 0     | 8418  | 8892  |
| MSTRG. 21897. 9  | coding    | 0. 489      | 0     | 8421  | 8895  |
| MSTRG. 21898. 2  | noncoding | -0. 0356352 | 696   | 873   | 1703  |
| MSTRG. 21898. 1  | noncoding | -0. 0241664 | 0     | 108   | 1628  |
| MSTRG. 21899. 1  | noncoding | -0. 14336   | 417   | 480   | 868   |
| MSTRG. 21897. 19 | coding    | 0. 48       | 1644  | 8712  | 9187  |
| MSTRG. 21897. 20 | coding    | 0. 472      | 840   | 7818  | 8292  |
| MSTRG. 21897. 21 | coding    | 0. 472      | 11562 | 18384 | 18860 |
| MSTRG. 21897. 22 | coding    | 0. 441      | 0     | 6891  | 7367  |
| MSTRG. 21897. 23 | coding    | 0. 459      | 0     | 6468  | 6942  |
| MSTRG. 21897. 24 | coding    | 0. 467      | 0     | 6291  | 6766  |
| MSTRG. 21897. 25 | coding    | 0. 461      | 387   | 6393  | 6867  |
| MSTRG. 21897. 26 | coding    | 0. 443      | 465   | 5475  | 5951  |
| MSTRG. 21902. 1  | noncoding | -0. 196608  | 1020  | 1071  | 1226  |
| MSTRG. 21903. 2  | coding    | 0. 096      | 1014  | 1656  | 4305  |
| MSTRG. 21903. 5  | noncoding | -0. 0094208 | 888   | 1056  | 1211  |
| MSTRG. 21903. 3  | noncoding | -0. 0606208 | 444   | 723   | 876   |
| MSTRG. 21903. 4  | noncoding | -0. 0753664 | 3198  | 3414  | 3568  |
| MSTRG. 21903. 7  | noncoding | -0. 114688  | 555   | 639   | 793   |
| MSTRG. 21905. 2  | noncoding | -0. 108544  | 0     | 399   | 5067  |
| MSTRG. 21905. 3  | noncoding | -0. 1163264 | 0     | 399   | 11573 |
| MSTRG. 21905. 6  | noncoding | -0. 0446464 | 8880  | 9093  | 20743 |
| MSTRG. 21907. 2  | coding    | 0. 316      | 0     | 1734  | 4936  |
| MSTRG. 21907. 3  | coding    | 0. 236      | 0     | 2550  | 5461  |
| MSTRG. 21912. 1  | coding    | 0. 413      | 0     | 2142  | 2934  |
| MSTRG. 21912. 2  | coding    | 0. 335      | 0     | 1488  | 1658  |
| MSTRG. 21900. 5  | coding    | 0. 312      | 0     | 1044  | 1198  |
| MSTRG. 21916. 3  | coding    | 0. 113      | 1638  | 2817  | 5032  |
| MSTRG. 21917. 1  | noncoding | -0. 012288  | 132   | 231   | 1741  |
| MSTRG. 21918. 2  | noncoding | -0. 147456  | 0     | 429   | 1221  |
| MSTRG. 21919. 4  | coding    | 0. 267      | 297   | 702   | 974   |
| MSTRG. 21919. 5  | noncoding | -0. 098304  | 213   | 267   | 564   |
| MSTRG. 21920. 7  | coding    | 0. 05       | 1014  | 3963  | 4507  |
| MSTRG. 21925. 1  | coding    | 0. 564      | 96    | 3906  | 6705  |
| MSTRG. 21926. 1  | noncoding | -0. 0073728 | 105   | 324   | 485   |
| MSTRG. 21925. 2  | coding    | 0. 53       | 1629  | 3816  | 4075  |
| MSTRG. 21925. 3  | coding    | 0. 564      | 1482  | 5292  | 8333  |
| MSTRG. 21927. 1  | noncoding | -0. 012288  | 207   | 252   | 406   |
| MSTRG. 21927. 2  | noncoding | -0. 0274432 | 99    | 339   | 685   |
| MSTRG. 21925. 4  | coding    | 0. 564      | 351   | 4161  | 6940  |
| MSTRG. 21925. 5  | coding    | 0. 564      | 717   | 4530  | 7570  |
| MSTRG. 21928. 2  | noncoding | -0. 1757184 | 585   | 1038  | 1368  |
| MSTRG. 21921. 2  | coding    | 0. 341      | 0     | 813   | 2554  |

|                  |           |             |      |      |      |
|------------------|-----------|-------------|------|------|------|
| MSTRG. 21932. 2  | coding    | 0. 175      | 0    | 1011 | 2628 |
| MSTRG. 21932. 3  | coding    | 0. 221      | 1146 | 1896 | 2445 |
| MSTRG. 21934. 2  | noncoding | -0. 04096   | 495  | 609  | 928  |
| MSTRG. 21935. 2  | coding    | 0. 308      | 0    | 165  | 430  |
| MSTRG. 21941. 1  | coding    | 0. 102      | 1209 | 6504 | 7981 |
| MSTRG. 21941. 2  | coding    | 0. 102      | 1545 | 6840 | 8253 |
| MSTRG. 21942. 1  | noncoding | -0. 0438272 | 1386 | 1914 | 2280 |
| MSTRG. 21942. 5  | noncoding | -0. 0323584 | 1110 | 1776 | 2292 |
| MSTRG. 21939. 2  | coding    | 0. 335      | 141  | 4269 | 5881 |
| MSTRG. 21940. 1  | noncoding | -0. 0241664 | 672  | 795  | 1287 |
| MSTRG. 21939. 3  | coding    | 0. 334      | 363  | 6561 | 8173 |
| MSTRG. 21939. 4  | coding    | 0. 343      | 96   | 6492 | 8106 |
| MSTRG. 21943. 1  | coding    | 0. 456      | 12   | 1950 | 2105 |
| MSTRG. 21943. 2  | coding    | 0. 487      | 0    | 1911 | 2099 |
| MSTRG. 21949. 1  | coding    | 0. 476      | 0    | 621  | 3714 |
| MSTRG. 21953. 1  | noncoding | -0. 0004096 | 0    | 0    | 306  |
| MSTRG. 21955. 1  | noncoding | -0. 0155648 | 570  | 708  | 910  |
| MSTRG. 21958. 4  | noncoding | -0. 06144   | 183  | 528  | 683  |
| MSTRG. 21958. 5  | noncoding | -0. 1028096 | 357  | 729  | 1010 |
| MSTRG. 21958. 10 | noncoding | -0. 075776  | 561  | 795  | 1227 |
| MSTRG. 21958. 3  | coding    | 0. 337      | 147  | 552  | 739  |
| MSTRG. 21958. 6  | noncoding | -0. 09216   | 147  | 399  | 897  |
| MSTRG. 21958. 7  | noncoding | -0. 09216   | 147  | 399  | 1124 |
| MSTRG. 21958. 8  | coding    | 0. 33       | 147  | 534  | 966  |
| MSTRG. 21958. 9  | noncoding | -0. 09216   | 147  | 399  | 1043 |
| MSTRG. 21959. 1  | noncoding | -0. 004096  | 243  | 378  | 767  |
| MSTRG. 21961. 2  | coding    | 0. 456      | 0    | 2400 | 3613 |
| MSTRG. 21961. 3  | coding    | 0. 458      | 0    | 2409 | 3622 |
| MSTRG. 21961. 4  | coding    | 0. 435      | 12   | 1533 | 2790 |
| MSTRG. 21961. 5  | coding    | 0. 405      | 12   | 1659 | 2916 |
| MSTRG. 21963. 3  | coding    | 0. 233      | 0    | 1350 | 1606 |
| MSTRG. 21977. 2  | coding    | 0. 285      | 267  | 1257 | 1882 |
| MSTRG. 21978. 2  | coding    | 0. 073      | 462  | 2301 | 2460 |
| MSTRG. 21980. 1  | noncoding | -0. 049152  | 351  | 402  | 1715 |
| MSTRG. 21985. 2  | coding    | 0. 204      | 0    | 3474 | 5931 |
| MSTRG. 21985. 4  | coding    | 0. 232      | 0    | 3027 | 5483 |
| MSTRG. 21985. 5  | coding    | 0. 219      | 783  | 3501 | 5957 |
| MSTRG. 21985. 6  | coding    | 0. 232      | 0    | 2940 | 3743 |
| MSTRG. 21985. 7  | coding    | 0. 232      | 0    | 3027 | 3953 |
| MSTRG. 21985. 8  | coding    | 0. 261      | 4020 | 5262 | 9683 |
| MSTRG. 21987. 2  | coding    | 0. 176      | 0    | 1746 | 7021 |
| MSTRG. 21987. 3  | noncoding | -0. 004096  | 540  | 756  | 1700 |
| MSTRG. 21965. 1  | coding    | 0. 244      | 0    | 711  | 2349 |
| MSTRG. 21965. 2  | coding    | 0. 085      | 132  | 510  | 801  |
| MSTRG. 21966. 1  | noncoding | -0. 208896  | 3    | 60   | 1157 |
| MSTRG. 21967. 1  | coding    | 0. 043      | 192  | 519  | 1100 |
| MSTRG. 21967. 2  | coding    | 0. 061      | 207  | 513  | 1094 |
| MSTRG. 21967. 4  | coding    | 0. 061      | 135  | 441  | 1021 |
| MSTRG. 21967. 5  | coding    | 0. 041      | 120  | 447  | 1027 |
| MSTRG. 21967. 6  | coding    | 0. 043      | 192  | 519  | 1099 |
| MSTRG. 21968. 3  | coding    | 0. 082      | 114  | 552  | 775  |
| MSTRG. 21971. 1  | coding    | 0. 06       | 0    | 1683 | 8233 |
| MSTRG. 21971. 2  | coding    | 0. 107      | 801  | 1731 | 7731 |
| MSTRG. 21972. 1  | coding    | 0. 336      | 0    | 882  | 1269 |

|                  |           |             |      |      |       |
|------------------|-----------|-------------|------|------|-------|
| MSTRG. 21994. 4  | coding    | 0. 383      | 0    | 2019 | 4981  |
| MSTRG. 21994. 3  | coding    | 0. 267      | 0    | 1863 | 4984  |
| MSTRG. 21994. 5  | coding    | 0. 47       | 0    | 963  | 3498  |
| MSTRG. 21996. 12 | coding    | 0. 077      | 1017 | 2337 | 3135  |
| MSTRG. 21996. 17 | coding    | 0. 055      | 7143 | 9690 | 10488 |
| MSTRG. 21996. 14 | coding    | 0. 078      | 2268 | 4737 | 5533  |
| MSTRG. 21996. 16 | coding    | 0. 149      | 216  | 885  | 3668  |
| MSTRG. 21996. 9  | coding    | 0. 056      | 603  | 3426 | 4222  |
| MSTRG. 21996. 10 | coding    | 0. 105      | 0    | 3270 | 4067  |
| MSTRG. 21996. 13 | coding    | 0. 061      | 1674 | 4287 | 5085  |
| MSTRG. 21996. 6  | coding    | 0. 113      | 0    | 3054 | 3851  |
| MSTRG. 21996. 8  | coding    | 0. 098      | 0    | 3198 | 3995  |
| MSTRG. 21996. 15 | coding    | 0. 058      | 0    | 3156 | 3953  |
| MSTRG. 21997. 1  | noncoding | -0. 053248  | 42   | 111  | 3413  |
| MSTRG. 22002. 2  | coding    | 0. 277      | 1698 | 2982 | 4157  |
| MSTRG. 22005. 4  | coding    | 0. 274      | 609  | 3216 | 3814  |
| MSTRG. 22008. 1  | noncoding | -0. 0311296 | 6411 | 6726 | 8009  |
| MSTRG. 22008. 2  | noncoding | -0. 0311296 | 6438 | 6753 | 20159 |
| MSTRG. 22008. 3  | noncoding | -0. 0311296 | 696  | 1011 | 1687  |
| MSTRG. 22010. 3  | coding    | 0. 392      | 1689 | 7689 | 10129 |
| MSTRG. 22010. 4  | coding    | 0. 442      | 1401 | 6162 | 8601  |
| MSTRG. 22010. 5  | coding    | 0. 389      | 255  | 6300 | 8725  |
| MSTRG. 22021. 1  | noncoding | -0. 0077824 | 975  | 1089 | 1502  |
| MSTRG. 22014. 1  | noncoding | -0. 004096  | 291  | 546  | 701   |
| MSTRG. 22026. 1  | coding    | 0. 308      | 0    | 1038 | 3283  |
| MSTRG. 22028. 1  | coding    | 0. 075      | 9054 | 9291 | 10582 |
| MSTRG. 22027. 4  | noncoding | -0. 065536  | 2895 | 2970 | 3447  |
| MSTRG. 22029. 1  | noncoding | -0. 06144   | 123  | 138  | 1527  |
| MSTRG. 22027. 6  | coding    | 0. 305      | 516  | 2673 | 3956  |
| MSTRG. 22034. 2  | coding    | 0. 287      | 0    | 2007 | 6953  |
| MSTRG. 22034. 5  | coding    | 0. 179      | 0    | 1392 | 4270  |
| MSTRG. 22030. 3  | coding    | 0. 448      | 66   | 3174 | 8021  |
| MSTRG. 22030. 2  | coding    | 0. 448      | 66   | 3174 | 9162  |
| MSTRG. 22030. 4  | coding    | 0. 447      | 258  | 3309 | 9177  |
| MSTRG. 22038. 3  | coding    | 0. 408      | 0    | 1935 | 3351  |
| MSTRG. 22041. 3  | coding    | 0. 567      | 0    | 438  | 2411  |
| MSTRG. 22041. 4  | coding    | 0. 441      | 1332 | 1674 | 1864  |
| MSTRG. 22042. 1  | noncoding | -0. 057344  | 126  | 150  | 461   |
| MSTRG. 22043. 1  | coding    | 0. 406      | 0    | 1797 | 3311  |
| MSTRG. 22043. 3  | coding    | 0. 419      | 183  | 777  | 1309  |
| MSTRG. 22043. 4  | coding    | 0. 372      | 0    | 1962 | 2263  |
| MSTRG. 22045. 2  | coding    | 0. 371      | 54   | 573  | 3852  |
| MSTRG. 22046. 2  | coding    | 0. 24       | 0    | 612  | 14928 |
| MSTRG. 22050. 3  | coding    | 0. 171      | 525  | 7104 | 7878  |
| MSTRG. 22051. 1  | noncoding | -0. 0004096 | 0    | 0    | 955   |
| MSTRG. 22051. 2  | noncoding | -0. 0004096 | 0    | 0    | 966   |
| MSTRG. 22050. 4  | coding    | 0. 118      | 843  | 1653 | 2428  |
| MSTRG. 22056. 1  | noncoding | -0. 0495616 | 0    | 117  | 764   |
| MSTRG. 22058. 1  | noncoding | -0. 04096   | 405  | 465  | 619   |
| MSTRG. 22063. 3  | coding    | 0. 472      | 2235 | 4509 | 5109  |
| MSTRG. 22063. 4  | coding    | 0. 525      | 45   | 2850 | 3448  |
| MSTRG. 22063. 5  | coding    | 0. 446      | 912  | 1770 | 2369  |
| MSTRG. 22059. 1  | noncoding | -0. 0442368 | 0    | 471  | 963   |
| MSTRG. 22059. 2  | noncoding | -0. 057344  | 0    | 189  | 401   |

|                  |           |             |      |       |       |
|------------------|-----------|-------------|------|-------|-------|
| MSTRG. 22064. 3  | coding    | 0. 397      | 0    | 1965  | 2634  |
| MSTRG. 22064. 4  | coding    | 0. 377      | 0    | 2094  | 2763  |
| MSTRG. 22065. 2  | coding    | 0. 481      | 252  | 1146  | 1886  |
| MSTRG. 22068. 1  | coding    | 0. 595      | 0    | 2583  | 3249  |
| MSTRG. 22071. 2  | coding    | 0. 416      | 516  | 1524  | 1711  |
| MSTRG. 22072. 1  | coding    | 0. 456      | 63   | 2562  | 5038  |
| MSTRG. 22072. 3  | coding    | 0. 437      | 1224 | 1866  | 2021  |
| MSTRG. 22074. 1  | noncoding | -0. 0274432 | 33   | 264   | 438   |
| MSTRG. 22070. 1  | coding    | 0. 181      | 87   | 639   | 4589  |
| MSTRG. 22070. 2  | coding    | 0. 256      | 0    | 564   | 4939  |
| MSTRG. 22075. 2  | coding    | 0. 349      | 300  | 2406  | 4574  |
| MSTRG. 22075. 3  | coding    | 0. 349      | 645  | 2751  | 4818  |
| MSTRG. 22075. 4  | coding    | 0. 349      | 396  | 2502  | 4570  |
| MSTRG. 22076. 1  | noncoding | -0. 1593344 | 75   | 105   | 260   |
| MSTRG. 22078. 3  | coding    | 0. 219      | 33   | 1845  | 2721  |
| MSTRG. 22080. 1  | coding    | 0. 227      | 90   | 888   | 1057  |
| MSTRG. 22080. 6  | coding    | 0. 21       | 159  | 942   | 1110  |
| MSTRG. 22113. 6  | coding    | 0. 392      | 7611 | 11316 | 11472 |
| MSTRG. 22113. 5  | coding    | 0. 298      | 0    | 13392 | 15602 |
| MSTRG. 22113. 7  | coding    | 0. 257      | 0    | 11496 | 11653 |
| MSTRG. 22114. 1  | noncoding | -0. 0585728 | 3009 | 3186  | 3722  |
| MSTRG. 22113. 9  | coding    | 0. 392      | 5898 | 9600  | 9757  |
| MSTRG. 22115. 3  | coding    | 0. 203      | 417  | 2238  | 3088  |
| MSTRG. 22116. 1  | noncoding | -0. 0446464 | 831  | 1173  | 1539  |
| MSTRG. 22117. 1  | noncoding | -0. 0004096 | 87   | 87    | 534   |
| MSTRG. 22118. 4  | coding    | 0. 106      | 0    | 2523  | 3186  |
| MSTRG. 22118. 2  | coding    | 0. 144      | 0    | 2319  | 4982  |
| MSTRG. 22118. 3  | coding    | 0. 158      | 0    | 1296  | 4271  |
| MSTRG. 22118. 5  | coding    | 0. 132      | 1233 | 3345  | 3907  |
| MSTRG. 22126. 1  | coding    | 0. 181      | 618  | 2610  | 3598  |
| MSTRG. 22126. 2  | coding    | 0. 175      | 609  | 2607  | 3488  |
| MSTRG. 22126. 3  | coding    | 0. 181      | 750  | 2754  | 6169  |
| MSTRG. 22126. 4  | coding    | 0. 181      | 615  | 2607  | 3486  |
| MSTRG. 22126. 5  | coding    | 0. 169      | 99   | 2031  | 3053  |
| MSTRG. 22126. 10 | coding    | 0. 139      | 15   | 2562  | 3150  |
| MSTRG. 22082. 3  | coding    | 0. 481      | 606  | 8553  | 9223  |
| MSTRG. 22082. 5  | coding    | 0. 287      | 1329 | 7536  | 7693  |
| MSTRG. 22082. 4  | coding    | 0. 486      | 0    | 7701  | 7858  |
| MSTRG. 22084. 2  | coding    | 0. 351      | 6534 | 8958  | 10290 |
| MSTRG. 22086. 1  | coding    | 0. 295      | 0    | 423   | 704   |
| MSTRG. 22089. 3  | coding    | 0. 193      | 54   | 1383  | 3094  |
| MSTRG. 22089. 4  | coding    | 0. 252      | 2355 | 3234  | 4943  |
| MSTRG. 22089. 5  | coding    | 0. 16       | 54   | 1314  | 1469  |
| MSTRG. 22091. 1  | noncoding | -0. 0647168 | 45   | 246   | 668   |
| MSTRG. 22091. 3  | coding    | 0. 209      | 0    | 324   | 747   |
| MSTRG. 22098. 2  | coding    | 0. 14       | 57   | 429   | 3015  |
| MSTRG. 22099. 2  | coding    | 0. 329      | 297  | 1320  | 1477  |
| MSTRG. 22103. 2  | coding    | 0. 588      | 0    | 627   | 4016  |
| MSTRG. 22139. 5  | coding    | 0. 186      | 279  | 1365  | 2201  |
| MSTRG. 22139. 6  | coding    | 0. 221      | 279  | 2178  | 3140  |
| MSTRG. 22141. 1  | noncoding | -0. 0622592 | 852  | 1290  | 1740  |
| MSTRG. 22141. 2  | noncoding | -0. 1294336 | 0    | 180   | 3380  |
| MSTRG. 22141. 3  | noncoding | -0. 114688  | 0    | 153   | 780   |
| MSTRG. 22142. 1  | coding    | 0. 46       | 366  | 924   | 1796  |

|                  |           |             |       |       |       |
|------------------|-----------|-------------|-------|-------|-------|
| MSTRG. 22145. 2  | coding    | 0. 263      | 0     | 486   | 877   |
| MSTRG. 22146. 1  | coding    | 0. 382      | 0     | 3297  | 7258  |
| MSTRG. 22146. 2  | coding    | 0. 371      | 234   | 3654  | 7220  |
| MSTRG. 22146. 3  | coding    | 0. 371      | 213   | 3633  | 6868  |
| MSTRG. 22147. 2  | coding    | 0. 49       | 12    | 1002  | 3547  |
| MSTRG. 22147. 3  | coding    | 0. 483      | 819   | 1776  | 4322  |
| MSTRG. 22155. 1  | coding    | 0. 481      | 258   | 7101  | 8805  |
| MSTRG. 22155. 2  | coding    | 0. 478      | 75    | 7002  | 8705  |
| MSTRG. 22155. 4  | coding    | 0. 494      | 2595  | 7191  | 7651  |
| MSTRG. 22155. 3  | coding    | 0. 494      | 2472  | 7068  | 7527  |
| MSTRG. 22155. 7  | coding    | 0. 388      | 207   | 717   | 918   |
| MSTRG. 22150. 1  | coding    | 0. 247      | 0     | 351   | 2240  |
| MSTRG. 22152. 2  | coding    | 0. 209      | 0     | 3069  | 8043  |
| MSTRG. 22152. 3  | coding    | 0. 386      | 1917  | 3090  | 8091  |
| MSTRG. 22152. 5  | coding    | 0. 363      | 1002  | 2946  | 9084  |
| MSTRG. 22153. 1  | coding    | 0. 298      | 9     | 1548  | 3803  |
| MSTRG. 22168. 1  | noncoding | -0. 063488  | 5193  | 5349  | 5539  |
| MSTRG. 22179. 1  | noncoding | -0. 065536  | 19914 | 20130 | 29808 |
| MSTRG. 22179. 2  | noncoding | -0. 0679936 | 0     | 1050  | 7590  |
| MSTRG. 22179. 3  | noncoding | -0. 0417792 | 10863 | 11064 | 12282 |
| MSTRG. 22179. 4  | noncoding | -0. 065536  | 10878 | 11094 | 20255 |
| MSTRG. 22179. 5  | noncoding | -0. 0602112 | 9912  | 10128 | 19288 |
| MSTRG. 22179. 7  | noncoding | -0. 0299008 | 4383  | 4563  | 8547  |
| MSTRG. 22179. 8  | noncoding | -0. 0004096 | 624   | 762   | 3450  |
| MSTRG. 22179. 9  | noncoding | -0. 0004096 | 624   | 762   | 4625  |
| MSTRG. 22179. 6  | noncoding | -0. 0299008 | 4191  | 4371  | 8815  |
| MSTRG. 22179. 10 | noncoding | -0. 0299008 | 4377  | 4557  | 8974  |
| MSTRG. 22179. 11 | noncoding | -0. 0299008 | 4188  | 4368  | 8785  |
| MSTRG. 22179. 13 | noncoding | -0. 0299008 | 4377  | 4557  | 9001  |
| MSTRG. 22179. 12 | noncoding | -0. 0004096 | 621   | 759   | 5255  |
| MSTRG. 22179. 14 | noncoding | -0. 0520192 | 1464  | 1851  | 2654  |
| MSTRG. 22179. 15 | noncoding | -0. 0393216 | 10515 | 10881 | 31423 |
| MSTRG. 22179. 16 | noncoding | -0. 0393216 | 19632 | 19998 | 32402 |
| MSTRG. 22181. 1  | noncoding | -0. 0167936 | 6594  | 6750  | 10550 |
| MSTRG. 22181. 2  | noncoding | -0. 0950272 | 4365  | 4548  | 11045 |
| MSTRG. 22181. 3  | noncoding | -0. 0385024 | 7422  | 7659  | 10692 |
| MSTRG. 22181. 4  | noncoding | -0. 0167936 | 5802  | 5958  | 6918  |
| MSTRG. 22181. 5  | noncoding | -0. 04096   | 26670 | 26901 | 36338 |
| MSTRG. 22181. 6  | noncoding | -0. 04096   | 10437 | 10668 | 20101 |
| MSTRG. 22182. 1  | coding    | 0. 186      | 1098  | 1986  | 3332  |
| MSTRG. 22182. 3  | coding    | 0. 182      | 396   | 1278  | 2622  |
| MSTRG. 22181. 7  | noncoding | -0. 04096   | 4368  | 4599  | 7829  |
| MSTRG. 22184. 1  | coding    | 0. 325      | 540   | 5940  | 11115 |
| MSTRG. 22184. 2  | noncoding | -0. 0663552 | 531   | 993   | 7108  |
| MSTRG. 22184. 3  | coding    | 0. 325      | 579   | 5979  | 11155 |
| MSTRG. 22184. 5  | coding    | 0. 325      | 7602  | 13002 | 18177 |
| MSTRG. 22184. 6  | coding    | 0. 325      | 945   | 6345  | 11522 |
| MSTRG. 22185. 1  | noncoding | -0. 0434176 | 2298  | 2631  | 3880  |
| MSTRG. 22170. 2  | coding    | 0. 46       | 1110  | 1737  | 1892  |
| MSTRG. 22172. 3  | coding    | 0. 221      | 0     | 777   | 1271  |
| MSTRG. 22175. 1  | coding    | 0. 55       | 3840  | 7821  | 8156  |
| MSTRG. 22175. 2  | coding    | 0. 55       | 3069  | 7050  | 7384  |
| MSTRG. 22189. 2  | noncoding | -0. 0159744 | 705   | 849   | 1004  |
| MSTRG. 22190. 1  | noncoding | -0. 0258048 | 882   | 1053  | 1841  |

|                 |           |             |       |       |       |
|-----------------|-----------|-------------|-------|-------|-------|
| MSTRG. 22190. 2 | noncoding | -0. 034816  | 2154  | 2460  | 4986  |
| MSTRG. 22191. 2 | noncoding | -0. 063488  | 873   | 1164  | 4051  |
| MSTRG. 22192. 3 | coding    | 0. 381      | 1098  | 3084  | 4241  |
| MSTRG. 22195. 3 | coding    | 0. 62       | 267   | 1455  | 2014  |
| MSTRG. 22195. 2 | coding    | 0. 606      | 366   | 1602  | 2159  |
| MSTRG. 22178. 2 | noncoding | -0. 0581632 | 375   | 612   | 1259  |
| MSTRG. 22178. 3 | noncoding | -0. 0270336 | 3066  | 3750  | 9445  |
| MSTRG. 22188. 1 | noncoding | -0. 0180224 | 744   | 834   | 991   |
| MSTRG. 22197. 1 | noncoding | -0. 0425984 | 0     | 75    | 347   |
| MSTRG. 22219. 1 | coding    | 0. 331      | 2496  | 7521  | 10386 |
| MSTRG. 22220. 1 | noncoding | -0. 026624  | 279   | 435   | 594   |
| MSTRG. 22219. 2 | coding    | 0. 169      | 33    | 744   | 1398  |
| MSTRG. 22219. 5 | coding    | 0. 155      | 2106  | 2796  | 4918  |
| MSTRG. 22219. 3 | coding    | 0. 144      | 3870  | 4542  | 6664  |
| MSTRG. 22223. 5 | noncoding | -0. 0483328 | 276   | 471   | 1672  |
| MSTRG. 22224. 1 | noncoding | -0. 0004096 | 3858  | 4095  | 8487  |
| MSTRG. 22226. 1 | noncoding | -0. 094208  | 7458  | 7545  | 19619 |
| MSTRG. 22228. 1 | coding    | 0. 095      | 20553 | 21672 | 23063 |
| MSTRG. 22228. 2 | noncoding | -0. 004096  | 1002  | 1023  | 1179  |
| MSTRG. 22223. 6 | coding    | 0. 187      | 0     | 426   | 4163  |
| MSTRG. 22230. 1 | noncoding | -0. 151552  | 1392  | 1401  | 2053  |
| MSTRG. 22199. 1 | noncoding | -0. 0577536 | 0     | 198   | 492   |
| MSTRG. 22200. 1 | noncoding | -0. 036864  | 2781  | 2883  | 3665  |
| MSTRG. 22203. 2 | coding    | 0. 185      | 9     | 789   | 1009  |
| MSTRG. 22204. 1 | noncoding | -0. 0045056 | 189   | 336   | 894   |
| MSTRG. 22205. 1 | coding    | 0. 318      | 0     | 1170  | 1889  |
| MSTRG. 22205. 2 | coding    | 0. 319      | 0     | 1017  | 1736  |
| MSTRG. 22205. 4 | coding    | 0. 319      | 0     | 1017  | 2602  |
| MSTRG. 22207. 3 | coding    | 0. 338      | 453   | 1551  | 1840  |
| MSTRG. 22207. 7 | coding    | 0. 338      | 375   | 1473  | 1752  |
| MSTRG. 22207. 9 | coding    | 0. 338      | 354   | 1452  | 1731  |
| MSTRG. 22208. 4 | coding    | 0. 233      | 0     | 1686  | 1984  |
| MSTRG. 22211. 5 | coding    | 0. 273      | 738   | 2226  | 2562  |
| MSTRG. 22212. 2 | coding    | 0. 446      | 318   | 2292  | 2577  |
| MSTRG. 22212. 3 | coding    | 0. 444      | 192   | 1974  | 2257  |
| MSTRG. 22213. 4 | coding    | 0. 439      | 297   | 990   | 2745  |
| MSTRG. 22213. 5 | coding    | 0. 439      | 657   | 1350  | 3106  |
| MSTRG. 22213. 2 | coding    | 0. 439      | 1233  | 1926  | 3682  |
| MSTRG. 22213. 3 | coding    | 0. 439      | 828   | 1521  | 3278  |
| MSTRG. 22214. 4 | noncoding | -0. 0393216 | 1761  | 2667  | 3320  |
| MSTRG. 22216. 7 | coding    | 0. 489      | 12    | 2205  | 2605  |
| MSTRG. 22217. 1 | noncoding | -0. 0540672 | 0     | 375   | 1880  |
| MSTRG. 22238. 4 | noncoding | -0. 0712704 | 8868  | 9477  | 9632  |
| MSTRG. 22238. 6 | noncoding | -0. 0004096 | 4509  | 4665  | 9104  |
| MSTRG. 22238. 7 | noncoding | -0. 012288  | 1539  | 1707  | 4116  |
| MSTRG. 22239. 1 | noncoding | -0. 0237568 | 4704  | 4851  | 10653 |
| MSTRG. 22240. 1 | noncoding | -0. 0004096 | 0     | 0     | 1754  |
| MSTRG. 22241. 1 | coding    | 0. 19       | 261   | 1011  | 1271  |
| MSTRG. 22242. 2 | coding    | 0. 514      | 348   | 1266  | 1734  |
| MSTRG. 22242. 3 | coding    | 0. 537      | 18    | 972   | 1351  |
| MSTRG. 22242. 4 | coding    | 0. 513      | 300   | 1176  | 1505  |
| MSTRG. 22245. 2 | coding    | 0. 533      | 0     | 2397  | 2656  |
| MSTRG. 22246. 3 | coding    | 0. 578      | 0     | 2088  | 2296  |
| MSTRG. 22251. 3 | coding    | 0. 438      | 444   | 939   | 1787  |

|                  |           |             |       |       |       |
|------------------|-----------|-------------|-------|-------|-------|
| MSTRG. 22251. 2  | coding    | 0. 482      | 156   | 1437  | 2287  |
| MSTRG. 22251. 4  | coding    | 0. 465      | 72    | 1338  | 2187  |
| MSTRG. 22261. 1  | coding    | 0. 172      | 369   | 1971  | 12174 |
| MSTRG. 22261. 2  | coding    | 0. 425      | 339   | 924   | 3015  |
| MSTRG. 22262. 2  | coding    | 0. 321      | 0     | 228   | 675   |
| MSTRG. 22262. 3  | coding    | 0. 326      | 0     | 315   | 1147  |
| MSTRG. 22262. 4  | coding    | 0. 315      | 0     | 345   | 1858  |
| MSTRG. 22262. 5  | coding    | 0. 325      | 0     | 471   | 670   |
| MSTRG. 22265. 1  | noncoding | -0. 0528384 | 0     | 111   | 398   |
| MSTRG. 22264. 3  | coding    | 0. 571      | 0     | 2085  | 3543  |
| MSTRG. 22264. 4  | coding    | 0. 571      | 258   | 2367  | 3815  |
| MSTRG. 22276. 2  | noncoding | -0. 0344064 | 585   | 1239  | 4046  |
| MSTRG. 22277. 1  | coding    | 0. 429      | 744   | 3834  | 4600  |
| MSTRG. 22277. 3  | coding    | 0. 436      | 1143  | 4110  | 4342  |
| MSTRG. 22277. 10 | coding    | 0. 443      | 0     | 2802  | 3031  |
| MSTRG. 22277. 5  | coding    | 0. 456      | 0     | 2748  | 2977  |
| MSTRG. 22277. 9  | coding    | 0. 423      | 2088  | 5094  | 5325  |
| MSTRG. 22277. 7  | coding    | 0. 435      | 2184  | 5139  | 5369  |
| MSTRG. 22277. 11 | noncoding | -0. 0253952 | 1875  | 2025  | 2179  |
| MSTRG. 22269. 2  | noncoding | -0. 0602112 | 1545  | 2130  | 4455  |
| MSTRG. 22269. 3  | noncoding | -0. 047104  | 63    | 246   | 2672  |
| MSTRG. 22271. 1  | noncoding | -0. 0319488 | 402   | 618   | 870   |
| MSTRG. 22282. 1  | noncoding | -0. 0356352 | 0     | 2412  | 4950  |
| MSTRG. 22282. 2  | noncoding | -0. 0434176 | 9966  | 12240 | 12396 |
| MSTRG. 22282. 3  | noncoding | -0. 0544768 | 9849  | 11595 | 12216 |
| MSTRG. 22283. 3  | coding    | 0. 246      | 456   | 1479  | 9606  |
| MSTRG. 22284. 2  | coding    | 0. 21       | 0     | 3033  | 3507  |
| MSTRG. 22285. 1  | coding    | 0. 271      | 309   | 3897  | 4050  |
| MSTRG. 22286. 3  | coding    | 0. 526      | 126   | 1236  | 2341  |
| MSTRG. 22286. 6  | coding    | 0. 526      | 396   | 1506  | 2412  |
| MSTRG. 22301. 1  | noncoding | -0. 004096  | 228   | 498   | 1076  |
| MSTRG. 22309. 1  | coding    | 0. 27       | 0     | 384   | 562   |
| MSTRG. 22310. 1  | noncoding | -0. 0135168 | 2595  | 2838  | 3687  |
| MSTRG. 22312. 3  | noncoding | -0. 0212992 | 762   | 1119  | 1908  |
| MSTRG. 22312. 2  | noncoding | -0. 0126976 | 786   | 1008  | 1548  |
| MSTRG. 22306. 4  | coding    | 0. 521      | 0     | 447   | 659   |
| MSTRG. 22315. 1  | coding    | 0. 313      | 0     | 264   | 418   |
| MSTRG. 22306. 5  | noncoding | -0. 0565248 | 21    | 213   | 369   |
| MSTRG. 22306. 7  | coding    | 0. 444      | 0     | 618   | 822   |
| MSTRG. 22306. 8  | coding    | 0. 592      | 0     | 258   | 462   |
| MSTRG. 22306. 6  | coding    | 0. 56       | 0     | 294   | 509   |
| MSTRG. 22306. 9  | coding    | 0. 567      | 0     | 300   | 513   |
| MSTRG. 22306. 11 | coding    | 0. 373      | 0     | 360   | 576   |
| MSTRG. 22295. 1  | coding    | 0. 427      | 6     | 2103  | 5088  |
| MSTRG. 22295. 3  | noncoding | -0. 129024  | 0     | 156   | 701   |
| MSTRG. 22299. 3  | coding    | 0. 552      | 0     | 1128  | 1481  |
| MSTRG. 22300. 1  | coding    | 0. 448      | 0     | 399   | 565   |
| MSTRG. 22300. 3  | coding    | 0. 371      | 81    | 624   | 788   |
| MSTRG. 22300. 4  | noncoding | -0. 0876544 | 198   | 438   | 604   |
| MSTRG. 22316. 1  | noncoding | -0. 1335296 | 20550 | 21288 | 22121 |
| MSTRG. 22316. 2  | noncoding | -0. 0380928 | 3243  | 5061  | 8466  |
| MSTRG. 22319. 2  | coding    | 0. 583      | 0     | 546   | 838   |
| MSTRG. 22319. 3  | coding    | 0. 408      | 0     | 888   | 1182  |
| MSTRG. 22332. 7  | coding    | 0. 405      | 5172  | 7728  | 7882  |

|                  |           |             |      |      |      |
|------------------|-----------|-------------|------|------|------|
| MSTRG. 22326. 2  | coding    | 0. 381      | 1143 | 2604 | 2760 |
| MSTRG. 22327. 1  | coding    | 0. 467      | 18   | 1512 | 2399 |
| MSTRG. 22327. 3  | coding    | 0. 558      | 291  | 2331 | 2534 |
| MSTRG. 22325. 1  | noncoding | -0. 0446464 | 0    | 141  | 2684 |
| MSTRG. 22335. 2  | coding    | 0. 523      | 513  | 1497 | 1652 |
| MSTRG. 22335. 3  | coding    | 0. 485      | 0    | 1161 | 1317 |
| MSTRG. 22341. 2  | noncoding | -0. 0303104 | 0    | 678  | 2653 |
| MSTRG. 22341. 3  | noncoding | -0. 0401408 | 462  | 1017 | 4994 |
| MSTRG. 22344. 1  | coding    | 0. 576      | 738  | 1803 | 1956 |
| MSTRG. 22344. 2  | coding    | 0. 522      | 240  | 1464 | 1618 |
| MSTRG. 22344. 4  | coding    | 0. 575      | 492  | 1542 | 1699 |
| MSTRG. 22344. 5  | coding    | 0. 362      | 126  | 1155 | 1322 |
| MSTRG. 22344. 7  | coding    | 0. 369      | 117  | 903  | 1058 |
| MSTRG. 22344. 9  | coding    | 0. 553      | 540  | 1713 | 1869 |
| MSTRG. 22346. 1  | noncoding | -0. 0462848 | 0    | 105  | 261  |
| MSTRG. 22344. 11 | coding    | 0. 284      | 12   | 510  | 665  |
| MSTRG. 22338. 2  | coding    | 0. 293      | 0    | 2601 | 2822 |
| MSTRG. 22338. 4  | noncoding | -0. 0872448 | 1386 | 1686 | 1840 |
| MSTRG. 22340. 2  | noncoding | -0. 032768  | 1401 | 1479 | 1633 |
| MSTRG. 22348. 3  | coding    | 0. 303      | 2643 | 3273 | 6237 |
| MSTRG. 22355. 2  | coding    | 0. 333      | 0    | 492  | 2014 |
| MSTRG. 22356. 1  | coding    | 0. 357      | 942  | 3636 | 3851 |
| MSTRG. 22356. 4  | coding    | 0. 371      | 0    | 2445 | 2659 |
| MSTRG. 22356. 5  | coding    | 0. 296      | 159  | 3681 | 3895 |
| MSTRG. 22356. 3  | coding    | 0. 292      | 942  | 4500 | 4714 |
| MSTRG. 22351. 2  | coding    | 0. 398      | 0    | 2058 | 2214 |
| MSTRG. 22351. 3  | coding    | 0. 51       | 444  | 2025 | 2212 |
| MSTRG. 22358. 2  | noncoding | -0. 0303104 | 0    | 264  | 742  |
| MSTRG. 22359. 2  | coding    | 0. 568      | 0    | 6516 | 6741 |
| MSTRG. 22361. 2  | noncoding | -0. 0913408 | 4782 | 6288 | 6656 |
| MSTRG. 22370. 2  | coding    | 0. 587      | 156  | 2454 | 3217 |
| MSTRG. 22370. 4  | coding    | 0. 572      | 0    | 1758 | 3168 |
| MSTRG. 22378. 3  | coding    | 0. 539      | 855  | 3339 | 4216 |
| MSTRG. 22378. 5  | coding    | 0. 558      | 0    | 2382 | 3258 |
| MSTRG. 22378. 6  | coding    | 0. 534      | 579  | 3051 | 3928 |
| MSTRG. 22378. 7  | coding    | 0. 533      | 2769 | 5271 | 6088 |
| MSTRG. 22367. 3  | noncoding | -0. 217088  | 849  | 2646 | 3286 |
| MSTRG. 22367. 4  | noncoding | -0. 2195456 | 7602 | 9291 | 9929 |
| MSTRG. 22367. 5  | coding    | 0. 216      | 21   | 804  | 5417 |
| MSTRG. 22382. 1  | coding    | 0. 41       | 5463 | 7827 | 9666 |
| MSTRG. 22382. 4  | coding    | 0. 426      | 858  | 2811 | 4302 |
| MSTRG. 22382. 5  | coding    | 0. 449      | 615  | 1953 | 3457 |
| MSTRG. 22382. 8  | coding    | 0. 459      | 483  | 2256 | 3762 |
| MSTRG. 22382. 6  | coding    | 0. 406      | 3822 | 5934 | 7439 |
| MSTRG. 22382. 7  | coding    | 0. 406      | 783  | 2895 | 4401 |
| MSTRG. 22382. 9  | coding    | 0. 406      | 564  | 2676 | 4150 |
| MSTRG. 22383. 1  | coding    | 0. 638      | 69   | 1152 | 1418 |
| MSTRG. 22383. 2  | coding    | 0. 638      | 69   | 1152 | 1418 |
| MSTRG. 22383. 3  | coding    | 0. 638      | 69   | 1152 | 1418 |
| MSTRG. 22383. 4  | coding    | 0. 634      | 69   | 1152 | 1418 |
| MSTRG. 22390. 8  | coding    | 0. 456      | 4581 | 6564 | 7029 |
| MSTRG. 22390. 7  | coding    | 0. 46       | 2862 | 4824 | 5288 |
| MSTRG. 22390. 6  | coding    | 0. 465      | 534  | 3441 | 3904 |
| MSTRG. 22390. 2  | coding    | 0. 462      | 438  | 3558 | 4023 |



|                  |           |             |      |      |      |
|------------------|-----------|-------------|------|------|------|
| MSTRG. 22391. 2  | coding    | 0. 407      | 66   | 558  | 807  |
| MSTRG. 22391. 4  | coding    | 0. 345      | 666  | 1056 | 1305 |
| MSTRG. 22392. 2  | noncoding | -0. 06144   | 2169 | 3771 | 3927 |
| MSTRG. 22392. 4  | noncoding | -0. 0565248 | 183  | 564  | 720  |
| MSTRG. 22394. 2  | noncoding | -0. 065536  | 300  | 621  | 1380 |
| MSTRG. 22394. 3  | coding    | 0. 416      | 639  | 1455 | 1773 |
| MSTRG. 22385. 2  | coding    | 0. 428      | 2484 | 4524 | 5355 |
| MSTRG. 22386. 2  | coding    | 0. 567      | 0    | 1323 | 1702 |
| MSTRG. 22397. 2  | coding    | 0. 445      | 0    | 1605 | 1884 |
| MSTRG. 22397. 3  | coding    | 0. 471      | 0    | 1563 | 1840 |
| MSTRG. 22397. 4  | coding    | 0. 447      | 1008 | 2559 | 2837 |
| MSTRG. 22398. 1  | coding    | 0. 585      | 0    | 981  | 2501 |
| MSTRG. 22399. 1  | coding    | 0. 503      | 0    | 3561 | 3779 |
| MSTRG. 22399. 2  | coding    | 0. 545      | 0    | 3186 | 3342 |
| MSTRG. 22400. 1  | noncoding | -0. 0753664 | 21   | 870  | 1992 |
| MSTRG. 22402. 2  | coding    | 0. 543      | 0    | 480  | 1392 |
| MSTRG. 22402. 3  | coding    | 0. 526      | 0    | 477  | 1152 |
| MSTRG. 22403. 1  | noncoding | -0. 0376832 | 201  | 2679 | 4653 |
| MSTRG. 22406. 2  | coding    | 0. 49       | 0    | 690  | 909  |
| MSTRG. 22406. 5  | coding    | 0. 474      | 0    | 663  | 881  |
| MSTRG. 22411. 2  | coding    | 0. 332      | 0    | 1395 | 2223 |
| MSTRG. 22411. 1  | coding    | 0. 33       | 0    | 1344 | 3130 |
| MSTRG. 22407. 1  | coding    | 0. 509      | 0    | 1512 | 1698 |
| MSTRG. 22407. 2  | coding    | 0. 491      | 354  | 1878 | 2033 |
| MSTRG. 22408. 1  | noncoding | -0. 0356352 | 0    | 1290 | 2032 |
| MSTRG. 22419. 1  | noncoding | -0. 0077824 | 408  | 558  | 993  |
| MSTRG. 22420. 1  | noncoding | -0. 135168  | 2052 | 2115 | 3383 |
| MSTRG. 22417. 1  | noncoding | -0. 069632  | 174  | 237  | 951  |
| MSTRG. 22417. 2  | noncoding | -0. 03072   | 348  | 657  | 1070 |
| MSTRG. 22426. 1  | noncoding | -0. 036864  | 228  | 327  | 565  |
| MSTRG. 22428. 2  | coding    | 0. 412      | 45   | 2850 | 3153 |
| MSTRG. 22430. 2  | coding    | 0. 323      | 2886 | 5154 | 5697 |
| MSTRG. 22435. 2  | coding    | 0. 439      | 138  | 3714 | 4477 |
| MSTRG. 22431. 1  | coding    | 0. 37       | 813  | 1614 | 2398 |
| MSTRG. 22444. 7  | coding    | 0. 437      | 0    | 1314 | 2290 |
| MSTRG. 22444. 5  | coding    | 0. 438      | 0    | 1491 | 2467 |
| MSTRG. 22449. 1  | coding    | 0. 43       | 273  | 3159 | 3572 |
| MSTRG. 22444. 10 | noncoding | -0. 0004096 | 0    | 0    | 310  |
| MSTRG. 22449. 3  | coding    | 0. 43       | 423  | 3309 | 3715 |
| MSTRG. 22449. 4  | coding    | 0. 43       | 468  | 3354 | 3768 |
| MSTRG. 22449. 5  | coding    | 0. 421      | 387  | 3360 | 3772 |
| MSTRG. 22449. 9  | coding    | 0. 421      | 387  | 3360 | 3766 |
| MSTRG. 22449. 10 | coding    | 0. 43       | 336  | 3222 | 3628 |
| MSTRG. 22451. 3  | coding    | 0. 4        | 981  | 3630 | 7948 |
| MSTRG. 22451. 8  | coding    | 0. 363      | 0    | 3126 | 7444 |
| MSTRG. 22451. 5  | coding    | 0. 397      | 9    | 2730 | 7049 |
| MSTRG. 22451. 9  | coding    | 0. 397      | 84   | 2733 | 6987 |
| MSTRG. 22451. 13 | coding    | 0. 408      | 1011 | 1590 | 1759 |
| MSTRG. 22451. 14 | coding    | 0. 397      | 1344 | 3999 | 4168 |
| MSTRG. 22451. 11 | coding    | 0. 397      | 1332 | 3987 | 4157 |
| MSTRG. 22451. 12 | coding    | 0. 399      | 468  | 3171 | 3339 |
| MSTRG. 22442. 1  | noncoding | -0. 12288   | 1698 | 1770 | 2538 |
| MSTRG. 22459. 3  | coding    | 0. 149      | 4485 | 5439 | 6146 |
| MSTRG. 22459. 1  | coding    | 0. 168      | 861  | 2001 | 2707 |

|                  |           |             |      |      |       |
|------------------|-----------|-------------|------|------|-------|
| MSTRG. 22459. 4  | coding    | 0. 177      | 1167 | 2325 | 3032  |
| MSTRG. 22459. 5  | coding    | 0. 168      | 570  | 1710 | 2409  |
| MSTRG. 22459. 6  | coding    | 0. 254      | 300  | 2694 | 3394  |
| MSTRG. 22460. 1  | noncoding | -0. 067584  | 2847 | 3312 | 11914 |
| MSTRG. 22460. 2  | noncoding | -0. 0311296 | 297  | 465  | 1679  |
| MSTRG. 22461. 1  | noncoding | -0. 0458752 | 168  | 420  | 1146  |
| MSTRG. 22461. 2  | noncoding | -0. 0397312 | 36   | 201  | 690   |
| MSTRG. 22461. 4  | noncoding | -0. 0507904 | 168  | 432  | 1772  |
| MSTRG. 22461. 5  | noncoding | -0. 012288  | 129  | 261  | 751   |
| MSTRG. 22461. 6  | noncoding | -0. 0397312 | 435  | 702  | 1412  |
| MSTRG. 22454. 1  | coding    | 0. 366      | 2139 | 2733 | 2889  |
| MSTRG. 22454. 2  | coding    | 0. 352      | 1806 | 2349 | 2503  |
| MSTRG. 22455. 3  | coding    | 0. 58       | 387  | 2397 | 3986  |
| MSTRG. 22464. 1  | noncoding | -0. 090112  | 3612 | 3693 | 12812 |
| MSTRG. 22465. 1  | noncoding | -0. 02048   | 2751 | 2874 | 5777  |
| MSTRG. 22466. 1  | noncoding | -0. 0077824 | 2592 | 2784 | 7100  |
| MSTRG. 22478. 3  | coding    | 0. 137      | 0    | 1755 | 2378  |
| MSTRG. 22478. 2  | coding    | 0. 128      | 0    | 1719 | 5767  |
| MSTRG. 22478. 4  | coding    | 0. 127      | 0    | 1761 | 2821  |
| MSTRG. 22478. 5  | coding    | 0. 129      | 0    | 1719 | 5767  |
| MSTRG. 22478. 7  | coding    | 0. 109      | 366  | 2259 | 6840  |
| MSTRG. 22478. 6  | coding    | 0. 123      | 27   | 1908 | 6604  |
| MSTRG. 22478. 10 | coding    | 0. 123      | 0    | 1881 | 3325  |
| MSTRG. 22478. 11 | coding    | 0. 127      | 0    | 1761 | 2634  |
| MSTRG. 22480. 1  | coding    | 0. 082      | 2706 | 3021 | 3488  |
| MSTRG. 22482. 1  | noncoding | -0. 0004096 | 0    | 0    | 334   |
| MSTRG. 22490. 1  | coding    | 0. 247      | 39   | 933  | 2110  |
| MSTRG. 22490. 2  | coding    | 0. 217      | 39   | 585  | 1010  |
| MSTRG. 22490. 3  | coding    | 0. 231      | 39   | 1038 | 2048  |
| MSTRG. 22490. 4  | coding    | 0. 221      | 39   | 444  | 1534  |
| MSTRG. 22490. 5  | coding    | 0. 204      | 591  | 1323 | 2159  |
| MSTRG. 22490. 6  | coding    | 0. 224      | 327  | 870  | 1706  |
| MSTRG. 22490. 7  | coding    | 0. 231      | 39   | 1257 | 2185  |
| MSTRG. 22490. 9  | coding    | 0. 219      | 30   | 666  | 2022  |
| MSTRG. 22468. 1  | noncoding | -0. 069632  | 9    | 33   | 407   |
| MSTRG. 22469. 1  | noncoding | -0. 01024   | 1911 | 2076 | 2232  |
| MSTRG. 22476. 1  | noncoding | -0. 1081344 | 27   | 66   | 576   |
| MSTRG. 22477. 1  | coding    | 0. 181      | 45   | 1095 | 1250  |
| MSTRG. 22519. 1  | coding    | 0. 498      | 129  | 1758 | 4111  |
| MSTRG. 22521. 1  | noncoding | -0. 008192  | 360  | 495  | 1326  |
| MSTRG. 22517. 1  | noncoding | -0. 055296  | 0    | 186  | 636   |
| MSTRG. 22517. 2  | noncoding | -0. 0897024 | 0    | 717  | 2517  |
| MSTRG. 22517. 3  | noncoding | -0. 0638976 | 1491 | 1644 | 1941  |
| MSTRG. 22524. 1  | noncoding | -0. 16384   | 516  | 579  | 735   |
| MSTRG. 22526. 1  | coding    | 0. 386      | 9    | 1020 | 2172  |
| MSTRG. 22539. 1  | noncoding | -0. 1654784 | 0    | 135  | 371   |
| MSTRG. 22542. 2  | coding    | 0. 445      | 60   | 1773 | 3403  |
| MSTRG. 22544. 1  | noncoding | -0. 0004096 | 180  | 336  | 797   |
| MSTRG. 22544. 2  | noncoding | -0. 0118784 | 180  | 429  | 646   |
| MSTRG. 22528. 1  | noncoding | -0. 032768  | 63   | 159  | 316   |
| MSTRG. 22530. 1  | noncoding | -0. 0126976 | 633  | 1017 | 1252  |
| MSTRG. 22549. 1  | noncoding | -0. 0630784 | 297  | 780  | 4585  |
| MSTRG. 22549. 2  | noncoding | -0. 0581632 | 309  | 786  | 4386  |
| MSTRG. 22551. 3  | noncoding | -0. 045056  | 426  | 477  | 917   |

|                 |           |             |       |       |       |
|-----------------|-----------|-------------|-------|-------|-------|
| MSTRG. 22551. 2 | noncoding | -0. 0360448 | 6     | 594   | 1480  |
| MSTRG. 22551. 4 | noncoding | -0. 0024576 | 378   | 465   | 619   |
| MSTRG. 22551. 5 | noncoding | -0. 1150976 | 0     | 96    | 506   |
| MSTRG. 22552. 2 | coding    | 0. 077      | 90    | 1023  | 1985  |
| MSTRG. 22550. 2 | coding    | 0. 115      | 1263  | 2985  | 5057  |
| MSTRG. 22553. 3 | coding    | 0. 16       | 153   | 1209  | 1791  |
| MSTRG. 22563. 1 | coding    | 0. 45       | 0     | 1890  | 12310 |
| MSTRG. 22563. 3 | noncoding | -0. 0319488 | 2505  | 2721  | 2984  |
| MSTRG. 22564. 3 | coding    | 0. 348      | 366   | 1278  | 2747  |
| MSTRG. 22572. 1 | coding    | 0. 524      | 249   | 4179  | 4616  |
| MSTRG. 22574. 1 | noncoding | -0. 028672  | 2004  | 2340  | 2549  |
| MSTRG. 22572. 2 | coding    | 0. 537      | 0     | 3900  | 5164  |
| MSTRG. 22572. 3 | coding    | 0. 537      | 0     | 3885  | 4384  |
| MSTRG. 22576. 1 | noncoding | -0. 016384  | 75    | 201   | 831   |
| MSTRG. 22580. 1 | noncoding | -0. 024576  | 915   | 1029  | 1281  |
| MSTRG. 22579. 3 | noncoding | -0. 0712704 | 6     | 306   | 686   |
| MSTRG. 22579. 4 | noncoding | -0. 0126976 | 6     | 183   | 669   |
| MSTRG. 22583. 2 | coding    | 0. 287      | 0     | 246   | 692   |
| MSTRG. 22583. 5 | coding    | 0. 287      | 0     | 246   | 811   |
| MSTRG. 22592. 2 | coding    | 0. 556      | 93    | 1653  | 2038  |
| MSTRG. 22592. 3 | coding    | 0. 555      | 93    | 1656  | 2041  |
| MSTRG. 22592. 4 | coding    | 0. 518      | 30    | 1752  | 2137  |
| MSTRG. 22585. 2 | coding    | 0. 338      | 714   | 1050  | 1568  |
| MSTRG. 22585. 1 | coding    | 0. 317      | 6     | 570   | 1099  |
| MSTRG. 22593. 4 | coding    | 0. 366      | 897   | 4269  | 4684  |
| MSTRG. 22598. 2 | coding    | 0. 456      | 0     | 1521  | 1825  |
| MSTRG. 22598. 4 | coding    | 0. 47       | 0     | 1464  | 1705  |
| MSTRG. 22599. 1 | coding    | 0. 292      | 642   | 1368  | 1915  |
| MSTRG. 22599. 2 | coding    | 0. 295      | 120   | 825   | 1370  |
| MSTRG. 22599. 3 | coding    | 0. 29       | 63    | 783   | 1325  |
| MSTRG. 22599. 4 | noncoding | -0. 0393216 | 231   | 471   | 781   |
| MSTRG. 22599. 5 | coding    | 0. 287      | 2796  | 3483  | 4030  |
| MSTRG. 22605. 1 | coding    | 0. 283      | 105   | 1425  | 4860  |
| MSTRG. 22607. 3 | coding    | 0. 584      | 1389  | 1983  | 6754  |
| MSTRG. 22609. 1 | coding    | 0. 322      | 0     | 105   | 2601  |
| MSTRG. 22608. 2 | coding    | 0. 317      | 1689  | 3147  | 5551  |
| MSTRG. 22610. 1 | noncoding | -0. 0602112 | 4809  | 5061  | 5366  |
| MSTRG. 22610. 2 | noncoding | -0. 0712704 | 1128  | 1206  | 4683  |
| MSTRG. 22611. 1 | noncoding | -0. 0131072 | 2778  | 3060  | 3588  |
| MSTRG. 22612. 1 | noncoding | -0. 0479232 | 3135  | 3408  | 6310  |
| MSTRG. 22608. 4 | coding    | 0. 335      | 0     | 1563  | 3968  |
| MSTRG. 22617. 3 | noncoding | -0. 016384  | 612   | 735   | 7384  |
| MSTRG. 22617. 1 | noncoding | -0. 036864  | 87    | 255   | 7612  |
| MSTRG. 22617. 4 | noncoding | -0. 016384  | 615   | 738   | 7251  |
| MSTRG. 22618. 1 | coding    | 0. 262      | 1047  | 1476  | 1776  |
| MSTRG. 22627. 2 | coding    | 0. 569      | 23721 | 27279 | 31057 |
| MSTRG. 22627. 3 | coding    | 0. 569      | 702   | 4224  | 7940  |
| MSTRG. 22627. 4 | coding    | 0. 575      | 81    | 3561  | 7056  |
| MSTRG. 22627. 5 | coding    | 0. 581      | 0     | 3552  | 7180  |
| MSTRG. 22627. 6 | coding    | 0. 499      | 174   | 4341  | 8083  |
| MSTRG. 22627. 7 | coding    | 0. 569      | 78    | 3627  | 7196  |
| MSTRG. 22627. 8 | coding    | 0. 575      | 51    | 3558  | 7298  |
| MSTRG. 22621. 2 | coding    | 0. 207      | 303   | 753   | 1072  |
| MSTRG. 22624. 2 | coding    | 0. 528      | 0     | 1314  | 2179  |

|                 |           |             |      |      |       |
|-----------------|-----------|-------------|------|------|-------|
| MSTRG. 22633. 4 | coding    | 0. 303      | 0    | 1167 | 1606  |
| MSTRG. 22634. 3 | noncoding | -0. 0565248 | 2247 | 3063 | 3279  |
| MSTRG. 22644. 1 | noncoding | -0. 055296  | 267  | 750  | 7457  |
| MSTRG. 22644. 4 | coding    | 0. 146      | 0    | 405  | 780   |
| MSTRG. 22644. 5 | noncoding | -0. 0155648 | 249  | 411  | 786   |
| MSTRG. 22644. 3 | noncoding | -0. 0495616 | 216  | 894  | 1269  |
| MSTRG. 22646. 1 | noncoding | -0. 1241088 | 0    | 309  | 2234  |
| MSTRG. 22646. 2 | noncoding | -0. 1560576 | 0    | 213  | 2636  |
| MSTRG. 22646. 4 | coding    | 0. 082      | 2745 | 2991 | 4578  |
| MSTRG. 22650. 1 | noncoding | -0. 0278528 | 0    | 135  | 674   |
| MSTRG. 22650. 5 | noncoding | -0. 0278528 | 0    | 135  | 885   |
| MSTRG. 22650. 6 | noncoding | -0. 045056  | 948  | 1188 | 1818  |
| MSTRG. 22650. 3 | noncoding | -0. 055296  | 669  | 861  | 1181  |
| MSTRG. 22650. 4 | noncoding | -0. 0454656 | 51   | 453  | 933   |
| MSTRG. 22650. 7 | noncoding | -0. 0352256 | 0    | 378  | 1063  |
| MSTRG. 22639. 2 | coding    | 0. 422      | 69   | 1557 | 1931  |
| MSTRG. 22651. 3 | coding    | 0. 437      | 0    | 1848 | 2311  |
| MSTRG. 22651. 4 | coding    | 0. 261      | 0    | 2967 | 3430  |
| MSTRG. 22651. 5 | coding    | 0. 256      | 0    | 3072 | 3535  |
| MSTRG. 22651. 6 | coding    | 0. 258      | 0    | 3063 | 3526  |
| MSTRG. 22651. 7 | coding    | 0. 26       | 0    | 2976 | 3439  |
| MSTRG. 22654. 1 | noncoding | -0. 0262144 | 9    | 1044 | 1198  |
| MSTRG. 22656. 1 | noncoding | -0. 0208896 | 1458 | 3264 | 7588  |
| MSTRG. 22660. 2 | noncoding | -0. 0299008 | 30   | 1155 | 1926  |
| MSTRG. 22668. 2 | coding    | 0. 384      | 351  | 1806 | 1961  |
| MSTRG. 22664. 1 | coding    | 0. 136      | 0    | 4059 | 4550  |
| MSTRG. 22683. 4 | noncoding | -0. 0872448 | 0    | 1353 | 1592  |
| MSTRG. 22684. 1 | noncoding | -0. 0335872 | 0    | 2181 | 2351  |
| MSTRG. 22686. 2 | coding    | 0. 472      | 522  | 8652 | 9024  |
| MSTRG. 22686. 3 | coding    | 0. 472      | 552  | 8682 | 9052  |
| MSTRG. 22689. 1 | noncoding | -0. 0761856 | 4659 | 5049 | 19557 |
| MSTRG. 22679. 1 | noncoding | -0. 0929792 | 1353 | 2061 | 5395  |
| MSTRG. 22703. 3 | coding    | 0. 508      | 0    | 825  | 1654  |
| MSTRG. 22703. 2 | coding    | 0. 506      | 0    | 840  | 1169  |
| MSTRG. 22709. 2 | coding    | 0. 371      | 636  | 1584 | 1969  |
| MSTRG. 22713. 1 | coding    | 0. 475      | 3387 | 4917 | 5910  |
| MSTRG. 22713. 5 | coding    | 0. 54       | 0    | 1743 | 2735  |
| MSTRG. 22713. 4 | coding    | 0. 54       | 0    | 1734 | 2662  |
| MSTRG. 22714. 1 | noncoding | -0. 0512    | 2382 | 2844 | 2999  |
| MSTRG. 22694. 2 | coding    | 0. 443      | 102  | 1404 | 5430  |
| MSTRG. 22718. 1 | noncoding | -0. 0561152 | 486  | 759  | 3277  |
| MSTRG. 22718. 2 | coding    | 0. 331      | 0    | 360  | 9494  |
| MSTRG. 22718. 3 | noncoding | -0. 045056  | 4662 | 4758 | 4915  |
| MSTRG. 22718. 4 | coding    | 0. 331      | 0    | 360  | 2546  |
| MSTRG. 22721. 1 | noncoding | -0. 057344  | 2217 | 2322 | 4358  |
| MSTRG. 22722. 1 | noncoding | -0. 028672  | 996  | 1104 | 3188  |
| MSTRG. 22725. 1 | noncoding | -0. 0729088 | 774  | 810  | 1044  |
| MSTRG. 22731. 2 | coding    | 0. 481      | 0    | 1554 | 3884  |
| MSTRG. 22733. 1 | coding    | 0. 165      | 84   | 429  | 1276  |
| MSTRG. 22733. 2 | coding    | 0. 001      | 297  | 438  | 1285  |
| MSTRG. 22737. 2 | coding    | 0. 118      | 3462 | 3807 | 5235  |
| MSTRG. 22739. 1 | noncoding | -0. 1355776 | 0    | 21   | 1284  |
| MSTRG. 22740. 1 | noncoding | -0. 1101824 | 792  | 1323 | 1479  |
| MSTRG. 22740. 2 | noncoding | -0. 090112  | 1551 | 2043 | 2199  |

|                 |           |             |      |      |       |
|-----------------|-----------|-------------|------|------|-------|
| MSTRG. 22740. 4 | coding    | 0. 095      | 456  | 936  | 1212  |
| MSTRG. 22742. 1 | coding    | 0. 108      | 324  | 2589 | 3386  |
| MSTRG. 22742. 2 | coding    | 0. 088      | 165  | 1458 | 4054  |
| MSTRG. 22744. 2 | coding    | 0. 249      | 171  | 3738 | 4964  |
| MSTRG. 22744. 3 | coding    | 0. 247      | 2505 | 3972 | 5198  |
| MSTRG. 22744. 5 | coding    | 0. 245      | 3330 | 5223 | 6019  |
| MSTRG. 22744. 4 | coding    | 0. 255      | 183  | 3807 | 5019  |
| MSTRG. 22744. 6 | coding    | 0. 234      | 174  | 2649 | 4956  |
| MSTRG. 22744. 8 | coding    | 0. 242      | 183  | 1164 | 3401  |
| MSTRG. 22746. 1 | coding    | 0. 269      | 18   | 3690 | 4818  |
| MSTRG. 22747. 1 | coding    | 0. 201      | 0    | 948  | 1287  |
| MSTRG. 22747. 3 | coding    | 0. 497      | 0    | 351  | 6294  |
| MSTRG. 22747. 4 | coding    | 0. 233      | 0    | 2730 | 3031  |
| MSTRG. 22749. 4 | noncoding | -0. 096256  | 0    | 237  | 6263  |
| MSTRG. 22750. 5 | coding    | 0. 681      | 0    | 159  | 2168  |
| MSTRG. 22755. 1 | noncoding | -0. 045056  | 0    | 111  | 693   |
| MSTRG. 22763. 2 | coding    | 0. 214      | 24   | 2001 | 2472  |
| MSTRG. 22763. 4 | coding    | 0. 229      | 0    | 1917 | 2354  |
| MSTRG. 22763. 5 | coding    | 0. 199      | 0    | 1788 | 2226  |
| MSTRG. 22763. 6 | coding    | 0. 257      | 0    | 1827 | 2259  |
| MSTRG. 22764. 1 | coding    | 0. 184      | 0    | 1827 | 3322  |
| MSTRG. 22764. 3 | coding    | 0. 124      | 216  | 1614 | 2221  |
| MSTRG. 22770. 2 | coding    | 0. 05       | 534  | 2886 | 7626  |
| MSTRG. 22774. 1 | noncoding | -0. 0004096 | 0    | 0    | 379   |
| MSTRG. 22776. 1 | coding    | 0. 118      | 174  | 273  | 468   |
| MSTRG. 22779. 1 | noncoding | -0. 073728  | 264  | 321  | 627   |
| MSTRG. 22780. 1 | noncoding | -0. 036864  | 354  | 405  | 575   |
| MSTRG. 22790. 3 | coding    | 0. 077      | 3486 | 8997 | 9246  |
| MSTRG. 22790. 4 | coding    | 0. 06       | 1659 | 8733 | 10855 |
| MSTRG. 22790. 5 | coding    | 0. 073      | 3336 | 8799 | 10917 |
| MSTRG. 22793. 1 | noncoding | -0. 0073728 | 327  | 369  | 1416  |
| MSTRG. 22798. 3 | coding    | 0. 108      | 9    | 2451 | 4261  |
| MSTRG. 22800. 5 | coding    | 0. 143      | 708  | 1461 | 2303  |
| MSTRG. 22800. 3 | coding    | 0. 143      | 327  | 1080 | 1920  |
| MSTRG. 22784. 1 | coding    | 0. 134      | 138  | 3822 | 4548  |
| MSTRG. 22785. 4 | coding    | 0. 228      | 1668 | 3027 | 8211  |
| MSTRG. 22785. 5 | coding    | 0. 276      | 0    | 1056 | 3888  |
| MSTRG. 22785. 6 | noncoding | -0. 0057344 | 4161 | 4548 | 11797 |
| MSTRG. 22786. 1 | noncoding | -0. 069632  | 153  | 198  | 890   |
| MSTRG. 22787. 1 | noncoding | -0. 0032768 | 2256 | 2313 | 2532  |
| MSTRG. 22789. 2 | coding    | 0. 33       | 732  | 1158 | 1386  |
| MSTRG. 22803. 1 | noncoding | -0. 016384  | 102  | 237  | 454   |
| MSTRG. 22804. 1 | coding    | 0. 277      | 0    | 1311 | 1466  |
| MSTRG. 22804. 3 | coding    | 0. 228      | 0    | 1695 | 1848  |
| MSTRG. 22804. 4 | coding    | 0. 228      | 0    | 1698 | 1851  |
| MSTRG. 22806. 2 | noncoding | -0. 0987136 | 0    | 108  | 318   |
| MSTRG. 22811. 1 | coding    | 0. 265      | 0    | 2133 | 3664  |
| MSTRG. 22812. 3 | coding    | 0. 503      | 654  | 1878 | 7447  |
| MSTRG. 22813. 1 | noncoding | -0. 0331776 | 5280 | 5973 | 8471  |
| MSTRG. 22814. 2 | coding    | 0. 265      | 261  | 2949 | 3102  |
| MSTRG. 22818. 2 | coding    | 0. 349      | 171  | 2541 | 2843  |
| MSTRG. 22819. 2 | coding    | 0. 231      | 0    | 1383 | 1726  |
| MSTRG. 22819. 1 | coding    | 0. 231      | 0    | 1386 | 4231  |
| MSTRG. 22822. 2 | coding    | 0. 397      | 279  | 597  | 967   |

|                  |           |             |      |      |      |
|------------------|-----------|-------------|------|------|------|
| MSTRG. 22822. 3  | coding    | 0. 43       | 48   | 426  | 740  |
| MSTRG. 22825. 1  | coding    | 0. 288      | 153  | 912  | 3094 |
| MSTRG. 22825. 7  | coding    | 0. 215      | 714  | 1119 | 1739 |
| MSTRG. 22825. 5  | coding    | 0. 288      | 252  | 1011 | 1632 |
| MSTRG. 22825. 6  | coding    | 0. 288      | 150  | 909  | 1531 |
| MSTRG. 22827. 1  | noncoding | -0. 0196608 | 1386 | 1422 | 1971 |
| MSTRG. 22829. 3  | coding    | 0. 156      | 351  | 615  | 1652 |
| MSTRG. 22829. 4  | coding    | 0. 156      | 792  | 1056 | 2093 |
| MSTRG. 22829. 2  | coding    | 0. 165      | 537  | 909  | 4336 |
| MSTRG. 22824. 1  | coding    | 0. 241      | 171  | 1692 | 3760 |
| MSTRG. 22832. 5  | coding    | 0. 273      | 81   | 651  | 1318 |
| MSTRG. 22832. 6  | coding    | 0. 275      | 684  | 1575 | 2243 |
| MSTRG. 22832. 4  | coding    | 0. 274      | 435  | 1332 | 1998 |
| MSTRG. 22833. 2  | coding    | 0. 38       | 507  | 1302 | 2074 |
| MSTRG. 22833. 3  | coding    | 0. 373      | 9    | 801  | 1572 |
| MSTRG. 22841. 2  | coding    | 0. 469      | 516  | 2532 | 2909 |
| MSTRG. 22841. 3  | coding    | 0. 469      | 510  | 2526 | 5537 |
| MSTRG. 22842. 8  | coding    | 0. 604      | 666  | 2892 | 3683 |
| MSTRG. 22842. 9  | coding    | 0. 579      | 249  | 2754 | 3564 |
| MSTRG. 22842. 10 | coding    | 0. 547      | 60   | 2829 | 3621 |
| MSTRG. 22842. 12 | coding    | 0. 584      | 210  | 2832 | 3591 |
| MSTRG. 22842. 13 | coding    | 0. 567      | 75   | 2865 | 3555 |
| MSTRG. 22835. 1  | coding    | 0. 364      | 309  | 2166 | 3887 |
| MSTRG. 22835. 2  | coding    | 0. 378      | 120  | 2205 | 3234 |
| MSTRG. 22836. 1  | noncoding | -0. 057344  | 693  | 1167 | 2432 |
| MSTRG. 22838. 4  | coding    | 0. 337      | 42   | 600  | 849  |
| MSTRG. 22838. 5  | coding    | 0. 353      | 0    | 585  | 832  |
| MSTRG. 22838. 3  | coding    | 0. 359      | 15   | 606  | 1124 |
| MSTRG. 22838. 2  | coding    | 0. 384      | 15   | 750  | 1225 |
| MSTRG. 22845. 2  | coding    | 0. 22       | 171  | 945  | 5496 |
| MSTRG. 22847. 3  | coding    | 0. 203      | 141  | 1443 | 1633 |
| MSTRG. 22857. 1  | coding    | 0. 381      | 0    | 1314 | 2219 |
| MSTRG. 22857. 2  | coding    | 0. 541      | 0    | 597  | 2029 |
| MSTRG. 22858. 3  | coding    | 0. 113      | 243  | 7152 | 7688 |
| MSTRG. 22858. 5  | coding    | 0. 113      | 348  | 7260 | 7797 |
| MSTRG. 22858. 6  | coding    | 0. 113      | 348  | 7254 | 7791 |
| MSTRG. 22858. 7  | coding    | 0. 113      | 348  | 7257 | 7794 |
| MSTRG. 22858. 8  | coding    | 0. 113      | 288  | 7191 | 7727 |
| MSTRG. 22858. 10 | coding    | 0. 113      | 435  | 7359 | 7897 |
| MSTRG. 22858. 4  | coding    | 0. 113      | 297  | 7188 | 7724 |
| MSTRG. 22858. 9  | coding    | 0. 113      | 438  | 7347 | 7883 |
| MSTRG. 22867. 1  | coding    | 0. 236      | 798  | 2997 | 3852 |
| MSTRG. 22871. 1  | noncoding | -0. 053248  | 225  | 285  | 1344 |
| MSTRG. 22871. 2  | noncoding | -0. 028672  | 336  | 369  | 744  |
| MSTRG. 22881. 2  | coding    | 0. 353      | 504  | 2817 | 3571 |
| MSTRG. 22881. 3  | coding    | 0. 306      | 390  | 2076 | 2628 |
| MSTRG. 22892. 2  | coding    | 0. 336      | 0    | 783  | 2611 |
| MSTRG. 22892. 4  | coding    | 0. 336      | 0    | 783  | 2551 |
| MSTRG. 22892. 5  | noncoding | -0. 0999424 | 0    | 198  | 870  |
| MSTRG. 22893. 1  | coding    | 0. 115      | 0    | 237  | 453  |
| MSTRG. 22895. 2  | coding    | 0. 163      | 63   | 588  | 863  |
| MSTRG. 22896. 1  | coding    | 0. 03       | 1179 | 1887 | 4217 |
| MSTRG. 22896. 4  | coding    | 0. 03       | 1179 | 1887 | 2800 |
| MSTRG. 22898. 2  | coding    | 0. 081      | 0    | 1821 | 2131 |

|                 |           |             |      |      |      |
|-----------------|-----------|-------------|------|------|------|
| MSTRG. 22899. 1 | coding    | 0. 371      | 0    | 915  | 1451 |
| MSTRG. 22909. 2 | coding    | 0. 219      | 384  | 1077 | 1281 |
| MSTRG. 22911. 3 | coding    | 0. 46       | 564  | 1941 | 2095 |
| MSTRG. 22912. 1 | noncoding | -0. 0507904 | 579  | 1485 | 2392 |
| MSTRG. 22913. 2 | coding    | 0. 404      | 0    | 1860 | 2030 |
| MSTRG. 22914. 3 | coding    | 0. 218      | 246  | 1458 | 1951 |
| MSTRG. 22919. 1 | coding    | 0. 316      | 159  | 3741 | 4509 |
| MSTRG. 22921. 1 | noncoding | -0. 0004096 | 0    | 0    | 405  |
| MSTRG. 22922. 1 | coding    | 0. 1        | 186  | 2280 | 3623 |
| MSTRG. 22922. 3 | coding    | 0. 107      | 120  | 2037 | 3609 |
| MSTRG. 22924. 1 | coding    | 0. 304      | 0    | 1287 | 2071 |
| MSTRG. 22922. 6 | noncoding | -0. 0638976 | 1266 | 1605 | 1776 |
| MSTRG. 22924. 3 | coding    | 0. 306      | 5286 | 5826 | 5981 |
| MSTRG. 22924. 2 | coding    | 0. 287      | 387  | 1413 | 1566 |
| MSTRG. 22928. 2 | coding    | 0. 305      | 243  | 4320 | 4662 |
| MSTRG. 22931. 5 | coding    | 0. 213      | 1110 | 3273 | 4633 |
| MSTRG. 22931. 6 | coding    | 0. 213      | 618  | 2775 | 4135 |
| MSTRG. 22933. 1 | coding    | 0. 264      | 855  | 2313 | 2563 |
| MSTRG. 22935. 1 | coding    | 0. 469      | 0    | 852  | 1199 |
| MSTRG. 22936. 1 | coding    | 0. 271      | 39   | 963  | 2193 |
| MSTRG. 22937. 2 | coding    | 0. 455      | 465  | 1638 | 2344 |
| MSTRG. 22937. 3 | coding    | 0. 455      | 606  | 1779 | 2485 |
| MSTRG. 22941. 4 | coding    | 0. 448      | 474  | 2313 | 2468 |
| MSTRG. 22943. 1 | coding    | 0. 426      | 102  | 1083 | 1652 |
| MSTRG. 22944. 2 | coding    | 0. 195      | 246  | 519  | 1028 |
| MSTRG. 22925. 3 | coding    | 0. 413      | 69   | 4218 | 4696 |
| MSTRG. 22946. 1 | coding    | 0. 331      | 528  | 1029 | 1315 |
| MSTRG. 22946. 4 | coding    | 0. 312      | 423  | 873  | 1029 |
| MSTRG. 22947. 2 | coding    | 0. 268      | 273  | 993  | 1149 |
| MSTRG. 22948. 3 | coding    | 0. 457      | 1566 | 4680 | 5229 |
| MSTRG. 22948. 4 | coding    | 0. 454      | 1416 | 4620 | 5167 |
| MSTRG. 22948. 2 | coding    | 0. 461      | 702  | 3831 | 4379 |
| MSTRG. 22948. 5 | coding    | 0. 396      | 0    | 3786 | 4333 |
| MSTRG. 22951. 1 | coding    | 0. 268      | 189  | 2493 | 2854 |
| MSTRG. 22951. 2 | coding    | 0. 388      | 507  | 1968 | 2329 |
| MSTRG. 22953. 1 | coding    | 0. 154      | 504  | 828  | 5027 |
| MSTRG. 22953. 2 | noncoding | -0. 1232896 | 4101 | 4422 | 4577 |
| MSTRG. 22953. 8 | coding    | 0. 119      | 2964 | 3177 | 4303 |
| MSTRG. 22953. 4 | coding    | 0. 154      | 2157 | 2481 | 5634 |
| MSTRG. 22953. 5 | coding    | 0. 154      | 2157 | 2481 | 4164 |
| MSTRG. 22953. 6 | coding    | 0. 202      | 2298 | 2583 | 5738 |
| MSTRG. 22953. 7 | coding    | 0. 202      | 2298 | 2583 | 4496 |
| MSTRG. 22953. 3 | coding    | 0. 154      | 834  | 1158 | 3978 |
| MSTRG. 22954. 1 | noncoding | -0. 0282624 | 1113 | 1191 | 2633 |
| MSTRG. 22955. 1 | noncoding | -0. 1523712 | 0    | 12   | 206  |
| MSTRG. 22965. 3 | noncoding | -0. 0811008 | 0    | 315  | 1795 |
| MSTRG. 22965. 5 | noncoding | -0. 0811008 | 0    | 315  | 1361 |
| MSTRG. 22965. 4 | coding    | 0. 423      | 483  | 2922 | 3586 |
| MSTRG. 22965. 6 | coding    | 0. 421      | 528  | 3024 | 3693 |
| MSTRG. 22965. 8 | coding    | 0. 016      | 159  | 816  | 2424 |
| MSTRG. 22976. 4 | noncoding | -0. 0774144 | 564  | 2124 | 2661 |
| MSTRG. 22977. 2 | coding    | 0. 18       | 444  | 2412 | 2600 |
| MSTRG. 22979. 2 | coding    | 0. 543      | 0    | 747  | 8403 |
| MSTRG. 22979. 3 | coding    | 0. 245      | 114  | 1347 | 8366 |

|                  |           |             |       |       |       |
|------------------|-----------|-------------|-------|-------|-------|
| MSTRG. 22983. 2  | coding    | 0. 339      | 597   | 1917  | 2134  |
| MSTRG. 22984. 5  | coding    | 0. 31       | 0     | 420   | 1216  |
| MSTRG. 22984. 1  | coding    | 0. 266      | 0     | 528   | 2952  |
| MSTRG. 22984. 3  | coding    | 0. 266      | 0     | 528   | 2437  |
| MSTRG. 22984. 4  | coding    | 0. 33       | 0     | 336   | 1985  |
| MSTRG. 22985. 2  | coding    | 0. 139      | 468   | 1059  | 1345  |
| MSTRG. 22986. 3  | coding    | 0. 307      | 0     | 1149  | 3101  |
| MSTRG. 22986. 4  | coding    | 0. 307      | 0     | 1149  | 2409  |
| MSTRG. 22986. 5  | coding    | 0. 283      | 0     | 1257  | 5029  |
| MSTRG. 22966. 6  | coding    | 0. 188      | 0     | 750   | 5003  |
| MSTRG. 22966. 2  | coding    | 0. 149      | 339   | 1116  | 12573 |
| MSTRG. 22966. 3  | coding    | 0. 149      | 393   | 1170  | 12627 |
| MSTRG. 22966. 4  | noncoding | -0. 0561152 | 393   | 864   | 12756 |
| MSTRG. 22966. 5  | noncoding | -0. 0385024 | 8013  | 8244  | 8773  |
| MSTRG. 22967. 1  | noncoding | -0. 069632  | 366   | 390   | 2020  |
| MSTRG. 22968. 1  | noncoding | -0. 04096   | 3504  | 3588  | 6882  |
| MSTRG. 22967. 2  | noncoding | -0. 0352256 | 2070  | 2214  | 4548  |
| MSTRG. 22966. 7  | coding    | 0. 149      | 5322  | 6099  | 17554 |
| MSTRG. 22966. 8  | coding    | 0. 142      | 93    | 900   | 12354 |
| MSTRG. 22966. 9  | coding    | 0. 027      | 2691  | 4266  | 4935  |
| MSTRG. 22966. 10 | coding    | 0. 027      | 8994  | 10569 | 15585 |
| MSTRG. 22972. 1  | coding    | 0. 329      | 357   | 1737  | 2208  |
| MSTRG. 23003. 1  | noncoding | -0. 073728  | 0     | 96    | 263   |
| MSTRG. 23003. 2  | noncoding | -0. 008192  | 18    | 54    | 481   |
| MSTRG. 23003. 3  | noncoding | -0. 008192  | 6     | 42    | 544   |
| MSTRG. 23015. 1  | coding    | 0. 377      | 837   | 12318 | 16415 |
| MSTRG. 23015. 2  | coding    | 0. 378      | 357   | 11991 | 16088 |
| MSTRG. 23016. 1  | noncoding | -0. 0045056 | 1740  | 1896  | 2120  |
| MSTRG. 23015. 3  | coding    | 0. 378      | 21    | 11613 | 15709 |
| MSTRG. 23017. 1  | noncoding | -0. 08192   | 3909  | 4002  | 6471  |
| MSTRG. 23018. 1  | noncoding | -0. 0503808 | 2178  | 2394  | 4647  |
| MSTRG. 23006. 1  | noncoding | -0. 077824  | 192   | 225   | 462   |
| MSTRG. 23007. 1  | coding    | 0. 367      | 597   | 3564  | 3959  |
| MSTRG. 23007. 3  | coding    | 0. 362      | 405   | 3360  | 3757  |
| MSTRG. 23009. 1  | noncoding | -0. 0397312 | 132   | 396   | 2242  |
| MSTRG. 23009. 2  | coding    | 0. 051      | 387   | 705   | 2278  |
| MSTRG. 23009. 3  | noncoding | -0. 0397312 | 132   | 396   | 2221  |
| MSTRG. 23049. 1  | coding    | 0. 151      | 0     | 312   | 468   |
| MSTRG. 23050. 1  | noncoding | -0. 053248  | 231   | 285   | 1238  |
| MSTRG. 23048. 5  | coding    | 0. 229      | 147   | 1089  | 2198  |
| MSTRG. 23048. 4  | coding    | 0. 221      | 297   | 1224  | 2335  |
| MSTRG. 23048. 6  | coding    | 0. 223      | 336   | 1236  | 2346  |
| MSTRG. 23052. 2  | coding    | 0. 239      | 0     | 1845  | 3211  |
| MSTRG. 23055. 1  | coding    | 0. 111      | 81    | 2544  | 3858  |
| MSTRG. 23055. 5  | coding    | 0. 115      | 333   | 2811  | 4124  |
| MSTRG. 23054. 3  | coding    | 0. 194      | 744   | 2889  | 3536  |
| MSTRG. 23057. 1  | noncoding | -0. 0987136 | 39    | 528   | 753   |
| MSTRG. 23058. 1  | noncoding | -0. 077824  | 375   | 441   | 1327  |
| MSTRG. 23061. 1  | coding    | 0. 037      | 4749  | 5667  | 8759  |
| MSTRG. 23061. 2  | noncoding | -0. 028672  | 975   | 1098  | 1253  |
| MSTRG. 23071. 1  | coding    | 0. 203      | 720   | 1956  | 2310  |
| MSTRG. 23080. 2  | noncoding | -0. 0692224 | 14715 | 15279 | 16432 |
| MSTRG. 23080. 1  | noncoding | -0. 0692224 | 219   | 783   | 1751  |
| MSTRG. 23082. 1  | coding    | 0. 346      | 7641  | 15459 | 15613 |



|                 |           |             |      |       |       |
|-----------------|-----------|-------------|------|-------|-------|
| MSTRG. 23082. 2 | coding    | 0. 154      | 561  | 1530  | 1736  |
| MSTRG. 23082. 3 | coding    | 0. 346      | 7395 | 15213 | 15368 |
| MSTRG. 23082. 4 | coding    | 0. 346      | 7326 | 15144 | 15297 |
| MSTRG. 23084. 1 | noncoding | -0. 1609728 | 162  | 177   | 646   |
| MSTRG. 23072. 2 | noncoding | -0. 043008  | 237  | 561   | 1049  |
| MSTRG. 23074. 1 | coding    | 0. 116      | 183  | 1374  | 2329  |
| MSTRG. 23074. 2 | coding    | 0. 115      | 0    | 1281  | 2234  |
| MSTRG. 23075. 1 | noncoding | -0. 008192  | 276  | 567   | 5174  |
| MSTRG. 23076. 1 | noncoding | -0. 14336   | 603  | 615   | 1567  |
| MSTRG. 23087. 3 | coding    | 0. 452      | 918  | 4728  | 13173 |
| MSTRG. 23079. 2 | coding    | 0. 506      | 225  | 3393  | 5101  |
| MSTRG. 23089. 2 | noncoding | -0. 0053248 | 297  | 309   | 699   |
| MSTRG. 23089. 1 | noncoding | -0. 0053248 | 312  | 324   | 788   |
| MSTRG. 23094. 2 | coding    | 0. 297      | 1932 | 2283  | 6199  |
| MSTRG. 23094. 4 | noncoding | -0. 018432  | 4434 | 4602  | 9437  |
| MSTRG. 23094. 5 | coding    | 0. 314      | 807  | 1233  | 5150  |
| MSTRG. 23094. 6 | coding    | 0. 314      | 4044 | 4470  | 8386  |
| MSTRG. 23101. 1 | coding    | 0. 066      | 0    | 4221  | 6485  |
| MSTRG. 23101. 2 | coding    | 0. 059      | 0    | 4185  | 6396  |
| MSTRG. 23106. 3 | coding    | 0. 202      | 408  | 2526  | 2753  |
| MSTRG. 23106. 4 | coding    | 0. 202      | 498  | 2613  | 2840  |
| MSTRG. 23106. 5 | coding    | 0. 204      | 132  | 2250  | 2476  |
| MSTRG. 23108. 1 | coding    | 0. 34       | 0    | 2109  | 3292  |
| MSTRG. 23105. 2 | coding    | 0. 29       | 726  | 1077  | 3726  |
| MSTRG. 23110. 2 | coding    | 0. 545      | 0    | 1473  | 1963  |
| MSTRG. 23110. 3 | coding    | 0. 466      | 0    | 1824  | 2313  |
| MSTRG. 23122. 1 | coding    | 0. 324      | 0    | 2133  | 2531  |
| MSTRG. 23122. 2 | coding    | 0. 359      | 90   | 1938  | 2335  |
| MSTRG. 23122. 3 | coding    | 0. 389      | 393  | 1908  | 2306  |
| MSTRG. 23127. 1 | noncoding | -0. 012288  | 1113 | 1233  | 1808  |
| MSTRG. 23127. 2 | noncoding | -0. 012288  | 8556 | 8676  | 9165  |
| MSTRG. 23128. 1 | coding    | 0. 014      | 96   | 285   | 593   |
| MSTRG. 23130. 1 | noncoding | -0. 1314816 | 0    | 153   | 1536  |
| MSTRG. 23134. 1 | noncoding | -0. 0692224 | 1701 | 2049  | 5258  |
| MSTRG. 23139. 2 | coding    | 0. 093      | 246  | 2352  | 2505  |
| MSTRG. 23139. 4 | coding    | 0. 151      | 246  | 450   | 832   |
| MSTRG. 23139. 5 | coding    | 0. 13       | 246  | 594   | 850   |
| MSTRG. 23139. 6 | coding    | 0. 176      | 0    | 213   | 539   |
| MSTRG. 23139. 7 | coding    | 0. 124      | 87   | 309   | 726   |
| MSTRG. 23142. 2 | noncoding | -0. 0577536 | 4518 | 4755  | 5569  |
| MSTRG. 23142. 1 | noncoding | -0. 0577536 | 4524 | 4761  | 5364  |
| MSTRG. 23145. 1 | coding    | 0. 045      | 1038 | 1203  | 5297  |
| MSTRG. 23145. 2 | noncoding | -0. 032768  | 2619 | 3036  | 4683  |
| MSTRG. 23146. 1 | coding    | 0. 098      | 1575 | 1932  | 2085  |
| MSTRG. 23153. 2 | coding    | 0. 428      | 12   | 2457  | 2741  |
| MSTRG. 23153. 3 | coding    | 0. 434      | 0    | 2391  | 2675  |
| MSTRG. 23150. 2 | coding    | 0. 44       | 0    | 909   | 1645  |
| MSTRG. 23151. 1 | noncoding | -0. 004096  | 582  | 687   | 843   |
| MSTRG. 23154. 1 | coding    | 0. 187      | 231  | 507   | 796   |
| MSTRG. 23159. 3 | coding    | 0. 175      | 6    | 594   | 1341  |
| MSTRG. 23160. 1 | coding    | 0. 342      | 156  | 1830  | 2058  |
| MSTRG. 23158. 1 | noncoding | -0. 047104  | 237  | 471   | 626   |
| MSTRG. 23158. 2 | noncoding | -0. 0503808 | 180  | 381   | 536   |
| MSTRG. 23166. 1 | noncoding | -0. 0823296 | 0    | 279   | 503   |

|                 |           |             |      |      |       |
|-----------------|-----------|-------------|------|------|-------|
| MSTRG. 23169. 1 | noncoding | -0. 0651264 | 183  | 852  | 1174  |
| MSTRG. 23173. 1 | noncoding | -0. 0311296 | 0    | 186  | 350   |
| MSTRG. 23175. 1 | coding    | 0. 127      | 366  | 546  | 765   |
| MSTRG. 23175. 2 | coding    | 0. 127      | 240  | 420  | 663   |
| MSTRG. 23174. 1 | coding    | 0. 137      | 45   | 201  | 383   |
| MSTRG. 23178. 1 | noncoding | -0. 088064  | 468  | 1353 | 1510  |
| MSTRG. 23182. 1 | coding    | 0. 375      | 39   | 942  | 1505  |
| MSTRG. 23187. 1 | noncoding | -0. 0262144 | 750  | 954  | 1366  |
| MSTRG. 23188. 1 | noncoding | -0. 065536  | 441  | 864  | 1783  |
| MSTRG. 23188. 2 | noncoding | -0. 065536  | 75   | 498  | 6252  |
| MSTRG. 23188. 4 | noncoding | -0. 065536  | 75   | 498  | 6180  |
| MSTRG. 23188. 3 | noncoding | -0. 065536  | 441  | 864  | 1371  |
| MSTRG. 23189. 2 | coding    | 0. 326      | 0    | 7089 | 10301 |
| MSTRG. 23191. 3 | coding    | 0. 333      | 81   | 612  | 902   |
| MSTRG. 23191. 4 | coding    | 0. 346      | 312  | 897  | 1187  |
| MSTRG. 23191. 2 | coding    | 0. 291      | 183  | 927  | 1218  |
| MSTRG. 23192. 4 | noncoding | -0. 0356352 | 99   | 333  | 507   |
| MSTRG. 23186. 2 | coding    | 0. 234      | 1314 | 3162 | 3319  |
| MSTRG. 23194. 1 | coding    | 0. 307      | 0    | 3744 | 4284  |
| MSTRG. 23194. 2 | coding    | 0. 308      | 0    | 3747 | 4287  |
| MSTRG. 23195. 3 | coding    | 0. 342      | 408  | 1920 | 2075  |
| MSTRG. 23195. 4 | coding    | 0. 345      | 408  | 2076 | 2231  |
| MSTRG. 23195. 2 | coding    | 0. 342      | 144  | 1656 | 1813  |
| MSTRG. 23195. 1 | coding    | 0. 345      | 462  | 2130 | 2286  |
| MSTRG. 23196. 1 | noncoding | -0. 008192  | 9    | 153  | 1571  |
| MSTRG. 23193. 1 | coding    | 0. 425      | 0    | 1980 | 2408  |
| MSTRG. 23197. 2 | noncoding | -0. 1150976 | 0    | 489  | 643   |
| MSTRG. 23202. 1 | coding    | 0. 345      | 15   | 765  | 976   |
| MSTRG. 23204. 3 | coding    | 0. 412      | 303  | 4821 | 4980  |
| MSTRG. 23201. 2 | coding    | 0. 513      | 0    | 501  | 860   |
| MSTRG. 23207. 1 | coding    | 0. 335      | 666  | 1611 | 2004  |
| MSTRG. 23207. 4 | coding    | 0. 283      | 114  | 879  | 1273  |
| MSTRG. 23212. 1 | noncoding | -0. 034816  | 243  | 387  | 1018  |
| MSTRG. 23213. 1 | coding    | 0. 001      | 717  | 1338 | 1960  |
| MSTRG. 23221. 3 | coding    | 0. 114      | 240  | 1482 | 2426  |
| MSTRG. 23221. 2 | coding    | 0. 101      | 69   | 1311 | 6786  |
| MSTRG. 23222. 1 | noncoding | -0. 02048   | 156  | 360  | 551   |
| MSTRG. 23223. 1 | noncoding | -0. 034816  | 3252 | 3570 | 3927  |
| MSTRG. 23223. 2 | coding    | 0. 046      | 522  | 1332 | 2521  |
| MSTRG. 23223. 3 | coding    | 0. 046      | 1005 | 1815 | 3804  |
| MSTRG. 23223. 4 | coding    | 0. 046      | 309  | 1119 | 3116  |
| MSTRG. 23224. 1 | noncoding | -0. 0372736 | 117  | 345  | 1216  |
| MSTRG. 23234. 1 | noncoding | -0. 0401408 | 3    | 258  | 1322  |
| MSTRG. 23237. 1 | coding    | 0. 062      | 2322 | 2958 | 8447  |
| MSTRG. 23237. 3 | coding    | 0. 062      | 1941 | 2577 | 7903  |
| MSTRG. 23239. 1 | coding    | 0. 027      | 192  | 1590 | 1810  |
| MSTRG. 23241. 1 | noncoding | -0. 0385024 | 750  | 1317 | 5886  |
| MSTRG. 23253. 1 | noncoding | -0. 0565248 | 2391 | 3246 | 4975  |
| MSTRG. 23255. 2 | coding    | 0. 449      | 0    | 6264 | 8311  |
| MSTRG. 23255. 4 | coding    | 0. 495      | 1599 | 7104 | 9080  |
| MSTRG. 23255. 5 | coding    | 0. 495      | 411  | 5913 | 7961  |
| MSTRG. 23255. 6 | coding    | 0. 43       | 0    | 4215 | 4746  |
| MSTRG. 23257. 1 | noncoding | -0. 034816  | 2076 | 2226 | 2827  |
| MSTRG. 23255. 7 | coding    | 0. 338      | 1023 | 3717 | 4247  |

|                  |           |             |      |      |       |
|------------------|-----------|-------------|------|------|-------|
| MSTRG. 23255. 8  | coding    | 0. 408      | 381  | 2031 | 2768  |
| MSTRG. 23265. 1  | coding    | 0. 468      | 87   | 2376 | 3280  |
| MSTRG. 23265. 2  | coding    | 0. 464      | 84   | 2859 | 3016  |
| MSTRG. 23265. 3  | coding    | 0. 396      | 75   | 1125 | 1662  |
| MSTRG. 23265. 12 | coding    | 0. 468      | 156  | 2445 | 3072  |
| MSTRG. 23265. 11 | coding    | 0. 394      | 51   | 3312 | 3468  |
| MSTRG. 23265. 13 | coding    | 0. 466      | 156  | 3207 | 3362  |
| MSTRG. 23265. 7  | coding    | 0. 464      | 156  | 3168 | 3323  |
| MSTRG. 23265. 15 | noncoding | -0. 0856064 | 3174 | 3474 | 3766  |
| MSTRG. 23262. 1  | coding    | 0. 288      | 255  | 1872 | 4633  |
| MSTRG. 23264. 1  | coding    | 0. 325      | 522  | 1980 | 2250  |
| MSTRG. 23258. 1  | noncoding | -0. 1929216 | 0    | 99   | 256   |
| MSTRG. 23259. 1  | noncoding | -0. 08192   | 0    | 375  | 831   |
| MSTRG. 23268. 1  | coding    | 0. 401      | 267  | 1020 | 1174  |
| MSTRG. 23272. 1  | noncoding | -0. 0917504 | 4557 | 4920 | 5169  |
| MSTRG. 23272. 2  | noncoding | -0. 0274432 | 2034 | 2766 | 4883  |
| MSTRG. 23272. 3  | noncoding | -0. 0577536 | 939  | 1524 | 10160 |
| MSTRG. 23272. 4  | noncoding | -0. 0888832 | 4260 | 5028 | 7282  |
| MSTRG. 23272. 5  | noncoding | -0. 0872448 | 747  | 1266 | 1921  |
| MSTRG. 23271. 3  | coding    | 0. 561      | 207  | 909  | 1247  |
| MSTRG. 23273. 3  | coding    | 0. 424      | 0    | 783  | 2159  |
| MSTRG. 23275. 3  | coding    | 0. 469      | 0    | 1032 | 1727  |
| MSTRG. 23280. 2  | coding    | 0. 459      | 0    | 870  | 1741  |
| MSTRG. 23284. 2  | coding    | 0. 314      | 12   | 828  | 1579  |
| MSTRG. 23285. 3  | coding    | 0. 422      | 0    | 1758 | 1971  |
| MSTRG. 23285. 4  | coding    | 0. 431      | 0    | 2394 | 2607  |
| MSTRG. 23285. 5  | coding    | 0. 407      | 873  | 3417 | 3630  |
| MSTRG. 23285. 6  | coding    | 0. 422      | 501  | 2898 | 3111  |
| MSTRG. 23285. 8  | coding    | 0. 408      | 2442 | 4818 | 5032  |
| MSTRG. 23279. 1  | coding    | 0. 397      | 0    | 402  | 1140  |
| MSTRG. 23291. 2  | coding    | 0. 227      | 57   | 444  | 640   |
| MSTRG. 23291. 3  | coding    | 0. 365      | 0    | 348  | 523   |
| MSTRG. 23292. 3  | coding    | 0. 321      | 789  | 2316 | 3798  |
| MSTRG. 23292. 4  | coding    | 0. 321      | 807  | 2334 | 3816  |
| MSTRG. 23292. 5  | coding    | 0. 385      | 4971 | 7185 | 8665  |
| MSTRG. 23292. 6  | coding    | 0. 391      | 138  | 2244 | 3623  |
| MSTRG. 23292. 8  | coding    | 0. 385      | 5481 | 7695 | 9177  |
| MSTRG. 23292. 9  | coding    | 0. 391      | 3795 | 5901 | 7281  |
| MSTRG. 23292. 10 | coding    | 0. 386      | 2625 | 4779 | 6531  |
| MSTRG. 23297. 4  | coding    | 0. 568      | 0    | 3165 | 3478  |
| MSTRG. 23297. 3  | coding    | 0. 562      | 0    | 3060 | 3424  |
| MSTRG. 23295. 1  | coding    | 0. 246      | 861  | 1941 | 2328  |
| MSTRG. 23296. 2  | coding    | 0. 232      | 0    | 993  | 1721  |
| MSTRG. 23296. 3  | noncoding | -0. 0978944 | 0    | 1077 | 1805  |
| MSTRG. 23301. 1  | coding    | 0. 245      | 267  | 702  | 918   |
| MSTRG. 23307. 1  | coding    | 0. 514      | 126  | 1932 | 7455  |
| MSTRG. 23307. 2  | coding    | 0. 557      | 450  | 2094 | 4195  |
| MSTRG. 23307. 3  | coding    | 0. 531      | 114  | 1875 | 6266  |
| MSTRG. 23307. 7  | coding    | 0. 548      | 0    | 1737 | 2318  |
| MSTRG. 23318. 4  | coding    | 0. 423      | 288  | 1875 | 2173  |
| MSTRG. 23318. 6  | coding    | 0. 423      | 243  | 1860 | 2156  |
| MSTRG. 23318. 7  | coding    | 0. 395      | 411  | 2205 | 2503  |
| MSTRG. 23318. 8  | coding    | 0. 425      | 153  | 1776 | 2072  |
| MSTRG. 23318. 9  | coding    | 0. 425      | 129  | 1752 | 2050  |

|                  |           |             |      |      |       |
|------------------|-----------|-------------|------|------|-------|
| MSTRG. 23321. 3  | coding    | 0. 48       | 0    | 534  | 713   |
| MSTRG. 23321. 2  | coding    | 0. 381      | 0    | 528  | 707   |
| MSTRG. 23322. 1  | noncoding | -0. 1777664 | 0    | 435  | 1524  |
| MSTRG. 23322. 4  | noncoding | -0. 0561152 | 234  | 441  | 1344  |
| MSTRG. 23322. 5  | noncoding | -0. 0606208 | 693  | 933  | 1089  |
| MSTRG. 23322. 3  | coding    | 0. 356      | 0    | 405  | 1533  |
| MSTRG. 23323. 3  | coding    | 0. 418      | 264  | 1989 | 2238  |
| MSTRG. 23314. 1  | coding    | 0. 359      | 0    | 3219 | 4974  |
| MSTRG. 23324. 2  | coding    | 0. 402      | 0    | 1860 | 3179  |
| MSTRG. 23325. 1  | coding    | 0. 44       | 237  | 1527 | 2660  |
| MSTRG. 23332. 2  | coding    | 0. 465      | 0    | 858  | 4163  |
| MSTRG. 23333. 1  | coding    | 0. 376      | 189  | 804  | 1268  |
| MSTRG. 23333. 3  | coding    | 0. 367      | 765  | 1353 | 1815  |
| MSTRG. 23327. 1  | noncoding | -0. 0176128 | 2775 | 2943 | 3525  |
| MSTRG. 23327. 2  | noncoding | -0. 0176128 | 4536 | 4704 | 5287  |
| MSTRG. 23327. 3  | noncoding | -0. 0176128 | 1734 | 1902 | 2485  |
| MSTRG. 23327. 4  | noncoding | -0. 045056  | 567  | 891  | 3975  |
| MSTRG. 23339. 3  | coding    | 0. 324      | 189  | 2262 | 3792  |
| MSTRG. 23347. 2  | coding    | 0. 37       | 477  | 8901 | 9289  |
| MSTRG. 23347. 3  | coding    | 0. 371      | 447  | 8979 | 10219 |
| MSTRG. 23348. 2  | noncoding | -0. 0643072 | 354  | 1332 | 1555  |
| MSTRG. 23348. 1  | noncoding | -0. 0765952 | 669  | 1737 | 1959  |
| MSTRG. 23349. 1  | coding    | 0. 378      | 174  | 840  | 1012  |
| MSTRG. 23349. 2  | coding    | 0. 395      | 0    | 651  | 818   |
| MSTRG. 23349. 3  | coding    | 0. 366      | 3    | 684  | 838   |
| MSTRG. 23349. 4  | coding    | 0. 414      | 0    | 759  | 929   |
| MSTRG. 23349. 5  | coding    | 0. 449      | 0    | 720  | 881   |
| MSTRG. 23350. 1  | coding    | 0. 418      | 0    | 4746 | 5521  |
| MSTRG. 23350. 4  | coding    | 0. 424      | 444  | 8181 | 8957  |
| MSTRG. 23355. 2  | coding    | 0. 432      | 1539 | 3072 | 3226  |
| MSTRG. 23357. 1  | coding    | 0. 372      | 1599 | 3000 | 4044  |
| MSTRG. 23360. 1  | noncoding | -0. 0749568 | 183  | 1146 | 2635  |
| MSTRG. 23360. 2  | noncoding | -0. 1007616 | 393  | 861  | 2347  |
| MSTRG. 23360. 3  | noncoding | -0. 0749568 | 177  | 1140 | 2488  |
| MSTRG. 23361. 1  | noncoding | -0. 0851968 | 495  | 813  | 968   |
| MSTRG. 23352. 3  | coding    | 0. 431      | 480  | 3195 | 3526  |
| MSTRG. 23352. 4  | coding    | 0. 431      | 102  | 3051 | 3381  |
| MSTRG. 23352. 5  | coding    | 0. 389      | 0    | 3162 | 3379  |
| MSTRG. 23365. 2  | noncoding | -0. 0462848 | 267  | 1146 | 1325  |
| MSTRG. 23369. 1  | coding    | 0. 059      | 465  | 999  | 1215  |
| MSTRG. 23369. 9  | coding    | 0. 059      | 771  | 1305 | 1520  |
| MSTRG. 23369. 10 | coding    | 0. 059      | 474  | 1008 | 1224  |
| MSTRG. 23367. 1  | noncoding | -0. 049152  | 0    | 108  | 342   |
| MSTRG. 23367. 3  | coding    | 0. 221      | 171  | 1008 | 1172  |
| MSTRG. 23370. 3  | coding    | 0. 095      | 0    | 732  | 994   |
| MSTRG. 23373. 2  | noncoding | -0. 1077248 | 216  | 945  | 1101  |
| MSTRG. 23374. 3  | coding    | 0. 435      | 3    | 1932 | 2135  |
| MSTRG. 23377. 2  | noncoding | -0. 0905216 | 183  | 834  | 1271  |
| MSTRG. 23377. 3  | noncoding | -0. 0995328 | 12   | 711  | 1150  |
| MSTRG. 23379. 1  | noncoding | -0. 0892928 | 480  | 723  | 2313  |
| MSTRG. 23380. 1  | coding    | 0. 274      | 237  | 1779 | 2265  |
| MSTRG. 23379. 3  | noncoding | -0. 1335296 | 333  | 867  | 1021  |
| MSTRG. 23380. 2  | coding    | 0. 266      | 237  | 1923 | 2379  |
| MSTRG. 23380. 3  | coding    | 0. 254      | 237  | 2103 | 2532  |

|                 |           |             |      |      |      |
|-----------------|-----------|-------------|------|------|------|
| MSTRG. 23380. 4 | coding    | 0. 264      | 237  | 1995 | 2424 |
| MSTRG. 23379. 4 | noncoding | -0. 14336   | 93   | 525  | 680  |
| MSTRG. 23380. 5 | coding    | 0. 273      | 237  | 1851 | 2607 |
| MSTRG. 23380. 6 | coding    | 0. 273      | 237  | 1815 | 2242 |
| MSTRG. 23380. 7 | coding    | 0. 169      | 237  | 3156 | 3522 |
| MSTRG. 23380. 8 | coding    | 0. 268      | 132  | 1854 | 2605 |
| MSTRG. 23382. 4 | coding    | 0. 65       | 342  | 1776 | 1938 |
| MSTRG. 23384. 2 | coding    | 0. 502      | 528  | 1872 | 2061 |
| MSTRG. 23387. 2 | coding    | 0. 024      | 1278 | 1503 | 2008 |
| MSTRG. 23388. 2 | coding    | 0. 302      | 189  | 435  | 998  |
| MSTRG. 23391. 1 | coding    | 0. 066      | 75   | 2037 | 3904 |
| MSTRG. 23391. 2 | coding    | 0. 093      | 0    | 150  | 688  |
| MSTRG. 23391. 4 | coding    | 0. 08       | 1764 | 3987 | 4205 |
| MSTRG. 23392. 1 | coding    | 0. 232      | 168  | 2514 | 3354 |
| MSTRG. 23396. 1 | noncoding | -0. 0241664 | 36   | 195  | 480  |
| MSTRG. 23397. 2 | coding    | 0. 416      | 162  | 1902 | 3201 |
| MSTRG. 23401. 5 | coding    | 0. 425      | 0    | 1182 | 1531 |
| MSTRG. 23399. 3 | coding    | 0. 595      | 0    | 1146 | 1340 |
| MSTRG. 23407. 2 | coding    | 0. 46       | 0    | 1545 | 1698 |
| MSTRG. 23412. 4 | noncoding | -0. 1650688 | 0    | 363  | 7096 |
| MSTRG. 23412. 2 | coding    | 0. 481      | 0    | 1431 | 2792 |
| MSTRG. 23412. 3 | coding    | 0. 481      | 0    | 1431 | 2864 |
| MSTRG. 23413. 1 | noncoding | -0. 0864256 | 0    | 294  | 3482 |
| MSTRG. 23406. 1 | coding    | 0. 42       | 495  | 1077 | 6753 |
| MSTRG. 23414. 1 | coding    | 0. 247      | 39   | 624  | 1550 |
| MSTRG. 23415. 1 | coding    | 0. 598      | 0    | 1785 | 2504 |
| MSTRG. 23415. 2 | coding    | 0. 506      | 0    | 435  | 912  |
| MSTRG. 23415. 3 | coding    | 0. 566      | 0    | 549  | 6458 |
| MSTRG. 23415. 5 | coding    | 0. 38       | 360  | 759  | 2844 |
| MSTRG. 23415. 4 | coding    | 0. 611      | 0    | 1890 | 3974 |
| MSTRG. 23416. 1 | coding    | 0. 456      | 0    | 2532 | 5190 |
| MSTRG. 23416. 2 | coding    | 0. 457      | 0    | 2463 | 3467 |
| MSTRG. 23420. 1 | coding    | 0. 284      | 90   | 2307 | 3170 |
| MSTRG. 23430. 2 | coding    | 0. 297      | 204  | 1485 | 2226 |
| MSTRG. 23433. 1 | coding    | 0. 297      | 867  | 2655 | 3450 |
| MSTRG. 23433. 2 | coding    | 0. 376      | 963  | 2079 | 2627 |
| MSTRG. 23435. 1 | noncoding | -0. 077824  | 1710 | 2484 | 2653 |
| MSTRG. 23443. 5 | coding    | 0. 614      | 186  | 1560 | 3007 |
| MSTRG. 23443. 6 | coding    | 0. 574      | 516  | 2385 | 3834 |
| MSTRG. 23443. 7 | coding    | 0. 614      | 84   | 1467 | 2858 |
| MSTRG. 23438. 3 | noncoding | -0. 1122304 | 0    | 699  | 856  |
| MSTRG. 23451. 2 | coding    | 0. 339      | 372  | 2181 | 2372 |
| MSTRG. 23451. 3 | coding    | 0. 341      | 345  | 2154 | 2345 |
| MSTRG. 23454. 2 | coding    | 0. 43       | 18   | 492  | 735  |
| MSTRG. 23455. 1 | noncoding | -0. 0466944 | 18   | 288  | 1169 |
| MSTRG. 23456. 1 | coding    | 0. 441      | 1113 | 3933 | 4141 |
| MSTRG. 23461. 2 | coding    | 0. 517      | 438  | 1833 | 4181 |
| MSTRG. 23462. 1 | coding    | 0. 443      | 504  | 2130 | 2840 |
| MSTRG. 23457. 2 | coding    | 0. 517      | 0    | 663  | 818  |
| MSTRG. 23463. 2 | coding    | 0. 342      | 6    | 378  | 534  |
| MSTRG. 23467. 2 | coding    | 0. 48       | 417  | 4116 | 6537 |
| MSTRG. 23467. 3 | coding    | 0. 41       | 1101 | 5670 | 5957 |
| MSTRG. 23467. 5 | coding    | 0. 497      | 1635 | 5301 | 5541 |
| MSTRG. 23467. 4 | coding    | 0. 481      | 279  | 4269 | 4509 |

|                  |           |             |      |      |      |
|------------------|-----------|-------------|------|------|------|
| MSTRG. 23466. 3  | noncoding | -0. 0720896 | 3    | 1167 | 1323 |
| MSTRG. 23470. 1  | coding    | 0. 441      | 66   | 2106 | 2985 |
| MSTRG. 23470. 2  | coding    | 0. 486      | 3    | 1968 | 2573 |
| MSTRG. 23474. 2  | coding    | 0. 337      | 459  | 1440 | 1663 |
| MSTRG. 23479. 8  | coding    | 0. 326      | 1098 | 4239 | 4828 |
| MSTRG. 23479. 5  | coding    | 0. 331      | 2136 | 5091 | 5354 |
| MSTRG. 23479. 7  | coding    | 0. 322      | 2145 | 5220 | 5483 |
| MSTRG. 23479. 9  | coding    | 0. 247      | 687  | 3948 | 4203 |
| MSTRG. 23479. 3  | coding    | 0. 32       | 1242 | 4302 | 4559 |
| MSTRG. 23479. 10 | coding    | 0. 336      | 1128 | 4149 | 4705 |
| MSTRG. 23479. 11 | coding    | 0. 336      | 1149 | 4170 | 4728 |
| MSTRG. 23482. 3  | coding    | 0. 494      | 489  | 3300 | 3504 |
| MSTRG. 23482. 4  | coding    | 0. 487      | 42   | 2862 | 3068 |
| MSTRG. 23484. 1  | coding    | 0. 239      | 705  | 1296 | 1465 |
| MSTRG. 23485. 2  | coding    | 0. 42       | 147  | 1419 | 2277 |
| MSTRG. 23486. 1  | coding    | 0. 423      | 594  | 1419 | 1576 |
| MSTRG. 23488. 2  | coding    | 0. 369      | 0    | 1164 | 1970 |
| MSTRG. 23488. 4  | coding    | 0. 358      | 4440 | 5163 | 5971 |
| MSTRG. 23491. 2  | coding    | 0. 351      | 117  | 702  | 856  |
| MSTRG. 23492. 2  | coding    | 0. 583      | 0    | 1329 | 1483 |
| MSTRG. 23492. 5  | coding    | 0. 399      | 402  | 1149 | 4212 |
| MSTRG. 23495. 1  | coding    | 0. 319      | 0    | 675  | 1291 |
| MSTRG. 23505. 2  | coding    | 0. 378      | 0    | 2013 | 2305 |
| MSTRG. 23510. 2  | coding    | 0. 164      | 255  | 2511 | 2735 |
| MSTRG. 23515. 4  | coding    | 0. 265      | 0    | 1968 | 2195 |
| MSTRG. 23520. 1  | coding    | 0. 321      | 840  | 1458 | 1736 |
| MSTRG. 23520. 2  | coding    | 0. 347      | 117  | 699  | 978  |
| MSTRG. 23520. 3  | coding    | 0. 32       | 213  | 825  | 1102 |
| MSTRG. 23520. 4  | coding    | 0. 318      | 174  | 771  | 1048 |
| MSTRG. 23513. 1  | coding    | 0. 263      | 1479 | 2619 | 3961 |
| MSTRG. 23522. 5  | noncoding | -0. 2727936 | 3480 | 4290 | 4503 |
| MSTRG. 23522. 3  | noncoding | -0. 2658304 | 3078 | 3915 | 4161 |
| MSTRG. 23522. 4  | noncoding | -0. 2727936 | 3078 | 3888 | 4134 |
| MSTRG. 23525. 2  | coding    | 0. 508      | 0    | 3453 | 4355 |
| MSTRG. 23528. 2  | coding    | 0. 424      | 5121 | 8253 | 8728 |
| MSTRG. 23529. 9  | coding    | 0. 201      | 129  | 1806 | 2561 |
| MSTRG. 23530. 1  | coding    | 0. 387      | 0    | 1335 | 1622 |
| MSTRG. 23531. 2  | coding    | 0. 311      | 267  | 1296 | 1450 |
| MSTRG. 23531. 1  | coding    | 0. 323      | 102  | 996  | 1372 |
| MSTRG. 23530. 3  | coding    | 0. 398      | 0    | 1353 | 1914 |
| MSTRG. 23532. 1  | noncoding | -0. 008192  | 0    | 69   | 360  |
| MSTRG. 23535. 3  | coding    | 0. 377      | 0    | 1743 | 2646 |
| MSTRG. 23535. 2  | coding    | 0. 366      | 102  | 1761 | 2670 |
| MSTRG. 23535. 4  | coding    | 0. 385      | 318  | 1995 | 2905 |
| MSTRG. 23535. 6  | coding    | 0. 423      | 24   | 1392 | 2486 |
| MSTRG. 23534. 2  | noncoding | -0. 0905216 | 102  | 360  | 1600 |
| MSTRG. 23545. 2  | coding    | 0. 421      | 1908 | 7866 | 8758 |
| MSTRG. 23550. 1  | coding    | 0. 487      | 720  | 4347 | 4502 |
| MSTRG. 23550. 3  | coding    | 0. 487      | 2610 | 6237 | 6394 |
| MSTRG. 23550. 4  | coding    | 0. 487      | 477  | 4104 | 4260 |
| MSTRG. 23551. 4  | coding    | 0. 267      | 231  | 1437 | 1607 |
| MSTRG. 23552. 4  | coding    | 0. 189      | 0    | 495  | 675  |
| MSTRG. 23552. 5  | noncoding | -0. 0671744 | 0    | 408  | 2934 |
| MSTRG. 23552. 2  | noncoding | -0. 0671744 | 0    | 408  | 2127 |

|                  |           |             |      |      |      |
|------------------|-----------|-------------|------|------|------|
| MSTRG. 23552. 3  | noncoding | -0. 0671744 | 0    | 408  | 3990 |
| MSTRG. 23553. 4  | coding    | 0. 432      | 0    | 1467 | 1698 |
| MSTRG. 23567. 3  | coding    | 0. 6        | 0    | 3183 | 3812 |
| MSTRG. 23568. 2  | coding    | 0. 364      | 372  | 1518 | 1857 |
| MSTRG. 23568. 3  | noncoding | -0. 057344  | 432  | 522  | 1523 |
| MSTRG. 23572. 3  | coding    | 0. 468      | 63   | 645  | 1444 |
| MSTRG. 23572. 4  | coding    | 0. 436      | 72   | 591  | 1381 |
| MSTRG. 23574. 4  | coding    | 0. 457      | 330  | 1863 | 2879 |
| MSTRG. 23575. 2  | coding    | 0. 357      | 255  | 1164 | 1761 |
| MSTRG. 23559. 4  | coding    | 0. 329      | 249  | 1350 | 1830 |
| MSTRG. 23559. 5  | coding    | 0. 328      | 288  | 1440 | 1885 |
| MSTRG. 23560. 2  | coding    | 0. 215      | 81   | 339  | 1656 |
| MSTRG. 23561. 1  | coding    | 0. 231      | 0    | 2289 | 3779 |
| MSTRG. 23561. 2  | coding    | 0. 325      | 0    | 519  | 924  |
| MSTRG. 23556. 1  | coding    | 0. 277      | 114  | 792  | 968  |
| MSTRG. 23558. 2  | coding    | 0. 501      | 0    | 1359 | 1847 |
| MSTRG. 23562. 1  | noncoding | -0. 0905216 | 345  | 699  | 897  |
| MSTRG. 23577. 2  | coding    | 0. 41       | 12   | 636  | 3322 |
| MSTRG. 23579. 1  | coding    | 0. 33       | 1590 | 6609 | 8440 |
| MSTRG. 23580. 1  | coding    | 0. 459      | 0    | 867  | 1362 |
| MSTRG. 23582. 1  | coding    | 0. 264      | 57   | 945  | 1110 |
| MSTRG. 23583. 2  | coding    | 0. 589      | 183  | 1068 | 1893 |
| MSTRG. 23585. 4  | coding    | 0. 202      | 177  | 708  | 1074 |
| MSTRG. 23586. 1  | coding    | 0. 326      | 213  | 1698 | 2713 |
| MSTRG. 23586. 2  | coding    | 0. 326      | 189  | 1557 | 1803 |
| MSTRG. 23586. 3  | noncoding | -0. 0782336 | 165  | 1419 | 3182 |
| MSTRG. 23585. 6  | noncoding | -0. 0462848 | 123  | 1266 | 2193 |
| MSTRG. 23585. 7  | coding    | 0. 279      | 60   | 399  | 1267 |
| MSTRG. 23585. 8  | coding    | 0. 284      | 60   | 957  | 1323 |
| MSTRG. 23585. 9  | coding    | 0. 303      | 60   | 447  | 1262 |
| MSTRG. 23585. 10 | coding    | 0. 316      | 0    | 378  | 1296 |
| MSTRG. 23585. 11 | coding    | 0. 316      | 0    | 426  | 1248 |
| MSTRG. 23587. 1  | coding    | 0. 323      | 504  | 1074 | 1469 |
| MSTRG. 23587. 2  | coding    | 0. 29       | 474  | 1002 | 1199 |
| MSTRG. 23592. 1  | noncoding | -0. 012288  | 378  | 519  | 1111 |
| MSTRG. 23593. 1  | noncoding | -0. 065536  | 630  | 657  | 2280 |
| MSTRG. 23594. 1  | noncoding | -0. 0331776 | 363  | 540  | 2273 |
| MSTRG. 23594. 2  | noncoding | -0. 0331776 | 498  | 675  | 1416 |
| MSTRG. 23594. 3  | noncoding | -0. 0331776 | 492  | 669  | 4671 |
| MSTRG. 23594. 4  | noncoding | -0. 002048  | 141  | 354  | 1078 |
| MSTRG. 23595. 1  | coding    | 0. 178      | 525  | 1194 | 1744 |
| MSTRG. 23595. 2  | coding    | 0. 178      | 360  | 1029 | 1355 |
| MSTRG. 23595. 3  | coding    | 0. 164      | 720  | 1320 | 1866 |
| MSTRG. 23595. 4  | coding    | 0. 185      | 117  | 735  | 1281 |
| MSTRG. 23594. 5  | noncoding | -0. 065536  | 282  | 384  | 1203 |
| MSTRG. 23597. 2  | coding    | 0. 34       | 39   | 789  | 2124 |
| MSTRG. 23597. 3  | coding    | 0. 508      | 0    | 540  | 694  |
| MSTRG. 23598. 1  | coding    | 0. 289      | 897  | 3597 | 5851 |
| MSTRG. 23598. 2  | coding    | 0. 284      | 996  | 3762 | 4842 |
| MSTRG. 23598. 3  | coding    | 0. 292      | 570  | 3270 | 4352 |
| MSTRG. 23598. 4  | coding    | 0. 464      | 597  | 1257 | 1412 |
| MSTRG. 23603. 2  | coding    | 0. 119      | 1353 | 1965 | 3267 |
| MSTRG. 23607. 2  | noncoding | -0. 0012288 | 30   | 180  | 378  |
| MSTRG. 23608. 2  | noncoding | -0. 0380928 | 3    | 726  | 883  |

|                  |           |             |      |      |       |
|------------------|-----------|-------------|------|------|-------|
| MSTRG. 23619. 1  | coding    | 0. 127      | 225  | 837  | 1665  |
| MSTRG. 23621. 5  | coding    | 0. 308      | 363  | 588  | 993   |
| MSTRG. 23621. 4  | coding    | 0. 094      | 414  | 2361 | 2543  |
| MSTRG. 23621. 1  | coding    | 0. 085      | 609  | 2544 | 5210  |
| MSTRG. 23621. 6  | coding    | 0. 089      | 609  | 2376 | 5042  |
| MSTRG. 23621. 3  | coding    | 0. 1        | 219  | 2187 | 5920  |
| MSTRG. 23622. 1  | noncoding | -0. 0016384 | 213  | 318  | 1435  |
| MSTRG. 23621. 7  | coding    | 0. 078      | 507  | 2343 | 2544  |
| MSTRG. 23621. 9  | coding    | 0. 095      | 3129 | 4380 | 4562  |
| MSTRG. 23621. 11 | coding    | 0. 095      | 2550 | 3801 | 7535  |
| MSTRG. 23621. 17 | noncoding | -0. 08192   | 3384 | 3468 | 6404  |
| MSTRG. 23621. 18 | coding    | 0. 095      | 4497 | 5301 | 5953  |
| MSTRG. 23623. 1  | noncoding | -0. 006144  | 201  | 282  | 462   |
| MSTRG. 23629. 1  | noncoding | -0. 0425984 | 1032 | 1287 | 2982  |
| MSTRG. 23630. 1  | noncoding | -0. 049152  | 6162 | 6258 | 7160  |
| MSTRG. 23630. 2  | coding    | 0. 027      | 1479 | 1641 | 2072  |
| MSTRG. 23630. 3  | coding    | 0. 066      | 1332 | 1503 | 3009  |
| MSTRG. 23630. 4  | coding    | 0. 066      | 798  | 969  | 6406  |
| MSTRG. 23631. 1  | noncoding | -0. 004096  | 273  | 360  | 825   |
| MSTRG. 23616. 2  | noncoding | -0. 002048  | 2769 | 2886 | 3150  |
| MSTRG. 23753. 1  | noncoding | -0. 008192  | 921  | 1038 | 1602  |
| MSTRG. 23754. 2  | coding    | 0. 032      | 714  | 2277 | 3214  |
| MSTRG. 23754. 1  | coding    | 0. 031      | 597  | 1998 | 2941  |
| MSTRG. 23754. 4  | coding    | 0. 026      | 945  | 2328 | 2482  |
| MSTRG. 23754. 3  | coding    | 0. 031      | 936  | 2337 | 3278  |
| MSTRG. 23754. 5  | coding    | 0. 049      | 264  | 3090 | 4031  |
| MSTRG. 23754. 7  | coding    | 0. 034      | 264  | 1665 | 2606  |
| MSTRG. 23754. 13 | coding    | 0. 058      | 1356 | 1812 | 3231  |
| MSTRG. 23754. 14 | coding    | 0. 06       | 1092 | 2487 | 4775  |
| MSTRG. 23754. 16 | coding    | 0. 06       | 1080 | 2397 | 3340  |
| MSTRG. 23758. 1  | noncoding | -0. 0004096 | 489  | 570  | 766   |
| MSTRG. 23763. 1  | coding    | 0. 026      | 0    | 99   | 3712  |
| MSTRG. 23769. 5  | coding    | 0. 131      | 39   | 474  | 6828  |
| MSTRG. 23769. 6  | noncoding | -0. 0557056 | 0    | 201  | 10400 |
| MSTRG. 23769. 8  | coding    | 0. 089      | 99   | 498  | 5510  |
| MSTRG. 23770. 2  | coding    | 0. 051      | 174  | 1767 | 5235  |
| MSTRG. 23770. 1  | coding    | 0. 051      | 762  | 2355 | 5822  |
| MSTRG. 23770. 3  | coding    | 0. 036      | 1158 | 2721 | 6189  |
| MSTRG. 23770. 4  | noncoding | -0. 008192  | 1707 | 1833 | 11573 |
| MSTRG. 23770. 5  | coding    | 0. 036      | 3240 | 4803 | 8144  |
| MSTRG. 23770. 6  | coding    | 0. 052      | 375  | 1989 | 5329  |
| MSTRG. 23770. 7  | coding    | 0. 051      | 2502 | 4095 | 7434  |
| MSTRG. 23770. 8  | coding    | 0. 272      | 0    | 243  | 4176  |
| MSTRG. 23770. 10 | coding    | 0. 051      | 1239 | 2832 | 5925  |
| MSTRG. 23770. 9  | coding    | 0. 036      | 1155 | 2718 | 5811  |
| MSTRG. 23773. 2  | coding    | 0. 049      | 273  | 2706 | 3946  |
| MSTRG. 23769. 11 | coding    | 0. 179      | 0    | 204  | 2058  |
| MSTRG. 23765. 13 | noncoding | -0. 0847872 | 159  | 810  | 1143  |
| MSTRG. 23765. 15 | noncoding | -0. 0806912 | 159  | 765  | 1098  |
| MSTRG. 23765. 10 | noncoding | -0. 0876544 | 213  | 762  | 1108  |
| MSTRG. 23765. 12 | noncoding | -0. 0970752 | 213  | 810  | 1156  |
| MSTRG. 23765. 9  | noncoding | -0. 0884736 | 213  | 750  | 1096  |
| MSTRG. 23765. 8  | noncoding | -0. 07168   | 1047 | 1506 | 1841  |
| MSTRG. 23765. 11 | noncoding | -0. 0974848 | 213  | 846  | 2262  |



|                  |           |             |      |      |      |
|------------------|-----------|-------------|------|------|------|
| MSTRG. 23765. 14 | noncoding | -0. 08192   | 201  | 807  | 2224 |
| MSTRG. 23765. 4  | noncoding | -0. 0823296 | 1359 | 1959 | 2292 |
| MSTRG. 23765. 7  | noncoding | -0. 0823296 | 1347 | 1947 | 2280 |
| MSTRG. 23765. 5  | noncoding | -0. 069632  | 870  | 1281 | 1616 |
| MSTRG. 23765. 6  | noncoding | -0. 0835584 | 1353 | 1845 | 2178 |
| MSTRG. 23770. 13 | coding    | 0. 263      | 3    | 252  | 3048 |
| MSTRG. 23774. 1  | coding    | 0. 036      | 252  | 1749 | 3839 |
| MSTRG. 23770. 14 | noncoding | -0. 0004096 | 3075 | 3198 | 3408 |
| MSTRG. 23775. 1  | noncoding | -0. 14336   | 351  | 399  | 650  |
| MSTRG. 23776. 1  | noncoding | -0. 01024   | 816  | 1017 | 1413 |
| MSTRG. 23777. 1  | noncoding | -0. 0618496 | 2097 | 2433 | 8755 |
| MSTRG. 23777. 2  | coding    | 0. 08       | 84   | 1680 | 6548 |
| MSTRG. 23777. 3  | noncoding | -0. 0618496 | 492  | 828  | 7064 |
| MSTRG. 23778. 1  | noncoding | -0. 049152  | 321  | 414  | 1267 |
| MSTRG. 23778. 2  | noncoding | -0. 0495616 | 1722 | 1890 | 6428 |
| MSTRG. 23779. 1  | coding    | 0. 045      | 78   | 2304 | 4267 |
| MSTRG. 23779. 2  | coding    | 0. 051      | 555  | 2889 | 3763 |
| MSTRG. 23779. 3  | coding    | 0. 048      | 555  | 2805 | 3679 |
| MSTRG. 23783. 1  | noncoding | -0. 0004096 | 0    | 0    | 391  |
| MSTRG. 23785. 1  | noncoding | -0. 018432  | 339  | 435  | 590  |
| MSTRG. 23786. 1  | noncoding | -0. 0028672 | 63   | 111  | 338  |
| MSTRG. 23788. 2  | coding    | 0. 163      | 144  | 585  | 5322 |
| MSTRG. 23788. 3  | coding    | 0. 186      | 51   | 492  | 2905 |
| MSTRG. 23788. 4  | coding    | 0. 186      | 51   | 492  | 2372 |
| MSTRG. 23788. 5  | noncoding | -0. 059392  | 147  | 408  | 5579 |
| MSTRG. 23788. 7  | coding    | 0. 186      | 63   | 504  | 2296 |
| MSTRG. 23788. 6  | coding    | 0. 158      | 147  | 516  | 4154 |
| MSTRG. 23788. 8  | coding    | 0. 216      | 114  | 510  | 716  |
| MSTRG. 23788. 9  | noncoding | -0. 059392  | 33   | 267  | 422  |
| MSTRG. 23789. 1  | coding    | 0. 029      | 1407 | 1560 | 2276 |
| MSTRG. 23790. 1  | noncoding | -0. 0397312 | 3    | 162  | 1379 |
| MSTRG. 23790. 2  | noncoding | -0. 0090112 | 330  | 486  | 2431 |
| MSTRG. 23789. 2  | noncoding | -0. 049152  | 3819 | 4092 | 4324 |
| MSTRG. 23789. 3  | noncoding | -0. 049152  | 720  | 993  | 1283 |
| MSTRG. 23791. 1  | coding    | 0. 083      | 2913 | 3435 | 7788 |
| MSTRG. 23791. 3  | noncoding | -0. 0065536 | 1518 | 1668 | 4066 |
| MSTRG. 23791. 5  | coding    | 0. 106      | 2853 | 3372 | 7723 |
| MSTRG. 23791. 6  | noncoding | -0. 059392  | 2502 | 2703 | 7569 |
| MSTRG. 23791. 4  | noncoding | -0. 0503808 | 2574 | 2757 | 7655 |
| MSTRG. 23791. 7  | noncoding | -0. 0049152 | 129  | 288  | 4979 |
| MSTRG. 23791. 8  | coding    | 0. 106      | 2886 | 3405 | 7757 |
| MSTRG. 23791. 9  | noncoding | -0. 034816  | 4674 | 5250 | 7520 |
| MSTRG. 23791. 11 | noncoding | -0. 0835584 | 2754 | 2952 | 7850 |
| MSTRG. 23791. 10 | coding    | 0. 106      | 2754 | 3273 | 7659 |
| MSTRG. 23632. 1  | noncoding | -0. 0466944 | 5532 | 5703 | 6217 |
| MSTRG. 23632. 3  | noncoding | -0. 0151552 | 2067 | 2244 | 6274 |
| MSTRG. 23632. 4  | noncoding | -0. 032768  | 63   | 174  | 2608 |
| MSTRG. 23632. 5  | noncoding | -0. 032768  | 60   | 171  | 2680 |
| MSTRG. 23632. 6  | noncoding | -0. 057344  | 60   | 165  | 2773 |
| MSTRG. 23632. 7  | coding    | 0. 2        | 0    | 111  | 2045 |
| MSTRG. 23632. 8  | noncoding | -0. 0151552 | 45   | 222  | 2071 |
| MSTRG. 23632. 9  | noncoding | -0. 0221184 | 0    | 123  | 3464 |
| MSTRG. 23632. 10 | noncoding | -0. 0466944 | 1848 | 2019 | 2352 |
| MSTRG. 23632. 11 | coding    | 0. 01       | 1104 | 1401 | 3510 |

|                 |           |             |      |      |      |
|-----------------|-----------|-------------|------|------|------|
| MSTRG. 23635. 2 | coding    | 0. 138      | 525  | 912  | 3009 |
| MSTRG. 23635. 3 | coding    | 0. 142      | 471  | 849  | 2945 |
| MSTRG. 23639. 1 | noncoding | -0. 0503808 | 5439 | 5778 | 5932 |
| MSTRG. 23651. 1 | coding    | 0. 207      | 81   | 378  | 1470 |
| MSTRG. 23652. 1 | noncoding | -0. 139264  | 48   | 111  | 275  |
| MSTRG. 23653. 1 | noncoding | -0. 0262144 | 189  | 234  | 616  |
| MSTRG. 23654. 1 | coding    | 0. 151      | 2997 | 3414 | 4824 |
| MSTRG. 23659. 1 | noncoding | -0. 018432  | 453  | 561  | 1411 |
| MSTRG. 23651. 2 | noncoding | -0. 02048   | 387  | 423  | 814  |
| MSTRG. 23660. 1 | noncoding | -0. 0004096 | 213  | 543  | 1259 |
| MSTRG. 23651. 3 | noncoding | -0. 0004096 | 0    | 0    | 613  |
| MSTRG. 23651. 4 | coding    | 0. 159      | 3396 | 3777 | 8200 |
| MSTRG. 23651. 5 | noncoding | -0. 028672  | 3    | 54   | 1602 |
| MSTRG. 23663. 1 | noncoding | -0. 094208  | 114  | 126  | 695  |
| MSTRG. 23664. 1 | noncoding | -0. 024576  | 363  | 438  | 994  |
| MSTRG. 23651. 6 | coding    | 0. 189      | 867  | 1137 | 1878 |
| MSTRG. 23651. 7 | coding    | 0. 169      | 1710 | 1986 | 7710 |
| MSTRG. 23651. 8 | noncoding | -0. 02048   | 192  | 231  | 466  |
| MSTRG. 23666. 1 | noncoding | -0. 165888  | 0    | 87   | 628  |
| MSTRG. 23667. 1 | noncoding | -0. 090112  | 84   | 174  | 984  |
| MSTRG. 23668. 1 | noncoding | -0. 0004096 | 138  | 138  | 616  |
| MSTRG. 23670. 1 | coding    | 0. 238      | 153  | 456  | 4309 |
| MSTRG. 23670. 2 | coding    | 0. 197      | 108  | 366  | 3774 |
| MSTRG. 23670. 3 | coding    | 0. 197      | 108  | 366  | 3704 |
| MSTRG. 23671. 1 | noncoding | -0. 1622016 | 0    | 90   | 257  |
| MSTRG. 23644. 2 | noncoding | -0. 0585728 | 9    | 198  | 659  |
| MSTRG. 23644. 1 | noncoding | -0. 0585728 | 9    | 195  | 352  |
| MSTRG. 23644. 3 | noncoding | -0. 0585728 | 0    | 189  | 895  |
| MSTRG. 23644. 4 | noncoding | -0. 0610304 | 0    | 180  | 874  |
| MSTRG. 23677. 1 | coding    | 0. 459      | 0    | 1983 | 3020 |
| MSTRG. 23677. 2 | coding    | 0. 453      | 0    | 1908 | 5778 |
| MSTRG. 23678. 6 | coding    | 0. 556      | 117  | 1560 | 1740 |
| MSTRG. 23681. 4 | coding    | 0. 556      | 468  | 1218 | 1710 |
| MSTRG. 23681. 5 | coding    | 0. 445      | 0    | 1215 | 1707 |
| MSTRG. 23681. 6 | coding    | 0. 422      | 0    | 1449 | 1941 |
| MSTRG. 23683. 1 | noncoding | -0. 06144   | 2004 | 2601 | 4642 |
| MSTRG. 23683. 2 | noncoding | -0. 0458752 | 786  | 1368 | 1525 |
| MSTRG. 23683. 3 | noncoding | -0. 0200704 | 21   | 474  | 1352 |
| MSTRG. 23690. 1 | noncoding | -0. 0045056 | 81   | 303  | 1153 |
| MSTRG. 23694. 7 | coding    | 0. 44       | 0    | 2007 | 2162 |
| MSTRG. 23694. 5 | coding    | 0. 514      | 0    | 3081 | 3236 |
| MSTRG. 23694. 6 | coding    | 0. 429      | 0    | 2157 | 2311 |
| MSTRG. 23694. 4 | coding    | 0. 489      | 0    | 3345 | 3499 |
| MSTRG. 23696. 1 | coding    | 0. 423      | 573  | 2622 | 6456 |
| MSTRG. 23696. 3 | coding    | 0. 421      | 276  | 2262 | 6104 |
| MSTRG. 23687. 1 | coding    | 0. 286      | 354  | 843  | 1012 |
| MSTRG. 23688. 1 | noncoding | -0. 0299008 | 1299 | 1692 | 1848 |
| MSTRG. 23698. 3 | coding    | 0. 321      | 240  | 2817 | 3165 |
| MSTRG. 23701. 3 | coding    | 0. 383      | 303  | 1521 | 1743 |
| MSTRG. 23706. 1 | coding    | 0. 553      | 237  | 3102 | 4027 |
| MSTRG. 23706. 3 | coding    | 0. 586      | 1308 | 4023 | 4938 |
| MSTRG. 23706. 2 | coding    | 0. 556      | 189  | 3036 | 3960 |
| MSTRG. 23699. 1 | noncoding | -0. 0790528 | 159  | 822  | 1721 |
| MSTRG. 23709. 3 | coding    | 0. 316      | 93   | 3129 | 3285 |

|                 |           |             |      |       |       |
|-----------------|-----------|-------------|------|-------|-------|
| MSTRG. 23709. 4 | coding    | 0. 48       | 0    | 1116  | 1986  |
| MSTRG. 23709. 5 | coding    | 0. 512      | 0    | 960   | 1822  |
| MSTRG. 23709. 6 | coding    | 0. 37       | 180  | 981   | 1162  |
| MSTRG. 23709. 7 | coding    | 0. 389      | 378  | 1146  | 1327  |
| MSTRG. 23712. 1 | noncoding | -0. 0581632 | 486  | 771   | 1433  |
| MSTRG. 23711. 2 | noncoding | -0. 086016  | 642  | 855   | 1029  |
| MSTRG. 23716. 1 | coding    | 0. 563      | 0    | 2325  | 2960  |
| MSTRG. 23716. 2 | coding    | 0. 563      | 0    | 2322  | 2957  |
| MSTRG. 23716. 6 | coding    | 0. 483      | 6849 | 8616  | 9252  |
| MSTRG. 23716. 7 | coding    | 0. 466      | 9555 | 11376 | 12010 |
| MSTRG. 23717. 2 | noncoding | -0. 0806912 | 1029 | 1548  | 1725  |
| MSTRG. 23717. 3 | noncoding | -0. 0831488 | 246  | 762   | 946   |
| MSTRG. 23718. 2 | coding    | 0. 439      | 0    | 1119  | 1595  |
| MSTRG. 23720. 4 | coding    | 0. 441      | 0    | 2847  | 5505  |
| MSTRG. 23720. 5 | coding    | 0. 512      | 135  | 2475  | 5134  |
| MSTRG. 23727. 3 | coding    | 0. 347      | 0    | 1077  | 1663  |
| MSTRG. 23728. 1 | noncoding | -0. 0851968 | 0    | 243   | 530   |
| MSTRG. 23728. 2 | coding    | 0. 255      | 0    | 606   | 896   |
| MSTRG. 23731. 2 | coding    | 0. 534      | 0    | 2427  | 2582  |
| MSTRG. 23732. 2 | coding    | 0. 616      | 477  | 2076  | 2285  |
| MSTRG. 23732. 3 | coding    | 0. 61       | 477  | 1986  | 2195  |
| MSTRG. 23736. 1 | coding    | 0. 302      | 0    | 1023  | 1385  |
| MSTRG. 23743. 2 | coding    | 0. 388      | 0    | 1338  | 1493  |
| MSTRG. 23744. 2 | coding    | 0. 209      | 135  | 1521  | 2140  |
| MSTRG. 23744. 3 | coding    | 0. 221      | 0    | 1119  | 2010  |
| MSTRG. 23797. 2 | noncoding | -0. 0704512 | 0    | 648   | 9161  |
| MSTRG. 23801. 4 | coding    | 0. 155      | 0    | 1443  | 2066  |
| MSTRG. 23801. 3 | coding    | 0. 228      | 0    | 393   | 967   |
| MSTRG. 23801. 5 | noncoding | -0. 0876544 | 0    | 219   | 1717  |
| MSTRG. 23809. 2 | coding    | 0. 071      | 210  | 2616  | 2990  |
| MSTRG. 23794. 1 | coding    | 0. 176      | 9    | 732   | 2464  |
| MSTRG. 23794. 3 | coding    | 0. 198      | 105  | 1611  | 4535  |
| MSTRG. 23814. 1 | coding    | 0. 406      | 195  | 1350  | 1533  |
| MSTRG. 23817. 2 | noncoding | -0. 028672  | 4101 | 4410  | 4566  |
| MSTRG. 23841. 3 | coding    | 0. 207      | 3    | 1314  | 1469  |
| MSTRG. 23841. 2 | coding    | 0. 234      | 3    | 1992  | 4953  |
| MSTRG. 23846. 1 | noncoding | -0. 0032768 | 1605 | 1749  | 6794  |
| MSTRG. 23846. 2 | noncoding | -0. 0188416 | 2631 | 3138  | 12041 |
| MSTRG. 23846. 3 | noncoding | -0. 0188416 | 2607 | 3114  | 11996 |
| MSTRG. 23847. 1 | coding    | 0. 124      | 75   | 894   | 2656  |
| MSTRG. 23849. 1 | noncoding | -0. 016384  | 1611 | 1677  | 1832  |
| MSTRG. 23855. 2 | noncoding | -0. 0360448 | 135  | 990   | 2402  |
| MSTRG. 23857. 1 | coding    | 0. 074      | 195  | 666   | 2007  |
| MSTRG. 23857. 2 | noncoding | -0. 0118784 | 1410 | 1533  | 3050  |
| MSTRG. 23855. 3 | coding    | 0. 138      | 516  | 1731  | 3073  |
| MSTRG. 23855. 4 | coding    | 0. 35       | 57   | 1356  | 5963  |
| MSTRG. 23860. 1 | coding    | 0. 192      | 0    | 1425  | 7580  |
| MSTRG. 23860. 2 | coding    | 0. 188      | 0    | 1242  | 1471  |
| MSTRG. 23857. 3 | noncoding | -0. 339968  | 1080 | 1089  | 1412  |
| MSTRG. 23855. 9 | coding    | 0. 328      | 603  | 1935  | 3621  |
| MSTRG. 23824. 1 | noncoding | -0. 0004096 | 315  | 450   | 642   |
| MSTRG. 23825. 1 | coding    | 0. 154      | 2412 | 3198  | 10404 |
| MSTRG. 23825. 3 | coding    | 0. 154      | 912  | 1698  | 2746  |
| MSTRG. 23825. 4 | coding    | 0. 154      | 1362 | 2148  | 3196  |

|                  |           |             |      |      |       |
|------------------|-----------|-------------|------|------|-------|
| MSTRG. 23825. 5  | coding    | 0. 093      | 246  | 1350 | 8372  |
| MSTRG. 23827. 1  | noncoding | -0. 0004096 | 867  | 1284 | 8839  |
| MSTRG. 23828. 1  | noncoding | -0. 0004096 | 489  | 564  | 841   |
| MSTRG. 23833. 1  | coding    | 0. 115      | 558  | 894  | 3881  |
| MSTRG. 23834. 1  | coding    | 0. 089      | 1614 | 2064 | 3344  |
| MSTRG. 23834. 2  | coding    | 0. 14       | 33   | 732  | 3231  |
| MSTRG. 23834. 3  | noncoding | -0. 0425984 | 2319 | 2682 | 5858  |
| MSTRG. 23834. 4  | noncoding | -0. 079872  | 33   | 306  | 5403  |
| MSTRG. 23834. 5  | noncoding | -0. 104448  | 4836 | 5085 | 6553  |
| MSTRG. 23868. 2  | noncoding | -0. 0688128 | 48   | 309  | 4800  |
| MSTRG. 23868. 4  | noncoding | -0. 0954368 | 96   | 303  | 4795  |
| MSTRG. 23872. 6  | coding    | 0. 073      | 8133 | 9468 | 10966 |
| MSTRG. 23872. 7  | coding    | 0. 087      | 930  | 2322 | 3819  |
| MSTRG. 23872. 3  | coding    | 0. 087      | 1170 | 2562 | 4059  |
| MSTRG. 23872. 1  | coding    | 0. 087      | 1350 | 2742 | 4240  |
| MSTRG. 23873. 1  | noncoding | -0. 016384  | 624  | 702  | 1697  |
| MSTRG. 23872. 8  | noncoding | -0. 0643072 | 1443 | 1704 | 4604  |
| MSTRG. 23872. 9  | coding    | 0. 192      | 0    | 465  | 1252  |
| MSTRG. 23875. 1  | noncoding | -0. 057344  | 501  | 582  | 1336  |
| MSTRG. 23872. 10 | coding    | 0. 092      | 0    | 786  | 5678  |
| MSTRG. 23877. 6  | coding    | 0. 092      | 3153 | 4611 | 9051  |
| MSTRG. 23878. 2  | noncoding | -0. 045056  | 5910 | 6123 | 7808  |
| MSTRG. 23879. 2  | coding    | 0. 06       | 0    | 1551 | 2650  |
| MSTRG. 23879. 3  | noncoding | -0. 0536576 | 0    | 603  | 2738  |
| MSTRG. 23879. 4  | noncoding | -0. 0851968 | 501  | 807  | 3751  |
| MSTRG. 23880. 1  | coding    | 0. 239      | 57   | 1986 | 10158 |
| MSTRG. 23880. 3  | coding    | 0. 233      | 81   | 1971 | 2810  |
| MSTRG. 23881. 3  | coding    | 0. 238      | 414  | 1929 | 3036  |
| MSTRG. 23881. 5  | coding    | 0. 238      | 702  | 2217 | 3299  |
| MSTRG. 23883. 1  | noncoding | -0. 126976  | 144  | 180  | 549   |
| MSTRG. 23840. 2  | coding    | 0. 526      | 126  | 738  | 891   |
| MSTRG. 23890. 1  | coding    | 0. 121      | 1182 | 1452 | 3732  |
| MSTRG. 23894. 3  | coding    | 0. 465      | 162  | 2013 | 2228  |
| MSTRG. 23898. 2  | coding    | 0. 256      | 744  | 2511 | 2763  |
| MSTRG. 23927. 1  | noncoding | -0. 012288  | 927  | 1017 | 1217  |
| MSTRG. 23929. 1  | noncoding | -0. 0004096 | 0    | 0    | 372   |
| MSTRG. 23931. 3  | coding    | 0. 124      | 597  | 1878 | 2644  |
| MSTRG. 23933. 2  | noncoding | -0. 1191936 | 51   | 300  | 1095  |
| MSTRG. 23944. 2  | noncoding | -0. 053248  | 270  | 276  | 885   |
| MSTRG. 23946. 1  | noncoding | -0. 1060864 | 0    | 120  | 385   |
| MSTRG. 23947. 1  | coding    | 0. 124      | 459  | 2835 | 3059  |
| MSTRG. 23947. 2  | noncoding | -0. 0299008 | 87   | 294  | 11349 |
| MSTRG. 23949. 1  | coding    | 0. 501      | 0    | 1806 | 6992  |
| MSTRG. 23949. 2  | coding    | 0. 497      | 0    | 1863 | 5610  |
| MSTRG. 23950. 1  | noncoding | -0. 008192  | 219  | 351  | 630   |
| MSTRG. 23950. 2  | noncoding | -0. 004096  | 1494 | 1749 | 1975  |
| MSTRG. 23952. 2  | coding    | 0. 096      | 243  | 1566 | 2607  |
| MSTRG. 23952. 3  | coding    | 0. 103      | 525  | 1938 | 2979  |
| MSTRG. 23952. 5  | coding    | 0. 107      | 201  | 1497 | 1650  |
| MSTRG. 23952. 4  | coding    | 0. 1        | 243  | 1449 | 1602  |
| MSTRG. 23954. 3  | coding    | 0. 393      | 87   | 1587 | 4033  |
| MSTRG. 23954. 5  | coding    | 0. 393      | 198  | 1695 | 7173  |
| MSTRG. 23962. 5  | coding    | 0. 276      | 0    | 387  | 2357  |
| MSTRG. 23962. 8  | coding    | 0. 177      | 0    | 609  | 23170 |

|                  |           |             |       |       |       |
|------------------|-----------|-------------|-------|-------|-------|
| MSTRG. 23962. 4  | coding    | 0. 272      | 0     | 357   | 9174  |
| MSTRG. 23962. 6  | coding    | 0. 265      | 0     | 441   | 2413  |
| MSTRG. 23962. 1  | coding    | 0. 282      | 0     | 708   | 11572 |
| MSTRG. 23962. 3  | coding    | 0. 321      | 0     | 936   | 5889  |
| MSTRG. 23963. 1  | noncoding | -0. 0638976 | 11472 | 11871 | 14072 |
| MSTRG. 23964. 1  | noncoding | -0. 008192  | 2382  | 2511  | 8499  |
| MSTRG. 23962. 11 | noncoding | -0. 0208896 | 8349  | 8538  | 9497  |
| MSTRG. 23962. 12 | noncoding | -0. 0004096 | 3288  | 3429  | 5551  |
| MSTRG. 23965. 1  | noncoding | -0. 0528384 | 7023  | 7410  | 17817 |
| MSTRG. 23966. 1  | coding    | 0. 042      | 501   | 678   | 2803  |
| MSTRG. 23962. 13 | noncoding | -0. 0335872 | 11019 | 11622 | 21803 |
| MSTRG. 23967. 1  | noncoding | -0. 0868352 | 6858  | 7125  | 7279  |
| MSTRG. 23968. 1  | noncoding | -0. 0663552 | 0     | 627   | 18607 |
| MSTRG. 23958. 1  | noncoding | -0. 004096  | 267   | 393   | 1005  |
| MSTRG. 23970. 2  | coding    | 0. 489      | 0     | 198   | 1319  |
| MSTRG. 23976. 1  | coding    | 0. 417      | 0     | 1632  | 1988  |
| MSTRG. 23977. 1  | coding    | 0. 525      | 18    | 1392  | 1602  |
| MSTRG. 23981. 3  | coding    | 0. 259      | 24    | 4929  | 5736  |
| MSTRG. 23981. 4  | coding    | 0. 246      | 0     | 1800  | 2693  |
| MSTRG. 23981. 5  | coding    | 0. 121      | 102   | 1710  | 2597  |
| MSTRG. 23981. 6  | coding    | 0. 26       | 0     | 4851  | 5735  |
| MSTRG. 23981. 7  | coding    | 0. 254      | 573   | 5385  | 6147  |
| MSTRG. 23981. 8  | coding    | 0. 351      | 2040  | 5808  | 8219  |
| MSTRG. 23983. 4  | coding    | 0. 458      | 1896  | 3009  | 3240  |
| MSTRG. 23983. 3  | coding    | 0. 459      | 1842  | 3288  | 3519  |
| MSTRG. 23998. 5  | coding    | 0. 222      | 78    | 4509  | 4665  |
| MSTRG. 23998. 6  | coding    | 0. 219      | 285   | 4740  | 4896  |
| MSTRG. 23998. 7  | coding    | 0. 221      | 171   | 4611  | 4767  |
| MSTRG. 23999. 11 | noncoding | -0. 04096   | 1368  | 1461  | 2041  |
| MSTRG. 24000. 2  | noncoding | -0. 0540672 | 0     | 459   | 775   |
| MSTRG. 24004. 1  | noncoding | -0. 090112  | 663   | 672   | 1019  |
| MSTRG. 23986. 1  | noncoding | -0. 135168  | 0     | 156   | 1003  |
| MSTRG. 23986. 2  | noncoding | -0. 1376256 | 0     | 141   | 498   |
| MSTRG. 23987. 2  | noncoding | -0. 0741376 | 2367  | 2751  | 2905  |
| MSTRG. 23988. 1  | noncoding | -0. 036864  | 2385  | 2448  | 4176  |
| MSTRG. 23988. 2  | coding    | 0. 11       | 489   | 720   | 13815 |
| MSTRG. 23989. 1  | noncoding | -0. 032768  | 1593  | 1749  | 3918  |
| MSTRG. 23988. 3  | coding    | 0. 011      | 1833  | 2067  | 5680  |
| MSTRG. 23988. 4  | coding    | 0. 116      | 3813  | 4056  | 11152 |
| MSTRG. 23990. 1  | coding    | 0. 046      | 2376  | 2955  | 3808  |
| MSTRG. 23990. 2  | noncoding | -0. 0397312 | 5076  | 5253  | 7354  |
| MSTRG. 23990. 3  | coding    | 0. 074      | 5562  | 5775  | 9006  |
| MSTRG. 23991. 1  | coding    | 0. 055      | 1038  | 1581  | 6206  |
| MSTRG. 23992. 1  | coding    | 0. 109      | 828   | 1239  | 1559  |
| MSTRG. 23984. 1  | noncoding | -0. 0106496 | 2331  | 2484  | 3352  |
| MSTRG. 23995. 1  | coding    | 0. 107      | 0     | 2946  | 3919  |
| MSTRG. 23995. 4  | coding    | 0. 066      | 786   | 1041  | 2296  |
| MSTRG. 23996. 4  | noncoding | -0. 0475136 | 78    | 297   | 764   |
| MSTRG. 23997. 1  | noncoding | -0. 004096  | 414   | 558   | 1196  |
| MSTRG. 24007. 1  | noncoding | -0. 0458752 | 60    | 354   | 1015  |
| MSTRG. 24020. 1  | coding    | 0. 156      | 144   | 5427  | 6384  |
| MSTRG. 24020. 3  | noncoding | -0. 0028672 | 987   | 1140  | 1718  |
| MSTRG. 24020. 4  | noncoding | -0. 0028672 | 987   | 1140  | 1586  |
| MSTRG. 24023. 1  | noncoding | -0. 1609728 | 615   | 642   | 1156  |

|                |           |            |      |      |       |
|----------------|-----------|------------|------|------|-------|
| MSTRG.24022.3  | noncoding | -0.0180224 | 1797 | 1908 | 3388  |
| MSTRG.24026.3  | coding    | 0.105      | 1389 | 2328 | 5238  |
| MSTRG.24026.1  | coding    | 0.156      | 0    | 1203 | 1633  |
| MSTRG.24026.4  | coding    | 0.1        | 177  | 870  | 1284  |
| MSTRG.24027.1  | noncoding | -0.0438272 | 2247 | 2724 | 2879  |
| MSTRG.24011.2  | coding    | 0.054      | 0    | 3369 | 5687  |
| MSTRG.24013.3  | coding    | 0.14       | 282  | 2904 | 3883  |
| MSTRG.24013.5  | coding    | 0.16       | 282  | 3090 | 3782  |
| MSTRG.24014.1  | noncoding | -0.0004096 | 0    | 0    | 230   |
| MSTRG.24015.1  | noncoding | -0.0094208 | 5586 | 5742 | 6974  |
| MSTRG.24016.2  | coding    | 0.041      | 4227 | 4989 | 10263 |
| MSTRG.24017.3  | coding    | 0.255      | 0    | 1782 | 2321  |
| MSTRG.24019.1  | coding    | 0.124      | 81   | 2007 | 6849  |
| MSTRG.24019.2  | coding    | 0.036      | 597  | 720  | 1145  |
| MSTRG.24031.2  | coding    | 0.327      | 0    | 477  | 757   |
| MSTRG.24035.1  | coding    | 0.098      | 0    | 4719 | 6824  |
| MSTRG.24035.3  | noncoding | -0.08192   | 9    | 96   | 675   |
| MSTRG.24036.1  | noncoding | -0.086016  | 801  | 810  | 2215  |
| MSTRG.24037.1  | noncoding | -0.028672  | 516  | 618  | 1004  |
| MSTRG.24049.1  | coding    | 0.108      | 168  | 2400 | 3001  |
| MSTRG.24049.2  | coding    | 0.108      | 135  | 2427 | 3019  |
| MSTRG.24049.8  | coding    | 0.104      | 366  | 2610 | 3211  |
| MSTRG.24049.9  | coding    | 0.113      | 12   | 2316 | 2916  |
| MSTRG.24049.10 | coding    | 0.103      | 30   | 2283 | 2876  |
| MSTRG.24049.12 | coding    | 0.097      | 3237 | 4593 | 5192  |
| MSTRG.24050.2  | coding    | 0.379      | 144  | 741  | 1367  |
| MSTRG.24050.3  | coding    | 0.343      | 186  | 924  | 1570  |
| MSTRG.24051.1  | noncoding | -0.0585728 | 0    | 408  | 1062  |
| MSTRG.24041.2  | coding    | 0.319      | 0    | 1728 | 2404  |
| MSTRG.24057.3  | coding    | 0.185      | 48   | 1359 | 2033  |
| MSTRG.24057.4  | coding    | 0.185      | 612  | 1923 | 2660  |
| MSTRG.24058.1  | noncoding | -0.069632  | 1254 | 1275 | 1958  |
| MSTRG.24058.2  | noncoding | -0.053248  | 48   | 132  | 471   |
| MSTRG.24062.1  | coding    | 0.171      | 0    | 4032 | 6577  |
| MSTRG.24062.5  | coding    | 0.177      | 0    | 3801 | 4491  |
| MSTRG.24062.6  | coding    | 0.177      | 0    | 3798 | 4488  |
| MSTRG.24062.8  | coding    | 0.166      | 432  | 4353 | 4904  |
| MSTRG.24062.9  | coding    | 0.165      | 309  | 4239 | 4789  |
| MSTRG.24059.1  | coding    | 0.113      | 1515 | 1701 | 2434  |
| MSTRG.24059.3  | coding    | 0.113      | 1029 | 1215 | 1918  |
| MSTRG.24059.4  | coding    | 0.113      | 1077 | 1263 | 1822  |
| MSTRG.24063.1  | noncoding | -0.0937984 | 174  | 738  | 2051  |
| MSTRG.24063.2  | noncoding | -0.0954368 | 174  | 741  | 2054  |
| MSTRG.24063.3  | noncoding | -0.1028096 | 0    | 513  | 1976  |
| MSTRG.24063.6  | noncoding | -0.098304  | 537  | 909  | 2022  |
| MSTRG.24071.2  | coding    | 0.14       | 18   | 432  | 645   |
| MSTRG.24071.1  | coding    | 0.193      | 0    | 438  | 1028  |
| MSTRG.24081.1  | coding    | 0.444      | 999  | 1905 | 3311  |
| MSTRG.24081.2  | coding    | 0.445      | 999  | 1905 | 3311  |
| MSTRG.24081.9  | coding    | 0.44       | 981  | 1863 | 2029  |
| MSTRG.24081.5  | coding    | 0.442      | 999  | 1905 | 2070  |
| MSTRG.24081.7  | coding    | 0.208      | 258  | 2445 | 2611  |
| MSTRG.24081.10 | coding    | 0.44       | 954  | 1863 | 2021  |
| MSTRG.24075.2  | coding    | 0.489      | 0    | 369  | 1090  |

|                  |           |             |      |       |       |
|------------------|-----------|-------------|------|-------|-------|
| MSTRG. 24082. 1  | coding    | 0. 265      | 123  | 2865  | 5438  |
| MSTRG. 24082. 4  | coding    | 0. 267      | 132  | 2784  | 3317  |
| MSTRG. 24082. 3  | coding    | 0. 263      | 711  | 3408  | 3941  |
| MSTRG. 24086. 1  | coding    | 0. 551      | 0    | 2682  | 3185  |
| MSTRG. 24093. 3  | coding    | 0. 314      | 2190 | 2697  | 4143  |
| MSTRG. 24095. 3  | coding    | 0. 38       | 1194 | 4125  | 4588  |
| MSTRG. 24095. 2  | coding    | 0. 31       | 0    | 3813  | 4275  |
| MSTRG. 24098. 3  | coding    | 0. 072      | 0    | 1392  | 1855  |
| MSTRG. 24098. 4  | coding    | 0. 117      | 0    | 1038  | 1501  |
| MSTRG. 24099. 1  | noncoding | -0. 0196608 | 549  | 585   | 867   |
| MSTRG. 24102. 1  | noncoding | -0. 126976  | 534  | 579   | 881   |
| MSTRG. 24104. 1  | noncoding | -0. 0094208 | 1245 | 1401  | 1590  |
| MSTRG. 24105. 1  | noncoding | -0. 0176128 | 297  | 432   | 1049  |
| MSTRG. 24105. 2  | noncoding | -0. 057344  | 228  | 270   | 532   |
| MSTRG. 24107. 1  | noncoding | -0. 0004096 | 408  | 516   | 1110  |
| MSTRG. 24108. 1  | noncoding | -0. 0004096 | 0    | 0     | 278   |
| MSTRG. 24111. 2  | coding    | 0. 561      | 0    | 465   | 5173  |
| MSTRG. 24112. 1  | noncoding | -0. 0172032 | 225  | 384   | 1533  |
| MSTRG. 24113. 3  | coding    | 0. 436      | 0    | 696   | 1253  |
| MSTRG. 24114. 2  | coding    | 0. 234      | 555  | 1500  | 3298  |
| MSTRG. 24115. 1  | coding    | 0. 547      | 0    | 1119  | 2511  |
| MSTRG. 24115. 3  | coding    | 0. 562      | 0    | 1071  | 1225  |
| MSTRG. 24117. 2  | coding    | 0. 268      | 207  | 1191  | 2835  |
| MSTRG. 24117. 3  | coding    | 0. 248      | 57   | 1356  | 2967  |
| MSTRG. 24125. 1  | noncoding | -0. 055296  | 15   | 126   | 1231  |
| MSTRG. 24125. 2  | noncoding | -0. 0004096 | 0    | 0     | 347   |
| MSTRG. 24123. 1  | coding    | 0. 293      | 0    | 1122  | 2327  |
| MSTRG. 24127. 1  | coding    | 0. 278      | 2013 | 3069  | 5831  |
| MSTRG. 24134. 2  | coding    | 0. 144      | 399  | 1143  | 1487  |
| MSTRG. 24135. 4  | coding    | 0. 037      | 804  | 1482  | 3663  |
| MSTRG. 24135. 2  | coding    | 0. 043      | 0    | 2079  | 3207  |
| MSTRG. 24135. 6  | coding    | 0. 037      | 1419 | 2097  | 2485  |
| MSTRG. 24136. 8  | coding    | 0. 197      | 861  | 1197  | 1744  |
| MSTRG. 24136. 9  | coding    | 0. 225      | 0    | 435   | 982   |
| MSTRG. 24139. 1  | noncoding | -0. 026624  | 471  | 687   | 1321  |
| MSTRG. 24140. 1  | noncoding | -0. 0090112 | 135  | 216   | 811   |
| MSTRG. 24147. 2  | coding    | 0. 585      | 0    | 1785  | 7718  |
| MSTRG. 24173. 1  | coding    | 0. 081      | 4383 | 9267  | 12993 |
| MSTRG. 24173. 3  | coding    | 0. 076      | 0    | 8706  | 9716  |
| MSTRG. 24173. 4  | coding    | 0. 073      | 1122 | 8637  | 12315 |
| MSTRG. 24173. 2  | coding    | 0. 076      | 6    | 8895  | 12572 |
| MSTRG. 24173. 6  | coding    | 0. 079      | 0    | 8703  | 12023 |
| MSTRG. 24173. 7  | coding    | 0. 077      | 0    | 8766  | 9660  |
| MSTRG. 24173. 5  | coding    | 0. 076      | 0    | 8868  | 9846  |
| MSTRG. 24173. 10 | coding    | 0. 074      | 2727 | 10647 | 11525 |
| MSTRG. 24173. 8  | coding    | 0. 076      | 69   | 8955  | 12586 |
| MSTRG. 24173. 9  | coding    | 0. 077      | 69   | 8895  | 9774  |
| MSTRG. 24173. 13 | coding    | 0. 076      | 0    | 8736  | 12042 |
| MSTRG. 24173. 14 | coding    | 0. 073      | 714  | 8229  | 11534 |
| MSTRG. 24173. 11 | coding    | 0. 078      | 0    | 8805  | 12108 |
| MSTRG. 24173. 12 | coding    | 0. 076      | 0    | 8865  | 12168 |
| MSTRG. 24173. 15 | coding    | 0. 071      | 1026 | 8505  | 12135 |
| MSTRG. 24173. 16 | coding    | 0. 079      | 0    | 8496  | 9369  |
| MSTRG. 24173. 17 | coding    | 0. 079      | 0    | 8556  | 8785  |

|                  |           |             |       |       |       |
|------------------|-----------|-------------|-------|-------|-------|
| MSTRG. 24175. 1  | noncoding | -0. 0049152 | 246   | 393   | 763   |
| MSTRG. 24148. 2  | noncoding | -0. 06144   | 2406  | 2556  | 2711  |
| MSTRG. 24152. 1  | noncoding | -0. 0196608 | 312   | 513   | 1155  |
| MSTRG. 24162. 1  | noncoding | -0. 106496  | 3     | 33    | 1183  |
| MSTRG. 24163. 1  | noncoding | -0. 004096  | 4092  | 4179  | 4900  |
| MSTRG. 24164. 1  | noncoding | -0. 06144   | 348   | 774   | 1064  |
| MSTRG. 24163. 2  | coding    | 0. 064      | 1086  | 2448  | 3222  |
| MSTRG. 24163. 4  | noncoding | -0. 0790528 | 13914 | 14310 | 15155 |
| MSTRG. 24163. 5  | noncoding | -0. 0815104 | 210   | 630   | 1476  |
| MSTRG. 24163. 6  | noncoding | -0. 004096  | 609   | 696   | 2223  |
| MSTRG. 24158. 1  | coding    | 0. 474      | 144   | 1185  | 2160  |
| MSTRG. 24153. 1  | coding    | 0. 419      | 0     | 732   | 900   |
| MSTRG. 24168. 1  | coding    | 0. 081      | 60    | 690   | 874   |
| MSTRG. 24171. 1  | noncoding | -0. 0323584 | 444   | 609   | 1898  |
| MSTRG. 24172. 1  | coding    | 0. 296      | 0     | 6636  | 11485 |
| MSTRG. 24172. 2  | coding    | 0. 297      | 0     | 6651  | 6808  |
| MSTRG. 24184. 1  | coding    | 0. 164      | 231   | 723   | 1301  |
| MSTRG. 24184. 3  | noncoding | -0. 0458752 | 561   | 783   | 938   |
| MSTRG. 24184. 4  | noncoding | -0. 0815104 | 0     | 246   | 778   |
| MSTRG. 24185. 3  | coding    | 0. 395      | 222   | 2199  | 2908  |
| MSTRG. 24187. 1  | coding    | 0. 342      | 750   | 1569  | 1982  |
| MSTRG. 24187. 2  | coding    | 0. 342      | 333   | 1152  | 1556  |
| MSTRG. 24187. 3  | coding    | 0. 325      | 450   | 1167  | 1555  |
| MSTRG. 24187. 4  | coding    | 0. 342      | 450   | 1269  | 1589  |
| MSTRG. 24187. 5  | coding    | 0. 301      | 450   | 984   | 1350  |
| MSTRG. 24183. 1  | noncoding | -0. 012288  | 306   | 342   | 497   |
| MSTRG. 24190. 6  | coding    | 0. 295      | 4416  | 5220  | 6681  |
| MSTRG. 24195. 1  | noncoding | -0. 0167936 | 129   | 165   | 497   |
| MSTRG. 24197. 1  | coding    | 0. 094      | 0     | 210   | 3126  |
| MSTRG. 24198. 1  | coding    | 0. 147      | 213   | 2880  | 12138 |
| MSTRG. 24198. 2  | coding    | 0. 147      | 2385  | 5052  | 9187  |
| MSTRG. 24201. 3  | coding    | 0. 461      | 222   | 2355  | 3323  |
| MSTRG. 24204. 4  | coding    | 0. 512      | 0     | 1587  | 2528  |
| MSTRG. 24209. 1  | coding    | 0. 148      | 3549  | 4662  | 5332  |
| MSTRG. 24209. 3  | coding    | 0. 093      | 330   | 4341  | 5011  |
| MSTRG. 24209. 4  | coding    | 0. 148      | 2751  | 3864  | 4532  |
| MSTRG. 24211. 2  | coding    | 0. 126      | 0     | 1569  | 5590  |
| MSTRG. 24211. 3  | coding    | 0. 044      | 2682  | 3681  | 6853  |
| MSTRG. 24212. 1  | noncoding | -0. 0004096 | 0     | 0     | 2211  |
| MSTRG. 24207. 5  | coding    | 0. 102      | 0     | 372   | 2783  |
| MSTRG. 24207. 4  | coding    | 0. 104      | 0     | 423   | 3975  |
| MSTRG. 24215. 1  | noncoding | -0. 0126976 | 1437  | 1659  | 2081  |
| MSTRG. 24214. 3  | coding    | 0. 461      | 102   | 2529  | 4974  |
| MSTRG. 24214. 4  | coding    | 0. 453      | 69    | 2160  | 4606  |
| MSTRG. 24216. 1  | coding    | 0. 324      | 0     | 474   | 2303  |
| MSTRG. 24222. 1  | noncoding | -0. 016384  | 735   | 840   | 1101  |
| MSTRG. 24223. 1  | noncoding | -0. 0483328 | 2625  | 2787  | 4498  |
| MSTRG. 24224. 1  | coding    | 0. 337      | 0     | 921   | 5024  |
| MSTRG. 24225. 2  | coding    | 0. 405      | 216   | 3399  | 3607  |
| MSTRG. 24228. 5  | coding    | 0. 328      | 0     | 711   | 1958  |
| MSTRG. 24228. 6  | coding    | 0. 342      | 0     | 642   | 1887  |
| MSTRG. 24228. 7  | coding    | 0. 346      | 0     | 411   | 566   |
| MSTRG. 24229. 7  | coding    | 0. 35       | 285   | 2586  | 3441  |
| MSTRG. 24229. 10 | coding    | 0. 317      | 201   | 573   | 2573  |



|                 |           |             |      |      |       |
|-----------------|-----------|-------------|------|------|-------|
| MSTRG. 24218. 3 | coding    | 0. 283      | 261  | 633  | 977   |
| MSTRG. 24230. 2 | coding    | 0. 213      | 0    | 735  | 1731  |
| MSTRG. 24232. 3 | coding    | 0. 191      | 180  | 615  | 9934  |
| MSTRG. 24233. 3 | coding    | 0. 549      | 0    | 3390 | 4145  |
| MSTRG. 24236. 3 | coding    | 0. 364      | 273  | 801  | 2182  |
| MSTRG. 24252. 5 | coding    | 0. 47       | 1965 | 3429 | 4853  |
| MSTRG. 24252. 6 | coding    | 0. 355      | 1344 | 5526 | 5721  |
| MSTRG. 24252. 7 | coding    | 0. 27       | 105  | 426  | 1148  |
| MSTRG. 24252. 8 | coding    | 0. 288      | 0    | 2856 | 6677  |
| MSTRG. 24252. 9 | coding    | 0. 269      | 54   | 2916 | 6407  |
| MSTRG. 24250. 1 | coding    | 0. 396      | 276  | 2064 | 4991  |
| MSTRG. 24250. 3 | coding    | 0. 402      | 261  | 1173 | 4125  |
| MSTRG. 24250. 5 | coding    | 0. 402      | 660  | 1572 | 4482  |
| MSTRG. 24250. 8 | coding    | 0. 394      | 0    | 1653 | 4562  |
| MSTRG. 24250. 4 | coding    | 0. 391      | 96   | 1758 | 4710  |
| MSTRG. 24250. 2 | coding    | 0. 391      | 198  | 1860 | 4814  |
| MSTRG. 24250. 7 | coding    | 0. 389      | 207  | 1827 | 4781  |
| MSTRG. 24257. 5 | noncoding | -0. 0405504 | 0    | 528  | 4079  |
| MSTRG. 24257. 4 | coding    | 0. 066      | 480  | 1647 | 5356  |
| MSTRG. 24257. 3 | coding    | 0. 066      | 480  | 1647 | 5634  |
| MSTRG. 24258. 5 | coding    | 0. 603      | 3    | 3996 | 5359  |
| MSTRG. 24258. 4 | coding    | 0. 603      | 1497 | 5484 | 6847  |
| MSTRG. 24260. 1 | coding    | 0. 271      | 0    | 582  | 737   |
| MSTRG. 24262. 1 | noncoding | -0. 04096   | 24   | 99   | 386   |
| MSTRG. 24265. 2 | noncoding | -0. 0831488 | 816  | 825  | 1476  |
| MSTRG. 24265. 3 | noncoding | -0. 0831488 | 816  | 825  | 1401  |
| MSTRG. 24265. 5 | noncoding | -0. 0831488 | 768  | 777  | 1409  |
| MSTRG. 24265. 6 | noncoding | -0. 0831488 | 762  | 771  | 1261  |
| MSTRG. 24268. 2 | coding    | 0. 276      | 129  | 1212 | 1682  |
| MSTRG. 24269. 3 | noncoding | -0. 0200704 | 504  | 663  | 912   |
| MSTRG. 24269. 2 | coding    | 0. 287      | 0    | 804  | 959   |
| MSTRG. 24273. 1 | coding    | 0. 168      | 0    | 999  | 5113  |
| MSTRG. 24275. 2 | coding    | 0. 404      | 0    | 1770 | 3846  |
| MSTRG. 24276. 2 | coding    | 0. 55       | 0    | 3045 | 4376  |
| MSTRG. 24276. 3 | coding    | 0. 562      | 0    | 2940 | 3807  |
| MSTRG. 24285. 2 | coding    | 0. 334      | 498  | 5598 | 8166  |
| MSTRG. 24285. 3 | coding    | 0. 365      | 2466 | 6015 | 8568  |
| MSTRG. 24286. 2 | noncoding | -0. 038912  | 60   | 447  | 3504  |
| MSTRG. 24286. 3 | coding    | 0. 198      | 30   | 720  | 5319  |
| MSTRG. 24288. 2 | coding    | 0. 118      | 756  | 948  | 1414  |
| MSTRG. 24288. 3 | noncoding | -0. 0131072 | 3153 | 3258 | 8437  |
| MSTRG. 24288. 4 | noncoding | -0. 008192  | 9087 | 9192 | 12506 |
| MSTRG. 24283. 3 | coding    | 0. 239      | 12   | 429  | 806   |
| MSTRG. 24283. 5 | coding    | 0. 372      | 0    | 2313 | 3359  |
| MSTRG. 24283. 6 | coding    | 0. 472      | 0    | 1776 | 1930  |
| MSTRG. 24282. 2 | coding    | 0. 248      | 324  | 708  | 865   |
| MSTRG. 24289. 3 | coding    | 0. 44       | 114  | 789  | 1646  |
| MSTRG. 24289. 2 | coding    | 0. 222      | 225  | 1704 | 2562  |
| MSTRG. 24290. 3 | coding    | 0. 328      | 66   | 1053 | 1603  |
| MSTRG. 24291. 1 | coding    | 0. 175      | 96   | 909  | 1242  |
| MSTRG. 24296. 1 | noncoding | -0. 1277952 | 102  | 504  | 3068  |
| MSTRG. 24297. 2 | noncoding | -0. 0446464 | 360  | 660  | 1142  |
| MSTRG. 24297. 1 | coding    | 0. 163      | 876  | 3471 | 4959  |
| MSTRG. 24297. 3 | coding    | 0. 158      | 870  | 3555 | 5045  |

|                 |           |             |      |      |      |
|-----------------|-----------|-------------|------|------|------|
| MSTRG. 24297. 6 | coding    | 0. 163      | 762  | 3357 | 4801 |
| MSTRG. 24297. 9 | coding    | 0. 158      | 3078 | 5763 | 7251 |
| MSTRG. 24295. 1 | noncoding | -0. 18432   | 606  | 654  | 809  |
| MSTRG. 24302. 1 | noncoding | -0. 0135168 | 549  | 684  | 1210 |
| MSTRG. 24303. 1 | coding    | 0. 446      | 132  | 2313 | 5891 |
| MSTRG. 24313. 2 | coding    | 0. 179      | 840  | 3189 | 5874 |
| MSTRG. 24315. 1 | noncoding | -0. 075776  | 4989 | 5175 | 5331 |
| MSTRG. 24314. 2 | coding    | 0. 087      | 210  | 1626 | 3762 |
| MSTRG. 24318. 1 | coding    | 0. 325      | 6    | 3693 | 5751 |
| MSTRG. 24318. 2 | coding    | 0. 328      | 6    | 3621 | 5679 |
| MSTRG. 24318. 3 | coding    | 0. 315      | 438  | 3432 | 5490 |
| MSTRG. 24318. 4 | coding    | 0. 315      | 1509 | 4494 | 6554 |
| MSTRG. 24306. 2 | coding    | 0. 359      | 675  | 2364 | 2535 |
| MSTRG. 24306. 3 | coding    | 0. 435      | 0    | 1626 | 1796 |
| MSTRG. 24307. 1 | coding    | 0. 41       | 0    | 447  | 621  |
| MSTRG. 24307. 2 | coding    | 0. 357      | 534  | 1023 | 1361 |
| MSTRG. 24307. 3 | coding    | 0. 353      | 414  | 942  | 1115 |
| MSTRG. 24307. 4 | coding    | 0. 43       | 0    | 537  | 719  |
| MSTRG. 24309. 1 | coding    | 0. 319      | 0    | 978  | 1573 |
| MSTRG. 24305. 1 | noncoding | -0. 0958464 | 0    | 951  | 1498 |
| MSTRG. 24304. 4 | coding    | 0. 378      | 48   | 633  | 846  |
| MSTRG. 24328. 2 | coding    | 0. 458      | 270  | 3060 | 4983 |
| MSTRG. 24328. 5 | coding    | 0. 123      | 3741 | 3963 | 4502 |
| MSTRG. 24328. 7 | noncoding | -0. 0585728 | 4503 | 5139 | 6151 |
| MSTRG. 24328. 8 | coding    | 0. 425      | 4035 | 7149 | 9078 |
| MSTRG. 24336. 3 | noncoding | -0. 0815104 | 102  | 468  | 647  |
| MSTRG. 24338. 6 | coding    | 0. 504      | 0    | 2355 | 2519 |
| MSTRG. 24339. 1 | coding    | 0. 406      | 3    | 1890 | 2143 |
| MSTRG. 24340. 1 | noncoding | -0. 0192512 | 228  | 735  | 955  |
| MSTRG. 24341. 3 | coding    | 0. 359      | 0    | 2178 | 2848 |
| MSTRG. 24344. 1 | noncoding | -0. 0151552 | 54   | 216  | 749  |
| MSTRG. 24346. 1 | coding    | 0. 198      | 9    | 852  | 1167 |
| MSTRG. 24346. 6 | coding    | 0. 203      | 0    | 930  | 1276 |
| MSTRG. 24346. 2 | coding    | 0. 239      | 0    | 849  | 1237 |
| MSTRG. 24346. 3 | coding    | 0. 195      | 456  | 1344 | 1733 |
| MSTRG. 24346. 5 | coding    | 0. 168      | 462  | 1464 | 1853 |
| MSTRG. 24346. 4 | coding    | 0. 183      | 462  | 1410 | 1809 |
| MSTRG. 24346. 7 | coding    | 0. 184      | 441  | 1404 | 1802 |
| MSTRG. 24348. 3 | coding    | 0. 237      | 291  | 909  | 1596 |
| MSTRG. 24350. 3 | coding    | 0. 457      | 0    | 2820 | 5157 |
| MSTRG. 24350. 4 | coding    | 0. 383      | 2655 | 5586 | 6076 |
| MSTRG. 24350. 5 | coding    | 0. 44       | 0    | 3660 | 4777 |
| MSTRG. 24351. 7 | coding    | 0. 198      | 0    | 1452 | 2538 |
| MSTRG. 24351. 5 | coding    | 0. 192      | 0    | 1548 | 3022 |
| MSTRG. 24351. 4 | coding    | 0. 198      | 0    | 1452 | 3165 |
| MSTRG. 24351. 1 | coding    | 0. 198      | 0    | 1452 | 3218 |
| MSTRG. 24351. 3 | coding    | 0. 249      | 0    | 4104 | 4259 |
| MSTRG. 24351. 2 | coding    | 0. 357      | 2205 | 4539 | 4694 |
| MSTRG. 24352. 1 | noncoding | -0. 0602112 | 1341 | 1872 | 2865 |
| MSTRG. 24356. 3 | noncoding | -0. 1150976 | 261  | 918  | 1087 |
| MSTRG. 24357. 1 | coding    | 0. 309      | 684  | 2169 | 2327 |
| MSTRG. 24357. 3 | coding    | 0. 262      | 951  | 2424 | 2580 |
| MSTRG. 24358. 5 | coding    | 0. 109      | 6    | 3789 | 3950 |
| MSTRG. 24364. 1 | coding    | 0. 311      | 0    | 1071 | 1663 |

|                  |           |             |      |       |       |
|------------------|-----------|-------------|------|-------|-------|
| MSTRG. 24365. 4  | coding    | 0. 424      | 276  | 6270  | 6521  |
| MSTRG. 24365. 8  | coding    | 0. 439      | 276  | 5892  | 6458  |
| MSTRG. 24365. 9  | coding    | 0. 449      | 276  | 5787  | 6353  |
| MSTRG. 24365. 10 | coding    | 0. 425      | 276  | 6279  | 6558  |
| MSTRG. 24365. 11 | coding    | 0. 439      | 276  | 5892  | 6485  |
| MSTRG. 24365. 6  | coding    | 0. 425      | 276  | 6300  | 6579  |
| MSTRG. 24365. 3  | coding    | 0. 438      | 276  | 5913  | 6575  |
| MSTRG. 24365. 5  | coding    | 0. 439      | 276  | 5892  | 6554  |
| MSTRG. 24365. 1  | coding    | 0. 438      | 276  | 5892  | 6388  |
| MSTRG. 24365. 12 | coding    | 0. 426      | 276  | 6207  | 6491  |
| MSTRG. 24365. 13 | coding    | 0. 423      | 273  | 6267  | 6519  |
| MSTRG. 24365. 14 | coding    | 0. 436      | 273  | 5997  | 6563  |
| MSTRG. 24366. 1  | noncoding | -0. 0311296 | 201  | 228   | 408   |
| MSTRG. 24367. 1  | noncoding | -0. 008192  | 0    | 66    | 235   |
| MSTRG. 24374. 2  | coding    | 0. 3        | 564  | 1818  | 2439  |
| MSTRG. 24376. 1  | coding    | 0. 202      | 363  | 963   | 1689  |
| MSTRG. 24376. 2  | coding    | 0. 16       | 0    | 585   | 1308  |
| MSTRG. 24376. 5  | coding    | 0. 223      | 336  | 846   | 1571  |
| MSTRG. 24376. 6  | coding    | 0. 212      | 1350 | 1668  | 2394  |
| MSTRG. 24378. 4  | coding    | 0. 198      | 48   | 570   | 4574  |
| MSTRG. 24378. 5  | coding    | 0. 185      | 129  | 618   | 947   |
| MSTRG. 24379. 1  | coding    | 0. 155      | 843  | 1716  | 1887  |
| MSTRG. 24379. 2  | coding    | 0. 155      | 516  | 1389  | 1561  |
| MSTRG. 24380. 1  | noncoding | -0. 0249856 | 249  | 450   | 858   |
| MSTRG. 24359. 2  | coding    | 0. 41       | 0    | 765   | 4222  |
| MSTRG. 24359. 3  | coding    | 0. 382      | 645  | 1494  | 4849  |
| MSTRG. 24361. 2  | coding    | 0. 265      | 765  | 1623  | 1779  |
| MSTRG. 24382. 5  | coding    | 0. 376      | 1755 | 6765  | 7775  |
| MSTRG. 24387. 6  | coding    | 0. 204      | 249  | 504   | 679   |
| MSTRG. 24387. 1  | noncoding | -0. 0884736 | 153  | 411   | 587   |
| MSTRG. 24387. 3  | coding    | 0. 274      | 378  | 663   | 839   |
| MSTRG. 24387. 4  | noncoding | -0. 1159168 | 0    | 198   | 400   |
| MSTRG. 24389. 1  | noncoding | -0. 053248  | 2007 | 2085  | 2813  |
| MSTRG. 24387. 7  | noncoding | -0. 057344  | 4125 | 4293  | 5430  |
| MSTRG. 24390. 8  | coding    | 0. 421      | 9    | 5325  | 5982  |
| MSTRG. 24384. 3  | coding    | 0. 389      | 123  | 3531  | 4252  |
| MSTRG. 24384. 2  | coding    | 0. 397      | 3756 | 7446  | 8170  |
| MSTRG. 24397. 1  | noncoding | -0. 0229376 | 0    | 114   | 2620  |
| MSTRG. 24398. 1  | coding    | 0. 131      | 90   | 366   | 667   |
| MSTRG. 24397. 3  | noncoding | -0. 028672  | 102  | 240   | 2533  |
| MSTRG. 24398. 4  | coding    | 0. 381      | 0    | 405   | 706   |
| MSTRG. 24400. 1  | coding    | 0. 361      | 8502 | 10941 | 11455 |
| MSTRG. 24405. 1  | noncoding | -0. 0421888 | 273  | 774   | 2712  |
| MSTRG. 24405. 3  | coding    | 0. 163      | 141  | 1044  | 2703  |
| MSTRG. 24405. 4  | noncoding | -0. 073728  | 141  | 492   | 2824  |
| MSTRG. 24406. 3  | coding    | 0. 247      | 120  | 591   | 758   |
| MSTRG. 24408. 1  | noncoding | -0. 075776  | 1026 | 1419  | 1576  |
| MSTRG. 24408. 2  | noncoding | -0. 0073728 | 420  | 564   | 1067  |
| MSTRG. 24410. 3  | coding    | 0. 182      | 0    | 630   | 6512  |
| MSTRG. 24412. 1  | coding    | 0. 574      | 618  | 4713  | 6272  |
| MSTRG. 24412. 2  | coding    | 0. 466      | 0    | 6378  | 7935  |
| MSTRG. 24413. 1  | noncoding | -0. 0679936 | 663  | 879   | 3676  |
| MSTRG. 24401. 1  | noncoding | -0. 0290816 | 2577 | 2742  | 3282  |
| MSTRG. 24404. 2  | noncoding | -0. 0647168 | 2382 | 3570  | 3862  |

|                  |           |             |      |       |       |
|------------------|-----------|-------------|------|-------|-------|
| MSTRG. 24415. 7  | coding    | 0. 133      | 42   | 483   | 913   |
| MSTRG. 24415. 3  | coding    | 0. 219      | 189  | 828   | 1065  |
| MSTRG. 24415. 5  | coding    | 0. 235      | 408  | 774   | 1010  |
| MSTRG. 24415. 4  | coding    | 0. 244      | 189  | 546   | 784   |
| MSTRG. 24415. 6  | coding    | 0. 231      | 108  | 753   | 990   |
| MSTRG. 24415. 2  | coding    | 0. 27       | 0    | 414   | 652   |
| MSTRG. 24417. 1  | coding    | 0. 442      | 0    | 1617  | 4684  |
| MSTRG. 24417. 6  | coding    | 0. 424      | 1701 | 3012  | 9374  |
| MSTRG. 24417. 5  | coding    | 0. 444      | 0    | 1602  | 7965  |
| MSTRG. 24419. 1  | noncoding | -0. 0897024 | 1143 | 1380  | 3555  |
| MSTRG. 24419. 2  | noncoding | -0. 04096   | 2718 | 2838  | 7764  |
| MSTRG. 24420. 1  | noncoding | -0. 0331776 | 423  | 678   | 1604  |
| MSTRG. 24421. 1  | noncoding | -0. 0843776 | 0    | 1065  | 2958  |
| MSTRG. 24424. 2  | coding    | 0. 091      | 1767 | 2280  | 4290  |
| MSTRG. 24436. 1  | coding    | 0. 606      | 0    | 597   | 1401  |
| MSTRG. 24442. 2  | coding    | 0. 426      | 330  | 13326 | 13692 |
| MSTRG. 24443. 1  | coding    | 0. 142      | 114  | 1032  | 3685  |
| MSTRG. 24429. 7  | noncoding | -0. 118784  | 102  | 111   | 538   |
| MSTRG. 24429. 5  | noncoding | -0. 0233472 | 6    | 330   | 1302  |
| MSTRG. 24429. 6  | noncoding | -0. 0233472 | 6    | 330   | 1120  |
| MSTRG. 24429. 1  | noncoding | -0. 0233472 | 9    | 333   | 970   |
| MSTRG. 24429. 2  | noncoding | -0. 0233472 | 9    | 333   | 1353  |
| MSTRG. 24429. 3  | noncoding | -0. 0233472 | 9    | 333   | 1335  |
| MSTRG. 24429. 4  | noncoding | -0. 0233472 | 9    | 333   | 1213  |
| MSTRG. 24429. 8  | noncoding | -0. 0233472 | 9    | 333   | 803   |
| MSTRG. 24454. 1  | noncoding | -0. 036864  | 855  | 954   | 1674  |
| MSTRG. 24456. 2  | coding    | 0. 219      | 111  | 699   | 1923  |
| MSTRG. 24458. 1  | noncoding | -0. 036864  | 195  | 273   | 433   |
| MSTRG. 24460. 1  | noncoding | -0. 2281472 | 657  | 1068  | 1922  |
| MSTRG. 24460. 2  | noncoding | -0. 1552384 | 96   | 978   | 1831  |
| MSTRG. 24460. 3  | noncoding | -0. 2187264 | 660  | 1032  | 1630  |
| MSTRG. 24460. 4  | noncoding | -0. 1605632 | 657  | 900   | 1498  |
| MSTRG. 24460. 5  | coding    | 0. 282      | 96   | 672   | 2830  |
| MSTRG. 24460. 6  | coding    | 0. 202      | 96   | 429   | 3844  |
| MSTRG. 24461. 1  | noncoding | -0. 086016  | 270  | 354   | 924   |
| MSTRG. 24462. 1  | coding    | 0. 092      | 288  | 600   | 2509  |
| MSTRG. 24464. 3  | coding    | 0. 272      | 114  | 2037  | 3428  |
| MSTRG. 24464. 2  | coding    | 0. 271      | 147  | 1866  | 3257  |
| MSTRG. 24464. 1  | coding    | 0. 244      | 90   | 4065  | 4248  |
| MSTRG. 24465. 1  | coding    | 0. 098      | 831  | 1002  | 4219  |
| MSTRG. 24463. 1  | coding    | 0. 02       | 708  | 2115  | 6640  |
| MSTRG. 24468. 1  | coding    | 0. 179      | 393  | 2619  | 3121  |
| MSTRG. 24468. 2  | coding    | 0. 186      | 0    | 2181  | 5078  |
| MSTRG. 24484. 2  | coding    | 0. 544      | 0    | 684   | 916   |
| MSTRG. 24484. 3  | coding    | 0. 498      | 0    | 456   | 688   |
| MSTRG. 24484. 4  | coding    | 0. 539      | 0    | 684   | 916   |
| MSTRG. 24484. 5  | coding    | 0. 532      | 0    | 684   | 916   |
| MSTRG. 24484. 6  | coding    | 0. 426      | 174  | 1023  | 1253  |
| MSTRG. 24484. 7  | coding    | 0. 551      | 0    | 684   | 916   |
| MSTRG. 24485. 3  | coding    | 0. 227      | 249  | 528   | 919   |
| MSTRG. 24485. 2  | noncoding | -0. 0626688 | 249  | 489   | 887   |
| MSTRG. 24486. 1  | coding    | 0. 303      | 144  | 561   | 839   |
| MSTRG. 24487. 10 | coding    | 0. 279      | 261  | 7554  | 8836  |
| MSTRG. 24487. 3  | coding    | 0. 281      | 153  | 7422  | 8706  |

|                  |           |             |      |      |       |
|------------------|-----------|-------------|------|------|-------|
| MSTRG. 24487. 4  | coding    | 0. 281      | 153  | 7437 | 8721  |
| MSTRG. 24487. 5  | coding    | 0. 283      | 153  | 7335 | 8619  |
| MSTRG. 24487. 6  | coding    | 0. 276      | 153  | 7314 | 8598  |
| MSTRG. 24487. 7  | coding    | 0. 277      | 153  | 7260 | 8544  |
| MSTRG. 24487. 9  | coding    | 0. 28       | 153  | 7398 | 8682  |
| MSTRG. 24487. 8  | coding    | 0. 281      | 153  | 7386 | 10294 |
| MSTRG. 24487. 11 | coding    | 0. 308      | 1740 | 7446 | 10576 |
| MSTRG. 24487. 17 | coding    | 0. 28       | 216  | 7482 | 8764  |
| MSTRG. 24487. 18 | coding    | 0. 281      | 216  | 7485 | 8767  |
| MSTRG. 24487. 19 | coding    | 0. 279      | 216  | 7518 | 8800  |
| MSTRG. 24488. 7  | coding    | 0. 265      | 0    | 843  | 1930  |
| MSTRG. 24488. 10 | coding    | 0. 167      | 1272 | 1845 | 2092  |
| MSTRG. 24488. 8  | coding    | 0. 359      | 0    | 966  | 1215  |
| MSTRG. 24488. 14 | noncoding | -0. 032768  | 858  | 936  | 1112  |
| MSTRG. 24489. 2  | coding    | 0. 228      | 0    | 330  | 1493  |
| MSTRG. 24472. 3  | coding    | 0. 421      | 282  | 3492 | 6447  |
| MSTRG. 24472. 5  | coding    | 0. 466      | 327  | 2643 | 4397  |
| MSTRG. 24477. 1  | coding    | 0. 148      | 678  | 3042 | 3205  |
| MSTRG. 24477. 10 | coding    | 0. 165      | 888  | 2523 | 2684  |
| MSTRG. 24477. 8  | coding    | 0. 191      | 0    | 2595 | 2750  |
| MSTRG. 24477. 7  | coding    | 0. 182      | 828  | 2937 | 4183  |
| MSTRG. 24477. 9  | coding    | 0. 161      | 828  | 2604 | 4079  |
| MSTRG. 24478. 1  | coding    | 0. 375      | 0    | 2181 | 3018  |
| MSTRG. 24495. 3  | coding    | 0. 47       | 648  | 2781 | 2987  |
| MSTRG. 24510. 1  | coding    | 0. 541      | 294  | 4575 | 4751  |
| MSTRG. 24503. 1  | noncoding | -0. 0380928 | 687  | 1023 | 1178  |
| MSTRG. 24504. 1  | coding    | 0. 547      | 0    | 225  | 382   |
| MSTRG. 24514. 2  | coding    | 0. 484      | 528  | 933  | 1344  |
| MSTRG. 24516. 2  | noncoding | -0. 036864  | 90   | 255  | 410   |
| MSTRG. 24521. 6  | noncoding | -0. 0282624 | 2262 | 2679 | 3679  |
| MSTRG. 24523. 3  | coding    | 0. 357      | 0    | 3639 | 3893  |
| MSTRG. 24523. 4  | coding    | 0. 364      | 4704 | 8415 | 8669  |
| MSTRG. 24520. 2  | coding    | 0. 376      | 0    | 750  | 1025  |
| MSTRG. 24520. 3  | coding    | 0. 444      | 0    | 648  | 921   |
| MSTRG. 24520. 4  | coding    | 0. 373      | 1047 | 1662 | 1937  |
| MSTRG. 24520. 6  | coding    | 0. 378      | 288  | 879  | 1153  |
| MSTRG. 24528. 4  | coding    | 0. 258      | 444  | 1074 | 1447  |
| MSTRG. 24528. 3  | coding    | 0. 268      | 177  | 843  | 1215  |
| MSTRG. 24528. 2  | coding    | 0. 262      | 1809 | 2469 | 2841  |
| MSTRG. 24528. 5  | coding    | 0. 276      | 192  | 912  | 1285  |
| MSTRG. 24528. 6  | noncoding | -0. 1314816 | 0    | 270  | 952   |
| MSTRG. 24531. 2  | coding    | 0. 413      | 0    | 426  | 4620  |
| MSTRG. 24539. 3  | coding    | 0. 417      | 318  | 1245 | 1604  |
| MSTRG. 24539. 4  | coding    | 0. 419      | 6375 | 7335 | 7691  |
| MSTRG. 24541. 2  | coding    | 0. 483      | 153  | 720  | 1054  |
| MSTRG. 24543. 1  | noncoding | -0. 016384  | 996  | 1074 | 1560  |
| MSTRG. 24548. 1  | coding    | 0. 072      | 3630 | 3855 | 10378 |
| MSTRG. 24548. 3  | coding    | 0. 064      | 2391 | 2613 | 5713  |
| MSTRG. 24554. 1  | coding    | 0. 171      | 0    | 3972 | 5364  |
| MSTRG. 24554. 4  | coding    | 0. 778      | 0    | 321  | 4907  |
| MSTRG. 24554. 7  | coding    | 0. 148      | 390  | 1968 | 4584  |
| MSTRG. 24554. 9  | coding    | 0. 135      | 309  | 2394 | 4115  |
| MSTRG. 24555. 1  | noncoding | -0. 0004096 | 0    | 0    | 1097  |
| MSTRG. 24553. 1  | coding    | 0. 466      | 0    | 1848 | 3318  |

|                  |           |             |      |      |       |
|------------------|-----------|-------------|------|------|-------|
| MSTRG. 24557. 1  | coding    | 0. 093      | 492  | 1593 | 3393  |
| MSTRG. 24557. 3  | noncoding | -0. 0700416 | 1707 | 2016 | 4314  |
| MSTRG. 24557. 4  | coding    | 0. 078      | 12   | 1254 | 2025  |
| MSTRG. 24557. 5  | coding    | 0. 096      | 12   | 1359 | 1586  |
| MSTRG. 24566. 2  | coding    | 0. 304      | 0    | 2805 | 2958  |
| MSTRG. 24566. 3  | coding    | 0. 264      | 51   | 3102 | 3258  |
| MSTRG. 24568. 2  | coding    | 0. 441      | 537  | 1167 | 2906  |
| MSTRG. 24571. 1  | coding    | 0. 478      | 0    | 2547 | 3908  |
| MSTRG. 24574. 4  | noncoding | -0. 0253952 | 450  | 618  | 915   |
| MSTRG. 24574. 5  | noncoding | -0. 090112  | 15   | 228  | 525   |
| MSTRG. 24574. 3  | noncoding | -0. 0700416 | 0    | 171  | 469   |
| MSTRG. 24574. 2  | noncoding | -0. 0253952 | 0    | 147  | 446   |
| MSTRG. 24574. 6  | noncoding | -0. 002048  | 549  | 651  | 944   |
| MSTRG. 24575. 1  | coding    | 0. 339      | 27   | 630  | 821   |
| MSTRG. 24580. 2  | noncoding | -0. 1060864 | 57   | 432  | 1528  |
| MSTRG. 24584. 2  | coding    | 0. 191      | 0    | 1719 | 2921  |
| MSTRG. 24584. 3  | coding    | 0. 144      | 405  | 1659 | 3022  |
| MSTRG. 24585. 2  | noncoding | -0. 1097728 | 0    | 504  | 658   |
| MSTRG. 24586. 1  | coding    | 0. 246      | 0    | 852  | 1154  |
| MSTRG. 24588. 3  | coding    | 0. 445      | 207  | 1035 | 1192  |
| MSTRG. 24589. 5  | coding    | 0. 224      | 87   | 1338 | 3608  |
| MSTRG. 24589. 6  | coding    | 0. 228      | 87   | 1350 | 3688  |
| MSTRG. 24589. 4  | coding    | 0. 228      | 87   | 1350 | 4507  |
| MSTRG. 24589. 7  | coding    | 0. 248      | 87   | 1257 | 9977  |
| MSTRG. 24591. 10 | coding    | 0. 537      | 348  | 1143 | 1434  |
| MSTRG. 24591. 3  | coding    | 0. 368      | 216  | 1518 | 1673  |
| MSTRG. 24591. 4  | coding    | 0. 439      | 321  | 1362 | 2017  |
| MSTRG. 24591. 5  | coding    | 0. 439      | 348  | 1371 | 2027  |
| MSTRG. 24591. 6  | coding    | 0. 439      | 207  | 1248 | 1905  |
| MSTRG. 24591. 7  | coding    | 0. 439      | 459  | 1482 | 2139  |
| MSTRG. 24591. 8  | coding    | 0. 429      | 216  | 1263 | 1555  |
| MSTRG. 24591. 9  | coding    | 0. 534      | 321  | 1134 | 1424  |
| MSTRG. 24594. 1  | noncoding | -0. 0434176 | 372  | 678  | 3895  |
| MSTRG. 24594. 2  | noncoding | -0. 0434176 | 372  | 678  | 2048  |
| MSTRG. 24595. 3  | coding    | 0. 271      | 129  | 1713 | 3162  |
| MSTRG. 24595. 4  | coding    | 0. 291      | 891  | 2043 | 2199  |
| MSTRG. 24597. 2  | coding    | 0. 418      | 285  | 2217 | 8805  |
| MSTRG. 24599. 3  | coding    | 0. 369      | 0    | 984  | 3409  |
| MSTRG. 24599. 4  | coding    | 0. 299      | 0    | 1371 | 2336  |
| MSTRG. 24599. 5  | coding    | 0. 356      | 0    | 1080 | 3159  |
| MSTRG. 24604. 2  | noncoding | -0. 0274432 | 156  | 441  | 4105  |
| MSTRG. 24604. 1  | coding    | 0. 208      | 7287 | 9261 | 10714 |
| MSTRG. 24604. 3  | coding    | 0. 222      | 7287 | 9774 | 11271 |
| MSTRG. 24602. 1  | noncoding | -0. 06144   | 237  | 327  | 622   |
| MSTRG. 24609. 7  | coding    | 0. 429      | 768  | 2982 | 4262  |
| MSTRG. 24619. 1  | noncoding | -0. 0688128 | 195  | 219  | 584   |
| MSTRG. 24620. 2  | coding    | 0. 108      | 87   | 2508 | 3870  |
| MSTRG. 24620. 3  | coding    | 0. 113      | 354  | 2637 | 3908  |
| MSTRG. 24620. 4  | coding    | 0. 113      | 501  | 2784 | 3998  |
| MSTRG. 24620. 5  | coding    | 0. 116      | 168  | 2181 | 2444  |
| MSTRG. 24621. 1  | coding    | 0. 264      | 0    | 708  | 1243  |
| MSTRG. 24623. 3  | coding    | 0. 502      | 1755 | 3915 | 5450  |
| MSTRG. 24625. 4  | coding    | 0. 396      | 12   | 1224 | 4400  |
| MSTRG. 24625. 5  | coding    | 0. 396      | 6    | 1218 | 4459  |

|                 |           |             |      |      |      |
|-----------------|-----------|-------------|------|------|------|
| MSTRG. 24629. 1 | coding    | 0. 456      | 0    | 1353 | 4852 |
| MSTRG. 24629. 3 | coding    | 0. 456      | 0    | 1353 | 4705 |
| MSTRG. 24630. 1 | coding    | 0. 255      | 885  | 2115 | 3890 |
| MSTRG. 24633. 1 | coding    | 0. 462      | 0    | 192  | 498  |
| MSTRG. 24637. 1 | coding    | 0. 487      | 6    | 900  | 3862 |
| MSTRG. 24637. 3 | coding    | 0. 493      | 177  | 819  | 3779 |
| MSTRG. 24637. 2 | coding    | 0. 5        | 198  | 897  | 3859 |
| MSTRG. 24637. 4 | coding    | 0. 497      | 153  | 807  | 3769 |
| MSTRG. 24640. 2 | coding    | 0. 367      | 486  | 1068 | 1258 |
| MSTRG. 24648. 1 | noncoding | -0. 049152  | 2721 | 2832 | 4587 |
| MSTRG. 24649. 1 | noncoding | -0. 0004096 | 0    | 0    | 1468 |
| MSTRG. 24651. 1 | coding    | 0. 044      | 345  | 1719 | 2821 |
| MSTRG. 24651. 2 | coding    | 0. 061      | 345  | 1791 | 2721 |
| MSTRG. 24642. 6 | coding    | 0. 153      | 0    | 4398 | 8815 |
| MSTRG. 24642. 7 | coding    | 0. 153      | 0    | 3651 | 8397 |
| MSTRG. 24644. 1 | coding    | 0. 438      | 75   | 1497 | 4388 |
| MSTRG. 24656. 3 | coding    | 0. 221      | 603  | 1989 | 7706 |
| MSTRG. 24659. 3 | coding    | 0. 433      | 0    | 528  | 1156 |
| MSTRG. 24659. 4 | coding    | 0. 346      | 216  | 780  | 1296 |
| MSTRG. 24662. 2 | coding    | 0. 443      | 294  | 3273 | 3752 |
| MSTRG. 24663. 2 | coding    | 0. 457      | 1104 | 2379 | 5656 |
| MSTRG. 24664. 2 | coding    | 0. 395      | 66   | 2118 | 2426 |
| MSTRG. 24666. 3 | coding    | 0. 076      | 51   | 609  | 1845 |
| MSTRG. 24661. 3 | coding    | 0. 247      | 0    | 2001 | 3891 |
| MSTRG. 24661. 4 | coding    | 0. 247      | 0    | 2001 | 3907 |
| MSTRG. 24670. 1 | noncoding | -0. 0376832 | 306  | 636  | 862  |
| MSTRG. 24669. 3 | coding    | 0. 463      | 45   | 1338 | 2810 |
| MSTRG. 24669. 6 | coding    | 0. 293      | 42   | 417  | 968  |
| MSTRG. 24673. 2 | coding    | 0. 107      | 135  | 4881 | 5594 |
| MSTRG. 24672. 1 | noncoding | -0. 0270336 | 345  | 903  | 1086 |
| MSTRG. 24676. 1 | noncoding | -0. 024576  | 330  | 462  | 617  |
| MSTRG. 24676. 2 | noncoding | -0. 032768  | 354  | 483  | 637  |
| MSTRG. 24677. 1 | noncoding | -0. 032768  | 267  | 336  | 980  |
| MSTRG. 24693. 3 | coding    | 0. 312      | 177  | 1332 | 1713 |
| MSTRG. 24696. 1 | coding    | 0. 291      | 0    | 510  | 2203 |
| MSTRG. 24696. 2 | noncoding | -0. 1196032 | 0    | 414  | 2161 |
| MSTRG. 24697. 2 | coding    | 0. 439      | 162  | 3432 | 4468 |
| MSTRG. 24697. 5 | coding    | 0. 454      | 252  | 3441 | 3955 |
| MSTRG. 24724. 1 | coding    | 0. 691      | 0    | 1275 | 3738 |
| MSTRG. 24724. 6 | coding    | 0. 696      | 0    | 1266 | 3109 |
| MSTRG. 24724. 5 | coding    | 0. 694      | 0    | 1272 | 3111 |
| MSTRG. 24724. 7 | coding    | 0. 691      | 0    | 1275 | 3182 |
| MSTRG. 24724. 2 | coding    | 0. 691      | 0    | 1275 | 3124 |
| MSTRG. 24724. 3 | coding    | 0. 691      | 0    | 1275 | 3130 |
| MSTRG. 24724. 4 | coding    | 0. 691      | 0    | 1275 | 2535 |
| MSTRG. 24725. 1 | coding    | 0. 227      | 0    | 2820 | 8191 |
| MSTRG. 24725. 2 | coding    | 0. 254      | 750  | 3186 | 7518 |
| MSTRG. 24725. 3 | coding    | 0. 248      | 750  | 3078 | 8208 |
| MSTRG. 24725. 4 | coding    | 0. 401      | 5037 | 6795 | 7078 |
| MSTRG. 24725. 5 | coding    | 0. 254      | 126  | 2562 | 7635 |
| MSTRG. 24729. 1 | coding    | 0. 37       | 87   | 2052 | 2207 |
| MSTRG. 24729. 2 | coding    | 0. 365      | 336  | 2358 | 2513 |
| MSTRG. 24729. 3 | coding    | 0. 3        | 1170 | 2199 | 2356 |
| MSTRG. 24729. 4 | coding    | 0. 346      | 114  | 2220 | 2375 |

|                 |           |             |      |      |      |
|-----------------|-----------|-------------|------|------|------|
| MSTRG. 24729. 5 | coding    | 0. 3        | 1146 | 2175 | 2330 |
| MSTRG. 24729. 6 | coding    | 0. 365      | 285  | 2307 | 2462 |
| MSTRG. 24732. 1 | coding    | 0. 401      | 3045 | 3957 | 4646 |
| MSTRG. 24732. 2 | coding    | 0. 401      | 3036 | 3948 | 4639 |
| MSTRG. 24732. 4 | coding    | 0. 234      | 666  | 1680 | 3510 |
| MSTRG. 24735. 4 | coding    | 0. 369      | 0    | 2427 | 2922 |
| MSTRG. 24710. 4 | coding    | 0. 305      | 753  | 2979 | 5220 |
| MSTRG. 24710. 5 | coding    | 0. 305      | 342  | 2568 | 4761 |
| MSTRG. 24706. 1 | coding    | 0. 233      | 0    | 582  | 870  |
| MSTRG. 24711. 3 | coding    | 0. 328      | 0    | 3495 | 3937 |
| MSTRG. 24711. 4 | coding    | 0. 346      | 0    | 2943 | 3389 |
| MSTRG. 24717. 2 | coding    | 0. 177      | 48   | 462  | 1139 |
| MSTRG. 24721. 1 | coding    | 0. 273      | 4458 | 6324 | 7328 |
| MSTRG. 24721. 2 | coding    | 0. 23       | 243  | 1029 | 3548 |
| MSTRG. 24721. 4 | coding    | 0. 23       | 357  | 1143 | 2586 |
| MSTRG. 24722. 2 | coding    | 0. 327      | 0    | 1833 | 1987 |
| MSTRG. 24722. 4 | coding    | 0. 343      | 0    | 2403 | 2702 |
| MSTRG. 24714. 2 | coding    | 0. 281      | 381  | 855  | 1008 |
| MSTRG. 24715. 2 | coding    | 0. 449      | 0    | 1752 | 3915 |
| MSTRG. 24741. 2 | coding    | 0. 4        | 165  | 996  | 2503 |
| MSTRG. 24742. 3 | coding    | 0. 276      | 189  | 591  | 3568 |
| MSTRG. 24743. 2 | coding    | 0. 044      | 132  | 5187 | 5864 |
| MSTRG. 24743. 3 | coding    | 0. 044      | 132  | 5184 | 5861 |
| MSTRG. 24745. 1 | noncoding | -0. 0110592 | 63   | 240  | 1012 |
| MSTRG. 24745. 2 | noncoding | -0. 0110592 | 63   | 240  | 993  |
| MSTRG. 24745. 3 | noncoding | -0. 0135168 | 525  | 693  | 848  |
| MSTRG. 24748. 1 | coding    | 0. 418      | 582  | 1152 | 1734 |
| MSTRG. 24763. 1 | coding    | 0. 272      | 0    | 642  | 8495 |
| MSTRG. 24763. 3 | coding    | 0. 312      | 0    | 528  | 1175 |
| MSTRG. 24768. 3 | coding    | 0. 49       | 150  | 3399 | 3575 |
| MSTRG. 24768. 7 | coding    | 0. 49       | 150  | 3396 | 3572 |
| MSTRG. 24769. 1 | noncoding | -0. 0323584 | 48   | 294  | 838  |
| MSTRG. 24772. 2 | coding    | 0. 316      | 540  | 1572 | 4165 |
| MSTRG. 24774. 5 | coding    | 0. 501      | 0    | 2325 | 3029 |
| MSTRG. 24774. 6 | coding    | 0. 517      | 126  | 2259 | 2961 |
| MSTRG. 24784. 2 | coding    | 0. 412      | 1965 | 3702 | 6499 |
| MSTRG. 24784. 3 | coding    | 0. 496      | 18   | 513  | 1759 |
| MSTRG. 24785. 3 | coding    | 0. 318      | 630  | 1698 | 2167 |
| MSTRG. 24788. 1 | noncoding | -0. 049152  | 3699 | 4149 | 4465 |
| MSTRG. 24789. 1 | noncoding | -0. 012288  | 885  | 924  | 1458 |
| MSTRG. 24792. 2 | coding    | 0. 178      | 429  | 2616 | 3819 |
| MSTRG. 24793. 1 | noncoding | -0. 008192  | 3    | 129  | 284  |
| MSTRG. 24793. 2 | noncoding | -0. 016384  | 0    | 147  | 314  |
| MSTRG. 24778. 1 | coding    | 0. 295      | 255  | 1341 | 1943 |
| MSTRG. 24782. 1 | coding    | 0. 437      | 0    | 3147 | 3551 |
| MSTRG. 24795. 2 | coding    | 0. 531      | 672  | 1407 | 2483 |
| MSTRG. 24801. 1 | coding    | 0. 318      | 0    | 1035 | 1316 |
| MSTRG. 24801. 2 | coding    | 0. 383      | 111  | 951  | 1232 |
| MSTRG. 24805. 2 | coding    | 0. 27       | 48   | 1125 | 1400 |
| MSTRG. 24807. 1 | noncoding | -0. 073728  | 0    | 63   | 462  |
| MSTRG. 24809. 1 | coding    | 0. 505      | 153  | 2913 | 4476 |
| MSTRG. 24810. 1 | noncoding | -0. 0958464 | 0    | 423  | 597  |
| MSTRG. 24814. 1 | coding    | 0. 134      | 0    | 7662 | 8097 |
| MSTRG. 24815. 2 | coding    | 0. 144      | 0    | 696  | 1138 |



|                  |           |             |      |      |       |
|------------------|-----------|-------------|------|------|-------|
| MSTRG. 24816. 1  | coding    | 0. 274      | 297  | 696  | 1141  |
| MSTRG. 24816. 2  | coding    | 0. 286      | 69   | 408  | 879   |
| MSTRG. 24817. 1  | coding    | 0. 44       | 114  | 996  | 1151  |
| MSTRG. 24817. 2  | coding    | 0. 326      | 450  | 1308 | 3135  |
| MSTRG. 24820. 2  | coding    | 0. 252      | 81   | 1743 | 3456  |
| MSTRG. 24821. 1  | noncoding | -0. 0475136 | 0    | 9    | 450   |
| MSTRG. 24825. 1  | noncoding | -0. 016384  | 1050 | 1173 | 1326  |
| MSTRG. 24826. 4  | coding    | 0. 383      | 189  | 1191 | 1526  |
| MSTRG. 24826. 6  | coding    | 0. 382      | 273  | 1293 | 1629  |
| MSTRG. 24826. 2  | coding    | 0. 383      | 300  | 1407 | 1744  |
| MSTRG. 24826. 3  | coding    | 0. 384      | 189  | 1278 | 1614  |
| MSTRG. 24826. 5  | coding    | 0. 383      | 273  | 1380 | 1717  |
| MSTRG. 24826. 7  | coding    | 0. 382      | 300  | 1320 | 1657  |
| MSTRG. 24826. 8  | coding    | 0. 365      | 1803 | 2712 | 3047  |
| MSTRG. 24827. 6  | coding    | 0. 185      | 384  | 3435 | 4644  |
| MSTRG. 24827. 7  | coding    | 0. 26       | 339  | 1809 | 3014  |
| MSTRG. 24827. 8  | coding    | 0. 258      | 414  | 2073 | 3259  |
| MSTRG. 24827. 9  | coding    | 0. 26       | 366  | 1836 | 3023  |
| MSTRG. 24827. 10 | coding    | 0. 237      | 306  | 2157 | 3282  |
| MSTRG. 24827. 11 | coding    | 0. 301      | 3558 | 4746 | 5862  |
| MSTRG. 24828. 1  | noncoding | -0. 0495616 | 2715 | 3093 | 5181  |
| MSTRG. 24830. 1  | noncoding | -0. 0524288 | 411  | 489  | 800   |
| MSTRG. 24833. 1  | noncoding | -0. 016384  | 999  | 1131 | 1370  |
| MSTRG. 24835. 1  | coding    | 0. 369      | 108  | 2145 | 5471  |
| MSTRG. 24836. 1  | noncoding | -0. 1544192 | 0    | 99   | 524   |
| MSTRG. 24837. 1  | coding    | 0. 089      | 546  | 2490 | 2644  |
| MSTRG. 24837. 2  | noncoding | -0. 024576  | 171  | 261  | 1256  |
| MSTRG. 24837. 3  | coding    | 0. 097      | 705  | 4647 | 4802  |
| MSTRG. 24837. 4  | coding    | 0. 084      | 702  | 4248 | 4635  |
| MSTRG. 24837. 5  | coding    | 0. 079      | 69   | 2031 | 2188  |
| MSTRG. 24841. 2  | coding    | 0. 136      | 0    | 5319 | 5572  |
| MSTRG. 24841. 1  | coding    | 0. 134      | 0    | 5373 | 5644  |
| MSTRG. 24834. 3  | coding    | 0. 108      | 213  | 1080 | 1802  |
| MSTRG. 24844. 1  | coding    | 0. 119      | 372  | 2412 | 3702  |
| MSTRG. 24844. 2  | coding    | 0. 106      | 372  | 2505 | 3795  |
| MSTRG. 24844. 3  | coding    | 0. 116      | 0    | 2154 | 3444  |
| MSTRG. 24844. 8  | coding    | 0. 127      | 0    | 2268 | 3558  |
| MSTRG. 24844. 9  | coding    | 0. 113      | 0    | 2361 | 3651  |
| MSTRG. 24844. 10 | coding    | 0. 101      | 150  | 2040 | 2832  |
| MSTRG. 24846. 1  | noncoding | -0. 0147456 | 1836 | 2004 | 2165  |
| MSTRG. 24847. 1  | noncoding | -0. 036864  | 417  | 450  | 606   |
| MSTRG. 24842. 4  | coding    | 0. 149      | 0    | 627  | 932   |
| MSTRG. 24850. 1  | noncoding | -0. 0299008 | 7101 | 7242 | 7635  |
| MSTRG. 24849. 3  | coding    | 0. 149      | 0    | 159  | 1613  |
| MSTRG. 24849. 2  | coding    | 0. 288      | 0    | 5961 | 11913 |
| MSTRG. 24852. 1  | noncoding | -0. 024576  | 1503 | 1566 | 2157  |
| MSTRG. 24853. 1  | noncoding | -0. 0565248 | 759  | 786  | 2406  |
| MSTRG. 24854. 1  | noncoding | -0. 0098304 | 5826 | 5925 | 6835  |
| MSTRG. 24855. 1  | noncoding | -0. 073728  | 1188 | 1278 | 7315  |
| MSTRG. 24856. 1  | noncoding | -0. 032768  | 153  | 231  | 546   |
| MSTRG. 24858. 2  | coding    | 0. 509      | 429  | 1245 | 3011  |
| MSTRG. 24858. 3  | coding    | 0. 509      | 231  | 1047 | 2814  |
| MSTRG. 24858. 4  | noncoding | -0. 006144  | 702  | 888  | 1041  |
| MSTRG. 24860. 3  | coding    | 0. 487      | 3    | 2298 | 2452  |

|                  |           |             |       |       |       |
|------------------|-----------|-------------|-------|-------|-------|
| MSTRG. 24861. 2  | coding    | 0. 456      | 0     | 2130  | 2898  |
| MSTRG. 24861. 3  | coding    | 0. 456      | 0     | 2130  | 2801  |
| MSTRG. 24861. 4  | coding    | 0. 456      | 0     | 2130  | 2870  |
| MSTRG. 24861. 5  | coding    | 0. 456      | 0     | 2130  | 2456  |
| MSTRG. 24862. 1  | coding    | 0. 42       | 948   | 2334  | 2503  |
| MSTRG. 24866. 1  | coding    | 0. 35       | 9     | 2184  | 4554  |
| MSTRG. 24866. 2  | coding    | 0. 341      | 9     | 2277  | 4647  |
| MSTRG. 24866. 3  | coding    | 0. 347      | 333   | 2436  | 4795  |
| MSTRG. 24866. 7  | coding    | 0. 373      | 756   | 2223  | 2804  |
| MSTRG. 24867. 2  | coding    | 0. 37       | 0     | 534   | 1336  |
| MSTRG. 24867. 4  | coding    | 0. 321      | 0     | 735   | 1531  |
| MSTRG. 24867. 3  | coding    | 0. 391      | 138   | 1737  | 2531  |
| MSTRG. 24867. 5  | coding    | 0. 385      | 264   | 1932  | 2684  |
| MSTRG. 24867. 11 | coding    | 0. 381      | 288   | 1500  | 2268  |
| MSTRG. 24867. 7  | coding    | 0. 392      | 141   | 1287  | 2053  |
| MSTRG. 24867. 8  | coding    | 0. 381      | 732   | 1944  | 2711  |
| MSTRG. 24878. 1  | coding    | 0. 382      | 147   | 1434  | 1599  |
| MSTRG. 24879. 2  | coding    | 0. 43       | 153   | 1503  | 2451  |
| MSTRG. 24864. 1  | coding    | 0. 639      | 366   | 4206  | 5744  |
| MSTRG. 24865. 1  | noncoding | -0. 0372736 | 345   | 531   | 1096  |
| MSTRG. 24865. 2  | noncoding | -0. 0667648 | 330   | 585   | 1003  |
| MSTRG. 24869. 2  | noncoding | -0. 0864256 | 3     | 204   | 594   |
| MSTRG. 24869. 4  | noncoding | -0. 0630784 | 3     | 168   | 719   |
| MSTRG. 24869. 3  | noncoding | -0. 0475136 | 243   | 510   | 663   |
| MSTRG. 24871. 2  | coding    | 0. 525      | 258   | 3066  | 7757  |
| MSTRG. 24890. 1  | noncoding | -0. 0663552 | 63    | 396   | 1576  |
| MSTRG. 24892. 1  | coding    | 0. 144      | 2241  | 2961  | 3231  |
| MSTRG. 24892. 3  | coding    | 0. 08       | 0     | 411   | 1823  |
| MSTRG. 24892. 4  | noncoding | -0. 032768  | 498   | 591   | 1986  |
| MSTRG. 24892. 5  | coding    | 0. 152      | 1983  | 2418  | 2653  |
| MSTRG. 24892. 6  | coding    | 0. 078      | 435   | 1431  | 1699  |
| MSTRG. 24893. 3  | coding    | 0. 092      | 390   | 2490  | 4483  |
| MSTRG. 24885. 7  | coding    | 0. 145      | 54    | 5883  | 8941  |
| MSTRG. 24885. 6  | coding    | 0. 126      | 657   | 7347  | 11242 |
| MSTRG. 24885. 5  | coding    | 0. 189      | 93    | 8838  | 12732 |
| MSTRG. 24885. 3  | coding    | 0. 189      | 99    | 9018  | 12911 |
| MSTRG. 24885. 10 | coding    | 0. 165      | 1089  | 4464  | 4715  |
| MSTRG. 24885. 11 | coding    | 0. 145      | 27    | 5478  | 5731  |
| MSTRG. 24885. 8  | coding    | 0. 143      | 531   | 6330  | 6583  |
| MSTRG. 24885. 9  | coding    | 0. 192      | 0     | 8367  | 8618  |
| MSTRG. 24898. 1  | coding    | 0. 219      | 486   | 1584  | 2126  |
| MSTRG. 24898. 2  | coding    | 0. 179      | 3474  | 4260  | 8877  |
| MSTRG. 24898. 3  | coding    | 0. 226      | 486   | 1443  | 8633  |
| MSTRG. 24898. 4  | coding    | 0. 215      | 486   | 1425  | 4923  |
| MSTRG. 24898. 5  | coding    | 0. 183      | 19071 | 19590 | 21385 |
| MSTRG. 24898. 6  | coding    | 0. 197      | 486   | 1212  | 2587  |
| MSTRG. 24903. 1  | noncoding | -0. 1134592 | 0     | 174   | 546   |
| MSTRG. 24913. 2  | coding    | 0. 433      | 66    | 2118  | 2408  |
| MSTRG. 24914. 2  | noncoding | -0. 0442368 | 618   | 1347  | 2124  |
| MSTRG. 24911. 4  | coding    | 0. 241      | 225   | 726   | 1027  |
| MSTRG. 24920. 1  | noncoding | -0. 0233472 | 1572  | 2199  | 2961  |
| MSTRG. 24922. 1  | noncoding | -0. 024576  | 138   | 354   | 1031  |
| MSTRG. 24924. 2  | coding    | 0. 396      | 375   | 1446  | 2969  |
| MSTRG. 24925. 1  | coding    | 0. 219      | 0     | 1248  | 2589  |

|                  |           |             |      |       |       |
|------------------|-----------|-------------|------|-------|-------|
| MSTRG. 24925. 2  | coding    | 0. 265      | 0    | 963   | 2304  |
| MSTRG. 24930. 1  | noncoding | -0. 0155648 | 231  | 318   | 707   |
| MSTRG. 24932. 1  | noncoding | -0. 0356352 | 66   | 237   | 498   |
| MSTRG. 24936. 1  | coding    | 0. 312      | 18   | 1494  | 2774  |
| MSTRG. 24936. 5  | coding    | 0. 312      | 15   | 1494  | 3619  |
| MSTRG. 24936. 4  | coding    | 0. 282      | 15   | 1773  | 2987  |
| MSTRG. 24936. 7  | coding    | 0. 349      | 5244 | 6408  | 7426  |
| MSTRG. 24958. 2  | coding    | 0. 393      | 342  | 1788  | 2108  |
| MSTRG. 24958. 1  | coding    | 0. 393      | 93   | 1542  | 1909  |
| MSTRG. 24959. 1  | coding    | 0. 474      | 0    | 1878  | 2064  |
| MSTRG. 24959. 2  | coding    | 0. 475      | 0    | 1881  | 2065  |
| MSTRG. 24960. 1  | coding    | 0. 372      | 0    | 1215  | 2421  |
| MSTRG. 24960. 2  | coding    | 0. 401      | 0    | 801   | 1305  |
| MSTRG. 24960. 4  | coding    | 0. 457      | 0    | 801   | 1904  |
| MSTRG. 24960. 5  | coding    | 0. 387      | 0    | 1077  | 1709  |
| MSTRG. 24961. 1  | noncoding | -0. 2138112 | 153  | 207   | 363   |
| MSTRG. 24962. 2  | coding    | 0. 337      | 342  | 2628  | 3172  |
| MSTRG. 24963. 1  | noncoding | -0. 1253376 | 96   | 417   | 943   |
| MSTRG. 24969. 4  | noncoding | -0. 0507904 | 75   | 435   | 590   |
| MSTRG. 24971. 1  | noncoding | -0. 0761856 | 654  | 1131  | 1390  |
| MSTRG. 24971. 2  | noncoding | -0. 0761856 | 846  | 1323  | 1583  |
| MSTRG. 24971. 3  | noncoding | -0. 0761856 | 825  | 1302  | 1584  |
| MSTRG. 24971. 4  | noncoding | -0. 0761856 | 1575 | 2052  | 2375  |
| MSTRG. 24960. 6  | coding    | 0. 556      | 0    | 1422  | 2295  |
| MSTRG. 24960. 7  | coding    | 0. 532      | 801  | 2217  | 3091  |
| MSTRG. 24944. 2  | coding    | 0. 341      | 288  | 1350  | 2368  |
| MSTRG. 24946. 4  | coding    | 0. 512      | 294  | 2334  | 2998  |
| MSTRG. 24946. 3  | coding    | 0. 483      | 0    | 2544  | 3208  |
| MSTRG. 24946. 5  | coding    | 0. 504      | 225  | 2181  | 2844  |
| MSTRG. 24948. 2  | coding    | 0. 253      | 0    | 510   | 5015  |
| MSTRG. 24954. 3  | coding    | 0. 4        | 129  | 3612  | 4497  |
| MSTRG. 24954. 6  | coding    | 0. 422      | 0    | 3090  | 4071  |
| MSTRG. 24976. 3  | coding    | 0. 541      | 198  | 753   | 1727  |
| MSTRG. 24976. 2  | coding    | 0. 347      | 678  | 3402  | 6384  |
| MSTRG. 24976. 4  | coding    | 0. 482      | 225  | 996   | 4344  |
| MSTRG. 25009. 1  | coding    | 0. 349      | 0    | 585   | 1824  |
| MSTRG. 25010. 1  | coding    | 0. 308      | 0    | 1941  | 4267  |
| MSTRG. 25010. 8  | coding    | 0. 261      | 9114 | 24165 | 26122 |
| MSTRG. 25010. 10 | coding    | 0. 271      | 3852 | 13848 | 15805 |
| MSTRG. 25010. 11 | coding    | 0. 276      | 2964 | 13032 | 14989 |
| MSTRG. 25010. 12 | coding    | 0. 269      | 2445 | 15603 | 17561 |
| MSTRG. 25010. 13 | coding    | 0. 27       | 7482 | 17499 | 19457 |
| MSTRG. 25010. 6  | coding    | 0. 302      | 1836 | 3753  | 5698  |
| MSTRG. 25010. 4  | coding    | 0. 279      | 0    | 3114  | 5072  |
| MSTRG. 25010. 7  | coding    | 0. 259      | 0    | 4611  | 6570  |
| MSTRG. 25010. 3  | coding    | 0. 281      | 0    | 8061  | 10018 |
| MSTRG. 25010. 5  | coding    | 0. 287      | 0    | 11127 | 13084 |
| MSTRG. 25012. 1  | noncoding | -0. 0548864 | 138  | 216   | 626   |
| MSTRG. 25010. 15 | coding    | 0. 295      | 0    | 2874  | 3029  |
| MSTRG. 25010. 16 | coding    | 0. 262      | 2436 | 5838  | 5993  |
| MSTRG. 24992. 2  | coding    | 0. 442      | 294  | 3051  | 3891  |
| MSTRG. 24993. 1  | coding    | 0. 483      | 0    | 3597  | 4227  |
| MSTRG. 24993. 3  | coding    | 0. 461      | 0    | 3609  | 4218  |
| MSTRG. 24993. 4  | coding    | 0. 477      | 0    | 3600  | 4209  |

|                 |           |             |       |       |       |
|-----------------|-----------|-------------|-------|-------|-------|
| MSTRG. 24993. 5 | coding    | 0. 455      | 0     | 3672  | 4260  |
| MSTRG. 24986. 1 | coding    | 0. 376      | 33    | 1500  | 4634  |
| MSTRG. 24996. 1 | noncoding | -0. 0421888 | 2166  | 2391  | 5368  |
| MSTRG. 25001. 2 | coding    | 0. 568      | 0     | 1290  | 4738  |
| MSTRG. 25001. 4 | coding    | 0. 497      | 147   | 1578  | 3523  |
| MSTRG. 25003. 2 | coding    | 0. 382      | 0     | 516   | 3322  |
| MSTRG. 25006. 1 | coding    | 0. 402      | 0     | 1263  | 3092  |
| MSTRG. 25006. 3 | noncoding | -0. 1675264 | 0     | 120   | 1470  |
| MSTRG. 25020. 1 | coding    | 0. 477      | 432   | 3039  | 6881  |
| MSTRG. 25020. 4 | coding    | 0. 477      | 90    | 2697  | 6540  |
| MSTRG. 25020. 5 | coding    | 0. 377      | 45    | 570   | 805   |
| MSTRG. 25021. 1 | coding    | 0. 259      | 0     | 5748  | 8322  |
| MSTRG. 25021. 2 | coding    | 0. 259      | 0     | 5847  | 8421  |
| MSTRG. 25021. 3 | coding    | 0. 262      | 0     | 5631  | 8140  |
| MSTRG. 25027. 4 | coding    | 0. 596      | 10377 | 11514 | 13261 |
| MSTRG. 25027. 7 | coding    | 0. 555      | 0     | 1773  | 3509  |
| MSTRG. 25027. 9 | coding    | 0. 562      | 0     | 1860  | 3148  |
| MSTRG. 25027. 8 | coding    | 0. 558      | 0     | 1788  | 3010  |
| MSTRG. 25028. 2 | coding    | 0. 394      | 90    | 2175  | 2643  |
| MSTRG. 25029. 1 | noncoding | -0. 049152  | 192   | 279   | 644   |
| MSTRG. 25031. 2 | noncoding | -0. 0278528 | 219   | 972   | 1261  |
| MSTRG. 25031. 3 | noncoding | -0. 0466944 | 534   | 882   | 1172  |
| MSTRG. 25031. 1 | noncoding | -0. 0425984 | 825   | 1293  | 1581  |
| MSTRG. 25031. 4 | noncoding | -0. 028672  | 324   | 795   | 1080  |
| MSTRG. 25033. 2 | noncoding | -0. 0466944 | 4329  | 5118  | 5271  |
| MSTRG. 25032. 4 | coding    | 0. 576      | 0     | 288   | 1791  |
| MSTRG. 25039. 3 | coding    | 0. 287      | 201   | 1236  | 2050  |
| MSTRG. 25041. 2 | noncoding | -0. 049152  | 1170  | 1236  | 2329  |
| MSTRG. 25038. 1 | noncoding | -0. 069632  | 108   | 192   | 347   |
| MSTRG. 25042. 1 | coding    | 0. 423      | 846   | 1635  | 1789  |
| MSTRG. 25045. 3 | coding    | 0. 495      | 0     | 789   | 17801 |
| MSTRG. 25049. 1 | noncoding | -0. 0843776 | 0     | 291   | 946   |
| MSTRG. 25050. 2 | coding    | 0. 299      | 135   | 4647  | 4803  |
| MSTRG. 25050. 4 | coding    | 0. 29       | 135   | 4593  | 4748  |
| MSTRG. 25050. 5 | coding    | 0. 286      | 135   | 4434  | 4588  |
| MSTRG. 25051. 3 | coding    | 0. 381      | 0     | 516   | 671   |
| MSTRG. 25051. 4 | coding    | 0. 429      | 0     | 549   | 705   |
| MSTRG. 25051. 6 | noncoding | -0. 0733184 | 135   | 372   | 529   |
| MSTRG. 25053. 6 | coding    | 0. 611      | 0     | 2109  | 3789  |
| MSTRG. 25058. 1 | coding    | 0. 276      | 210   | 2427  | 6310  |
| MSTRG. 25058. 3 | coding    | 0. 234      | 270   | 1773  | 5036  |
| MSTRG. 25059. 1 | coding    | 0. 486      | 489   | 3852  | 4919  |
| MSTRG. 25055. 1 | noncoding | -0. 0884736 | 606   | 1011  | 1166  |
| MSTRG. 25056. 1 | coding    | 0. 532      | 0     | 1776  | 2202  |
| MSTRG. 25060. 3 | coding    | 0. 343      | 69    | 690   | 1782  |
| MSTRG. 25063. 2 | noncoding | -0. 1056768 | 918   | 1233  | 3017  |
| MSTRG. 25063. 1 | noncoding | -0. 1056768 | 552   | 867   | 2085  |
| MSTRG. 25064. 2 | coding    | 0. 444      | 513   | 1563  | 1718  |
| MSTRG. 25067. 2 | coding    | 0. 404      | 0     | 264   | 4699  |
| MSTRG. 25067. 3 | coding    | 0. 425      | 0     | 348   | 3767  |
| MSTRG. 25070. 1 | noncoding | -0. 0524288 | 408   | 729   | 1230  |
| MSTRG. 25070. 2 | noncoding | -0. 0524288 | 405   | 726   | 1226  |
| MSTRG. 25070. 4 | noncoding | -0. 0524288 | 378   | 699   | 1103  |
| MSTRG. 25072. 4 | coding    | 0. 375      | 408   | 1431  | 1876  |

|                 |           |             |      |      |       |
|-----------------|-----------|-------------|------|------|-------|
| MSTRG. 25072. 3 | coding    | 0. 445      | 0    | 1482 | 1927  |
| MSTRG. 25074. 2 | coding    | 0. 497      | 1653 | 4716 | 5927  |
| MSTRG. 25074. 3 | coding    | 0. 502      | 1182 | 4215 | 5395  |
| MSTRG. 25071. 3 | coding    | 0. 199      | 0    | 501  | 2311  |
| MSTRG. 25078. 3 | coding    | 0. 319      | 1491 | 4227 | 5819  |
| MSTRG. 25079. 3 | coding    | 0. 304      | 192  | 849  | 1302  |
| MSTRG. 25079. 2 | coding    | 0. 322      | 195  | 885  | 1337  |
| MSTRG. 25078. 4 | coding    | 0. 401      | 657  | 2823 | 4415  |
| MSTRG. 25080. 2 | coding    | 0. 347      | 507  | 2370 | 2569  |
| MSTRG. 25076. 2 | noncoding | -0. 0888832 | 60   | 447  | 1596  |
| MSTRG. 25076. 3 | noncoding | -0. 034816  | 819  | 1026 | 1395  |
| MSTRG. 25085. 2 | coding    | 0. 441      | 0    | 384  | 915   |
| MSTRG. 25085. 3 | coding    | 0. 458      | 0    | 816  | 976   |
| MSTRG. 25081. 1 | coding    | 0. 487      | 15   | 1956 | 4825  |
| MSTRG. 25090. 3 | coding    | 0. 25       | 66   | 447  | 627   |
| MSTRG. 25108. 4 | coding    | 0. 607      | 0    | 627  | 2469  |
| MSTRG. 25108. 7 | coding    | 0. 613      | 0    | 600  | 3781  |
| MSTRG. 25109. 1 | noncoding | -0. 016384  | 111  | 219  | 556   |
| MSTRG. 25110. 1 | coding    | 0. 494      | 309  | 2355 | 3299  |
| MSTRG. 25103. 2 | coding    | 0. 513      | 33   | 1932 | 2692  |
| MSTRG. 25103. 3 | coding    | 0. 517      | 240  | 2088 | 2849  |
| MSTRG. 25103. 5 | coding    | 0. 513      | 234  | 1959 | 2673  |
| MSTRG. 25103. 4 | coding    | 0. 513      | 90   | 1815 | 2530  |
| MSTRG. 25103. 6 | coding    | 0. 547      | 0    | 510  | 1178  |
| MSTRG. 25105. 1 | coding    | 0. 261      | 147  | 435  | 600   |
| MSTRG. 25104. 1 | noncoding | -0. 139264  | 246  | 267  | 420   |
| MSTRG. 25107. 1 | noncoding | -0. 065536  | 6    | 60   | 361   |
| MSTRG. 25116. 1 | coding    | 0. 441      | 0    | 1422 | 2839  |
| MSTRG. 25116. 3 | coding    | 0. 426      | 75   | 1515 | 2932  |
| MSTRG. 25115. 1 | noncoding | -0. 0049152 | 141  | 252  | 531   |
| MSTRG. 25118. 2 | noncoding | -0. 0671744 | 576  | 1389 | 3063  |
| MSTRG. 25120. 1 | coding    | 0. 41       | 75   | 1092 | 1300  |
| MSTRG. 25123. 1 | noncoding | -0. 008192  | 564  | 699  | 1882  |
| MSTRG. 25124. 1 | coding    | 0. 551      | 0    | 1311 | 3395  |
| MSTRG. 25124. 2 | coding    | 0. 633      | 0    | 1122 | 3212  |
| MSTRG. 25125. 1 | noncoding | -0. 0581632 | 180  | 543  | 710   |
| MSTRG. 25143. 1 | noncoding | -0. 1097728 | 5013 | 5343 | 12557 |
| MSTRG. 25143. 2 | noncoding | -0. 075776  | 1674 | 1944 | 8309  |
| MSTRG. 25143. 3 | noncoding | -0. 1097728 | 5079 | 5409 | 11757 |
| MSTRG. 25128. 1 | noncoding | -0. 0131072 | 684  | 882  | 1347  |
| MSTRG. 25138. 1 | noncoding | -0. 2048    | 0    | 117  | 335   |
| MSTRG. 25139. 1 | noncoding | -0. 028672  | 123  | 171  | 355   |
| MSTRG. 25150. 4 | coding    | 0. 392      | 585  | 1548 | 1968  |
| MSTRG. 25166. 1 | noncoding | -0. 012288  | 681  | 885  | 1073  |
| MSTRG. 25167. 1 | coding    | 0. 146      | 678  | 5271 | 5831  |
| MSTRG. 25167. 3 | coding    | 0. 188      | 2094 | 3831 | 4062  |
| MSTRG. 25168. 1 | coding    | 0. 259      | 3042 | 4896 | 12953 |
| MSTRG. 25164. 2 | coding    | 0. 319      | 276  | 972  | 1353  |
| MSTRG. 25164. 1 | coding    | 0. 311      | 276  | 1047 | 1616  |
| MSTRG. 25164. 4 | coding    | 0. 319      | 0    | 678  | 962   |
| MSTRG. 25170. 1 | noncoding | -0. 07168   | 6375 | 6606 | 11362 |
| MSTRG. 25174. 2 | coding    | 0. 332      | 252  | 1275 | 1432  |
| MSTRG. 25174. 3 | coding    | 0. 33       | 252  | 966  | 1229  |
| MSTRG. 25176. 4 | coding    | 0. 332      | 396  | 861  | 1056  |

|                 |           |             |       |       |       |
|-----------------|-----------|-------------|-------|-------|-------|
| MSTRG. 25176. 5 | coding    | 0. 332      | 282   | 747   | 941   |
| MSTRG. 25181. 1 | coding    | 0. 101      | 1602  | 2346  | 2664  |
| MSTRG. 25185. 1 | coding    | 0. 303      | 267   | 960   | 1658  |
| MSTRG. 25195. 1 | noncoding | -0. 0741376 | 6075  | 6567  | 6724  |
| MSTRG. 25195. 2 | noncoding | -0. 0815104 | 3147  | 3432  | 3588  |
| MSTRG. 25196. 3 | coding    | 0. 42       | 99    | 1830  | 2257  |
| MSTRG. 25196. 4 | coding    | 0. 369      | 582   | 2988  | 3413  |
| MSTRG. 25196. 5 | coding    | 0. 482      | 72    | 1068  | 1317  |
| MSTRG. 25196. 6 | coding    | 0. 454      | 81    | 777   | 974   |
| MSTRG. 25198. 1 | noncoding | -0. 075776  | 60    | 90    | 252   |
| MSTRG. 25190. 3 | coding    | 0. 537      | 0     | 1953  | 2162  |
| MSTRG. 25205. 4 | coding    | 0. 155      | 3330  | 8403  | 11675 |
| MSTRG. 25205. 5 | coding    | 0. 155      | 2094  | 7167  | 10439 |
| MSTRG. 25206. 1 | noncoding | -0. 0290816 | 690   | 777   | 6205  |
| MSTRG. 25205. 6 | coding    | 0. 153      | 117   | 1275  | 4450  |
| MSTRG. 25207. 1 | noncoding | -0. 0155648 | 78    | 474   | 5238  |
| MSTRG. 25207. 2 | noncoding | -0. 0831488 | 7026  | 7437  | 7627  |
| MSTRG. 25207. 3 | noncoding | -0. 0897024 | 0     | 702   | 6341  |
| MSTRG. 25207. 4 | noncoding | -0. 0626688 | 351   | 504   | 3421  |
| MSTRG. 25208. 1 | noncoding | -0. 073728  | 12    | 72    | 228   |
| MSTRG. 25211. 1 | noncoding | -0. 008192  | 1836  | 1962  | 4934  |
| MSTRG. 25214. 1 | noncoding | -0. 1052672 | 1182  | 1542  | 1695  |
| MSTRG. 25214. 2 | noncoding | -0. 03072   | 0     | 105   | 1465  |
| MSTRG. 25217. 1 | coding    | 0. 096      | 285   | 1368  | 2281  |
| MSTRG. 25232. 1 | noncoding | -0. 032768  | 294   | 393   | 728   |
| MSTRG. 25248. 1 | noncoding | -0. 028672  | 8400  | 8523  | 8683  |
| MSTRG. 25254. 2 | coding    | 0. 188      | 54    | 1680  | 2374  |
| MSTRG. 25221. 1 | noncoding | -0. 0004096 | 264   | 264   | 449   |
| MSTRG. 25224. 3 | noncoding | -0. 0004096 | 192   | 297   | 453   |
| MSTRG. 25226. 1 | noncoding | -0. 1171456 | 0     | 444   | 42879 |
| MSTRG. 25226. 3 | noncoding | -0. 036864  | 17517 | 18192 | 24386 |
| MSTRG. 25226. 5 | noncoding | -0. 0360448 | 21093 | 21456 | 29446 |
| MSTRG. 25226. 4 | noncoding | -0. 0671744 | 4653  | 4914  | 5068  |
| MSTRG. 25226. 8 | noncoding | -0. 0360448 | 9723  | 10086 | 18140 |
| MSTRG. 25255. 4 | coding    | 0. 163      | 1995  | 2346  | 3569  |
| MSTRG. 25255. 1 | coding    | 0. 154      | 2043  | 3435  | 3842  |
| MSTRG. 25256. 1 | noncoding | -0. 016384  | 1191  | 1284  | 3715  |
| MSTRG. 25257. 1 | noncoding | -0. 024576  | 1539  | 1620  | 2836  |
| MSTRG. 25258. 1 | noncoding | -0. 0151552 | 3954  | 3981  | 4419  |
| MSTRG. 25255. 6 | coding    | 0. 124      | 714   | 1134  | 1523  |
| MSTRG. 25268. 6 | coding    | 0. 261      | 4575  | 5865  | 8427  |
| MSTRG. 25269. 1 | noncoding | -0. 0004096 | 1848  | 1848  | 2351  |
| MSTRG. 25280. 2 | coding    | 0. 252      | 0     | 354   | 711   |
| MSTRG. 25261. 1 | coding    | 0. 135      | 4866  | 5160  | 8665  |
| MSTRG. 25262. 1 | noncoding | -0. 073728  | 864   | 894   | 1090  |
| MSTRG. 25262. 2 | noncoding | -0. 018432  | 2208  | 2328  | 2753  |
| MSTRG. 25265. 1 | noncoding | -0. 002048  | 51    | 174   | 327   |
| MSTRG. 25281. 1 | noncoding | -0. 18432   | 447   | 492   | 648   |
| MSTRG. 25285. 2 | coding    | 0. 346      | 0     | 345   | 610   |
| MSTRG. 25290. 3 | coding    | 0. 165      | 906   | 2805  | 3122  |
| MSTRG. 25297. 2 | noncoding | -0. 16384   | 126   | 189   | 467   |
| MSTRG. 25298. 1 | noncoding | -0. 045056  | 2580  | 2745  | 8269  |
| MSTRG. 25302. 1 | noncoding | -0. 0053248 | 132   | 288   | 450   |
| MSTRG. 25310. 1 | noncoding | -0. 036864  | 684   | 801   | 1409  |

|                 |           |             |       |       |       |
|-----------------|-----------|-------------|-------|-------|-------|
| MSTRG. 25318. 1 | coding    | 0. 136      | 510   | 1908  | 5283  |
| MSTRG. 25315. 1 | noncoding | -0. 0438272 | 2595  | 2907  | 3060  |
| MSTRG. 25327. 1 | coding    | 0. 199      | 297   | 5274  | 6625  |
| MSTRG. 25327. 2 | coding    | 0. 203      | 0     | 4992  | 6227  |
| MSTRG. 25327. 3 | coding    | 0. 195      | 252   | 5220  | 6422  |
| MSTRG. 25328. 1 | noncoding | -0. 049152  | 1386  | 1479  | 1634  |
| MSTRG. 25329. 1 | noncoding | -0. 008192  | 132   | 264   | 432   |
| MSTRG. 25335. 1 | coding    | 0. 05       | 180   | 2787  | 4392  |
| MSTRG. 25335. 2 | noncoding | -0. 0782336 | 390   | 714   | 924   |
| MSTRG. 25342. 1 | coding    | 0. 128      | 0     | 2358  | 8478  |
| MSTRG. 25342. 4 | coding    | 0. 113      | 18    | 2409  | 3121  |
| MSTRG. 25342. 5 | coding    | 0. 129      | 1596  | 3555  | 4266  |
| MSTRG. 25343. 1 | coding    | 0. 404      | 0     | 222   | 1942  |
| MSTRG. 25348. 2 | coding    | 0. 334      | 0     | 7353  | 8093  |
| MSTRG. 25350. 2 | coding    | 0. 129      | 3     | 672   | 1348  |
| MSTRG. 25351. 2 | coding    | 0. 103      | 168   | 7476  | 8899  |
| MSTRG. 25351. 3 | coding    | 0. 102      | 168   | 7488  | 8911  |
| MSTRG. 25351. 4 | coding    | 0. 098      | 132   | 7125  | 8545  |
| MSTRG. 25356. 2 | noncoding | -0. 0073728 | 39    | 186   | 529   |
| MSTRG. 25359. 1 | coding    | 0. 072      | 1095  | 1701  | 1883  |
| MSTRG. 25359. 4 | noncoding | -0. 0454656 | 558   | 864   | 2800  |
| MSTRG. 25353. 1 | coding    | 0. 254      | 15    | 711   | 1332  |
| MSTRG. 25353. 3 | coding    | 0. 263      | 213   | 840   | 1460  |
| MSTRG. 25354. 1 | noncoding | -0. 04096   | 309   | 351   | 554   |
| MSTRG. 25354. 2 | noncoding | -0. 04096   | 0     | 87    | 442   |
| MSTRG. 25361. 1 | coding    | 0. 074      | 0     | 858   | 5129  |
| MSTRG. 25361. 3 | noncoding | -0. 0520192 | 0     | 630   | 1558  |
| MSTRG. 25364. 1 | noncoding | -0. 0237568 | 3651  | 3804  | 4927  |
| MSTRG. 25362. 2 | coding    | 0. 186      | 0     | 912   | 1145  |
| MSTRG. 25372. 1 | noncoding | -0. 0438272 | 0     | 360   | 1132  |
| MSTRG. 25384. 1 | noncoding | -0. 0643072 | 2217  | 2988  | 6240  |
| MSTRG. 25384. 2 | noncoding | -0. 0643072 | 1230  | 2001  | 5039  |
| MSTRG. 25384. 3 | coding    | 0. 1        | 648   | 2085  | 4718  |
| MSTRG. 25384. 6 | noncoding | -0. 1060864 | 0     | 198   | 3715  |
| MSTRG. 25388. 1 | coding    | 0. 061      | 1137  | 2628  | 6357  |
| MSTRG. 25388. 5 | coding    | 0. 061      | 1137  | 2628  | 4953  |
| MSTRG. 25388. 6 | coding    | 0. 061      | 1674  | 3165  | 5056  |
| MSTRG. 25388. 7 | coding    | 0. 023      | 0     | 285   | 2264  |
| MSTRG. 25389. 1 | coding    | 0. 1        | 3624  | 3822  | 5097  |
| MSTRG. 25390. 1 | coding    | 0. 132      | 3300  | 3552  | 11291 |
| MSTRG. 25389. 2 | noncoding | -0. 008192  | 2835  | 2946  | 3937  |
| MSTRG. 25389. 3 | noncoding | -0. 0024576 | 1221  | 1269  | 1855  |
| MSTRG. 25409. 4 | coding    | 0. 008      | 150   | 987   | 3756  |
| MSTRG. 25409. 5 | coding    | 0. 016      | 150   | 1005  | 2417  |
| MSTRG. 25409. 7 | noncoding | -0. 036864  | 150   | 270   | 1142  |
| MSTRG. 25410. 2 | coding    | 0. 039      | 0     | 738   | 3773  |
| MSTRG. 25413. 2 | coding    | 0. 13       | 0     | 1164  | 2839  |
| MSTRG. 25413. 3 | coding    | 0. 13       | 0     | 1164  | 2169  |
| MSTRG. 25413. 4 | coding    | 0. 13       | 0     | 1164  | 2150  |
| MSTRG. 25413. 5 | coding    | 0. 13       | 0     | 1164  | 2179  |
| MSTRG. 25413. 6 | coding    | 0. 048      | 945   | 1419  | 1575  |
| MSTRG. 25413. 7 | coding    | 0. 15       | 0     | 1218  | 1608  |
| MSTRG. 25415. 1 | coding    | 0. 094      | 3486  | 5010  | 9823  |
| MSTRG. 25415. 2 | coding    | 0. 051      | 11184 | 13092 | 18583 |

|                  |           |             |       |       |       |
|------------------|-----------|-------------|-------|-------|-------|
| MSTRG. 25415. 3  | noncoding | -0. 0155648 | 354   | 513   | 2862  |
| MSTRG. 25415. 4  | coding    | 0. 083      | 4326  | 5472  | 5627  |
| MSTRG. 25417. 1  | noncoding | -0. 0004096 | 0     | 0     | 1202  |
| MSTRG. 25399. 1  | coding    | 0. 053      | 2538  | 2751  | 2987  |
| MSTRG. 25391. 1  | noncoding | -0. 0004096 | 0     | 0     | 301   |
| MSTRG. 25405. 2  | coding    | 0. 199      | 957   | 1410  | 1895  |
| MSTRG. 25406. 1  | noncoding | -0. 0479232 | 1470  | 1542  | 3551  |
| MSTRG. 25405. 3  | noncoding | -0. 0004096 | 198   | 198   | 714   |
| MSTRG. 25433. 2  | coding    | 0. 328      | 300   | 591   | 1874  |
| MSTRG. 25434. 1  | noncoding | -0. 0004096 | 0     | 0     | 881   |
| MSTRG. 25435. 3  | coding    | 0. 086      | 0     | 666   | 1455  |
| MSTRG. 25436. 1  | coding    | 0. 071      | 0     | 2046  | 4578  |
| MSTRG. 25436. 2  | coding    | 0. 089      | 0     | 2331  | 8276  |
| MSTRG. 25436. 5  | coding    | 0. 069      | 0     | 2010  | 6502  |
| MSTRG. 25437. 1  | noncoding | -0. 065536  | 186   | 267   | 422   |
| MSTRG. 25441. 2  | coding    | 0. 262      | 0     | 741   | 1713  |
| MSTRG. 25447. 2  | coding    | 0. 18       | 1992  | 4608  | 6968  |
| MSTRG. 25447. 6  | coding    | 0. 184      | 2412  | 4902  | 7262  |
| MSTRG. 25447. 7  | coding    | 0. 18       | 1425  | 3912  | 4417  |
| MSTRG. 25448. 1  | noncoding | -0. 053248  | 6627  | 6729  | 14866 |
| MSTRG. 25444. 1  | noncoding | -0. 079872  | 72    | 795   | 1474  |
| MSTRG. 25451. 4  | noncoding | -0. 0094208 | 156   | 375   | 1430  |
| MSTRG. 25462. 1  | noncoding | -0. 0299008 | 3     | 462   | 784   |
| MSTRG. 25463. 1  | coding    | 0. 202      | 1332  | 2151  | 2357  |
| MSTRG. 25465. 1  | noncoding | -0. 0004096 | 4626  | 4740  | 5133  |
| MSTRG. 25472. 5  | coding    | 0. 103      | 2601  | 3174  | 4124  |
| MSTRG. 25472. 6  | coding    | 0. 103      | 2130  | 2703  | 3652  |
| MSTRG. 25472. 7  | coding    | 0. 103      | 1818  | 2391  | 3340  |
| MSTRG. 25472. 8  | coding    | 0. 103      | 1812  | 2385  | 3336  |
| MSTRG. 25477. 1  | coding    | 0. 109      | 513   | 2229  | 5869  |
| MSTRG. 25477. 2  | coding    | 0. 12       | 0     | 1557  | 5231  |
| MSTRG. 25478. 1  | noncoding | -0. 0004096 | 150   | 333   | 2937  |
| MSTRG. 25478. 3  | coding    | 0. 02       | 390   | 531   | 1058  |
| MSTRG. 25478. 5  | coding    | 0. 03       | 1161  | 1296  | 1449  |
| MSTRG. 25480. 3  | coding    | 0. 076      | 4878  | 8700  | 11363 |
| MSTRG. 25480. 4  | coding    | 0. 079      | 0     | 3711  | 6358  |
| MSTRG. 25483. 1  | noncoding | -0. 0004096 | 0     | 0     | 307   |
| MSTRG. 25483. 2  | noncoding | -0. 0004096 | 183   | 213   | 681   |
| MSTRG. 25484. 2  | coding    | 0. 225      | 0     | 525   | 1189  |
| MSTRG. 25489. 2  | coding    | 0. 158      | 540   | 771   | 2381  |
| MSTRG. 25489. 3  | coding    | 0. 158      | 138   | 369   | 2832  |
| MSTRG. 25491. 1  | coding    | 0. 085      | 0     | 1434  | 13597 |
| MSTRG. 25492. 4  | noncoding | -0. 1134592 | 0     | 348   | 1368  |
| MSTRG. 25492. 3  | coding    | 0. 278      | 0     | 528   | 3246  |
| MSTRG. 25492. 5  | coding    | 0. 278      | 0     | 528   | 3072  |
| MSTRG. 25499. 3  | noncoding | -0. 06144   | 2193  | 2397  | 4457  |
| MSTRG. 25499. 2  | coding    | 0. 15       | 1887  | 2475  | 3603  |
| MSTRG. 25499. 6  | noncoding | -0. 06144   | 3543  | 3747  | 5750  |
| MSTRG. 25499. 7  | noncoding | -0. 06144   | 1644  | 1848  | 8983  |
| MSTRG. 25499. 8  | coding    | 0. 126      | 1782  | 2193  | 2989  |
| MSTRG. 25499. 10 | noncoding | -0. 024576  | 30    | 534   | 1487  |
| MSTRG. 25508. 1  | noncoding | -0. 0167936 | 48    | 303   | 1788  |
| MSTRG. 25508. 3  | noncoding | -0. 0311296 | 18894 | 19236 | 38923 |
| MSTRG. 25508. 4  | coding    | 0. 199      | 0     | 231   | 8021  |



|                  |           |             |       |       |       |
|------------------|-----------|-------------|-------|-------|-------|
| MSTRG. 25508. 5  | coding    | 0. 199      | 0     | 231   | 2699  |
| MSTRG. 25508. 6  | noncoding | -0. 0311296 | 7833  | 8175  | 24803 |
| MSTRG. 25508. 7  | noncoding | -0. 12288   | 1806  | 1863  | 2019  |
| MSTRG. 25509. 1  | noncoding | -0. 004096  | 5406  | 5550  | 14736 |
| MSTRG. 25508. 9  | noncoding | -0. 034816  | 12462 | 12765 | 16875 |
| MSTRG. 25508. 8  | noncoding | -0. 034816  | 1440  | 1743  | 5854  |
| MSTRG. 25510. 1  | noncoding | -0. 0004096 | 0     | 0     | 217   |
| MSTRG. 25508. 10 | noncoding | -0. 0462848 | 6711  | 6882  | 36845 |
| MSTRG. 25508. 11 | noncoding | -0. 0462848 | 3816  | 3987  | 36294 |
| MSTRG. 25508. 12 | noncoding | -0. 0462848 | 6666  | 6837  | 20867 |
| MSTRG. 25508. 13 | noncoding | -0. 135168  | 4728  | 4767  | 5482  |
| MSTRG. 25511. 1  | noncoding | -0. 094208  | 1470  | 1548  | 2739  |
| MSTRG. 25512. 1  | noncoding | -0. 0483328 | 4317  | 4539  | 15326 |
| MSTRG. 25512. 2  | noncoding | -0. 032768  | 6960  | 7305  | 9003  |
| MSTRG. 25513. 1  | coding    | 0. 018      | 648   | 828   | 2518  |
| MSTRG. 25514. 1  | noncoding | -0. 077824  | 3258  | 3333  | 6360  |
| MSTRG. 25508. 14 | noncoding | -0. 0278528 | 0     | 96    | 1988  |
| MSTRG. 25517. 1  | noncoding | -0. 047104  | 219   | 369   | 3843  |
| MSTRG. 25517. 3  | noncoding | -0. 047104  | 204   | 354   | 1079  |
| MSTRG. 25517. 4  | noncoding | -0. 047104  | 204   | 354   | 4098  |
| MSTRG. 25518. 2  | coding    | 0. 127      | 405   | 3795  | 5150  |
| MSTRG. 25528. 2  | coding    | 0. 114      | 9090  | 11274 | 15915 |
| MSTRG. 25528. 3  | coding    | 0. 123      | 0     | 2436  | 2998  |
| MSTRG. 25529. 1  | noncoding | -0. 0004096 | 672   | 816   | 3827  |
| MSTRG. 25528. 4  | noncoding | -0. 024576  | 1749  | 1881  | 8754  |
| MSTRG. 25530. 1  | coding    | 0. 11       | 5868  | 6099  | 11380 |
| MSTRG. 25531. 1  | noncoding | -0. 0004096 | 0     | 0     | 1806  |
| MSTRG. 25532. 1  | noncoding | -0. 014336  | 2898  | 3075  | 3828  |
| MSTRG. 25537. 2  | noncoding | -0. 063488  | 48    | 339   | 6941  |
| MSTRG. 25537. 1  | noncoding | -0. 063488  | 48    | 339   | 7083  |
| MSTRG. 25537. 3  | noncoding | -0. 063488  | 48    | 339   | 7415  |
| MSTRG. 25540. 1  | coding    | 0. 234      | 327   | 1950  | 2205  |
| MSTRG. 25546. 1  | noncoding | -0. 0057344 | 2928  | 3306  | 3534  |
| MSTRG. 25550. 3  | coding    | 0. 166      | 0     | 1638  | 3671  |
| MSTRG. 25552. 1  | coding    | 0. 134      | 285   | 1800  | 5168  |
| MSTRG. 25552. 2  | coding    | 0. 131      | 225   | 1740  | 4593  |
| MSTRG. 25552. 3  | coding    | 0. 144      | 339   | 1872  | 5240  |
| MSTRG. 25552. 4  | coding    | 0. 131      | 177   | 1692  | 5059  |
| MSTRG. 25552. 5  | coding    | 0. 131      | 168   | 1683  | 4325  |
| MSTRG. 25552. 6  | coding    | 0. 128      | 120   | 1737  | 4220  |
| MSTRG. 25552. 7  | coding    | 0. 128      | 18    | 1635  | 4796  |
| MSTRG. 25552. 9  | coding    | 0. 135      | 81    | 1572  | 4939  |
| MSTRG. 25552. 10 | coding    | 0. 135      | 60    | 1551  | 4404  |
| MSTRG. 25556. 3  | noncoding | -0. 0012288 | 7350  | 7602  | 8588  |
| MSTRG. 25557. 2  | coding    | 0. 179      | 345   | 1053  | 3311  |
| MSTRG. 25571. 1  | noncoding | -0. 0724992 | 0     | 171   | 1412  |
| MSTRG. 25577. 7  | coding    | 0. 206      | 318   | 4860  | 5034  |
| MSTRG. 25577. 8  | coding    | 0. 207      | 318   | 4812  | 4986  |
| MSTRG. 25582. 3  | coding    | 0. 036      | 189   | 1548  | 1726  |
| MSTRG. 25593. 2  | coding    | 0. 112      | 603   | 2208  | 4104  |
| MSTRG. 25594. 1  | noncoding | -0. 0929792 | 0     | 129   | 1113  |
| MSTRG. 25595. 1  | coding    | 0. 138      | 0     | 768   | 7260  |
| MSTRG. 25601. 2  | coding    | 0. 193      | 2277  | 3117  | 10029 |
| MSTRG. 25597. 2  | coding    | 0. 291      | 1182  | 3117  | 3615  |

|                  |           |             |       |       |       |
|------------------|-----------|-------------|-------|-------|-------|
| MSTRG. 25597. 3  | coding    | 0. 084      | 846   | 1086  | 2186  |
| MSTRG. 25598. 2  | noncoding | -0. 045056  | 327   | 399   | 863   |
| MSTRG. 25598. 1  | noncoding | -0. 002048  | 627   | 753   | 944   |
| MSTRG. 25599. 1  | noncoding | -0. 139264  | 2079  | 2142  | 3121  |
| MSTRG. 25597. 4  | noncoding | -0. 0413696 | 3834  | 4224  | 18623 |
| MSTRG. 25602. 1  | coding    | 0. 141      | 4737  | 6750  | 6907  |
| MSTRG. 25602. 2  | coding    | 0. 133      | 0     | 1881  | 2038  |
| MSTRG. 25602. 4  | coding    | 0. 163      | 4716  | 5007  | 6243  |
| MSTRG. 25602. 5  | noncoding | -0. 036864  | 0     | 159   | 1209  |
| MSTRG. 25604. 3  | coding    | 0. 095      | 2454  | 3960  | 4743  |
| MSTRG. 25604. 2  | coding    | 0. 195      | 12    | 570   | 6040  |
| MSTRG. 25615. 2  | coding    | 0. 078      | 7971  | 10350 | 10947 |
| MSTRG. 25615. 6  | coding    | 0. 027      | 3072  | 10044 | 10631 |
| MSTRG. 25615. 7  | coding    | 0. 027      | 2958  | 9927  | 10511 |
| MSTRG. 25615. 9  | coding    | 0. 027      | 2565  | 9624  | 10222 |
| MSTRG. 25615. 10 | coding    | 0. 076      | 1485  | 3948  | 4545  |
| MSTRG. 25607. 5  | coding    | 0. 044      | 1173  | 8253  | 8835  |
| MSTRG. 25608. 1  | noncoding | -0. 008192  | 420   | 510   | 1340  |
| MSTRG. 25609. 1  | noncoding | -0. 028672  | 270   | 348   | 5375  |
| MSTRG. 25610. 1  | noncoding | -0. 008192  | 129   | 261   | 2379  |
| MSTRG. 25610. 2  | coding    | 0. 046      | 3570  | 4215  | 4780  |
| MSTRG. 25611. 1  | noncoding | -0. 0786432 | 63    | 726   | 2976  |
| MSTRG. 25614. 1  | noncoding | -0. 0053248 | 48    | 180   | 335   |
| MSTRG. 25616. 2  | coding    | 0. 389      | 0     | 516   | 1652  |
| MSTRG. 25616. 3  | coding    | 0. 024      | 537   | 1176  | 3233  |
| MSTRG. 25620. 2  | noncoding | -0. 0466944 | 54    | 282   | 6336  |
| MSTRG. 25626. 1  | noncoding | -0. 036864  | 474   | 606   | 2003  |
| MSTRG. 25622. 1  | noncoding | -0. 0004096 | 0     | 0     | 481   |
| MSTRG. 25622. 2  | noncoding | -0. 0004096 | 0     | 0     | 375   |
| MSTRG. 25623. 1  | noncoding | -0. 0110592 | 0     | 12    | 211   |
| MSTRG. 25630. 1  | noncoding | -0. 0004096 | 168   | 168   | 420   |
| MSTRG. 25631. 2  | coding    | 0. 061      | 654   | 1131  | 1467  |
| MSTRG. 25632. 2  | coding    | 0. 121      | 618   | 1005  | 3216  |
| MSTRG. 25632. 4  | coding    | 0. 11       | 534   | 906   | 1647  |
| MSTRG. 25635. 1  | coding    | 0. 053      | 10572 | 10737 | 11265 |
| MSTRG. 25637. 2  | coding    | 0. 235      | 51    | 2970  | 4834  |
| MSTRG. 25638. 1  | coding    | 0. 132      | 1224  | 1464  | 4132  |
| MSTRG. 25638. 2  | coding    | 0. 055      | 189   | 360   | 519   |
| MSTRG. 25642. 1  | noncoding | -0. 0004096 | 0     | 0     | 408   |
| MSTRG. 25642. 2  | noncoding | -0. 077824  | 246   | 276   | 504   |
| MSTRG. 25639. 1  | noncoding | -0. 077824  | 18    | 72    | 393   |
| MSTRG. 25653. 1  | noncoding | -0. 086016  | 1089  | 1143  | 2351  |
| MSTRG. 25654. 2  | coding    | 0. 115      | 3     | 273   | 1395  |
| MSTRG. 25654. 3  | noncoding | -0. 12288   | 0     | 219   | 1152  |
| MSTRG. 25657. 6  | coding    | 0. 149      | 1950  | 3930  | 4201  |
| MSTRG. 25657. 7  | coding    | 0. 101      | 885   | 1911  | 2841  |
| MSTRG. 25664. 2  | coding    | 0. 258      | 159   | 1710  | 2497  |
| MSTRG. 25667. 1  | noncoding | -0. 0012288 | 75    | 168   | 349   |
| MSTRG. 25711. 1  | noncoding | -0. 065536  | 237   | 291   | 1141  |
| MSTRG. 25711. 2  | noncoding | -0. 065536  | 606   | 660   | 1477  |
| MSTRG. 25711. 3  | noncoding | -0. 065536  | 495   | 549   | 1356  |
| MSTRG. 25711. 4  | noncoding | -0. 065536  | 204   | 258   | 1108  |
| MSTRG. 25712. 1  | coding    | 0. 093      | 1722  | 1908  | 3786  |
| MSTRG. 25711. 5  | noncoding | -0. 012288  | 1050  | 1152  | 2097  |

|                 |           |             |       |       |       |
|-----------------|-----------|-------------|-------|-------|-------|
| MSTRG. 25711. 6 | coding    | 0. 098      | 1152  | 1407  | 2046  |
| MSTRG. 25711. 7 | noncoding | -0. 065536  | 2709  | 2763  | 3557  |
| MSTRG. 25707. 1 | noncoding | -0. 012288  | 429   | 495   | 835   |
| MSTRG. 25718. 1 | noncoding | -0. 1024    | 108   | 168   | 602   |
| MSTRG. 25723. 2 | coding    | 0. 4        | 9     | 891   | 1365  |
| MSTRG. 25725. 1 | noncoding | -0. 03072   | 345   | 456   | 671   |
| MSTRG. 25726. 3 | coding    | 0. 32       | 687   | 1068  | 1252  |
| MSTRG. 25730. 2 | noncoding | -0. 1572864 | 396   | 855   | 1010  |
| MSTRG. 25734. 2 | coding    | 0. 29       | 399   | 1836  | 3012  |
| MSTRG. 25734. 3 | coding    | 0. 296      | 6     | 1455  | 2636  |
| MSTRG. 25736. 1 | noncoding | -0. 0659456 | 0     | 459   | 778   |
| MSTRG. 25734. 4 | coding    | 0. 259      | 0     | 567   | 1746  |
| MSTRG. 25737. 2 | coding    | 0. 164      | 0     | 987   | 2652  |
| MSTRG. 25747. 4 | coding    | 0. 473      | 60    | 7011  | 9126  |
| MSTRG. 25747. 2 | coding    | 0. 48       | 0     | 9231  | 9650  |
| MSTRG. 25748. 1 | noncoding | -0. 069632  | 174   | 213   | 2419  |
| MSTRG. 25748. 2 | noncoding | -0. 069632  | 102   | 141   | 3561  |
| MSTRG. 25739. 1 | noncoding | -0. 053248  | 207   | 270   | 757   |
| MSTRG. 25749. 1 | noncoding | -0. 167936  | 42    | 99    | 685   |
| MSTRG. 25750. 1 | noncoding | -0. 024576  | 123   | 246   | 403   |
| MSTRG. 25750. 2 | noncoding | -0. 0118784 | 9     | 183   | 340   |
| MSTRG. 25752. 1 | coding    | 0. 267      | 288   | 564   | 2192  |
| MSTRG. 25760. 4 | coding    | 0. 14       | 231   | 2601  | 5418  |
| MSTRG. 25757. 2 | coding    | 0. 148      | 39    | 492   | 980   |
| MSTRG. 25771. 2 | coding    | 0. 374      | 864   | 4020  | 11892 |
| MSTRG. 25772. 1 | noncoding | -0. 04096   | 576   | 801   | 1502  |
| MSTRG. 25771. 3 | coding    | 0. 385      | 228   | 3165  | 7875  |
| MSTRG. 25771. 4 | coding    | 0. 331      | 141   | 2223  | 6934  |
| MSTRG. 25771. 5 | coding    | 0. 294      | 0     | 318   | 7071  |
| MSTRG. 25778. 1 | coding    | 0. 187      | 822   | 1971  | 2963  |
| MSTRG. 25779. 2 | coding    | 0. 026      | 534   | 756   | 1130  |
| MSTRG. 25779. 3 | noncoding | -0. 0090112 | 651   | 822   | 1851  |
| MSTRG. 25773. 1 | noncoding | -0. 008192  | 0     | 72    | 500   |
| MSTRG. 25781. 2 | coding    | 0. 254      | 81    | 2769  | 3337  |
| MSTRG. 25782. 1 | noncoding | -0. 0131072 | 123   | 309   | 472   |
| MSTRG. 25782. 2 | noncoding | -0. 004096  | 162   | 282   | 436   |
| MSTRG. 25784. 1 | noncoding | -0. 0524288 | 11955 | 12423 | 16447 |
| MSTRG. 25785. 2 | coding    | 0. 153      | 1155  | 1548  | 3735  |
| MSTRG. 25790. 1 | noncoding | -0. 069632  | 153   | 243   | 668   |
| MSTRG. 25796. 1 | coding    | 0. 281      | 1770  | 3603  | 4655  |
| MSTRG. 25796. 2 | coding    | 0. 281      | 1470  | 3303  | 4335  |
| MSTRG. 25798. 1 | noncoding | -0. 047104  | 2475  | 2673  | 3653  |
| MSTRG. 25799. 1 | noncoding | -0. 0385024 | 819   | 1158  | 2572  |
| MSTRG. 25802. 1 | noncoding | -0. 0110592 | 288   | 594   | 879   |
| MSTRG. 25802. 2 | noncoding | -0. 0507904 | 324   | 576   | 1259  |
| MSTRG. 25803. 1 | noncoding | -0. 045056  | 111   | 318   | 689   |
| MSTRG. 25808. 1 | noncoding | -0. 0647168 | 0     | 576   | 1838  |
| MSTRG. 25809. 1 | noncoding | -0. 0667648 | 858   | 1188  | 3260  |
| MSTRG. 25809. 2 | noncoding | -0. 0667648 | 798   | 1128  | 2587  |
| MSTRG. 25809. 3 | noncoding | -0. 0667648 | 858   | 1188  | 2629  |
| MSTRG. 25806. 1 | noncoding | -0. 0589824 | 324   | 759   | 982   |
| MSTRG. 25817. 2 | coding    | 0. 523      | 0     | 1314  | 2247  |
| MSTRG. 25817. 3 | coding    | 0. 529      | 0     | 1257  | 2261  |
| MSTRG. 25828. 1 | coding    | 0. 332      | 99    | 2163  | 2371  |

|                  |           |             |       |       |       |
|------------------|-----------|-------------|-------|-------|-------|
| MSTRG. 25824. 4  | coding    | 0. 359      | 15    | 1734  | 2041  |
| MSTRG. 25847. 1  | noncoding | -0. 110592  | 468   | 540   | 696   |
| MSTRG. 25848. 1  | noncoding | -0. 0565248 | 369   | 816   | 1081  |
| MSTRG. 25848. 2  | noncoding | -0. 0565248 | 306   | 753   | 1018  |
| MSTRG. 25849. 1  | noncoding | -0. 0700416 | 60    | 264   | 421   |
| MSTRG. 25857. 1  | noncoding | -0. 028672  | 1188  | 1272  | 6607  |
| MSTRG. 25858. 1  | noncoding | -0. 06144   | 2127  | 2226  | 3482  |
| MSTRG. 25857. 2  | noncoding | -0. 0299008 | 177   | 237   | 393   |
| MSTRG. 25861. 1  | noncoding | -0. 0221184 | 363   | 558   | 847   |
| MSTRG. 25862. 1  | noncoding | -0. 0221184 | 72    | 258   | 415   |
| MSTRG. 25869. 1  | noncoding | -0. 1277952 | 21    | 51    | 205   |
| MSTRG. 25872. 1  | noncoding | -0. 028672  | 123   | 207   | 406   |
| MSTRG. 25897. 4  | coding    | 0. 143      | 90    | 558   | 1542  |
| MSTRG. 25897. 6  | coding    | 0. 143      | 90    | 558   | 1436  |
| MSTRG. 25897. 3  | coding    | 0. 143      | 3246  | 3714  | 4580  |
| MSTRG. 25897. 7  | coding    | 0. 143      | 90    | 558   | 1440  |
| MSTRG. 25898. 1  | noncoding | -0. 032768  | 420   | 465   | 2869  |
| MSTRG. 25897. 11 | noncoding | -0. 118784  | 423   | 426   | 1765  |
| MSTRG. 25897. 12 | noncoding | -0. 0065536 | 606   | 777   | 3440  |
| MSTRG. 25897. 13 | coding    | 0. 03       | 234   | 546   | 4352  |
| MSTRG. 25897. 14 | noncoding | -0. 016384  | 1479  | 1563  | 5061  |
| MSTRG. 25874. 2  | coding    | 0. 377      | 348   | 4179  | 4964  |
| MSTRG. 25874. 1  | coding    | 0. 42       | 150   | 4641  | 5426  |
| MSTRG. 25907. 2  | coding    | 0. 204      | 0     | 531   | 1342  |
| MSTRG. 25907. 3  | coding    | 0. 132      | 0     | 699   | 19924 |
| MSTRG. 25911. 2  | coding    | 0. 145      | 585   | 1335  | 1834  |
| MSTRG. 25912. 2  | coding    | 0. 045      | 1056  | 1995  | 2312  |
| MSTRG. 25916. 1  | coding    | 0. 123      | 1155  | 1650  | 3794  |
| MSTRG. 25916. 2  | coding    | 0. 123      | 1041  | 1536  | 3680  |
| MSTRG. 25917. 1  | noncoding | -0. 086016  | 84    | 111   | 267   |
| MSTRG. 25923. 1  | noncoding | -0. 0155648 | 936   | 1068  | 1748  |
| MSTRG. 25926. 4  | coding    | 0. 231      | 1974  | 2682  | 3431  |
| MSTRG. 25926. 5  | coding    | 0. 182      | 0     | 1152  | 1901  |
| MSTRG. 25927. 1  | noncoding | -0. 0024576 | 633   | 672   | 3352  |
| MSTRG. 25928. 1  | noncoding | -0. 131072  | 159   | 177   | 1857  |
| MSTRG. 25926. 6  | coding    | 0. 129      | 0     | 228   | 1515  |
| MSTRG. 25929. 1  | noncoding | -0. 036864  | 3618  | 3744  | 5050  |
| MSTRG. 25940. 1  | coding    | 0. 189      | 198   | 1641  | 1795  |
| MSTRG. 25940. 5  | coding    | 0. 214      | 282   | 1671  | 1844  |
| MSTRG. 25940. 3  | coding    | 0. 197      | 282   | 1731  | 1974  |
| MSTRG. 25949. 3  | coding    | 0. 531      | 5103  | 9267  | 15747 |
| MSTRG. 25950. 1  | noncoding | -0. 0626688 | 762   | 1080  | 3394  |
| MSTRG. 25951. 1  | noncoding | -0. 0446464 | 3     | 540   | 5369  |
| MSTRG. 25949. 5  | coding    | 0. 501      | 144   | 3723  | 10204 |
| MSTRG. 25949. 6  | coding    | 0. 47       | 2511  | 4941  | 11330 |
| MSTRG. 25949. 7  | coding    | 0. 419      | 387   | 2454  | 17518 |
| MSTRG. 25949. 8  | coding    | 0. 473      | 186   | 2391  | 2546  |
| MSTRG. 25956. 1  | noncoding | -0. 0282624 | 213   | 378   | 532   |
| MSTRG. 25958. 1  | noncoding | -0. 0299008 | 23496 | 23691 | 26829 |
| MSTRG. 25958. 2  | noncoding | -0. 0069632 | 5913  | 6078  | 8176  |
| MSTRG. 25958. 3  | noncoding | -0. 0299008 | 441   | 636   | 3776  |
| MSTRG. 25959. 1  | noncoding | -0. 069632  | 7728  | 7974  | 8696  |
| MSTRG. 25959. 2  | noncoding | -0. 069632  | 10080 | 10326 | 10958 |
| MSTRG. 25959. 3  | coding    | 0. 113      | 3948  | 4458  | 6712  |

|                  |           |             |       |       |       |
|------------------|-----------|-------------|-------|-------|-------|
| MSTRG. 25959. 5  | noncoding | -0. 069632  | 15651 | 15897 | 16774 |
| MSTRG. 25959. 4  | noncoding | -0. 069632  | 16002 | 16248 | 17125 |
| MSTRG. 25959. 6  | noncoding | -0. 02048   | 2016  | 2130  | 4839  |
| MSTRG. 25959. 7  | noncoding | -0. 043008  | 279   | 771   | 13851 |
| MSTRG. 25959. 8  | noncoding | -0. 0077824 | 9198  | 9348  | 11937 |
| MSTRG. 25960. 1  | coding    | 0. 401      | 90    | 1380  | 3998  |
| MSTRG. 25972. 1  | noncoding | -0. 028672  | 0     | 63    | 218   |
| MSTRG. 25973. 2  | coding    | 0. 246      | 270   | 768   | 2112  |
| MSTRG. 25973. 3  | coding    | 0. 192      | 714   | 1977  | 3226  |
| MSTRG. 25973. 4  | coding    | 0. 189      | 390   | 1404  | 2653  |
| MSTRG. 25973. 6  | coding    | 0. 24       | 390   | 888   | 2069  |
| MSTRG. 25977. 1  | noncoding | -0. 0802816 | 9882  | 10131 | 10607 |
| MSTRG. 25977. 2  | noncoding | -0. 0622592 | 13326 | 13575 | 16060 |
| MSTRG. 25977. 3  | noncoding | -0. 0262144 | 6075  | 6279  | 7133  |
| MSTRG. 25978. 2  | noncoding | -0. 0458752 | 17070 | 17472 | 18683 |
| MSTRG. 25975. 1  | noncoding | -0. 0004096 | 93    | 156   | 313   |
| MSTRG. 25980. 2  | noncoding | -0. 2592768 | 0     | 267   | 421   |
| MSTRG. 25997. 5  | coding    | 0. 263      | 3564  | 9156  | 12110 |
| MSTRG. 25997. 4  | coding    | 0. 288      | 2757  | 6441  | 9397  |
| MSTRG. 25997. 1  | coding    | 0. 263      | 2619  | 8304  | 11258 |
| MSTRG. 25997. 2  | coding    | 0. 263      | 4119  | 9702  | 12658 |
| MSTRG. 25997. 6  | coding    | 0. 288      | 4113  | 7797  | 10680 |
| MSTRG. 25998. 1  | noncoding | -0. 0270336 | 165   | 789   | 1930  |
| MSTRG. 25997. 8  | coding    | 0. 265      | 60    | 5769  | 6298  |
| MSTRG. 25997. 7  | coding    | 0. 263      | 963   | 6546  | 7077  |
| MSTRG. 25997. 9  | coding    | 0. 263      | 2622  | 8202  | 8731  |
| MSTRG. 25997. 10 | coding    | 0. 263      | 1110  | 6696  | 7215  |
| MSTRG. 25997. 11 | coding    | 0. 264      | 2430  | 8121  | 8637  |
| MSTRG. 25997. 12 | coding    | 0. 288      | 10287 | 13971 | 14487 |
| MSTRG. 25997. 13 | coding    | 0. 15       | 558   | 933   | 5331  |
| MSTRG. 25997. 14 | coding    | 0. 208      | 1485  | 2298  | 2870  |
| MSTRG. 25997. 18 | noncoding | -0. 096256  | 873   | 1230  | 1386  |
| MSTRG. 25997. 19 | noncoding | -0. 0069632 | 726   | 765   | 921   |
| MSTRG. 25997. 20 | noncoding | -0. 032768  | 1113  | 1158  | 4207  |
| MSTRG. 25997. 21 | noncoding | -0. 0004096 | 0     | 0     | 2487  |
| MSTRG. 25989. 1  | noncoding | -0. 0303104 | 19002 | 19770 | 23672 |
| MSTRG. 25989. 2  | noncoding | -0. 0405504 | 8823  | 9522  | 39319 |
| MSTRG. 25989. 3  | noncoding | -0. 0405504 | 1257  | 1956  | 23588 |
| MSTRG. 25989. 5  | noncoding | -0. 0405504 | 1254  | 1953  | 32246 |
| MSTRG. 25989. 6  | noncoding | -0. 0303104 | 11310 | 12078 | 15457 |
| MSTRG. 25991. 1  | noncoding | -0. 065536  | 6321  | 6894  | 20908 |
| MSTRG. 25991. 2  | noncoding | -0. 065536  | 5874  | 6447  | 18247 |
| MSTRG. 25991. 3  | noncoding | -0. 065536  | 8058  | 8631  | 20275 |
| MSTRG. 25991. 4  | noncoding | -0. 065536  | 8001  | 8574  | 22100 |
| MSTRG. 25991. 5  | noncoding | -0. 065536  | 7710  | 8283  | 19830 |
| MSTRG. 25985. 2  | coding    | 0. 384      | 0     | 1254  | 5532  |
| MSTRG. 25986. 1  | noncoding | -0. 0679936 | 6609  | 7077  | 7329  |
| MSTRG. 25992. 2  | coding    | 0. 433      | 0     | 1821  | 3054  |
| MSTRG. 25993. 1  | noncoding | -0. 0110592 | 3312  | 3501  | 6645  |
| MSTRG. 25994. 1  | noncoding | -0. 0004096 | 3690  | 3822  | 4359  |
| MSTRG. 25994. 2  | noncoding | -0. 016384  | 1860  | 1977  | 6254  |
| MSTRG. 25995. 1  | noncoding | -0. 0196608 | 1365  | 1500  | 6918  |
| MSTRG. 25992. 3  | coding    | 0. 433      | 1071  | 1575  | 13343 |
| MSTRG. 25992. 4  | coding    | 0. 632      | 0     | 600   | 6482  |

|               |           |            |      |       |       |
|---------------|-----------|------------|------|-------|-------|
| MSTRG.26010.2 | coding    | 0.329      | 915  | 3051  | 4100  |
| MSTRG.26010.3 | noncoding | -0.0135168 | 1911 | 2055  | 2682  |
| MSTRG.26016.1 | noncoding | -0.0978944 | 1488 | 1761  | 11793 |
| MSTRG.26018.1 | noncoding | -0.004096  | 75   | 213   | 1578  |
| MSTRG.26021.1 | noncoding | -0.339968  | 942  | 966   | 2418  |
| MSTRG.26026.5 | noncoding | -0.0512    | 51   | 249   | 805   |
| MSTRG.26026.4 | noncoding | -0.0393216 | 219  | 459   | 820   |
| MSTRG.26026.2 | noncoding | -0.0585728 | 327  | 528   | 1082  |
| MSTRG.26026.3 | noncoding | -0.0671744 | 42   | 270   | 824   |
| MSTRG.26028.1 | noncoding | -0.1318912 | 0    | 114   | 2305  |
| MSTRG.26033.1 | coding    | 0.27       | 174  | 1131  | 1293  |
| MSTRG.26034.1 | noncoding | -0.159744  | 135  | 177   | 331   |
| MSTRG.26034.3 | noncoding | -0.0217088 | 384  | 513   | 2331  |
| MSTRG.26034.2 | noncoding | -0.0253952 | 1884 | 2073  | 4955  |
| MSTRG.26034.4 | noncoding | -0.0217088 | 189  | 318   | 4973  |
| MSTRG.26034.5 | noncoding | -0.0217088 | 189  | 318   | 2173  |
| MSTRG.26034.6 | noncoding | -0.024576  | 267  | 333   | 1542  |
| MSTRG.26034.7 | noncoding | -0.0319488 | 2715 | 2841  | 4006  |
| MSTRG.26031.2 | coding    | 0.185      | 174  | 741   | 897   |
| MSTRG.26031.3 | noncoding | -0.0151552 | 123  | 288   | 442   |
| MSTRG.26035.2 | coding    | 0.26       | 0    | 6270  | 7070  |
| MSTRG.26035.3 | coding    | 0.251      | 0    | 6327  | 7160  |
| MSTRG.26036.1 | coding    | 0.315      | 327  | 1560  | 2325  |
| MSTRG.26038.2 | coding    | 0.332      | 741  | 2241  | 2412  |
| MSTRG.26038.3 | coding    | 0.332      | 738  | 2238  | 2409  |
| MSTRG.26037.1 | coding    | 0.451      | 153  | 1101  | 1309  |
| MSTRG.26041.2 | coding    | 0.478      | 99   | 3072  | 3647  |
| MSTRG.26042.1 | coding    | 0.393      | 0    | 1434  | 2141  |
| MSTRG.26042.2 | coding    | 0.396      | 0    | 1425  | 1876  |
| MSTRG.26051.1 | coding    | 0.592      | 36   | 4146  | 8774  |
| MSTRG.26052.1 | coding    | 0.442      | 1245 | 2874  | 4419  |
| MSTRG.26053.3 | noncoding | -0.07168   | 21   | 255   | 447   |
| MSTRG.26053.4 | coding    | 0.199      | 678  | 2661  | 2943  |
| MSTRG.26045.2 | coding    | 0.339      | 0    | 768   | 1229  |
| MSTRG.26048.1 | noncoding | -0.0802816 | 276  | 315   | 469   |
| MSTRG.26047.2 | coding    | 0.249      | 0    | 726   | 1448  |
| MSTRG.26059.1 | coding    | 0.407      | 3    | 3138  | 3971  |
| MSTRG.26059.2 | coding    | 0.456      | 24   | 2832  | 3667  |
| MSTRG.26083.4 | coding    | 0.372      | 450  | 4347  | 5228  |
| MSTRG.26083.5 | coding    | 0.369      | 249  | 4164  | 5044  |
| MSTRG.26087.7 | noncoding | -0.069632  | 9906 | 10134 | 10290 |
| MSTRG.26087.6 | noncoding | -0.139264  | 0    | 315   | 4148  |
| MSTRG.26087.5 | coding    | 0.22       | 0    | 2817  | 3517  |
| MSTRG.26088.1 | noncoding | -0.0217088 | 3996 | 4143  | 7531  |
| MSTRG.26089.1 | noncoding | -0.04096   | 5196 | 5370  | 6681  |
| MSTRG.26091.1 | coding    | 0.213      | 0    | 1803  | 7219  |
| MSTRG.26091.4 | coding    | 0.213      | 54   | 1758  | 3141  |
| MSTRG.26091.2 | coding    | 0.21       | 27   | 1863  | 3246  |
| MSTRG.26093.1 | noncoding | -0.1990656 | 0    | 90    | 520   |
| MSTRG.26096.1 | noncoding | -0.0094208 | 261  | 519   | 979   |
| MSTRG.26102.2 | coding    | 0.46       | 138  | 699   | 1474  |
| MSTRG.26106.1 | noncoding | -0.0335872 | 2379 | 3489  | 15798 |
| MSTRG.26106.2 | noncoding | -0.0335872 | 2379 | 3489  | 13290 |
| MSTRG.26107.2 | noncoding | -0.0290816 | 45   | 234   | 3511  |

|                |           |            |      |      |       |
|----------------|-----------|------------|------|------|-------|
| MSTRG.26108.1  | coding    | 0.185      | 0    | 345  | 540   |
| MSTRG.26109.1  | noncoding | -0.0360448 | 0    | 333  | 2726  |
| MSTRG.26111.4  | coding    | 0.222      | 1050 | 3819 | 3973  |
| MSTRG.26112.2  | noncoding | -0.083968  | 0    | 93   | 423   |
| MSTRG.26112.3  | coding    | 0.111      | 120  | 417  | 1127  |
| MSTRG.26112.4  | coding    | 0.065      | 93   | 360  | 860   |
| MSTRG.26113.1  | noncoding | -0.086016  | 885  | 921  | 1358  |
| MSTRG.26118.3  | noncoding | -0.0180224 | 1845 | 2454 | 4374  |
| MSTRG.26118.11 | coding    | 0.21       | 213  | 1350 | 6181  |
| MSTRG.26118.12 | coding    | 0.151      | 138  | 1398 | 9895  |
| MSTRG.26118.13 | coding    | 0.194      | 0    | 1425 | 4935  |
| MSTRG.26120.1  | noncoding | -0.0086016 | 3447 | 3618 | 4674  |
| MSTRG.26121.1  | noncoding | -0.0024576 | 2424 | 2625 | 3028  |
| MSTRG.26123.1  | coding    | 0.233      | 276  | 1344 | 3287  |
| MSTRG.26123.2  | coding    | 0.224      | 0    | 873  | 1408  |
| MSTRG.26123.8  | coding    | 0.212      | 0    | 849  | 1850  |
| MSTRG.26123.10 | coding    | 0.25       | 0    | 975  | 1335  |
| MSTRG.26123.12 | coding    | 0.201      | 243  | 969  | 1328  |
| MSTRG.26123.11 | coding    | 0.226      | 0    | 876  | 1235  |
| MSTRG.26123.9  | coding    | 0.19       | 285  | 990  | 1146  |
| MSTRG.26123.14 | coding    | 0.218      | 252  | 741  | 898   |
| MSTRG.26123.13 | coding    | 0.124      | 417  | 783  | 938   |
| MSTRG.26124.2  | noncoding | -0.094208  | 0    | 390  | 5382  |
| MSTRG.26126.2  | coding    | 0.361      | 0    | 2265 | 4109  |
| MSTRG.26126.4  | coding    | 0.126      | 1695 | 2112 | 3476  |
| MSTRG.26122.2  | coding    | 0.29       | 0    | 1056 | 1474  |
| MSTRG.26138.1  | noncoding | -0.024576  | 93   | 105  | 604   |
| MSTRG.26139.1  | noncoding | -0.110592  | 294  | 360  | 2457  |
| MSTRG.26142.2  | coding    | 0.34       | 27   | 633  | 1049  |
| MSTRG.26142.3  | coding    | 0.327      | 1461 | 2043 | 2460  |
| MSTRG.26147.3  | coding    | 0.222      | 0    | 1794 | 2064  |
| MSTRG.26148.1  | noncoding | -0.0012288 | 4551 | 4662 | 9818  |
| MSTRG.26147.6  | coding    | 0.3        | 6    | 1272 | 3220  |
| MSTRG.26154.2  | coding    | 0.328      | 708  | 1254 | 2253  |
| MSTRG.26154.3  | coding    | 0.367      | 573  | 1161 | 2162  |
| MSTRG.26158.3  | coding    | 0.172      | 270  | 720  | 1162  |
| MSTRG.26163.1  | noncoding | -0.045056  | 216  | 270  | 560   |
| MSTRG.26171.1  | coding    | 0.328      | 186  | 576  | 6146  |
| MSTRG.26171.3  | noncoding | -0.088064  | 1122 | 1455 | 7785  |
| MSTRG.26171.4  | noncoding | -0.0978944 | 2226 | 2724 | 3672  |
| MSTRG.26171.5  | noncoding | -0.0708608 | 39   | 882  | 1518  |
| MSTRG.26180.1  | coding    | 0.234      | 4104 | 4902 | 7134  |
| MSTRG.26180.2  | coding    | 0.271      | 1152 | 6900 | 8458  |
| MSTRG.26180.5  | coding    | 0.288      | 0    | 5187 | 6718  |
| MSTRG.26180.6  | coding    | 0.285      | 0    | 4971 | 6529  |
| MSTRG.26180.13 | coding    | 0.278      | 0    | 4782 | 7839  |
| MSTRG.26181.1  | noncoding | -0.0458752 | 174  | 390  | 3014  |
| MSTRG.26180.14 | coding    | 0.047      | 2004 | 2154 | 2527  |
| MSTRG.26180.17 | noncoding | -0.012288  | 732  | 870  | 2256  |
| MSTRG.26180.18 | noncoding | -0.2269184 | 0    | 186  | 1326  |
| MSTRG.26180.19 | noncoding | -0.2162688 | 0    | 204  | 9047  |
| MSTRG.26180.20 | noncoding | -0.114688  | 0    | 378  | 26612 |
| MSTRG.26180.21 | coding    | 0.088      | 1905 | 2826 | 8254  |
| MSTRG.26184.2  | coding    | 0.23       | 0    | 774  | 1338  |

|                  |           |             |      |      |       |
|------------------|-----------|-------------|------|------|-------|
| MSTRG. 26184. 3  | coding    | 0. 221      | 0    | 636  | 963   |
| MSTRG. 26184. 5  | coding    | 0. 199      | 0    | 585  | 1096  |
| MSTRG. 26185. 1  | coding    | 0. 343      | 696  | 3441 | 4473  |
| MSTRG. 26185. 3  | coding    | 0. 347      | 399  | 3180 | 4254  |
| MSTRG. 26186. 1  | noncoding | -0. 1024    | 216  | 270  | 492   |
| MSTRG. 26187. 1  | noncoding | -0. 126976  | 585  | 669  | 824   |
| MSTRG. 26182. 2  | coding    | 0. 093      | 120  | 1251 | 1683  |
| MSTRG. 26192. 1  | noncoding | -0. 049152  | 180  | 234  | 424   |
| MSTRG. 26194. 17 | noncoding | -0. 0548864 | 588  | 927  | 1423  |
| MSTRG. 26189. 2  | coding    | 0. 38       | 0    | 510  | 667   |
| MSTRG. 26190. 1  | noncoding | -0. 0385024 | 126  | 162  | 1002  |
| MSTRG. 26203. 1  | noncoding | -0. 0004096 | 0    | 0    | 246   |
| MSTRG. 26212. 1  | noncoding | -0. 034816  | 3144 | 3453 | 3666  |
| MSTRG. 26213. 1  | noncoding | -0. 1052672 | 0    | 261  | 1251  |
| MSTRG. 26213. 2  | noncoding | -0. 104448  | 0    | 528  | 724   |
| MSTRG. 26213. 3  | noncoding | -0. 11264   | 0    | 582  | 1158  |
| MSTRG. 26213. 5  | noncoding | -0. 1196032 | 0    | 459  | 993   |
| MSTRG. 26213. 6  | noncoding | -0. 1052672 | 0    | 261  | 1186  |
| MSTRG. 26214. 3  | coding    | 0. 339      | 0    | 1149 | 2289  |
| MSTRG. 26215. 3  | coding    | 0. 195      | 210  | 912  | 1320  |
| MSTRG. 26216. 1  | coding    | 0. 451      | 0    | 504  | 786   |
| MSTRG. 26220. 2  | coding    | 0. 109      | 0    | 501  | 2170  |
| MSTRG. 26224. 1  | coding    | 0. 417      | 531  | 1914 | 2289  |
| MSTRG. 26224. 2  | coding    | 0. 381      | 111  | 1836 | 2211  |
| MSTRG. 26224. 3  | coding    | 0. 448      | 0    | 1500 | 1843  |
| MSTRG. 26224. 4  | coding    | 0. 421      | 228  | 1623 | 1964  |
| MSTRG. 26224. 5  | coding    | 0. 388      | 0    | 1704 | 2057  |
| MSTRG. 26226. 1  | coding    | 0. 199      | 0    | 1242 | 3010  |
| MSTRG. 26226. 2  | noncoding | -0. 0446464 | 1734 | 2214 | 2367  |
| MSTRG. 26227. 1  | noncoding | -0. 059392  | 2625 | 2814 | 3151  |
| MSTRG. 26230. 2  | coding    | 0. 066      | 0    | 660  | 917   |
| MSTRG. 26232. 3  | coding    | 0. 161      | 429  | 4314 | 4501  |
| MSTRG. 26232. 4  | coding    | 0. 161      | 489  | 4356 | 4543  |
| MSTRG. 26232. 5  | coding    | 0. 161      | 765  | 4650 | 4836  |
| MSTRG. 26240. 5  | coding    | 0. 23       | 717  | 5838 | 8868  |
| MSTRG. 26240. 6  | coding    | 0. 23       | 750  | 5871 | 8902  |
| MSTRG. 26240. 7  | coding    | 0. 23       | 837  | 5958 | 8984  |
| MSTRG. 26241. 1  | noncoding | -0. 024576  | 1200 | 1320 | 2166  |
| MSTRG. 26242. 1  | noncoding | -0. 045056  | 2802 | 2862 | 4045  |
| MSTRG. 26244. 1  | noncoding | -0. 065536  | 2217 | 2304 | 7431  |
| MSTRG. 26244. 2  | noncoding | -0. 065536  | 2802 | 2889 | 10588 |
| MSTRG. 26245. 1  | noncoding | -0. 0221184 | 837  | 882  | 1493  |
| MSTRG. 26246. 1  | coding    | 0. 077      | 1041 | 1227 | 2879  |
| MSTRG. 26240. 8  | noncoding | -0. 08192   | 6957 | 7341 | 7701  |
| MSTRG. 26247. 1  | noncoding | -0. 0004096 | 0    | 0    | 299   |
| MSTRG. 26247. 2  | noncoding | -0. 045056  | 51   | 135  | 726   |
| MSTRG. 26249. 1  | noncoding | -0. 0004096 | 0    | 0    | 301   |
| MSTRG. 26239. 1  | coding    | 0. 702      | 0    | 1497 | 2552  |
| MSTRG. 26239. 2  | coding    | 0. 593      | 0    | 2097 | 3114  |
| MSTRG. 26239. 4  | coding    | 0. 572      | 21   | 2052 | 2929  |
| MSTRG. 26259. 5  | noncoding | -0. 1081344 | 195  | 531  | 2217  |
| MSTRG. 26260. 1  | noncoding | -0. 069632  | 1518 | 2451 | 2657  |
| MSTRG. 26257. 1  | noncoding | -0. 0335872 | 471  | 669  | 1169  |
| MSTRG. 26257. 2  | noncoding | -0. 0331776 | 144  | 345  | 676   |



|                 |           |             |      |      |       |
|-----------------|-----------|-------------|------|------|-------|
| MSTRG. 26265. 1 | coding    | 0. 565      | 0    | 537  | 803   |
| MSTRG. 26266. 1 | noncoding | -0. 0401408 | 252  | 384  | 4380  |
| MSTRG. 26266. 2 | noncoding | -0. 0110592 | 4314 | 4458 | 4687  |
| MSTRG. 26266. 3 | noncoding | -0. 053248  | 2451 | 2676 | 8370  |
| MSTRG. 26281. 1 | noncoding | -0. 0004096 | 207  | 312  | 579   |
| MSTRG. 26282. 2 | noncoding | -0. 0585728 | 84   | 783  | 1077  |
| MSTRG. 26286. 2 | coding    | 0. 385      | 321  | 1521 | 2082  |
| MSTRG. 26287. 5 | noncoding | -0. 0131072 | 744  | 978  | 2347  |
| MSTRG. 26287. 3 | noncoding | -0. 0131072 | 810  | 1044 | 2175  |
| MSTRG. 26287. 4 | coding    | 0. 235      | 171  | 1056 | 2535  |
| MSTRG. 26278. 1 | noncoding | -0. 012288  | 162  | 336  | 1762  |
| MSTRG. 26291. 3 | coding    | 0. 334      | 126  | 1878 | 2085  |
| MSTRG. 26291. 6 | coding    | 0. 351      | 1917 | 3546 | 3753  |
| MSTRG. 26291. 4 | coding    | 0. 328      | 0    | 1695 | 1900  |
| MSTRG. 26292. 1 | noncoding | -0. 0135168 | 396  | 513  | 793   |
| MSTRG. 26297. 3 | coding    | 0. 398      | 192  | 1023 | 1622  |
| MSTRG. 26297. 4 | noncoding | -0. 0221184 | 36   | 237  | 438   |
| MSTRG. 26299. 1 | noncoding | -0. 03072   | 882  | 1278 | 1677  |
| MSTRG. 26301. 1 | noncoding | -0. 0233472 | 261  | 435  | 654   |
| MSTRG. 26303. 1 | coding    | 0. 486      | 12   | 2175 | 2450  |
| MSTRG. 26308. 1 | noncoding | -0. 012288  | 330  | 372  | 528   |
| MSTRG. 26308. 2 | noncoding | -0. 0004096 | 537  | 660  | 1069  |
| MSTRG. 26315. 1 | noncoding | -0. 0139264 | 1749 | 1902 | 2055  |
| MSTRG. 26316. 1 | noncoding | -0. 024576  | 384  | 453  | 959   |
| MSTRG. 26321. 1 | coding    | 0. 134      | 219  | 1623 | 6211  |
| MSTRG. 26321. 2 | coding    | 0. 1        | 219  | 1725 | 5536  |
| MSTRG. 26321. 3 | coding    | 0. 119      | 96   | 1134 | 3454  |
| MSTRG. 26321. 4 | coding    | 0. 114      | 618  | 1674 | 1941  |
| MSTRG. 26321. 5 | coding    | 0. 12       | 456  | 618  | 901   |
| MSTRG. 26322. 1 | noncoding | -0. 028672  | 4437 | 4542 | 5065  |
| MSTRG. 26323. 1 | noncoding | -0. 04096   | 0    | 51   | 1334  |
| MSTRG. 26324. 1 | noncoding | -0. 249856  | 903  | 939  | 1472  |
| MSTRG. 26325. 1 | noncoding | -0. 176128  | 2481 | 2496 | 3553  |
| MSTRG. 26338. 1 | noncoding | -0. 0724992 | 75   | 273  | 780   |
| MSTRG. 26340. 1 | coding    | 0. 468      | 114  | 1077 | 2171  |
| MSTRG. 26340. 2 | coding    | 0. 504      | 96   | 1626 | 2180  |
| MSTRG. 26337. 1 | noncoding | -0. 0925696 | 729  | 999  | 1268  |
| MSTRG. 26337. 2 | noncoding | -0. 0503808 | 0    | 21   | 565   |
| MSTRG. 26343. 1 | coding    | 0. 195      | 0    | 2568 | 2952  |
| MSTRG. 26344. 1 | noncoding | -0. 106496  | 7725 | 7770 | 10880 |
| MSTRG. 26345. 1 | noncoding | -0. 0004096 | 0    | 0    | 499   |
| MSTRG. 26345. 2 | noncoding | -0. 0126976 | 3801 | 3852 | 4968  |
| MSTRG. 26346. 1 | noncoding | -0. 004096  | 303  | 339  | 6128  |
| MSTRG. 26347. 1 | noncoding | -0. 045056  | 1869 | 1899 | 4033  |
| MSTRG. 26348. 1 | noncoding | -0. 049152  | 2649 | 2748 | 3108  |
| MSTRG. 26349. 1 | noncoding | -0. 028672  | 1365 | 1455 | 2223  |
| MSTRG. 26369. 3 | coding    | 0. 08       | 816  | 933  | 3240  |
| MSTRG. 26369. 2 | coding    | 0. 08       | 816  | 933  | 5484  |
| MSTRG. 26369. 4 | coding    | 0. 08       | 660  | 777  | 3084  |
| MSTRG. 26369. 5 | coding    | 0. 08       | 702  | 819  | 3124  |
| MSTRG. 26370. 2 | coding    | 0. 097      | 993  | 1530 | 1928  |
| MSTRG. 26373. 2 | coding    | 0. 149      | 0    | 1740 | 2225  |
| MSTRG. 26373. 3 | coding    | 0. 162      | 0    | 1548 | 1934  |
| MSTRG. 26374. 1 | coding    | 0. 125      | 207  | 1788 | 2953  |

|                  |           |             |      |      |       |
|------------------|-----------|-------------|------|------|-------|
| MSTRG. 26375. 1  | coding    | 0. 108      | 1374 | 1608 | 4161  |
| MSTRG. 26376. 1  | noncoding | -0. 065536  | 804  | 861  | 1015  |
| MSTRG. 26377. 1  | noncoding | -0. 0585728 | 219  | 237  | 1177  |
| MSTRG. 26374. 5  | noncoding | -0. 0933888 | 18   | 453  | 7315  |
| MSTRG. 26374. 6  | noncoding | -0. 0933888 | 18   | 453  | 4190  |
| MSTRG. 26374. 7  | noncoding | -0. 12288   | 861  | 939  | 6254  |
| MSTRG. 26374. 8  | noncoding | -0. 1073152 | 18   | 588  | 3885  |
| MSTRG. 26375. 2  | noncoding | -0. 090112  | 1074 | 1134 | 2554  |
| MSTRG. 26378. 2  | coding    | 0. 175      | 210  | 531  | 6230  |
| MSTRG. 26379. 7  | coding    | 0. 059      | 3642 | 7329 | 8244  |
| MSTRG. 26379. 6  | coding    | 0. 038      | 0    | 6924 | 8762  |
| MSTRG. 26379. 9  | coding    | 0. 058      | 3849 | 8556 | 9470  |
| MSTRG. 26386. 1  | noncoding | -0. 0679936 | 0    | 261  | 3775  |
| MSTRG. 26391. 2  | coding    | 0. 063      | 0    | 432  | 1948  |
| MSTRG. 26391. 3  | coding    | 0. 061      | 0    | 921  | 2194  |
| MSTRG. 26391. 4  | coding    | 0. 071      | 0    | 906  | 8553  |
| MSTRG. 26391. 5  | coding    | 0. 078      | 2991 | 3327 | 6652  |
| MSTRG. 26394. 3  | coding    | 0. 068      | 2733 | 4272 | 8019  |
| MSTRG. 26394. 4  | coding    | 0. 065      | 2742 | 4278 | 7898  |
| MSTRG. 26394. 5  | coding    | 0. 065      | 2721 | 4257 | 6297  |
| MSTRG. 26394. 8  | coding    | 0. 068      | 2829 | 4368 | 6397  |
| MSTRG. 26395. 1  | coding    | 0. 068      | 8817 | 9570 | 13016 |
| MSTRG. 26394. 10 | coding    | 0. 009      | 135  | 438  | 1681  |
| MSTRG. 26394. 9  | coding    | 0. 012      | 135  | 441  | 1684  |
| MSTRG. 26389. 1  | noncoding | -0. 073728  | 279  | 312  | 467   |
| MSTRG. 26428. 1  | coding    | 0. 167      | 3102 | 3405 | 4596  |
| MSTRG. 26428. 4  | noncoding | -0. 036864  | 2310 | 2376 | 3000  |
| MSTRG. 26433. 1  | coding    | 0. 068      | 1791 | 2346 | 7197  |
| MSTRG. 26434. 1  | noncoding | -0. 0172032 | 510  | 678  | 2738  |
| MSTRG. 26433. 2  | coding    | 0. 045      | 5193 | 5409 | 8570  |
| MSTRG. 26428. 7  | coding    | 0. 127      | 0    | 375  | 1453  |
| MSTRG. 26399. 8  | noncoding | -0. 0118784 | 417  | 570  | 867   |
| MSTRG. 26399. 7  | coding    | 0. 064      | 99   | 939  | 1235  |
| MSTRG. 26405. 1  | noncoding | -0. 09216   | 2265 | 2559 | 2714  |
| MSTRG. 26405. 2  | coding    | 0. 118      | 0    | 624  | 2821  |
| MSTRG. 26405. 5  | coding    | 0. 075      | 0    | 456  | 1461  |
| MSTRG. 26405. 4  | noncoding | -0. 1220608 | 0    | 162  | 1348  |
| MSTRG. 26405. 6  | noncoding | -0. 022528  | 1074 | 1221 | 1374  |
| MSTRG. 26411. 4  | coding    | 0. 18       | 1863 | 2268 | 3345  |
| MSTRG. 26411. 5  | coding    | 0. 087      | 321  | 3972 | 5026  |
| MSTRG. 26411. 3  | coding    | 0. 094      | 153  | 4149 | 5204  |
| MSTRG. 26412. 1  | noncoding | -0. 0004096 | 0    | 0    | 882   |
| MSTRG. 26413. 1  | noncoding | -0. 12288   | 798  | 855  | 2210  |
| MSTRG. 26415. 1  | noncoding | -0. 221184  | 186  | 234  | 701   |
| MSTRG. 26408. 1  | noncoding | -0. 0188416 | 1473 | 1563 | 1728  |
| MSTRG. 26439. 1  | coding    | 0. 23       | 0    | 729  | 2663  |
| MSTRG. 26448. 3  | noncoding | -0. 0557056 | 0    | 519  | 7988  |
| MSTRG. 26448. 1  | coding    | 0. 04       | 30   | 4944 | 9313  |
| MSTRG. 26448. 2  | coding    | 0. 042      | 39   | 3579 | 7948  |
| MSTRG. 26448. 5  | coding    | 0. 04       | 39   | 4953 | 9130  |
| MSTRG. 26448. 6  | coding    | 0. 136      | 0    | 519  | 5474  |
| MSTRG. 26448. 7  | noncoding | -0. 0401408 | 3    | 498  | 2807  |
| MSTRG. 26452. 3  | coding    | 0. 426      | 0    | 249  | 1883  |
| MSTRG. 26453. 1  | noncoding | -0. 065536  | 1785 | 1833 | 5024  |

|                  |           |             |       |       |       |
|------------------|-----------|-------------|-------|-------|-------|
| MSTRG. 26455. 1  | coding    | 0. 016      | 1239  | 1440  | 3176  |
| MSTRG. 26446. 4  | coding    | 0. 138      | 0     | 642   | 1044  |
| MSTRG. 26446. 5  | coding    | 0. 069      | 246   | 777   | 1180  |
| MSTRG. 26477. 1  | noncoding | -0. 34816   | 246   | 264   | 562   |
| MSTRG. 26491. 1  | noncoding | -0. 004096  | 7287  | 7431  | 13411 |
| MSTRG. 26493. 1  | noncoding | -0. 0065536 | 6078  | 6213  | 8540  |
| MSTRG. 26495. 1  | noncoding | -0. 0004096 | 0     | 0     | 570   |
| MSTRG. 26498. 1  | noncoding | -0. 0086016 | 480   | 627   | 2470  |
| MSTRG. 26498. 2  | coding    | 0. 149      | 831   | 1173  | 2910  |
| MSTRG. 26461. 4  | coding    | 0. 415      | 69    | 1032  | 6779  |
| MSTRG. 26461. 2  | coding    | 0. 299      | 69    | 1668  | 4952  |
| MSTRG. 26461. 3  | coding    | 0. 299      | 69    | 1668  | 4680  |
| MSTRG. 26461. 5  | coding    | 0. 292      | 66    | 1689  | 5441  |
| MSTRG. 26469. 2  | coding    | 0. 242      | 0     | 186   | 1226  |
| MSTRG. 26470. 2  | noncoding | -0. 0110592 | 0     | 333   | 950   |
| MSTRG. 26470. 3  | coding    | 0. 064      | 114   | 264   | 936   |
| MSTRG. 26470. 4  | noncoding | -0. 036864  | 51    | 150   | 943   |
| MSTRG. 26515. 1  | noncoding | -0. 0135168 | 54    | 69    | 542   |
| MSTRG. 26515. 2  | noncoding | -0. 0135168 | 54    | 69    | 495   |
| MSTRG. 26515. 3  | noncoding | -0. 04096   | 183   | 201   | 484   |
| MSTRG. 26521. 1  | noncoding | -0. 098304  | 0     | 81    | 238   |
| MSTRG. 26533. 1  | noncoding | -0. 0004096 | 0     | 0     | 1136  |
| MSTRG. 26541. 1  | noncoding | -0. 028672  | 33    | 171   | 449   |
| MSTRG. 26567. 1  | noncoding | -0. 0172032 | 333   | 339   | 669   |
| MSTRG. 26569. 2  | coding    | 0. 232      | 414   | 2475  | 2828  |
| MSTRG. 26569. 5  | coding    | 0. 225      | 414   | 2382  | 2735  |
| MSTRG. 26569. 6  | coding    | 0. 226      | 414   | 2331  | 2684  |
| MSTRG. 26569. 7  | coding    | 0. 231      | 414   | 2427  | 2780  |
| MSTRG. 26569. 8  | coding    | 0. 193      | 414   | 1995  | 2348  |
| MSTRG. 26569. 3  | coding    | 0. 177      | 435   | 2013  | 2368  |
| MSTRG. 26569. 4  | coding    | 0. 217      | 435   | 2208  | 2563  |
| MSTRG. 26569. 10 | coding    | 0. 231      | 417   | 2433  | 2762  |
| MSTRG. 26569. 11 | coding    | 0. 216      | 435   | 2352  | 2682  |
| MSTRG. 26569. 12 | coding    | 0. 2        | 435   | 2064  | 2394  |
| MSTRG. 26569. 9  | noncoding | -0. 1445888 | 372   | 1548  | 2682  |
| MSTRG. 26570. 1  | noncoding | -0. 016384  | 3195  | 3333  | 7061  |
| MSTRG. 26571. 1  | coding    | 0. 068      | 24858 | 25440 | 33450 |
| MSTRG. 26571. 2  | noncoding | -0. 0446464 | 9489  | 9684  | 14308 |
| MSTRG. 26573. 1  | coding    | 0. 044      | 7767  | 8697  | 10341 |
| MSTRG. 26574. 1  | noncoding | -0. 282624  | 663   | 714   | 2247  |
| MSTRG. 26574. 2  | noncoding | -0. 110592  | 1908  | 1983  | 5220  |
| MSTRG. 26571. 3  | coding    | 0. 107      | 12243 | 12576 | 18727 |
| MSTRG. 26572. 4  | noncoding | -0. 0299008 | 2790  | 2910  | 3130  |
| MSTRG. 26572. 5  | noncoding | -0. 06144   | 3027  | 3096  | 3284  |
| MSTRG. 26572. 6  | noncoding | -0. 047104  | 3318  | 3510  | 9534  |
| MSTRG. 26572. 7  | noncoding | -0. 0139264 | 1911  | 2070  | 2309  |
| MSTRG. 26572. 8  | noncoding | -0. 028672  | 969   | 1020  | 2007  |
| MSTRG. 26572. 9  | noncoding | -0. 0139264 | 822   | 981   | 1299  |
| MSTRG. 26572. 10 | noncoding | -0. 0237568 | 0     | 153   | 8995  |
| MSTRG. 26572. 11 | noncoding | -0. 028672  | 2886  | 2985  | 3965  |
| MSTRG. 26572. 12 | noncoding | -0. 0073728 | 867   | 1083  | 5635  |
| MSTRG. 26572. 13 | noncoding | -0. 0049152 | 468   | 612   | 1101  |
| MSTRG. 26572. 14 | coding    | 0. 081      | 357   | 735   | 891   |
| MSTRG. 26572. 15 | noncoding | -0. 036864  | 2424  | 2619  | 2886  |

|                  |           |             |       |       |       |
|------------------|-----------|-------------|-------|-------|-------|
| MSTRG. 26572. 16 | noncoding | -0. 036864  | 1968  | 2163  | 2430  |
| MSTRG. 26572. 17 | noncoding | -0. 114688  | 2328  | 2376  | 2618  |
| MSTRG. 26575. 1  | coding    | 0. 01       | 513   | 657   | 1122  |
| MSTRG. 26542. 4  | coding    | 0. 07       | 114   | 573   | 3006  |
| MSTRG. 26542. 3  | coding    | 0. 07       | 114   | 573   | 3111  |
| MSTRG. 26542. 6  | noncoding | -0. 0004096 | 1218  | 1356  | 2986  |
| MSTRG. 26552. 3  | coding    | 0. 164      | 1125  | 3687  | 6140  |
| MSTRG. 26552. 5  | coding    | 0. 203      | 207   | 2637  | 5089  |
| MSTRG. 26553. 2  | coding    | 0. 269      | 1200  | 3204  | 3978  |
| MSTRG. 26553. 1  | coding    | 0. 269      | 693   | 2697  | 5365  |
| MSTRG. 26554. 2  | coding    | 0. 176      | 3063  | 7563  | 15592 |
| MSTRG. 26554. 1  | coding    | 0. 175      | 633   | 5109  | 13137 |
| MSTRG. 26554. 4  | coding    | 0. 171      | 0     | 4605  | 10289 |
| MSTRG. 26554. 3  | coding    | 0. 168      | 537   | 5133  | 10817 |
| MSTRG. 26554. 5  | coding    | 0. 172      | 990   | 4224  | 9845  |
| MSTRG. 26555. 3  | coding    | 0. 378      | 0     | 9240  | 10721 |
| MSTRG. 26557. 2  | coding    | 0. 288      | 867   | 4383  | 5570  |
| MSTRG. 26546. 1  | coding    | 0. 292      | 651   | 2778  | 3161  |
| MSTRG. 26547. 1  | noncoding | -0. 100352  | 2193  | 2637  | 2801  |
| MSTRG. 26547. 2  | coding    | 0. 172      | 0     | 402   | 1189  |
| MSTRG. 26548. 3  | coding    | 0. 237      | 51    | 1560  | 2002  |
| MSTRG. 26548. 5  | coding    | 0. 26       | 0     | 1515  | 1961  |
| MSTRG. 26560. 1  | coding    | 0. 034      | 408   | 1920  | 3969  |
| MSTRG. 26563. 1  | coding    | 0. 538      | 0     | 6369  | 7566  |
| MSTRG. 26586. 3  | coding    | 0. 123      | 132   | 3204  | 3880  |
| MSTRG. 26593. 1  | noncoding | -0. 012288  | 2058  | 2193  | 3523  |
| MSTRG. 26585. 2  | noncoding | -0. 0004096 | 381   | 525   | 3641  |
| MSTRG. 26594. 3  | coding    | 0. 311      | 81    | 1416  | 2292  |
| MSTRG. 26595. 1  | coding    | 0. 11       | 363   | 5817  | 8872  |
| MSTRG. 26596. 1  | noncoding | -0. 057344  | 576   | 630   | 2139  |
| MSTRG. 26598. 1  | coding    | 0. 16       | 420   | 753   | 5320  |
| MSTRG. 26602. 2  | coding    | 0. 395      | 111   | 3690  | 4051  |
| MSTRG. 26602. 3  | coding    | 0. 441      | 24    | 3234  | 3595  |
| MSTRG. 26601. 2  | coding    | 0. 367      | 9     | 1266  | 1916  |
| MSTRG. 26611. 2  | noncoding | -0. 043008  | 3357  | 3528  | 3685  |
| MSTRG. 26614. 1  | coding    | 0. 127      | 1146  | 1302  | 2622  |
| MSTRG. 26615. 1  | noncoding | -0. 0262144 | 9     | 63    | 507   |
| MSTRG. 26615. 2  | noncoding | -0. 0262144 | 24    | 78    | 352   |
| MSTRG. 26616. 1  | noncoding | -0. 0884736 | 9     | 273   | 630   |
| MSTRG. 26616. 2  | noncoding | -0. 1114112 | 0     | 126   | 659   |
| MSTRG. 26617. 2  | coding    | 0. 235      | 39    | 852   | 1034  |
| MSTRG. 26617. 3  | coding    | 0. 233      | 10854 | 11850 | 12032 |
| MSTRG. 26617. 4  | coding    | 0. 233      | 1920  | 2916  | 3096  |
| MSTRG. 26620. 4  | noncoding | -0. 0864256 | 0     | 294   | 588   |
| MSTRG. 26624. 4  | coding    | 0. 289      | 0     | 2784  | 2951  |
| MSTRG. 26623. 3  | coding    | 0. 306      | 0     | 528   | 796   |
| MSTRG. 26630. 3  | coding    | 0. 361      | 0     | 324   | 2431  |
| MSTRG. 26630. 2  | coding    | 0. 35       | 0     | 345   | 5018  |
| MSTRG. 26630. 4  | coding    | 0. 35       | 0     | 345   | 4532  |
| MSTRG. 26636. 2  | noncoding | -0. 323584  | 4236  | 4266  | 6429  |
| MSTRG. 26637. 4  | coding    | 0. 365      | 0     | 3048  | 10247 |
| MSTRG. 26637. 5  | coding    | 0. 379      | 294   | 2805  | 3446  |
| MSTRG. 26644. 1  | coding    | 0. 504      | 0     | 2955  | 5081  |
| MSTRG. 26645. 1  | noncoding | -0. 0258048 | 1896  | 2130  | 3179  |

|                  |           |             |      |      |       |
|------------------|-----------|-------------|------|------|-------|
| MSTRG. 26644. 2  | coding    | 0. 504      | 0    | 2955 | 5081  |
| MSTRG. 26644. 5  | coding    | 0. 517      | 0    | 2811 | 10489 |
| MSTRG. 26642. 1  | coding    | 0. 371      | 51   | 372  | 942   |
| MSTRG. 26643. 1  | noncoding | -0. 0626688 | 309  | 468  | 3302  |
| MSTRG. 26646. 1  | coding    | 0. 289      | 0    | 315  | 1512  |
| MSTRG. 26647. 1  | noncoding | -0. 0274432 | 372  | 846  | 1053  |
| MSTRG. 26647. 2  | coding    | 0. 434      | 0    | 369  | 1120  |
| MSTRG. 26651. 1  | noncoding | -0. 012288  | 270  | 354  | 512   |
| MSTRG. 26652. 1  | coding    | 0. 064      | 1584 | 2388 | 7735  |
| MSTRG. 26657. 2  | coding    | 0. 165      | 270  | 630  | 2391  |
| MSTRG. 26658. 2  | coding    | 0. 136      | 327  | 642  | 2534  |
| MSTRG. 26660. 2  | coding    | 0. 181      | 3435 | 3813 | 5979  |
| MSTRG. 26660. 1  | coding    | 0. 181      | 510  | 888  | 3056  |
| MSTRG. 26660. 8  | coding    | 0. 181      | 492  | 870  | 2773  |
| MSTRG. 26660. 6  | coding    | 0. 091      | 1083 | 1815 | 2622  |
| MSTRG. 26660. 10 | coding    | 0. 181      | 1095 | 1473 | 3368  |
| MSTRG. 26660. 11 | noncoding | -0. 012288  | 2400 | 2529 | 4747  |
| MSTRG. 26660. 12 | coding    | 0. 181      | 1098 | 1476 | 10064 |
| MSTRG. 26665. 1  | noncoding | -0. 0651264 | 1503 | 1845 | 2000  |
| MSTRG. 26662. 1  | noncoding | -0. 016384  | 9    | 108  | 464   |
| MSTRG. 26667. 1  | noncoding | -0. 004096  | 288  | 363  | 604   |
| MSTRG. 26668. 1  | noncoding | -0. 086016  | 36   | 114  | 553   |
| MSTRG. 26671. 1  | noncoding | -0. 0233472 | 360  | 579  | 871   |
| MSTRG. 26675. 2  | coding    | 0. 342      | 225  | 1950 | 2951  |
| MSTRG. 26675. 6  | coding    | 0. 342      | 291  | 2016 | 3007  |
| MSTRG. 26675. 7  | coding    | 0. 388      | 1089 | 1830 | 2822  |
| MSTRG. 26675. 5  | coding    | 0. 338      | 9    | 1917 | 2908  |
| MSTRG. 26675. 8  | coding    | 0. 388      | 1455 | 2196 | 2778  |
| MSTRG. 26675. 11 | coding    | 0. 21       | 534  | 1338 | 1880  |
| MSTRG. 26675. 12 | coding    | 0. 195      | 174  | 891  | 7139  |
| MSTRG. 26677. 2  | noncoding | -0. 014336  | 3447 | 3603 | 8769  |
| MSTRG. 26677. 1  | noncoding | -0. 012288  | 339  | 375  | 888   |
| MSTRG. 26680. 2  | coding    | 0. 229      | 0    | 1683 | 2512  |
| MSTRG. 26684. 1  | coding    | 0. 319      | 0    | 1875 | 2340  |
| MSTRG. 26684. 2  | coding    | 0. 378      | 2202 | 3462 | 3926  |
| MSTRG. 26684. 4  | coding    | 0. 412      | 1941 | 3168 | 3633  |
| MSTRG. 26684. 6  | coding    | 0. 38       | 405  | 1758 | 2223  |
| MSTRG. 26685. 3  | coding    | 0. 758      | 0    | 741  | 6828  |
| MSTRG. 26685. 2  | coding    | 0. 738      | 0    | 813  | 6100  |
| MSTRG. 26686. 1  | coding    | 0. 593      | 426  | 1239 | 2589  |
| MSTRG. 26688. 1  | noncoding | -0. 0520192 | 822  | 1359 | 1573  |
| MSTRG. 26707. 1  | noncoding | -0. 0299008 | 0    | 30   | 291   |
| MSTRG. 26709. 1  | noncoding | -0. 0733184 | 0    | 396  | 737   |
| MSTRG. 26710. 1  | coding    | 0. 201      | 708  | 1815 | 2046  |
| MSTRG. 26710. 3  | coding    | 0. 157      | 0    | 1608 | 1839  |
| MSTRG. 26710. 11 | coding    | 0. 201      | 414  | 1521 | 1751  |
| MSTRG. 26710. 12 | coding    | 0. 197      | 426  | 1905 | 2061  |
| MSTRG. 26711. 1  | noncoding | -0. 028672  | 624  | 762  | 1567  |
| MSTRG. 26708. 1  | noncoding | -0. 024576  | 183  | 651  | 1562  |
| MSTRG. 26715. 1  | noncoding | -0. 0913408 | 474  | 1200 | 1488  |
| MSTRG. 26715. 2  | coding    | 0. 223      | 144  | 870  | 2068  |
| MSTRG. 26715. 3  | coding    | 0. 223      | 144  | 870  | 1650  |
| MSTRG. 26715. 4  | coding    | 0. 146      | 75   | 1221 | 1546  |
| MSTRG. 26715. 7  | noncoding | -0. 0913408 | 360  | 1086 | 1378  |

|                  |           |             |      |      |       |
|------------------|-----------|-------------|------|------|-------|
| MSTRG. 26715. 8  | coding    | 0. 223      | 351  | 1077 | 1370  |
| MSTRG. 26715. 9  | noncoding | -0. 1028096 | 504  | 891  | 1184  |
| MSTRG. 26720. 2  | coding    | 0. 461      | 477  | 1323 | 2280  |
| MSTRG. 26720. 5  | coding    | 0. 442      | 1644 | 2739 | 3617  |
| MSTRG. 26720. 6  | noncoding | -0. 0004096 | 2286 | 2454 | 5043  |
| MSTRG. 26720. 7  | coding    | 0. 436      | 1257 | 2421 | 3182  |
| MSTRG. 26712. 4  | coding    | 0. 419      | 0    | 789  | 1156  |
| MSTRG. 26712. 3  | coding    | 0. 232      | 33   | 828  | 1604  |
| MSTRG. 26712. 2  | coding    | 0. 248      | 42   | 870  | 1872  |
| MSTRG. 26713. 1  | noncoding | -0. 0434176 | 102  | 273  | 1712  |
| MSTRG. 26722. 2  | noncoding | -0. 1236992 | 0    | 558  | 5158  |
| MSTRG. 26722. 3  | coding    | 0. 213      | 1092 | 3180 | 3959  |
| MSTRG. 26722. 4  | coding    | 0. 186      | 468  | 1311 | 2091  |
| MSTRG. 26725. 5  | coding    | 0. 389      | 0    | 3822 | 6552  |
| MSTRG. 26725. 6  | coding    | 0. 375      | 0    | 4566 | 5600  |
| MSTRG. 26725. 8  | coding    | 0. 36       | 735  | 4782 | 7473  |
| MSTRG. 26726. 2  | coding    | 0. 558      | 402  | 1290 | 4979  |
| MSTRG. 26726. 1  | coding    | 0. 281      | 213  | 474  | 761   |
| MSTRG. 26727. 1  | noncoding | -0. 0004096 | 2601 | 2844 | 3312  |
| MSTRG. 26727. 2  | noncoding | -0. 0774144 | 0    | 1050 | 2825  |
| MSTRG. 26727. 4  | coding    | 0. 239      | 186  | 2517 | 4725  |
| MSTRG. 26727. 3  | coding    | 0. 239      | 189  | 2520 | 6225  |
| MSTRG. 26727. 5  | coding    | 0. 28       | 0    | 1794 | 5053  |
| MSTRG. 26728. 1  | noncoding | -0. 02048   | 1797 | 1887 | 7643  |
| MSTRG. 26728. 2  | noncoding | -0. 0200704 | 6951 | 7116 | 13009 |
| MSTRG. 26729. 1  | coding    | 0. 023      | 2523 | 3108 | 4199  |
| MSTRG. 26739. 3  | coding    | 0. 363      | 186  | 1827 | 5892  |
| MSTRG. 26739. 4  | coding    | 0. 496      | 2550 | 7572 | 8374  |
| MSTRG. 26739. 5  | coding    | 0. 496      | 579  | 5601 | 6385  |
| MSTRG. 26741. 1  | noncoding | -0. 053248  | 2739 | 2850 | 3175  |
| MSTRG. 26744. 1  | coding    | 0. 579      | 111  | 2118 | 3671  |
| MSTRG. 26744. 4  | coding    | 0. 507      | 18   | 2472 | 4193  |
| MSTRG. 26742. 2  | coding    | 0. 71       | 0    | 606  | 1350  |
| MSTRG. 26742. 3  | coding    | 0. 578      | 99   | 840  | 1564  |
| MSTRG. 26748. 1  | noncoding | -0. 0774144 | 0    | 684  | 6922  |
| MSTRG. 26749. 1  | coding    | 0. 156      | 525  | 1743 | 2172  |
| MSTRG. 26749. 2  | coding    | 0. 157      | 411  | 1671 | 2322  |
| MSTRG. 26751. 1  | coding    | 0. 175      | 0    | 2559 | 3083  |
| MSTRG. 26751. 4  | noncoding | -0. 1695744 | 0    | 84   | 599   |
| MSTRG. 26751. 6  | noncoding | -0. 026624  | 849  | 1032 | 3999  |
| MSTRG. 26751. 5  | coding    | 0. 126      | 0    | 1845 | 6493  |
| MSTRG. 26751. 7  | coding    | 0. 168      | 0    | 2211 | 2733  |
| MSTRG. 26751. 3  | coding    | 0. 173      | 0    | 2229 | 2753  |
| MSTRG. 26751. 8  | noncoding | -0. 065536  | 5562 | 5631 | 7139  |
| MSTRG. 26753. 1  | noncoding | -0. 0053248 | 2412 | 2502 | 9522  |
| MSTRG. 26751. 9  | coding    | 0. 142      | 4302 | 5727 | 9230  |
| MSTRG. 26754. 1  | coding    | 0. 029      | 873  | 1041 | 3635  |
| MSTRG. 26757. 2  | coding    | 0. 607      | 213  | 1473 | 1724  |
| MSTRG. 26773. 20 | noncoding | -0. 047104  | 51   | 933  | 2750  |
| MSTRG. 26774. 2  | coding    | 0. 378      | 729  | 1920 | 2517  |
| MSTRG. 26776. 1  | noncoding | -0. 0999424 | 0    | 606  | 1291  |
| MSTRG. 26777. 2  | coding    | 0. 423      | 645  | 3837 | 4830  |
| MSTRG. 26777. 3  | coding    | 0. 436      | 150  | 3231 | 4222  |
| MSTRG. 26765. 1  | noncoding | -0. 0770048 | 45   | 228  | 383   |

|                 |           |             |      |       |       |
|-----------------|-----------|-------------|------|-------|-------|
| MSTRG. 26770. 1 | noncoding | -0. 0487424 | 84   | 948   | 1206  |
| MSTRG. 26770. 2 | noncoding | -0. 0413696 | 0    | 972   | 1289  |
| MSTRG. 26790. 1 | coding    | 0. 562      | 822  | 2322  | 2479  |
| MSTRG. 26790. 3 | coding    | 0. 549      | 0    | 3897  | 4705  |
| MSTRG. 26788. 2 | coding    | 0. 289      | 24   | 441   | 649   |
| MSTRG. 26786. 1 | coding    | 0. 075      | 1440 | 1803  | 2795  |
| MSTRG. 26792. 3 | coding    | 0. 43       | 0    | 6198  | 6502  |
| MSTRG. 26792. 4 | coding    | 0. 434      | 0    | 6072  | 6376  |
| MSTRG. 26793. 2 | coding    | 0. 713      | 192  | 11454 | 11611 |
| MSTRG. 26793. 3 | coding    | 0. 715      | 0    | 11415 | 11569 |
| MSTRG. 26795. 2 | noncoding | -0. 0876544 | 0    | 549   | 1252  |
| MSTRG. 26795. 3 | noncoding | -0. 0815104 | 0    | 678   | 1381  |
| MSTRG. 26796. 1 | coding    | 0. 328      | 1059 | 2151  | 3648  |
| MSTRG. 26796. 2 | coding    | 0. 441      | 0    | 918   | 2195  |
| MSTRG. 26796. 3 | coding    | 0. 361      | 78   | 945   | 2100  |
| MSTRG. 26798. 2 | coding    | 0. 386      | 0    | 786   | 7218  |
| MSTRG. 26803. 3 | coding    | 0. 586      | 0    | 2610  | 5115  |
| MSTRG. 26804. 1 | noncoding | -0. 024576  | 96   | 1017  | 1397  |
| MSTRG. 26805. 1 | noncoding | -0. 0724992 | 63   | 795   | 949   |
| MSTRG. 26806. 7 | noncoding | -0. 0978944 | 1440 | 1932  | 2089  |
| MSTRG. 26806. 8 | noncoding | -0. 1056768 | 1440 | 1716  | 2130  |
| MSTRG. 26806. 4 | noncoding | -0. 0856064 | 0    | 336   | 1916  |
| MSTRG. 26806. 5 | noncoding | -0. 06144   | 6873 | 8688  | 8957  |
| MSTRG. 26808. 1 | noncoding | -0. 1056768 | 0    | 711   | 1283  |
| MSTRG. 26808. 2 | coding    | 0. 29       | 0    | 804   | 1375  |
| MSTRG. 26821. 1 | coding    | 0. 234      | 822  | 1089  | 3340  |
| MSTRG. 26821. 3 | coding    | 0. 22       | 252  | 522   | 824   |
| MSTRG. 26821. 4 | coding    | 0. 193      | 798  | 1059  | 1362  |
| MSTRG. 26821. 5 | coding    | 0. 224      | 1002 | 1227  | 1531  |
| MSTRG. 26821. 6 | coding    | 0. 109      | 57   | 528   | 831   |
| MSTRG. 26830. 1 | noncoding | -0. 0892928 | 2274 | 2592  | 2762  |
| MSTRG. 26830. 2 | noncoding | -0. 0892928 | 1377 | 1695  | 1895  |
| MSTRG. 26830. 3 | noncoding | -0. 0303104 | 3600 | 3765  | 3920  |
| MSTRG. 26828. 2 | coding    | 0. 322      | 0    | 3699  | 10021 |
| MSTRG. 26835. 2 | noncoding | -0. 045056  | 285  | 372   | 612   |
| MSTRG. 26836. 2 | coding    | 0. 15       | 1956 | 3492  | 4066  |
| MSTRG. 26836. 3 | noncoding | -0. 0012288 | 762  | 906   | 1061  |
| MSTRG. 26837. 2 | coding    | 0. 206      | 0    | 1440  | 7391  |
| MSTRG. 26837. 4 | coding    | 0. 135      | 0    | 3420  | 4305  |
| MSTRG. 26837. 5 | coding    | 0. 149      | 762  | 2127  | 2530  |
| MSTRG. 26841. 1 | noncoding | -0. 069632  | 870  | 960   | 2359  |
| MSTRG. 26843. 2 | coding    | 0. 154      | 15   | 924   | 5441  |
| MSTRG. 26844. 1 | coding    | 0. 028      | 117  | 588   | 872   |
| MSTRG. 26845. 1 | noncoding | -0. 0090112 | 1530 | 1602  | 2105  |
| MSTRG. 26853. 1 | coding    | 0. 048      | 3729 | 4500  | 5206  |
| MSTRG. 26838. 1 | noncoding | -0. 0585728 | 441  | 618   | 891   |
| MSTRG. 26855. 1 | noncoding | -0. 0319488 | 96   | 246   | 635   |
| MSTRG. 26856. 1 | noncoding | -0. 06144   | 141  | 231   | 561   |
| MSTRG. 26863. 4 | coding    | 0. 153      | 732  | 1143  | 1795  |
| MSTRG. 26863. 5 | coding    | 0. 152      | 702  | 1968  | 7534  |
| MSTRG. 26864. 1 | noncoding | -0. 024576  | 72   | 132   | 2875  |
| MSTRG. 26865. 1 | noncoding | -0. 0425984 | 2742 | 3015  | 6081  |
| MSTRG. 26866. 1 | noncoding | -0. 008192  | 477  | 606   | 2174  |
| MSTRG. 26867. 1 | noncoding | -0. 004096  | 3570 | 3777  | 5904  |

|                  |           |             |      |      |       |
|------------------|-----------|-------------|------|------|-------|
| MSTRG. 26868. 1  | noncoding | -0. 0004096 | 792  | 936  | 2593  |
| MSTRG. 26868. 2  | noncoding | -0. 0004096 | 885  | 1029 | 16993 |
| MSTRG. 26868. 3  | noncoding | -0. 0008192 | 4740 | 4830 | 7457  |
| MSTRG. 26870. 1  | noncoding | -0. 090112  | 837  | 882  | 1038  |
| MSTRG. 26858. 1  | noncoding | -0. 0372736 | 0    | 9    | 236   |
| MSTRG. 26861. 1  | noncoding | -0. 0086016 | 138  | 288  | 469   |
| MSTRG. 26861. 2  | noncoding | -0. 024576  | 549  | 678  | 832   |
| MSTRG. 26889. 8  | coding    | 0. 492      | 1236 | 2238 | 3603  |
| MSTRG. 26889. 9  | coding    | 0. 504      | 438  | 1680 | 3044  |
| MSTRG. 26889. 4  | coding    | 0. 522      | 96   | 1254 | 2618  |
| MSTRG. 26889. 7  | coding    | 0. 421      | 12   | 1503 | 2869  |
| MSTRG. 26889. 6  | coding    | 0. 418      | 78   | 2082 | 3448  |
| MSTRG. 26889. 5  | coding    | 0. 504      | 4431 | 5673 | 7039  |
| MSTRG. 26889. 3  | coding    | 0. 418      | 4146 | 6156 | 7520  |
| MSTRG. 26889. 2  | coding    | 0. 465      | 2652 | 3990 | 5356  |
| MSTRG. 26889. 10 | noncoding | -0. 0507904 | 891  | 1122 | 1278  |
| MSTRG. 26889. 11 | noncoding | -0. 0544768 | 891  | 1320 | 1574  |
| MSTRG. 26890. 1  | noncoding | -0. 0282624 | 108  | 198  | 794   |
| MSTRG. 26889. 12 | coding    | 0. 228      | 78   | 924  | 2361  |
| MSTRG. 26891. 1  | coding    | 0. 049      | 192  | 360  | 11176 |
| MSTRG. 26892. 1  | coding    | 0. 094      | 666  | 948  | 1256  |
| MSTRG. 26894. 1  | noncoding | -0. 0581632 | 3756 | 4035 | 4400  |
| MSTRG. 26879. 2  | coding    | 0. 494      | 15   | 813  | 3704  |
| MSTRG. 26879. 3  | coding    | 0. 403      | 1377 | 1758 | 4626  |
| MSTRG. 26880. 2  | noncoding | -0. 1826816 | 0    | 318  | 10402 |
| MSTRG. 26898. 1  | noncoding | -0. 0167936 | 1422 | 1584 | 2319  |
| MSTRG. 26903. 2  | coding    | 0. 136      | 0    | 2199 | 2460  |
| MSTRG. 26904. 1  | coding    | 0. 044      | 186  | 396  | 733   |
| MSTRG. 26902. 1  | coding    | 0. 565      | 1122 | 3867 | 4022  |
| MSTRG. 26910. 3  | coding    | 0. 342      | 12   | 372  | 918   |
| MSTRG. 26910. 4  | coding    | 0. 311      | 147  | 483  | 1357  |
| MSTRG. 26910. 5  | coding    | 0. 342      | 15   | 375  | 920   |
| MSTRG. 26919. 8  | coding    | 0. 127      | 759  | 2754 | 5194  |
| MSTRG. 26919. 5  | coding    | 0. 127      | 2388 | 4944 | 7384  |
| MSTRG. 26919. 1  | coding    | 0. 121      | 0    | 4359 | 6800  |
| MSTRG. 26919. 2  | coding    | 0. 12       | 0    | 4362 | 6803  |
| MSTRG. 26919. 3  | coding    | 0. 116      | 0    | 4251 | 6692  |
| MSTRG. 26919. 7  | coding    | 0. 12       | 0    | 4362 | 6500  |
| MSTRG. 26919. 9  | coding    | 0. 12       | 0    | 4425 | 6680  |
| MSTRG. 26919. 10 | coding    | 0. 113      | 0    | 4137 | 6360  |
| MSTRG. 26920. 1  | coding    | 0. 046      | 225  | 381  | 1263  |
| MSTRG. 26932. 1  | coding    | 0. 299      | 0    | 1473 | 2056  |
| MSTRG. 26932. 4  | coding    | 0. 296      | 0    | 1251 | 2425  |
| MSTRG. 26932. 5  | coding    | 0. 327      | 270  | 1446 | 2619  |
| MSTRG. 26932. 7  | coding    | 0. 381      | 855  | 2028 | 3203  |
| MSTRG. 26932. 6  | coding    | 0. 332      | 852  | 1923 | 3030  |
| MSTRG. 26932. 8  | coding    | 0. 332      | 513  | 1584 | 2229  |
| MSTRG. 26932. 9  | coding    | 0. 357      | 516  | 1515 | 2684  |
| MSTRG. 26932. 10 | coding    | 0. 369      | 75   | 903  | 2101  |
| MSTRG. 26933. 3  | coding    | 0. 266      | 102  | 2253 | 2508  |
| MSTRG. 26937. 2  | coding    | 0. 392      | 177  | 9072 | 10567 |
| MSTRG. 26937. 5  | coding    | 0. 389      | 198  | 9297 | 10584 |
| MSTRG. 26929. 1  | coding    | 0. 405      | 267  | 2628 | 3108  |
| MSTRG. 26929. 2  | coding    | 0. 373      | 0    | 2871 | 3435  |



|                  |           |             |      |      |       |
|------------------|-----------|-------------|------|------|-------|
| MSTRG. 26930. 1  | noncoding | -0. 077824  | 738  | 771  | 1055  |
| MSTRG. 26941. 9  | coding    | 0. 184      | 0    | 1320 | 1849  |
| MSTRG. 26941. 8  | coding    | 0. 19       | 0    | 6849 | 7469  |
| MSTRG. 26941. 10 | coding    | 0. 189      | 0    | 6921 | 7628  |
| MSTRG. 26941. 11 | coding    | 0. 189      | 0    | 6945 | 7565  |
| MSTRG. 26941. 13 | coding    | 0. 189      | 966  | 7458 | 8164  |
| MSTRG. 26941. 14 | coding    | 0. 168      | 723  | 1626 | 2065  |
| MSTRG. 26941. 15 | noncoding | -0. 0004096 | 645  | 816  | 2945  |
| MSTRG. 26942. 1  | coding    | 0. 319      | 0    | 1050 | 5669  |
| MSTRG. 26943. 1  | noncoding | -0. 0352256 | 3525 | 3996 | 7969  |
| MSTRG. 26942. 3  | coding    | 0. 398      | 1299 | 1830 | 4697  |
| MSTRG. 26945. 1  | coding    | 0. 512      | 0    | 2241 | 3118  |
| MSTRG. 26944. 11 | coding    | 0. 354      | 1161 | 1830 | 2269  |
| MSTRG. 26953. 3  | coding    | 0. 175      | 0    | 597  | 3517  |
| MSTRG. 26953. 2  | coding    | 0. 049      | 6075 | 7389 | 10041 |
| MSTRG. 26954. 1  | noncoding | -0. 090112  | 546  | 552  | 2264  |
| MSTRG. 26955. 2  | coding    | 0. 213      | 1245 | 2874 | 3033  |
| MSTRG. 26955. 1  | coding    | 0. 231      | 1245 | 3096 | 3351  |
| MSTRG. 26955. 3  | coding    | 0. 209      | 531  | 1563 | 1817  |
| MSTRG. 26955. 5  | coding    | 0. 223      | 138  | 1896 | 2049  |
| MSTRG. 26957. 1  | noncoding | -0. 069632  | 3912 | 4410 | 9652  |
| MSTRG. 26962. 1  | noncoding | -0. 086016  | 156  | 177  | 331   |
| MSTRG. 26974. 1  | coding    | 0. 461      | 78   | 3972 | 4316  |
| MSTRG. 26988. 1  | coding    | 0. 072      | 4734 | 4953 | 9158  |
| MSTRG. 26988. 2  | noncoding | -0. 032768  | 885  | 963  | 1126  |
| MSTRG. 26990. 1  | coding    | 0. 258      | 0    | 1083 | 4178  |
| MSTRG. 26990. 2  | coding    | 0. 228      | 2088 | 3051 | 4062  |
| MSTRG. 26990. 3  | coding    | 0. 213      | 324  | 1527 | 4117  |
| MSTRG. 26994. 1  | noncoding | -0. 0446464 | 465  | 666  | 3115  |
| MSTRG. 26990. 4  | coding    | 0. 23       | 102  | 1389 | 5581  |
| MSTRG. 26990. 6  | coding    | 0. 119      | 93   | 303  | 779   |
| MSTRG. 26990. 5  | coding    | 0. 23       | 333  | 1620 | 4722  |
| MSTRG. 26997. 1  | coding    | 0. 166      | 0    | 1002 | 1156  |
| MSTRG. 26998. 1  | noncoding | -0. 0458752 | 24   | 333  | 488   |
| MSTRG. 27003. 4  | coding    | 0. 195      | 0    | 1233 | 3064  |
| MSTRG. 27006. 6  | coding    | 0. 238      | 252  | 897  | 1098  |
| MSTRG. 27006. 8  | coding    | 0. 238      | 147  | 795  | 995   |
| MSTRG. 27006. 9  | coding    | 0. 25       | 219  | 873  | 1073  |
| MSTRG. 27006. 7  | coding    | 0. 229      | 228  | 948  | 1148  |
| MSTRG. 27006. 5  | coding    | 0. 21       | 81   | 1398 | 1600  |
| MSTRG. 27006. 4  | coding    | 0. 199      | 78   | 1536 | 1738  |
| MSTRG. 27006. 2  | coding    | 0. 135      | 126  | 4221 | 4422  |
| MSTRG. 27007. 1  | noncoding | -0. 043008  | 336  | 576  | 1886  |
| MSTRG. 27008. 1  | noncoding | -0. 0339968 | 417  | 528  | 884   |
| MSTRG. 27011. 1  | noncoding | -0. 0004096 | 0    | 0    | 727   |
| MSTRG. 27002. 4  | coding    | 0. 474      | 0    | 2478 | 5211  |
| MSTRG. 27014. 1  | noncoding | -0. 07168   | 3102 | 3507 | 3662  |
| MSTRG. 27017. 6  | noncoding | -0. 0258048 | 4338 | 4554 | 7266  |
| MSTRG. 27017. 5  | noncoding | -0. 012288  | 2841 | 2952 | 3106  |
| MSTRG. 27017. 7  | coding    | 0. 411      | 1458 | 1926 | 6089  |
| MSTRG. 27018. 1  | noncoding | -0. 0274432 | 2904 | 3105 | 3262  |
| MSTRG. 27017. 9  | coding    | 0. 107      | 2385 | 3897 | 6875  |
| MSTRG. 27017. 10 | noncoding | -0. 196608  | 1695 | 1722 | 2286  |
| MSTRG. 27017. 11 | noncoding | -0. 196608  | 1626 | 1653 | 2127  |

|                |           |            |      |      |       |
|----------------|-----------|------------|------|------|-------|
| MSTRG.27012.3  | coding    | 0.521      | 273  | 2499 | 5673  |
| MSTRG.27012.2  | coding    | 0.542      | 273  | 2613 | 5794  |
| MSTRG.27019.2  | coding    | 0.277      | 0    | 555  | 711   |
| MSTRG.27021.2  | noncoding | -0.008192  | 204  | 348  | 1125  |
| MSTRG.27023.1  | noncoding | -0.04096   | 1941 | 2376 | 2530  |
| MSTRG.27027.1  | noncoding | -0.1196032 | 0    | 72   | 460   |
| MSTRG.27027.2  | noncoding | -0.1441792 | 0    | 60   | 361   |
| MSTRG.27029.1  | noncoding | -0.004096  | 120  | 243  | 400   |
| MSTRG.27031.2  | coding    | 0.528      | 0    | 1959 | 2498  |
| MSTRG.27035.4  | noncoding | -0.034816  | 0    | 237  | 797   |
| MSTRG.27035.6  | noncoding | -0.0466944 | 0    | 474  | 1279  |
| MSTRG.27035.3  | coding    | 0.222      | 702  | 2670 | 3025  |
| MSTRG.27035.5  | coding    | 0.187      | 0    | 2457 | 2810  |
| MSTRG.27035.7  | noncoding | -0.0151552 | 1614 | 1755 | 2186  |
| MSTRG.27038.2  | coding    | 0.106      | 549  | 1275 | 2264  |
| MSTRG.27038.3  | coding    | 0.118      | 768  | 1038 | 2028  |
| MSTRG.27038.4  | coding    | 0.118      | 621  | 891  | 1879  |
| MSTRG.27038.5  | coding    | 0.136      | 792  | 1119 | 2109  |
| MSTRG.27039.1  | noncoding | -0.0356352 | 255  | 456  | 744   |
| MSTRG.27039.2  | noncoding | -0.016384  | 372  | 480  | 634   |
| MSTRG.27069.1  | noncoding | -0.0356352 | 2163 | 2316 | 3125  |
| MSTRG.27069.2  | coding    | 0.046      | 9591 | 9888 | 12338 |
| MSTRG.27069.3  | noncoding | -0.0356352 | 2838 | 2991 | 3801  |
| MSTRG.27042.2  | coding    | 0.053      | 603  | 1494 | 3301  |
| MSTRG.27043.1  | coding    | 0.198      | 630  | 1065 | 1407  |
| MSTRG.27045.4  | coding    | 0.079      | 303  | 1638 | 7059  |
| MSTRG.27045.5  | coding    | 0.084      | 0    | 1407 | 5385  |
| MSTRG.27045.6  | coding    | 0.079      | 216  | 1554 | 3909  |
| MSTRG.27045.7  | coding    | 0.078      | 183  | 1524 | 3576  |
| MSTRG.27045.8  | coding    | 0.081      | 468  | 1989 | 3097  |
| MSTRG.27073.2  | coding    | 0.172      | 0    | 4065 | 4762  |
| MSTRG.27073.5  | coding    | 0.204      | 1824 | 4782 | 5480  |
| MSTRG.27073.6  | coding    | 0.204      | 2676 | 5634 | 6330  |
| MSTRG.27073.7  | coding    | 0.173      | 420  | 4044 | 4486  |
| MSTRG.27073.8  | coding    | 0.191      | 1200 | 3834 | 4818  |
| MSTRG.27073.9  | coding    | 0.208      | 138  | 3072 | 3514  |
| MSTRG.27051.1  | noncoding | -0.0790528 | 0    | 123  | 419   |
| MSTRG.27078.1  | noncoding | -0.088064  | 534  | 1104 | 1398  |
| MSTRG.27083.2  | noncoding | -0.0602112 | 0    | 132  | 1285  |
| MSTRG.27083.3  | noncoding | -0.0659456 | 0    | 177  | 1271  |
| MSTRG.27085.4  | coding    | 0.144      | 585  | 4485 | 4875  |
| MSTRG.27086.2  | coding    | 0.126      | 45   | 909  | 1412  |
| MSTRG.27098.1  | coding    | 0.329      | 342  | 1062 | 1523  |
| MSTRG.27098.2  | coding    | 0.335      | 177  | 903  | 1344  |
| MSTRG.27098.3  | coding    | 0.346      | 195  | 948  | 1389  |
| MSTRG.27099.1  | noncoding | -0.028672  | 321  | 489  | 685   |
| MSTRG.27099.2  | noncoding | -0.045056  | 321  | 417  | 571   |
| MSTRG.27101.3  | coding    | 0.328      | 336  | 1893 | 3406  |
| MSTRG.27101.2  | coding    | 0.404      | 435  | 2973 | 3655  |
| MSTRG.27101.1  | coding    | 0.444      | 2631 | 4545 | 4991  |
| MSTRG.27101.4  | coding    | 0.403      | 414  | 2961 | 3338  |
| MSTRG.27101.5  | coding    | 0.442      | 2781 | 4710 | 5057  |
| MSTRG.27101.10 | coding    | 0.459      | 966  | 2259 | 2569  |
| MSTRG.27101.11 | coding    | 0.353      | 0    | 2283 | 2843  |

|                  |           |             |      |      |       |
|------------------|-----------|-------------|------|------|-------|
| MSTRG. 27101. 12 | coding    | 0. 444      | 0    | 2274 | 2834  |
| MSTRG. 27101. 8  | coding    | 0. 378      | 0    | 1293 | 2591  |
| MSTRG. 27101. 14 | coding    | 0. 342      | 2574 | 4536 | 4877  |
| MSTRG. 27101. 16 | coding    | 0. 402      | 414  | 2976 | 3275  |
| MSTRG. 27103. 1  | noncoding | -0. 0053248 | 0    | 234  | 388   |
| MSTRG. 27104. 1  | coding    | 0. 484      | 783  | 2094 | 2474  |
| MSTRG. 27104. 2  | coding    | 0. 484      | 654  | 1965 | 2345  |
| MSTRG. 27104. 3  | coding    | 0. 484      | 978  | 2289 | 2665  |
| MSTRG. 27104. 4  | coding    | 0. 484      | 924  | 2229 | 2607  |
| MSTRG. 27104. 5  | coding    | 0. 484      | 1992 | 3297 | 3682  |
| MSTRG. 27104. 6  | coding    | 0. 484      | 960  | 2271 | 2655  |
| MSTRG. 27101. 17 | coding    | 0. 287      | 702  | 1230 | 2177  |
| MSTRG. 27091. 2  | coding    | 0. 328      | 177  | 1074 | 1386  |
| MSTRG. 27092. 1  | noncoding | -0. 0671744 | 1308 | 1557 | 1714  |
| MSTRG. 27092. 2  | noncoding | -0. 0536576 | 3309 | 4449 | 4639  |
| MSTRG. 27092. 3  | noncoding | -0. 073728  | 1269 | 1479 | 1646  |
| MSTRG. 27092. 4  | noncoding | -0. 067584  | 1257 | 1545 | 2467  |
| MSTRG. 27092. 5  | noncoding | -0. 0663552 | 0    | 273  | 10772 |
| MSTRG. 27092. 6  | noncoding | -0. 0663552 | 0    | 273  | 1754  |
| MSTRG. 27094. 1  | noncoding | -0. 0700416 | 156  | 360  | 603   |
| MSTRG. 27092. 7  | noncoding | -0. 012288  | 5955 | 6084 | 6301  |
| MSTRG. 27114. 1  | coding    | 0. 117      | 780  | 4890 | 7032  |
| MSTRG. 27118. 1  | coding    | 0. 078      | 1395 | 2061 | 2218  |
| MSTRG. 27118. 2  | noncoding | -0. 028672  | 405  | 471  | 1548  |
| MSTRG. 27119. 1  | noncoding | -0. 0421888 | 7602 | 7773 | 28383 |
| MSTRG. 27119. 2  | noncoding | -0. 0110592 | 3057 | 3177 | 10814 |
| MSTRG. 27118. 3  | coding    | 0. 093      | 1083 | 1740 | 2603  |
| MSTRG. 27118. 4  | coding    | 0. 093      | 1053 | 1710 | 28225 |
| MSTRG. 27123. 1  | noncoding | -0. 0466944 | 1578 | 1980 | 2253  |
| MSTRG. 27124. 2  | coding    | 0. 492      | 660  | 2223 | 3816  |
| MSTRG. 27124. 5  | noncoding | -0. 0114688 | 3621 | 3795 | 5672  |
| MSTRG. 27125. 1  | noncoding | -0. 0385024 | 462  | 666  | 7874  |
| MSTRG. 27124. 6  | coding    | 0. 439      | 1434 | 3924 | 8970  |
| MSTRG. 27124. 7  | noncoding | -0. 0536576 | 1542 | 1821 | 2288  |
| MSTRG. 27106. 1  | coding    | 0. 062      | 5493 | 5943 | 6759  |
| MSTRG. 27109. 1  | coding    | 0. 25       | 1077 | 2193 | 3750  |
| MSTRG. 27129. 1  | noncoding | -0. 0806912 | 45   | 51   | 593   |
| MSTRG. 27143. 1  | noncoding | -0. 155648  | 21   | 45   | 288   |
| MSTRG. 27144. 1  | noncoding | -0. 4096    | 297  | 324  | 1862  |
| MSTRG. 27150. 1  | noncoding | -0. 0417792 | 2985 | 4227 | 13749 |
| MSTRG. 27156. 1  | noncoding | -0. 053248  | 387  | 645  | 802   |
| MSTRG. 27157. 2  | noncoding | -0. 0724992 | 1245 | 1473 | 1628  |
| MSTRG. 27179. 1  | noncoding | -0. 0360448 | 0    | 102  | 2263  |
| MSTRG. 27191. 1  | coding    | 0. 245      | 612  | 1230 | 2636  |
| MSTRG. 27192. 1  | coding    | 0. 097      | 150  | 810  | 6349  |
| MSTRG. 27192. 3  | coding    | 0. 155      | 1188 | 2289 | 2724  |
| MSTRG. 27192. 2  | coding    | 0. 155      | 138  | 1239 | 2330  |
| MSTRG. 27194. 1  | noncoding | -0. 0073728 | 399  | 543  | 992   |
| MSTRG. 27198. 1  | coding    | 0. 079      | 198  | 1212 | 1462  |
| MSTRG. 27202. 5  | coding    | 0. 112      | 1023 | 4347 | 7854  |
| MSTRG. 27217. 1  | noncoding | -0. 073728  | 2154 | 2223 | 2791  |
| MSTRG. 27217. 2  | noncoding | -0. 12288   | 0    | 180  | 2658  |
| MSTRG. 27212. 1  | noncoding | -0. 090112  | 81   | 135  | 950   |
| MSTRG. 27221. 2  | coding    | 0. 595      | 0    | 798  | 8526  |

|                  |           |             |       |       |       |
|------------------|-----------|-------------|-------|-------|-------|
| MSTRG. 27222. 1  | noncoding | -0. 0442368 | 4233  | 4437  | 7667  |
| MSTRG. 27223. 1  | noncoding | -0. 032768  | 237   | 516   | 1958  |
| MSTRG. 27226. 1  | coding    | 0. 076      | 0     | 1188  | 3178  |
| MSTRG. 27226. 4  | coding    | 0. 111      | 549   | 1167  | 1536  |
| MSTRG. 27226. 5  | coding    | 0. 064      | 0     | 1611  | 1970  |
| MSTRG. 27230. 2  | coding    | 0. 282      | 0     | 540   | 1130  |
| MSTRG. 27230. 4  | noncoding | -0. 069632  | 249   | 306   | 848   |
| MSTRG. 27230. 9  | noncoding | -0. 053248  | 42    | 528   | 17853 |
| MSTRG. 27230. 16 | noncoding | -0. 002048  | 3759  | 3879  | 10102 |
| MSTRG. 27230. 17 | noncoding | -0. 045056  | 2172  | 2271  | 3250  |
| MSTRG. 27239. 1  | noncoding | -0. 0462848 | 1734  | 2052  | 8164  |
| MSTRG. 27239. 2  | noncoding | -0. 0253952 | 123   | 156   | 1976  |
| MSTRG. 27282. 1  | noncoding | -0. 0851968 | 1377  | 1572  | 2577  |
| MSTRG. 27282. 3  | noncoding | -0. 0851968 | 5409  | 5604  | 6533  |
| MSTRG. 27282. 11 | noncoding | -0. 024576  | 792   | 918   | 7752  |
| MSTRG. 27282. 10 | noncoding | -0. 0512    | 5103  | 5304  | 15051 |
| MSTRG. 27282. 12 | noncoding | -0. 012288  | 5250  | 5367  | 7715  |
| MSTRG. 27282. 14 | coding    | 0. 082      | 1317  | 1590  | 5520  |
| MSTRG. 27282. 15 | noncoding | -0. 0749568 | 1998  | 2154  | 7631  |
| MSTRG. 27285. 1  | coding    | 0. 096      | 18096 | 19005 | 25719 |
| MSTRG. 27282. 16 | noncoding | -0. 0323584 | 738   | 861   | 1301  |
| MSTRG. 27282. 20 | coding    | 0. 453      | 0     | 96    | 2124  |
| MSTRG. 27282. 21 | noncoding | -0. 126976  | 2760  | 3282  | 7448  |
| MSTRG. 27282. 18 | noncoding | -0. 157696  | 2475  | 3627  | 6457  |
| MSTRG. 27288. 1  | noncoding | -0. 0487424 | 0     | 267   | 1262  |
| MSTRG. 27291. 1  | coding    | 0. 199      | 1005  | 2412  | 3885  |
| MSTRG. 27291. 2  | noncoding | -0. 0663552 | 1431  | 1821  | 2177  |
| MSTRG. 27292. 1  | noncoding | -0. 032768  | 366   | 489   | 3200  |
| MSTRG. 27293. 1  | noncoding | -0. 0077824 | 474   | 477   | 1339  |
| MSTRG. 27291. 7  | coding    | 0. 45       | 2103  | 2514  | 2669  |
| MSTRG. 27291. 8  | coding    | 0. 437      | 2103  | 2499  | 2654  |
| MSTRG. 27247. 3  | coding    | 0. 15       | 123   | 414   | 975   |
| MSTRG. 27247. 2  | coding    | 0. 193      | 15    | 336   | 899   |
| MSTRG. 27248. 1  | coding    | 0. 035      | 897   | 1239  | 1421  |
| MSTRG. 27250. 1  | noncoding | -0. 016384  | 1338  | 1416  | 3336  |
| MSTRG. 27251. 1  | coding    | 0. 089      | 165   | 1635  | 2096  |
| MSTRG. 27255. 2  | coding    | 0. 217      | 825   | 1932  | 3016  |
| MSTRG. 27256. 1  | noncoding | -0. 0192512 | 393   | 489   | 1233  |
| MSTRG. 27263. 1  | noncoding | -0. 1323008 | 0     | 189   | 1574  |
| MSTRG. 27264. 1  | noncoding | -0. 045056  | 1929  | 2016  | 3442  |
| MSTRG. 27263. 2  | noncoding | -0. 004096  | 528   | 600   | 1435  |
| MSTRG. 27263. 3  | coding    | 0. 449      | 210   | 3144  | 4661  |
| MSTRG. 27268. 1  | noncoding | -0. 0045056 | 2460  | 2676  | 4142  |
| MSTRG. 27272. 1  | noncoding | -0. 0004096 | 426   | 480   | 2533  |
| MSTRG. 27276. 1  | noncoding | -0. 03072   | 2331  | 2457  | 5461  |
| MSTRG. 27275. 2  | noncoding | -0. 0454656 | 30    | 279   | 6367  |
| MSTRG. 27304. 3  | coding    | 0. 273      | 573   | 885   | 4010  |
| MSTRG. 27305. 1  | noncoding | -0. 0004096 | 44361 | 44484 | 57734 |
| MSTRG. 27305. 2  | noncoding | -0. 036864  | 1548  | 1737  | 16087 |
| MSTRG. 27305. 3  | noncoding | -0. 0086016 | 7017  | 7068  | 9143  |
| MSTRG. 27305. 4  | noncoding | -0. 0086016 | 6408  | 6459  | 8536  |
| MSTRG. 27305. 5  | noncoding | -0. 004096  | 5997  | 6210  | 32178 |
| MSTRG. 27305. 6  | noncoding | -0. 004096  | 5793  | 6006  | 6409  |
| MSTRG. 27304. 6  | noncoding | -0. 065536  | 2256  | 2364  | 6100  |

|                  |           |             |       |       |       |
|------------------|-----------|-------------|-------|-------|-------|
| MSTRG. 27304. 7  | noncoding | -0. 0192512 | 6555  | 6726  | 17641 |
| MSTRG. 27304. 8  | noncoding | -0. 008192  | 16287 | 16479 | 20421 |
| MSTRG. 27304. 9  | noncoding | -0. 008192  | 7485  | 7677  | 20171 |
| MSTRG. 27304. 10 | coding    | 0. 27       | 1440  | 5508  | 8477  |
| MSTRG. 27304. 11 | coding    | 0. 268      | 13701 | 17787 | 20758 |
| MSTRG. 27304. 12 | noncoding | -0. 032768  | 2598  | 2703  | 5233  |
| MSTRG. 27307. 1  | noncoding | -0. 069632  | 4944  | 4986  | 6486  |
| MSTRG. 27304. 13 | noncoding | -0. 114688  | 4767  | 4845  | 7729  |
| MSTRG. 27308. 1  | noncoding | -0. 0385024 | 3024  | 3207  | 10288 |
| MSTRG. 27308. 2  | noncoding | -0. 0385024 | 4752  | 4935  | 5677  |
| MSTRG. 27304. 14 | noncoding | -0. 016384  | 1488  | 1596  | 1955  |
| MSTRG. 27309. 1  | noncoding | -0. 0004096 | 4077  | 4260  | 8059  |
| MSTRG. 27309. 2  | noncoding | -0. 0004096 | 5763  | 5946  | 8394  |
| MSTRG. 27310. 1  | noncoding | -0. 073728  | 759   | 762   | 915   |
| MSTRG. 27311. 1  | noncoding | -0. 0339968 | 228   | 390   | 692   |
| MSTRG. 27277. 1  | noncoding | -0. 090112  | 24    | 114   | 873   |
| MSTRG. 27278. 1  | noncoding | -0. 0438272 | 276   | 522   | 3276  |
| MSTRG. 27300. 3  | coding    | 0. 128      | 5373  | 8001  | 9520  |
| MSTRG. 27300. 4  | coding    | 0. 119      | 0     | 4422  | 4749  |
| MSTRG. 27300. 5  | coding    | 0. 423      | 5940  | 8358  | 8515  |
| MSTRG. 27302. 1  | noncoding | -0. 0192512 | 231   | 393   | 3268  |
| MSTRG. 27303. 5  | noncoding | -0. 0294912 | 3378  | 3582  | 10722 |
| MSTRG. 27312. 1  | coding    | 0. 273      | 237   | 1179  | 1436  |
| MSTRG. 27314. 2  | coding    | 0. 149      | 114   | 2622  | 4999  |
| MSTRG. 27314. 3  | noncoding | -0. 0114688 | 123   | 159   | 400   |
| MSTRG. 27329. 1  | noncoding | -0. 0380928 | 8832  | 9039  | 16212 |
| MSTRG. 27329. 2  | noncoding | -0. 0126976 | 2793  | 3057  | 4998  |
| MSTRG. 27328. 4  | noncoding | -0. 0667648 | 234   | 903   | 2138  |
| MSTRG. 27330. 1  | noncoding | -0. 0188416 | 3252  | 3405  | 7332  |
| MSTRG. 27368. 2  | noncoding | -0. 024576  | 321   | 438   | 594   |
| MSTRG. 27368. 3  | noncoding | -0. 004096  | 57    | 372   | 526   |
| MSTRG. 27368. 4  | coding    | 0. 082      | 5898  | 6513  | 20866 |
| MSTRG. 27368. 5  | coding    | 0. 175      | 1029  | 1473  | 1842  |
| MSTRG. 27368. 6  | noncoding | -0. 0032768 | 11574 | 11697 | 14287 |
| MSTRG. 27370. 1  | noncoding | -0. 135168  | 2655  | 2718  | 5241  |
| MSTRG. 27368. 7  | noncoding | -0. 028672  | 2739  | 2865  | 12502 |
| MSTRG. 27373. 1  | coding    | 0. 066      | 9585  | 9789  | 12296 |
| MSTRG. 27337. 1  | noncoding | -0. 06144   | 153   | 228   | 869   |
| MSTRG. 27338. 3  | coding    | 0. 104      | 0     | 2091  | 2631  |
| MSTRG. 27338. 4  | coding    | 0. 11       | 693   | 2349  | 2888  |
| MSTRG. 27339. 1  | noncoding | -0. 581632  | 1497  | 1503  | 2449  |
| MSTRG. 27340. 1  | coding    | 0. 171      | 7137  | 7356  | 8953  |
| MSTRG. 27343. 3  | noncoding | -0. 1912832 | 4386  | 4827  | 7466  |
| MSTRG. 27343. 4  | coding    | 0. 454      | 4203  | 4755  | 7393  |
| MSTRG. 27343. 6  | noncoding | -0. 1880064 | 507   | 933   | 2961  |
| MSTRG. 27343. 8  | noncoding | -0. 1855488 | 6339  | 6822  | 8850  |
| MSTRG. 27359. 4  | coding    | 0. 187      | 882   | 1650  | 2280  |
| MSTRG. 27362. 3  | coding    | 0. 229      | 1764  | 3159  | 3626  |
| MSTRG. 27391. 4  | coding    | 0. 175      | 1071  | 1998  | 4063  |
| MSTRG. 27391. 2  | coding    | 0. 172      | 588   | 1638  | 3705  |
| MSTRG. 27391. 7  | coding    | 0. 148      | 156   | 2256  | 4094  |
| MSTRG. 27391. 8  | coding    | 0. 202      | 201   | 1224  | 3061  |
| MSTRG. 27391. 10 | coding    | 0. 152      | 81    | 2130  | 2457  |
| MSTRG. 27391. 9  | coding    | 0. 165      | 1281  | 3570  | 3897  |

|                  |           |             |      |       |       |
|------------------|-----------|-------------|------|-------|-------|
| MSTRG. 27393. 3  | coding    | 0. 546      | 0    | 276   | 2074  |
| MSTRG. 27393. 4  | coding    | 0. 052      | 561  | 816   | 3085  |
| MSTRG. 27400. 3  | coding    | 0. 06       | 1452 | 10560 | 10824 |
| MSTRG. 27400. 4  | coding    | 0. 027      | 345  | 3540  | 3804  |
| MSTRG. 27401. 1  | coding    | 0. 109      | 0    | 1548  | 2447  |
| MSTRG. 27401. 2  | coding    | 0. 109      | 0    | 1548  | 3599  |
| MSTRG. 27401. 3  | coding    | 0. 109      | 0    | 1548  | 3028  |
| MSTRG. 27401. 4  | coding    | 0. 081      | 57   | 1545  | 6109  |
| MSTRG. 27404. 1  | noncoding | -0. 0466944 | 909  | 1122  | 1277  |
| MSTRG. 27411. 2  | noncoding | -0. 032768  | 144  | 456   | 8317  |
| MSTRG. 27412. 1  | noncoding | -0. 0045056 | 1359 | 1497  | 1784  |
| MSTRG. 27411. 3  | coding    | 0. 239      | 138  | 1740  | 3199  |
| MSTRG. 27413. 1  | noncoding | -0. 0135168 | 1644 | 2193  | 5844  |
| MSTRG. 27413. 2  | noncoding | -0. 0380928 | 2634 | 2910  | 12636 |
| MSTRG. 27413. 3  | noncoding | -0. 0380928 | 4470 | 4746  | 12713 |
| MSTRG. 27411. 5  | coding    | 0. 24       | 1734 | 3087  | 4547  |
| MSTRG. 27378. 6  | coding    | 0. 224      | 0    | 447   | 973   |
| MSTRG. 27378. 7  | coding    | 0. 087      | 1347 | 3048  | 4668  |
| MSTRG. 27378. 8  | coding    | 0. 057      | 3324 | 5040  | 8056  |
| MSTRG. 27378. 9  | coding    | 0. 065      | 1335 | 1749  | 4764  |
| MSTRG. 27387. 1  | noncoding | -0. 045056  | 36   | 153   | 665   |
| MSTRG. 27387. 2  | noncoding | -0. 045056  | 36   | 153   | 502   |
| MSTRG. 27387. 3  | noncoding | -0. 016384  | 0    | 39    | 610   |
| MSTRG. 27387. 4  | noncoding | -0. 028672  | 0    | 42    | 261   |
| MSTRG. 27387. 5  | noncoding | -0. 016384  | 0    | 39    | 259   |
| MSTRG. 27387. 6  | noncoding | -0. 016384  | 0    | 39    | 264   |
| MSTRG. 27387. 7  | coding    | 0. 061      | 114  | 462   | 946   |
| MSTRG. 27387. 8  | coding    | 0. 061      | 96   | 444   | 826   |
| MSTRG. 27387. 9  | noncoding | -0. 016384  | 0    | 39    | 261   |
| MSTRG. 27387. 10 | noncoding | -0. 016384  | 0    | 39    | 259   |
| MSTRG. 27387. 11 | noncoding | -0. 016384  | 0    | 39    | 364   |
| MSTRG. 27420. 1  | coding    | 0. 169      | 0    | 564   | 1431  |
| MSTRG. 27420. 2  | coding    | 0. 319      | 0    | 1992  | 3726  |
| MSTRG. 27431. 1  | noncoding | -0. 110592  | 84   | 90    | 326   |
| MSTRG. 27435. 3  | coding    | 0. 27       | 321  | 4275  | 9905  |
| MSTRG. 27436. 1  | noncoding | -0. 0487424 | 2469 | 2616  | 2773  |
| MSTRG. 27440. 1  | noncoding | -0. 0663552 | 39   | 45    | 343   |
| MSTRG. 27427. 9  | coding    | 0. 382      | 309  | 2247  | 2432  |
| MSTRG. 27427. 8  | coding    | 0. 425      | 0    | 2454  | 2641  |
| MSTRG. 27427. 7  | coding    | 0. 409      | 114  | 2394  | 2579  |
| MSTRG. 27427. 10 | coding    | 0. 379      | 552  | 2523  | 2687  |
| MSTRG. 27427. 11 | coding    | 0. 378      | 426  | 2355  | 2509  |
| MSTRG. 27427. 12 | coding    | 0. 403      | 153  | 2331  | 2485  |
| MSTRG. 27427. 13 | coding    | 0. 433      | 141  | 2148  | 2441  |
| MSTRG. 27428. 2  | noncoding | -0. 0438272 | 237  | 486   | 1166  |
| MSTRG. 27428. 1  | noncoding | -0. 02048   | 114  | 279   | 912   |
| MSTRG. 27428. 3  | noncoding | -0. 0507904 | 261  | 567   | 771   |
| MSTRG. 27428. 4  | noncoding | -0. 0004096 | 552  | 675   | 1004  |
| MSTRG. 27445. 2  | noncoding | -0. 0729088 | 0    | 864   | 1778  |
| MSTRG. 27446. 1  | noncoding | -0. 086016  | 195  | 201   | 1135  |
| MSTRG. 27449. 1  | coding    | 0. 021      | 3891 | 4053  | 5388  |
| MSTRG. 27454. 3  | coding    | 0. 121      | 612  | 2754  | 4230  |
| MSTRG. 27454. 2  | coding    | 0. 121      | 540  | 2682  | 4424  |
| MSTRG. 27459. 1  | noncoding | -0. 1130496 | 138  | 1017  | 1556  |

|                  |           |             |      |       |       |
|------------------|-----------|-------------|------|-------|-------|
| MSTRG. 27459. 2  | noncoding | -0. 1191936 | 0    | 345   | 968   |
| MSTRG. 27458. 8  | coding    | 0. 137      | 5154 | 6063  | 6626  |
| MSTRG. 27461. 1  | coding    | 0. 188      | 0    | 4896  | 7612  |
| MSTRG. 27461. 3  | coding    | 0. 188      | 273  | 4863  | 7580  |
| MSTRG. 27461. 5  | coding    | 0. 189      | 3225 | 8136  | 10853 |
| MSTRG. 27461. 6  | coding    | 0. 186      | 3225 | 7971  | 10688 |
| MSTRG. 27461. 7  | coding    | 0. 193      | 1623 | 6117  | 8833  |
| MSTRG. 27461. 10 | coding    | 0. 189      | 6    | 4947  | 7664  |
| MSTRG. 27461. 11 | coding    | 0. 184      | 18   | 4713  | 7430  |
| MSTRG. 27462. 1  | noncoding | -0. 0688128 | 30   | 417   | 599   |
| MSTRG. 27462. 2  | noncoding | -0. 0557056 | 30   | 375   | 583   |
| MSTRG. 27462. 3  | noncoding | -0. 0565248 | 3    | 366   | 1701  |
| MSTRG. 27457. 3  | coding    | 0. 395      | 276  | 7833  | 8009  |
| MSTRG. 27474. 4  | coding    | 0. 497      | 1899 | 6366  | 7045  |
| MSTRG. 27474. 2  | coding    | 0. 548      | 5052 | 8091  | 8770  |
| MSTRG. 27474. 6  | coding    | 0. 548      | 6480 | 9519  | 10199 |
| MSTRG. 27475. 1  | coding    | 0. 482      | 0    | 564   | 799   |
| MSTRG. 27479. 1  | coding    | 0. 447      | 0    | 2286  | 3429  |
| MSTRG. 27480. 2  | coding    | 0. 588      | 783  | 13488 | 13645 |
| MSTRG. 27480. 1  | coding    | 0. 588      | 999  | 13704 | 13861 |
| MSTRG. 27480. 4  | coding    | 0. 589      | 999  | 13245 | 13401 |
| MSTRG. 27480. 5  | coding    | 0. 528      | 78   | 2109  | 2748  |
| MSTRG. 27480. 6  | coding    | 0. 588      | 567  | 13269 | 13425 |
| MSTRG. 27480. 8  | coding    | 0. 592      | 177  | 5580  | 5737  |
| MSTRG. 27480. 9  | coding    | 0. 588      | 915  | 8298  | 9693  |
| MSTRG. 27480. 7  | coding    | 0. 556      | 273  | 13776 | 13932 |
| MSTRG. 27480. 10 | coding    | 0. 437      | 102  | 1632  | 2154  |
| MSTRG. 27480. 12 | coding    | 0. 437      | 252  | 1782  | 2301  |
| MSTRG. 27463. 1  | noncoding | -0. 016384  | 21   | 87    | 314   |
| MSTRG. 27466. 2  | coding    | 0. 335      | 345  | 1743  | 2421  |
| MSTRG. 27466. 3  | coding    | 0. 348      | 0    | 1311  | 1986  |
| MSTRG. 27466. 4  | coding    | 0. 359      | 648  | 1830  | 2502  |
| MSTRG. 27467. 2  | coding    | 0. 495      | 0    | 1143  | 1607  |
| MSTRG. 27469. 3  | coding    | 0. 313      | 696  | 2574  | 2835  |
| MSTRG. 27471. 2  | coding    | 0. 363      | 0    | 1158  | 1340  |
| MSTRG. 27471. 6  | coding    | 0. 352      | 0    | 864   | 2137  |
| MSTRG. 27473. 1  | noncoding | -0. 049152  | 291  | 348   | 701   |
| MSTRG. 27471. 7  | coding    | 0. 227      | 246  | 624   | 1330  |
| MSTRG. 27471. 8  | noncoding | -0. 0589824 | 4929 | 5478  | 8675  |
| MSTRG. 27486. 2  | coding    | 0. 343      | 261  | 723   | 946   |
| MSTRG. 27486. 3  | coding    | 0. 343      | 360  | 822   | 1044  |
| MSTRG. 27487. 2  | coding    | 0. 361      | 0    | 2271  | 2459  |
| MSTRG. 27489. 4  | coding    | 0. 331      | 459  | 1857  | 2383  |
| MSTRG. 27489. 5  | coding    | 0. 352      | 927  | 2043  | 2856  |
| MSTRG. 27489. 6  | noncoding | -0. 0253952 | 6    | 243   | 1081  |
| MSTRG. 27489. 7  | coding    | 0. 372      | 390  | 1416  | 2127  |
| MSTRG. 27483. 1  | coding    | 0. 261      | 405  | 1089  | 1550  |
| MSTRG. 27507. 2  | noncoding | -0. 0557056 | 3696 | 4056  | 4269  |
| MSTRG. 27507. 3  | coding    | 0. 136      | 1221 | 1581  | 1792  |
| MSTRG. 27507. 4  | coding    | 0. 136      | 978  | 1338  | 1549  |
| MSTRG. 27507. 5  | coding    | 0. 136      | 1197 | 1557  | 1769  |
| MSTRG. 27507. 7  | noncoding | -0. 0557056 | 1881 | 2241  | 2452  |
| MSTRG. 27507. 8  | coding    | 0. 148      | 81   | 540   | 1212  |
| MSTRG. 27508. 1  | noncoding | -0. 1024    | 0    | 426   | 702   |

|                  |           |             |       |       |       |
|------------------|-----------|-------------|-------|-------|-------|
| MSTRG. 27510. 1  | coding    | 0. 338      | 5466  | 9483  | 12576 |
| MSTRG. 27512. 12 | coding    | 0. 39       | 93    | 747   | 1129  |
| MSTRG. 27510. 3  | coding    | 0. 338      | 1437  | 5454  | 5621  |
| MSTRG. 27510. 4  | coding    | 0. 33       | 2313  | 6714  | 7896  |
| MSTRG. 27510. 5  | coding    | 0. 322      | 2967  | 7314  | 7482  |
| MSTRG. 27510. 6  | noncoding | -0. 0262144 | 495   | 645   | 2779  |
| MSTRG. 27514. 1  | coding    | 0. 265      | 339   | 4869  | 5371  |
| MSTRG. 27514. 2  | coding    | 0. 265      | 711   | 5241  | 5743  |
| MSTRG. 27515. 1  | noncoding | -0. 0208896 | 93    | 252   | 904   |
| MSTRG. 27521. 1  | coding    | 0. 36       | 0     | 6252  | 8781  |
| MSTRG. 27521. 2  | coding    | 0. 368      | 231   | 6150  | 8676  |
| MSTRG. 27521. 3  | coding    | 0. 367      | 504   | 6318  | 8808  |
| MSTRG. 27524. 2  | coding    | 0. 413      | 618   | 1929  | 3311  |
| MSTRG. 27526. 1  | coding    | 0. 274      | 597   | 1620  | 2324  |
| MSTRG. 27526. 4  | coding    | 0. 299      | 729   | 1464  | 1946  |
| MSTRG. 27497. 1  | coding    | 0. 498      | 0     | 1326  | 1630  |
| MSTRG. 27499. 2  | coding    | 0. 319      | 111   | 1425  | 1939  |
| MSTRG. 27499. 4  | coding    | 0. 309      | 369   | 1740  | 3618  |
| MSTRG. 27505. 1  | coding    | 0. 17       | 354   | 3537  | 4184  |
| MSTRG. 27505. 5  | coding    | 0. 12       | 2889  | 3228  | 9971  |
| MSTRG. 27502. 1  | coding    | 0. 293      | 0     | 2934  | 3090  |
| MSTRG. 27533. 4  | coding    | 0. 522      | 261   | 1650  | 1843  |
| MSTRG. 27540. 1  | noncoding | -0. 0483328 | 165   | 342   | 3171  |
| MSTRG. 27572. 2  | coding    | 0. 302      | 0     | 573   | 1881  |
| MSTRG. 27573. 4  | noncoding | -0. 0884736 | 0     | 225   | 1644  |
| MSTRG. 27573. 3  | noncoding | -0. 0790528 | 0     | 312   | 2289  |
| MSTRG. 27573. 2  | noncoding | -0. 1138688 | 0     | 525   | 1789  |
| MSTRG. 27580. 6  | coding    | 0. 134      | 840   | 1971  | 2637  |
| MSTRG. 27580. 7  | coding    | 0. 135      | 303   | 1428  | 2094  |
| MSTRG. 27580. 8  | coding    | 0. 134      | 639   | 1770  | 2437  |
| MSTRG. 27580. 5  | coding    | 0. 134      | 462   | 1593  | 2259  |
| MSTRG. 27580. 9  | coding    | 0. 083      | 2481  | 2673  | 7065  |
| MSTRG. 27581. 3  | coding    | 0. 28       | 15324 | 16731 | 17085 |
| MSTRG. 27581. 6  | noncoding | -0. 1081344 | 729   | 1191  | 3461  |
| MSTRG. 27581. 5  | coding    | 0. 28       | 11388 | 12795 | 13149 |
| MSTRG. 27584. 1  | coding    | 0. 436      | 0     | 4203  | 4358  |
| MSTRG. 27584. 10 | coding    | 0. 44       | 0     | 4257  | 4587  |
| MSTRG. 27584. 11 | coding    | 0. 425      | 0     | 4488  | 4818  |
| MSTRG. 27584. 9  | coding    | 0. 438      | 0     | 4227  | 5467  |
| MSTRG. 27584. 12 | coding    | 0. 441      | 0     | 4161  | 7281  |
| MSTRG. 27584. 13 | coding    | 0. 433      | 0     | 4401  | 4731  |
| MSTRG. 27584. 14 | coding    | 0. 45       | 195   | 4296  | 4627  |
| MSTRG. 27584. 15 | coding    | 0. 449      | 9     | 4155  | 4487  |
| MSTRG. 27587. 3  | coding    | 0. 502      | 0     | 258   | 644   |
| MSTRG. 27587. 2  | coding    | 0. 302      | 783   | 1671  | 1945  |
| MSTRG. 27588. 4  | coding    | 0. 325      | 0     | 1554  | 1748  |
| MSTRG. 27589. 2  | coding    | 0. 373      | 0     | 3948  | 4229  |
| MSTRG. 27589. 4  | coding    | 0. 433      | 0     | 1632  | 1889  |
| MSTRG. 27590. 5  | coding    | 0. 313      | 363   | 1719  | 2132  |
| MSTRG. 27541. 1  | noncoding | -0. 0475136 | 90    | 387   | 1086  |
| MSTRG. 27541. 2  | noncoding | -0. 0135168 | 0     | 144   | 1252  |
| MSTRG. 27544. 2  | coding    | 0. 346      | 0     | 1215  | 1371  |
| MSTRG. 27544. 3  | coding    | 0. 336      | 14598 | 15801 | 15977 |
| MSTRG. 27547. 1  | coding    | 0. 416      | 0     | 7242  | 11928 |



|                  |           |             |       |       |       |
|------------------|-----------|-------------|-------|-------|-------|
| MSTRG. 27548. 2  | coding    | 0. 41       | 321   | 2553  | 2911  |
| MSTRG. 27550. 1  | noncoding | -0. 0069632 | 81    | 114   | 354   |
| MSTRG. 27554. 1  | noncoding | -0. 0098304 | 135   | 387   | 1651  |
| MSTRG. 27555. 1  | noncoding | -0. 006144  | 84    | 324   | 729   |
| MSTRG. 27555. 2  | noncoding | -0. 1183744 | 0     | 168   | 598   |
| MSTRG. 27555. 3  | noncoding | -0. 1183744 | 0     | 168   | 532   |
| MSTRG. 27556. 1  | coding    | 0. 31       | 630   | 1167  | 2223  |
| MSTRG. 27557. 1  | coding    | 0. 175      | 0     | 2976  | 3711  |
| MSTRG. 27558. 2  | coding    | 0. 446      | 0     | 6471  | 7161  |
| MSTRG. 27559. 4  | coding    | 0. 242      | 96    | 492   | 998   |
| MSTRG. 27559. 5  | coding    | 0. 264      | 246   | 618   | 1125  |
| MSTRG. 27560. 1  | noncoding | -0. 0794624 | 459   | 792   | 1016  |
| MSTRG. 27563. 1  | coding    | 0. 156      | 222   | 5325  | 7636  |
| MSTRG. 27563. 10 | coding    | 0. 298      | 0     | 300   | 9780  |
| MSTRG. 27563. 9  | coding    | 0. 165      | 0     | 5232  | 14221 |
| MSTRG. 27563. 6  | coding    | 0. 246      | 14055 | 17277 | 19728 |
| MSTRG. 27563. 7  | coding    | 0. 259      | 0     | 3339  | 5622  |
| MSTRG. 27563. 8  | coding    | 0. 27       | 0     | 3018  | 5301  |
| MSTRG. 27563. 11 | coding    | 0. 246      | 2409  | 5631  | 8082  |
| MSTRG. 27563. 12 | coding    | 0. 249      | 9153  | 12423 | 14728 |
| MSTRG. 27563. 13 | coding    | 0. 248      | 489   | 3678  | 3851  |
| MSTRG. 27563. 14 | noncoding | -0. 137216  | 0     | 75    | 701   |
| MSTRG. 27563. 15 | coding    | 0. 245      | 1437  | 4677  | 6982  |
| MSTRG. 27565. 1  | coding    | 0. 06       | 2208  | 3264  | 5518  |
| MSTRG. 27563. 16 | coding    | 0. 25       | 426   | 3582  | 5885  |
| MSTRG. 27563. 17 | coding    | 0. 244      | 6702  | 9672  | 12124 |
| MSTRG. 27567. 5  | coding    | 0. 549      | 351   | 3576  | 3734  |
| MSTRG. 27567. 6  | coding    | 0. 536      | 471   | 3888  | 4046  |
| MSTRG. 27569. 2  | coding    | 0. 211      | 657   | 3696  | 6188  |
| MSTRG. 27596. 1  | coding    | 0. 48       | 600   | 4407  | 4625  |
| MSTRG. 27596. 3  | coding    | 0. 47       | 0     | 3981  | 4201  |
| MSTRG. 27596. 4  | coding    | 0. 469      | 0     | 3984  | 4204  |
| MSTRG. 27597. 2  | noncoding | -0. 004096  | 921   | 1062  | 1446  |
| MSTRG. 27617. 2  | coding    | 0. 457      | 321   | 1134  | 1481  |
| MSTRG. 27617. 3  | coding    | 0. 453      | 984   | 1803  | 2150  |
| MSTRG. 27617. 4  | coding    | 0. 453      | 642   | 1461  | 1809  |
| MSTRG. 27620. 8  | noncoding | -0. 0786432 | 4668  | 5277  | 5434  |
| MSTRG. 27620. 2  | coding    | 0. 16       | 3111  | 7779  | 8518  |
| MSTRG. 27620. 3  | coding    | 0. 16       | 3177  | 7845  | 8583  |
| MSTRG. 27620. 4  | coding    | 0. 16       | 5205  | 9873  | 10612 |
| MSTRG. 27620. 5  | coding    | 0. 16       | 4632  | 9300  | 10037 |
| MSTRG. 27620. 6  | coding    | 0. 16       | 3102  | 7770  | 8509  |
| MSTRG. 27620. 7  | coding    | 0. 16       | 3114  | 7782  | 8521  |
| MSTRG. 27620. 9  | coding    | 0. 141      | 4770  | 7842  | 10091 |
| MSTRG. 27620. 10 | coding    | 0. 16       | 8388  | 13056 | 13489 |
| MSTRG. 27620. 11 | coding    | 0. 16       | 2910  | 7578  | 8033  |
| MSTRG. 27620. 12 | noncoding | -0. 06144   | 1920  | 1989  | 2289  |
| MSTRG. 27622. 2  | coding    | 0. 432      | 0     | 8481  | 8649  |
| MSTRG. 27624. 2  | noncoding | -0. 0864256 | 0     | 237   | 1217  |
| MSTRG. 27624. 3  | noncoding | -0. 19456   | 24138 | 24639 | 24976 |
| MSTRG. 27598. 2  | coding    | 0. 422      | 927   | 2634  | 2874  |
| MSTRG. 27598. 3  | coding    | 0. 406      | 1617  | 3420  | 3662  |
| MSTRG. 27601. 1  | noncoding | -0. 0720896 | 0     | 132   | 342   |
| MSTRG. 27602. 1  | noncoding | -0. 073728  | 129   | 201   | 1103  |

|                  |           |             |      |      |      |
|------------------|-----------|-------------|------|------|------|
| MSTRG. 27605. 1  | coding    | 0. 093      | 57   | 708  | 1116 |
| MSTRG. 27605. 5  | coding    | 0. 162      | 342  | 1140 | 1467 |
| MSTRG. 27605. 2  | coding    | 0. 136      | 0    | 1452 | 1880 |
| MSTRG. 27605. 4  | coding    | 0. 121      | 0    | 1401 | 1829 |
| MSTRG. 27606. 1  | coding    | 0. 001      | 300  | 618  | 1136 |
| MSTRG. 27599. 2  | coding    | 0. 143      | 24   | 426  | 1821 |
| MSTRG. 27630. 1  | noncoding | -0. 0258048 | 885  | 1041 | 2206 |
| MSTRG. 27633. 1  | noncoding | -0. 0765952 | 357  | 570  | 2605 |
| MSTRG. 27626. 1  | coding    | 0. 519      | 546  | 4917 | 8761 |
| MSTRG. 27626. 2  | noncoding | -0. 0700416 | 0    | 159  | 414  |
| MSTRG. 27626. 3  | noncoding | -0. 06144   | 9    | 288  | 523  |
| MSTRG. 27627. 1  | noncoding | -0. 006144  | 2286 | 2442 | 2598 |
| MSTRG. 27628. 1  | noncoding | -0. 0004096 | 1701 | 1866 | 4170 |
| MSTRG. 27651. 1  | coding    | 0. 509      | 1092 | 2811 | 3109 |
| MSTRG. 27651. 2  | coding    | 0. 511      | 1932 | 3639 | 3939 |
| MSTRG. 27651. 3  | coding    | 0. 386      | 546  | 1452 | 1751 |
| MSTRG. 27655. 1  | coding    | 0. 269      | 282  | 984  | 5658 |
| MSTRG. 27655. 2  | coding    | 0. 295      | 585  | 1068 | 1771 |
| MSTRG. 27666. 2  | coding    | 0. 435      | 0    | 597  | 823  |
| MSTRG. 27667. 1  | noncoding | -0. 0188416 | 738  | 906  | 1921 |
| MSTRG. 27668. 6  | coding    | 0. 352      | 714  | 1959 | 4141 |
| MSTRG. 27668. 7  | coding    | 0. 388      | 681  | 1056 | 3304 |
| MSTRG. 27668. 8  | coding    | 0. 3        | 255  | 1236 | 2779 |
| MSTRG. 27668. 9  | coding    | 0. 352      | 255  | 1500 | 3682 |
| MSTRG. 27668. 10 | noncoding | -0. 067584  | 1383 | 2475 | 2676 |
| MSTRG. 27669. 5  | coding    | 0. 326      | 0    | 267  | 710  |
| MSTRG. 27669. 6  | coding    | 0. 326      | 0    | 267  | 1134 |
| MSTRG. 27669. 7  | noncoding | -0. 0770048 | 873  | 1434 | 1588 |
| MSTRG. 27669. 8  | noncoding | -0. 0503808 | 6    | 381  | 1714 |
| MSTRG. 27659. 1  | noncoding | -0. 0008192 | 54   | 201  | 573  |
| MSTRG. 27673. 1  | noncoding | -0. 0028672 | 4767 | 5067 | 5223 |
| MSTRG. 27676. 3  | coding    | 0. 297      | 0    | 2127 | 2366 |
| MSTRG. 27676. 4  | coding    | 0. 31       | 0    | 1968 | 2624 |
| MSTRG. 27676. 6  | coding    | 0. 298      | 0    | 2112 | 2349 |
| MSTRG. 27676. 7  | coding    | 0. 298      | 0    | 2109 | 2346 |
| MSTRG. 27676. 8  | coding    | 0. 292      | 3    | 2139 | 2378 |
| MSTRG. 27676. 10 | coding    | 0. 292      | 360  | 2511 | 2750 |
| MSTRG. 27680. 1  | coding    | 0. 457      | 627  | 2550 | 6498 |
| MSTRG. 27680. 3  | coding    | 0. 457      | 372  | 2295 | 6243 |
| MSTRG. 27680. 5  | coding    | 0. 221      | 246  | 720  | 4957 |
| MSTRG. 27680. 4  | coding    | 0. 457      | 624  | 2547 | 3388 |
| MSTRG. 27684. 4  | noncoding | -0. 0966656 | 39   | 579  | 732  |
| MSTRG. 27684. 3  | noncoding | -0. 0970752 | 153  | 690  | 845  |
| MSTRG. 27684. 2  | coding    | 0. 349      | 198  | 1083 | 1236 |
| MSTRG. 27689. 1  | noncoding | -0. 0098304 | 123  | 378  | 562  |
| MSTRG. 27690. 2  | coding    | 0. 288      | 156  | 462  | 616  |
| MSTRG. 27695. 1  | coding    | 0. 326      | 69   | 1590 | 2698 |
| MSTRG. 27695. 3  | coding    | 0. 334      | 165  | 1467 | 1625 |
| MSTRG. 27704. 1  | noncoding | -0. 0135168 | 1911 | 2046 | 2779 |
| MSTRG. 27706. 1  | noncoding | -0. 0126976 | 1086 | 1203 | 4061 |
| MSTRG. 27707. 2  | noncoding | -0. 04096   | 306  | 402  | 4113 |
| MSTRG. 27707. 1  | coding    | 0. 274      | 2046 | 2307 | 2892 |
| MSTRG. 27707. 4  | noncoding | -0. 0638976 | 288  | 600  | 2717 |
| MSTRG. 27708. 2  | coding    | 0. 305      | 186  | 438  | 593  |

|                 |           |             |      |       |       |
|-----------------|-----------|-------------|------|-------|-------|
| MSTRG. 27708. 3 | coding    | 0. 463      | 0    | 399   | 553   |
| MSTRG. 27717. 5 | coding    | 0. 523      | 0    | 4326  | 5718  |
| MSTRG. 27717. 1 | coding    | 0. 526      | 0    | 4458  | 5849  |
| MSTRG. 27717. 2 | coding    | 0. 526      | 0    | 4458  | 5769  |
| MSTRG. 27720. 1 | noncoding | -0. 126976  | 123  | 180   | 517   |
| MSTRG. 27722. 1 | noncoding | -0. 016384  | 804  | 927   | 1604  |
| MSTRG. 27718. 2 | coding    | 0. 493      | 0    | 1248  | 1827  |
| MSTRG. 27719. 1 | noncoding | -0. 0270336 | 495  | 1284  | 1462  |
| MSTRG. 27724. 4 | coding    | 0. 365      | 369  | 2397  | 5955  |
| MSTRG. 27724. 5 | coding    | 0. 353      | 129  | 2070  | 5604  |
| MSTRG. 27730. 2 | coding    | 0. 164      | 3    | 255   | 652   |
| MSTRG. 27731. 3 | coding    | 0. 41       | 1575 | 4197  | 5376  |
| MSTRG. 27732. 2 | coding    | 0. 336      | 0    | 1851  | 3353  |
| MSTRG. 27725. 1 | noncoding | -0. 1343488 | 0    | 105   | 577   |
| MSTRG. 27737. 2 | coding    | 0. 519      | 1545 | 6363  | 7787  |
| MSTRG. 27738. 1 | noncoding | -0. 0516096 | 255  | 2436  | 3556  |
| MSTRG. 27747. 1 | coding    | 0. 537      | 0    | 441   | 1720  |
| MSTRG. 27747. 2 | coding    | 0. 599      | 0    | 3888  | 7226  |
| MSTRG. 27747. 3 | coding    | 0. 563      | 0    | 4011  | 7221  |
| MSTRG. 27747. 4 | coding    | 0. 573      | 0    | 4098  | 7388  |
| MSTRG. 27748. 1 | noncoding | -0. 0827392 | 195  | 1170  | 8388  |
| MSTRG. 27748. 2 | noncoding | -0. 083968  | 9552 | 10563 | 16981 |
| MSTRG. 27751. 1 | noncoding | -0. 07168   | 0    | 357   | 511   |
| MSTRG. 27747. 5 | coding    | 0. 533      | 1419 | 5136  | 8333  |
| MSTRG. 27752. 1 | noncoding | -0. 1015808 | 0    | 336   | 492   |
| MSTRG. 27753. 1 | noncoding | -0. 0786432 | 0    | 99    | 483   |
| MSTRG. 27747. 6 | coding    | 0. 563      | 159  | 3894  | 7232  |
| MSTRG. 27747. 8 | coding    | 0. 592      | 0    | 3612  | 6935  |
| MSTRG. 27754. 1 | noncoding | -0. 0442368 | 0    | 2478  | 3724  |
| MSTRG. 27744. 2 | coding    | 0. 447      | 0    | 1215  | 2182  |
| MSTRG. 27745. 1 | coding    | 0. 395      | 18   | 3504  | 7312  |
| MSTRG. 27745. 3 | coding    | 0. 339      | 3    | 4317  | 4471  |
| MSTRG. 27769. 1 | noncoding | -0. 0262144 | 5391 | 6297  | 8995  |
| MSTRG. 27772. 3 | coding    | 0. 441      | 0    | 882   | 1614  |
| MSTRG. 27772. 4 | coding    | 0. 447      | 0    | 1008  | 1740  |
| MSTRG. 27772. 6 | coding    | 0. 453      | 0    | 1005  | 1271  |
| MSTRG. 27778. 2 | noncoding | -0. 1155072 | 0    | 231   | 3893  |
| MSTRG. 27781. 2 | coding    | 0. 497      | 0    | 2229  | 2664  |
| MSTRG. 27755. 1 | coding    | 0. 405      | 69   | 1818  | 3015  |
| MSTRG. 27757. 1 | coding    | 0. 632      | 0    | 915   | 1076  |
| MSTRG. 27782. 3 | coding    | 0. 228      | 0    | 2448  | 3303  |
| MSTRG. 27783. 1 | noncoding | -0. 0557056 | 195  | 1017  | 1900  |
| MSTRG. 27784. 1 | coding    | 0. 46       | 39   | 1863  | 2215  |
| MSTRG. 27784. 3 | coding    | 0. 552      | 564  | 1776  | 2127  |
| MSTRG. 27784. 2 | coding    | 0. 639      | 0    | 1389  | 1739  |
| MSTRG. 27786. 1 | coding    | 0. 692      | 1188 | 4080  | 4700  |
| MSTRG. 27793. 1 | noncoding | -0. 0569344 | 54   | 363   | 622   |
| MSTRG. 27794. 1 | noncoding | -0. 036864  | 261  | 336   | 492   |
| MSTRG. 27795. 1 | noncoding | -0. 0815104 | 4248 | 4536  | 6604  |
| MSTRG. 27796. 4 | coding    | 0. 63       | 0    | 5787  | 5944  |
| MSTRG. 27798. 3 | noncoding | -0. 1347584 | 0    | 804   | 1067  |
| MSTRG. 27800. 1 | noncoding | -0. 1073152 | 0    | 792   | 1549  |
| MSTRG. 27802. 2 | coding    | 0. 443      | 0    | 1953  | 2424  |
| MSTRG. 27802. 3 | coding    | 0. 419      | 0    | 2064  | 2438  |

|                  |           |             |       |       |       |
|------------------|-----------|-------------|-------|-------|-------|
| MSTRG. 27802. 4  | coding    | 0. 423      | 936   | 2589  | 3051  |
| MSTRG. 27802. 5  | coding    | 0. 397      | 330   | 2025  | 2398  |
| MSTRG. 27802. 6  | coding    | 0. 409      | 4254  | 6054  | 6452  |
| MSTRG. 27804. 2  | noncoding | -0. 08192   | 57    | 426   | 686   |
| MSTRG. 27804. 3  | noncoding | -0. 0638976 | 123   | 546   | 699   |
| MSTRG. 27801. 1  | coding    | 0. 274      | 126   | 879   | 1916  |
| MSTRG. 27801. 2  | coding    | 0. 452      | 0     | 558   | 1223  |
| MSTRG. 27807. 2  | coding    | 0. 379      | 0     | 2280  | 3010  |
| MSTRG. 27808. 4  | coding    | 0. 296      | 4164  | 6111  | 6668  |
| MSTRG. 27810. 2  | noncoding | -0. 0442368 | 375   | 525   | 857   |
| MSTRG. 27814. 1  | coding    | 0. 383      | 4008  | 5880  | 7588  |
| MSTRG. 27814. 4  | coding    | 0. 378      | 3072  | 4395  | 7720  |
| MSTRG. 27814. 5  | coding    | 0. 357      | 4302  | 5976  | 7684  |
| MSTRG. 27814. 12 | coding    | 0. 368      | 1311  | 2247  | 4373  |
| MSTRG. 27814. 14 | coding    | 0. 35       | 3993  | 5241  | 6948  |
| MSTRG. 27818. 1  | noncoding | -0. 075776  | 339   | 714   | 1373  |
| MSTRG. 27814. 15 | noncoding | -0. 0483328 | 1584  | 2298  | 2506  |
| MSTRG. 27814. 16 | noncoding | -0. 047104  | 1584  | 2292  | 2496  |
| MSTRG. 27814. 17 | noncoding | -0. 0610304 | 9     | 810   | 2519  |
| MSTRG. 27838. 3  | coding    | 0. 198      | 306   | 1731  | 2210  |
| MSTRG. 27838. 2  | coding    | 0. 189      | 156   | 1581  | 2061  |
| MSTRG. 27838. 4  | coding    | 0. 18       | 0     | 1545  | 2026  |
| MSTRG. 27839. 1  | noncoding | -0. 26624   | 108   | 141   | 295   |
| MSTRG. 27840. 1  | noncoding | -0. 0233472 | 5127  | 5208  | 7854  |
| MSTRG. 27842. 1  | noncoding | -0. 0540672 | 0     | 186   | 917   |
| MSTRG. 27842. 2  | noncoding | -0. 0319488 | 0     | 255   | 661   |
| MSTRG. 27846. 1  | coding    | 0. 468      | 0     | 708   | 1805  |
| MSTRG. 27846. 2  | coding    | 0. 365      | 5802  | 6351  | 7446  |
| MSTRG. 27846. 3  | coding    | 0. 365      | 5043  | 5592  | 6689  |
| MSTRG. 27846. 4  | coding    | 0. 12       | 15    | 3228  | 3791  |
| MSTRG. 27846. 5  | coding    | 0. 12       | 15    | 3228  | 6995  |
| MSTRG. 27846. 7  | coding    | 0. 102      | 291   | 3273  | 4021  |
| MSTRG. 27846. 9  | coding    | 0. 103      | 987   | 3912  | 4660  |
| MSTRG. 27846. 8  | coding    | 0. 103      | 2232  | 5163  | 6889  |
| MSTRG. 27846. 11 | coding    | 0. 123      | 2514  | 5664  | 7042  |
| MSTRG. 27846. 12 | coding    | 0. 103      | 2292  | 5223  | 6603  |
| MSTRG. 27847. 1  | noncoding | -0. 004096  | 2754  | 2892  | 4676  |
| MSTRG. 27848. 1  | noncoding | -0. 008192  | 213   | 354   | 1235  |
| MSTRG. 27846. 13 | coding    | 0. 124      | 12960 | 14706 | 15330 |
| MSTRG. 27846. 15 | coding    | 0. 174      | 291   | 1794  | 5344  |
| MSTRG. 27844. 2  | noncoding | -0. 0622592 | 867   | 1113  | 1683  |
| MSTRG. 27884. 3  | coding    | 0. 363      | 0     | 16785 | 17671 |
| MSTRG. 27884. 6  | coding    | 0. 306      | 0     | 22566 | 23452 |
| MSTRG. 27885. 1  | noncoding | -0. 0278528 | 1092  | 1263  | 4564  |
| MSTRG. 27884. 11 | coding    | 0. 36       | 393   | 16944 | 17097 |
| MSTRG. 27884. 9  | coding    | 0. 359      | 393   | 16926 | 17079 |
| MSTRG. 27884. 8  | coding    | 0. 357      | 393   | 17064 | 17950 |
| MSTRG. 27884. 12 | coding    | 0. 373      | 3555  | 19248 | 20201 |
| MSTRG. 27884. 14 | coding    | 0. 407      | 9309  | 21399 | 22287 |
| MSTRG. 27884. 15 | coding    | 0. 387      | 1038  | 14985 | 15873 |
| MSTRG. 27884. 16 | coding    | 0. 382      | 948   | 8841  | 9728  |
| MSTRG. 27884. 17 | coding    | 0. 383      | 897   | 8763  | 8918  |
| MSTRG. 27884. 18 | coding    | 0. 378      | 879   | 8883  | 9770  |
| MSTRG. 27884. 19 | coding    | 0. 402      | 2802  | 7620  | 7774  |

|                  |           |             |       |       |       |
|------------------|-----------|-------------|-------|-------|-------|
| MSTRG. 27884. 20 | coding    | 0. 355      | 1839  | 3930  | 4084  |
| MSTRG. 27854. 1  | noncoding | -0. 1507328 | 0     | 57    | 234   |
| MSTRG. 27852. 1  | coding    | 0. 082      | 168   | 663   | 908   |
| MSTRG. 27862. 1  | noncoding | -0. 002048  | 408   | 525   | 904   |
| MSTRG. 27863. 2  | coding    | 0. 298      | 561   | 1593  | 2865  |
| MSTRG. 27864. 1  | noncoding | -0. 1024    | 177   | 246   | 707   |
| MSTRG. 27865. 1  | noncoding | -0. 131072  | 0     | 135   | 1877  |
| MSTRG. 27870. 1  | coding    | 0. 42       | 0     | 2241  | 3064  |
| MSTRG. 27870. 3  | coding    | 0. 411      | 141   | 2340  | 2890  |
| MSTRG. 27870. 4  | coding    | 0. 432      | 0     | 2082  | 2435  |
| MSTRG. 27870. 5  | coding    | 0. 36       | 0     | 1575  | 10828 |
| MSTRG. 27875. 2  | noncoding | -0. 0057344 | 159   | 279   | 1037  |
| MSTRG. 27876. 1  | coding    | 0. 311      | 0     | 696   | 1064  |
| MSTRG. 27878. 5  | coding    | 0. 163      | 0     | 3747  | 4495  |
| MSTRG. 27880. 3  | coding    | 0. 282      | 486   | 4551  | 4885  |
| MSTRG. 27882. 2  | noncoding | -0. 0528384 | 717   | 2034  | 2761  |
| MSTRG. 27882. 4  | noncoding | -0. 0299008 | 0     | 162   | 668   |
| MSTRG. 27882. 3  | coding    | 0. 4        | 0     | 381   | 887   |
| MSTRG. 27893. 3  | coding    | 0. 291      | 945   | 3195  | 3797  |
| MSTRG. 27901. 7  | coding    | 0. 365      | 0     | 2427  | 2763  |
| MSTRG. 27901. 8  | coding    | 0. 393      | 0     | 2169  | 2478  |
| MSTRG. 27904. 1  | noncoding | -0. 079872  | 2883  | 3765  | 4257  |
| MSTRG. 27905. 5  | coding    | 0. 346      | 96    | 2292  | 2557  |
| MSTRG. 27908. 4  | coding    | 0. 275      | 0     | 507   | 691   |
| MSTRG. 27908. 5  | coding    | 0. 13       | 36    | 531   | 713   |
| MSTRG. 27909. 1  | coding    | 0. 471      | 549   | 4374  | 4549  |
| MSTRG. 27909. 4  | coding    | 0. 509      | 0     | 2679  | 2853  |
| MSTRG. 27909. 3  | coding    | 0. 508      | 0     | 2643  | 4650  |
| MSTRG. 27909. 5  | coding    | 0. 507      | 0     | 2637  | 2810  |
| MSTRG. 27910. 1  | noncoding | -0. 018432  | 0     | 189   | 758   |
| MSTRG. 27896. 1  | coding    | 0. 519      | 261   | 867   | 2209  |
| MSTRG. 27896. 2  | noncoding | -0. 1892352 | 264   | 675   | 2316  |
| MSTRG. 27897. 1  | coding    | 0. 428      | 99    | 720   | 947   |
| MSTRG. 27897. 2  | coding    | 0. 434      | 3     | 612   | 846   |
| MSTRG. 27897. 5  | coding    | 0. 429      | 18    | 639   | 874   |
| MSTRG. 27900. 2  | coding    | 0. 59       | 0     | 756   | 7295  |
| MSTRG. 27922. 2  | noncoding | -0. 0667648 | 17424 | 17961 | 29322 |
| MSTRG. 27913. 2  | noncoding | -0. 0913408 | 0     | 585   | 886   |
| MSTRG. 27925. 1  | coding    | 0. 289      | 21    | 573   | 7301  |
| MSTRG. 27925. 3  | coding    | 0. 289      | 21    | 573   | 7156  |
| MSTRG. 27928. 1  | coding    | 0. 229      | 0     | 714   | 6947  |
| MSTRG. 27934. 2  | coding    | 0. 443      | 0     | 3615  | 5842  |
| MSTRG. 27935. 1  | noncoding | -0. 0454656 | 5196  | 5499  | 17159 |
| MSTRG. 27936. 1  | noncoding | -0. 036864  | 1728  | 2019  | 4645  |
| MSTRG. 27941. 3  | coding    | 0. 357      | 96    | 1644  | 1898  |
| MSTRG. 27942. 1  | noncoding | -0. 0782336 | 930   | 1401  | 1557  |
| MSTRG. 27942. 4  | noncoding | -0. 0622592 | 204   | 624   | 780   |
| MSTRG. 27942. 3  | noncoding | -0. 0577536 | 417   | 870   | 1026  |
| MSTRG. 27942. 2  | noncoding | -0. 0421888 | 930   | 1194  | 1349  |
| MSTRG. 27943. 2  | noncoding | -0. 0503808 | 1377  | 2136  | 4731  |
| MSTRG. 27943. 1  | noncoding | -0. 0503808 | 1377  | 2136  | 4856  |
| MSTRG. 27943. 3  | noncoding | -0. 0585728 | 2415  | 2787  | 4298  |
| MSTRG. 27945. 3  | coding    | 0. 43       | 0     | 1911  | 2563  |
| MSTRG. 27945. 5  | coding    | 0. 404      | 453   | 2112  | 2772  |

|                  |           |             |       |       |       |
|------------------|-----------|-------------|-------|-------|-------|
| MSTRG. 27940. 2  | coding    | 0. 496      | 123   | 1656  | 3076  |
| MSTRG. 27949. 1  | coding    | 0. 394      | 0     | 1890  | 2901  |
| MSTRG. 27949. 2  | coding    | 0. 389      | 0     | 1974  | 2918  |
| MSTRG. 27950. 3  | coding    | 0. 222      | 0     | 1905  | 4194  |
| MSTRG. 27950. 4  | coding    | 0. 202      | 0     | 1926  | 3931  |
| MSTRG. 27951. 1  | noncoding | -0. 065536  | 1695  | 1734  | 2237  |
| MSTRG. 27950. 6  | noncoding | -0. 0528384 | 4158  | 4845  | 5000  |
| MSTRG. 27952. 1  | noncoding | -0. 057344  | 3081  | 3186  | 5464  |
| MSTRG. 27953. 1  | coding    | 0. 069      | 3783  | 3948  | 5733  |
| MSTRG. 27955. 1  | noncoding | -0. 0356352 | 1152  | 1179  | 1333  |
| MSTRG. 27954. 5  | coding    | 0. 352      | 1194  | 2172  | 2331  |
| MSTRG. 27956. 1  | coding    | 0. 165      | 0     | 2010  | 4376  |
| MSTRG. 27956. 5  | coding    | 0. 098      | 252   | 1836  | 2300  |
| MSTRG. 27957. 4  | coding    | 0. 184      | 741   | 1749  | 2306  |
| MSTRG. 27957. 3  | coding    | 0. 187      | 1167  | 2532  | 3089  |
| MSTRG. 27957. 5  | coding    | 0. 164      | 0     | 2529  | 3086  |
| MSTRG. 27957. 6  | coding    | 0. 141      | 0     | 2205  | 3135  |
| MSTRG. 27957. 7  | coding    | 0. 149      | 0     | 2445  | 3002  |
| MSTRG. 27957. 8  | coding    | 0. 144      | 0     | 2769  | 3226  |
| MSTRG. 27957. 9  | coding    | 0. 156      | 0     | 2685  | 3142  |
| MSTRG. 27957. 10 | coding    | 0. 15       | 0     | 2331  | 2486  |
| MSTRG. 27959. 1  | noncoding | -0. 0831488 | 0     | 870   | 4215  |
| MSTRG. 27960. 1  | noncoding | -0. 090112  | 612   | 702   | 5448  |
| MSTRG. 27960. 2  | noncoding | -0. 049152  | 852   | 918   | 1509  |
| MSTRG. 27961. 1  | noncoding | -0. 004096  | 948   | 1173  | 1908  |
| MSTRG. 27963. 2  | coding    | 0. 406      | 0     | 3618  | 5748  |
| MSTRG. 27967. 4  | coding    | 0. 188      | 324   | 1506  | 4858  |
| MSTRG. 27967. 5  | coding    | 0. 188      | 408   | 1590  | 4942  |
| MSTRG. 27967. 6  | coding    | 0. 188      | 999   | 2181  | 5531  |
| MSTRG. 27967. 7  | coding    | 0. 188      | 954   | 2136  | 5487  |
| MSTRG. 27968. 3  | noncoding | -0. 004096  | 1977  | 2121  | 3082  |
| MSTRG. 27968. 4  | noncoding | -0. 0475136 | 5388  | 5547  | 5778  |
| MSTRG. 27964. 2  | noncoding | -0. 0454656 | 2691  | 2871  | 3834  |
| MSTRG. 27969. 3  | coding    | 0. 259      | 132   | 861   | 1112  |
| MSTRG. 27969. 4  | coding    | 0. 268      | 207   | 918   | 1167  |
| MSTRG. 27970. 2  | coding    | 0. 413      | 9     | 522   | 1565  |
| MSTRG. 27975. 5  | coding    | 0. 095      | 9     | 459   | 3194  |
| MSTRG. 27975. 4  | coding    | 0. 054      | 393   | 771   | 1288  |
| MSTRG. 27975. 7  | noncoding | -0. 0495616 | 270   | 450   | 5769  |
| MSTRG. 27983. 2  | coding    | 0. 334      | 393   | 864   | 1241  |
| MSTRG. 27985. 1  | noncoding | -0. 0045056 | 33    | 177   | 1159  |
| MSTRG. 27988. 3  | coding    | 0. 223      | 18    | 1491  | 2290  |
| MSTRG. 27995. 1  | noncoding | -0. 0692224 | 0     | 1398  | 3523  |
| MSTRG. 27995. 3  | noncoding | -0. 155648  | 4713  | 4788  | 4944  |
| MSTRG. 27996. 1  | noncoding | -0. 0139264 | 14703 | 14787 | 15075 |
| MSTRG. 27996. 2  | noncoding | -0. 057344  | 2463  | 2538  | 13288 |
| MSTRG. 27997. 1  | noncoding | -0. 0446464 | 4644  | 4788  | 8904  |
| MSTRG. 28003. 6  | coding    | 0. 148      | 159   | 2241  | 2855  |
| MSTRG. 28004. 1  | noncoding | -0. 002048  | 0     | 147   | 302   |
| MSTRG. 28005. 1  | coding    | 0. 119      | 14112 | 14319 | 16691 |
| MSTRG. 28005. 2  | coding    | 0. 119      | 10806 | 11013 | 16701 |
| MSTRG. 28003. 7  | coding    | 0. 192      | 0     | 1104  | 8408  |
| MSTRG. 28003. 8  | coding    | 0. 138      | 657   | 1749  | 7743  |
| MSTRG. 28003. 9  | noncoding | -0. 172032  | 3693  | 3744  | 3899  |

|               |           |            |       |       |       |
|---------------|-----------|------------|-------|-------|-------|
| MSTRG.28007.2 | coding    | 0.152      | 45    | 381   | 916   |
| MSTRG.28008.1 | coding    | 0.108      | 0     | 14553 | 14854 |
| MSTRG.28008.2 | coding    | 0.108      | 0     | 14544 | 14845 |
| MSTRG.28008.3 | coding    | 0.077      | 0     | 10989 | 11285 |
| MSTRG.28009.1 | noncoding | -0.0110592 | 81    | 327   | 1026  |
| MSTRG.28011.1 | coding    | 0.198      | 0     | 75    | 232   |
| MSTRG.28012.5 | coding    | 0.553      | 1464  | 4740  | 6731  |
| MSTRG.28012.4 | coding    | 0.55       | 1464  | 4767  | 7544  |
| MSTRG.28013.3 | coding    | 0.451      | 8343  | 10242 | 11023 |
| MSTRG.28018.2 | noncoding | -0.0557056 | 5343  | 5580  | 9463  |
| MSTRG.28033.6 | coding    | 0.228      | 399   | 1236  | 1907  |
| MSTRG.28033.8 | coding    | 0.228      | 531   | 1368  | 2039  |
| MSTRG.28033.5 | coding    | 0.22       | 312   | 1167  | 1839  |
| MSTRG.28033.7 | coding    | 0.228      | 312   | 1149  | 1821  |
| MSTRG.28034.2 | coding    | 0.165      | 213   | 4182  | 4339  |
| MSTRG.28034.4 | coding    | 0.142      | 780   | 4092  | 4248  |
| MSTRG.28034.9 | coding    | 0.141      | 1341  | 3135  | 4080  |
| MSTRG.28034.5 | coding    | 0.161      | 1659  | 3501  | 3656  |
| MSTRG.28034.6 | coding    | 0.161      | 1575  | 3417  | 3573  |
| MSTRG.28025.1 | noncoding | -0.0253952 | 168   | 432   | 2498  |
| MSTRG.28024.4 | coding    | 0.459      | 0     | 1572  | 3284  |
| MSTRG.28027.1 | noncoding | -0.0622592 | 0     | 156   | 505   |
| MSTRG.28027.2 | noncoding | -0.0622592 | 0     | 156   | 509   |
| MSTRG.28040.1 | coding    | 0.362      | 234   | 2202  | 5493  |
| MSTRG.28040.2 | coding    | 0.41       | 975   | 2634  | 6067  |
| MSTRG.28040.4 | coding    | 0.41       | 990   | 2649  | 5162  |
| MSTRG.28045.3 | coding    | 0.357      | 264   | 762   | 4464  |
| MSTRG.28035.2 | noncoding | -0.0700416 | 471   | 1446  | 1600  |
| MSTRG.28055.1 | noncoding | -0.0004096 | 1575  | 1716  | 5599  |
| MSTRG.28058.1 | noncoding | -0.0278528 | 1866  | 1956  | 4377  |
| MSTRG.28059.1 | noncoding | -0.0004096 | 0     | 0     | 792   |
| MSTRG.28051.1 | coding    | 0.143      | 10617 | 13728 | 16919 |
| MSTRG.28051.4 | noncoding | -0.0688128 | 1716  | 1905  | 9462  |
| MSTRG.28051.7 | noncoding | -0.0004096 | 8304  | 8448  | 10536 |
| MSTRG.28062.1 | noncoding | -0.0004096 | 12    | 423   | 1098  |
| MSTRG.28064.1 | coding    | 0.413      | 0     | 714   | 868   |
| MSTRG.28070.1 | coding    | 0.454      | 0     | 5268  | 6527  |
| MSTRG.28072.3 | coding    | 0.353      | 282   | 1035  | 1192  |
| MSTRG.28076.1 | noncoding | -0.0229376 | 0     | 201   | 355   |
| MSTRG.28075.1 | coding    | 0.541      | 0     | 756   | 911   |
| MSTRG.28081.1 | coding    | 0.388      | 0     | 2910  | 3653  |
| MSTRG.28085.6 | coding    | 0.486      | 273   | 2010  | 2711  |
| MSTRG.28091.4 | noncoding | -0.0376832 | 3390  | 3600  | 5149  |
| MSTRG.28091.2 | coding    | 0.119      | 612   | 2130  | 3394  |
| MSTRG.28093.2 | coding    | 0.456      | 93    | 1749  | 2665  |
| MSTRG.28095.3 | noncoding | -0.0688128 | 342   | 543   | 698   |
| MSTRG.28095.2 | coding    | 0.445      | 0     | 459   | 869   |
| MSTRG.28097.2 | noncoding | -0.0724992 | 0     | 273   | 778   |
| MSTRG.28098.2 | coding    | 0.373      | 159   | 642   | 3168  |
| MSTRG.28098.1 | coding    | 0.326      | 0     | 642   | 3382  |
| MSTRG.28098.3 | coding    | 0.185      | 132   | 696   | 1121  |
| MSTRG.28099.3 | coding    | 0.517      | 3     | 2535  | 2690  |
| MSTRG.28100.1 | coding    | 0.39       | 0     | 2286  | 2530  |
| MSTRG.28100.5 | coding    | 0.39       | 0     | 2271  | 2514  |

|               |           |            |      |      |      |
|---------------|-----------|------------|------|------|------|
| MSTRG.28100.6 | coding    | 0.418      | 0    | 2145 | 2301 |
| MSTRG.28100.7 | coding    | 0.415      | 0    | 2064 | 2652 |
| MSTRG.28100.8 | coding    | 0.387      | 0    | 2190 | 2434 |
| MSTRG.28105.5 | coding    | 0.359      | 0    | 1635 | 2237 |
| MSTRG.28105.6 | coding    | 0.354      | 0    | 1533 | 2133 |
| MSTRG.28107.1 | coding    | 0.456      | 873  | 3075 | 3409 |
| MSTRG.28109.3 | coding    | 0.075      | 0    | 798  | 1260 |
| MSTRG.28109.4 | coding    | 0.17       | 0    | 498  | 1202 |
| MSTRG.28109.2 | coding    | 0.139      | 0    | 639  | 1105 |
| MSTRG.28109.5 | coding    | 0.113      | 0    | 801  | 1264 |
| MSTRG.28121.1 | noncoding | -0.028672  | 5010 | 5076 | 6396 |
| MSTRG.28122.1 | noncoding | -0.057344  | 264  | 315  | 477  |
| MSTRG.28115.4 | noncoding | -0.0004096 | 987  | 987  | 1353 |
| MSTRG.28114.2 | coding    | 0.387      | 0    | 1251 | 2157 |
| MSTRG.28127.1 | noncoding | -0.0004096 | 138  | 159  | 464  |
| MSTRG.28132.2 | coding    | 0.025      | 618  | 1485 | 1768 |
| MSTRG.28137.1 | noncoding | -0.0651264 | 666  | 981  | 1137 |
| MSTRG.28131.3 | noncoding | -0.0290816 | 426  | 588  | 742  |
| MSTRG.28141.1 | noncoding | -0.008192  | 30   | 141  | 455  |
| MSTRG.28142.2 | coding    | 0.347      | 219  | 2097 | 3367 |
| MSTRG.28147.1 | coding    | 0.113      | 321  | 2229 | 5258 |
| MSTRG.28154.1 | noncoding | -0.0847872 | 0    | 45   | 388  |
| MSTRG.28160.1 | coding    | 0.117      | 189  | 2169 | 2618 |
| MSTRG.28160.5 | coding    | 0.165      | 183  | 693  | 3450 |
| MSTRG.28161.1 | noncoding | -0.049152  | 96   | 186  | 763  |
| MSTRG.28162.1 | coding    | 0.062      | 192  | 696  | 1842 |
| MSTRG.28168.3 | coding    | 0.23       | 0    | 1368 | 1725 |
| MSTRG.28174.1 | noncoding | -0.0319488 | 231  | 465  | 1950 |
| MSTRG.28174.2 | noncoding | -0.0212992 | 75   | 264  | 1551 |
| MSTRG.28175.1 | noncoding | -0.0831488 | 330  | 534  | 1340 |
| MSTRG.28177.1 | noncoding | -0.0032768 | 1965 | 2052 | 2366 |
| MSTRG.28178.1 | coding    | 0.075      | 2082 | 3387 | 7084 |
| MSTRG.28171.1 | noncoding | -0.0053248 | 153  | 237  | 474  |
| MSTRG.28186.1 | noncoding | -0.086016  | 1158 | 1173 | 1378 |
| MSTRG.28191.1 | noncoding | -0.026624  | 102  | 261  | 928  |
| MSTRG.28191.8 | noncoding | -0.0700416 | 0    | 123  | 835  |
| MSTRG.28192.3 | coding    | 0.25       | 201  | 768  | 1374 |
| MSTRG.28204.2 | coding    | 0.249      | 39   | 261  | 1544 |
| MSTRG.28207.1 | noncoding | -0.0372736 | 0    | 117  | 353  |
| MSTRG.28207.2 | noncoding | -0.016384  | 360  | 498  | 738  |
| MSTRG.28207.3 | noncoding | -0.024576  | 0    | 48   | 219  |
| MSTRG.28211.2 | coding    | 0.304      | 396  | 1068 | 2122 |
| MSTRG.28213.2 | coding    | 0.248      | 0    | 333  | 926  |
| MSTRG.28194.2 | coding    | 0.378      | 0    | 579  | 735  |
| MSTRG.28196.2 | noncoding | -0.032768  | 429  | 438  | 649  |
| MSTRG.28197.1 | noncoding | -0.0438272 | 363  | 441  | 595  |
| MSTRG.28214.1 | noncoding | -0.02048   | 672  | 675  | 829  |
| MSTRG.28220.1 | coding    | 0.283      | 225  | 2565 | 3701 |
| MSTRG.28220.2 | coding    | 0.291      | 0    | 1872 | 8055 |
| MSTRG.28223.2 | noncoding | -0.0851968 | 369  | 600  | 1479 |
| MSTRG.28224.2 | coding    | 0.383      | 366  | 1203 | 2339 |
| MSTRG.28217.1 | noncoding | -0.012288  | 408  | 534  | 738  |
| MSTRG.28217.2 | noncoding | -0.02048   | 399  | 615  | 904  |
| MSTRG.28225.1 | coding    | 0.188      | 243  | 1065 | 1218 |



|                  |           |             |      |      |      |
|------------------|-----------|-------------|------|------|------|
| MSTRG. 28227. 3  | coding    | 0. 384      | 951  | 2103 | 2275 |
| MSTRG. 28249. 2  | coding    | 0. 391      | 0    | 5172 | 5390 |
| MSTRG. 28249. 3  | coding    | 0. 391      | 0    | 5172 | 5390 |
| MSTRG. 28249. 4  | coding    | 0. 395      | 0    | 5073 | 5654 |
| MSTRG. 28249. 5  | coding    | 0. 392      | 0    | 5172 | 5389 |
| MSTRG. 28249. 7  | coding    | 0. 41       | 6    | 2799 | 3012 |
| MSTRG. 28249. 8  | coding    | 0. 391      | 6    | 1938 | 3247 |
| MSTRG. 28249. 6  | coding    | 0. 392      | 0    | 5172 | 5385 |
| MSTRG. 28249. 9  | coding    | 0. 406      | 984  | 5055 | 5252 |
| MSTRG. 28249. 11 | coding    | 0. 394      | 0    | 5136 | 5289 |
| MSTRG. 28250. 1  | coding    | 0. 404      | 0    | 585  | 742  |
| MSTRG. 28251. 1  | coding    | 0. 365      | 897  | 2955 | 4619 |
| MSTRG. 28251. 2  | coding    | 0. 365      | 897  | 2955 | 4733 |
| MSTRG. 28251. 5  | coding    | 0. 365      | 591  | 2649 | 4236 |
| MSTRG. 28251. 6  | noncoding | -0. 1097728 | 588  | 882  | 1323 |
| MSTRG. 28249. 13 | coding    | 0. 396      | 0    | 5184 | 5424 |
| MSTRG. 28232. 2  | coding    | 0. 425      | 0    | 3588 | 3743 |
| MSTRG. 28233. 2  | coding    | 0. 476      | 0    | 1029 | 1185 |
| MSTRG. 28233. 3  | coding    | 0. 471      | 0    | 1149 | 1304 |
| MSTRG. 28233. 4  | coding    | 0. 454      | 0    | 1032 | 1186 |
| MSTRG. 28236. 2  | coding    | 0. 495      | 1566 | 3567 | 3790 |
| MSTRG. 28236. 4  | coding    | 0. 495      | 1650 | 3651 | 3875 |
| MSTRG. 28229. 1  | coding    | 0. 364      | 0    | 1125 | 1724 |
| MSTRG. 28239. 1  | coding    | 0. 32       | 0    | 2403 | 2900 |
| MSTRG. 28244. 2  | coding    | 0. 426      | 1542 | 5445 | 5623 |
| MSTRG. 28244. 3  | noncoding | -0. 0004096 | 69   | 177  | 666  |
| MSTRG. 28244. 6  | coding    | 0. 462      | 51   | 3480 | 3660 |
| MSTRG. 28246. 2  | coding    | 0. 296      | 78   | 717  | 1029 |
| MSTRG. 28247. 1  | coding    | 0. 222      | 576  | 888  | 3934 |
| MSTRG. 28247. 3  | coding    | 0. 228      | 498  | 963  | 2780 |
| MSTRG. 28247. 5  | coding    | 0. 199      | 30   | 702  | 2321 |
| MSTRG. 28247. 2  | coding    | 0. 254      | 705  | 1089 | 2905 |
| MSTRG. 28241. 1  | noncoding | -0. 024576  | 423  | 594  | 902  |
| MSTRG. 28242. 1  | coding    | 0. 383      | 0    | 696  | 3788 |
| MSTRG. 28242. 3  | coding    | 0. 383      | 0    | 696  | 3447 |
| MSTRG. 28242. 5  | coding    | 0. 392      | 0    | 660  | 1997 |
| MSTRG. 28243. 1  | coding    | 0. 186      | 384  | 1455 | 1677 |
| MSTRG. 28255. 2  | coding    | 0. 249      | 993  | 1449 | 1639 |
| MSTRG. 28256. 5  | coding    | 0. 311      | 18   | 3501 | 3657 |
| MSTRG. 28257. 2  | coding    | 0. 262      | 108  | 6477 | 6635 |
| MSTRG. 28257. 3  | coding    | 0. 26       | 708  | 7146 | 7300 |
| MSTRG. 28257. 4  | coding    | 0. 26       | 108  | 6486 | 6641 |
| MSTRG. 28300. 1  | noncoding | -0. 034816  | 576  | 735  | 889  |
| MSTRG. 28300. 2  | noncoding | -0. 1015808 | 504  | 1002 | 2467 |
| MSTRG. 28301. 1  | noncoding | -0. 045056  | 0    | 72   | 446  |
| MSTRG. 28300. 3  | coding    | 0. 403      | 33   | 1086 | 2551 |
| MSTRG. 28300. 4  | coding    | 0. 415      | 12   | 966  | 1125 |
| MSTRG. 28300. 5  | coding    | 0. 41       | 12   | 969  | 1125 |
| MSTRG. 28300. 6  | coding    | 0. 393      | 12   | 1074 | 3728 |
| MSTRG. 28300. 8  | coding    | 0. 434      | 0    | 900  | 1056 |
| MSTRG. 28300. 9  | coding    | 0. 443      | 0    | 996  | 2465 |
| MSTRG. 28300. 10 | coding    | 0. 34       | 0    | 1029 | 3682 |
| MSTRG. 28308. 1  | coding    | 0. 441      | 165  | 2880 | 3321 |
| MSTRG. 28308. 6  | coding    | 0. 444      | 381  | 3114 | 3555 |

|                |           |            |      |      |       |
|----------------|-----------|------------|------|------|-------|
| MSTRG.28312.1  | coding    | 0.4        | 39   | 3129 | 4750  |
| MSTRG.28312.3  | coding    | 0.402      | 12   | 2955 | 4267  |
| MSTRG.28312.2  | coding    | 0.394      | 210  | 3285 | 4597  |
| MSTRG.28312.4  | coding    | 0.395      | 93   | 3159 | 4151  |
| MSTRG.28315.1  | noncoding | -0.0069632 | 12   | 126  | 561   |
| MSTRG.28316.8  | coding    | 0.46       | 0    | 1530 | 1894  |
| MSTRG.28319.1  | coding    | 0.185      | 3    | 4533 | 4686  |
| MSTRG.28319.2  | coding    | 0.185      | 3    | 4536 | 4689  |
| MSTRG.28319.4  | coding    | 0.188      | 123  | 4470 | 4623  |
| MSTRG.28319.6  | coding    | 0.178      | 123  | 5043 | 5196  |
| MSTRG.28321.1  | coding    | 0.285      | 0    | 2061 | 3003  |
| MSTRG.28325.2  | coding    | 0.191      | 900  | 1827 | 3658  |
| MSTRG.28325.5  | coding    | 0.151      | 108  | 1008 | 1324  |
| MSTRG.28324.3  | coding    | 0.301      | 366  | 3219 | 4350  |
| MSTRG.28326.1  | coding    | 0.55       | 252  | 2946 | 6011  |
| MSTRG.28328.2  | noncoding | -0.0589824 | 567  | 1584 | 2517  |
| MSTRG.28329.3  | coding    | 0.383      | 9    | 1875 | 6399  |
| MSTRG.28332.2  | noncoding | -0.0561152 | 195  | 738  | 972   |
| MSTRG.28300.13 | noncoding | -0.0147456 | 276  | 456  | 2768  |
| MSTRG.28266.4  | coding    | 0.453      | 0    | 1050 | 1655  |
| MSTRG.28266.5  | coding    | 0.459      | 0    | 921  | 1075  |
| MSTRG.28266.7  | coding    | 0.541      | 0    | 375  | 530   |
| MSTRG.28267.1  | noncoding | -0.0528384 | 612  | 939  | 1096  |
| MSTRG.28267.2  | noncoding | -0.028672  | 609  | 828  | 985   |
| MSTRG.28266.17 | coding    | 0.485      | 0    | 267  | 422   |
| MSTRG.28274.1  | coding    | 0.09       | 99   | 300  | 1731  |
| MSTRG.28274.2  | coding    | 0.259      | 0    | 231  | 1661  |
| MSTRG.28270.1  | coding    | 0.198      | 435  | 2040 | 5243  |
| MSTRG.28271.1  | coding    | 0.281      | 387  | 918  | 3405  |
| MSTRG.28281.2  | coding    | 0.441      | 0    | 2859 | 4216  |
| MSTRG.28281.3  | coding    | 0.423      | 0    | 2868 | 4224  |
| MSTRG.28281.4  | coding    | 0.424      | 0    | 2949 | 4305  |
| MSTRG.28281.5  | coding    | 0.436      | 0    | 2778 | 3952  |
| MSTRG.28281.6  | coding    | 0.461      | 0    | 2511 | 3868  |
| MSTRG.28281.7  | coding    | 0.462      | 0    | 2565 | 3020  |
| MSTRG.28281.8  | coding    | 0.433      | 201  | 2793 | 4149  |
| MSTRG.28281.9  | coding    | 0.407      | 3180 | 4215 | 6589  |
| MSTRG.28281.10 | coding    | 0.43       | 432  | 1302 | 1842  |
| MSTRG.28294.2  | coding    | 0.221      | 1200 | 2226 | 2590  |
| MSTRG.28297.3  | noncoding | -0.0618496 | 51   | 276  | 589   |
| MSTRG.28335.1  | coding    | 0.112      | 555  | 2316 | 5461  |
| MSTRG.28336.1  | noncoding | -0.0229376 | 36   | 108  | 270   |
| MSTRG.28335.2  | coding    | 0.117      | 0    | 1857 | 4649  |
| MSTRG.28335.3  | coding    | 0.116      | 0    | 1839 | 5611  |
| MSTRG.28338.1  | coding    | 0.136      | 216  | 2598 | 2777  |
| MSTRG.28339.3  | coding    | 0.193      | 4959 | 6297 | 7347  |
| MSTRG.28341.2  | coding    | 0.31       | 261  | 1035 | 2906  |
| MSTRG.28341.4  | coding    | 0.336      | 261  | 966  | 3780  |
| MSTRG.28342.3  | coding    | 0.121      | 273  | 1860 | 12054 |
| MSTRG.28342.4  | coding    | 0.121      | 378  | 1965 | 10774 |
| MSTRG.28343.1  | noncoding | -0.024576  | 210  | 246  | 540   |
| MSTRG.28367.1  | coding    | 0.472      | 3    | 366  | 522   |
| MSTRG.28367.2  | coding    | 0.505      | 0    | 345  | 500   |
| MSTRG.28368.2  | coding    | 0.593      | 0    | 348  | 505   |

|                  |           |             |       |       |       |
|------------------|-----------|-------------|-------|-------|-------|
| MSTRG. 28370. 1  | coding    | 0. 492      | 30    | 375   | 529   |
| MSTRG. 28371. 1  | coding    | 0. 247      | 12    | 1083  | 1612  |
| MSTRG. 28372. 1  | coding    | 0. 365      | 192   | 477   | 633   |
| MSTRG. 28375. 1  | noncoding | -0. 0053248 | 741   | 759   | 913   |
| MSTRG. 28377. 1  | coding    | 0. 249      | 0     | 762   | 1079  |
| MSTRG. 28371. 2  | coding    | 0. 374      | 27    | 318   | 472   |
| MSTRG. 28371. 3  | coding    | 0. 304      | 0     | 597   | 2690  |
| MSTRG. 28378. 1  | coding    | 0. 295      | 39    | 330   | 582   |
| MSTRG. 28379. 1  | coding    | 0. 548      | 0     | 537   | 691   |
| MSTRG. 28380. 1  | coding    | 0. 496      | 0     | 369   | 704   |
| MSTRG. 28386. 3  | coding    | 0. 547      | 0     | 324   | 479   |
| MSTRG. 28386. 2  | coding    | 0. 554      | 0     | 312   | 466   |
| MSTRG. 28388. 1  | coding    | 0. 651      | 0     | 333   | 488   |
| MSTRG. 28386. 4  | coding    | 0. 515      | 0     | 312   | 473   |
| MSTRG. 28388. 2  | noncoding | -0. 2998272 | 0     | 318   | 568   |
| MSTRG. 28389. 1  | coding    | 0. 425      | 2274  | 2889  | 5896  |
| MSTRG. 28379. 2  | coding    | 0. 534      | 0     | 357   | 526   |
| MSTRG. 28388. 3  | coding    | 0. 744      | 0     | 324   | 573   |
| MSTRG. 28371. 4  | coding    | 0. 443      | 0     | 303   | 458   |
| MSTRG. 28359. 7  | noncoding | -0. 0167936 | 1608  | 1785  | 2822  |
| MSTRG. 28359. 6  | coding    | 0. 257      | 432   | 1884  | 2921  |
| MSTRG. 28359. 3  | coding    | 0. 275      | 2709  | 4011  | 5049  |
| MSTRG. 28359. 5  | coding    | 0. 261      | 1143  | 3075  | 4112  |
| MSTRG. 28359. 8  | coding    | 0. 257      | 1518  | 2967  | 3999  |
| MSTRG. 28359. 9  | coding    | 0. 26       | 396   | 2331  | 3363  |
| MSTRG. 28359. 10 | coding    | 0. 065      | 3201  | 3453  | 4134  |
| MSTRG. 28361. 1  | coding    | 0. 206      | 318   | 507   | 1772  |
| MSTRG. 28362. 1  | noncoding | -0. 118784  | 4020  | 4044  | 4245  |
| MSTRG. 28359. 11 | noncoding | -0. 0659456 | 13947 | 14151 | 17006 |
| MSTRG. 28363. 1  | noncoding | -0. 0585728 | 23235 | 23448 | 38489 |
| MSTRG. 28363. 2  | noncoding | -0. 053248  | 1950  | 2055  | 3541  |
| MSTRG. 28363. 3  | noncoding | -0. 0319488 | 11220 | 11475 | 15908 |
| MSTRG. 28366. 4  | coding    | 0. 284      | 201   | 1962  | 3051  |
| MSTRG. 28366. 5  | coding    | 0. 28       | 3180  | 6114  | 7689  |
| MSTRG. 28366. 6  | coding    | 0. 291      | 2451  | 4176  | 5266  |
| MSTRG. 28393. 1  | noncoding | -0. 0360448 | 3159  | 3978  | 4287  |
| MSTRG. 28393. 3  | coding    | 0. 108      | 2241  | 2799  | 4163  |
| MSTRG. 28393. 4  | coding    | 0. 108      | 2241  | 2799  | 3939  |
| MSTRG. 28393. 6  | noncoding | -0. 069632  | 282   | 660   | 4177  |
| MSTRG. 28393. 2  | coding    | 0. 112      | 2241  | 2802  | 4076  |
| MSTRG. 28397. 1  | coding    | 0. 135      | 0     | 1245  | 1946  |
| MSTRG. 28399. 2  | coding    | 0. 295      | 0     | 1551  | 1843  |
| MSTRG. 28400. 1  | coding    | 0. 272      | 0     | 1539  | 2159  |
| MSTRG. 28400. 2  | coding    | 0. 271      | 0     | 1518  | 2138  |
| MSTRG. 28400. 3  | coding    | 0. 277      | 0     | 1596  | 2217  |
| MSTRG. 28401. 1  | noncoding | -0. 024576  | 270   | 384   | 643   |
| MSTRG. 28391. 2  | coding    | 0. 309      | 0     | 543   | 816   |
| MSTRG. 28403. 1  | noncoding | -0. 1445888 | 0     | 9     | 215   |
| MSTRG. 28404. 1  | coding    | 0. 049      | 426   | 813   | 1086  |
| MSTRG. 28409. 2  | noncoding | -0. 0475136 | 2994  | 3033  | 3257  |
| MSTRG. 28409. 1  | noncoding | -0. 0475136 | 2505  | 3054  | 3208  |
| MSTRG. 28409. 3  | noncoding | -0. 004096  | 528   | 570   | 793   |
| MSTRG. 28409. 4  | noncoding | -0. 004096  | 387   | 429   | 653   |
| MSTRG. 28409. 6  | noncoding | -0. 02048   | 2076  | 2181  | 2722  |

|                  |           |             |       |       |       |
|------------------|-----------|-------------|-------|-------|-------|
| MSTRG. 28409. 5  | noncoding | -0. 065536  | 180   | 249   | 666   |
| MSTRG. 28409. 7  | noncoding | -0. 004096  | 7032  | 7074  | 7273  |
| MSTRG. 28409. 8  | noncoding | -0. 016384  | 198   | 276   | 825   |
| MSTRG. 28410. 1  | noncoding | -0. 016384  | 6096  | 6162  | 6408  |
| MSTRG. 28409. 9  | noncoding | -0. 0016384 | 1992  | 2118  | 2666  |
| MSTRG. 28409. 10 | noncoding | -0. 167936  | 2238  | 2298  | 4942  |
| MSTRG. 28411. 1  | noncoding | -0. 0004096 | 2166  | 2241  | 3550  |
| MSTRG. 28409. 11 | noncoding | -0. 012288  | 90    | 156   | 506   |
| MSTRG. 28449. 3  | coding    | 0. 513      | 99    | 1407  | 1567  |
| MSTRG. 28457. 1  | coding    | 0. 093      | 390   | 1485  | 2702  |
| MSTRG. 28457. 2  | coding    | 0. 093      | 390   | 1485  | 2447  |
| MSTRG. 28457. 5  | coding    | 0. 089      | 2556  | 3864  | 4758  |
| MSTRG. 28457. 6  | coding    | 0. 078      | 405   | 1695  | 2588  |
| MSTRG. 28459. 1  | noncoding | -0. 008192  | 765   | 873   | 3355  |
| MSTRG. 28460. 1  | noncoding | -0. 0098304 | 3675  | 4086  | 8758  |
| MSTRG. 28463. 1  | noncoding | -0. 0118784 | 3462  | 3726  | 5114  |
| MSTRG. 28464. 1  | noncoding | -0. 0270336 | 8985  | 9078  | 11933 |
| MSTRG. 28466. 1  | noncoding | -0. 057344  | 615   | 723   | 1305  |
| MSTRG. 28467. 1  | noncoding | -0. 110592  | 870   | 927   | 3366  |
| MSTRG. 28470. 1  | noncoding | -0. 04096   | 0     | 126   | 7759  |
| MSTRG. 28470. 2  | noncoding | -0. 04096   | 0     | 126   | 7489  |
| MSTRG. 28471. 2  | coding    | 0. 148      | 5583  | 6510  | 9975  |
| MSTRG. 28471. 3  | coding    | 0. 148      | 5412  | 6339  | 9745  |
| MSTRG. 28474. 1  | noncoding | -0. 012288  | 1998  | 2121  | 2967  |
| MSTRG. 28471. 4  | noncoding | -0. 124928  | 0     | 141   | 15005 |
| MSTRG. 28476. 2  | coding    | 0. 18       | 342   | 807   | 1780  |
| MSTRG. 28430. 1  | noncoding | -0. 0544768 | 1257  | 1431  | 1586  |
| MSTRG. 28430. 2  | noncoding | -0. 0233472 | 0     | 204   | 1162  |
| MSTRG. 28432. 1  | coding    | 0. 408      | 156   | 816   | 1044  |
| MSTRG. 28433. 1  | noncoding | -0. 0139264 | 525   | 627   | 887   |
| MSTRG. 28439. 1  | coding    | 0. 24       | 0     | 2496  | 4365  |
| MSTRG. 28443. 1  | noncoding | -0. 02048   | 429   | 471   | 653   |
| MSTRG. 28442. 2  | coding    | 0. 072      | 345   | 1146  | 3749  |
| MSTRG. 28445. 1  | coding    | 0. 446      | 0     | 789   | 4639  |
| MSTRG. 28480. 2  | noncoding | -0. 0098304 | 27    | 162   | 318   |
| MSTRG. 28480. 1  | noncoding | -0. 0446464 | 318   | 363   | 518   |
| MSTRG. 28480. 3  | noncoding | -0. 0065536 | 2127  | 2274  | 2535  |
| MSTRG. 28481. 3  | coding    | 0. 342      | 66    | 1332  | 2932  |
| MSTRG. 28485. 1  | noncoding | -0. 016384  | 18303 | 18408 | 26684 |
| MSTRG. 28485. 2  | noncoding | -0. 016384  | 3375  | 3480  | 12020 |
| MSTRG. 28485. 3  | noncoding | -0. 012288  | 2067  | 2193  | 9093  |
| MSTRG. 28485. 4  | noncoding | -0. 08192   | 453   | 567   | 3683  |
| MSTRG. 28485. 5  | noncoding | -0. 0331776 | 1602  | 1815  | 3185  |
| MSTRG. 28485. 6  | noncoding | -0. 0118784 | 39    | 174   | 3047  |
| MSTRG. 28487. 2  | coding    | 0. 206      | 111   | 1749  | 1993  |
| MSTRG. 28487. 3  | coding    | 0. 24       | 96    | 1659  | 1903  |
| MSTRG. 28488. 1  | coding    | 0. 412      | 258   | 3918  | 7823  |
| MSTRG. 28488. 2  | coding    | 0. 413      | 795   | 4446  | 8242  |
| MSTRG. 28488. 3  | coding    | 0. 413      | 1053  | 4704  | 8498  |
| MSTRG. 28488. 4  | coding    | 0. 412      | 531   | 4191  | 5157  |
| MSTRG. 28488. 5  | coding    | 0. 405      | 13920 | 17451 | 18427 |
| MSTRG. 28488. 7  | noncoding | -0. 0712704 | 11277 | 11505 | 19246 |
| MSTRG. 28489. 1  | noncoding | -0. 0290816 | 9000  | 9153  | 14934 |
| MSTRG. 28488. 8  | noncoding | -0. 0159744 | 45654 | 46131 | 56960 |

|                |           |            |       |       |       |
|----------------|-----------|------------|-------|-------|-------|
| MSTRG.28488.9  | noncoding | -0.047104  | 1125  | 1287  | 41772 |
| MSTRG.28488.10 | noncoding | -0.0057344 | 8484  | 8613  | 36069 |
| MSTRG.28488.11 | noncoding | -0.0507904 | 10110 | 10374 | 15024 |
| MSTRG.28491.1  | noncoding | -0.0126976 | 438   | 810   | 2030  |
| MSTRG.28492.1  | noncoding | -0.049152  | 36    | 138   | 486   |
| MSTRG.28495.1  | noncoding | -0.004096  | 1923  | 2016  | 2523  |
| MSTRG.28495.2  | noncoding | -0.049152  | 1590  | 1632  | 2085  |
| MSTRG.28499.3  | coding    | 0.415      | 261   | 1014  | 2516  |
| MSTRG.28501.3  | coding    | 0.31       | 0     | 984   | 4205  |
| MSTRG.28501.4  | noncoding | -0.0233472 | 315   | 474   | 3967  |
| MSTRG.28502.1  | noncoding | -0.188416  | 78    | 99    | 255   |
| MSTRG.28505.3  | coding    | 0.338      | 228   | 1029  | 1598  |
| MSTRG.28509.4  | noncoding | -0.1073152 | 1122  | 1461  | 1680  |
| MSTRG.28509.5  | coding    | 0.359      | 1707  | 2004  | 2225  |
| MSTRG.28509.2  | coding    | 0.286      | 183   | 636   | 855   |
| MSTRG.28509.3  | noncoding | -0.1073152 | 3540  | 3879  | 4100  |
| MSTRG.28510.1  | noncoding | -0.06144   | 504   | 627   | 782   |
| MSTRG.28514.5  | coding    | 0.239      | 630   | 6786  | 6959  |
| MSTRG.28515.1  | coding    | 0.07       | 249   | 744   | 2086  |
| MSTRG.28515.2  | coding    | 0.07       | 336   | 831   | 1918  |
| MSTRG.28515.3  | coding    | 0.07       | 333   | 828   | 1222  |
| MSTRG.28517.1  | noncoding | -0.0098304 | 6     | 261   | 850   |
| MSTRG.28517.2  | noncoding | -0.0688128 | 0     | 312   | 565   |
| MSTRG.28517.3  | noncoding | -0.0049152 | 72    | 330   | 886   |
| MSTRG.28517.4  | noncoding | -0.0049152 | 198   | 441   | 795   |
| MSTRG.28517.5  | noncoding | -0.0098304 | 6     | 246   | 464   |
| MSTRG.28520.2  | noncoding | -0.0864256 | 1377  | 1809  | 1965  |
| MSTRG.28522.2  | coding    | 0.239      | 5949  | 6555  | 9588  |
| MSTRG.28522.3  | coding    | 0.207      | 0     | 1053  | 4100  |
| MSTRG.28522.4  | coding    | 0.198      | 0     | 930   | 3965  |
| MSTRG.28522.6  | coding    | 0.179      | 978   | 1791  | 4838  |
| MSTRG.28522.8  | coding    | 0.205      | 471   | 1257  | 4298  |
| MSTRG.28525.2  | coding    | 0.05       | 162   | 1275  | 2711  |
| MSTRG.28525.3  | coding    | 0.252      | 3447  | 3948  | 4257  |
| MSTRG.28532.3  | coding    | 0.127      | 372   | 774   | 2811  |
| MSTRG.28532.5  | noncoding | -0.0708608 | 189   | 381   | 2393  |
| MSTRG.28533.1  | noncoding | -0.0004096 | 2373  | 2571  | 3745  |
| MSTRG.28538.2  | coding    | 0.521      | 72    | 8496  | 9064  |
| MSTRG.28546.1  | coding    | 0.127      | 381   | 2445  | 2971  |
| MSTRG.28546.2  | noncoding | -0.0741376 | 1203  | 1485  | 1638  |
| MSTRG.28546.3  | coding    | 0.063      | 351   | 1515  | 2479  |
| MSTRG.28546.4  | noncoding | -0.0684032 | 2106  | 2352  | 2508  |
| MSTRG.28546.12 | coding    | 0.054      | 42    | 1074  | 3368  |
| MSTRG.28546.10 | coding    | 0.059      | 42    | 1086  | 2264  |
| MSTRG.28546.8  | coding    | 0.063      | 42    | 1206  | 1733  |
| MSTRG.28539.2  | coding    | 0.479      | 90    | 6438  | 9168  |
| MSTRG.28539.3  | coding    | 0.533      | 129   | 5550  | 8279  |
| MSTRG.28539.5  | coding    | 0.519      | 0     | 5604  | 8332  |
| MSTRG.28539.6  | coding    | 0.493      | 477   | 6459  | 8600  |
| MSTRG.28539.7  | coding    | 0.479      | 90    | 6435  | 8561  |
| MSTRG.28539.8  | coding    | 0.469      | 90    | 6597  | 7258  |
| MSTRG.28550.3  | noncoding | -0.0950272 | 0     | 474   | 4269  |
| MSTRG.28551.1  | noncoding | -0.0561152 | 2130  | 2811  | 4331  |
| MSTRG.28552.1  | noncoding | -0.0380928 | 408   | 993   | 1321  |

|                  |           |             |       |       |       |
|------------------|-----------|-------------|-------|-------|-------|
| MSTRG. 28553. 1  | noncoding | -0. 038912  | 1353  | 1842  | 3225  |
| MSTRG. 28554. 1  | noncoding | -0. 0843776 | 6543  | 6801  | 7008  |
| MSTRG. 28555. 2  | noncoding | -0. 0638976 | 159   | 417   | 1134  |
| MSTRG. 28555. 3  | noncoding | -0. 057344  | 159   | 450   | 879   |
| MSTRG. 28556. 1  | noncoding | -0. 067584  | 354   | 564   | 2489  |
| MSTRG. 28557. 1  | noncoding | -0. 04096   | 162   | 630   | 2533  |
| MSTRG. 28555. 4  | noncoding | -0. 0372736 | 120   | 462   | 619   |
| MSTRG. 28559. 1  | noncoding | -0. 0524288 | 372   | 561   | 922   |
| MSTRG. 28561. 3  | coding    | 0. 191      | 477   | 1629  | 5542  |
| MSTRG. 28563. 1  | coding    | 0. 539      | 153   | 1938  | 3331  |
| MSTRG. 28563. 5  | coding    | 0. 555      | 417   | 2016  | 2171  |
| MSTRG. 28564. 1  | coding    | 0. 123      | 1248  | 1491  | 5853  |
| MSTRG. 28565. 1  | noncoding | -0. 0004096 | 396   | 522   | 895   |
| MSTRG. 28566. 1  | noncoding | -0. 0233472 | 2415  | 2595  | 5343  |
| MSTRG. 28567. 1  | noncoding | -0. 0004096 | 1842  | 1974  | 2589  |
| MSTRG. 28568. 1  | noncoding | -0. 0331776 | 207   | 255   | 552   |
| MSTRG. 28571. 2  | noncoding | -0. 0811008 | 1221  | 1818  | 2312  |
| MSTRG. 28571. 3  | noncoding | -0. 0602112 | 15    | 294   | 1290  |
| MSTRG. 28572. 1  | noncoding | -0. 0421888 | 75    | 504   | 659   |
| MSTRG. 28579. 2  | coding    | 0. 533      | 0     | 1911  | 4670  |
| MSTRG. 28586. 1  | coding    | 0. 656      | 0     | 1773  | 2010  |
| MSTRG. 28586. 3  | coding    | 0. 686      | 0     | 1686  | 1919  |
| MSTRG. 28586. 4  | coding    | 0. 698      | 0     | 1317  | 1552  |
| MSTRG. 28586. 5  | coding    | 0. 703      | 0     | 1311  | 1548  |
| MSTRG. 28587. 2  | coding    | 0. 301      | 57    | 642   | 1007  |
| MSTRG. 28587. 3  | coding    | 0. 183      | 393   | 1143  | 1507  |
| MSTRG. 28588. 1  | coding    | 0. 111      | 10527 | 11232 | 16784 |
| MSTRG. 28590. 1  | noncoding | -0. 065536  | 0     | 36    | 205   |
| MSTRG. 28588. 2  | noncoding | -0. 0618496 | 0     | 87    | 5470  |
| MSTRG. 28594. 2  | coding    | 0. 277      | 270   | 1239  | 1395  |
| MSTRG. 28581. 2  | coding    | 0. 524      | 0     | 1425  | 6430  |
| MSTRG. 28585. 1  | coding    | 0. 426      | 39    | 486   | 640   |
| MSTRG. 28595. 1  | noncoding | -0. 0462848 | 0     | 120   | 525   |
| MSTRG. 28600. 2  | coding    | 0. 517      | 0     | 390   | 1644  |
| MSTRG. 28600. 3  | coding    | 0. 555      | 0     | 750   | 2211  |
| MSTRG. 28600. 6  | coding    | 0. 351      | 0     | 900   | 5828  |
| MSTRG. 28600. 5  | coding    | 0. 401      | 0     | 1194  | 1975  |
| MSTRG. 28600. 4  | coding    | 0. 425      | 0     | 1194  | 3107  |
| MSTRG. 28600. 7  | coding    | 0. 334      | 4866  | 5250  | 5803  |
| MSTRG. 28600. 8  | coding    | 0. 412      | 21    | 726   | 1459  |
| MSTRG. 28600. 9  | coding    | 0. 452      | 0     | 996   | 1666  |
| MSTRG. 28602. 1  | noncoding | -0. 0806912 | 51    | 63    | 229   |
| MSTRG. 28603. 1  | noncoding | -0. 0577536 | 6354  | 6888  | 11523 |
| MSTRG. 28604. 1  | noncoding | -0. 176128  | 198   | 264   | 625   |
| MSTRG. 28605. 1  | noncoding | -0. 0897024 | 132   | 504   | 1377  |
| MSTRG. 28606. 1  | noncoding | -0. 1093632 | 1674  | 2217  | 3136  |
| MSTRG. 28597. 1  | noncoding | -0. 022528  | 714   | 1119  | 1274  |
| MSTRG. 28613. 7  | coding    | 0. 216      | 0     | 1764  | 3875  |
| MSTRG. 28613. 6  | coding    | 0. 227      | 0     | 3021  | 3177  |
| MSTRG. 28613. 8  | coding    | 0. 226      | 0     | 2118  | 9251  |
| MSTRG. 28613. 9  | coding    | 0. 226      | 0     | 2118  | 9449  |
| MSTRG. 28613. 10 | noncoding | -0. 0057344 | 1731  | 1899  | 3194  |
| MSTRG. 28614. 1  | noncoding | -0. 0651264 | 2166  | 2529  | 3257  |
| MSTRG. 28609. 1  | noncoding | -0. 0651264 | 357   | 363   | 545   |

|               |           |            |      |      |       |
|---------------|-----------|------------|------|------|-------|
| MSTRG.28618.1 | noncoding | -0.0618496 | 153  | 465  | 1047  |
| MSTRG.28620.4 | coding    | 0.198      | 0    | 3315 | 4296  |
| MSTRG.28620.3 | coding    | 0.193      | 168  | 3411 | 4394  |
| MSTRG.28623.2 | coding    | 0.201      | 0    | 1203 | 2901  |
| MSTRG.28625.1 | coding    | 0.393      | 297  | 585  | 870   |
| MSTRG.28625.2 | coding    | 0.37       | 0    | 513  | 3363  |
| MSTRG.28625.3 | coding    | 0.438      | 0    | 507  | 794   |
| MSTRG.28625.4 | coding    | 0.393      | 291  | 579  | 864   |
| MSTRG.28627.4 | coding    | 0.512      | 651  | 3150 | 3796  |
| MSTRG.28627.3 | coding    | 0.513      | 15   | 2868 | 3514  |
| MSTRG.28627.5 | coding    | 0.505      | 0    | 2628 | 3272  |
| MSTRG.28628.1 | noncoding | -0.083968  | 0    | 681  | 836   |
| MSTRG.28631.2 | noncoding | -0.0638976 | 219  | 1239 | 1485  |
| MSTRG.28631.3 | noncoding | -0.0233472 | 6189 | 8097 | 19957 |
| MSTRG.28633.1 | noncoding | -0.008192  | 222  | 360  | 710   |
| MSTRG.28642.2 | coding    | 0.372      | 93   | 5733 | 6555  |
| MSTRG.28642.8 | coding    | 0.358      | 2025 | 5826 | 5980  |
| MSTRG.28642.7 | coding    | 0.355      | 4947 | 8790 | 8945  |
| MSTRG.28642.5 | coding    | 0.352      | 2952 | 7647 | 7803  |
| MSTRG.28642.6 | coding    | 0.35       | 4197 | 8979 | 9134  |
| MSTRG.28642.3 | coding    | 0.349      | 3186 | 7923 | 8079  |
| MSTRG.28638.1 | noncoding | -0.0004096 | 57   | 165  | 450   |
| MSTRG.28638.2 | noncoding | -0.0004096 | 57   | 156  | 795   |
| MSTRG.28644.1 | coding    | 0.017      | 7548 | 8034 | 10359 |
| MSTRG.28645.2 | coding    | 0.457      | 168  | 3408 | 7359  |
| MSTRG.28646.3 | noncoding | -0.13312   | 0    | 177  | 617   |
| MSTRG.28646.4 | noncoding | -0.0401408 | 186  | 357  | 512   |
| MSTRG.28646.5 | noncoding | -0.0917504 | 0    | 300  | 559   |
| MSTRG.28647.1 | noncoding | -0.04096   | 4356 | 4539 | 5219  |
| MSTRG.28648.1 | noncoding | -0.0864256 | 216  | 684  | 1029  |
| MSTRG.28648.2 | noncoding | -0.0864256 | 216  | 684  | 1213  |
| MSTRG.28648.3 | noncoding | -0.0221184 | 219  | 402  | 928   |
| MSTRG.28650.1 | noncoding | -0.04096   | 177  | 258  | 1046  |
| MSTRG.28650.3 | noncoding | -0.0241664 | 120  | 150  | 457   |
| MSTRG.28650.2 | noncoding | -0.04096   | 60   | 141  | 629   |
| MSTRG.28652.1 | noncoding | -0.0159744 | 18   | 96   | 369   |
| MSTRG.28653.1 | coding    | 0.593      | 0    | 3144 | 4627  |
| MSTRG.28654.1 | noncoding | -0.016384  | 1575 | 1590 | 1767  |
| MSTRG.28656.1 | noncoding | -0.0589824 | 45   | 96   | 252   |
| MSTRG.28657.3 | coding    | 0.292      | 9    | 6933 | 7770  |
| MSTRG.28658.1 | noncoding | -0.004096  | 768  | 900  | 1054  |
| MSTRG.28662.4 | coding    | 0.507      | 957  | 2637 | 3001  |
| MSTRG.28662.3 | coding    | 0.534      | 0    | 1623 | 1986  |
| MSTRG.28661.1 | noncoding | -0.014336  | 177  | 339  | 740   |
| MSTRG.28661.2 | noncoding | -0.0835584 | 0    | 147  | 405   |
| MSTRG.28663.1 | coding    | 0.096      | 981  | 1488 | 2607  |
| MSTRG.28663.2 | coding    | 0.096      | 1119 | 1626 | 2743  |
| MSTRG.28669.2 | noncoding | -0.0585728 | 1638 | 2457 | 2650  |
| MSTRG.28672.1 | noncoding | -0.0233472 | 42   | 327  | 859   |
| MSTRG.28672.2 | noncoding | -0.008192  | 219  | 360  | 593   |
| MSTRG.28672.3 | noncoding | -0.008192  | 261  | 402  | 637   |
| MSTRG.28677.1 | noncoding | -0.0090112 | 138  | 294  | 865   |
| MSTRG.28677.2 | noncoding | -0.032768  | 36   | 120  | 286   |
| MSTRG.28682.2 | coding    | 0.149      | 0    | 6447 | 6897  |

|                 |           |             |       |       |       |
|-----------------|-----------|-------------|-------|-------|-------|
| MSTRG. 28688. 2 | coding    | 0. 401      | 42    | 318   | 2314  |
| MSTRG. 28693. 1 | noncoding | -0. 0004096 | 0     | 0     | 344   |
| MSTRG. 28702. 1 | noncoding | -0. 008192  | 96    | 159   | 445   |
| MSTRG. 28705. 1 | noncoding | -0. 0004096 | 0     | 0     | 395   |
| MSTRG. 28707. 1 | noncoding | -0. 018432  | 39    | 354   | 1129  |
| MSTRG. 28712. 2 | noncoding | -0. 1175552 | 0     | 279   | 433   |
| MSTRG. 28712. 3 | noncoding | -0. 006144  | 69    | 192   | 347   |
| MSTRG. 28714. 1 | noncoding | -0. 0004096 | 0     | 0     | 323   |
| MSTRG. 28716. 1 | noncoding | -0. 012288  | 219   | 351   | 1318  |
| MSTRG. 28718. 2 | coding    | 0. 076      | 9     | 2259  | 3307  |
| MSTRG. 28715. 1 | noncoding | -0. 0217088 | 0     | 15    | 320   |
| MSTRG. 28720. 1 | coding    | 0. 084      | 0     | 174   | 341   |
| MSTRG. 28731. 1 | noncoding | -0. 1011712 | 0     | 3     | 676   |
| MSTRG. 28732. 1 | noncoding | -0. 0196608 | 243   | 306   | 591   |
| MSTRG. 28742. 4 | coding    | 0. 098      | 705   | 1839  | 1992  |
| MSTRG. 28743. 1 | noncoding | -0. 1265664 | 81    | 102   | 866   |
| MSTRG. 28744. 1 | noncoding | -0. 075776  | 2721  | 3255  | 4896  |
| MSTRG. 28745. 1 | coding    | 0. 173      | 0     | 1047  | 1965  |
| MSTRG. 28745. 3 | coding    | 0. 254      | 510   | 903   | 2595  |
| MSTRG. 28745. 5 | coding    | 0. 227      | 3234  | 3900  | 5836  |
| MSTRG. 28746. 1 | coding    | 0. 339      | 1035  | 4626  | 6484  |
| MSTRG. 28746. 3 | coding    | 0. 341      | 1035  | 5031  | 5594  |
| MSTRG. 28746. 4 | noncoding | -0. 1359872 | 0     | 219   | 669   |
| MSTRG. 28746. 5 | coding    | 0. 428      | 1029  | 1677  | 2175  |
| MSTRG. 28737. 2 | coding    | 0. 039      | 0     | 2016  | 2732  |
| MSTRG. 28737. 3 | coding    | 0. 09       | 402   | 1734  | 2292  |
| MSTRG. 28739. 3 | coding    | 0. 261      | 0     | 390   | 4338  |
| MSTRG. 28739. 4 | coding    | 0. 261      | 0     | 390   | 1286  |
| MSTRG. 28739. 5 | noncoding | -0. 02048   | 14292 | 14412 | 17791 |
| MSTRG. 28739. 6 | noncoding | -0. 0118784 | 2313  | 2439  | 4435  |
| MSTRG. 28740. 1 | noncoding | -0. 028672  | 306   | 426   | 1105  |
| MSTRG. 28755. 1 | noncoding | -0. 036864  | 174   | 282   | 550   |
| MSTRG. 28765. 1 | noncoding | -0. 0557056 | 2241  | 2460  | 2615  |
| MSTRG. 28770. 1 | coding    | 0. 115      | 216   | 1149  | 8504  |
| MSTRG. 28770. 3 | coding    | 0. 115      | 363   | 1296  | 8509  |
| MSTRG. 28780. 1 | coding    | 0. 197      | 1011  | 2352  | 4045  |
| MSTRG. 28780. 3 | coding    | 0. 197      | 255   | 1638  | 3330  |
| MSTRG. 28784. 1 | coding    | 0. 192      | 555   | 7089  | 10879 |
| MSTRG. 28784. 2 | coding    | 0. 192      | 69    | 6579  | 8358  |
| MSTRG. 28783. 1 | noncoding | -0. 008192  | 3     | 48    | 1753  |
| MSTRG. 28790. 1 | noncoding | -0. 057344  | 6     | 39    | 401   |
| MSTRG. 28790. 2 | noncoding | -0. 1056768 | 165   | 237   | 444   |
| MSTRG. 28794. 1 | noncoding | -0. 045056  | 279   | 288   | 444   |
| MSTRG. 28799. 2 | coding    | 0. 212      | 48    | 3252  | 5167  |
| MSTRG. 28822. 1 | noncoding | -0. 0139264 | 2916  | 3066  | 4929  |
| MSTRG. 28830. 1 | noncoding | -0. 008192  | 75    | 147   | 429   |
| MSTRG. 28839. 1 | coding    | 0. 144      | 0     | 2532  | 3217  |
| MSTRG. 28839. 2 | coding    | 0. 144      | 0     | 2532  | 4138  |
| MSTRG. 28839. 4 | noncoding | -0. 069632  | 21    | 723   | 2507  |
| MSTRG. 28842. 1 | noncoding | -0. 0159744 | 3339  | 3489  | 6646  |
| MSTRG. 28844. 6 | coding    | 0. 144      | 318   | 1452  | 3165  |
| MSTRG. 28844. 5 | coding    | 0. 129      | 318   | 1347  | 4389  |
| MSTRG. 28846. 3 | noncoding | -0. 1077248 | 3447  | 3795  | 3948  |
| MSTRG. 28853. 2 | coding    | 0. 149      | 324   | 3099  | 5406  |



|                |           |            |       |       |       |
|----------------|-----------|------------|-------|-------|-------|
| MSTRG.28853.3  | coding    | 0.151      | 36    | 2922  | 10071 |
| MSTRG.28853.5  | coding    | 0.149      | 312   | 3087  | 3800  |
| MSTRG.28853.6  | coding    | 0.141      | 1725  | 1935  | 2602  |
| MSTRG.28854.1  | noncoding | -0.032768  | 120   | 159   | 597   |
| MSTRG.28853.10 | noncoding | -0.069632  | 450   | 504   | 1505  |
| MSTRG.28853.9  | coding    | 0.195      | 87    | 1710  | 3265  |
| MSTRG.28856.1  | noncoding | -0.0421888 | 3246  | 3474  | 6351  |
| MSTRG.28857.6  | coding    | 0.159      | 435   | 1356  | 1607  |
| MSTRG.28857.5  | coding    | 0.199      | 441   | 1674  | 1828  |
| MSTRG.28857.8  | coding    | 0.206      | 441   | 1593  | 2436  |
| MSTRG.28857.7  | coding    | 0.161      | 0     | 906   | 1158  |
| MSTRG.28858.2  | coding    | 0.238      | 0     | 714   | 4140  |
| MSTRG.28859.1  | noncoding | -0.0376832 | 5520  | 5895  | 13264 |
| MSTRG.28862.2  | coding    | 0.192      | 1854  | 10908 | 11292 |
| MSTRG.28862.3  | coding    | 0.195      | 3735  | 12648 | 12975 |
| MSTRG.28862.4  | coding    | 0.2        | 207   | 6507  | 6829  |
| MSTRG.28862.5  | coding    | 0.193      | 1059  | 10449 | 10742 |
| MSTRG.28862.6  | coding    | 0.208      | 4278  | 10509 | 10801 |
| MSTRG.28862.7  | coding    | 0.111      | 54    | 663   | 965   |
| MSTRG.28860.2  | coding    | 0.079      | 1980  | 2379  | 4033  |
| MSTRG.28866.2  | coding    | 0.066      | 231   | 2520  | 3185  |
| MSTRG.28866.3  | noncoding | -0.02048   | 201   | 252   | 887   |
| MSTRG.28869.1  | noncoding | -0.0004096 | 0     | 0     | 364   |
| MSTRG.28879.1  | coding    | 0.079      | 174   | 639   | 4309  |
| MSTRG.28879.4  | noncoding | -0.045056  | 510   | 639   | 878   |
| MSTRG.28879.3  | noncoding | -0.0671744 | 0     | 258   | 1167  |
| MSTRG.28879.5  | noncoding | -0.0925696 | 0     | 366   | 1041  |
| MSTRG.28880.1  | coding    | 0.206      | 19068 | 19518 | 23001 |
| MSTRG.28880.3  | noncoding | -0.090112  | 3075  | 3552  | 4098  |
| MSTRG.28880.2  | noncoding | -0.090112  | 5379  | 5856  | 6403  |
| MSTRG.28880.4  | coding    | 0.068      | 2064  | 2601  | 3798  |
| MSTRG.28882.1  | noncoding | -0.0229376 | 1740  | 1947  | 3915  |
| MSTRG.28883.1  | noncoding | -0.008192  | 2679  | 3087  | 6184  |
| MSTRG.28884.1  | noncoding | -0.0528384 | 945   | 987   | 1592  |
| MSTRG.28885.2  | noncoding | -0.0503808 | 279   | 555   | 709   |
| MSTRG.28885.3  | coding    | 0.053      | 105   | 465   | 636   |
| MSTRG.28886.2  | coding    | 0.136      | 453   | 2934  | 4773  |
| MSTRG.28887.1  | coding    | 0.107      | 327   | 1911  | 5270  |
| MSTRG.28887.2  | coding    | 0.083      | 417   | 1659  | 4620  |
| MSTRG.28887.4  | coding    | 0.083      | 678   | 1920  | 5281  |
| MSTRG.28888.1  | coding    | 0.08       | 171   | 2406  | 3733  |
| MSTRG.28873.1  | noncoding | -0.1376256 | 0     | 72    | 1034  |
| MSTRG.28876.1  | coding    | 0.132      | 240   | 1263  | 2310  |
| MSTRG.28890.1  | coding    | 0.326      | 0     | 930   | 2317  |
| MSTRG.28890.5  | coding    | 0.341      | 0     | 909   | 1237  |
| MSTRG.28890.6  | coding    | 0.342      | 0     | 900   | 1673  |
| MSTRG.28890.4  | coding    | 0.341      | 0     | 909   | 1336  |
| MSTRG.28890.3  | coding    | 0.341      | 0     | 909   | 3496  |
| MSTRG.28893.1  | noncoding | -0.032768  | 1533  | 1539  | 2316  |
| MSTRG.28892.2  | coding    | 0.078      | 0     | 879   | 4454  |
| MSTRG.28894.1  | noncoding | -0.14336   | 558   | 618   | 891   |
| MSTRG.28894.2  | noncoding | -0.0004096 | 0     | 0     | 288   |
| MSTRG.28900.3  | coding    | 0.039      | 594   | 846   | 2576  |
| MSTRG.28905.2  | coding    | 0.413      | 0     | 2646  | 5529  |

|                  |           |             |       |       |       |
|------------------|-----------|-------------|-------|-------|-------|
| MSTRG. 28907. 1  | coding    | 0. 257      | 84    | 579   | 1026  |
| MSTRG. 28908. 1  | noncoding | -0. 0258048 | 2757  | 2961  | 3116  |
| MSTRG. 28914. 1  | noncoding | -0. 1552384 | 78    | 432   | 3311  |
| MSTRG. 28914. 2  | coding    | 0. 446      | 843   | 3708  | 3862  |
| MSTRG. 28914. 3  | coding    | 0. 38       | 243   | 1314  | 1910  |
| MSTRG. 28917. 1  | noncoding | -0. 0012288 | 675   | 807   | 1673  |
| MSTRG. 28920. 1  | noncoding | -0. 04096   | 3030  | 3129  | 4777  |
| MSTRG. 28923. 4  | coding    | 0. 359      | 0     | 2550  | 3791  |
| MSTRG. 28923. 3  | coding    | 0. 341      | 12    | 2883  | 4124  |
| MSTRG. 28923. 5  | coding    | 0. 344      | 12    | 2829  | 4060  |
| MSTRG. 28923. 7  | coding    | 0. 34       | 0     | 2778  | 3969  |
| MSTRG. 28923. 6  | coding    | 0. 334      | 0     | 2973  | 4164  |
| MSTRG. 28923. 8  | coding    | 0. 345      | 0     | 2607  | 3795  |
| MSTRG. 28934. 1  | noncoding | -0. 0294912 | 4665  | 4824  | 7655  |
| MSTRG. 28935. 1  | noncoding | -0. 014336  | 9939  | 10062 | 11437 |
| MSTRG. 28936. 1  | noncoding | -0. 024576  | 2640  | 2769  | 8304  |
| MSTRG. 28937. 1  | noncoding | -0. 192512  | 420   | 471   | 643   |
| MSTRG. 28933. 3  | noncoding | -0. 0421888 | 264   | 456   | 1647  |
| MSTRG. 28941. 1  | noncoding | -0. 0065536 | 2766  | 3339  | 5622  |
| MSTRG. 28942. 1  | noncoding | -0. 0446464 | 642   | 1182  | 6076  |
| MSTRG. 28940. 4  | coding    | 0. 361      | 129   | 2190  | 8013  |
| MSTRG. 28949. 2  | coding    | 0. 088      | 0     | 750   | 1128  |
| MSTRG. 28949. 4  | coding    | 0. 059      | 507   | 1071  | 1449  |
| MSTRG. 28951. 2  | noncoding | -0. 0577536 | 114   | 990   | 4502  |
| MSTRG. 28951. 1  | coding    | 0. 076      | 114   | 6912  | 9389  |
| MSTRG. 28951. 6  | coding    | 0. 113      | 0     | 1107  | 2448  |
| MSTRG. 28951. 5  | coding    | 0. 094      | 0     | 1176  | 3441  |
| MSTRG. 28952. 1  | noncoding | -0. 02048   | 267   | 300   | 3212  |
| MSTRG. 28953. 1  | noncoding | -0. 188416  | 1116  | 1155  | 1308  |
| MSTRG. 28947. 1  | coding    | 0. 445      | 54    | 1995  | 3256  |
| MSTRG. 28961. 6  | coding    | 0. 417      | 1362  | 4125  | 5066  |
| MSTRG. 28961. 8  | coding    | 0. 429      | 1974  | 4068  | 5007  |
| MSTRG. 28961. 4  | coding    | 0. 418      | 1893  | 4632  | 5572  |
| MSTRG. 28961. 5  | coding    | 0. 418      | 1917  | 4683  | 5623  |
| MSTRG. 28961. 3  | coding    | 0. 448      | 0     | 2778  | 3717  |
| MSTRG. 28961. 7  | coding    | 0. 445      | 0     | 2856  | 3797  |
| MSTRG. 28961. 10 | coding    | 0. 422      | 2460  | 5238  | 6118  |
| MSTRG. 28961. 12 | coding    | 0. 417      | 1260  | 3996  | 4876  |
| MSTRG. 28961. 9  | coding    | 0. 417      | 84    | 2943  | 3822  |
| MSTRG. 28961. 13 | noncoding | -0. 008192  | 675   | 798   | 1867  |
| MSTRG. 28961. 14 | noncoding | -0. 0004096 | 0     | 0     | 451   |
| MSTRG. 28961. 15 | noncoding | -0. 0004096 | 0     | 0     | 308   |
| MSTRG. 28961. 16 | noncoding | -0. 0004096 | 0     | 0     | 237   |
| MSTRG. 28963. 1  | coding    | 0. 086      | 555   | 1083  | 1826  |
| MSTRG. 28967. 1  | noncoding | -0. 0299008 | 471   | 723   | 1177  |
| MSTRG. 28975. 1  | noncoding | -0. 0294912 | 69    | 234   | 522   |
| MSTRG. 28980. 2  | coding    | 0. 112      | 25959 | 26358 | 26706 |
| MSTRG. 28976. 2  | coding    | 0. 327      | 0     | 1104  | 1589  |
| MSTRG. 28976. 3  | coding    | 0. 352      | 0     | 852   | 1336  |
| MSTRG. 28977. 1  | noncoding | -0. 012288  | 0     | 183   | 978   |
| MSTRG. 28976. 4  | noncoding | -0. 0503808 | 66    | 309   | 794   |
| MSTRG. 28987. 2  | coding    | 0. 138      | 306   | 810   | 6176  |
| MSTRG. 28988. 2  | coding    | 0. 312      | 33    | 2271  | 5079  |
| MSTRG. 28988. 3  | coding    | 0. 256      | 2142  | 4128  | 5809  |

|                  |           |             |      |       |       |
|------------------|-----------|-------------|------|-------|-------|
| MSTRG. 28990. 1  | coding    | 0. 129      | 2730 | 3123  | 3735  |
| MSTRG. 28988. 4  | coding    | 0. 396      | 33   | 801   | 1884  |
| MSTRG. 28988. 5  | coding    | 0. 118      | 771  | 2031  | 3239  |
| MSTRG. 28988. 6  | coding    | 0. 118      | 1482 | 2742  | 3950  |
| MSTRG. 28988. 8  | coding    | 0. 123      | 693  | 1857  | 2375  |
| MSTRG. 28988. 9  | coding    | 0. 123      | 1482 | 2646  | 3164  |
| MSTRG. 28988. 10 | coding    | 0. 098      | 0    | 1893  | 2170  |
| MSTRG. 28988. 11 | coding    | 0. 098      | 0    | 1917  | 2919  |
| MSTRG. 28988. 12 | coding    | 0. 134      | 693  | 1773  | 2241  |
| MSTRG. 28993. 2  | coding    | 0. 079      | 171  | 825   | 1110  |
| MSTRG. 28993. 3  | coding    | 0. 069      | 528  | 1179  | 1505  |
| MSTRG. 29016. 1  | noncoding | -0. 0888832 | 402  | 1137  | 1622  |
| MSTRG. 29017. 8  | coding    | 0. 045      | 327  | 1074  | 3450  |
| MSTRG. 29017. 9  | coding    | 0. 101      | 327  | 7551  | 9189  |
| MSTRG. 29017. 10 | coding    | 0. 045      | 312  | 1059  | 2494  |
| MSTRG. 29017. 12 | coding    | 0. 045      | 312  | 1059  | 1839  |
| MSTRG. 29017. 13 | coding    | 0. 045      | 312  | 1059  | 2573  |
| MSTRG. 29017. 11 | coding    | 0. 085      | 312  | 8652  | 9079  |
| MSTRG. 29000. 1  | noncoding | -0. 0528384 | 207  | 426   | 1616  |
| MSTRG. 29008. 1  | noncoding | -0. 0229376 | 6099 | 6240  | 11721 |
| MSTRG. 29009. 1  | noncoding | -0. 0290816 | 9720 | 10155 | 17512 |
| MSTRG. 29013. 3  | noncoding | -0. 0094208 | 5838 | 6060  | 6255  |
| MSTRG. 28996. 1  | coding    | 0. 567      | 0    | 126   | 1064  |
| MSTRG. 29020. 2  | coding    | 0. 265      | 222  | 5019  | 9197  |
| MSTRG. 29020. 3  | coding    | 0. 248      | 1869 | 2721  | 2877  |
| MSTRG. 29021. 1  | noncoding | -0. 012288  | 1338 | 1443  | 3831  |
| MSTRG. 29022. 1  | noncoding | -0. 083968  | 0    | 84    | 330   |
| MSTRG. 29019. 1  | noncoding | -0. 057344  | 270  | 330   | 570   |
| MSTRG. 29024. 2  | noncoding | -0. 0192512 | 3501 | 4170  | 4604  |
| MSTRG. 29024. 4  | noncoding | -0. 0192512 | 3501 | 4170  | 4835  |
| MSTRG. 29028. 3  | coding    | 0. 166      | 201  | 7605  | 9290  |
| MSTRG. 29026. 3  | coding    | 0. 234      | 1740 | 2247  | 3940  |
| MSTRG. 29027. 1  | noncoding | -0. 032768  | 948  | 1125  | 1667  |
| MSTRG. 29029. 1  | coding    | 0. 138      | 0    | 723   | 1403  |
| MSTRG. 29034. 1  | noncoding | -0. 024576  | 1047 | 1155  | 2265  |
| MSTRG. 29035. 1  | coding    | 0. 541      | 555  | 2835  | 5913  |
| MSTRG. 29037. 1  | noncoding | -0. 0835584 | 0    | 351   | 1437  |
| MSTRG. 29041. 1  | noncoding | -0. 0131072 | 7749 | 8100  | 9124  |
| MSTRG. 29041. 5  | noncoding | -0. 0131072 | 966  | 1317  | 2906  |
| MSTRG. 29041. 4  | noncoding | -0. 0167936 | 1290 | 1611  | 3343  |
| MSTRG. 29041. 7  | noncoding | -0. 03072   | 27   | 387   | 2119  |
| MSTRG. 29043. 1  | noncoding | -0. 0618496 | 0    | 1182  | 1357  |
| MSTRG. 29043. 2  | coding    | 0. 195      | 0    | 990   | 1530  |
| MSTRG. 29043. 3  | noncoding | -0. 135168  | 0    | 423   | 1690  |
| MSTRG. 29045. 1  | coding    | 0. 267      | 102  | 1632  | 2259  |
| MSTRG. 29049. 4  | coding    | 0. 186      | 318  | 678   | 1562  |
| MSTRG. 29051. 2  | noncoding | -0. 0069632 | 132  | 279   | 547   |
| MSTRG. 29054. 4  | coding    | 0. 097      | 0    | 1323  | 9789  |
| MSTRG. 29054. 5  | coding    | 0. 076      | 147  | 1368  | 7184  |
| MSTRG. 29055. 1  | noncoding | -0. 0315392 | 4857 | 5025  | 9395  |
| MSTRG. 29064. 3  | coding    | 0. 448      | 0    | 1590  | 1750  |
| MSTRG. 29064. 4  | coding    | 0. 414      | 327  | 1389  | 5357  |
| MSTRG. 29064. 6  | coding    | 0. 43       | 87   | 1080  | 1241  |
| MSTRG. 29065. 1  | noncoding | -0. 0520192 | 504  | 1167  | 2233  |

|                |           |            |      |      |      |
|----------------|-----------|------------|------|------|------|
| MSTRG.29065.2  | noncoding | -0.004096  | 75   | 333  | 596  |
| MSTRG.29068.1  | noncoding | -0.047104  | 45   | 144  | 1459 |
| MSTRG.29068.3  | noncoding | -0.002048  | 987  | 1122 | 1277 |
| MSTRG.29079.2  | noncoding | -0.038912  | 0    | 150  | 449  |
| MSTRG.29079.1  | coding    | 0.536      | 54   | 5406 | 5703 |
| MSTRG.29079.4  | noncoding | -0.1024    | 396  | 495  | 651  |
| MSTRG.29079.3  | coding    | 0.536      | 0    | 5367 | 5718 |
| MSTRG.29079.5  | coding    | 0.533      | 0    | 5595 | 5864 |
| MSTRG.29080.1  | noncoding | -0.0335872 | 888  | 3150 | 4065 |
| MSTRG.29086.2  | coding    | 0.266      | 0    | 1488 | 3279 |
| MSTRG.29086.3  | coding    | 0.267      | 0    | 1275 | 3188 |
| MSTRG.29082.3  | coding    | 0.526      | 0    | 2196 | 2351 |
| MSTRG.29082.4  | coding    | 0.51       | 165  | 2292 | 2445 |
| MSTRG.29083.1  | noncoding | -0.047104  | 0    | 267  | 891  |
| MSTRG.29085.1  | coding    | 0.082      | 0    | 759  | 914  |
| MSTRG.29092.2  | coding    | 0.239      | 153  | 990  | 2760 |
| MSTRG.29092.6  | coding    | 0.239      | 291  | 1128 | 2898 |
| MSTRG.29092.7  | coding    | 0.239      | 582  | 1419 | 3187 |
| MSTRG.29092.5  | coding    | 0.239      | 390  | 1227 | 2996 |
| MSTRG.29093.4  | coding    | 0.068      | 720  | 1806 | 2179 |
| MSTRG.29094.1  | noncoding | -0.0823296 | 135  | 192  | 383  |
| MSTRG.29099.2  | coding    | 0.149      | 45   | 1173 | 3024 |
| MSTRG.29101.1  | coding    | 0.128      | 264  | 582  | 4052 |
| MSTRG.29101.2  | noncoding | -0.0139264 | 1665 | 1803 | 2917 |
| MSTRG.29107.1  | noncoding | -0.0057344 | 300  | 561  | 717  |
| MSTRG.29108.1  | noncoding | -0.0004096 | 0    | 0    | 276  |
| MSTRG.29111.3  | coding    | 0.436      | 0    | 663  | 2173 |
| MSTRG.29111.4  | coding    | 0.436      | 0    | 663  | 2297 |
| MSTRG.29111.2  | coding    | 0.395      | 0    | 741  | 2184 |
| MSTRG.29120.3  | noncoding | -0.0679936 | 2952 | 3144 | 3333 |
| MSTRG.29120.4  | noncoding | -0.0679936 | 1914 | 2106 | 2371 |
| MSTRG.29121.1  | noncoding | -0.0008192 | 4914 | 5190 | 8960 |
| MSTRG.29121.3  | coding    | 0.073      | 1869 | 3141 | 3914 |
| MSTRG.29113.1  | noncoding | -0.03072   | 66   | 249  | 1447 |
| MSTRG.29115.1  | noncoding | -0.0303104 | 66   | 105  | 854  |
| MSTRG.29128.1  | noncoding | -0.0069632 | 519  | 573  | 2216 |
| MSTRG.29129.1  | noncoding | -0.0090112 | 0    | 3    | 344  |
| MSTRG.29129.2  | noncoding | -0.012288  | 759  | 807  | 1069 |
| MSTRG.29130.1  | noncoding | -0.192512  | 249  | 309  | 2058 |
| MSTRG.29122.1  | noncoding | -0.26624   | 108  | 141  | 295  |
| MSTRG.29126.1  | noncoding | -0.0602112 | 0    | 99   | 256  |
| MSTRG.29133.1  | noncoding | -0.0421888 | 522  | 639  | 1023 |
| MSTRG.29136.2  | coding    | 0.206      | 207  | 4878 | 7348 |
| MSTRG.29136.5  | coding    | 0.213      | 0    | 5010 | 5244 |
| MSTRG.29136.1  | coding    | 0.213      | 207  | 4572 | 5822 |
| MSTRG.29137.1  | coding    | 0.011      | 279  | 444  | 653  |
| MSTRG.29155.4  | coding    | 0.273      | 402  | 3222 | 3418 |
| MSTRG.29155.6  | coding    | 0.273      | 564  | 3384 | 3580 |
| MSTRG.29155.1  | coding    | 0.271      | 468  | 3432 | 7941 |
| MSTRG.29155.8  | coding    | 0.272      | 390  | 3462 | 7971 |
| MSTRG.29155.11 | coding    | 0.265      | 387  | 2262 | 4079 |
| MSTRG.29155.15 | coding    | 0.314      | 672  | 1941 | 3083 |
| MSTRG.29155.16 | coding    | 0.273      | 399  | 3339 | 7850 |
| MSTRG.29155.17 | coding    | 0.27       | 114  | 3051 | 7521 |

|                  |           |             |      |      |      |
|------------------|-----------|-------------|------|------|------|
| MSTRG. 29155. 19 | coding    | 0. 328      | 0    | 1230 | 1490 |
| MSTRG. 29157. 1  | noncoding | -0. 098304  | 4557 | 5001 | 5860 |
| MSTRG. 29155. 22 | coding    | 0. 387      | 0    | 906  | 1166 |
| MSTRG. 29160. 1  | noncoding | -0. 0425984 | 1806 | 1914 | 3346 |
| MSTRG. 29161. 1  | noncoding | -0. 0004096 | 408  | 540  | 694  |
| MSTRG. 29142. 1  | noncoding | -0. 004096  | 411  | 678  | 3268 |
| MSTRG. 29143. 1  | noncoding | -0. 0724992 | 390  | 813  | 968  |
| MSTRG. 29144. 3  | coding    | 0. 187      | 1278 | 2598 | 4915 |
| MSTRG. 29149. 2  | coding    | 0. 469      | 489  | 4455 | 6079 |
| MSTRG. 29149. 8  | coding    | 0. 467      | 0    | 3345 | 4298 |
| MSTRG. 29149. 9  | coding    | 0. 194      | 696  | 1479 | 1825 |
| MSTRG. 29149. 10 | coding    | 0. 46       | 114  | 888  | 2511 |
| MSTRG. 29149. 11 | coding    | 0. 454      | 81   | 873  | 2496 |
| MSTRG. 29150. 1  | coding    | 0. 269      | 0    | 1389 | 4833 |
| MSTRG. 29150. 2  | coding    | 0. 27       | 0    | 1398 | 4001 |
| MSTRG. 29150. 3  | coding    | 0. 27       | 0    | 1398 | 3878 |
| MSTRG. 29150. 4  | coding    | 0. 257      | 0    | 1368 | 5515 |
| MSTRG. 29150. 5  | coding    | 0. 27       | 0    | 1398 | 2356 |
| MSTRG. 29150. 6  | coding    | 0. 269      | 0    | 1389 | 3858 |
| MSTRG. 29150. 7  | coding    | 0. 27       | 0    | 1398 | 3080 |
| MSTRG. 29150. 8  | coding    | 0. 27       | 0    | 1398 | 2011 |
| MSTRG. 29165. 3  | noncoding | -0. 083968  | 180  | 786  | 993  |
| MSTRG. 29162. 1  | noncoding | -0. 028672  | 255  | 354  | 668  |
| MSTRG. 29162. 2  | noncoding | -0. 012288  | 99   | 213  | 626  |
| MSTRG. 29163. 1  | noncoding | -0. 069632  | 249  | 267  | 626  |
| MSTRG. 29172. 1  | noncoding | -0. 077824  | 21   | 54   | 220  |
| MSTRG. 29191. 1  | noncoding | -0. 0782336 | 1809 | 2082 | 2448 |
| MSTRG. 29192. 1  | noncoding | -0. 2412544 | 0    | 66   | 1190 |
| MSTRG. 29195. 1  | noncoding | -0. 0479232 | 2238 | 2529 | 2685 |
| MSTRG. 29195. 2  | noncoding | -0. 0294912 | 558  | 759  | 1213 |
| MSTRG. 29195. 3  | noncoding | -0. 0376832 | 525  | 912  | 1066 |
| MSTRG. 29195. 4  | noncoding | -0. 0569344 | 45   | 417  | 1071 |
| MSTRG. 29201. 1  | noncoding | -0. 004096  | 42   | 54   | 232  |
| MSTRG. 29202. 4  | coding    | 0. 215      | 174  | 1884 | 5813 |
| MSTRG. 29202. 6  | coding    | 0. 142      | 0    | 1239 | 2782 |
| MSTRG. 29202. 7  | coding    | 0. 142      | 0    | 1239 | 3698 |
| MSTRG. 29202. 8  | coding    | 0. 05       | 363  | 1308 | 1591 |
| MSTRG. 29202. 9  | coding    | 0. 05       | 1152 | 1344 | 2937 |
| MSTRG. 29196. 1  | noncoding | -0. 114688  | 0    | 471  | 1362 |
| MSTRG. 29198. 1  | coding    | 0. 345      | 0    | 4059 | 8020 |
| MSTRG. 29198. 2  | coding    | 0. 323      | 0    | 2631 | 2786 |
| MSTRG. 29198. 4  | coding    | 0. 682      | 0    | 642  | 1939 |
| MSTRG. 29207. 2  | coding    | 0. 414      | 0    | 3891 | 4813 |
| MSTRG. 29207. 3  | coding    | 0. 425      | 0    | 3816 | 4738 |
| MSTRG. 29208. 1  | noncoding | -0. 0495616 | 24   | 27   | 221  |
| MSTRG. 29213. 1  | noncoding | -0. 04096   | 0    | 309  | 465  |
| MSTRG. 29214. 1  | noncoding | -0. 0131072 | 3186 | 3312 | 5338 |
| MSTRG. 29215. 1  | noncoding | -0. 0118784 | 393  | 558  | 875  |
| MSTRG. 29219. 1  | noncoding | -0. 012288  | 0    | 6    | 547  |
| MSTRG. 29231. 1  | noncoding | -0. 0008192 | 2910 | 3042 | 3275 |
| MSTRG. 29231. 2  | noncoding | -0. 0536576 | 3792 | 4053 | 4990 |
| MSTRG. 29229. 16 | noncoding | -0. 0761856 | 606  | 633  | 1313 |
| MSTRG. 29232. 1  | noncoding | -0. 0339968 | 36   | 186  | 1595 |
| MSTRG. 29232. 2  | noncoding | -0. 0602112 | 0    | 75   | 1106 |

|                 |           |             |      |       |       |
|-----------------|-----------|-------------|------|-------|-------|
| MSTRG. 29221. 2 | noncoding | -0. 0462848 | 219  | 489   | 643   |
| MSTRG. 29224. 2 | coding    | 0. 383      | 93   | 1044  | 1198  |
| MSTRG. 29226. 2 | coding    | 0. 512      | 0    | 390   | 559   |
| MSTRG. 29226. 3 | coding    | 0. 512      | 0    | 390   | 559   |
| MSTRG. 29233. 3 | coding    | 0. 243      | 456  | 1317  | 1581  |
| MSTRG. 29238. 2 | coding    | 0. 499      | 60   | 783   | 1117  |
| MSTRG. 29239. 3 | coding    | 0. 43       | 0    | 2169  | 2403  |
| MSTRG. 29240. 1 | coding    | 0. 306      | 24   | 531   | 922   |
| MSTRG. 29242. 2 | coding    | 0. 585      | 0    | 2256  | 3174  |
| MSTRG. 29242. 3 | coding    | 0. 585      | 0    | 2373  | 3294  |
| MSTRG. 29242. 5 | coding    | 0. 561      | 921  | 2748  | 3668  |
| MSTRG. 29242. 6 | coding    | 0. 561      | 18   | 1710  | 2629  |
| MSTRG. 29246. 3 | coding    | 0. 376      | 192  | 2520  | 3178  |
| MSTRG. 29257. 4 | coding    | 0. 474      | 0    | 186   | 627   |
| MSTRG. 29257. 2 | noncoding | -0. 0856064 | 99   | 531   | 800   |
| MSTRG. 29258. 1 | noncoding | -0. 0925696 | 180  | 846   | 1089  |
| MSTRG. 29258. 2 | coding    | 0. 246      | 0    | 594   | 838   |
| MSTRG. 29258. 4 | noncoding | -0. 0790528 | 153  | 729   | 974   |
| MSTRG. 29258. 5 | noncoding | -0. 0765952 | 147  | 699   | 943   |
| MSTRG. 29258. 6 | coding    | 0. 193      | 0    | 216   | 436   |
| MSTRG. 29258. 9 | noncoding | -0. 0733184 | 0    | 864   | 1017  |
| MSTRG. 29260. 1 | noncoding | -0. 0753664 | 0    | 810   | 1089  |
| MSTRG. 29262. 2 | noncoding | -0. 1093632 | 0    | 582   | 759   |
| MSTRG. 29254. 1 | coding    | 0. 318      | 0    | 2055  | 2443  |
| MSTRG. 29255. 4 | coding    | 0. 364      | 132  | 588   | 1200  |
| MSTRG. 29268. 1 | noncoding | -0. 0630784 | 159  | 615   | 941   |
| MSTRG. 29271. 3 | noncoding | -0. 0376832 | 228  | 2175  | 5891  |
| MSTRG. 29271. 5 | coding    | 0. 316      | 306  | 963   | 3889  |
| MSTRG. 29276. 1 | coding    | 0. 519      | 0    | 7566  | 7903  |
| MSTRG. 29276. 3 | coding    | 0. 518      | 0    | 7533  | 7870  |
| MSTRG. 29278. 1 | coding    | 0. 258      | 150  | 1197  | 1350  |
| MSTRG. 29278. 2 | coding    | 0. 289      | 213  | 1092  | 1248  |
| MSTRG. 29278. 3 | coding    | 0. 421      | 0    | 1014  | 1169  |
| MSTRG. 29279. 2 | coding    | 0. 381      | 0    | 492   | 648   |
| MSTRG. 29281. 3 | coding    | 0. 481      | 0    | 1989  | 4019  |
| MSTRG. 29282. 2 | coding    | 0. 536      | 339  | 2349  | 2504  |
| MSTRG. 29283. 2 | noncoding | -0. 0352256 | 3720 | 10968 | 11294 |
| MSTRG. 29283. 3 | noncoding | -0. 0311296 | 0    | 2235  | 2391  |
| MSTRG. 29283. 4 | noncoding | -0. 0282624 | 1125 | 8835  | 8989  |
| MSTRG. 29283. 5 | coding    | 0. 083      | 3    | 8565  | 8719  |
| MSTRG. 29301. 1 | noncoding | -0. 0978944 | 0    | 228   | 391   |
| MSTRG. 29302. 3 | coding    | 0. 649      | 1011 | 3186  | 3634  |
| MSTRG. 29302. 1 | coding    | 0. 525      | 0    | 4605  | 5053  |
| MSTRG. 29305. 2 | coding    | 0. 403      | 369  | 4062  | 7460  |
| MSTRG. 29305. 3 | coding    | 0. 385      | 2385 | 6363  | 9761  |
| MSTRG. 29307. 3 | noncoding | -0. 0811008 | 0    | 882   | 3337  |
| MSTRG. 29308. 4 | coding    | 0. 627      | 0    | 4134  | 5483  |
| MSTRG. 29308. 5 | coding    | 0. 54       | 3246 | 6930  | 8278  |
| MSTRG. 29308. 6 | coding    | 0. 581      | 618  | 3174  | 4652  |
| MSTRG. 29308. 7 | coding    | 0. 581      | 525  | 3081  | 4429  |
| MSTRG. 29293. 2 | coding    | 0. 366      | 369  | 1164  | 1345  |
| MSTRG. 29298. 1 | coding    | 0. 331      | 516  | 1569  | 1828  |
| MSTRG. 29325. 2 | coding    | 0. 55       | 0    | 2268  | 2500  |
| MSTRG. 29328. 7 | coding    | 0. 249      | 0    | 1080  | 1924  |

|                  |           |             |       |       |       |
|------------------|-----------|-------------|-------|-------|-------|
| MSTRG. 29328. 9  | coding    | 0. 224      | 573   | 1431  | 2275  |
| MSTRG. 29328. 8  | coding    | 0. 224      | 2079  | 2937  | 3782  |
| MSTRG. 29333. 2  | coding    | 0. 454      | 0     | 6159  | 6538  |
| MSTRG. 29334. 1  | coding    | 0. 287      | 1359  | 6234  | 6630  |
| MSTRG. 29334. 5  | noncoding | -0. 0319488 | 24    | 411   | 2525  |
| MSTRG. 29341. 3  | coding    | 0. 493      | 252   | 1143  | 1347  |
| MSTRG. 29342. 1  | coding    | 0. 265      | 1734  | 2730  | 7893  |
| MSTRG. 29342. 2  | coding    | 0. 271      | 126   | 1821  | 6986  |
| MSTRG. 29343. 1  | noncoding | -0. 0499712 | 1455  | 1683  | 8753  |
| MSTRG. 29342. 4  | coding    | 0. 258      | 6417  | 8238  | 13566 |
| MSTRG. 29356. 21 | coding    | 0. 255      | 1266  | 2193  | 7782  |
| MSTRG. 29356. 18 | coding    | 0. 278      | 1545  | 3042  | 10127 |
| MSTRG. 29356. 9  | coding    | 0. 263      | 405   | 1860  | 8945  |
| MSTRG. 29356. 12 | coding    | 0. 416      | 3207  | 4092  | 12087 |
| MSTRG. 29356. 13 | coding    | 0. 292      | 0     | 1599  | 8729  |
| MSTRG. 29356. 14 | coding    | 0. 294      | 0     | 1596  | 8684  |
| MSTRG. 29356. 16 | coding    | 0. 263      | 810   | 2265  | 9258  |
| MSTRG. 29356. 5  | coding    | 0. 292      | 0     | 1599  | 8705  |
| MSTRG. 29356. 6  | coding    | 0. 263      | 810   | 2265  | 9462  |
| MSTRG. 29356. 8  | coding    | 0. 263      | 810   | 2265  | 9369  |
| MSTRG. 29356. 15 | coding    | 0. 419      | 0     | 981   | 9090  |
| MSTRG. 29356. 19 | coding    | 0. 295      | 0     | 1611  | 8780  |
| MSTRG. 29356. 22 | coding    | 0. 416      | 3207  | 4092  | 12308 |
| MSTRG. 29356. 23 | coding    | 0. 294      | 0     | 1596  | 8602  |
| MSTRG. 29356. 24 | coding    | 0. 285      | 2580  | 4095  | 10937 |
| MSTRG. 29347. 1  | coding    | 0. 5        | 420   | 2271  | 4742  |
| MSTRG. 29353. 1  | noncoding | -0. 0806912 | 60    | 336   | 676   |
| MSTRG. 29354. 1  | coding    | 0. 321      | 0     | 354   | 1051  |
| MSTRG. 29359. 2  | coding    | 0. 372      | 771   | 1878  | 2708  |
| MSTRG. 29361. 1  | noncoding | -0. 0557056 | 0     | 84    | 653   |
| MSTRG. 29363. 1  | noncoding | -0. 004096  | 192   | 300   | 455   |
| MSTRG. 29364. 1  | noncoding | -0. 02048   | 66    | 153   | 963   |
| MSTRG. 29367. 2  | noncoding | -0. 13312   | 123   | 564   | 2772  |
| MSTRG. 29370. 2  | coding    | 0. 162      | 261   | 1704  | 8243  |
| MSTRG. 29375. 2  | coding    | 0. 269      | 102   | 636   | 2361  |
| MSTRG. 29376. 3  | noncoding | -0. 0950272 | 0     | 789   | 946   |
| MSTRG. 29387. 1  | coding    | 0. 34       | 354   | 5676  | 6727  |
| MSTRG. 29387. 6  | coding    | 0. 34       | 252   | 5574  | 6132  |
| MSTRG. 29389. 1  | coding    | 0. 504      | 0     | 2325  | 5873  |
| MSTRG. 29388. 6  | coding    | 0. 275      | 204   | 675   | 1043  |
| MSTRG. 29378. 1  | noncoding | -0. 028672  | 1317  | 1410  | 2275  |
| MSTRG. 29380. 1  | noncoding | -0. 034816  | 11652 | 11820 | 13384 |
| MSTRG. 29379. 3  | coding    | 0. 323      | 0     | 1698  | 2530  |
| MSTRG. 29393. 3  | noncoding | -0. 0823296 | 138   | 858   | 1013  |
| MSTRG. 29393. 2  | noncoding | -0. 0589824 | 168   | 777   | 1090  |
| MSTRG. 29393. 4  | noncoding | -0. 1183744 | 168   | 672   | 825   |
| MSTRG. 29393. 5  | noncoding | -0. 0782336 | 93    | 600   | 871   |
| MSTRG. 29393. 6  | noncoding | -0. 0847872 | 90    | 456   | 612   |
| MSTRG. 29393. 7  | noncoding | -0. 1036288 | 0     | 492   | 1349  |
| MSTRG. 29405. 2  | coding    | 0. 503      | 0     | 2853  | 3530  |
| MSTRG. 29409. 2  | coding    | 0. 411      | 87    | 780   | 934   |
| MSTRG. 29409. 3  | coding    | 0. 408      | 1680  | 2277  | 2430  |
| MSTRG. 29411. 1  | noncoding | -0. 07168   | 3228  | 4914  | 7708  |
| MSTRG. 29412. 1  | coding    | 0. 37       | 1734  | 5175  | 5365  |

|                 |           |             |      |      |      |
|-----------------|-----------|-------------|------|------|------|
| MSTRG. 29417. 3 | coding    | 0. 443      | 96   | 2112 | 2352 |
| MSTRG. 29417. 4 | coding    | 0. 439      | 96   | 2121 | 2332 |
| MSTRG. 29418. 4 | coding    | 0. 257      | 0    | 1752 | 2055 |
| MSTRG. 29420. 2 | coding    | 0. 406      | 5442 | 5865 | 6723 |
| MSTRG. 29420. 1 | coding    | 0. 406      | 837  | 1260 | 2118 |
| MSTRG. 29425. 2 | coding    | 0. 276      | 0    | 2256 | 3912 |
| MSTRG. 29425. 5 | coding    | 0. 252      | 0    | 2319 | 3972 |
| MSTRG. 29425. 6 | coding    | 0. 216      | 0    | 2445 | 4099 |
| MSTRG. 29425. 7 | coding    | 0. 315      | 1209 | 2682 | 4336 |
| MSTRG. 29426. 3 | coding    | 0. 259      | 1401 | 3600 | 4251 |
| MSTRG. 29426. 4 | coding    | 0. 294      | 0    | 3750 | 4400 |
| MSTRG. 29426. 5 | coding    | 0. 263      | 1401 | 3258 | 4250 |
| MSTRG. 29426. 6 | coding    | 0. 294      | 0    | 3753 | 4403 |
| MSTRG. 29395. 2 | coding    | 0. 388      | 0    | 792  | 1461 |
| MSTRG. 29404. 5 | coding    | 0. 44       | 153  | 927  | 1091 |
| MSTRG. 29404. 3 | coding    | 0. 4        | 276  | 885  | 1053 |
| MSTRG. 29404. 6 | coding    | 0. 421      | 318  | 1119 | 1287 |
| MSTRG. 29404. 7 | coding    | 0. 455      | 0    | 1134 | 1289 |
| MSTRG. 29428. 3 | coding    | 0. 375      | 189  | 1695 | 4848 |
| MSTRG. 29436. 3 | coding    | 0. 356      | 927  | 1509 | 3543 |
| MSTRG. 29432. 3 | coding    | 0. 285      | 114  | 3441 | 4215 |
| MSTRG. 29445. 1 | noncoding | -0. 0888832 | 885  | 1137 | 1290 |
| MSTRG. 29447. 1 | noncoding | -0. 0274432 | 822  | 1101 | 6658 |
| MSTRG. 29447. 2 | noncoding | -0. 016384  | 1683 | 1761 | 1916 |
| MSTRG. 29449. 1 | noncoding | -0. 012288  | 276  | 363  | 1952 |
| MSTRG. 29450. 1 | noncoding | -0. 0004096 | 0    | 0    | 1174 |
| MSTRG. 29447. 6 | noncoding | -0. 0221184 | 3213 | 3432 | 6613 |
| MSTRG. 29447. 7 | coding    | 0. 124      | 735  | 1968 | 3291 |
| MSTRG. 29440. 2 | coding    | 0. 546      | 651  | 1269 | 1472 |
| MSTRG. 29455. 4 | coding    | 0. 449      | 0    | 2916 | 6563 |
| MSTRG. 29455. 6 | coding    | 0. 448      | 15   | 2730 | 3327 |
| MSTRG. 29455. 7 | coding    | 0. 428      | 3645 | 4605 | 7656 |
| MSTRG. 29454. 1 | noncoding | -0. 0110592 | 195  | 348  | 643  |
| MSTRG. 29458. 1 | noncoding | -0. 141312  | 174  | 591  | 746  |
| MSTRG. 29457. 2 | noncoding | -0. 1024    | 0    | 414  | 607  |
| MSTRG. 29463. 1 | coding    | 0. 259      | 0    | 468  | 3327 |
| MSTRG. 29463. 7 | coding    | 0. 216      | 93   | 579  | 2007 |
| MSTRG. 29463. 6 | coding    | 0. 202      | 141  | 612  | 2039 |
| MSTRG. 29466. 1 | coding    | 0. 395      | 0    | 366  | 3247 |
| MSTRG. 29466. 3 | coding    | 0. 425      | 0    | 411  | 3291 |
| MSTRG. 29467. 2 | coding    | 0. 31       | 765  | 2640 | 2887 |
| MSTRG. 29467. 3 | coding    | 0. 282      | 0    | 2502 | 2657 |
| MSTRG. 29467. 4 | noncoding | -0. 049152  | 99   | 213  | 3401 |
| MSTRG. 29467. 5 | noncoding | -0. 028672  | 258  | 465  | 1640 |
| MSTRG. 29481. 2 | coding    | 0. 432      | 1218 | 2982 | 4901 |
| MSTRG. 29482. 2 | noncoding | -0. 0487424 | 1218 | 1470 | 2091 |
| MSTRG. 29481. 3 | coding    | 0. 425      | 33   | 1458 | 3375 |
| MSTRG. 29470. 1 | noncoding | -0. 008192  | 375  | 438  | 1068 |
| MSTRG. 29470. 2 | noncoding | -0. 110592  | 0    | 6    | 570  |
| MSTRG. 29471. 1 | coding    | 0. 329      | 0    | 468  | 4589 |
| MSTRG. 29484. 1 | noncoding | -0. 2883584 | 0    | 69   | 282  |
| MSTRG. 29495. 2 | coding    | 0. 253      | 0    | 2082 | 2682 |
| MSTRG. 29495. 3 | coding    | 0. 251      | 0    | 1932 | 3982 |
| MSTRG. 29497. 1 | coding    | 0. 24       | 0    | 2373 | 3903 |



|                  |           |             |       |       |       |
|------------------|-----------|-------------|-------|-------|-------|
| MSTRG. 29499. 4  | coding    | 0. 172      | 165   | 759   | 1198  |
| MSTRG. 29497. 4  | coding    | 0. 206      | 6     | 2427  | 4076  |
| MSTRG. 29497. 3  | coding    | 0. 219      | 24    | 2526  | 4177  |
| MSTRG. 29500. 1  | noncoding | -0. 008192  | 756   | 924   | 1196  |
| MSTRG. 29504. 3  | coding    | 0. 163      | 213   | 5175  | 7507  |
| MSTRG. 29504. 4  | coding    | 0. 163      | 180   | 5142  | 7473  |
| MSTRG. 29504. 2  | coding    | 0. 163      | 282   | 5244  | 7575  |
| MSTRG. 29506. 3  | noncoding | -0. 0724992 | 189   | 417   | 2750  |
| MSTRG. 29502. 2  | coding    | 0. 021      | 210   | 501   | 1118  |
| MSTRG. 29502. 3  | noncoding | -0. 0004096 | 0     | 120   | 1021  |
| MSTRG. 29502. 4  | noncoding | -0. 1314816 | 0     | 120   | 2295  |
| MSTRG. 29509. 1  | coding    | 0. 502      | 495   | 4998  | 6538  |
| MSTRG. 29509. 2  | coding    | 0. 473      | 495   | 5145  | 6685  |
| MSTRG. 29509. 3  | coding    | 0. 512      | 0     | 4611  | 8797  |
| MSTRG. 29511. 2  | coding    | 0. 363      | 546   | 1641  | 2007  |
| MSTRG. 29511. 3  | coding    | 0. 37       | 339   | 1506  | 1873  |
| MSTRG. 29511. 4  | coding    | 0. 381      | 354   | 1560  | 1926  |
| MSTRG. 29511. 5  | coding    | 0. 361      | 330   | 1422  | 1790  |
| MSTRG. 29513. 1  | noncoding | -0. 028672  | 63    | 120   | 603   |
| MSTRG. 29510. 1  | noncoding | -0. 0004096 | 9     | 9     | 299   |
| MSTRG. 29512. 1  | noncoding | -0. 233472  | 87    | 129   | 284   |
| MSTRG. 29521. 2  | coding    | 0. 089      | 0     | 810   | 995   |
| MSTRG. 29521. 3  | noncoding | -0. 0421888 | 0     | 120   | 2207  |
| MSTRG. 29521. 4  | coding    | 0. 088      | 192   | 10947 | 13473 |
| MSTRG. 29524. 1  | noncoding | -0. 0004096 | 0     | 0     | 847   |
| MSTRG. 29517. 1  | coding    | 0. 432      | 432   | 2325  | 7027  |
| MSTRG. 29525. 1  | coding    | 0. 324      | 0     | 567   | 894   |
| MSTRG. 29525. 3  | coding    | 0. 291      | 561   | 1014  | 1288  |
| MSTRG. 29525. 4  | coding    | 0. 323      | 171   | 639   | 903   |
| MSTRG. 29526. 1  | noncoding | -0. 0090112 | 105   | 306   | 825   |
| MSTRG. 29532. 5  | coding    | 0. 099      | 1779  | 2403  | 4681  |
| MSTRG. 29533. 5  | coding    | 0. 13       | 660   | 1071  | 1225  |
| MSTRG. 29533. 6  | coding    | 0. 107      | 357   | 807   | 961   |
| MSTRG. 29535. 2  | coding    | 0. 199      | 0     | 669   | 1454  |
| MSTRG. 29535. 3  | coding    | 0. 084      | 0     | 783   | 1570  |
| MSTRG. 29535. 5  | coding    | 0. 259      | 0     | 438   | 1531  |
| MSTRG. 29535. 4  | noncoding | -0. 0393216 | 456   | 654   | 1717  |
| MSTRG. 29536. 1  | coding    | 0. 514      | 0     | 1125  | 2660  |
| MSTRG. 29530. 1  | coding    | 0. 238      | 246   | 1950  | 2364  |
| MSTRG. 29530. 3  | coding    | 0. 324      | 2610  | 3267  | 3637  |
| MSTRG. 29531. 3  | coding    | 0. 197      | 357   | 1149  | 1513  |
| MSTRG. 29537. 3  | coding    | 0. 073      | 21039 | 21897 | 22168 |
| MSTRG. 29537. 4  | coding    | 0. 075      | 30    | 489   | 1782  |
| MSTRG. 29557. 1  | coding    | 0. 141      | 3426  | 3891  | 21443 |
| MSTRG. 29557. 2  | coding    | 0. 141      | 2544  | 3009  | 7315  |
| MSTRG. 29557. 3  | coding    | 0. 141      | 2511  | 2976  | 6842  |
| MSTRG. 29557. 4  | coding    | 0. 141      | 2661  | 3126  | 3905  |
| MSTRG. 29557. 5  | coding    | 0. 141      | 3270  | 3735  | 4515  |
| MSTRG. 29557. 6  | coding    | 0. 141      | 2640  | 3105  | 3884  |
| MSTRG. 29557. 7  | noncoding | -0. 053248  | 0     | 132   | 2670  |
| MSTRG. 29557. 8  | noncoding | -0. 053248  | 0     | 132   | 2630  |
| MSTRG. 29557. 10 | noncoding | -0. 008192  | 57    | 192   | 2644  |
| MSTRG. 29558. 5  | coding    | 0. 083      | 600   | 2409  | 2747  |
| MSTRG. 29558. 6  | noncoding | -0. 065536  | 513   | 600   | 868   |

|                  |           |             |       |       |       |
|------------------|-----------|-------------|-------|-------|-------|
| MSTRG. 29558. 7  | coding    | 0. 11       | 276   | 918   | 1255  |
| MSTRG. 29559. 3  | coding    | 0. 214      | 396   | 1266  | 1567  |
| MSTRG. 29559. 4  | coding    | 0. 214      | 531   | 1401  | 1702  |
| MSTRG. 29560. 1  | noncoding | -0. 0319488 | 3027  | 3117  | 3813  |
| MSTRG. 29561. 1  | coding    | 0. 106      | 525   | 666   | 2408  |
| MSTRG. 29565. 1  | coding    | 0. 256      | 303   | 12417 | 12611 |
| MSTRG. 29566. 1  | noncoding | -0. 004096  | 69    | 186   | 1395  |
| MSTRG. 29566. 2  | noncoding | -0. 0520192 | 246   | 462   | 5706  |
| MSTRG. 29567. 1  | noncoding | -0. 0241664 | 342   | 429   | 1554  |
| MSTRG. 29566. 3  | noncoding | -0. 004096  | 180   | 297   | 4149  |
| MSTRG. 29544. 1  | coding    | 0. 04       | 1734  | 1875  | 3448  |
| MSTRG. 29543. 2  | coding    | 0. 026      | 480   | 4242  | 4964  |
| MSTRG. 29545. 1  | noncoding | -0. 0004096 | 1026  | 1242  | 3196  |
| MSTRG. 29546. 1  | noncoding | -0. 016384  | 324   | 387   | 1441  |
| MSTRG. 29550. 1  | coding    | 0. 075      | 3285  | 4950  | 5107  |
| MSTRG. 29550. 2  | coding    | 0. 075      | 3345  | 5010  | 6559  |
| MSTRG. 29551. 1  | noncoding | -0. 0376832 | 7068  | 7284  | 11023 |
| MSTRG. 29552. 2  | coding    | 0. 112      | 3588  | 4566  | 4901  |
| MSTRG. 29553. 1  | coding    | 0. 075      | 51    | 750   | 1766  |
| MSTRG. 29553. 2  | coding    | 0. 06       | 108   | 759   | 1810  |
| MSTRG. 29553. 3  | coding    | 0. 069      | 204   | 570   | 1620  |
| MSTRG. 29553. 4  | coding    | 0. 049      | 21    | 381   | 1432  |
| MSTRG. 29553. 5  | coding    | 0. 069      | 204   | 570   | 1584  |
| MSTRG. 29553. 6  | coding    | 0. 069      | 195   | 561   | 1612  |
| MSTRG. 29553. 7  | coding    | 0. 06       | 108   | 759   | 1443  |
| MSTRG. 29554. 2  | noncoding | -0. 1650688 | 0     | 90    | 1105  |
| MSTRG. 29556. 1  | coding    | 0. 073      | 750   | 981   | 5550  |
| MSTRG. 29548. 2  | coding    | 0. 323      | 327   | 2457  | 5539  |
| MSTRG. 29548. 1  | coding    | 0. 199      | 291   | 4242  | 5382  |
| MSTRG. 29547. 1  | noncoding | -0. 0364544 | 255   | 990   | 1310  |
| MSTRG. 29571. 1  | noncoding | -0. 0585728 | 51    | 273   | 428   |
| MSTRG. 29576. 3  | coding    | 0. 033      | 438   | 1620  | 1905  |
| MSTRG. 29576. 4  | noncoding | -0. 0086016 | 738   | 888   | 2520  |
| MSTRG. 29578. 3  | coding    | 0. 378      | 0     | 234   | 4561  |
| MSTRG. 29580. 1  | noncoding | -0. 200704  | 177   | 207   | 373   |
| MSTRG. 29583. 2  | coding    | 0. 285      | 0     | 3909  | 10572 |
| MSTRG. 29583. 4  | coding    | 0. 281      | 0     | 3843  | 7415  |
| MSTRG. 29584. 1  | noncoding | -0. 0004096 | 630   | 714   | 1181  |
| MSTRG. 29585. 2  | coding    | 0. 384      | 93    | 1935  | 2152  |
| MSTRG. 29593. 2  | coding    | 0. 394      | 0     | 1830  | 9687  |
| MSTRG. 29594. 3  | noncoding | -0. 0339968 | 954   | 1221  | 4895  |
| MSTRG. 29596. 1  | noncoding | -0. 0114688 | 42    | 105   | 772   |
| MSTRG. 29588. 2  | coding    | 0. 461      | 21    | 1731  | 2092  |
| MSTRG. 29598. 1  | coding    | 0. 55       | 0     | 492   | 1928  |
| MSTRG. 29600. 2  | coding    | 0. 424      | 0     | 1935  | 9324  |
| MSTRG. 29601. 1  | noncoding | -0. 0028672 | 3888  | 4053  | 4908  |
| MSTRG. 29599. 1  | noncoding | -0. 147456  | 72    | 108   | 375   |
| MSTRG. 29599. 2  | noncoding | -0. 147456  | 48    | 84    | 366   |
| MSTRG. 29603. 3  | coding    | 0. 126      | 6684  | 9321  | 9476  |
| MSTRG. 29607. 6  | noncoding | -0. 0434176 | 1440  | 1584  | 1749  |
| MSTRG. 29607. 11 | noncoding | -0. 0462848 | 195   | 441   | 606   |
| MSTRG. 29607. 10 | coding    | 0. 052      | 63    | 5055  | 6125  |
| MSTRG. 29607. 5  | coding    | 0. 046      | 23415 | 28575 | 29646 |
| MSTRG. 29608. 1  | noncoding | -0. 0192512 | 441   | 591   | 3633  |

|                  |           |             |      |      |      |
|------------------|-----------|-------------|------|------|------|
| MSTRG. 29620. 1  | coding    | 0. 18       | 771  | 2868 | 6844 |
| MSTRG. 29624. 1  | noncoding | -0. 049152  | 15   | 198  | 455  |
| MSTRG. 29625. 1  | noncoding | -0. 0012288 | 105  | 156  | 692  |
| MSTRG. 29625. 2  | noncoding | -0. 073728  | 513  | 615  | 835  |
| MSTRG. 29627. 1  | noncoding | -0. 016384  | 375  | 438  | 592  |
| MSTRG. 29633. 2  | noncoding | -0. 028672  | 651  | 774  | 1494 |
| MSTRG. 29634. 2  | coding    | 0. 448      | 939  | 6612 | 7222 |
| MSTRG. 29635. 2  | coding    | 0. 365      | 0    | 5046 | 6815 |
| MSTRG. 29652. 1  | noncoding | -0. 0503808 | 0    | 87   | 380  |
| MSTRG. 29654. 1  | coding    | 0. 279      | 0    | 2382 | 2542 |
| MSTRG. 29654. 4  | coding    | 0. 298      | 1470 | 3501 | 4387 |
| MSTRG. 29654. 2  | coding    | 0. 295      | 159  | 2217 | 3104 |
| MSTRG. 29654. 5  | coding    | 0. 287      | 156  | 2634 | 2991 |
| MSTRG. 29657. 1  | coding    | 0. 407      | 0    | 3639 | 7411 |
| MSTRG. 29657. 4  | coding    | 0. 355      | 0    | 6684 | 7299 |
| MSTRG. 29657. 9  | coding    | 0. 307      | 0    | 2832 | 3342 |
| MSTRG. 29657. 11 | coding    | 0. 532      | 0    | 2739 | 3145 |
| MSTRG. 29644. 1  | coding    | 0. 284      | 0    | 2481 | 4036 |
| MSTRG. 29647. 2  | noncoding | -0. 0548864 | 525  | 1812 | 5372 |
| MSTRG. 29647. 3  | noncoding | -0. 0548864 | 1473 | 2760 | 6004 |
| MSTRG. 29663. 2  | coding    | 0. 372      | 0    | 591  | 849  |
| MSTRG. 29664. 2  | coding    | 0. 336      | 66   | 1011 | 1393 |
| MSTRG. 29666. 5  | coding    | 0. 448      | 765  | 2049 | 2377 |
| MSTRG. 29667. 1  | coding    | 0. 317      | 0    | 999  | 1283 |
| MSTRG. 29667. 2  | coding    | 0. 309      | 0    | 1011 | 1293 |
| MSTRG. 29667. 3  | coding    | 0. 307      | 0    | 1020 | 1285 |
| MSTRG. 29667. 4  | coding    | 0. 268      | 810  | 1920 | 2126 |
| MSTRG. 29668. 3  | coding    | 0. 306      | 198  | 996  | 1852 |
| MSTRG. 29672. 2  | coding    | 0. 515      | 744  | 3000 | 5915 |
| MSTRG. 29673. 1  | coding    | 0. 124      | 498  | 1137 | 1882 |
| MSTRG. 29673. 3  | coding    | 0. 145      | 93   | 735  | 1021 |
| MSTRG. 29658. 7  | coding    | 0. 236      | 156  | 420  | 823  |
| MSTRG. 29658. 5  | coding    | 0. 21       | 156  | 345  | 919  |
| MSTRG. 29675. 2  | coding    | 0. 15       | 0    | 3099 | 3404 |
| MSTRG. 29675. 5  | coding    | 0. 227      | 0    | 1218 | 1768 |
| MSTRG. 29676. 2  | noncoding | -0. 0745472 | 0    | 384  | 1425 |
| MSTRG. 29676. 1  | noncoding | -0. 0671744 | 708  | 963  | 1483 |
| MSTRG. 29676. 3  | noncoding | -0. 03072   | 711  | 1206 | 2555 |
| MSTRG. 29676. 4  | noncoding | -0. 0462848 | 2289 | 2517 | 3128 |
| MSTRG. 29676. 5  | noncoding | -0. 0462848 | 1671 | 1899 | 2513 |
| MSTRG. 29676. 6  | noncoding | -0. 03072   | 714  | 1209 | 1802 |
| MSTRG. 29677. 3  | coding    | 0. 453      | 0    | 315  | 1388 |
| MSTRG. 29677. 6  | coding    | 0. 453      | 0    | 315  | 1315 |
| MSTRG. 29677. 8  | coding    | 0. 46       | 0    | 1434 | 2514 |
| MSTRG. 29677. 5  | coding    | 0. 417      | 0    | 1449 | 2528 |
| MSTRG. 29677. 7  | coding    | 0. 399      | 0    | 1521 | 2601 |
| MSTRG. 29677. 2  | coding    | 0. 386      | 0    | 1674 | 1843 |
| MSTRG. 29678. 3  | coding    | 0. 342      | 483  | 2340 | 2542 |
| MSTRG. 29678. 2  | coding    | 0. 345      | 507  | 2364 | 2567 |
| MSTRG. 29682. 4  | coding    | 0. 353      | 117  | 1320 | 1493 |
| MSTRG. 29687. 2  | coding    | 0. 419      | 51   | 1161 | 1463 |
| MSTRG. 29687. 3  | coding    | 0. 42       | 9    | 1119 | 1306 |
| MSTRG. 29681. 1  | coding    | 0. 232      | 132  | 1449 | 1777 |
| MSTRG. 29692. 2  | coding    | 0. 326      | 0    | 1593 | 2193 |

|                  |           |             |      |      |       |
|------------------|-----------|-------------|------|------|-------|
| MSTRG. 29692. 3  | coding    | 0. 37       | 0    | 759  | 1357  |
| MSTRG. 29693. 2  | noncoding | -0. 0516096 | 135  | 600  | 1083  |
| MSTRG. 29695. 2  | coding    | 0. 362      | 165  | 1395 | 3272  |
| MSTRG. 29696. 1  | coding    | 0. 198      | 153  | 2217 | 2376  |
| MSTRG. 29696. 2  | noncoding | -0. 0401408 | 2172 | 2343 | 2783  |
| MSTRG. 29696. 3  | noncoding | -0. 0200704 | 87   | 243  | 397   |
| MSTRG. 29704. 3  | coding    | 0. 24       | 24   | 9546 | 11205 |
| MSTRG. 29699. 3  | coding    | 0. 51       | 0    | 243  | 584   |
| MSTRG. 29700. 1  | noncoding | -0. 0733184 | 573  | 1062 | 1218  |
| MSTRG. 29700. 2  | noncoding | -0. 0823296 | 165  | 636  | 1055  |
| MSTRG. 29701. 3  | noncoding | -0. 0053248 | 6    | 93   | 295   |
| MSTRG. 29722. 1  | noncoding | -0. 0413696 | 60   | 252  | 1717  |
| MSTRG. 29722. 2  | noncoding | -0. 028672  | 249  | 291  | 685   |
| MSTRG. 29723. 1  | coding    | 0. 47       | 0    | 708  | 1337  |
| MSTRG. 29723. 3  | noncoding | -0. 008192  | 744  | 849  | 1652  |
| MSTRG. 29724. 1  | noncoding | -0. 0446464 | 900  | 1050 | 2215  |
| MSTRG. 29725. 1  | noncoding | -0. 012288  | 309  | 417  | 1492  |
| MSTRG. 29726. 1  | noncoding | -0. 0299008 | 0    | 63   | 301   |
| MSTRG. 29724. 4  | noncoding | -0. 0487424 | 1899 | 2838 | 3165  |
| MSTRG. 29724. 5  | noncoding | -0. 1253376 | 2055 | 2418 | 4271  |
| MSTRG. 29724. 6  | coding    | 0. 333      | 747  | 2808 | 3204  |
| MSTRG. 29727. 1  | noncoding | -0. 049152  | 69   | 171  | 749   |
| MSTRG. 29724. 7  | coding    | 0. 351      | 2025 | 4119 | 4515  |
| MSTRG. 29724. 10 | coding    | 0. 39       | 957  | 2322 | 2717  |
| MSTRG. 29724. 11 | coding    | 0. 29       | 9    | 2622 | 3019  |
| MSTRG. 29730. 1  | coding    | 0. 234      | 759  | 1449 | 2363  |
| MSTRG. 29735. 6  | coding    | 0. 295      | 297  | 5226 | 5866  |
| MSTRG. 29707. 1  | coding    | 0. 397      | 108  | 1464 | 1801  |
| MSTRG. 29710. 1  | noncoding | -0. 067584  | 681  | 1128 | 1527  |
| MSTRG. 29713. 2  | noncoding | -0. 053248  | 159  | 495  | 1537  |
| MSTRG. 29715. 3  | coding    | 0. 253      | 1305 | 2769 | 3070  |
| MSTRG. 29738. 1  | coding    | 0. 281      | 0    | 1320 | 3005  |
| MSTRG. 29738. 2  | coding    | 0. 281      | 0    | 1320 | 2928  |
| MSTRG. 29738. 3  | coding    | 0. 281      | 0    | 1320 | 2614  |
| MSTRG. 29739. 1  | coding    | 0. 136      | 975  | 1962 | 2149  |
| MSTRG. 29741. 2  | coding    | 0. 165      | 639  | 1128 | 2462  |
| MSTRG. 29747. 1  | coding    | 0. 49       | 99   | 951  | 1763  |
| MSTRG. 29748. 1  | noncoding | -0. 0536576 | 780  | 1113 | 1268  |
| MSTRG. 29755. 2  | coding    | 0. 473      | 0    | 1803 | 2231  |
| MSTRG. 29756. 5  | noncoding | -0. 0483328 | 1158 | 1431 | 1779  |
| MSTRG. 29757. 1  | coding    | 0. 481      | 30   | 645  | 800   |
| MSTRG. 29759. 1  | coding    | 0. 176      | 288  | 888  | 4320  |
| MSTRG. 29758. 1  | coding    | 0. 13       | 624  | 1617 | 2212  |
| MSTRG. 29763. 1  | coding    | 0. 404      | 0    | 2373 | 4672  |
| MSTRG. 29763. 4  | coding    | 0. 576      | 1476 | 2229 | 2878  |
| MSTRG. 29767. 1  | coding    | 0. 295      | 0    | 729  | 1544  |
| MSTRG. 29767. 2  | coding    | 0. 295      | 60   | 831  | 1317  |
| MSTRG. 29767. 3  | coding    | 0. 295      | 0    | 729  | 1420  |
| MSTRG. 29767. 4  | coding    | 0. 295      | 0    | 729  | 1151  |
| MSTRG. 29767. 5  | coding    | 0. 28       | 0    | 774  | 2408  |
| MSTRG. 29773. 2  | noncoding | -0. 004096  | 129  | 273  | 3358  |
| MSTRG. 29774. 1  | coding    | 0. 388      | 612  | 936  | 1658  |
| MSTRG. 29774. 4  | coding    | 0. 413      | 288  | 981  | 8208  |
| MSTRG. 29774. 10 | coding    | 0. 416      | 1407 | 1788 | 11322 |

|                  |           |             |       |       |       |
|------------------|-----------|-------------|-------|-------|-------|
| MSTRG. 29774. 9  | coding    | 0. 397      | 591   | 1260  | 8485  |
| MSTRG. 29774. 7  | coding    | 0. 413      | 342   | 1035  | 8456  |
| MSTRG. 29774. 12 | coding    | 0. 416      | 285   | 666   | 8031  |
| MSTRG. 29774. 13 | coding    | 0. 381      | 549   | 1341  | 8499  |
| MSTRG. 29774. 15 | coding    | 0. 416      | 558   | 1260  | 8486  |
| MSTRG. 29776. 1  | noncoding | -0. 0233472 | 3288  | 3528  | 3838  |
| MSTRG. 29769. 2  | coding    | 0. 379      | 0     | 1473  | 1896  |
| MSTRG. 29849. 2  | coding    | 0. 374      | 177   | 4359  | 6255  |
| MSTRG. 29849. 4  | coding    | 0. 376      | 177   | 4311  | 6207  |
| MSTRG. 29849. 3  | coding    | 0. 375      | 975   | 5112  | 7006  |
| MSTRG. 29851. 1  | noncoding | -0. 04096   | 5157  | 5286  | 6121  |
| MSTRG. 29852. 1  | noncoding | -0. 0139264 | 1920  | 2097  | 3413  |
| MSTRG. 29853. 1  | noncoding | -0. 0528384 | 4365  | 5007  | 21383 |
| MSTRG. 29854. 1  | noncoding | -0. 159744  | 216   | 261   | 451   |
| MSTRG. 29856. 1  | noncoding | -0. 086016  | 639   | 690   | 1699  |
| MSTRG. 29857. 1  | noncoding | -0. 028672  | 210   | 315   | 43983 |
| MSTRG. 29858. 1  | noncoding | -0. 0126976 | 1308  | 1455  | 10797 |
| MSTRG. 29860. 1  | noncoding | -0. 024576  | 3447  | 3552  | 4139  |
| MSTRG. 29861. 1  | coding    | 0. 049      | 1599  | 2037  | 6847  |
| MSTRG. 29861. 2  | coding    | 0. 049      | 1764  | 2202  | 6865  |
| MSTRG. 29861. 3  | coding    | 0. 049      | 1548  | 1986  | 3458  |
| MSTRG. 29849. 5  | noncoding | -0. 086016  | 52668 | 52929 | 73817 |
| MSTRG. 29849. 6  | noncoding | -0. 0323584 | 45006 | 45207 | 47030 |
| MSTRG. 29849. 7  | noncoding | -0. 0155648 | 9630  | 9858  | 33376 |
| MSTRG. 29849. 8  | noncoding | -0. 012288  | 17073 | 17184 | 31545 |
| MSTRG. 29849. 9  | noncoding | -0. 0073728 | 27681 | 27828 | 29633 |
| MSTRG. 29849. 10 | noncoding | -0. 008192  | 8412  | 8550  | 14733 |
| MSTRG. 29791. 15 | coding    | 0. 089      | 591   | 1824  | 2519  |
| MSTRG. 29791. 16 | coding    | 0. 101      | 690   | 2283  | 2828  |
| MSTRG. 29791. 7  | coding    | 0. 101      | 690   | 2283  | 3113  |
| MSTRG. 29791. 8  | coding    | 0. 136      | 582   | 3207  | 3901  |
| MSTRG. 29791. 13 | coding    | 0. 139      | 2553  | 5511  | 6342  |
| MSTRG. 29791. 10 | coding    | 0. 135      | 5649  | 8484  | 9027  |
| MSTRG. 29791. 11 | coding    | 0. 148      | 0     | 3156  | 3701  |
| MSTRG. 29791. 9  | coding    | 0. 134      | 0     | 3228  | 4058  |
| MSTRG. 29791. 17 | coding    | 0. 146      | 4119  | 4896  | 6735  |
| MSTRG. 29791. 18 | coding    | 0. 163      | 12    | 747   | 2072  |
| MSTRG. 29792. 1  | noncoding | -0. 0888832 | 0     | 765   | 2588  |
| MSTRG. 29786. 2  | coding    | 0. 505      | 48    | 2796  | 2952  |
| MSTRG. 29787. 1  | coding    | 0. 641      | 483   | 2325  | 4482  |
| MSTRG. 29787. 3  | coding    | 0. 633      | 483   | 2220  | 4291  |
| MSTRG. 29795. 2  | coding    | 0. 295      | 48    | 717   | 871   |
| MSTRG. 29796. 1  | noncoding | -0. 026624  | 18    | 198   | 880   |
| MSTRG. 29797. 3  | coding    | 0. 306      | 147   | 873   | 1098  |
| MSTRG. 29799. 1  | noncoding | -0. 2977792 | 0     | 681   | 2304  |
| MSTRG. 29799. 2  | coding    | 0. 474      | 0     | 1128  | 1601  |
| MSTRG. 29799. 3  | noncoding | -0. 0434176 | 309   | 621   | 1505  |
| MSTRG. 29810. 3  | coding    | 0. 376      | 672   | 1722  | 2412  |
| MSTRG. 29810. 4  | coding    | 0. 375      | 729   | 1800  | 2488  |
| MSTRG. 29810. 7  | coding    | 0. 377      | 672   | 1725  | 2415  |
| MSTRG. 29810. 8  | coding    | 0. 376      | 549   | 1599  | 2289  |
| MSTRG. 29810. 6  | coding    | 0. 351      | 1524  | 1935  | 4969  |
| MSTRG. 29810. 2  | coding    | 0. 374      | 561   | 1761  | 4861  |
| MSTRG. 29810. 9  | coding    | 0. 35       | 0     | 1380  | 4846  |

|                  |           |             |      |      |       |
|------------------|-----------|-------------|------|------|-------|
| MSTRG. 29800. 5  | coding    | 0. 265      | 1095 | 1548 | 2628  |
| MSTRG. 29800. 6  | noncoding | -0. 0774144 | 555  | 843  | 1755  |
| MSTRG. 29801. 3  | noncoding | -0. 008192  | 1329 | 1467 | 2339  |
| MSTRG. 29802. 1  | noncoding | -0. 0405504 | 8442 | 8763 | 9400  |
| MSTRG. 29815. 4  | coding    | 0. 227      | 0    | 3612 | 5401  |
| MSTRG. 29815. 2  | coding    | 0. 216      | 72   | 3186 | 5235  |
| MSTRG. 29815. 5  | coding    | 0. 226      | 0    | 3570 | 4963  |
| MSTRG. 29815. 6  | coding    | 0. 096      | 1023 | 1275 | 1738  |
| MSTRG. 29821. 4  | coding    | 0. 281      | 285  | 1179 | 1877  |
| MSTRG. 29821. 5  | coding    | 0. 319      | 423  | 978  | 2123  |
| MSTRG. 29825. 2  | coding    | 0. 223      | 105  | 693  | 892   |
| MSTRG. 29825. 3  | coding    | 0. 243      | 261  | 840  | 1038  |
| MSTRG. 29827. 1  | noncoding | -0. 0843776 | 144  | 2409 | 2862  |
| MSTRG. 29830. 1  | coding    | 0. 511      | 0    | 819  | 2105  |
| MSTRG. 29830. 2  | coding    | 0. 516      | 0    | 828  | 2101  |
| MSTRG. 29834. 1  | coding    | 0. 54       | 48   | 2370 | 3029  |
| MSTRG. 29835. 2  | coding    | 0. 335      | 27   | 336  | 552   |
| MSTRG. 29836. 2  | coding    | 0. 425      | 0    | 2043 | 2199  |
| MSTRG. 29846. 1  | coding    | 0. 518      | 18   | 2004 | 2904  |
| MSTRG. 29846. 8  | coding    | 0. 45       | 18   | 4416 | 12831 |
| MSTRG. 29846. 7  | coding    | 0. 425      | 534  | 5241 | 13656 |
| MSTRG. 29846. 9  | coding    | 0. 415      | 1950 | 5406 | 13813 |
| MSTRG. 29846. 10 | coding    | 0. 378      | 0    | 981  | 1134  |
| MSTRG. 29846. 11 | coding    | 0. 438      | 75   | 3849 | 4003  |
| MSTRG. 29846. 12 | coding    | 0. 143      | 9    | 465  | 10577 |
| MSTRG. 29846. 13 | noncoding | -0. 0405504 | 4293 | 4800 | 16546 |
| MSTRG. 29846. 14 | noncoding | -0. 0069632 | 6    | 201  | 6615  |
| MSTRG. 29847. 1  | noncoding | -0. 0016384 | 3483 | 3630 | 10779 |
| MSTRG. 29845. 1  | coding    | 0. 504      | 0    | 510  | 681   |
| MSTRG. 29868. 1  | coding    | 0. 301      | 642  | 1506 | 3049  |
| MSTRG. 29869. 1  | coding    | 0. 176      | 0    | 453  | 4785  |
| MSTRG. 29869. 3  | noncoding | -0. 0364544 | 348  | 825  | 1172  |
| MSTRG. 29869. 5  | noncoding | -0. 0651264 | 2619 | 2946 | 4653  |
| MSTRG. 29869. 4  | noncoding | -0. 0364544 | 408  | 885  | 1230  |
| MSTRG. 29869. 6  | noncoding | -0. 0651264 | 1617 | 1944 | 3361  |
| MSTRG. 29869. 7  | noncoding | -0. 014336  | 2745 | 2946 | 5439  |
| MSTRG. 29866. 2  | noncoding | -0. 028672  | 27   | 105  | 261   |
| MSTRG. 29867. 1  | coding    | 0. 131      | 447  | 1674 | 1829  |
| MSTRG. 29867. 2  | noncoding | -0. 0290816 | 393  | 678  | 1728  |
| MSTRG. 29879. 4  | coding    | 0. 373      | 0    | 1776 | 2508  |
| MSTRG. 29879. 6  | coding    | 0. 351      | 0    | 1251 | 1968  |
| MSTRG. 29879. 7  | coding    | 0. 385      | 0    | 1728 | 1882  |
| MSTRG. 29879. 3  | coding    | 0. 414      | 0    | 2040 | 2345  |
| MSTRG. 29880. 2  | coding    | 0. 39       | 45   | 3189 | 3380  |
| MSTRG. 29880. 3  | coding    | 0. 424      | 2109 | 4182 | 4374  |
| MSTRG. 29881. 2  | coding    | 0. 302      | 81   | 1074 | 1295  |
| MSTRG. 29884. 1  | coding    | 0. 367      | 0    | 501  | 943   |
| MSTRG. 29884. 2  | coding    | 0. 369      | 0    | 483  | 971   |
| MSTRG. 29884. 3  | coding    | 0. 354      | 102  | 531  | 897   |
| MSTRG. 29885. 3  | coding    | 0. 482      | 1233 | 3474 | 5789  |
| MSTRG. 29890. 4  | coding    | 0. 258      | 27   | 768  | 978   |
| MSTRG. 29891. 1  | coding    | 0. 437      | 0    | 846  | 1287  |
| MSTRG. 29891. 2  | coding    | 0. 335      | 501  | 1242 | 1682  |
| MSTRG. 29891. 3  | coding    | 0. 306      | 0    | 1728 | 4529  |

|                 |           |             |      |       |       |
|-----------------|-----------|-------------|------|-------|-------|
| MSTRG. 29891. 4 | coding    | 0. 314      | 0    | 1659  | 4460  |
| MSTRG. 29891. 6 | coding    | 0. 306      | 0    | 1728  | 2123  |
| MSTRG. 29891. 7 | coding    | 0. 319      | 321  | 1866  | 2261  |
| MSTRG. 29894. 2 | coding    | 0. 414      | 0    | 1791  | 2198  |
| MSTRG. 29894. 3 | coding    | 0. 363      | 483  | 2223  | 3463  |
| MSTRG. 29894. 4 | coding    | 0. 356      | 462  | 2271  | 2649  |
| MSTRG. 29896. 7 | noncoding | -0. 0577536 | 1275 | 1917  | 2710  |
| MSTRG. 29896. 6 | noncoding | -0. 0663552 | 225  | 684   | 1530  |
| MSTRG. 29896. 4 | coding    | 0. 24       | 0    | 1335  | 2180  |
| MSTRG. 29896. 5 | coding    | 0. 249      | 0    | 1161  | 2006  |
| MSTRG. 29897. 1 | noncoding | -0. 0126976 | 153  | 318   | 680   |
| MSTRG. 29897. 2 | noncoding | -0. 0172032 | 378  | 771   | 1145  |
| MSTRG. 29897. 3 | noncoding | -0. 0126976 | 135  | 300   | 730   |
| MSTRG. 29889. 2 | coding    | 0. 314      | 387  | 915   | 1262  |
| MSTRG. 29900. 1 | coding    | 0. 143      | 288  | 2163  | 2410  |
| MSTRG. 29903. 3 | coding    | 0. 309      | 39   | 3990  | 4483  |
| MSTRG. 29903. 1 | coding    | 0. 309      | 1032 | 5076  | 5568  |
| MSTRG. 29904. 1 | coding    | 0. 325      | 477  | 2325  | 3264  |
| MSTRG. 29902. 1 | coding    | 0. 305      | 0    | 306   | 1867  |
| MSTRG. 29902. 2 | coding    | 0. 305      | 0    | 306   | 642   |
| MSTRG. 29902. 3 | noncoding | -0. 118784  | 150  | 492   | 737   |
| MSTRG. 29910. 3 | coding    | 0. 23       | 357  | 918   | 1657  |
| MSTRG. 29910. 2 | coding    | 0. 265      | 711  | 1293  | 2033  |
| MSTRG. 29912. 2 | coding    | 0. 281      | 444  | 1482  | 2340  |
| MSTRG. 29912. 3 | coding    | 0. 282      | 987  | 2280  | 2553  |
| MSTRG. 29912. 4 | coding    | 0. 282      | 1023 | 2316  | 2590  |
| MSTRG. 29912. 5 | coding    | 0. 314      | 1125 | 1827  | 2687  |
| MSTRG. 29912. 6 | coding    | 0. 332      | 582  | 1518  | 2377  |
| MSTRG. 29906. 2 | coding    | 0. 308      | 654  | 2040  | 2592  |
| MSTRG. 29906. 4 | coding    | 0. 317      | 993  | 2355  | 2742  |
| MSTRG. 29908. 4 | coding    | 0. 289      | 6    | 1407  | 7721  |
| MSTRG. 29916. 1 | noncoding | -0. 0004096 | 2118 | 2160  | 2489  |
| MSTRG. 29917. 1 | coding    | 0. 163      | 120  | 1191  | 1459  |
| MSTRG. 29917. 3 | coding    | 0. 164      | 78   | 1134  | 1404  |
| MSTRG. 29918. 1 | noncoding | -0. 1024    | 177  | 267   | 592   |
| MSTRG. 29920. 1 | coding    | 0. 407      | 453  | 2187  | 14284 |
| MSTRG. 29923. 5 | coding    | 0. 232      | 750  | 1437  | 1690  |
| MSTRG. 29923. 6 | coding    | 0. 206      | 519  | 1068  | 1258  |
| MSTRG. 29921. 1 | coding    | 0. 01       | 219  | 615   | 1974  |
| MSTRG. 29921. 4 | coding    | 0. 124      | 168  | 1302  | 1594  |
| MSTRG. 29921. 5 | coding    | 0. 076      | 660  | 1662  | 1953  |
| MSTRG. 29926. 3 | coding    | 0. 194      | 729  | 2613  | 4023  |
| MSTRG. 29926. 2 | coding    | 0. 195      | 732  | 2619  | 4027  |
| MSTRG. 29927. 3 | coding    | 0. 16       | 921  | 2343  | 2508  |
| MSTRG. 29934. 4 | coding    | 0. 169      | 345  | 777   | 1045  |
| MSTRG. 29934. 5 | coding    | 0. 169      | 225  | 657   | 925   |
| MSTRG. 29934. 8 | coding    | 0. 171      | 303  | 717   | 872   |
| MSTRG. 29941. 3 | coding    | 0. 368      | 0    | 2403  | 4967  |
| MSTRG. 29941. 4 | coding    | 0. 382      | 0    | 2175  | 5365  |
| MSTRG. 29943. 5 | coding    | 0. 587      | 519  | 1779  | 2549  |
| MSTRG. 29943. 3 | coding    | 0. 53       | 0    | 9858  | 10627 |
| MSTRG. 29943. 2 | coding    | 0. 522      | 981  | 11472 | 12241 |
| MSTRG. 29943. 4 | coding    | 0. 52       | 981  | 11505 | 12274 |
| MSTRG. 29938. 1 | noncoding | -0. 01024   | 225  | 372   | 527   |

|                  |           |             |      |       |       |
|------------------|-----------|-------------|------|-------|-------|
| MSTRG. 29946. 2  | noncoding | -0. 0790528 | 189  | 561   | 946   |
| MSTRG. 29947. 1  | noncoding | -0. 063488  | 0    | 189   | 730   |
| MSTRG. 29949. 1  | noncoding | -0. 1253376 | 1227 | 1833  | 1990  |
| MSTRG. 29948. 2  | noncoding | -0. 0790528 | 0    | 1110  | 2075  |
| MSTRG. 29950. 4  | coding    | 0. 381      | 588  | 4221  | 7468  |
| MSTRG. 29950. 5  | coding    | 0. 312      | 4005 | 9243  | 12450 |
| MSTRG. 29950. 6  | coding    | 0. 365      | 4845 | 8775  | 11943 |
| MSTRG. 29965. 1  | coding    | 0. 198      | 153  | 2673  | 3938  |
| MSTRG. 29965. 5  | coding    | 0. 198      | 177  | 2697  | 3004  |
| MSTRG. 29967. 2  | coding    | 0. 401      | 552  | 1278  | 1524  |
| MSTRG. 29970. 1  | coding    | 0. 294      | 1110 | 4782  | 5934  |
| MSTRG. 29970. 2  | coding    | 0. 294      | 1266 | 4938  | 6090  |
| MSTRG. 29970. 3  | coding    | 0. 294      | 540  | 4212  | 4730  |
| MSTRG. 29970. 4  | coding    | 0. 29       | 804  | 4455  | 5606  |
| MSTRG. 29970. 5  | coding    | 0. 29       | 786  | 4437  | 4953  |
| MSTRG. 29970. 7  | coding    | 0. 29       | 228  | 3879  | 4395  |
| MSTRG. 29970. 8  | coding    | 0. 294      | 609  | 4281  | 4797  |
| MSTRG. 29970. 9  | coding    | 0. 348      | 120  | 3036  | 3553  |
| MSTRG. 29974. 3  | coding    | 0. 488      | 0    | 1254  | 4192  |
| MSTRG. 29974. 2  | coding    | 0. 552      | 0    | 1137  | 4075  |
| MSTRG. 29975. 1  | noncoding | -0. 0536576 | 0    | 111   | 2736  |
| MSTRG. 29954. 1  | noncoding | -0. 0147456 | 6    | 186   | 424   |
| MSTRG. 29955. 1  | noncoding | -0. 0610304 | 1608 | 2529  | 2684  |
| MSTRG. 29957. 2  | coding    | 0. 468      | 0    | 1962  | 4513  |
| MSTRG. 29961. 2  | noncoding | -0. 0401408 | 12   | 657   | 1441  |
| MSTRG. 29980. 5  | noncoding | -0. 0425984 | 2142 | 2316  | 14083 |
| MSTRG. 29978. 3  | noncoding | -0. 0315392 | 5076 | 5268  | 7467  |
| MSTRG. 29978. 1  | noncoding | -0. 032768  | 276  | 483   | 2765  |
| MSTRG. 29978. 2  | noncoding | -0. 073728  | 60   | 87    | 876   |
| MSTRG. 29985. 3  | coding    | 0. 249      | 222  | 3081  | 5414  |
| MSTRG. 29985. 4  | coding    | 0. 249      | 1239 | 4098  | 6431  |
| MSTRG. 29990. 1  | coding    | 0. 511      | 246  | 9834  | 10618 |
| MSTRG. 29990. 2  | coding    | 0. 513      | 225  | 9660  | 10386 |
| MSTRG. 29990. 5  | coding    | 0. 519      | 0    | 5592  | 7157  |
| MSTRG. 29990. 6  | coding    | 0. 523      | 0    | 9144  | 10300 |
| MSTRG. 29990. 7  | coding    | 0. 52       | 0    | 9159  | 10317 |
| MSTRG. 29990. 8  | coding    | 0. 52       | 0    | 9255  | 9962  |
| MSTRG. 29990. 9  | coding    | 0. 535      | 1353 | 9816  | 10440 |
| MSTRG. 29990. 10 | coding    | 0. 469      | 603  | 10542 | 11327 |
| MSTRG. 29991. 1  | noncoding | -0. 0323584 | 192  | 2193  | 2554  |
| MSTRG. 29991. 2  | noncoding | -0. 0790528 | 219  | 1023  | 1586  |
| MSTRG. 29997. 1  | coding    | 0. 262      | 0    | 3612  | 8506  |
| MSTRG. 29997. 2  | coding    | 0. 27       | 0    | 3561  | 7373  |
| MSTRG. 30003. 7  | coding    | 0. 555      | 45   | 2256  | 3127  |
| MSTRG. 30003. 2  | coding    | 0. 575      | 183  | 3609  | 4479  |
| MSTRG. 30003. 5  | coding    | 0. 547      | 132  | 5547  | 6417  |
| MSTRG. 30003. 4  | coding    | 0. 518      | 468  | 6522  | 7393  |
| MSTRG. 30003. 3  | coding    | 0. 535      | 123  | 6069  | 6938  |
| MSTRG. 30003. 6  | coding    | 0. 541      | 0    | 5952  | 6821  |
| MSTRG. 30003. 8  | coding    | 0. 577      | 279  | 3516  | 3795  |
| MSTRG. 30003. 9  | coding    | 0. 282      | 144  | 1161  | 1348  |
| MSTRG. 29998. 1  | noncoding | -0. 0446464 | 177  | 477   | 1114  |
| MSTRG. 29999. 1  | noncoding | -0. 016384  | 282  | 609   | 1128  |
| MSTRG. 30009. 10 | coding    | 0. 33       | 0    | 2166  | 2320  |



|                  |           |             |      |      |      |
|------------------|-----------|-------------|------|------|------|
| MSTRG. 30009. 11 | coding    | 0. 388      | 0    | 1746 | 1901 |
| MSTRG. 30009. 6  | coding    | 0. 395      | 0    | 1848 | 2003 |
| MSTRG. 30009. 7  | coding    | 0. 371      | 0    | 2103 | 2259 |
| MSTRG. 30009. 15 | coding    | 0. 386      | 0    | 2079 | 4818 |
| MSTRG. 30009. 8  | coding    | 0. 387      | 0    | 1914 | 4656 |
| MSTRG. 30009. 17 | coding    | 0. 35       | 0    | 1839 | 1993 |
| MSTRG. 30009. 18 | coding    | 0. 376      | 0    | 1929 | 2084 |
| MSTRG. 30009. 19 | coding    | 0. 339      | 0    | 2124 | 4868 |
| MSTRG. 30009. 20 | coding    | 0. 351      | 0    | 1815 | 1970 |
| MSTRG. 30009. 21 | coding    | 0. 386      | 0    | 1947 | 2102 |
| MSTRG. 30009. 22 | coding    | 0. 375      | 0    | 1758 | 1914 |
| MSTRG. 30009. 23 | coding    | 0. 331      | 9    | 2250 | 2405 |
| MSTRG. 30009. 24 | noncoding | -0. 1036288 | 231  | 1053 | 1800 |
| MSTRG. 30005. 3  | coding    | 0. 51       | 0    | 1650 | 6579 |
| MSTRG. 30010. 3  | coding    | 0. 418      | 837  | 2292 | 4354 |
| MSTRG. 30010. 1  | coding    | 0. 489      | 0    | 2478 | 4540 |
| MSTRG. 30010. 2  | coding    | 0. 51       | 0    | 2352 | 4414 |
| MSTRG. 30011. 2  | coding    | 0. 337      | 60   | 2340 | 3377 |
| MSTRG. 30016. 2  | coding    | 0. 246      | 561  | 3606 | 3968 |
| MSTRG. 30016. 3  | coding    | 0. 248      | 141  | 3207 | 3853 |
| MSTRG. 30016. 5  | coding    | 0. 562      | 168  | 1458 | 1621 |
| MSTRG. 30016. 4  | coding    | 0. 249      | 915  | 3990 | 4638 |
| MSTRG. 30018. 1  | noncoding | -0. 083968  | 0    | 495  | 733  |
| MSTRG. 30020. 2  | noncoding | -0. 0864256 | 3576 | 3981 | 4229 |
| MSTRG. 30020. 3  | noncoding | -0. 0487424 | 4380 | 4704 | 4860 |
| MSTRG. 30013. 1  | noncoding | -0. 0323584 | 87   | 1911 | 2067 |
| MSTRG. 30014. 1  | noncoding | -0. 0499712 | 30   | 345  | 774  |
| MSTRG. 30014. 2  | noncoding | -0. 0364544 | 480  | 1026 | 1252 |
| MSTRG. 30014. 3  | noncoding | -0. 0323584 | 21   | 771  | 1277 |
| MSTRG. 30014. 4  | noncoding | -0. 026624  | 21   | 612  | 801  |
| MSTRG. 30024. 3  | coding    | 0. 322      | 60   | 480  | 702  |
| MSTRG. 30033. 1  | noncoding | -0. 0458752 | 579  | 1233 | 2272 |
| MSTRG. 30035. 2  | coding    | 0. 416      | 1161 | 3069 | 3491 |
| MSTRG. 30036. 2  | coding    | 0. 283      | 0    | 2241 | 2711 |
| MSTRG. 30036. 3  | coding    | 0. 266      | 1923 | 4485 | 4953 |
| MSTRG. 30036. 4  | coding    | 0. 354      | 543  | 2253 | 2622 |
| MSTRG. 30054. 11 | coding    | 0. 297      | 2781 | 5046 | 6833 |
| MSTRG. 30054. 13 | coding    | 0. 283      | 2781 | 5103 | 6892 |
| MSTRG. 30054. 2  | coding    | 0. 302      | 2319 | 4491 | 6280 |
| MSTRG. 30054. 7  | coding    | 0. 308      | 2301 | 4395 | 6183 |
| MSTRG. 30054. 8  | coding    | 0. 3        | 0    | 2199 | 3988 |
| MSTRG. 30054. 17 | coding    | 0. 304      | 2319 | 4596 | 6287 |
| MSTRG. 30054. 19 | coding    | 0. 288      | 0    | 1230 | 1533 |
| MSTRG. 30054. 21 | coding    | 0. 272      | 144  | 1722 | 1877 |
| MSTRG. 30054. 20 | coding    | 0. 271      | 2244 | 4107 | 4261 |
| MSTRG. 30054. 18 | coding    | 0. 266      | 2331 | 3987 | 4142 |
| MSTRG. 30040. 2  | coding    | 0. 59       | 156  | 1392 | 2393 |
| MSTRG. 30040. 3  | coding    | 0. 492      | 0    | 513  | 1514 |
| MSTRG. 30039. 1  | coding    | 0. 455      | 0    | 669  | 2562 |
| MSTRG. 30046. 1  | noncoding | -0. 09216   | 0    | 231  | 1041 |
| MSTRG. 30046. 2  | noncoding | -0. 0630784 | 63   | 462  | 988  |
| MSTRG. 30049. 3  | coding    | 0. 427      | 27   | 1029 | 2496 |
| MSTRG. 30049. 2  | coding    | 0. 427      | 27   | 1029 | 2326 |
| MSTRG. 30055. 1  | noncoding | -0. 0835584 | 738  | 1038 | 1222 |

|                 |           |             |       |       |       |
|-----------------|-----------|-------------|-------|-------|-------|
| MSTRG. 30064. 5 | coding    | 0. 027      | 123   | 366   | 726   |
| MSTRG. 30064. 6 | coding    | 0. 058      | 93    | 273   | 622   |
| MSTRG. 30068. 1 | coding    | 0. 091      | 129   | 309   | 554   |
| MSTRG. 30068. 2 | noncoding | -0. 0495616 | 66    | 159   | 403   |
| MSTRG. 30087. 1 | noncoding | -0. 0135168 | 30    | 96    | 249   |
| MSTRG. 30091. 1 | noncoding | -0. 0196608 | 0     | 96    | 341   |
| MSTRG. 30114. 1 | coding    | 0. 143      | 165   | 1965  | 2547  |
| MSTRG. 30114. 3 | noncoding | -0. 1028096 | 450   | 1473  | 2299  |
| MSTRG. 30102. 1 | coding    | 0. 097      | 246   | 921   | 1101  |
| MSTRG. 30102. 2 | coding    | 0. 116      | 93    | 1866  | 2046  |
| MSTRG. 30102. 3 | coding    | 0. 044      | 147   | 408   | 578   |
| MSTRG. 30126. 5 | coding    | 0. 23       | 11121 | 12111 | 12551 |
| MSTRG. 30127. 1 | noncoding | -0. 0397312 | 873   | 1284  | 1607  |
| MSTRG. 30128. 1 | noncoding | -0. 004096  | 3132  | 3210  | 4195  |
| MSTRG. 30129. 1 | coding    | 0. 08       | 3768  | 4272  | 7851  |
| MSTRG. 30130. 1 | coding    | 0. 075      | 8532  | 9075  | 10413 |
| MSTRG. 30132. 1 | noncoding | -0. 036864  | 231   | 297   | 1156  |
| MSTRG. 30121. 2 | coding    | 0. 259      | 93    | 1089  | 2285  |
| MSTRG. 30122. 3 | noncoding | -0. 1036288 | 0     | 18    | 350   |
| MSTRG. 30124. 1 | noncoding | -0. 0004096 | 0     | 0     | 687   |
| MSTRG. 30123. 2 | coding    | 0. 115      | 2856  | 3438  | 10065 |
| MSTRG. 30138. 1 | coding    | 0. 185      | 0     | 696   | 1341  |
| MSTRG. 30143. 1 | noncoding | -0. 0864256 | 0     | 87    | 1114  |
| MSTRG. 30133. 1 | noncoding | -0. 0004096 | 0     | 0     | 326   |
| MSTRG. 30137. 1 | coding    | 0. 104      | 0     | 696   | 871   |
| MSTRG. 30165. 3 | noncoding | -0. 14336   | 312   | 375   | 675   |
| MSTRG. 30164. 1 | noncoding | -0. 004096  | 513   | 657   | 1941  |
| MSTRG. 30164. 2 | noncoding | -0. 0237568 | 1497  | 1563  | 1867  |
| MSTRG. 30175. 1 | noncoding | -0. 012288  | 186   | 270   | 797   |
| MSTRG. 30176. 1 | noncoding | -0. 032768  | 5310  | 5394  | 6522  |
| MSTRG. 30177. 1 | coding    | 0. 371      | 432   | 2283  | 3353  |
| MSTRG. 30177. 4 | coding    | 0. 309      | 0     | 753   | 3460  |
| MSTRG. 30178. 1 | noncoding | -0. 012288  | 2883  | 3015  | 5060  |
| MSTRG. 30177. 5 | noncoding | -0. 045056  | 2031  | 2211  | 2570  |
| MSTRG. 30177. 6 | noncoding | -0. 004096  | 2781  | 3060  | 3215  |
| MSTRG. 30171. 6 | coding    | 0. 079      | 588   | 1212  | 5871  |
| MSTRG. 30174. 1 | noncoding | -0. 21504   | 303   | 309   | 553   |
| MSTRG. 30182. 1 | coding    | 0. 177      | 0     | 591   | 1275  |
| MSTRG. 30186. 3 | coding    | 0. 059      | 408   | 1011  | 4525  |
| MSTRG. 30190. 2 | coding    | 0. 028      | 39    | 5802  | 7347  |
| MSTRG. 30198. 1 | coding    | 0. 34       | 48    | 2076  | 7680  |
| MSTRG. 30198. 3 | coding    | 0. 389      | 0     | 1407  | 1989  |
| MSTRG. 30198. 4 | coding    | 0. 337      | 111   | 2133  | 2324  |
| MSTRG. 30199. 2 | noncoding | -0. 0872448 | 6     | 231   | 5099  |
| MSTRG. 30199. 3 | noncoding | -0. 0872448 | 3     | 228   | 4723  |
| MSTRG. 30204. 1 | noncoding | -0. 0548864 | 3957  | 4158  | 6558  |
| MSTRG. 30204. 2 | noncoding | -0. 0548864 | 3930  | 4131  | 7247  |
| MSTRG. 30189. 2 | coding    | 0. 039      | 492   | 903   | 2432  |
| MSTRG. 30211. 1 | noncoding | -0. 012288  | 1662  | 1677  | 2017  |
| MSTRG. 30212. 3 | coding    | 0. 142      | 0     | 912   | 1591  |
| MSTRG. 30212. 4 | coding    | 0. 074      | 417   | 1122  | 6604  |
| MSTRG. 30213. 1 | coding    | 0. 056      | 1062  | 1218  | 1826  |
| MSTRG. 30214. 1 | noncoding | -0. 0012288 | 7176  | 7332  | 11133 |
| MSTRG. 30215. 2 | coding    | 0. 245      | 96    | 5310  | 6944  |

|                  |           |             |      |      |       |
|------------------|-----------|-------------|------|------|-------|
| MSTRG. 30215. 4  | coding    | 0. 232      | 96   | 1080 | 1355  |
| MSTRG. 30216. 1  | noncoding | -0. 016384  | 0    | 6    | 232   |
| MSTRG. 30217. 2  | coding    | 0. 133      | 318  | 1518 | 2079  |
| MSTRG. 30219. 1  | coding    | 0. 202      | 0    | 2109 | 2495  |
| MSTRG. 30227. 1  | noncoding | -0. 0397312 | 0    | 132  | 449   |
| MSTRG. 30227. 2  | noncoding | -0. 0032768 | 81   | 258  | 411   |
| MSTRG. 30240. 2  | coding    | 0. 191      | 507  | 2910 | 4322  |
| MSTRG. 30241. 1  | noncoding | -0. 0249856 | 1836 | 1920 | 4270  |
| MSTRG. 30245. 1  | noncoding | -0. 008192  | 633  | 687  | 1186  |
| MSTRG. 30235. 1  | coding    | 0. 208      | 246  | 933  | 1404  |
| MSTRG. 30239. 1  | noncoding | -0. 0458752 | 441  | 657  | 1808  |
| MSTRG. 30248. 3  | coding    | 0. 102      | 39   | 1293 | 1631  |
| MSTRG. 30248. 2  | coding    | 0. 126      | 423  | 1317 | 1656  |
| MSTRG. 30248. 4  | noncoding | -0. 098304  | 72   | 123  | 279   |
| MSTRG. 30248. 5  | coding    | 0. 095      | 0    | 177  | 333   |
| MSTRG. 30248. 7  | coding    | 0. 169      | 876  | 1524 | 1903  |
| MSTRG. 30248. 9  | coding    | 0. 126      | 483  | 1377 | 1756  |
| MSTRG. 30248. 8  | coding    | 0. 126      | 1773 | 2667 | 3045  |
| MSTRG. 30249. 2  | coding    | 0. 231      | 117  | 2664 | 6093  |
| MSTRG. 30258. 2  | noncoding | -0. 03072   | 3969 | 4725 | 5768  |
| MSTRG. 30258. 3  | coding    | 0. 088      | 858  | 1455 | 3219  |
| MSTRG. 30258. 4  | noncoding | -0. 03072   | 5436 | 6192 | 6504  |
| MSTRG. 30260. 1  | coding    | 0. 043      | 612  | 759  | 1178  |
| MSTRG. 30258. 5  | coding    | 0. 121      | 1305 | 1923 | 2678  |
| MSTRG. 30252. 5  | noncoding | -0. 0438272 | 7266 | 7512 | 7731  |
| MSTRG. 30271. 2  | coding    | 0. 057      | 414  | 738  | 5184  |
| MSTRG. 30271. 3  | coding    | 0. 403      | 0    | 555  | 4773  |
| MSTRG. 30272. 1  | noncoding | -0. 0221184 | 288  | 390  | 1284  |
| MSTRG. 30275. 2  | coding    | 0. 158      | 4587 | 9351 | 13406 |
| MSTRG. 30275. 6  | coding    | 0. 067      | 372  | 1740 | 10365 |
| MSTRG. 30275. 7  | coding    | 0. 158      | 372  | 5136 | 15774 |
| MSTRG. 30275. 8  | coding    | 0. 101      | 288  | 2058 | 2214  |
| MSTRG. 30275. 9  | noncoding | -0. 0004096 | 2391 | 2688 | 2843  |
| MSTRG. 30275. 12 | noncoding | -0. 036864  | 81   | 159  | 1683  |
| MSTRG. 30278. 1  | noncoding | -0. 057344  | 2604 | 2673 | 4741  |
| MSTRG. 30264. 3  | coding    | 0. 114      | 228  | 1563 | 5427  |
| MSTRG. 30265. 1  | noncoding | -0. 0118784 | 1281 | 1440 | 1595  |
| MSTRG. 30281. 1  | coding    | 0. 312      | 108  | 1095 | 2681  |
| MSTRG. 30281. 2  | coding    | 0. 316      | 108  | 1143 | 3057  |
| MSTRG. 30282. 2  | coding    | 0. 303      | 0    | 2862 | 3399  |
| MSTRG. 30282. 3  | coding    | 0. 296      | 177  | 3045 | 3499  |
| MSTRG. 30287. 2  | coding    | 0. 48       | 0    | 708  | 1405  |
| MSTRG. 30287. 4  | coding    | 0. 468      | 0    | 588  | 1309  |
| MSTRG. 30288. 2  | coding    | 0. 309      | 837  | 1203 | 1356  |
| MSTRG. 30290. 1  | coding    | 0. 345      | 726  | 1590 | 3243  |
| MSTRG. 30291. 5  | coding    | 0. 186      | 0    | 666  | 1215  |
| MSTRG. 30291. 4  | coding    | 0. 149      | 252  | 474  | 904   |
| MSTRG. 30291. 6  | coding    | 0. 138      | 0    | 504  | 935   |
| MSTRG. 30283. 1  | noncoding | -0. 0536576 | 0    | 249  | 685   |
| MSTRG. 30302. 5  | coding    | 0. 447      | 27   | 1116 | 1270  |
| MSTRG. 30315. 3  | coding    | 0. 426      | 0    | 396  | 1407  |
| MSTRG. 30315. 2  | coding    | 0. 36       | 0    | 528  | 1602  |
| MSTRG. 30315. 4  | coding    | 0. 247      | 0    | 1296 | 1540  |
| MSTRG. 30315. 5  | coding    | 0. 206      | 12   | 1200 | 1446  |

|                  |           |             |      |      |      |
|------------------|-----------|-------------|------|------|------|
| MSTRG. 30320. 1  | coding    | 0. 084      | 162  | 1053 | 4425 |
| MSTRG. 30321. 3  | noncoding | -0. 0765952 | 0    | 276  | 1433 |
| MSTRG. 30321. 4  | coding    | 0. 103      | 414  | 936  | 1560 |
| MSTRG. 30321. 5  | coding    | 0. 114      | 369  | 942  | 1564 |
| MSTRG. 30321. 6  | coding    | 0. 126      | 0    | 762  | 1385 |
| MSTRG. 30321. 7  | coding    | 0. 07       | 162  | 540  | 1162 |
| MSTRG. 30312. 1  | noncoding | -0. 200704  | 54   | 93   | 382  |
| MSTRG. 30313. 1  | noncoding | -0. 2048    | 4251 | 4293 | 5234 |
| MSTRG. 30325. 2  | coding    | 0. 104      | 0    | 1944 | 3654 |
| MSTRG. 30326. 1  | noncoding | -0. 0352256 | 1257 | 1506 | 1662 |
| MSTRG. 30326. 2  | noncoding | -0. 02048   | 1074 | 1146 | 1300 |
| MSTRG. 30322. 3  | coding    | 0. 44       | 0    | 195  | 721  |
| MSTRG. 30329. 2  | coding    | 0. 236      | 363  | 1344 | 5335 |
| MSTRG. 30331. 2  | coding    | 0. 19       | 0    | 3171 | 4116 |
| MSTRG. 30332. 2  | coding    | 0. 354      | 0    | 444  | 647  |
| MSTRG. 30332. 3  | coding    | 0. 274      | 228  | 690  | 892  |
| MSTRG. 30343. 1  | coding    | 0. 041      | 981  | 2163 | 6649 |
| MSTRG. 30343. 6  | noncoding | -0. 0622592 | 4878 | 5070 | 5224 |
| MSTRG. 30343. 4  | noncoding | -0. 0704512 | 6102 | 6285 | 6440 |
| MSTRG. 30344. 1  | coding    | 0. 381      | 987  | 3501 | 4896 |
| MSTRG. 30345. 1  | noncoding | -0. 0356352 | 0    | 462  | 684  |
| MSTRG. 30348. 1  | noncoding | -0. 090112  | 12   | 60   | 310  |
| MSTRG. 30350. 5  | noncoding | -0. 1773568 | 0    | 42   | 1171 |
| MSTRG. 30354. 2  | coding    | 0. 352      | 0    | 681  | 1810 |
| MSTRG. 30357. 2  | coding    | 0. 152      | 1020 | 3000 | 4310 |
| MSTRG. 30359. 5  | coding    | 0. 158      | 960  | 1164 | 1319 |
| MSTRG. 30359. 6  | coding    | 0. 14       | 0    | 1962 | 2115 |
| MSTRG. 30361. 7  | coding    | 0. 295      | 201  | 1086 | 3033 |
| MSTRG. 30361. 2  | coding    | 0. 295      | 330  | 1215 | 3163 |
| MSTRG. 30361. 9  | coding    | 0. 291      | 264  | 1275 | 2542 |
| MSTRG. 30361. 11 | coding    | 0. 289      | 315  | 1317 | 2907 |
| MSTRG. 30361. 5  | coding    | 0. 297      | 2721 | 3615 | 5560 |
| MSTRG. 30361. 4  | coding    | 0. 289      | 1164 | 2166 | 4114 |
| MSTRG. 30361. 14 | coding    | 0. 338      | 0    | 933  | 2524 |
| MSTRG. 30361. 15 | coding    | 0. 338      | 0    | 969  | 2239 |
| MSTRG. 30361. 12 | coding    | 0. 341      | 0    | 984  | 2251 |
| MSTRG. 30361. 6  | coding    | 0. 346      | 0    | 1017 | 2966 |
| MSTRG. 30361. 16 | coding    | 0. 297      | 2721 | 3615 | 4860 |
| MSTRG. 30362. 5  | coding    | 0. 217      | 60   | 5064 | 5351 |
| MSTRG. 30363. 8  | coding    | 0. 315      | 1572 | 6579 | 7224 |
| MSTRG. 30363. 3  | coding    | 0. 304      | 180  | 5847 | 6494 |
| MSTRG. 30363. 5  | coding    | 0. 306      | 180  | 5748 | 6395 |
| MSTRG. 30363. 6  | coding    | 0. 306      | 180  | 5751 | 6398 |
| MSTRG. 30363. 2  | coding    | 0. 304      | 180  | 5862 | 6668 |
| MSTRG. 30363. 4  | coding    | 0. 306      | 180  | 5760 | 6566 |
| MSTRG. 30363. 7  | coding    | 0. 307      | 180  | 5763 | 6569 |
| MSTRG. 30365. 1  | coding    | 0. 539      | 0    | 1257 | 1973 |
| MSTRG. 30367. 1  | coding    | 0. 379      | 321  | 1479 | 1684 |
| MSTRG. 30367. 4  | coding    | 0. 417      | 354  | 1077 | 1282 |
| MSTRG. 30368. 7  | coding    | 0. 396      | 0    | 795  | 1038 |
| MSTRG. 30368. 4  | coding    | 0. 35       | 0    | 948  | 1190 |
| MSTRG. 30368. 9  | coding    | 0. 354      | 63   | 939  | 1181 |
| MSTRG. 30368. 10 | coding    | 0. 351      | 27   | 918  | 1158 |
| MSTRG. 30375. 1  | coding    | 0. 377      | 2487 | 4080 | 4672 |

|                  |           |             |      |      |       |
|------------------|-----------|-------------|------|------|-------|
| MSTRG. 30375. 5  | coding    | 0. 378      | 738  | 2073 | 2666  |
| MSTRG. 30375. 6  | coding    | 0. 352      | 738  | 1566 | 2649  |
| MSTRG. 30375. 9  | coding    | 0. 378      | 2826 | 4161 | 4752  |
| MSTRG. 30375. 7  | coding    | 0. 377      | 801  | 2394 | 2987  |
| MSTRG. 30375. 8  | coding    | 0. 378      | 762  | 2373 | 2964  |
| MSTRG. 30375. 12 | coding    | 0. 352      | 456  | 1290 | 2372  |
| MSTRG. 30375. 11 | coding    | 0. 373      | 3981 | 5577 | 6169  |
| MSTRG. 30375. 14 | coding    | 0. 38       | 231  | 1584 | 2175  |
| MSTRG. 30375. 15 | coding    | 0. 376      | 396  | 1731 | 2322  |
| MSTRG. 30378. 1  | coding    | 0. 364      | 846  | 1809 | 5077  |
| MSTRG. 30371. 1  | noncoding | -0. 0786432 | 474  | 1188 | 1837  |
| MSTRG. 30371. 2  | noncoding | -0. 0475136 | 0    | 273  | 814   |
| MSTRG. 30372. 1  | noncoding | -0. 24576   | 237  | 264  | 418   |
| MSTRG. 30382. 2  | noncoding | -0. 045056  | 225  | 264  | 419   |
| MSTRG. 30386. 3  | coding    | 0. 285      | 495  | 1350 | 2171  |
| MSTRG. 30388. 1  | noncoding | -0. 038912  | 0    | 87   | 327   |
| MSTRG. 30386. 5  | coding    | 0. 327      | 81   | 1275 | 2087  |
| MSTRG. 30386. 6  | coding    | 0. 298      | 81   | 1164 | 1434  |
| MSTRG. 30386. 8  | coding    | 0. 29       | 441  | 1599 | 1771  |
| MSTRG. 30393. 2  | coding    | 0. 185      | 279  | 1854 | 3221  |
| MSTRG. 30393. 8  | coding    | 0. 176      | 198  | 1701 | 2552  |
| MSTRG. 30393. 5  | coding    | 0. 181      | 168  | 1767 | 2616  |
| MSTRG. 30393. 9  | coding    | 0. 236      | 1044 | 2082 | 2932  |
| MSTRG. 30393. 7  | coding    | 0. 185      | 129  | 1704 | 2553  |
| MSTRG. 30393. 3  | coding    | 0. 18       | 546  | 2025 | 2874  |
| MSTRG. 30394. 1  | noncoding | -0. 0200704 | 1986 | 2088 | 3838  |
| MSTRG. 30395. 1  | noncoding | -0. 049152  | 1005 | 1095 | 2231  |
| MSTRG. 30398. 2  | noncoding | -0. 118784  | 249  | 327  | 990   |
| MSTRG. 30398. 3  | noncoding | -0. 114688  | 57   | 126  | 830   |
| MSTRG. 30399. 3  | coding    | 0. 359      | 51   | 5748 | 5959  |
| MSTRG. 30403. 3  | coding    | 0. 487      | 15   | 3156 | 10408 |
| MSTRG. 30403. 4  | coding    | 0. 496      | 0    | 3135 | 10384 |
| MSTRG. 30403. 5  | coding    | 0. 483      | 24   | 3141 | 4679  |
| MSTRG. 30403. 6  | coding    | 0. 475      | 2376 | 5325 | 6845  |
| MSTRG. 30404. 1  | noncoding | -0. 1224704 | 0    | 18   | 559   |
| MSTRG. 30416. 1  | noncoding | -0. 0086016 | 483  | 591  | 1001  |
| MSTRG. 30419. 5  | coding    | 0. 054      | 2394 | 2553 | 3114  |
| MSTRG. 30409. 1  | coding    | 0. 214      | 303  | 999  | 1180  |
| MSTRG. 30409. 2  | coding    | 0. 212      | 153  | 837  | 1008  |
| MSTRG. 30410. 1  | noncoding | -0. 065536  | 165  | 195  | 472   |
| MSTRG. 30411. 3  | coding    | 0. 233      | 219  | 1029 | 1184  |
| MSTRG. 30411. 4  | coding    | 0. 231      | 249  | 1044 | 1199  |
| MSTRG. 30411. 2  | coding    | 0. 23       | 192  | 987  | 1144  |
| MSTRG. 30411. 6  | coding    | 0. 23       | 81   | 882  | 1131  |
| MSTRG. 30411. 5  | coding    | 0. 226      | 495  | 1299 | 1551  |
| MSTRG. 30408. 1  | noncoding | -0. 0503808 | 21   | 636  | 1544  |
| MSTRG. 30436. 1  | noncoding | -0. 0495616 | 1080 | 1962 | 2115  |
| MSTRG. 30437. 1  | noncoding | -0. 0454656 | 138  | 504  | 1956  |
| MSTRG. 30438. 1  | coding    | 0. 279      | 21   | 3075 | 5729  |
| MSTRG. 30439. 1  | coding    | 0. 069      | 8055 | 8709 | 13213 |
| MSTRG. 30442. 1  | coding    | 0. 45       | 0    | 2646 | 3485  |
| MSTRG. 30442. 2  | coding    | 0. 294      | 69   | 459  | 614   |
| MSTRG. 30442. 3  | coding    | 0. 296      | 18   | 321  | 476   |
| MSTRG. 30444. 2  | coding    | 0. 375      | 2223 | 3234 | 3458  |

|                  |           |             |       |       |       |
|------------------|-----------|-------------|-------|-------|-------|
| MSTRG. 30445. 2  | coding    | 0. 34       | 285   | 1737  | 2112  |
| MSTRG. 30448. 1  | noncoding | -0. 0356352 | 36    | 3972  | 4915  |
| MSTRG. 30451. 1  | coding    | 0. 481      | 0     | 492   | 783   |
| MSTRG. 30453. 3  | coding    | 0. 492      | 0     | 3219  | 3387  |
| MSTRG. 30453. 4  | coding    | 0. 567      | 510   | 3213  | 3383  |
| MSTRG. 30453. 5  | coding    | 0. 58       | 975   | 3438  | 4710  |
| MSTRG. 30456. 2  | noncoding | -0. 1040384 | 0     | 600   | 756   |
| MSTRG. 30456. 1  | coding    | 0. 37       | 0     | 759   | 978   |
| MSTRG. 30456. 7  | noncoding | -0. 0958464 | 0     | 867   | 1023  |
| MSTRG. 30456. 4  | noncoding | -0. 0688128 | 60    | 1029  | 1183  |
| MSTRG. 30438. 2  | noncoding | -0. 12288   | 516   | 579   | 974   |
| MSTRG. 30426. 1  | noncoding | -0. 02048   | 39    | 60    | 462   |
| MSTRG. 30467. 1  | noncoding | -0. 1335296 | 0     | 27    | 507   |
| MSTRG. 30469. 1  | noncoding | -0. 1224704 | 0     | 21    | 321   |
| MSTRG. 30483. 1  | noncoding | -0. 0131072 | 729   | 867   | 1501  |
| MSTRG. 30496. 1  | noncoding | -0. 0827392 | 0     | 117   | 5874  |
| MSTRG. 30496. 2  | noncoding | -0. 0651264 | 15    | 642   | 9911  |
| MSTRG. 30497. 1  | noncoding | -0. 135168  | 639   | 726   | 3978  |
| MSTRG. 30497. 2  | coding    | 0. 085      | 0     | 783   | 4088  |
| MSTRG. 30496. 3  | noncoding | -0. 0057344 | 2148  | 2298  | 13586 |
| MSTRG. 30473. 1  | coding    | 0. 053      | 396   | 582   | 852   |
| MSTRG. 30475. 10 | coding    | 0. 147      | 10470 | 12474 | 13244 |
| MSTRG. 30475. 11 | coding    | 0. 151      | 2580  | 4488  | 5260  |
| MSTRG. 30476. 1  | noncoding | -0. 0618496 | 243   | 258   | 769   |
| MSTRG. 30479. 1  | noncoding | -0. 0004096 | 480   | 612   | 1025  |
| MSTRG. 30481. 1  | coding    | 0. 154      | 96    | 759   | 1750  |
| MSTRG. 30481. 2  | coding    | 0. 154      | 96    | 759   | 3606  |
| MSTRG. 30481. 3  | coding    | 0. 148      | 39    | 594   | 898   |
| MSTRG. 30477. 2  | coding    | 0. 238      | 75    | 795   | 1893  |
| MSTRG. 30503. 1  | coding    | 0. 332      | 984   | 4494  | 7301  |
| MSTRG. 30505. 4  | coding    | 0. 084      | 468   | 1107  | 1358  |
| MSTRG. 30506. 1  | coding    | 0. 095      | 444   | 627   | 3372  |
| MSTRG. 30506. 4  | noncoding | -0. 0671744 | 0     | 828   | 2266  |
| MSTRG. 30507. 2  | coding    | 0. 067      | 660   | 1446  | 4352  |
| MSTRG. 30518. 1  | coding    | 0. 194      | 312   | 2346  | 2676  |
| MSTRG. 30518. 2  | coding    | 0. 194      | 237   | 2271  | 2597  |
| MSTRG. 30518. 6  | coding    | 0. 193      | 234   | 2289  | 2620  |
| MSTRG. 30517. 2  | coding    | 0. 028      | 591   | 1038  | 2256  |
| MSTRG. 30522. 5  | noncoding | -0. 0393216 | 4386  | 4725  | 7163  |
| MSTRG. 30522. 6  | coding    | 0. 172      | 4794  | 5490  | 5643  |
| MSTRG. 30523. 1  | noncoding | -0. 0417792 | 14763 | 15054 | 18491 |
| MSTRG. 30524. 1  | noncoding | -0. 08192   | 2892  | 2958  | 5876  |
| MSTRG. 30525. 1  | coding    | 0. 356      | 1746  | 6813  | 7015  |
| MSTRG. 30529. 1  | coding    | 0. 135      | 0     | 1488  | 3864  |
| MSTRG. 30530. 1  | noncoding | -0. 065536  | 1896  | 1968  | 5720  |
| MSTRG. 30530. 2  | noncoding | -0. 065536  | 918   | 990   | 4390  |
| MSTRG. 30530. 3  | noncoding | -0. 065536  | 918   | 990   | 1989  |
| MSTRG. 30531. 3  | coding    | 0. 071      | 498   | 3309  | 7062  |
| MSTRG. 30536. 1  | noncoding | -0. 131072  | 30    | 102   | 376   |
| MSTRG. 30539. 1  | noncoding | -0. 0339968 | 0     | 168   | 1558  |
| MSTRG. 30534. 2  | coding    | 0. 251      | 0     | 498   | 1345  |
| MSTRG. 30534. 3  | coding    | 0. 266      | 0     | 714   | 1614  |
| MSTRG. 30534. 4  | noncoding | -0. 0831488 | 0     | 165   | 4708  |
| MSTRG. 30547. 1  | coding    | 0. 06       | 852   | 1221  | 1574  |

|                  |           |             |       |       |       |
|------------------|-----------|-------------|-------|-------|-------|
| MSTRG. 30547. 2  | noncoding | -0. 0909312 | 8130  | 8766  | 8921  |
| MSTRG. 30547. 6  | coding    | 0. 345      | 0     | 303   | 3403  |
| MSTRG. 30547. 5  | coding    | 0. 345      | 0     | 303   | 3307  |
| MSTRG. 30547. 7  | noncoding | -0. 0692224 | 3540  | 3783  | 6367  |
| MSTRG. 30548. 1  | noncoding | -0. 004096  | 192   | 336   | 3924  |
| MSTRG. 30548. 2  | noncoding | -0. 012288  | 3867  | 3984  | 8423  |
| MSTRG. 30548. 3  | noncoding | -0. 04096   | 72    | 141   | 843   |
| MSTRG. 30549. 1  | noncoding | -0. 0475136 | 4059  | 4260  | 4583  |
| MSTRG. 30550. 1  | noncoding | -0. 0458752 | 597   | 738   | 3165  |
| MSTRG. 30551. 1  | noncoding | -0. 3072    | 1800  | 1818  | 2364  |
| MSTRG. 30553. 1  | noncoding | -0. 049152  | 1119  | 1233  | 2445  |
| MSTRG. 30554. 1  | noncoding | -0. 131072  | 2193  | 2289  | 3351  |
| MSTRG. 30555. 1  | noncoding | -0. 008192  | 759   | 891   | 1506  |
| MSTRG. 30556. 1  | coding    | 0. 072      | 570   | 792   | 2391  |
| MSTRG. 30556. 2  | noncoding | -0. 06144   | 1290  | 1383  | 1539  |
| MSTRG. 30545. 1  | noncoding | -0. 049152  | 36    | 69    | 318   |
| MSTRG. 30559. 1  | coding    | 0. 259      | 225   | 822   | 1248  |
| MSTRG. 30559. 3  | coding    | 0. 259      | 90    | 687   | 1110  |
| MSTRG. 30561. 2  | coding    | 0. 243      | 0     | 1554  | 2272  |
| MSTRG. 30561. 3  | coding    | 0. 161      | 4827  | 6609  | 7329  |
| MSTRG. 30562. 2  | coding    | 0. 149      | 117   | 1788  | 3414  |
| MSTRG. 30565. 1  | coding    | 0. 144      | 207   | 1215  | 8182  |
| MSTRG. 30565. 2  | coding    | 0. 689      | 0     | 831   | 9904  |
| MSTRG. 30565. 4  | coding    | 0. 144      | 687   | 1695  | 3923  |
| MSTRG. 30566. 1  | noncoding | -0. 098304  | 732   | 777   | 1267  |
| MSTRG. 30569. 1  | noncoding | -0. 0352256 | 3261  | 3774  | 4089  |
| MSTRG. 30571. 1  | noncoding | -0. 04096   | 93    | 108   | 465   |
| MSTRG. 30572. 1  | noncoding | -0. 008192  | 57    | 120   | 736   |
| MSTRG. 30575. 1  | coding    | 0. 118      | 624   | 1416  | 3916  |
| MSTRG. 30575. 2  | coding    | 0. 087      | 207   | 1722  | 2462  |
| MSTRG. 30575. 3  | coding    | 0. 048      | 774   | 936   | 1092  |
| MSTRG. 30575. 5  | noncoding | -0. 032768  | 2046  | 2178  | 2332  |
| MSTRG. 30576. 1  | noncoding | -0. 1024    | 483   | 516   | 684   |
| MSTRG. 30583. 2  | coding    | 0. 194      | 180   | 1410  | 6872  |
| MSTRG. 30583. 3  | coding    | 0. 194      | 180   | 1410  | 5066  |
| MSTRG. 30583. 4  | coding    | 0. 191      | 180   | 1521  | 4960  |
| MSTRG. 30584. 1  | coding    | 0. 059      | 1743  | 2481  | 4063  |
| MSTRG. 30595. 3  | noncoding | -0. 0425984 | 3939  | 4656  | 4868  |
| MSTRG. 30595. 5  | noncoding | -0. 024576  | 996   | 1281  | 1434  |
| MSTRG. 30595. 4  | noncoding | -0. 0323584 | 1017  | 1308  | 1464  |
| MSTRG. 30596. 1  | coding    | 0. 113      | 348   | 3138  | 4665  |
| MSTRG. 30597. 1  | coding    | 0. 186      | 0     | 1896  | 2122  |
| MSTRG. 30597. 3  | coding    | 0. 181      | 0     | 1890  | 2815  |
| MSTRG. 30597. 5  | coding    | 0. 181      | 0     | 1884  | 2170  |
| MSTRG. 30599. 4  | coding    | 0. 14       | 0     | 2826  | 12264 |
| MSTRG. 30614. 8  | coding    | 0. 292      | 561   | 2814  | 3333  |
| MSTRG. 30616. 7  | coding    | 0. 148      | 1878  | 2718  | 5825  |
| MSTRG. 30616. 3  | coding    | 0. 126      | 651   | 2040  | 5148  |
| MSTRG. 30616. 6  | coding    | 0. 131      | 651   | 2040  | 5148  |
| MSTRG. 30617. 1  | noncoding | -0. 016384  | 3327  | 3429  | 5582  |
| MSTRG. 30616. 8  | coding    | 0. 086      | 3     | 150   | 1400  |
| MSTRG. 30616. 9  | coding    | 0. 03       | 11622 | 12081 | 15066 |
| MSTRG. 30616. 10 | coding    | 0. 03       | 15510 | 15969 | 18157 |
| MSTRG. 30618. 1  | noncoding | -0. 012288  | 180   | 306   | 518   |

|                  |           |             |       |       |       |
|------------------|-----------|-------------|-------|-------|-------|
| MSTRG. 30620. 1  | coding    | 0. 256      | 0     | 1023  | 1501  |
| MSTRG. 30620. 3  | coding    | 0. 256      | 0     | 1023  | 1221  |
| MSTRG. 30623. 4  | coding    | 0. 428      | 0     | 2031  | 2520  |
| MSTRG. 30623. 5  | coding    | 0. 37       | 0     | 1608  | 7750  |
| MSTRG. 30624. 1  | noncoding | -0. 0344064 | 252   | 435   | 641   |
| MSTRG. 30625. 1  | coding    | 0. 262      | 231   | 1731  | 1954  |
| MSTRG. 30625. 2  | coding    | 0. 264      | 372   | 1875  | 2100  |
| MSTRG. 30625. 3  | coding    | 0. 262      | 357   | 1857  | 2078  |
| MSTRG. 30625. 4  | coding    | 0. 288      | 369   | 1203  | 2325  |
| MSTRG. 30625. 5  | coding    | 0. 264      | 327   | 1830  | 2051  |
| MSTRG. 30625. 6  | coding    | 0. 262      | 345   | 1845  | 2066  |
| MSTRG. 30628. 1  | noncoding | -0. 028672  | 153   | 252   | 468   |
| MSTRG. 30631. 2  | noncoding | -0. 0671744 | 354   | 558   | 900   |
| MSTRG. 30643. 1  | coding    | 0. 128      | 63    | 1140  | 2407  |
| MSTRG. 30645. 3  | coding    | 0. 048      | 105   | 849   | 1349  |
| MSTRG. 30646. 1  | coding    | 0. 054      | 2526  | 3909  | 6960  |
| MSTRG. 30646. 2  | coding    | 0. 046      | 2526  | 4530  | 9726  |
| MSTRG. 30637. 1  | noncoding | -0. 0434176 | 18    | 255   | 783   |
| MSTRG. 30654. 4  | coding    | 0. 297      | 12    | 999   | 3095  |
| MSTRG. 30657. 1  | noncoding | -0. 002048  | 63    | 183   | 546   |
| MSTRG. 30658. 2  | coding    | 0. 147      | 699   | 1926  | 2918  |
| MSTRG. 30658. 3  | coding    | 0. 147      | 969   | 2196  | 3187  |
| MSTRG. 30658. 4  | coding    | 0. 147      | 171   | 1398  | 2379  |
| MSTRG. 30669. 1  | noncoding | -0. 098304  | 63    | 114   | 793   |
| MSTRG. 30668. 5  | coding    | 0. 112      | 531   | 738   | 1621  |
| MSTRG. 30668. 3  | coding    | 0. 109      | 810   | 1518  | 2752  |
| MSTRG. 30668. 4  | coding    | 0. 08       | 810   | 2202  | 2882  |
| MSTRG. 30668. 6  | coding    | 0. 095      | 531   | 2043  | 2397  |
| MSTRG. 30670. 1  | noncoding | -0. 02048   | 132   | 207   | 1619  |
| MSTRG. 30671. 10 | noncoding | -0. 0667648 | 2304  | 3087  | 3930  |
| MSTRG. 30676. 4  | coding    | 0. 271      | 282   | 1065  | 1521  |
| MSTRG. 30678. 1  | coding    | 0. 235      | 105   | 2943  | 6130  |
| MSTRG. 30685. 1  | coding    | 0. 228      | 1158  | 2019  | 4701  |
| MSTRG. 30685. 4  | coding    | 0. 262      | 1248  | 1971  | 4103  |
| MSTRG. 30685. 5  | coding    | 0. 208      | 762   | 2691  | 4823  |
| MSTRG. 30685. 6  | coding    | 0. 189      | 432   | 2580  | 4699  |
| MSTRG. 30685. 7  | coding    | 0. 21       | 36    | 1779  | 5598  |
| MSTRG. 30685. 8  | noncoding | -0. 0200704 | 309   | 807   | 2350  |
| MSTRG. 30685. 9  | coding    | 0. 059      | 5331  | 6765  | 13262 |
| MSTRG. 30685. 10 | coding    | 0. 059      | 12603 | 14037 | 17052 |
| MSTRG. 30685. 11 | coding    | 0. 084      | 1194  | 1872  | 2224  |
| MSTRG. 30685. 12 | noncoding | -0. 0364544 | 7407  | 7710  | 14699 |
| MSTRG. 30685. 13 | noncoding | -0. 0503808 | 3642  | 4044  | 7253  |
| MSTRG. 30685. 14 | noncoding | -0. 0135168 | 411   | 564   | 10175 |
| MSTRG. 30685. 15 | noncoding | -0. 0135168 | 399   | 552   | 6773  |
| MSTRG. 30688. 1  | noncoding | -0. 073728  | 249   | 321   | 787   |
| MSTRG. 30688. 2  | noncoding | -0. 01024   | 396   | 570   | 2374  |
| MSTRG. 30693. 1  | coding    | 0. 145      | 555   | 10266 | 11852 |
| MSTRG. 30693. 6  | coding    | 0. 143      | 0     | 5052  | 6414  |
| MSTRG. 30693. 2  | coding    | 0. 155      | 540   | 8427  | 9788  |
| MSTRG. 30693. 3  | coding    | 0. 155      | 540   | 8427  | 9788  |
| MSTRG. 30693. 4  | coding    | 0. 155      | 540   | 8427  | 9788  |
| MSTRG. 30693. 7  | coding    | 0. 146      | 513   | 9876  | 11234 |
| MSTRG. 30693. 9  | coding    | 0. 154      | 540   | 8079  | 9430  |



|                  |           |             |       |       |       |
|------------------|-----------|-------------|-------|-------|-------|
| MSTRG. 30695. 1  | noncoding | -0. 0319488 | 102   | 270   | 432   |
| MSTRG. 30698. 1  | noncoding | -0. 0139264 | 213   | 444   | 601   |
| MSTRG. 30698. 2  | noncoding | -0. 0147456 | 60    | 240   | 395   |
| MSTRG. 30699. 1  | noncoding | -0. 0610304 | 126   | 366   | 777   |
| MSTRG. 30701. 1  | noncoding | -0. 038912  | 783   | 996   | 3092  |
| MSTRG. 30703. 1  | noncoding | -0. 0290816 | 249   | 441   | 1717  |
| MSTRG. 30703. 2  | noncoding | -0. 0290816 | 39    | 231   | 1337  |
| MSTRG. 30704. 1  | noncoding | -0. 0249856 | 540   | 639   | 1820  |
| MSTRG. 30705. 2  | noncoding | -0. 0651264 | 0     | 705   | 1065  |
| MSTRG. 30706. 1  | noncoding | -0. 012288  | 84    | 219   | 732   |
| MSTRG. 30712. 1  | noncoding | -0. 0299008 | 654   | 1422  | 1810  |
| MSTRG. 30712. 2  | noncoding | -0. 0221184 | 90    | 1599  | 1974  |
| MSTRG. 30716. 1  | coding    | 0. 534      | 132   | 2046  | 3488  |
| MSTRG. 30718. 1  | noncoding | -0. 0569344 | 36    | 1374  | 10259 |
| MSTRG. 30718. 2  | noncoding | -0. 0663552 | 6     | 1149  | 7699  |
| MSTRG. 30719. 1  | noncoding | -0. 02048   | 150   | 459   | 819   |
| MSTRG. 30720. 5  | noncoding | -0. 1069056 | 0     | 486   | 958   |
| MSTRG. 30720. 4  | coding    | 0. 428      | 0     | 1587  | 2300  |
| MSTRG. 30720. 3  | coding    | 0. 465      | 162   | 1575  | 2287  |
| MSTRG. 30720. 2  | coding    | 0. 357      | 33    | 915   | 1389  |
| MSTRG. 30736. 1  | coding    | 0. 481      | 0     | 8112  | 8267  |
| MSTRG. 30736. 3  | coding    | 0. 496      | 0     | 4077  | 6788  |
| MSTRG. 30736. 4  | coding    | 0. 51       | 0     | 6321  | 7575  |
| MSTRG. 30737. 1  | noncoding | -0. 0208896 | 63    | 69    | 364   |
| MSTRG. 30725. 2  | coding    | 0. 427      | 0     | 834   | 3463  |
| MSTRG. 30727. 1  | noncoding | -0. 0704512 | 117   | 162   | 916   |
| MSTRG. 30728. 1  | noncoding | -0. 0237568 | 0     | 843   | 2377  |
| MSTRG. 30740. 1  | coding    | 0. 36       | 0     | 456   | 1429  |
| MSTRG. 30741. 1  | noncoding | -0. 0458752 | 30    | 243   | 398   |
| MSTRG. 30743. 6  | noncoding | -0. 0557056 | 0     | 417   | 1642  |
| MSTRG. 30743. 4  | noncoding | -0. 063488  | 0     | 210   | 1269  |
| MSTRG. 30743. 8  | coding    | 0. 3        | 297   | 960   | 1180  |
| MSTRG. 30743. 9  | coding    | 0. 283      | 0     | 1155  | 2017  |
| MSTRG. 30743. 10 | coding    | 0. 295      | 0     | 1530  | 2361  |
| MSTRG. 30743. 7  | coding    | 0. 289      | 0     | 1554  | 3631  |
| MSTRG. 30747. 5  | coding    | 0. 207      | 1836  | 2196  | 3266  |
| MSTRG. 30747. 6  | noncoding | -0. 0905216 | 1299  | 1488  | 2529  |
| MSTRG. 30758. 2  | coding    | 0. 205      | 0     | 1143  | 1520  |
| MSTRG. 30759. 1  | noncoding | -0. 014336  | 306   | 477   | 835   |
| MSTRG. 30760. 1  | noncoding | -0. 118784  | 852   | 1347  | 1583  |
| MSTRG. 30760. 3  | noncoding | -0. 0274432 | 1935  | 2139  | 2292  |
| MSTRG. 30760. 4  | noncoding | -0. 0610304 | 2991  | 3543  | 8813  |
| MSTRG. 30760. 5  | coding    | 0. 487      | 750   | 2202  | 3059  |
| MSTRG. 30760. 2  | noncoding | -0. 1052672 | 750   | 3585  | 7766  |
| MSTRG. 30762. 1  | noncoding | -0. 016384  | 2589  | 2721  | 5143  |
| MSTRG. 30763. 1  | noncoding | -0. 04096   | 2595  | 2763  | 4857  |
| MSTRG. 30760. 7  | noncoding | -0. 0663552 | 14250 | 14670 | 18873 |
| MSTRG. 30760. 8  | noncoding | -0. 0016384 | 195   | 339   | 2921  |
| MSTRG. 30765. 1  | noncoding | -0. 0393216 | 1104  | 1767  | 2745  |
| MSTRG. 30768. 1  | noncoding | -0. 06144   | 33    | 36    | 203   |
| MSTRG. 30771. 1  | noncoding | -0. 032768  | 1113  | 1635  | 4301  |
| MSTRG. 30772. 1  | coding    | 0. 403      | 0     | 438   | 5520  |
| MSTRG. 30772. 2  | coding    | 0. 405      | 0     | 429   | 5349  |
| MSTRG. 30753. 7  | coding    | 0. 463      | 297   | 2679  | 6106  |

|                 |           |             |      |      |       |
|-----------------|-----------|-------------|------|------|-------|
| MSTRG. 30757. 1 | noncoding | -0. 0188416 | 2409 | 2595 | 2997  |
| MSTRG. 30774. 1 | coding    | 0. 313      | 330  | 3996 | 4151  |
| MSTRG. 30776. 1 | noncoding | -0. 0647168 | 174  | 243  | 567   |
| MSTRG. 30787. 1 | coding    | 0. 235      | 258  | 1698 | 3049  |
| MSTRG. 30791. 1 | noncoding | -0. 1302528 | 0    | 9    | 239   |
| MSTRG. 30792. 2 | noncoding | -0. 0237568 | 0    | 60   | 1084  |
| MSTRG. 30793. 1 | noncoding | -0. 0065536 | 30   | 339  | 493   |
| MSTRG. 30792. 3 | noncoding | -0. 19456   | 318  | 348  | 3017  |
| MSTRG. 30792. 4 | noncoding | -0. 002048  | 3009 | 3156 | 3946  |
| MSTRG. 30792. 5 | noncoding | -0. 008192  | 321  | 411  | 565   |
| MSTRG. 30792. 6 | noncoding | -0. 0086016 | 285  | 291  | 448   |
| MSTRG. 30794. 1 | noncoding | -0. 258048  | 294  | 315  | 472   |
| MSTRG. 30795. 4 | noncoding | -0. 0479232 | 159  | 390  | 5310  |
| MSTRG. 30831. 1 | noncoding | -0. 0135168 | 0    | 126  | 699   |
| MSTRG. 30832. 2 | noncoding | -0. 147456  | 114  | 129  | 416   |
| MSTRG. 30798. 1 | noncoding | -0. 053248  | 99   | 207  | 362   |
| MSTRG. 30801. 1 | coding    | 0. 223      | 0    | 231  | 387   |
| MSTRG. 30802. 1 | noncoding | -0. 012288  | 219  | 336  | 690   |
| MSTRG. 30803. 2 | noncoding | -0. 0684032 | 138  | 501  | 656   |
| MSTRG. 30805. 2 | coding    | 0. 21       | 513  | 1290 | 3344  |
| MSTRG. 30805. 4 | coding    | 0. 24       | 0    | 927  | 2471  |
| MSTRG. 30806. 1 | coding    | 0. 106      | 555  | 732  | 2282  |
| MSTRG. 30807. 1 | noncoding | -0. 0126976 | 1425 | 1761 | 4266  |
| MSTRG. 30808. 1 | noncoding | -0. 028672  | 7155 | 7320 | 16030 |
| MSTRG. 30808. 2 | coding    | 0. 001      | 1620 | 1800 | 4553  |
| MSTRG. 30805. 6 | noncoding | -0. 0057344 | 1752 | 1902 | 4459  |
| MSTRG. 30809. 1 | coding    | 0. 053      | 351  | 516  | 841   |
| MSTRG. 30812. 1 | coding    | 0. 158      | 342  | 1203 | 1674  |
| MSTRG. 30812. 2 | coding    | 0. 073      | 0    | 3594 | 4325  |
| MSTRG. 30812. 4 | coding    | 0. 105      | 1548 | 3588 | 4059  |
| MSTRG. 30815. 2 | coding    | 0. 466      | 0    | 105  | 259   |
| MSTRG. 30817. 1 | noncoding | -0. 0057344 | 6906 | 7101 | 7727  |
| MSTRG. 30826. 2 | coding    | 0. 26       | 213  | 951  | 2112  |
| MSTRG. 30826. 3 | coding    | 0. 242      | 213  | 741  | 2090  |
| MSTRG. 30826. 5 | coding    | 0. 26       | 474  | 1212 | 1615  |
| MSTRG. 30826. 6 | coding    | 0. 242      | 3462 | 3990 | 4581  |
| MSTRG. 30833. 1 | noncoding | -0. 126976  | 234  | 330  | 629   |
| MSTRG. 30866. 1 | noncoding | -0. 0499712 | 693  | 864  | 1323  |
| MSTRG. 30867. 1 | noncoding | -0. 04096   | 2877 | 2994 | 5702  |
| MSTRG. 30866. 2 | noncoding | -0. 057344  | 603  | 678  | 1064  |
| MSTRG. 30868. 1 | noncoding | -0. 0229376 | 7023 | 7179 | 9456  |
| MSTRG. 30866. 3 | noncoding | -0. 0335872 | 3171 | 3351 | 6508  |
| MSTRG. 30866. 4 | coding    | 0. 048      | 225  | 780  | 2621  |
| MSTRG. 30866. 5 | noncoding | -0. 0147456 | 6966 | 7314 | 16177 |
| MSTRG. 30866. 6 | noncoding | -0. 0147456 | 6951 | 7299 | 9949  |
| MSTRG. 30866. 7 | coding    | 0. 028      | 1401 | 1857 | 5214  |
| MSTRG. 30866. 8 | coding    | 0. 028      | 7677 | 8133 | 10825 |
| MSTRG. 30835. 1 | noncoding | -0. 0172032 | 1122 | 1275 | 2952  |
| MSTRG. 30836. 1 | noncoding | -0. 032768  | 849  | 957  | 2331  |
| MSTRG. 30836. 4 | noncoding | -0. 028672  | 2184 | 2409 | 2631  |
| MSTRG. 30836. 3 | noncoding | -0. 02048   | 483  | 594  | 1943  |
| MSTRG. 30836. 2 | noncoding | -0. 0004096 | 1461 | 1587 | 2936  |
| MSTRG. 30836. 5 | noncoding | -0. 028672  | 1191 | 1416 | 1621  |
| MSTRG. 30836. 6 | noncoding | -0. 032768  | 294  | 402  | 1722  |

|                  |           |             |       |       |       |
|------------------|-----------|-------------|-------|-------|-------|
| MSTRG. 30837. 1  | noncoding | -0. 069632  | 3     | 81    | 1230  |
| MSTRG. 30889. 5  | coding    | 0. 123      | 480   | 4098  | 4267  |
| MSTRG. 30889. 7  | coding    | 0. 238      | 444   | 7800  | 8249  |
| MSTRG. 30889. 10 | noncoding | -0. 028672  | 7419  | 7548  | 7831  |
| MSTRG. 30889. 14 | noncoding | -0. 04096   | 1614  | 1641  | 4424  |
| MSTRG. 30892. 1  | noncoding | -0. 045056  | 861   | 888   | 2922  |
| MSTRG. 30892. 2  | noncoding | -0. 036864  | 753   | 819   | 3615  |
| MSTRG. 30892. 3  | noncoding | -0. 045056  | 321   | 348   | 1501  |
| MSTRG. 30892. 4  | noncoding | -0. 0831488 | 3546  | 3813  | 8105  |
| MSTRG. 30893. 1  | noncoding | -0. 01024   | 1662  | 1803  | 7206  |
| MSTRG. 30894. 1  | noncoding | -0. 0331776 | 23310 | 23568 | 24353 |
| MSTRG. 30889. 16 | noncoding | -0. 032768  | 816   | 912   | 3650  |
| MSTRG. 30889. 17 | noncoding | -0. 0499712 | 3216  | 4113  | 22243 |
| MSTRG. 30895. 1  | noncoding | -0. 0446464 | 0     | 237   | 1144  |
| MSTRG. 30889. 19 | coding    | 0. 203      | 0     | 429   | 1514  |
| MSTRG. 30889. 18 | coding    | 0. 202      | 0     | 480   | 3863  |
| MSTRG. 30896. 1  | noncoding | -0. 0421888 | 0     | 72    | 1605  |
| MSTRG. 30889. 20 | coding    | 0. 099      | 723   | 969   | 3182  |
| MSTRG. 30897. 1  | noncoding | -0. 0249856 | 1668  | 1836  | 2311  |
| MSTRG. 30889. 21 | coding    | 0. 457      | 264   | 3180  | 3654  |
| MSTRG. 30871. 1  | noncoding | -0. 0372736 | 336   | 513   | 1473  |
| MSTRG. 30874. 1  | noncoding | -0. 0667648 | 3321  | 3933  | 4087  |
| MSTRG. 30874. 2  | noncoding | -0. 073728  | 9354  | 9891  | 10047 |
| MSTRG. 30876. 3  | noncoding | -0. 0999424 | 0     | 201   | 993   |
| MSTRG. 30877. 4  | coding    | 0. 196      | 1296  | 3525  | 4475  |
| MSTRG. 30877. 6  | coding    | 0. 188      | 267   | 2787  | 3738  |
| MSTRG. 30878. 2  | coding    | 0. 25       | 57    | 2442  | 9166  |
| MSTRG. 30878. 3  | coding    | 0. 266      | 2472  | 5121  | 11921 |
| MSTRG. 30880. 2  | coding    | 0. 329      | 303   | 1359  | 5098  |
| MSTRG. 30883. 2  | coding    | 0. 158      | 126   | 942   | 1098  |
| MSTRG. 30882. 1  | noncoding | -0. 0192512 | 54    | 69    | 457   |
| MSTRG. 30888. 2  | coding    | 0. 126      | 231   | 891   | 1181  |
| MSTRG. 30899. 2  | coding    | 0. 37       | 702   | 1464  | 1902  |
| MSTRG. 30900. 4  | coding    | 0. 071      | 981   | 1197  | 4355  |
| MSTRG. 30900. 5  | coding    | 0. 071      | 1698  | 1914  | 5072  |
| MSTRG. 30900. 6  | coding    | 0. 092      | 1560  | 3075  | 6234  |
| MSTRG. 30900. 9  | coding    | 0. 071      | 891   | 1107  | 4118  |
| MSTRG. 30900. 7  | coding    | 0. 126      | 0     | 1572  | 4582  |
| MSTRG. 30900. 8  | coding    | 0. 09       | 627   | 2118  | 5150  |
| MSTRG. 30900. 10 | coding    | 0. 099      | 192   | 1737  | 4766  |
| MSTRG. 30905. 4  | coding    | 0. 204      | 1923  | 2499  | 3081  |
| MSTRG. 30906. 1  | noncoding | -0. 0004096 | 0     | 0     | 345   |
| MSTRG. 30907. 2  | coding    | 0. 071      | 720   | 1173  | 1599  |
| MSTRG. 30908. 1  | coding    | 0. 017      | 528   | 1287  | 2061  |
| MSTRG. 30909. 1  | coding    | 0. 033      | 1458  | 2418  | 3600  |
| MSTRG. 30909. 2  | coding    | 0. 033      | 1428  | 2388  | 2893  |
| MSTRG. 30909. 3  | coding    | 0. 033      | 1458  | 2418  | 2799  |
| MSTRG. 30909. 4  | coding    | 0. 033      | 1458  | 2418  | 3887  |
| MSTRG. 30909. 5  | coding    | 0. 033      | 1458  | 2418  | 3769  |
| MSTRG. 30909. 6  | coding    | 0. 033      | 1458  | 2418  | 3727  |
| MSTRG. 30910. 2  | coding    | 0. 084      | 678   | 2658  | 5075  |
| MSTRG. 30910. 3  | coding    | 0. 109      | 972   | 2607  | 5002  |
| MSTRG. 30910. 4  | coding    | 0. 106      | 1032  | 2610  | 4790  |
| MSTRG. 30910. 5  | coding    | 0. 22       | 882   | 1485  | 9927  |

|                  |           |             |      |      |      |
|------------------|-----------|-------------|------|------|------|
| MSTRG. 30910. 8  | coding    | 0. 127      | 606  | 1566 | 7829 |
| MSTRG. 30910. 9  | coding    | 0. 202      | 363  | 735  | 5143 |
| MSTRG. 30911. 3  | noncoding | -0. 04096   | 426  | 429  | 735  |
| MSTRG. 30914. 1  | noncoding | -0. 057344  | 51   | 69   | 224  |
| MSTRG. 30920. 1  | noncoding | -0. 0434176 | 627  | 837  | 1010 |
| MSTRG. 30937. 1  | noncoding | -0. 04096   | 843  | 972  | 1667 |
| MSTRG. 30937. 2  | coding    | 0. 17       | 285  | 507  | 1217 |
| MSTRG. 30937. 5  | noncoding | -0. 0315392 | 987  | 1146 | 1656 |
| MSTRG. 30937. 6  | noncoding | -0. 0004096 | 2139 | 2241 | 5735 |
| MSTRG. 30937. 7  | noncoding | -0. 0004096 | 6156 | 6552 | 9844 |
| MSTRG. 30937. 8  | noncoding | -0. 008192  | 2115 | 2235 | 2392 |
| MSTRG. 30937. 9  | noncoding | -0. 167936  | 3294 | 3354 | 3509 |
| MSTRG. 30937. 10 | noncoding | -0. 167936  | 2667 | 2715 | 4147 |
| MSTRG. 30939. 1  | noncoding | -0. 0274432 | 42   | 210  | 1046 |
| MSTRG. 30943. 1  | coding    | 0. 222      | 27   | 1248 | 1402 |
| MSTRG. 30922. 1  | noncoding | -0. 1232896 | 345  | 984  | 1139 |
| MSTRG. 30922. 2  | noncoding | -0. 1253376 | 87   | 750  | 1088 |
| MSTRG. 30922. 3  | coding    | 0. 31       | 0    | 1458 | 1758 |
| MSTRG. 30945. 1  | noncoding | -0. 024576  | 1161 | 1296 | 1790 |
| MSTRG. 30948. 11 | coding    | 0. 093      | 165  | 2472 | 2726 |
| MSTRG. 30948. 8  | coding    | 0. 087      | 150  | 4842 | 5095 |
| MSTRG. 30948. 18 | coding    | 0. 087      | 1056 | 5751 | 6004 |
| MSTRG. 30948. 12 | coding    | 0. 079      | 243  | 6372 | 6626 |
| MSTRG. 30948. 13 | coding    | 0. 084      | 0    | 6531 | 6786 |
| MSTRG. 30948. 14 | coding    | 0. 081      | 0    | 6489 | 6744 |
| MSTRG. 30948. 15 | coding    | 0. 107      | 0    | 3258 | 7654 |
| MSTRG. 30948. 16 | coding    | 0. 077      | 243  | 6198 | 6452 |
| MSTRG. 30948. 9  | coding    | 0. 079      | 234  | 6462 | 6715 |
| MSTRG. 30948. 7  | coding    | 0. 082      | 66   | 6666 | 6921 |
| MSTRG. 30948. 10 | coding    | 0. 076      | 399  | 6717 | 6971 |
| MSTRG. 30948. 17 | coding    | 0. 081      | 144  | 6438 | 6693 |
| MSTRG. 30948. 6  | coding    | 0. 085      | 144  | 6555 | 6810 |
| MSTRG. 30948. 19 | coding    | 0. 002      | 1308 | 1602 | 2228 |
| MSTRG. 30949. 1  | noncoding | -0. 159744  | 1026 | 1101 | 2839 |
| MSTRG. 30950. 2  | coding    | 0. 134      | 1410 | 5376 | 5594 |
| MSTRG. 30951. 1  | noncoding | -0. 0548864 | 0    | 3    | 246  |
| MSTRG. 30952. 1  | noncoding | -0. 0331776 | 69   | 93   | 274  |
| MSTRG. 30950. 5  | coding    | 0. 241      | 1485 | 3258 | 3476 |
| MSTRG. 30950. 7  | coding    | 0. 274      | 1944 | 3363 | 3583 |
| MSTRG. 30929. 3  | coding    | 0. 145      | 510  | 2538 | 3562 |
| MSTRG. 30961. 3  | coding    | 0. 105      | 495  | 1224 | 2863 |
| MSTRG. 30961. 4  | coding    | 0. 105      | 318  | 1047 | 2687 |
| MSTRG. 30965. 1  | coding    | 0. 125      | 429  | 1980 | 3216 |
| MSTRG. 30965. 2  | coding    | 0. 134      | 0    | 1413 | 3797 |
| MSTRG. 30965. 3  | coding    | 0. 038      | 1647 | 2298 | 3530 |
| MSTRG. 30965. 4  | coding    | 0. 058      | 1641 | 2361 | 3554 |
| MSTRG. 30965. 6  | coding    | 0. 057      | 3174 | 3897 | 5089 |
| MSTRG. 30965. 5  | coding    | 0. 372      | 0    | 441  | 5218 |
| MSTRG. 30966. 1  | noncoding | -0. 0372736 | 534  | 558  | 731  |
| MSTRG. 30965. 8  | coding    | 0. 372      | 0    | 441  | 1634 |
| MSTRG. 30965. 9  | noncoding | -0. 0385024 | 2028 | 2148 | 4724 |
| MSTRG. 30965. 10 | noncoding | -0. 11264   | 0    | 534  | 3680 |
| MSTRG. 30967. 1  | noncoding | -0. 0643072 | 54   | 768  | 923  |
| MSTRG. 30967. 3  | noncoding | -0. 0397312 | 900  | 1089 | 1327 |

|                 |           |            |       |       |       |
|-----------------|-----------|------------|-------|-------|-------|
| MSTRG. 30971.1  | noncoding | -0.004096  | 186   | 450   | 607   |
| MSTRG. 30971.2  | noncoding | -0.0073728 | 249   | 462   | 617   |
| MSTRG. 30968.1  | noncoding | -0.004096  | 24    | 162   | 372   |
| MSTRG. 31004.1  | coding    | 0.11       | 366   | 1011  | 1549  |
| MSTRG. 31004.2  | coding    | 0.11       | 150   | 795   | 1365  |
| MSTRG. 31004.4  | coding    | 0.11       | 150   | 795   | 1366  |
| MSTRG. 31004.5  | coding    | 0.11       | 480   | 1125  | 1535  |
| MSTRG. 31006.1  | noncoding | -0.0589824 | 1581  | 1611  | 2004  |
| MSTRG. 31007.1  | noncoding | -0.0315392 | 2802  | 2991  | 3510  |
| MSTRG. 31011.1  | noncoding | -0.0212992 | 468   | 606   | 1066  |
| MSTRG. 31011.2  | noncoding | -0.0212992 | 468   | 606   | 915   |
| MSTRG. 31011.3  | noncoding | -0.0212992 | 468   | 606   | 1065  |
| MSTRG. 31011.4  | noncoding | -0.0212992 | 216   | 354   | 749   |
| MSTRG. 31011.5  | noncoding | -0.0212992 | 216   | 354   | 982   |
| MSTRG. 31015.3  | coding    | 0.405      | 16257 | 20547 | 20943 |
| MSTRG. 31015.4  | coding    | 0.402      | 30021 | 34311 | 34467 |
| MSTRG. 31015.5  | coding    | 0.403      | 7248  | 11529 | 11683 |
| MSTRG. 31015.6  | coding    | 0.402      | 26142 | 30426 | 30581 |
| MSTRG. 31021.2  | coding    | 0.115      | 0     | 1224  | 1918  |
| MSTRG. 31019.1  | noncoding | -0.1544192 | 0     | 81    | 368   |
| MSTRG. 31027.1  | noncoding | -0.0065536 | 135   | 423   | 2000  |
| MSTRG. 31029.2  | coding    | 0.124      | 312   | 966   | 2100  |
| MSTRG. 31030.1  | coding    | 0.096      | 0     | 342   | 3704  |
| MSTRG. 31035.1  | coding    | 0.209      | 357   | 993   | 1623  |
| MSTRG. 31035.4  | coding    | 0.284      | 0     | 282   | 937   |
| MSTRG. 31035.3  | coding    | 0.284      | 0     | 282   | 1134  |
| MSTRG. 31035.5  | coding    | 0.155      | 0     | 708   | 1338  |
| MSTRG. 31035.6  | coding    | 0.226      | 435   | 915   | 1545  |
| MSTRG. 31035.7  | coding    | 0.184      | 33    | 534   | 1165  |
| MSTRG. 31035.8  | coding    | 0.196      | 165   | 711   | 1341  |
| MSTRG. 31031.1  | noncoding | -0.02048   | 135   | 381   | 999   |
| MSTRG. 31036.2  | coding    | 0.145      | 0     | 807   | 4852  |
| MSTRG. 31043.1  | coding    | 0.114      | 0     | 813   | 1705  |
| MSTRG. 31044.1  | noncoding | -0.04096   | 57    | 144   | 970   |
| MSTRG. 31045.13 | coding    | 0.001      | 1305  | 1449  | 3164  |
| MSTRG. 31045.4  | coding    | 0.076      | 6243  | 6807  | 9373  |
| MSTRG. 31045.7  | coding    | 0.076      | 5661  | 6225  | 8792  |
| MSTRG. 31045.11 | coding    | 0.076      | 5838  | 6402  | 8969  |
| MSTRG. 31045.15 | coding    | 0.076      | 5925  | 6489  | 9055  |
| MSTRG. 31045.16 | noncoding | -0.0937984 | 0     | 225   | 1549  |
| MSTRG. 31045.8  | coding    | 0.076      | 5796  | 6360  | 8927  |
| MSTRG. 31045.14 | noncoding | -0.0028672 | 294   | 441   | 1266  |
| MSTRG. 31045.12 | coding    | 0.076      | 5547  | 6111  | 8679  |
| MSTRG. 31045.9  | coding    | 0.076      | 5592  | 6156  | 8724  |
| MSTRG. 31045.10 | coding    | 0.007      | 303   | 450   | 1276  |
| MSTRG. 31045.6  | coding    | 0.076      | 5652  | 6216  | 8782  |
| MSTRG. 31046.1  | noncoding | -0.06144   | 684   | 711   | 1535  |
| MSTRG. 31047.1  | noncoding | -0.036864  | 1206  | 1314  | 5227  |
| MSTRG. 31051.1  | noncoding | -0.057344  | 1044  | 1083  | 4830  |
| MSTRG. 31052.1  | noncoding | -0.036864  | 4059  | 4125  | 8530  |
| MSTRG. 31053.5  | coding    | 0.064      | 111   | 3762  | 3917  |
| MSTRG. 31058.1  | coding    | 0.219      | 291   | 1248  | 4935  |
| MSTRG. 31071.1  | noncoding | -0.0249856 | 417   | 525   | 940   |
| MSTRG. 31071.2  | noncoding | -0.008192  | 276   | 432   | 792   |

|                |           |            |      |      |       |
|----------------|-----------|------------|------|------|-------|
| MSTRG. 31083.2 | coding    | 0.207      | 1206 | 2865 | 3206  |
| MSTRG. 31105.3 | coding    | 0.357      | 141  | 1806 | 4788  |
| MSTRG. 31105.4 | coding    | 0.353      | 0    | 2283 | 5264  |
| MSTRG. 31111.2 | coding    | 0.119      | 0    | 576  | 1002  |
| MSTRG. 31112.1 | coding    | 0.144      | 0    | 828  | 1747  |
| MSTRG. 31116.2 | coding    | 0.262      | 0    | 711  | 1800  |
| MSTRG. 31116.3 | coding    | 0.227      | 486  | 4575 | 6591  |
| MSTRG. 31116.4 | coding    | 0.231      | 4641 | 7002 | 11669 |
| MSTRG. 31116.5 | coding    | 0.21       | 0    | 4785 | 5377  |
| MSTRG. 31117.1 | noncoding | -0.036864  | 207  | 267  | 549   |
| MSTRG. 31117.2 | noncoding | -0.126976  | 66   | 150  | 650   |
| MSTRG. 31116.6 | coding    | 0.172      | 0    | 2529 | 2734  |
| MSTRG. 31119.2 | coding    | 0.169      | 375  | 1431 | 2696  |
| MSTRG. 31120.8 | coding    | 0.405      | 0    | 2703 | 2993  |
| MSTRG. 31121.1 | noncoding | -0.0253952 | 510  | 759  | 914   |
| MSTRG. 31122.4 | noncoding | -0.1089536 | 0    | 402  | 9044  |
| MSTRG. 31122.3 | coding    | 0.36       | 0    | 2160 | 6752  |
| MSTRG. 31114.4 | coding    | 0.29       | 201  | 1269 | 4849  |
| MSTRG. 31125.1 | coding    | 0.183      | 0    | 294  | 3141  |
| MSTRG. 31125.2 | noncoding | -0.0282624 | 1956 | 2073 | 2500  |
| MSTRG. 31128.3 | coding    | 0.058      | 1269 | 1467 | 4121  |
| MSTRG. 31132.3 | noncoding | -0.0442368 | 0    | 129  | 2298  |
| MSTRG. 31134.3 | coding    | 0.119      | 0    | 771  | 1031  |
| MSTRG. 31134.4 | noncoding | -0.057344  | 87   | 111  | 460   |
| MSTRG. 31134.5 | coding    | 0.136      | 0    | 477  | 756   |
| MSTRG. 31134.6 | noncoding | -0.012288  | 15   | 204  | 2108  |
| MSTRG. 31133.1 | noncoding | -0.053248  | 201  | 288  | 549   |
| MSTRG. 31142.2 | coding    | 0.294      | 0    | 699  | 2762  |
| MSTRG. 31143.2 | coding    | 0.357      | 1146 | 2778 | 2942  |
| MSTRG. 31143.3 | coding    | 0.319      | 1482 | 2769 | 2932  |
| MSTRG. 31146.1 | coding    | 0.494      | 0    | 6000 | 7746  |
| MSTRG. 31146.2 | noncoding | -0.0872448 | 0    | 684  | 1665  |
| MSTRG. 31146.4 | noncoding | -0.0806912 | 0    | 774  | 1217  |
| MSTRG. 31146.3 | noncoding | -0.0806912 | 0    | 681  | 1123  |
| MSTRG. 31146.5 | noncoding | -0.0626688 | 63   | 1044 | 1197  |
| MSTRG. 31148.2 | coding    | 0.335      | 318  | 6357 | 8408  |
| MSTRG. 31149.2 | noncoding | -0.0262144 | 276  | 435  | 3886  |
| MSTRG. 31144.1 | coding    | 0.335      | 0    | 1464 | 3336  |
| MSTRG. 31144.2 | coding    | 0.351      | 0    | 1122 | 3129  |
| MSTRG. 31144.5 | noncoding | -0.0024576 | 1596 | 1731 | 2388  |
| MSTRG. 31144.6 | noncoding | -0.0147456 | 57   | 216  | 1170  |
| MSTRG. 31145.2 | coding    | 0.343      | 0    | 1764 | 2478  |
| MSTRG. 31157.1 | noncoding | -0.131072  | 15   | 93   | 551   |
| MSTRG. 31157.2 | noncoding | -0.131072  | 0    | 69   | 511   |
| MSTRG. 31158.2 | coding    | 0.134      | 621  | 1152 | 1365  |
| MSTRG. 31158.3 | coding    | 0.13       | 381  | 1206 | 1417  |
| MSTRG. 31158.4 | coding    | 0.134      | 498  | 1029 | 1241  |
| MSTRG. 31159.1 | noncoding | -0.032768  | 555  | 651  | 2010  |
| MSTRG. 31160.2 | coding    | 0.148      | 0    | 1224 | 1791  |
| MSTRG. 31160.3 | coding    | 0.17       | 1737 | 2475 | 3042  |
| MSTRG. 31160.4 | coding    | 0.176      | 210  | 963  | 1532  |
| MSTRG. 31161.1 | noncoding | -0.0180224 | 0    | 204  | 809   |
| MSTRG. 31165.1 | coding    | 0.389      | 0    | 264  | 2229  |
| MSTRG. 31165.3 | coding    | 0.414      | 0    | 219  | 1617  |

|                 |           |             |       |       |       |
|-----------------|-----------|-------------|-------|-------|-------|
| MSTRG. 31155. 1 | noncoding | -0. 0090112 | 39    | 141   | 694   |
| MSTRG. 31155. 2 | noncoding | -0. 0090112 | 30    | 132   | 463   |
| MSTRG. 31156. 1 | coding    | 0. 202      | 783   | 1962  | 3312  |
| MSTRG. 31167. 1 | coding    | 0. 455      | 222   | 789   | 3582  |
| MSTRG. 31167. 2 | coding    | 0. 477      | 222   | 723   | 967   |
| MSTRG. 31169. 5 | coding    | 0. 255      | 69    | 2130  | 3576  |
| MSTRG. 31169. 6 | coding    | 0. 27       | 117   | 2067  | 3511  |
| MSTRG. 31169. 7 | coding    | 0. 255      | 276   | 2343  | 11861 |
| MSTRG. 31171. 1 | coding    | 0. 364      | 0     | 1848  | 3298  |
| MSTRG. 31172. 3 | coding    | 0. 239      | 141   | 1950  | 2174  |
| MSTRG. 31175. 2 | coding    | 0. 245      | 63    | 2967  | 7781  |
| MSTRG. 31175. 3 | coding    | 0. 281      | 96    | 1671  | 4682  |
| MSTRG. 31174. 1 | coding    | 0. 051      | 0     | 273   | 706   |
| MSTRG. 31187. 3 | coding    | 0. 113      | 774   | 2403  | 3103  |
| MSTRG. 31188. 4 | coding    | 0. 114      | 0     | 4779  | 5217  |
| MSTRG. 31189. 2 | coding    | 0. 35       | 732   | 1452  | 2708  |
| MSTRG. 31189. 3 | coding    | 0. 327      | 300   | 1794  | 3021  |
| MSTRG. 31189. 4 | coding    | 0. 362      | 102   | 1248  | 2474  |
| MSTRG. 31193. 1 | noncoding | -0. 0004096 | 189   | 306   | 551   |
| MSTRG. 31194. 1 | noncoding | -0. 0315392 | 4671  | 4818  | 8619  |
| MSTRG. 31196. 2 | noncoding | -0. 0004096 | 1824  | 1929  | 4254  |
| MSTRG. 31196. 1 | noncoding | -0. 0004096 | 615   | 654   | 4525  |
| MSTRG. 31197. 1 | noncoding | -0. 004096  | 1449  | 1596  | 2253  |
| MSTRG. 31201. 1 | noncoding | -0. 12288   | 609   | 684   | 1046  |
| MSTRG. 31202. 1 | noncoding | -0. 0073728 | 885   | 1125  | 1281  |
| MSTRG. 31205. 1 | noncoding | -0. 004096  | 141   | 168   | 1415  |
| MSTRG. 31210. 1 | noncoding | -0. 028672  | 636   | 744   | 1699  |
| MSTRG. 31211. 1 | coding    | 0. 267      | 180   | 1776  | 6287  |
| MSTRG. 31215. 1 | coding    | 0. 244      | 0     | 1668  | 5328  |
| MSTRG. 31215. 2 | coding    | 0. 219      | 0     | 1932  | 5119  |
| MSTRG. 31218. 2 | coding    | 0. 382      | 0     | 522   | 1156  |
| MSTRG. 31219. 2 | noncoding | -0. 0544768 | 0     | 870   | 1201  |
| MSTRG. 31222. 3 | noncoding | -0. 1437696 | 0     | 291   | 1270  |
| MSTRG. 31223. 1 | noncoding | -0. 0200704 | 2343  | 2778  | 3164  |
| MSTRG. 31231. 2 | noncoding | -0. 0393216 | 3015  | 3276  | 3843  |
| MSTRG. 31231. 3 | coding    | 0. 24       | 174   | 447   | 655   |
| MSTRG. 31231. 4 | coding    | 0. 277      | 252   | 615   | 823   |
| MSTRG. 31231. 5 | noncoding | -0. 0823296 | 0     | 231   | 384   |
| MSTRG. 31231. 6 | noncoding | -0. 077824  | 0     | 231   | 5954  |
| MSTRG. 31233. 1 | noncoding | -0. 0512    | 5319  | 5853  | 8154  |
| MSTRG. 31235. 1 | noncoding | -0. 0663552 | 3564  | 3867  | 4167  |
| MSTRG. 31236. 1 | noncoding | -0. 0073728 | 8490  | 8625  | 9182  |
| MSTRG. 31237. 1 | noncoding | -0. 0360448 | 24384 | 24723 | 35985 |
| MSTRG. 31238. 1 | noncoding | -0. 0544768 | 1305  | 1539  | 9300  |
| MSTRG. 31231. 7 | noncoding | -0. 03072   | 6018  | 7677  | 8261  |
| MSTRG. 31239. 1 | noncoding | -0. 0299008 | 16026 | 16197 | 17044 |
| MSTRG. 31240. 1 | noncoding | -0. 0413696 | 9600  | 10077 | 12417 |
| MSTRG. 31241. 1 | coding    | 0. 131      | 459   | 825   | 2050  |
| MSTRG. 31242. 1 | noncoding | -0. 0495616 | 1056  | 1734  | 5405  |
| MSTRG. 31240. 2 | noncoding | -0. 0413696 | 6186  | 6663  | 9035  |
| MSTRG. 31244. 1 | noncoding | -0. 0638976 | 5694  | 6330  | 7092  |
| MSTRG. 31244. 2 | noncoding | -0. 0638976 | 2748  | 3384  | 4217  |
| MSTRG. 31245. 2 | noncoding | -0. 0176128 | 1287  | 1455  | 1608  |
| MSTRG. 31230. 1 | noncoding | -0. 0692224 | 0     | 57    | 212   |

|                 |           |            |      |      |       |
|-----------------|-----------|------------|------|------|-------|
| MSTRG. 31246.1  | noncoding | -0.0270336 | 195  | 348  | 503   |
| MSTRG. 31246.2  | noncoding | -0.0319488 | 219  | 447  | 657   |
| MSTRG. 31247.2  | noncoding | -0.0872448 | 6    | 333  | 744   |
| MSTRG. 31251.1  | coding    | 0.291      | 639  | 1716 | 4542  |
| MSTRG. 31251.3  | coding    | 0.123      | 144  | 579  | 1007  |
| MSTRG. 31251.2  | coding    | 0.229      | 144  | 1038 | 1353  |
| MSTRG. 31251.4  | coding    | 0.296      | 0    | 1044 | 4079  |
| MSTRG. 31251.5  | coding    | 0.108      | 0    | 315  | 657   |
| MSTRG. 31271.1  | coding    | 0.163      | 138  | 354  | 1105  |
| MSTRG. 31271.2  | noncoding | -0.02048   | 105  | 177  | 1808  |
| MSTRG. 31263.1  | noncoding | -0.0290816 | 72   | 276  | 1641  |
| MSTRG. 31273.1  | noncoding | -0.004096  | 3963 | 4074 | 4249  |
| MSTRG. 31278.3  | coding    | 0.225      | 285  | 687  | 1376  |
| MSTRG. 31278.4  | coding    | 0.222      | 186  | 603  | 1326  |
| MSTRG. 31278.5  | coding    | 0.115      | 204  | 1125 | 4193  |
| MSTRG. 31279.1  | noncoding | -0.147456  | 1947 | 1974 | 2147  |
| MSTRG. 31286.4  | noncoding | -0.1130496 | 0    | 63   | 475   |
| MSTRG. 31287.3  | coding    | 0.274      | 303  | 4701 | 13717 |
| MSTRG. 31285.1  | noncoding | -0.057344  | 105  | 429  | 2974  |
| MSTRG. 31289.1  | noncoding | -0.0479232 | 6183 | 6387 | 12891 |
| MSTRG. 31291.1  | noncoding | -0.0544768 | 1272 | 1548 | 4125  |
| MSTRG. 31301.1  | noncoding | -0.0528384 | 2376 | 2697 | 5283  |
| MSTRG. 31301.2  | noncoding | -0.135168  | 0    | 147  | 807   |
| MSTRG. 31301.3  | noncoding | -0.0528384 | 5313 | 5634 | 7351  |
| MSTRG. 31301.4  | noncoding | -0.0528384 | 3171 | 3492 | 5211  |
| MSTRG. 31301.5  | noncoding | -0.0528384 | 3180 | 3501 | 5218  |
| MSTRG. 31301.6  | noncoding | -0.0454656 | 2121 | 2337 | 3614  |
| MSTRG. 31301.7  | noncoding | -0.0454656 | 1683 | 1899 | 2431  |
| MSTRG. 31307.1  | noncoding | -0.004096  | 45   | 159  | 857   |
| MSTRG. 31316.2  | coding    | 0.423      | 0    | 1644 | 2461  |
| MSTRG. 31317.1  | noncoding | -0.032768  | 225  | 279  | 702   |
| MSTRG. 31320.1  | noncoding | -0.032768  | 1935 | 2301 | 3865  |
| MSTRG. 31320.3  | noncoding | -0.0237568 | 1368 | 2106 | 3977  |
| MSTRG. 31320.2  | noncoding | -0.0237568 | 2502 | 3240 | 5039  |
| MSTRG. 31320.7  | noncoding | -0.0249856 | 1851 | 2196 | 2950  |
| MSTRG. 31320.4  | noncoding | -0.0237568 | 1365 | 2103 | 4589  |
| MSTRG. 31320.5  | noncoding | -0.0237568 | 1365 | 2103 | 4202  |
| MSTRG. 31320.6  | noncoding | -0.0237568 | 1365 | 2103 | 4349  |
| MSTRG. 31320.8  | noncoding | -0.0237568 | 594  | 1332 | 2928  |
| MSTRG. 31320.9  | noncoding | -0.0237568 | 1368 | 2106 | 3683  |
| MSTRG. 31320.10 | noncoding | -0.0237568 | 2502 | 3240 | 6217  |
| MSTRG. 31320.11 | noncoding | -0.0339968 | 1974 | 2952 | 4238  |
| MSTRG. 31320.12 | noncoding | -0.0339968 | 5682 | 6660 | 7971  |
| MSTRG. 31304.1  | noncoding | -0.0004096 | 0    | 0    | 205   |
| MSTRG. 31324.2  | coding    | 0.126      | 0    | 756  | 1348  |
| MSTRG. 31333.2  | coding    | 0.132      | 165  | 1587 | 2341  |
| MSTRG. 31336.3  | coding    | 0.483      | 0    | 1218 | 2751  |
| MSTRG. 31337.1  | noncoding | -0.0045056 | 2457 | 2622 | 3423  |
| MSTRG. 31341.1  | noncoding | -0.0077824 | 624  | 690  | 844   |
| MSTRG. 31347.1  | coding    | 0.165      | 117  | 3261 | 3735  |
| MSTRG. 31348.1  | noncoding | -0.0139264 | 330  | 414  | 766   |
| MSTRG. 31350.2  | coding    | 0.347      | 6819 | 7392 | 16916 |
| MSTRG. 31351.3  | coding    | 0.534      | 0    | 1293 | 2866  |
| MSTRG. 31363.1  | noncoding | -0.0004096 | 153  | 156  | 386   |



|                  |           |             |       |       |       |
|------------------|-----------|-------------|-------|-------|-------|
| MSTRG. 31364. 5  | noncoding | -0. 016384  | 3159  | 3291  | 10781 |
| MSTRG. 31364. 6  | noncoding | -0. 008192  | 138   | 249   | 4661  |
| MSTRG. 31365. 1  | coding    | 0. 076      | 282   | 639   | 1464  |
| MSTRG. 31367. 2  | coding    | 0. 163      | 0     | 1668  | 2250  |
| MSTRG. 31371. 1  | noncoding | -0. 0663552 | 186   | 231   | 1450  |
| MSTRG. 31372. 2  | coding    | 0. 319      | 0     | 4194  | 5821  |
| MSTRG. 31374. 1  | noncoding | -0. 028672  | 0     | 117   | 544   |
| MSTRG. 31375. 1  | noncoding | -0. 053248  | 2763  | 2988  | 3496  |
| MSTRG. 31376. 1  | coding    | 0. 155      | 3705  | 3972  | 4754  |
| MSTRG. 31378. 4  | coding    | 0. 155      | 0     | 1320  | 1968  |
| MSTRG. 31379. 1  | noncoding | -0. 0004096 | 0     | 0     | 1292  |
| MSTRG. 31380. 2  | coding    | 0. 209      | 87    | 1014  | 6085  |
| MSTRG. 31380. 5  | coding    | 0. 209      | 159   | 1086  | 6196  |
| MSTRG. 31381. 1  | coding    | 0. 152      | 75    | 6471  | 7578  |
| MSTRG. 31383. 1  | noncoding | -0. 053248  | 33    | 147   | 1177  |
| MSTRG. 31384. 2  | coding    | 0. 287      | 2364  | 5253  | 10302 |
| MSTRG. 31385. 1  | coding    | 0. 051      | 249   | 447   | 1172  |
| MSTRG. 31386. 1  | noncoding | -0. 1323008 | 0     | 501   | 654   |
| MSTRG. 31390. 1  | noncoding | -0. 0004096 | 0     | 0     | 363   |
| MSTRG. 31401. 2  | coding    | 0. 306      | 492   | 2196  | 2869  |
| MSTRG. 31401. 1  | coding    | 0. 306      | 735   | 2439  | 3116  |
| MSTRG. 31401. 3  | coding    | 0. 306      | 591   | 2295  | 2901  |
| MSTRG. 31407. 1  | noncoding | -0. 0987136 | 6006  | 6303  | 11417 |
| MSTRG. 31408. 1  | noncoding | -0. 106496  | 1407  | 1458  | 2210  |
| MSTRG. 31407. 2  | noncoding | -0. 0401408 | 246   | 444   | 1650  |
| MSTRG. 31419. 1  | noncoding | -0. 0442368 | 7614  | 7857  | 25674 |
| MSTRG. 31421. 1  | noncoding | -0. 0110592 | 3036  | 3240  | 4160  |
| MSTRG. 31426. 1  | coding    | 0. 415      | 99    | 1407  | 3176  |
| MSTRG. 31426. 2  | coding    | 0. 466      | 447   | 1587  | 3357  |
| MSTRG. 31431. 1  | noncoding | -0. 022528  | 999   | 1155  | 1338  |
| MSTRG. 31435. 6  | coding    | 0. 264      | 609   | 1761  | 2526  |
| MSTRG. 31435. 10 | coding    | 0. 264      | 1719  | 2871  | 3634  |
| MSTRG. 31435. 2  | coding    | 0. 264      | 549   | 1701  | 2466  |
| MSTRG. 31435. 8  | coding    | 0. 264      | 345   | 1497  | 2261  |
| MSTRG. 31436. 1  | noncoding | -0. 1081344 | 1191  | 1209  | 1726  |
| MSTRG. 31440. 1  | noncoding | -0. 1306624 | 0     | 42    | 235   |
| MSTRG. 31459. 1  | coding    | 0. 186      | 0     | 1074  | 1307  |
| MSTRG. 31474. 1  | coding    | 0. 166      | 36    | 5475  | 7080  |
| MSTRG. 31474. 2  | coding    | 0. 215      | 8862  | 9717  | 11042 |
| MSTRG. 31476. 1  | noncoding | -0. 0831488 | 0     | 3     | 401   |
| MSTRG. 31477. 1  | noncoding | -0. 012288  | 25653 | 25791 | 37340 |
| MSTRG. 31474. 3  | noncoding | -0. 0241664 | 1203  | 1443  | 2725  |
| MSTRG. 31478. 1  | noncoding | -0. 0483328 | 1734  | 2121  | 6027  |
| MSTRG. 31477. 2  | noncoding | -0. 0004096 | 4701  | 4788  | 5456  |
| MSTRG. 31479. 1  | noncoding | -0. 024576  | 3939  | 4209  | 6711  |
| MSTRG. 31474. 4  | noncoding | -0. 06144   | 3774  | 3870  | 5362  |
| MSTRG. 31474. 6  | noncoding | -0. 0098304 | 60    | 81    | 688   |
| MSTRG. 31474. 7  | noncoding | -0. 008192  | 3255  | 3348  | 9005  |
| MSTRG. 31480. 1  | noncoding | -0. 02048   | 162   | 363   | 799   |
| MSTRG. 31468. 2  | coding    | 0. 251      | 243   | 2235  | 3828  |
| MSTRG. 31468. 4  | coding    | 0. 191      | 117   | 369   | 2331  |
| MSTRG. 31468. 5  | coding    | 0. 191      | 171   | 423   | 1398  |
| MSTRG. 31484. 1  | coding    | 0. 26       | 225   | 3402  | 7529  |
| MSTRG. 31485. 1  | noncoding | -0. 0565248 | 7956  | 8124  | 12014 |

|                  |           |             |       |       |       |
|------------------|-----------|-------------|-------|-------|-------|
| MSTRG. 31485. 2  | noncoding | -0. 0565248 | 7944  | 8112  | 10950 |
| MSTRG. 31493. 1  | coding    | 0. 09       | 0     | 840   | 5450  |
| MSTRG. 31493. 2  | coding    | 0. 09       | 0     | 840   | 4665  |
| MSTRG. 31505. 1  | noncoding | -0. 02048   | 5097  | 5190  | 5498  |
| MSTRG. 31506. 1  | coding    | 0. 022      | 7773  | 8352  | 21630 |
| MSTRG. 31505. 2  | noncoding | -0. 0004096 | 14541 | 14685 | 28971 |
| MSTRG. 31505. 4  | noncoding | -0. 0016384 | 6570  | 6702  | 12678 |
| MSTRG. 31505. 3  | noncoding | -0. 131072  | 7962  | 8040  | 11352 |
| MSTRG. 31507. 1  | coding    | 0. 074      | 855   | 1410  | 17334 |
| MSTRG. 31505. 5  | noncoding | -0. 0012288 | 2091  | 2223  | 7750  |
| MSTRG. 31495. 1  | noncoding | -0. 0004096 | 1284  | 1368  | 2104  |
| MSTRG. 31511. 1  | noncoding | -0. 032768  | 3783  | 3882  | 5144  |
| MSTRG. 31511. 2  | noncoding | -0. 032768  | 2508  | 2607  | 3877  |
| MSTRG. 31512. 1  | coding    | 0. 141      | 12594 | 12933 | 20274 |
| MSTRG. 31510. 4  | coding    | 0. 065      | 1707  | 2109  | 2624  |
| MSTRG. 31510. 5  | coding    | 0. 115      | 4755  | 4953  | 8312  |
| MSTRG. 31510. 7  | coding    | 0. 115      | 4530  | 4728  | 6805  |
| MSTRG. 31510. 8  | noncoding | -0. 0004096 | 2034  | 2247  | 12477 |
| MSTRG. 31510. 9  | noncoding | -0. 0876544 | 0     | 186   | 1432  |
| MSTRG. 31513. 1  | noncoding | -0. 002048  | 1557  | 1785  | 8926  |
| MSTRG. 31515. 1  | noncoding | -0. 04096   | 1185  | 1272  | 4175  |
| MSTRG. 31517. 1  | noncoding | -0. 0004096 | 0     | 0     | 302   |
| MSTRG. 31522. 1  | noncoding | -0. 0004096 | 6     | 129   | 299   |
| MSTRG. 31525. 1  | coding    | 0. 208      | 87    | 687   | 1192  |
| MSTRG. 31525. 2  | coding    | 0. 223      | 243   | 1734  | 2238  |
| MSTRG. 31526. 1  | noncoding | -0. 016384  | 75    | 78    | 232   |
| MSTRG. 31527. 1  | noncoding | -0. 04096   | 243   | 345   | 695   |
| MSTRG. 31531. 1  | coding    | 0. 037      | 2064  | 2199  | 2577  |
| MSTRG. 31531. 2  | coding    | 0. 037      | 1902  | 2037  | 3701  |
| MSTRG. 31532. 2  | coding    | 0. 481      | 0     | 423   | 5068  |
| MSTRG. 31531. 4  | coding    | 0. 04       | 1887  | 3249  | 4124  |
| MSTRG. 31533. 1  | noncoding | -0. 0004096 | 0     | 0     | 2073  |
| MSTRG. 31531. 8  | noncoding | -0. 028672  | 3081  | 3243  | 3433  |
| MSTRG. 31536. 1  | noncoding | -0. 034816  | 21    | 432   | 1075  |
| MSTRG. 31537. 13 | coding    | 0. 106      | 699   | 1014  | 1396  |
| MSTRG. 31543. 1  | coding    | 0. 128      | 3285  | 4839  | 10308 |
| MSTRG. 31544. 3  | noncoding | -0. 0659456 | 582   | 945   | 1102  |
| MSTRG. 31546. 5  | coding    | 0. 148      | 1677  | 3168  | 3606  |
| MSTRG. 31546. 7  | coding    | 0. 16       | 1506  | 3636  | 4047  |
| MSTRG. 31548. 1  | coding    | 0. 061      | 36216 | 37248 | 53509 |
| MSTRG. 31548. 2  | coding    | 0. 061      | 36270 | 37302 | 53475 |
| MSTRG. 31548. 3  | coding    | 0. 061      | 36087 | 37119 | 53284 |
| MSTRG. 31548. 4  | coding    | 0. 069      | 36165 | 37239 | 44015 |
| MSTRG. 31548. 5  | coding    | 0. 061      | 36084 | 37116 | 50303 |
| MSTRG. 31549. 3  | noncoding | -0. 012288  | 12    | 126   | 866   |
| MSTRG. 31551. 3  | coding    | 0. 313      | 0     | 768   | 3490  |
| MSTRG. 31551. 2  | coding    | 0. 308      | 0     | 774   | 2315  |
| MSTRG. 31552. 1  | noncoding | -0. 0065536 | 474   | 621   | 1663  |
| MSTRG. 31551. 4  | coding    | 0. 18       | 4086  | 4932  | 5609  |
| MSTRG. 31559. 1  | coding    | 0. 096      | 27    | 903   | 3015  |
| MSTRG. 31559. 3  | coding    | 0. 095      | 75    | 669   | 2781  |
| MSTRG. 31559. 4  | coding    | 0. 083      | 378   | 873   | 2983  |
| MSTRG. 31559. 5  | coding    | 0. 064      | 0     | 825   | 2937  |
| MSTRG. 31559. 6  | coding    | 0. 07       | 63    | 591   | 2703  |

|                  |           |             |       |       |       |
|------------------|-----------|-------------|-------|-------|-------|
| MSTRG. 31563. 1  | coding    | 0. 429      | 111   | 1770  | 2568  |
| MSTRG. 31564. 2  | coding    | 0. 435      | 744   | 3420  | 4298  |
| MSTRG. 31565. 1  | noncoding | -0. 0004096 | 0     | 0     | 256   |
| MSTRG. 31566. 2  | coding    | 0. 313      | 414   | 924   | 1911  |
| MSTRG. 31570. 4  | coding    | 0. 501      | 0     | 1143  | 1521  |
| MSTRG. 31570. 5  | coding    | 0. 358      | 0     | 3420  | 3798  |
| MSTRG. 31570. 3  | coding    | 0. 413      | 519   | 2268  | 5368  |
| MSTRG. 31570. 6  | coding    | 0. 355      | 0     | 3444  | 3796  |
| MSTRG. 31570. 9  | coding    | 0. 439      | 4533  | 5646  | 5883  |
| MSTRG. 31570. 8  | coding    | 0. 438      | 708   | 1542  | 1779  |
| MSTRG. 31570. 7  | coding    | 0. 413      | 0     | 1749  | 5106  |
| MSTRG. 31571. 2  | noncoding | -0. 0741376 | 1434  | 1902  | 2057  |
| MSTRG. 31571. 1  | noncoding | -0. 0741376 | 7125  | 7593  | 7747  |
| MSTRG. 31571. 3  | noncoding | -0. 0761856 | 7677  | 8103  | 8259  |
| MSTRG. 31571. 4  | noncoding | -0. 077824  | 6018  | 6429  | 6586  |
| MSTRG. 31567. 2  | coding    | 0. 517      | 57    | 648   | 2170  |
| MSTRG. 31576. 1  | noncoding | -0. 004096  | 48    | 60    | 215   |
| MSTRG. 31581. 4  | coding    | 0. 297      | 954   | 1869  | 4247  |
| MSTRG. 31586. 5  | noncoding | -0. 0602112 | 42    | 225   | 520   |
| MSTRG. 31584. 2  | coding    | 0. 357      | 690   | 1464  | 4338  |
| MSTRG. 31591. 1  | noncoding | -0. 02048   | 582   | 666   | 840   |
| MSTRG. 31598. 1  | coding    | 0. 465      | 669   | 2139  | 3943  |
| MSTRG. 31598. 2  | coding    | 0. 465      | 51    | 1521  | 3183  |
| MSTRG. 31598. 3  | coding    | 0. 465      | 51    | 1521  | 3181  |
| MSTRG. 31598. 5  | coding    | 0. 465      | 300   | 1770  | 3437  |
| MSTRG. 31598. 4  | coding    | 0. 465      | 459   | 1929  | 3595  |
| MSTRG. 31599. 3  | coding    | 0. 204      | 117   | 1110  | 1951  |
| MSTRG. 31599. 4  | coding    | 0. 204      | 117   | 1110  | 2342  |
| MSTRG. 31597. 1  | coding    | 0. 401      | 0     | 786   | 1645  |
| MSTRG. 31597. 2  | coding    | 0. 444      | 0     | 738   | 1635  |
| MSTRG. 31603. 2  | coding    | 0. 444      | 0     | 1044  | 3012  |
| MSTRG. 31603. 3  | coding    | 0. 45       | 0     | 1059  | 2522  |
| MSTRG. 31603. 4  | coding    | 0. 451      | 0     | 1062  | 1391  |
| MSTRG. 31603. 8  | coding    | 0. 44       | 0     | 1107  | 1615  |
| MSTRG. 31603. 11 | coding    | 0. 357      | 138   | 1215  | 2042  |
| MSTRG. 31602. 2  | coding    | 0. 065      | 48    | 675   | 4568  |
| MSTRG. 31606. 1  | coding    | 0. 136      | 894   | 1644  | 3663  |
| MSTRG. 31606. 2  | coding    | 0. 136      | 5169  | 5919  | 7939  |
| MSTRG. 31606. 3  | noncoding | -0. 1024    | 1314  | 1386  | 1836  |
| MSTRG. 31606. 4  | noncoding | -0. 086016  | 1545  | 1596  | 3722  |
| MSTRG. 31607. 1  | noncoding | -0. 049152  | 618   | 681   | 2774  |
| MSTRG. 31606. 6  | noncoding | -0. 0217088 | 17979 | 18192 | 26971 |
| MSTRG. 31606. 7  | coding    | 0. 128      | 5088  | 6165  | 7016  |
| MSTRG. 31606. 8  | noncoding | -0. 0622592 | 14223 | 14589 | 14742 |
| MSTRG. 31608. 1  | noncoding | -0. 147456  | 2370  | 2433  | 6100  |
| MSTRG. 31606. 10 | coding    | 0. 136      | 2208  | 2958  | 4978  |
| MSTRG. 31606. 11 | coding    | 0. 136      | 2697  | 3447  | 5466  |
| MSTRG. 31617. 1  | coding    | 0. 133      | 222   | 2133  | 2302  |
| MSTRG. 31618. 1  | coding    | 0. 075      | 42    | 1494  | 2249  |
| MSTRG. 31618. 4  | noncoding | -0. 0577536 | 1200  | 1533  | 2021  |
| MSTRG. 31618. 5  | noncoding | -0. 0425984 | 1233  | 1758  | 2246  |
| MSTRG. 31619. 1  | coding    | 0. 294      | 1116  | 1782  | 7157  |
| MSTRG. 31620. 1  | noncoding | -0. 0344064 | 804   | 1215  | 1369  |
| MSTRG. 31622. 2  | coding    | 0. 174      | 0     | 2376  | 3569  |

|                 |           |             |      |      |       |
|-----------------|-----------|-------------|------|------|-------|
| MSTRG. 31623. 4 | coding    | 0. 114      | 426  | 1692 | 5716  |
| MSTRG. 31625. 1 | noncoding | -0. 077824  | 198  | 219  | 381   |
| MSTRG. 31626. 3 | coding    | 0. 129      | 1245 | 5709 | 6867  |
| MSTRG. 31626. 4 | coding    | 0. 129      | 1713 | 6177 | 7283  |
| MSTRG. 31626. 5 | coding    | 0. 129      | 1323 | 5787 | 6892  |
| MSTRG. 31627. 1 | noncoding | -0. 0217088 | 261  | 351  | 505   |
| MSTRG. 31613. 2 | coding    | 0. 146      | 87   | 6012 | 6503  |
| MSTRG. 31613. 3 | coding    | 0. 265      | 753  | 3978 | 5153  |
| MSTRG. 31614. 1 | noncoding | -0. 1077248 | 369  | 1260 | 9850  |
| MSTRG. 31630. 5 | coding    | 0. 323      | 0    | 5208 | 5363  |
| MSTRG. 31630. 6 | coding    | 0. 321      | 0    | 4164 | 4332  |
| MSTRG. 31633. 1 | noncoding | -0. 008192  | 3    | 99   | 1278  |
| MSTRG. 31633. 2 | noncoding | -0. 008192  | 3    | 99   | 1265  |
| MSTRG. 31629. 1 | coding    | 0. 185      | 42   | 780  | 1773  |
| MSTRG. 31636. 5 | coding    | 0. 119      | 6    | 1140 | 2920  |
| MSTRG. 31637. 2 | coding    | 0. 175      | 0    | 237  | 1421  |
| MSTRG. 31637. 3 | coding    | 0. 181      | 0    | 219  | 1583  |
| MSTRG. 31638. 1 | noncoding | -0. 02048   | 804  | 927  | 2185  |
| MSTRG. 31640. 1 | noncoding | -0. 049152  | 2367 | 2445 | 3762  |
| MSTRG. 31641. 1 | noncoding | -0. 180224  | 2334 | 2415 | 3551  |
| MSTRG. 31642. 1 | coding    | 0. 048      | 2529 | 2724 | 3287  |
| MSTRG. 31643. 1 | noncoding | -0. 0176128 | 153  | 315  | 4945  |
| MSTRG. 31637. 6 | coding    | 0. 106      | 423  | 774  | 1595  |
| MSTRG. 31644. 2 | coding    | 0. 156      | 609  | 1074 | 2448  |
| MSTRG. 31644. 5 | coding    | 0. 188      | 495  | 6006 | 7352  |
| MSTRG. 31648. 1 | noncoding | -0. 0114688 | 1620 | 1758 | 2052  |
| MSTRG. 31648. 2 | noncoding | -0. 0704512 | 855  | 1059 | 2226  |
| MSTRG. 31648. 3 | coding    | 0. 076      | 429  | 1092 | 4818  |
| MSTRG. 31648. 5 | coding    | 0. 049      | 0    | 1014 | 5945  |
| MSTRG. 31650. 1 | noncoding | -0. 0892928 | 57   | 63   | 263   |
| MSTRG. 31651. 2 | coding    | 0. 168      | 0    | 996  | 1616  |
| MSTRG. 31661. 1 | noncoding | -0. 008192  | 1983 | 2181 | 6610  |
| MSTRG. 31662. 1 | noncoding | -0. 049152  | 1053 | 1158 | 1653  |
| MSTRG. 31672. 2 | coding    | 0. 309      | 0    | 555  | 716   |
| MSTRG. 31672. 3 | coding    | 0. 356      | 549  | 2028 | 2188  |
| MSTRG. 31673. 1 | noncoding | -0. 0086016 | 750  | 870  | 1277  |
| MSTRG. 31678. 2 | noncoding | -0. 0413696 | 3531 | 4146 | 29448 |
| MSTRG. 31678. 1 | noncoding | -0. 0311296 | 4323 | 5247 | 41745 |
| MSTRG. 31679. 2 | coding    | 0. 515      | 0    | 5466 | 7207  |
| MSTRG. 31682. 1 | noncoding | -0. 008192  | 54   | 204  | 1206  |
| MSTRG. 31690. 1 | noncoding | -0. 0192512 | 999  | 1149 | 1591  |
| MSTRG. 31691. 1 | coding    | 0. 345      | 804  | 4308 | 7759  |
| MSTRG. 31691. 2 | coding    | 0. 347      | 558  | 4044 | 7433  |
| MSTRG. 31692. 1 | noncoding | -0. 0270336 | 63   | 219  | 654   |
| MSTRG. 31691. 3 | coding    | 0. 327      | 81   | 3255 | 6788  |
| MSTRG. 31700. 1 | coding    | 0. 137      | 1563 | 1878 | 2644  |
| MSTRG. 31703. 2 | noncoding | -0. 0495616 | 1869 | 2301 | 2538  |
| MSTRG. 31694. 1 | coding    | 0. 178      | 0    | 363  | 536   |
| MSTRG. 31721. 4 | coding    | 0. 163      | 1983 | 2358 | 2651  |
| MSTRG. 31722. 2 | coding    | 0. 088      | 120  | 450  | 864   |
| MSTRG. 31723. 5 | coding    | 0. 288      | 180  | 681  | 1329  |
| MSTRG. 31723. 6 | coding    | 0. 3        | 0    | 648  | 1210  |
| MSTRG. 31725. 2 | coding    | 0. 384      | 87   | 882  | 2501  |
| MSTRG. 31725. 3 | coding    | 0. 422      | 321  | 1071 | 2662  |

|                  |           |             |      |      |      |
|------------------|-----------|-------------|------|------|------|
| MSTRG. 31725. 4  | coding    | 0. 275      | 192  | 585  | 2205 |
| MSTRG. 31729. 1  | noncoding | -0. 196608  | 72   | 138  | 490  |
| MSTRG. 31742. 2  | coding    | 0. 054      | 177  | 1074 | 2488 |
| MSTRG. 31740. 1  | coding    | 0. 438      | 0    | 2151 | 3866 |
| MSTRG. 31743. 1  | coding    | 0. 302      | 180  | 948  | 1566 |
| MSTRG. 31743. 2  | coding    | 0. 326      | 0    | 831  | 1450 |
| MSTRG. 31743. 3  | coding    | 0. 257      | 75   | 564  | 1179 |
| MSTRG. 31745. 3  | coding    | 0. 082      | 1665 | 2973 | 3542 |
| MSTRG. 31745. 6  | coding    | 0. 066      | 684  | 1878 | 2446 |
| MSTRG. 31745. 7  | coding    | 0. 077      | 1326 | 1725 | 2294 |
| MSTRG. 31746. 1  | noncoding | -0. 024576  | 1005 | 1101 | 3944 |
| MSTRG. 31747. 1  | noncoding | -0. 0032768 | 201  | 345  | 958  |
| MSTRG. 31745. 10 | noncoding | -0. 098304  | 570  | 636  | 3650 |
| MSTRG. 31748. 1  | noncoding | -0. 0086016 | 96   | 255  | 671  |
| MSTRG. 31748. 2  | noncoding | -0. 1024    | 15   | 36   | 242  |
| MSTRG. 31748. 3  | noncoding | -0. 0086016 | 93   | 252  | 535  |
| MSTRG. 31749. 1  | noncoding | -0. 03072   | 69   | 261  | 446  |
| MSTRG. 31750. 1  | noncoding | -0. 0028672 | 0    | 63   | 231  |
| MSTRG. 31753. 1  | coding    | 0. 391      | 33   | 597  | 1056 |
| MSTRG. 31757. 4  | coding    | 0. 114      | 660  | 4065 | 4738 |
| MSTRG. 31757. 5  | coding    | 0. 114      | 396  | 3819 | 4493 |
| MSTRG. 31758. 1  | coding    | 0. 337      | 438  | 2532 | 5088 |
| MSTRG. 31766. 1  | noncoding | -0. 0294912 | 7008 | 7176 | 9708 |
| MSTRG. 31777. 1  | noncoding | -0. 0004096 | 0    | 0    | 320  |
| MSTRG. 31763. 1  | noncoding | -0. 0069632 | 378  | 672  | 1063 |
| MSTRG. 31786. 3  | noncoding | -0. 008192  | 1023 | 1161 | 1317 |
| MSTRG. 31786. 2  | coding    | 0. 233      | 0    | 2862 | 3548 |
| MSTRG. 31787. 1  | noncoding | -0. 196608  | 96   | 111  | 267  |
| MSTRG. 31786. 4  | noncoding | -0. 3497984 | 1197 | 1968 | 2542 |
| MSTRG. 31786. 7  | noncoding | -0. 3497984 | 1173 | 1944 | 2516 |
| MSTRG. 31786. 10 | noncoding | -0. 0516096 | 549  | 873  | 1026 |
| MSTRG. 31786. 11 | noncoding | -0. 3837952 | 1146 | 1935 | 2458 |
| MSTRG. 31786. 12 | noncoding | -0. 3743744 | 1191 | 1881 | 2405 |
| MSTRG. 31796. 5  | coding    | 0. 07       | 507  | 1290 | 1592 |
| MSTRG. 31796. 4  | coding    | 0. 078      | 507  | 1419 | 5954 |
| MSTRG. 31796. 6  | coding    | 0. 083      | 0    | 1146 | 5680 |
| MSTRG. 31797. 1  | noncoding | -0. 049152  | 1365 | 1473 | 7478 |
| MSTRG. 31799. 1  | coding    | 0. 318      | 402  | 2745 | 3203 |
| MSTRG. 31801. 1  | noncoding | -0. 0565248 | 1149 | 1833 | 2323 |
| MSTRG. 31801. 2  | noncoding | -0. 083968  | 540  | 759  | 1477 |
| MSTRG. 31801. 3  | noncoding | -0. 0999424 | 417  | 681  | 1230 |
| MSTRG. 31801. 4  | noncoding | -0. 0622592 | 579  | 849  | 1333 |
| MSTRG. 31801. 5  | noncoding | -0. 0729088 | 462  | 918  | 1404 |
| MSTRG. 31801. 6  | noncoding | -0. 0643072 | 243  | 570  | 1059 |
| MSTRG. 31801. 7  | noncoding | -0. 032768  | 207  | 348  | 832  |
| MSTRG. 31801. 8  | noncoding | -0. 0372736 | 1284 | 1872 | 2362 |
| MSTRG. 31789. 1  | coding    | 0. 359      | 444  | 1056 | 1212 |
| MSTRG. 31789. 2  | coding    | 0. 334      | 450  | 1155 | 1549 |
| MSTRG. 31790. 1  | coding    | 0. 31       | 138  | 1278 | 1772 |
| MSTRG. 31792. 2  | coding    | 0. 26       | 0    | 1056 | 2397 |
| MSTRG. 31792. 3  | coding    | 0. 241      | 21   | 879  | 1034 |
| MSTRG. 31793. 1  | noncoding | -0. 0004096 | 0    | 0    | 569  |
| MSTRG. 31793. 2  | noncoding | -0. 0004096 | 0    | 0    | 415  |
| MSTRG. 31792. 4  | coding    | 0. 343      | 0    | 621  | 1539 |

|                  |           |             |      |      |      |
|------------------|-----------|-------------|------|------|------|
| MSTRG. 31803. 1  | coding    | 0. 237      | 0    | 4353 | 6831 |
| MSTRG. 31803. 3  | coding    | 0. 144      | 117  | 1107 | 3313 |
| MSTRG. 31804. 1  | noncoding | -0. 0319488 | 498  | 654  | 1186 |
| MSTRG. 31805. 5  | noncoding | -0. 2781184 | 0    | 21   | 471  |
| MSTRG. 31805. 3  | coding    | 0. 077      | 372  | 522  | 902  |
| MSTRG. 31805. 1  | coding    | 0. 077      | 192  | 342  | 1557 |
| MSTRG. 31805. 4  | coding    | 0. 077      | 192  | 342  | 1019 |
| MSTRG. 31806. 1  | coding    | 0. 409      | 18   | 462  | 1182 |
| MSTRG. 31810. 1  | noncoding | -0. 458752  | 606  | 618  | 953  |
| MSTRG. 31812. 5  | coding    | 0. 157      | 708  | 2451 | 4139 |
| MSTRG. 31812. 9  | coding    | 0. 157      | 609  | 2352 | 2619 |
| MSTRG. 31812. 8  | coding    | 0. 157      | 561  | 2304 | 2571 |
| MSTRG. 31813. 1  | noncoding | -0. 114688  | 27   | 36   | 702  |
| MSTRG. 31812. 12 | coding    | 0. 111      | 264  | 618  | 803  |
| MSTRG. 31812. 10 | coding    | 0. 107      | 297  | 600  | 785  |
| MSTRG. 31815. 4  | coding    | 0. 234      | 615  | 3891 | 4227 |
| MSTRG. 31815. 2  | coding    | 0. 235      | 615  | 3894 | 5231 |
| MSTRG. 31815. 3  | coding    | 0. 235      | 615  | 3891 | 5228 |
| MSTRG. 31815. 5  | coding    | 0. 187      | 1839 | 3198 | 3516 |
| MSTRG. 31818. 2  | coding    | 0. 107      | 147  | 1311 | 2212 |
| MSTRG. 31818. 3  | coding    | 0. 075      | 147  | 825  | 2637 |
| MSTRG. 31818. 7  | coding    | 0. 1        | 363  | 894  | 3243 |
| MSTRG. 31820. 2  | coding    | 0. 324      | 630  | 1221 | 4880 |
| MSTRG. 31820. 3  | coding    | 0. 302      | 192  | 744  | 4176 |
| MSTRG. 31820. 4  | coding    | 0. 324      | 192  | 783  | 4443 |
| MSTRG. 31820. 5  | coding    | 0. 302      | 438  | 990  | 4422 |
| MSTRG. 31820. 6  | coding    | 0. 324      | 216  | 807  | 4466 |
| MSTRG. 31820. 7  | coding    | 0. 302      | 216  | 768  | 4199 |
| MSTRG. 31820. 8  | coding    | 0. 324      | 228  | 819  | 4478 |
| MSTRG. 31820. 9  | coding    | 0. 33       | 2130 | 2478 | 5911 |
| MSTRG. 31822. 2  | coding    | 0. 534      | 1020 | 2127 | 2709 |
| MSTRG. 31824. 1  | noncoding | -0. 0512    | 591  | 849  | 5058 |
| MSTRG. 31826. 1  | noncoding | -0. 1191936 | 0    | 102  | 2974 |
| MSTRG. 31829. 1  | noncoding | -0. 0086016 | 192  | 345  | 545  |
| MSTRG. 31833. 4  | coding    | 0. 03       | 150  | 567  | 1145 |
| MSTRG. 31838. 1  | noncoding | -0. 0475136 | 624  | 897  | 1435 |
| MSTRG. 31839. 2  | coding    | 0. 388      | 249  | 1692 | 2222 |
| MSTRG. 31865. 1  | noncoding | -0. 0167936 | 774  | 927  | 1259 |
| MSTRG. 31867. 3  | coding    | 0. 144      | 285  | 1236 | 7656 |
| MSTRG. 31867. 5  | coding    | 0. 115      | 99   | 969  | 7142 |
| MSTRG. 31867. 7  | coding    | 0. 114      | 99   | 876  | 7049 |
| MSTRG. 31867. 6  | coding    | 0. 113      | 303  | 1278 | 7450 |
| MSTRG. 31868. 1  | noncoding | -0. 014336  | 1368 | 1437 | 2718 |
| MSTRG. 31867. 8  | noncoding | -0. 008192  | 309  | 408  | 1486 |
| MSTRG. 31859. 4  | coding    | 0. 051      | 30   | 1653 | 1903 |
| MSTRG. 31859. 3  | coding    | 0. 058      | 42   | 1677 | 1929 |
| MSTRG. 31861. 2  | coding    | 0. 154      | 1008 | 1230 | 4529 |
| MSTRG. 31875. 1  | noncoding | -0. 0352256 | 0    | 201  | 1111 |
| MSTRG. 31883. 1  | noncoding | -0. 028672  | 0    | 30   | 334  |
| MSTRG. 31885. 3  | coding    | 0. 142      | 0    | 450  | 6688 |
| MSTRG. 31885. 4  | coding    | 0. 01       | 2118 | 2232 | 4256 |
| MSTRG. 31886. 1  | noncoding | -0. 0077824 | 768  | 915  | 2839 |
| MSTRG. 31886. 2  | noncoding | -0. 0077824 | 2397 | 2544 | 4458 |
| MSTRG. 31897. 1  | coding    | 0. 101      | 261  | 669  | 4101 |

|                  |           |             |      |      |       |
|------------------|-----------|-------------|------|------|-------|
| MSTRG. 31898. 1  | coding    | 0. 083      | 165  | 372  | 3949  |
| MSTRG. 31897. 2  | noncoding | -0. 090112  | 1470 | 1533 | 2914  |
| MSTRG. 31904. 1  | noncoding | -0. 02048   | 573  | 651  | 857   |
| MSTRG. 31907. 1  | noncoding | -0. 0028672 | 408  | 522  | 1504  |
| MSTRG. 31905. 1  | noncoding | -0. 077824  | 105  | 147  | 592   |
| MSTRG. 31909. 1  | noncoding | -0. 0401408 | 0    | 261  | 509   |
| MSTRG. 31910. 1  | coding    | 0. 456      | 0    | 1071 | 1537  |
| MSTRG. 31911. 2  | coding    | 0. 429      | 0    | 345  | 1110  |
| MSTRG. 31914. 2  | noncoding | -0. 0319488 | 141  | 306  | 2075  |
| MSTRG. 31914. 3  | noncoding | -0. 0380928 | 3693 | 3858 | 4257  |
| MSTRG. 31917. 7  | coding    | 0. 306      | 0    | 261  | 414   |
| MSTRG. 31919. 1  | coding    | 0. 092      | 0    | 555  | 4578  |
| MSTRG. 31920. 6  | coding    | 0. 17       | 237  | 1347 | 1630  |
| MSTRG. 31920. 8  | coding    | 0. 183      | 327  | 1263 | 1524  |
| MSTRG. 31920. 9  | coding    | 0. 183      | 330  | 1266 | 1526  |
| MSTRG. 31923. 1  | noncoding | -0. 0827392 | 306  | 540  | 1306  |
| MSTRG. 31923. 2  | noncoding | -0. 0712704 | 213  | 432  | 980   |
| MSTRG. 31994. 3  | noncoding | -0. 034816  | 3    | 273  | 850   |
| MSTRG. 31998. 2  | noncoding | -0. 14336   | 783  | 843  | 997   |
| MSTRG. 31999. 1  | coding    | 0. 059      | 1557 | 1986 | 2383  |
| MSTRG. 32003. 1  | noncoding | -0. 0057344 | 3294 | 3534 | 5934  |
| MSTRG. 32003. 2  | noncoding | -0. 0057344 | 3234 | 3474 | 5318  |
| MSTRG. 32016. 1  | noncoding | -0. 028672  | 426  | 441  | 1108  |
| MSTRG. 32029. 1  | noncoding | -0. 079872  | 717  | 762  | 2315  |
| MSTRG. 32030. 1  | noncoding | -0. 0708608 | 1575 | 1635 | 1866  |
| MSTRG. 32051. 1  | noncoding | -0. 090112  | 327  | 354  | 980   |
| MSTRG. 32052. 1  | coding    | 0. 253      | 51   | 1110 | 5840  |
| MSTRG. 32052. 2  | coding    | 0. 25       | 51   | 1152 | 5892  |
| MSTRG. 31935. 1  | coding    | 0. 171      | 0    | 2988 | 11278 |
| MSTRG. 31935. 2  | coding    | 0. 208      | 0    | 2403 | 3125  |
| MSTRG. 31935. 6  | coding    | 0. 208      | 0    | 2403 | 5716  |
| MSTRG. 31935. 8  | noncoding | -0. 1552384 | 0    | 924  | 2962  |
| MSTRG. 31935. 9  | noncoding | -0. 1552384 | 0    | 924  | 5204  |
| MSTRG. 31935. 10 | noncoding | -0. 155648  | 0    | 954  | 1732  |
| MSTRG. 31936. 3  | noncoding | -0. 077824  | 102  | 183  | 1709  |
| MSTRG. 31939. 1  | noncoding | -0. 0966656 | 0    | 561  | 1143  |
| MSTRG. 31939. 2  | noncoding | -0. 1056768 | 0    | 474  | 1056  |
| MSTRG. 31939. 3  | noncoding | -0. 090112  | 54   | 468  | 805   |
| MSTRG. 31939. 4  | noncoding | -0. 0782336 | 252  | 600  | 756   |
| MSTRG. 31940. 1  | noncoding | -0. 0192512 | 831  | 951  | 4532  |
| MSTRG. 31941. 1  | noncoding | -0. 004096  | 12   | 153  | 1852  |
| MSTRG. 31941. 2  | noncoding | -0. 0016384 | 2598 | 2742 | 9404  |
| MSTRG. 31941. 3  | noncoding | -0. 0016384 | 5910 | 6054 | 13539 |
| MSTRG. 31941. 4  | noncoding | -0. 0016384 | 5577 | 5721 | 12765 |
| MSTRG. 31942. 4  | noncoding | -0. 0495616 | 2568 | 2691 | 5086  |
| MSTRG. 31928. 2  | coding    | 0. 02       | 660  | 1572 | 3573  |
| MSTRG. 31930. 1  | coding    | 0. 284      | 0    | 84   | 286   |
| MSTRG. 31930. 2  | coding    | 0. 108      | 2256 | 3273 | 4716  |
| MSTRG. 31948. 1  | noncoding | -0. 0004096 | 1767 | 1848 | 2219  |
| MSTRG. 31963. 1  | noncoding | -0. 057344  | 9    | 102  | 341   |
| MSTRG. 31968. 1  | noncoding | -0. 0028672 | 834  | 909  | 3981  |
| MSTRG. 31981. 1  | coding    | 0. 094      | 2640 | 3084 | 4861  |
| MSTRG. 31990. 1  | noncoding | -0. 053248  | 3540 | 3585 | 5008  |
| MSTRG. 31992. 2  | coding    | 0. 481      | 480  | 8631 | 13441 |

|                 |           |             |       |       |       |
|-----------------|-----------|-------------|-------|-------|-------|
| MSTRG. 32053. 1 | coding    | 0. 09       | 81    | 1572  | 2150  |
| MSTRG. 32054. 1 | coding    | 0. 104      | 57    | 285   | 775   |
| MSTRG. 32056. 2 | noncoding | -0. 0159744 | 16341 | 16581 | 29923 |
| MSTRG. 32056. 3 | coding    | 0. 393      | 7308  | 9240  | 9465  |
| MSTRG. 32058. 1 | noncoding | -0. 0135168 | 690   | 834   | 8750  |
| MSTRG. 32059. 1 | coding    | 0. 607      | 0     | 1194  | 2393  |
| MSTRG. 32068. 2 | coding    | 0. 051      | 552   | 897   | 2468  |
| MSTRG. 32055. 2 | noncoding | -0. 0053248 | 84    | 231   | 734   |
| MSTRG. 32069. 2 | noncoding | -0. 028672  | 1518  | 1794  | 2740  |
| MSTRG. 32070. 3 | coding    | 0. 1        | 198   | 414   | 574   |
| MSTRG. 32072. 3 | noncoding | -0. 036864  | 1554  | 1683  | 7498  |
| MSTRG. 32076. 5 | coding    | 0. 021      | 1044  | 2337  | 2791  |
| MSTRG. 32076. 7 | noncoding | -0. 055296  | 1347  | 1623  | 2075  |
| MSTRG. 32076. 3 | coding    | 0. 031      | 1044  | 2361  | 3083  |
| MSTRG. 32076. 4 | coding    | 0. 064      | 1071  | 1893  | 2614  |
| MSTRG. 32076. 6 | coding    | 0. 064      | 1383  | 2205  | 2926  |
| MSTRG. 32077. 1 | noncoding | -0. 0004096 | 0     | 0     | 224   |
| MSTRG. 32078. 1 | coding    | 0. 066      | 918   | 1803  | 2361  |
| MSTRG. 32084. 1 | noncoding | -0. 0155648 | 258   | 270   | 820   |
| MSTRG. 32085. 1 | noncoding | -0. 0004096 | 0     | 0     | 665   |
| MSTRG. 32086. 1 | noncoding | -0. 0393216 | 594   | 834   | 2267  |
| MSTRG. 32091. 1 | noncoding | -0. 04096   | 336   | 546   | 2587  |
| MSTRG. 32091. 2 | coding    | 0. 06       | 141   | 369   | 1495  |
| MSTRG. 32104. 3 | coding    | 0. 087      | 585   | 1080  | 1445  |
| MSTRG. 32105. 1 | noncoding | -0. 016384  | 279   | 405   | 1530  |
| MSTRG. 32106. 1 | noncoding | -0. 0004096 | 0     | 0     | 680   |
| MSTRG. 32107. 1 | noncoding | -0. 036864  | 198   | 210   | 1395  |
| MSTRG. 32108. 2 | noncoding | -0. 0004096 | 1017  | 1017  | 1284  |
| MSTRG. 32108. 1 | noncoding | -0. 065536  | 978   | 1041  | 2596  |
| MSTRG. 32109. 1 | noncoding | -0. 0004096 | 0     | 0     | 838   |
| MSTRG. 32110. 1 | noncoding | -0. 057344  | 984   | 1116  | 4702  |
| MSTRG. 32104. 4 | noncoding | -0. 0237568 | 5793  | 6063  | 6219  |
| MSTRG. 32111. 1 | coding    | 0. 045      | 4137  | 4572  | 6273  |
| MSTRG. 32112. 1 | noncoding | -0. 0249856 | 2634  | 2763  | 6911  |
| MSTRG. 32094. 1 | noncoding | -0. 0004096 | 0     | 0     | 262   |
| MSTRG. 32094. 2 | noncoding | -0. 0004096 | 0     | 0     | 238   |
| MSTRG. 32113. 1 | noncoding | -0. 045056  | 348   | 423   | 580   |
| MSTRG. 32114. 2 | noncoding | -0. 0221184 | 150   | 300   | 457   |
| MSTRG. 32115. 1 | noncoding | -0. 0274432 | 432   | 672   | 826   |
| MSTRG. 32116. 2 | noncoding | -0. 1060864 | 0     | 111   | 3504  |
| MSTRG. 32119. 1 | noncoding | -0. 0561152 | 0     | 45    | 813   |
| MSTRG. 32123. 1 | noncoding | -0. 0253952 | 0     | 42    | 241   |
| MSTRG. 32128. 1 | coding    | 0. 051      | 105   | 237   | 1514  |
| MSTRG. 32129. 1 | noncoding | -0. 016384  | 300   | 474   | 628   |
| MSTRG. 32130. 2 | noncoding | -0. 0139264 | 849   | 1002  | 1175  |
| MSTRG. 32130. 1 | noncoding | -0. 045056  | 2253  | 2481  | 2654  |
| MSTRG. 32130. 3 | noncoding | -0. 047104  | 2643  | 2856  | 3013  |
| MSTRG. 32133. 1 | coding    | 0. 106      | 324   | 462   | 4554  |
| MSTRG. 32134. 1 | coding    | 0. 059      | 138   | 1335  | 7103  |
| MSTRG. 32134. 2 | coding    | 0. 106      | 42    | 1353  | 6702  |
| MSTRG. 32134. 4 | noncoding | -0. 0405504 | 1017  | 1176  | 11932 |
| MSTRG. 32137. 1 | coding    | 0. 4        | 990   | 7479  | 10908 |
| MSTRG. 32137. 2 | coding    | 0. 4        | 282   | 6771  | 9717  |
| MSTRG. 32137. 3 | coding    | 0. 4        | 21    | 6483  | 9486  |



|                 |           |             |      |      |       |
|-----------------|-----------|-------------|------|------|-------|
| MSTRG. 32136. 1 | noncoding | -0. 0016384 | 279  | 423  | 687   |
| MSTRG. 32140. 1 | noncoding | -0. 024576  | 447  | 561  | 716   |
| MSTRG. 32141. 1 | coding    | 0. 164      | 231  | 2649 | 3215  |
| MSTRG. 32142. 1 | noncoding | -0. 022528  | 384  | 696  | 853   |
| MSTRG. 32143. 4 | coding    | 0. 092      | 603  | 816  | 2087  |
| MSTRG. 32146. 1 | coding    | 0. 424      | 228  | 1899 | 3008  |
| MSTRG. 32154. 2 | coding    | 0. 372      | 0    | 432  | 1714  |
| MSTRG. 32155. 1 | coding    | 0. 174      | 114  | 1971 | 2691  |
| MSTRG. 32155. 2 | coding    | 0. 173      | 21   | 1893 | 4135  |
| MSTRG. 32158. 3 | coding    | 0. 173      | 201  | 723  | 879   |
| MSTRG. 32163. 1 | noncoding | -0. 012288  | 330  | 396  | 666   |
| MSTRG. 32164. 1 | coding    | 0. 109      | 267  | 1209 | 1972  |
| MSTRG. 32150. 2 | coding    | 0. 073      | 615  | 1626 | 2140  |
| MSTRG. 32150. 3 | coding    | 0. 108      | 0    | 1506 | 2007  |
| MSTRG. 32167. 2 | noncoding | -0. 0208896 | 1227 | 1380 | 1632  |
| MSTRG. 32167. 3 | noncoding | -0. 0167936 | 813  | 981  | 2232  |
| MSTRG. 32168. 1 | noncoding | -0. 0004096 | 0    | 0    | 399   |
| MSTRG. 32169. 2 | coding    | 0. 02       | 342  | 543  | 1112  |
| MSTRG. 32166. 1 | noncoding | -0. 0262144 | 807  | 993  | 2347  |
| MSTRG. 32172. 2 | coding    | 0. 242      | 570  | 1194 | 1558  |
| MSTRG. 32176. 4 | coding    | 0. 231      | 0    | 1425 | 1985  |
| MSTRG. 32176. 3 | coding    | 0. 215      | 237  | 1299 | 1859  |
| MSTRG. 32177. 1 | coding    | 0. 178      | 87   | 444  | 719   |
| MSTRG. 32180. 1 | coding    | 0. 199      | 27   | 1311 | 1706  |
| MSTRG. 32181. 4 | coding    | 0. 415      | 285  | 1911 | 3009  |
| MSTRG. 32183. 6 | noncoding | -0. 0356352 | 1260 | 1470 | 1912  |
| MSTRG. 32184. 1 | noncoding | -0. 0188416 | 759  | 912  | 1254  |
| MSTRG. 32184. 3 | coding    | 0. 25       | 21   | 396  | 1589  |
| MSTRG. 32199. 1 | noncoding | -0. 0741376 | 8028 | 8442 | 8596  |
| MSTRG. 32199. 2 | noncoding | -0. 063488  | 666  | 1152 | 1318  |
| MSTRG. 32199. 3 | noncoding | -0. 0282624 | 1314 | 1503 | 2646  |
| MSTRG. 32201. 1 | noncoding | -0. 0319488 | 126  | 294  | 561   |
| MSTRG. 32203. 2 | coding    | 0. 317      | 0    | 1341 | 1766  |
| MSTRG. 32203. 4 | coding    | 0. 285      | 99   | 1428 | 1853  |
| MSTRG. 32206. 2 | coding    | 0. 249      | 147  | 1077 | 2023  |
| MSTRG. 32206. 4 | coding    | 0. 252      | 537  | 1545 | 2493  |
| MSTRG. 32206. 5 | coding    | 0. 256      | 255  | 1185 | 2133  |
| MSTRG. 32208. 2 | coding    | 0. 288      | 81   | 1395 | 1770  |
| MSTRG. 32204. 2 | noncoding | -0. 0393216 | 1968 | 3168 | 3322  |
| MSTRG. 32212. 1 | noncoding | -0. 004096  | 234  | 369  | 2178  |
| MSTRG. 32225. 1 | noncoding | -0. 0012288 | 0    | 117  | 329   |
| MSTRG. 32227. 1 | noncoding | -0. 036864  | 138  | 258  | 424   |
| MSTRG. 32229. 2 | coding    | 0. 379      | 273  | 732  | 2132  |
| MSTRG. 32232. 1 | coding    | 0. 282      | 0    | 6306 | 10115 |
| MSTRG. 32232. 2 | coding    | 0. 272      | 990  | 7155 | 8545  |
| MSTRG. 32231. 1 | noncoding | -0. 0151552 | 9    | 15   | 213   |
| MSTRG. 32231. 2 | noncoding | -0. 0151552 | 6    | 12   | 220   |
| MSTRG. 32237. 2 | coding    | 0. 113      | 0    | 423  | 717   |
| MSTRG. 32238. 1 | noncoding | -0. 0126976 | 147  | 297  | 681   |
| MSTRG. 32239. 1 | coding    | 0. 303      | 9    | 468  | 673   |
| MSTRG. 32241. 1 | noncoding | -0. 053248  | 282  | 342  | 602   |
| MSTRG. 32242. 1 | noncoding | -0. 0274432 | 18   | 144  | 1014  |
| MSTRG. 32246. 2 | coding    | 0. 331      | 1275 | 3081 | 7015  |
| MSTRG. 32246. 3 | coding    | 0. 376      | 156  | 3198 | 4497  |

|                  |           |             |      |       |       |
|------------------|-----------|-------------|------|-------|-------|
| MSTRG. 32249. 1  | coding    | 0. 095      | 0    | 1812  | 4582  |
| MSTRG. 32249. 5  | coding    | 0. 136      | 174  | 1887  | 5419  |
| MSTRG. 32250. 1  | noncoding | -0. 08192   | 1605 | 1614  | 2562  |
| MSTRG. 32251. 1  | noncoding | -0. 004096  | 336  | 420   | 1012  |
| MSTRG. 32251. 2  | coding    | 0. 104      | 8163 | 8385  | 11842 |
| MSTRG. 32252. 1  | noncoding | -0. 008192  | 303  | 426   | 724   |
| MSTRG. 32254. 1  | coding    | 0. 303      | 0    | 3501  | 6197  |
| MSTRG. 32257. 1  | noncoding | -0. 1572864 | 0    | 348   | 552   |
| MSTRG. 32260. 2  | coding    | 0. 304      | 162  | 1032  | 2248  |
| MSTRG. 32265. 1  | coding    | 0. 263      | 42   | 627   | 838   |
| MSTRG. 32266. 1  | coding    | 0. 194      | 18   | 399   | 704   |
| MSTRG. 32267. 1  | coding    | 0. 145      | 54   | 435   | 745   |
| MSTRG. 32270. 2  | coding    | 0. 142      | 624  | 930   | 1306  |
| MSTRG. 32275. 3  | coding    | 0. 258      | 234  | 948   | 2397  |
| MSTRG. 32275. 1  | coding    | 0. 258      | 180  | 894   | 2344  |
| MSTRG. 32275. 2  | coding    | 0. 258      | 405  | 1119  | 2568  |
| MSTRG. 32275. 6  | coding    | 0. 258      | 168  | 882   | 2299  |
| MSTRG. 32275. 7  | coding    | 0. 258      | 390  | 1104  | 2454  |
| MSTRG. 32276. 4  | coding    | 0. 204      | 1605 | 2133  | 2953  |
| MSTRG. 32278. 3  | coding    | 0. 333      | 0    | 1455  | 1694  |
| MSTRG. 32278. 4  | coding    | 0. 334      | 0    | 1458  | 1667  |
| MSTRG. 32277. 1  | coding    | 0. 591      | 0    | 1068  | 2677  |
| MSTRG. 32283. 1  | noncoding | -0. 0528384 | 96   | 663   | 937   |
| MSTRG. 32283. 2  | noncoding | -0. 0528384 | 96   | 663   | 1138  |
| MSTRG. 32285. 1  | noncoding | -0. 04096   | 306  | 408   | 1457  |
| MSTRG. 32286. 1  | noncoding | -0. 0704512 | 333  | 1209  | 1376  |
| MSTRG. 32289. 1  | coding    | 0. 447      | 3    | 1932  | 2087  |
| MSTRG. 32291. 2  | noncoding | -0. 0618496 | 177  | 387   | 603   |
| MSTRG. 32292. 1  | coding    | 0. 583      | 108  | 1227  | 2032  |
| MSTRG. 32292. 3  | coding    | 0. 578      | 243  | 1335  | 2138  |
| MSTRG. 32293. 1  | coding    | 0. 313      | 0    | 1224  | 3601  |
| MSTRG. 32300. 3  | coding    | 0. 439      | 675  | 1986  | 2810  |
| MSTRG. 32300. 5  | coding    | 0. 441      | 672  | 2007  | 2821  |
| MSTRG. 32301. 3  | coding    | 0. 31       | 264  | 1962  | 2426  |
| MSTRG. 32305. 2  | coding    | 0. 259      | 186  | 1194  | 2344  |
| MSTRG. 32324. 12 | coding    | 0. 319      | 0    | 10200 | 11089 |
| MSTRG. 32324. 17 | coding    | 0. 309      | 0    | 10425 | 11314 |
| MSTRG. 32324. 18 | coding    | 0. 336      | 0    | 10866 | 11755 |
| MSTRG. 32324. 20 | coding    | 0. 332      | 0    | 9960  | 10849 |
| MSTRG. 32324. 21 | coding    | 0. 32       | 0    | 11154 | 12043 |
| MSTRG. 32324. 3  | coding    | 0. 285      | 0    | 6525  | 7414  |
| MSTRG. 32324. 33 | coding    | 0. 314      | 0    | 10164 | 11053 |
| MSTRG. 32324. 35 | coding    | 0. 319      | 0    | 9051  | 9940  |
| MSTRG. 32324. 38 | coding    | 0. 326      | 0    | 9960  | 10849 |
| MSTRG. 32324. 40 | coding    | 0. 32       | 0    | 9069  | 9958  |
| MSTRG. 32324. 43 | coding    | 0. 321      | 0    | 10950 | 11839 |
| MSTRG. 32324. 47 | coding    | 0. 329      | 0    | 12183 | 13072 |
| MSTRG. 32324. 49 | coding    | 0. 327      | 0    | 10992 | 11881 |
| MSTRG. 32324. 50 | coding    | 0. 327      | 0    | 11700 | 12589 |
| MSTRG. 32324. 53 | coding    | 0. 309      | 0    | 8424  | 9313  |
| MSTRG. 32324. 55 | coding    | 0. 324      | 0    | 10200 | 11089 |
| MSTRG. 32324. 56 | coding    | 0. 325      | 0    | 12324 | 13213 |
| MSTRG. 32324. 7  | coding    | 0. 326      | 0    | 9576  | 10465 |
| MSTRG. 32324. 9  | coding    | 0. 331      | 0    | 11958 | 12847 |

|                  |           |             |      |      |      |
|------------------|-----------|-------------|------|------|------|
| MSTRG. 32310. 3  | coding    | 0. 352      | 0    | 2712 | 3356 |
| MSTRG. 32310. 4  | coding    | 0. 343      | 0    | 2778 | 3422 |
| MSTRG. 32322. 7  | coding    | 0. 331      | 0    | 1338 | 1547 |
| MSTRG. 32322. 10 | coding    | 0. 315      | 426  | 1824 | 2033 |
| MSTRG. 32322. 12 | coding    | 0. 312      | 426  | 1833 | 2042 |
| MSTRG. 32322. 8  | coding    | 0. 348      | 951  | 2163 | 2372 |
| MSTRG. 32322. 11 | coding    | 0. 345      | 1047 | 2268 | 2477 |
| MSTRG. 32322. 3  | coding    | 0. 346      | 1047 | 2265 | 2474 |
| MSTRG. 32322. 4  | coding    | 0. 329      | 378  | 1692 | 1900 |
| MSTRG. 32322. 9  | coding    | 0. 329      | 561  | 1875 | 2082 |
| MSTRG. 32322. 2  | coding    | 0. 329      | 795  | 2109 | 2317 |
| MSTRG. 32322. 16 | coding    | 0. 329      | 447  | 1761 | 1968 |
| MSTRG. 32323. 1  | noncoding | -0. 0667648 | 888  | 1128 | 1604 |
| MSTRG. 32320. 3  | coding    | 0. 256      | 42   | 789  | 2022 |
| MSTRG. 32331. 1  | coding    | 0. 251      | 30   | 1530 | 5244 |
| MSTRG. 32331. 3  | coding    | 0. 258      | 51   | 1575 | 5017 |
| MSTRG. 32331. 4  | coding    | 0. 254      | 48   | 1563 | 4976 |
| MSTRG. 32331. 5  | coding    | 0. 251      | 0    | 1500 | 1897 |
| MSTRG. 32331. 6  | coding    | 0. 252      | 117  | 1623 | 2018 |
| MSTRG. 32334. 1  | coding    | 0. 322      | 2247 | 4851 | 5183 |
| MSTRG. 32334. 2  | coding    | 0. 39       | 2205 | 4083 | 5180 |
| MSTRG. 32334. 3  | coding    | 0. 323      | 507  | 3111 | 3443 |
| MSTRG. 32338. 1  | noncoding | -0. 0561152 | 105  | 171  | 375  |
| MSTRG. 32339. 2  | noncoding | -0. 0339968 | 687  | 861  | 1502 |
| MSTRG. 32339. 1  | noncoding | -0. 0364544 | 2658 | 3309 | 4349 |
| MSTRG. 32339. 3  | noncoding | -0. 018432  | 1359 | 1566 | 2200 |
| MSTRG. 32338. 4  | coding    | 0. 253      | 360  | 1494 | 1657 |
| MSTRG. 32338. 6  | coding    | 0. 235      | 318  | 1485 | 1649 |
| MSTRG. 32338. 7  | coding    | 0. 249      | 258  | 1395 | 1559 |
| MSTRG. 32329. 1  | coding    | 0. 314      | 426  | 1053 | 5111 |
| MSTRG. 32329. 2  | coding    | 0. 316      | 720  | 1095 | 5117 |
| MSTRG. 32329. 3  | coding    | 0. 322      | 921  | 1344 | 4409 |
| MSTRG. 32329. 5  | coding    | 0. 316      | 900  | 1275 | 1962 |
| MSTRG. 32329. 6  | coding    | 0. 259      | 1755 | 2217 | 2904 |
| MSTRG. 32329. 7  | coding    | 0. 251      | 426  | 1143 | 1828 |
| MSTRG. 32340. 2  | coding    | 0. 196      | 288  | 1344 | 6662 |
| MSTRG. 32340. 4  | coding    | 0. 236      | 276  | 903  | 2113 |
| MSTRG. 32342. 1  | coding    | 0. 242      | 75   | 813  | 3909 |
| MSTRG. 32343. 2  | coding    | 0. 707      | 0    | 216  | 517  |
| MSTRG. 32344. 1  | noncoding | -0. 1048576 | 0    | 744  | 898  |
| MSTRG. 32350. 3  | coding    | 0. 376      | 0    | 2430 | 2585 |
| MSTRG. 32354. 2  | coding    | 0. 348      | 0    | 1551 | 1813 |
| MSTRG. 32354. 3  | coding    | 0. 567      | 0    | 681  | 1612 |
| MSTRG. 32356. 1  | coding    | 0. 682      | 984  | 3117 | 3827 |
| MSTRG. 32358. 2  | coding    | 0. 496      | 384  | 2022 | 2483 |
| MSTRG. 32358. 3  | coding    | 0. 505      | 93   | 1773 | 2236 |
| MSTRG. 32358. 4  | coding    | 0. 527      | 555  | 1638 | 2099 |
| MSTRG. 32364. 3  | coding    | 0. 184      | 0    | 1215 | 1549 |
| MSTRG. 32365. 1  | noncoding | -0. 0483328 | 1743 | 2382 | 2629 |
| MSTRG. 32365. 2  | noncoding | -0. 057344  | 1149 | 1689 | 3229 |
| MSTRG. 32366. 5  | noncoding | -0. 0331776 | 63   | 282  | 542  |
| MSTRG. 32369. 4  | noncoding | -0. 0892928 | 165  | 462  | 976  |
| MSTRG. 32369. 3  | noncoding | -0. 09216   | 462  | 936  | 1451 |
| MSTRG. 32371. 2  | coding    | 0. 398      | 1326 | 2676 | 3005 |

|                  |           |             |      |      |      |
|------------------|-----------|-------------|------|------|------|
| MSTRG. 32371. 3  | coding    | 0. 402      | 429  | 1659 | 1989 |
| MSTRG. 32359. 2  | coding    | 0. 262      | 24   | 876  | 1030 |
| MSTRG. 32372. 1  | noncoding | -0. 26624   | 117  | 1536 | 2302 |
| MSTRG. 32377. 1  | coding    | 0. 253      | 0    | 441  | 2374 |
| MSTRG. 32381. 7  | coding    | 0. 532      | 0    | 1485 | 1831 |
| MSTRG. 32381. 11 | coding    | 0. 548      | 141  | 4704 | 5051 |
| MSTRG. 32381. 10 | coding    | 0. 563      | 0    | 3990 | 4338 |
| MSTRG. 32381. 2  | coding    | 0. 546      | 0    | 4575 | 4921 |
| MSTRG. 32381. 3  | coding    | 0. 503      | 0    | 4830 | 5176 |
| MSTRG. 32381. 1  | coding    | 0. 504      | 0    | 4818 | 5164 |
| MSTRG. 32381. 8  | coding    | 0. 545      | 0    | 4617 | 4963 |
| MSTRG. 32381. 12 | coding    | 0. 553      | 225  | 4758 | 5106 |
| MSTRG. 32381. 4  | coding    | 0. 584      | 0    | 5202 | 5548 |
| MSTRG. 32381. 6  | coding    | 0. 465      | 5031 | 8190 | 8537 |
| MSTRG. 32381. 14 | noncoding | -0. 0364544 | 3264 | 3579 | 5763 |
| MSTRG. 32378. 1  | noncoding | -0. 024576  | 516  | 702  | 1216 |
| MSTRG. 32384. 10 | coding    | 0. 225      | 39   | 1896 | 2822 |
| MSTRG. 32384. 11 | coding    | 0. 238      | 0    | 2040 | 2967 |
| MSTRG. 32384. 5  | coding    | 0. 235      | 0    | 2049 | 2972 |
| MSTRG. 32388. 1  | coding    | 0. 638      | 684  | 1953 | 3387 |
| MSTRG. 32395. 5  | coding    | 0. 326      | 0    | 1062 | 1341 |
| MSTRG. 32395. 2  | coding    | 0. 296      | 228  | 1410 | 1689 |
| MSTRG. 32395. 3  | coding    | 0. 353      | 0    | 1077 | 1357 |
| MSTRG. 32395. 4  | coding    | 0. 376      | 327  | 1176 | 1457 |
| MSTRG. 32395. 7  | coding    | 0. 414      | 213  | 936  | 1216 |
| MSTRG. 32394. 2  | coding    | 0. 372      | 153  | 1089 | 1603 |
| MSTRG. 32397. 2  | coding    | 0. 253      | 333  | 1467 | 1701 |
| MSTRG. 32397. 3  | coding    | 0. 269      | 603  | 1956 | 2124 |
| MSTRG. 32397. 4  | coding    | 0. 26       | 24   | 1362 | 1516 |
| MSTRG. 32397. 5  | coding    | 0. 207      | 309  | 1155 | 3080 |
| MSTRG. 32397. 6  | coding    | 0. 278      | 0    | 891  | 2785 |
| MSTRG. 32402. 1  | coding    | 0. 37       | 60   | 1368 | 1648 |
| MSTRG. 32405. 3  | coding    | 0. 319      | 249  | 549  | 1881 |
| MSTRG. 32407. 1  | noncoding | -0. 106496  | 243  | 282  | 771  |
| MSTRG. 32411. 2  | coding    | 0. 55       | 1446 | 2271 | 6968 |
| MSTRG. 32412. 2  | coding    | 0. 42       | 0    | 1074 | 2556 |
| MSTRG. 32411. 3  | noncoding | -0. 043008  | 7041 | 7356 | 7554 |
| MSTRG. 32411. 4  | noncoding | -0. 0094208 | 7707 | 7908 | 8104 |
| MSTRG. 32411. 5  | noncoding | -0. 0155648 | 414  | 576  | 7010 |
| MSTRG. 32415. 1  | coding    | 0. 362      | 1662 | 2382 | 2999 |
| MSTRG. 32416. 3  | coding    | 0. 513      | 0    | 2757 | 3090 |
| MSTRG. 32418. 6  | coding    | 0. 488      | 0    | 5982 | 6138 |
| MSTRG. 32418. 9  | coding    | 0. 488      | 0    | 5991 | 6147 |
| MSTRG. 32419. 2  | coding    | 0. 533      | 0    | 3351 | 3511 |
| MSTRG. 32424. 1  | coding    | 0. 269      | 0    | 2091 | 3486 |
| MSTRG. 32427. 1  | noncoding | -0. 083968  | 528  | 1353 | 1508 |
| MSTRG. 32434. 2  | noncoding | -0. 0565248 | 0    | 1395 | 2124 |
| MSTRG. 32441. 1  | coding    | 0. 275      | 30   | 438  | 801  |
| MSTRG. 32441. 2  | coding    | 0. 25       | 81   | 489  | 853  |
| MSTRG. 32441. 3  | coding    | 0. 316      | 0    | 387  | 750  |
| MSTRG. 32444. 1  | noncoding | -0. 0118784 | 738  | 891  | 1267 |
| MSTRG. 32444. 2  | noncoding | -0. 1609728 | 0    | 384  | 2415 |
| MSTRG. 32456. 3  | coding    | 0. 266      | 192  | 1563 | 2022 |
| MSTRG. 32456. 2  | coding    | 0. 245      | 453  | 2013 | 2631 |

|                  |           |             |      |      |       |
|------------------|-----------|-------------|------|------|-------|
| MSTRG. 32447. 2  | coding    | 0. 397      | 9    | 735  | 889   |
| MSTRG. 32451. 2  | coding    | 0. 276      | 0    | 1995 | 2607  |
| MSTRG. 32457. 1  | noncoding | -0. 0417792 | 378  | 594  | 986   |
| MSTRG. 32484. 5  | coding    | 0. 387      | 435  | 1680 | 1851  |
| MSTRG. 32484. 6  | coding    | 0. 369      | 606  | 1767 | 1938  |
| MSTRG. 32484. 1  | coding    | 0. 373      | 0    | 2016 | 11148 |
| MSTRG. 32484. 4  | coding    | 0. 335      | 306  | 1581 | 1939  |
| MSTRG. 32484. 3  | coding    | 0. 425      | 390  | 933  | 1405  |
| MSTRG. 32484. 2  | coding    | 0. 247      | 0    | 1908 | 2273  |
| MSTRG. 32484. 7  | coding    | 0. 281      | 0    | 2025 | 10873 |
| MSTRG. 32484. 8  | coding    | 0. 324      | 5499 | 7200 | 16179 |
| MSTRG. 32484. 9  | coding    | 0. 351      | 270  | 1590 | 1948  |
| MSTRG. 32484. 11 | coding    | 0. 386      | 96   | 555  | 743   |
| MSTRG. 32489. 1  | coding    | 0. 159      | 141  | 1599 | 1821  |
| MSTRG. 32489. 2  | coding    | 0. 16       | 141  | 1602 | 1824  |
| MSTRG. 32492. 2  | coding    | 0. 444      | 0    | 3330 | 3564  |
| MSTRG. 32492. 5  | coding    | 0. 67       | 0    | 1686 | 3847  |
| MSTRG. 32494. 1  | noncoding | -0. 0155648 | 915  | 1092 | 1532  |
| MSTRG. 32468. 1  | coding    | 0. 165      | 534  | 4317 | 7867  |
| MSTRG. 32468. 4  | coding    | 0. 249      | 174  | 3837 | 6671  |
| MSTRG. 32468. 5  | coding    | 0. 25       | 3    | 3714 | 6549  |
| MSTRG. 32468. 6  | noncoding | -0. 02048   | 2826 | 2931 | 6203  |
| MSTRG. 32469. 1  | noncoding | -0. 12288   | 216  | 276  | 6990  |
| MSTRG. 32474. 2  | noncoding | -0. 0217088 | 396  | 1398 | 1553  |
| MSTRG. 32474. 3  | noncoding | -0. 043008  | 117  | 315  | 877   |
| MSTRG. 32480. 1  | coding    | 0. 399      | 0    | 756  | 991   |
| MSTRG. 32497. 2  | coding    | 0. 241      | 807  | 1500 | 1998  |
| MSTRG. 32501. 2  | coding    | 0. 372      | 1002 | 1626 | 1788  |
| MSTRG. 32501. 3  | coding    | 0. 379      | 897  | 1422 | 1576  |
| MSTRG. 32507. 4  | coding    | 0. 168      | 588  | 1659 | 2605  |
| MSTRG. 32507. 3  | coding    | 0. 168      | 603  | 1467 | 2539  |
| MSTRG. 32507. 6  | coding    | 0. 317      | 0    | 1368 | 1523  |
| MSTRG. 32509. 1  | coding    | 0. 145      | 621  | 3171 | 3923  |
| MSTRG. 32509. 3  | coding    | 0. 14       | 0    | 3087 | 3241  |
| MSTRG. 32513. 1  | noncoding | -0. 0413696 | 261  | 561  | 716   |
| MSTRG. 32513. 2  | noncoding | -0. 0630784 | 75   | 501  | 980   |
| MSTRG. 32514. 4  | coding    | 0. 216      | 420  | 3027 | 4431  |
| MSTRG. 32514. 5  | coding    | 0. 136      | 741  | 2511 | 8237  |
| MSTRG. 32515. 1  | noncoding | -0. 036864  | 2979 | 3060 | 5393  |
| MSTRG. 32519. 1  | coding    | 0. 368      | 0    | 630  | 4856  |
| MSTRG. 32519. 3  | coding    | 0. 325      | 0    | 954  | 1828  |
| MSTRG. 32519. 4  | coding    | 0. 368      | 0    | 630  | 1544  |
| MSTRG. 32519. 5  | coding    | 0. 368      | 0    | 630  | 7329  |
| MSTRG. 32519. 6  | coding    | 0. 351      | 0    | 603  | 3823  |
| MSTRG. 32519. 7  | coding    | 0. 368      | 0    | 630  | 2433  |
| MSTRG. 32519. 8  | coding    | 0. 368      | 0    | 630  | 2361  |
| MSTRG. 32519. 9  | coding    | 0. 343      | 81   | 951  | 1824  |
| MSTRG. 32520. 1  | noncoding | -0. 0319488 | 327  | 558  | 1729  |
| MSTRG. 32520. 2  | noncoding | -0. 006144  | 57   | 204  | 1081  |
| MSTRG. 32520. 3  | noncoding | -0. 006144  | 57   | 204  | 1241  |
| MSTRG. 32520. 4  | noncoding | -0. 06144   | 0    | 114  | 474   |
| MSTRG. 32520. 5  | noncoding | -0. 02048   | 57   | 162  | 566   |
| MSTRG. 32523. 3  | coding    | 0. 307      | 129  | 516  | 703   |
| MSTRG. 32528. 2  | noncoding | -0. 0380928 | 639  | 849  | 1075  |

|                  |           |             |      |      |       |
|------------------|-----------|-------------|------|------|-------|
| MSTRG. 32528. 1  | noncoding | -0. 0561152 | 177  | 342  | 568   |
| MSTRG. 32534. 11 | coding    | 0. 326      | 0    | 1086 | 4992  |
| MSTRG. 32534. 10 | coding    | 0. 328      | 0    | 1191 | 8553  |
| MSTRG. 32534. 3  | coding    | 0. 324      | 0    | 1212 | 10478 |
| MSTRG. 32534. 4  | coding    | 0. 319      | 0    | 1353 | 11119 |
| MSTRG. 32534. 6  | coding    | 0. 333      | 0    | 1164 | 9664  |
| MSTRG. 32534. 7  | coding    | 0. 319      | 0    | 1353 | 10910 |
| MSTRG. 32534. 13 | coding    | 0. 385      | 321  | 1380 | 2186  |
| MSTRG. 32534. 5  | coding    | 0. 485      | 0    | 2763 | 3026  |
| MSTRG. 32534. 12 | coding    | 0. 484      | 0    | 2751 | 3774  |
| MSTRG. 32534. 8  | coding    | 0. 484      | 0    | 2751 | 3574  |
| MSTRG. 32542. 1  | coding    | 0. 37       | 138  | 528  | 708   |
| MSTRG. 32542. 3  | coding    | 0. 36       | 342  | 846  | 1026  |
| MSTRG. 32545. 1  | noncoding | -0. 0200704 | 210  | 789  | 943   |
| MSTRG. 32546. 2  | coding    | 0. 244      | 420  | 1155 | 2637  |
| MSTRG. 32547. 4  | coding    | 0. 54       | 63   | 1581 | 2566  |
| MSTRG. 32547. 5  | coding    | 0. 525      | 0    | 1710 | 2695  |
| MSTRG. 32547. 6  | coding    | 0. 52       | 162  | 1566 | 2550  |
| MSTRG. 32549. 1  | noncoding | -0. 0630784 | 7185 | 8244 | 8615  |
| MSTRG. 32549. 2  | noncoding | -0. 0598016 | 4608 | 5175 | 5330  |
| MSTRG. 32549. 3  | noncoding | -0. 0536576 | 294  | 882  | 6192  |
| MSTRG. 32550. 1  | noncoding | -0. 0937984 | 597  | 1143 | 1313  |
| MSTRG. 32552. 1  | noncoding | -0. 002048  | 0    | 135  | 561   |
| MSTRG. 32554. 2  | noncoding | -0. 0008192 | 0    | 102  | 438   |
| MSTRG. 32554. 1  | noncoding | -0. 0413696 | 189  | 405  | 909   |
| MSTRG. 32554. 3  | noncoding | -0. 0671744 | 393  | 756  | 1212  |
| MSTRG. 32538. 2  | coding    | 0. 258      | 0    | 411  | 669   |
| MSTRG. 32538. 4  | coding    | 0. 264      | 0    | 267  | 624   |
| MSTRG. 32538. 5  | coding    | 0. 253      | 96   | 1203 | 1456  |
| MSTRG. 32541. 1  | coding    | 0. 458      | 0    | 1644 | 2916  |
| MSTRG. 32541. 4  | coding    | 0. 45       | 0    | 1650 | 2916  |
| MSTRG. 32557. 1  | noncoding | -0. 026624  | 216  | 348  | 735   |
| MSTRG. 32558. 1  | coding    | 0. 544      | 0    | 2670 | 3536  |
| MSTRG. 32558. 2  | coding    | 0. 551      | 0    | 2619 | 3483  |
| MSTRG. 32561. 2  | coding    | 0. 504      | 1353 | 3921 | 4095  |
| MSTRG. 32561. 3  | coding    | 0. 516      | 0    | 2532 | 2704  |
| MSTRG. 32561. 4  | coding    | 0. 502      | 312  | 2595 | 2962  |
| MSTRG. 32561. 5  | coding    | 0. 492      | 213  | 2493 | 3340  |
| MSTRG. 32564. 1  | noncoding | -0. 057344  | 0    | 522  | 15108 |
| MSTRG. 32564. 2  | noncoding | -0. 0581632 | 3627 | 3987 | 11888 |
| MSTRG. 32562. 1  | coding    | 0. 641      | 0    | 399  | 748   |
| MSTRG. 32566. 3  | coding    | 0. 02       | 4230 | 4494 | 4908  |
| MSTRG. 32566. 4  | noncoding | -0. 0720896 | 1659 | 1965 | 5162  |
| MSTRG. 32566. 5  | noncoding | -0. 0536576 | 2865 | 3636 | 15949 |
| MSTRG. 32568. 3  | noncoding | -0. 118784  | 732  | 1875 | 2029  |
| MSTRG. 32575. 3  | coding    | 0. 278      | 135  | 1227 | 4336  |
| MSTRG. 32575. 4  | coding    | 0. 278      | 99   | 1191 | 2786  |
| MSTRG. 32575. 5  | coding    | 0. 379      | 0    | 804  | 1185  |
| MSTRG. 32575. 6  | noncoding | -0. 0618496 | 0    | 1419 | 3012  |
| MSTRG. 32575. 8  | coding    | 0. 24       | 0    | 1155 | 2745  |
| MSTRG. 32575. 10 | coding    | 0. 409      | 0    | 528  | 2133  |
| MSTRG. 32575. 9  | coding    | 0. 409      | 0    | 528  | 3637  |
| MSTRG. 32575. 11 | coding    | 0. 378      | 21   | 531  | 1934  |
| MSTRG. 32575. 12 | coding    | 0. 378      | 21   | 531  | 2123  |

|                 |           |             |       |       |       |
|-----------------|-----------|-------------|-------|-------|-------|
| MSTRG. 32574. 3 | noncoding | -0. 1355776 | 1074  | 1536  | 1689  |
| MSTRG. 32576. 2 | coding    | 0. 328      | 0     | 1563  | 1735  |
| MSTRG. 32582. 1 | coding    | 0. 472      | 0     | 987   | 1292  |
| MSTRG. 32588. 3 | coding    | 0. 504      | 417   | 2103  | 2518  |
| MSTRG. 32592. 1 | coding    | 0. 322      | 0     | 1476  | 1631  |
| MSTRG. 32592. 3 | coding    | 0. 396      | 483   | 1566  | 1720  |
| MSTRG. 32596. 2 | coding    | 0. 534      | 0     | 1524  | 2046  |
| MSTRG. 32598. 2 | noncoding | -0. 0679936 | 342   | 1014  | 1193  |
| MSTRG. 32606. 2 | coding    | 0. 462      | 912   | 3225  | 3771  |
| MSTRG. 32606. 4 | coding    | 0. 53       | 57    | 2370  | 2526  |
| MSTRG. 32606. 3 | coding    | 0. 54       | 0     | 2352  | 2509  |
| MSTRG. 32607. 2 | coding    | 0. 228      | 1215  | 1650  | 1821  |
| MSTRG. 32607. 3 | coding    | 0. 294      | 0     | 1122  | 1292  |
| MSTRG. 32604. 3 | coding    | 0. 349      | 0     | 3282  | 4603  |
| MSTRG. 32609. 2 | coding    | 0. 36       | 870   | 3042  | 3243  |
| MSTRG. 32611. 1 | coding    | 0. 399      | 825   | 1686  | 1840  |
| MSTRG. 32613. 1 | noncoding | -0. 0004096 | 6     | 183   | 2628  |
| MSTRG. 32614. 1 | coding    | 0. 531      | 0     | 1311  | 1478  |
| MSTRG. 32614. 2 | coding    | 0. 447      | 357   | 2127  | 2295  |
| MSTRG. 32614. 3 | coding    | 0. 431      | 648   | 2247  | 2415  |
| MSTRG. 32614. 4 | coding    | 0. 447      | 648   | 2418  | 2586  |
| MSTRG. 32614. 5 | coding    | 0. 543      | 0     | 1224  | 1391  |
| MSTRG. 32614. 6 | coding    | 0. 536      | 18    | 1284  | 1452  |
| MSTRG. 32617. 1 | coding    | 0. 447      | 0     | 441   | 594   |
| MSTRG. 32619. 2 | coding    | 0. 43       | 0     | 450   | 643   |
| MSTRG. 32621. 1 | noncoding | -0. 032768  | 135   | 138   | 406   |
| MSTRG. 32628. 1 | coding    | 0. 059      | 180   | 1185  | 1617  |
| MSTRG. 32628. 2 | noncoding | -0. 008192  | 150   | 291   | 447   |
| MSTRG. 32640. 1 | coding    | 0. 271      | 0     | 2130  | 6983  |
| MSTRG. 32641. 1 | coding    | 0. 134      | 120   | 5124  | 6747  |
| MSTRG. 32641. 2 | coding    | 0. 134      | 120   | 5118  | 7398  |
| MSTRG. 32641. 3 | coding    | 0. 139      | 96    | 4950  | 7211  |
| MSTRG. 32641. 4 | coding    | 0. 132      | 5706  | 10614 | 12837 |
| MSTRG. 32634. 1 | coding    | 0. 253      | 246   | 1416  | 7520  |
| MSTRG. 32634. 2 | coding    | 0. 141      | 228   | 2763  | 5832  |
| MSTRG. 32646. 2 | noncoding | -0. 0057344 | 0     | 36    | 293   |
| MSTRG. 32646. 3 | noncoding | -0. 012288  | 0     | 54    | 325   |
| MSTRG. 32658. 1 | coding    | 0. 402      | 6     | 585   | 1495  |
| MSTRG. 32658. 2 | coding    | 0. 354      | 84    | 963   | 1575  |
| MSTRG. 32658. 4 | noncoding | -0. 1150976 | 0     | 768   | 1303  |
| MSTRG. 32658. 3 | coding    | 0. 318      | 45    | 927   | 1215  |
| MSTRG. 32660. 1 | noncoding | -0. 1765376 | 777   | 786   | 1386  |
| MSTRG. 32661. 2 | coding    | 0. 07       | 10269 | 10881 | 11167 |
| MSTRG. 32662. 1 | noncoding | -0. 086016  | 249   | 306   | 842   |
| MSTRG. 32663. 1 | coding    | 0. 342      | 126   | 1023  | 1365  |
| MSTRG. 32664. 1 | noncoding | -0. 024576  | 609   | 711   | 1687  |
| MSTRG. 32665. 1 | noncoding | -0. 02048   | 36    | 519   | 1407  |
| MSTRG. 32666. 2 | coding    | 0. 081      | 12    | 867   | 1023  |
| MSTRG. 32656. 1 | coding    | 0. 097      | 0     | 1206  | 8341  |
| MSTRG. 32656. 3 | coding    | 0. 096      | 0     | 1176  | 2543  |
| MSTRG. 32668. 5 | coding    | 0. 095      | 183   | 2844  | 5225  |
| MSTRG. 32668. 6 | coding    | 0. 095      | 132   | 2793  | 3905  |
| MSTRG. 32674. 2 | coding    | 0. 339      | 1137  | 2091  | 2852  |
| MSTRG. 32672. 1 | noncoding | -0. 06144   | 195   | 291   | 1449  |

|                  |           |             |      |      |       |
|------------------|-----------|-------------|------|------|-------|
| MSTRG. 32681. 3  | coding    | 0. 055      | 774  | 4191 | 7421  |
| MSTRG. 32683. 1  | noncoding | -0. 180224  | 2493 | 2523 | 5760  |
| MSTRG. 32682. 3  | noncoding | -0. 0004096 | 5253 | 5397 | 9485  |
| MSTRG. 32682. 4  | noncoding | -0. 0004096 | 9027 | 9171 | 13246 |
| MSTRG. 32686. 1  | coding    | 0. 094      | 177  | 3753 | 5802  |
| MSTRG. 32686. 3  | coding    | 0. 094      | 438  | 4014 | 5624  |
| MSTRG. 32687. 1  | noncoding | -0. 0004096 | 5397 | 5637 | 7373  |
| MSTRG. 32688. 1  | noncoding | -0. 024576  | 243  | 366  | 1000  |
| MSTRG. 32689. 1  | noncoding | -0. 04096   | 48   | 60   | 2697  |
| MSTRG. 32690. 1  | coding    | 0. 222      | 114  | 2127 | 3595  |
| MSTRG. 32691. 1  | coding    | 0. 386      | 72   | 600  | 1036  |
| MSTRG. 32692. 1  | coding    | 0. 131      | 0    | 330  | 518   |
| MSTRG. 32697. 1  | noncoding | -0. 0897024 | 0    | 114  | 270   |
| MSTRG. 32698. 1  | noncoding | -0. 024576  | 348  | 354  | 832   |
| MSTRG. 32699. 1  | coding    | 0. 486      | 0    | 1470 | 1853  |
| MSTRG. 32699. 2  | coding    | 0. 48       | 0    | 1455 | 1824  |
| MSTRG. 32699. 3  | coding    | 0. 482      | 0    | 1458 | 1825  |
| MSTRG. 32699. 4  | coding    | 0. 505      | 0    | 1344 | 1500  |
| MSTRG. 32699. 5  | coding    | 0. 506      | 0    | 1359 | 1515  |
| MSTRG. 32709. 11 | noncoding | -0. 0098304 | 0    | 138  | 364   |
| MSTRG. 32712. 1  | coding    | 0. 14       | 24   | 3348 | 12883 |
| MSTRG. 32719. 2  | coding    | 0. 303      | 282  | 2208 | 6230  |
| MSTRG. 32720. 1  | noncoding | -0. 069632  | 7410 | 7998 | 13803 |
| MSTRG. 32718. 2  | noncoding | -0. 0172032 | 3    | 153  | 1389  |
| MSTRG. 32723. 2  | noncoding | -0. 0446464 | 132  | 312  | 3800  |
| MSTRG. 32723. 3  | noncoding | -0. 0446464 | 126  | 306  | 3957  |
| MSTRG. 32723. 10 | noncoding | -0. 0446464 | 75   | 255  | 3619  |
| MSTRG. 32723. 8  | noncoding | -0. 0770048 | 3453 | 3687 | 3843  |
| MSTRG. 32723. 7  | noncoding | -0. 0704512 | 3615 | 3852 | 4006  |
| MSTRG. 32723. 11 | coding    | 0. 07       | 312  | 474  | 3840  |
| MSTRG. 32723. 9  | noncoding | -0. 0311296 | 165  | 330  | 3695  |
| MSTRG. 32723. 12 | noncoding | -0. 0446464 | 132  | 312  | 3838  |
| MSTRG. 32723. 14 | noncoding | -0. 0446464 | 132  | 312  | 3837  |
| MSTRG. 32723. 16 | noncoding | -0. 0446464 | 132  | 312  | 3838  |
| MSTRG. 32723. 13 | coding    | 0. 167      | 0    | 219  | 2354  |
| MSTRG. 32723. 15 | noncoding | -0. 0647168 | 3444 | 3666 | 3822  |
| MSTRG. 32723. 17 | noncoding | -0. 0446464 | 42   | 222  | 2802  |
| MSTRG. 32723. 18 | noncoding | -0. 0638976 | 0    | 216  | 3856  |
| MSTRG. 32721. 5  | coding    | 0. 107      | 378  | 807  | 1371  |
| MSTRG. 32721. 6  | coding    | 0. 107      | 624  | 1053 | 1618  |
| MSTRG. 32730. 1  | coding    | 0. 07       | 0    | 879  | 2079  |
| MSTRG. 32731. 1  | noncoding | -0. 08192   | 33   | 78   | 236   |
| MSTRG. 32732. 1  | noncoding | -0. 0004096 | 1059 | 1158 | 1787  |
| MSTRG. 32730. 3  | noncoding | -0. 083968  | 1398 | 1809 | 1963  |
| MSTRG. 32738. 1  | coding    | 0. 261      | 114  | 1638 | 2798  |
| MSTRG. 32738. 2  | coding    | 0. 264      | 9    | 1584 | 2746  |
| MSTRG. 32738. 4  | coding    | 0. 286      | 24   | 3333 | 4493  |
| MSTRG. 32738. 5  | coding    | 0. 261      | 24   | 1614 | 2774  |
| MSTRG. 32738. 6  | coding    | 0. 263      | 24   | 1605 | 2765  |
| MSTRG. 32738. 7  | coding    | 0. 257      | 3603 | 5115 | 6276  |
| MSTRG. 32739. 1  | coding    | 0. 152      | 0    | 3948 | 4380  |
| MSTRG. 32740. 1  | noncoding | -0. 045056  | 63   | 96   | 805   |
| MSTRG. 32747. 4  | coding    | 0. 121      | 753  | 1584 | 9127  |
| MSTRG. 32747. 9  | coding    | 0. 111      | 33   | 834  | 1088  |



|                  |           |             |       |       |       |
|------------------|-----------|-------------|-------|-------|-------|
| MSTRG. 32749. 1  | noncoding | -0. 04096   | 1719  | 1959  | 2113  |
| MSTRG. 32751. 3  | coding    | 0. 14       | 2208  | 3117  | 3629  |
| MSTRG. 32751. 2  | coding    | 0. 14       | 2247  | 3156  | 3670  |
| MSTRG. 32752. 1  | noncoding | -0. 126976  | 81    | 141   | 294   |
| MSTRG. 32749. 2  | noncoding | -0. 147456  | 345   | 405   | 892   |
| MSTRG. 32752. 2  | coding    | 0. 188      | 264   | 693   | 916   |
| MSTRG. 32752. 4  | coding    | 0. 188      | 195   | 624   | 843   |
| MSTRG. 32752. 5  | coding    | 0. 236      | 0     | 327   | 548   |
| MSTRG. 32752. 6  | coding    | 0. 236      | 0     | 327   | 548   |
| MSTRG. 32752. 7  | coding    | 0. 284      | 0     | 303   | 524   |
| MSTRG. 32752. 8  | noncoding | -0. 012288  | 159   | 300   | 524   |
| MSTRG. 32752. 9  | coding    | 0. 316      | 0     | 405   | 675   |
| MSTRG. 32754. 1  | noncoding | -0. 0073728 | 60    | 186   | 1623  |
| MSTRG. 32754. 2  | noncoding | -0. 004096  | 282   | 321   | 841   |
| MSTRG. 32754. 3  | noncoding | -0. 004096  | 162   | 201   | 468   |
| MSTRG. 32755. 1  | noncoding | -0. 0073728 | 171   | 297   | 604   |
| MSTRG. 32754. 4  | noncoding | -0. 0073728 | 144   | 270   | 428   |
| MSTRG. 32756. 1  | noncoding | -0. 0004096 | 0     | 0     | 404   |
| MSTRG. 32757. 1  | noncoding | -0. 028672  | 120   | 303   | 1863  |
| MSTRG. 32760. 1  | noncoding | -0. 0110592 | 0     | 114   | 490   |
| MSTRG. 32765. 1  | noncoding | -0. 0004096 | 1932  | 2118  | 3894  |
| MSTRG. 32773. 1  | coding    | 0. 106      | 12489 | 12768 | 16420 |
| MSTRG. 32767. 1  | coding    | 0. 175      | 99    | 711   | 1526  |
| MSTRG. 32781. 1  | noncoding | -0. 0700416 | 0     | 918   | 1513  |
| MSTRG. 32782. 1  | coding    | 0. 294      | 0     | 771   | 1415  |
| MSTRG. 32796. 3  | noncoding | -0. 032768  | 408   | 513   | 669   |
| MSTRG. 32796. 5  | noncoding | -0. 032768  | 408   | 513   | 669   |
| MSTRG. 32796. 4  | noncoding | -0. 0098304 | 129   | 279   | 1025  |
| MSTRG. 32796. 6  | noncoding | -0. 0221184 | 1083  | 1896  | 2637  |
| MSTRG. 32796. 7  | coding    | 0. 196      | 990   | 1839  | 2793  |
| MSTRG. 32796. 9  | coding    | 0. 159      | 867   | 1617  | 2283  |
| MSTRG. 32796. 10 | coding    | 0. 196      | 867   | 1716  | 2668  |
| MSTRG. 32796. 8  | coding    | 0. 196      | 867   | 1716  | 2668  |
| MSTRG. 32796. 11 | coding    | 0. 196      | 846   | 1695  | 2601  |
| MSTRG. 32796. 12 | coding    | 0. 197      | 858   | 2283  | 3188  |
| MSTRG. 32796. 14 | noncoding | -0. 0589824 | 0     | 84    | 238   |
| MSTRG. 32796. 13 | coding    | 0. 196      | 336   | 1185  | 2138  |
| MSTRG. 32796. 15 | coding    | 0. 159      | 327   | 1077  | 2460  |
| MSTRG. 32796. 16 | coding    | 0. 159      | 582   | 1332  | 1998  |
| MSTRG. 32796. 17 | coding    | 0. 159      | 372   | 1122  | 2508  |
| MSTRG. 32796. 18 | coding    | 0. 186      | 366   | 1215  | 2168  |
| MSTRG. 32796. 19 | coding    | 0. 191      | 315   | 1164  | 2116  |
| MSTRG. 32796. 20 | coding    | 0. 191      | 171   | 1020  | 1950  |
| MSTRG. 32798. 3  | coding    | 0. 168      | 543   | 1455  | 1912  |
| MSTRG. 32798. 4  | coding    | 0. 149      | 288   | 1254  | 1674  |
| MSTRG. 32798. 5  | coding    | 0. 168      | 282   | 1194  | 1652  |
| MSTRG. 32798. 2  | coding    | 0. 151      | 327   | 1293  | 1715  |
| MSTRG. 32798. 6  | coding    | 0. 154      | 300   | 1266  | 1656  |
| MSTRG. 32798. 8  | coding    | 0. 151      | 363   | 1329  | 2881  |
| MSTRG. 32789. 1  | coding    | 0. 07       | 30    | 1134  | 3853  |
| MSTRG. 32792. 1  | noncoding | -0. 0692224 | 210   | 285   | 535   |
| MSTRG. 32801. 1  | coding    | 0. 168      | 0     | 2790  | 5015  |
| MSTRG. 32801. 3  | coding    | 0. 173      | 0     | 2820  | 4849  |
| MSTRG. 32801. 4  | coding    | 0. 141      | 9     | 2085  | 2661  |

|                 |           |             |       |       |       |
|-----------------|-----------|-------------|-------|-------|-------|
| MSTRG. 32802. 1 | noncoding | -0. 012288  | 135   | 261   | 416   |
| MSTRG. 32814. 2 | coding    | 0. 204      | 246   | 1446  | 5178  |
| MSTRG. 32815. 1 | noncoding | -0. 065536  | 93    | 126   | 280   |
| MSTRG. 32821. 1 | coding    | 0. 105      | 1833  | 3708  | 6535  |
| MSTRG. 32821. 2 | coding    | 0. 105      | 1452  | 3327  | 6154  |
| MSTRG. 32821. 3 | coding    | 0. 105      | 1128  | 3003  | 5759  |
| MSTRG. 32821. 4 | coding    | 0. 105      | 1089  | 2964  | 3633  |
| MSTRG. 32821. 5 | coding    | 0. 105      | 1086  | 2961  | 3600  |
| MSTRG. 32819. 1 | noncoding | -0. 0004096 | 0     | 0     | 301   |
| MSTRG. 32820. 2 | noncoding | -0. 063488  | 0     | 576   | 1588  |
| MSTRG. 32827. 1 | coding    | 0. 137      | 0     | 291   | 548   |
| MSTRG. 32828. 1 | noncoding | -0. 0024576 | 231   | 291   | 511   |
| MSTRG. 32832. 1 | noncoding | -0. 0004096 | 0     | 0     | 217   |
| MSTRG. 32832. 2 | noncoding | -0. 0004096 | 0     | 0     | 382   |
| MSTRG. 32836. 1 | coding    | 0. 215      | 1035  | 2784  | 6366  |
| MSTRG. 32837. 1 | noncoding | -0. 155648  | 0     | 15    | 329   |
| MSTRG. 32841. 1 | noncoding | -0. 0344064 | 198   | 543   | 1449  |
| MSTRG. 32842. 7 | noncoding | -0. 018432  | 51    | 210   | 611   |
| MSTRG. 32842. 8 | noncoding | -0. 018432  | 51    | 210   | 611   |
| MSTRG. 32842. 6 | noncoding | -0. 018432  | 57    | 216   | 618   |
| MSTRG. 32842. 2 | noncoding | -0. 018432  | 60    | 219   | 621   |
| MSTRG. 32839. 1 | noncoding | -0. 069632  | 342   | 360   | 735   |
| MSTRG. 32839. 2 | noncoding | -0. 069632  | 351   | 369   | 552   |
| MSTRG. 32839. 3 | noncoding | -0. 069632  | 342   | 360   | 530   |
| MSTRG. 32840. 1 | noncoding | -0. 016384  | 30    | 54    | 290   |
| MSTRG. 32849. 1 | noncoding | -0. 069632  | 1437  | 1491  | 1681  |
| MSTRG. 32859. 1 | noncoding | -0. 0569344 | 621   | 624   | 778   |
| MSTRG. 32860. 1 | noncoding | -0. 0155648 | 2469  | 2631  | 25547 |
| MSTRG. 32862. 1 | noncoding | -0. 0086016 | 3060  | 3273  | 3631  |
| MSTRG. 32859. 2 | noncoding | -0. 045056  | 381   | 504   | 4443  |
| MSTRG. 32855. 1 | noncoding | -0. 036864  | 135   | 147   | 374   |
| MSTRG. 32866. 1 | noncoding | -0. 045056  | 195   | 297   | 2736  |
| MSTRG. 32867. 1 | noncoding | -0. 0094208 | 1281  | 1401  | 2392  |
| MSTRG. 32867. 2 | noncoding | -0. 077824  | 2031  | 2076  | 4336  |
| MSTRG. 32867. 3 | noncoding | -0. 0376832 | 0     | 54    | 2616  |
| MSTRG. 32867. 4 | noncoding | -0. 110592  | 2499  | 2562  | 7193  |
| MSTRG. 32867. 5 | coding    | 0. 087      | 17226 | 17439 | 24017 |
| MSTRG. 32867. 6 | noncoding | -0. 073728  | 1641  | 1659  | 2423  |
| MSTRG. 32867. 7 | noncoding | -0. 0290816 | 1041  | 1212  | 6538  |
| MSTRG. 32863. 5 | coding    | 0. 14       | 0     | 1740  | 2005  |
| MSTRG. 32863. 6 | coding    | 0. 136      | 0     | 1776  | 3695  |
| MSTRG. 32864. 2 | noncoding | -0. 057344  | 21    | 342   | 1040  |
| MSTRG. 32874. 3 | coding    | 0. 242      | 0     | 4107  | 8577  |
| MSTRG. 32874. 5 | coding    | 0. 223      | 4566  | 8394  | 12940 |
| MSTRG. 32874. 6 | coding    | 0. 121      | 123   | 1383  | 2800  |
| MSTRG. 32876. 1 | noncoding | -0. 059392  | 1356  | 1479  | 4440  |
| MSTRG. 32877. 1 | noncoding | -0. 04096   | 13641 | 13830 | 14115 |
| MSTRG. 32869. 1 | coding    | 0. 165      | 0     | 348   | 501   |
| MSTRG. 32880. 1 | noncoding | -0. 0712704 | 30    | 378   | 532   |
| MSTRG. 32884. 1 | coding    | 0. 229      | 300   | 726   | 1149  |
| MSTRG. 32888. 1 | noncoding | -0. 0888832 | 135   | 489   | 643   |
| MSTRG. 32889. 4 | noncoding | -0. 0462848 | 13569 | 16713 | 17154 |
| MSTRG. 32889. 3 | coding    | 0. 204      | 288   | 3717  | 5202  |
| MSTRG. 32889. 6 | noncoding | -0. 0454656 | 7506  | 10737 | 10893 |

|                 |           |             |      |      |       |
|-----------------|-----------|-------------|------|------|-------|
| MSTRG. 32889. 5 | coding    | 0. 199      | 0    | 2595 | 5248  |
| MSTRG. 32889. 7 | coding    | 0. 176      | 0    | 3126 | 5800  |
| MSTRG. 32889. 8 | coding    | 0. 184      | 0    | 2970 | 5383  |
| MSTRG. 32889. 9 | noncoding | -0. 079872  | 7557 | 7980 | 8195  |
| MSTRG. 32892. 1 | coding    | 0. 085      | 378  | 2061 | 3738  |
| MSTRG. 32892. 5 | noncoding | -0. 047104  | 1500 | 1797 | 11240 |
| MSTRG. 32893. 4 | coding    | 0. 179      | 3963 | 5829 | 6641  |
| MSTRG. 32895. 3 | coding    | 0. 138      | 201  | 1746 | 1957  |
| MSTRG. 32897. 1 | noncoding | -0. 004096  | 402  | 474  | 1024  |
| MSTRG. 32899. 1 | noncoding | -0. 04096   | 6    | 105  | 261   |
| MSTRG. 32906. 3 | coding    | 0. 271      | 705  | 1845 | 2342  |
| MSTRG. 32906. 4 | coding    | 0. 252      | 0    | 1296 | 1737  |
| MSTRG. 32906. 6 | coding    | 0. 251      | 894  | 2187 | 2546  |
| MSTRG. 32906. 5 | coding    | 0. 252      | 105  | 1401 | 1759  |
| MSTRG. 32907. 1 | noncoding | -0. 073728  | 93   | 171  | 326   |
| MSTRG. 32916. 1 | coding    | 0. 099      | 0    | 606  | 985   |
| MSTRG. 32921. 1 | coding    | 0. 078      | 0    | 168  | 737   |
| MSTRG. 32922. 2 | coding    | 0. 114      | 0    | 1734 | 2001  |
| MSTRG. 32922. 4 | coding    | 0. 091      | 246  | 1665 | 1931  |
| MSTRG. 32925. 1 | coding    | 0. 038      | 201  | 342  | 667   |
| MSTRG. 32925. 2 | noncoding | -0. 004096  | 1920 | 2064 | 2391  |
| MSTRG. 32927. 1 | noncoding | -0. 0249856 | 228  | 387  | 6400  |
| MSTRG. 32929. 1 | coding    | 0. 424      | 60   | 1473 | 2083  |
| MSTRG. 32930. 2 | coding    | 0. 273      | 0    | 1944 | 2455  |
| MSTRG. 32933. 1 | coding    | 0. 172      | 0    | 828  | 1150  |
| MSTRG. 32936. 6 | noncoding | -0. 0032768 | 7437 | 7734 | 7889  |
| MSTRG. 32936. 7 | noncoding | -0. 0602112 | 2052 | 2451 | 3654  |
| MSTRG. 32936. 8 | noncoding | -0. 0602112 | 2052 | 2451 | 3715  |
| MSTRG. 32936. 9 | noncoding | -0. 0602112 | 2052 | 2451 | 3750  |
| MSTRG. 32934. 2 | coding    | 0. 295      | 90   | 2394 | 3558  |
| MSTRG. 32934. 3 | coding    | 0. 295      | 90   | 2466 | 3396  |
| MSTRG. 32934. 4 | coding    | 0. 284      | 90   | 2676 | 3606  |
| MSTRG. 32934. 5 | coding    | 0. 287      | 90   | 2622 | 3550  |
| MSTRG. 32935. 1 | coding    | 0. 188      | 177  | 1488 | 6297  |
| MSTRG. 32937. 2 | coding    | 0. 445      | 0    | 1047 | 1329  |
| MSTRG. 32939. 2 | coding    | 0. 437      | 0    | 1974 | 3393  |
| MSTRG. 32943. 1 | noncoding | -0. 0438272 | 255  | 429  | 653   |
| MSTRG. 32945. 2 | coding    | 0. 452      | 0    | 747  | 919   |
| MSTRG. 32946. 1 | coding    | 0. 295      | 0    | 696  | 862   |
| MSTRG. 32951. 4 | coding    | 0. 385      | 972  | 7317 | 8988  |
| MSTRG. 32953. 1 | coding    | 0. 283      | 168  | 1899 | 2781  |
| MSTRG. 32957. 5 | coding    | 0. 518      | 0    | 8184 | 8352  |
| MSTRG. 32957. 3 | coding    | 0. 511      | 0    | 8247 | 8414  |
| MSTRG. 32954. 2 | noncoding | -0. 0782336 | 267  | 627  | 1118  |
| MSTRG. 32961. 2 | coding    | 0. 55       | 0    | 1335 | 2263  |
| MSTRG. 32964. 1 | coding    | 0. 51       | 0    | 2409 | 2562  |
| MSTRG. 32968. 2 | coding    | 0. 352      | 312  | 1833 | 2189  |
| MSTRG. 32984. 2 | noncoding | -0. 0958464 | 2196 | 2697 | 3010  |
| MSTRG. 32984. 4 | noncoding | -0. 0958464 | 48   | 549  | 873   |
| MSTRG. 32984. 3 | noncoding | -0. 0970752 | 0    | 498  | 822   |
| MSTRG. 32984. 5 | noncoding | -0. 0958464 | 2196 | 2697 | 3020  |
| MSTRG. 32981. 1 | coding    | 0. 201      | 0    | 1104 | 1274  |
| MSTRG. 32988. 1 | noncoding | -0. 0442368 | 0    | 12   | 413   |
| MSTRG. 32992. 1 | noncoding | -0. 0004096 | 0    | 0    | 203   |

|                 |           |             |      |      |       |
|-----------------|-----------|-------------|------|------|-------|
| MSTRG. 33013. 3 | coding    | 0. 111      | 297  | 3324 | 5847  |
| MSTRG. 33013. 4 | coding    | 0. 108      | 42   | 2991 | 4192  |
| MSTRG. 33014. 1 | coding    | 0. 172      | 4146 | 4449 | 8443  |
| MSTRG. 33018. 1 | noncoding | -0. 073728  | 1053 | 1134 | 8152  |
| MSTRG. 33003. 1 | noncoding | -0. 108544  | 0    | 33   | 203   |
| MSTRG. 33021. 1 | coding    | 0. 118      | 198  | 3432 | 9375  |
| MSTRG. 33021. 2 | coding    | 0. 119      | 147  | 3333 | 3488  |
| MSTRG. 33021. 3 | coding    | 0. 114      | 171  | 3009 | 8950  |
| MSTRG. 33023. 1 | noncoding | -0. 0176128 | 3393 | 3474 | 5390  |
| MSTRG. 33024. 1 | noncoding | -0. 069632  | 543  | 594  | 780   |
| MSTRG. 33025. 1 | noncoding | -0. 045056  | 1599 | 1665 | 2600  |
| MSTRG. 33031. 5 | coding    | 0. 116      | 492  | 1062 | 1628  |
| MSTRG. 33031. 6 | coding    | 0. 116      | 153  | 723  | 1289  |
| MSTRG. 33033. 2 | coding    | 0. 173      | 162  | 1644 | 2761  |
| MSTRG. 33036. 1 | noncoding | -0. 0712704 | 2523 | 2586 | 4070  |
| MSTRG. 33036. 3 | noncoding | -0. 006144  | 3807 | 3873 | 8516  |
| MSTRG. 33050. 3 | noncoding | -0. 0004096 | 0    | 0    | 1108  |
| MSTRG. 33050. 2 | noncoding | -0. 024576  | 1743 | 1806 | 2049  |
| MSTRG. 33050. 5 | noncoding | -0. 0004096 | 0    | 0    | 784   |
| MSTRG. 33054. 1 | noncoding | -0. 0045056 | 2136 | 2250 | 2466  |
| MSTRG. 33056. 1 | coding    | 0. 176      | 0    | 1203 | 1952  |
| MSTRG. 33063. 2 | coding    | 0. 173      | 180  | 1185 | 1912  |
| MSTRG. 33063. 3 | coding    | 0. 168      | 312  | 1371 | 2021  |
| MSTRG. 33068. 1 | coding    | 0. 251      | 78   | 954  | 1830  |
| MSTRG. 33069. 1 | coding    | 0. 24       | 0    | 1305 | 1760  |
| MSTRG. 33083. 6 | coding    | 0. 158      | 552  | 1236 | 1954  |
| MSTRG. 33088. 1 | coding    | 0. 117      | 45   | 966  | 9613  |
| MSTRG. 33090. 2 | coding    | 0. 127      | 4083 | 4779 | 11838 |
| MSTRG. 33090. 3 | noncoding | -0. 0151552 | 1068 | 1122 | 3687  |
| MSTRG. 33097. 2 | coding    | 0. 353      | 0    | 735  | 1967  |
| MSTRG. 33101. 1 | coding    | 0. 098      | 225  | 4932 | 8176  |
| MSTRG. 33102. 5 | coding    | 0. 089      | 1410 | 3246 | 3685  |
| MSTRG. 33102. 4 | coding    | 0. 089      | 1308 | 3144 | 4919  |
| MSTRG. 33102. 6 | coding    | 0. 089      | 1230 | 3066 | 4842  |
| MSTRG. 33114. 1 | coding    | 0. 066      | 279  | 2052 | 4065  |
| MSTRG. 33114. 2 | coding    | 0. 066      | 279  | 2052 | 4065  |
| MSTRG. 33114. 3 | coding    | 0. 113      | 33   | 639  | 959   |
| MSTRG. 33114. 4 | coding    | 0. 066      | 9    | 1782 | 3783  |
| MSTRG. 33114. 5 | coding    | 0. 066      | 9    | 1782 | 3794  |
| MSTRG. 33114. 6 | coding    | 0. 065      | 0    | 1767 | 3766  |
| MSTRG. 33114. 7 | coding    | 0. 063      | 48   | 1707 | 3606  |
| MSTRG. 33114. 8 | coding    | 0. 087      | 846  | 1467 | 3365  |
| MSTRG. 33114. 9 | coding    | 0. 087      | 816  | 1437 | 3333  |
| MSTRG. 33109. 1 | noncoding | -0. 0004096 | 0    | 0    | 630   |
| MSTRG. 33108. 3 | noncoding | -0. 0036864 | 789  | 927  | 3198  |
| MSTRG. 33120. 2 | coding    | 0. 112      | 0    | 909  | 1717  |
| MSTRG. 33124. 3 | noncoding | -0. 126976  | 267  | 357  | 1751  |
| MSTRG. 33124. 1 | coding    | 0. 172      | 1533 | 1950 | 2103  |
| MSTRG. 33127. 4 | coding    | 0. 381      | 27   | 351  | 1696  |
| MSTRG. 33127. 5 | coding    | 0. 522      | 0    | 756  | 2102  |
| MSTRG. 33128. 1 | coding    | 0. 24       | 0    | 2088 | 6715  |
| MSTRG. 33131. 1 | noncoding | -0. 004096  | 1677 | 1809 | 2137  |
| MSTRG. 33132. 1 | noncoding | -0. 0032768 | 1686 | 1833 | 2405  |
| MSTRG. 33131. 2 | noncoding | -0. 0344064 | 1911 | 2118 | 2446  |

|                 |           |             |       |       |       |
|-----------------|-----------|-------------|-------|-------|-------|
| MSTRG. 33131. 4 | coding    | 0. 323      | 240   | 996   | 1578  |
| MSTRG. 33133. 1 | noncoding | -0. 1568768 | 8061  | 8349  | 8503  |
| MSTRG. 33129. 2 | coding    | 0. 183      | 42    | 1014  | 2045  |
| MSTRG. 33135. 1 | coding    | 0. 111      | 213   | 954   | 2720  |
| MSTRG. 33138. 2 | coding    | 0. 366      | 0     | 489   | 679   |
| MSTRG. 33141. 2 | coding    | 0. 091      | 69    | 507   | 2609  |
| MSTRG. 33144. 1 | coding    | 0. 097      | 702   | 1971  | 3371  |
| MSTRG. 33144. 2 | coding    | 0. 097      | 600   | 1869  | 3270  |
| MSTRG. 33150. 2 | coding    | 0. 359      | 201   | 672   | 26017 |
| MSTRG. 33151. 1 | noncoding | -0. 0258048 | 10491 | 10761 | 15596 |
| MSTRG. 33148. 1 | coding    | 0. 155      | 147   | 1146  | 1919  |
| MSTRG. 33155. 2 | noncoding | -0. 057344  | 1452  | 1500  | 1662  |
| MSTRG. 33158. 1 | coding    | 0. 134      | 7260  | 9018  | 15961 |
| MSTRG. 33161. 1 | coding    | 0. 051      | 1938  | 4215  | 5103  |
| MSTRG. 33161. 2 | coding    | 0. 051      | 1338  | 3693  | 3914  |
| MSTRG. 33161. 3 | coding    | 0. 053      | 540   | 3051  | 3274  |
| MSTRG. 33164. 1 | coding    | 0. 16       | 420   | 771   | 1510  |
| MSTRG. 33165. 1 | coding    | 0. 16       | 420   | 771   | 1510  |
| MSTRG. 33166. 1 | coding    | 0. 144      | 711   | 1050  | 1705  |
| MSTRG. 33166. 2 | coding    | 0. 144      | 729   | 1068  | 1793  |
| MSTRG. 33168. 1 | noncoding | -0. 038912  | 0     | 60    | 256   |
| MSTRG. 33172. 1 | noncoding | -0. 0004096 | 0     | 0     | 202   |
| MSTRG. 33179. 1 | coding    | 0. 122      | 0     | 438   | 2434  |
| MSTRG. 33189. 1 | noncoding | -0. 0237568 | 417   | 753   | 994   |
| MSTRG. 33224. 2 | coding    | 0. 097      | 1284  | 2088  | 3813  |
| MSTRG. 33224. 3 | coding    | 0. 097      | 771   | 1575  | 3298  |
| MSTRG. 33223. 1 | noncoding | -0. 004096  | 0     | 81    | 239   |
| MSTRG. 33234. 1 | noncoding | -0. 045056  | 111   | 114   | 364   |
| MSTRG. 33248. 1 | noncoding | -0. 04096   | 225   | 288   | 824   |
| MSTRG. 33249. 1 | noncoding | -0. 0270336 | 12    | 90    | 1255  |
| MSTRG. 33245. 1 | noncoding | -0. 0159744 | 174   | 465   | 2609  |
| MSTRG. 33278. 2 | coding    | 0. 247      | 639   | 1302  | 1489  |
| MSTRG. 33280. 1 | coding    | 0. 38       | 0     | 879   | 3182  |
| MSTRG. 33282. 4 | noncoding | -0. 0110592 | 543   | 669   | 5401  |
| MSTRG. 33284. 1 | coding    | 0. 246      | 0     | 5277  | 5545  |
| MSTRG. 33287. 3 | coding    | 0. 306      | 195   | 1476  | 2710  |
| MSTRG. 33301. 2 | coding    | 0. 421      | 837   | 1485  | 2881  |
| MSTRG. 33306. 3 | noncoding | -0. 024576  | 474   | 609   | 3817  |
| MSTRG. 33309. 1 | coding    | 0. 249      | 870   | 1884  | 11481 |
| MSTRG. 33309. 3 | coding    | 0. 304      | 1107  | 2577  | 3492  |
| MSTRG. 33319. 1 | noncoding | -0. 04096   | 24    | 75    | 251   |
| MSTRG. 33322. 3 | coding    | 0. 212      | 10677 | 13011 | 15183 |
| MSTRG. 33322. 4 | coding    | 0. 212      | 10647 | 12981 | 15279 |
| MSTRG. 33322. 5 | noncoding | -0. 0180224 | 6843  | 6969  | 12399 |
| MSTRG. 33323. 1 | noncoding | -0. 0192512 | 14655 | 14772 | 16673 |
| MSTRG. 33325. 2 | coding    | 0. 461      | 231   | 3162  | 3443  |
| MSTRG. 33325. 4 | coding    | 0. 466      | 0     | 2901  | 3205  |
| MSTRG. 33325. 5 | coding    | 0. 444      | 0     | 2700  | 3010  |
| MSTRG. 33333. 1 | coding    | 0. 434      | 1215  | 2892  | 4153  |
| MSTRG. 33333. 2 | coding    | 0. 411      | 1236  | 2958  | 3563  |
| MSTRG. 33333. 5 | coding    | 0. 411      | 2997  | 4719  | 5324  |
| MSTRG. 33333. 4 | coding    | 0. 43       | 2739  | 4281  | 7127  |
| MSTRG. 33328. 1 | noncoding | -0. 090112  | 891   | 1182  | 4716  |
| MSTRG. 33329. 1 | coding    | 0. 365      | 147   | 2172  | 2561  |

|                  |           |             |       |       |       |
|------------------|-----------|-------------|-------|-------|-------|
| MSTRG. 33329. 2  | coding    | 0. 359      | 90    | 2553  | 2729  |
| MSTRG. 33329. 4  | coding    | 0. 37       | 0     | 1959  | 2350  |
| MSTRG. 33329. 5  | coding    | 0. 235      | 57    | 753   | 928   |
| MSTRG. 33338. 1  | noncoding | -0. 0741376 | 183   | 597   | 2349  |
| MSTRG. 33338. 3  | coding    | 0. 437      | 0     | 126   | 2387  |
| MSTRG. 33339. 1  | noncoding | -0. 0237568 | 51    | 84    | 426   |
| MSTRG. 33348. 1  | noncoding | -0. 036864  | 72    | 180   | 357   |
| MSTRG. 33367. 7  | coding    | 0. 262      | 330   | 2829  | 3271  |
| MSTRG. 33373. 2  | coding    | 0. 394      | 0     | 1434  | 3769  |
| MSTRG. 33373. 3  | coding    | 0. 391      | 0     | 1605  | 3940  |
| MSTRG. 33373. 5  | coding    | 0. 413      | 0     | 651   | 3569  |
| MSTRG. 33373. 4  | coding    | 0. 316      | 216   | 1704  | 4039  |
| MSTRG. 33373. 8  | coding    | 0. 348      | 453   | 1635  | 2053  |
| MSTRG. 33374. 1  | noncoding | -0. 0585728 | 1191  | 1368  | 3449  |
| MSTRG. 33369. 2  | coding    | 0. 375      | 207   | 1452  | 2929  |
| MSTRG. 33369. 3  | coding    | 0. 383      | 0     | 1473  | 2946  |
| MSTRG. 33376. 1  | noncoding | -0. 1232896 | 111   | 399   | 560   |
| MSTRG. 33386. 1  | noncoding | -0. 0626688 | 228   | 246   | 706   |
| MSTRG. 33388. 1  | noncoding | -0. 049152  | 462   | 468   | 969   |
| MSTRG. 33389. 2  | coding    | 0. 176      | 96    | 2661  | 2860  |
| MSTRG. 33391. 1  | coding    | 0. 152      | 0     | 3813  | 7427  |
| MSTRG. 33398. 2  | coding    | 0. 449      | 0     | 540   | 2163  |
| MSTRG. 33398. 1  | coding    | 0. 403      | 0     | 609   | 2243  |
| MSTRG. 33400. 2  | noncoding | -0. 1523712 | 549   | 2256  | 3426  |
| MSTRG. 33400. 1  | noncoding | -0. 1490944 | 606   | 2424  | 3266  |
| MSTRG. 33400. 5  | noncoding | -0. 1490944 | 561   | 2379  | 2798  |
| MSTRG. 33403. 5  | coding    | 0. 201      | 1194  | 3561  | 3916  |
| MSTRG. 33404. 1  | noncoding | -0. 0106496 | 756   | 921   | 2238  |
| MSTRG. 33405. 2  | coding    | 0. 365      | 345   | 2043  | 2457  |
| MSTRG. 33405. 3  | coding    | 0. 361      | 120   | 1656  | 3297  |
| MSTRG. 33417. 1  | noncoding | -0. 0315392 | 318   | 324   | 518   |
| MSTRG. 33419. 13 | coding    | 0. 264      | 0     | 261   | 560   |
| MSTRG. 33419. 20 | coding    | 0. 189      | 228   | 459   | 691   |
| MSTRG. 33419. 23 | coding    | 0. 224      | 96    | 324   | 553   |
| MSTRG. 33419. 24 | coding    | 0. 233      | 96    | 327   | 556   |
| MSTRG. 33408. 3  | coding    | 0. 468      | 894   | 2199  | 2846  |
| MSTRG. 33423. 3  | coding    | 0. 368      | 12    | 4515  | 4668  |
| MSTRG. 33423. 4  | coding    | 0. 378      | 0     | 4641  | 4794  |
| MSTRG. 33424. 1  | coding    | 0. 32       | 33    | 3861  | 5153  |
| MSTRG. 33424. 2  | coding    | 0. 344      | 51    | 3738  | 4988  |
| MSTRG. 33424. 3  | coding    | 0. 43       | 0     | 3771  | 4299  |
| MSTRG. 33443. 13 | coding    | 0. 267      | 465   | 10239 | 10894 |
| MSTRG. 33443. 9  | coding    | 0. 233      | 1014  | 13428 | 14085 |
| MSTRG. 33443. 3  | coding    | 0. 229      | 486   | 13581 | 14237 |
| MSTRG. 33443. 11 | coding    | 0. 228      | 387   | 13527 | 14184 |
| MSTRG. 33443. 14 | coding    | 0. 228      | 507   | 13647 | 14304 |
| MSTRG. 33443. 6  | coding    | 0. 228      | 321   | 13461 | 14118 |
| MSTRG. 33443. 5  | coding    | 0. 228      | 222   | 13347 | 14003 |
| MSTRG. 33443. 15 | coding    | 0. 228      | 26766 | 39906 | 40284 |
| MSTRG. 33448. 8  | coding    | 0. 285      | 321   | 3435  | 5953  |
| MSTRG. 33450. 1  | coding    | 0. 209      | 0     | 2550  | 4350  |
| MSTRG. 33451. 1  | noncoding | -0. 02048   | 723   | 822   | 3584  |
| MSTRG. 33452. 1  | noncoding | -0. 04096   | 1842  | 1899  | 4050  |
| MSTRG. 33453. 1  | coding    | 0. 062      | 300   | 4911  | 9055  |

|                 |           |             |      |      |       |
|-----------------|-----------|-------------|------|------|-------|
| MSTRG. 33453. 2 | coding    | 0. 062      | 300  | 4911 | 9795  |
| MSTRG. 33453. 3 | coding    | 0. 062      | 300  | 4911 | 9795  |
| MSTRG. 33453. 4 | coding    | 0. 062      | 300  | 4911 | 8822  |
| MSTRG. 33453. 5 | coding    | 0. 062      | 300  | 4911 | 13472 |
| MSTRG. 33453. 6 | coding    | 0. 049      | 300  | 5010 | 5583  |
| MSTRG. 33430. 1 | noncoding | -0. 036864  | 84   | 162  | 317   |
| MSTRG. 33439. 2 | coding    | 0. 329      | 150  | 1902 | 2140  |
| MSTRG. 33439. 3 | coding    | 0. 339      | 9    | 1293 | 3945  |
| MSTRG. 33444. 1 | noncoding | -0. 069632  | 828  | 879  | 1359  |
| MSTRG. 33466. 2 | coding    | 0. 135      | 729  | 1053 | 2050  |
| MSTRG. 33467. 1 | noncoding | -0. 0004096 | 0    | 0    | 203   |
| MSTRG. 33482. 1 | coding    | 0. 304      | 120  | 1695 | 2061  |
| MSTRG. 33482. 3 | coding    | 0. 279      | 33   | 1794 | 2159  |
| MSTRG. 33483. 1 | coding    | 0. 107      | 312  | 753  | 1243  |
| MSTRG. 33482. 5 | coding    | 0. 319      | 0    | 2160 | 2524  |
| MSTRG. 33482. 6 | coding    | 0. 343      | 0    | 1695 | 2059  |
| MSTRG. 33482. 7 | coding    | 0. 338      | 0    | 1674 | 2038  |
| MSTRG. 33482. 8 | coding    | 0. 346      | 0    | 1665 | 2029  |
| MSTRG. 33519. 1 | coding    | 0. 231      | 201  | 2709 | 2898  |
| MSTRG. 33521. 1 | coding    | 0. 218      | 0    | 2643 | 3684  |
| MSTRG. 33525. 1 | noncoding | -0. 02048   | 0    | 60   | 447   |
| MSTRG. 33534. 1 | noncoding | -0. 016384  | 261  | 393  | 1085  |
| MSTRG. 33534. 2 | noncoding | -0. 016384  | 468  | 600  | 959   |
| MSTRG. 33535. 4 | noncoding | -0. 0524288 | 2556 | 3219 | 6928  |
| MSTRG. 33535. 5 | noncoding | -0. 0524288 | 2193 | 2856 | 5066  |
| MSTRG. 33535. 6 | coding    | 0. 345      | 33   | 594  | 4549  |
| MSTRG. 33536. 1 | coding    | 0. 183      | 96   | 321  | 480   |
| MSTRG. 33535. 7 | coding    | 0. 356      | 0    | 549  | 4745  |
| MSTRG. 33537. 1 | coding    | 0. 124      | 798  | 1059 | 1259  |
| MSTRG. 33535. 8 | noncoding | -0. 1093632 | 0    | 375  | 1636  |
| MSTRG. 33535. 9 | coding    | 0. 353      | 0    | 552  | 789   |
| MSTRG. 33546. 1 | coding    | 0. 105      | 51   | 1986 | 4691  |
| MSTRG. 33546. 3 | coding    | 0. 109      | 63   | 2031 | 4737  |
| MSTRG. 33548. 4 | coding    | 0. 042      | 258  | 7842 | 9209  |
| MSTRG. 33553. 1 | coding    | 0. 065      | 546  | 4539 | 6923  |
| MSTRG. 33553. 2 | coding    | 0. 065      | 450  | 4443 | 6827  |
| MSTRG. 33553. 3 | coding    | 0. 071      | 441  | 4302 | 6692  |
| MSTRG. 33555. 1 | noncoding | -0. 0278528 | 2124 | 2361 | 4517  |
| MSTRG. 33553. 8 | coding    | 0. 094      | 0    | 3915 | 4370  |
| MSTRG. 33550. 2 | coding    | 0. 336      | 0    | 429  | 715   |
| MSTRG. 33559. 4 | coding    | 0. 312      | 3144 | 5079 | 5313  |
| MSTRG. 33568. 1 | noncoding | -0. 02048   | 243  | 270  | 452   |
| MSTRG. 33573. 1 | coding    | 0. 241      | 1209 | 1854 | 11930 |
| MSTRG. 33577. 2 | coding    | 0. 09       | 276  | 1194 | 8498  |
| MSTRG. 33577. 1 | coding    | 0. 153      | 0    | 720  | 4437  |
| MSTRG. 33587. 3 | noncoding | -0. 0188416 | 75   | 246  | 622   |
| MSTRG. 33609. 2 | coding    | 0. 09       | 1998 | 2700 | 6822  |
| MSTRG. 33614. 1 | coding    | 0. 271      | 45   | 1074 | 1675  |
| MSTRG. 33613. 2 | coding    | 0. 216      | 0    | 1314 | 1630  |
| MSTRG. 33619. 1 | coding    | 0. 217      | 225  | 1161 | 1655  |
| MSTRG. 33619. 2 | coding    | 0. 228      | 252  | 1071 | 1566  |
| MSTRG. 33627. 2 | coding    | 0. 209      | 192  | 1140 | 1814  |
| MSTRG. 33629. 2 | coding    | 0. 453      | 300  | 2130 | 5266  |
| MSTRG. 33629. 1 | coding    | 0. 45       | 300  | 2136 | 3709  |

|                  |           |             |       |       |       |
|------------------|-----------|-------------|-------|-------|-------|
| MSTRG. 33629. 4  | coding    | 0. 454      | 291   | 2124  | 4470  |
| MSTRG. 33629. 6  | coding    | 0. 452      | 291   | 2127  | 3510  |
| MSTRG. 33629. 3  | coding    | 0. 45       | 291   | 2127  | 3714  |
| MSTRG. 33629. 5  | coding    | 0. 453      | 291   | 2127  | 3702  |
| MSTRG. 33629. 7  | coding    | 0. 453      | 285   | 2121  | 3707  |
| MSTRG. 33629. 10 | coding    | 0. 455      | 282   | 2118  | 3514  |
| MSTRG. 33629. 8  | coding    | 0. 455      | 282   | 2118  | 3502  |
| MSTRG. 33629. 9  | coding    | 0. 451      | 282   | 2118  | 3514  |
| MSTRG. 33629. 11 | coding    | 0. 454      | 222   | 2055  | 2518  |
| MSTRG. 33634. 2  | coding    | 0. 168      | 66    | 4248  | 4834  |
| MSTRG. 33634. 4  | coding    | 0. 154      | 519   | 1575  | 1973  |
| MSTRG. 33639. 6  | coding    | 0. 174      | 1062  | 2241  | 2918  |
| MSTRG. 33639. 7  | noncoding | -0. 075776  | 3303  | 3627  | 3782  |
| MSTRG. 33648. 2  | coding    | 0. 063      | 225   | 903   | 1113  |
| MSTRG. 33648. 5  | coding    | 0. 063      | 225   | 903   | 1162  |
| MSTRG. 33649. 1  | coding    | 0. 281      | 114   | 1380  | 3453  |
| MSTRG. 33649. 3  | coding    | 0. 281      | 87    | 1323  | 3208  |
| MSTRG. 33654. 2  | coding    | 0. 07       | 5628  | 6165  | 14771 |
| MSTRG. 33658. 1  | coding    | 0. 197      | 66    | 735   | 911   |
| MSTRG. 33662. 3  | coding    | 0. 052      | 252   | 2319  | 6463  |
| MSTRG. 33662. 4  | coding    | 0. 059      | 321   | 2373  | 7945  |
| MSTRG. 33661. 1  | coding    | 0. 115      | 45    | 564   | 3954  |
| MSTRG. 33664. 6  | coding    | 0. 311      | 0     | 2124  | 2617  |
| MSTRG. 33664. 2  | coding    | 0. 342      | 0     | 1869  | 3685  |
| MSTRG. 33664. 3  | coding    | 0. 318      | 0     | 2100  | 5684  |
| MSTRG. 33664. 4  | coding    | 0. 334      | 0     | 1893  | 3709  |
| MSTRG. 33664. 7  | coding    | 0. 356      | 0     | 1791  | 3607  |
| MSTRG. 33664. 8  | coding    | 0. 334      | 54    | 1791  | 3606  |
| MSTRG. 33664. 9  | coding    | 0. 331      | 9     | 1689  | 3504  |
| MSTRG. 33664. 10 | noncoding | -0. 045056  | 2328  | 2529  | 4111  |
| MSTRG. 33666. 1  | coding    | 0. 213      | 0     | 381   | 1828  |
| MSTRG. 33669. 2  | noncoding | -0. 0278528 | 4335  | 4581  | 4736  |
| MSTRG. 33669. 1  | noncoding | -0. 0278528 | 7659  | 7905  | 8060  |
| MSTRG. 33670. 2  | coding    | 0. 336      | 0     | 3576  | 3912  |
| MSTRG. 33676. 1  | coding    | 0. 103      | 903   | 2775  | 3330  |
| MSTRG. 33676. 2  | coding    | 0. 103      | 966   | 2838  | 3353  |
| MSTRG. 33676. 3  | coding    | 0. 103      | 381   | 2253  | 2768  |
| MSTRG. 33679. 1  | noncoding | -0. 0700416 | 0     | 132   | 1241  |
| MSTRG. 33679. 2  | noncoding | -0. 0036864 | 369   | 513   | 1186  |
| MSTRG. 33681. 1  | coding    | 0. 104      | 204   | 2859  | 3116  |
| MSTRG. 33682. 1  | noncoding | -0. 016384  | 363   | 405   | 1347  |
| MSTRG. 33683. 1  | coding    | 0. 058      | 255   | 3801  | 7932  |
| MSTRG. 33683. 2  | coding    | 0. 052      | 15    | 3471  | 7305  |
| MSTRG. 33683. 3  | coding    | 0. 04       | 90    | 1746  | 5604  |
| MSTRG. 33686. 2  | coding    | 0. 398      | 33    | 1713  | 1869  |
| MSTRG. 33687. 3  | coding    | 0. 107      | 1332  | 1731  | 3167  |
| MSTRG. 33688. 2  | coding    | 0. 156      | 3351  | 8022  | 11588 |
| MSTRG. 33690. 1  | noncoding | -0. 028672  | 4803  | 5052  | 22728 |
| MSTRG. 33690. 2  | noncoding | -0. 047104  | 4671  | 4869  | 8361  |
| MSTRG. 33692. 1  | noncoding | -0. 0684032 | 19425 | 19653 | 27856 |
| MSTRG. 33692. 2  | noncoding | -0. 0684032 | 14400 | 14628 | 39747 |
| MSTRG. 33692. 3  | noncoding | -0. 0147456 | 13188 | 13335 | 30001 |
| MSTRG. 33709. 1  | noncoding | -0. 0794624 | 312   | 1383  | 1551  |
| MSTRG. 33709. 2  | noncoding | -0. 0692224 | 0     | 1332  | 1486  |



|                 |           |             |       |       |       |
|-----------------|-----------|-------------|-------|-------|-------|
| MSTRG. 33709. 3 | noncoding | -0. 0753664 | 216   | 1419  | 1574  |
| MSTRG. 33709. 4 | noncoding | -0. 06144   | 411   | 1275  | 1448  |
| MSTRG. 33709. 5 | noncoding | -0. 0794624 | 282   | 1353  | 1521  |
| MSTRG. 33709. 6 | noncoding | -0. 0802816 | 213   | 1230  | 1386  |
| MSTRG. 33712. 1 | coding    | 0. 145      | 207   | 1548  | 2127  |
| MSTRG. 33712. 2 | coding    | 0. 033      | 147   | 1416  | 3609  |
| MSTRG. 33713. 1 | coding    | 0. 098      | 189   | 825   | 1470  |
| MSTRG. 33714. 1 | noncoding | -0. 049152  | 2697  | 2790  | 3659  |
| MSTRG. 33729. 1 | coding    | 0. 285      | 114   | 1188  | 4859  |
| MSTRG. 33731. 1 | coding    | 0. 173      | 483   | 2988  | 3205  |
| MSTRG. 33744. 3 | coding    | 0. 15       | 0     | 1305  | 2106  |
| MSTRG. 33754. 2 | noncoding | -0. 012288  | 96    | 363   | 592   |
| MSTRG. 33754. 1 | noncoding | -0. 0098304 | 96    | 363   | 592   |
| MSTRG. 33754. 4 | noncoding | -0. 0131072 | 96    | 363   | 592   |
| MSTRG. 33754. 5 | noncoding | -0. 0131072 | 96    | 363   | 592   |
| MSTRG. 33754. 3 | noncoding | -0. 0131072 | 165   | 432   | 663   |
| MSTRG. 33754. 6 | noncoding | -0. 0196608 | 0     | 243   | 471   |
| MSTRG. 33756. 2 | coding    | 0. 399      | 303   | 2298  | 2680  |
| MSTRG. 33760. 1 | noncoding | -0. 294912  | 54    | 84    | 456   |
| MSTRG. 33760. 2 | noncoding | -0. 0016384 | 360   | 453   | 681   |
| MSTRG. 33764. 1 | noncoding | -0. 004096  | 42    | 312   | 535   |
| MSTRG. 33758. 1 | noncoding | -0. 004096  | 48    | 321   | 552   |
| MSTRG. 33768. 1 | coding    | 0. 327      | 69    | 1902  | 3776  |
| MSTRG. 33768. 2 | coding    | 0. 327      | 12846 | 14679 | 20105 |
| MSTRG. 33768. 3 | coding    | 0. 244      | 14283 | 15015 | 18637 |
| MSTRG. 33768. 4 | coding    | 0. 417      | 0     | 1461  | 2571  |
| MSTRG. 33769. 1 | noncoding | -0. 0585728 | 3240  | 3480  | 7810  |
| MSTRG. 33770. 1 | noncoding | -0. 057344  | 5631  | 5871  | 6551  |
| MSTRG. 33768. 5 | noncoding | -0. 0057344 | 2124  | 2403  | 3276  |
| MSTRG. 33768. 6 | noncoding | -0. 0323584 | 3945  | 4212  | 5330  |
| MSTRG. 33771. 1 | noncoding | -0. 026624  | 1014  | 1179  | 6720  |
| MSTRG. 33772. 1 | noncoding | -0. 053248  | 3204  | 3321  | 4106  |
| MSTRG. 33773. 1 | noncoding | -0. 0192512 | 2223  | 2781  | 7223  |
| MSTRG. 33787. 1 | noncoding | -0. 0352256 | 387   | 603   | 1839  |
| MSTRG. 33789. 1 | noncoding | -0. 0700416 | 0     | 180   | 777   |
| MSTRG. 33792. 1 | noncoding | -0. 086016  | 474   | 537   | 696   |
| MSTRG. 33793. 1 | noncoding | -0. 036864  | 12    | 135   | 945   |
| MSTRG. 33791. 1 | coding    | 0. 178      | 27    | 540   | 883   |
| MSTRG. 33813. 2 | coding    | 0. 523      | 0     | 1050  | 6279  |
| MSTRG. 33813. 4 | coding    | 0. 443      | 0     | 1104  | 8526  |
| MSTRG. 33813. 5 | coding    | 0. 418      | 1194  | 2061  | 9570  |
| MSTRG. 33813. 6 | coding    | 0. 432      | 69    | 576   | 6574  |
| MSTRG. 33815. 1 | noncoding | -0. 0319488 | 6549  | 6759  | 7704  |
| MSTRG. 33817. 1 | noncoding | -0. 0270336 | 1617  | 1878  | 2034  |
| MSTRG. 33819. 2 | coding    | 0. 256      | 0     | 762   | 1513  |
| MSTRG. 33820. 1 | coding    | 0. 356      | 93    | 1740  | 5127  |
| MSTRG. 33820. 2 | coding    | 0. 368      | 0     | 1407  | 4650  |
| MSTRG. 33820. 4 | coding    | 0. 388      | 0     | 1479  | 4357  |
| MSTRG. 33822. 1 | coding    | 0. 192      | 0     | 273   | 432   |
| MSTRG. 33824. 1 | noncoding | -0. 12288   | 327   | 414   | 801   |
| MSTRG. 33817. 2 | coding    | 0. 654      | 0     | 2478  | 4176  |
| MSTRG. 33817. 4 | noncoding | -0. 0249856 | 1977  | 2559  | 4421  |
| MSTRG. 33804. 1 | noncoding | -0. 036864  | 192   | 318   | 637   |
| MSTRG. 33803. 1 | noncoding | -0. 0004096 | 0     | 0     | 224   |

|                 |           |             |      |      |      |
|-----------------|-----------|-------------|------|------|------|
| MSTRG. 33805. 1 | noncoding | -0. 0319488 | 75   | 132  | 323  |
| MSTRG. 33806. 1 | noncoding | -0. 0299008 | 60   | 117  | 366  |
| MSTRG. 33806. 2 | noncoding | -0. 090112  | 282  | 351  | 505  |
| MSTRG. 33809. 1 | noncoding | -0. 200704  | 237  | 306  | 462  |
| MSTRG. 33810. 1 | noncoding | -0. 2048    | 24   | 48   | 1288 |
| MSTRG. 33811. 1 | noncoding | -0. 114688  | 678  | 723  | 1104 |
| MSTRG. 33812. 1 | noncoding | -0. 0200704 | 456  | 579  | 807  |
| MSTRG. 33812. 2 | noncoding | -0. 016384  | 66   | 192  | 412  |
| MSTRG. 33846. 1 | noncoding | -0. 0884736 | 1572 | 2862 | 5744 |
| MSTRG. 33829. 1 | noncoding | -0. 0073728 | 1119 | 1308 | 2136 |
| MSTRG. 33831. 1 | noncoding | -0. 055296  | 4530 | 5436 | 5593 |
| MSTRG. 33831. 2 | noncoding | -0. 0360448 | 2646 | 3819 | 3972 |
| MSTRG. 33831. 3 | noncoding | -0. 049152  | 1071 | 2067 | 2221 |
| MSTRG. 33831. 4 | noncoding | -0. 0507904 | 792  | 1437 | 1592 |
| MSTRG. 33832. 1 | noncoding | -0. 067584  | 669  | 2085 | 2571 |
| MSTRG. 33832. 2 | noncoding | -0. 067584  | 150  | 1566 | 2761 |
| MSTRG. 33838. 1 | noncoding | -0. 129024  | 0    | 72   | 336  |
| MSTRG. 33839. 1 | noncoding | -0. 004096  | 138  | 273  | 429  |
| MSTRG. 33839. 2 | noncoding | -0. 024576  | 123  | 210  | 364  |
| MSTRG. 33841. 1 | noncoding | -0. 0176128 | 2346 | 2790 | 2961 |
| MSTRG. 33843. 1 | noncoding | -0. 114688  | 2265 | 2355 | 4023 |
| MSTRG. 33851. 1 | noncoding | -0. 0344064 | 6    | 198  | 405  |
| MSTRG. 33852. 1 | noncoding | -0. 024576  | 168  | 519  | 1050 |
| MSTRG. 33858. 1 | noncoding | -0. 012288  | 174  | 219  | 642  |
| MSTRG. 33860. 1 | noncoding | -0. 0057344 | 72   | 606  | 1097 |
| MSTRG. 33861. 1 | noncoding | -0. 0237568 | 951  | 1146 | 1783 |
| MSTRG. 33863. 1 | noncoding | -0. 018432  | 405  | 552  | 890  |
| MSTRG. 33865. 1 | noncoding | -0. 0077824 | 69   | 408  | 635  |
| MSTRG. 33868. 1 | noncoding | -0. 032768  | 1746 | 2574 | 8432 |
| MSTRG. 33868. 2 | noncoding | -0. 0557056 | 759  | 1179 | 5151 |
| MSTRG. 33869. 1 | noncoding | -0. 192512  | 102  | 147  | 301  |
| MSTRG. 33869. 2 | noncoding | -0. 192512  | 81   | 126  | 281  |
| MSTRG. 33875. 1 | noncoding | -0. 1040384 | 1806 | 2643 | 3793 |
| MSTRG. 33875. 2 | noncoding | -0. 0954368 | 1806 | 2415 | 5331 |
| MSTRG. 33875. 4 | coding    | 0. 272      | 1053 | 1809 | 2959 |
| MSTRG. 33875. 6 | noncoding | -0. 0360448 | 162  | 1035 | 3427 |
| MSTRG. 33874. 1 | noncoding | -0. 0483328 | 0    | 180  | 334  |
| MSTRG. 33879. 1 | noncoding | -0. 0032768 | 957  | 1101 | 1291 |
| MSTRG. 33882. 1 | coding    | 0. 019      | 438  | 1461 | 2586 |
| MSTRG. 33883. 1 | noncoding | -0. 016384  | 0    | 60   | 336  |
| MSTRG. 33886. 1 | noncoding | -0. 004096  | 297  | 402  | 1217 |
| MSTRG. 33880. 1 | noncoding | -0. 0176128 | 504  | 852  | 1008 |
| MSTRG. 33881. 1 | noncoding | -0. 0004096 | 81   | 225  | 410  |
| MSTRG. 33896. 2 | coding    | 0. 239      | 246  | 744  | 5352 |
| MSTRG. 33896. 3 | coding    | 0. 187      | 2610 | 3060 | 6517 |
| MSTRG. 33896. 1 | coding    | 0. 239      | 363  | 861  | 5839 |
| MSTRG. 33896. 4 | coding    | 0. 239      | 483  | 981  | 3857 |
| MSTRG. 33896. 5 | coding    | 0. 239      | 456  | 954  | 3330 |
| MSTRG. 33896. 6 | coding    | 0. 183      | 2328 | 2805 | 3358 |
| MSTRG. 33894. 2 | noncoding | -0. 0118784 | 585  | 762  | 1032 |
| MSTRG. 33898. 1 | noncoding | -0. 12288   | 552  | 603  | 759  |
| MSTRG. 33898. 2 | noncoding | -0. 12288   | 552  | 603  | 759  |
| MSTRG. 33898. 3 | noncoding | -0. 03072   | 1758 | 1917 | 2105 |
| MSTRG. 33898. 4 | noncoding | -0. 114688  | 177  | 216  | 371  |

|                  |           |             |       |       |       |
|------------------|-----------|-------------|-------|-------|-------|
| MSTRG. 33898. 5  | noncoding | -0. 0425984 | 558   | 624   | 923   |
| MSTRG. 33898. 6  | noncoding | -0. 0712704 | 168   | 192   | 871   |
| MSTRG. 33899. 1  | noncoding | -0. 03072   | 420   | 579   | 1504  |
| MSTRG. 33899. 2  | noncoding | -0. 036864  | 441   | 528   | 2090  |
| MSTRG. 33899. 3  | noncoding | -0. 036864  | 420   | 507   | 2091  |
| MSTRG. 33899. 4  | noncoding | -0. 036864  | 420   | 507   | 2091  |
| MSTRG. 33898. 7  | noncoding | -0. 0425984 | 90    | 156   | 414   |
| MSTRG. 33901. 1  | noncoding | -0. 0221184 | 0     | 57    | 839   |
| MSTRG. 33901. 2  | noncoding | -0. 0380928 | 0     | 21    | 804   |
| MSTRG. 33901. 3  | noncoding | -0. 073728  | 666   | 723   | 1772  |
| MSTRG. 33901. 4  | noncoding | -0. 0237568 | 348   | 501   | 1373  |
| MSTRG. 33901. 5  | coding    | 0. 171      | 162   | 264   | 832   |
| MSTRG. 33901. 6  | noncoding | -0. 069632  | 141   | 198   | 368   |
| MSTRG. 33901. 7  | noncoding | -0. 0004096 | 0     | 0     | 201   |
| MSTRG. 33901. 8  | noncoding | -0. 024576  | 48    | 180   | 804   |
| MSTRG. 33901. 9  | noncoding | -0. 077824  | 165   | 246   | 482   |
| MSTRG. 33903. 1  | coding    | 0. 368      | 330   | 1302  | 2170  |
| MSTRG. 33910. 1  | noncoding | -0. 09216   | 0     | 87    | 244   |
| MSTRG. 33910. 2  | noncoding | -0. 0106496 | 42    | 168   | 322   |
| MSTRG. 33914. 2  | coding    | 0. 369      | 93    | 1083  | 2269  |
| MSTRG. 33914. 1  | coding    | 0. 37       | 108   | 1122  | 2309  |
| MSTRG. 33914. 3  | coding    | 0. 386      | 0     | 984   | 1692  |
| MSTRG. 33917. 1  | noncoding | -0. 11264   | 0     | 162   | 319   |
| MSTRG. 33911. 1  | noncoding | -0. 012288  | 9     | 120   | 276   |
| MSTRG. 33920. 2  | noncoding | -0. 036864  | 1980  | 2106  | 3013  |
| MSTRG. 33920. 3  | noncoding | -0. 036864  | 1188  | 1314  | 2200  |
| MSTRG. 33921. 2  | noncoding | -0. 0139264 | 1287  | 1566  | 1720  |
| MSTRG. 33921. 3  | noncoding | -0. 002048  | 3294  | 3438  | 3594  |
| MSTRG. 33922. 1  | noncoding | -0. 016384  | 402   | 522   | 719   |
| MSTRG. 33922. 2  | noncoding | -0. 049152  | 195   | 276   | 432   |
| MSTRG. 33949. 1  | noncoding | -0. 012288  | 21    | 66    | 449   |
| MSTRG. 33949. 2  | noncoding | -0. 520192  | 189   | 210   | 363   |
| MSTRG. 33949. 3  | noncoding | -0. 08192   | 390   | 453   | 609   |
| MSTRG. 33950. 2  | noncoding | -0. 094208  | 474   | 777   | 4605  |
| MSTRG. 33950. 5  | noncoding | -0. 026624  | 1437  | 1980  | 5598  |
| MSTRG. 33950. 6  | noncoding | -0. 0425984 | 4845  | 5385  | 5540  |
| MSTRG. 33950. 7  | coding    | 0. 125      | 429   | 1095  | 4713  |
| MSTRG. 33950. 12 | noncoding | -0. 008192  | 849   | 1032  | 1186  |
| MSTRG. 33950. 10 | noncoding | -0. 008192  | 3480  | 3666  | 3821  |
| MSTRG. 33950. 13 | noncoding | -0. 0991232 | 408   | 783   | 12321 |
| MSTRG. 33950. 14 | coding    | 0. 147      | 408   | 1170  | 12470 |
| MSTRG. 33950. 9  | coding    | 0. 253      | 408   | 879   | 12387 |
| MSTRG. 33950. 11 | noncoding | -0. 0581632 | 456   | 654   | 2288  |
| MSTRG. 33950. 15 | noncoding | -0. 0180224 | 10179 | 10347 | 15199 |
| MSTRG. 33950. 17 | noncoding | -0. 0045056 | 4410  | 4554  | 5081  |
| MSTRG. 33950. 19 | noncoding | -0. 028672  | 81    | 132   | 868   |
| MSTRG. 33953. 1  | noncoding | -0. 016384  | 96    | 228   | 1731  |
| MSTRG. 33931. 1  | noncoding | -0. 0487424 | 2634  | 2814  | 4364  |
| MSTRG. 33932. 1  | noncoding | -0. 032768  | 42    | 78    | 373   |
| MSTRG. 33931. 2  | noncoding | -0. 004096  | 120   | 258   | 1808  |
| MSTRG. 33933. 1  | noncoding | -0. 0126976 | 201   | 351   | 778   |
| MSTRG. 33934. 1  | noncoding | -0. 024576  | 63    | 195   | 538   |
| MSTRG. 33928. 1  | noncoding | -0. 0147456 | 48    | 111   | 331   |
| MSTRG. 33929. 1  | noncoding | -0. 0012288 | 189   | 474   | 2631  |

|                  |           |             |      |      |       |
|------------------|-----------|-------------|------|------|-------|
| MSTRG. 33935. 1  | noncoding | -0. 0442368 | 0    | 165  | 434   |
| MSTRG. 33941. 2  | noncoding | -0. 073728  | 933  | 1023 | 1829  |
| MSTRG. 33944. 1  | noncoding | -0. 0528384 | 279  | 459  | 909   |
| MSTRG. 33946. 1  | noncoding | -0. 028672  | 330  | 441  | 596   |
| MSTRG. 33946. 2  | noncoding | -0. 028672  | 330  | 441  | 596   |
| MSTRG. 33946. 3  | noncoding | -0. 090112  | 72   | 111  | 360   |
| MSTRG. 33947. 1  | noncoding | -0. 0229376 | 0    | 150  | 305   |
| MSTRG. 33960. 1  | noncoding | -0. 012288  | 3315 | 3363 | 4133  |
| MSTRG. 33960. 2  | noncoding | -0. 0258048 | 258  | 576  | 9154  |
| MSTRG. 33960. 7  | noncoding | -0. 0258048 | 1083 | 1401 | 1725  |
| MSTRG. 33960. 8  | noncoding | -0. 0258048 | 570  | 888  | 1213  |
| MSTRG. 33960. 9  | noncoding | -0. 0258048 | 468  | 786  | 1108  |
| MSTRG. 33960. 10 | noncoding | -0. 0335872 | 423  | 609  | 1301  |
| MSTRG. 33960. 11 | noncoding | -0. 0372736 | 423  | 612  | 1304  |
| MSTRG. 33963. 1  | noncoding | -0. 0311296 | 150  | 255  | 422   |
| MSTRG. 33964. 1  | noncoding | -0. 006144  | 171  | 279  | 1989  |
| MSTRG. 33965. 1  | noncoding | -0. 0036864 | 834  | 903  | 1194  |
| MSTRG. 33965. 2  | noncoding | -0. 0036864 | 441  | 510  | 775   |
| MSTRG. 33966. 1  | noncoding | -0. 024576  | 15   | 48   | 278   |
| MSTRG. 33962. 1  | noncoding | -0. 0237568 | 75   | 156  | 311   |
| MSTRG. 33962. 2  | noncoding | -0. 0180224 | 75   | 156  | 309   |
| MSTRG. 33967. 1  | noncoding | -0. 0004096 | 24   | 114  | 268   |
| MSTRG. 33985. 4  | coding    | 0. 153      | 516  | 1173 | 9208  |
| MSTRG. 33985. 7  | coding    | 0. 138      | 516  | 1074 | 16711 |
| MSTRG. 33985. 10 | coding    | 0. 153      | 498  | 1155 | 5833  |
| MSTRG. 33985. 9  | coding    | 0. 158      | 498  | 1002 | 2634  |
| MSTRG. 33985. 11 | coding    | 0. 176      | 405  | 876  | 16669 |
| MSTRG. 33979. 1  | noncoding | -0. 0180224 | 0    | 513  | 846   |
| MSTRG. 33986. 1  | coding    | 0. 065      | 87   | 303  | 1296  |
| MSTRG. 33986. 2  | noncoding | -0. 0237568 | 39   | 192  | 625   |
| MSTRG. 33986. 3  | noncoding | -0. 077824  | 213  | 288  | 451   |
| MSTRG. 33986. 4  | coding    | 0. 058      | 285  | 480  | 700   |
| MSTRG. 33987. 1  | noncoding | -0. 01024   | 261  | 363  | 696   |
| MSTRG. 33986. 5  | coding    | 0. 058      | 285  | 480  | 665   |
| MSTRG. 33992. 1  | noncoding | -0. 0823296 | 0    | 42   | 482   |
| MSTRG. 33993. 1  | noncoding | -0. 077824  | 432  | 507  | 874   |
| MSTRG. 33993. 2  | noncoding | -0. 016384  | 216  | 327  | 875   |
| MSTRG. 33998. 1  | noncoding | -0. 0606208 | 0    | 204  | 359   |
| MSTRG. 33999. 1  | noncoding | -0. 0475136 | 24   | 93   | 249   |
| MSTRG. 34000. 2  | noncoding | -0. 0442368 | 861  | 1023 | 2935  |
| MSTRG. 34000. 3  | noncoding | -0. 0512    | 1071 | 1440 | 5338  |
| MSTRG. 34000. 1  | noncoding | -0. 036864  | 948  | 1158 | 2413  |
| MSTRG. 34000. 4  | noncoding | -0. 0331776 | 2157 | 2709 | 6316  |
| MSTRG. 34000. 5  | noncoding | -0. 0331776 | 2157 | 2709 | 6316  |
| MSTRG. 34000. 6  | noncoding | -0. 0512    | 3078 | 3447 | 7346  |
| MSTRG. 34016. 1  | noncoding | -0. 0155648 | 0    | 33   | 638   |
| MSTRG. 34016. 2  | noncoding | -0. 0180224 | 0    | 27   | 524   |
| MSTRG. 34016. 4  | noncoding | -0. 0495616 | 0    | 9    | 502   |
| MSTRG. 34016. 5  | noncoding | -0. 0339968 | 780  | 1365 | 1640  |
| MSTRG. 34016. 6  | noncoding | -0. 0339968 | 780  | 1365 | 1640  |
| MSTRG. 34016. 3  | noncoding | -0. 118784  | 990  | 1044 | 1666  |
| MSTRG. 34016. 7  | noncoding | -0. 0503808 | 0    | 6    | 504   |
| MSTRG. 34016. 8  | noncoding | -0. 0610304 | 219  | 321  | 606   |
| MSTRG. 34016. 9  | noncoding | -0. 1052672 | 0    | 321  | 732   |

|                  |           |             |      |      |      |
|------------------|-----------|-------------|------|------|------|
| MSTRG. 34016. 10 | noncoding | -0. 151552  | 1098 | 1146 | 1301 |
| MSTRG. 34016. 11 | noncoding | -0. 0425984 | 561  | 627  | 936  |
| MSTRG. 34016. 12 | noncoding | -0. 0425984 | 549  | 615  | 924  |
| MSTRG. 34016. 13 | noncoding | -0. 0425984 | 54   | 120  | 431  |
| MSTRG. 34016. 15 | noncoding | -0. 036864  | 912  | 999  | 1588 |
| MSTRG. 34016. 14 | noncoding | -0. 024576  | 915  | 1008 | 1599 |
| MSTRG. 34016. 16 | noncoding | -0. 036864  | 903  | 990  | 1580 |
| MSTRG. 34016. 17 | noncoding | -0. 036864  | 438  | 525  | 1108 |
| MSTRG. 34016. 18 | noncoding | -0. 036864  | 420  | 507  | 1097 |
| MSTRG. 34012. 1  | noncoding | -0. 0417792 | 225  | 588  | 744  |
| MSTRG. 34013. 1  | noncoding | -0. 0589824 | 0    | 162  | 350  |
| MSTRG. 34017. 1  | noncoding | -0. 004096  | 48   | 171  | 867  |
| MSTRG. 34017. 3  | noncoding | -0. 06144   | 66   | 153  | 308  |
| MSTRG. 34017. 2  | noncoding | -0. 0339968 | 0    | 192  | 1438 |
| MSTRG. 34017. 4  | noncoding | -0. 0528384 | 264  | 444  | 611  |
| MSTRG. 34017. 5  | noncoding | -0. 0339968 | 0    | 192  | 1020 |
| MSTRG. 34018. 1  | noncoding | -0. 016384  | 144  | 291  | 556  |
| MSTRG. 34026. 2  | noncoding | -0. 0208896 | 108  | 249  | 402  |
| MSTRG. 34028. 1  | coding    | 0. 111      | 0    | 252  | 476  |
| MSTRG. 34035. 1  | coding    | 0. 136      | 0    | 795  | 952  |
| MSTRG. 34037. 1  | noncoding | -0. 114688  | 0    | 57   | 213  |
| MSTRG. 34038. 1  | noncoding | -0. 0630784 | 0    | 237  | 392  |
| MSTRG. 34046. 1  | noncoding | -0. 1122304 | 0    | 354  | 1948 |
| MSTRG. 34046. 2  | noncoding | -0. 110592  | 0    | 363  | 2047 |
| MSTRG. 34046. 3  | noncoding | -0. 1122304 | 0    | 354  | 1724 |
| MSTRG. 34046. 4  | noncoding | -0. 106496  | 0    | 321  | 5800 |
| MSTRG. 34046. 5  | noncoding | -0. 1081344 | 0    | 324  | 2116 |
| MSTRG. 34046. 6  | noncoding | -0. 110592  | 0    | 351  | 6142 |
| MSTRG. 34047. 2  | noncoding | -0. 053248  | 195  | 303  | 456  |
| MSTRG. 34052. 1  | noncoding | -0. 0106496 | 366  | 624  | 1149 |
| MSTRG. 34053. 1  | noncoding | -0. 0712704 | 207  | 231  | 419  |
| MSTRG. 34053. 2  | noncoding | -0. 0712704 | 207  | 231  | 397  |
| MSTRG. 34055. 1  | coding    | 0. 147      | 123  | 612  | 843  |
| MSTRG. 34056. 2  | noncoding | -0. 0516096 | 1725 | 2079 | 2800 |
| MSTRG. 34066. 1  | noncoding | -0. 0192512 | 501  | 651  | 4438 |
| MSTRG. 34072. 1  | coding    | 0. 23       | 27   | 153  | 323  |
| MSTRG. 34072. 2  | noncoding | -0. 0380928 | 0    | 213  | 368  |
| MSTRG. 34072. 3  | noncoding | -0. 0262144 | 0    | 168  | 322  |
| MSTRG. 34072. 4  | noncoding | -0. 0282624 | 0    | 168  | 322  |
| MSTRG. 34072. 5  | noncoding | -0. 0974848 | 0    | 120  | 276  |
| MSTRG. 34088. 1  | noncoding | -0. 0004096 | 0    | 0    | 497  |
| MSTRG. 34090. 1  | noncoding | -0. 0004096 | 0    | 0    | 295  |
| MSTRG. 34088. 2  | noncoding | -0. 1114112 | 39   | 45   | 278  |
| MSTRG. 34084. 1  | noncoding | -0. 0004096 | 0    | 0    | 243  |
| MSTRG. 34085. 1  | noncoding | -0. 0004096 | 0    | 0    | 214  |
| MSTRG. 34093. 1  | coding    | 0. 169      | 675  | 1164 | 1485 |
| MSTRG. 34094. 1  | coding    | 0. 096      | 153  | 1137 | 1495 |
| MSTRG. 34101. 1  | noncoding | -0. 0352256 | 3    | 60   | 975  |
| MSTRG. 34097. 1  | noncoding | -0. 0004096 | 0    | 72   | 229  |
| MSTRG. 34108. 2  | coding    | 0. 218      | 0    | 1209 | 1671 |
| MSTRG. 34110. 1  | noncoding | -0. 03072   | 171  | 267  | 767  |
| MSTRG. 34110. 2  | noncoding | -0. 2048    | 12   | 48   | 593  |
| MSTRG. 34129. 1  | noncoding | -0. 028672  | 321  | 453  | 701  |
| MSTRG. 34130. 3  | noncoding | -0. 090112  | 750  | 831  | 1076 |

|                 |           |            |      |      |      |
|-----------------|-----------|------------|------|------|------|
| MSTRG. 34130.1  | noncoding | -0.090112  | 750  | 831  | 1074 |
| MSTRG. 34130.2  | noncoding | -0.090112  | 750  | 831  | 1075 |
| MSTRG. 34131.1  | noncoding | -0.090112  | 294  | 375  | 620  |
| MSTRG. 34131.2  | noncoding | -0.090112  | 192  | 273  | 519  |
| MSTRG. 34130.4  | noncoding | -0.02048   | 669  | 801  | 2247 |
| MSTRG. 34130.5  | noncoding | -0.090112  | 750  | 831  | 1076 |
| MSTRG. 34135.3  | noncoding | -0.0364544 | 0    | 255  | 411  |
| MSTRG. 34135.1  | noncoding | -0.038912  | 0    | 258  | 414  |
| MSTRG. 34135.2  | noncoding | -0.038912  | 0    | 258  | 414  |
| MSTRG. 34135.4  | noncoding | -0.034816  | 0    | 249  | 413  |
| MSTRG. 34136.1  | noncoding | -0.0569344 | 399  | 564  | 1350 |
| MSTRG. 34135.5  | noncoding | -0.0253952 | 0    | 303  | 457  |
| MSTRG. 34137.3  | noncoding | -0.0712704 | 219  | 243  | 878  |
| MSTRG. 34137.1  | noncoding | -0.0712704 | 219  | 243  | 870  |
| MSTRG. 34137.2  | noncoding | -0.0712704 | 219  | 243  | 870  |
| MSTRG. 34135.6  | noncoding | -0.0344064 | 0    | 459  | 615  |
| MSTRG. 34133.1  | noncoding | -0.012288  | 117  | 162  | 377  |
| MSTRG. 34146.1  | coding    | 0.101      | 0    | 3021 | 3239 |
| MSTRG. 34149.1  | noncoding | -0.0344064 | 5223 | 5529 | 7834 |
| MSTRG. 34152.1  | noncoding | -0.0004096 | 0    | 0    | 1043 |
| MSTRG. 34153.1  | coding    | 0.205      | 0    | 144  | 305  |
| MSTRG. 34185.7  | noncoding | -0.1196032 | 2973 | 3438 | 6469 |
| MSTRG. 34185.8  | noncoding | -0.0651264 | 123  | 780  | 1067 |
| MSTRG. 34185.10 | coding    | 0.084      | 156  | 453  | 1440 |
| MSTRG. 34185.9  | noncoding | -0.038912  | 264  | 456  | 738  |
| MSTRG. 34185.11 | noncoding | -0.0917504 | 0    | 588  | 1181 |
| MSTRG. 34185.12 | noncoding | -0.0925696 | 0    | 588  | 1115 |
| MSTRG. 34185.13 | noncoding | -0.0380928 | 111  | 303  | 617  |
| MSTRG. 34185.15 | noncoding | -0.0733184 | 2532 | 3210 | 8522 |
| MSTRG. 34185.14 | noncoding | -0.073728  | 2532 | 3162 | 3616 |
| MSTRG. 34185.16 | noncoding | -0.0483328 | 258  | 450  | 723  |
| MSTRG. 34185.17 | noncoding | -0.0733184 | 1875 | 2553 | 7866 |
| MSTRG. 34185.18 | noncoding | -0.073728  | 6939 | 7569 | 8024 |
| MSTRG. 34185.19 | noncoding | -0.043008  | 111  | 336  | 1079 |
| MSTRG. 34185.20 | noncoding | -0.1929216 | 0    | 252  | 1010 |
| MSTRG. 34185.21 | noncoding | -0.0733184 | 645  | 1323 | 1612 |
| MSTRG. 34185.22 | noncoding | -0.073728  | 2424 | 3054 | 3509 |
| MSTRG. 34185.23 | noncoding | -0.0241664 | 0    | 72   | 343  |
| MSTRG. 34154.1  | noncoding | -0.065536  | 0    | 135  | 289  |
| MSTRG. 34155.1  | noncoding | -0.053248  | 45   | 114  | 270  |
| MSTRG. 34154.2  | noncoding | -0.0602112 | 0    | 108  | 264  |
| MSTRG. 34161.2  | coding    | 0.213      | 639  | 1875 | 2453 |
| MSTRG. 34161.3  | coding    | 0.236      | 0    | 1233 | 1687 |
| MSTRG. 34159.1  | noncoding | -0.090112  | 672  | 753  | 1033 |
| MSTRG. 34164.1  | noncoding | -0.0126976 | 63   | 213  | 1507 |
| MSTRG. 34164.2  | coding    | 0.008      | 861  | 957  | 1639 |
| MSTRG. 34171.2  | coding    | 0.149      | 1260 | 2259 | 2633 |
| MSTRG. 34171.5  | coding    | 0.148      | 1272 | 2274 | 2704 |
| MSTRG. 34171.6  | coding    | 0.147      | 333  | 1326 | 2472 |
| MSTRG. 34174.1  | noncoding | -0.032768  | 0    | 99   | 253  |
| MSTRG. 34178.1  | noncoding | -0.0598016 | 0    | 228  | 673  |
| MSTRG. 34183.2  | coding    | 0.168      | 1239 | 2610 | 2766 |
| MSTRG. 34183.3  | coding    | 0.172      | 15   | 1365 | 1519 |
| MSTRG. 34183.4  | noncoding | -0.008192  | 249  | 252  | 658  |

|                 |           |             |       |       |       |
|-----------------|-----------|-------------|-------|-------|-------|
| MSTRG. 34190. 1 | coding    | 0. 143      | 72    | 3048  | 3216  |
| MSTRG. 34190. 2 | coding    | 0. 143      | 72    | 3057  | 3225  |
| MSTRG. 34190. 6 | coding    | 0. 125      | 780   | 2145  | 2437  |
| MSTRG. 34190. 9 | coding    | 0. 123      | 78    | 1125  | 2044  |
| MSTRG. 34169. 1 | noncoding | -0. 0610304 | 291   | 708   | 916   |
| MSTRG. 34196. 1 | noncoding | -0. 0475136 | 237   | 528   | 3898  |
| MSTRG. 34198. 3 | coding    | 0. 198      | 111   | 405   | 629   |
| MSTRG. 34198. 4 | coding    | 0. 187      | 90    | 363   | 587   |
| MSTRG. 34206. 1 | noncoding | -0. 098304  | 0     | 3     | 453   |
| MSTRG. 34202. 1 | noncoding | -0. 0815104 | 870   | 936   | 2175  |
| MSTRG. 34209. 1 | noncoding | -0. 004096  | 57    | 159   | 751   |
| MSTRG. 34209. 2 | noncoding | -0. 0847872 | 207   | 285   | 475   |
| MSTRG. 34210. 1 | noncoding | -0. 0139264 | 75    | 198   | 352   |
| MSTRG. 34210. 2 | noncoding | -0. 008192  | 141   | 219   | 374   |
| MSTRG. 34219. 1 | noncoding | -0. 1470464 | 0     | 30    | 283   |
| MSTRG. 34220. 1 | noncoding | -0. 077824  | 27    | 108   | 305   |
| MSTRG. 34219. 2 | noncoding | -0. 1470464 | 0     | 30    | 283   |
| MSTRG. 34220. 2 | noncoding | -0. 077824  | 18    | 99    | 294   |
| MSTRG. 34220. 3 | noncoding | -0. 04096   | 123   | 201   | 396   |
| MSTRG. 34219. 3 | noncoding | -0. 0262144 | 156   | 192   | 374   |
| MSTRG. 34225. 1 | noncoding | -0. 073728  | 474   | 552   | 730   |
| MSTRG. 34226. 1 | noncoding | -0. 024576  | 189   | 288   | 802   |
| MSTRG. 34235. 1 | noncoding | -0. 0004096 | 0     | 0     | 292   |
| MSTRG. 34238. 1 | noncoding | -0. 0606208 | 0     | 390   | 544   |
| MSTRG. 34252. 1 | noncoding | -0. 0233472 | 150   | 336   | 1253  |
| MSTRG. 34252. 2 | coding    | 0. 062      | 0     | 246   | 1161  |
| MSTRG. 34252. 3 | noncoding | -0. 0004096 | 1149  | 1335  | 1490  |
| MSTRG. 34252. 4 | noncoding | -0. 0004096 | 1149  | 1335  | 1490  |
| MSTRG. 34272. 1 | noncoding | -0. 0352256 | 12594 | 12807 | 14431 |
| MSTRG. 34272. 2 | noncoding | -0. 0352256 | 12594 | 12807 | 14677 |
| MSTRG. 34272. 4 | noncoding | -0. 0352256 | 12567 | 12780 | 15865 |
| MSTRG. 34272. 3 | noncoding | -0. 0352256 | 12594 | 12807 | 13428 |
| MSTRG. 34272. 6 | noncoding | -0. 0352256 | 12594 | 12807 | 13387 |
| MSTRG. 34272. 5 | noncoding | -0. 0352256 | 13431 | 13644 | 14223 |
| MSTRG. 34272. 7 | noncoding | -0. 0352256 | 10956 | 11169 | 11741 |
| MSTRG. 34272. 8 | noncoding | -0. 0352256 | 12582 | 12795 | 13359 |
| MSTRG. 34272. 9 | noncoding | -0. 0352256 | 12678 | 12891 | 13285 |
| MSTRG. 34293. 1 | noncoding | -0. 0004096 | 0     | 0     | 1627  |
| MSTRG. 34294. 1 | noncoding | -0. 0004096 | 342   | 342   | 776   |
| MSTRG. 34294. 2 | noncoding | -0. 073728  | 258   | 291   | 651   |
| MSTRG. 34295. 1 | noncoding | -0. 004096  | 6180  | 6291  | 9109  |
| MSTRG. 34295. 2 | noncoding | -0. 0253952 | 3177  | 3255  | 4015  |
| MSTRG. 34295. 4 | noncoding | -0. 094208  | 1266  | 1308  | 1465  |
| MSTRG. 34295. 3 | noncoding | -0. 063488  | 549   | 609   | 1549  |
| MSTRG. 34295. 5 | noncoding | -0. 147456  | 1383  | 1446  | 1600  |
| MSTRG. 34294. 3 | coding    | 0. 108      | 3504  | 3972  | 21921 |
| MSTRG. 34294. 4 | noncoding | -0. 0487424 | 16149 | 16329 | 17825 |
| MSTRG. 34294. 6 | noncoding | -0. 0036864 | 2295  | 2511  | 15603 |
| MSTRG. 34294. 5 | noncoding | -0. 0036864 | 2295  | 2511  | 15556 |
| MSTRG. 34295. 6 | noncoding | -0. 0159744 | 1368  | 1482  | 4353  |
| MSTRG. 34294. 8 | noncoding | -0. 016384  | 618   | 786   | 1131  |
| MSTRG. 34294. 7 | coding    | 0. 078      | 12876 | 13182 | 14619 |
| MSTRG. 34294. 9 | noncoding | -0. 024576  | 19203 | 19386 | 23293 |
| MSTRG. 34295. 7 | noncoding | -0. 1155072 | 141   | 153   | 357   |

|                  |           |             |       |       |       |
|------------------|-----------|-------------|-------|-------|-------|
| MSTRG. 34294. 10 | coding    | 0. 078      | 7236  | 7542  | 9109  |
| MSTRG. 34294. 11 | noncoding | -0. 004096  | 858   | 996   | 1574  |
| MSTRG. 34298. 1  | noncoding | -0. 006144  | 36    | 45    | 341   |
| MSTRG. 34298. 2  | noncoding | -0. 006144  | 36    | 45    | 337   |
| MSTRG. 34299. 1  | noncoding | -0. 077824  | 66    | 141   | 412   |
| MSTRG. 34282. 1  | noncoding | -0. 0016384 | 48    | 174   | 1219  |
| MSTRG. 34283. 1  | noncoding | -0. 016384  | 0     | 54    | 211   |
| MSTRG. 34284. 1  | noncoding | -0. 008192  | 171   | 303   | 522   |
| MSTRG. 34287. 1  | noncoding | -0. 0385024 | 18    | 78    | 389   |
| MSTRG. 34300. 1  | noncoding | -0. 004096  | 93    | 213   | 368   |
| MSTRG. 34302. 1  | noncoding | -0. 004096  | 378   | 525   | 681   |
| MSTRG. 34303. 1  | noncoding | -0. 08192   | 225   | 273   | 430   |
| MSTRG. 34314. 1  | noncoding | -0. 008192  | 180   | 219   | 387   |
| MSTRG. 34314. 3  | coding    | 0. 058      | 264   | 459   | 3225  |
| MSTRG. 34314. 4  | noncoding | -0. 0413696 | 4101  | 4311  | 4987  |
| MSTRG. 34314. 2  | noncoding | -0. 0413696 | 4101  | 4311  | 5283  |
| MSTRG. 34315. 1  | coding    | 0. 29       | 30495 | 31074 | 37600 |
| MSTRG. 34315. 2  | noncoding | -0. 1101824 | 10557 | 11265 | 11420 |
| MSTRG. 34315. 3  | noncoding | -0. 1404928 | 2337  | 3618  | 3774  |
| MSTRG. 34315. 4  | noncoding | -0. 135168  | 10020 | 11235 | 11534 |
| MSTRG. 34317. 2  | noncoding | -0. 1150976 | 5343  | 6174  | 7198  |
| MSTRG. 34317. 3  | noncoding | -0. 0684032 | 594   | 1125  | 3456  |
| MSTRG. 34315. 5  | noncoding | -0. 0794624 | 2475  | 3246  | 17952 |
| MSTRG. 34315. 6  | noncoding | -0. 0221184 | 3     | 345   | 1939  |
| MSTRG. 34315. 7  | noncoding | -0. 0106496 | 1992  | 2268  | 5982  |
| MSTRG. 34315. 8  | noncoding | -0. 0782336 | 306   | 993   | 2503  |
| MSTRG. 34315. 10 | noncoding | -0. 0892928 | 0     | 588   | 2078  |
| MSTRG. 34315. 11 | noncoding | -0. 0794624 | 4893  | 5664  | 7155  |
| MSTRG. 34315. 9  | noncoding | -0. 0794624 | 2349  | 3120  | 4610  |
| MSTRG. 34304. 1  | noncoding | -0. 0004096 | 0     | 0     | 202   |
| MSTRG. 34305. 1  | noncoding | -0. 012288  | 81    | 126   | 550   |
| MSTRG. 34306. 2  | noncoding | -0. 0974848 | 648   | 693   | 857   |
| MSTRG. 34306. 1  | noncoding | -0. 0974848 | 234   | 279   | 442   |
| MSTRG. 34307. 1  | noncoding | -0. 0131072 | 33    | 75    | 450   |
| MSTRG. 34307. 2  | noncoding | -0. 0131072 | 15    | 57    | 479   |
| MSTRG. 34308. 1  | noncoding | -0. 0974848 | 327   | 372   | 591   |
| MSTRG. 34321. 1  | coding    | 0. 085      | 1083  | 1512  | 1929  |
| MSTRG. 34328. 1  | noncoding | -0. 0008192 | 696   | 795   | 951   |
| MSTRG. 34330. 1  | noncoding | -0. 0335872 | 0     | 30    | 336   |
| MSTRG. 34327. 1  | coding    | 0. 316      | 0     | 339   | 582   |
| MSTRG. 34334. 2  | coding    | 0. 331      | 114   | 372   | 784   |
| MSTRG. 34346. 1  | noncoding | -0. 0442368 | 390   | 552   | 767   |
| MSTRG. 34346. 2  | noncoding | -0. 0442368 | 864   | 1026  | 1228  |
| MSTRG. 34346. 3  | noncoding | -0. 0712704 | 225   | 249   | 414   |
| MSTRG. 34346. 4  | noncoding | -0. 0712704 | 225   | 249   | 414   |
| MSTRG. 34342. 1  | noncoding | -0. 065536  | 117   | 141   | 313   |
| MSTRG. 34342. 2  | noncoding | -0. 065536  | 117   | 141   | 313   |
| MSTRG. 34351. 1  | coding    | 0. 065      | 165   | 381   | 1515  |
| MSTRG. 34351. 3  | noncoding | -0. 077824  | 408   | 483   | 803   |
| MSTRG. 34351. 2  | noncoding | -0. 01024   | 372   | 597   | 754   |
| MSTRG. 34351. 4  | coding    | 0. 065      | 207   | 423   | 1848  |
| MSTRG. 34351. 5  | noncoding | -0. 01024   | 447   | 672   | 828   |
| MSTRG. 34351. 6  | noncoding | -0. 0499712 | 168   | 171   | 325   |
| MSTRG. 34351. 7  | noncoding | -0. 0004096 | 0     | 0     | 248   |



|                  |           |             |      |       |       |
|------------------|-----------|-------------|------|-------|-------|
| MSTRG. 34351. 8  | noncoding | -0. 0118784 | 102  | 129   | 283   |
| MSTRG. 34349. 1  | noncoding | -0. 06144   | 18   | 93    | 384   |
| MSTRG. 34352. 1  | noncoding | -0. 0311296 | 555  | 921   | 2105  |
| MSTRG. 34352. 2  | noncoding | -0. 036864  | 0    | 249   | 548   |
| MSTRG. 34369. 1  | coding    | 0. 168      | 8511 | 10032 | 11802 |
| MSTRG. 34369. 2  | coding    | 0. 24       | 7554 | 8079  | 8795  |
| MSTRG. 34369. 3  | coding    | 0. 246      | 8451 | 8946  | 12369 |
| MSTRG. 34369. 4  | coding    | 0. 24       | 8352 | 8877  | 9595  |
| MSTRG. 34369. 5  | coding    | 0. 246      | 6939 | 7434  | 8894  |
| MSTRG. 34369. 7  | coding    | 0. 228      | 1422 | 1977  | 2694  |
| MSTRG. 34369. 8  | coding    | 0. 145      | 4374 | 7008  | 7818  |
| MSTRG. 34369. 9  | coding    | 0. 224      | 51   | 516   | 5634  |
| MSTRG. 34369. 10 | coding    | 0. 135      | 45   | 510   | 1877  |
| MSTRG. 34369. 11 | coding    | 0. 15       | 249  | 978   | 1749  |
| MSTRG. 34356. 1  | noncoding | -0. 0024576 | 432  | 513   | 782   |
| MSTRG. 34356. 2  | noncoding | -0. 008192  | 0    | 60    | 433   |
| MSTRG. 34357. 1  | noncoding | -0. 0077824 | 201  | 447   | 836   |
| MSTRG. 34355. 1  | coding    | 0. 307      | 0    | 273   | 1118  |
| MSTRG. 34363. 2  | coding    | 0. 439      | 0    | 327   | 1640  |
| MSTRG. 34363. 3  | coding    | 0. 446      | 150  | 1899  | 2409  |
| MSTRG. 34365. 2  | coding    | 0. 166      | 0    | 612   | 3968  |
| MSTRG. 34365. 3  | noncoding | -0. 0413696 | 0    | 297   | 4058  |
| MSTRG. 34365. 4  | noncoding | -0. 0004096 | 0    | 114   | 267   |
| MSTRG. 34361. 1  | noncoding | -0. 0712704 | 66   | 297   | 470   |
| MSTRG. 34373. 1  | noncoding | -0. 0196608 | 0    | 321   | 706   |
| MSTRG. 34373. 2  | noncoding | -0. 0221184 | 0    | 423   | 808   |
| MSTRG. 34373. 3  | noncoding | -0. 0196608 | 0    | 321   | 706   |
| MSTRG. 34374. 1  | noncoding | -0. 024576  | 294  | 351   | 506   |
| MSTRG. 34374. 2  | noncoding | -0. 04096   | 60   | 87    | 445   |
| MSTRG. 34374. 3  | noncoding | -0. 0004096 | 36   | 36    | 354   |
| MSTRG. 34375. 1  | noncoding | -0. 0712704 | 618  | 642   | 1077  |
| MSTRG. 34375. 2  | noncoding | -0. 0712704 | 621  | 645   | 1079  |
| MSTRG. 34373. 4  | noncoding | -0. 0004096 | 501  | 639   | 1025  |
| MSTRG. 34373. 5  | noncoding | -0. 0004096 | 501  | 639   | 1025  |
| MSTRG. 34376. 5  | noncoding | -0. 0712704 | 360  | 384   | 1065  |
| MSTRG. 34376. 2  | noncoding | -0. 0712704 | 381  | 405   | 571   |
| MSTRG. 34376. 4  | noncoding | -0. 0712704 | 381  | 405   | 1051  |
| MSTRG. 34376. 3  | noncoding | -0. 0712704 | 381  | 405   | 1076  |
| MSTRG. 34376. 6  | noncoding | -0. 0565248 | 1356 | 1512  | 3404  |
| MSTRG. 34376. 7  | noncoding | -0. 0712704 | 381  | 405   | 1076  |
| MSTRG. 34376. 1  | noncoding | -0. 02048   | 870  | 969   | 1124  |
| MSTRG. 34383. 1  | noncoding | -0. 106496  | 528  | 585   | 945   |
| MSTRG. 34383. 2  | noncoding | -0. 106496  | 594  | 651   | 877   |
| MSTRG. 34383. 3  | noncoding | -0. 106496  | 144  | 201   | 422   |
| MSTRG. 34384. 1  | noncoding | -0. 12288   | 162  | 237   | 393   |
| MSTRG. 34389. 1  | noncoding | -0. 0004096 | 195  | 279   | 435   |
| MSTRG. 34390. 1  | noncoding | -0. 0401408 | 27   | 255   | 1138  |
| MSTRG. 34391. 1  | noncoding | -0. 0262144 | 96   | 183   | 384   |
| MSTRG. 34393. 1  | noncoding | -0. 0176128 | 255  | 414   | 6576  |
| MSTRG. 34395. 2  | coding    | 0. 045      | 429  | 870   | 1394  |
| MSTRG. 34394. 1  | coding    | 0. 123      | 0    | 564   | 1015  |
| MSTRG. 34394. 3  | coding    | 0. 123      | 0    | 564   | 1819  |
| MSTRG. 34400. 1  | noncoding | -0. 012288  | 459  | 612   | 769   |
| MSTRG. 34401. 2  | noncoding | -0. 0004096 | 0    | 0     | 263   |

|                  |           |             |      |      |      |
|------------------|-----------|-------------|------|------|------|
| MSTRG. 34401. 1  | noncoding | -0. 0004096 | 0    | 0    | 254  |
| MSTRG. 34402. 1  | noncoding | -0. 032768  | 183  | 201  | 357  |
| MSTRG. 34402. 2  | noncoding | -0. 032768  | 183  | 201  | 357  |
| MSTRG. 34401. 3  | noncoding | -0. 1273856 | 0    | 42   | 599  |
| MSTRG. 34402. 3  | noncoding | -0. 032768  | 291  | 309  | 466  |
| MSTRG. 34400. 2  | noncoding | -0. 012288  | 837  | 990  | 1146 |
| MSTRG. 34411. 1  | noncoding | -0. 004096  | 15   | 123  | 459  |
| MSTRG. 34414. 1  | noncoding | -0. 0892928 | 1866 | 3195 | 7020 |
| MSTRG. 34414. 2  | noncoding | -0. 0892928 | 318  | 1608 | 4926 |
| MSTRG. 34414. 3  | noncoding | -0. 0892928 | 318  | 1602 | 4923 |
| MSTRG. 34416. 1  | noncoding | -0. 190464  | 0    | 366  | 600  |
| MSTRG. 34435. 10 | coding    | 0. 184      | 0    | 1479 | 2830 |
| MSTRG. 34435. 7  | coding    | 0. 163      | 0    | 1149 | 2816 |
| MSTRG. 34435. 8  | coding    | 0. 172      | 0    | 1419 | 2770 |
| MSTRG. 34435. 9  | coding    | 0. 184      | 0    | 1479 | 2830 |
| MSTRG. 34435. 2  | coding    | 0. 184      | 3    | 1482 | 2833 |
| MSTRG. 34418. 1  | noncoding | -0. 0004096 | 198  | 318  | 475  |
| MSTRG. 34420. 1  | noncoding | -0. 049152  | 99   | 192  | 347  |
| MSTRG. 34421. 1  | noncoding | -0. 0405504 | 0    | 108  | 261  |
| MSTRG. 34422. 1  | noncoding | -0. 0151552 | 0    | 426  | 582  |
| MSTRG. 34427. 1  | noncoding | -0. 0872448 | 54   | 1251 | 1510 |
| MSTRG. 34427. 2  | noncoding | -0. 0806912 | 54   | 1344 | 1936 |
| MSTRG. 34427. 3  | noncoding | -0. 0802816 | 54   | 1338 | 1921 |
| MSTRG. 34429. 2  | noncoding | -0. 098304  | 93   | 111  | 267  |
| MSTRG. 34429. 1  | noncoding | -0. 0180224 | 186  | 336  | 622  |
| MSTRG. 34438. 1  | noncoding | -0. 0004096 | 132  | 132  | 286  |
| MSTRG. 34439. 1  | noncoding | -0. 098304  | 189  | 207  | 362  |
| MSTRG. 34449. 1  | noncoding | -0. 016384  | 138  | 171  | 325  |
| MSTRG. 34449. 2  | noncoding | -0. 0196608 | 210  | 405  | 1991 |
| MSTRG. 34449. 3  | coding    | 0. 059      | 753  | 930  | 1232 |
| MSTRG. 34449. 4  | noncoding | -0. 077824  | 348  | 423  | 819  |
| MSTRG. 34449. 5  | noncoding | -0. 0196608 | 210  | 405  | 2208 |
| MSTRG. 34449. 6  | noncoding | -0. 0196608 | 201  | 396  | 2202 |
| MSTRG. 34449. 7  | noncoding | -0. 0196608 | 201  | 396  | 2199 |
| MSTRG. 34449. 9  | noncoding | -0. 0196608 | 195  | 390  | 2595 |
| MSTRG. 34449. 8  | noncoding | -0. 0196608 | 201  | 396  | 2603 |
| MSTRG. 34449. 10 | coding    | 0. 163      | 351  | 441  | 1380 |
| MSTRG. 34446. 1  | noncoding | -0. 0036864 | 18   | 162  | 880  |
| MSTRG. 34446. 2  | noncoding | -0. 08192   | 0    | 63   | 245  |
| MSTRG. 34452. 1  | noncoding | -0. 0741376 | 0    | 237  | 760  |
| MSTRG. 34452. 2  | noncoding | -0. 0925696 | 0    | 144  | 297  |
| MSTRG. 34458. 1  | noncoding | -0. 0667648 | 444  | 558  | 961  |
| MSTRG. 34460. 1  | noncoding | -0. 098304  | 231  | 300  | 541  |
| MSTRG. 34455. 1  | coding    | 0. 09       | 0    | 99   | 418  |
| MSTRG. 34455. 2  | coding    | 0. 159      | 0    | 54   | 354  |
| MSTRG. 34467. 1  | noncoding | -0. 0786432 | 0    | 216  | 567  |
| MSTRG. 34471. 1  | noncoding | -0. 0815104 | 123  | 246  | 443  |
| MSTRG. 34478. 1  | noncoding | -0. 1060864 | 4239 | 4545 | 4713 |
| MSTRG. 34482. 3  | noncoding | -0. 0090112 | 528  | 618  | 951  |
| MSTRG. 34481. 1  | noncoding | -0. 012288  | 267  | 357  | 576  |
| MSTRG. 34486. 1  | noncoding | -0. 057344  | 0    | 75   | 228  |
| MSTRG. 34489. 1  | noncoding | -0. 03072   | 858  | 1059 | 1531 |
| MSTRG. 34501. 1  | noncoding | -0. 049152  | 0    | 120  | 435  |
| MSTRG. 34505. 1  | coding    | 0. 164      | 0    | 1677 | 2056 |

|                 |           |            |      |      |       |
|-----------------|-----------|------------|------|------|-------|
| MSTRG. 34511.1  | noncoding | -0.0135168 | 849  | 1329 | 1484  |
| MSTRG. 34511.2  | noncoding | -0.036864  | 153  | 225  | 670   |
| MSTRG. 34511.3  | noncoding | -0.036864  | 153  | 225  | 670   |
| MSTRG. 34511.4  | noncoding | -0.0290816 | 0    | 258  | 633   |
| MSTRG. 34512.1  | noncoding | -0.0442368 | 288  | 450  | 638   |
| MSTRG. 34513.1  | noncoding | -0.0712704 | 207  | 231  | 421   |
| MSTRG. 34514.1  | noncoding | -0.0385024 | 60   | 99   | 283   |
| MSTRG. 34515.1  | noncoding | -0.172032  | 210  | 255  | 411   |
| MSTRG. 34519.2  | noncoding | -0.0712704 | 243  | 267  | 663   |
| MSTRG. 34519.1  | noncoding | -0.03072   | 1086 | 1245 | 1553  |
| MSTRG. 34519.3  | noncoding | -0.0712704 | 243  | 267  | 480   |
| MSTRG. 34519.4  | noncoding | -0.0712704 | 243  | 267  | 480   |
| MSTRG. 34519.5  | noncoding | -0.049152  | 0    | 48   | 1107  |
| MSTRG. 34519.6  | noncoding | -0.049152  | 0    | 48   | 1109  |
| MSTRG. 34520.1  | noncoding | -0.0446464 | 48   | 168  | 488   |
| MSTRG. 34521.1  | noncoding | -0.0258048 | 48   | 51   | 205   |
| MSTRG. 34519.7  | noncoding | -0.0712704 | 243  | 267  | 480   |
| MSTRG. 34524.1  | noncoding | -0.0581632 | 0    | 123  | 757   |
| MSTRG. 34524.2  | noncoding | -0.0356352 | 42   | 216  | 505   |
| MSTRG. 34524.3  | noncoding | -0.0356352 | 42   | 216  | 617   |
| MSTRG. 34524.4  | noncoding | -0.0356352 | 42   | 216  | 727   |
| MSTRG. 34524.5  | noncoding | -0.0356352 | 42   | 216  | 726   |
| MSTRG. 34528.2  | noncoding | -0.0606208 | 42   | 78   | 233   |
| MSTRG. 34528.1  | noncoding | -0.0090112 | 1011 | 1158 | 1579  |
| MSTRG. 34529.1  | noncoding | -0.034816  | 348  | 540  | 1064  |
| MSTRG. 34537.1  | noncoding | -0.08192   | 7266 | 7356 | 7510  |
| MSTRG. 34537.3  | noncoding | -0.016384  | 1251 | 1362 | 2932  |
| MSTRG. 34537.2  | noncoding | -0.08192   | 525  | 615  | 769   |
| MSTRG. 34537.4  | noncoding | -0.08192   | 6264 | 6354 | 6508  |
| MSTRG. 34532.1  | noncoding | -0.055296  | 0    | 84   | 248   |
| MSTRG. 34554.1  | coding    | 0.091      | 6    | 879  | 1236  |
| MSTRG. 34556.1  | coding    | 0.051      | 147  | 720  | 873   |
| MSTRG. 34554.2  | noncoding | -0.03072   | 57   | 660  | 3684  |
| MSTRG. 34557.2  | noncoding | -0.014336  | 1020 | 1170 | 1375  |
| MSTRG. 34557.1  | noncoding | -0.1335296 | 732  | 1032 | 1185  |
| MSTRG. 34557.4  | coding    | 0.422      | 111  | 2127 | 3135  |
| MSTRG. 34550.1  | noncoding | -0.0004096 | 492  | 633  | 789   |
| MSTRG. 34550.2  | noncoding | -0.077824  | 57   | 147  | 302   |
| MSTRG. 34561.1  | noncoding | -0.0843776 | 0    | 183  | 408   |
| MSTRG. 34561.2  | noncoding | -0.0585728 | 0    | 48   | 203   |
| MSTRG. 34563.1  | noncoding | -0.028672  | 501  | 612  | 786   |
| MSTRG. 34621.2  | noncoding | -0.047104  | 2700 | 2973 | 3137  |
| MSTRG. 34621.1  | coding    | 0.122      | 351  | 1854 | 2331  |
| MSTRG. 34621.3  | noncoding | -0.0618496 | 8340 | 9114 | 11620 |
| MSTRG. 34621.4  | noncoding | -0.0278528 | 981  | 1224 | 1377  |
| MSTRG. 34621.5  | noncoding | -0.0520192 | 3369 | 3645 | 4034  |
| MSTRG. 34622.1  | noncoding | -0.057344  | 0    | 1293 | 1446  |
| MSTRG. 34621.8  | noncoding | -0.0581632 | 0    | 2625 | 2780  |
| MSTRG. 34621.6  | noncoding | -0.0548864 | 0    | 2517 | 2710  |
| MSTRG. 34621.7  | noncoding | -0.0475136 | 0    | 1821 | 1974  |
| MSTRG. 34621.11 | noncoding | -0.0577536 | 0    | 2523 | 2677  |
| MSTRG. 34621.12 | noncoding | -0.0438272 | 0    | 1920 | 2110  |
| MSTRG. 34621.10 | noncoding | -0.0610304 | 0    | 2661 | 3296  |
| MSTRG. 34621.9  | noncoding | -0.0602112 | 0    | 2805 | 2959  |

|                  |           |             |     |      |      |
|------------------|-----------|-------------|-----|------|------|
| MSTRG. 34621. 13 | noncoding | -0. 0569344 | 0   | 3330 | 3484 |
| MSTRG. 34621. 14 | noncoding | -0. 0602112 | 0   | 2601 | 2756 |
| MSTRG. 34621. 15 | noncoding | -0. 0831488 | 0   | 1143 | 1300 |
| MSTRG. 34621. 17 | noncoding | -0. 0831488 | 0   | 1140 | 1368 |
| MSTRG. 34621. 16 | noncoding | -0. 0720896 | 0   | 465  | 620  |
| MSTRG. 34621. 18 | noncoding | -0. 0811008 | 0   | 1314 | 1475 |
| MSTRG. 34622. 3  | noncoding | -0. 0557056 | 0   | 2655 | 2857 |
| MSTRG. 34622. 4  | noncoding | -0. 0434176 | 12  | 2319 | 2501 |
| MSTRG. 34622. 5  | noncoding | -0. 0446464 | 12  | 2334 | 2516 |
| MSTRG. 34622. 6  | noncoding | -0. 0499712 | 0   | 1275 | 1430 |
| MSTRG. 34622. 7  | noncoding | -0. 0454656 | 6   | 1245 | 1413 |
| MSTRG. 34622. 8  | noncoding | -0. 0548864 | 0   | 3078 | 3247 |
| MSTRG. 34622. 10 | noncoding | -0. 0815104 | 633 | 2694 | 2849 |
| MSTRG. 34622. 9  | noncoding | -0. 0831488 | 633 | 2475 | 2644 |
| MSTRG. 34622. 11 | noncoding | -0. 0679936 | 0   | 2997 | 3152 |
| MSTRG. 34622. 12 | noncoding | -0. 0622592 | 0   | 2661 | 2827 |
| MSTRG. 34622. 13 | noncoding | -0. 0610304 | 0   | 2712 | 2865 |
| MSTRG. 34622. 14 | noncoding | -0. 0679936 | 633 | 2712 | 2865 |
| MSTRG. 34622. 15 | noncoding | -0. 0495616 | 0   | 2883 | 3047 |
| MSTRG. 34622. 16 | noncoding | -0. 0524288 | 0   | 2574 | 2728 |
| MSTRG. 34568. 1  | coding    | 0. 008      | 96  | 192  | 791  |
| MSTRG. 34568. 2  | noncoding | -0. 06144   | 174 | 237  | 533  |
| MSTRG. 34569. 1  | noncoding | -0. 0278528 | 105 | 222  | 570  |
| MSTRG. 34570. 1  | noncoding | -0. 110592  | 117 | 147  | 307  |
| MSTRG. 34572. 1  | noncoding | -0. 0610304 | 645 | 867  | 1029 |
| MSTRG. 34574. 1  | noncoding | -0. 065536  | 0   | 81   | 241  |
| MSTRG. 34575. 1  | noncoding | -0. 0004096 | 0   | 48   | 235  |
| MSTRG. 34576. 1  | noncoding | -0. 0004096 | 0   | 0    | 276  |
| MSTRG. 34579. 2  | coding    | 0. 246      | 144 | 927  | 1412 |
| MSTRG. 34580. 1  | noncoding | -0. 196608  | 114 | 156  | 399  |
| MSTRG. 34583. 1  | noncoding | -0. 065536  | 0   | 12   | 1030 |
| MSTRG. 34583. 2  | noncoding | -0. 008192  | 957 | 1032 | 2698 |
| MSTRG. 34587. 1  | noncoding | -0. 0790528 | 0   | 102  | 256  |
| MSTRG. 34592. 2  | noncoding | -0. 045056  | 27  | 165  | 319  |
| MSTRG. 34592. 1  | noncoding | -0. 0004096 | 6   | 111  | 267  |
| MSTRG. 34592. 3  | noncoding | -0. 0004096 | 6   | 111  | 265  |
| MSTRG. 34592. 4  | noncoding | -0. 0380928 | 42  | 105  | 261  |
| MSTRG. 34592. 5  | noncoding | -0. 0131072 | 0   | 150  | 305  |
| MSTRG. 34595. 7  | noncoding | -0. 0233472 | 45  | 351  | 555  |
| MSTRG. 34595. 3  | noncoding | -0. 0233472 | 99  | 405  | 610  |
| MSTRG. 34595. 5  | noncoding | -0. 0233472 | 99  | 405  | 610  |
| MSTRG. 34595. 6  | noncoding | -0. 0233472 | 99  | 405  | 610  |
| MSTRG. 34595. 8  | coding    | 0. 09       | 0   | 147  | 352  |
| MSTRG. 34595. 2  | noncoding | -0. 028672  | 45  | 351  | 555  |
| MSTRG. 34595. 4  | coding    | 0. 094      | 75  | 306  | 512  |
| MSTRG. 34595. 9  | noncoding | -0. 0233472 | 99  | 405  | 608  |
| MSTRG. 34595. 10 | coding    | 0. 094      | 0   | 156  | 362  |
| MSTRG. 34595. 11 | noncoding | -0. 004096  | 21  | 156  | 390  |
| MSTRG. 34595. 12 | coding    | 0. 094      | 75  | 306  | 512  |
| MSTRG. 34595. 13 | noncoding | -0. 028672  | 45  | 351  | 553  |
| MSTRG. 34595. 14 | coding    | 0. 08       | 48  | 234  | 434  |
| MSTRG. 34595. 15 | noncoding | -0. 0282624 | 0   | 156  | 312  |
| MSTRG. 34595. 16 | noncoding | -0. 004096  | 21  | 156  | 385  |
| MSTRG. 34600. 1  | noncoding | -0. 04096   | 120 | 231  | 577  |

|                 |           |             |      |      |      |
|-----------------|-----------|-------------|------|------|------|
| MSTRG. 34601. 2 | noncoding | -0. 0380928 | 0    | 111  | 640  |
| MSTRG. 34601. 3 | noncoding | -0. 02048   | 180  | 228  | 396  |
| MSTRG. 34601. 1 | noncoding | -0. 02048   | 180  | 228  | 401  |
| MSTRG. 34603. 1 | noncoding | -0. 016384  | 0    | 120  | 495  |
| MSTRG. 34600. 2 | noncoding | -0. 022528  | 2469 | 2619 | 3071 |
| MSTRG. 34600. 3 | noncoding | -0. 024576  | 330  | 513  | 1480 |
| MSTRG. 34606. 1 | noncoding | -0. 0126976 | 147  | 297  | 655  |
| MSTRG. 34600. 5 | noncoding | -0. 024576  | 936  | 1119 | 2508 |
| MSTRG. 34600. 4 | coding    | 0. 119      | 1674 | 1854 | 2253 |
| MSTRG. 34600. 6 | noncoding | -0. 045056  | 18   | 180  | 593  |
| MSTRG. 34597. 1 | noncoding | -0. 0147456 | 6    | 540  | 696  |
| MSTRG. 34612. 1 | noncoding | -0. 069632  | 120  | 150  | 734  |
| MSTRG. 34613. 1 | noncoding | -0. 0417792 | 168  | 210  | 536  |
| MSTRG. 34611. 1 | noncoding | -0. 0417792 | 54   | 96   | 518  |
| MSTRG. 34616. 1 | noncoding | -0. 0417792 | 12   | 213  | 367  |
| MSTRG. 34616. 2 | noncoding | -0. 0417792 | 12   | 213  | 367  |
| MSTRG. 34616. 3 | noncoding | -0. 0638976 | 0    | 177  | 332  |
| MSTRG. 34616. 4 | noncoding | -0. 0417792 | 27   | 228  | 383  |
| MSTRG. 34616. 5 | noncoding | -0. 0417792 | 12   | 213  | 367  |
| MSTRG. 34615. 1 | noncoding | -0. 028672  | 0    | 81   | 237  |
| MSTRG. 34619. 1 | coding    | 0. 163      | 0    | 228  | 383  |
| MSTRG. 34631. 3 | coding    | 0. 276      | 0    | 819  | 1309 |
| MSTRG. 34631. 2 | coding    | 0. 274      | 0    | 816  | 1957 |
| MSTRG. 34632. 1 | noncoding | -0. 0786432 | 0    | 159  | 655  |
| MSTRG. 34633. 1 | noncoding | -0. 0376832 | 0    | 243  | 488  |
| MSTRG. 34632. 2 | noncoding | -0. 0946176 | 0    | 114  | 343  |
| MSTRG. 34638. 2 | coding    | 0. 126      | 549  | 1659 | 5010 |
| MSTRG. 34638. 1 | coding    | 0. 166      | 549  | 1182 | 1336 |
| MSTRG. 34637. 2 | coding    | 0. 177      | 603  | 2604 | 3590 |
| MSTRG. 34637. 4 | coding    | 0. 177      | 573  | 2574 | 3455 |
| MSTRG. 34653. 1 | coding    | 0. 218      | 0    | 441  | 742  |
| MSTRG. 34655. 2 | noncoding | -0. 0684032 | 1662 | 1836 | 2731 |
| MSTRG. 34655. 1 | noncoding | -0. 0684032 | 1662 | 1836 | 3208 |
| MSTRG. 34656. 2 | noncoding | -0. 0073728 | 414  | 426  | 732  |
| MSTRG. 34656. 1 | noncoding | -0. 0073728 | 414  | 426  | 1160 |
| MSTRG. 34657. 1 | noncoding | -0. 0004096 | 546  | 546  | 1316 |
| MSTRG. 34660. 1 | noncoding | -0. 0004096 | 0    | 0    | 228  |
| MSTRG. 34661. 1 | noncoding | -0. 8192    | 171  | 174  | 337  |
| MSTRG. 34653. 2 | noncoding | -0. 006144  | 189  | 333  | 526  |
| MSTRG. 34664. 1 | noncoding | -0. 0610304 | 345  | 543  | 713  |
| MSTRG. 34666. 1 | noncoding | -0. 008192  | 45   | 90   | 519  |
| MSTRG. 34671. 1 | noncoding | -0. 016384  | 141  | 282  | 2707 |
| MSTRG. 34646. 1 | noncoding | -0. 425984  | 45   | 57   | 210  |
| MSTRG. 34647. 3 | coding    | 0. 253      | 105  | 345  | 652  |
| MSTRG. 34647. 1 | coding    | 0. 257      | 105  | 348  | 761  |
| MSTRG. 34675. 3 | coding    | 0. 194      | 162  | 381  | 536  |
| MSTRG. 34675. 2 | coding    | 0. 154      | 99   | 309  | 462  |
| MSTRG. 34675. 4 | noncoding | -0. 0323584 | 69   | 264  | 419  |
| MSTRG. 34675. 5 | noncoding | -0. 0258048 | 63   | 246  | 401  |
| MSTRG. 34681. 2 | coding    | 0. 15       | 858  | 1827 | 5164 |
| MSTRG. 34681. 4 | coding    | 0. 15       | 219  | 1188 | 1594 |
| MSTRG. 34681. 3 | coding    | 0. 15       | 456  | 1425 | 3276 |
| MSTRG. 34682. 7 | coding    | 0. 15       | 348  | 1314 | 1729 |
| MSTRG. 34682. 9 | coding    | 0. 15       | 348  | 1314 | 1717 |

|                  |           |             |      |      |      |
|------------------|-----------|-------------|------|------|------|
| MSTRG. 34682. 11 | coding    | 0. 15       | 348  | 1314 | 1765 |
| MSTRG. 34682. 12 | coding    | 0. 15       | 348  | 1314 | 1765 |
| MSTRG. 34683. 1  | noncoding | -0. 012288  | 204  | 327  | 481  |
| MSTRG. 34707. 1  | noncoding | -0. 0438272 | 0    | 36   | 350  |
| MSTRG. 34708. 1  | noncoding | -0. 0004096 | 0    | 0    | 285  |
| MSTRG. 34712. 1  | noncoding | -0. 069632  | 132  | 201  | 1006 |
| MSTRG. 34714. 1  | noncoding | -0. 004096  | 462  | 537  | 765  |
| MSTRG. 34715. 1  | coding    | 0. 34       | 108  | 1032 | 1186 |
| MSTRG. 34716. 1  | noncoding | -0. 0004096 | 0    | 0    | 236  |
| MSTRG. 34717. 1  | noncoding | -0. 094208  | 363  | 390  | 1523 |
| MSTRG. 34715. 2  | coding    | 0. 374      | 93   | 1095 | 1519 |
| MSTRG. 34715. 3  | coding    | 0. 37       | 93   | 981  | 1137 |
| MSTRG. 34718. 1  | noncoding | -0. 012288  | 147  | 195  | 506  |
| MSTRG. 34719. 1  | noncoding | -0. 126976  | 96   | 105  | 314  |
| MSTRG. 34720. 1  | noncoding | -0. 0069632 | 234  | 366  | 1113 |
| MSTRG. 34721. 1  | noncoding | -0. 012288  | 1437 | 1608 | 2316 |
| MSTRG. 34722. 1  | noncoding | -0. 036864  | 39   | 105  | 587  |
| MSTRG. 34715. 4  | coding    | 0. 366      | 93   | 1098 | 1937 |
| MSTRG. 34723. 1  | noncoding | -0. 0077824 | 9    | 279  | 563  |
| MSTRG. 34723. 2  | noncoding | -0. 0729088 | 648  | 705  | 984  |
| MSTRG. 34724. 1  | coding    | 0. 301      | 105  | 1074 | 1689 |
| MSTRG. 34725. 1  | noncoding | -0. 0131072 | 0    | 105  | 349  |
| MSTRG. 34719. 2  | noncoding | -0. 0024576 | 0    | 60   | 1296 |
| MSTRG. 34717. 2  | noncoding | -0. 094208  | 441  | 468  | 677  |
| MSTRG. 34717. 3  | noncoding | -0. 094208  | 351  | 378  | 587  |
| MSTRG. 34726. 1  | coding    | 0. 123      | 54   | 831  | 1296 |
| MSTRG. 34715. 5  | coding    | 0. 308      | 72   | 642  | 798  |
| MSTRG. 34727. 1  | noncoding | -0. 008192  | 258  | 357  | 510  |
| MSTRG. 34687. 1  | noncoding | -0. 126976  | 162  | 171  | 414  |
| MSTRG. 34689. 2  | noncoding | -0. 018432  | 57   | 216  | 545  |
| MSTRG. 34690. 2  | coding    | 0. 194      | 1806 | 2769 | 3378 |
| MSTRG. 34692. 1  | noncoding | -0. 02048   | 129  | 147  | 302  |
| MSTRG. 34701. 1  | noncoding | -0. 0024576 | 192  | 252  | 461  |
| MSTRG. 34702. 1  | coding    | 0. 198      | 0    | 255  | 481  |
| MSTRG. 34729. 1  | noncoding | -0. 012288  | 72   | 345  | 776  |
| MSTRG. 34743. 1  | coding    | 0. 165      | 0    | 210  | 852  |
| MSTRG. 34743. 2  | coding    | 0. 264      | 0    | 315  | 955  |
| MSTRG. 34744. 2  | coding    | 0. 083      | 0    | 1299 | 1673 |
| MSTRG. 34744. 3  | coding    | 0. 085      | 105  | 1461 | 1673 |
| MSTRG. 34744. 4  | coding    | 0. 086      | 12   | 1296 | 1529 |
| MSTRG. 34744. 5  | coding    | 0. 067      | 1359 | 2859 | 5445 |
| MSTRG. 34751. 1  | coding    | 0. 094      | 249  | 849  | 1174 |
| MSTRG. 34755. 2  | coding    | 0. 264      | 897  | 2097 | 2744 |
| MSTRG. 34755. 1  | coding    | 0. 202      | 897  | 2922 | 3534 |
| MSTRG. 34761. 2  | coding    | 0. 087      | 336  | 753  | 906  |
| MSTRG. 34763. 2  | noncoding | -0. 0462848 | 0    | 84   | 1399 |
| MSTRG. 34764. 1  | noncoding | -0. 0221184 | 0    | 150  | 503  |
| MSTRG. 34771. 9  | noncoding | -0. 0053248 | 96   | 372  | 605  |
| MSTRG. 34771. 13 | noncoding | -0. 0053248 | 96   | 372  | 604  |
| MSTRG. 34778. 1  | noncoding | -0. 0241664 | 99   | 405  | 615  |
| MSTRG. 34778. 3  | noncoding | -0. 01024   | 42   | 276  | 431  |
| MSTRG. 34778. 4  | noncoding | -0. 01024   | 42   | 276  | 431  |
| MSTRG. 34778. 5  | noncoding | -0. 0004096 | 99   | 375  | 610  |
| MSTRG. 34778. 6  | noncoding | -0. 0004096 | 99   | 375  | 610  |
