# Supplementary material for: Identification of Novel lncRNA and Differentially Expressed Genes (DEGs) of Testicular Tissues among Cattle, Yak, and Cattle-Yak Associated with Male Infertility
Source: MDPI journal article supplement (doi:10.3390/ani11082420), 2021-08-17
Supplement: s1 [file s1]

| #ID           | peptide_length | Fickett_score | pI           | ORF_integrity |
|---------------|----------------|---------------|--------------|---------------|
| MSTRG. 12. 1  | 128            | 0. 34696      | 7. 794006348 | 1             |
| MSTRG. 12. 2  | 79             | 0. 35564      | 10. 80621338 | 1             |
| MSTRG. 12. 3  | 79             | 0. 36001      | 10. 80621338 | 1             |
| MSTRG. 32. 2  | 150            | 0. 30796      | 6. 080749512 | 1             |
| MSTRG. 33. 1  | 64             | 0. 40011      | 5. 993103027 | 1             |
| MSTRG. 34. 2  | 293            | 0. 40653      | 8. 83380127  | 1             |
| MSTRG. 35. 1  | 84             | 0. 44034      | 9. 491638184 | 1             |
| MSTRG. 39. 3  | 66             | 0. 39042      | 7. 87689209  | 1             |
| MSTRG. 39. 6  | 489            | 0. 34455      | 7. 442321777 | 1             |
| MSTRG. 59. 3  | 280            | 0. 35659      | 5. 304016113 | 1             |
| MSTRG. 60. 1  | 134            | 0. 34931      | 8. 710632324 | 1             |
| MSTRG. 61. 1  | 160            | 0. 39483      | 10. 48895264 | -1            |
| MSTRG. 60. 2  | 119            | 0. 30919      | 8. 764953613 | 1             |
| MSTRG. 63. 2  | 620            | 0. 39326      | 9. 285705566 | 1             |
| MSTRG. 63. 4  | 349            | 0. 49018      | 5. 421569824 | 1             |
| MSTRG. 63. 6  | 349            | 0. 35797      | 5. 421569824 | 1             |
| MSTRG. 63. 7  | 406            | 0. 44125      | 10. 0022583  | 1             |
| MSTRG. 63. 5  | 349            | 0. 42075      | 5. 421569824 | 1             |
| MSTRG. 63. 8  | 349            | 0. 41566      | 5. 421569824 | 1             |
| MSTRG. 63. 3  | 620            | 0. 33091      | 9. 285705566 | 1             |
| MSTRG. 65. 10 | 2291           | 0. 43059      | 5. 26348877  | 1             |
| MSTRG. 65. 11 | 2304           | 0. 42907      | 5. 203430176 | 1             |
| MSTRG. 65. 4  | 2401           | 0. 43059      | 5. 417785645 | 1             |
| MSTRG. 65. 5  | 2412           | 0. 43059      | 5. 39276123  | 1             |
| MSTRG. 65. 6  | 2408           | 0. 44445      | 5. 463562012 | 1             |
| MSTRG. 65. 8  | 2445           | 0. 43059      | 5. 465393066 | 1             |
| MSTRG. 65. 9  | 2301           | 0. 42907      | 5. 251525879 | 1             |
| MSTRG. 65. 14 | 2084           | 0. 40863      | 5. 242980957 | 1             |
| MSTRG. 65. 15 | 2074           | 0. 40863      | 5. 256164551 | 1             |
| MSTRG. 65. 16 | 2077           | 0. 40863      | 5. 202697754 | 1             |
| MSTRG. 66. 1  | 1010           | 0. 4505       | 6. 006164551 | 1             |
| MSTRG. 66. 2  | 1010           | 0. 45358      | 6. 006164551 | 1             |
| MSTRG. 66. 3  | 1010           | 0. 46793      | 6. 006164551 | 1             |
| MSTRG. 66. 4  | 1010           | 0. 45358      | 6. 006164551 | 1             |
| MSTRG. 68. 2  | 380            | 0. 33126      | 9. 426818848 | 1             |
| MSTRG. 42. 1  | 560            | 0. 37183      | 5. 089416504 | 1             |
| MSTRG. 56. 2  | 482            | 0. 3765       | 5. 250427246 | 1             |
| MSTRG. 56. 4  | 485            | 0. 3765       | 5. 250427246 | 1             |
| MSTRG. 56. 6  | 472            | 0. 35788      | 5. 09552002  | 1             |
| MSTRG. 56. 7  | 483            | 0. 43921      | 5. 250427246 | 1             |
| MSTRG. 56. 8  | 481            | 0. 44245      | 5. 250427246 | 1             |
| MSTRG. 52. 1  | 1529           | 0. 4455       | 6. 603210449 | 1             |
| MSTRG. 52. 2  | 1562           | 0. 42187      | 8. 266906738 | 1             |
| MSTRG. 53. 1  | 290            | 0. 43242      | 6. 636657715 | 1             |
| MSTRG. 53. 2  | 191            | 0. 34974      | 8. 406311035 | 1             |
| MSTRG. 70. 1  | 194            | 0. 29294      | 7. 729309082 | 1             |
| MSTRG. 73. 2  | 1120           | 0. 45607      | 9. 679748535 | 1             |
| MSTRG. 78. 1  | 231            | 0. 28338      | 9. 469909668 | 1             |
| MSTRG. 79. 2  | 187            | 0. 32741      | 10. 02825928 | 1             |
| MSTRG. 78. 2  | 289            | 0. 31516      | 9. 847106934 | 1             |
| MSTRG. 80. 1  | 56             | 0. 4045       | 10. 0479126  | -1            |
| MSTRG. 81. 1  | 107            | 0. 37339      | 6. 014465332 | 1             |
| MSTRG. 79. 3  | 217            | 0. 28167      | 9. 250305176 | 1             |

|               |      |          |              |    |
|---------------|------|----------|--------------|----|
| MSTRG. 82. 1  | 64   | 0. 41672 | 11. 84906006 | -1 |
| MSTRG. 79. 4  | 74   | 0. 28109 | 10. 36798096 | 1  |
| MSTRG. 79. 5  | 173  | 0. 27274 | 9. 09552002  | 1  |
| MSTRG. 79. 6  | 173  | 0. 33828 | 9. 09552002  | 1  |
| MSTRG. 83. 1  | 163  | 0. 36521 | 4. 596618652 | 1  |
| MSTRG. 79. 7  | 143  | 0. 28002 | 9. 427307129 | 1  |
| MSTRG. 85. 1  | 86   | 0. 34296 | 6. 89276123  | 1  |
| MSTRG. 86. 1  | 94   | 0. 28167 | 9. 206481934 | 1  |
| MSTRG. 96. 9  | 731  | 0. 45637 | 5. 741760254 | 1  |
| MSTRG. 96. 10 | 826  | 0. 47613 | 5. 97076416  | 1  |
| MSTRG. 96. 6  | 826  | 0. 45737 | 5. 97076416  | 1  |
| MSTRG. 96. 8  | 731  | 0. 46585 | 5. 741760254 | 1  |
| MSTRG. 96. 3  | 826  | 0. 46585 | 5. 97076416  | 1  |
| MSTRG. 97. 1  | 100  | 0. 35133 | 6. 101745605 | 1  |
| MSTRG. 97. 2  | 290  | 0. 38392 | 5. 312805176 | 1  |
| MSTRG. 91. 1  | 106  | 0. 33599 | 7. 820251465 | 1  |
| MSTRG. 103. 6 | 520  | 0. 42403 | 5. 34564209  | 1  |
| MSTRG. 103. 2 | 991  | 0. 34138 | 6. 108581543 | 1  |
| MSTRG. 103. 5 | 1561 | 0. 42883 | 5. 706481934 | 1  |
| MSTRG. 103. 4 | 1567 | 0. 46105 | 5. 738098145 | 1  |
| MSTRG. 104. 1 | 214  | 0. 4362  | 5. 018859863 | 1  |
| MSTRG. 104. 3 | 192  | 0. 45623 | 4. 578063965 | 1  |
| MSTRG. 111. 1 | 49   | 0. 41714 | 9. 496398926 | 1  |
| MSTRG. 117. 6 | 454  | 0. 47275 | 4. 879577637 | 1  |
| MSTRG. 118. 5 | 108  | 0. 40454 | 9. 298278809 | 1  |
| MSTRG. 123. 1 | 53   | 0. 39032 | 6. 504333496 | 1  |
| MSTRG. 127. 1 | 52   | 0. 41895 | 10. 15692139 | 1  |
| MSTRG. 131. 1 | 43   | 0. 40287 | 7. 97845459  | -1 |
| MSTRG. 132. 1 | 115  | 0. 30876 | 9. 503234863 | 1  |
| MSTRG. 134. 1 | 72   | 0. 40375 | 9. 300476074 | 1  |
| MSTRG. 151. 1 | 84   | 0. 28862 | 9. 89642334  | 1  |
| MSTRG. 188. 1 | 281  | 0. 2921  | 9. 54864502  | 1  |
| MSTRG. 189. 1 | 97   | 0. 28238 | 7. 629333496 | 1  |
| MSTRG. 193. 1 | 71   | 0. 36569 | 5. 99420166  | 1  |
| MSTRG. 196. 1 | 83   | 0. 45274 | 4. 95135498  | 1  |
| MSTRG. 223. 1 | 67   | 0. 34413 | 9. 745788574 | 1  |
| MSTRG. 241. 1 | 250  | 0. 30934 | 9. 408630371 | -1 |
| MSTRG. 158. 1 | 668  | 0. 38619 | 5. 698181152 | 1  |
| MSTRG. 158. 6 | 602  | 0. 46477 | 5. 969421387 | 1  |
| MSTRG. 158. 5 | 695  | 0. 48268 | 6. 018859863 | 1  |
| MSTRG. 158. 4 | 696  | 0. 44483 | 6. 017028809 | 1  |
| MSTRG. 158. 8 | 1081 | 0. 47243 | 5. 22857666  | 1  |
| MSTRG. 158. 7 | 639  | 0. 46992 | 5. 530334473 | 1  |
| MSTRG. 158. 9 | 492  | 0. 3843  | 5. 348205566 | 1  |
| MSTRG. 160. 1 | 52   | 0. 36175 | 9. 301452637 | 1  |
| MSTRG. 160. 3 | 1156 | 0. 39672 | 8. 444396973 | 1  |
| MSTRG. 160. 4 | 1156 | 0. 36746 | 8. 444396973 | 1  |
| MSTRG. 160. 5 | 1156 | 0. 39672 | 8. 444396973 | 1  |
| MSTRG. 160. 6 | 1156 | 0. 38839 | 8. 444396973 | 1  |
| MSTRG. 161. 1 | 62   | 0. 37378 | 9. 249084473 | 1  |
| MSTRG. 162. 1 | 162  | 0. 31368 | 9. 948791504 | 1  |
| MSTRG. 162. 2 | 91   | 0. 31048 | 9. 821960449 | 1  |
| MSTRG. 160. 7 | 93   | 0. 31853 | 8. 770690918 | 1  |
| MSTRG. 163. 1 | 402  | 0. 49562 | 5. 159118652 | 1  |

|                |      |          |               |    |
|----------------|------|----------|---------------|----|
| MSTRG. 163. 3  | 359  | 0. 37335 | 5. 144470215  | 1  |
| MSTRG. 164. 1  | 150  | 0. 47021 | 5. 06060791   | -1 |
| MSTRG. 166. 2  | 131  | 0. 36085 | 8. 848083496  | 1  |
| MSTRG. 168. 2  | 79   | 0. 45829 | 5. 649841309  | 1  |
| MSTRG. 169. 1  | 41   | 0. 43347 | 10. 59552002  | 1  |
| MSTRG. 175. 3  | 1418 | 0. 46244 | 6. 03717041   | 1  |
| MSTRG. 175. 4  | 63   | 0. 3413  | 9. 433654785  | 1  |
| MSTRG. 175. 5  | 1274 | 0. 43859 | 5. 898132324  | -1 |
| MSTRG. 175. 6  | 728  | 0. 43553 | 5. 644470215  | 1  |
| MSTRG. 265. 8  | 117  | 0. 29059 | 9. 020935059  | 1  |
| MSTRG. 265. 9  | 210  | 0. 28982 | 4. 955871582  | 1  |
| MSTRG. 266. 1  | 94   | 0. 32986 | 4. 952941895  | 1  |
| MSTRG. 267. 1  | 252  | 0. 36573 | 9. 406188965  | 1  |
| MSTRG. 268. 1  | 60   | 0. 3118  | 10. 2744751   | 1  |
| MSTRG. 269. 1  | 54   | 0. 3208  | 6. 69708252   | 1  |
| MSTRG. 268. 2  | 183  | 0. 33313 | 10. 02410889  | 1  |
| MSTRG. 270. 1  | 114  | 0. 29543 | 11. 00006104  | 1  |
| MSTRG. 271. 1  | 78   | 0. 27831 | 5. 60736084   | 1  |
| MSTRG. 272. 1  | 113  | 0. 27517 | 9. 936218262  | 1  |
| MSTRG. 273. 1  | 99   | 0. 29374 | 10. 41595459  | 1  |
| MSTRG. 274. 1  | 74   | 0. 28159 | 10. 36431885  | 1  |
| MSTRG. 275. 1  | 178  | 0. 31513 | 9. 945129395  | 1  |
| MSTRG. 276. 1  | 59   | 0. 3036  | 6. 469055176  | 1  |
| MSTRG. 277. 1  | 99   | 0. 28644 | 10. 61419678  | 1  |
| MSTRG. 277. 2  | 123  | 0. 31368 | 10. 10919189  | 1  |
| MSTRG. 278. 1  | 190  | 0. 3     | 6. 438049316  | 1  |
| MSTRG. 265. 10 | 88   | 0. 2921  | 8. 03302002   | 1  |
| MSTRG. 265. 11 | 180  | 0. 28958 | 9. 281433105  | 1  |
| MSTRG. 279. 1  | 189  | 0. 28334 | 11. 04364014  | 1  |
| MSTRG. 265. 12 | 82   | 0. 2831  | 8. 664978027  | 1  |
| MSTRG. 280. 1  | 120  | 0. 25957 | 9. 045837402  | 1  |
| MSTRG. 281. 1  | 140  | 0. 26633 | 8. 314880371  | 1  |
| MSTRG. 282. 1  | 88   | 0. 25588 | 6. 468566895  | 1  |
| MSTRG. 283. 1  | 81   | 0. 29895 | 8. 979431152  | 1  |
| MSTRG. 284. 1  | 142  | 0. 28178 | 10. 0269165   | 1  |
| MSTRG. 284. 2  | 160  | 0. 29366 | 10. 34259033  | 1  |
| MSTRG. 265. 14 | 151  | 0. 28982 | 9. 914611816  | 1  |
| MSTRG. 285. 1  | 228  | 0. 30736 | 8. 207458496  | 1  |
| MSTRG. 250. 1  | 122  | 0. 29003 | 7. 8644440918 | 1  |
| MSTRG. 255. 1  | 160  | 0. 30816 | 9. 409973145  | 1  |
| MSTRG. 258. 1  | 75   | 0. 3118  | 8. 664245605  | 1  |
| MSTRG. 261. 1  | 121  | 0. 38    | 10. 97833252  | 1  |
| MSTRG. 262. 1  | 56   | 0. 28165 | 8. 503356934  | 1  |
| MSTRG. 263. 1  | 52   | 0. 27893 | 8. 358947754  | 1  |
| MSTRG. 297. 1  | 69   | 0. 38711 | 7. 925109863  | 1  |
| MSTRG. 307. 1  | 329  | 0. 31852 | 5. 797912598  | 1  |
| MSTRG. 308. 1  | 75   | 0. 3208  | 5. 43939209   | 1  |
| MSTRG. 312. 1  | 76   | 0. 38478 | 8. 740539551  | -1 |
| MSTRG. 314. 1  | 399  | 0. 37001 | 5. 410949707  | 1  |
| MSTRG. 314. 3  | 917  | 0. 40399 | 5. 430114746  | 1  |
| MSTRG. 325. 3  | 697  | 0. 47843 | 6. 514343262  | 1  |
| MSTRG. 325. 4  | 698  | 0. 47471 | 6. 514343262  | 1  |
| MSTRG. 326. 1  | 84   | 0. 32641 | 10. 20220947  | 1  |
| MSTRG. 327. 1  | 177  | 0. 32213 | 9. 558044434  | 1  |

|               |      |          |              |    |
|---------------|------|----------|--------------|----|
| MSTRG. 324. 1 | 36   | 0. 37762 | 9. 515563965 | -1 |
| MSTRG. 328. 1 | 53   | 0. 27446 | 6. 696228027 | 1  |
| MSTRG. 328. 2 | 83   | 0. 30508 | 5. 386657715 | -1 |
| MSTRG. 332. 1 | 147  | 0. 33298 | 9. 19744873  | 1  |
| MSTRG. 348. 1 | 38   | 0. 46701 | 4. 830993652 | 1  |
| MSTRG. 351. 1 | 429  | 0. 46045 | 6. 107849121 | 1  |
| MSTRG. 352. 1 | 189  | 0. 28662 | 10. 53656006 | 1  |
| MSTRG. 353. 1 | 110  | 0. 35253 | 6. 371520996 | 1  |
| MSTRG. 356. 1 | 161  | 0. 29575 | 10. 07757568 | 1  |
| MSTRG. 361. 1 | 33   | 0. 40095 | 11. 73394775 | 1  |
| MSTRG. 375. 2 | 2848 | 0. 49497 | 4. 981262207 | 1  |
| MSTRG. 375. 5 | 2705 | 0. 47652 | 5. 014831543 | 1  |
| MSTRG. 377. 1 | 51   | 0. 41182 | 4. 944641113 | 1  |
| MSTRG. 377. 2 | 62   | 0. 39293 | 7. 809875488 | 1  |
| MSTRG. 379. 3 | 484  | 0. 44779 | 7. 216247559 | 1  |
| MSTRG. 379. 5 | 461  | 0. 45329 | 6. 651062012 | 1  |
| MSTRG. 369. 1 | 51   | 0. 40426 | 9. 301208496 | 1  |
| MSTRG. 370. 1 | 44   | 0. 39912 | 7. 804748535 | -1 |
| MSTRG. 371. 1 | 253  | 0. 33735 | 5. 390808105 | 1  |
| MSTRG. 381. 3 | 757  | 0. 37186 | 6. 36541748  | 1  |
| MSTRG. 396. 1 | 911  | 0. 41204 | 5. 840270996 | 1  |
| MSTRG. 397. 1 | 70   | 0. 29387 | 10. 87786865 | 1  |
| MSTRG. 396. 3 | 893  | 0. 46364 | 6. 00592041  | 1  |
| MSTRG. 398. 1 | 75   | 0. 27433 | 4. 272766113 | 1  |
| MSTRG. 399. 1 | 90   | 0. 31852 | 9. 27142334  | 1  |
| MSTRG. 400. 1 | 74   | 0. 28982 | 7. 694274902 | 1  |
| MSTRG. 401. 1 | 128  | 0. 29772 | 6. 01348877  | 1  |
| MSTRG. 404. 3 | 452  | 0. 38695 | 5. 367614746 | 1  |
| MSTRG. 404. 4 | 286  | 0. 39948 | 4. 79473877  | 1  |
| MSTRG. 404. 6 | 422  | 0. 37853 | 5. 937316895 | 1  |
| MSTRG. 404. 5 | 321  | 0. 32162 | 6. 273132324 | 1  |
| MSTRG. 404. 7 | 407  | 0. 37853 | 5. 933532715 | 1  |
| MSTRG. 404. 8 | 104  | 0. 26157 | 9. 358947754 | 1  |
| MSTRG. 391. 3 | 529  | 0. 48067 | 6. 99017334  | 1  |
| MSTRG. 392. 2 | 120  | 0. 31603 | 9. 653625488 | 1  |
| MSTRG. 393. 2 | 63   | 0. 33825 | 4. 763122559 | 1  |
| MSTRG. 405. 1 | 397  | 0. 43257 | 5. 014343262 | 1  |
| MSTRG. 405. 7 | 540  | 0. 39299 | 7. 558288574 | 1  |
| MSTRG. 405. 3 | 397  | 0. 44017 | 5. 014343262 | 1  |
| MSTRG. 405. 4 | 541  | 0. 39299 | 7. 558288574 | 1  |
| MSTRG. 405. 5 | 396  | 0. 44017 | 5. 014343262 | 1  |
| MSTRG. 405. 6 | 400  | 0. 44017 | 4. 944763184 | 1  |
| MSTRG. 405. 8 | 464  | 0. 41326 | 5. 60369873  | 1  |
| MSTRG. 405. 9 | 80   | 0. 37786 | 10. 03692627 | 1  |
| MSTRG. 407. 1 | 447  | 0. 47081 | 9. 300109863 | 1  |
| MSTRG. 416. 1 | 99   | 0. 40312 | 10. 01654053 | 1  |
| MSTRG. 423. 2 | 57   | 0. 35768 | 9. 300598145 | 1  |
| MSTRG. 424. 1 | 1052 | 0. 40501 | 8. 326965332 | 1  |
| MSTRG. 424. 2 | 1052 | 0. 42968 | 8. 326965332 | 1  |
| MSTRG. 424. 3 | 768  | 0. 3873  | 8. 452209473 | 1  |
| MSTRG. 426. 1 | 204  | 0. 32818 | 10. 12713623 | 1  |
| MSTRG. 427. 1 | 122  | 0. 2785  | 6. 376281738 | 1  |
| MSTRG. 429. 1 | 873  | 0. 46615 | 5. 161560059 | 1  |
| MSTRG. 429. 2 | 853  | 0. 47791 | 5. 047912598 | 1  |



|                |      |          |              |    |
|----------------|------|----------|--------------|----|
| MSTRG. 449. 1  | 20   | 0. 36292 | 8. 384094238 | 1  |
| MSTRG. 451. 1  | 287  | 0. 28982 | 8. 590026855 | 1  |
| MSTRG. 451. 2  | 114  | 0. 33851 | 6. 428161621 | 1  |
| MSTRG. 452. 1  | 65   | 0. 32632 | 10. 61297607 | 1  |
| MSTRG. 457. 1  | 129  | 0. 28982 | 5. 711730957 | 1  |
| MSTRG. 435. 3  | 217  | 0. 45123 | 5. 806335449 | 1  |
| MSTRG. 439. 1  | 99   | 0. 26633 | 7. 682067871 | 1  |
| MSTRG. 438. 2  | 176  | 0. 33061 | 8. 774597168 | 1  |
| MSTRG. 440. 1  | 108  | 0. 28726 | 5. 808776855 | 1  |
| MSTRG. 441. 1  | 187  | 0. 29754 | 9. 255187988 | 1  |
| MSTRG. 467. 6  | 84   | 0. 32236 | 11. 04364014 | 1  |
| MSTRG. 467. 7  | 65   | 0. 38461 | 9. 831237793 | 1  |
| MSTRG. 468. 1  | 103  | 0. 29615 | 8. 897155762 | 1  |
| MSTRG. 468. 2  | 128  | 0. 28982 | 11. 64971924 | 1  |
| MSTRG. 468. 3  | 63   | 0. 29327 | 6. 950012207 | 1  |
| MSTRG. 468. 4  | 105  | 0. 30328 | 9. 689147949 | 1  |
| MSTRG. 468. 5  | 203  | 0. 3208  | 8. 676940918 | 1  |
| MSTRG. 470. 1  | 60   | 0. 29433 | 8. 289123535 | 1  |
| MSTRG. 467. 10 | 912  | 0. 36597 | 8. 79510498  | 1  |
| MSTRG. 467. 9  | 942  | 0. 37806 | 9. 00213623  | 1  |
| MSTRG. 467. 11 | 749  | 0. 3413  | 9. 275695801 | 1  |
| MSTRG. 471. 1  | 83   | 0. 33194 | 4. 641662598 | 1  |
| MSTRG. 472. 1  | 168  | 0. 3176  | 10. 7074585  | 1  |
| MSTRG. 463. 1  | 321  | 0. 30303 | 8. 047912598 | 1  |
| MSTRG. 463. 4  | 310  | 0. 39577 | 8. 056335449 | 1  |
| MSTRG. 464. 1  | 68   | 0. 33929 | 6. 692932129 | 1  |
| MSTRG. 474. 1  | 53   | 0. 35131 | 9. 138000488 | 1  |
| MSTRG. 479. 1  | 365  | 0. 44333 | 5. 661804199 | 1  |
| MSTRG. 481. 2  | 38   | 0. 36817 | 5. 327941895 | 1  |
| MSTRG. 481. 1  | 75   | 0. 41569 | 9. 52142334  | -1 |
| MSTRG. 487. 2  | 588  | 0. 45793 | 5. 556213379 | 1  |
| MSTRG. 488. 3  | 470  | 0. 41777 | 5. 292419434 | 1  |
| MSTRG. 484. 1  | 26   | 0. 395   | 4. 351989746 | -1 |
| MSTRG. 493. 1  | 68   | 0. 39821 | 9. 570983887 | 1  |
| MSTRG. 497. 1  | 50   | 0. 44249 | 12. 01300049 | -1 |
| MSTRG. 506. 1  | 55   | 0. 39236 | 4. 258850098 | 1  |
| MSTRG. 508. 3  | 334  | 0. 38857 | 5. 536071777 | 1  |
| MSTRG. 508. 4  | 337  | 0. 37471 | 5. 518005371 | 1  |
| MSTRG. 508. 2  | 549  | 0. 44402 | 5. 703186035 | 1  |
| MSTRG. 508. 5  | 546  | 0. 32762 | 5. 711364746 | 1  |
| MSTRG. 509. 1  | 106  | 0. 33122 | 9. 80267334  | -1 |
| MSTRG. 512. 2  | 52   | 0. 33951 | 6. 885559082 | 1  |
| MSTRG. 513. 4  | 1116 | 0. 38389 | 8. 015441895 | 1  |
| MSTRG. 514. 4  | 929  | 0. 46219 | 8. 68182373  | 1  |
| MSTRG. 514. 3  | 1166 | 0. 46079 | 7. 158874512 | 1  |
| MSTRG. 514. 5  | 1108 | 0. 47924 | 7. 812072754 | 1  |
| MSTRG. 515. 1  | 119  | 0. 33779 | 9. 517028809 | 1  |
| MSTRG. 521. 1  | 425  | 0. 39376 | 6. 828674316 | 1  |
| MSTRG. 521. 3  | 425  | 0. 37077 | 6. 828674316 | 1  |
| MSTRG. 521. 4  | 210  | 0. 32322 | 8. 860290527 | 1  |
| MSTRG. 521. 6  | 209  | 0. 3216  | 9. 259338379 | 1  |
| MSTRG. 521. 7  | 331  | 0. 44183 | 6. 305969238 | 1  |
| MSTRG. 526. 3  | 262  | 0. 34952 | 9. 452209473 | 1  |
| MSTRG. 526. 1  | 288  | 0. 32465 | 9. 356994629 | 1  |

|                |     |          |              |    |
|----------------|-----|----------|--------------|----|
| MSTRG. 526. 2  | 156 | 0. 29115 | 9. 87701416  | 1  |
| MSTRG. 527. 2  | 211 | 0. 28794 | 9. 761779785 | 1  |
| MSTRG. 533. 2  | 23  | 0. 46425 | 5. 585144043 | 1  |
| MSTRG. 533. 3  | 898 | 0. 46629 | 6. 141662598 | 1  |
| MSTRG. 535. 1  | 169 | 0. 36184 | 8. 961730957 | 1  |
| MSTRG. 535. 4  | 95  | 0. 30419 | 8. 565124512 | 1  |
| MSTRG. 538. 1  | 618 | 0. 40125 | 5. 414978027 | 1  |
| MSTRG. 538. 2  | 618 | 0. 40643 | 5. 414978027 | 1  |
| MSTRG. 538. 3  | 618 | 0. 41511 | 5. 414978027 | 1  |
| MSTRG. 538. 4  | 618 | 0. 40643 | 5. 414978027 | 1  |
| MSTRG. 539. 1  | 86  | 0. 29615 | 8. 950378418 | 1  |
| MSTRG. 570. 1  | 668 | 0. 4502  | 6. 054626465 | 1  |
| MSTRG. 570. 15 | 668 | 0. 30595 | 6. 054626465 | 1  |
| MSTRG. 570. 14 | 741 | 0. 36618 | 6. 100280762 | 1  |
| MSTRG. 570. 16 | 741 | 0. 33465 | 6. 100280762 | 1  |
| MSTRG. 570. 18 | 741 | 0. 34583 | 6. 100280762 | 1  |
| MSTRG. 570. 17 | 741 | 0. 36466 | 6. 100280762 | 1  |
| MSTRG. 570. 19 | 741 | 0. 37265 | 6. 100280762 | 1  |
| MSTRG. 570. 20 | 668 | 0. 36893 | 6. 054626465 | 1  |
| MSTRG. 570. 22 | 741 | 0. 30595 | 6. 100280762 | 1  |
| MSTRG. 570. 21 | 668 | 0. 34156 | 6. 054626465 | 1  |
| MSTRG. 570. 23 | 668 | 0. 34583 | 6. 054626465 | 1  |
| MSTRG. 571. 1  | 189 | 0. 3767  | 9. 272155762 | -1 |
| MSTRG. 572. 1  | 146 | 0. 29135 | 9. 074035645 | 1  |
| MSTRG. 570. 24 | 90  | 0. 29543 | 7. 11541748  | 1  |
| MSTRG. 573. 1  | 31  | 0. 25049 | 6. 685852051 | 1  |
| MSTRG. 574. 1  | 77  | 0. 28819 | 9. 772888184 | -1 |
| MSTRG. 575. 1  | 43  | 0. 36347 | 9. 49810791  | 1  |
| MSTRG. 576. 1  | 73  | 0. 31997 | 9. 456359863 | 1  |
| MSTRG. 577. 1  | 96  | 0. 30513 | 10. 59991455 | 1  |
| MSTRG. 578. 1  | 132 | 0. 2921  | 8. 463562012 | 1  |
| MSTRG. 570. 25 | 48  | 0. 33414 | 11. 00006104 | 1  |
| MSTRG. 579. 1  | 148 | 0. 30576 | 10. 79571533 | 1  |
| MSTRG. 580. 1  | 233 | 0. 32389 | 9. 083679199 | -1 |
| MSTRG. 581. 1  | 128 | 0. 27289 | 9. 783996582 | 1  |
| MSTRG. 582. 1  | 120 | 0. 2895  | 9. 120666504 | 1  |
| MSTRG. 583. 1  | 107 | 0. 4019  | 9. 183410645 | -1 |
| MSTRG. 584. 1  | 45  | 0. 33659 | 4. 414611816 | 1  |
| MSTRG. 546. 1  | 155 | 0. 46333 | 13. 13702393 | 1  |
| MSTRG. 546. 2  | 235 | 0. 44993 | 4. 574523926 | 1  |
| MSTRG. 547. 1  | 309 | 0. 44983 | 5. 846252441 | -1 |
| MSTRG. 560. 4  | 329 | 0. 33214 | 7. 695129395 | 1  |
| MSTRG. 560. 1  | 261 | 0. 30829 | 7. 63470459  | 1  |
| MSTRG. 560. 6  | 329 | 0. 38555 | 7. 695129395 | 1  |
| MSTRG. 561. 1  | 124 | 0. 30276 | 7. 061340332 | -1 |
| MSTRG. 562. 1  | 71  | 0. 31732 | 4. 681945801 | 1  |
| MSTRG. 564. 1  | 39  | 0. 29607 | 9. 428894043 | 1  |
| MSTRG. 601. 2  | 361 | 0. 41625 | 8. 960510254 | 1  |
| MSTRG. 615. 6  | 319 | 0. 43895 | 8. 094543457 | 1  |
| MSTRG. 615. 4  | 319 | 0. 44166 | 8. 094543457 | 1  |
| MSTRG. 615. 5  | 400 | 0. 48358 | 8. 750793457 | 1  |
| MSTRG. 616. 1  | 64  | 0. 3173  | 9. 742370605 | 1  |
| MSTRG. 617. 1  | 73  | 0. 35997 | 8. 504089355 | 1  |
| MSTRG. 622. 2  | 208 | 0. 2921  | 6. 577575684 | 1  |

|                |      |          |              |    |
|----------------|------|----------|--------------|----|
| MSTRG. 622. 3  | 208  | 0. 28165 | 6. 577575684 | 1  |
| MSTRG. 622. 4  | 163  | 0. 2921  | 8. 125305176 | 1  |
| MSTRG. 623. 1  | 161  | 0. 31425 | 8. 549987793 | 1  |
| MSTRG. 624. 2  | 306  | 0. 34351 | 5. 458190918 | 1  |
| MSTRG. 624. 3  | 306  | 0. 34351 | 5. 458190918 | 1  |
| MSTRG. 625. 1  | 66   | 0. 32811 | 9. 63861084  | 1  |
| MSTRG. 627. 1  | 65   | 0. 35515 | 9. 817443848 | 1  |
| MSTRG. 628. 1  | 439  | 0. 47499 | 4. 695373535 | 1  |
| MSTRG. 628. 2  | 438  | 0. 46043 | 4. 706481934 | 1  |
| MSTRG. 628. 3  | 439  | 0. 46364 | 4. 695373535 | 1  |
| MSTRG. 628. 6  | 438  | 0. 46311 | 4. 706481934 | 1  |
| MSTRG. 628. 5  | 438  | 0. 47423 | 4. 706481934 | 1  |
| MSTRG. 639. 1  | 79   | 0. 30593 | 10. 68621826 | 1  |
| MSTRG. 639. 2  | 103  | 0. 27517 | 7. 626525879 | 1  |
| MSTRG. 645. 1  | 102  | 0. 31553 | 9. 388244629 | 1  |
| MSTRG. 646. 1  | 2416 | 0. 46809 | 6. 606872559 | 1  |
| MSTRG. 646. 3  | 169  | 0. 32417 | 10. 19232178 | 1  |
| MSTRG. 646. 4  | 191  | 0. 29793 | 8. 731994629 | 1  |
| MSTRG. 633. 4  | 519  | 0. 42152 | 9. 567199707 | 1  |
| MSTRG. 633. 5  | 598  | 0. 44277 | 9. 43548584  | 1  |
| MSTRG. 633. 6  | 598  | 0. 44277 | 9. 43548584  | 1  |
| MSTRG. 633. 7  | 519  | 0. 42792 | 9. 567199707 | 1  |
| MSTRG. 635. 1  | 31   | 0. 40674 | 4. 054992676 | 1  |
| MSTRG. 635. 2  | 27   | 0. 39663 | 5. 059875488 | 1  |
| MSTRG. 650. 1  | 337  | 0. 2921  | 4. 809143066 | 1  |
| MSTRG. 665. 2  | 100  | 0. 31281 | 10. 02423096 | 1  |
| MSTRG. 665. 3  | 53   | 0. 32061 | 7. 928161621 | 1  |
| MSTRG. 671. 6  | 1081 | 0. 47526 | 5. 653137207 | 1  |
| MSTRG. 671. 9  | 489  | 0. 44581 | 4. 707946777 | 1  |
| MSTRG. 671. 10 | 1165 | 0. 4637  | 6. 038024902 | 1  |
| MSTRG. 671. 12 | 1165 | 0. 4637  | 6. 038024902 | 1  |
| MSTRG. 671. 15 | 1153 | 0. 4637  | 5. 972717285 | 1  |
| MSTRG. 671. 16 | 1153 | 0. 4637  | 5. 972717285 | 1  |
| MSTRG. 671. 18 | 256  | 0. 37886 | 8. 882751465 | 1  |
| MSTRG. 672. 1  | 431  | 0. 32121 | 8. 380065918 | 1  |
| MSTRG. 667. 3  | 516  | 0. 43437 | 8. 685974121 | 1  |
| MSTRG. 691. 1  | 2380 | 0. 45015 | 5. 735290527 | 1  |
| MSTRG. 691. 2  | 2389 | 0. 45015 | 5. 74420166  | 1  |
| MSTRG. 691. 5  | 1650 | 0. 46286 | 5. 72454834  | 1  |
| MSTRG. 691. 6  | 1641 | 0. 46438 | 5. 713195801 | 1  |
| MSTRG. 691. 3  | 2964 | 0. 46681 | 5. 71282959  | 1  |
| MSTRG. 691. 7  | 26   | 0. 3954  | 5. 221862793 | -1 |
| MSTRG. 691. 8  | 2383 | 0. 46521 | 5. 623962402 | 1  |
| MSTRG. 691. 9  | 248  | 0. 28584 | 10. 2164917  | 1  |
| MSTRG. 691. 10 | 2281 | 0. 46708 | 5. 65045166  | 1  |
| MSTRG. 691. 11 | 2384 | 0. 45177 | 5. 637145996 | 1  |
| MSTRG. 691. 12 | 61   | 0. 36041 | 9. 812805176 | 1  |
| MSTRG. 693. 1  | 74   | 0. 29452 | 8. 636535645 | 1  |
| MSTRG. 694. 1  | 103  | 0. 32858 | 9. 779724121 | 1  |
| MSTRG. 691. 13 | 2381 | 0. 4749  | 5. 623962402 | -1 |
| MSTRG. 691. 14 | 2289 | 0. 44746 | 5. 646057129 | 1  |
| MSTRG. 691. 15 | 2282 | 0. 45696 | 5. 663391113 | 1  |
| MSTRG. 691. 17 | 1748 | 0. 3387  | 5. 508361816 | 1  |
| MSTRG. 691. 18 | 230  | 0. 31958 | 8. 908874512 | 1  |

|                |      |          |              |   |
|----------------|------|----------|--------------|---|
| MSTRG. 695. 1  | 81   | 0. 29607 | 8. 736755371 | 1 |
| MSTRG. 691. 21 | 146  | 0. 27911 | 8. 557678223 | 1 |
| MSTRG. 691. 20 | 743  | 0. 40193 | 5. 987365723 | 1 |
| MSTRG. 691. 22 | 846  | 0. 41457 | 5. 862976074 | 1 |
| MSTRG. 696. 1  | 180  | 0. 28199 | 9. 745178223 | 1 |
| MSTRG. 675. 2  | 1343 | 0. 33435 | 5. 528503418 | 1 |
| MSTRG. 681. 5  | 794  | 0. 47505 | 6. 031311035 | 1 |
| MSTRG. 681. 4  | 794  | 0. 46937 | 6. 031311035 | 1 |
| MSTRG. 684. 1  | 403  | 0. 45484 | 6. 352478027 | 1 |
| MSTRG. 684. 4  | 433  | 0. 48119 | 5. 894714355 | 1 |
| MSTRG. 699. 1  | 693  | 0. 42257 | 7. 237731934 | 1 |
| MSTRG. 699. 3  | 692  | 0. 3825  | 7. 237731934 | 1 |
| MSTRG. 699. 4  | 735  | 0. 41881 | 7. 644226074 | 1 |
| MSTRG. 702. 1  | 110  | 0. 3638  | 11. 06561279 | 1 |
| MSTRG. 704. 4  | 232  | 0. 33698 | 8. 985778809 | 1 |
| MSTRG. 704. 6  | 73   | 0. 30419 | 9. 339660645 | 1 |
| MSTRG. 704. 7  | 209  | 0. 30191 | 10. 69903564 | 1 |
| MSTRG. 685. 2  | 251  | 0. 27639 | 11. 86846924 | 1 |
| MSTRG. 685. 1  | 251  | 0. 31158 | 11. 86846924 | 1 |
| MSTRG. 685. 3  | 251  | 0. 30501 | 11. 86846924 | 1 |
| MSTRG. 687. 5  | 752  | 0. 29976 | 5. 675476074 | 1 |
| MSTRG. 687. 6  | 286  | 0. 35139 | 6. 241760254 | 1 |
| MSTRG. 705. 6  | 633  | 0. 32865 | 8. 004943848 | 1 |
| MSTRG. 705. 3  | 1007 | 0. 4491  | 6. 965881348 | 1 |
| MSTRG. 705. 4  | 1054 | 0. 34885 | 7. 155700684 | 1 |
| MSTRG. 705. 5  | 980  | 0. 39057 | 7. 320129395 | 1 |
| MSTRG. 705. 1  | 1039 | 0. 39737 | 6. 992004395 | 1 |
| MSTRG. 705. 7  | 1054 | 0. 38809 | 7. 155700684 | 1 |
| MSTRG. 705. 8  | 1039 | 0. 39489 | 6. 992004395 | 1 |
| MSTRG. 706. 3  | 769  | 0. 4216  | 5. 954528809 | 1 |
| MSTRG. 706. 4  | 133  | 0. 28267 | 9. 186950684 | 1 |
| MSTRG. 707. 1  | 52   | 0. 30265 | 6. 81439209  | 1 |
| MSTRG. 708. 1  | 367  | 0. 3462  | 6. 820251465 | 1 |
| MSTRG. 708. 5  | 321  | 0. 34706 | 6. 481140137 | 1 |
| MSTRG. 708. 4  | 384  | 0. 44423 | 7. 156921387 | 1 |
| MSTRG. 708. 3  | 321  | 0. 47081 | 6. 481140137 | 1 |
| MSTRG. 710. 3  | 258  | 0. 3208  | 5. 284240723 | 1 |
| MSTRG. 713. 3  | 358  | 0. 45098 | 6. 363342285 | 1 |
| MSTRG. 714. 1  | 107  | 0. 37175 | 4. 749816895 | 1 |
| MSTRG. 714. 2  | 107  | 0. 3638  | 4. 749816895 | 1 |
| MSTRG. 715. 1  | 150  | 0. 29059 | 6. 270324707 | 1 |
| MSTRG. 717. 1  | 33   | 0. 36569 | 9. 102355957 | 1 |
| MSTRG. 718. 1  | 55   | 0. 28862 | 7. 868835449 | 1 |
| MSTRG. 730. 7  | 533  | 0. 46866 | 5. 51763916  | 1 |
| MSTRG. 731. 1  | 44   | 0. 41275 | 7. 944641113 | 1 |
| MSTRG. 732. 1  | 183  | 0. 26969 | 11. 35992432 | 1 |
| MSTRG. 733. 1  | 72   | 0. 41181 | 3. 616638184 | 1 |
| MSTRG. 727. 2  | 344  | 0. 4676  | 8. 890563965 | 1 |
| MSTRG. 727. 3  | 344  | 0. 43714 | 8. 890563965 | 1 |
| MSTRG. 727. 4  | 344  | 0. 43838 | 8. 890563965 | 1 |
| MSTRG. 728. 1  | 52   | 0. 35089 | 7. 960266113 | 1 |
| MSTRG. 728. 2  | 52   | 0. 32779 | 7. 960266113 | 1 |
| MSTRG. 728. 3  | 52   | 0. 32603 | 7. 960266113 | 1 |
| MSTRG. 735. 1  | 85   | 0. 33282 | 4. 855285645 | 1 |

|               |      |          |              |    |
|---------------|------|----------|--------------|----|
| MSTRG. 739. 1 | 60   | 0. 3     | 9. 493103027 | 1  |
| MSTRG. 740. 1 | 75   | 0. 29594 | 6. 86895752  | 1  |
| MSTRG. 741. 1 | 188  | 0. 3046  | 10. 64141846 | 1  |
| MSTRG. 743. 2 | 216  | 0. 44441 | 9. 651306152 | 1  |
| MSTRG. 752. 5 | 160  | 0. 4253  | 5. 147766113 | 1  |
| MSTRG. 752. 6 | 160  | 0. 41509 | 5. 147766113 | 1  |
| MSTRG. 755. 1 | 47   | 0. 41138 | 8. 493225098 | 1  |
| MSTRG. 756. 1 | 123  | 0. 29859 | 6. 567443848 | 1  |
| MSTRG. 758. 1 | 88   | 0. 28923 | 10. 8961792  | 1  |
| MSTRG. 774. 1 | 170  | 0. 32237 | 10. 23602295 | 1  |
| MSTRG. 776. 1 | 95   | 0. 32237 | 9. 162658691 | 1  |
| MSTRG. 777. 1 | 63   | 0. 31544 | 9. 340393066 | 1  |
| MSTRG. 770. 1 | 100  | 0. 39032 | 6. 039367676 | -1 |
| MSTRG. 771. 1 | 32   | 0. 38859 | 9. 894104004 | 1  |
| MSTRG. 771. 2 | 16   | 0. 46451 | 5. 897644043 | 1  |
| MSTRG. 778. 1 | 39   | 0. 44532 | 5. 934753418 | 1  |
| MSTRG. 782. 2 | 451  | 0. 28982 | 7. 416442871 | 1  |
| MSTRG. 782. 3 | 614  | 0. 28298 | 7. 443054199 | 1  |
| MSTRG. 782. 4 | 451  | 0. 41114 | 7. 416442871 | 1  |
| MSTRG. 782. 5 | 614  | 0. 41539 | 7. 443054199 | 1  |
| MSTRG. 784. 1 | 557  | 0. 40005 | 9. 76385498  | -1 |
| MSTRG. 784. 2 | 534  | 0. 37862 | 9. 744934082 | 1  |
| MSTRG. 786. 1 | 182  | 0. 37294 | 6. 895324707 | 1  |
| MSTRG. 794. 2 | 124  | 0. 38335 | 9. 14263916  | 1  |
| MSTRG. 803. 3 | 358  | 0. 42046 | 5. 920959473 | 1  |
| MSTRG. 804. 1 | 55   | 0. 29244 | 8. 801330566 | 1  |
| MSTRG. 804. 2 | 19   | 0. 37487 | 11. 71136475 | 1  |
| MSTRG. 805. 1 | 170  | 0. 40183 | 7. 625793457 | 1  |
| MSTRG. 806. 1 | 557  | 0. 41355 | 9. 036315918 | 1  |
| MSTRG. 806. 4 | 178  | 0. 39627 | 6. 382995605 | 1  |
| MSTRG. 801. 1 | 68   | 0. 41736 | 8. 508605957 | -1 |
| MSTRG. 813. 2 | 589  | 0. 29691 | 9. 571472168 | 1  |
| MSTRG. 817. 1 | 595  | 0. 33187 | 6. 727111816 | 1  |
| MSTRG. 831. 2 | 1426 | 0. 45968 | 5. 414245605 | 1  |
| MSTRG. 831. 4 | 1152 | 0. 47815 | 5. 806335449 | 1  |
| MSTRG. 833. 1 | 58   | 0. 41473 | 9. 034851074 | -1 |
| MSTRG. 835. 1 | 192  | 0. 28033 | 4. 813049316 | 1  |
| MSTRG. 836. 2 | 485  | 0. 41067 | 9. 120666504 | 1  |
| MSTRG. 837. 4 | 1312 | 0. 4525  | 5. 175109863 | 1  |
| MSTRG. 839. 2 | 159  | 0. 36592 | 6. 426452637 | 1  |
| MSTRG. 840. 3 | 364  | 0. 43303 | 9. 522155762 | 1  |
| MSTRG. 840. 2 | 482  | 0. 40185 | 9. 373718262 | 1  |
| MSTRG. 841. 3 | 1247 | 0. 40062 | 6. 034118652 | 1  |
| MSTRG. 841. 2 | 1247 | 0. 37065 | 6. 034118652 | 1  |
| MSTRG. 854. 3 | 682  | 0. 43688 | 7. 598327637 | 1  |
| MSTRG. 855. 1 | 377  | 0. 32179 | 9. 790710449 | 1  |
| MSTRG. 855. 2 | 188  | 0. 30092 | 9. 571838379 | 1  |
| MSTRG. 848. 3 | 600  | 0. 32771 | 6. 024597168 | 1  |
| MSTRG. 848. 5 | 600  | 0. 37826 | 6. 024597168 | 1  |
| MSTRG. 848. 6 | 600  | 0. 45266 | 6. 024597168 | 1  |
| MSTRG. 848. 8 | 600  | 0. 45688 | 6. 024597168 | 1  |
| MSTRG. 859. 4 | 176  | 0. 33379 | 6. 37677002  | 1  |
| MSTRG. 859. 6 | 62   | 0. 3127  | 6. 157165527 | 1  |
| MSTRG. 862. 2 | 1098 | 0. 4129  | 6. 146911621 | 1  |

|                |      |          |              |    |
|----------------|------|----------|--------------|----|
| MSTRG. 862. 5  | 58   | 0. 4178  | 5. 562683105 | 1  |
| MSTRG. 862. 7  | 58   | 0. 31444 | 5. 562683105 | 1  |
| MSTRG. 862. 6  | 914  | 0. 46623 | 6. 296813965 | 1  |
| MSTRG. 862. 3  | 1089 | 0. 47345 | 6. 308776855 | 1  |
| MSTRG. 862. 8  | 293  | 0. 41594 | 8. 67755127  | 1  |
| MSTRG. 874. 1  | 68   | 0. 36296 | 4. 450866699 | 1  |
| MSTRG. 892. 3  | 569  | 0. 36948 | 5. 213806152 | 1  |
| MSTRG. 892. 2  | 569  | 0. 34386 | 5. 213806152 | 1  |
| MSTRG. 892. 1  | 863  | 0. 37645 | 5. 361999512 | 1  |
| MSTRG. 897. 2  | 136  | 0. 29844 | 8. 97052002  | 1  |
| MSTRG. 914. 4  | 267  | 0. 37873 | 8. 567443848 | 1  |
| MSTRG. 914. 3  | 378  | 0. 38378 | 9. 805480957 | 1  |
| MSTRG. 914. 5  | 309  | 0. 39923 | 9. 95513916  | 1  |
| MSTRG. 915. 2  | 577  | 0. 41362 | 4. 975891113 | 1  |
| MSTRG. 915. 3  | 577  | 0. 41362 | 4. 975891113 | 1  |
| MSTRG. 908. 1  | 39   | 0. 43484 | 5. 939025879 | -1 |
| MSTRG. 920. 1  | 89   | 0. 28066 | 4. 514099121 | 1  |
| MSTRG. 921. 1  | 51   | 0. 42563 | 8. 90838623  | -1 |
| MSTRG. 945. 1  | 137  | 0. 47449 | 5. 780212402 | 1  |
| MSTRG. 934. 4  | 306  | 0. 36827 | 8. 300964355 | 1  |
| MSTRG. 951. 3  | 896  | 0. 45027 | 7. 522521973 | 1  |
| MSTRG. 952. 1  | 94   | 0. 41656 | 9. 513244629 | -1 |
| MSTRG. 956. 4  | 465  | 0. 37823 | 6. 826721191 | 1  |
| MSTRG. 957. 1  | 127  | 0. 28478 | 10. 97186279 | 1  |
| MSTRG. 959. 1  | 138  | 0. 3508  | 7. 150939941 | 1  |
| MSTRG. 965. 1  | 74   | 0. 29988 | 9. 09967041  | 1  |
| MSTRG. 965. 2  | 59   | 0. 30008 | 6. 69354248  | 1  |
| MSTRG. 965. 3  | 53   | 0. 37379 | 5. 108093262 | 1  |
| MSTRG. 979. 3  | 1074 | 0. 34314 | 8. 908508301 | 1  |
| MSTRG. 979. 7  | 156  | 0. 3119  | 4. 898498535 | 1  |
| MSTRG. 980. 3  | 131  | 0. 27678 | 11. 59063721 | 1  |
| MSTRG. 981. 1  | 109  | 0. 29772 | 5. 004333496 | 1  |
| MSTRG. 980. 5  | 118  | 0. 28982 | 9. 809875488 | 1  |
| MSTRG. 980. 6  | 124  | 0. 28982 | 9. 028625488 | 1  |
| MSTRG. 980. 7  | 1317 | 0. 3926  | 7. 024475098 | 1  |
| MSTRG. 985. 1  | 60   | 0. 35363 | 9. 485168457 | 1  |
| MSTRG. 967. 2  | 160  | 0. 33654 | 6. 518127441 | 1  |
| MSTRG. 972. 2  | 64   | 0. 31343 | 7. 888000488 | 1  |
| MSTRG. 974. 1  | 543  | 0. 44936 | 4. 831726074 | 1  |
| MSTRG. 975. 1  | 70   | 0. 36279 | 9. 593688965 | 1  |
| MSTRG. 991. 1  | 71   | 0. 3637  | 9. 570983887 | 1  |
| MSTRG. 991. 2  | 71   | 0. 32234 | 9. 570983887 | 1  |
| MSTRG. 991. 3  | 71   | 0. 36923 | 9. 570983887 | 1  |
| MSTRG. 994. 1  | 551  | 0. 4674  | 7. 88079834  | -1 |
| MSTRG. 994. 2  | 544  | 0. 46798 | 6. 969787598 | -1 |
| MSTRG. 994. 3  | 537  | 0. 49355 | 6. 616882324 | -1 |
| MSTRG. 997. 1  | 609  | 0. 35732 | 8. 673522949 | 1  |
| MSTRG. 1000. 1 | 1051 | 0. 42576 | 6. 28326416  | 1  |
| MSTRG. 1000. 2 | 1039 | 0. 44116 | 6. 366760254 | 1  |
| MSTRG. 1005. 5 | 125  | 0. 32082 | 11. 91070557 | 1  |
| MSTRG. 1005. 6 | 548  | 0. 47775 | 4. 540710449 | 1  |
| MSTRG. 1002. 3 | 280  | 0. 37298 | 8. 820861816 | 1  |
| MSTRG. 1002. 4 | 267  | 0. 35248 | 8. 702453613 | 1  |
| MSTRG. 1008. 4 | 195  | 0. 46323 | 6. 041564941 | 1  |

|                 |     |          |              |    |
|-----------------|-----|----------|--------------|----|
| MSTRG. 1013. 4  | 837 | 0. 45138 | 5. 289855957 | 1  |
| MSTRG. 1013. 7  | 721 | 0. 47498 | 4. 960510254 | 1  |
| MSTRG. 1013. 8  | 720 | 0. 47498 | 4. 960510254 | 1  |
| MSTRG. 1013. 9  | 252 | 0. 33    | 7. 982727051 | 1  |
| MSTRG. 1012. 2  | 128 | 0. 31169 | 6. 241149902 | 1  |
| MSTRG. 1012. 1  | 128 | 0. 32887 | 6. 241149902 | 1  |
| MSTRG. 1029. 1  | 503 | 0. 46928 | 7. 208679199 | 1  |
| MSTRG. 1029. 3  | 383 | 0. 39463 | 5. 975280762 | 1  |
| MSTRG. 1031. 1  | 360 | 0. 32661 | 5. 57635498  | 1  |
| MSTRG. 1031. 2  | 360 | 0. 31588 | 5. 57635498  | 1  |
| MSTRG. 1031. 3  | 192 | 0. 34642 | 5. 195373535 | 1  |
| MSTRG. 1041. 2  | 264 | 0. 39192 | 6. 41192627  | 1  |
| MSTRG. 1044. 3  | 640 | 0. 43473 | 8. 186706543 | 1  |
| MSTRG. 1036. 3  | 512 | 0. 35998 | 5. 446350098 | 1  |
| MSTRG. 1037. 1  | 101 | 0. 36873 | 8. 59942627  | 1  |
| MSTRG. 1060. 2  | 130 | 0. 35813 | 5. 903991699 | 1  |
| MSTRG. 1063. 1  | 222 | 0. 43782 | 5. 299743652 | 1  |
| MSTRG. 1063. 2  | 222 | 0. 44602 | 5. 299743652 | 1  |
| MSTRG. 1066. 1  | 334 | 0. 45541 | 11. 08001709 | 1  |
| MSTRG. 1066. 2  | 334 | 0. 42556 | 11. 08001709 | 1  |
| MSTRG. 1066. 3  | 158 | 0. 42583 | 11. 95782471 | 1  |
| MSTRG. 1065. 1  | 28  | 0. 36272 | 7. 975280762 | -1 |
| MSTRG. 1070. 1  | 71  | 0. 4494  | 4. 82623291  | -1 |
| MSTRG. 1085. 2  | 188 | 0. 32257 | 10. 11651611 | 1  |
| MSTRG. 1086. 2  | 352 | 0. 4184  | 9. 405944824 | 1  |
| MSTRG. 1096. 1  | 744 | 0. 46663 | 6. 718322754 | 1  |
| MSTRG. 1097. 1  | 43  | 0. 34287 | 6. 792663574 | 1  |
| MSTRG. 1096. 2  | 699 | 0. 3723  | 6. 446838379 | 1  |
| MSTRG. 1108. 1  | 30  | 0. 39577 | 9. 52130127  | 1  |
| MSTRG. 1119. 1  | 177 | 0. 28992 | 9. 833679199 | 1  |
| MSTRG. 1132. 1  | 228 | 0. 28958 | 9. 857116699 | 1  |
| MSTRG. 1125. 1  | 283 | 0. 34356 | 9. 096496582 | 1  |
| MSTRG. 1141. 1  | 104 | 0. 33358 | 6. 011169434 | 1  |
| MSTRG. 1149. 1  | 79  | 0. 37847 | 9. 73248291  | 1  |
| MSTRG. 1150. 1  | 85  | 0. 41682 | 5. 994567871 | 1  |
| MSTRG. 1157. 6  | 347 | 0. 32389 | 9. 062927246 | 1  |
| MSTRG. 1157. 7  | 295 | 0. 28562 | 9. 052185059 | 1  |
| MSTRG. 1157. 8  | 277 | 0. 41275 | 8. 929748535 | 1  |
| MSTRG. 1157. 10 | 384 | 0. 39677 | 8. 923278809 | 1  |
| MSTRG. 1157. 9  | 387 | 0. 4219  | 9. 161437988 | 1  |
| MSTRG. 1158. 1  | 51  | 0. 30651 | 10. 168396   | 1  |
| MSTRG. 1158. 2  | 51  | 0. 26982 | 10. 32086182 | 1  |
| MSTRG. 1159. 1  | 94  | 0. 28576 | 5. 378967285 | 1  |
| MSTRG. 1173. 1  | 117 | 0. 30824 | 10. 30865479 | 1  |
| MSTRG. 1174. 1  | 103 | 0. 35999 | 10. 16790771 | -1 |
| MSTRG. 1175. 1  | 210 | 0. 29387 | 9. 206848145 | 1  |
| MSTRG. 1161. 2  | 232 | 0. 35128 | 6. 616027832 | 1  |
| MSTRG. 1161. 3  | 80  | 0. 28567 | 7. 805969238 | 1  |
| MSTRG. 1164. 2  | 76  | 0. 33639 | 6. 360656738 | 1  |
| MSTRG. 1167. 1  | 47  | 0. 46486 | 5. 221008301 | -1 |
| MSTRG. 1184. 1  | 101 | 0. 30611 | 10. 79107666 | 1  |
| MSTRG. 1189. 2  | 149 | 0. 43199 | 6. 640197754 | 1  |
| MSTRG. 1190. 1  | 28  | 0. 42464 | 5. 713684082 | 1  |
| MSTRG. 1194. 2  | 80  | 0. 33953 | 9. 137756348 | 1  |

|                 |      |          |              |    |
|-----------------|------|----------|--------------|----|
| MSTRG. 1196. 2  | 287  | 0. 33115 | 4. 906311035 | 1  |
| MSTRG. 1207. 1  | 33   | 0. 39879 | 10. 43267822 | 1  |
| MSTRG. 1209. 1  | 60   | 0. 4013  | 9. 514221191 | -1 |
| MSTRG. 1214. 2  | 103  | 0. 36906 | 8. 078796387 | 1  |
| MSTRG. 1215. 1  | 182  | 0. 3122  | 9. 927307129 | 1  |
| MSTRG. 1211. 1  | 23   | 0. 44884 | 8. 000305176 | 1  |
| MSTRG. 1236. 4  | 199  | 0. 33577 | 10. 2868042  | 1  |
| MSTRG. 1245. 2  | 696  | 0. 41602 | 9. 074523926 | -1 |
| MSTRG. 1250. 2  | 191  | 0. 34787 | 6. 101013184 | 1  |
| MSTRG. 1251. 1  | 96   | 0. 38338 | 10. 26959229 | 1  |
| MSTRG. 1252. 4  | 295  | 0. 46276 | 9. 412536621 | 1  |
| MSTRG. 1253. 1  | 128  | 0. 44172 | 10. 82330322 | -1 |
| MSTRG. 1259. 2  | 123  | 0. 41444 | 8. 618591309 | 1  |
| MSTRG. 1260. 1  | 62   | 0. 33362 | 7. 776672363 | 1  |
| MSTRG. 1261. 2  | 161  | 0. 37709 | 9. 390808105 | 1  |
| MSTRG. 1261. 5  | 386  | 0. 43928 | 5. 488098145 | 1  |
| MSTRG. 1261. 6  | 189  | 0. 43023 | 9. 56072998  | 1  |
| MSTRG. 1254. 1  | 45   | 0. 32386 | 5. 376525879 | 1  |
| MSTRG. 1263. 1  | 790  | 0. 43132 | 7. 009460449 | 1  |
| MSTRG. 1267. 4  | 480  | 0. 36081 | 9. 171691895 | 1  |
| MSTRG. 1269. 1  | 125  | 0. 36883 | 7. 65447998  | -1 |
| MSTRG. 1272. 1  | 154  | 0. 28165 | 6. 308166504 | 1  |
| MSTRG. 1272. 4  | 154  | 0. 33754 | 6. 308166504 | 1  |
| MSTRG. 1272. 6  | 154  | 0. 36841 | 6. 308166504 | 1  |
| MSTRG. 1272. 7  | 154  | 0. 27863 | 6. 308166504 | 1  |
| MSTRG. 1278. 2  | 134  | 0. 37415 | 5. 278625488 | 1  |
| MSTRG. 1278. 3  | 182  | 0. 30829 | 9. 909362793 | 1  |
| MSTRG. 1279. 2  | 522  | 0. 40397 | 6. 787414551 | 1  |
| MSTRG. 1288. 3  | 1070 | 0. 47624 | 6. 506652832 | 1  |
| MSTRG. 1288. 4  | 235  | 0. 35956 | 7. 002502441 | 1  |
| MSTRG. 1288. 5  | 235  | 0. 35415 | 7. 002502441 | 1  |
| MSTRG. 1285. 1  | 108  | 0. 35621 | 10. 15289307 | 1  |
| MSTRG. 1309. 1  | 82   | 0. 31027 | 9. 51763916  | 1  |
| MSTRG. 1310. 2  | 65   | 0. 28167 | 8. 636047363 | 1  |
| MSTRG. 1310. 1  | 43   | 0. 36931 | 11. 88482666 | 1  |
| MSTRG. 1310. 3  | 38   | 0. 46918 | 11. 88482666 | 1  |
| MSTRG. 1311. 1  | 377  | 0. 31852 | 6. 230895996 | 1  |
| MSTRG. 1311. 7  | 377  | 0. 34899 | 6. 230895996 | 1  |
| MSTRG. 1311. 5  | 377  | 0. 37681 | 6. 230895996 | 1  |
| MSTRG. 1311. 6  | 377  | 0. 37681 | 6. 230895996 | 1  |
| MSTRG. 1311. 8  | 377  | 0. 33321 | 6. 230895996 | 1  |
| MSTRG. 1311. 9  | 377  | 0. 36981 | 6. 230895996 | 1  |
| MSTRG. 1311. 10 | 377  | 0. 42985 | 6. 230895996 | 1  |
| MSTRG. 1309. 2  | 82   | 0. 3708  | 9. 51763916  | 1  |
| MSTRG. 1312. 1  | 142  | 0. 36042 | 10. 54095459 | 1  |
| MSTRG. 1314. 2  | 411  | 0. 47887 | 6. 600036621 | 1  |
| MSTRG. 1317. 1  | 151  | 0. 34041 | 10. 23260498 | 1  |
| MSTRG. 1318. 2  | 531  | 0. 4688  | 5. 473083496 | 1  |
| MSTRG. 1318. 3  | 785  | 0. 45349 | 5. 805358887 | 1  |
| MSTRG. 1319. 1  | 79   | 0. 28385 | 6. 520080566 | 1  |
| MSTRG. 1320. 1  | 179  | 0. 33921 | 9. 215270996 | 1  |
| MSTRG. 1321. 1  | 182  | 0. 40856 | 11. 20367432 | 1  |
| MSTRG. 1323. 1  | 189  | 0. 28301 | 9. 344421387 | 1  |
| MSTRG. 1318. 4  | 144  | 0. 31209 | 7. 63861084  | 1  |



|                 |      |          |              |   |
|-----------------|------|----------|--------------|---|
| MSTRG. 1325. 1  | 541  | 0. 39981 | 6. 10760498  | 1 |
| MSTRG. 1332. 2  | 431  | 0. 29088 | 6. 020446777 | 1 |
| MSTRG. 1338. 1  | 808  | 0. 45629 | 6. 106384277 | 1 |
| MSTRG. 1338. 2  | 723  | 0. 47985 | 5. 911682129 | 1 |
| MSTRG. 1338. 4  | 723  | 0. 47271 | 5. 911682129 | 1 |
| MSTRG. 1338. 3  | 766  | 0. 50874 | 6. 227233887 | 1 |
| MSTRG. 1338. 7  | 356  | 0. 43422 | 6. 134094238 | 1 |
| MSTRG. 1338. 8  | 280  | 0. 33743 | 6. 750061035 | 1 |
| MSTRG. 1339. 1  | 74   | 0. 33323 | 4. 038391113 | 1 |
| MSTRG. 1344. 2  | 175  | 0. 32687 | 4. 918518066 | 1 |
| MSTRG. 1346. 1  | 271  | 0. 35232 | 9. 462463379 | 1 |
| MSTRG. 1351. 5  | 1521 | 0. 49467 | 6. 01776123  | 1 |
| MSTRG. 1351. 6  | 1398 | 0. 46494 | 6. 094299316 | 1 |
| MSTRG. 1352. 6  | 209  | 0. 28243 | 5. 321228027 | 1 |
| MSTRG. 1352. 2  | 107  | 0. 30816 | 4. 880065918 | 1 |
| MSTRG. 1352. 4  | 167  | 0. 39607 | 4. 885925293 | 1 |
| MSTRG. 1352. 9  | 107  | 0. 29526 | 4. 880065918 | 1 |
| MSTRG. 1352. 11 | 67   | 0. 45858 | 9. 518249512 | 1 |
| MSTRG. 1352. 12 | 47   | 0. 37665 | 9. 989196777 | 1 |
| MSTRG. 1352. 10 | 107  | 0. 38751 | 4. 880065918 | 1 |
| MSTRG. 1352. 13 | 127  | 0. 4275  | 5. 02130127  | 1 |
| MSTRG. 1352. 14 | 107  | 0. 37665 | 4. 880065918 | 1 |
| MSTRG. 1352. 15 | 130  | 0. 41751 | 9. 79876709  | 1 |
| MSTRG. 1355. 4  | 583  | 0. 43333 | 8. 696350098 | 1 |
| MSTRG. 1363. 1  | 106  | 0. 3344  | 9. 751281738 | 1 |
| MSTRG. 1367. 2  | 136  | 0. 30981 | 9. 623596191 | 1 |
| MSTRG. 1367. 3  | 271  | 0. 33863 | 9. 367858887 | 1 |
| MSTRG. 1380. 9  | 77   | 0. 33011 | 7. 762878418 | 1 |
| MSTRG. 1380. 7  | 693  | 0. 46014 | 5. 59161377  | 1 |
| MSTRG. 1380. 5  | 842  | 0. 46721 | 6. 162414551 | 1 |
| MSTRG. 1380. 8  | 665  | 0. 46056 | 5. 933654785 | 1 |
| MSTRG. 1380. 10 | 166  | 0. 36566 | 5. 200378418 | 1 |
| MSTRG. 1380. 11 | 48   | 0. 26594 | 10. 01287842 | 1 |
| MSTRG. 1382. 1  | 116  | 0. 3018  | 9. 427429199 | 1 |
| MSTRG. 1384. 4  | 914  | 0. 4226  | 9. 548400879 | 1 |
| MSTRG. 1384. 3  | 2134 | 0. 44205 | 8. 780578613 | 1 |
| MSTRG. 1384. 5  | 59   | 0. 31637 | 9. 44708252  | 1 |
| MSTRG. 1387. 1  | 354  | 0. 46483 | 9. 333312988 | 1 |
| MSTRG. 1391. 1  | 270  | 0. 37988 | 9. 575378418 | 1 |
| MSTRG. 1395. 10 | 670  | 0. 46431 | 9. 493713379 | 1 |
| MSTRG. 1395. 11 | 670  | 0. 45395 | 9. 493713379 | 1 |
| MSTRG. 1395. 12 | 670  | 0. 44287 | 9. 493713379 | 1 |
| MSTRG. 1395. 13 | 719  | 0. 44791 | 9. 429016113 | 1 |
| MSTRG. 1395. 14 | 670  | 0. 45834 | 9. 493713379 | 1 |
| MSTRG. 1395. 15 | 670  | 0. 46266 | 9. 493713379 | 1 |
| MSTRG. 1395. 17 | 498  | 0. 3555  | 9. 648986816 | 1 |
| MSTRG. 1395. 18 | 719  | 0. 45243 | 9. 429016113 | 1 |
| MSTRG. 1395. 19 | 581  | 0. 45243 | 9. 511779785 | 1 |
| MSTRG. 1395. 20 | 498  | 0. 3555  | 9. 648986816 | 1 |
| MSTRG. 1395. 21 | 533  | 0. 43619 | 9. 420227051 | 1 |
| MSTRG. 1395. 22 | 533  | 0. 44625 | 9. 420227051 | 1 |
| MSTRG. 1395. 23 | 581  | 0. 45243 | 9. 511779785 | 1 |
| MSTRG. 1395. 24 | 581  | 0. 45395 | 9. 511779785 | 1 |
| MSTRG. 1396. 1  | 137  | 0. 34924 | 9. 472717285 | 1 |

|                |      |          |              |   |
|----------------|------|----------|--------------|---|
| MSTRG. 1396. 2 | 137  | 0. 37438 | 9. 472717285 | 1 |
| MSTRG. 1394. 1 | 17   | 0. 42277 | 6. 494689941 | 1 |
| MSTRG. 1398. 1 | 465  | 0. 46944 | 8. 91595459  | 1 |
| MSTRG. 1398. 2 | 234  | 0. 4082  | 5. 78338623  | 1 |
| MSTRG. 1407. 1 | 61   | 0. 32494 | 11. 253479   | 1 |
| MSTRG. 1408. 1 | 385  | 0. 42754 | 7. 049865723 | 1 |
| MSTRG. 1414. 3 | 139  | 0. 39345 | 5. 361877441 | 1 |
| MSTRG. 1415. 1 | 527  | 0. 37164 | 8. 403747559 | 1 |
| MSTRG. 1415. 3 | 533  | 0. 38953 | 8. 190246582 | 1 |
| MSTRG. 1416. 2 | 319  | 0. 45057 | 5. 274108887 | 1 |
| MSTRG. 1419. 4 | 74   | 0. 36321 | 9. 367858887 | 1 |
| MSTRG. 1419. 3 | 215  | 0. 43354 | 5. 492492676 | 1 |
| MSTRG. 1420. 1 | 109  | 0. 35473 | 7. 777648926 | 1 |
| MSTRG. 1421. 1 | 402  | 0. 41675 | 5. 269104004 | 1 |
| MSTRG. 1426. 2 | 778  | 0. 43946 | 7. 291320801 | 1 |
| MSTRG. 1432. 3 | 45   | 0. 40129 | 4. 305236816 | 1 |
| MSTRG. 1432. 2 | 133  | 0. 35614 | 9. 005554199 | 1 |
| MSTRG. 1433. 1 | 120  | 0. 34324 | 9. 436462402 | 1 |
| MSTRG. 1433. 5 | 676  | 0. 37858 | 9. 900085449 | 1 |
| MSTRG. 1429. 2 | 220  | 0. 33265 | 5. 803283691 | 1 |
| MSTRG. 1429. 3 | 308  | 0. 33485 | 6. 554138184 | 1 |
| MSTRG. 1428. 1 | 98   | 0. 4433  | 6. 279724121 | 1 |
| MSTRG. 1436. 1 | 376  | 0. 30736 | 9. 096252441 | 1 |
| MSTRG. 1436. 4 | 174  | 0. 29514 | 6. 465881348 | 1 |
| MSTRG. 1436. 2 | 376  | 0. 28426 | 9. 096252441 | 1 |
| MSTRG. 1436. 3 | 376  | 0. 28122 | 9. 096252441 | 1 |
| MSTRG. 1437. 1 | 85   | 0. 31605 | 9. 793151855 | 1 |
| MSTRG. 1438. 1 | 151  | 0. 27495 | 9. 722229004 | 1 |
| MSTRG. 1436. 7 | 376  | 0. 31604 | 9. 096252441 | 1 |
| MSTRG. 1436. 6 | 376  | 0. 30736 | 9. 096252441 | 1 |
| MSTRG. 1439. 2 | 754  | 0. 45694 | 5. 390563965 | 1 |
| MSTRG. 1440. 1 | 115  | 0. 30868 | 5. 378967285 | 1 |
| MSTRG. 1441. 1 | 285  | 0. 46537 | 9. 215515137 | 1 |
| MSTRG. 1447. 1 | 91   | 0. 30955 | 6. 232971191 | 1 |
| MSTRG. 1449. 1 | 522  | 0. 45468 | 8. 37322998  | 1 |
| MSTRG. 1450. 1 | 234  | 0. 39802 | 9. 016784668 | 1 |
| MSTRG. 1451. 2 | 145  | 0. 42045 | 8. 696716309 | 1 |
| MSTRG. 1451. 3 | 145  | 0. 42789 | 8. 696716309 | 1 |
| MSTRG. 1454. 5 | 137  | 0. 3071  | 4. 459533691 | 1 |
| MSTRG. 1455. 2 | 79   | 0. 33585 | 6. 796081543 | 1 |
| MSTRG. 1455. 1 | 78   | 0. 39483 | 5. 975769043 | 1 |
| MSTRG. 1460. 1 | 61   | 0. 36738 | 7. 640197754 | 1 |
| MSTRG. 1463. 2 | 345  | 0. 43258 | 9. 202453613 | 1 |
| MSTRG. 1464. 1 | 86   | 0. 35352 | 6. 870056152 | 1 |
| MSTRG. 1465. 2 | 214  | 0. 4133  | 6. 76348877  | 1 |
| MSTRG. 1467. 2 | 1330 | 0. 409   | 5. 598815918 | 1 |
| MSTRG. 1469. 1 | 516  | 0. 43382 | 9. 32244873  | 1 |
| MSTRG. 1470. 1 | 220  | 0. 36364 | 9. 839782715 | 1 |
| MSTRG. 1475. 3 | 108  | 0. 27678 | 7. 741638184 | 1 |
| MSTRG. 1475. 2 | 371  | 0. 42983 | 7. 67791748  | 1 |
| MSTRG. 1475. 4 | 371  | 0. 44682 | 7. 67791748  | 1 |
| MSTRG. 1475. 5 | 371  | 0. 42055 | 7. 67791748  | 1 |
| MSTRG. 1475. 6 | 346  | 0. 44682 | 6. 460876465 | 1 |
| MSTRG. 1477. 1 | 189  | 0. 27763 | 9. 367736816 | 1 |

|                 |      |          |              |    |
|-----------------|------|----------|--------------|----|
| MSTRG. 1473. 1  | 1027 | 0. 44385 | 5. 241394043 | 1  |
| MSTRG. 1473. 2  | 1017 | 0. 44943 | 5. 269470215 | 1  |
| MSTRG. 1494. 2  | 226  | 0. 42721 | 8. 938415527 | 1  |
| MSTRG. 1495. 1  | 90   | 0. 36631 | 6. 942810059 | 1  |
| MSTRG. 1496. 1  | 1979 | 0. 44379 | 6. 273254395 | 1  |
| MSTRG. 1497. 1  | 518  | 0. 35722 | 6. 283996582 | 1  |
| MSTRG. 1497. 2  | 718  | 0. 45057 | 6. 35748291  | 1  |
| MSTRG. 1499. 1  | 164  | 0. 35948 | 6. 512390137 | 1  |
| MSTRG. 1500. 3  | 315  | 0. 43542 | 6. 527404785 | 1  |
| MSTRG. 1501. 5  | 3151 | 0. 40596 | 5. 27557373  | 1  |
| MSTRG. 1501. 1  | 3169 | 0. 40596 | 5. 339050293 | 1  |
| MSTRG. 1501. 2  | 3115 | 0. 40596 | 5. 313781738 | 1  |
| MSTRG. 1501. 3  | 3109 | 0. 40596 | 5. 319396973 | 1  |
| MSTRG. 1501. 4  | 3175 | 0. 40596 | 5. 333312988 | 1  |
| MSTRG. 1501. 6  | 3205 | 0. 40596 | 5. 299743652 | 1  |
| MSTRG. 1501. 9  | 3116 | 0. 40596 | 5. 320495605 | 1  |
| MSTRG. 1501. 10 | 3176 | 0. 40596 | 5. 340148926 | 1  |
| MSTRG. 1501. 11 | 3168 | 0. 40596 | 5. 332214355 | 1  |
| MSTRG. 1501. 14 | 805  | 0. 41021 | 8. 164733887 | 1  |
| MSTRG. 1481. 1  | 73   | 0. 31168 | 10. 11114502 | 1  |
| MSTRG. 1483. 2  | 184  | 0. 27705 | 6. 662658691 | 1  |
| MSTRG. 1484. 1  | 178  | 0. 32191 | 10. 43988037 | -1 |
| MSTRG. 1512. 6  | 440  | 0. 41135 | 8. 507995605 | 1  |
| MSTRG. 1512. 5  | 127  | 0. 39622 | 5. 215148926 | 1  |
| MSTRG. 1512. 7  | 199  | 0. 28248 | 7. 312805176 | 1  |
| MSTRG. 1512. 10 | 468  | 0. 28338 | 8. 717956543 | 1  |
| MSTRG. 1512. 8  | 468  | 0. 28584 | 8. 717956543 | 1  |
| MSTRG. 1512. 9  | 199  | 0. 28584 | 7. 312805176 | 1  |
| MSTRG. 1512. 11 | 468  | 0. 28584 | 8. 717956543 | 1  |
| MSTRG. 1512. 12 | 214  | 0. 28567 | 9. 888122559 | 1  |
| MSTRG. 1512. 13 | 183  | 0. 27458 | 10. 1494751  | 1  |
| MSTRG. 1512. 14 | 214  | 0. 28584 | 9. 888122559 | 1  |
| MSTRG. 1512. 15 | 214  | 0. 28584 | 9. 888122559 | 1  |
| MSTRG. 1512. 16 | 175  | 0. 29776 | 10. 44549561 | 1  |
| MSTRG. 1512. 17 | 175  | 0. 30132 | 10. 44549561 | 1  |
| MSTRG. 1512. 18 | 214  | 0. 27911 | 9. 888122559 | 1  |
| MSTRG. 1512. 19 | 183  | 0. 28179 | 10. 1494751  | 1  |
| MSTRG. 1514. 1  | 169  | 0. 38358 | 5. 851745605 | 1  |
| MSTRG. 1509. 3  | 2287 | 0. 43796 | 5. 78326416  | 1  |
| MSTRG. 1511. 2  | 533  | 0. 37533 | 8. 447814941 | 1  |
| MSTRG. 1511. 3  | 564  | 0. 30871 | 7. 584777832 | 1  |
| MSTRG. 1511. 5  | 390  | 0. 27327 | 9. 238830566 | 1  |
| MSTRG. 1516. 1  | 72   | 0. 3901  | 10. 71307373 | -1 |
| MSTRG. 1518. 1  | 77   | 0. 37723 | 8. 954406738 | 1  |
| MSTRG. 1519. 1  | 69   | 0. 31609 | 9. 61151123  | -1 |
| MSTRG. 1520. 2  | 368  | 0. 31857 | 5. 995666504 | 1  |
| MSTRG. 1535. 1  | 110  | 0. 29795 | 6. 030700684 | 1  |
| MSTRG. 1536. 1  | 82   | 0. 3392  | 6. 481994629 | 1  |
| MSTRG. 1537. 4  | 138  | 0. 43241 | 6. 722351074 | 1  |
| MSTRG. 1538. 1  | 188  | 0. 31309 | 9. 677429199 | 1  |
| MSTRG. 1538. 7  | 1397 | 0. 45618 | 6. 042053223 | -1 |
| MSTRG. 1538. 8  | 358  | 0. 44908 | 8. 557189941 | 1  |
| MSTRG. 1538. 9  | 882  | 0. 37723 | 8. 831970215 | 1  |
| MSTRG. 1538. 10 | 1209 | 0. 49712 | 6. 141052246 | 1  |

|                 |      |          |              |    |
|-----------------|------|----------|--------------|----|
| MSTRG. 1538. 12 | 373  | 0. 32396 | 5. 582092285 | 1  |
| MSTRG. 1538. 13 | 418  | 0. 32396 | 5. 672546387 | 1  |
| MSTRG. 1526. 2  | 277  | 0. 42886 | 6. 656433105 | 1  |
| MSTRG. 1531. 6  | 65   | 0. 36971 | 7. 607116699 | 1  |
| MSTRG. 1531. 5  | 101  | 0. 29415 | 7. 737243652 | 1  |
| MSTRG. 1531. 4  | 725  | 0. 38655 | 8. 931091309 | 1  |
| MSTRG. 1531. 7  | 811  | 0. 29268 | 9. 203796387 | 1  |
| MSTRG. 1532. 1  | 95   | 0. 3654  | 9. 771057129 | 1  |
| MSTRG. 1533. 1  | 70   | 0. 32557 | 7. 878356934 | 1  |
| MSTRG. 1531. 8  | 725  | 0. 36605 | 8. 931091309 | 1  |
| MSTRG. 1531. 9  | 734  | 0. 38655 | 8. 866271973 | 1  |
| MSTRG. 1534. 1  | 167  | 0. 32208 | 10. 20904541 | 1  |
| MSTRG. 1531. 10 | 734  | 0. 3489  | 8. 866271973 | 1  |
| MSTRG. 1528. 1  | 116  | 0. 28153 | 10. 70916748 | 1  |
| MSTRG. 1528. 3  | 65   | 0. 27851 | 9. 056945801 | 1  |
| MSTRG. 1530. 1  | 118  | 0. 32126 | 6. 708068848 | 1  |
| MSTRG. 1544. 1  | 486  | 0. 35593 | 6. 81072998  | 1  |
| MSTRG. 1544. 2  | 486  | 0. 38733 | 6. 81072998  | 1  |
| MSTRG. 1545. 1  | 50   | 0. 45249 | 11. 9151001  | -1 |
| MSTRG. 1549. 1  | 72   | 0. 3546  | 5. 519470215 | 1  |
| MSTRG. 1550. 5  | 818  | 0. 46195 | 6. 337585449 | 1  |
| MSTRG. 1550. 6  | 1118 | 0. 44085 | 6. 910827637 | 1  |
| MSTRG. 1550. 7  | 147  | 0. 3344  | 5. 749694824 | 1  |
| MSTRG. 1554. 2  | 451  | 0. 42904 | 5. 22869873  | 1  |
| MSTRG. 1555. 1  | 49   | 0. 34311 | 10. 84307861 | 1  |
| MSTRG. 1556. 1  | 165  | 0. 26999 | 9. 359802246 | 1  |
| MSTRG. 1562. 3  | 117  | 0. 41501 | 9. 774475098 | 1  |
| MSTRG. 1562. 4  | 249  | 0. 32032 | 5. 922424316 | 1  |
| MSTRG. 1562. 5  | 117  | 0. 42186 | 9. 774475098 | 1  |
| MSTRG. 1563. 1  | 207  | 0. 3656  | 7. 736999512 | 1  |
| MSTRG. 1563. 3  | 252  | 0. 27781 | 8. 940490723 | 1  |
| MSTRG. 1558. 2  | 88   | 0. 29447 | 6. 041320801 | -1 |
| MSTRG. 1560. 1  | 105  | 0. 29509 | 7. 616638184 | 1  |
| MSTRG. 1576. 2  | 525  | 0. 46362 | 5. 85760498  | 1  |
| MSTRG. 1578. 4  | 616  | 0. 39945 | 6. 336975098 | 1  |
| MSTRG. 1578. 7  | 899  | 0. 46679 | 5. 659118652 | 1  |
| MSTRG. 1578. 9  | 86   | 0. 36627 | 9. 353942871 | 1  |
| MSTRG. 1578. 11 | 110  | 0. 3287  | 8. 883605957 | 1  |
| MSTRG. 1578. 10 | 92   | 0. 29835 | 9. 466003418 | 1  |
| MSTRG. 1578. 12 | 361  | 0. 32642 | 8. 74810791  | 1  |
| MSTRG. 1578. 13 | 167  | 0. 29772 | 10. 27178955 | 1  |
| MSTRG. 1578. 14 | 85   | 0. 34975 | 10. 8324585  | 1  |
| MSTRG. 1567. 3  | 188  | 0. 38106 | 6. 655334473 | 1  |
| MSTRG. 1567. 4  | 188  | 0. 32237 | 6. 655334473 | 1  |
| MSTRG. 1567. 5  | 264  | 0. 39787 | 9. 167053223 | 1  |
| MSTRG. 1567. 7  | 69   | 0. 3076  | 6. 237121582 | 1  |
| MSTRG. 1568. 2  | 287  | 0. 37689 | 6. 198425293 | 1  |
| MSTRG. 1568. 4  | 287  | 0. 39429 | 6. 198425293 | 1  |
| MSTRG. 1568. 6  | 549  | 0. 42441 | 5. 326477051 | 1  |
| MSTRG. 1568. 5  | 549  | 0. 43008 | 5. 326477051 | 1  |
| MSTRG. 1573. 1  | 144  | 0. 37894 | 5. 371643066 | 1  |
| MSTRG. 1574. 2  | 295  | 0. 46887 | 8. 90423584  | 1  |
| MSTRG. 1574. 3  | 295  | 0. 37598 | 8. 90423584  | 1  |
| MSTRG. 1589. 1  | 57   | 0. 41405 | 9. 62310791  | 1  |

|                |      |          |              |    |
|----------------|------|----------|--------------|----|
| MSTRG. 1590. 1 | 144  | 0. 38169 | 9. 47479248  | 1  |
| MSTRG. 1592. 2 | 198  | 0. 34572 | 4. 531799316 | 1  |
| MSTRG. 1592. 1 | 335  | 0. 31693 | 6. 54473877  | 1  |
| MSTRG. 1592. 4 | 164  | 0. 30265 | 9. 261413574 | 1  |
| MSTRG. 1592. 5 | 335  | 0. 40228 | 5. 510559082 | 1  |
| MSTRG. 1592. 6 | 335  | 0. 4495  | 5. 510559082 | 1  |
| MSTRG. 1593. 1 | 50   | 0. 29908 | 7. 742980957 | 1  |
| MSTRG. 1592. 7 | 178  | 0. 34706 | 8. 362976074 | 1  |
| MSTRG. 1592. 8 | 95   | 0. 34852 | 7. 694763184 | 1  |
| MSTRG. 1594. 1 | 213  | 0. 40746 | 8. 693908691 | 1  |
| MSTRG. 1595. 1 | 107  | 0. 31567 | 8. 680236816 | 1  |
| MSTRG. 1596. 1 | 82   | 0. 35619 | 10. 14581299 | 1  |
| MSTRG. 1597. 1 | 27   | 0. 39474 | 8. 907653809 | 1  |
| MSTRG. 1598. 1 | 81   | 0. 31341 | 4. 316101074 | 1  |
| MSTRG. 1596. 2 | 146  | 0. 28066 | 8. 434265137 | 1  |
| MSTRG. 1583. 1 | 18   | 0. 41203 | 6. 49822998  | 1  |
| MSTRG. 1583. 2 | 22   | 0. 35829 | 7. 83404541  | 1  |
| MSTRG. 1585. 1 | 69   | 0. 47123 | 9. 79107666  | 1  |
| MSTRG. 1600. 1 | 79   | 0. 38917 | 11. 8604126  | 1  |
| MSTRG. 1603. 1 | 342  | 0. 48966 | 8. 10357666  | -1 |
| MSTRG. 1604. 1 | 41   | 0. 43825 | 9. 945495605 | 1  |
| MSTRG. 1606. 1 | 69   | 0. 3547  | 12. 00262451 | 1  |
| MSTRG. 1610. 1 | 103  | 0. 43617 | 10. 09527588 | 1  |
| MSTRG. 1610. 3 | 259  | 0. 35568 | 5. 153991699 | 1  |
| MSTRG. 1610. 4 | 340  | 0. 46829 | 6. 202697754 | 1  |
| MSTRG. 1613. 3 | 80   | 0. 28165 | 9. 695739746 | 1  |
| MSTRG. 1614. 1 | 418  | 0. 38655 | 9. 886047363 | 1  |
| MSTRG. 1614. 2 | 388  | 0. 37942 | 9. 83770752  | 1  |
| MSTRG. 1614. 3 | 160  | 0. 42084 | 5. 949157715 | 1  |
| MSTRG. 1614. 4 | 632  | 0. 36033 | 9. 611755371 | 1  |
| MSTRG. 1618. 1 | 813  | 0. 35168 | 9. 190002441 | 1  |
| MSTRG. 1618. 2 | 86   | 0. 34003 | 7. 664733887 | -1 |
| MSTRG. 1618. 4 | 458  | 0. 41221 | 9. 071105957 | 1  |
| MSTRG. 1618. 3 | 584  | 0. 44693 | 9. 310852051 | 1  |
| MSTRG. 1619. 1 | 129  | 0. 29223 | 12. 10003662 | 1  |
| MSTRG. 1619. 2 | 141  | 0. 26837 | 11. 63140869 | 1  |
| MSTRG. 1623. 2 | 379  | 0. 41443 | 6. 688415527 | 1  |
| MSTRG. 1637. 4 | 96   | 0. 28432 | 9. 688903809 | 1  |
| MSTRG. 1637. 5 | 311  | 0. 31588 | 4. 809631348 | 1  |
| MSTRG. 1632. 1 | 146  | 0. 29607 | 9. 614074707 | 1  |
| MSTRG. 1632. 2 | 146  | 0. 30816 | 9. 614074707 | 1  |
| MSTRG. 1644. 3 | 2795 | 0. 37782 | 6. 133483887 | 1  |
| MSTRG. 1642. 3 | 360  | 0. 34162 | 7. 656677246 | 1  |
| MSTRG. 1640. 1 | 62   | 0. 30705 | 6. 498352051 | 1  |
| MSTRG. 1647. 3 | 180  | 0. 39385 | 9. 38861084  | 1  |
| MSTRG. 1650. 1 | 215  | 0. 28311 | 9. 178039551 | 1  |
| MSTRG. 1650. 2 | 215  | 0. 28463 | 9. 178039551 | 1  |
| MSTRG. 1650. 3 | 215  | 0. 28463 | 9. 178039551 | 1  |
| MSTRG. 1653. 1 | 195  | 0. 33128 | 9. 25579834  | 1  |
| MSTRG. 1654. 1 | 222  | 0. 31672 | 5. 389831543 | 1  |
| MSTRG. 1654. 2 | 221  | 0. 31672 | 5. 389831543 | 1  |
| MSTRG. 1654. 3 | 275  | 0. 32925 | 5. 828308105 | 1  |
| MSTRG. 1657. 1 | 59   | 0. 36168 | 9. 518859863 | 1  |
| MSTRG. 1659. 1 | 77   | 0. 389   | 9. 019836426 | 1  |

|                 |      |          |               |    |
|-----------------|------|----------|---------------|----|
| MSTRG. 1662. 1  | 1057 | 0. 34907 | 9. 908752441  | 1  |
| MSTRG. 1662. 4  | 1004 | 0. 47537 | 9. 967102051  | 1  |
| MSTRG. 1662. 7  | 1024 | 0. 47537 | 9. 896179199  | 1  |
| MSTRG. 1662. 9  | 1057 | 0. 46102 | 9. 908752441  | 1  |
| MSTRG. 1662. 10 | 1028 | 0. 47484 | 9. 883850098  | 1  |
| MSTRG. 1662. 12 | 998  | 0. 45418 | 9. 814880371  | 1  |
| MSTRG. 1662. 13 | 720  | 0. 48524 | 9. 711730957  | 1  |
| MSTRG. 1663. 1  | 310  | 0. 32934 | 9. 181335449  | 1  |
| MSTRG. 1663. 5  | 164  | 0. 46126 | 5. 167419434  | -1 |
| MSTRG. 1663. 4  | 63   | 0. 3708  | 8. 589538574  | 1  |
| MSTRG. 1663. 3  | 87   | 0. 34305 | 4. 743713379  | 1  |
| MSTRG. 1665. 1  | 65   | 0. 31821 | 4. 685852051  | 1  |
| MSTRG. 1667. 1  | 78   | 0. 26785 | 5. 062072754  | 1  |
| MSTRG. 1671. 1  | 483  | 0. 4257  | 11. 459777783 | 1  |
| MSTRG. 1673. 5  | 228  | 0. 37451 | 12. 20574951  | 1  |
| MSTRG. 1673. 4  | 845  | 0. 46832 | 4. 533630371  | 1  |
| MSTRG. 1673. 3  | 767  | 0. 45246 | 4. 379089355  | 1  |
| MSTRG. 1675. 1  | 98   | 0. 3     | 10. 67669678  | 1  |
| MSTRG. 1676. 1  | 31   | 0. 38592 | 11. 52288818  | 1  |
| MSTRG. 1677. 1  | 43   | 0. 34842 | 10. 01678467  | 1  |
| MSTRG. 1678. 1  | 87   | 0. 35248 | 10. 73040771  | -1 |
| MSTRG. 1681. 1  | 261  | 0. 44449 | 5. 505432129  | 1  |
| MSTRG. 1685. 2  | 204  | 0. 33747 | 4. 794616699  | 1  |
| MSTRG. 1685. 3  | 204  | 0. 44666 | 4. 794616699  | 1  |
| MSTRG. 1689. 1  | 33   | 0. 42348 | 6. 690734863  | 1  |
| MSTRG. 1691. 1  | 37   | 0. 29543 | 5. 86920166   | 1  |
| MSTRG. 1692. 1  | 95   | 0. 39212 | 4. 832824707  | 1  |
| MSTRG. 1697. 2  | 216  | 0. 45241 | 7. 694274902  | 1  |
| MSTRG. 1697. 1  | 61   | 0. 32396 | 6. 695251465  | 1  |
| MSTRG. 1697. 3  | 275  | 0. 32798 | 7. 780822754  | 1  |
| MSTRG. 1697. 4  | 61   | 0. 43573 | 6. 695251465  | 1  |
| MSTRG. 1709. 2  | 576  | 0. 35079 | 8. 442443848  | 1  |
| MSTRG. 1709. 4  | 1077 | 0. 43206 | 7. 963806152  | 1  |
| MSTRG. 1709. 6  | 1077 | 0. 44642 | 7. 963806152  | 1  |
| MSTRG. 1709. 8  | 843  | 0. 42522 | 7. 07989502   | 1  |
| MSTRG. 1716. 2  | 199  | 0. 38769 | 5. 531188965  | 1  |
| MSTRG. 1716. 1  | 124  | 0. 37862 | 4. 734558105  | 1  |
| MSTRG. 1716. 3  | 124  | 0. 43176 | 4. 734558105  | 1  |
| MSTRG. 1717. 1  | 111  | 0. 41833 | 4. 929870605  | 1  |
| MSTRG. 1725. 1  | 206  | 0. 35567 | 10. 67547607  | 1  |
| MSTRG. 1726. 1  | 123  | 0. 31615 | 7. 659729004  | 1  |
| MSTRG. 1721. 1  | 23   | 0. 40873 | 9. 788513184  | -1 |
| MSTRG. 1721. 2  | 47   | 0. 44478 | 4. 386413574  | -1 |
| MSTRG. 1729. 2  | 369  | 0. 32553 | 8. 907165527  | 1  |
| MSTRG. 1730. 1  | 171  | 0. 30223 | 8. 78692627   | 1  |
| MSTRG. 1731. 1  | 101  | 0. 34889 | 8. 350036621  | 1  |
| MSTRG. 1734. 1  | 89   | 0. 29904 | 10. 05194092  | 1  |
| MSTRG. 1734. 2  | 56   | 0. 40026 | 9. 743469238  | 1  |
| MSTRG. 1727. 1  | 145  | 0. 29367 | 9. 421569824  | 1  |
| MSTRG. 1727. 2  | 30   | 0. 416   | 8. 518981934  | 1  |
| MSTRG. 1740. 3  | 277  | 0. 44964 | 4. 478088379  | 1  |
| MSTRG. 1740. 2  | 221  | 0. 38402 | 4. 30279541   | 1  |
| MSTRG. 1745. 1  | 4906 | 0. 45865 | 6. 246032715  | 1  |
| MSTRG. 1745. 3  | 6941 | 0. 44727 | 6. 046447754  | 1  |

|                |       |          |              |    |
|----------------|-------|----------|--------------|----|
| MSTRG. 1753. 1 | 45    | 0. 40891 | 6. 367004395 | 1  |
| MSTRG. 1753. 2 | 53    | 0. 42474 | 9. 295959473 | 1  |
| MSTRG. 1768. 1 | 327   | 0. 43985 | 9. 146179199 | 1  |
| MSTRG. 1768. 2 | 310   | 0. 46708 | 9. 392150879 | 1  |
| MSTRG. 1768. 3 | 179   | 0. 38549 | 8. 798278809 | 1  |
| MSTRG. 1770. 2 | 81    | 0. 39384 | 9. 624572754 | 1  |
| MSTRG. 1772. 1 | 793   | 0. 46393 | 6. 405334473 | 1  |
| MSTRG. 1772. 3 | 793   | 0. 46145 | 6. 405334473 | 1  |
| MSTRG. 1772. 4 | 316   | 0. 4409  | 5. 899719238 | -1 |
| MSTRG. 1773. 1 | 30    | 0. 47878 | 9. 500183105 | 1  |
| MSTRG. 1774. 1 | 33    | 0. 35394 | 6. 524597168 | 1  |
| MSTRG. 1777. 2 | 512   | 0. 47004 | 7. 052185059 | 1  |
| MSTRG. 1777. 3 | 496   | 0. 41922 | 6. 244689941 | 1  |
| MSTRG. 1782. 1 | 1237  | 0. 47516 | 5. 058288574 | 1  |
| MSTRG. 1782. 5 | 1083  | 0. 46853 | 5. 16229248  | 1  |
| MSTRG. 1782. 4 | 930   | 0. 34959 | 5. 067199707 | 1  |
| MSTRG. 1783. 1 | 67    | 0. 28334 | 10. 02215576 | 1  |
| MSTRG. 1784. 1 | 182   | 0. 28518 | 10. 22991943 | 1  |
| MSTRG. 1787. 1 | 61    | 0. 40957 | 9. 730163574 | 1  |
| MSTRG. 1787. 2 | 61    | 0. 3833  | 9. 730163574 | 1  |
| MSTRG. 1779. 1 | 60    | 0. 3819  | 11. 75421143 | -1 |
| MSTRG. 1780. 1 | 89    | 0. 27385 | 9. 496643066 | 1  |
| MSTRG. 1791. 2 | 520   | 0. 47254 | 7. 61126709  | 1  |
| MSTRG. 1791. 3 | 598   | 0. 45713 | 8. 114929199 | 1  |
| MSTRG. 1798. 1 | 68    | 0. 29366 | 8. 936096191 | 1  |
| MSTRG. 1799. 1 | 207   | 0. 35415 | 6. 733093262 | 1  |
| MSTRG. 1799. 2 | 207   | 0. 32442 | 6. 733093262 | 1  |
| MSTRG. 1799. 3 | 207   | 0. 37626 | 6. 733093262 | 1  |
| MSTRG. 1799. 4 | 207   | 0. 39392 | 6. 733093262 | 1  |
| MSTRG. 1799. 7 | 82    | 0. 32697 | 5. 144470215 | 1  |
| MSTRG. 1799. 6 | 207   | 0. 36554 | 6. 733093262 | 1  |
| MSTRG. 1798. 2 | 68    | 0. 29575 | 8. 936096191 | 1  |
| MSTRG. 1798. 3 | 81    | 0. 2921  | 10. 62042236 | 1  |
| MSTRG. 1799. 8 | 83    | 0. 30092 | 5. 440979004 | 1  |
| MSTRG. 1805. 1 | 243   | 0. 35373 | 7. 663513184 | 1  |
| MSTRG. 1805. 3 | 369   | 0. 39677 | 9. 947692871 | 1  |
| MSTRG. 1801. 1 | 41    | 0. 34112 | 7. 933776855 | 1  |
| MSTRG. 1801. 2 | 16    | 0. 36466 | 5. 895202637 | 1  |
| MSTRG. 1801. 3 | 51    | 0. 32546 | 9. 559753418 | 1  |
| MSTRG. 1804. 1 | 550   | 0. 44215 | 9. 629577637 | -1 |
| MSTRG. 1819. 1 | 22220 | 0. 44832 | 6. 498962402 | 1  |
| MSTRG. 1811. 3 | 123   | 0. 42413 | 8. 41583252  | 1  |
| MSTRG. 1814. 1 | 928   | 0. 37021 | 6. 36541748  | 1  |
| MSTRG. 1814. 3 | 928   | 0. 40483 | 6. 36541748  | 1  |
| MSTRG. 1814. 4 | 928   | 0. 43494 | 6. 36541748  | 1  |
| MSTRG. 1814. 2 | 928   | 0. 43494 | 6. 36541748  | 1  |
| MSTRG. 1814. 7 | 928   | 0. 42437 | 6. 36541748  | 1  |
| MSTRG. 1814. 8 | 69    | 0. 33388 | 9. 969177246 | 1  |
| MSTRG. 1818. 1 | 474   | 0. 37532 | 6. 736022949 | 1  |
| MSTRG. 1818. 3 | 475   | 0. 37532 | 6. 736022949 | 1  |
| MSTRG. 1832. 1 | 97    | 0. 30387 | 8. 675354004 | 1  |
| MSTRG. 1832. 3 | 238   | 0. 32586 | 6. 31817627  | 1  |
| MSTRG. 1833. 2 | 84    | 0. 30806 | 7. 777038574 | 1  |
| MSTRG. 1833. 1 | 78    | 0. 37598 | 4. 777526855 | 1  |

|                 |     |          |              |    |
|-----------------|-----|----------|--------------|----|
| MSTRG. 1833. 3  | 78  | 0. 32954 | 4. 777526855 | 1  |
| MSTRG. 1834. 1  | 183 | 0. 35032 | 10. 39398193 | 1  |
| MSTRG. 1840. 1  | 56  | 0. 31574 | 11. 39654541 | 1  |
| MSTRG. 1829. 1  | 95  | 0. 31553 | 9. 137512207 | 1  |
| MSTRG. 1841. 5  | 209 | 0. 48726 | 6. 586608887 | -1 |
| MSTRG. 1847. 1  | 429 | 0. 4694  | 5. 07989502  | 1  |
| MSTRG. 1847. 2  | 152 | 0. 32948 | 9. 618103027 | 1  |
| MSTRG. 1869. 1  | 70  | 0. 2921  | 9. 742370605 | -1 |
| MSTRG. 1868. 11 | 186 | 0. 29367 | 10. 94952393 | 1  |
| MSTRG. 1868. 12 | 110 | 0. 30132 | 9. 778747559 | 1  |
| MSTRG. 1868. 13 | 60  | 0. 32421 | 8. 934020996 | 1  |
| MSTRG. 1873. 1  | 49  | 0. 34372 | 10. 2164917  | 1  |
| MSTRG. 1874. 1  | 218 | 0. 29115 | 9. 828674316 | 1  |
| MSTRG. 1874. 2  | 112 | 0. 28683 | 10. 53094482 | 1  |
| MSTRG. 1849. 4  | 447 | 0. 45871 | 6. 61126709  | 1  |
| MSTRG. 1850. 1  | 178 | 0. 3052  | 10. 02545166 | 1  |
| MSTRG. 1856. 4  | 781 | 0. 45905 | 6. 822814941 | 1  |
| MSTRG. 1857. 1  | 422 | 0. 33514 | 5. 448425293 | 1  |
| MSTRG. 1860. 1  | 396 | 0. 44888 | 7. 641418457 | 1  |
| MSTRG. 1860. 5  | 158 | 0. 28883 | 8. 809753418 | 1  |
| MSTRG. 1860. 6  | 129 | 0. 34203 | 8. 52557373  | 1  |
| MSTRG. 1860. 3  | 396 | 0. 45761 | 7. 641418457 | 1  |
| MSTRG. 1860. 4  | 396 | 0. 48426 | 7. 641418457 | 1  |
| MSTRG. 1862. 1  | 54  | 0. 41095 | 4. 750061035 | 1  |
| MSTRG. 1860. 7  | 238 | 0. 3208  | 9. 300231934 | 1  |
| MSTRG. 1864. 1  | 86  | 0. 32185 | 9. 124328613 | 1  |
| MSTRG. 1865. 1  | 73  | 0. 33354 | 4. 366027832 | 1  |
| MSTRG. 1866. 1  | 88  | 0. 28848 | 11. 29168701 | 1  |
| MSTRG. 1867. 2  | 732 | 0. 46079 | 5. 309631348 | 1  |
| MSTRG. 1867. 3  | 733 | 0. 47038 | 5. 309631348 | 1  |
| MSTRG. 1891. 2  | 456 | 0. 31653 | 5. 097961426 | 1  |
| MSTRG. 1895. 2  | 392 | 0. 39257 | 9. 09552002  | 1  |
| MSTRG. 1895. 3  | 62  | 0. 33863 | 9. 299377441 | 1  |
| MSTRG. 1895. 5  | 121 | 0. 36389 | 9. 012878418 | 1  |
| MSTRG. 1895. 4  | 351 | 0. 4119  | 8. 202087402 | 1  |
| MSTRG. 1900. 3  | 413 | 0. 47249 | 5. 59564209  | 1  |
| MSTRG. 1900. 4  | 413 | 0. 46496 | 5. 59564209  | 1  |
| MSTRG. 1900. 5  | 419 | 0. 47634 | 5. 59564209  | 1  |
| MSTRG. 1900. 6  | 88  | 0. 39094 | 9. 673278809 | 1  |
| MSTRG. 1902. 4  | 612 | 0. 48525 | 5. 167297363 | 1  |
| MSTRG. 1906. 1  | 96  | 0. 34504 | 8. 589294434 | 1  |
| MSTRG. 1907. 2  | 303 | 0. 42291 | 5. 153991699 | 1  |
| MSTRG. 1907. 3  | 442 | 0. 41754 | 5. 643859863 | 1  |
| MSTRG. 1907. 4  | 442 | 0. 43804 | 5. 643859863 | 1  |
| MSTRG. 1911. 1  | 105 | 0. 36796 | 9. 225402832 | -1 |
| MSTRG. 1912. 2  | 413 | 0. 32015 | 9. 700012207 | 1  |
| MSTRG. 1912. 4  | 116 | 0. 43047 | 5. 855285645 | 1  |
| MSTRG. 1912. 7  | 429 | 0. 31677 | 9. 614562988 | 1  |
| MSTRG. 1914. 1  | 68  | 0. 36412 | 9. 742370605 | 1  |
| MSTRG. 1912. 8  | 39  | 0. 31928 | 9. 184875488 | 1  |
| MSTRG. 1912. 9  | 298 | 0. 30387 | 6. 594909668 | 1  |
| MSTRG. 1909. 2  | 387 | 0. 43035 | 4. 449035645 | 1  |
| MSTRG. 1910. 1  | 54  | 0. 38503 | 8. 47467041  | 1  |
| MSTRG. 1922. 1  | 225 | 0. 46175 | 4. 391540527 | 1  |



|                 |      |          |              |    |
|-----------------|------|----------|--------------|----|
| MSTRG. 1922. 4  | 142  | 0. 44938 | 3. 890441895 | 1  |
| MSTRG. 1922. 6  | 142  | 0. 47398 | 3. 890441895 | 1  |
| MSTRG. 1922. 5  | 287  | 0. 48419 | 4. 634094238 | 1  |
| MSTRG. 1923. 1  | 69   | 0. 43794 | 6. 223449707 | -1 |
| MSTRG. 1924. 1  | 58   | 0. 38533 | 5. 25213623  | 1  |
| MSTRG. 1924. 2  | 58   | 0. 40225 | 5. 25213623  | 1  |
| MSTRG. 1928. 3  | 1088 | 0. 44355 | 8. 612121582 | 1  |
| MSTRG. 1928. 5  | 1088 | 0. 4296  | 8. 612121582 | 1  |
| MSTRG. 1928. 7  | 797  | 0. 39394 | 6. 727111816 | 1  |
| MSTRG. 1928. 8  | 81   | 0. 36241 | 9. 11517334  | -1 |
| MSTRG. 1928. 9  | 349  | 0. 37218 | 5. 066711426 | 1  |
| MSTRG. 1928. 10 | 88   | 0. 29595 | 8. 272277832 | 1  |
| MSTRG. 1930. 1  | 125  | 0. 30576 | 9. 868103027 | 1  |
| MSTRG. 1928. 11 | 90   | 0. 29919 | 10. 30059814 | 1  |
| MSTRG. 1928. 12 | 145  | 0. 29387 | 9. 441345215 | 1  |
| MSTRG. 1928. 13 | 105  | 0. 31035 | 6. 002990723 | 1  |
| MSTRG. 1920. 4  | 1888 | 0. 46333 | 5. 717468262 | 1  |
| MSTRG. 1920. 5  | 1889 | 0. 46581 | 5. 717468262 | 1  |
| MSTRG. 1920. 6  | 599  | 0. 35421 | 6. 294616699 | 1  |
| MSTRG. 1920. 7  | 1888 | 0. 48146 | 5. 717468262 | 1  |
| MSTRG. 1921. 1  | 128  | 0. 3046  | 9. 300720215 | 1  |
| MSTRG. 1918. 3  | 213  | 0. 33985 | 9. 051086426 | 1  |
| MSTRG. 1940. 1  | 195  | 0. 30387 | 7. 085144043 | 1  |
| MSTRG. 1940. 2  | 558  | 0. 34519 | 5. 349182129 | 1  |
| MSTRG. 1940. 5  | 424  | 0. 32642 | 5. 382751465 | 1  |
| MSTRG. 1940. 4  | 415  | 0. 32257 | 5. 671936035 | 1  |
| MSTRG. 1941. 1  | 74   | 0. 29615 | 8. 297912598 | 1  |
| MSTRG. 1943. 1  | 116  | 0. 35742 | 5. 883728027 | -1 |
| MSTRG. 1943. 2  | 52   | 0. 30112 | 6. 50982666  | -1 |
| MSTRG. 1943. 4  | 241  | 0. 46633 | 5. 611633301 | 1  |
| MSTRG. 1945. 2  | 290  | 0. 46391 | 9. 09564209  | 1  |
| MSTRG. 1948. 1  | 57   | 0. 28726 | 9. 694641113 | 1  |
| MSTRG. 1949. 1  | 151  | 0. 35155 | 10. 07977295 | 1  |
| MSTRG. 1951. 1  | 918  | 0. 46606 | 5. 414001465 | 1  |
| MSTRG. 1934. 1  | 4649 | 0. 46495 | 5. 043762207 | 1  |
| MSTRG. 1953. 1  | 86   | 0. 30301 | 10. 20123291 | 1  |
| MSTRG. 1954. 1  | 81   | 0. 29475 | 6. 815612793 | 1  |
| MSTRG. 1995. 1  | 83   | 0. 33863 | 5. 114440918 | 1  |
| MSTRG. 2012. 1  | 90   | 0. 3152  | 7. 764953613 | 1  |
| MSTRG. 2013. 1  | 61   | 0. 45497 | 5. 986633301 | 1  |
| MSTRG. 2022. 1  | 126  | 0. 25765 | 4. 935974121 | 1  |
| MSTRG. 2023. 1  | 108  | 0. 29367 | 10. 44903564 | 1  |
| MSTRG. 2023. 2  | 108  | 0. 29367 | 10. 44903564 | 1  |
| MSTRG. 2025. 1  | 71   | 0. 27517 | 9. 868103027 | 1  |
| MSTRG. 2028. 1  | 116  | 0. 2765  | 8. 70892334  | 1  |
| MSTRG. 1959. 1  | 868  | 0. 48038 | 6. 190979004 | 1  |
| MSTRG. 1959. 3  | 1287 | 0. 47855 | 6. 540344238 | 1  |
| MSTRG. 1960. 1  | 423  | 0. 40611 | 7. 604797363 | 1  |
| MSTRG. 1962. 1  | 36   | 0. 42036 | 8. 504333496 | 1  |
| MSTRG. 1962. 2  | 36   | 0. 41493 | 8. 504333496 | 1  |
| MSTRG. 1968. 3  | 1141 | 0. 46599 | 6. 717834473 | 1  |
| MSTRG. 1968. 8  | 1272 | 0. 43965 | 6. 897888184 | 1  |
| MSTRG. 1972. 2  | 430  | 0. 36032 | 8. 895812988 | 1  |
| MSTRG. 1972. 6  | 252  | 0. 30596 | 9. 443908691 | 1  |

|                 |      |          |              |    |
|-----------------|------|----------|--------------|----|
| MSTRG. 1972. 4  | 182  | 0. 36197 | 9. 030700684 | 1  |
| MSTRG. 1972. 3  | 472  | 0. 3918  | 9. 175354004 | 1  |
| MSTRG. 1972. 8  | 233  | 0. 37782 | 9. 559387207 | 1  |
| MSTRG. 1972. 10 | 249  | 0. 35339 | 8. 673522949 | 1  |
| MSTRG. 1972. 9  | 154  | 0. 30576 | 6. 215515137 | 1  |
| MSTRG. 1972. 11 | 220  | 0. 38152 | 8. 582702637 | 1  |
| MSTRG. 1970. 1  | 12   | 0. 32598 | 6. 487976074 | 1  |
| MSTRG. 1989. 1  | 46   | 0. 37419 | 6. 691589355 | 1  |
| MSTRG. 1989. 2  | 43   | 0. 38543 | 6. 694030762 | 1  |
| MSTRG. 1990. 1  | 95   | 0. 39094 | 9. 641906738 | -1 |
| MSTRG. 2059. 1  | 107  | 0. 37264 | 6. 480529785 | -1 |
| MSTRG. 2062. 3  | 244  | 0. 44417 | 4. 794128418 | 1  |
| MSTRG. 2062. 4  | 227  | 0. 3207  | 5. 095397949 | 1  |
| MSTRG. 2062. 6  | 455  | 0. 37886 | 6. 476745605 | 1  |
| MSTRG. 2062. 5  | 437  | 0. 4352  | 5. 784729004 | -1 |
| MSTRG. 2063. 1  | 137  | 0. 27151 | 10. 49859619 | -1 |
| MSTRG. 2060. 1  | 50   | 0. 43881 | 3. 851257324 | 1  |
| MSTRG. 2068. 4  | 373  | 0. 47024 | 8. 511291504 | 1  |
| MSTRG. 2068. 5  | 370  | 0. 46701 | 8. 210021973 | 1  |
| MSTRG. 2068. 6  | 373  | 0. 47229 | 8. 511291504 | 1  |
| MSTRG. 2068. 7  | 404  | 0. 4508  | 8. 917419434 | 1  |
| MSTRG. 2068. 9  | 401  | 0. 4508  | 8. 793273926 | 1  |
| MSTRG. 2068. 8  | 400  | 0. 3538  | 8. 793273926 | 1  |
| MSTRG. 2070. 1  | 34   | 0. 37011 | 10. 3180542  | 1  |
| MSTRG. 2071. 1  | 106  | 0. 33162 | 5. 436950684 | 1  |
| MSTRG. 2067. 1  | 53   | 0. 41385 | 11. 71990967 | 1  |
| MSTRG. 2067. 2  | 88   | 0. 40667 | 10. 76116943 | 1  |
| MSTRG. 2066. 1  | 35   | 0. 33597 | 4. 529724121 | 1  |
| MSTRG. 2072. 2  | 582  | 0. 33326 | 6. 157165527 | 1  |
| MSTRG. 2079. 1  | 81   | 0. 35996 | 9. 096862793 | 1  |
| MSTRG. 2079. 2  | 15   | 0. 30828 | 9. 996276855 | 1  |
| MSTRG. 2085. 1  | 138  | 0. 44403 | 7. 672058105 | 1  |
| MSTRG. 2085. 2  | 138  | 0. 37792 | 7. 672058105 | 1  |
| MSTRG. 2086. 1  | 45   | 0. 37086 | 8. 200256348 | -1 |
| MSTRG. 2088. 6  | 563  | 0. 46701 | 5. 938049316 | 1  |
| MSTRG. 2088. 4  | 663  | 0. 46483 | 6. 253479004 | 1  |
| MSTRG. 2088. 5  | 701  | 0. 45836 | 6. 674621582 | 1  |
| MSTRG. 2088. 8  | 650  | 0. 37667 | 8. 171203613 | 1  |
| MSTRG. 2083. 1  | 107  | 0. 3182  | 11. 43487549 | 1  |
| MSTRG. 2095. 1  | 401  | 0. 36372 | 9. 725280762 | 1  |
| MSTRG. 2095. 2  | 85   | 0. 4015  | 9. 729064941 | 1  |
| MSTRG. 2098. 1  | 98   | 0. 32485 | 6. 245056152 | 1  |
| MSTRG. 2097. 6  | 2142 | 0. 4599  | 6. 177429199 | 1  |
| MSTRG. 2097. 7  | 1373 | 0. 46426 | 6. 179748535 | 1  |
| MSTRG. 2097. 8  | 1730 | 0. 45277 | 6. 472961426 | 1  |
| MSTRG. 2110. 8  | 1001 | 0. 42027 | 9. 365539551 | 1  |
| MSTRG. 2110. 1  | 1121 | 0. 4229  | 9. 242126465 | 1  |
| MSTRG. 2110. 5  | 1120 | 0. 42495 | 9. 242126465 | 1  |
| MSTRG. 2111. 1  | 82   | 0. 31899 | 9. 342590332 | 1  |
| MSTRG. 2110. 9  | 181  | 0. 28959 | 5. 257385254 | 1  |
| MSTRG. 2112. 1  | 37   | 0. 46271 | 4. 571105957 | 1  |
| MSTRG. 2113. 1  | 67   | 0. 31941 | 9. 256164551 | 1  |
| MSTRG. 2114. 1  | 603  | 0. 45647 | 8. 316223145 | 1  |
| MSTRG. 2116. 1  | 179  | 0. 37869 | 9. 675598145 | -1 |

|                 |      |          |              |    |
|-----------------|------|----------|--------------|----|
| MSTRG. 2114. 2  | 603  | 0. 45385 | 8. 316223145 | 1  |
| MSTRG. 2108. 1  | 75   | 0. 3926  | 9. 575500488 | -1 |
| MSTRG. 2119. 3  | 727  | 0. 42908 | 6. 602111816 | 1  |
| MSTRG. 2118. 1  | 64   | 0. 43813 | 9. 514709473 | -1 |
| MSTRG. 2126. 1  | 106  | 0. 46144 | 5. 215270996 | -1 |
| MSTRG. 2148. 1  | 76   | 0. 3583  | 9. 414489746 | 1  |
| MSTRG. 2152. 1  | 107  | 0. 37661 | 6. 38494873  | 1  |
| MSTRG. 2154. 1  | 66   | 0. 27415 | 7. 889831543 | 1  |
| MSTRG. 2153. 6  | 114  | 0. 27517 | 8. 558654785 | 1  |
| MSTRG. 2153. 3  | 102  | 0. 29594 | 6. 011535645 | 1  |
| MSTRG. 2153. 5  | 102  | 0. 34514 | 6. 011535645 | 1  |
| MSTRG. 2153. 4  | 226  | 0. 27843 | 5. 940856934 | 1  |
| MSTRG. 2153. 7  | 281  | 0. 33238 | 10. 07720947 | 1  |
| MSTRG. 2155. 1  | 914  | 0. 45277 | 7. 16619873  | 1  |
| MSTRG. 2155. 2  | 910  | 0. 46952 | 8. 139465332 | 1  |
| MSTRG. 2155. 3  | 896  | 0. 47937 | 7. 39276123  | 1  |
| MSTRG. 2155. 4  | 915  | 0. 45631 | 8. 139465332 | 1  |
| MSTRG. 2155. 7  | 130  | 0. 43076 | 8. 686462402 | 1  |
| MSTRG. 2155. 8  | 269  | 0. 44566 | 4. 729309082 | 1  |
| MSTRG. 2155. 9  | 135  | 0. 34585 | 11. 24005127 | 1  |
| MSTRG. 2144. 1  | 55   | 0. 36155 | 4. 55657959  | 1  |
| MSTRG. 2145. 1  | 120  | 0. 39711 | 5. 092956543 | 1  |
| MSTRG. 2146. 1  | 115  | 0. 2903  | 8. 66583252  | 1  |
| MSTRG. 2146. 2  | 165  | 0. 29111 | 6. 418151855 | 1  |
| MSTRG. 2175. 1  | 6075 | 0. 45873 | 9. 11505127  | -1 |
| MSTRG. 2175. 2  | 1470 | 0. 45067 | 9. 463684082 | 1  |
| MSTRG. 2177. 2  | 2439 | 0. 44609 | 5. 251647949 | 1  |
| MSTRG. 2177. 1  | 2439 | 0. 46039 | 5. 251647949 | 1  |
| MSTRG. 2177. 6  | 2439 | 0. 45606 | 5. 251647949 | 1  |
| MSTRG. 2177. 4  | 2465 | 0. 45038 | 5. 326477051 | 1  |
| MSTRG. 2177. 7  | 1591 | 0. 36822 | 5. 00189209  | 1  |
| MSTRG. 2177. 8  | 2439 | 0. 44356 | 5. 251647949 | 1  |
| MSTRG. 2177. 10 | 2431 | 0. 47107 | 5. 261535645 | 1  |
| MSTRG. 2177. 12 | 1617 | 0. 41017 | 5. 074401855 | 1  |
| MSTRG. 2177. 11 | 1591 | 0. 4459  | 5. 00189209  | 1  |
| MSTRG. 2157. 1  | 309  | 0. 45197 | 5. 086242676 | 1  |
| MSTRG. 2166. 1  | 32   | 0. 33095 | 8. 885314941 | 1  |
| MSTRG. 2167. 1  | 63   | 0. 41318 | 6. 88873291  | 1  |
| MSTRG. 2179. 2  | 725  | 0. 41061 | 5. 946838379 | 1  |
| MSTRG. 2179. 3  | 725  | 0. 46334 | 5. 946838379 | 1  |
| MSTRG. 2179. 4  | 372  | 0. 39179 | 9. 221618652 | 1  |
| MSTRG. 2200. 2  | 1498 | 0. 41345 | 9. 082702637 | 1  |
| MSTRG. 2200. 3  | 1498 | 0. 39371 | 9. 082702637 | 1  |
| MSTRG. 2200. 5  | 1542 | 0. 41886 | 8. 781433105 | 1  |
| MSTRG. 2201. 1  | 58   | 0. 32854 | 8. 477966309 | 1  |
| MSTRG. 2202. 1  | 69   | 0. 35173 | 9. 30267334  | 1  |
| MSTRG. 2203. 1  | 72   | 0. 29343 | 6. 244445801 | 1  |
| MSTRG. 2210. 3  | 96   | 0. 28644 | 10. 00469971 | 1  |
| MSTRG. 2211. 1  | 75   | 0. 34947 | 7. 735778809 | 1  |
| MSTRG. 2210. 4  | 110  | 0. 30684 | 8. 528137207 | 1  |
| MSTRG. 2212. 1  | 266  | 0. 34547 | 8. 17010498  | 1  |
| MSTRG. 2213. 3  | 180  | 0. 36514 | 9. 26361084  | 1  |
| MSTRG. 2196. 1  | 15   | 0. 31444 | 3. 799377441 | 1  |
| MSTRG. 2219. 1  | 96   | 0. 29367 | 8. 094543457 | 1  |

|                |      |          |              |    |
|----------------|------|----------|--------------|----|
| MSTRG. 2220. 2 | 1214 | 0. 42871 | 5. 910095215 | 1  |
| MSTRG. 2221. 1 | 100  | 0. 29367 | 9. 811340332 | 1  |
| MSTRG. 2221. 2 | 71   | 0. 36201 | 8. 297912598 | 1  |
| MSTRG. 2222. 1 | 76   | 0. 29367 | 8. 557312012 | 1  |
| MSTRG. 2222. 2 | 73   | 0. 28683 | 7. 945739746 | 1  |
| MSTRG. 2220. 3 | 1079 | 0. 34306 | 9. 463439941 | 1  |
| MSTRG. 2220. 4 | 769  | 0. 40078 | 8. 977233887 | 1  |
| MSTRG. 2223. 3 | 37   | 0. 40556 | 6. 511291504 | 1  |
| MSTRG. 2223. 4 | 190  | 0. 29772 | 9. 664611816 | 1  |
| MSTRG. 2223. 5 | 138  | 0. 27433 | 9. 117248535 | 1  |
| MSTRG. 2223. 6 | 190  | 0. 30735 | 9. 664611816 | 1  |
| MSTRG. 2224. 1 | 51   | 0. 36389 | 4. 837219238 | 1  |
| MSTRG. 2225. 1 | 124  | 0. 29644 | 9. 618469238 | 1  |
| MSTRG. 2230. 1 | 29   | 0. 32954 | 11. 73394775 | 1  |
| MSTRG. 2240. 1 | 54   | 0. 39942 | 11. 00860596 | -1 |
| MSTRG. 2241. 1 | 57   | 0. 42528 | 9. 101257324 | -1 |
| MSTRG. 2248. 2 | 413  | 0. 43443 | 6. 679626465 | 1  |
| MSTRG. 2248. 4 | 413  | 0. 35886 | 6. 679626465 | 1  |
| MSTRG. 2248. 6 | 409  | 0. 43059 | 6. 430236816 | -1 |
| MSTRG. 2250. 1 | 115  | 0. 30544 | 6. 500671387 | 1  |
| MSTRG. 2252. 1 | 811  | 0. 37963 | 7. 216369629 | -1 |
| MSTRG. 2257. 2 | 329  | 0. 38395 | 9. 097106934 | 1  |
| MSTRG. 2257. 3 | 349  | 0. 40124 | 8. 458190918 | 1  |
| MSTRG. 2265. 1 | 157  | 0. 31561 | 8. 487854004 | 1  |
| MSTRG. 2265. 2 | 157  | 0. 33131 | 8. 487854004 | 1  |
| MSTRG. 2265. 3 | 157  | 0. 29526 | 8. 487854004 | 1  |
| MSTRG. 2265. 4 | 157  | 0. 39175 | 8. 487854004 | 1  |
| MSTRG. 2265. 6 | 157  | 0. 33131 | 8. 487854004 | 1  |
| MSTRG. 2265. 5 | 157  | 0. 3295  | 8. 487854004 | 1  |
| MSTRG. 2262. 2 | 473  | 0. 40391 | 6. 299621582 | 1  |
| MSTRG. 2268. 4 | 828  | 0. 42251 | 9. 350769043 | 1  |
| MSTRG. 2268. 3 | 1037 | 0. 45786 | 8. 868103027 | 1  |
| MSTRG. 2268. 5 | 812  | 0. 39187 | 9. 351013184 | 1  |
| MSTRG. 2269. 1 | 73   | 0. 34138 | 10. 57415771 | 1  |
| MSTRG. 2273. 1 | 120  | 0. 40051 | 7. 672668457 | 1  |
| MSTRG. 2278. 1 | 48   | 0. 30303 | 7. 549987793 | 1  |
| MSTRG. 2280. 1 | 976  | 0. 38943 | 5. 399841309 | 1  |
| MSTRG. 2281. 1 | 201  | 0. 29848 | 10. 04022217 | 1  |
| MSTRG. 2282. 1 | 47   | 0. 32545 | 5. 95526123  | 1  |
| MSTRG. 2283. 1 | 98   | 0. 39047 | 9. 832702637 | 1  |
| MSTRG. 2284. 1 | 157  | 0. 33075 | 6. 260314941 | 1  |
| MSTRG. 2270. 4 | 378  | 0. 33194 | 9. 682189941 | 1  |
| MSTRG. 2270. 5 | 378  | 0. 30552 | 9. 682189941 | 1  |
| MSTRG. 2288. 1 | 739  | 0. 34756 | 8. 554504395 | 1  |
| MSTRG. 2288. 3 | 673  | 0. 31638 | 8. 499206543 | 1  |
| MSTRG. 2289. 1 | 105  | 0. 30396 | 8. 661071777 | 1  |
| MSTRG. 2285. 1 | 20   | 0. 3524  | 6. 704406738 | -1 |
| MSTRG. 2311. 1 | 38   | 0. 40502 | 6. 51348877  | 1  |
| MSTRG. 2350. 1 | 341  | 0. 37936 | 9. 137878418 | 1  |
| MSTRG. 2352. 2 | 806  | 0. 47928 | 8. 921813965 | 1  |
| MSTRG. 2352. 3 | 358  | 0. 40306 | 5. 79888916  | 1  |
| MSTRG. 2352. 4 | 327  | 0. 35741 | 6. 768249512 | 1  |
| MSTRG. 2355. 1 | 26   | 0. 38684 | 8. 886169434 | 1  |
| MSTRG. 2361. 1 | 933  | 0. 42555 | 7. 346130371 | 1  |

|                 |      |          |              |    |
|-----------------|------|----------|--------------|----|
| MSTRG. 2361. 2  | 926  | 0. 37465 | 7. 346618652 | 1  |
| MSTRG. 2361. 4  | 694  | 0. 36749 | 8. 156311035 | 1  |
| MSTRG. 2361. 5  | 720  | 0. 34495 | 7. 560974121 | 1  |
| MSTRG. 2361. 3  | 694  | 0. 32185 | 8. 156311035 | 1  |
| MSTRG. 2362. 1  | 125  | 0. 3701  | 9. 666931152 | 1  |
| MSTRG. 2364. 1  | 120  | 0. 32237 | 8. 850524902 | 1  |
| MSTRG. 2364. 4  | 429  | 0. 34002 | 9. 137268066 | 1  |
| MSTRG. 2364. 6  | 455  | 0. 31035 | 9. 395935059 | 1  |
| MSTRG. 2365. 1  | 47   | 0. 27433 | 9. 383972168 | 1  |
| MSTRG. 2364. 7  | 525  | 0. 34367 | 6. 388977051 | 1  |
| MSTRG. 2364. 8  | 141  | 0. 28883 | 9. 762634277 | 1  |
| MSTRG. 2364. 9  | 114  | 0. 46915 | 5. 320617676 | 1  |
| MSTRG. 2366. 1  | 217  | 0. 3572  | 9. 182678223 | 1  |
| MSTRG. 2364. 11 | 96   | 0. 29022 | 9. 194641113 | 1  |
| MSTRG. 2371. 1  | 1557 | 0. 44527 | 7. 014831543 | 1  |
| MSTRG. 2381. 1  | 1473 | 0. 38007 | 8. 967712402 | 1  |
| MSTRG. 2381. 10 | 1242 | 0. 37931 | 9. 030822754 | 1  |
| MSTRG. 2381. 7  | 1242 | 0. 38007 | 9. 030822754 | 1  |
| MSTRG. 2381. 4  | 1234 | 0. 37931 | 8. 996398926 | 1  |
| MSTRG. 2381. 6  | 1234 | 0. 37931 | 8. 996398926 | 1  |
| MSTRG. 2381. 5  | 1465 | 0. 41648 | 8. 937194824 | 1  |
| MSTRG. 2381. 2  | 1464 | 0. 39393 | 8. 899597168 | 1  |
| MSTRG. 2381. 3  | 1456 | 0. 38007 | 8. 865661621 | 1  |
| MSTRG. 2381. 9  | 1473 | 0. 37294 | 8. 967712402 | 1  |
| MSTRG. 2381. 13 | 1260 | 0. 38007 | 8. 54107666  | 1  |
| MSTRG. 2381. 12 | 1260 | 0. 37931 | 8. 54107666  | 1  |
| MSTRG. 2381. 15 | 1260 | 0. 37931 | 8. 54107666  | 1  |
| MSTRG. 2381. 17 | 1225 | 0. 37931 | 8. 913757324 | 1  |
| MSTRG. 2381. 16 | 884  | 0. 37574 | 9. 39276123  | 1  |
| MSTRG. 2381. 14 | 1456 | 0. 38007 | 8. 865661621 | 1  |
| MSTRG. 2381. 18 | 1456 | 0. 37294 | 8. 865661621 | 1  |
| MSTRG. 2381. 19 | 863  | 0. 39938 | 9. 532531738 | 1  |
| MSTRG. 2387. 1  | 43   | 0. 43212 | 7. 88470459  | 1  |
| MSTRG. 2385. 1  | 109  | 0. 43035 | 8. 915100098 | 1  |
| MSTRG. 2391. 1  | 28   | 0. 34816 | 5. 193908691 | -1 |
| MSTRG. 2392. 1  | 60   | 0. 38289 | 9. 514343262 | -1 |
| MSTRG. 2398. 5  | 228  | 0. 41991 | 5. 585754395 | 1  |
| MSTRG. 2412. 1  | 115  | 0. 33387 | 5. 731750488 | 1  |
| MSTRG. 2412. 2  | 122  | 0. 33851 | 7. 80255127  | 1  |
| MSTRG. 2412. 3  | 136  | 0. 29367 | 10. 43878174 | 1  |
| MSTRG. 2415. 1  | 237  | 0. 36813 | 8. 157409668 | 1  |
| MSTRG. 2412. 4  | 166  | 0. 31543 | 10. 30926514 | 1  |
| MSTRG. 2417. 1  | 95   | 0. 35007 | 10. 47076416 | 1  |
| MSTRG. 2417. 2  | 90   | 0. 38202 | 9. 694152832 | 1  |
| MSTRG. 2418. 1  | 215  | 0. 30411 | 9. 905822754 | 1  |
| MSTRG. 2419. 2  | 352  | 0. 41152 | 9. 29888916  | 1  |
| MSTRG. 2419. 5  | 145  | 0. 37209 | 10. 58868408 | 1  |
| MSTRG. 2419. 6  | 354  | 0. 41656 | 9. 224304199 | 1  |
| MSTRG. 2419. 4  | 354  | 0. 32591 | 9. 224304199 | 1  |
| MSTRG. 2403. 1  | 81   | 0. 31985 | 9. 159362793 | 1  |
| MSTRG. 2407. 1  | 49   | 0. 40077 | 4. 795227051 | -1 |
| MSTRG. 2426. 1  | 33   | 0. 38905 | 10. 66497803 | 1  |
| MSTRG. 2431. 1  | 23   | 0. 41684 | 12. 00848389 | 1  |
| MSTRG. 2433. 1  | 88   | 0. 40496 | 9. 896057129 | -1 |

|                 |      |          |              |    |
|-----------------|------|----------|--------------|----|
| MSTRG. 2438. 1  | 78   | 0. 36533 | 7. 00970459  | 1  |
| MSTRG. 2439. 4  | 264  | 0. 44462 | 6. 314147949 | 1  |
| MSTRG. 2435. 3  | 372  | 0. 46621 | 5. 296325684 | 1  |
| MSTRG. 2446. 3  | 415  | 0. 41895 | 9. 059753418 | 1  |
| MSTRG. 2447. 1  | 153  | 0. 29539 | 5. 998840332 | 1  |
| MSTRG. 2475. 4  | 564  | 0. 44656 | 5. 505554199 | 1  |
| MSTRG. 2475. 5  | 440  | 0. 44499 | 9. 899597168 | 1  |
| MSTRG. 2476. 1  | 240  | 0. 40967 | 10. 30682373 | 1  |
| MSTRG. 2476. 2  | 71   | 0. 44988 | 6. 172790527 | 1  |
| MSTRG. 2477. 1  | 83   | 0. 43489 | 8. 553161621 | -1 |
| MSTRG. 2479. 4  | 498  | 0. 43104 | 5. 314880371 | 1  |
| MSTRG. 2480. 1  | 109  | 0. 31899 | 8. 977844238 | 1  |
| MSTRG. 2479. 5  | 162  | 0. 45688 | 5. 249816895 | 1  |
| MSTRG. 2479. 6  | 157  | 0. 4483  | 5. 018371582 | 1  |
| MSTRG. 2479. 7  | 157  | 0. 45388 | 5. 018371582 | 1  |
| MSTRG. 2479. 8  | 171  | 0. 45428 | 5. 903625488 | 1  |
| MSTRG. 2479. 9  | 292  | 0. 42524 | 6. 652893066 | 1  |
| MSTRG. 2479. 10 | 278  | 0. 40907 | 5. 94744873  | 1  |
| MSTRG. 2479. 13 | 157  | 0. 44422 | 5. 018493652 | 1  |
| MSTRG. 2479. 14 | 177  | 0. 416   | 5. 604309082 | 1  |
| MSTRG. 2479. 15 | 310  | 0. 39226 | 6. 522888184 | 1  |
| MSTRG. 2479. 16 | 136  | 0. 44298 | 4. 789001465 | 1  |
| MSTRG. 2479. 17 | 50   | 0. 37806 | 6. 700134277 | 1  |
| MSTRG. 2485. 2  | 997  | 0. 4635  | 5. 388366699 | 1  |
| MSTRG. 2485. 3  | 1031 | 0. 4635  | 5. 583312988 | 1  |
| MSTRG. 2460. 1  | 681  | 0. 46948 | 6. 112487793 | 1  |
| MSTRG. 2464. 2  | 163  | 0. 28584 | 8. 202087402 | 1  |
| MSTRG. 2468. 1  | 152  | 0. 3287  | 7. 733093262 | 1  |
| MSTRG. 2489. 3  | 213  | 0. 36783 | 9. 352478027 | 1  |
| MSTRG. 2492. 2  | 878  | 0. 43415 | 6. 88885498  | 1  |
| MSTRG. 2493. 1  | 587  | 0. 44716 | 7. 825134277 | 1  |
| MSTRG. 2498. 2  | 558  | 0. 3208  | 9. 095153809 | 1  |
| MSTRG. 2509. 3  | 258  | 0. 33406 | 7. 294250488 | 1  |
| MSTRG. 2509. 5  | 485  | 0. 43577 | 8. 914245605 | 1  |
| MSTRG. 2509. 4  | 258  | 0. 37345 | 7. 294250488 | 1  |
| MSTRG. 2510. 1  | 113  | 0. 37743 | 11. 60028076 | 1  |
| MSTRG. 2510. 2  | 113  | 0. 39035 | 11. 60028076 | 1  |
| MSTRG. 2513. 3  | 115  | 0. 31105 | 5. 624084473 | 1  |
| MSTRG. 2513. 5  | 75   | 0. 31553 | 8. 741394043 | 1  |
| MSTRG. 2514. 3  | 46   | 0. 37064 | 7. 857727051 | 1  |
| MSTRG. 2515. 1  | 143  | 0. 32974 | 11. 67718506 | 1  |
| MSTRG. 2499. 1  | 54   | 0. 34571 | 10. 30621338 | -1 |
| MSTRG. 2508. 1  | 418  | 0. 33863 | 7. 008483887 | 1  |
| MSTRG. 2517. 2  | 656  | 0. 44662 | 7. 860534668 | 1  |
| MSTRG. 2517. 3  | 590  | 0. 45189 | 6. 762512207 | 1  |
| MSTRG. 2519. 3  | 862  | 0. 39301 | 5. 993103027 | 1  |
| MSTRG. 2519. 4  | 863  | 0. 39301 | 6. 058532715 | 1  |
| MSTRG. 2529. 1  | 1038 | 0. 36749 | 5. 913146973 | 1  |
| MSTRG. 2529. 2  | 53   | 0. 33783 | 5. 661315918 | 1  |
| MSTRG. 2530. 1  | 62   | 0. 32485 | 10. 00604248 | 1  |
| MSTRG. 2566. 1  | 127  | 0. 34564 | 12. 60296631 | 1  |
| MSTRG. 2567. 1  | 44   | 0. 30625 | 10. 25604248 | 1  |
| MSTRG. 2568. 2  | 66   | 0. 33285 | 3. 929870605 | 1  |
| MSTRG. 2569. 1  | 721  | 0. 47188 | 5. 285583496 | 1  |

|                 |      |          |              |    |
|-----------------|------|----------|--------------|----|
| MSTRG. 2569. 2  | 584  | 0. 41997 | 6. 164611816 | 1  |
| MSTRG. 2569. 4  | 584  | 0. 35549 | 6. 164611816 | 1  |
| MSTRG. 2569. 6  | 178  | 0. 45893 | 9. 29876709  | 1  |
| MSTRG. 2569. 5  | 584  | 0. 43642 | 6. 164611816 | 1  |
| MSTRG. 2572. 1  | 128  | 0. 35406 | 10. 02423096 | 1  |
| MSTRG. 2569. 7  | 2693 | 0. 39062 | 5. 933166504 | 1  |
| MSTRG. 2569. 8  | 2693 | 0. 41258 | 5. 933166504 | 1  |
| MSTRG. 2569. 9  | 2693 | 0. 47601 | 5. 933166504 | 1  |
| MSTRG. 2575. 1  | 58   | 0. 29639 | 9. 019592285 | 1  |
| MSTRG. 2576. 4  | 89   | 0. 45999 | 4. 808166504 | -1 |
| MSTRG. 2576. 3  | 423  | 0. 3231  | 5. 793029785 | 1  |
| MSTRG. 2577. 1  | 183  | 0. 38161 | 10. 98162842 | 1  |
| MSTRG. 2576. 5  | 447  | 0. 3888  | 6. 53338623  | 1  |
| MSTRG. 2576. 6  | 100  | 0. 30807 | 8. 859069824 | 1  |
| MSTRG. 2576. 7  | 93   | 0. 29615 | 10. 00872803 | 1  |
| MSTRG. 2579. 2  | 1314 | 0. 42145 | 9. 053039551 | 1  |
| MSTRG. 2579. 3  | 671  | 0. 47072 | 5. 895446777 | 1  |
| MSTRG. 2541. 2  | 76   | 0. 42799 | 6. 817687988 | 1  |
| MSTRG. 2542. 1  | 66   | 0. 3847  | 11. 00006104 | 1  |
| MSTRG. 2543. 1  | 42   | 0. 34996 | 7. 741516113 | 1  |
| MSTRG. 2544. 1  | 49   | 0. 30387 | 10. 29510498 | 1  |
| MSTRG. 2545. 1  | 76   | 0. 26931 | 9. 965026855 | 1  |
| MSTRG. 2536. 1  | 53   | 0. 40522 | 6. 491271973 | 1  |
| MSTRG. 2540. 1  | 82   | 0. 3484  | 6. 229309082 | 1  |
| MSTRG. 2561. 4  | 225  | 0. 45552 | 4. 509338379 | 1  |
| MSTRG. 2564. 3  | 428  | 0. 42431 | 7. 539855957 | 1  |
| MSTRG. 2582. 2  | 302  | 0. 31137 | 8. 374572754 | 1  |
| MSTRG. 2582. 3  | 302  | 0. 31137 | 8. 374572754 | 1  |
| MSTRG. 2588. 1  | 85   | 0. 31151 | 12. 05914307 | 1  |
| MSTRG. 2589. 2  | 341  | 0. 32729 | 5. 455749512 | 1  |
| MSTRG. 2589. 3  | 91   | 0. 30648 | 11. 89239502 | 1  |
| MSTRG. 2589. 4  | 312  | 0. 45938 | 5. 05291748  | 1  |
| MSTRG. 2590. 2  | 64   | 0. 38872 | 6. 792175293 | 1  |
| MSTRG. 2590. 1  | 64   | 0. 38467 | 6. 792175293 | 1  |
| MSTRG. 2590. 3  | 64   | 0. 37002 | 6. 792175293 | 1  |
| MSTRG. 2591. 5  | 84   | 0. 3333  | 10. 06829834 | 1  |
| MSTRG. 2591. 6  | 39   | 0. 41495 | 4. 780456543 | 1  |
| MSTRG. 2594. 1  | 414  | 0. 48838 | 6. 127624512 | 1  |
| MSTRG. 2596. 4  | 1723 | 0. 44252 | 5. 932922363 | 1  |
| MSTRG. 2596. 3  | 2042 | 0. 43134 | 6. 184875488 | 1  |
| MSTRG. 2597. 2  | 37   | 0. 33159 | 9. 49810791  | 1  |
| MSTRG. 2597. 1  | 37   | 0. 35804 | 9. 49810791  | 1  |
| MSTRG. 2598. 1  | 37   | 0. 44865 | 4. 889099121 | -1 |
| MSTRG. 2602. 1  | 92   | 0. 35111 | 7. 852844238 | 1  |
| MSTRG. 2602. 2  | 92   | 0. 34825 | 7. 852844238 | 1  |
| MSTRG. 2602. 3  | 92   | 0. 34648 | 5. 951965332 | 1  |
| MSTRG. 2602. 10 | 92   | 0. 30576 | 7. 852844238 | 1  |
| MSTRG. 2602. 11 | 92   | 0. 30576 | 7. 852844238 | 1  |
| MSTRG. 2602. 12 | 92   | 0. 28683 | 7. 852844238 | 1  |
| MSTRG. 2601. 1  | 47   | 0. 40387 | 11. 21966553 | 1  |
| MSTRG. 2601. 2  | 73   | 0. 42428 | 4. 493469238 | 1  |
| MSTRG. 2605. 3  | 527  | 0. 36459 | 9. 527526855 | 1  |
| MSTRG. 2605. 4  | 527  | 0. 35591 | 9. 527526855 | 1  |
| MSTRG. 2605. 5  | 3096 | 0. 46306 | 6. 434997559 | 1  |

|                 |      |          |              |    |
|-----------------|------|----------|--------------|----|
| MSTRG. 2605. 6  | 527  | 0. 35591 | 9. 527526855 | 1  |
| MSTRG. 2605. 7  | 3256 | 0. 43802 | 6. 577941895 | 1  |
| MSTRG. 2605. 8  | 1383 | 0. 45778 | 6. 588439941 | 1  |
| MSTRG. 2605. 10 | 2055 | 0. 47443 | 6. 002624512 | 1  |
| MSTRG. 2605. 9  | 1445 | 0. 4532  | 6. 12701416  | 1  |
| MSTRG. 2605. 11 | 680  | 0. 44437 | 5. 768371582 | 1  |
| MSTRG. 2609. 7  | 987  | 0. 37332 | 8. 54876709  | 1  |
| MSTRG. 2609. 8  | 975  | 0. 37332 | 8. 701599121 | 1  |
| MSTRG. 2609. 9  | 987  | 0. 39312 | 8. 54876709  | 1  |
| MSTRG. 2610. 2  | 83   | 0. 27517 | 10. 38800049 | 1  |
| MSTRG. 2611. 1  | 188  | 0. 30807 | 5. 213684082 | 1  |
| MSTRG. 2607. 3  | 399  | 0. 43603 | 6. 93157959  | 1  |
| MSTRG. 2682. 1  | 163  | 0. 34157 | 7. 659973145 | 1  |
| MSTRG. 2614. 1  | 35   | 0. 41719 | 7. 934143066 | 1  |
| MSTRG. 2632. 1  | 33   | 0. 38056 | 10. 11859131 | 1  |
| MSTRG. 2633. 1  | 60   | 0. 40635 | 9. 381652832 | -1 |
| MSTRG. 2634. 3  | 86   | 0. 42453 | 10. 4019165  | 1  |
| MSTRG. 2635. 1  | 142  | 0. 30191 | 7. 838562012 | 1  |
| MSTRG. 2636. 1  | 66   | 0. 37248 | 10. 16790771 | 1  |
| MSTRG. 2638. 1  | 33   | 0. 39497 | 7. 935119629 | 1  |
| MSTRG. 2639. 1  | 617  | 0. 34763 | 9. 293273926 | 1  |
| MSTRG. 2640. 1  | 108  | 0. 28157 | 5. 668762207 | 1  |
| MSTRG. 2641. 1  | 91   | 0. 28178 | 8. 592834473 | 1  |
| MSTRG. 2642. 1  | 59   | 0. 36459 | 7. 895690918 | 1  |
| MSTRG. 2645. 1  | 75   | 0. 29452 | 12. 23480225 | 1  |
| MSTRG. 2645. 2  | 91   | 0. 30981 | 10. 01519775 | 1  |
| MSTRG. 2645. 3  | 67   | 0. 3     | 8. 570007324 | 1  |
| MSTRG. 2647. 1  | 28   | 0. 31501 | 9. 983947754 | 1  |
| MSTRG. 2647. 2  | 104  | 0. 39951 | 7. 565612793 | 1  |
| MSTRG. 2649. 1  | 78   | 0. 35529 | 6. 348815918 | 1  |
| MSTRG. 2668. 3  | 1716 | 0. 36918 | 7. 540710449 | 1  |
| MSTRG. 2668. 4  | 1709 | 0. 36918 | 7. 540710449 | 1  |
| MSTRG. 2668. 5  | 1841 | 0. 36298 | 8. 284851074 | 1  |
| MSTRG. 2668. 6  | 1260 | 0. 36453 | 8. 515319824 | 1  |
| MSTRG. 2668. 7  | 1260 | 0. 37773 | 8. 515319824 | 1  |
| MSTRG. 2706. 2  | 269  | 0. 46006 | 6. 405212402 | 1  |
| MSTRG. 2706. 3  | 329  | 0. 44072 | 5. 968688965 | 1  |
| MSTRG. 2711. 3  | 76   | 0. 36065 | 10. 11541748 | 1  |
| MSTRG. 2711. 4  | 99   | 0. 34376 | 9. 410583496 | 1  |
| MSTRG. 2714. 3  | 346  | 0. 442   | 7. 61529541  | 1  |
| MSTRG. 2714. 4  | 405  | 0. 31973 | 6. 812316895 | 1  |
| MSTRG. 2715. 1  | 1315 | 0. 46485 | 5. 638122559 | 1  |
| MSTRG. 2715. 4  | 1315 | 0. 45629 | 5. 638122559 | 1  |
| MSTRG. 2715. 5  | 728  | 0. 46178 | 5. 821228027 | 1  |
| MSTRG. 2717. 2  | 331  | 0. 3183  | 9. 129455566 | 1  |
| MSTRG. 2720. 1  | 74   | 0. 36894 | 9. 88470459  | 1  |
| MSTRG. 2721. 2  | 144  | 0. 44944 | 9. 55267334  | 1  |
| MSTRG. 2721. 3  | 144  | 0. 38185 | 9. 55267334  | 1  |
| MSTRG. 2724. 3  | 371  | 0. 34006 | 6. 358093262 | 1  |
| MSTRG. 2740. 1  | 720  | 0. 42311 | 7. 312194824 | 1  |
| MSTRG. 2742. 1  | 259  | 0. 40941 | 6. 097473145 | 1  |
| MSTRG. 2742. 4  | 305  | 0. 43011 | 6. 457214355 | 1  |
| MSTRG. 2742. 5  | 305  | 0. 43562 | 6. 457214355 | 1  |
| MSTRG. 2730. 2  | 433  | 0. 45701 | 4. 899108887 | 1  |



|                 |      |          |              |    |
|-----------------|------|----------|--------------|----|
| MSTRG. 2732. 1  | 325  | 0. 34111 | 5. 824645996 | 1  |
| MSTRG. 2732. 2  | 278  | 0. 37205 | 5. 083190918 | 1  |
| MSTRG. 2732. 5  | 327  | 0. 39644 | 4. 937438965 | 1  |
| MSTRG. 2743. 1  | 194  | 0. 3801  | 8. 81842041  | 1  |
| MSTRG. 2744. 1  | 59   | 0. 386   | 6. 81451416  | 1  |
| MSTRG. 2747. 4  | 343  | 0. 46801 | 6. 34576416  | 1  |
| MSTRG. 2750. 1  | 90   | 0. 35017 | 6. 674255371 | 1  |
| MSTRG. 2750. 2  | 63   | 0. 36174 | 6. 886657715 | 1  |
| MSTRG. 2750. 3  | 67   | 0. 3593  | 9. 245544434 | 1  |
| MSTRG. 2749. 5  | 1025 | 0. 44468 | 5. 470397949 | 1  |
| MSTRG. 2757. 1  | 87   | 0. 41104 | 11. 42242432 | 1  |
| MSTRG. 2761. 1  | 45   | 0. 4206  | 12. 48284912 | 1  |
| MSTRG. 2762. 1  | 53   | 0. 36207 | 7. 900085449 | 1  |
| MSTRG. 2766. 2  | 495  | 0. 45742 | 8. 558410645 | 1  |
| MSTRG. 2770. 1  | 71   | 0. 39397 | 8. 45123291  | -1 |
| MSTRG. 2771. 3  | 135  | 0. 34685 | 9. 496154785 | 1  |
| MSTRG. 2771. 2  | 147  | 0. 34952 | 9. 788269043 | 1  |
| MSTRG. 2772. 1  | 480  | 0. 35342 | 7. 202331543 | 1  |
| MSTRG. 2774. 2  | 421  | 0. 46951 | 9. 514099121 | 1  |
| MSTRG. 2774. 3  | 405  | 0. 45747 | 9. 499450684 | 1  |
| MSTRG. 2775. 1  | 110  | 0. 32314 | 7. 803771973 | 1  |
| MSTRG. 2777. 3  | 746  | 0. 49464 | 8. 119934082 | 1  |
| MSTRG. 2778. 1  | 32   | 0. 39345 | 10. 29986572 | 1  |
| MSTRG. 2778. 2  | 30   | 0. 44977 | 10. 29986572 | 1  |
| MSTRG. 2804. 3  | 45   | 0. 35417 | 11. 73394775 | 1  |
| MSTRG. 2806. 5  | 419  | 0. 33998 | 9. 541809082 | 1  |
| MSTRG. 2806. 6  | 403  | 0. 36179 | 9. 492736816 | 1  |
| MSTRG. 2806. 7  | 297  | 0. 31    | 8. 914489746 | 1  |
| MSTRG. 2806. 8  | 59   | 0. 35377 | 8. 24786377  | -1 |
| MSTRG. 2807. 1  | 151  | 0. 29367 | 11. 00006104 | 1  |
| MSTRG. 2808. 1  | 51   | 0. 38785 | 9. 299255371 | 1  |
| MSTRG. 2809. 1  | 108  | 0. 29367 | 5. 897644043 | 1  |
| MSTRG. 2810. 2  | 381  | 0. 3564  | 8. 919128418 | 1  |
| MSTRG. 2811. 8  | 291  | 0. 37508 | 7. 843688965 | 1  |
| MSTRG. 2811. 10 | 238  | 0. 41424 | 6. 23248291  | 1  |
| MSTRG. 2788. 4  | 562  | 0. 35599 | 8. 818664551 | 1  |
| MSTRG. 2788. 5  | 589  | 0. 35019 | 8. 717102051 | 1  |
| MSTRG. 2788. 6  | 586  | 0. 45645 | 8. 765808105 | 1  |
| MSTRG. 2788. 7  | 565  | 0. 4524  | 8. 773498535 | 1  |
| MSTRG. 2793. 3  | 211  | 0. 37329 | 7. 035095215 | 1  |
| MSTRG. 2798. 2  | 573  | 0. 32446 | 5. 002258301 | 1  |
| MSTRG. 2822. 10 | 1061 | 0. 41852 | 6. 21295166  | 1  |
| MSTRG. 2822. 6  | 2006 | 0. 45981 | 8. 804504395 | 1  |
| MSTRG. 2829. 1  | 501  | 0. 44114 | 6. 491882324 | 1  |
| MSTRG. 2830. 1  | 115  | 0. 32589 | 6. 63885498  | 1  |
| MSTRG. 2799. 1  | 558  | 0. 35898 | 9. 890563965 | 1  |
| MSTRG. 2800. 2  | 720  | 0. 38204 | 8. 819030762 | 1  |
| MSTRG. 2817. 1  | 95   | 0. 31209 | 9. 780212402 | 1  |
| MSTRG. 2819. 1  | 82   | 0. 39781 | 9. 741882324 | 1  |
| MSTRG. 2819. 2  | 82   | 0. 40978 | 9. 741882324 | 1  |
| MSTRG. 2819. 3  | 71   | 0. 42144 | 8. 573181152 | 1  |
| MSTRG. 2819. 4  | 100  | 0. 34408 | 8. 83782959  | 1  |
| MSTRG. 2820. 2  | 121  | 0. 27807 | 12. 04864502 | 1  |
| MSTRG. 2820. 3  | 375  | 0. 36864 | 6. 299743652 | 1  |

|                |      |          |              |    |
|----------------|------|----------|--------------|----|
| MSTRG. 2816. 4 | 348  | 0. 32801 | 9. 072814941 | 1  |
| MSTRG. 2816. 3 | 348  | 0. 32801 | 9. 072814941 | 1  |
| MSTRG. 2816. 1 | 348  | 0. 32801 | 9. 072814941 | 1  |
| MSTRG. 2816. 5 | 112  | 0. 3143  | 9. 078918457 | 1  |
| MSTRG. 2814. 1 | 45   | 0. 31165 | 4. 649353027 | 1  |
| MSTRG. 2821. 2 | 932  | 0. 45136 | 5. 131652832 | 1  |
| MSTRG. 2821. 3 | 817  | 0. 48087 | 5. 60723877  | 1  |
| MSTRG. 2833. 3 | 630  | 0. 4176  | 6. 282409668 | 1  |
| MSTRG. 2833. 4 | 144  | 0. 31153 | 9. 97076416  | 1  |
| MSTRG. 2833. 5 | 228  | 0. 32686 | 9. 949401855 | 1  |
| MSTRG. 2836. 2 | 717  | 0. 44731 | 4. 614074707 | 1  |
| MSTRG. 2837. 1 | 205  | 0. 28567 | 5. 309631348 | 1  |
| MSTRG. 2837. 2 | 205  | 0. 30877 | 5. 309631348 | 1  |
| MSTRG. 2843. 2 | 110  | 0. 44524 | 3. 701721191 | 1  |
| MSTRG. 2840. 3 | 293  | 0. 39437 | 5. 698181152 | 1  |
| MSTRG. 2848. 2 | 882  | 0. 45436 | 5. 882263184 | 1  |
| MSTRG. 2848. 3 | 882  | 0. 4806  | 5. 882263184 | 1  |
| MSTRG. 2848. 4 | 362  | 0. 44585 | 5. 476745605 | -1 |
| MSTRG. 2848. 6 | 690  | 0. 39029 | 5. 884338379 | 1  |
| MSTRG. 2848. 7 | 44   | 0. 4099  | 9. 489196777 | 1  |
| MSTRG. 2845. 1 | 191  | 0. 37952 | 11. 73248291 | 1  |
| MSTRG. 2845. 2 | 164  | 0. 36108 | 11. 75469971 | 1  |
| MSTRG. 2850. 5 | 145  | 0. 29152 | 9. 508605957 | 1  |
| MSTRG. 2850. 4 | 239  | 0. 29576 | 6. 399475098 | 1  |
| MSTRG. 2850. 6 | 88   | 0. 31193 | 12. 00384521 | 1  |
| MSTRG. 2850. 7 | 247  | 0. 33243 | 9. 258605957 | 1  |
| MSTRG. 2850. 8 | 236  | 0. 30644 | 8. 755432129 | 1  |
| MSTRG. 2846. 1 | 72   | 0. 3619  | 9. 737121582 | 1  |
| MSTRG. 2857. 2 | 572  | 0. 40358 | 8. 381530762 | 1  |
| MSTRG. 2857. 4 | 273  | 0. 39656 | 9. 075378418 | 1  |
| MSTRG. 2852. 4 | 416  | 0. 28247 | 9. 702087402 | 1  |
| MSTRG. 2852. 3 | 416  | 0. 28247 | 9. 702087402 | 1  |
| MSTRG. 2858. 2 | 241  | 0. 3635  | 8. 266906738 | 1  |
| MSTRG. 2859. 1 | 102  | 0. 37206 | 6. 813781738 | 1  |
| MSTRG. 2865. 3 | 583  | 0. 37643 | 8. 237365723 | 1  |
| MSTRG. 2866. 8 | 422  | 0. 48845 | 5. 24798584  | 1  |
| MSTRG. 2871. 1 | 424  | 0. 40929 | 4. 737976074 | 1  |
| MSTRG. 2873. 1 | 167  | 0. 28842 | 4. 473449707 | 1  |
| MSTRG. 2870. 1 | 441  | 0. 41492 | 6. 81048584  | 1  |
| MSTRG. 2879. 1 | 258  | 0. 40464 | 6. 504455566 | 1  |
| MSTRG. 2879. 3 | 194  | 0. 4489  | 5. 660461426 | 1  |
| MSTRG. 2884. 3 | 453  | 0. 414   | 5. 220397949 | 1  |
| MSTRG. 2889. 3 | 99   | 0. 36389 | 8. 493713379 | 1  |
| MSTRG. 2889. 4 | 99   | 0. 32504 | 8. 493713379 | 1  |
| MSTRG. 2894. 2 | 8    | 0. 29335 | 5. 58770752  | -1 |
| MSTRG. 2897. 1 | 449  | 0. 40753 | 4. 921691895 | 1  |
| MSTRG. 2898. 2 | 1078 | 0. 42979 | 8. 762878418 | 1  |
| MSTRG. 2898. 1 | 1095 | 0. 42979 | 8. 718078613 | 1  |
| MSTRG. 2899. 1 | 135  | 0. 33715 | 6. 042663574 | 1  |
| MSTRG. 2899. 3 | 132  | 0. 38466 | 6. 042663574 | 1  |
| MSTRG. 2899. 2 | 135  | 0. 34335 | 6. 042663574 | 1  |
| MSTRG. 2898. 4 | 445  | 0. 42144 | 9. 421813965 | 1  |
| MSTRG. 2900. 4 | 261  | 0. 41059 | 9. 452819824 | 1  |
| MSTRG. 2900. 5 | 92   | 0. 44693 | 9. 979797363 | 1  |

|                |      |          |              |    |
|----------------|------|----------|--------------|----|
| MSTRG. 2906. 4 | 1594 | 0. 40947 | 7. 442565918 | 1  |
| MSTRG. 2906. 5 | 1064 | 0. 41392 | 7. 49822998  | 1  |
| MSTRG. 2907. 3 | 516  | 0. 37748 | 7. 74810791  | 1  |
| MSTRG. 2909. 1 | 133  | 0. 39452 | 6. 727844238 | 1  |
| MSTRG. 2909. 2 | 133  | 0. 45408 | 6. 727844238 | 1  |
| MSTRG. 2910. 1 | 241  | 0. 30349 | 9. 721618652 | 1  |
| MSTRG. 2910. 4 | 241  | 0. 35674 | 9. 721618652 | 1  |
| MSTRG. 2912. 2 | 346  | 0. 47626 | 4. 780212402 | 1  |
| MSTRG. 2913. 1 | 40   | 0. 3478  | 6. 071960449 | 1  |
| MSTRG. 2914. 1 | 264  | 0. 45162 | 9. 202331543 | 1  |
| MSTRG. 2914. 2 | 264  | 0. 4429  | 9. 202331543 | 1  |
| MSTRG. 2921. 1 | 102  | 0. 39165 | 9. 075622559 | -1 |
| MSTRG. 2922. 1 | 114  | 0. 41582 | 8. 804016113 | 1  |
| MSTRG. 2922. 2 | 69   | 0. 41288 | 9. 098937988 | 1  |
| MSTRG. 2920. 1 | 29   | 0. 38359 | 4. 649353027 | 1  |
| MSTRG. 2924. 2 | 1302 | 0. 45139 | 6. 723083496 | 1  |
| MSTRG. 2924. 3 | 824  | 0. 41936 | 6. 062805176 | 1  |
| MSTRG. 2927. 3 | 370  | 0. 312   | 11. 98956299 | 1  |
| MSTRG. 2932. 2 | 596  | 0. 41155 | 6. 041931152 | 1  |
| MSTRG. 2932. 6 | 219  | 0. 35426 | 5. 437927246 | 1  |
| MSTRG. 2929. 1 | 71   | 0. 41734 | 12. 39923096 | 1  |
| MSTRG. 2935. 3 | 563  | 0. 47855 | 4. 759338379 | 1  |
| MSTRG. 2943. 3 | 234  | 0. 41207 | 4. 485900879 | 1  |
| MSTRG. 2943. 4 | 137  | 0. 38114 | 4. 104553223 | 1  |
| MSTRG. 2943. 5 | 137  | 0. 41354 | 4. 104553223 | 1  |
| MSTRG. 2943. 7 | 137  | 0. 38519 | 4. 104553223 | 1  |
| MSTRG. 2943. 6 | 274  | 0. 43369 | 4. 694396973 | 1  |
| MSTRG. 2950. 1 | 422  | 0. 37652 | 7. 163146973 | 1  |
| MSTRG. 2950. 2 | 422  | 0. 43795 | 7. 163146973 | 1  |
| MSTRG. 2950. 3 | 444  | 0. 3663  | 8. 52130127  | 1  |
| MSTRG. 2951. 1 | 78   | 0. 43961 | 9. 149719238 | 1  |
| MSTRG. 2956. 4 | 306  | 0. 36935 | 5. 550720215 | 1  |
| MSTRG. 2956. 5 | 306  | 0. 36935 | 5. 550720215 | 1  |
| MSTRG. 2956. 6 | 702  | 0. 37087 | 6. 405212402 | 1  |
| MSTRG. 2956. 7 | 702  | 0. 40836 | 6. 405212402 | 1  |
| MSTRG. 2957. 1 | 111  | 0. 2765  | 9. 807312012 | 1  |
| MSTRG. 2948. 3 | 527  | 0. 32531 | 4. 97454834  | 1  |
| MSTRG. 2960. 1 | 49   | 0. 3294  | 5. 99432373  | 1  |
| MSTRG. 2968. 1 | 263  | 0. 3556  | 9. 345031738 | 1  |
| MSTRG. 2968. 2 | 126  | 0. 3556  | 8. 375671387 | 1  |
| MSTRG. 2968. 3 | 292  | 0. 36769 | 9. 389099121 | 1  |
| MSTRG. 2973. 1 | 159  | 0. 45771 | 7. 12310791  | 1  |
| MSTRG. 2978. 3 | 722  | 0. 46117 | 6. 556091309 | 1  |
| MSTRG. 2978. 1 | 712  | 0. 4033  | 7. 147766113 | 1  |
| MSTRG. 2978. 2 | 678  | 0. 44883 | 6. 846252441 | 1  |
| MSTRG. 2979. 1 | 35   | 0. 30501 | 10. 90313721 | 1  |
| MSTRG. 2980. 1 | 81   | 0. 30857 | 9. 968566895 | -1 |
| MSTRG. 2983. 1 | 121  | 0. 31869 | 10. 58453369 | -1 |
| MSTRG. 2995. 1 | 90   | 0. 39726 | 9. 997009277 | 1  |
| MSTRG. 2996. 3 | 334  | 0. 39832 | 6. 836486816 | 1  |
| MSTRG. 2996. 4 | 333  | 0. 39612 | 6. 836486816 | 1  |
| MSTRG. 3004. 4 | 345  | 0. 44482 | 6. 493103027 | 1  |
| MSTRG. 3004. 6 | 465  | 0. 44451 | 5. 344421387 | 1  |
| MSTRG. 3004. 7 | 355  | 0. 40694 | 6. 935119629 | 1  |

|                 |     |          |              |   |
|-----------------|-----|----------|--------------|---|
| MSTRG. 3001. 1  | 229 | 0. 37623 | 4. 848693848 | 1 |
| MSTRG. 3012. 4  | 350 | 0. 44906 | 8. 426086426 | 1 |
| MSTRG. 3012. 5  | 364 | 0. 43342 | 8. 919494629 | 1 |
| MSTRG. 3012. 6  | 350 | 0. 43054 | 8. 426086426 | 1 |
| MSTRG. 3017. 3  | 155 | 0. 31065 | 10. 10748291 | 1 |
| MSTRG. 3017. 7  | 155 | 0. 33547 | 10. 10748291 | 1 |
| MSTRG. 3014. 2  | 344 | 0. 46762 | 5. 023742676 | 1 |
| MSTRG. 3021. 2  | 487 | 0. 45443 | 8. 923400879 | 1 |
| MSTRG. 3026. 1  | 42  | 0. 47084 | 9. 382629395 | 1 |
| MSTRG. 3027. 2  | 452 | 0. 36523 | 9. 999938965 | 1 |
| MSTRG. 3027. 3  | 388 | 0. 36523 | 9. 294616699 | 1 |
| MSTRG. 3027. 4  | 128 | 0. 36147 | 6. 557678223 | 1 |
| MSTRG. 3028. 1  | 253 | 0. 36364 | 5. 596130371 | 1 |
| MSTRG. 3028. 2  | 146 | 0. 30576 | 5. 931213379 | 1 |
| MSTRG. 3028. 3  | 153 | 0. 37649 | 7. 702697754 | 1 |
| MSTRG. 3028. 4  | 153 | 0. 31786 | 7. 702697754 | 1 |
| MSTRG. 3028. 5  | 159 | 0. 4495  | 8. 968078613 | 1 |
| MSTRG. 3029. 1  | 68  | 0. 33125 | 9. 221252441 | 1 |
| MSTRG. 3031. 6  | 876 | 0. 37739 | 11. 89923096 | 1 |
| MSTRG. 3031. 10 | 875 | 0. 37793 | 11. 91119385 | 1 |
| MSTRG. 3031. 7  | 861 | 0. 37739 | 11. 90423584 | 1 |
| MSTRG. 3031. 9  | 875 | 0. 37739 | 11. 91119385 | 1 |
| MSTRG. 3036. 2  | 183 | 0. 39019 | 4. 349182129 | 1 |
| MSTRG. 3037. 1  | 420 | 0. 45151 | 8. 062194824 | 1 |
| MSTRG. 3037. 5  | 406 | 0. 42331 | 8. 391052246 | 1 |
| MSTRG. 3037. 6  | 359 | 0. 46452 | 8. 788513184 | 1 |
| MSTRG. 3039. 3  | 335 | 0. 36695 | 9. 762512207 | 1 |
| MSTRG. 3043. 1  | 262 | 0. 28443 | 11. 26153564 | 1 |
| MSTRG. 3043. 7  | 213 | 0. 28596 | 11. 45635986 | 1 |
| MSTRG. 3043. 4  | 111 | 0. 36813 | 4. 392028809 | 1 |
| MSTRG. 3043. 6  | 135 | 0. 3684  | 10. 45721436 | 1 |
| MSTRG. 3043. 3  | 111 | 0. 30078 | 4. 392028809 | 1 |
| MSTRG. 3043. 10 | 167 | 0. 27234 | 11. 75909424 | 1 |
| MSTRG. 3043. 11 | 166 | 0. 27234 | 11. 75909424 | 1 |
| MSTRG. 3043. 12 | 166 | 0. 26982 | 11. 75909424 | 1 |
| MSTRG. 3043. 9  | 110 | 0. 36978 | 4. 392028809 | 1 |
| MSTRG. 3043. 13 | 93  | 0. 30186 | 4. 514709473 | 1 |
| MSTRG. 3042. 1  | 51  | 0. 33808 | 4. 93572998  | 1 |
| MSTRG. 3050. 1  | 44  | 0. 32889 | 10. 40875244 | 1 |
| MSTRG. 3054. 2  | 227 | 0. 42639 | 8. 187927246 | 1 |
| MSTRG. 3055. 2  | 155 | 0. 34559 | 10. 25531006 | 1 |
| MSTRG. 3044. 2  | 758 | 0. 39965 | 9. 644958496 | 1 |
| MSTRG. 3056. 2  | 177 | 0. 3985  | 9. 639099121 | 1 |
| MSTRG. 3059. 1  | 880 | 0. 4559  | 6. 199645996 | 1 |
| MSTRG. 3060. 1  | 349 | 0. 3208  | 9. 405334473 | 1 |
| MSTRG. 3061. 1  | 61  | 0. 29637 | 9. 146911621 | 1 |
| MSTRG. 3061. 2  | 61  | 0. 3663  | 9. 146911621 | 1 |
| MSTRG. 3064. 6  | 633 | 0. 4129  | 8. 225891113 | 1 |
| MSTRG. 3064. 5  | 507 | 0. 3439  | 5. 236999512 | 1 |
| MSTRG. 3066. 1  | 117 | 0. 35145 | 11. 0848999  | 1 |
| MSTRG. 3068. 4  | 665 | 0. 44454 | 7. 594787598 | 1 |
| MSTRG. 3068. 5  | 665 | 0. 44262 | 7. 594787598 | 1 |
| MSTRG. 3068. 3  | 665 | 0. 4513  | 7. 594787598 | 1 |
| MSTRG. 3065. 1  | 14  | 0. 42858 | 10. 85992432 | 1 |

|                 |      |          |              |    |
|-----------------|------|----------|--------------|----|
| MSTRG. 3070. 1  | 115  | 0. 34694 | 5. 242858887 | 1  |
| MSTRG. 3076. 1  | 1237 | 0. 43458 | 6. 261901855 | 1  |
| MSTRG. 3085. 2  | 3912 | 0. 41878 | 5. 864685059 | 1  |
| MSTRG. 3087. 2  | 68   | 0. 41415 | 11. 53900146 | 1  |
| MSTRG. 3087. 1  | 96   | 0. 4187  | 10. 38580322 | 1  |
| MSTRG. 3093. 1  | 37   | 0. 31465 | 4. 625061035 | 1  |
| MSTRG. 3092. 4  | 694  | 0. 451   | 5. 832580566 | 1  |
| MSTRG. 3092. 5  | 220  | 0. 31205 | 12. 0022583  | 1  |
| MSTRG. 3088. 2  | 524  | 0. 44386 | 6. 284729004 | 1  |
| MSTRG. 3088. 3  | 524  | 0. 4676  | 6. 284729004 | 1  |
| MSTRG. 3113. 1  | 113  | 0. 28311 | 9. 725769043 | 1  |
| MSTRG. 3114. 1  | 1586 | 0. 46961 | 5. 254211426 | 1  |
| MSTRG. 3115. 1  | 185  | 0. 2857  | 9. 988586426 | 1  |
| MSTRG. 3116. 1  | 106  | 0. 29615 | 5. 995544434 | 1  |
| MSTRG. 3116. 2  | 106  | 0. 29111 | 5. 995544434 | 1  |
| MSTRG. 3114. 2  | 1585 | 0. 47487 | 5. 254211426 | 1  |
| MSTRG. 3114. 4  | 1567 | 0. 47487 | 5. 23614502  | 1  |
| MSTRG. 3114. 3  | 1578 | 0. 47487 | 5. 282531738 | 1  |
| MSTRG. 3114. 5  | 1566 | 0. 47487 | 5. 23614502  | 1  |
| MSTRG. 3114. 7  | 1585 | 0. 46549 | 5. 254211426 | 1  |
| MSTRG. 3114. 13 | 1616 | 0. 47487 | 5. 417663574 | 1  |
| MSTRG. 3114. 8  | 1577 | 0. 47487 | 5. 282531738 | 1  |
| MSTRG. 3114. 9  | 1078 | 0. 46266 | 5. 471130371 | 1  |
| MSTRG. 3117. 1  | 91   | 0. 31188 | 7. 700378418 | 1  |
| MSTRG. 3118. 1  | 88   | 0. 2921  | 9. 057678223 | 1  |
| MSTRG. 3114. 14 | 1596 | 0. 47187 | 5. 301574707 | 1  |
| MSTRG. 3114. 15 | 1537 | 0. 46185 | 5. 174987793 | 1  |
| MSTRG. 3122. 1  | 23   | 0. 39649 | 7. 728210449 | 1  |
| MSTRG. 3124. 3  | 555  | 0. 38695 | 9. 679016113 | 1  |
| MSTRG. 3124. 4  | 517  | 0. 40675 | 9. 761535645 | 1  |
| MSTRG. 3124. 5  | 517  | 0. 37955 | 9. 761535645 | 1  |
| MSTRG. 3124. 8  | 214  | 0. 35581 | 9. 788757324 | 1  |
| MSTRG. 3100. 1  | 193  | 0. 32944 | 11. 10748291 | -1 |
| MSTRG. 3101. 1  | 1058 | 0. 42931 | 5. 243347168 | 1  |
| MSTRG. 3101. 3  | 1053 | 0. 42931 | 5. 262756348 | 1  |
| MSTRG. 3101. 2  | 1052 | 0. 39187 | 5. 262756348 | 1  |
| MSTRG. 3101. 4  | 1052 | 0. 42931 | 5. 262756348 | 1  |
| MSTRG. 3101. 5  | 212  | 0. 4413  | 9. 073059082 | 1  |
| MSTRG. 3104. 1  | 79   | 0. 28126 | 12. 25701904 | 1  |
| MSTRG. 3101. 6  | 460  | 0. 46073 | 5. 601501465 | 1  |
| MSTRG. 3096. 2  | 177  | 0. 36739 | 6. 321960449 | 1  |
| MSTRG. 3106. 3  | 1180 | 0. 44852 | 6. 500671387 | 1  |
| MSTRG. 3106. 4  | 1202 | 0. 44573 | 6. 606872559 | 1  |
| MSTRG. 3106. 5  | 1141 | 0. 44573 | 6. 779968262 | 1  |
| MSTRG. 3106. 6  | 1080 | 0. 46982 | 7. 573913574 | -1 |
| MSTRG. 3106. 7  | 533  | 0. 47387 | 8. 991760254 | -1 |
| MSTRG. 3106. 8  | 53   | 0. 29111 | 12. 00177002 | 1  |
| MSTRG. 3109. 1  | 151  | 0. 3493  | 8. 664123535 | 1  |
| MSTRG. 3111. 1  | 92   | 0. 3546  | 9. 812805176 | 1  |
| MSTRG. 3125. 3  | 176  | 0. 33099 | 4. 974914551 | 1  |
| MSTRG. 3126. 2  | 99   | 0. 36205 | 10. 57086182 | 1  |
| MSTRG. 3127. 3  | 284  | 0. 46806 | 5. 381896973 | 1  |
| MSTRG. 3127. 4  | 260  | 0. 46329 | 6. 453796387 | 1  |
| MSTRG. 3130. 1  | 265  | 0. 41387 | 6. 601013184 | 1  |

|                 |      |          |              |    |
|-----------------|------|----------|--------------|----|
| MSTRG. 3130. 2  | 336  | 0. 35407 | 6. 184265137 | 1  |
| MSTRG. 3130. 3  | 336  | 0. 38891 | 6. 184265137 | 1  |
| MSTRG. 3132. 1  | 239  | 0. 4265  | 7. 670715332 | 1  |
| MSTRG. 3132. 3  | 192  | 0. 40755 | 5. 254699707 | 1  |
| MSTRG. 3133. 1  | 1015 | 0. 46295 | 8. 723449707 | 1  |
| MSTRG. 3133. 3  | 992  | 0. 45233 | 7. 359436035 | 1  |
| MSTRG. 3133. 4  | 992  | 0. 46196 | 7. 359436035 | 1  |
| MSTRG. 3133. 5  | 993  | 0. 46196 | 7. 121398926 | 1  |
| MSTRG. 3134. 1  | 118  | 0. 33    | 9. 762390137 | 1  |
| MSTRG. 3144. 2  | 5099 | 0. 46783 | 5. 722961426 | 1  |
| MSTRG. 3136. 1  | 113  | 0. 33716 | 8. 935119629 | 1  |
| MSTRG. 3137. 1  | 48   | 0. 4064  | 10. 60577393 | 1  |
| MSTRG. 3135. 1  | 97   | 0. 41464 | 11. 8012085  | 1  |
| MSTRG. 3135. 2  | 70   | 0. 36452 | 7. 824768066 | 1  |
| MSTRG. 3141. 1  | 129  | 0. 44018 | 11. 53875732 | 1  |
| MSTRG. 3146. 1  | 87   | 0. 38674 | 4. 49407959  | 1  |
| MSTRG. 3146. 2  | 82   | 0. 40089 | 9. 789489746 | 1  |
| MSTRG. 3153. 1  | 69   | 0. 3254  | 5. 160461426 | 1  |
| MSTRG. 3154. 1  | 1237 | 0. 45326 | 5. 356262207 | 1  |
| MSTRG. 3154. 4  | 1237 | 0. 45326 | 5. 356262207 | 1  |
| MSTRG. 3154. 5  | 456  | 0. 43361 | 9. 173522949 | 1  |
| MSTRG. 3155. 1  | 127  | 0. 2825  | 9. 721252441 | -1 |
| MSTRG. 3151. 1  | 4    | 0. 39489 | 5. 274963379 | 1  |
| MSTRG. 3152. 1  | 75   | 0. 36724 | 4. 765686035 | 1  |
| MSTRG. 3157. 2  | 223  | 0. 40095 | 7. 876403809 | 1  |
| MSTRG. 3157. 3  | 223  | 0. 41084 | 7. 876403809 | 1  |
| MSTRG. 3157. 5  | 264  | 0. 40496 | 8. 301574707 | 1  |
| MSTRG. 3163. 1  | 197  | 0. 34913 | 8. 653869629 | 1  |
| MSTRG. 3166. 3  | 100  | 0. 27878 | 9. 850158691 | 1  |
| MSTRG. 3166. 6  | 86   | 0. 32727 | 8. 770568848 | -1 |
| MSTRG. 3166. 7  | 86   | 0. 42637 | 8. 770568848 | -1 |
| MSTRG. 3159. 4  | 585  | 0. 33427 | 9. 364318848 | 1  |
| MSTRG. 3179. 7  | 209  | 0. 28719 | 9. 299499512 | 1  |
| MSTRG. 3179. 9  | 121  | 0. 38897 | 10. 26641846 | 1  |
| MSTRG. 3179. 10 | 168  | 0. 33481 | 6. 769958496 | 1  |
| MSTRG. 3179. 11 | 111  | 0. 32502 | 8. 691833496 | 1  |
| MSTRG. 3183. 1  | 369  | 0. 34779 | 7. 074890137 | 1  |
| MSTRG. 3173. 1  | 170  | 0. 32194 | 9. 320983887 | 1  |
| MSTRG. 3176. 1  | 137  | 0. 28883 | 9. 142028809 | 1  |
| MSTRG. 3177. 1  | 43   | 0. 39989 | 8. 635070801 | 1  |
| MSTRG. 3178. 3  | 62   | 0. 28527 | 9. 100280762 | 1  |
| MSTRG. 3185. 1  | 528  | 0. 33957 | 8. 782043457 | 1  |
| MSTRG. 3185. 2  | 528  | 0. 31974 | 8. 782043457 | 1  |
| MSTRG. 3186. 1  | 280  | 0. 31204 | 9. 868225098 | 1  |
| MSTRG. 3185. 3  | 151  | 0. 28374 | 4. 839782715 | 1  |
| MSTRG. 3186. 6  | 165  | 0. 28807 | 5. 068664551 | 1  |
| MSTRG. 3186. 4  | 472  | 0. 34309 | 6. 253845215 | 1  |
| MSTRG. 3186. 9  | 472  | 0. 34309 | 6. 253845215 | 1  |
| MSTRG. 3186. 10 | 570  | 0. 43015 | 4. 724914551 | 1  |
| MSTRG. 3186. 11 | 325  | 0. 46279 | 5. 539733887 | 1  |
| MSTRG. 3186. 12 | 371  | 0. 3458  | 5. 905456543 | 1  |
| MSTRG. 3187. 1  | 107  | 0. 32464 | 9. 55657959  | 1  |
| MSTRG. 3188. 1  | 154  | 0. 28301 | 10. 56500244 | 1  |
| MSTRG. 3189. 1  | 227  | 0. 33212 | 11. 5569458  | 1  |

|                |     |          |              |    |
|----------------|-----|----------|--------------|----|
| MSTRG. 3190. 2 | 105 | 0. 31772 | 8. 65057373  | 1  |
| MSTRG. 3190. 3 | 105 | 0. 31772 | 8. 65057373  | 1  |
| MSTRG. 3197. 1 | 181 | 0. 40229 | 5. 30267334  | 1  |
| MSTRG. 3198. 1 | 71  | 0. 35386 | 11. 71722412 | 1  |
| MSTRG. 3214. 1 | 60  | 0. 31601 | 9. 698059082 | 1  |
| MSTRG. 3221. 1 | 107 | 0. 35408 | 5. 071472168 | 1  |
| MSTRG. 3226. 1 | 104 | 0. 3974  | 10. 29095459 | 1  |
| MSTRG. 3228. 2 | 609 | 0. 37855 | 5. 191955566 | 1  |
| MSTRG. 3215. 1 | 193 | 0. 40485 | 9. 708557129 | 1  |
| MSTRG. 3217. 1 | 59  | 0. 41485 | 8. 931213379 | 1  |
| MSTRG. 3218. 1 | 136 | 0. 33126 | 11. 2522583  | 1  |
| MSTRG. 3220. 1 | 42  | 0. 37725 | 6. 468566895 | -1 |
| MSTRG. 3234. 2 | 248 | 0. 44766 | 7. 726623535 | 1  |
| MSTRG. 3248. 1 | 84  | 0. 29268 | 6. 369934082 | 1  |
| MSTRG. 3249. 1 | 96  | 0. 29206 | 8. 332336426 | 1  |
| MSTRG. 3243. 1 | 43  | 0. 35005 | 9. 647033691 | -1 |
| MSTRG. 3244. 1 | 45  | 0. 43236 | 8. 636047363 | 1  |
| MSTRG. 3245. 1 | 29  | 0. 44466 | 10. 29498291 | 1  |
| MSTRG. 3252. 1 | 93  | 0. 28467 | 9. 09942627  | 1  |
| MSTRG. 3252. 3 | 93  | 0. 28467 | 9. 09942627  | 1  |
| MSTRG. 3252. 4 | 93  | 0. 29291 | 9. 09942627  | 1  |
| MSTRG. 3252. 5 | 93  | 0. 32161 | 9. 09942627  | 1  |
| MSTRG. 3254. 1 | 85  | 0. 48009 | 10. 42144775 | 1  |
| MSTRG. 3259. 3 | 505 | 0. 43885 | 5. 882019043 | 1  |
| MSTRG. 3259. 4 | 410 | 0. 38849 | 7. 594543457 | 1  |
| MSTRG. 3261. 1 | 189 | 0. 44232 | 9. 114685059 | 1  |
| MSTRG. 3263. 1 | 193 | 0. 28648 | 9. 063903809 | 1  |
| MSTRG. 3264. 1 | 35  | 0. 35168 | 6. 70526123  | 1  |
| MSTRG. 3267. 2 | 578 | 0. 46094 | 4. 973327637 | 1  |
| MSTRG. 3267. 4 | 564 | 0. 46118 | 5. 054138184 | 1  |
| MSTRG. 3269. 1 | 186 | 0. 3391  | 10. 01849365 | 1  |
| MSTRG. 3270. 2 | 656 | 0. 37021 | 8. 04876709  | 1  |
| MSTRG. 3270. 3 | 325 | 0. 28267 | 6. 270690918 | 1  |
| MSTRG. 3271. 1 | 191 | 0. 30816 | 7. 004821777 | 1  |
| MSTRG. 3279. 1 | 69  | 0. 32429 | 6. 408752441 | 1  |
| MSTRG. 3282. 2 | 150 | 0. 33487 | 9. 139221191 | 1  |
| MSTRG. 3282. 3 | 116 | 0. 33487 | 8. 807434082 | 1  |
| MSTRG. 3282. 4 | 135 | 0. 30958 | 9. 789611816 | 1  |
| MSTRG. 3282. 6 | 180 | 0. 31382 | 9. 167541504 | 1  |
| MSTRG. 3282. 5 | 132 | 0. 36426 | 9. 509338379 | 1  |
| MSTRG. 3282. 7 | 173 | 0. 36978 | 9. 803039551 | 1  |
| MSTRG. 3294. 1 | 66  | 0. 39938 | 7. 84552002  | -1 |
| MSTRG. 3294. 2 | 15  | 0. 39744 | 9. 992614746 | -1 |
| MSTRG. 3296. 4 | 167 | 0. 39649 | 6. 906555176 | 1  |
| MSTRG. 3296. 3 | 167 | 0. 3489  | 6. 906555176 | 1  |
| MSTRG. 3297. 5 | 318 | 0. 43722 | 9. 072814941 | 1  |
| MSTRG. 3300. 1 | 373 | 0. 3143  | 9. 08380127  | 1  |
| MSTRG. 3300. 2 | 182 | 0. 33219 | 10. 59527588 | 1  |
| MSTRG. 3287. 1 | 34  | 0. 38776 | 9. 772888184 | -1 |
| MSTRG. 3307. 1 | 521 | 0. 416   | 9. 267150879 | 1  |
| MSTRG. 3307. 4 | 353 | 0. 37334 | 9. 355041504 | 1  |
| MSTRG. 3307. 2 | 521 | 0. 34722 | 9. 267150879 | 1  |
| MSTRG. 3307. 3 | 522 | 0. 42552 | 9. 267150879 | 1  |
| MSTRG. 3307. 6 | 427 | 0. 40764 | 9. 414367676 | 1  |

|                |      |          |              |    |
|----------------|------|----------|--------------|----|
| MSTRG. 3312. 1 | 591  | 0. 32386 | 5. 428649902 | 1  |
| MSTRG. 3314. 1 | 104  | 0. 28165 | 9. 402648926 | 1  |
| MSTRG. 3317. 2 | 552  | 0. 44592 | 5. 614807129 | 1  |
| MSTRG. 3317. 3 | 433  | 0. 44284 | 5. 75567627  | 1  |
| MSTRG. 3317. 4 | 517  | 0. 42611 | 5. 337341309 | 1  |
| MSTRG. 3317. 5 | 882  | 0. 45739 | 5. 770935059 | 1  |
| MSTRG. 3317. 6 | 654  | 0. 45278 | 6. 100891113 | 1  |
| MSTRG. 3320. 1 | 169  | 0. 30706 | 10. 30743408 | 1  |
| MSTRG. 3321. 4 | 199  | 0. 4104  | 8. 397155762 | 1  |
| MSTRG. 3321. 3 | 241  | 0. 42884 | 9. 15045166  | 1  |
| MSTRG. 3321. 6 | 199  | 0. 39155 | 8. 397155762 | 1  |
| MSTRG. 3333. 1 | 92   | 0. 29528 | 9. 815979004 | 1  |
| MSTRG. 3339. 3 | 410  | 0. 35349 | 6. 212219238 | 1  |
| MSTRG. 3339. 4 | 540  | 0. 43064 | 5. 602478027 | 1  |
| MSTRG. 3340. 1 | 115  | 0. 28014 | 9. 230163574 | 1  |
| MSTRG. 3342. 2 | 106  | 0. 38987 | 4. 311462402 | 1  |
| MSTRG. 3342. 1 | 106  | 0. 37854 | 4. 311462402 | 1  |
| MSTRG. 3343. 1 | 61   | 0. 36345 | 7. 728088379 | 1  |
| MSTRG. 3343. 2 | 103  | 0. 33434 | 7. 887512207 | 1  |
| MSTRG. 3346. 1 | 35   | 0. 38828 | 9. 398742676 | 1  |
| MSTRG. 3354. 3 | 91   | 0. 41185 | 6. 723327637 | -1 |
| MSTRG. 3357. 1 | 1510 | 0. 46229 | 5. 484436035 | 1  |
| MSTRG. 3357. 2 | 1550 | 0. 46229 | 5. 516662598 | 1  |
| MSTRG. 3358. 1 | 88   | 0. 30961 | 6. 90032959  | 1  |
| MSTRG. 3357. 4 | 1108 | 0. 47533 | 5. 372619629 | 1  |
| MSTRG. 3359. 6 | 81   | 0. 42066 | 5. 192443848 | 1  |
| MSTRG. 3364. 1 | 216  | 0. 45376 | 9. 465148926 | 1  |
| MSTRG. 3364. 3 | 216  | 0. 44348 | 9. 465148926 | 1  |
| MSTRG. 3364. 4 | 207  | 0. 35976 | 4. 528137207 | 1  |
| MSTRG. 3364. 5 | 207  | 0. 39495 | 4. 528137207 | 1  |
| MSTRG. 3364. 6 | 207  | 0. 39495 | 4. 528137207 | 1  |
| MSTRG. 3364. 7 | 88   | 0. 30988 | 9. 521057129 | 1  |
| MSTRG. 3371. 1 | 408  | 0. 46384 | 9. 183532715 | 1  |
| MSTRG. 3373. 2 | 1062 | 0. 49657 | 9. 572937012 | 1  |
| MSTRG. 3374. 3 | 139  | 0. 2667  | 6. 221740723 | 1  |
| MSTRG. 3375. 1 | 110  | 0. 43856 | 11. 37542725 | 1  |
| MSTRG. 3381. 2 | 69   | 0. 4726  | 9. 65045166  | 1  |
| MSTRG. 3384. 1 | 662  | 0. 47316 | 6. 097839355 | 1  |
| MSTRG. 3389. 3 | 225  | 0. 35673 | 4. 544006348 | 1  |
| MSTRG. 3389. 2 | 459  | 0. 432   | 5. 054870605 | 1  |
| MSTRG. 3389. 4 | 423  | 0. 41397 | 4. 81842041  | 1  |
| MSTRG. 3390. 2 | 181  | 0. 39949 | 9. 20501709  | 1  |
| MSTRG. 3415. 2 | 221  | 0. 44666 | 4. 445007324 | 1  |
| MSTRG. 3415. 3 | 330  | 0. 40935 | 4. 961853027 | 1  |
| MSTRG. 3418. 1 | 397  | 0. 44384 | 9. 308654785 | 1  |
| MSTRG. 3420. 6 | 2965 | 0. 44056 | 9. 422790527 | 1  |
| MSTRG. 3420. 7 | 2766 | 0. 41493 | 9. 466491699 | 1  |
| MSTRG. 3420. 8 | 2721 | 0. 41245 | 9. 42767334  | 1  |
| MSTRG. 3421. 1 | 79   | 0. 32215 | 7. 727966309 | 1  |
| MSTRG. 3424. 1 | 414  | 0. 42954 | 4. 95880127  | -1 |
| MSTRG. 3400. 2 | 499  | 0. 33097 | 9. 655700684 | 1  |
| MSTRG. 3400. 6 | 272  | 0. 35569 | 6. 566711426 | 1  |
| MSTRG. 3400. 3 | 499  | 0. 33511 | 9. 655700684 | 1  |
| MSTRG. 3400. 4 | 347  | 0. 38544 | 6. 894836426 | 1  |



|                 |      |          |              |   |
|-----------------|------|----------|--------------|---|
| MSTRG. 3401. 2  | 50   | 0. 30877 | 9. 299377441 | 1 |
| MSTRG. 3402. 2  | 327  | 0. 46349 | 7. 692199707 | 1 |
| MSTRG. 3427. 2  | 494  | 0. 45887 | 8. 95904541  | 1 |
| MSTRG. 3429. 1  | 538  | 0. 42774 | 5. 43548584  | 1 |
| MSTRG. 3434. 8  | 478  | 0. 35499 | 6. 577575684 | 1 |
| MSTRG. 3435. 1  | 825  | 0. 42388 | 5. 121032715 | 1 |
| MSTRG. 3435. 3  | 787  | 0. 42084 | 5. 069885254 | 1 |
| MSTRG. 3438. 1  | 191  | 0. 34976 | 11. 39141846 | 1 |
| MSTRG. 3444. 1  | 1149 | 0. 29664 | 8. 925231934 | 1 |
| MSTRG. 3444. 3  | 1125 | 0. 29664 | 8. 927429199 | 1 |
| MSTRG. 3444. 5  | 1149 | 0. 37871 | 8. 925231934 | 1 |
| MSTRG. 3444. 7  | 1149 | 0. 35845 | 8. 925231934 | 1 |
| MSTRG. 3444. 12 | 1149 | 0. 33075 | 8. 925231934 | 1 |
| MSTRG. 3444. 13 | 1038 | 0. 35821 | 8. 992980957 | 1 |
| MSTRG. 3441. 3  | 351  | 0. 46283 | 8. 07623291  | 1 |
| MSTRG. 3441. 4  | 370  | 0. 44119 | 8. 859558105 | 1 |
| MSTRG. 3446. 1  | 63   | 0. 34272 | 11. 11114502 | 1 |
| MSTRG. 3470. 3  | 261  | 0. 40709 | 4. 60345459  | 1 |
| MSTRG. 3471. 3  | 1085 | 0. 47046 | 6. 070007324 | 1 |
| MSTRG. 3471. 1  | 1085 | 0. 47706 | 6. 070007324 | 1 |
| MSTRG. 3471. 5  | 1085 | 0. 47477 | 6. 070007324 | 1 |
| MSTRG. 3471. 4  | 1087 | 0. 4594  | 6. 609924316 | 1 |
| MSTRG. 3471. 10 | 1104 | 0. 42558 | 6. 522277832 | 1 |
| MSTRG. 3471. 11 | 1104 | 0. 4532  | 6. 522277832 | 1 |
| MSTRG. 3471. 12 | 1087 | 0. 43238 | 6. 609924316 | 1 |
| MSTRG. 3471. 13 | 1087 | 0. 47654 | 6. 609924316 | 1 |
| MSTRG. 3471. 14 | 1040 | 0. 47548 | 6. 276428223 | 1 |
| MSTRG. 3471. 16 | 99   | 0. 32266 | 4. 811828613 | 1 |
| MSTRG. 3472. 3  | 98   | 0. 27911 | 4. 959533691 | 1 |
| MSTRG. 3474. 1  | 91   | 0. 37078 | 10. 21832275 | 1 |
| MSTRG. 3475. 1  | 248  | 0. 33716 | 4. 748840332 | 1 |
| MSTRG. 3475. 3  | 248  | 0. 43664 | 4. 748840332 | 1 |
| MSTRG. 3477. 1  | 36   | 0. 46018 | 10. 46124268 | 1 |
| MSTRG. 3477. 2  | 35   | 0. 4121  | 10. 85992432 | 1 |
| MSTRG. 3478. 5  | 1879 | 0. 42031 | 6. 756286621 | 1 |
| MSTRG. 3478. 7  | 1589 | 0. 45078 | 6. 34173584  | 1 |
| MSTRG. 3482. 1  | 203  | 0. 39934 | 9. 342590332 | 1 |
| MSTRG. 3447. 2  | 51   | 0. 33115 | 9. 93951416  | 1 |
| MSTRG. 3454. 1  | 85   | 0. 44566 | 6. 897766113 | 1 |
| MSTRG. 3463. 2  | 97   | 0. 44744 | 4. 680480957 | 1 |
| MSTRG. 3469. 2  | 95   | 0. 38637 | 8. 514465332 | 1 |
| MSTRG. 3493. 2  | 82   | 0. 3681  | 7. 687927246 | 1 |
| MSTRG. 3497. 1  | 36   | 0. 40186 | 11. 39801025 | 1 |
| MSTRG. 3498. 2  | 560  | 0. 39114 | 4. 944030762 | 1 |
| MSTRG. 3504. 1  | 112  | 0. 31398 | 9. 896057129 | 1 |
| MSTRG. 3509. 1  | 46   | 0. 37426 | 10. 21466064 | 1 |
| MSTRG. 3521. 1  | 822  | 0. 39353 | 6. 126281738 | 1 |
| MSTRG. 3521. 2  | 822  | 0. 45953 | 6. 126281738 | 1 |
| MSTRG. 3521. 3  | 837  | 0. 45953 | 5. 960510254 | 1 |
| MSTRG. 3521. 4  | 801  | 0. 46261 | 6. 011413574 | 1 |
| MSTRG. 3521. 5  | 837  | 0. 45953 | 5. 960510254 | 1 |
| MSTRG. 3521. 6  | 801  | 0. 46261 | 6. 011413574 | 1 |
| MSTRG. 3521. 7  | 837  | 0. 45953 | 5. 960510254 | 1 |
| MSTRG. 3521. 11 | 813  | 0. 44272 | 5. 898010254 | 1 |

|                |      |          |              |    |
|----------------|------|----------|--------------|----|
| MSTRG. 3530. 4 | 187  | 0. 43433 | 10. 69085693 | 1  |
| MSTRG. 3536. 2 | 90   | 0. 40456 | 4. 422790527 | 1  |
| MSTRG. 3536. 3 | 90   | 0. 3388  | 4. 422790527 | 1  |
| MSTRG. 3536. 4 | 90   | 0. 43656 | 4. 422790527 | 1  |
| MSTRG. 3536. 5 | 90   | 0. 44832 | 4. 422790527 | 1  |
| MSTRG. 3536. 6 | 90   | 0. 36411 | 4. 422790527 | 1  |
| MSTRG. 3543. 3 | 453  | 0. 40771 | 5. 176208496 | 1  |
| MSTRG. 3544. 1 | 469  | 0. 42268 | 4. 843322754 | 1  |
| MSTRG. 3544. 2 | 469  | 0. 43157 | 4. 843322754 | 1  |
| MSTRG. 3544. 4 | 469  | 0. 44492 | 4. 843322754 | 1  |
| MSTRG. 3544. 3 | 303  | 0. 35568 | 4. 952453613 | 1  |
| MSTRG. 3544. 7 | 294  | 0. 37258 | 5. 015319824 | 1  |
| MSTRG. 3546. 1 | 380  | 0. 41368 | 9. 049743652 | 1  |
| MSTRG. 3547. 5 | 1254 | 0. 45692 | 6. 092102051 | 1  |
| MSTRG. 3547. 4 | 1254 | 0. 45692 | 6. 092102051 | 1  |
| MSTRG. 3547. 6 | 190  | 0. 32174 | 10. 09710693 | -1 |
| MSTRG. 3542. 4 | 742  | 0. 31764 | 6. 345397949 | 1  |
| MSTRG. 3550. 3 | 156  | 0. 34122 | 6. 919128418 | 1  |
| MSTRG. 3548. 1 | 102  | 0. 32255 | 6. 249572754 | 1  |
| MSTRG. 3557. 2 | 1367 | 0. 37984 | 6. 432800293 | 1  |
| MSTRG. 3557. 3 | 1393 | 0. 37709 | 6. 855651855 | 1  |
| MSTRG. 3558. 1 | 89   | 0. 31909 | 6. 023010254 | 1  |
| MSTRG. 3559. 1 | 198  | 0. 29583 | 9. 452453613 | 1  |
| MSTRG. 3561. 4 | 419  | 0. 50187 | 9. 867248535 | 1  |
| MSTRG. 3561. 5 | 530  | 0. 46924 | 9. 574279785 | 1  |
| MSTRG. 3561. 6 | 699  | 0. 47015 | 9. 435974121 | 1  |
| MSTRG. 3561. 7 | 548  | 0. 44693 | 9. 647399902 | 1  |
| MSTRG. 3563. 3 | 297  | 0. 39817 | 9. 166564941 | 1  |
| MSTRG. 3563. 4 | 385  | 0. 36276 | 9. 026184082 | 1  |
| MSTRG. 3565. 1 | 167  | 0. 42473 | 5. 152160645 | 1  |
| MSTRG. 3562. 1 | 263  | 0. 3997  | 3. 806213379 | 1  |
| MSTRG. 3566. 3 | 237  | 0. 47665 | 5. 71307373  | 1  |
| MSTRG. 3566. 2 | 237  | 0. 47422 | 5. 71307373  | 1  |
| MSTRG. 3570. 2 | 751  | 0. 33208 | 7. 302062988 | 1  |
| MSTRG. 3580. 1 | 126  | 0. 3455  | 10. 39373779 | 1  |
| MSTRG. 3580. 2 | 147  | 0. 3891  | 10. 55804443 | 1  |
| MSTRG. 3588. 6 | 355  | 0. 481   | 8. 874328613 | 1  |
| MSTRG. 3588. 7 | 359  | 0. 42327 | 9. 60357666  | 1  |
| MSTRG. 3592. 6 | 224  | 0. 43642 | 5. 179992676 | 1  |
| MSTRG. 3593. 3 | 106  | 0. 33872 | 9. 505187988 | 1  |
| MSTRG. 3598. 1 | 156  | 0. 35524 | 10. 01483154 | 1  |
| MSTRG. 3602. 1 | 137  | 0. 37248 | 11. 15606689 | 1  |
| MSTRG. 3604. 2 | 474  | 0. 35259 | 6. 419494629 | 1  |
| MSTRG. 3604. 3 | 475  | 0. 35259 | 6. 273498535 | 1  |
| MSTRG. 3604. 4 | 268  | 0. 3355  | 5. 921203613 | 1  |
| MSTRG. 3604. 5 | 174  | 0. 37665 | 5. 500305176 | 1  |
| MSTRG. 3604. 6 | 174  | 0. 33874 | 5. 500305176 | 1  |
| MSTRG. 3606. 2 | 126  | 0. 31823 | 9. 725646973 | 1  |
| MSTRG. 3606. 3 | 244  | 0. 31747 | 9. 957336426 | 1  |
| MSTRG. 3612. 3 | 68   | 0. 30239 | 9. 651672363 | 1  |
| MSTRG. 3612. 2 | 157  | 0. 29227 | 6. 06842041  | 1  |
| MSTRG. 3612. 4 | 148  | 0. 33579 | 6. 721374512 | 1  |
| MSTRG. 3614. 1 | 79   | 0. 34477 | 9. 663513184 | 1  |
| MSTRG. 3623. 1 | 449  | 0. 33863 | 9. 36151123  | 1  |

|                 |      |          |              |    |
|-----------------|------|----------|--------------|----|
| MSTRG. 3623. 2  | 466  | 0. 43629 | 9. 113464355 | 1  |
| MSTRG. 3623. 7  | 243  | 0. 34128 | 9. 693664551 | 1  |
| MSTRG. 3631. 1  | 38   | 0. 39808 | 9. 304138184 | -1 |
| MSTRG. 3633. 4  | 172  | 0. 29257 | 9. 706237793 | 1  |
| MSTRG. 3642. 2  | 632  | 0. 43704 | 4. 557556152 | 1  |
| MSTRG. 3642. 3  | 559  | 0. 42324 | 4. 660949707 | 1  |
| MSTRG. 3650. 1  | 133  | 0. 40939 | 10. 22979736 | 1  |
| MSTRG. 3651. 1  | 157  | 0. 36466 | 8. 863586426 | 1  |
| MSTRG. 3652. 1  | 725  | 0. 38384 | 7. 863952637 | 1  |
| MSTRG. 3654. 1  | 63   | 0. 35574 | 8. 969421387 | 1  |
| MSTRG. 3658. 1  | 29   | 0. 36477 | 5. 380187988 | 1  |
| MSTRG. 3659. 2  | 266  | 0. 45017 | 9. 257873535 | 1  |
| MSTRG. 3663. 1  | 113  | 0. 34233 | 8. 211486816 | 1  |
| MSTRG. 3664. 1  | 42   | 0. 43804 | 8. 293762207 | -1 |
| MSTRG. 3675. 1  | 317  | 0. 33851 | 8. 754821777 | 1  |
| MSTRG. 3675. 2  | 641  | 0. 38914 | 8. 095397949 | 1  |
| MSTRG. 3675. 3  | 641  | 0. 35655 | 8. 095397949 | 1  |
| MSTRG. 3675. 4  | 418  | 0. 3644  | 7. 276794434 | 1  |
| MSTRG. 3675. 5  | 185  | 0. 34098 | 5. 721618652 | 1  |
| MSTRG. 3675. 6  | 494  | 0. 38828 | 7. 062438965 | 1  |
| MSTRG. 3675. 7  | 458  | 0. 39142 | 7. 699401855 | 1  |
| MSTRG. 3675. 8  | 455  | 0. 34103 | 6. 839172363 | 1  |
| MSTRG. 3675. 9  | 641  | 0. 35395 | 8. 095397949 | 1  |
| MSTRG. 3675. 10 | 641  | 0. 38223 | 8. 095397949 | 1  |
| MSTRG. 3675. 11 | 451  | 0. 29343 | 7. 73236084  | 1  |
| MSTRG. 3676. 1  | 135  | 0. 31861 | 6. 931335449 | 1  |
| MSTRG. 3674. 1  | 40   | 0. 42652 | 5. 425354004 | 1  |
| MSTRG. 3679. 1  | 600  | 0. 46001 | 8. 400085449 | 1  |
| MSTRG. 3679. 2  | 625  | 0. 44721 | 8. 25982666  | 1  |
| MSTRG. 3679. 3  | 408  | 0. 40187 | 8. 318786621 | 1  |
| MSTRG. 3685. 1  | 1194 | 0. 42764 | 5. 653991699 | 1  |
| MSTRG. 3685. 2  | 1194 | 0. 40969 | 5. 653991699 | 1  |
| MSTRG. 3687. 2  | 245  | 0. 356   | 5. 745178223 | 1  |
| MSTRG. 3694. 1  | 111  | 0. 46049 | 9. 655212402 | 1  |
| MSTRG. 3702. 2  | 579  | 0. 38919 | 8. 618347168 | 1  |
| MSTRG. 3702. 3  | 672  | 0. 41515 | 8. 367858887 | 1  |
| MSTRG. 3704. 1  | 84   | 0. 26684 | 9. 257385254 | 1  |
| MSTRG. 3707. 2  | 935  | 0. 41169 | 8. 651550293 | 1  |
| MSTRG. 3707. 3  | 4    | 0. 30439 | 4. 032043457 | 1  |
| MSTRG. 3708. 2  | 62   | 0. 30015 | 9. 097961426 | 1  |
| MSTRG. 3710. 1  | 717  | 0. 37001 | 7. 564147949 | 1  |
| MSTRG. 3712. 1  | 64   | 0. 26409 | 10. 94000244 | 1  |
| MSTRG. 3710. 4  | 734  | 0. 36749 | 7. 561706543 | 1  |
| MSTRG. 3710. 5  | 305  | 0. 32697 | 5. 15814209  | 1  |
| MSTRG. 3716. 2  | 1121 | 0. 3488  | 8. 329406738 | 1  |
| MSTRG. 3716. 3  | 670  | 0. 34715 | 7. 565979004 | 1  |
| MSTRG. 3716. 5  | 1232 | 0. 37751 | 8. 549621582 | 1  |
| MSTRG. 3716. 6  | 1209 | 0. 37999 | 8. 484924316 | 1  |
| MSTRG. 3716. 7  | 670  | 0. 34467 | 7. 565979004 | 1  |
| MSTRG. 3716. 9  | 670  | 0. 44993 | 7. 565979004 | 1  |
| MSTRG. 3725. 1  | 80   | 0. 28648 | 11. 71466064 | 1  |
| MSTRG. 3733. 3  | 65   | 0. 38677 | 9. 496520996 | 1  |
| MSTRG. 3737. 2  | 501  | 0. 37626 | 8. 241516113 | 1  |
| MSTRG. 3721. 1  | 133  | 0. 31065 | 8. 794494629 | 1  |

|                |      |          |              |    |
|----------------|------|----------|--------------|----|
| MSTRG. 3721. 2 | 133  | 0. 34827 | 9. 117492676 | 1  |
| MSTRG. 3722. 1 | 338  | 0. 43754 | 5. 86907959  | 1  |
| MSTRG. 3748. 4 | 193  | 0. 34009 | 6. 200134277 | 1  |
| MSTRG. 3749. 6 | 993  | 0. 46299 | 9. 147155762 | 1  |
| MSTRG. 3749. 7 | 1046 | 0. 47578 | 9. 109558105 | 1  |
| MSTRG. 3749. 3 | 1036 | 0. 46291 | 9. 109558105 | 1  |
| MSTRG. 3749. 5 | 1003 | 0. 45733 | 9. 147033691 | 1  |
| MSTRG. 3755. 1 | 81   | 0. 32237 | 9. 917297363 | 1  |
| MSTRG. 3764. 2 | 184  | 0. 29059 | 6. 387268066 | 1  |
| MSTRG. 3765. 1 | 101  | 0. 33219 | 9. 694763184 | 1  |
| MSTRG. 3765. 2 | 143  | 0. 30119 | 6. 144470215 | 1  |
| MSTRG. 3767. 1 | 73   | 0. 30046 | 10. 08197021 | 1  |
| MSTRG. 3768. 1 | 52   | 0. 40125 | 8. 906555176 | 1  |
| MSTRG. 3769. 1 | 90   | 0. 38062 | 9. 777770996 | 1  |
| MSTRG. 3770. 1 | 59   | 0. 27574 | 9. 301940918 | 1  |
| MSTRG. 3773. 2 | 205  | 0. 38268 | 9. 551574707 | 1  |
| MSTRG. 3773. 3 | 207  | 0. 34656 | 9. 551574707 | 1  |
| MSTRG. 3773. 4 | 292  | 0. 31641 | 9. 796936035 | 1  |
| MSTRG. 3777. 2 | 58   | 0. 35017 | 7. 793762207 | 1  |
| MSTRG. 3778. 1 | 465  | 0. 45123 | 8. 875549316 | 1  |
| MSTRG. 3756. 2 | 243  | 0. 37474 | 9. 90032959  | 1  |
| MSTRG. 3780. 4 | 797  | 0. 45688 | 9. 721374512 | 1  |
| MSTRG. 3780. 5 | 68   | 0. 37206 | 9. 508850098 | 1  |
| MSTRG. 3784. 1 | 50   | 0. 34851 | 9. 800476074 | 1  |
| MSTRG. 3788. 1 | 56   | 0. 36613 | 6. 494689941 | 1  |
| MSTRG. 3789. 1 | 962  | 0. 35021 | 10. 04766846 | 1  |
| MSTRG. 3789. 3 | 958  | 0. 34367 | 10. 03753662 | 1  |
| MSTRG. 3790. 1 | 74   | 0. 33334 | 9. 182678223 | 1  |
| MSTRG. 3800. 1 | 276  | 0. 46929 | 9. 149597168 | 1  |
| MSTRG. 3802. 2 | 218  | 0. 43836 | 6. 44744873  | 1  |
| MSTRG. 3802. 3 | 218  | 0. 45222 | 6. 44744873  | 1  |
| MSTRG. 3802. 4 | 218  | 0. 43836 | 6. 44744873  | 1  |
| MSTRG. 3802. 5 | 218  | 0. 45532 | 6. 44744873  | 1  |
| MSTRG. 3804. 1 | 826  | 0. 46845 | 6. 103210449 | 1  |
| MSTRG. 3807. 1 | 70   | 0. 37099 | 9. 778625488 | 1  |
| MSTRG. 3813. 1 | 141  | 0. 34165 | 11. 70721436 | 1  |
| MSTRG. 3817. 3 | 1645 | 0. 40257 | 6. 209899902 | 1  |
| MSTRG. 3821. 2 | 1013 | 0. 34958 | 5. 741027832 | 1  |
| MSTRG. 3821. 1 | 1013 | 0. 34019 | 5. 741027832 | 1  |
| MSTRG. 3821. 4 | 1013 | 0. 37491 | 5. 741027832 | 1  |
| MSTRG. 3831. 5 | 542  | 0. 43298 | 5. 402526855 | 1  |
| MSTRG. 3832. 3 | 681  | 0. 47372 | 6. 003356934 | 1  |
| MSTRG. 3832. 4 | 681  | 0. 47372 | 6. 003356934 | 1  |
| MSTRG. 3832. 5 | 681  | 0. 47299 | 6. 003356934 | 1  |
| MSTRG. 3833. 1 | 78   | 0. 39661 | 5. 453918457 | -1 |
| MSTRG. 3834. 1 | 684  | 0. 43996 | 5. 812072754 | 1  |
| MSTRG. 3834. 2 | 666  | 0. 36349 | 5. 707458496 | 1  |
| MSTRG. 3839. 1 | 592  | 0. 48373 | 8. 288269043 | 1  |
| MSTRG. 3825. 2 | 543  | 0. 408   | 10. 53607178 | 1  |
| MSTRG. 3825. 1 | 543  | 0. 408   | 10. 53607178 | 1  |
| MSTRG. 3828. 1 | 382  | 0. 4474  | 5. 09161377  | 1  |
| MSTRG. 3842. 1 | 270  | 0. 2994  | 6. 595153809 | 1  |
| MSTRG. 3842. 2 | 334  | 0. 2994  | 8. 988586426 | 1  |
| MSTRG. 3842. 3 | 601  | 0. 38384 | 8. 714782715 | 1  |

|                |     |          |              |    |
|----------------|-----|----------|--------------|----|
| MSTRG. 3842. 4 | 80  | 0. 33911 | 6. 000549316 | 1  |
| MSTRG. 3842. 6 | 475 | 0. 39465 | 7. 969299316 | 1  |
| MSTRG. 3855. 1 | 85  | 0. 32774 | 9. 053894043 | 1  |
| MSTRG. 3854. 3 | 364 | 0. 34306 | 5. 946960449 | 1  |
| MSTRG. 3856. 1 | 51  | 0. 3432  | 7. 761413574 | 1  |
| MSTRG. 3852. 1 | 375 | 0. 40929 | 5. 280090332 | 1  |
| MSTRG. 3852. 2 | 375 | 0. 45288 | 5. 280090332 | 1  |
| MSTRG. 3868. 1 | 53  | 0. 29928 | 7. 978942871 | -1 |
| MSTRG. 3969. 1 | 205 | 0. 29127 | 9. 513977051 | 1  |
| MSTRG. 3970. 1 | 68  | 0. 3096  | 4. 940734863 | 1  |
| MSTRG. 3971. 1 | 97  | 0. 32545 | 8. 736022949 | 1  |
| MSTRG. 3975. 1 | 79  | 0. 35874 | 9. 625305176 | 1  |
| MSTRG. 3976. 1 | 195 | 0. 43373 | 9. 488220215 | 1  |
| MSTRG. 3977. 1 | 107 | 0. 27433 | 6. 80291748  | 1  |
| MSTRG. 3978. 1 | 200 | 0. 27097 | 8. 848815918 | 1  |
| MSTRG. 3979. 1 | 124 | 0. 34772 | 7. 820495605 | 1  |
| MSTRG. 3980. 1 | 10  | 0. 41194 | 5. 752990723 | 1  |
| MSTRG. 3972. 5 | 81  | 0. 2831  | 9. 301330566 | 1  |
| MSTRG. 3981. 1 | 53  | 0. 35048 | 8. 035949707 | 1  |
| MSTRG. 3982. 1 | 81  | 0. 32465 | 8. 531188965 | 1  |
| MSTRG. 3983. 1 | 57  | 0. 31746 | 9. 897888184 | 1  |
| MSTRG. 3983. 2 | 53  | 0. 34866 | 5. 872009277 | 1  |
| MSTRG. 3984. 1 | 106 | 0. 31059 | 8. 722595215 | 1  |
| MSTRG. 3984. 2 | 53  | 0. 28467 | 11. 52288818 | 1  |
| MSTRG. 3985. 1 | 375 | 0. 28657 | 8. 778259277 | 1  |
| MSTRG. 3985. 2 | 55  | 0. 26449 | 8. 659973145 | 1  |
| MSTRG. 3972. 6 | 116 | 0. 29059 | 8. 42767334  | 1  |
| MSTRG. 3986. 1 | 98  | 0. 33218 | 7. 781677246 | 1  |
| MSTRG. 3987. 1 | 110 | 0. 30411 | 11. 73065186 | 1  |
| MSTRG. 3987. 2 | 86  | 0. 30411 | 12. 01251221 | 1  |
| MSTRG. 3987. 3 | 86  | 0. 30796 | 12. 01251221 | 1  |
| MSTRG. 3987. 4 | 26  | 0. 32928 | 8. 191589355 | 1  |
| MSTRG. 3989. 1 | 161 | 0. 34747 | 4. 819519043 | 1  |
| MSTRG. 3972. 9 | 90  | 0. 36239 | 6. 799865723 | 1  |
| MSTRG. 3991. 1 | 31  | 0. 33932 | 8. 534973145 | 1  |
| MSTRG. 3877. 1 | 75  | 0. 3331  | 9. 743225098 | 1  |
| MSTRG. 3883. 1 | 13  | 0. 40479 | 4. 85333252  | 1  |
| MSTRG. 3889. 2 | 330 | 0. 38674 | 9. 131408691 | 1  |
| MSTRG. 3890. 1 | 739 | 0. 49123 | 5. 281433105 | 1  |
| MSTRG. 3893. 1 | 113 | 0. 35913 | 9. 582580566 | 1  |
| MSTRG. 3895. 3 | 574 | 0. 38964 | 9. 425231934 | 1  |
| MSTRG. 3895. 4 | 355 | 0. 38964 | 9. 876159668 | 1  |
| MSTRG. 3895. 6 | 285 | 0. 40382 | 9. 882629395 | -1 |
| MSTRG. 3895. 7 | 269 | 0. 37739 | 9. 836608887 | -1 |
| MSTRG. 3896. 1 | 55  | 0. 40785 | 8. 636047363 | -1 |
| MSTRG. 3897. 1 | 309 | 0. 44423 | 6. 890075684 | 1  |
| MSTRG. 3900. 2 | 340 | 0. 4198  | 8. 739929199 | 1  |
| MSTRG. 3902. 2 | 694 | 0. 42747 | 8. 213317871 | 1  |
| MSTRG. 3903. 2 | 418 | 0. 39853 | 6. 296936035 | 1  |
| MSTRG. 3903. 3 | 418 | 0. 38466 | 6. 296936035 | 1  |
| MSTRG. 3903. 4 | 418 | 0. 4205  | 6. 296936035 | 1  |
| MSTRG. 3903. 5 | 128 | 0. 2921  | 8. 399353027 | 1  |
| MSTRG. 3910. 2 | 994 | 0. 47293 | 6. 364074707 | 1  |
| MSTRG. 3911. 3 | 600 | 0. 4606  | 8. 026184082 | 1  |

|                 |      |          |              |    |
|-----------------|------|----------|--------------|----|
| MSTRG. 3913. 3  | 360  | 0. 3406  | 9. 471252441 | 1  |
| MSTRG. 3918. 1  | 60   | 0. 37607 | 7. 663513184 | 1  |
| MSTRG. 3935. 6  | 356  | 0. 37649 | 6. 118713379 | 1  |
| MSTRG. 3935. 5  | 361  | 0. 38694 | 6. 118713379 | 1  |
| MSTRG. 3935. 7  | 361  | 0. 38858 | 6. 118713379 | 1  |
| MSTRG. 3935. 8  | 203  | 0. 43435 | 9. 098571777 | 1  |
| MSTRG. 3935. 9  | 302  | 0. 44573 | 6. 906555176 | 1  |
| MSTRG. 3935. 11 | 74   | 0. 28963 | 7. 911315918 | 1  |
| MSTRG. 3936. 1  | 113  | 0. 34392 | 9. 099182129 | -1 |
| MSTRG. 3937. 1  | 77   | 0. 30751 | 9. 980041504 | 1  |
| MSTRG. 3930. 1  | 90   | 0. 35706 | 9. 301330566 | 1  |
| MSTRG. 3934. 1  | 80   | 0. 3277  | 8. 984436035 | 1  |
| MSTRG. 3939. 2  | 156  | 0. 38325 | 5. 859069824 | 1  |
| MSTRG. 3939. 4  | 53   | 0. 33103 | 4. 269470215 | 1  |
| MSTRG. 3940. 3  | 263  | 0. 31255 | 9. 184143066 | 1  |
| MSTRG. 3940. 6  | 84   | 0. 25541 | 9. 64251709  | 1  |
| MSTRG. 3940. 7  | 84   | 0. 31255 | 9. 64251709  | 1  |
| MSTRG. 3941. 1  | 30   | 0. 3827  | 10. 39080811 | -1 |
| MSTRG. 3954. 1  | 84   | 0. 414   | 11. 00006104 | 1  |
| MSTRG. 3959. 2  | 589  | 0. 47534 | 8. 882873535 | 1  |
| MSTRG. 3960. 1  | 102  | 0. 3853  | 6. 874084473 | 1  |
| MSTRG. 3963. 3  | 1224 | 0. 50301 | 6. 171813965 | 1  |
| MSTRG. 3964. 1  | 54   | 0. 32552 | 8. 43536377  | 1  |
| MSTRG. 3963. 6  | 745  | 0. 46923 | 6. 304260254 | 1  |
| MSTRG. 3965. 2  | 239  | 0. 34775 | 6. 588195801 | 1  |
| MSTRG. 3993. 2  | 197  | 0. 32916 | 10. 01751709 | 1  |
| MSTRG. 3995. 1  | 41   | 0. 347   | 8. 978942871 | 1  |
| MSTRG. 3997. 3  | 117  | 0. 28119 | 10. 00262451 | 1  |
| MSTRG. 3997. 2  | 261  | 0. 28842 | 6. 405090332 | 1  |
| MSTRG. 4000. 1  | 183  | 0. 33535 | 10. 48175049 | 1  |
| MSTRG. 4003. 1  | 466  | 0. 40895 | 5. 997131348 | 1  |
| MSTRG. 4003. 3  | 371  | 0. 35663 | 5. 437316895 | 1  |
| MSTRG. 4003. 4  | 459  | 0. 35663 | 5. 954772949 | 1  |
| MSTRG. 4004. 1  | 189  | 0. 31656 | 10. 73638916 | 1  |
| MSTRG. 4006. 1  | 176  | 0. 26498 | 4. 686340332 | 1  |
| MSTRG. 4006. 2  | 176  | 0. 37158 | 4. 686340332 | 1  |
| MSTRG. 4010. 2  | 1353 | 0. 43188 | 5. 498474121 | 1  |
| MSTRG. 4010. 1  | 1456 | 0. 45143 | 5. 483093262 | 1  |
| MSTRG. 4010. 3  | 1353 | 0. 35972 | 5. 498474121 | 1  |
| MSTRG. 4011. 1  | 190  | 0. 25765 | 6. 869445801 | 1  |
| MSTRG. 4010. 6  | 120  | 0. 30469 | 5. 521789551 | 1  |
| MSTRG. 4014. 1  | 63   | 0. 34035 | 4. 555847168 | 1  |
| MSTRG. 4017. 1  | 491  | 0. 39228 | 8. 775939941 | 1  |
| MSTRG. 4017. 3  | 491  | 0. 44806 | 8. 775939941 | 1  |
| MSTRG. 4008. 3  | 751  | 0. 49682 | 5. 638000488 | 1  |
| MSTRG. 4020. 1  | 102  | 0. 28035 | 8. 987731934 | 1  |
| MSTRG. 4023. 2  | 393  | 0. 29852 | 5. 187316895 | 1  |
| MSTRG. 4024. 2  | 121  | 0. 41422 | 9. 097839355 | 1  |
| MSTRG. 4024. 4  | 92   | 0. 4116  | 9. 299133301 | 1  |
| MSTRG. 4024. 5  | 105  | 0. 45795 | 8. 521057129 | -1 |
| MSTRG. 4026. 1  | 935  | 0. 47071 | 9. 250915527 | 1  |
| MSTRG. 4026. 2  | 935  | 0. 47071 | 9. 250915527 | 1  |
| MSTRG. 4026. 3  | 935  | 0. 47755 | 9. 250915527 | 1  |
| MSTRG. 4026. 4  | 935  | 0. 44679 | 9. 250915527 | 1  |

|                |      |          |              |    |
|----------------|------|----------|--------------|----|
| MSTRG. 4026. 5 | 935  | 0. 45944 | 9. 250915527 | 1  |
| MSTRG. 4026. 6 | 935  | 0. 45689 | 9. 250915527 | 1  |
| MSTRG. 4028. 5 | 625  | 0. 3864  | 5. 35723877  | 1  |
| MSTRG. 4028. 6 | 814  | 0. 44579 | 5. 864318848 | 1  |
| MSTRG. 4028. 7 | 788  | 0. 42821 | 5. 87713623  | 1  |
| MSTRG. 4028. 8 | 786  | 0. 36633 | 5. 936950684 | 1  |
| MSTRG. 4028. 9 | 816  | 0. 43193 | 5. 813049316 | 1  |
| MSTRG. 4030. 3 | 576  | 0. 44953 | 8. 926452637 | 1  |
| MSTRG. 4036. 1 | 1495 | 0. 46527 | 6. 70111084  | 1  |
| MSTRG. 4037. 1 | 21   | 0. 38305 | 11. 10540771 | 1  |
| MSTRG. 4047. 3 | 1302 | 0. 46474 | 8. 286804199 | 1  |
| MSTRG. 4047. 4 | 45   | 0. 3132  | 9. 099182129 | 1  |
| MSTRG. 4047. 5 | 1368 | 0. 46474 | 8. 660583496 | 1  |
| MSTRG. 4047. 6 | 73   | 0. 29615 | 7. 733337402 | 1  |
| MSTRG. 4047. 7 | 1289 | 0. 46583 | 8. 223205566 | 1  |
| MSTRG. 4047. 8 | 1271 | 0. 39748 | 8. 403503418 | 1  |
| MSTRG. 4047. 9 | 262  | 0. 34193 | 9. 658630371 | 1  |
| MSTRG. 4038. 1 | 53   | 0. 38356 | 7. 698425293 | 1  |
| MSTRG. 4051. 1 | 90   | 0. 37421 | 5. 110168457 | 1  |
| MSTRG. 4051. 2 | 111  | 0. 30191 | 8. 411804199 | 1  |
| MSTRG. 4052. 4 | 373  | 0. 42551 | 4. 834533691 | 1  |
| MSTRG. 4053. 1 | 138  | 0. 44256 | 6. 030334473 | 1  |
| MSTRG. 4055. 1 | 10   | 0. 39413 | 6. 690124512 | 1  |
| MSTRG. 4058. 1 | 804  | 0. 4458  | 6. 199035645 | 1  |
| MSTRG. 4058. 5 | 767  | 0. 45412 | 6. 480163574 | 1  |
| MSTRG. 4072. 1 | 587  | 0. 46586 | 6. 293518066 | 1  |
| MSTRG. 4072. 3 | 46   | 0. 42002 | 10. 46112061 | 1  |
| MSTRG. 4074. 1 | 112  | 0. 44512 | 5. 060852051 | -1 |
| MSTRG. 4079. 1 | 116  | 0. 36357 | 5. 79083252  | 1  |
| MSTRG. 4080. 1 | 70   | 0. 37847 | 6. 558898926 | -1 |
| MSTRG. 4081. 1 | 236  | 0. 33243 | 5. 18939209  | 1  |
| MSTRG. 4082. 1 | 65   | 0. 40225 | 7. 788269043 | 1  |
| MSTRG. 4083. 1 | 307  | 0. 45318 | 5. 940734863 | 1  |
| MSTRG. 4068. 2 | 765  | 0. 45917 | 6. 684509277 | 1  |
| MSTRG. 4070. 1 | 59   | 0. 42317 | 8. 706848145 | -1 |
| MSTRG. 4092. 3 | 336  | 0. 27937 | 8. 583190918 | 1  |
| MSTRG. 4092. 4 | 262  | 0. 29033 | 10. 44329834 | 1  |
| MSTRG. 4093. 1 | 189  | 0. 28157 | 9. 762390137 | 1  |
| MSTRG. 4093. 2 | 75   | 0. 36111 | 9. 83380127  | 1  |
| MSTRG. 4094. 1 | 73   | 0. 29594 | 5. 760803223 | 1  |
| MSTRG. 4095. 1 | 154  | 0. 33222 | 10. 08575439 | 1  |
| MSTRG. 4096. 1 | 126  | 0. 30229 | 7. 024475098 | 1  |
| MSTRG. 4092. 5 | 129  | 0. 32082 | 5. 76776123  | 1  |
| MSTRG. 4092. 6 | 129  | 0. 33466 | 5. 76776123  | 1  |
| MSTRG. 4092. 7 | 65   | 0. 39549 | 9. 070983887 | 1  |
| MSTRG. 4092. 8 | 108  | 0. 37226 | 9. 871887207 | 1  |
| MSTRG. 4099. 1 | 131  | 0. 3439  | 4. 717224121 | 1  |
| MSTRG. 4104. 1 | 75   | 0. 37127 | 10. 25469971 | 1  |
| MSTRG. 4108. 1 | 601  | 0. 46473 | 5. 714416504 | 1  |
| MSTRG. 4108. 2 | 548  | 0. 45882 | 5. 61114502  | 1  |
| MSTRG. 4108. 3 | 545  | 0. 42783 | 5. 61114502  | -1 |
| MSTRG. 4108. 6 | 92   | 0. 31484 | 6. 484436035 | 1  |
| MSTRG. 4108. 5 | 601  | 0. 44552 | 5. 714416504 | 1  |
| MSTRG. 4116. 1 | 205  | 0. 3618  | 9. 062805176 | 1  |

|                |      |          |              |    |
|----------------|------|----------|--------------|----|
| MSTRG. 4122. 3 | 213  | 0. 28683 | 6. 709411621 | 1  |
| MSTRG. 4122. 2 | 593  | 0. 42364 | 5. 928527832 | 1  |
| MSTRG. 4122. 1 | 892  | 0. 31793 | 5. 43927002  | 1  |
| MSTRG. 4125. 3 | 353  | 0. 40597 | 9. 532287598 | 1  |
| MSTRG. 4129. 4 | 614  | 0. 43524 | 6. 308288574 | 1  |
| MSTRG. 4129. 7 | 614  | 0. 46094 | 6. 308288574 | 1  |
| MSTRG. 4129. 8 | 615  | 0. 4042  | 6. 308288574 | 1  |
| MSTRG. 4129. 9 | 613  | 0. 4042  | 6. 308288574 | 1  |
| MSTRG. 4130. 1 | 157  | 0. 3     | 7. 600280762 | 1  |
| MSTRG. 4143. 2 | 164  | 0. 37326 | 9. 867858887 | 1  |
| MSTRG. 4143. 4 | 29   | 0. 32935 | 10. 4463501  | -1 |
| MSTRG. 4143. 3 | 203  | 0. 31723 | 5. 101379395 | 1  |
| MSTRG. 4144. 1 | 7    | 0. 32134 | 6. 491027832 | 1  |
| MSTRG. 4143. 6 | 120  | 0. 33228 | 6. 411560059 | 1  |
| MSTRG. 4146. 2 | 127  | 0. 37398 | 10. 66571045 | 1  |
| MSTRG. 4147. 1 | 28   | 0. 40193 | 8. 500061035 | 1  |
| MSTRG. 4152. 2 | 102  | 0. 39387 | 5. 52947998  | 1  |
| MSTRG. 4131. 1 | 30   | 0. 38121 | 4. 426940918 | 1  |
| MSTRG. 4132. 3 | 351  | 0. 42594 | 8. 786437988 | 1  |
| MSTRG. 4132. 5 | 351  | 0. 33902 | 8. 786437988 | 1  |
| MSTRG. 4132. 6 | 351  | 0. 46564 | 8. 786437988 | 1  |
| MSTRG. 4133. 1 | 144  | 0. 32237 | 10. 28106689 | 1  |
| MSTRG. 4134. 1 | 231  | 0. 29367 | 9. 368347168 | 1  |
| MSTRG. 4139. 1 | 119  | 0. 28301 | 9. 124084473 | 1  |
| MSTRG. 4163. 2 | 1163 | 0. 38473 | 6. 648376465 | 1  |
| MSTRG. 4163. 1 | 1446 | 0. 3992  | 5. 868225098 | 1  |
| MSTRG. 4163. 3 | 352  | 0. 39645 | 5. 845275879 | 1  |
| MSTRG. 4163. 4 | 1446 | 0. 47095 | 5. 868225098 | 1  |
| MSTRG. 4163. 5 | 1163 | 0. 43053 | 6. 648376465 | 1  |
| MSTRG. 4163. 6 | 1123 | 0. 36558 | 6. 44732666  | 1  |
| MSTRG. 4163. 7 | 1446 | 0. 4605  | 5. 868225098 | 1  |
| MSTRG. 4162. 1 | 41   | 0. 37882 | 9. 224304199 | 1  |
| MSTRG. 4178. 5 | 337  | 0. 3     | 8. 663513184 | 1  |
| MSTRG. 4178. 3 | 336  | 0. 29615 | 9. 416809082 | 1  |
| MSTRG. 4178. 6 | 337  | 0. 46846 | 8. 663513184 | 1  |
| MSTRG. 4178. 4 | 222  | 0. 45876 | 9. 062683105 | 1  |
| MSTRG. 4178. 8 | 222  | 0. 43163 | 9. 062683105 | 1  |
| MSTRG. 4178. 7 | 337  | 0. 42187 | 8. 663513184 | 1  |
| MSTRG. 4183. 1 | 122  | 0. 33118 | 9. 390075684 | 1  |
| MSTRG. 4186. 1 | 187  | 0. 28385 | 10. 55657959 | 1  |
| MSTRG. 4186. 2 | 193  | 0. 32789 | 10. 54388428 | 1  |
| MSTRG. 4186. 3 | 63   | 0. 32746 | 11. 05340576 | 1  |
| MSTRG. 4187. 1 | 97   | 0. 33406 | 10. 14508057 | 1  |
| MSTRG. 4203. 3 | 181  | 0. 37307 | 9. 696716309 | 1  |
| MSTRG. 4203. 5 | 189  | 0. 41796 | 9. 375061035 | 1  |
| MSTRG. 4203. 2 | 297  | 0. 35489 | 9. 442077637 | 1  |
| MSTRG. 4203. 6 | 335  | 0. 4252  | 9. 38861084  | -1 |
| MSTRG. 4203. 7 | 121  | 0. 38619 | 9. 404846191 | 1  |
| MSTRG. 4213. 3 | 330  | 0. 40903 | 9. 990539551 | 1  |
| MSTRG. 4214. 1 | 85   | 0. 28683 | 10. 04046631 | 1  |
| MSTRG. 4216. 1 | 60   | 0. 33402 | 6. 497375488 | 1  |
| MSTRG. 4217. 3 | 86   | 0. 38478 | 8. 448059082 | 1  |
| MSTRG. 4226. 1 | 546  | 0. 38851 | 6. 460754395 | 1  |
| MSTRG. 4226. 2 | 422  | 0. 45237 | 5. 837463379 | 1  |



|                |      |          |              |    |
|----------------|------|----------|--------------|----|
| MSTRG. 4227. 1 | 59   | 0. 28234 | 6. 501159668 | 1  |
| MSTRG. 4226. 3 | 336  | 0. 40642 | 4. 909973145 | 1  |
| MSTRG. 4228. 7 | 300  | 0. 2906  | 10. 92266846 | 1  |
| MSTRG. 4228. 3 | 293  | 0. 28808 | 11. 01800537 | 1  |
| MSTRG. 4229. 4 | 209  | 0. 33518 | 5. 830993652 | 1  |
| MSTRG. 4229. 2 | 226  | 0. 28826 | 7. 67755127  | 1  |
| MSTRG. 4229. 3 | 336  | 0. 36207 | 8. 926330566 | 1  |
| MSTRG. 4230. 1 | 158  | 0. 38612 | 10. 00469971 | 1  |
| MSTRG. 4231. 1 | 44   | 0. 44866 | 9. 520812988 | -1 |
| MSTRG. 4219. 1 | 51   | 0. 42655 | 9. 969177246 | 1  |
| MSTRG. 4246. 3 | 151  | 0. 433   | 9. 911193848 | 1  |
| MSTRG. 4250. 5 | 61   | 0. 34723 | 9. 303283691 | 1  |
| MSTRG. 4256. 1 | 401  | 0. 43027 | 8. 61126709  | 1  |
| MSTRG. 4256. 3 | 392  | 0. 32819 | 8. 415466309 | 1  |
| MSTRG. 4256. 2 | 386  | 0. 32819 | 8. 424255371 | 1  |
| MSTRG. 4256. 4 | 407  | 0. 32819 | 8. 602722168 | 1  |
| MSTRG. 4257. 1 | 33   | 0. 37054 | 10. 14068604 | 1  |
| MSTRG. 4260. 3 | 365  | 0. 44825 | 4. 312194824 | 1  |
| MSTRG. 4260. 4 | 527  | 0. 39939 | 4. 329528809 | 1  |
| MSTRG. 4261. 3 | 751  | 0. 45085 | 5. 261291504 | 1  |
| MSTRG. 4261. 2 | 787  | 0. 45108 | 5. 485290527 | 1  |
| MSTRG. 4261. 4 | 667  | 0. 40702 | 5. 17755127  | 1  |
| MSTRG. 4262. 1 | 21   | 0. 40217 | 5. 30267334  | 1  |
| MSTRG. 4293. 3 | 141  | 0. 40397 | 9. 653015137 | -1 |
| MSTRG. 4293. 4 | 141  | 0. 35248 | 9. 653015137 | -1 |
| MSTRG. 4293. 5 | 143  | 0. 30068 | 9. 653015137 | -1 |
| MSTRG. 4293. 6 | 143  | 0. 35766 | 9. 653015137 | -1 |
| MSTRG. 4293. 7 | 143  | 0. 39873 | 9. 653015137 | -1 |
| MSTRG. 4296. 1 | 54   | 0. 42857 | 6. 707580566 | 1  |
| MSTRG. 4301. 2 | 562  | 0. 42528 | 6. 201965332 | 1  |
| MSTRG. 4301. 1 | 562  | 0. 42788 | 6. 201965332 | 1  |
| MSTRG. 4301. 3 | 562  | 0. 43914 | 6. 201965332 | 1  |
| MSTRG. 4301. 4 | 562  | 0. 45297 | 6. 201965332 | 1  |
| MSTRG. 4301. 5 | 562  | 0. 47131 | 6. 201965332 | 1  |
| MSTRG. 4301. 6 | 562  | 0. 44162 | 6. 201965332 | 1  |
| MSTRG. 4302. 1 | 251  | 0. 36732 | 10. 22979736 | 1  |
| MSTRG. 4303. 2 | 108  | 0. 30864 | 5. 546813965 | 1  |
| MSTRG. 4304. 2 | 96   | 0. 27837 | 10. 23626709 | 1  |
| MSTRG. 4297. 1 | 44   | 0. 39305 | 5. 292297363 | 1  |
| MSTRG. 4298. 1 | 74   | 0. 40783 | 9. 507019043 | 1  |
| MSTRG. 4312. 5 | 246  | 0. 41781 | 8. 632141113 | 1  |
| MSTRG. 4312. 4 | 1607 | 0. 4184  | 6. 986022949 | 1  |
| MSTRG. 4312. 2 | 2098 | 0. 46053 | 6. 352111816 | 1  |
| MSTRG. 4312. 1 | 2098 | 0. 38953 | 6. 352111816 | 1  |
| MSTRG. 4312. 3 | 2098 | 0. 4257  | 6. 352111816 | 1  |
| MSTRG. 4310. 2 | 185  | 0. 30523 | 6. 794128418 | 1  |
| MSTRG. 4317. 2 | 509  | 0. 28683 | 8. 661560059 | 1  |
| MSTRG. 4319. 1 | 269  | 0. 2921  | 9. 18145752  | 1  |
| MSTRG. 4319. 2 | 269  | 0. 29387 | 9. 18145752  | 1  |
| MSTRG. 4319. 3 | 195  | 0. 3     | 8. 752380371 | 1  |
| MSTRG. 4319. 4 | 116  | 0. 29615 | 10. 01800537 | 1  |
| MSTRG. 4319. 5 | 101  | 0. 28828 | 5. 652282715 | 1  |
| MSTRG. 4325. 2 | 375  | 0. 38344 | 6. 03717041  | 1  |
| MSTRG. 4325. 3 | 127  | 0. 36731 | 9. 950622559 | 1  |

|                 |      |          |              |    |
|-----------------|------|----------|--------------|----|
| MSTRG. 4326. 2  | 55   | 0. 30961 | 7. 79510498  | 1  |
| MSTRG. 4328. 2  | 351  | 0. 31303 | 8. 957336426 | 1  |
| MSTRG. 4328. 6  | 288  | 0. 37568 | 7. 747131348 | 1  |
| MSTRG. 4328. 5  | 412  | 0. 47691 | 6. 473083496 | -1 |
| MSTRG. 4328. 7  | 288  | 0. 46641 | 7. 747131348 | 1  |
| MSTRG. 4328. 11 | 295  | 0. 28842 | 8. 36932373  | 1  |
| MSTRG. 4329. 3  | 728  | 0. 41365 | 5. 039611816 | 1  |
| MSTRG. 4330. 1  | 17   | 0. 31911 | 8. 344665527 | -1 |
| MSTRG. 4335. 2  | 830  | 0. 38211 | 5. 149475098 | 1  |
| MSTRG. 4341. 1  | 123  | 0. 34664 | 9. 508361816 | 1  |
| MSTRG. 4341. 2  | 69   | 0. 37883 | 9. 697692871 | 1  |
| MSTRG. 4341. 3  | 51   | 0. 32247 | 10. 04400635 | 1  |
| MSTRG. 4343. 1  | 536  | 0. 46586 | 5. 761657715 | 1  |
| MSTRG. 4344. 1  | 87   | 0. 35745 | 7. 86932373  | 1  |
| MSTRG. 4340. 1  | 50   | 0. 38142 | 7. 770080566 | 1  |
| MSTRG. 4346. 2  | 114  | 0. 35415 | 9. 75592041  | 1  |
| MSTRG. 4345. 1  | 311  | 0. 37303 | 9. 340270996 | 1  |
| MSTRG. 4359. 2  | 2616 | 0. 43896 | 5. 768127441 | 1  |
| MSTRG. 4357. 1  | 462  | 0. 41003 | 7. 950256348 | 1  |
| MSTRG. 4358. 2  | 298  | 0. 36657 | 9. 885559082 | 1  |
| MSTRG. 4360. 2  | 475  | 0. 37281 | 8. 260070801 | 1  |
| MSTRG. 4361. 1  | 343  | 0. 35425 | 5. 624084473 | 1  |
| MSTRG. 4361. 3  | 253  | 0. 37526 | 5. 792175293 | 1  |
| MSTRG. 4363. 1  | 621  | 0. 43138 | 6. 729675293 | 1  |
| MSTRG. 4363. 2  | 593  | 0. 35987 | 6. 854187012 | 1  |
| MSTRG. 4363. 3  | 560  | 0. 46001 | 6. 360168457 | 1  |
| MSTRG. 4367. 4  | 205  | 0. 26913 | 10. 48443604 | 1  |
| MSTRG. 4367. 5  | 136  | 0. 27112 | 9. 341247559 | 1  |
| MSTRG. 4369. 1  | 241  | 0. 26999 | 5. 504699707 | 1  |
| MSTRG. 4365. 2  | 105  | 0. 45953 | 5. 543029785 | 1  |
| MSTRG. 4371. 1  | 193  | 0. 4758  | 4. 941711426 | 1  |
| MSTRG. 4371. 2  | 192  | 0. 46145 | 5. 053527832 | 1  |
| MSTRG. 4375. 1  | 59   | 0. 3549  | 9. 624694824 | 1  |
| MSTRG. 4372. 2  | 560  | 0. 38289 | 9. 089172363 | 1  |
| MSTRG. 4382. 1  | 37   | 0. 37214 | 5. 272399902 | 1  |
| MSTRG. 4388. 1  | 770  | 0. 34599 | 5. 027038574 | 1  |
| MSTRG. 4388. 3  | 911  | 0. 33805 | 4. 968688965 | 1  |
| MSTRG. 4388. 9  | 783  | 0. 31729 | 5. 179382324 | 1  |
| MSTRG. 4384. 2  | 92   | 0. 40143 | 5. 895568848 | 1  |
| MSTRG. 4390. 1  | 91   | 0. 33706 | 8. 88092041  | 1  |
| MSTRG. 4390. 2  | 91   | 0. 39063 | 8. 88092041  | 1  |
| MSTRG. 4390. 3  | 70   | 0. 38017 | 11. 70526123 | 1  |
| MSTRG. 4399. 1  | 47   | 0. 34961 | 9. 00579834  | 1  |
| MSTRG. 4400. 2  | 435  | 0. 458   | 8. 791442871 | 1  |
| MSTRG. 4401. 2  | 155  | 0. 28584 | 6. 495056152 | 1  |
| MSTRG. 4401. 3  | 656  | 0. 28584 | 8. 308776855 | 1  |
| MSTRG. 4399. 3  | 296  | 0. 42881 | 9. 405822754 | 1  |
| MSTRG. 4401. 5  | 155  | 0. 28584 | 6. 495056152 | 1  |
| MSTRG. 4401. 8  | 155  | 0. 28584 | 6. 495056152 | 1  |
| MSTRG. 4401. 9  | 155  | 0. 28419 | 6. 495056152 | 1  |
| MSTRG. 4401. 11 | 155  | 0. 28584 | 6. 495056152 | 1  |
| MSTRG. 4401. 12 | 155  | 0. 28584 | 6. 495056152 | 1  |
| MSTRG. 4401. 10 | 155  | 0. 28338 | 6. 495056152 | 1  |
| MSTRG. 4401. 13 | 155  | 0. 28419 | 6. 495056152 | 1  |

|                 |      |          |              |    |
|-----------------|------|----------|--------------|----|
| MSTRG. 4401. 14 | 155  | 0. 28419 | 6. 495056152 | 1  |
| MSTRG. 4401. 16 | 155  | 0. 28186 | 6. 495056152 | 1  |
| MSTRG. 4403. 1  | 354  | 0. 40917 | 8. 815490723 | 1  |
| MSTRG. 4403. 3  | 1665 | 0. 47841 | 8. 36920166  | 1  |
| MSTRG. 4404. 1  | 192  | 0. 28726 | 9. 229919434 | 1  |
| MSTRG. 4408. 1  | 71   | 0. 30411 | 9. 020324707 | 1  |
| MSTRG. 4409. 2  | 863  | 0. 44049 | 9. 167175293 | 1  |
| MSTRG. 4409. 3  | 720  | 0. 43545 | 9. 392150879 | 1  |
| MSTRG. 4411. 1  | 546  | 0. 36189 | 6. 765563965 | 1  |
| MSTRG. 4411. 2  | 546  | 0. 35685 | 6. 765563965 | 1  |
| MSTRG. 4412. 1  | 1421 | 0. 49693 | 4. 875915527 | 1  |
| MSTRG. 4412. 2  | 1362 | 0. 49693 | 4. 879455566 | 1  |
| MSTRG. 4412. 3  | 1362 | 0. 48942 | 4. 879455566 | 1  |
| MSTRG. 4413. 1  | 158  | 0. 29871 | 5. 956359863 | 1  |
| MSTRG. 4413. 2  | 158  | 0. 35162 | 5. 956359863 | 1  |
| MSTRG. 4413. 5  | 100  | 0. 40466 | 4. 350036621 | 1  |
| MSTRG. 4414. 2  | 115  | 0. 41617 | 4. 695739746 | 1  |
| MSTRG. 4418. 1  | 1163 | 0. 4538  | 4. 782775879 | 1  |
| MSTRG. 4420. 9  | 521  | 0. 3644  | 5. 975891113 | 1  |
| MSTRG. 4420. 10 | 737  | 0. 33492 | 6. 236755371 | 1  |
| MSTRG. 4420. 11 | 566  | 0. 34775 | 5. 843444824 | 1  |
| MSTRG. 4421. 1  | 109  | 0. 27097 | 9. 465148926 | 1  |
| MSTRG. 4422. 1  | 14   | 0. 36868 | 5. 945983887 | 1  |
| MSTRG. 4422. 2  | 24   | 0. 4128  | 8. 68170166  | 1  |
| MSTRG. 4423. 4  | 789  | 0. 48623 | 4. 513366699 | 1  |
| MSTRG. 4423. 5  | 903  | 0. 47972 | 4. 500549316 | 1  |
| MSTRG. 4424. 1  | 50   | 0. 42539 | 9. 871643066 | -1 |
| MSTRG. 4426. 4  | 440  | 0. 43408 | 8. 518981934 | 1  |
| MSTRG. 4428. 2  | 154  | 0. 33061 | 4. 641174316 | 1  |
| MSTRG. 4429. 1  | 82   | 0. 28711 | 10. 71710205 | 1  |
| MSTRG. 4431. 1  | 98   | 0. 32443 | 6. 398498535 | 1  |
| MSTRG. 4432. 2  | 124  | 0. 33128 | 6. 284729004 | 1  |
| MSTRG. 4434. 1  | 187  | 0. 3307  | 9. 239807129 | 1  |
| MSTRG. 4446. 2  | 104  | 0. 35804 | 5. 278015137 | 1  |
| MSTRG. 4446. 1  | 490  | 0. 44356 | 6. 862731934 | 1  |
| MSTRG. 4446. 4  | 517  | 0. 42962 | 7. 554138184 | 1  |
| MSTRG. 4448. 1  | 227  | 0. 27918 | 6. 330871582 | 1  |
| MSTRG. 4448. 2  | 227  | 0. 34497 | 6. 330871582 | 1  |
| MSTRG. 4449. 1  | 145  | 0. 28165 | 8. 950866699 | 1  |
| MSTRG. 4450. 1  | 66   | 0. 40215 | 6. 809753418 | 1  |
| MSTRG. 4451. 1  | 63   | 0. 32613 | 5. 780944824 | 1  |
| MSTRG. 4452. 1  | 90   | 0. 32097 | 10. 35638428 | 1  |
| MSTRG. 4454. 1  | 83   | 0. 41163 | 9. 127868652 | 1  |
| MSTRG. 4456. 1  | 42   | 0. 39955 | 6. 70916748  | -1 |
| MSTRG. 4443. 3  | 247  | 0. 38082 | 6. 702331543 | 1  |
| MSTRG. 4445. 1  | 126  | 0. 30816 | 6. 424743652 | 1  |
| MSTRG. 4462. 1  | 150  | 0. 3182  | 9. 728088379 | 1  |
| MSTRG. 4462. 2  | 150  | 0. 2895  | 9. 728088379 | 1  |
| MSTRG. 4463. 1  | 74   | 0. 30644 | 9. 915588379 | 1  |
| MSTRG. 4464. 1  | 122  | 0. 30595 | 9. 774230957 | 1  |
| MSTRG. 4465. 1  | 83   | 0. 38577 | 5. 852355957 | 1  |
| MSTRG. 4467. 4  | 266  | 0. 37328 | 5. 528747559 | 1  |
| MSTRG. 4470. 3  | 177  | 0. 31857 | 5. 316345215 | 1  |
| MSTRG. 4470. 4  | 177  | 0. 31208 | 5. 316345215 | 1  |

|                 |      |          |              |    |
|-----------------|------|----------|--------------|----|
| MSTRG. 4470. 5  | 177  | 0. 34593 | 5. 316345215 | 1  |
| MSTRG. 4473. 3  | 324  | 0. 37153 | 6. 23638916  | 1  |
| MSTRG. 4471. 2  | 54   | 0. 30808 | 9. 887756348 | -1 |
| MSTRG. 4471. 1  | 105  | 0. 3487  | 5. 356384277 | 1  |
| MSTRG. 4474. 5  | 525  | 0. 40511 | 5. 718566895 | 1  |
| MSTRG. 4474. 4  | 579  | 0. 44491 | 7. 797058105 | 1  |
| MSTRG. 4474. 7  | 579  | 0. 28338 | 7. 797058105 | 1  |
| MSTRG. 4474. 8  | 384  | 0. 28584 | 8. 864807129 | 1  |
| MSTRG. 4474. 10 | 612  | 0. 39926 | 9. 554016113 | 1  |
| MSTRG. 4474. 12 | 612  | 0. 3869  | 9. 554016113 | 1  |
| MSTRG. 4474. 13 | 343  | 0. 39961 | 10. 40606689 | 1  |
| MSTRG. 4474. 14 | 453  | 0. 37366 | 9. 964294434 | 1  |
| MSTRG. 4474. 11 | 791  | 0. 3869  | 9. 632995605 | 1  |
| MSTRG. 4479. 6  | 39   | 0. 43386 | 5. 053894043 | 1  |
| MSTRG. 4479. 4  | 91   | 0. 34512 | 4. 45111084  | 1  |
| MSTRG. 4479. 7  | 91   | 0. 3792  | 4. 45111084  | 1  |
| MSTRG. 4479. 2  | 147  | 0. 32962 | 4. 785583496 | 1  |
| MSTRG. 4479. 1  | 91   | 0. 47718 | 4. 45111084  | 1  |
| MSTRG. 4480. 2  | 147  | 0. 31665 | 5. 737487793 | 1  |
| MSTRG. 4481. 4  | 749  | 0. 31649 | 8. 76361084  | 1  |
| MSTRG. 4481. 5  | 787  | 0. 31325 | 8. 949645996 | 1  |
| MSTRG. 4481. 1  | 749  | 0. 31573 | 8. 76361084  | 1  |
| MSTRG. 4481. 2  | 749  | 0. 31974 | 8. 76361084  | 1  |
| MSTRG. 4477. 2  | 688  | 0. 41769 | 6. 696228027 | 1  |
| MSTRG. 4477. 3  | 517  | 0. 44688 | 5. 93157959  | 1  |
| MSTRG. 4477. 4  | 708  | 0. 40383 | 6. 718078613 | 1  |
| MSTRG. 4487. 1  | 461  | 0. 38439 | 5. 825866699 | 1  |
| MSTRG. 4488. 1  | 168  | 0. 28165 | 10. 24957275 | 1  |
| MSTRG. 4488. 2  | 168  | 0. 3     | 10. 24957275 | 1  |
| MSTRG. 4488. 3  | 168  | 0. 40021 | 10. 24957275 | 1  |
| MSTRG. 4494. 1  | 247  | 0. 28982 | 8. 379821777 | -1 |
| MSTRG. 4495. 1  | 192  | 0. 32762 | 5. 95892334  | 1  |
| MSTRG. 4494. 8  | 198  | 0. 33219 | 5. 737731934 | -1 |
| MSTRG. 4494. 9  | 208  | 0. 36504 | 10. 99237061 | 1  |
| MSTRG. 4496. 1  | 83   | 0. 33316 | 10. 81134033 | 1  |
| MSTRG. 4494. 10 | 224  | 0. 28982 | 8. 90435791  | 1  |
| MSTRG. 4494. 11 | 75   | 0. 2985  | 9. 895935059 | 1  |
| MSTRG. 4498. 1  | 183  | 0. 29607 | 11. 23468018 | 1  |
| MSTRG. 4494. 12 | 474  | 0. 3409  | 6. 245788574 | 1  |
| MSTRG. 4494. 13 | 54   | 0. 32229 | 4. 62677002  | 1  |
| MSTRG. 4499. 3  | 345  | 0. 41002 | 9. 357971191 | 1  |
| MSTRG. 4483. 6  | 721  | 0. 46703 | 4. 291564941 | 1  |
| MSTRG. 4483. 4  | 483  | 0. 46452 | 4. 209289551 | 1  |
| MSTRG. 4483. 5  | 777  | 0. 46985 | 4. 29486084  | 1  |
| MSTRG. 4483. 3  | 755  | 0. 46894 | 4. 321716309 | 1  |
| MSTRG. 4503. 1  | 55   | 0. 37113 | 11. 56085205 | 1  |
| MSTRG. 4504. 5  | 573  | 0. 35633 | 6. 45880127  | 1  |
| MSTRG. 4506. 1  | 77   | 0. 37932 | 4. 225891113 | 1  |
| MSTRG. 4515. 1  | 1207 | 0. 45036 | 6. 046936035 | 1  |
| MSTRG. 4516. 2  | 28   | 0. 39993 | 4. 078918457 | 1  |
| MSTRG. 4516. 1  | 28   | 0. 36309 | 4. 078918457 | 1  |
| MSTRG. 4520. 2  | 612  | 0. 37294 | 7. 481872559 | 1  |
| MSTRG. 4520. 4  | 571  | 0. 37294 | 7. 834777832 | 1  |
| MSTRG. 4521. 1  | 48   | 0. 38811 | 7. 679626465 | 1  |

|                 |      |          |              |    |
|-----------------|------|----------|--------------|----|
| MSTRG. 4533. 11 | 247  | 0. 31516 | 4. 840637207 | 1  |
| MSTRG. 4533. 7  | 186  | 0. 33899 | 4. 793029785 | 1  |
| MSTRG. 4533. 10 | 149  | 0. 31053 | 11. 90484619 | 1  |
| MSTRG. 4533. 3  | 245  | 0. 32002 | 4. 864562988 | 1  |
| MSTRG. 4533. 1  | 308  | 0. 33799 | 6. 082092285 | 1  |
| MSTRG. 4533. 2  | 282  | 0. 33799 | 5. 866271973 | 1  |
| MSTRG. 4533. 4  | 271  | 0. 32851 | 5. 010681152 | 1  |
| MSTRG. 4533. 8  | 271  | 0. 32416 | 5. 010681152 | 1  |
| MSTRG. 4533. 6  | 245  | 0. 31207 | 4. 864562988 | 1  |
| MSTRG. 4533. 5  | 280  | 0. 35811 | 5. 38848877  | 1  |
| MSTRG. 4523. 3  | 337  | 0. 39274 | 8. 33026123  | 1  |
| MSTRG. 4523. 4  | 335  | 0. 41074 | 8. 33026123  | 1  |
| MSTRG. 4524. 1  | 124  | 0. 27194 | 7. 716247559 | 1  |
| MSTRG. 4525. 1  | 146  | 0. 28126 | 8. 864929199 | 1  |
| MSTRG. 4538. 1  | 49   | 0. 30425 | 5. 362121582 | -1 |
| MSTRG. 4540. 1  | 184  | 0. 37292 | 8. 74041748  | -1 |
| MSTRG. 4541. 2  | 311  | 0. 39152 | 8. 012756348 | 1  |
| MSTRG. 4549. 1  | 33   | 0. 34644 | 9. 580871582 | 1  |
| MSTRG. 4552. 4  | 980  | 0. 42068 | 5. 388122559 | 1  |
| MSTRG. 4553. 1  | 94   | 0. 28307 | 10. 23895264 | 1  |
| MSTRG. 4543. 2  | 1789 | 0. 46697 | 6. 04901123  | 1  |
| MSTRG. 4543. 3  | 1832 | 0. 44852 | 6. 090759277 | 1  |
| MSTRG. 4562. 2  | 268  | 0. 28311 | 6. 454162598 | 1  |
| MSTRG. 4562. 3  | 214  | 0. 31656 | 8. 824890137 | 1  |
| MSTRG. 4564. 1  | 499  | 0. 40675 | 9. 219543457 | 1  |
| MSTRG. 4555. 2  | 1300 | 0. 46203 | 5. 72869873  | -1 |
| MSTRG. 4557. 1  | 33   | 0. 42542 | 5. 966369629 | 1  |
| MSTRG. 4559. 3  | 135  | 0. 4252  | 8. 927185059 | 1  |
| MSTRG. 4571. 1  | 151  | 0. 30415 | 6. 780944824 | 1  |
| MSTRG. 4572. 1  | 150  | 0. 29272 | 10. 39605713 | 1  |
| MSTRG. 4574. 1  | 81   | 0. 31662 | 5. 122741699 | 1  |
| MSTRG. 4578. 1  | 66   | 0. 35801 | 9. 20526123  | 1  |
| MSTRG. 4578. 3  | 66   | 0. 38532 | 9. 20526123  | 1  |
| MSTRG. 4579. 2  | 284  | 0. 41866 | 5. 02557373  | 1  |
| MSTRG. 4580. 2  | 93   | 0. 35668 | 6. 067199707 | 1  |
| MSTRG. 4592. 1  | 377  | 0. 28586 | 9. 953552246 | 1  |
| MSTRG. 4592. 2  | 324  | 0. 41323 | 9. 874938965 | 1  |
| MSTRG. 4594. 1  | 694  | 0. 39417 | 5. 473449707 | 1  |
| MSTRG. 4594. 2  | 997  | 0. 46446 | 5. 656555176 | 1  |
| MSTRG. 4594. 4  | 771  | 0. 42469 | 6. 128601074 | 1  |
| MSTRG. 4594. 6  | 264  | 0. 38788 | 7. 10369873  | 1  |
| MSTRG. 4594. 5  | 901  | 0. 45377 | 5. 884460449 | 1  |
| MSTRG. 4594. 7  | 394  | 0. 29308 | 6. 196716309 | 1  |
| MSTRG. 4595. 1  | 120  | 0. 33888 | 6. 863586426 | 1  |
| MSTRG. 4594. 9  | 102  | 0. 30804 | 7. 583068848 | 1  |
| MSTRG. 4594. 10 | 447  | 0. 4662  | 5. 479553223 | 1  |
| MSTRG. 4594. 11 | 162  | 0. 32234 | 6. 069885254 | 1  |
| MSTRG. 4585. 3  | 180  | 0. 3231  | 9. 31817627  | 1  |
| MSTRG. 4585. 4  | 89   | 0. 42795 | 7. 804748535 | 1  |
| MSTRG. 4585. 5  | 576  | 0. 3594  | 6. 601989746 | 1  |
| MSTRG. 4583. 1  | 40   | 0. 46182 | 9. 883605957 | 1  |
| MSTRG. 4588. 1  | 94   | 0. 36928 | 11. 49505615 | 1  |
| MSTRG. 4600. 1  | 108  | 0. 30394 | 6. 282775879 | 1  |
| MSTRG. 4600. 2  | 158  | 0. 28718 | 9. 805969238 | 1  |

|                 |      |          |              |    |
|-----------------|------|----------|--------------|----|
| MSTRG. 4600. 3  | 158  | 0. 27251 | 9. 805969238 | 1  |
| MSTRG. 4601. 3  | 578  | 0. 40513 | 9. 59564209  | 1  |
| MSTRG. 4601. 4  | 639  | 0. 39941 | 9. 361022949 | 1  |
| MSTRG. 4602. 1  | 160  | 0. 33228 | 9. 70904541  | 1  |
| MSTRG. 4603. 1  | 154  | 0. 41434 | 10. 76629639 | -1 |
| MSTRG. 4601. 8  | 136  | 0. 28209 | 8. 295471191 | 1  |
| MSTRG. 4601. 9  | 136  | 0. 36551 | 8. 295471191 | 1  |
| MSTRG. 4604. 1  | 380  | 0. 34169 | 7. 661560059 | 1  |
| MSTRG. 4604. 3  | 380  | 0. 41599 | 7. 661560059 | 1  |
| MSTRG. 4605. 7  | 335  | 0. 44932 | 4. 889465332 | 1  |
| MSTRG. 4605. 8  | 335  | 0. 39829 | 4. 889465332 | 1  |
| MSTRG. 4605. 4  | 335  | 0. 48884 | 4. 889465332 | 1  |
| MSTRG. 4605. 6  | 335  | 0. 45379 | 4. 889465332 | 1  |
| MSTRG. 4605. 9  | 297  | 0. 47691 | 4. 624328613 | 1  |
| MSTRG. 4605. 10 | 88   | 0. 31348 | 6. 247619629 | 1  |
| MSTRG. 4608. 3  | 38   | 0. 34559 | 7. 73248291  | -1 |
| MSTRG. 4608. 6  | 370  | 0. 42631 | 5. 065368652 | 1  |
| MSTRG. 4609. 2  | 523  | 0. 37593 | 8. 928527832 | 1  |
| MSTRG. 4609. 1  | 524  | 0. 3426  | 8. 928527832 | 1  |
| MSTRG. 4611. 1  | 23   | 0. 3783  | 12. 00848389 | 1  |
| MSTRG. 4615. 2  | 39   | 0. 42741 | 5. 463928223 | 1  |
| MSTRG. 4616. 2  | 1696 | 0. 47252 | 6. 49395752  | 1  |
| MSTRG. 4617. 1  | 91   | 0. 29343 | 5. 348327637 | 1  |
| MSTRG. 4618. 1  | 103  | 0. 29892 | 5. 336364746 | -1 |
| MSTRG. 4616. 3  | 86   | 0. 35922 | 4. 602233887 | 1  |
| MSTRG. 4627. 9  | 482  | 0. 4324  | 8. 27923584  | 1  |
| MSTRG. 4627. 10 | 510  | 0. 43359 | 8. 717834473 | 1  |
| MSTRG. 4627. 7  | 511  | 0. 43359 | 8. 717834473 | 1  |
| MSTRG. 4620. 2  | 253  | 0. 35915 | 6. 833312988 | 1  |
| MSTRG. 4632. 3  | 93   | 0. 31476 | 5. 832946777 | 1  |
| MSTRG. 4634. 9  | 632  | 0. 46988 | 9. 54107666  | 1  |
| MSTRG. 4634. 10 | 513  | 0. 47801 | 9. 624328613 | -1 |
| MSTRG. 4634. 13 | 500  | 0. 45173 | 9. 663513184 | 1  |
| MSTRG. 4706. 9  | 4082 | 0. 46703 | 5. 106262207 | 1  |
| MSTRG. 4706. 6  | 5359 | 0. 46417 | 5. 213928223 | 1  |
| MSTRG. 4706. 4  | 5422 | 0. 48089 | 5. 23626709  | 1  |
| MSTRG. 4706. 27 | 3062 | 0. 46514 | 5. 207092285 | 1  |
| MSTRG. 4706. 18 | 4077 | 0. 46672 | 5. 150939941 | 1  |
| MSTRG. 4706. 25 | 6579 | 0. 4565  | 5. 146057129 | 1  |
| MSTRG. 4706. 19 | 7405 | 0. 46173 | 5. 174255371 | 1  |
| MSTRG. 4706. 12 | 5380 | 0. 44636 | 5. 221496582 | 1  |
| MSTRG. 4706. 14 | 5364 | 0. 40652 | 5. 231506348 | 1  |
| MSTRG. 4706. 24 | 5401 | 0. 46785 | 5. 22869873  | 1  |
| MSTRG. 4706. 16 | 7447 | 0. 4565  | 5. 184753418 | 1  |
| MSTRG. 4706. 15 | 7447 | 0. 4565  | 5. 184753418 | 1  |
| MSTRG. 4706. 30 | 94   | 0. 29772 | 9. 206604004 | 1  |
| MSTRG. 4706. 31 | 127  | 0. 29788 | 9. 333557129 | 1  |
| MSTRG. 4706. 32 | 126  | 0. 27843 | 9. 120666504 | 1  |
| MSTRG. 4706. 33 | 204  | 0. 28002 | 11. 93414307 | 1  |
| MSTRG. 4648. 1  | 227  | 0. 32505 | 9. 29864502  | -1 |
| MSTRG. 4649. 1  | 78   | 0. 36965 | 10. 54095459 | 1  |
| MSTRG. 4649. 2  | 78   | 0. 32312 | 10. 54095459 | 1  |
| MSTRG. 4651. 1  | 280  | 0. 38233 | 5. 66986084  | 1  |
| MSTRG. 4660. 3  | 750  | 0. 44436 | 5. 351135254 | 1  |

|                 |      |          |              |    |
|-----------------|------|----------|--------------|----|
| MSTRG. 4654. 1  | 158  | 0. 31589 | 9. 82989502  | 1  |
| MSTRG. 4654. 2  | 205  | 0. 31702 | 10. 45233154 | 1  |
| MSTRG. 4666. 1  | 258  | 0. 44741 | 8. 72833252  | 1  |
| MSTRG. 4673. 2  | 354  | 0. 40648 | 5. 948791504 | 1  |
| MSTRG. 4673. 3  | 356  | 0. 46773 | 5. 963317871 | 1  |
| MSTRG. 4675. 2  | 436  | 0. 44777 | 8. 039978027 | 1  |
| MSTRG. 4679. 3  | 559  | 0. 46024 | 6. 031921387 | 1  |
| MSTRG. 4679. 2  | 472  | 0. 44819 | 6. 080505371 | 1  |
| MSTRG. 4679. 5  | 472  | 0. 46544 | 6. 080505371 | 1  |
| MSTRG. 4680. 6  | 957  | 0. 40525 | 10. 15716553 | 1  |
| MSTRG. 4680. 7  | 100  | 0. 32404 | 8. 407043457 | 1  |
| MSTRG. 4680. 8  | 97   | 0. 36948 | 8. 914245605 | 1  |
| MSTRG. 4677. 1  | 134  | 0. 35965 | 4. 810852051 | 1  |
| MSTRG. 4677. 4  | 134  | 0. 33478 | 4. 810852051 | 1  |
| MSTRG. 4682. 1  | 365  | 0. 44534 | 4. 783508301 | 1  |
| MSTRG. 4682. 2  | 146  | 0. 41508 | 4. 215759277 | 1  |
| MSTRG. 4687. 1  | 430  | 0. 45977 | 5. 932312012 | 1  |
| MSTRG. 4687. 5  | 430  | 0. 47276 | 5. 932312012 | 1  |
| MSTRG. 4687. 4  | 430  | 0. 46554 | 5. 932312012 | 1  |
| MSTRG. 4689. 1  | 860  | 0. 31    | 9. 256896973 | 1  |
| MSTRG. 4689. 2  | 857  | 0. 3842  | 9. 273742676 | 1  |
| MSTRG. 4691. 1  | 48   | 0. 30647 | 10. 00848389 | 1  |
| MSTRG. 4692. 2  | 721  | 0. 44087 | 5. 449890137 | 1  |
| MSTRG. 4698. 1  | 72   | 0. 27846 | 6. 229553223 | 1  |
| MSTRG. 4700. 1  | 121  | 0. 32396 | 11. 11956787 | 1  |
| MSTRG. 4701. 1  | 87   | 0. 29003 | 6. 868347168 | 1  |
| MSTRG. 4703. 2  | 1137 | 0. 42375 | 8. 483215332 | 1  |
| MSTRG. 4703. 1  | 453  | 0. 4091  | 8. 484558105 | 1  |
| MSTRG. 4703. 3  | 441  | 0. 4202  | 8. 749816895 | 1  |
| MSTRG. 4704. 1  | 126  | 0. 40062 | 9. 63861084  | 1  |
| MSTRG. 4703. 4  | 844  | 0. 39004 | 8. 33770752  | 1  |
| MSTRG. 4718. 3  | 317  | 0. 39385 | 8. 95916748  | 1  |
| MSTRG. 4718. 6  | 458  | 0. 35576 | 9. 218444824 | 1  |
| MSTRG. 4718. 8  | 183  | 0. 41366 | 8. 883605957 | 1  |
| MSTRG. 4705. 2  | 123  | 0. 32373 | 8. 879699707 | 1  |
| MSTRG. 4709. 2  | 32   | 0. 33258 | 10. 78643799 | -1 |
| MSTRG. 4709. 1  | 65   | 0. 28405 | 9. 298522949 | -1 |
| MSTRG. 4711. 4  | 1054 | 0. 38373 | 5. 877380371 | 1  |
| MSTRG. 4711. 5  | 1047 | 0. 40683 | 5. 936462402 | 1  |
| MSTRG. 4711. 6  | 1047 | 0. 38373 | 5. 936462402 | 1  |
| MSTRG. 4710. 1  | 127  | 0. 4215  | 5. 543518066 | 1  |
| MSTRG. 4725. 1  | 1291 | 0. 43094 | 5. 474182129 | 1  |
| MSTRG. 4725. 2  | 1291 | 0. 41144 | 5. 474182129 | 1  |
| MSTRG. 4725. 12 | 28   | 0. 3383  | 7. 942687988 | 1  |
| MSTRG. 4725. 10 | 1285 | 0. 4448  | 5. 473327637 | 1  |
| MSTRG. 4725. 11 | 1288 | 0. 40106 | 5. 474182129 | 1  |
| MSTRG. 4725. 9  | 1288 | 0. 41144 | 5. 474182129 | 1  |
| MSTRG. 4725. 13 | 1284 | 0. 40924 | 5. 473327637 | 1  |
| MSTRG. 4725. 16 | 1043 | 0. 40444 | 5. 280944824 | 1  |
| MSTRG. 4725. 17 | 1043 | 0. 43251 | 5. 280944824 | 1  |
| MSTRG. 4725. 18 | 1042 | 0. 43251 | 5. 280944824 | 1  |
| MSTRG. 4725. 19 | 1040 | 0. 43194 | 5. 280944824 | 1  |
| MSTRG. 4725. 20 | 1040 | 0. 40884 | 5. 280944824 | 1  |
| MSTRG. 4725. 21 | 866  | 0. 42158 | 5. 151062012 | 1  |

|                 |      |          |              |    |
|-----------------|------|----------|--------------|----|
| MSTRG. 4725. 22 | 1043 | 0. 43251 | 5. 280944824 | 1  |
| MSTRG. 4722. 3  | 147  | 0. 30852 | 11. 60797119 | -1 |
| MSTRG. 4729. 1  | 126  | 0. 45578 | 6. 829528809 | 1  |
| MSTRG. 4734. 4  | 878  | 0. 42805 | 7. 123962402 | 1  |
| MSTRG. 4734. 5  | 680  | 0. 46218 | 5. 89263916  | 1  |
| MSTRG. 4735. 1  | 124  | 0. 44973 | 7. 00189209  | 1  |
| MSTRG. 4735. 2  | 252  | 0. 40893 | 6. 592224121 | 1  |
| MSTRG. 4730. 1  | 186  | 0. 43877 | 9. 350891113 | -1 |
| MSTRG. 4731. 1  | 35   | 0. 30435 | 6. 683898926 | 1  |
| MSTRG. 4738. 1  | 38   | 0. 42192 | 9. 976623535 | 1  |
| MSTRG. 4741. 2  | 110  | 0. 28483 | 11. 53643799 | 1  |
| MSTRG. 4744. 1  | 96   | 0. 27879 | 9. 954284668 | 1  |
| MSTRG. 4746. 1  | 47   | 0. 32902 | 4. 629699707 | 1  |
| MSTRG. 4747. 3  | 1130 | 0. 36277 | 9. 117370605 | 1  |
| MSTRG. 4750. 1  | 71   | 0. 41818 | 10. 02935791 | -1 |
| MSTRG. 4751. 1  | 119  | 0. 35945 | 7. 983337402 | -1 |
| MSTRG. 4754. 1  | 793  | 0. 47418 | 9. 249572754 | 1  |
| MSTRG. 4754. 4  | 810  | 0. 45007 | 9. 171691895 | -1 |
| MSTRG. 4754. 5  | 413  | 0. 46717 | 9. 600646973 | 1  |
| MSTRG. 4754. 6  | 287  | 0. 45186 | 9. 731506348 | 1  |
| MSTRG. 4754. 7  | 287  | 0. 46197 | 9. 731506348 | 1  |
| MSTRG. 4752. 1  | 362  | 0. 40746 | 7. 114074707 | 1  |
| MSTRG. 4757. 1  | 108  | 0. 27739 | 11. 16522217 | 1  |
| MSTRG. 4758. 2  | 160  | 0. 36234 | 6. 589294434 | 1  |
| MSTRG. 4758. 3  | 124  | 0. 34713 | 8. 086853027 | 1  |
| MSTRG. 4761. 1  | 2624 | 0. 46788 | 8. 67401123  | 1  |
| MSTRG. 4761. 3  | 2624 | 0. 45792 | 8. 67401123  | 1  |
| MSTRG. 4761. 5  | 2624 | 0. 45709 | 8. 67401123  | 1  |
| MSTRG. 4762. 1  | 85   | 0. 3205  | 9. 409851074 | 1  |
| MSTRG. 4763. 1  | 238  | 0. 27194 | 9. 538269043 | 1  |
| MSTRG. 4767. 2  | 104  | 0. 28267 | 9. 414855957 | 1  |
| MSTRG. 4768. 1  | 103  | 0. 40305 | 9. 138244629 | -1 |
| MSTRG. 4767. 6  | 411  | 0. 44968 | 5. 499084473 | 1  |
| MSTRG. 4769. 1  | 111  | 0. 2845  | 8. 823547363 | 1  |
| MSTRG. 4767. 7  | 799  | 0. 37819 | 4. 475036621 | 1  |
| MSTRG. 4772. 2  | 1050 | 0. 46381 | 5. 480773926 | 1  |
| MSTRG. 4766. 1  | 34   | 0. 30112 | 7. 90045166  | 1  |
| MSTRG. 4766. 2  | 34   | 0. 33982 | 7. 90045166  | 1  |
| MSTRG. 4766. 3  | 39   | 0. 34768 | 9. 213684082 | 1  |
| MSTRG. 4774. 3  | 311  | 0. 45616 | 6. 843200684 | 1  |
| MSTRG. 4774. 2  | 312  | 0. 45475 | 6. 843200684 | 1  |
| MSTRG. 4781. 2  | 1208 | 0. 44915 | 6. 945983887 | 1  |
| MSTRG. 4785. 3  | 641  | 0. 48395 | 7. 126037598 | 1  |
| MSTRG. 4785. 6  | 390  | 0. 34395 | 9. 724304199 | 1  |
| MSTRG. 4782. 1  | 132  | 0. 28159 | 9. 044006348 | 1  |
| MSTRG. 4782. 3  | 132  | 0. 27592 | 9. 044006348 | 1  |
| MSTRG. 4787. 1  | 1084 | 0. 45248 | 6. 411071777 | 1  |
| MSTRG. 4787. 2  | 592  | 0. 38809 | 5. 243591309 | 1  |
| MSTRG. 4787. 3  | 1089 | 0. 44981 | 6. 501037598 | 1  |
| MSTRG. 4788. 1  | 209  | 0. 34575 | 8. 569519043 | 1  |
| MSTRG. 4789. 1  | 171  | 0. 41322 | 6. 990661621 | 1  |
| MSTRG. 4796. 1  | 429  | 0. 36607 | 6. 113464355 | 1  |
| MSTRG. 4800. 2  | 402  | 0. 44252 | 9. 306945801 | 1  |
| MSTRG. 4811. 1  | 69   | 0. 27866 | 10. 58502197 | 1  |



|                 |      |          |              |    |
|-----------------|------|----------|--------------|----|
| MSTRG. 4811. 3  | 69   | 0. 28031 | 10. 58502197 | 1  |
| MSTRG. 4813. 1  | 1609 | 0. 43202 | 5. 757751465 | 1  |
| MSTRG. 4814. 1  | 202  | 0. 23717 | 11. 10614014 | 1  |
| MSTRG. 4815. 1  | 20   | 0. 40123 | 12. 00006104 | 1  |
| MSTRG. 4826. 4  | 160  | 0. 35718 | 4. 914855957 | 1  |
| MSTRG. 4826. 5  | 300  | 0. 42337 | 5. 612854004 | 1  |
| MSTRG. 4826. 2  | 280  | 0. 43575 | 9. 507629395 | 1  |
| MSTRG. 4826. 3  | 1255 | 0. 45768 | 4. 746765137 | 1  |
| MSTRG. 4826. 10 | 1317 | 0. 41857 | 4. 837341309 | 1  |
| MSTRG. 4816. 1  | 114  | 0. 32522 | 9. 588317871 | 1  |
| MSTRG. 4818. 1  | 361  | 0. 39241 | 6. 145812988 | 1  |
| MSTRG. 4818. 2  | 361  | 0. 38268 | 6. 145812988 | 1  |
| MSTRG. 4818. 4  | 361  | 0. 36855 | 6. 145812988 | 1  |
| MSTRG. 4819. 1  | 28   | 0. 41346 | 5. 957092285 | 1  |
| MSTRG. 4830. 2  | 633  | 0. 46224 | 8. 973693848 | 1  |
| MSTRG. 4831. 4  | 426  | 0. 42764 | 6. 370056152 | 1  |
| MSTRG. 4831. 5  | 426  | 0. 43491 | 6. 370056152 | 1  |
| MSTRG. 4836. 1  | 571  | 0. 42077 | 7. 511413574 | 1  |
| MSTRG. 4836. 2  | 544  | 0. 40691 | 7. 131530762 | 1  |
| MSTRG. 4843. 1  | 40   | 0. 33117 | 9. 297912598 | 1  |
| MSTRG. 4844. 1  | 29   | 0. 40777 | 11. 34661865 | -1 |
| MSTRG. 4848. 1  | 61   | 0. 36875 | 6. 691955566 | 1  |
| MSTRG. 4849. 1  | 204  | 0. 33582 | 9. 034973145 | 1  |
| MSTRG. 4860. 1  | 142  | 0. 33458 | 9. 248962402 | 1  |
| MSTRG. 4861. 1  | 384  | 0. 44564 | 10. 05523682 | 1  |
| MSTRG. 4861. 2  | 1235 | 0. 46121 | 9. 081848145 | 1  |
| MSTRG. 4870. 1  | 86   | 0. 41921 | 4. 494445801 | 1  |
| MSTRG. 4876. 1  | 350  | 0. 39256 | 9. 135314941 | 1  |
| MSTRG. 4877. 1  | 61   | 0. 38517 | 9. 26763916  | 1  |
| MSTRG. 4882. 1  | 67   | 0. 31164 | 8. 034362793 | 1  |
| MSTRG. 4882. 2  | 78   | 0. 34662 | 5. 875427246 | -1 |
| MSTRG. 4873. 1  | 93   | 0. 34698 | 6. 386413574 | 1  |
| MSTRG. 4886. 1  | 318  | 0. 39207 | 7. 236633301 | 1  |
| MSTRG. 4887. 1  | 1105 | 0. 46443 | 8. 817077637 | 1  |
| MSTRG. 4887. 2  | 414  | 0. 41435 | 8. 064880371 | -1 |
| MSTRG. 4895. 2  | 249  | 0. 31793 | 7. 778137207 | 1  |
| MSTRG. 4903. 1  | 80   | 0. 41812 | 4. 975646973 | 1  |
| MSTRG. 4903. 2  | 397  | 0. 32136 | 9. 344543457 | 1  |
| MSTRG. 4921. 2  | 3847 | 0. 4681  | 5. 028015137 | 1  |
| MSTRG. 4921. 3  | 3889 | 0. 45901 | 5. 016662598 | -1 |
| MSTRG. 4922. 2  | 443  | 0. 45824 | 8. 643981934 | 1  |
| MSTRG. 4924. 1  | 151  | 0. 30925 | 11. 31829834 | 1  |
| MSTRG. 4925. 1  | 211  | 0. 44355 | 9. 218444824 | 1  |
| MSTRG. 4928. 3  | 1091 | 0. 4594  | 5. 001159668 | 1  |
| MSTRG. 4928. 4  | 1091 | 0. 46584 | 5. 001159668 | 1  |
| MSTRG. 4929. 1  | 204  | 0. 26605 | 8. 128356934 | 1  |
| MSTRG. 4928. 6  | 73   | 0. 42635 | 6. 253601074 | -1 |
| MSTRG. 4930. 1  | 183  | 0. 34403 | 10. 64532471 | 1  |
| MSTRG. 4928. 7  | 556  | 0. 41511 | 4. 915466309 | 1  |
| MSTRG. 4912. 2  | 301  | 0. 42759 | 6. 491394043 | 1  |
| MSTRG. 4913. 1  | 221  | 0. 40766 | 5. 447937012 | 1  |
| MSTRG. 4913. 3  | 221  | 0. 34973 | 5. 447937012 | 1  |
| MSTRG. 4913. 4  | 221  | 0. 35948 | 5. 447937012 | 1  |
| MSTRG. 4920. 1  | 46   | 0. 44017 | 11. 63653564 | 1  |

|                 |      |          |              |    |
|-----------------|------|----------|--------------|----|
| MSTRG. 4942. 1  | 82   | 0. 30664 | 8. 678039551 | -1 |
| MSTRG. 4950. 1  | 79   | 0. 32124 | 9. 73260498  | -1 |
| MSTRG. 4951. 2  | 125  | 0. 29772 | 10. 25799561 | 1  |
| MSTRG. 4953. 1  | 127  | 0. 4387  | 11. 00579834 | 1  |
| MSTRG. 4961. 1  | 1312 | 0. 41088 | 5. 403137207 | 1  |
| MSTRG. 4961. 7  | 569  | 0. 36837 | 5. 40826416  | 1  |
| MSTRG. 4961. 4  | 1312 | 0. 41169 | 5. 403137207 | 1  |
| MSTRG. 4961. 5  | 1312 | 0. 40301 | 5. 403137207 | 1  |
| MSTRG. 4961. 6  | 774  | 0. 38046 | 6. 304626465 | 1  |
| MSTRG. 4961. 10 | 1294 | 0. 40813 | 5. 328186035 | 1  |
| MSTRG. 4961. 8  | 1312 | 0. 40813 | 5. 403137207 | 1  |
| MSTRG. 4961. 9  | 1312 | 0. 40813 | 5. 403137207 | 1  |
| MSTRG. 4961. 12 | 472  | 0. 47438 | 5. 014953613 | 1  |
| MSTRG. 4961. 11 | 1089 | 0. 41088 | 5. 059631348 | 1  |
| MSTRG. 4961. 13 | 1312 | 0. 41088 | 5. 403137207 | 1  |
| MSTRG. 4961. 15 | 1312 | 0. 41088 | 5. 403137207 | 1  |
| MSTRG. 4961. 14 | 1312 | 0. 41088 | 5. 403137207 | 1  |
| MSTRG. 4962. 1  | 51   | 0. 34852 | 4. 427185059 | 1  |
| MSTRG. 4963. 1  | 86   | 0. 35663 | 4. 375915527 | 1  |
| MSTRG. 4964. 1  | 114  | 0. 28165 | 9. 298522949 | 1  |
| MSTRG. 4965. 1  | 114  | 0. 27289 | 4. 550598145 | 1  |
| MSTRG. 4965. 2  | 174  | 0. 26822 | 9. 585998535 | 1  |
| MSTRG. 4965. 3  | 114  | 0. 26381 | 4. 55645752  | 1  |
| MSTRG. 4966. 1  | 12   | 0. 43729 | 3. 998840332 | -1 |
| MSTRG. 4967. 1  | 50   | 0. 31769 | 10. 27044678 | 1  |
| MSTRG. 4961. 17 | 171  | 0. 31899 | 6. 96270752  | 1  |
| MSTRG. 4955. 1  | 62   | 0. 32361 | 11. 00006104 | 1  |
| MSTRG. 4956. 1  | 39   | 0. 46058 | 8. 211853027 | 1  |
| MSTRG. 4959. 3  | 620  | 0. 43581 | 8. 837341309 | 1  |
| MSTRG. 4960. 1  | 64   | 0. 32514 | 7. 733825684 | 1  |
| MSTRG. 4975. 2  | 316  | 0. 39367 | 9. 211853027 | -1 |
| MSTRG. 4980. 10 | 561  | 0. 43948 | 6. 299255371 | 1  |
| MSTRG. 4980. 4  | 561  | 0. 40969 | 6. 299255371 | 1  |
| MSTRG. 4980. 9  | 561  | 0. 47667 | 6. 299255371 | 1  |
| MSTRG. 4980. 8  | 561  | 0. 45334 | 6. 299255371 | 1  |
| MSTRG. 4980. 5  | 561  | 0. 46458 | 6. 299255371 | 1  |
| MSTRG. 4980. 2  | 561  | 0. 45892 | 6. 299255371 | 1  |
| MSTRG. 4981. 2  | 368  | 0. 3461  | 6. 022033691 | 1  |
| MSTRG. 4985. 6  | 467  | 0. 39686 | 6. 085876465 | 1  |
| MSTRG. 4985. 8  | 410  | 0. 4388  | 6. 74432373  | 1  |
| MSTRG. 4990. 3  | 140  | 0. 28478 | 10. 23858643 | 1  |
| MSTRG. 4990. 4  | 40   | 0. 3696  | 6. 702941895 | 1  |
| MSTRG. 4991. 1  | 114  | 0. 27433 | 8. 945739746 | 1  |
| MSTRG. 4998. 3  | 337  | 0. 31233 | 7. 594543457 | 1  |
| MSTRG. 4998. 4  | 345  | 0. 30228 | 7. 098937988 | 1  |
| MSTRG. 4998. 5  | 344  | 0. 30228 | 7. 098937988 | 1  |
| MSTRG. 4998. 6  | 162  | 0. 34162 | 5. 371520996 | 1  |
| MSTRG. 4998. 7  | 84   | 0. 36099 | 8. 836730957 | 1  |
| MSTRG. 4988. 6  | 459  | 0. 46871 | 5. 67779541  | 1  |
| MSTRG. 5003. 1  | 54   | 0. 35766 | 9. 490905762 | 1  |
| MSTRG. 5020. 1  | 20   | 0. 39313 | 8. 93951416  | 1  |
| MSTRG. 5021. 2  | 275  | 0. 28159 | 6. 590515137 | 1  |
| MSTRG. 5046. 1  | 40   | 0. 32207 | 9. 48236084  | 1  |
| MSTRG. 5052. 1  | 64   | 0. 28982 | 9. 162536621 | 1  |

|                 |      |          |              |    |
|-----------------|------|----------|--------------|----|
| MSTRG. 5077. 2  | 477  | 0. 43802 | 5. 700378418 | 1  |
| MSTRG. 5077. 3  | 477  | 0. 43864 | 5. 700378418 | 1  |
| MSTRG. 5078. 1  | 62   | 0. 35947 | 7. 898010254 | 1  |
| MSTRG. 5106. 1  | 62   | 0. 47055 | 10. 54571533 | 1  |
| MSTRG. 5095. 2  | 152  | 0. 46597 | 9. 209899902 | 1  |
| MSTRG. 5137. 1  | 334  | 0. 30993 | 9. 260437012 | 1  |
| MSTRG. 5138. 1  | 21   | 0. 35052 | 4. 780578613 | -1 |
| MSTRG. 5137. 3  | 72   | 0. 3351  | 9. 696105957 | 1  |
| MSTRG. 5137. 2  | 154  | 0. 28683 | 9. 554626465 | 1  |
| MSTRG. 5137. 4  | 630  | 0. 44054 | 5. 111755371 | 1  |
| MSTRG. 5137. 5  | 90   | 0. 30897 | 9. 20111084  | 1  |
| MSTRG. 5137. 6  | 54   | 0. 34159 | 9. 416320801 | 1  |
| MSTRG. 5140. 2  | 161  | 0. 36912 | 10. 21173096 | -1 |
| MSTRG. 5137. 7  | 630  | 0. 43649 | 5. 111755371 | 1  |
| MSTRG. 5137. 8  | 630  | 0. 43649 | 5. 111755371 | 1  |
| MSTRG. 5137. 10 | 27   | 0. 34816 | 6. 515563965 | 1  |
| MSTRG. 5133. 1  | 957  | 0. 47604 | 6. 229553223 | 1  |
| MSTRG. 5133. 3  | 932  | 0. 37205 | 6. 315124512 | 1  |
| MSTRG. 5133. 4  | 114  | 0. 34336 | 4. 734802246 | 1  |
| MSTRG. 5134. 1  | 114  | 0. 38465 | 8. 47833252  | 1  |
| MSTRG. 5135. 1  | 55   | 0. 3401  | 11. 78594971 | 1  |
| MSTRG. 5160. 1  | 174  | 0. 28334 | 11. 04571533 | 1  |
| MSTRG. 5192. 2  | 583  | 0. 4311  | 6. 316833496 | 1  |
| MSTRG. 5192. 1  | 809  | 0. 45287 | 5. 497619629 | 1  |
| MSTRG. 5192. 3  | 161  | 0. 4626  | 4. 524230957 | 1  |
| MSTRG. 5192. 4  | 54   | 0. 38527 | 3. 798522949 | 1  |
| MSTRG. 5196. 1  | 56   | 0. 39693 | 9. 989807129 | 1  |
| MSTRG. 5201. 1  | 85   | 0. 39225 | 6. 888000488 | -1 |
| MSTRG. 5209. 1  | 29   | 0. 32803 | 5. 999328613 | 1  |
| MSTRG. 5236. 1  | 4227 | 0. 46618 | 5. 889831543 | 1  |
| MSTRG. 5236. 3  | 3279 | 0. 45148 | 6. 166931152 | 1  |
| MSTRG. 5237. 1  | 130  | 0. 30289 | 9. 800476074 | 1  |
| MSTRG. 5236. 6  | 1102 | 0. 42309 | 5. 467468262 | 1  |
| MSTRG. 5238. 5  | 431  | 0. 39059 | 8. 225524902 | 1  |
| MSTRG. 5217. 3  | 810  | 0. 36009 | 5. 859558105 | 1  |
| MSTRG. 5217. 4  | 583  | 0. 4637  | 6. 405456543 | 1  |
| MSTRG. 5218. 1  | 81   | 0. 27289 | 9. 063781738 | 1  |
| MSTRG. 5226. 1  | 198  | 0. 31849 | 9. 895080566 | 1  |
| MSTRG. 5247. 1  | 521  | 0. 34626 | 8. 425109863 | 1  |
| MSTRG. 5249. 2  | 313  | 0. 35072 | 6. 674743652 | 1  |
| MSTRG. 5249. 3  | 276  | 0. 47    | 5. 718322754 | 1  |
| MSTRG. 5249. 4  | 265  | 0. 37122 | 5. 57232666  | 1  |
| MSTRG. 5250. 1  | 58   | 0. 3447  | 5. 410705566 | 1  |
| MSTRG. 5250. 2  | 164  | 0. 29607 | 7. 656677246 | 1  |
| MSTRG. 5232. 1  | 555  | 0. 40612 | 6. 399963379 | 1  |
| MSTRG. 5240. 3  | 87   | 0. 31608 | 6. 876403809 | 1  |
| MSTRG. 5252. 4  | 180  | 0. 25937 | 10. 25152588 | 1  |
| MSTRG. 5252. 3  | 180  | 0. 43543 | 10. 25152588 | 1  |
| MSTRG. 5252. 10 | 138  | 0. 35695 | 9. 677062988 | 1  |
| MSTRG. 5256. 1  | 67   | 0. 40047 | 8. 445129395 | 1  |
| MSTRG. 5257. 1  | 165  | 0. 33102 | 10. 09307861 | 1  |
| MSTRG. 5257. 3  | 89   | 0. 35108 | 11. 42242432 | 1  |
| MSTRG. 5257. 5  | 140  | 0. 29615 | 10. 04656982 | 1  |
| MSTRG. 5257. 6  | 140  | 0. 26594 | 10. 04656982 | 1  |

|                |      |          |              |    |
|----------------|------|----------|--------------|----|
| MSTRG. 5258. 1 | 57   | 0. 29319 | 4. 49029541  | 1  |
| MSTRG. 5260. 1 | 158  | 0. 4329  | 9. 895935059 | 1  |
| MSTRG. 5261. 4 | 330  | 0. 37705 | 5. 920349121 | 1  |
| MSTRG. 5261. 5 | 353  | 0. 39263 | 9. 561706543 | 1  |
| MSTRG. 5265. 1 | 66   | 0. 33455 | 10. 04217529 | 1  |
| MSTRG. 5254. 1 | 157  | 0. 45356 | 8. 643005371 | 1  |
| MSTRG. 5285. 2 | 1063 | 0. 43305 | 8. 866882324 | 1  |
| MSTRG. 5285. 3 | 658  | 0. 44629 | 9. 074035645 | 1  |
| MSTRG. 5285. 4 | 777  | 0. 45123 | 8. 605651855 | 1  |
| MSTRG. 5286. 1 | 52   | 0. 42744 | 8. 338317871 | 1  |
| MSTRG. 5285. 5 | 913  | 0. 45185 | 8. 613342285 | 1  |
| MSTRG. 5288. 2 | 344  | 0. 35663 | 7. 047058105 | 1  |
| MSTRG. 5289. 1 | 145  | 0. 29747 | 6. 377502441 | -1 |
| MSTRG. 5293. 1 | 600  | 0. 4745  | 6. 515197754 | 1  |
| MSTRG. 5297. 5 | 110  | 0. 37002 | 3. 683288574 | 1  |
| MSTRG. 5298. 1 | 80   | 0. 28923 | 9. 897766113 | 1  |
| MSTRG. 5297. 6 | 191  | 0. 33254 | 5. 451477051 | 1  |
| MSTRG. 5297. 7 | 17   | 0. 38481 | 9. 522644043 | 1  |
| MSTRG. 5297. 8 | 17   | 0. 40865 | 9. 522644043 | 1  |
| MSTRG. 5299. 3 | 65   | 0. 39301 | 6. 68939209  | 1  |
| MSTRG. 5300. 1 | 57   | 0. 32293 | 8. 705871582 | 1  |
| MSTRG. 5301. 1 | 915  | 0. 4294  | 5. 379943848 | 1  |
| MSTRG. 5301. 2 | 32   | 0. 28362 | 3. 584411621 | 1  |
| MSTRG. 5301. 4 | 915  | 0. 4254  | 5. 379943848 | 1  |
| MSTRG. 5301. 8 | 915  | 0. 42811 | 5. 379943848 | 1  |
| MSTRG. 5301. 7 | 915  | 0. 42925 | 5. 379943848 | 1  |
| MSTRG. 5301. 3 | 915  | 0. 42925 | 5. 379943848 | 1  |
| MSTRG. 5301. 6 | 915  | 0. 42815 | 5. 379943848 | 1  |
| MSTRG. 5301. 5 | 915  | 0. 42956 | 5. 379943848 | 1  |
| MSTRG. 5305. 1 | 137  | 0. 28982 | 6. 882263184 | 1  |
| MSTRG. 5305. 2 | 77   | 0. 29191 | 7. 669006348 | 1  |
| MSTRG. 5306. 1 | 189  | 0. 4099  | 9. 876525879 | 1  |
| MSTRG. 5307. 1 | 96   | 0. 32176 | 5. 303649902 | 1  |
| MSTRG. 5271. 1 | 43   | 0. 42336 | 9. 69744873  | -1 |
| MSTRG. 5275. 1 | 145  | 0. 31208 | 11. 64227295 | 1  |
| MSTRG. 5275. 2 | 145  | 0. 30431 | 11. 64227295 | 1  |
| MSTRG. 5276. 2 | 755  | 0. 4215  | 7. 951477051 | 1  |
| MSTRG. 5283. 2 | 573  | 0. 29595 | 4. 913024902 | 1  |
| MSTRG. 5283. 3 | 117  | 0. 36353 | 4. 765563965 | 1  |
| MSTRG. 5284. 1 | 95   | 0. 33098 | 9. 804016113 | 1  |
| MSTRG. 5310. 2 | 664  | 0. 40966 | 7. 771789551 | 1  |
| MSTRG. 5310. 3 | 519  | 0. 45957 | 7. 184387207 | 1  |
| MSTRG. 5312. 1 | 80   | 0. 35101 | 9. 559020996 | 1  |
| MSTRG. 5317. 1 | 86   | 0. 30176 | 9. 138000488 | 1  |
| MSTRG. 5324. 1 | 353  | 0. 40273 | 5. 047790527 | 1  |
| MSTRG. 5324. 2 | 1053 | 0. 45193 | 5. 545593262 | 1  |
| MSTRG. 5324. 3 | 130  | 0. 39682 | 4. 334655762 | 1  |
| MSTRG. 5331. 1 | 127  | 0. 31869 | 9. 844909668 | 1  |
| MSTRG. 5358. 2 | 77   | 0. 32472 | 6. 480529785 | -1 |
| MSTRG. 5359. 2 | 301  | 0. 43627 | 6. 933044434 | 1  |
| MSTRG. 5359. 3 | 213  | 0. 39986 | 6. 875427246 | 1  |
| MSTRG. 5363. 2 | 307  | 0. 34287 | 7. 047180176 | 1  |
| MSTRG. 5363. 4 | 307  | 0. 35155 | 7. 047180176 | 1  |
| MSTRG. 5363. 5 | 307  | 0. 32072 | 7. 047180176 | 1  |

|                |      |          |              |    |
|----------------|------|----------|--------------|----|
| MSTRG. 5365. 2 | 384  | 0. 43428 | 5. 597595215 | 1  |
| MSTRG. 5354. 2 | 3304 | 0. 43732 | 5. 479797363 | 1  |
| MSTRG. 5354. 3 | 434  | 0. 46174 | 5. 036193848 | 1  |
| MSTRG. 5370. 2 | 81   | 0. 44445 | 5. 718933105 | 1  |
| MSTRG. 5382. 1 | 193  | 0. 38455 | 9. 466491699 | 1  |
| MSTRG. 5384. 1 | 76   | 0. 3118  | 7. 944641113 | 1  |
| MSTRG. 5383. 7 | 154  | 0. 29343 | 5. 958557129 | 1  |
| MSTRG. 5385. 2 | 69   | 0. 34692 | 4. 817687988 | 1  |
| MSTRG. 5386. 1 | 686  | 0. 37065 | 4. 89276123  | 1  |
| MSTRG. 5386. 3 | 676  | 0. 37933 | 5. 364685059 | 1  |
| MSTRG. 5386. 4 | 702  | 0. 44752 | 4. 835266113 | 1  |
| MSTRG. 5386. 5 | 686  | 0. 4469  | 4. 89276123  | 1  |
| MSTRG. 5386. 7 | 717  | 0. 4546  | 5. 00604248  | 1  |
| MSTRG. 5386. 9 | 60   | 0. 36013 | 9. 381530762 | 1  |
| MSTRG. 5387. 1 | 175  | 0. 30387 | 9. 75201416  | 1  |
| MSTRG. 5388. 1 | 143  | 0. 28498 | 6. 255065918 | 1  |
| MSTRG. 5389. 1 | 151  | 0. 27639 | 9. 434509277 | 1  |
| MSTRG. 5391. 1 | 91   | 0. 33102 | 9. 23638916  | 1  |
| MSTRG. 5377. 3 | 734  | 0. 33519 | 10. 0302124  | 1  |
| MSTRG. 5377. 2 | 734  | 0. 32651 | 10. 0302124  | 1  |
| MSTRG. 5377. 1 | 858  | 0. 33519 | 9. 818664551 | 1  |
| MSTRG. 5392. 1 | 491  | 0. 37416 | 6. 721618652 | 1  |
| MSTRG. 5392. 2 | 124  | 0. 43242 | 9. 274475098 | 1  |
| MSTRG. 5393. 2 | 233  | 0. 29054 | 11. 67767334 | 1  |
| MSTRG. 5401. 3 | 58   | 0. 37915 | 10. 37542725 | 1  |
| MSTRG. 5401. 2 | 94   | 0. 35115 | 9. 659973145 | 1  |
| MSTRG. 5401. 1 | 58   | 0. 40428 | 10. 37542725 | 1  |
| MSTRG. 5402. 3 | 512  | 0. 40724 | 5. 813049316 | 1  |
| MSTRG. 5402. 4 | 141  | 0. 3351  | 4. 329650879 | 1  |
| MSTRG. 5403. 1 | 78   | 0. 4221  | 6. 715515137 | 1  |
| MSTRG. 5404. 2 | 843  | 0. 47729 | 5. 801330566 | 1  |
| MSTRG. 5404. 1 | 829  | 0. 35496 | 5. 818054199 | 1  |
| MSTRG. 5404. 3 | 829  | 0. 42123 | 5. 818054199 | 1  |
| MSTRG. 5405. 1 | 67   | 0. 39411 | 5. 509338379 | 1  |
| MSTRG. 5404. 4 | 215  | 0. 50678 | 6. 434509277 | 1  |
| MSTRG. 5408. 4 | 240  | 0. 44189 | 9. 597106934 | 1  |
| MSTRG. 5399. 1 | 504  | 0. 37276 | 8. 422912598 | 1  |
| MSTRG. 5399. 2 | 503  | 0. 37276 | 8. 562805176 | 1  |
| MSTRG. 5412. 1 | 110  | 0. 29332 | 5. 04876709  | 1  |
| MSTRG. 5413. 2 | 1786 | 0. 41699 | 4. 820129395 | 1  |
| MSTRG. 5414. 1 | 46   | 0. 37409 | 6. 494812012 | -1 |
| MSTRG. 5416. 3 | 732  | 0. 41173 | 9. 176818848 | 1  |
| MSTRG. 5417. 1 | 205  | 0. 43078 | 9. 336120605 | -1 |
| MSTRG. 5419. 7 | 588  | 0. 46347 | 4. 883239746 | 1  |
| MSTRG. 5419. 6 | 433  | 0. 36408 | 4. 779602051 | 1  |
| MSTRG. 5419. 8 | 324  | 0. 38729 | 4. 760437012 | 1  |
| MSTRG. 5440. 1 | 58   | 0. 44861 | 5. 074645996 | -1 |
| MSTRG. 5445. 2 | 409  | 0. 39109 | 8. 480041504 | 1  |
| MSTRG. 5491. 1 | 345  | 0. 31802 | 10. 1317749  | 1  |
| MSTRG. 5493. 1 | 172  | 0. 43283 | 7. 735046387 | 1  |
| MSTRG. 5493. 2 | 219  | 0. 39787 | 9. 377990723 | 1  |
| MSTRG. 5470. 2 | 161  | 0. 3076  | 8. 198303223 | 1  |
| MSTRG. 5471. 1 | 51   | 0. 36157 | 5. 601867676 | -1 |
| MSTRG. 5478. 3 | 451  | 0. 46537 | 7. 110900879 | 1  |

|                |      |          |              |    |
|----------------|------|----------|--------------|----|
| MSTRG. 5480. 1 | 455  | 0. 46605 | 5. 198059082 | 1  |
| MSTRG. 5514. 1 | 1701 | 0. 47176 | 6. 831970215 | 1  |
| MSTRG. 5515. 1 | 25   | 0. 37087 | 5. 897644043 | 1  |
| MSTRG. 5558. 2 | 126  | 0. 3     | 9. 299865723 | 1  |
| MSTRG. 5560. 1 | 192  | 0. 29691 | 8. 764831543 | 1  |
| MSTRG. 5561. 1 | 56   | 0. 31857 | 10. 40789795 | 1  |
| MSTRG. 5561. 2 | 74   | 0. 38562 | 9. 640930176 | 1  |
| MSTRG. 5562. 1 | 125  | 0. 29346 | 8. 706726074 | 1  |
| MSTRG. 5563. 1 | 63   | 0. 33851 | 7. 83795166  | 1  |
| MSTRG. 5564. 1 | 50   | 0. 31209 | 6. 675720215 | 1  |
| MSTRG. 5565. 1 | 64   | 0. 30861 | 5. 432922363 | 1  |
| MSTRG. 5558. 3 | 74   | 0. 40762 | 7. 101135254 | 1  |
| MSTRG. 5532. 1 | 223  | 0. 30419 | 7. 794494629 | 1  |
| MSTRG. 5533. 1 | 395  | 0. 44919 | 5. 690124512 | 1  |
| MSTRG. 5533. 2 | 93   | 0. 32244 | 9. 608947754 | 1  |
| MSTRG. 5539. 1 | 126  | 0. 42929 | 8. 529724121 | 1  |
| MSTRG. 5540. 1 | 76   | 0. 29367 | 7. 122497559 | 1  |
| MSTRG. 5538. 4 | 121  | 0. 36598 | 10. 12298584 | 1  |
| MSTRG. 5543. 1 | 576  | 0. 2908  | 10. 00823975 | 1  |
| MSTRG. 5543. 4 | 341  | 0. 34634 | 9. 694885254 | 1  |
| MSTRG. 5543. 2 | 322  | 0. 32293 | 9. 04083252  | 1  |
| MSTRG. 5543. 3 | 276  | 0. 34775 | 8. 146057129 | 1  |
| MSTRG. 5543. 7 | 276  | 0. 34547 | 8. 146057129 | 1  |
| MSTRG. 5543. 8 | 258  | 0. 32501 | 9. 606262207 | 1  |
| MSTRG. 5543. 9 | 152  | 0. 30576 | 8. 755310059 | 1  |
| MSTRG. 5549. 1 | 43   | 0. 44287 | 11. 06878662 | 1  |
| MSTRG. 5550. 2 | 461  | 0. 35806 | 9. 096252441 | 1  |
| MSTRG. 5552. 1 | 65   | 0. 33171 | 9. 59942627  | 1  |
| MSTRG. 5555. 4 | 402  | 0. 3696  | 9. 928039551 | 1  |
| MSTRG. 5555. 2 | 551  | 0. 34567 | 9. 718200684 | 1  |
| MSTRG. 5555. 3 | 748  | 0. 42183 | 9. 287536621 | 1  |
| MSTRG. 5570. 2 | 473  | 0. 44634 | 5. 892272949 | 1  |
| MSTRG. 5570. 4 | 570  | 0. 48975 | 5. 211975098 | 1  |
| MSTRG. 5572. 2 | 128  | 0. 3818  | 9. 81072998  | 1  |
| MSTRG. 5574. 5 | 381  | 0. 46224 | 4. 674499512 | 1  |
| MSTRG. 5574. 6 | 432  | 0. 43298 | 4. 750061035 | 1  |
| MSTRG. 5574. 7 | 86   | 0. 41287 | 4. 389709473 | 1  |
| MSTRG. 5575. 3 | 623  | 0. 38005 | 5. 427429199 | 1  |
| MSTRG. 5575. 4 | 623  | 0. 42639 | 5. 427429199 | 1  |
| MSTRG. 5584. 1 | 61   | 0. 30378 | 8. 770324707 | 1  |
| MSTRG. 5591. 1 | 485  | 0. 32122 | 6. 14276123  | 1  |
| MSTRG. 5591. 2 | 512  | 0. 3299  | 6. 633850098 | 1  |
| MSTRG. 5595. 3 | 377  | 0. 42488 | 9. 56854248  | 1  |
| MSTRG. 5594. 1 | 87   | 0. 33484 | 5. 082458496 | 1  |
| MSTRG. 5605. 2 | 238  | 0. 33802 | 6. 640930176 | 1  |
| MSTRG. 5606. 2 | 93   | 0. 42866 | 9. 512756348 | 1  |
| MSTRG. 5608. 1 | 91   | 0. 34972 | 9. 351989746 | 1  |
| MSTRG. 5610. 3 | 501  | 0. 34777 | 5. 12322998  | 1  |
| MSTRG. 5615. 1 | 138  | 0. 28432 | 9. 408630371 | 1  |
| MSTRG. 5618. 3 | 307  | 0. 47928 | 8. 29486084  | 1  |
| MSTRG. 5612. 1 | 473  | 0. 42254 | 7. 604187012 | 1  |
| MSTRG. 5627. 1 | 196  | 0. 29772 | 9. 773864746 | 1  |
| MSTRG. 5628. 1 | 54   | 0. 33909 | 9. 300598145 | -1 |
| MSTRG. 5629. 1 | 85   | 0. 32826 | 9. 352478027 | 1  |

|                 |      |          |              |    |
|-----------------|------|----------|--------------|----|
| MSTRG. 5629. 2  | 81   | 0. 40011 | 5. 079528809 | 1  |
| MSTRG. 5627. 3  | 179  | 0. 32886 | 9. 335632324 | 1  |
| MSTRG. 5627. 4  | 162  | 0. 28982 | 10. 48272705 | 1  |
| MSTRG. 5627. 5  | 184  | 0. 3     | 9. 512634277 | 1  |
| MSTRG. 5627. 6  | 118  | 0. 29772 | 9. 297302246 | 1  |
| MSTRG. 5627. 7  | 179  | 0. 2921  | 9. 335632324 | 1  |
| MSTRG. 5627. 8  | 160  | 0. 29772 | 9. 690124512 | 1  |
| MSTRG. 5627. 9  | 160  | 0. 29772 | 9. 690124512 | 1  |
| MSTRG. 5627. 10 | 112  | 0. 28883 | 9. 010559082 | 1  |
| MSTRG. 5627. 11 | 112  | 0. 28883 | 9. 010559082 | 1  |
| MSTRG. 5627. 12 | 112  | 0. 29268 | 9. 010559082 | 1  |
| MSTRG. 5627. 13 | 130  | 0. 29088 | 5. 261779785 | 1  |
| MSTRG. 5627. 14 | 196  | 0. 28982 | 9. 773864746 | 1  |
| MSTRG. 5631. 1  | 85   | 0. 29772 | 7. 636779785 | 1  |
| MSTRG. 5632. 1  | 121  | 0. 28683 | 9. 578796387 | 1  |
| MSTRG. 5633. 1  | 105  | 0. 28923 | 6. 635681152 | 1  |
| MSTRG. 5633. 2  | 95   | 0. 28683 | 9. 299743652 | 1  |
| MSTRG. 5634. 1  | 186  | 0. 37574 | 10. 24713135 | 1  |
| MSTRG. 5632. 2  | 175  | 0. 29367 | 8. 769714355 | 1  |
| MSTRG. 5634. 2  | 186  | 0. 29871 | 10. 24713135 | 1  |
| MSTRG. 5635. 3  | 817  | 0. 48747 | 5. 338195801 | 1  |
| MSTRG. 5636. 1  | 125  | 0. 29619 | 10. 70489502 | 1  |
| MSTRG. 5621. 2  | 301  | 0. 32244 | 5. 541687012 | 1  |
| MSTRG. 5624. 1  | 316  | 0. 29367 | 9. 223449707 | 1  |
| MSTRG. 5624. 2  | 118  | 0. 32501 | 10. 59783936 | 1  |
| MSTRG. 5638. 1  | 49   | 0. 3285  | 8. 841491699 | 1  |
| MSTRG. 5643. 3  | 183  | 0. 38726 | 5. 227111816 | 1  |
| MSTRG. 5642. 4  | 397  | 0. 28419 | 6. 340148926 | 1  |
| MSTRG. 5642. 5  | 167  | 0. 29088 | 10. 15155029 | 1  |
| MSTRG. 5661. 1  | 105  | 0. 33695 | 9. 451721191 | 1  |
| MSTRG. 5668. 3  | 82   | 0. 38257 | 9. 765441895 | -1 |
| MSTRG. 5669. 3  | 623  | 0. 43863 | 6. 628723145 | 1  |
| MSTRG. 5669. 4  | 571  | 0. 42886 | 6. 11907959  | 1  |
| MSTRG. 5669. 5  | 540  | 0. 44636 | 5. 823425293 | 1  |
| MSTRG. 5670. 1  | 39   | 0. 38269 | 6. 680236816 | 1  |
| MSTRG. 5671. 1  | 160  | 0. 34719 | 10. 44329834 | 1  |
| MSTRG. 5672. 1  | 24   | 0. 41413 | 6. 697937012 | 1  |
| MSTRG. 5667. 1  | 70   | 0. 36168 | 9. 384216309 | 1  |
| MSTRG. 5681. 1  | 1015 | 0. 32477 | 5. 288513184 | 1  |
| MSTRG. 5681. 5  | 762  | 0. 45031 | 5. 266174316 | -1 |
| MSTRG. 5681. 10 | 233  | 0. 35675 | 6. 996154785 | 1  |
| MSTRG. 5681. 7  | 266  | 0. 32477 | 8. 158874512 | 1  |
| MSTRG. 5681. 11 | 219  | 0. 35312 | 8. 752868652 | 1  |
| MSTRG. 5722. 15 | 704  | 0. 39702 | 9. 221984863 | 1  |
| MSTRG. 5726. 1  | 62   | 0. 29519 | 7. 739807129 | 1  |
| MSTRG. 5726. 2  | 85   | 0. 26797 | 9. 18560791  | 1  |
| MSTRG. 5722. 17 | 74   | 0. 35792 | 4. 657409668 | 1  |
| MSTRG. 5722. 18 | 75   | 0. 28592 | 4. 477966309 | 1  |
| MSTRG. 5727. 1  | 125  | 0. 3458  | 8. 245056152 | 1  |
| MSTRG. 5728. 1  | 102  | 0. 2921  | 5. 138244629 | 1  |
| MSTRG. 5729. 1  | 67   | 0. 35123 | 9. 333557129 | 1  |
| MSTRG. 5730. 4  | 252  | 0. 46059 | 8. 485534668 | 1  |
| MSTRG. 5722. 19 | 704  | 0. 41957 | 9. 221984863 | 1  |
| MSTRG. 5722. 20 | 116  | 0. 28982 | 8. 958190918 | 1  |

|                 |      |          |              |    |
|-----------------|------|----------|--------------|----|
| MSTRG. 5722. 21 | 325  | 0. 36467 | 9. 287536621 | 1  |
| MSTRG. 5734. 1  | 68   | 0. 33425 | 6. 683044434 | 1  |
| MSTRG. 5722. 22 | 881  | 0. 39702 | 9. 183654785 | 1  |
| MSTRG. 5687. 2  | 782  | 0. 44958 | 7. 487609863 | 1  |
| MSTRG. 5690. 2  | 167  | 0. 37031 | 8. 719543457 | 1  |
| MSTRG. 5690. 3  | 193  | 0. 43244 | 9. 317565918 | 1  |
| MSTRG. 5695. 3  | 90   | 0. 27112 | 8. 957580566 | 1  |
| MSTRG. 5696. 1  | 199  | 0. 29603 | 8. 864685059 | 1  |
| MSTRG. 5695. 5  | 537  | 0. 27217 | 7. 010192871 | 1  |
| MSTRG. 5695. 6  | 537  | 0. 32849 | 7. 010192871 | 1  |
| MSTRG. 5693. 1  | 54   | 0. 32101 | 8. 371276855 | 1  |
| MSTRG. 5699. 1  | 125  | 0. 30709 | 10. 14129639 | 1  |
| MSTRG. 5704. 3  | 305  | 0. 41067 | 6. 721984863 | 1  |
| MSTRG. 5707. 14 | 197  | 0. 40633 | 4. 709411621 | 1  |
| MSTRG. 5707. 17 | 197  | 0. 38052 | 4. 709411621 | 1  |
| MSTRG. 5707. 15 | 447  | 0. 44158 | 5. 187194824 | 1  |
| MSTRG. 5707. 11 | 197  | 0. 4573  | 4. 709411621 | 1  |
| MSTRG. 5707. 13 | 197  | 0. 45655 | 4. 709411621 | 1  |
| MSTRG. 5707. 16 | 197  | 0. 46221 | 4. 709411621 | 1  |
| MSTRG. 5707. 6  | 197  | 0. 465   | 4. 709411621 | 1  |
| MSTRG. 5707. 2  | 197  | 0. 46727 | 4. 709411621 | 1  |
| MSTRG. 5707. 5  | 197  | 0. 49342 | 4. 709411621 | 1  |
| MSTRG. 5707. 9  | 197  | 0. 47294 | 4. 709411621 | 1  |
| MSTRG. 5711. 3  | 224  | 0. 42272 | 9. 04498291  | 1  |
| MSTRG. 5713. 3  | 934  | 0. 43504 | 6. 679138184 | 1  |
| MSTRG. 5713. 4  | 922  | 0. 41249 | 6. 660095215 | 1  |
| MSTRG. 5713. 6  | 934  | 0. 35406 | 6. 679138184 | 1  |
| MSTRG. 5713. 5  | 828  | 0. 35778 | 9. 028625488 | 1  |
| MSTRG. 5717. 2  | 248  | 0. 33528 | 11. 56634521 | 1  |
| MSTRG. 5717. 1  | 754  | 0. 44523 | 6. 531677246 | 1  |
| MSTRG. 5717. 3  | 211  | 0. 35808 | 11. 58416748 | 1  |
| MSTRG. 5717. 4  | 1024 | 0. 43912 | 8. 352478027 | 1  |
| MSTRG. 5717. 5  | 964  | 0. 4638  | 7. 375915527 | 1  |
| MSTRG. 5715. 4  | 215  | 0. 30985 | 5. 08404541  | 1  |
| MSTRG. 5715. 3  | 153  | 0. 40133 | 5. 278259277 | 1  |
| MSTRG. 5716. 1  | 159  | 0. 32397 | 5. 481018066 | 1  |
| MSTRG. 5740. 3  | 293  | 0. 45231 | 8. 543518066 | 1  |
| MSTRG. 5742. 1  | 34   | 0. 34723 | 8. 49017334  | -1 |
| MSTRG. 5745. 3  | 181  | 0. 34787 | 6. 539367676 | 1  |
| MSTRG. 5745. 2  | 197  | 0. 31406 | 6. 250671387 | 1  |
| MSTRG. 5746. 8  | 135  | 0. 41475 | 7. 836608887 | 1  |
| MSTRG. 5746. 9  | 135  | 0. 37068 | 7. 836608887 | 1  |
| MSTRG. 5747. 1  | 294  | 0. 32989 | 9. 42388916  | 1  |
| MSTRG. 5746. 10 | 135  | 0. 31205 | 7. 836608887 | 1  |
| MSTRG. 5782. 1  | 81   | 0. 30807 | 5. 028259277 | 1  |
| MSTRG. 5757. 2  | 58   | 0. 35726 | 10. 22772217 | 1  |
| MSTRG. 5757. 1  | 58   | 0. 355   | 10. 22772217 | 1  |
| MSTRG. 5761. 1  | 1587 | 0. 36765 | 7. 007995605 | 1  |
| MSTRG. 5761. 2  | 1587 | 0. 36765 | 7. 007995605 | 1  |
| MSTRG. 5763. 2  | 169  | 0. 29343 | 10. 35968018 | 1  |
| MSTRG. 5762. 1  | 61   | 0. 3973  | 7. 707458496 | 1  |
| MSTRG. 5835. 1  | 84   | 0. 31553 | 6. 933532715 | 1  |
| MSTRG. 5835. 2  | 165  | 0. 28338 | 9. 438537598 | 1  |
| MSTRG. 5835. 3  | 86   | 0. 32642 | 6. 253723145 | 1  |



|                 |      |          |              |    |
|-----------------|------|----------|--------------|----|
| MSTRG. 5835. 4  | 184  | 0. 29202 | 9. 74041748  | 1  |
| MSTRG. 5835. 5  | 86   | 0. 28982 | 6. 202575684 | 1  |
| MSTRG. 5835. 6  | 105  | 0. 28982 | 8. 078918457 | 1  |
| MSTRG. 5835. 7  | 211  | 0. 2921  | 5. 667175293 | 1  |
| MSTRG. 5835. 9  | 133  | 0. 42315 | 9. 834655762 | 1  |
| MSTRG. 5836. 1  | 137  | 0. 29772 | 9. 685119629 | 1  |
| MSTRG. 5835. 11 | 118  | 0. 30816 | 10. 06536865 | 1  |
| MSTRG. 5837. 1  | 137  | 0. 29772 | 9. 362976074 | 1  |
| MSTRG. 5838. 1  | 81   | 0. 30247 | 6. 66973877  | 1  |
| MSTRG. 5835. 13 | 89   | 0. 31553 | 6. 808166504 | 1  |
| MSTRG. 5835. 12 | 142  | 0. 32762 | 9. 668395996 | 1  |
| MSTRG. 5835. 14 | 142  | 0. 29892 | 9. 668395996 | 1  |
| MSTRG. 5835. 15 | 142  | 0. 29892 | 9. 668395996 | 1  |
| MSTRG. 5835. 16 | 136  | 0. 31917 | 9. 957092285 | -1 |
| MSTRG. 5835. 17 | 164  | 0. 33359 | 9. 358703613 | 1  |
| MSTRG. 5835. 18 | 130  | 0. 31917 | 10. 02996826 | -1 |
| MSTRG. 5835. 20 | 275  | 0. 29595 | 9. 262268066 | 1  |
| MSTRG. 5835. 22 | 110  | 0. 31852 | 9. 097229004 | 1  |
| MSTRG. 5835. 23 | 156  | 0. 2921  | 5. 530334473 | 1  |
| MSTRG. 5835. 25 | 211  | 0. 2921  | 5. 667175293 | 1  |
| MSTRG. 5835. 26 | 88   | 0. 27234 | 8. 80279541  | 1  |
| MSTRG. 5835. 27 | 120  | 0. 2921  | 9. 79510498  | 1  |
| MSTRG. 5835. 28 | 82   | 0. 34787 | 7. 72088623  | 1  |
| MSTRG. 5835. 29 | 88   | 0. 31653 | 9. 170593262 | 1  |
| MSTRG. 5835. 30 | 86   | 0. 37681 | 8. 639831543 | 1  |
| MSTRG. 5840. 1  | 154  | 0. 38415 | 5. 213806152 | 1  |
| MSTRG. 5797. 1  | 1452 | 0. 37367 | 9. 714660645 | 1  |
| MSTRG. 5797. 6  | 837  | 0. 46023 | 6. 016784668 | 1  |
| MSTRG. 5797. 4  | 897  | 0. 43185 | 6. 106628418 | 1  |
| MSTRG. 5797. 3  | 897  | 0. 45917 | 6. 106628418 | 1  |
| MSTRG. 5797. 5  | 1118 | 0. 48132 | 8. 854553223 | 1  |
| MSTRG. 5797. 7  | 897  | 0. 47683 | 6. 106628418 | 1  |
| MSTRG. 5798. 1  | 155  | 0. 3208  | 9. 380187988 | 1  |
| MSTRG. 5802. 3  | 77   | 0. 27639 | 8. 797912598 | 1  |
| MSTRG. 5803. 1  | 38   | 0. 34721 | 4. 316101074 | 1  |
| MSTRG. 5805. 1  | 150  | 0. 29607 | 4. 617492676 | 1  |
| MSTRG. 5799. 1  | 33   | 0. 39249 | 10. 44647217 | -1 |
| MSTRG. 5815. 1  | 63   | 0. 48174 | 9. 019226074 | 1  |
| MSTRG. 5832. 1  | 4    | 0. 36474 | 8. 500061035 | 1  |
| MSTRG. 5834. 1  | 418  | 0. 46892 | 5. 876037598 | 1  |
| MSTRG. 5845. 3  | 931  | 0. 43876 | 8. 500183105 | -1 |
| MSTRG. 5845. 4  | 503  | 0. 39554 | 8. 629943848 | 1  |
| MSTRG. 5856. 2  | 377  | 0. 38833 | 7. 619812012 | 1  |
| MSTRG. 5858. 1  | 98   | 0. 33166 | 8. 809631348 | 1  |
| MSTRG. 5860. 1  | 116  | 0. 37877 | 7. 818664551 | 1  |
| MSTRG. 5862. 1  | 167  | 0. 37847 | 5. 238342285 | 1  |
| MSTRG. 5864. 1  | 505  | 0. 41689 | 8. 045349121 | 1  |
| MSTRG. 5865. 1  | 122  | 0. 31553 | 9. 691589355 | 1  |
| MSTRG. 5866. 1  | 51   | 0. 32359 | 6. 809265137 | 1  |
| MSTRG. 5867. 1  | 79   | 0. 35094 | 12. 15557861 | 1  |
| MSTRG. 5872. 5  | 553  | 0. 4464  | 8. 787902832 | 1  |
| MSTRG. 5873. 1  | 70   | 0. 27918 | 6. 385559082 | 1  |
| MSTRG. 5874. 2  | 232  | 0. 33013 | 8. 75958252  | 1  |
| MSTRG. 5874. 3  | 152  | 0. 3797  | 9. 483215332 | 1  |

|                |      |          |              |    |
|----------------|------|----------|--------------|----|
| MSTRG. 5874. 5 | 228  | 0. 35996 | 8. 553649902 | 1  |
| MSTRG. 5874. 4 | 228  | 0. 34079 | 8. 553649902 | 1  |
| MSTRG. 5877. 1 | 613  | 0. 37757 | 8. 41986084  | 1  |
| MSTRG. 5879. 1 | 95   | 0. 28683 | 6. 555114746 | 1  |
| MSTRG. 5885. 2 | 497  | 0. 41885 | 8. 64263916  | 1  |
| MSTRG. 5886. 1 | 32   | 0. 42351 | 12. 30426025 | 1  |
| MSTRG. 5890. 2 | 664  | 0. 4152  | 9. 546813965 | 1  |
| MSTRG. 5890. 3 | 664  | 0. 45918 | 9. 546813965 | 1  |
| MSTRG. 5891. 1 | 340  | 0. 42006 | 6. 831481934 | 1  |
| MSTRG. 5891. 2 | 340  | 0. 43291 | 6. 831481934 | 1  |
| MSTRG. 5891. 3 | 340  | 0. 41983 | 6. 831481934 | 1  |
| MSTRG. 5896. 2 | 393  | 0. 2785  | 9. 126159668 | 1  |
| MSTRG. 5897. 1 | 101  | 0. 3345  | 6. 00177002  | 1  |
| MSTRG. 5901. 1 | 74   | 0. 39138 | 6. 804382324 | 1  |
| MSTRG. 5904. 1 | 343  | 0. 44321 | 9. 45123291  | 1  |
| MSTRG. 5904. 2 | 244  | 0. 41409 | 9. 553771973 | 1  |
| MSTRG. 5904. 4 | 343  | 0. 38122 | 9. 45123291  | 1  |
| MSTRG. 5907. 1 | 2720 | 0. 42061 | 5. 672058105 | 1  |
| MSTRG. 5908. 1 | 136  | 0. 32512 | 10. 4442749  | 1  |
| MSTRG. 5908. 2 | 117  | 0. 42749 | 11. 62445068 | 1  |
| MSTRG. 5907. 3 | 1849 | 0. 43447 | 5. 960510254 | 1  |
| MSTRG. 5907. 4 | 1876 | 0. 42061 | 5. 938415527 | 1  |
| MSTRG. 5909. 2 | 451  | 0. 39145 | 5. 081604004 | 1  |
| MSTRG. 5909. 3 | 436  | 0. 39145 | 6. 313171387 | 1  |
| MSTRG. 5909. 4 | 138  | 0. 29873 | 5. 308532715 | 1  |
| MSTRG. 5910. 1 | 246  | 0. 41567 | 5. 511291504 | 1  |
| MSTRG. 5915. 1 | 570  | 0. 40173 | 8. 004577637 | 1  |
| MSTRG. 5915. 4 | 145  | 0. 40082 | 6. 585388184 | 1  |
| MSTRG. 5915. 3 | 404  | 0. 40254 | 7. 437927246 | 1  |
| MSTRG. 5916. 1 | 250  | 0. 29367 | 8. 722717285 | 1  |
| MSTRG. 5917. 2 | 266  | 0. 46257 | 8. 90838623  | -1 |
| MSTRG. 5918. 1 | 18   | 0. 31588 | 6. 693054199 | 1  |
| MSTRG. 5919. 1 | 189  | 0. 3439  | 6. 100891113 | 1  |
| MSTRG. 5920. 1 | 172  | 0. 29772 | 10. 54083252 | 1  |
| MSTRG. 5924. 1 | 95   | 0. 29963 | 9. 125183105 | 1  |
| MSTRG. 5924. 6 | 503  | 0. 36968 | 4. 939147949 | 1  |
| MSTRG. 5924. 7 | 467  | 0. 48086 | 5. 175476074 | 1  |
| MSTRG. 5924. 8 | 448  | 0. 4825  | 5. 756774902 | 1  |
| MSTRG. 5921. 1 | 45   | 0. 38632 | 9. 497741699 | 1  |
| MSTRG. 5922. 3 | 86   | 0. 39389 | 4. 672546387 | 1  |
| MSTRG. 5922. 4 | 95   | 0. 27937 | 6. 528869629 | 1  |
| MSTRG. 5923. 1 | 127  | 0. 2921  | 8. 530944824 | 1  |
| MSTRG. 5925. 1 | 502  | 0. 39357 | 5. 383728027 | 1  |
| MSTRG. 5925. 2 | 502  | 0. 38889 | 5. 383728027 | 1  |
| MSTRG. 5925. 4 | 502  | 0. 34908 | 5. 383728027 | 1  |
| MSTRG. 5925. 3 | 369  | 0. 34544 | 5. 645080566 | 1  |
| MSTRG. 5925. 5 | 502  | 0. 3378  | 5. 383728027 | 1  |
| MSTRG. 5927. 1 | 570  | 0. 36813 | 9. 456115723 | 1  |
| MSTRG. 5927. 2 | 269  | 0. 32453 | 9. 328552246 | 1  |
| MSTRG. 5932. 1 | 180  | 0. 35381 | 9. 27935791  | 1  |
| MSTRG. 5934. 1 | 288  | 0. 35144 | 6. 858337402 | 1  |
| MSTRG. 5934. 3 | 436  | 0. 36697 | 6. 766906738 | 1  |
| MSTRG. 5934. 4 | 436  | 0. 37441 | 6. 766906738 | 1  |
| MSTRG. 5935. 2 | 326  | 0. 39628 | 9. 473693848 | 1  |

|                |     |          |              |    |
|----------------|-----|----------|--------------|----|
| MSTRG. 5936. 1 | 871 | 0. 46486 | 5. 640563965 | 1  |
| MSTRG. 5939. 1 | 32  | 0. 37628 | 10. 02215576 | 1  |
| MSTRG. 5940. 1 | 46  | 0. 3934  | 4. 415710449 | -1 |
| MSTRG. 5940. 2 | 45  | 0. 33141 | 9. 992980957 | 1  |
| MSTRG. 5939. 2 | 21  | 0. 40425 | 9. 489196777 | 1  |
| MSTRG. 5940. 4 | 34  | 0. 4002  | 4. 128234863 | -1 |
| MSTRG. 5939. 3 | 48  | 0. 37009 | 5. 144470215 | 1  |
| MSTRG. 5939. 4 | 54  | 0. 36496 | 10. 28631592 | 1  |
| MSTRG. 5940. 5 | 16  | 0. 45484 | 7. 999816895 | -1 |
| MSTRG. 5942. 1 | 48  | 0. 32016 | 5. 144470215 | 1  |
| MSTRG. 5944. 1 | 48  | 0. 32047 | 5. 144470215 | 1  |
| MSTRG. 5945. 1 | 48  | 0. 31868 | 4. 856506348 | 1  |
| MSTRG. 5946. 1 | 36  | 0. 2881  | 6. 484802246 | 1  |
| MSTRG. 5945. 2 | 48  | 0. 30938 | 4. 856506348 | 1  |
| MSTRG. 5949. 2 | 131 | 0. 34086 | 9. 738586426 | 1  |
| MSTRG. 5966. 1 | 94  | 0. 29355 | 10. 14202881 | 1  |
| MSTRG. 5965. 5 | 576 | 0. 30078 | 5. 401550293 | 1  |
| MSTRG. 5969. 1 | 64  | 0. 28301 | 6. 220031738 | 1  |
| MSTRG. 5965. 6 | 198 | 0. 40364 | 4. 83026123  | 1  |
| MSTRG. 5965. 7 | 105 | 0. 3272  | 10. 47601318 | 1  |
| MSTRG. 5965. 8 | 322 | 0. 29835 | 6. 132873535 | 1  |
| MSTRG. 5970. 1 | 41  | 0. 28719 | 10. 637146   | 1  |
| MSTRG. 5972. 1 | 94  | 0. 31177 | 8. 855895996 | 1  |
| MSTRG. 5951. 1 | 144 | 0. 37107 | 9. 058654785 | 1  |
| MSTRG. 5953. 1 | 124 | 0. 41997 | 7. 585510254 | 1  |
| MSTRG. 5955. 2 | 121 | 0. 35812 | 8. 965026855 | 1  |
| MSTRG. 5956. 3 | 403 | 0. 49063 | 5. 681945801 | 1  |
| MSTRG. 5956. 2 | 475 | 0. 35655 | 6. 192077637 | 1  |
| MSTRG. 5956. 4 | 88  | 0. 35072 | 9. 559509277 | 1  |
| MSTRG. 5958. 1 | 139 | 0. 29687 | 8. 195373535 | 1  |
| MSTRG. 5956. 6 | 369 | 0. 47143 | 5. 403381348 | 1  |
| MSTRG. 5956. 7 | 445 | 0. 4732  | 5. 431945801 | 1  |
| MSTRG. 5959. 1 | 74  | 0. 27433 | 9. 846252441 | 1  |
| MSTRG. 5960. 1 | 90  | 0. 30028 | 10. 12921143 | 1  |
| MSTRG. 5961. 1 | 68  | 0. 32072 | 8. 738952637 | 1  |
| MSTRG. 5962. 1 | 56  | 0. 31778 | 9. 299743652 | 1  |
| MSTRG. 5956. 8 | 218 | 0. 44566 | 6. 164489746 | 1  |
| MSTRG. 5985. 4 | 555 | 0. 33099 | 9. 344177246 | 1  |
| MSTRG. 5985. 7 | 485 | 0. 33202 | 9. 012390137 | -1 |
| MSTRG. 5985. 5 | 764 | 0. 33347 | 9. 468811035 | 1  |
| MSTRG. 5985. 8 | 208 | 0. 34554 | 9. 727478027 | 1  |
| MSTRG. 5986. 1 | 108 | 0. 32413 | 8. 981262207 | 1  |
| MSTRG. 5989. 1 | 75  | 0. 35693 | 9. 35736084  | 1  |
| MSTRG. 5990. 2 | 188 | 0. 41958 | 9. 420959473 | 1  |
| MSTRG. 5989. 4 | 153 | 0. 36969 | 4. 898742676 | 1  |
| MSTRG. 5984. 1 | 87  | 0. 33043 | 6. 001525879 | 1  |
| MSTRG. 5991. 1 | 365 | 0. 47167 | 4. 670959473 | 1  |
| MSTRG. 5991. 3 | 87  | 0. 37903 | 4. 071960449 | 1  |
| MSTRG. 5992. 1 | 609 | 0. 33865 | 6. 214782715 | 1  |
| MSTRG. 5994. 1 | 67  | 0. 33619 | 9. 34979248  | -1 |
| MSTRG. 5995. 1 | 116 | 0. 36273 | 6. 168395996 | -1 |
| MSTRG. 5997. 1 | 43  | 0. 33999 | 6. 691467285 | 1  |
| MSTRG. 5999. 1 | 115 | 0. 37018 | 6. 142028809 | 1  |
| MSTRG. 6004. 5 | 639 | 0. 41115 | 6. 680236816 | 1  |

|                 |      |          |              |    |
|-----------------|------|----------|--------------|----|
| MSTRG. 6004. 4  | 710  | 0. 41419 | 6. 292785645 | 1  |
| MSTRG. 6005. 1  | 111  | 0. 27517 | 9. 453186035 | 1  |
| MSTRG. 6006. 1  | 53   | 0. 2921  | 9. 397766113 | 1  |
| MSTRG. 6004. 7  | 572  | 0. 37825 | 6. 737609863 | 1  |
| MSTRG. 6007. 1  | 60   | 0. 29438 | 5. 58013916  | 1  |
| MSTRG. 6008. 1  | 117  | 0. 26785 | 6. 38494873  | 1  |
| MSTRG. 6008. 2  | 82   | 0. 46602 | 10. 53179932 | 1  |
| MSTRG. 6009. 3  | 1207 | 0. 41408 | 6. 075256348 | 1  |
| MSTRG. 6001. 2  | 27   | 0. 37319 | 9. 819763184 | 1  |
| MSTRG. 6010. 2  | 117  | 0. 31126 | 4. 771057129 | 1  |
| MSTRG. 6020. 4  | 958  | 0. 44289 | 6. 550720215 | 1  |
| MSTRG. 6029. 2  | 201  | 0. 40692 | 5. 179626465 | 1  |
| MSTRG. 6029. 3  | 241  | 0. 4102  | 5. 627746582 | 1  |
| MSTRG. 6029. 4  | 1106 | 0. 43485 | 9. 551818848 | 1  |
| MSTRG. 6030. 1  | 38   | 0. 35726 | 9. 184509277 | 1  |
| MSTRG. 6033. 2  | 157  | 0. 43633 | 8. 514709473 | 1  |
| MSTRG. 6035. 1  | 132  | 0. 28999 | 9. 268615723 | 1  |
| MSTRG. 6036. 2  | 391  | 0. 41522 | 10. 12371826 | 1  |
| MSTRG. 6036. 3  | 391  | 0. 41218 | 10. 12371826 | 1  |
| MSTRG. 6037. 1  | 105  | 0. 2985  | 9. 442932129 | 1  |
| MSTRG. 6040. 1  | 1170 | 0. 32846 | 8. 747497559 | 1  |
| MSTRG. 6040. 2  | 1197 | 0. 32846 | 8. 680480957 | 1  |
| MSTRG. 6040. 3  | 1170 | 0. 32522 | 8. 747497559 | 1  |
| MSTRG. 6040. 5  | 787  | 0. 49289 | 8. 953308105 | 1  |
| MSTRG. 6040. 4  | 1170 | 0. 49138 | 8. 838684082 | 1  |
| MSTRG. 6040. 6  | 563  | 0. 42874 | 9. 349304199 | -1 |
| MSTRG. 6040. 7  | 642  | 0. 45056 | 9. 277404785 | -1 |
| MSTRG. 6040. 8  | 698  | 0. 46562 | 9. 496154785 | -1 |
| MSTRG. 6040. 9  | 433  | 0. 46594 | 8. 969665527 | 1  |
| MSTRG. 6040. 10 | 386  | 0. 47209 | 8. 882141113 | 1  |
| MSTRG. 6040. 11 | 368  | 0. 46238 | 8. 91204834  | 1  |
| MSTRG. 6042. 1  | 466  | 0. 44553 | 6. 810852051 | 1  |
| MSTRG. 6043. 3  | 510  | 0. 35665 | 9. 175476074 | 1  |
| MSTRG. 6045. 2  | 738  | 0. 34787 | 8. 485168457 | 1  |
| MSTRG. 6050. 1  | 493  | 0. 33273 | 5. 040100098 | 1  |
| MSTRG. 6050. 3  | 416  | 0. 33121 | 5. 028137207 | 1  |
| MSTRG. 6050. 4  | 493  | 0. 35199 | 5. 040100098 | 1  |
| MSTRG. 6050. 7  | 306  | 0. 3927  | 8. 214904785 | 1  |
| MSTRG. 6056. 1  | 1022 | 0. 46679 | 9. 03704834  | 1  |
| MSTRG. 6058. 1  | 124  | 0. 30725 | 11. 66778564 | 1  |
| MSTRG. 6058. 2  | 105  | 0. 32046 | 9. 421325684 | 1  |
| MSTRG. 6060. 3  | 112  | 0. 28014 | 6. 254211426 | 1  |
| MSTRG. 6060. 2  | 108  | 0. 34787 | 6. 967834473 | 1  |
| MSTRG. 6061. 2  | 766  | 0. 32237 | 7. 269592285 | 1  |
| MSTRG. 6061. 4  | 690  | 0. 34547 | 9. 00177002  | 1  |
| MSTRG. 6061. 5  | 50   | 0. 3208  | 10. 82440186 | 1  |
| MSTRG. 6061. 6  | 757  | 0. 31852 | 8. 504943848 | 1  |
| MSTRG. 6061. 7  | 726  | 0. 38408 | 8. 27557373  | 1  |
| MSTRG. 6061. 10 | 697  | 0. 4495  | 9. 135681152 | -1 |
| MSTRG. 6061. 11 | 435  | 0. 40728 | 9. 262756348 | -1 |
| MSTRG. 6061. 12 | 686  | 0. 44085 | 8. 44354248  | 1  |
| MSTRG. 6061. 9  | 641  | 0. 4455  | 6. 611022949 | 1  |
| MSTRG. 6062. 1  | 116  | 0. 29512 | 9. 217346191 | 1  |
| MSTRG. 6063. 1  | 85   | 0. 37636 | 9. 303527832 | 1  |

|                 |      |          |              |    |
|-----------------|------|----------|--------------|----|
| MSTRG. 6055. 2  | 104  | 0. 38245 | 9. 220153809 | 1  |
| MSTRG. 6055. 3  | 104  | 0. 42568 | 9. 220153809 | 1  |
| MSTRG. 6065. 2  | 136  | 0. 38167 | 7. 624938965 | 1  |
| MSTRG. 6066. 1  | 1622 | 0. 41744 | 4. 452331543 | 1  |
| MSTRG. 6067. 2  | 153  | 0. 37921 | 5. 35369873  | 1  |
| MSTRG. 6068. 2  | 243  | 0. 47114 | 5. 390930176 | 1  |
| MSTRG. 6073. 1  | 151  | 0. 37679 | 6. 26361084  | 1  |
| MSTRG. 6074. 1  | 66   | 0. 38648 | 11. 45318604 | -1 |
| MSTRG. 6075. 1  | 65   | 0. 35622 | 4. 860900879 | 1  |
| MSTRG. 6076. 1  | 55   | 0. 46096 | 12. 36810303 | 1  |
| MSTRG. 6077. 1  | 14   | 0. 42778 | 7. 999816895 | 1  |
| MSTRG. 6077. 2  | 55   | 0. 49213 | 11. 77850342 | 1  |
| MSTRG. 6088. 1  | 214  | 0. 40933 | 6. 06463623  | 1  |
| MSTRG. 6088. 5  | 234  | 0. 44695 | 6. 139953613 | -1 |
| MSTRG. 6089. 2  | 399  | 0. 36735 | 7. 040588379 | 1  |
| MSTRG. 6089. 3  | 343  | 0. 36487 | 6. 804260254 | 1  |
| MSTRG. 6096. 1  | 41   | 0. 3693  | 6. 891540527 | -1 |
| MSTRG. 6100. 1  | 112  | 0. 28624 | 9. 16986084  | 1  |
| MSTRG. 6104. 1  | 62   | 0. 32446 | 11. 78668213 | 1  |
| MSTRG. 6105. 1  | 49   | 0. 36902 | 10. 637146   | 1  |
| MSTRG. 6112. 1  | 118  | 0. 3415  | 5. 558410645 | 1  |
| MSTRG. 6113. 1  | 83   | 0. 40285 | 6. 491149902 | 1  |
| MSTRG. 6121. 3  | 715  | 0. 29772 | 7. 162780762 | 1  |
| MSTRG. 6121. 5  | 595  | 0. 42865 | 5. 698547363 | 1  |
| MSTRG. 6121. 7  | 509  | 0. 29772 | 8. 757995605 | 1  |
| MSTRG. 6121. 9  | 748  | 0. 37422 | 6. 53326416  | 1  |
| MSTRG. 6121. 10 | 637  | 0. 368   | 5. 613708496 | 1  |
| MSTRG. 6119. 1  | 408  | 0. 33043 | 9. 824401855 | 1  |
| MSTRG. 6119. 3  | 408  | 0. 30957 | 9. 824401855 | 1  |
| MSTRG. 6124. 3  | 430  | 0. 39687 | 6. 26763916  | 1  |
| MSTRG. 6125. 2  | 582  | 0. 40913 | 7. 571350098 | 1  |
| MSTRG. 6125. 3  | 464  | 0. 38658 | 8. 394714355 | 1  |
| MSTRG. 6125. 4  | 453  | 0. 38091 | 8. 394714355 | 1  |
| MSTRG. 6130. 4  | 629  | 0. 38872 | 6. 217956543 | 1  |
| MSTRG. 6127. 1  | 30   | 0. 42446 | 7. 835266113 | 1  |
| MSTRG. 6133. 1  | 18   | 0. 3854  | 7. 81060791  | 1  |
| MSTRG. 6133. 2  | 18   | 0. 38746 | 7. 81060791  | 1  |
| MSTRG. 6134. 1  | 151  | 0. 37384 | 4. 885192871 | 1  |
| MSTRG. 6136. 1  | 56   | 0. 33693 | 6. 23614502  | -1 |
| MSTRG. 6136. 2  | 261  | 0. 37218 | 4. 912658691 | 1  |
| MSTRG. 6139. 6  | 559  | 0. 35842 | 10. 04156494 | 1  |
| MSTRG. 6140. 2  | 35   | 0. 36374 | 8. 532409668 | 1  |
| MSTRG. 6141. 2  | 553  | 0. 38963 | 11. 08428955 | 1  |
| MSTRG. 6143. 1  | 294  | 0. 43121 | 5. 432067871 | 1  |
| MSTRG. 6145. 3  | 297  | 0. 45374 | 7. 481628418 | 1  |
| MSTRG. 6149. 1  | 174  | 0. 44836 | 5. 106628418 | 1  |
| MSTRG. 6154. 3  | 247  | 0. 41031 | 9. 179382324 | 1  |
| MSTRG. 6163. 1  | 227  | 0. 3926  | 9. 797302246 | 1  |
| MSTRG. 6163. 2  | 227  | 0. 40856 | 9. 797302246 | 1  |
| MSTRG. 6163. 4  | 401  | 0. 36594 | 9. 671203613 | 1  |
| MSTRG. 6163. 5  | 422  | 0. 4003  | 9. 875549316 | 1  |
| MSTRG. 6161. 2  | 255  | 0. 34177 | 4. 740905762 | 1  |
| MSTRG. 6161. 3  | 426  | 0. 39211 | 6. 835388184 | 1  |
| MSTRG. 6167. 1  | 625  | 0. 45149 | 6. 797058105 | 1  |

|                 |      |          |              |    |
|-----------------|------|----------|--------------|----|
| MSTRG. 6167. 3  | 625  | 0. 45892 | 6. 797058105 | 1  |
| MSTRG. 6169. 2  | 470  | 0. 42896 | 9. 356384277 | 1  |
| MSTRG. 6170. 1  | 82   | 0. 30661 | 7. 826721191 | 1  |
| MSTRG. 6171. 1  | 58   | 0. 42313 | 9. 190612793 | 1  |
| MSTRG. 6171. 2  | 58   | 0. 39563 | 9. 415588379 | 1  |
| MSTRG. 6173. 2  | 79   | 0. 29022 | 5. 76348877  | 1  |
| MSTRG. 6173. 3  | 75   | 0. 35568 | 6. 053283691 | 1  |
| MSTRG. 6174. 7  | 326  | 0. 45141 | 6. 227111816 | 1  |
| MSTRG. 6174. 1  | 326  | 0. 46746 | 6. 227111816 | 1  |
| MSTRG. 6174. 6  | 326  | 0. 45721 | 6. 227111816 | 1  |
| MSTRG. 6174. 9  | 27   | 0. 35438 | 3. 998840332 | 1  |
| MSTRG. 6174. 10 | 27   | 0. 36786 | 3. 998840332 | 1  |
| MSTRG. 6186. 2  | 232  | 0. 35674 | 9. 00604248  | 1  |
| MSTRG. 6190. 2  | 4959 | 0. 42851 | 6. 077087402 | 1  |
| MSTRG. 6190. 1  | 4968 | 0. 42851 | 6. 093811035 | 1  |
| MSTRG. 6190. 10 | 4487 | 0. 44512 | 6. 227966309 | 1  |
| MSTRG. 6190. 11 | 4488 | 0. 44512 | 6. 227966309 | 1  |
| MSTRG. 6190. 15 | 4400 | 0. 43126 | 6. 21673584  | 1  |
| MSTRG. 6190. 12 | 4487 | 0. 44512 | 6. 227966309 | 1  |
| MSTRG. 6190. 5  | 4480 | 0. 44512 | 6. 208068848 | 1  |
| MSTRG. 6190. 14 | 4491 | 0. 43187 | 6. 288513184 | 1  |
| MSTRG. 6190. 9  | 4889 | 0. 44512 | 6. 099914551 | 1  |
| MSTRG. 6190. 6  | 4967 | 0. 44512 | 6. 093811035 | 1  |
| MSTRG. 6190. 4  | 4960 | 0. 44512 | 6. 077087402 | 1  |
| MSTRG. 6190. 8  | 4958 | 0. 44512 | 6. 077087402 | 1  |
| MSTRG. 6190. 17 | 465  | 0. 34787 | 6. 992126465 | 1  |
| MSTRG. 6192. 1  | 111  | 0. 27241 | 5. 471984863 | 1  |
| MSTRG. 6193. 1  | 43   | 0. 30578 | 10. 04425049 | 1  |
| MSTRG. 6179. 1  | 70   | 0. 28027 | 9. 644592285 | 1  |
| MSTRG. 6179. 2  | 94   | 0. 37915 | 10. 14007568 | 1  |
| MSTRG. 6180. 6  | 160  | 0. 30633 | 4. 871154785 | 1  |
| MSTRG. 6180. 7  | 141  | 0. 27844 | 5. 587097168 | 1  |
| MSTRG. 6180. 5  | 160  | 0. 30633 | 4. 657043457 | 1  |
| MSTRG. 6180. 2  | 418  | 0. 43372 | 5. 614929199 | 1  |
| MSTRG. 6180. 4  | 418  | 0. 44802 | 5. 614929199 | 1  |
| MSTRG. 6180. 8  | 282  | 0. 30837 | 7. 558776855 | 1  |
| MSTRG. 6181. 1  | 47   | 0. 29681 | 11. 64117432 | 1  |
| MSTRG. 6181. 2  | 56   | 0. 32234 | 6. 520690918 | 1  |
| MSTRG. 6180. 10 | 92   | 0. 38429 | 9. 45135498  | 1  |
| MSTRG. 6180. 11 | 92   | 0. 39859 | 9. 45135498  | 1  |
| MSTRG. 6180. 9  | 92   | 0. 38939 | 9. 45135498  | 1  |
| MSTRG. 6182. 1  | 158  | 0. 42677 | 6. 544372559 | 1  |
| MSTRG. 6184. 1  | 112  | 0. 32792 | 9. 82598877  | 1  |
| MSTRG. 6196. 1  | 27   | 0. 44131 | 8. 020324707 | -1 |
| MSTRG. 6201. 1  | 368  | 0. 42728 | 5. 916442871 | 1  |
| MSTRG. 6204. 2  | 737  | 0. 46447 | 8. 885437012 | 1  |
| MSTRG. 6204. 3  | 891  | 0. 45671 | 6. 69720459  | 1  |
| MSTRG. 6206. 1  | 26   | 0. 42564 | 8. 210510254 | 1  |
| MSTRG. 6212. 1  | 1157 | 0. 39433 | 6. 584899902 | 1  |
| MSTRG. 6212. 2  | 1158 | 0. 39433 | 6. 584899902 | 1  |
| MSTRG. 6212. 3  | 55   | 0. 3495  | 7. 85736084  | -1 |
| MSTRG. 6212. 8  | 476  | 0. 45558 | 10. 59527588 | 1  |
| MSTRG. 6220. 1  | 53   | 0. 40899 | 9. 431213379 | 1  |
| MSTRG. 6222. 3  | 356  | 0. 46606 | 8. 990905762 | 1  |

|                |      |          |              |    |
|----------------|------|----------|--------------|----|
| MSTRG. 6222. 4 | 209  | 0. 44887 | 7. 637268066 | 1  |
| MSTRG. 6223. 1 | 129  | 0. 29624 | 9. 166442871 | 1  |
| MSTRG. 6231. 1 | 466  | 0. 44054 | 9. 190612793 | 1  |
| MSTRG. 6232. 2 | 968  | 0. 43959 | 5. 688293457 | 1  |
| MSTRG. 6232. 4 | 1013 | 0. 44412 | 7. 98248291  | 1  |
| MSTRG. 6233. 1 | 84   | 0. 29373 | 9. 296325684 | 1  |
| MSTRG. 6233. 2 | 84   | 0. 29469 | 9. 296325684 | 1  |
| MSTRG. 6235. 5 | 259  | 0. 4506  | 4. 261169434 | 1  |
| MSTRG. 6235. 4 | 318  | 0. 39475 | 8. 999084473 | 1  |
| MSTRG. 6235. 6 | 259  | 0. 3185  | 4. 261169434 | 1  |
| MSTRG. 6235. 7 | 142  | 0. 29736 | 8. 990539551 | 1  |
| MSTRG. 6235. 8 | 259  | 0. 31752 | 4. 261169434 | 1  |
| MSTRG. 6235. 9 | 318  | 0. 30989 | 8. 999084473 | 1  |
| MSTRG. 6238. 2 | 895  | 0. 44756 | 6. 255187988 | 1  |
| MSTRG. 6240. 1 | 209  | 0. 35393 | 10. 06060791 | 1  |
| MSTRG. 6238. 3 | 76   | 0. 27413 | 11. 94329834 | -1 |
| MSTRG. 6242. 1 | 88   | 0. 3724  | 9. 776550293 | -1 |
| MSTRG. 6237. 2 | 75   | 0. 2845  | 5. 623840332 | 1  |
| MSTRG. 6237. 3 | 442  | 0. 4321  | 6. 857116699 | 1  |
| MSTRG. 6237. 4 | 773  | 0. 46379 | 7. 480041504 | 1  |
| MSTRG. 6237. 5 | 1140 | 0. 44999 | 7. 18560791  | 1  |
| MSTRG. 6251. 1 | 843  | 0. 42249 | 7. 309875488 | 1  |
| MSTRG. 6251. 2 | 522  | 0. 35597 | 5. 418273926 | 1  |
| MSTRG. 6251. 3 | 825  | 0. 35997 | 7. 049499512 | 1  |
| MSTRG. 6251. 4 | 721  | 0. 3174  | 6. 656433105 | 1  |
| MSTRG. 6251. 5 | 417  | 0. 28119 | 9. 372375488 | 1  |
| MSTRG. 6251. 7 | 417  | 0. 36306 | 9. 372375488 | 1  |
| MSTRG. 6251. 8 | 136  | 0. 31477 | 10. 42877197 | 1  |
| MSTRG. 6252. 1 | 334  | 0. 35052 | 9. 082092285 | 1  |
| MSTRG. 6253. 1 | 1066 | 0. 42464 | 7. 085754395 | 1  |
| MSTRG. 6253. 2 | 1057 | 0. 42826 | 7. 087341309 | 1  |
| MSTRG. 6253. 3 | 1114 | 0. 41228 | 6. 831604004 | 1  |
| MSTRG. 6253. 5 | 1074 | 0. 447   | 7. 232116699 | 1  |
| MSTRG. 6248. 1 | 55   | 0. 4424  | 4. 352355957 | 1  |
| MSTRG. 6267. 3 | 227  | 0. 33481 | 10. 02825928 | 1  |
| MSTRG. 6271. 1 | 1988 | 0. 46866 | 8. 468322754 | 1  |
| MSTRG. 6271. 3 | 1570 | 0. 46455 | 6. 647155762 | 1  |
| MSTRG. 6272. 1 | 219  | 0. 29224 | 8. 944274902 | 1  |
| MSTRG. 6273. 2 | 279  | 0. 37366 | 8. 294372559 | 1  |
| MSTRG. 6273. 3 | 230  | 0. 35961 | 9. 560241699 | 1  |
| MSTRG. 6274. 2 | 124  | 0. 41378 | 5. 432922363 | 1  |
| MSTRG. 6285. 1 | 69   | 0. 34696 | 10. 42608643 | 1  |
| MSTRG. 6288. 1 | 71   | 0. 47806 | 9. 588806152 | 1  |
| MSTRG. 6312. 1 | 370  | 0. 29367 | 9. 062316895 | 1  |
| MSTRG. 6312. 2 | 571  | 0. 39359 | 8. 081604004 | 1  |
| MSTRG. 6314. 1 | 183  | 0. 3562  | 8. 526794434 | 1  |
| MSTRG. 6312. 8 | 272  | 0. 31852 | 11. 82220459 | 1  |
| MSTRG. 6315. 1 | 133  | 0. 30078 | 6. 202697754 | 1  |
| MSTRG. 6316. 1 | 170  | 0. 27289 | 11. 06658936 | 1  |
| MSTRG. 6314. 2 | 183  | 0. 28982 | 8. 526794434 | 1  |
| MSTRG. 6314. 3 | 107  | 0. 27994 | 5. 120056152 | 1  |
| MSTRG. 6314. 4 | 107  | 0. 28642 | 5. 120056152 | 1  |
| MSTRG. 6317. 1 | 101  | 0. 29366 | 8. 880310059 | 1  |
| MSTRG. 6316. 2 | 201  | 0. 2921  | 10. 46990967 | 1  |

|                |      |          |              |   |
|----------------|------|----------|--------------|---|
| MSTRG. 6318. 1 | 81   | 0. 29374 | 6. 225769043 | 1 |
| MSTRG. 6316. 3 | 93   | 0. 2921  | 9. 738586426 | 1 |
| MSTRG. 6316. 4 | 44   | 0. 36754 | 9. 746398926 | 1 |
| MSTRG. 6316. 5 | 176  | 0. 2831  | 10. 91204834 | 1 |
| MSTRG. 6316. 6 | 151  | 0. 2831  | 7. 06842041  | 1 |
| MSTRG. 6319. 1 | 58   | 0. 40978 | 6. 813293457 | 1 |
| MSTRG. 6319. 2 | 33   | 0. 45806 | 6. 693664551 | 1 |
| MSTRG. 6319. 3 | 58   | 0. 41942 | 6. 813293457 | 1 |
| MSTRG. 6320. 1 | 45   | 0. 30749 | 7. 774475098 | 1 |
| MSTRG. 6323. 2 | 114  | 0. 31035 | 5. 676818848 | 1 |
| MSTRG. 6308. 4 | 187  | 0. 29022 | 5. 885681152 | 1 |
| MSTRG. 6327. 1 | 889  | 0. 46474 | 6. 518127441 | 1 |
| MSTRG. 6328. 1 | 53   | 0. 40159 | 6. 473449707 | 1 |
| MSTRG. 6332. 2 | 266  | 0. 45353 | 5. 659606934 | 1 |
| MSTRG. 6332. 3 | 302  | 0. 40048 | 6. 22052002  | 1 |
| MSTRG. 6333. 1 | 98   | 0. 41705 | 10. 35186768 | 1 |
| MSTRG. 6334. 2 | 193  | 0. 3311  | 8. 95098877  | 1 |
| MSTRG. 6348. 1 | 45   | 0. 34101 | 10. 637146   | 1 |
| MSTRG. 6348. 2 | 109  | 0. 29676 | 7. 631164551 | 1 |
| MSTRG. 6349. 2 | 1708 | 0. 42215 | 7. 040710449 | 1 |
| MSTRG. 6349. 1 | 1754 | 0. 41361 | 6. 689147949 | 1 |
| MSTRG. 6349. 3 | 1760 | 0. 41361 | 6. 739807129 | 1 |
| MSTRG. 6349. 4 | 1746 | 0. 41361 | 6. 624572754 | 1 |
| MSTRG. 6349. 5 | 1715 | 0. 4447  | 7. 155334473 | 1 |
| MSTRG. 6349. 6 | 1730 | 0. 42139 | 7. 453063965 | 1 |
| MSTRG. 6349. 7 | 1708 | 0. 42139 | 7. 041809082 | 1 |
| MSTRG. 6349. 8 | 1742 | 0. 39821 | 6. 944519043 | 1 |
| MSTRG. 6350. 1 | 33   | 0. 32345 | 4. 493103027 | 1 |
| MSTRG. 6351. 1 | 79   | 0. 28411 | 6. 395080566 | 1 |
| MSTRG. 6351. 3 | 353  | 0. 30804 | 5. 357971191 | 1 |
| MSTRG. 6355. 5 | 57   | 0. 25541 | 6. 942932129 | 1 |
| MSTRG. 6355. 4 | 771  | 0. 37862 | 5. 539733887 | 1 |
| MSTRG. 6356. 1 | 72   | 0. 29583 | 10. 51885986 | 1 |
| MSTRG. 6357. 1 | 79   | 0. 37546 | 9. 492980957 | 1 |
| MSTRG. 6355. 6 | 53   | 0. 29374 | 9. 014465332 | 1 |
| MSTRG. 6358. 1 | 150  | 0. 29343 | 9. 136901855 | 1 |
| MSTRG. 6359. 1 | 105  | 0. 31852 | 9. 855529785 | 1 |
| MSTRG. 6359. 2 | 105  | 0. 31851 | 6. 24822998  | 1 |
| MSTRG. 6355. 7 | 101  | 0. 35808 | 9. 427429199 | 1 |
| MSTRG. 6360. 1 | 40   | 0. 34743 | 5. 303771973 | 1 |
| MSTRG. 6363. 1 | 1039 | 0. 43997 | 5. 121276855 | 1 |
| MSTRG. 6364. 1 | 232  | 0. 37539 | 8. 174621582 | 1 |
| MSTRG. 6384. 1 | 97   | 0. 31753 | 9. 505065918 | 1 |
| MSTRG. 6385. 1 | 58   | 0. 26785 | 7. 749450684 | 1 |
| MSTRG. 6386. 1 | 125  | 0. 32709 | 10. 21307373 | 1 |
| MSTRG. 6387. 1 | 78   | 0. 29387 | 7. 606750488 | 1 |
| MSTRG. 6388. 1 | 62   | 0. 309   | 6. 810852051 | 1 |
| MSTRG. 6389. 1 | 190  | 0. 30595 | 10. 11834717 | 1 |
| MSTRG. 6389. 2 | 179  | 0. 35469 | 9. 445373535 | 1 |
| MSTRG. 6389. 3 | 172  | 0. 44874 | 8. 512023926 | 1 |
| MSTRG. 6383. 2 | 739  | 0. 36893 | 8. 965270996 | 1 |
| MSTRG. 6383. 3 | 446  | 0. 381   | 9. 432800293 | 1 |
| MSTRG. 6383. 4 | 80   | 0. 36467 | 6. 787780762 | 1 |
| MSTRG. 6379. 1 | 37   | 0. 35339 | 4. 868225098 | 1 |



|                 |      |          |              |   |
|-----------------|------|----------|--------------|---|
| MSTRG. 6391. 1  | 292  | 0. 3685  | 9. 239807129 | 1 |
| MSTRG. 6404. 2  | 1632 | 0. 48747 | 5. 714660645 | 1 |
| MSTRG. 6404. 3  | 1667 | 0. 45318 | 5. 724304199 | 1 |
| MSTRG. 6433. 11 | 469  | 0. 41802 | 8. 207214355 | 1 |
| MSTRG. 6433. 12 | 485  | 0. 45536 | 8. 439147949 | 1 |
| MSTRG. 6433. 15 | 446  | 0. 42174 | 8. 227233887 | 1 |
| MSTRG. 6433. 3  | 415  | 0. 45569 | 8. 38861084  | 1 |
| MSTRG. 6433. 4  | 422  | 0. 40124 | 8. 289123535 | 1 |
| MSTRG. 6433. 5  | 461  | 0. 43486 | 8. 50201416  | 1 |
| MSTRG. 6433. 6  | 445  | 0. 40157 | 8. 265808105 | 1 |
| MSTRG. 6433. 8  | 438  | 0. 40124 | 8. 412414551 | 1 |
| MSTRG. 6433. 13 | 461  | 0. 39752 | 8. 38861084  | 1 |
| MSTRG. 6433. 10 | 399  | 0. 41263 | 8. 222351074 | 1 |
| MSTRG. 6433. 14 | 431  | 0. 43486 | 8. 627868652 | 1 |
| MSTRG. 6433. 16 | 392  | 0. 40113 | 8. 419616699 | 1 |
| MSTRG. 6433. 7  | 477  | 0. 39473 | 8. 583312988 | 1 |
| MSTRG. 6433. 9  | 376  | 0. 41728 | 8. 252502441 | 1 |
| MSTRG. 6435. 2  | 2762 | 0. 3992  | 5. 633483887 | 1 |
| MSTRG. 6436. 2  | 373  | 0. 36056 | 6. 97467041  | 1 |
| MSTRG. 6430. 2  | 246  | 0. 29059 | 5. 067321777 | 1 |
| MSTRG. 6442. 1  | 73   | 0. 32642 | 4. 247253418 | 1 |
| MSTRG. 6454. 2  | 96   | 0. 31851 | 4. 575256348 | 1 |
| MSTRG. 6456. 1  | 67   | 0. 30084 | 6. 699157715 | 1 |
| MSTRG. 6456. 2  | 64   | 0. 27674 | 6. 528137207 | 1 |
| MSTRG. 6457. 4  | 65   | 0. 34008 | 9. 23614502  | 1 |
| MSTRG. 6457. 2  | 65   | 0. 34008 | 9. 23614502  | 1 |
| MSTRG. 6457. 3  | 65   | 0. 32022 | 9. 839294434 | 1 |
| MSTRG. 6457. 5  | 37   | 0. 31138 | 5. 477844238 | 1 |
| MSTRG. 6464. 3  | 149  | 0. 42399 | 6. 843322754 | 1 |
| MSTRG. 6478. 1  | 700  | 0. 43089 | 6. 079650879 | 1 |
| MSTRG. 6497. 2  | 396  | 0. 41003 | 5. 403991699 | 1 |
| MSTRG. 6497. 3  | 430  | 0. 41625 | 5. 299743652 | 1 |
| MSTRG. 6497. 4  | 1433 | 0. 42228 | 6. 827453613 | 1 |
| MSTRG. 6497. 5  | 1433 | 0. 4248  | 6. 827453613 | 1 |
| MSTRG. 6497. 6  | 1434 | 0. 44688 | 6. 827453613 | 1 |
| MSTRG. 6497. 7  | 899  | 0. 3556  | 6. 215148926 | 1 |
| MSTRG. 6497. 9  | 92   | 0. 36062 | 10. 2366333  | 1 |
| MSTRG. 6497. 10 | 88   | 0. 28982 | 6. 792175293 | 1 |
| MSTRG. 6497. 11 | 899  | 0. 39276 | 6. 215148926 | 1 |
| MSTRG. 6501. 1  | 820  | 0. 47294 | 5. 106994629 | 1 |
| MSTRG. 6501. 2  | 627  | 0. 46326 | 5. 215881348 | 1 |
| MSTRG. 6501. 3  | 627  | 0. 4814  | 5. 215881348 | 1 |
| MSTRG. 6501. 4  | 785  | 0. 47581 | 5. 028015137 | 1 |
| MSTRG. 6501. 5  | 627  | 0. 46572 | 5. 215881348 | 1 |
| MSTRG. 6501. 6  | 116  | 0. 32469 | 9. 373962402 | 1 |
| MSTRG. 6501. 7  | 270  | 0. 48337 | 4. 425720215 | 1 |
| MSTRG. 6501. 8  | 106  | 0. 40392 | 4. 785461426 | 1 |
| MSTRG. 6502. 4  | 795  | 0. 43394 | 9. 25958252  | 1 |
| MSTRG. 6503. 1  | 477  | 0. 49759 | 5. 640441895 | 1 |
| MSTRG. 6487. 2  | 709  | 0. 40488 | 8. 016296387 | 1 |
| MSTRG. 6487. 1  | 709  | 0. 42413 | 8. 016296387 | 1 |
| MSTRG. 6487. 3  | 709  | 0. 42293 | 8. 016296387 | 1 |
| MSTRG. 6489. 1  | 37   | 0. 35821 | 9. 688293457 | 1 |
| MSTRG. 6494. 1  | 66   | 0. 36156 | 9. 183288574 | 1 |

|                 |      |          |              |    |
|-----------------|------|----------|--------------|----|
| MSTRG. 6496. 2  | 167  | 0. 36224 | 6. 143737793 | 1  |
| MSTRG. 6505. 2  | 125  | 0. 43197 | 5. 237487793 | 1  |
| MSTRG. 6507. 1  | 347  | 0. 377   | 10. 07452393 | 1  |
| MSTRG. 6507. 2  | 332  | 0. 37462 | 9. 99005127  | 1  |
| MSTRG. 6508. 2  | 158  | 0. 33022 | 6. 024230957 | 1  |
| MSTRG. 6513. 1  | 231  | 0. 36832 | 9. 467956543 | 1  |
| MSTRG. 6513. 2  | 153  | 0. 37116 | 9. 728210449 | 1  |
| MSTRG. 6515. 1  | 29   | 0. 44261 | 11. 39801025 | 1  |
| MSTRG. 6520. 1  | 163  | 0. 39655 | 7. 505310059 | 1  |
| MSTRG. 6522. 3  | 417  | 0. 44657 | 6. 270935059 | 1  |
| MSTRG. 6522. 4  | 417  | 0. 45317 | 6. 270935059 | 1  |
| MSTRG. 6530. 1  | 362  | 0. 39004 | 6. 330505371 | 1  |
| MSTRG. 6530. 2  | 362  | 0. 40632 | 6. 330505371 | 1  |
| MSTRG. 6530. 7  | 353  | 0. 45994 | 6. 603942871 | 1  |
| MSTRG. 6530. 11 | 334  | 0. 47414 | 8. 171691895 | 1  |
| MSTRG. 6530. 13 | 353  | 0. 41959 | 6. 603942871 | 1  |
| MSTRG. 6530. 12 | 353  | 0. 41278 | 6. 603942871 | 1  |
| MSTRG. 6530. 14 | 439  | 0. 44977 | 8. 695983887 | 1  |
| MSTRG. 6530. 15 | 141  | 0. 35093 | 9. 596496582 | 1  |
| MSTRG. 6524. 1  | 482  | 0. 34584 | 5. 678405762 | 1  |
| MSTRG. 6524. 2  | 738  | 0. 28096 | 8. 288391113 | 1  |
| MSTRG. 6524. 3  | 786  | 0. 28096 | 6. 940002441 | 1  |
| MSTRG. 6524. 6  | 779  | 0. 43264 | 7. 610778809 | 1  |
| MSTRG. 6524. 7  | 842  | 0. 41856 | 7. 580505371 | 1  |
| MSTRG. 6524. 8  | 779  | 0. 44773 | 7. 610778809 | 1  |
| MSTRG. 6526. 1  | 421  | 0. 33582 | 8. 855285645 | -1 |
| MSTRG. 6527. 2  | 218  | 0. 4523  | 5. 094055176 | 1  |
| MSTRG. 6527. 3  | 218  | 0. 44988 | 5. 094055176 | 1  |
| MSTRG. 6538. 3  | 512  | 0. 44078 | 6. 379821777 | 1  |
| MSTRG. 6544. 1  | 1488 | 0. 40862 | 8. 735778809 | 1  |
| MSTRG. 6544. 3  | 1409 | 0. 40862 | 8. 661804199 | 1  |
| MSTRG. 6540. 2  | 200  | 0. 36018 | 9. 547058105 | 1  |
| MSTRG. 6546. 1  | 351  | 0. 44602 | 5. 216003418 | 1  |
| MSTRG. 6550. 2  | 238  | 0. 44986 | 5. 320739746 | 1  |
| MSTRG. 6550. 3  | 238  | 0. 43298 | 5. 320739746 | 1  |
| MSTRG. 6550. 5  | 238  | 0. 44986 | 5. 320739746 | 1  |
| MSTRG. 6550. 6  | 238  | 0. 45906 | 5. 320739746 | 1  |
| MSTRG. 6551. 1  | 138  | 0. 32345 | 9. 069030762 | 1  |
| MSTRG. 6551. 2  | 110  | 0. 31168 | 6. 713195801 | 1  |
| MSTRG. 6551. 3  | 142  | 0. 3208  | 6. 150085449 | 1  |
| MSTRG. 6554. 1  | 598  | 0. 42055 | 6. 821228027 | 1  |
| MSTRG. 6555. 1  | 83   | 0. 45509 | 9. 183532715 | 1  |
| MSTRG. 6562. 1  | 1939 | 0. 4367  | 5. 774963379 | 1  |
| MSTRG. 6562. 3  | 239  | 0. 3281  | 8. 691345215 | 1  |
| MSTRG. 6568. 1  | 209  | 0. 38068 | 10. 3303833  | 1  |
| MSTRG. 6567. 6  | 108  | 0. 36869 | 12. 00750732 | 1  |
| MSTRG. 6564. 2  | 97   | 0. 46228 | 4. 206970215 | 1  |
| MSTRG. 6564. 3  | 106  | 0. 34849 | 7. 773742676 | 1  |
| MSTRG. 6577. 3  | 403  | 0. 37169 | 4. 72064209  | 1  |
| MSTRG. 6577. 2  | 543  | 0. 37151 | 4. 699645996 | 1  |
| MSTRG. 6582. 3  | 562  | 0. 45976 | 5. 510437012 | 1  |
| MSTRG. 6582. 2  | 562  | 0. 4374  | 5. 510437012 | 1  |
| MSTRG. 6582. 1  | 569  | 0. 46479 | 5. 392150879 | 1  |
| MSTRG. 6582. 4  | 569  | 0. 44277 | 5. 392150879 | 1  |

|                 |      |          |              |    |
|-----------------|------|----------|--------------|----|
| MSTRG. 6585. 1  | 417  | 0. 40978 | 9. 50579834  | 1  |
| MSTRG. 6587. 1  | 147  | 0. 33015 | 11. 22979736 | 1  |
| MSTRG. 6589. 2  | 116  | 0. 32204 | 8. 164001465 | 1  |
| MSTRG. 6591. 2  | 677  | 0. 44975 | 6. 218200684 | 1  |
| MSTRG. 6591. 3  | 679  | 0. 47016 | 6. 218200684 | 1  |
| MSTRG. 6592. 1  | 2641 | 0. 45172 | 8. 757263184 | 1  |
| MSTRG. 6592. 2  | 2641 | 0. 46158 | 8. 789978027 | 1  |
| MSTRG. 6594. 2  | 600  | 0. 40522 | 6. 09954834  | 1  |
| MSTRG. 6594. 3  | 760  | 0. 42788 | 7. 577453613 | 1  |
| MSTRG. 6598. 1  | 42   | 0. 27937 | 7. 804504395 | 1  |
| MSTRG. 6601. 4  | 57   | 0. 40668 | 9. 80255127  | 1  |
| MSTRG. 6605. 1  | 317  | 0. 39875 | 5. 00592041  | 1  |
| MSTRG. 6606. 2  | 175  | 0. 30285 | 9. 452453613 | 1  |
| MSTRG. 6614. 1  | 85   | 0. 35306 | 8. 313415527 | 1  |
| MSTRG. 6614. 2  | 139  | 0. 31483 | 5. 641418457 | 1  |
| MSTRG. 6612. 3  | 766  | 0. 41648 | 8. 57611084  | 1  |
| MSTRG. 6624. 2  | 449  | 0. 45737 | 4. 926574707 | 1  |
| MSTRG. 6624. 3  | 414  | 0. 44001 | 4. 939880371 | 1  |
| MSTRG. 6624. 4  | 412  | 0. 43374 | 4. 986999512 | -1 |
| MSTRG. 6624. 5  | 445  | 0. 45871 | 5. 01348877  | -1 |
| MSTRG. 6624. 7  | 405  | 0. 42354 | 5. 225769043 | -1 |
| MSTRG. 6624. 6  | 405  | 0. 45704 | 5. 225769043 | -1 |
| MSTRG. 6624. 8  | 375  | 0. 44801 | 5. 899230957 | 1  |
| MSTRG. 6624. 9  | 256  | 0. 42272 | 5. 399353027 | 1  |
| MSTRG. 6624. 10 | 410  | 0. 45438 | 5. 078552246 | -1 |
| MSTRG. 6624. 11 | 409  | 0. 43646 | 5. 119445801 | -1 |
| MSTRG. 6626. 1  | 8    | 0. 33761 | 8. 521057129 | 1  |
| MSTRG. 6627. 1  | 456  | 0. 4166  | 5. 144104004 | 1  |
| MSTRG. 6627. 2  | 451  | 0. 45686 | 4. 942810059 | 1  |
| MSTRG. 6627. 3  | 477  | 0. 44636 | 4. 750305176 | 1  |
| MSTRG. 6627. 4  | 451  | 0. 46456 | 4. 942810059 | 1  |
| MSTRG. 6627. 5  | 483  | 0. 44357 | 4. 678161621 | 1  |
| MSTRG. 6627. 6  | 479  | 0. 44357 | 4. 731018066 | 1  |
| MSTRG. 6627. 7  | 451  | 0. 44661 | 4. 942810059 | 1  |
| MSTRG. 6622. 2  | 489  | 0. 42711 | 8. 204406738 | 1  |
| MSTRG. 6622. 3  | 62   | 0. 37408 | 6. 257629395 | 1  |
| MSTRG. 6622. 4  | 489  | 0. 43822 | 8. 204406738 | 1  |
| MSTRG. 6633. 1  | 5621 | 0. 45787 | 5. 492980957 | 1  |
| MSTRG. 6633. 2  | 5609 | 0. 45787 | 5. 492980957 | 1  |
| MSTRG. 6633. 7  | 3831 | 0. 46097 | 5. 269104004 | -1 |
| MSTRG. 6633. 5  | 5600 | 0. 45622 | 5. 492980957 | 1  |
| MSTRG. 6634. 2  | 244  | 0. 37351 | 6. 714660645 | 1  |
| MSTRG. 6629. 2  | 181  | 0. 44592 | 6. 84173584  | 1  |
| MSTRG. 6636. 3  | 308  | 0. 38425 | 6. 272888184 | 1  |
| MSTRG. 6636. 4  | 308  | 0. 42469 | 6. 272888184 | 1  |
| MSTRG. 6636. 5  | 308  | 0. 38425 | 6. 272888184 | 1  |
| MSTRG. 6636. 6  | 308  | 0. 38048 | 6. 272888184 | 1  |
| MSTRG. 6638. 2  | 328  | 0. 44247 | 5. 356506348 | 1  |
| MSTRG. 6639. 2  | 112  | 0. 33969 | 9. 995788574 | 1  |
| MSTRG. 6639. 3  | 65   | 0. 35275 | 9. 295959473 | 1  |
| MSTRG. 6640. 3  | 551  | 0. 45829 | 8. 926330566 | 1  |
| MSTRG. 6640. 4  | 551  | 0. 31292 | 8. 926330566 | 1  |
| MSTRG. 6644. 4  | 297  | 0. 37519 | 6. 512145996 | 1  |
| MSTRG. 6644. 6  | 263  | 0. 35266 | 8. 702209473 | 1  |

|                |      |          |              |    |
|----------------|------|----------|--------------|----|
| MSTRG. 6644. 7 | 297  | 0. 37781 | 6. 512145996 | 1  |
| MSTRG. 6644. 8 | 257  | 0. 33097 | 8. 743225098 | 1  |
| MSTRG. 6652. 1 | 272  | 0. 35119 | 11. 31658936 | 1  |
| MSTRG. 6660. 1 | 288  | 0. 44174 | 5. 711853027 | 1  |
| MSTRG. 6660. 2 | 288  | 0. 4005  | 5. 711853027 | 1  |
| MSTRG. 6660. 5 | 288  | 0. 33719 | 5. 711853027 | 1  |
| MSTRG. 6661. 5 | 850  | 0. 44721 | 8. 437927246 | 1  |
| MSTRG. 6661. 7 | 850  | 0. 44517 | 8. 437927246 | 1  |
| MSTRG. 6661. 3 | 850  | 0. 45248 | 8. 437927246 | 1  |
| MSTRG. 6662. 6 | 645  | 0. 34731 | 8. 180358887 | 1  |
| MSTRG. 6662. 7 | 543  | 0. 34471 | 7. 975036621 | 1  |
| MSTRG. 6657. 1 | 1146 | 0. 43763 | 7. 524719238 | 1  |
| MSTRG. 6670. 1 | 67   | 0. 27607 | 10. 13275146 | 1  |
| MSTRG. 6681. 1 | 162  | 0. 29607 | 9. 917541504 | 1  |
| MSTRG. 6682. 1 | 148  | 0. 28683 | 7. 070373535 | 1  |
| MSTRG. 6685. 1 | 437  | 0. 43306 | 8. 900817871 | 1  |
| MSTRG. 6678. 2 | 36   | 0. 3936  | 4. 950012207 | 1  |
| MSTRG. 6698. 1 | 67   | 0. 48377 | 8. 031921387 | -1 |
| MSTRG. 6705. 1 | 336  | 0. 2895  | 5. 098693848 | 1  |
| MSTRG. 6708. 1 | 99   | 0. 31035 | 10. 22515869 | 1  |
| MSTRG. 6709. 1 | 103  | 0. 31642 | 5. 817077637 | 1  |
| MSTRG. 6710. 1 | 105  | 0. 31977 | 8. 843688965 | 1  |
| MSTRG. 6707. 3 | 1322 | 0. 42656 | 8. 90814209  | 1  |
| MSTRG. 6707. 4 | 1306 | 0. 43017 | 8. 945983887 | 1  |
| MSTRG. 6711. 1 | 160  | 0. 31645 | 10. 95001221 | -1 |
| MSTRG. 6713. 1 | 19   | 0. 35793 | 11. 70025635 | 1  |
| MSTRG. 6714. 1 | 170  | 0. 30644 | 9. 738342285 | 1  |
| MSTRG. 6714. 2 | 180  | 0. 31225 | 10. 29315186 | 1  |
| MSTRG. 6714. 3 | 109  | 0. 26785 | 10. 18304443 | 1  |
| MSTRG. 6714. 4 | 116  | 0. 27622 | 10. 57415771 | 1  |
| MSTRG. 6714. 5 | 101  | 0. 35493 | 9. 733703613 | 1  |
| MSTRG. 6715. 1 | 125  | 0. 30788 | 6. 577575684 | 1  |
| MSTRG. 6694. 1 | 114  | 0. 29666 | 6. 282897949 | 1  |
| MSTRG. 6694. 2 | 116  | 0. 30816 | 5. 998962402 | 1  |
| MSTRG. 6695. 1 | 85   | 0. 29234 | 9. 778747559 | 1  |
| MSTRG. 6694. 3 | 128  | 0. 28683 | 6. 731506348 | 1  |
| MSTRG. 6694. 4 | 48   | 0. 3084  | 6. 664123535 | 1  |
| MSTRG. 6726. 2 | 252  | 0. 41888 | 6. 521789551 | 1  |
| MSTRG. 6739. 2 | 79   | 0. 29772 | 8. 209289551 | 1  |
| MSTRG. 6739. 4 | 35   | 0. 33323 | 6. 52130127  | 1  |
| MSTRG. 6740. 2 | 76   | 0. 27289 | 9. 777038574 | 1  |
| MSTRG. 6741. 3 | 317  | 0. 47579 | 6. 049133301 | 1  |
| MSTRG. 6741. 4 | 347  | 0. 47233 | 7. 210510254 | 1  |
| MSTRG. 6741. 5 | 306  | 0. 48947 | 8. 737121582 | 1  |
| MSTRG. 6744. 1 | 64   | 0. 4246  | 4. 721740723 | 1  |
| MSTRG. 6744. 2 | 47   | 0. 32844 | 7. 69354248  | 1  |
| MSTRG. 6748. 3 | 838  | 0. 43832 | 5. 25994873  | -1 |
| MSTRG. 6750. 2 | 387  | 0. 39215 | 8. 890808105 | 1  |
| MSTRG. 6756. 1 | 193  | 0. 28498 | 5. 413635254 | 1  |
| MSTRG. 6757. 1 | 272  | 0. 34457 | 9. 218200684 | 1  |
| MSTRG. 6760. 1 | 78   | 0. 3272  | 5. 350036621 | 1  |
| MSTRG. 6762. 1 | 108  | 0. 2921  | 9. 605773926 | 1  |
| MSTRG. 6763. 1 | 93   | 0. 35875 | 7. 979064941 | 1  |
| MSTRG. 6761. 4 | 471  | 0. 36159 | 7. 964904785 | 1  |

|                 |      |          |              |   |
|-----------------|------|----------|--------------|---|
| MSTRG. 6761. 5  | 453  | 0. 35114 | 8. 219055176 | 1 |
| MSTRG. 6761. 6  | 470  | 0. 386   | 7. 964904785 | 1 |
| MSTRG. 6764. 1  | 66   | 0. 41178 | 10. 09002686 | 1 |
| MSTRG. 6774. 1  | 89   | 0. 27234 | 9. 100280762 | 1 |
| MSTRG. 6775. 1  | 168  | 0. 2765  | 10. 10565186 | 1 |
| MSTRG. 6776. 1  | 174  | 0. 33359 | 9. 563903809 | 1 |
| MSTRG. 6777. 1  | 119  | 0. 33706 | 6. 051330566 | 1 |
| MSTRG. 6776. 2  | 132  | 0. 3513  | 8. 209655762 | 1 |
| MSTRG. 6777. 2  | 77   | 0. 32515 | 7. 858947754 | 1 |
| MSTRG. 6778. 1  | 93   | 0. 30276 | 9. 235656738 | 1 |
| MSTRG. 6777. 3  | 119  | 0. 31027 | 6. 051330566 | 1 |
| MSTRG. 6777. 5  | 98   | 0. 28982 | 5. 083190918 | 1 |
| MSTRG. 6780. 1  | 63   | 0. 29476 | 10. 30450439 | 1 |
| MSTRG. 6781. 3  | 74   | 0. 30361 | 8. 714050293 | 1 |
| MSTRG. 6781. 4  | 82   | 0. 32105 | 9. 473327637 | 1 |
| MSTRG. 6785. 2  | 218  | 0. 40881 | 7. 743347168 | 1 |
| MSTRG. 6786. 1  | 57   | 0. 35492 | 8. 65045166  | 1 |
| MSTRG. 6786. 2  | 32   | 0. 37873 | 9. 033752441 | 1 |
| MSTRG. 6792. 5  | 429  | 0. 48162 | 4. 540588379 | 1 |
| MSTRG. 6797. 3  | 961  | 0. 48255 | 5. 200866699 | 1 |
| MSTRG. 6797. 4  | 250  | 0. 44606 | 6. 75604248  | 1 |
| MSTRG. 6798. 1  | 56   | 0. 31718 | 7. 894714355 | 1 |
| MSTRG. 6800. 1  | 49   | 0. 26498 | 9. 456115723 | 1 |
| MSTRG. 6806. 2  | 432  | 0. 46818 | 9. 104064941 | 1 |
| MSTRG. 6804. 1  | 190  | 0. 48234 | 9. 038757324 | 1 |
| MSTRG. 6817. 3  | 143  | 0. 33747 | 9. 265075684 | 1 |
| MSTRG. 6823. 1  | 104  | 0. 32858 | 7. 643737793 | 1 |
| MSTRG. 6811. 1  | 92   | 0. 33078 | 10. 53668213 | 1 |
| MSTRG. 6811. 2  | 80   | 0. 3141  | 8. 773376465 | 1 |
| MSTRG. 6857. 1  | 197  | 0. 29187 | 9. 921936035 | 1 |
| MSTRG. 6857. 2  | 702  | 0. 33976 | 5. 347961426 | 1 |
| MSTRG. 6857. 3  | 1114 | 0. 42371 | 5. 840637207 | 1 |
| MSTRG. 6857. 4  | 701  | 0. 343   | 5. 347961426 | 1 |
| MSTRG. 6857. 5  | 98   | 0. 29615 | 10. 90008545 | 1 |
| MSTRG. 6857. 6  | 136  | 0. 28982 | 8. 289123535 | 1 |
| MSTRG. 6857. 7  | 240  | 0. 28982 | 8. 599182129 | 1 |
| MSTRG. 6857. 8  | 131  | 0. 29595 | 8. 49005127  | 1 |
| MSTRG. 6859. 1  | 103  | 0. 30894 | 7. 078063965 | 1 |
| MSTRG. 6859. 2  | 171  | 0. 28923 | 5. 96270752  | 1 |
| MSTRG. 6859. 3  | 91   | 0. 3     | 6. 476379395 | 1 |
| MSTRG. 6859. 4  | 171  | 0. 29088 | 5. 96270752  | 1 |
| MSTRG. 6860. 1  | 125  | 0. 28334 | 8. 420715332 | 1 |
| MSTRG. 6861. 1  | 202  | 0. 29772 | 8. 843688965 | 1 |
| MSTRG. 6861. 2  | 202  | 0. 29772 | 8. 843688965 | 1 |
| MSTRG. 6857. 9  | 151  | 0. 28982 | 9. 817199707 | 1 |
| MSTRG. 6857. 10 | 120  | 0. 28982 | 5. 38104248  | 1 |
| MSTRG. 6857. 11 | 110  | 0. 29367 | 9. 494812012 | 1 |
| MSTRG. 6857. 12 | 110  | 0. 29367 | 9. 494812012 | 1 |
| MSTRG. 6857. 13 | 101  | 0. 28518 | 9. 045227051 | 1 |
| MSTRG. 6857. 14 | 53   | 0. 31638 | 9. 695983887 | 1 |
| MSTRG. 6857. 15 | 188  | 0. 28982 | 10. 19903564 | 1 |
| MSTRG. 6863. 1  | 149  | 0. 29772 | 5. 222839355 | 1 |
| MSTRG. 6864. 1  | 183  | 0. 28982 | 11. 20245361 | 1 |
| MSTRG. 6864. 2  | 73   | 0. 30816 | 10. 43280029 | 1 |

|                 |      |          |              |    |
|-----------------|------|----------|--------------|----|
| MSTRG. 6857. 16 | 92   | 0. 28982 | 5. 74407959  | 1  |
| MSTRG. 6865. 1  | 105  | 0. 32256 | 9. 263977051 | 1  |
| MSTRG. 6857. 17 | 1138 | 0. 40728 | 5. 546936035 | 1  |
| MSTRG. 6857. 19 | 515  | 0. 49541 | 6. 469665527 | 1  |
| MSTRG. 6866. 1  | 309  | 0. 29904 | 6. 171813965 | -1 |
| MSTRG. 6857. 20 | 641  | 0. 35753 | 5. 603088379 | 1  |
| MSTRG. 6857. 21 | 689  | 0. 39342 | 5. 090270996 | 1  |
| MSTRG. 6857. 22 | 640  | 0. 44261 | 5. 603088379 | 1  |
| MSTRG. 6857. 23 | 576  | 0. 41828 | 5. 054626465 | 1  |
| MSTRG. 6827. 2  | 135  | 0. 31753 | 9. 13494873  | 1  |
| MSTRG. 6837. 1  | 88   | 0. 3287  | 8. 804870605 | 1  |
| MSTRG. 6838. 1  | 157  | 0. 32885 | 7. 182067871 | 1  |
| MSTRG. 6839. 1  | 71   | 0. 36666 | 9. 590026855 | 1  |
| MSTRG. 6845. 1  | 99   | 0. 47251 | 8. 807556152 | -1 |
| MSTRG. 6851. 1  | 205  | 0. 36649 | 9. 727111816 | 1  |
| MSTRG. 6851. 2  | 80   | 0. 32973 | 9. 79119873  | 1  |
| MSTRG. 6852. 1  | 72   | 0. 36952 | 9. 889709473 | 1  |
| MSTRG. 6869. 1  | 729  | 0. 46987 | 6. 278747559 | 1  |
| MSTRG. 6871. 2  | 35   | 0. 37671 | 10. 25592041 | 1  |
| MSTRG. 6873. 2  | 211  | 0. 37955 | 6. 73626709  | 1  |
| MSTRG. 6873. 3  | 211  | 0. 34777 | 6. 73626709  | 1  |
| MSTRG. 6884. 1  | 1085 | 0. 36443 | 6. 397399902 | 1  |
| MSTRG. 6885. 1  | 188  | 0. 28923 | 9. 205993652 | 1  |
| MSTRG. 6886. 1  | 346  | 0. 34614 | 9. 299255371 | 1  |
| MSTRG. 6887. 1  | 108  | 0. 31168 | 9. 393127441 | 1  |
| MSTRG. 6888. 1  | 111  | 0. 28982 | 5. 751525879 | 1  |
| MSTRG. 6901. 1  | 54   | 0. 32237 | 9. 30267334  | 1  |
| MSTRG. 6906. 7  | 499  | 0. 26347 | 5. 788635254 | 1  |
| MSTRG. 6906. 8  | 518  | 0. 40451 | 5. 406799316 | 1  |
| MSTRG. 6906. 9  | 445  | 0. 30918 | 5. 759460449 | 1  |
| MSTRG. 6906. 10 | 280  | 0. 42004 | 5. 089904785 | 1  |
| MSTRG. 6907. 1  | 157  | 0. 30186 | 7. 63458252  | 1  |
| MSTRG. 6902. 1  | 50   | 0. 37964 | 10. 69744873 | -1 |
| MSTRG. 6919. 1  | 96   | 0. 27517 | 7. 754699707 | 1  |
| MSTRG. 6920. 1  | 156  | 0. 27289 | 9. 729675293 | 1  |
| MSTRG. 6921. 1  | 66   | 0. 33674 | 7. 668884277 | 1  |
| MSTRG. 6922. 4  | 182  | 0. 28338 | 6. 047058105 | 1  |
| MSTRG. 6922. 3  | 922  | 0. 40857 | 6. 148742676 | 1  |
| MSTRG. 6922. 5  | 118  | 0. 29607 | 6. 473937988 | 1  |
| MSTRG. 6923. 1  | 30   | 0. 28923 | 6. 685852051 | 1  |
| MSTRG. 6925. 1  | 82   | 0. 42163 | 9. 792663574 | 1  |
| MSTRG. 6925. 2  | 82   | 0. 26292 | 9. 792663574 | 1  |
| MSTRG. 6925. 3  | 82   | 0. 33395 | 9. 792663574 | 1  |
| MSTRG. 6926. 1  | 58   | 0. 34018 | 7. 998596191 | -1 |
| MSTRG. 6934. 1  | 210  | 0. 32179 | 8. 300476074 | 1  |
| MSTRG. 6939. 3  | 119  | 0. 30557 | 6. 285217285 | 1  |
| MSTRG. 6941. 1  | 316  | 0. 44012 | 5. 612731934 | 1  |
| MSTRG. 6941. 2  | 316  | 0. 44012 | 5. 612731934 | 1  |
| MSTRG. 6943. 1  | 168  | 0. 37602 | 4. 777404785 | 1  |
| MSTRG. 6943. 2  | 168  | 0. 34675 | 4. 777404785 | 1  |
| MSTRG. 6943. 4  | 168  | 0. 34498 | 4. 777404785 | 1  |
| MSTRG. 6945. 2  | 658  | 0. 43845 | 8. 129577637 | 1  |
| MSTRG. 6947. 3  | 989  | 0. 42875 | 8. 844909668 | 1  |
| MSTRG. 6947. 4  | 957  | 0. 44925 | 8. 782409668 | 1  |

|                 |      |          |              |    |
|-----------------|------|----------|--------------|----|
| MSTRG. 6947. 6  | 989  | 0. 42875 | 8. 844909668 | 1  |
| MSTRG. 6948. 1  | 201  | 0. 3481  | 9. 69329834  | 1  |
| MSTRG. 6947. 7  | 989  | 0. 41954 | 8. 844909668 | 1  |
| MSTRG. 6947. 8  | 543  | 0. 45651 | 8. 874328613 | 1  |
| MSTRG. 6956. 3  | 707  | 0. 33497 | 6. 043518066 | 1  |
| MSTRG. 6962. 4  | 142  | 0. 46649 | 6. 11126709  | 1  |
| MSTRG. 6962. 5  | 252  | 0. 45635 | 4. 843078613 | 1  |
| MSTRG. 6966. 4  | 1867 | 0. 40086 | 6. 33770752  | 1  |
| MSTRG. 6967. 3  | 164  | 0. 34144 | 5. 841369629 | 1  |
| MSTRG. 6970. 3  | 1201 | 0. 4448  | 5. 316833496 | 1  |
| MSTRG. 6973. 5  | 1000 | 0. 45251 | 5. 781066895 | -1 |
| MSTRG. 6974. 1  | 182  | 0. 45231 | 4. 807556152 | 1  |
| MSTRG. 6975. 1  | 400  | 0. 3691  | 6. 424133301 | 1  |
| MSTRG. 6985. 1  | 1086 | 0. 42455 | 6. 043395996 | 1  |
| MSTRG. 6986. 1  | 211  | 0. 38242 | 9. 172668457 | 1  |
| MSTRG. 6986. 4  | 187  | 0. 40292 | 9. 198303223 | 1  |
| MSTRG. 6988. 1  | 60   | 0. 36342 | 6. 040588379 | 1  |
| MSTRG. 6997. 1  | 41   | 0. 29654 | 10. 01068115 | 1  |
| MSTRG. 6997. 2  | 41   | 0. 29727 | 10. 01068115 | 1  |
| MSTRG. 6995. 2  | 91   | 0. 37095 | 6. 020202637 | 1  |
| MSTRG. 6995. 4  | 91   | 0. 343   | 6. 020202637 | 1  |
| MSTRG. 6995. 3  | 91   | 0. 36939 | 6. 020202637 | 1  |
| MSTRG. 6995. 5  | 91   | 0. 40722 | 6. 020202637 | -1 |
| MSTRG. 6977. 1  | 113  | 0. 4146  | 10. 99310303 | 1  |
| MSTRG. 6977. 2  | 201  | 0. 34673 | 10. 33795166 | 1  |
| MSTRG. 6977. 3  | 201  | 0. 39393 | 10. 33795166 | 1  |
| MSTRG. 6977. 4  | 201  | 0. 40221 | 10. 33795166 | 1  |
| MSTRG. 6977. 5  | 28   | 0. 40769 | 9. 00592041  | 1  |
| MSTRG. 6980. 3  | 488  | 0. 4166  | 5. 356506348 | 1  |
| MSTRG. 6980. 2  | 547  | 0. 41474 | 5. 884338379 | 1  |
| MSTRG. 6981. 6  | 205  | 0. 30544 | 8. 370910645 | 1  |
| MSTRG. 6981. 4  | 215  | 0. 27674 | 8. 294128418 | 1  |
| MSTRG. 6981. 5  | 215  | 0. 27674 | 8. 294128418 | 1  |
| MSTRG. 7007. 1  | 298  | 0. 38078 | 8. 793518066 | 1  |
| MSTRG. 7007. 2  | 774  | 0. 37294 | 6. 848815918 | 1  |
| MSTRG. 7007. 4  | 341  | 0. 37152 | 8. 995666504 | 1  |
| MSTRG. 7007. 5  | 774  | 0. 34584 | 6. 848815918 | 1  |
| MSTRG. 7008. 2  | 138  | 0. 41701 | 9. 729431152 | 1  |
| MSTRG. 7007. 11 | 775  | 0. 38035 | 6. 398620605 | 1  |
| MSTRG. 6982. 1  | 109  | 0. 4635  | 9. 81060791  | 1  |
| MSTRG. 6983. 1  | 78   | 0. 31962 | 9. 776184082 | 1  |
| MSTRG. 6982. 3  | 109  | 0. 40264 | 9. 81060791  | 1  |
| MSTRG. 7005. 3  | 108  | 0. 45406 | 10. 53363037 | 1  |
| MSTRG. 7006. 1  | 406  | 0. 43947 | 8. 184020996 | 1  |
| MSTRG. 7012. 2  | 237  | 0. 42986 | 7. 864807129 | 1  |
| MSTRG. 7019. 1  | 183  | 0. 27415 | 10. 18499756 | 1  |
| MSTRG. 7035. 2  | 565  | 0. 42641 | 8. 943054199 | 1  |
| MSTRG. 7041. 4  | 148  | 0. 40266 | 10. 18438721 | 1  |
| MSTRG. 7044. 1  | 70   | 0. 34162 | 10. 04400635 | 1  |
| MSTRG. 7050. 1  | 47   | 0. 43093 | 10. 02435303 | 1  |
| MSTRG. 7050. 3  | 50   | 0. 41982 | 9. 511657715 | 1  |
| MSTRG. 7050. 2  | 91   | 0. 32485 | 9. 718688965 | 1  |
| MSTRG. 7054. 1  | 68   | 0. 42458 | 7. 779724121 | -1 |
| MSTRG. 7075. 4  | 266  | 0. 42528 | 8. 679016113 | 1  |

|                |      |          |              |    |
|----------------|------|----------|--------------|----|
| MSTRG. 7075. 5 | 76   | 0. 32402 | 8. 686096191 | 1  |
| MSTRG. 7079. 1 | 406  | 0. 45354 | 5. 950622559 | 1  |
| MSTRG. 7083. 1 | 75   | 0. 3351  | 6. 476257324 | -1 |
| MSTRG. 7077. 3 | 288  | 0. 45623 | 4. 917297363 | 1  |
| MSTRG. 7091. 3 | 756  | 0. 47251 | 7. 883728027 | 1  |
| MSTRG. 7091. 5 | 928  | 0. 46923 | 8. 452087402 | 1  |
| MSTRG. 7091. 4 | 928  | 0. 45566 | 8. 452087402 | 1  |
| MSTRG. 7096. 1 | 112  | 0. 28711 | 9. 255065918 | 1  |
| MSTRG. 7102. 1 | 289  | 0. 34183 | 6. 066833496 | 1  |
| MSTRG. 7102. 2 | 427  | 0. 33379 | 7. 055480957 | 1  |
| MSTRG. 7102. 3 | 289  | 0. 36233 | 6. 066833496 | 1  |
| MSTRG. 7103. 1 | 123  | 0. 35136 | 9. 695861816 | 1  |
| MSTRG. 7104. 1 | 915  | 0. 4561  | 6. 097717285 | 1  |
| MSTRG. 7110. 1 | 54   | 0. 38945 | 6. 697937012 | 1  |
| MSTRG. 7111. 3 | 398  | 0. 44254 | 7. 198913574 | 1  |
| MSTRG. 7111. 4 | 256  | 0. 46621 | 8. 141052246 | 1  |
| MSTRG. 7111. 5 | 264  | 0. 43633 | 8. 13861084  | 1  |
| MSTRG. 7118. 2 | 150  | 0. 43275 | 4. 518981934 | 1  |
| MSTRG. 7122. 3 | 160  | 0. 42095 | 9. 56463623  | 1  |
| MSTRG. 7130. 2 | 1683 | 0. 37996 | 5. 819152832 | 1  |
| MSTRG. 7130. 3 | 1683 | 0. 383   | 5. 819152832 | 1  |
| MSTRG. 7130. 4 | 324  | 0. 41909 | 5. 735900879 | 1  |
| MSTRG. 7135. 3 | 94   | 0. 34351 | 9. 514709473 | 1  |
| MSTRG. 7135. 4 | 69   | 0. 29856 | 8. 930480957 | -1 |
| MSTRG. 7138. 2 | 718  | 0. 44598 | 8. 620056152 | 1  |
| MSTRG. 7141. 1 | 629  | 0. 44277 | 8. 52154541  | 1  |
| MSTRG. 7141. 3 | 497  | 0. 37046 | 6. 074157715 | 1  |
| MSTRG. 7142. 1 | 73   | 0. 29793 | 8. 121276855 | 1  |
| MSTRG. 7147. 3 | 51   | 0. 33117 | 5. 293273926 | 1  |
| MSTRG. 7147. 2 | 573  | 0. 44488 | 5. 807922363 | 1  |
| MSTRG. 7146. 1 | 72   | 0. 40201 | 9. 65411377  | -1 |
| MSTRG. 7154. 2 | 662  | 0. 45693 | 4. 91973877  | 1  |
| MSTRG. 7154. 5 | 662  | 0. 45385 | 4. 91973877  | 1  |
| MSTRG. 7154. 6 | 139  | 0. 30173 | 9. 239807129 | 1  |
| MSTRG. 7156. 1 | 411  | 0. 32255 | 8. 858337402 | 1  |
| MSTRG. 7161. 1 | 652  | 0. 39359 | 7. 671813965 | 1  |
| MSTRG. 7161. 2 | 643  | 0. 31725 | 7. 63104248  | 1  |
| MSTRG. 7162. 1 | 193  | 0. 38199 | 6. 741516113 | 1  |
| MSTRG. 7164. 1 | 216  | 0. 45755 | 9. 679260254 | -1 |
| MSTRG. 7165. 1 | 156  | 0. 37967 | 6. 614196777 | 1  |
| MSTRG. 7165. 2 | 124  | 0. 33214 | 9. 546813965 | 1  |
| MSTRG. 7166. 1 | 116  | 0. 3644  | 9. 301940918 | 1  |
| MSTRG. 7169. 1 | 51   | 0. 34492 | 9. 506286621 | 1  |
| MSTRG. 7177. 1 | 151  | 0. 33204 | 10. 53265381 | 1  |
| MSTRG. 7178. 1 | 104  | 0. 35741 | 6. 88885498  | 1  |
| MSTRG. 7178. 2 | 102  | 0. 41081 | 7. 597106934 | 1  |
| MSTRG. 7177. 2 | 55   | 0. 28779 | 11. 36480713 | 1  |
| MSTRG. 7177. 3 | 55   | 0. 28567 | 11. 36480713 | 1  |
| MSTRG. 7177. 4 | 55   | 0. 27911 | 11. 36480713 | 1  |
| MSTRG. 7177. 8 | 55   | 0. 28779 | 11. 36480713 | 1  |
| MSTRG. 7177. 7 | 55   | 0. 28931 | 11. 36480713 | 1  |
| MSTRG. 7177. 6 | 55   | 0. 29435 | 11. 36480713 | 1  |
| MSTRG. 7177. 5 | 55   | 0. 2971  | 11. 36480713 | 1  |
| MSTRG. 7177. 9 | 93   | 0. 34343 | 8. 992980957 | 1  |



|                 |      |          |              |    |
|-----------------|------|----------|--------------|----|
| MSTRG. 7177. 10 | 55   | 0. 28779 | 11. 36480713 | 1  |
| MSTRG. 7177. 11 | 39   | 0. 28063 | 7. 846496582 | 1  |
| MSTRG. 7177. 12 | 39   | 0. 28063 | 7. 846496582 | 1  |
| MSTRG. 7177. 15 | 55   | 0. 31649 | 11. 36480713 | 1  |
| MSTRG. 7177. 16 | 55   | 0. 28959 | 11. 36480713 | 1  |
| MSTRG. 7177. 13 | 55   | 0. 28931 | 11. 36480713 | 1  |
| MSTRG. 7177. 14 | 55   | 0. 29435 | 11. 36480713 | 1  |
| MSTRG. 7177. 18 | 108  | 0. 29772 | 5. 823425293 | 1  |
| MSTRG. 7177. 19 | 93   | 0. 34314 | 8. 992980957 | 1  |
| MSTRG. 7179. 1  | 71   | 0. 33478 | 6. 037658691 | 1  |
| MSTRG. 7172. 1  | 115  | 0. 27794 | 6. 379577637 | 1  |
| MSTRG. 7176. 7  | 352  | 0. 34209 | 7. 157653809 | 1  |
| MSTRG. 7176. 4  | 801  | 0. 45787 | 5. 944030762 | 1  |
| MSTRG. 7176. 5  | 352  | 0. 34149 | 7. 157653809 | 1  |
| MSTRG. 7176. 6  | 352  | 0. 33383 | 7. 157653809 | 1  |
| MSTRG. 7183. 1  | 505  | 0. 3594  | 6. 766540527 | 1  |
| MSTRG. 7183. 3  | 505  | 0. 40385 | 6. 766540527 | 1  |
| MSTRG. 7189. 1  | 107  | 0. 28648 | 8. 719299316 | 1  |
| MSTRG. 7191. 3  | 355  | 0. 35107 | 9. 012268066 | 1  |
| MSTRG. 7194. 1  | 125  | 0. 35633 | 8. 281921387 | 1  |
| MSTRG. 7195. 1  | 302  | 0. 32346 | 9. 282043457 | 1  |
| MSTRG. 7195. 2  | 325  | 0. 35361 | 9. 325012207 | 1  |
| MSTRG. 7196. 1  | 200  | 0. 28648 | 9. 516296387 | 1  |
| MSTRG. 7195. 3  | 152  | 0. 29135 | 9. 161437988 | 1  |
| MSTRG. 7186. 1  | 29   | 0. 43737 | 11. 01275635 | 1  |
| MSTRG. 7197. 3  | 602  | 0. 38942 | 9. 389587402 | 1  |
| MSTRG. 7200. 2  | 734  | 0. 41842 | 8. 471740723 | 1  |
| MSTRG. 7200. 3  | 734  | 0. 41842 | 8. 471740723 | 1  |
| MSTRG. 7202. 1  | 114  | 0. 34452 | 6. 785461426 | 1  |
| MSTRG. 7206. 4  | 449  | 0. 30197 | 6. 095031738 | 1  |
| MSTRG. 7206. 5  | 381  | 0. 36815 | 8. 477966309 | 1  |
| MSTRG. 7206. 6  | 380  | 0. 44503 | 8. 477966309 | 1  |
| MSTRG. 7207. 1  | 96   | 0. 29772 | 9. 743469238 | 1  |
| MSTRG. 7206. 7  | 117  | 0. 28883 | 9. 924865723 | 1  |
| MSTRG. 7211. 1  | 93   | 0. 31471 | 8. 976867676 | 1  |
| MSTRG. 7213. 1  | 166  | 0. 35513 | 8. 437316895 | 1  |
| MSTRG. 7216. 2  | 548  | 0. 43904 | 5. 785339355 | 1  |
| MSTRG. 7220. 2  | 197  | 0. 4014  | 6. 215881348 | 1  |
| MSTRG. 7220. 3  | 107  | 0. 36305 | 5. 039367676 | 1  |
| MSTRG. 7220. 4  | 119  | 0. 48858 | 5. 49005127  | 1  |
| MSTRG. 7225. 1  | 596  | 0. 34769 | 5. 464294434 | 1  |
| MSTRG. 7227. 1  | 269  | 0. 35283 | 6. 05682373  | 1  |
| MSTRG. 7232. 2  | 175  | 0. 28571 | 8. 957092285 | 1  |
| MSTRG. 7232. 3  | 122  | 0. 27327 | 11. 89935303 | 1  |
| MSTRG. 7232. 1  | 824  | 0. 29514 | 7. 783752441 | 1  |
| MSTRG. 7232. 4  | 824  | 0. 29762 | 7. 783752441 | 1  |
| MSTRG. 7232. 5  | 824  | 0. 29514 | 7. 783752441 | 1  |
| MSTRG. 7232. 6  | 144  | 0. 27075 | 6. 67376709  | 1  |
| MSTRG. 7235. 3  | 1027 | 0. 45179 | 5. 866149902 | 1  |
| MSTRG. 7235. 4  | 852  | 0. 42073 | 5. 543395996 | -1 |
| MSTRG. 7245. 1  | 80   | 0. 36151 | 7. 807800293 | 1  |
| MSTRG. 7258. 7  | 535  | 0. 47104 | 7. 18157959  | 1  |
| MSTRG. 7258. 6  | 576  | 0. 47571 | 6. 882995605 | 1  |
| MSTRG. 7258. 5  | 587  | 0. 48315 | 7. 183410645 | 1  |

|                 |      |          |              |    |
|-----------------|------|----------|--------------|----|
| MSTRG. 7260. 1  | 87   | 0. 30303 | 9. 096252441 | 1  |
| MSTRG. 7262. 3  | 778  | 0. 40163 | 5. 855773926 | 1  |
| MSTRG. 7262. 5  | 203  | 0. 30993 | 4. 700378418 | 1  |
| MSTRG. 7263. 1  | 128  | 0. 29367 | 10. 49493408 | 1  |
| MSTRG. 7263. 2  | 121  | 0. 31852 | 8. 818054199 | 1  |
| MSTRG. 7264. 1  | 61   | 0. 28951 | 8. 907409668 | 1  |
| MSTRG. 7266. 9  | 1723 | 0. 42806 | 8. 097229004 | 1  |
| MSTRG. 7266. 12 | 90   | 0. 3375  | 6. 696594238 | 1  |
| MSTRG. 7268. 1  | 69   | 0. 39053 | 9. 503479004 | 1  |
| MSTRG. 7269. 5  | 94   | 0. 39218 | 9. 151672363 | 1  |
| MSTRG. 7269. 7  | 112  | 0. 4082  | 8. 913635254 | 1  |
| MSTRG. 7269. 3  | 112  | 0. 34875 | 8. 913635254 | 1  |
| MSTRG. 7269. 4  | 117  | 0. 32478 | 8. 821472168 | 1  |
| MSTRG. 7269. 6  | 108  | 0. 2765  | 9. 715148926 | 1  |
| MSTRG. 7269. 8  | 240  | 0. 31041 | 6. 686584473 | 1  |
| MSTRG. 7269. 9  | 94   | 0. 30141 | 9. 151672363 | 1  |
| MSTRG. 7270. 1  | 146  | 0. 3561  | 10. 09588623 | 1  |
| MSTRG. 7271. 1  | 97   | 0. 34331 | 10. 14825439 | 1  |
| MSTRG. 7277. 1  | 126  | 0. 30119 | 9. 514709473 | 1  |
| MSTRG. 7278. 1  | 151  | 0. 3096  | 10. 71783447 | 1  |
| MSTRG. 7279. 1  | 79   | 0. 28982 | 8. 985046387 | 1  |
| MSTRG. 7276. 3  | 190  | 0. 30816 | 9. 446594238 | 1  |
| MSTRG. 7276. 4  | 570  | 0. 30387 | 8. 528503418 | 1  |
| MSTRG. 7281. 1  | 70   | 0. 41832 | 10. 18243408 | -1 |
| MSTRG. 7281. 2  | 70   | 0. 35834 | 10. 18243408 | -1 |
| MSTRG. 7286. 10 | 819  | 0. 4353  | 8. 704406738 | 1  |
| MSTRG. 7286. 3  | 986  | 0. 47921 | 6. 880310059 | 1  |
| MSTRG. 7286. 5  | 966  | 0. 47921 | 7. 060119629 | 1  |
| MSTRG. 7286. 7  | 884  | 0. 46076 | 6. 106262207 | 1  |
| MSTRG. 7286. 8  | 478  | 0. 42681 | 8. 510681152 | 1  |
| MSTRG. 7286. 9  | 925  | 0. 4723  | 6. 269958496 | 1  |
| MSTRG. 7286. 11 | 985  | 0. 49307 | 6. 880310059 | 1  |
| MSTRG. 7286. 17 | 158  | 0. 37649 | 5. 614929199 | 1  |
| MSTRG. 7292. 1  | 500  | 0. 47011 | 9. 214660645 | 1  |
| MSTRG. 7292. 3  | 292  | 0. 45215 | 6. 44708252  | 1  |
| MSTRG. 7293. 3  | 338  | 0. 32178 | 4. 91204834  | 1  |
| MSTRG. 7296. 1  | 506  | 0. 38993 | 5. 448059082 | 1  |
| MSTRG. 7297. 3  | 981  | 0. 43288 | 5. 344055176 | 1  |
| MSTRG. 7297. 5  | 981  | 0. 43288 | 5. 375549316 | 1  |
| MSTRG. 7298. 1  | 76   | 0. 42828 | 5. 364929199 | 1  |
| MSTRG. 7300. 1  | 83   | 0. 29367 | 7. 749816895 | 1  |
| MSTRG. 7297. 6  | 100  | 0. 41927 | 10. 00872803 | 1  |
| MSTRG. 7297. 7  | 129  | 0. 29526 | 9. 715148926 | 1  |
| MSTRG. 7295. 2  | 96   | 0. 31532 | 9. 147888184 | 1  |
| MSTRG. 7303. 1  | 184  | 0. 29727 | 10. 18499756 | 1  |
| MSTRG. 7306. 1  | 144  | 0. 34227 | 4. 293395996 | 1  |
| MSTRG. 7306. 2  | 41   | 0. 47102 | 5. 601623535 | 1  |
| MSTRG. 7316. 1  | 275  | 0. 36484 | 8. 955749512 | 1  |
| MSTRG. 7317. 1  | 150  | 0. 29839 | 8. 57244873  | 1  |
| MSTRG. 7322. 4  | 419  | 0. 43487 | 5. 855773926 | 1  |
| MSTRG. 7322. 5  | 419  | 0. 4505  | 5. 855773926 | 1  |
| MSTRG. 7323. 1  | 70   | 0. 3895  | 9. 828552246 | 1  |
| MSTRG. 7323. 2  | 47   | 0. 38733 | 5. 13104248  | 1  |
| MSTRG. 7325. 1  | 48   | 0. 35614 | 6. 508483887 | 1  |

|                 |      |          |              |    |
|-----------------|------|----------|--------------|----|
| MSTRG. 7320. 1  | 42   | 0. 39752 | 11. 55377197 | 1  |
| MSTRG. 7320. 2  | 123  | 0. 35941 | 9. 912658691 | 1  |
| MSTRG. 7321. 1  | 33   | 0. 29579 | 9. 034240723 | 1  |
| MSTRG. 7333. 5  | 428  | 0. 4369  | 4. 641418457 | 1  |
| MSTRG. 7335. 2  | 715  | 0. 46052 | 6. 39630127  | 1  |
| MSTRG. 7335. 4  | 715  | 0. 46601 | 6. 39630127  | 1  |
| MSTRG. 7335. 5  | 715  | 0. 45772 | 6. 39630127  | 1  |
| MSTRG. 7335. 8  | 715  | 0. 46668 | 6. 39630127  | 1  |
| MSTRG. 7335. 9  | 750  | 0. 46304 | 6. 383972168 | 1  |
| MSTRG. 7335. 10 | 561  | 0. 46806 | 8. 162414551 | 1  |
| MSTRG. 7335. 11 | 167  | 0. 4503  | 4. 975646973 | 1  |
| MSTRG. 7335. 12 | 167  | 0. 4503  | 4. 975646973 | 1  |
| MSTRG. 7335. 13 | 167  | 0. 42963 | 4. 975646973 | 1  |
| MSTRG. 7340. 2  | 234  | 0. 31903 | 5. 982971191 | 1  |
| MSTRG. 7340. 3  | 57   | 0. 25541 | 8. 602722168 | 1  |
| MSTRG. 7340. 4  | 53   | 0. 25541 | 6. 708312988 | 1  |
| MSTRG. 7341. 1  | 49   | 0. 46508 | 5. 079162598 | -1 |
| MSTRG. 7342. 1  | 114  | 0. 3277  | 9. 576721191 | 1  |
| MSTRG. 7343. 1  | 213  | 0. 33438 | 6. 893127441 | 1  |
| MSTRG. 7344. 4  | 122  | 0. 30085 | 9. 687072754 | 1  |
| MSTRG. 7346. 1  | 73   | 0. 38982 | 8. 534729004 | 1  |
| MSTRG. 7348. 1  | 71   | 0. 44107 | 9. 343200684 | -1 |
| MSTRG. 7350. 1  | 296  | 0. 42119 | 5. 664611816 | 1  |
| MSTRG. 7354. 2  | 666  | 0. 35806 | 7. 63458252  | 1  |
| MSTRG. 7359. 1  | 84   | 0. 44235 | 11. 39508057 | 1  |
| MSTRG. 7370. 1  | 106  | 0. 34952 | 4. 538757324 | 1  |
| MSTRG. 7371. 1  | 103  | 0. 30647 | 9. 831726074 | 1  |
| MSTRG. 7369. 3  | 146  | 0. 41532 | 8. 866760254 | 1  |
| MSTRG. 7372. 1  | 194  | 0. 28923 | 9. 368347168 | 1  |
| MSTRG. 7373. 1  | 136  | 0. 33843 | 9. 160583496 | 1  |
| MSTRG. 7374. 1  | 157  | 0. 28584 | 9. 971862793 | 1  |
| MSTRG. 7366. 2  | 1037 | 0. 44646 | 7. 175354004 | 1  |
| MSTRG. 7365. 1  | 26   | 0. 39206 | 9. 772888184 | -1 |
| MSTRG. 7390. 1  | 43   | 0. 3963  | 5. 461242676 | 1  |
| MSTRG. 7392. 1  | 83   | 0. 30807 | 10. 0112915  | 1  |
| MSTRG. 7393. 1  | 35   | 0. 42548 | 9. 18560791  | -1 |
| MSTRG. 7394. 1  | 65   | 0. 37728 | 10. 59429932 | 1  |
| MSTRG. 7376. 3  | 358  | 0. 44332 | 5. 460876465 | 1  |
| MSTRG. 7376. 5  | 358  | 0. 44403 | 5. 460876465 | 1  |
| MSTRG. 7382. 1  | 106  | 0. 31696 | 6. 24420166  | 1  |
| MSTRG. 7385. 1  | 84   | 0. 30684 | 9. 160705566 | 1  |
| MSTRG. 7387. 1  | 350  | 0. 33345 | 4. 987609863 | 1  |
| MSTRG. 7415. 2  | 819  | 0. 46615 | 7. 309265137 | 1  |
| MSTRG. 7415. 4  | 99   | 0. 2921  | 9. 40057373  | 1  |
| MSTRG. 7415. 3  | 819  | 0. 36212 | 7. 309265137 | 1  |
| MSTRG. 7415. 5  | 170  | 0. 28165 | 7. 617004395 | 1  |
| MSTRG. 7415. 6  | 144  | 0. 3     | 7. 660095215 | 1  |
| MSTRG. 7415. 7  | 819  | 0. 41871 | 7. 309265137 | 1  |
| MSTRG. 7421. 3  | 200  | 0. 44925 | 5. 086853027 | 1  |
| MSTRG. 7423. 4  | 238  | 0. 43027 | 9. 062805176 | 1  |
| MSTRG. 7423. 2  | 238  | 0. 45299 | 9. 062805176 | 1  |
| MSTRG. 7423. 3  | 238  | 0. 44098 | 9. 062805176 | 1  |
| MSTRG. 7426. 1  | 958  | 0. 45914 | 6. 648132324 | 1  |
| MSTRG. 7431. 1  | 248  | 0. 39475 | 9. 284973145 | 1  |

|                |      |          |              |    |
|----------------|------|----------|--------------|----|
| MSTRG. 7431. 2 | 284  | 0. 39069 | 9. 042907715 | 1  |
| MSTRG. 7432. 1 | 474  | 0. 46795 | 10. 31158447 | 1  |
| MSTRG. 7432. 9 | 88   | 0. 31596 | 9. 199645996 | 1  |
| MSTRG. 7432. 5 | 1117 | 0. 45669 | 4. 562927246 | 1  |
| MSTRG. 7432. 6 | 1243 | 0. 43744 | 4. 647155762 | 1  |
| MSTRG. 7432. 7 | 1243 | 0. 46489 | 4. 647155762 | 1  |
| MSTRG. 7434. 1 | 32   | 0. 28663 | 8. 496398926 | 1  |
| MSTRG. 7429. 1 | 120  | 0. 40374 | 10. 17315674 | 1  |
| MSTRG. 7429. 2 | 120  | 0. 3581  | 10. 17315674 | 1  |
| MSTRG. 7437. 1 | 17   | 0. 41006 | 4. 207092285 | 1  |
| MSTRG. 7438. 1 | 160  | 0. 3319  | 7. 637878418 | 1  |
| MSTRG. 7439. 4 | 329  | 0. 46325 | 7. 945861816 | 1  |
| MSTRG. 7441. 1 | 656  | 0. 36152 | 4. 94329834  | 1  |
| MSTRG. 7448. 1 | 122  | 0. 29283 | 9. 950134277 | 1  |
| MSTRG. 7448. 2 | 110  | 0. 30464 | 6. 571228027 | 1  |
| MSTRG. 7452. 1 | 643  | 0. 3492  | 7. 549865723 | 1  |
| MSTRG. 7452. 3 | 643  | 0. 34584 | 7. 549865723 | 1  |
| MSTRG. 7454. 1 | 127  | 0. 28015 | 7. 097473145 | 1  |
| MSTRG. 7451. 2 | 394  | 0. 37289 | 7. 631408691 | 1  |
| MSTRG. 7455. 1 | 1516 | 0. 46956 | 5. 132263184 | 1  |
| MSTRG. 7455. 2 | 1613 | 0. 4272  | 5. 114318848 | 1  |
| MSTRG. 7456. 6 | 361  | 0. 40089 | 6. 847717285 | 1  |
| MSTRG. 7456. 7 | 361  | 0. 44855 | 6. 847717285 | 1  |
| MSTRG. 7456. 8 | 361  | 0. 44931 | 6. 847717285 | 1  |
| MSTRG. 7458. 1 | 82   | 0. 35853 | 8. 382629395 | 1  |
| MSTRG. 7457. 3 | 93   | 0. 29755 | 9. 512145996 | 1  |
| MSTRG. 7462. 1 | 84   | 0. 45352 | 10. 53375244 | 1  |
| MSTRG. 7467. 1 | 141  | 0. 47671 | 11. 39508057 | 1  |
| MSTRG. 7465. 1 | 457  | 0. 39263 | 7. 915710449 | 1  |
| MSTRG. 7470. 1 | 31   | 0. 35998 | 9. 819763184 | 1  |
| MSTRG. 7474. 2 | 144  | 0. 43084 | 8. 980285645 | 1  |
| MSTRG. 7476. 1 | 48   | 0. 36751 | 7. 78704834  | 1  |
| MSTRG. 7487. 1 | 68   | 0. 34045 | 4. 406066895 | 1  |
| MSTRG. 7485. 2 | 408  | 0. 47176 | 5. 111877441 | 1  |
| MSTRG. 7499. 1 | 991  | 0. 48309 | 9. 257751465 | 1  |
| MSTRG. 7496. 1 | 96   | 0. 38148 | 4. 867370605 | 1  |
| MSTRG. 7501. 1 | 56   | 0. 35273 | 6. 88470459  | 1  |
| MSTRG. 7505. 1 | 496  | 0. 39052 | 5. 41217041  | 1  |
| MSTRG. 7505. 2 | 496  | 0. 39052 | 5. 41217041  | 1  |
| MSTRG. 7518. 1 | 71   | 0. 31806 | 9. 638122559 | 1  |
| MSTRG. 7529. 1 | 21   | 0. 35956 | 4. 746154785 | 1  |
| MSTRG. 7529. 2 | 77   | 0. 33098 | 9. 57623291  | 1  |
| MSTRG. 7531. 1 | 74   | 0. 34981 | 11. 08831787 | 1  |
| MSTRG. 7534. 1 | 77   | 0. 428   | 4. 333190918 | 1  |
| MSTRG. 7537. 4 | 640  | 0. 43901 | 4. 454772949 | 1  |
| MSTRG. 7538. 1 | 324  | 0. 46022 | 7. 060119629 | -1 |
| MSTRG. 7539. 1 | 739  | 0. 42846 | 5. 995910645 | 1  |
| MSTRG. 7541. 1 | 298  | 0. 37948 | 4. 658630371 | 1  |
| MSTRG. 7542. 1 | 29   | 0. 31081 | 7. 999450684 | 1  |
| MSTRG. 7539. 2 | 705  | 0. 41741 | 5. 867492676 | 1  |
| MSTRG. 7544. 2 | 147  | 0. 3973  | 9. 687561035 | 1  |
| MSTRG. 7551. 1 | 1183 | 0. 43703 | 9. 02935791  | 1  |
| MSTRG. 7551. 2 | 1183 | 0. 43208 | 9. 02935791  | 1  |
| MSTRG. 7552. 1 | 68   | 0. 4146  | 10. 04803467 | -1 |

|                |      |          |              |    |
|----------------|------|----------|--------------|----|
| MSTRG. 7552. 3 | 66   | 0. 43473 | 10. 04803467 | -1 |
| MSTRG. 7552. 2 | 71   | 0. 40313 | 10. 04412842 | -1 |
| MSTRG. 7556. 2 | 822  | 0. 46821 | 4. 900817871 | 1  |
| MSTRG. 7557. 1 | 265  | 0. 37291 | 8. 828796387 | 1  |
| MSTRG. 7557. 2 | 284  | 0. 37287 | 8. 666564941 | 1  |
| MSTRG. 7557. 3 | 305  | 0. 43353 | 9. 403625488 | 1  |
| MSTRG. 7557. 4 | 84   | 0. 38184 | 11. 78631592 | 1  |
| MSTRG. 7557. 5 | 301  | 0. 37039 | 9. 512145996 | 1  |
| MSTRG. 7557. 6 | 322  | 0. 42647 | 9. 840515137 | 1  |
| MSTRG. 7560. 3 | 88   | 0. 46094 | 12. 12713623 | 1  |
| MSTRG. 7562. 6 | 529  | 0. 42225 | 8. 471130371 | 1  |
| MSTRG. 7562. 7 | 575  | 0. 44449 | 9. 184753418 | 1  |
| MSTRG. 7562. 8 | 498  | 0. 45374 | 8. 777648926 | 1  |
| MSTRG. 7563. 1 | 245  | 0. 34824 | 6. 547546387 | 1  |
| MSTRG. 7563. 2 | 168  | 0. 35445 | 8. 512268066 | 1  |
| MSTRG. 7563. 4 | 239  | 0. 41799 | 6. 196594238 | 1  |
| MSTRG. 7573. 4 | 1904 | 0. 46114 | 5. 600036621 | 1  |
| MSTRG. 7573. 5 | 1899 | 0. 46114 | 5. 721008301 | 1  |
| MSTRG. 7585. 1 | 89   | 0. 32477 | 4. 741027832 | 1  |
| MSTRG. 7572. 1 | 349  | 0. 36185 | 6. 594543457 | 1  |
| MSTRG. 7572. 2 | 245  | 0. 39731 | 8. 863708496 | 1  |
| MSTRG. 7580. 2 | 460  | 0. 40788 | 7. 640075684 | 1  |
| MSTRG. 7588. 2 | 159  | 0. 42763 | 5. 911804199 | 1  |
| MSTRG. 7591. 2 | 2810 | 0. 40048 | 5. 377258301 | 1  |
| MSTRG. 7591. 3 | 2810 | 0. 40048 | 5. 377258301 | 1  |
| MSTRG. 7591. 4 | 218  | 0. 36834 | 6. 305358887 | 1  |
| MSTRG. 7592. 1 | 390  | 0. 43611 | 5. 428405762 | 1  |
| MSTRG. 7594. 1 | 54   | 0. 37467 | 9. 075866699 | 1  |
| MSTRG. 7597. 2 | 57   | 0. 44861 | 8. 844909668 | 1  |
| MSTRG. 7597. 1 | 24   | 0. 41278 | 4. 01751709  | 1  |
| MSTRG. 7600. 1 | 849  | 0. 48772 | 6. 358459473 | 1  |
| MSTRG. 7604. 3 | 431  | 0. 28063 | 4. 983093262 | 1  |
| MSTRG. 7604. 4 | 431  | 0. 27587 | 4. 983093262 | 1  |
| MSTRG. 7604. 5 | 127  | 0. 27251 | 7. 835510254 | 1  |
| MSTRG. 7606. 1 | 289  | 0. 34855 | 4. 747253418 | 1  |
| MSTRG. 7608. 2 | 248  | 0. 2912  | 9. 120788574 | 1  |
| MSTRG. 7611. 1 | 239  | 0. 40422 | 7. 431335449 | 1  |
| MSTRG. 7617. 2 | 505  | 0. 39252 | 8. 070983887 | 1  |
| MSTRG. 7618. 3 | 241  | 0. 37893 | 10. 11590576 | 1  |
| MSTRG. 7618. 4 | 241  | 0. 40532 | 10. 11590576 | 1  |
| MSTRG. 7619. 3 | 743  | 0. 45073 | 8. 719177246 | 1  |
| MSTRG. 7621. 1 | 208  | 0. 41662 | 10. 00140381 | 1  |
| MSTRG. 7615. 2 | 381  | 0. 38843 | 5. 174621582 | 1  |
| MSTRG. 7615. 1 | 444  | 0. 44029 | 5. 096984863 | 1  |
| MSTRG. 7615. 3 | 381  | 0. 45462 | 5. 174621582 | 1  |
| MSTRG. 7615. 4 | 277  | 0. 41961 | 5. 160583496 | 1  |
| MSTRG. 7615. 5 | 430  | 0. 43716 | 5. 040100098 | 1  |
| MSTRG. 7616. 2 | 53   | 0. 35867 | 8. 840270996 | 1  |
| MSTRG. 7625. 1 | 904  | 0. 44113 | 5. 902282715 | 1  |
| MSTRG. 7625. 2 | 926  | 0. 46885 | 5. 798522949 | 1  |
| MSTRG. 7626. 1 | 170  | 0. 39888 | 8. 81829834  | 1  |
| MSTRG. 7626. 2 | 170  | 0. 40539 | 8. 81829834  | 1  |
| MSTRG. 7630. 2 | 496  | 0. 34486 | 8. 766052246 | 1  |
| MSTRG. 7630. 3 | 1041 | 0. 35782 | 6. 051818848 | 1  |

|                 |      |          |              |    |
|-----------------|------|----------|--------------|----|
| MSTRG. 7632. 3  | 216  | 0. 32442 | 5. 461486816 | 1  |
| MSTRG. 7637. 1  | 303  | 0. 34353 | 10. 62200928 | 1  |
| MSTRG. 7637. 4  | 313  | 0. 36549 | 10. 56695557 | 1  |
| MSTRG. 7637. 5  | 311  | 0. 36322 | 10. 54400635 | 1  |
| MSTRG. 7638. 1  | 460  | 0. 38137 | 6. 589782715 | 1  |
| MSTRG. 7638. 10 | 2350 | 0. 47529 | 5. 859191895 | 1  |
| MSTRG. 7638. 11 | 2192 | 0. 45465 | 5. 875671387 | 1  |
| MSTRG. 7638. 5  | 2350 | 0. 48915 | 5. 798522949 | 1  |
| MSTRG. 7638. 6  | 2351 | 0. 48915 | 5. 798522949 | 1  |
| MSTRG. 7638. 7  | 2378 | 0. 48915 | 5. 812805176 | 1  |
| MSTRG. 7638. 8  | 2323 | 0. 48915 | 5. 845031738 | 1  |
| MSTRG. 7638. 9  | 2099 | 0. 45717 | 5. 886169434 | 1  |
| MSTRG. 7639. 1  | 359  | 0. 4221  | 6. 474914551 | 1  |
| MSTRG. 7638. 12 | 1077 | 0. 36555 | 6. 30267334  | 1  |
| MSTRG. 7640. 2  | 309  | 0. 40989 | 7. 684753418 | 1  |
| MSTRG. 7640. 3  | 181  | 0. 352   | 8. 641296387 | 1  |
| MSTRG. 7642. 1  | 101  | 0. 34981 | 9. 690856934 | 1  |
| MSTRG. 7642. 2  | 220  | 0. 28518 | 10. 06549072 | 1  |
| MSTRG. 7642. 3  | 120  | 0. 28923 | 6. 962097168 | 1  |
| MSTRG. 7642. 4  | 86   | 0. 31516 | 5. 869689941 | 1  |
| MSTRG. 7634. 2  | 312  | 0. 33559 | 8. 19342041  | 1  |
| MSTRG. 7635. 1  | 386  | 0. 33179 | 6. 273620605 | 1  |
| MSTRG. 7635. 2  | 386  | 0. 3328  | 6. 273620605 | 1  |
| MSTRG. 7635. 3  | 386  | 0. 37762 | 6. 273620605 | 1  |
| MSTRG. 7635. 5  | 386  | 0. 28559 | 6. 273620605 | 1  |
| MSTRG. 7636. 1  | 193  | 0. 33194 | 9. 063415527 | 1  |
| MSTRG. 7636. 2  | 188  | 0. 40633 | 9. 857849121 | 1  |
| MSTRG. 7650. 1  | 1410 | 0. 44027 | 6. 054138184 | 1  |
| MSTRG. 7646. 1  | 205  | 0. 37904 | 6. 519592285 | 1  |
| MSTRG. 7647. 1  | 74   | 0. 46904 | 8. 801818848 | -1 |
| MSTRG. 7659. 8  | 290  | 0. 46205 | 4. 971740723 | 1  |
| MSTRG. 7660. 3  | 193  | 0. 37226 | 5. 217102051 | 1  |
| MSTRG. 7660. 5  | 192  | 0. 37694 | 5. 217102051 | 1  |
| MSTRG. 7666. 1  | 1942 | 0. 44236 | 5. 468688965 | 1  |
| MSTRG. 7666. 3  | 1952 | 0. 47705 | 5. 421203613 | 1  |
| MSTRG. 7666. 4  | 1914 | 0. 4627  | 5. 450256348 | 1  |
| MSTRG. 7666. 5  | 1960 | 0. 45001 | 5. 465270996 | 1  |
| MSTRG. 7666. 6  | 163  | 0. 30736 | 6. 027038574 | 1  |
| MSTRG. 7665. 1  | 361  | 0. 36571 | 7. 864440918 | 1  |
| MSTRG. 7668. 2  | 625  | 0. 40856 | 5. 362365723 | 1  |
| MSTRG. 7668. 3  | 642  | 0. 43049 | 5. 256774902 | 1  |
| MSTRG. 7668. 4  | 418  | 0. 43919 | 4. 912658691 | -1 |
| MSTRG. 7673. 1  | 100  | 0. 31615 | 9. 294494629 | 1  |
| MSTRG. 7674. 2  | 144  | 0. 39429 | 10. 1696167  | 1  |
| MSTRG. 7675. 2  | 342  | 0. 44317 | 6. 097106934 | 1  |
| MSTRG. 7680. 1  | 72   | 0. 3631  | 9. 670349121 | 1  |
| MSTRG. 7686. 3  | 188  | 0. 49342 | 6. 432678223 | 1  |
| MSTRG. 7694. 1  | 95   | 0. 37341 | 6. 260681152 | 1  |
| MSTRG. 7705. 5  | 726  | 0. 43771 | 6. 120544434 | 1  |
| MSTRG. 7703. 1  | 573  | 0. 39398 | 12. 2074585  | 1  |
| MSTRG. 7707. 1  | 385  | 0. 4366  | 9. 528381348 | 1  |
| MSTRG. 7707. 3  | 384  | 0. 44113 | 9. 496765137 | 1  |
| MSTRG. 7711. 4  | 165  | 0. 31028 | 9. 066101074 | 1  |
| MSTRG. 7711. 5  | 104  | 0. 31028 | 4. 582946777 | 1  |

|                |      |          |              |    |
|----------------|------|----------|--------------|----|
| MSTRG. 7711. 6 | 138  | 0. 28433 | 6. 858947754 | 1  |
| MSTRG. 7711. 3 | 197  | 0. 31303 | 9. 614685059 | 1  |
| MSTRG. 7711. 1 | 220  | 0. 28305 | 9. 640319824 | 1  |
| MSTRG. 7717. 2 | 346  | 0. 41521 | 9. 019714355 | 1  |
| MSTRG. 7717. 1 | 346  | 0. 39773 | 9. 019714355 | 1  |
| MSTRG. 7717. 3 | 175  | 0. 36796 | 9. 474182129 | 1  |
| MSTRG. 7717. 4 | 175  | 0. 28121 | 9. 474182129 | 1  |
| MSTRG. 7717. 5 | 65   | 0. 39331 | 10. 31329346 | 1  |
| MSTRG. 7717. 8 | 186  | 0. 42287 | 6. 808776855 | 1  |
| MSTRG. 7714. 2 | 561  | 0. 39686 | 6. 202575684 | 1  |
| MSTRG. 7718. 1 | 577  | 0. 41467 | 9. 311828613 | 1  |
| MSTRG. 7722. 2 | 285  | 0. 35101 | 4. 870178223 | 1  |
| MSTRG. 7722. 3 | 261  | 0. 34584 | 5. 750183105 | 1  |
| MSTRG. 7723. 1 | 297  | 0. 28291 | 11. 78399658 | 1  |
| MSTRG. 7722. 5 | 463  | 0. 35173 | 8. 313659668 | 1  |
| MSTRG. 7722. 6 | 285  | 0. 34305 | 4. 870178223 | 1  |
| MSTRG. 7723. 2 | 297  | 0. 27663 | 11. 78399658 | 1  |
| MSTRG. 7730. 5 | 1779 | 0. 35168 | 6. 381896973 | 1  |
| MSTRG. 7730. 6 | 1767 | 0. 2971  | 6. 492858887 | 1  |
| MSTRG. 7731. 1 | 141  | 0. 28584 | 10. 07098389 | 1  |
| MSTRG. 7733. 3 | 678  | 0. 42498 | 4. 894592285 | 1  |
| MSTRG. 7737. 1 | 50   | 0. 30493 | 6. 24017334  | 1  |
| MSTRG. 7738. 1 | 369  | 0. 36401 | 5. 21661377  | 1  |
| MSTRG. 7739. 4 | 69   | 0. 34339 | 9. 096740723 | 1  |
| MSTRG. 7740. 2 | 217  | 0. 4613  | 6. 617492676 | 1  |
| MSTRG. 7742. 2 | 142  | 0. 33285 | 8. 448181152 | 1  |
| MSTRG. 7742. 3 | 64   | 0. 30544 | 9. 409851074 | -1 |
| MSTRG. 7735. 1 | 48   | 0. 34564 | 11. 75726318 | 1  |
| MSTRG. 7744. 2 | 2421 | 0. 47666 | 8. 762756348 | 1  |
| MSTRG. 7745. 1 | 105  | 0. 27433 | 9. 058166504 | 1  |
| MSTRG. 7747. 2 | 706  | 0. 42711 | 6. 22442627  | 1  |
| MSTRG. 7747. 3 | 691  | 0. 42091 | 6. 364929199 | 1  |
| MSTRG. 7747. 4 | 706  | 0. 42091 | 6. 22442627  | 1  |
| MSTRG. 7747. 1 | 706  | 0. 38916 | 6. 22442627  | 1  |
| MSTRG. 7747. 5 | 612  | 0. 37028 | 5. 80657959  | 1  |
| MSTRG. 7751. 3 | 519  | 0. 43793 | 4. 605529785 | 1  |
| MSTRG. 7751. 6 | 509  | 0. 43844 | 4. 435241699 | 1  |
| MSTRG. 7751. 7 | 441  | 0. 45189 | 4. 480895996 | 1  |
| MSTRG. 7751. 8 | 441  | 0. 42417 | 4. 480895996 | 1  |
| MSTRG. 7751. 9 | 481  | 0. 40927 | 4. 48651123  | -1 |
| MSTRG. 7752. 1 | 137  | 0. 29674 | 9. 223937988 | 1  |
| MSTRG. 7752. 2 | 116  | 0. 30939 | 9. 013244629 | 1  |
| MSTRG. 7755. 1 | 284  | 0. 34157 | 5. 321350098 | 1  |
| MSTRG. 7755. 3 | 231  | 0. 32107 | 5. 611755371 | 1  |
| MSTRG. 7743. 1 | 345  | 0. 37391 | 6. 346496582 | 1  |
| MSTRG. 7758. 1 | 45   | 0. 45729 | 4. 856628418 | -1 |
| MSTRG. 7762. 2 | 168  | 0. 3759  | 4. 868469238 | 1  |
| MSTRG. 7760. 2 | 137  | 0. 35045 | 8. 705383301 | 1  |
| MSTRG. 7767. 1 | 52   | 0. 36168 | 9. 694396973 | 1  |
| MSTRG. 7767. 2 | 52   | 0. 38067 | 9. 694396973 | 1  |
| MSTRG. 7769. 2 | 192  | 0. 33733 | 8. 966125488 | 1  |
| MSTRG. 7770. 1 | 126  | 0. 33922 | 11. 27362061 | 1  |
| MSTRG. 7770. 2 | 115  | 0. 39477 | 12. 1461792  | 1  |
| MSTRG. 7771. 4 | 100  | 0. 33901 | 10. 27032471 | 1  |

|                 |     |          |              |    |
|-----------------|-----|----------|--------------|----|
| MSTRG. 7772. 3  | 799 | 0. 39581 | 8. 776184082 | 1  |
| MSTRG. 7773. 2  | 299 | 0. 29705 | 5. 604309082 | 1  |
| MSTRG. 7780. 2  | 60  | 0. 33744 | 9. 787414551 | 1  |
| MSTRG. 7782. 1  | 199 | 0. 37785 | 5. 691467285 | 1  |
| MSTRG. 7782. 2  | 199 | 0. 36341 | 5. 527893066 | -1 |
| MSTRG. 7782. 3  | 199 | 0. 4203  | 5. 527893066 | -1 |
| MSTRG. 7782. 4  | 199 | 0. 32925 | 5. 527893066 | -1 |
| MSTRG. 7782. 5  | 199 | 0. 30396 | 5. 527893066 | -1 |
| MSTRG. 7782. 8  | 115 | 0. 30119 | 10. 15875244 | 1  |
| MSTRG. 7782. 6  | 199 | 0. 32057 | 5. 527893066 | -1 |
| MSTRG. 7782. 7  | 199 | 0. 31477 | 5. 527893066 | -1 |
| MSTRG. 7782. 9  | 199 | 0. 36341 | 5. 527893066 | -1 |
| MSTRG. 7782. 10 | 199 | 0. 36197 | 5. 527893066 | -1 |
| MSTRG. 7782. 12 | 199 | 0. 38195 | 5. 527893066 | -1 |
| MSTRG. 7782. 13 | 199 | 0. 3411  | 5. 527893066 | 1  |
| MSTRG. 7782. 14 | 124 | 0. 43259 | 6. 108703613 | -1 |
| MSTRG. 7783. 1  | 88  | 0. 35912 | 5. 53717041  | -1 |
| MSTRG. 7787. 1  | 104 | 0. 34047 | 9. 858825684 | 1  |
| MSTRG. 7790. 3  | 296 | 0. 37169 | 9. 313415527 | 1  |
| MSTRG. 7791. 1  | 61  | 0. 33118 | 7. 999572754 | 1  |
| MSTRG. 7794. 3  | 83  | 0. 39194 | 4. 92010498  | 1  |
| MSTRG. 7795. 1  | 170 | 0. 29897 | 10. 52545166 | 1  |
| MSTRG. 7796. 3  | 355 | 0. 45431 | 9. 311828613 | 1  |
| MSTRG. 7796. 5  | 355 | 0. 29751 | 9. 311828613 | 1  |
| MSTRG. 7796. 6  | 107 | 0. 27711 | 6. 888000488 | 1  |
| MSTRG. 7796. 7  | 107 | 0. 2933  | 6. 888000488 | 1  |
| MSTRG. 7797. 1  | 109 | 0. 36137 | 10. 13226318 | 1  |
| MSTRG. 7799. 2  | 507 | 0. 3683  | 5. 292419434 | 1  |
| MSTRG. 7800. 1  | 50  | 0. 43161 | 11. 41766357 | 1  |
| MSTRG. 7801. 2  | 101 | 0. 30485 | 9. 096862793 | 1  |
| MSTRG. 7801. 1  | 101 | 0. 30485 | 9. 096862793 | 1  |
| MSTRG. 7803. 1  | 182 | 0. 2968  | 9. 163757324 | 1  |
| MSTRG. 7804. 2  | 149 | 0. 41224 | 6. 169372559 | 1  |
| MSTRG. 7805. 1  | 285 | 0. 39303 | 6. 530090332 | 1  |
| MSTRG. 7805. 3  | 147 | 0. 4399  | 10. 05401611 | 1  |
| MSTRG. 7805. 4  | 159 | 0. 33223 | 10. 04754639 | 1  |
| MSTRG. 7805. 5  | 204 | 0. 37009 | 8. 804016113 | 1  |
| MSTRG. 7809. 1  | 251 | 0. 29777 | 8. 303405762 | 1  |
| MSTRG. 7812. 1  | 132 | 0. 29607 | 9. 932556152 | 1  |
| MSTRG. 7815. 1  | 350 | 0. 45535 | 9. 118713379 | 1  |
| MSTRG. 7815. 3  | 627 | 0. 39946 | 8. 364807129 | 1  |
| MSTRG. 7814. 1  | 260 | 0. 42953 | 5. 661315918 | 1  |
| MSTRG. 7818. 2  | 480 | 0. 4248  | 6. 246520996 | 1  |
| MSTRG. 7818. 3  | 46  | 0. 3653  | 5. 964660645 | 1  |
| MSTRG. 7819. 1  | 87  | 0. 39291 | 8. 678039551 | 1  |
| MSTRG. 7821. 2  | 61  | 0. 37042 | 10. 62286377 | -1 |
| MSTRG. 7825. 2  | 210 | 0. 41296 | 5. 950622559 | 1  |
| MSTRG. 7832. 1  | 152 | 0. 26913 | 8. 07989502  | 1  |
| MSTRG. 7832. 2  | 117 | 0. 27703 | 8. 722106934 | 1  |
| MSTRG. 7840. 1  | 74  | 0. 33367 | 5. 639465332 | 1  |
| MSTRG. 7841. 3  | 346 | 0. 43197 | 5. 772399902 | 1  |
| MSTRG. 7842. 2  | 964 | 0. 46292 | 6. 227722168 | 1  |
| MSTRG. 7843. 2  | 322 | 0. 46843 | 8. 495910645 | 1  |
| MSTRG. 7844. 1  | 321 | 0. 46553 | 4. 710388184 | 1  |



|                 |      |          |              |    |
|-----------------|------|----------|--------------|----|
| MSTRG. 7844. 4  | 99   | 0. 38681 | 5. 870666504 | 1  |
| MSTRG. 7844. 3  | 420  | 0. 42802 | 5. 120300293 | 1  |
| MSTRG. 7844. 5  | 321  | 0. 36684 | 4. 710388184 | 1  |
| MSTRG. 7844. 6  | 321  | 0. 45837 | 4. 710388184 | 1  |
| MSTRG. 7848. 1  | 144  | 0. 32686 | 9. 363098145 | 1  |
| MSTRG. 7848. 2  | 60   | 0. 46179 | 10. 17266846 | -1 |
| MSTRG. 7854. 5  | 166  | 0. 26642 | 11. 74371338 | 1  |
| MSTRG. 7859. 2  | 2340 | 0. 431   | 9. 069885254 | 1  |
| MSTRG. 7859. 3  | 2340 | 0. 40318 | 9. 069885254 | 1  |
| MSTRG. 7859. 1  | 2340 | 0. 40318 | 9. 069885254 | 1  |
| MSTRG. 7859. 4  | 2318 | 0. 40783 | 9. 102844238 | 1  |
| MSTRG. 7859. 8  | 1591 | 0. 43024 | 8. 790466309 | 1  |
| MSTRG. 7859. 9  | 1597 | 0. 4336  | 8. 906433105 | 1  |
| MSTRG. 7859. 7  | 2070 | 0. 42559 | 8. 662536621 | 1  |
| MSTRG. 7859. 5  | 2215 | 0. 35621 | 9. 123718262 | 1  |
| MSTRG. 7859. 6  | 2340 | 0. 42776 | 9. 135681152 | 1  |
| MSTRG. 7859. 10 | 2340 | 0. 42776 | 9. 069885254 | 1  |
| MSTRG. 7859. 11 | 2322 | 0. 42156 | 9. 023742676 | 1  |
| MSTRG. 7859. 12 | 2340 | 0. 43866 | 9. 057067871 | 1  |
| MSTRG. 7860. 1  | 31   | 0. 46923 | 11. 00006104 | 1  |
| MSTRG. 7859. 14 | 70   | 0. 27274 | 7. 86920166  | 1  |
| MSTRG. 7859. 13 | 2322 | 0. 44578 | 9. 051940918 | 1  |
| MSTRG. 7859. 15 | 885  | 0. 45101 | 6. 667907715 | 1  |
| MSTRG. 7859. 16 | 2662 | 0. 46331 | 8. 909729004 | 1  |
| MSTRG. 7863. 1  | 33   | 0. 4575  | 4. 313781738 | 1  |
| MSTRG. 7855. 7  | 295  | 0. 33158 | 8. 373840332 | 1  |
| MSTRG. 7868. 7  | 60   | 0. 28237 | 10. 75445557 | 1  |
| MSTRG. 7870. 1  | 101  | 0. 31123 | 10. 47637939 | 1  |
| MSTRG. 7866. 2  | 270  | 0. 42517 | 8. 510192871 | 1  |
| MSTRG. 7866. 3  | 319  | 0. 40192 | 7. 852233887 | 1  |
| MSTRG. 7874. 1  | 99   | 0. 30451 | 8. 187194824 | 1  |
| MSTRG. 7873. 2  | 151  | 0. 4023  | 6. 062194824 | 1  |
| MSTRG. 7879. 1  | 138  | 0. 28586 | 6. 905456543 | 1  |
| MSTRG. 7878. 1  | 157  | 0. 27379 | 7. 773376465 | 1  |
| MSTRG. 7881. 1  | 133  | 0. 39849 | 8. 438903809 | 1  |
| MSTRG. 7881. 2  | 108  | 0. 33731 | 9. 342956543 | -1 |
| MSTRG. 7884. 1  | 94   | 0. 34261 | 10. 08184814 | 1  |
| MSTRG. 7891. 1  | 56   | 0. 38005 | 6. 498352051 | 1  |
| MSTRG. 7898. 2  | 433  | 0. 42313 | 9. 788391113 | 1  |
| MSTRG. 7889. 1  | 276  | 0. 26545 | 9. 369812012 | 1  |
| MSTRG. 7903. 1  | 939  | 0. 32508 | 9. 481140137 | 1  |
| MSTRG. 7903. 2  | 331  | 0. 29689 | 8. 178649902 | 1  |
| MSTRG. 7903. 3  | 224  | 0. 33086 | 6. 791442871 | 1  |
| MSTRG. 7903. 4  | 305  | 0. 26791 | 6. 925598145 | 1  |
| MSTRG. 7905. 6  | 666  | 0. 38541 | 6. 99005127  | 1  |
| MSTRG. 7905. 7  | 331  | 0. 29857 | 5. 085754395 | 1  |
| MSTRG. 7915. 10 | 282  | 0. 45265 | 4. 938415527 | 1  |
| MSTRG. 7915. 11 | 918  | 0. 44441 | 4. 769104004 | 1  |
| MSTRG. 7915. 5  | 917  | 0. 45007 | 4. 769104004 | 1  |
| MSTRG. 7915. 6  | 907  | 0. 45007 | 4. 784362793 | 1  |
| MSTRG. 7915. 7  | 932  | 0. 45828 | 4. 812927246 | 1  |
| MSTRG. 7915. 9  | 922  | 0. 45828 | 4. 828918457 | 1  |
| MSTRG. 7915. 12 | 394  | 0. 38506 | 5. 368835449 | 1  |
| MSTRG. 7917. 3  | 1889 | 0. 42903 | 6. 949768066 | 1  |

|                 |      |          |              |    |
|-----------------|------|----------|--------------|----|
| MSTRG. 7917. 4  | 1817 | 0. 42903 | 6. 789978027 | 1  |
| MSTRG. 7913. 1  | 88   | 0. 32952 | 10. 60662842 | 1  |
| MSTRG. 7910. 3  | 89   | 0. 45168 | 4. 662658691 | 1  |
| MSTRG. 7921. 1  | 771  | 0. 39665 | 9. 021911621 | 1  |
| MSTRG. 7921. 2  | 771  | 0. 41247 | 9. 021911621 | 1  |
| MSTRG. 7921. 4  | 771  | 0. 43062 | 9. 021911621 | 1  |
| MSTRG. 7923. 1  | 1726 | 0. 43314 | 8. 749206543 | 1  |
| MSTRG. 7923. 2  | 833  | 0. 4051  | 6. 453796387 | 1  |
| MSTRG. 7922. 2  | 321  | 0. 37338 | 9. 352600098 | 1  |
| MSTRG. 7922. 3  | 209  | 0. 36482 | 9. 00592041  | 1  |
| MSTRG. 7926. 2  | 103  | 0. 32827 | 11. 01580811 | 1  |
| MSTRG. 7930. 1  | 155  | 0. 31225 | 8. 946472168 | 1  |
| MSTRG. 7933. 1  | 130  | 0. 41907 | 5. 759216309 | 1  |
| MSTRG. 7933. 2  | 114  | 0. 4181  | 5. 573913574 | 1  |
| MSTRG. 7932. 1  | 17   | 0. 34546 | 8. 189025879 | 1  |
| MSTRG. 7939. 1  | 173  | 0. 35031 | 9. 95135498  | 1  |
| MSTRG. 7939. 2  | 81   | 0. 34134 | 7. 636901855 | 1  |
| MSTRG. 7939. 3  | 81   | 0. 36769 | 7. 636901855 | 1  |
| MSTRG. 7939. 4  | 39   | 0. 37909 | 7. 957702637 | 1  |
| MSTRG. 7935. 2  | 626  | 0. 49807 | 6. 168273926 | 1  |
| MSTRG. 7943. 1  | 61   | 0. 33067 | 8. 885070801 | 1  |
| MSTRG. 7944. 3  | 189  | 0. 33007 | 3. 765075684 | 1  |
| MSTRG. 7944. 4  | 189  | 0. 32878 | 3. 765075684 | 1  |
| MSTRG. 7944. 5  | 301  | 0. 30357 | 6. 308410645 | 1  |
| MSTRG. 7944. 6  | 243  | 0. 3287  | 6. 368347168 | -1 |
| MSTRG. 7945. 1  | 154  | 0. 33919 | 7. 768005371 | 1  |
| MSTRG. 7944. 7  | 124  | 0. 35529 | 8. 435241699 | -1 |
| MSTRG. 7958. 1  | 63   | 0. 41085 | 6. 355529785 | -1 |
| MSTRG. 7962. 1  | 167  | 0. 26512 | 9. 974914551 | 1  |
| MSTRG. 7984. 1  | 69   | 0. 32502 | 7. 794372559 | 1  |
| MSTRG. 7985. 1  | 78   | 0. 4681  | 4. 087219238 | 1  |
| MSTRG. 7990. 1  | 83   | 0. 31903 | 6. 534118652 | 1  |
| MSTRG. 7995. 1  | 318  | 0. 31348 | 9. 824279785 | 1  |
| MSTRG. 7996. 1  | 268  | 0. 32705 | 9. 772155762 | 1  |
| MSTRG. 7996. 2  | 157  | 0. 33914 | 8. 944763184 | 1  |
| MSTRG. 7997. 1  | 111  | 0. 30504 | 6. 137512207 | 1  |
| MSTRG. 7998. 1  | 108  | 0. 29367 | 9. 781555176 | 1  |
| MSTRG. 7988. 15 | 218  | 0. 35933 | 5. 25213623  | 1  |
| MSTRG. 7988. 13 | 271  | 0. 36273 | 5. 223449707 | 1  |
| MSTRG. 7988. 12 | 301  | 0. 43298 | 5. 484924316 | 1  |
| MSTRG. 7988. 14 | 302  | 0. 44767 | 5. 351379395 | 1  |
| MSTRG. 7988. 11 | 823  | 0. 40208 | 5. 727722168 | 1  |
| MSTRG. 7988. 16 | 259  | 0. 42816 | 5. 691345215 | 1  |
| MSTRG. 7988. 18 | 239  | 0. 39972 | 5. 374938965 | 1  |
| MSTRG. 7988. 20 | 128  | 0. 34072 | 8. 242248535 | 1  |
| MSTRG. 7988. 22 | 118  | 0. 3263  | 7. 914611816 | 1  |
| MSTRG. 8002. 1  | 56   | 0. 33754 | 7. 704040527 | 1  |
| MSTRG. 8002. 2  | 77   | 0. 30172 | 6. 993103027 | 1  |
| MSTRG. 8016. 1  | 156  | 0. 34219 | 6. 528381348 | 1  |
| MSTRG. 8019. 1  | 97   | 0. 25564 | 9. 896789551 | 1  |
| MSTRG. 8020. 1  | 1112 | 0. 39699 | 8. 039489746 | 1  |
| MSTRG. 8022. 1  | 40   | 0. 34382 | 4. 830993652 | 1  |
| MSTRG. 8023. 1  | 71   | 0. 28191 | 10. 35369873 | 1  |
| MSTRG. 8020. 4  | 93   | 0. 36815 | 9. 507263184 | -1 |

|                 |      |          |              |    |
|-----------------|------|----------|--------------|----|
| MSTRG. 8020. 5  | 88   | 0. 32905 | 9. 507263184 | -1 |
| MSTRG. 8025. 1  | 170  | 0. 28971 | 10. 21820068 | 1  |
| MSTRG. 8024. 7  | 160  | 0. 29791 | 9. 297790527 | 1  |
| MSTRG. 8026. 1  | 1188 | 0. 37362 | 8. 890075684 | 1  |
| MSTRG. 8027. 1  | 49   | 0. 42291 | 10. 18756104 | -1 |
| MSTRG. 8029. 1  | 1056 | 0. 4296  | 6. 790344238 | 1  |
| MSTRG. 8029. 2  | 1086 | 0. 4532  | 6. 585144043 | 1  |
| MSTRG. 8031. 1  | 120  | 0. 29251 | 10. 19866943 | 1  |
| MSTRG. 8032. 2  | 289  | 0. 38833 | 8. 862487793 | 1  |
| MSTRG. 8010. 1  | 31   | 0. 42196 | 4. 944641113 | 1  |
| MSTRG. 8060. 1  | 146  | 0. 30443 | 8. 679138184 | 1  |
| MSTRG. 8071. 1  | 94   | 0. 45246 | 5. 316223145 | -1 |
| MSTRG. 8074. 1  | 83   | 0. 3823  | 6. 710266113 | 1  |
| MSTRG. 8096. 1  | 2505 | 0. 46119 | 4. 557678223 | 1  |
| MSTRG. 8096. 2  | 1887 | 0. 44877 | 5. 718688965 | 1  |
| MSTRG. 8096. 3  | 1740 | 0. 45409 | 5. 742248535 | 1  |
| MSTRG. 8096. 4  | 1475 | 0. 41114 | 5. 395446777 | 1  |
| MSTRG. 8096. 11 | 1481 | 0. 43992 | 5. 272766113 | 1  |
| MSTRG. 8096. 12 | 1876 | 0. 3694  | 5. 68548584  | 1  |
| MSTRG. 8096. 6  | 1745 | 0. 47254 | 5. 75982666  | 1  |
| MSTRG. 8096. 10 | 1745 | 0. 46179 | 5. 75982666  | 1  |
| MSTRG. 8096. 5  | 1751 | 0. 45409 | 5. 627990723 | 1  |
| MSTRG. 8096. 7  | 1756 | 0. 46179 | 5. 644836426 | 1  |
| MSTRG. 8096. 8  | 1756 | 0. 44759 | 5. 644836426 | 1  |
| MSTRG. 8096. 9  | 1902 | 0. 47254 | 5. 777404785 | 1  |
| MSTRG. 8096. 13 | 1097 | 0. 44849 | 4. 904968262 | 1  |
| MSTRG. 8096. 14 | 1876 | 0. 49071 | 5. 832458496 | 1  |
| MSTRG. 8097. 1  | 65   | 0. 34157 | 7. 725280762 | 1  |
| MSTRG. 8098. 1  | 119  | 0. 29367 | 9. 544372559 | 1  |
| MSTRG. 8098. 2  | 119  | 0. 29367 | 9. 544372559 | 1  |
| MSTRG. 8099. 1  | 119  | 0. 26982 | 6. 686096191 | 1  |
| MSTRG. 8098. 3  | 118  | 0. 28478 | 8. 304016113 | 1  |
| MSTRG. 8100. 1  | 236  | 0. 2921  | 9. 532287598 | 1  |
| MSTRG. 8096. 15 | 174  | 0. 28982 | 9. 40814209  | 1  |
| MSTRG. 8096. 16 | 142  | 0. 2921  | 9. 766174316 | 1  |
| MSTRG. 8096. 17 | 142  | 0. 2921  | 9. 766174316 | 1  |
| MSTRG. 8096. 18 | 142  | 0. 2921  | 9. 766174316 | 1  |
| MSTRG. 8096. 19 | 120  | 0. 27234 | 6. 181213379 | 1  |
| MSTRG. 8096. 20 | 93   | 0. 28443 | 7. 77142334  | 1  |
| MSTRG. 8096. 21 | 70   | 0. 27639 | 9. 919250488 | 1  |
| MSTRG. 8096. 22 | 185  | 0. 31035 | 9. 50994873  | 1  |
| MSTRG. 8083. 1  | 183  | 0. 33118 | 10. 57025146 | 1  |
| MSTRG. 8086. 1  | 78   | 0. 36972 | 10. 07611084 | -1 |
| MSTRG. 8103. 1  | 257  | 0. 46233 | 8. 981018066 | 1  |
| MSTRG. 8109. 3  | 248  | 0. 45612 | 6. 72088623  | 1  |
| MSTRG. 8110. 2  | 938  | 0. 44997 | 5. 841003418 | 1  |
| MSTRG. 8110. 4  | 905  | 0. 44997 | 5. 679870605 | 1  |
| MSTRG. 8110. 6  | 1206 | 0. 47178 | 6. 067687988 | 1  |
| MSTRG. 8110. 5  | 969  | 0. 46257 | 7. 039611816 | 1  |
| MSTRG. 8113. 1  | 27   | 0. 36153 | 6. 53302002  | 1  |
| MSTRG. 8119. 1  | 118  | 0. 27651 | 9. 18170166  | 1  |
| MSTRG. 8119. 2  | 129  | 0. 31069 | 9. 389587402 | 1  |
| MSTRG. 8130. 1  | 217  | 0. 33717 | 11. 83905029 | 1  |
| MSTRG. 8131. 3  | 271  | 0. 39159 | 9. 619812012 | 1  |

|                 |      |          |              |    |
|-----------------|------|----------|--------------|----|
| MSTRG. 8131. 4  | 256  | 0. 37207 | 9. 706115723 | 1  |
| MSTRG. 8131. 5  | 314  | 0. 37819 | 9. 534240723 | 1  |
| MSTRG. 8131. 6  | 329  | 0. 41409 | 9. 473571777 | 1  |
| MSTRG. 8131. 7  | 318  | 0. 404   | 9. 425842285 | 1  |
| MSTRG. 8117. 3  | 343  | 0. 44795 | 6. 679138184 | 1  |
| MSTRG. 8143. 1  | 306  | 0. 46588 | 7. 539001465 | 1  |
| MSTRG. 8145. 1  | 51   | 0. 41634 | 9. 511657715 | 1  |
| MSTRG. 8146. 1  | 29   | 0. 37099 | 5. 811340332 | -1 |
| MSTRG. 8147. 2  | 420  | 0. 4633  | 6. 800842285 | 1  |
| MSTRG. 8160. 2  | 41   | 0. 43194 | 10. 36712646 | -1 |
| MSTRG. 8160. 1  | 169  | 0. 29607 | 7. 683044434 | 1  |
| MSTRG. 8160. 3  | 62   | 0. 36227 | 6. 375793457 | 1  |
| MSTRG. 8160. 4  | 169  | 0. 29607 | 7. 683044434 | 1  |
| MSTRG. 8165. 1  | 2661 | 0. 41409 | 5. 455627441 | 1  |
| MSTRG. 8165. 3  | 2565 | 0. 41409 | 5. 382995605 | 1  |
| MSTRG. 8171. 1  | 16   | 0. 34055 | 10. 30621338 | 1  |
| MSTRG. 8171. 2  | 45   | 0. 27911 | 11. 8348999  | 1  |
| MSTRG. 8172. 11 | 104  | 0. 32396 | 9. 029846191 | 1  |
| MSTRG. 8172. 7  | 279  | 0. 41881 | 5. 457336426 | 1  |
| MSTRG. 8172. 6  | 513  | 0. 47687 | 6. 720397949 | 1  |
| MSTRG. 8172. 9  | 513  | 0. 46401 | 6. 720397949 | 1  |
| MSTRG. 8172. 10 | 513  | 0. 44456 | 6. 720397949 | 1  |
| MSTRG. 8172. 5  | 513  | 0. 47687 | 6. 720397949 | 1  |
| MSTRG. 8172. 8  | 279  | 0. 3     | 5. 457336426 | 1  |
| MSTRG. 8172. 4  | 513  | 0. 47861 | 6. 720397949 | 1  |
| MSTRG. 8172. 3  | 513  | 0. 47199 | 6. 720397949 | 1  |
| MSTRG. 8172. 13 | 52   | 0. 35096 | 4. 780456543 | 1  |
| MSTRG. 8172. 12 | 279  | 0. 33257 | 5. 457336426 | 1  |
| MSTRG. 8172. 14 | 213  | 0. 29772 | 9. 602600098 | 1  |
| MSTRG. 8172. 15 | 282  | 0. 34295 | 9. 192565918 | 1  |
| MSTRG. 8185. 2  | 147  | 0. 37065 | 7. 666687012 | 1  |
| MSTRG. 8185. 1  | 147  | 0. 35591 | 7. 666687012 | 1  |
| MSTRG. 8185. 3  | 147  | 0. 35504 | 7. 666687012 | 1  |
| MSTRG. 8195. 1  | 969  | 0. 46632 | 5. 192810059 | 1  |
| MSTRG. 8195. 2  | 968  | 0. 47402 | 5. 192810059 | 1  |
| MSTRG. 8190. 2  | 56   | 0. 35552 | 6. 094787598 | 1  |
| MSTRG. 8198. 1  | 22   | 0. 31696 | 8. 841491699 | -1 |
| MSTRG. 8201. 1  | 184  | 0. 30168 | 10. 03167725 | 1  |
| MSTRG. 8201. 2  | 184  | 0. 31209 | 10. 03167725 | 1  |
| MSTRG. 8202. 1  | 81   | 0. 29772 | 9. 128845215 | 1  |
| MSTRG. 8200. 2  | 413  | 0. 37308 | 5. 907897949 | 1  |
| MSTRG. 8200. 3  | 70   | 0. 33343 | 8. 382751465 | 1  |
| MSTRG. 8203. 1  | 19   | 0. 31393 | 11. 00030518 | 1  |
| MSTRG. 8209. 1  | 47   | 0. 35736 | 9. 25213623  | 1  |
| MSTRG. 8209. 2  | 55   | 0. 37866 | 8. 492736816 | 1  |
| MSTRG. 8210. 1  | 43   | 0. 48697 | 10. 43267822 | -1 |
| MSTRG. 8218. 1  | 776  | 0. 44388 | 8. 667663574 | 1  |
| MSTRG. 8219. 1  | 89   | 0. 46827 | 5. 543518066 | -1 |
| MSTRG. 8224. 3  | 218  | 0. 3373  | 9. 546691895 | 1  |
| MSTRG. 8221. 1  | 39   | 0. 37154 | 8. 27520752  | 1  |
| MSTRG. 8221. 2  | 84   | 0. 43764 | 6. 82611084  | 1  |
| MSTRG. 8238. 1  | 132  | 0. 42822 | 6. 725646973 | 1  |
| MSTRG. 8238. 2  | 132  | 0. 35641 | 6. 725646973 | 1  |
| MSTRG. 8238. 5  | 230  | 0. 38982 | 6. 242370605 | 1  |

|                 |     |          |              |    |
|-----------------|-----|----------|--------------|----|
| MSTRG. 8238. 6  | 212 | 0. 36004 | 5. 993347168 | 1  |
| MSTRG. 8238. 7  | 132 | 0. 37337 | 6. 725646973 | 1  |
| MSTRG. 8238. 8  | 132 | 0. 37896 | 6. 725646973 | 1  |
| MSTRG. 8239. 1  | 94  | 0. 27517 | 8. 289245605 | 1  |
| MSTRG. 8241. 3  | 77  | 0. 30664 | 8. 572814941 | 1  |
| MSTRG. 8241. 2  | 193 | 0. 28142 | 7. 61541748  | 1  |
| MSTRG. 8241. 4  | 219 | 0. 35441 | 4. 605895996 | 1  |
| MSTRG. 8242. 1  | 151 | 0. 29187 | 5. 228942871 | 1  |
| MSTRG. 8241. 5  | 247 | 0. 36005 | 4. 409362793 | 1  |
| MSTRG. 8241. 6  | 319 | 0. 38609 | 4. 721618652 | 1  |
| MSTRG. 8244. 1  | 73  | 0. 36464 | 9. 873474121 | 1  |
| MSTRG. 8241. 7  | 231 | 0. 39021 | 4. 409362793 | 1  |
| MSTRG. 8241. 8  | 165 | 0. 3582  | 4. 785949707 | 1  |
| MSTRG. 8246. 2  | 57  | 0. 37981 | 7. 747741699 | 1  |
| MSTRG. 8246. 6  | 92  | 0. 42111 | 10. 29205322 | 1  |
| MSTRG. 8246. 5  | 364 | 0. 47312 | 5. 301086426 | 1  |
| MSTRG. 8246. 4  | 365 | 0. 46542 | 5. 301086426 | 1  |
| MSTRG. 8248. 1  | 83  | 0. 29967 | 6. 682189941 | 1  |
| MSTRG. 8246. 7  | 124 | 0. 30664 | 4. 809265137 | 1  |
| MSTRG. 8249. 1  | 189 | 0. 38192 | 10. 09527588 | 1  |
| MSTRG. 8255. 1  | 70  | 0. 42399 | 10. 5199585  | -1 |
| MSTRG. 8283. 3  | 595 | 0. 38211 | 8. 695617676 | 1  |
| MSTRG. 8283. 5  | 595 | 0. 37827 | 8. 695617676 | 1  |
| MSTRG. 8283. 6  | 595 | 0. 38676 | 8. 695617676 | 1  |
| MSTRG. 8283. 7  | 479 | 0. 34787 | 8. 601623535 | 1  |
| MSTRG. 8283. 8  | 100 | 0. 47023 | 9. 389953613 | 1  |
| MSTRG. 8283. 9  | 100 | 0. 32948 | 9. 389953613 | 1  |
| MSTRG. 8283. 10 | 60  | 0. 32463 | 6. 724182129 | 1  |
| MSTRG. 8283. 12 | 125 | 0. 28082 | 11. 00006104 | 1  |
| MSTRG. 8283. 13 | 183 | 0. 28334 | 10. 43255615 | 1  |
| MSTRG. 8285. 3  | 975 | 0. 42291 | 5. 550231934 | 1  |
| MSTRG. 8395. 1  | 64  | 0. 4156  | 9. 988098145 | -1 |
| MSTRG. 8397. 1  | 72  | 0. 4517  | 6. 543029785 | 1  |
| MSTRG. 8409. 1  | 105 | 0. 28695 | 6. 895324707 | 1  |
| MSTRG. 8410. 1  | 87  | 0. 40291 | 4. 575012207 | 1  |
| MSTRG. 8411. 1  | 148 | 0. 33514 | 6. 73626709  | 1  |
| MSTRG. 8412. 1  | 63  | 0. 28982 | 5. 637390137 | 1  |
| MSTRG. 8417. 2  | 80  | 0. 29153 | 9. 019958496 | 1  |
| MSTRG. 8419. 1  | 43  | 0. 31692 | 8. 231140137 | 1  |
| MSTRG. 8394. 2  | 108 | 0. 32464 | 4. 374206543 | 1  |
| MSTRG. 8394. 3  | 61  | 0. 34287 | 5. 871520996 | 1  |
| MSTRG. 8420. 1  | 120 | 0. 29594 | 6. 002258301 | 1  |
| MSTRG. 8422. 1  | 110 | 0. 34727 | 8. 981262207 | 1  |
| MSTRG. 8423. 1  | 47  | 0. 31929 | 12. 309021   | 1  |
| MSTRG. 8424. 1  | 154 | 0. 2921  | 5. 286071777 | 1  |
| MSTRG. 8425. 1  | 183 | 0. 34907 | 10. 09356689 | 1  |
| MSTRG. 8394. 4  | 95  | 0. 34162 | 8. 014099121 | 1  |
| MSTRG. 8394. 5  | 109 | 0. 28562 | 6. 499816895 | 1  |
| MSTRG. 8394. 6  | 125 | 0. 2921  | 5. 178649902 | 1  |
| MSTRG. 8394. 7  | 72  | 0. 26785 | 6. 494445801 | 1  |
| MSTRG. 8394. 8  | 50  | 0. 32086 | 4. 290222168 | 1  |
| MSTRG. 8394. 9  | 125 | 0. 31861 | 10. 21307373 | 1  |
| MSTRG. 8282. 1  | 17  | 0. 36139 | 8. 253845215 | 1  |
| MSTRG. 8309. 1  | 797 | 0. 41534 | 7. 640441895 | 1  |

|                 |      |          |              |    |
|-----------------|------|----------|--------------|----|
| MSTRG. 8315. 1  | 85   | 0. 39617 | 6. 515686035 | 1  |
| MSTRG. 8316. 1  | 53   | 0. 25734 | 10. 05450439 | 1  |
| MSTRG. 8315. 2  | 156  | 0. 32237 | 10. 00592041 | 1  |
| MSTRG. 8324. 3  | 41   | 0. 44497 | 3. 409484863 | 1  |
| MSTRG. 8324. 4  | 41   | 0. 46167 | 3. 409484863 | 1  |
| MSTRG. 8333. 2  | 202  | 0. 42714 | 7. 737609863 | 1  |
| MSTRG. 8333. 3  | 153  | 0. 2921  | 6. 050109863 | 1  |
| MSTRG. 8333. 4  | 194  | 0. 2921  | 6. 588928223 | 1  |
| MSTRG. 8333. 5  | 194  | 0. 25541 | 6. 588684082 | 1  |
| MSTRG. 8337. 1  | 60   | 0. 47612 | 6. 706970215 | -1 |
| MSTRG. 8338. 2  | 265  | 0. 37554 | 8. 45880127  | 1  |
| MSTRG. 8346. 2  | 317  | 0. 47681 | 5. 816101074 | 1  |
| MSTRG. 8349. 6  | 61   | 0. 27794 | 4. 677062988 | 1  |
| MSTRG. 8351. 1  | 58   | 0. 37815 | 11. 06878662 | 1  |
| MSTRG. 8351. 5  | 95   | 0. 3208  | 5. 845397949 | 1  |
| MSTRG. 8352. 3  | 946  | 0. 43601 | 5. 537414551 | 1  |
| MSTRG. 8352. 4  | 328  | 0. 44742 | 5. 820495605 | 1  |
| MSTRG. 8353. 1  | 1819 | 0. 38097 | 8. 984924316 | 1  |
| MSTRG. 8353. 2  | 1595 | 0. 3756  | 9. 330993652 | 1  |
| MSTRG. 8353. 4  | 517  | 0. 31678 | 8. 298156738 | 1  |
| MSTRG. 8353. 6  | 517  | 0. 33654 | 8. 298156738 | 1  |
| MSTRG. 8353. 5  | 517  | 0. 37579 | 8. 298156738 | 1  |
| MSTRG. 8353. 7  | 441  | 0. 40445 | 9. 096496582 | 1  |
| MSTRG. 8353. 8  | 441  | 0. 4091  | 9. 096496582 | 1  |
| MSTRG. 8354. 1  | 65   | 0. 32294 | 11. 33477783 | 1  |
| MSTRG. 8355. 1  | 115  | 0. 43012 | 5. 656555176 | 1  |
| MSTRG. 8356. 1  | 69   | 0. 3616  | 9. 61932373  | 1  |
| MSTRG. 8340. 1  | 68   | 0. 38999 | 11. 49932861 | -1 |
| MSTRG. 8343. 1  | 89   | 0. 40345 | 10. 4463501  | -1 |
| MSTRG. 8359. 5  | 248  | 0. 43892 | 9. 694030762 | 1  |
| MSTRG. 8359. 3  | 248  | 0. 33204 | 9. 694030762 | 1  |
| MSTRG. 8359. 4  | 248  | 0. 40309 | 9. 694030762 | 1  |
| MSTRG. 8360. 1  | 26   | 0. 412   | 6. 008850098 | 1  |
| MSTRG. 8365. 1  | 57   | 0. 32886 | 9. 687805176 | 1  |
| MSTRG. 8358. 1  | 45   | 0. 32906 | 6. 704772949 | 1  |
| MSTRG. 8386. 1  | 1124 | 0. 39503 | 8. 699157715 | 1  |
| MSTRG. 8387. 1  | 50   | 0. 42662 | 5. 523498535 | 1  |
| MSTRG. 8392. 1  | 72   | 0. 31061 | 9. 571105957 | 1  |
| MSTRG. 8432. 1  | 132  | 0. 26189 | 6. 20123291  | -1 |
| MSTRG. 8430. 1  | 53   | 0. 35469 | 9. 019592285 | 1  |
| MSTRG. 8444. 1  | 412  | 0. 33728 | 7. 08416748  | 1  |
| MSTRG. 8444. 2  | 412  | 0. 46353 | 7. 08416748  | 1  |
| MSTRG. 8444. 3  | 357  | 0. 42619 | 5. 981750488 | 1  |
| MSTRG. 8444. 7  | 387  | 0. 34338 | 6. 305969238 | 1  |
| MSTRG. 8444. 5  | 487  | 0. 40093 | 6. 509216309 | 1  |
| MSTRG. 8444. 6  | 487  | 0. 42423 | 6. 509216309 | 1  |
| MSTRG. 8444. 8  | 429  | 0. 35822 | 7. 901916504 | 1  |
| MSTRG. 8444. 9  | 429  | 0. 37075 | 7. 901916504 | 1  |
| MSTRG. 8444. 10 | 429  | 0. 38544 | 7. 901916504 | 1  |
| MSTRG. 8444. 11 | 429  | 0. 39385 | 7. 901916504 | 1  |
| MSTRG. 8445. 1  | 808  | 0. 47516 | 5. 364196777 | 1  |
| MSTRG. 8445. 3  | 397  | 0. 39825 | 6. 725036621 | 1  |
| MSTRG. 8437. 1  | 708  | 0. 44538 | 8. 153747559 | 1  |
| MSTRG. 8439. 2  | 55   | 0. 38143 | 6. 480407715 | 1  |

|                 |      |          |              |    |
|-----------------|------|----------|--------------|----|
| MSTRG. 8446. 5  | 486  | 0. 36756 | 8. 429260254 | 1  |
| MSTRG. 8446. 7  | 445  | 0. 43462 | 6. 048522949 | 1  |
| MSTRG. 8460. 1  | 55   | 0. 37863 | 11. 00860596 | -1 |
| MSTRG. 8482. 1  | 919  | 0. 44745 | 6. 23223877  | 1  |
| MSTRG. 8486. 1  | 50   | 0. 33777 | 10. 03668213 | 1  |
| MSTRG. 8488. 1  | 63   | 0. 44732 | 6. 694396973 | 1  |
| MSTRG. 8488. 2  | 41   | 0. 33443 | 5. 709411621 | 1  |
| MSTRG. 8488. 3  | 52   | 0. 36625 | 8. 907653809 | -1 |
| MSTRG. 8488. 4  | 63   | 0. 33334 | 6. 694396973 | 1  |
| MSTRG. 8495. 1  | 52   | 0. 35391 | 9. 445007324 | 1  |
| MSTRG. 8494. 5  | 951  | 0. 44861 | 7. 980285645 | 1  |
| MSTRG. 8493. 1  | 55   | 0. 44559 | 12. 1831665  | -1 |
| MSTRG. 8499. 1  | 346  | 0. 35493 | 9. 43963623  | 1  |
| MSTRG. 8506. 1  | 563  | 0. 32237 | 4. 557556152 | 1  |
| MSTRG. 8507. 1  | 88   | 0. 32445 | 6. 85760498  | 1  |
| MSTRG. 8508. 1  | 136  | 0. 35878 | 10. 88946533 | 1  |
| MSTRG. 8509. 1  | 95   | 0. 35102 | 5. 376281738 | 1  |
| MSTRG. 8512. 2  | 709  | 0. 45097 | 5. 948913574 | 1  |
| MSTRG. 8512. 3  | 742  | 0. 44229 | 6. 172546387 | 1  |
| MSTRG. 8512. 4  | 568  | 0. 45097 | 6. 515319824 | 1  |
| MSTRG. 8502. 3  | 1004 | 0. 41574 | 9. 277282715 | 1  |
| MSTRG. 8515. 3  | 192  | 0. 37894 | 9. 96295166  | 1  |
| MSTRG. 8517. 2  | 242  | 0. 4724  | 8. 467590332 | 1  |
| MSTRG. 8520. 1  | 128  | 0. 34788 | 7. 66998291  | 1  |
| MSTRG. 8521. 1  | 121  | 0. 3614  | 11. 2822876  | 1  |
| MSTRG. 8522. 1  | 40   | 0. 37213 | 3. 293762207 | 1  |
| MSTRG. 8524. 1  | 155  | 0. 32181 | 9. 666564941 | 1  |
| MSTRG. 8526. 2  | 1291 | 0. 43668 | 8. 077941895 | 1  |
| MSTRG. 8527. 1  | 187  | 0. 33827 | 6. 110778809 | 1  |
| MSTRG. 8526. 3  | 88   | 0. 4439  | 4. 466369629 | -1 |
| MSTRG. 8528. 1  | 98   | 0. 35979 | 9. 877624512 | 1  |
| MSTRG. 8529. 1  | 1767 | 0. 49139 | 5. 031921387 | 1  |
| MSTRG. 8529. 2  | 1767 | 0. 45165 | 5. 031921387 | 1  |
| MSTRG. 8529. 3  | 1688 | 0. 45935 | 5. 051818848 | 1  |
| MSTRG. 8529. 4  | 1767 | 0. 4443  | 5. 031921387 | 1  |
| MSTRG. 8529. 5  | 1767 | 0. 46863 | 5. 031921387 | 1  |
| MSTRG. 8529. 7  | 1767 | 0. 45165 | 5. 031921387 | 1  |
| MSTRG. 8534. 9  | 522  | 0. 42964 | 5. 94317627  | 1  |
| MSTRG. 8534. 10 | 591  | 0. 40666 | 7. 557067871 | 1  |
| MSTRG. 8534. 11 | 590  | 0. 46044 | 7. 557067871 | 1  |
| MSTRG. 8536. 1  | 129  | 0. 28683 | 4. 942077637 | 1  |
| MSTRG. 8536. 2  | 128  | 0. 32078 | 8. 281433105 | 1  |
| MSTRG. 8538. 5  | 273  | 0. 45905 | 7. 604675293 | -1 |
| MSTRG. 8539. 3  | 736  | 0. 42378 | 5. 658508301 | 1  |
| MSTRG. 8539. 4  | 736  | 0. 40458 | 5. 658508301 | 1  |
| MSTRG. 8539. 5  | 757  | 0. 45375 | 5. 718444824 | 1  |
| MSTRG. 8543. 1  | 60   | 0. 39425 | 5. 836486816 | 1  |
| MSTRG. 8544. 1  | 50   | 0. 32504 | 9. 429992676 | 1  |
| MSTRG. 8542. 2  | 57   | 0. 29368 | 5. 013122559 | 1  |
| MSTRG. 8547. 1  | 181  | 0. 38756 | 10. 01397705 | 1  |
| MSTRG. 8548. 3  | 276  | 0. 33091 | 5. 316345215 | 1  |
| MSTRG. 8548. 2  | 444  | 0. 31137 | 5. 885559082 | 1  |
| MSTRG. 8556. 1  | 89   | 0. 45764 | 6. 695861816 | -1 |
| MSTRG. 8557. 3  | 490  | 0. 3413  | 8. 58770752  | 1  |

|                 |      |          |              |    |
|-----------------|------|----------|--------------|----|
| MSTRG. 8557. 2  | 970  | 0. 3554  | 6. 553039551 | 1  |
| MSTRG. 8557. 5  | 807  | 0. 34515 | 7. 19354248  | 1  |
| MSTRG. 8554. 1  | 54   | 0. 39828 | 9. 696594238 | 1  |
| MSTRG. 8555. 1  | 64   | 0. 36333 | 8. 768493652 | 1  |
| MSTRG. 8565. 1  | 35   | 0. 35757 | 7. 976989746 | 1  |
| MSTRG. 8565. 2  | 57   | 0. 34846 | 4. 698059082 | 1  |
| MSTRG. 8566. 1  | 39   | 0. 3983  | 9. 996154785 | 1  |
| MSTRG. 8566. 2  | 37   | 0. 33231 | 9. 824523926 | 1  |
| MSTRG. 8585. 1  | 72   | 0. 41283 | 9. 991882324 | -1 |
| MSTRG. 8587. 1  | 54   | 0. 43874 | 6. 467346191 | 1  |
| MSTRG. 8589. 1  | 229  | 0. 38062 | 10. 36920166 | 1  |
| MSTRG. 8586. 1  | 160  | 0. 43736 | 10. 6050415  | -1 |
| MSTRG. 8591. 2  | 198  | 0. 366   | 5. 403503418 | 1  |
| MSTRG. 8594. 2  | 1299 | 0. 45384 | 5. 604309082 | 1  |
| MSTRG. 8595. 1  | 92   | 0. 37482 | 4. 734680176 | -1 |
| MSTRG. 8598. 3  | 895  | 0. 46793 | 8. 811218262 | 1  |
| MSTRG. 8598. 4  | 896  | 0. 46793 | 8. 811218262 | 1  |
| MSTRG. 8600. 3  | 467  | 0. 3269  | 10. 12249756 | 1  |
| MSTRG. 8601. 1  | 73   | 0. 35785 | 6. 47052002  | 1  |
| MSTRG. 8604. 1  | 150  | 0. 38947 | 10. 92999268 | 1  |
| MSTRG. 8604. 2  | 33   | 0. 39181 | 7. 999450684 | 1  |
| MSTRG. 8605. 4  | 196  | 0. 46306 | 6. 311828613 | 1  |
| MSTRG. 8605. 8  | 212  | 0. 45207 | 6. 064025879 | 1  |
| MSTRG. 8605. 5  | 189  | 0. 37998 | 7. 012634277 | 1  |
| MSTRG. 8605. 6  | 189  | 0. 29374 | 7. 012634277 | 1  |
| MSTRG. 8606. 3  | 292  | 0. 2921  | 5. 580383301 | 1  |
| MSTRG. 8606. 5  | 226  | 0. 2921  | 5. 613342285 | 1  |
| MSTRG. 8606. 4  | 232  | 0. 2921  | 5. 292541504 | 1  |
| MSTRG. 8608. 1  | 105  | 0. 28802 | 9. 120178223 | 1  |
| MSTRG. 8611. 3  | 450  | 0. 43238 | 9. 031555176 | 1  |
| MSTRG. 8613. 1  | 93   | 0. 30472 | 4. 734802246 | 1  |
| MSTRG. 8617. 1  | 101  | 0. 33167 | 8. 461608887 | 1  |
| MSTRG. 8614. 2  | 93   | 0. 31065 | 9. 582824707 | 1  |
| MSTRG. 8614. 3  | 78   | 0. 41291 | 10. 42279053 | 1  |
| MSTRG. 8624. 10 | 559  | 0. 43308 | 5. 29107666  | 1  |
| MSTRG. 8624. 11 | 553  | 0. 43308 | 5. 298034668 | 1  |
| MSTRG. 8624. 12 | 553  | 0. 46029 | 5. 298034668 | 1  |
| MSTRG. 8624. 13 | 567  | 0. 46029 | 5. 29107666  | 1  |
| MSTRG. 8620. 1  | 35   | 0. 37645 | 10. 62957764 | -1 |
| MSTRG. 8629. 1  | 41   | 0. 33864 | 5. 203674316 | 1  |
| MSTRG. 8630. 1  | 213  | 0. 34726 | 9. 189758301 | 1  |
| MSTRG. 8630. 2  | 84   | 0. 28663 | 9. 029602051 | 1  |
| MSTRG. 8632. 1  | 31   | 0. 4516  | 9. 694030762 | 1  |
| MSTRG. 8645. 5  | 719  | 0. 39422 | 6. 506164551 | 1  |
| MSTRG. 8645. 4  | 844  | 0. 40191 | 6. 530578613 | 1  |
| MSTRG. 8645. 6  | 649  | 0. 41123 | 8. 158752441 | 1  |
| MSTRG. 8646. 1  | 115  | 0. 34847 | 6. 956726074 | 1  |
| MSTRG. 8642. 2  | 194  | 0. 42492 | 4. 992980957 | 1  |
| MSTRG. 8647. 1  | 879  | 0. 3966  | 6. 111633301 | 1  |
| MSTRG. 8647. 3  | 879  | 0. 47507 | 6. 111633301 | 1  |
| MSTRG. 8648. 1  | 558  | 0. 36086 | 6. 104797363 | 1  |
| MSTRG. 8650. 2  | 1250 | 0. 46752 | 5. 546691895 | 1  |
| MSTRG. 8650. 1  | 1300 | 0. 44633 | 5. 635925293 | 1  |
| MSTRG. 8650. 4  | 51   | 0. 36323 | 10. 56707764 | 1  |



|                 |      |          |              |    |
|-----------------|------|----------|--------------|----|
| MSTRG. 8650. 3  | 1300 | 0. 44695 | 5. 635925293 | 1  |
| MSTRG. 8656. 3  | 1034 | 0. 47688 | 7. 832824707 | 1  |
| MSTRG. 8657. 1  | 735  | 0. 41423 | 5. 761901855 | 1  |
| MSTRG. 8657. 2  | 735  | 0. 45193 | 5. 761901855 | 1  |
| MSTRG. 8658. 1  | 379  | 0. 31653 | 9. 265441895 | 1  |
| MSTRG. 8658. 3  | 379  | 0. 36801 | 9. 265441895 | 1  |
| MSTRG. 8657. 3  | 735  | 0. 43245 | 5. 761901855 | 1  |
| MSTRG. 8657. 4  | 683  | 0. 43245 | 6. 016784668 | 1  |
| MSTRG. 8657. 6  | 425  | 0. 34103 | 7. 45904541  | 1  |
| MSTRG. 8657. 7  | 425  | 0. 41679 | 7. 45904541  | 1  |
| MSTRG. 8659. 2  | 74   | 0. 27686 | 8. 932678223 | 1  |
| MSTRG. 8660. 2  | 636  | 0. 43894 | 9. 270568848 | 1  |
| MSTRG. 8660. 3  | 476  | 0. 44111 | 9. 644958496 | 1  |
| MSTRG. 8660. 4  | 476  | 0. 40675 | 9. 644958496 | 1  |
| MSTRG. 8660. 10 | 264  | 0. 33686 | 9. 996643066 | 1  |
| MSTRG. 8660. 11 | 476  | 0. 43189 | 9. 644958496 | 1  |
| MSTRG. 8660. 8  | 446  | 0. 46049 | 9. 402160645 | 1  |
| MSTRG. 8660. 9  | 606  | 0. 45229 | 8. 924865723 | 1  |
| MSTRG. 8652. 1  | 457  | 0. 4014  | 9. 589050293 | 1  |
| MSTRG. 8652. 2  | 297  | 0. 34339 | 9. 224914551 | 1  |
| MSTRG. 8674. 2  | 1024 | 0. 46635 | 6. 152648926 | 1  |
| MSTRG. 8674. 1  | 1006 | 0. 46353 | 6. 187072754 | 1  |
| MSTRG. 8674. 3  | 1004 | 0. 44853 | 6. 151916504 | 1  |
| MSTRG. 8674. 4  | 1004 | 0. 46353 | 6. 16973877  | 1  |
| MSTRG. 8674. 8  | 339  | 0. 34922 | 6. 320007324 | 1  |
| MSTRG. 8674. 7  | 1004 | 0. 43047 | 6. 151916504 | 1  |
| MSTRG. 8677. 5  | 76   | 0. 36456 | 9. 031555176 | 1  |
| MSTRG. 8677. 3  | 75   | 0. 38378 | 9. 031555176 | 1  |
| MSTRG. 8677. 4  | 34   | 0. 31977 | 6. 50567627  | 1  |
| MSTRG. 8677. 8  | 76   | 0. 42661 | 6. 516296387 | 1  |
| MSTRG. 8677. 9  | 76   | 0. 42661 | 9. 031555176 | 1  |
| MSTRG. 8677. 10 | 76   | 0. 41606 | 9. 031555176 | 1  |
| MSTRG. 8678. 2  | 446  | 0. 4618  | 9. 471374512 | 1  |
| MSTRG. 8680. 3  | 611  | 0. 4681  | 5. 754943848 | 1  |
| MSTRG. 8680. 2  | 1126 | 0. 47489 | 6. 175476074 | 1  |
| MSTRG. 8686. 1  | 29   | 0. 44012 | 5. 970153809 | 1  |
| MSTRG. 8701. 1  | 1276 | 0. 35567 | 6. 016052246 | 1  |
| MSTRG. 8701. 2  | 1289 | 0. 32389 | 6. 126525879 | 1  |
| MSTRG. 8716. 1  | 471  | 0. 40523 | 6. 036437988 | 1  |
| MSTRG. 8713. 1  | 66   | 0. 41528 | 9. 429260254 | -1 |
| MSTRG. 8732. 1  | 75   | 0. 30474 | 8. 590515137 | 1  |
| MSTRG. 8733. 1  | 36   | 0. 34085 | 9. 098693848 | 1  |
| MSTRG. 8733. 2  | 112  | 0. 34691 | 9. 039245605 | 1  |
| MSTRG. 8733. 3  | 97   | 0. 31432 | 9. 258483887 | 1  |
| MSTRG. 8734. 1  | 1057 | 0. 46679 | 5. 524963379 | 1  |
| MSTRG. 8729. 1  | 131  | 0. 4599  | 4. 461364746 | 1  |
| MSTRG. 8742. 1  | 685  | 0. 45593 | 6. 082946777 | 1  |
| MSTRG. 8742. 3  | 743  | 0. 46531 | 5. 664733887 | 1  |
| MSTRG. 8742. 6  | 551  | 0. 38707 | 4. 996276855 | 1  |
| MSTRG. 8742. 7  | 533  | 0. 38707 | 4. 882751465 | 1  |
| MSTRG. 8742. 8  | 685  | 0. 47394 | 6. 082946777 | 1  |
| MSTRG. 8742. 9  | 667  | 0. 47394 | 5. 86505127  | 1  |
| MSTRG. 8764. 1  | 67   | 0. 31903 | 9. 368103027 | 1  |
| MSTRG. 8765. 1  | 79   | 0. 33128 | 5. 014709473 | 1  |

|                 |      |          |              |    |
|-----------------|------|----------|--------------|----|
| MSTRG. 8765. 2  | 79   | 0. 3208  | 5. 454040527 | 1  |
| MSTRG. 8766. 1  | 113  | 0. 2895  | 9. 70904541  | 1  |
| MSTRG. 8765. 4  | 57   | 0. 38922 | 9. 151062012 | 1  |
| MSTRG. 8748. 4  | 640  | 0. 46378 | 5. 362609863 | 1  |
| MSTRG. 8748. 6  | 564  | 0. 42555 | 5. 645446777 | 1  |
| MSTRG. 8768. 3  | 176  | 0. 29072 | 9. 53717041  | 1  |
| MSTRG. 8769. 1  | 174  | 0. 27234 | 5. 323669434 | 1  |
| MSTRG. 8785. 1  | 186  | 0. 35901 | 9. 812561035 | 1  |
| MSTRG. 8785. 2  | 340  | 0. 40466 | 10. 17010498 | 1  |
| MSTRG. 8785. 3  | 173  | 0. 29772 | 10. 63360596 | 1  |
| MSTRG. 8786. 7  | 2245 | 0. 4688  | 6. 480651855 | 1  |
| MSTRG. 8786. 13 | 2466 | 0. 46408 | 6. 34197998  | 1  |
| MSTRG. 8786. 8  | 2216 | 0. 45874 | 6. 57989502  | 1  |
| MSTRG. 8786. 12 | 2308 | 0. 44848 | 6. 401916504 | 1  |
| MSTRG. 8786. 10 | 2560 | 0. 45871 | 6. 079040527 | 1  |
| MSTRG. 8786. 11 | 1438 | 0. 50273 | 5. 084777832 | 1  |
| MSTRG. 8786. 9  | 2453 | 0. 45    | 6. 316955566 | 1  |
| MSTRG. 8786. 15 | 107  | 0. 31596 | 10. 03118896 | -1 |
| MSTRG. 8787. 1  | 111  | 0. 32477 | 9. 073547363 | 1  |
| MSTRG. 8789. 1  | 247  | 0. 4302  | 8. 415344238 | 1  |
| MSTRG. 8803. 1  | 222  | 0. 31337 | 9. 288513184 | 1  |
| MSTRG. 8808. 2  | 569  | 0. 32082 | 8. 762878418 | 1  |
| MSTRG. 8809. 1  | 449  | 0. 46111 | 5. 272155762 | 1  |
| MSTRG. 8809. 4  | 449  | 0. 44953 | 5. 272155762 | 1  |
| MSTRG. 8818. 3  | 373  | 0. 45945 | 5. 828796387 | 1  |
| MSTRG. 8815. 1  | 74   | 0. 42103 | 9. 994445801 | 1  |
| MSTRG. 8815. 2  | 78   | 0. 33492 | 9. 871520996 | 1  |
| MSTRG. 8815. 3  | 83   | 0. 33087 | 9. 871520996 | 1  |
| MSTRG. 8815. 4  | 69   | 0. 39134 | 9. 994445801 | 1  |
| MSTRG. 8825. 6  | 1061 | 0. 46198 | 6. 089782715 | 1  |
| MSTRG. 8825. 7  | 664  | 0. 43282 | 6. 504943848 | -1 |
| MSTRG. 8825. 8  | 406  | 0. 41331 | 5. 882873535 | 1  |
| MSTRG. 8826. 4  | 1883 | 0. 4439  | 6. 925964355 | 1  |
| MSTRG. 8823. 1  | 67   | 0. 41788 | 9. 381896973 | 1  |
| MSTRG. 8833. 1  | 235  | 0. 44462 | 8. 50592041  | 1  |
| MSTRG. 8833. 2  | 377  | 0. 40903 | 7. 577331543 | 1  |
| MSTRG. 8833. 3  | 345  | 0. 43852 | 9. 210021973 | 1  |
| MSTRG. 8833. 4  | 377  | 0. 39765 | 7. 577331543 | 1  |
| MSTRG. 8833. 5  | 377  | 0. 39294 | 7. 577331543 | 1  |
| MSTRG. 8833. 6  | 377  | 0. 31366 | 7. 577331543 | 1  |
| MSTRG. 8833. 7  | 338  | 0. 37955 | 9. 342834473 | 1  |
| MSTRG. 8833. 8  | 377  | 0. 33595 | 7. 577331543 | 1  |
| MSTRG. 8830. 1  | 83   | 0. 46241 | 11. 39349365 | 1  |
| MSTRG. 8835. 1  | 80   | 0. 29163 | 9. 05670166  | 1  |
| MSTRG. 8836. 1  | 197  | 0. 32061 | 9. 423522949 | 1  |
| MSTRG. 8838. 1  | 197  | 0. 38979 | 8. 855407715 | 1  |
| MSTRG. 8839. 1  | 248  | 0. 41399 | 5. 595153809 | 1  |
| MSTRG. 8842. 1  | 262  | 0. 45725 | 5. 336120605 | 1  |
| MSTRG. 8846. 3  | 1117 | 0. 42267 | 5. 952575684 | 1  |
| MSTRG. 8846. 4  | 1042 | 0. 46112 | 5. 690124512 | 1  |
| MSTRG. 8846. 5  | 1042 | 0. 39524 | 5. 690124512 | 1  |
| MSTRG. 8846. 6  | 1005 | 0. 39524 | 5. 742980957 | 1  |
| MSTRG. 8849. 1  | 16   | 0. 42989 | 9. 006652832 | 1  |
| MSTRG. 8844. 1  | 229  | 0. 44084 | 5. 39642334  | 1  |

|                 |      |          |              |    |
|-----------------|------|----------|--------------|----|
| MSTRG. 8844. 2  | 229  | 0. 3884  | 5. 39642334  | 1  |
| MSTRG. 8853. 1  | 36   | 0. 39806 | 9. 588562012 | 1  |
| MSTRG. 8853. 2  | 40   | 0. 42151 | 11. 00653076 | 1  |
| MSTRG. 8853. 3  | 36   | 0. 38197 | 9. 588562012 | 1  |
| MSTRG. 8853. 4  | 36   | 0. 33481 | 9. 588562012 | 1  |
| MSTRG. 8857. 1  | 38   | 0. 38287 | 7. 768127441 | -1 |
| MSTRG. 8862. 1  | 233  | 0. 43313 | 5. 632385254 | 1  |
| MSTRG. 8862. 2  | 88   | 0. 31849 | 5. 87310791  | 1  |
| MSTRG. 8863. 1  | 183  | 0. 29772 | 5. 969543457 | 1  |
| MSTRG. 8864. 1  | 199  | 0. 32125 | 9. 454162598 | 1  |
| MSTRG. 8865. 1  | 144  | 0. 28301 | 10. 97515869 | 1  |
| MSTRG. 8881. 2  | 183  | 0. 39602 | 5. 112609863 | 1  |
| MSTRG. 8888. 1  | 164  | 0. 29772 | 10. 76568604 | 1  |
| MSTRG. 8893. 1  | 66   | 0. 28338 | 9. 898986816 | 1  |
| MSTRG. 8894. 1  | 148  | 0. 28338 | 5. 506164551 | 1  |
| MSTRG. 8898. 11 | 979  | 0. 43525 | 5. 847473145 | 1  |
| MSTRG. 8898. 12 | 1181 | 0. 48703 | 6. 98223877  | 1  |
| MSTRG. 8898. 13 | 1181 | 0. 45976 | 6. 98223877  | 1  |
| MSTRG. 8902. 1  | 348  | 0. 33887 | 8. 941345215 | 1  |
| MSTRG. 8896. 1  | 109  | 0. 32722 | 6. 062316895 | 1  |
| MSTRG. 8912. 1  | 829  | 0. 44279 | 8. 784362793 | 1  |
| MSTRG. 8912. 2  | 82   | 0. 44587 | 4. 750061035 | 1  |
| MSTRG. 8913. 1  | 89   | 0. 37967 | 9. 586120605 | 1  |
| MSTRG. 8913. 2  | 89   | 0. 38843 | 9. 586120605 | 1  |
| MSTRG. 8914. 1  | 420  | 0. 39495 | 7. 18157959  | 1  |
| MSTRG. 8914. 2  | 403  | 0. 4559  | 6. 440612793 | 1  |
| MSTRG. 8908. 1  | 234  | 0. 36374 | 11. 92242432 | 1  |
| MSTRG. 8916. 1  | 40   | 0. 40313 | 9. 236999512 | 1  |
| MSTRG. 8919. 5  | 3484 | 0. 45542 | 6. 274963379 | 1  |
| MSTRG. 8919. 3  | 3484 | 0. 44492 | 6. 274963379 | 1  |
| MSTRG. 8919. 1  | 3499 | 0. 45162 | 6. 304504395 | 1  |
| MSTRG. 8919. 2  | 3512 | 0. 44697 | 6. 290100098 | 1  |
| MSTRG. 8919. 6  | 3527 | 0. 44697 | 6. 320007324 | 1  |
| MSTRG. 8919. 7  | 3499 | 0. 46064 | 6. 304504395 | 1  |
| MSTRG. 8919. 8  | 3512 | 0. 46083 | 6. 290100098 | 1  |
| MSTRG. 8919. 9  | 3512 | 0. 46083 | 6. 290100098 | 1  |
| MSTRG. 8920. 1  | 35   | 0. 41058 | 7. 899841309 | -1 |
| MSTRG. 8920. 2  | 34   | 0. 4338  | 7. 916931152 | -1 |
| MSTRG. 8918. 2  | 709  | 0. 44712 | 6. 297912598 | 1  |
| MSTRG. 8932. 2  | 426  | 0. 4465  | 6. 387390137 | 1  |
| MSTRG. 8941. 1  | 276  | 0. 31852 | 9. 039001465 | 1  |
| MSTRG. 8943. 1  | 2044 | 0. 41694 | 6. 81439209  | 1  |
| MSTRG. 8943. 2  | 1855 | 0. 41694 | 6. 746520996 | 1  |
| MSTRG. 8943. 3  | 1829 | 0. 44155 | 6. 398498535 | -1 |
| MSTRG. 8943. 4  | 1650 | 0. 44463 | 6. 340759277 | -1 |
| MSTRG. 8943. 5  | 1834 | 0. 44155 | 6. 398620605 | -1 |
| MSTRG. 8943. 6  | 192  | 0. 31197 | 4. 987121582 | 1  |
| MSTRG. 8943. 7  | 1821 | 0. 40826 | 6. 646179199 | 1  |
| MSTRG. 8943. 8  | 2048 | 0. 45516 | 6. 869445801 | -1 |
| MSTRG. 8943. 9  | 1883 | 0. 45516 | 6. 921569824 | 1  |
| MSTRG. 8943. 10 | 1862 | 0. 46336 | 6. 511291504 | -1 |
| MSTRG. 8943. 11 | 1860 | 0. 45721 | 6. 746520996 | 1  |
| MSTRG. 8943. 12 | 1719 | 0. 45597 | 7. 343811035 | -1 |
| MSTRG. 8943. 13 | 1637 | 0. 46165 | 6. 585266113 | 1  |

|                 |      |          |              |    |
|-----------------|------|----------|--------------|----|
| MSTRG. 8923. 1  | 167  | 0. 32654 | 5. 174499512 | 1  |
| MSTRG. 8923. 4  | 208  | 0. 44039 | 5. 754821777 | 1  |
| MSTRG. 8923. 3  | 167  | 0. 35689 | 5. 174499512 | 1  |
| MSTRG. 8924. 1  | 65   | 0. 3516  | 11. 70587158 | 1  |
| MSTRG. 8928. 5  | 480  | 0. 35168 | 7. 09197998  | 1  |
| MSTRG. 8929. 1  | 130  | 0. 30092 | 9. 89251709  | 1  |
| MSTRG. 8949. 1  | 135  | 0. 30308 | 10. 42242432 | 1  |
| MSTRG. 8949. 2  | 66   | 0. 32255 | 4. 622375488 | -1 |
| MSTRG. 8951. 2  | 706  | 0. 4114  | 8. 657043457 | 1  |
| MSTRG. 8952. 1  | 26   | 0. 44436 | 11. 82440186 | 1  |
| MSTRG. 8954. 1  | 110  | 0. 27678 | 9. 556335449 | 1  |
| MSTRG. 8955. 1  | 20   | 0. 35791 | 5. 750793457 | 1  |
| MSTRG. 8957. 1  | 67   | 0. 39218 | 11. 28594971 | 1  |
| MSTRG. 8961. 2  | 109  | 0. 33868 | 9. 492980957 | 1  |
| MSTRG. 8962. 2  | 69   | 0. 34349 | 10. 83953857 | 1  |
| MSTRG. 8962. 3  | 207  | 0. 31361 | 9. 489929199 | 1  |
| MSTRG. 8966. 1  | 91   | 0. 31165 | 10. 0881958  | 1  |
| MSTRG. 8967. 3  | 382  | 0. 46929 | 9. 471862793 | 1  |
| MSTRG. 8971. 2  | 621  | 0. 46306 | 6. 215881348 | 1  |
| MSTRG. 8972. 2  | 1078 | 0. 36761 | 9. 478820801 | 1  |
| MSTRG. 8976. 1  | 51   | 0. 3523  | 5. 715881348 | -1 |
| MSTRG. 8981. 1  | 59   | 0. 40798 | 11. 23065186 | 1  |
| MSTRG. 8994. 1  | 1002 | 0. 36387 | 8. 300476074 | 1  |
| MSTRG. 8994. 6  | 378  | 0. 33381 | 9. 450500488 | 1  |
| MSTRG. 8994. 2  | 716  | 0. 36682 | 6. 549377441 | 1  |
| MSTRG. 8994. 4  | 941  | 0. 36387 | 8. 425598145 | 1  |
| MSTRG. 8994. 7  | 137  | 0. 30191 | 9. 585144043 | 1  |
| MSTRG. 8995. 1  | 83   | 0. 28726 | 11. 49310303 | 1  |
| MSTRG. 8996. 1  | 52   | 0. 37942 | 3. 711853027 | -1 |
| MSTRG. 8996. 2  | 62   | 0. 31638 | 11. 21246338 | -1 |
| MSTRG. 8996. 3  | 33   | 0. 32894 | 4. 677062988 | -1 |
| MSTRG. 9002. 2  | 555  | 0. 43028 | 5. 008972168 | 1  |
| MSTRG. 9000. 2  | 38   | 0. 37571 | 9. 184143066 | 1  |
| MSTRG. 9000. 3  | 553  | 0. 39408 | 8. 517150879 | 1  |
| MSTRG. 9000. 4  | 553  | 0. 36172 | 8. 517150879 | 1  |
| MSTRG. 9003. 2  | 196  | 0. 29452 | 7. 517028809 | 1  |
| MSTRG. 9010. 1  | 676  | 0. 37931 | 6. 653869629 | 1  |
| MSTRG. 9010. 2  | 728  | 0. 35881 | 5. 694763184 | 1  |
| MSTRG. 9010. 3  | 728  | 0. 40459 | 5. 694763184 | 1  |
| MSTRG. 9010. 4  | 728  | 0. 40795 | 5. 694763184 | 1  |
| MSTRG. 9010. 5  | 728  | 0. 4367  | 5. 694763184 | 1  |
| MSTRG. 9010. 6  | 728  | 0. 35297 | 5. 694763184 | 1  |
| MSTRG. 9010. 7  | 728  | 0. 4213  | 5. 694763184 | 1  |
| MSTRG. 9010. 9  | 306  | 0. 28243 | 8. 818664551 | 1  |
| MSTRG. 9010. 10 | 106  | 0. 27739 | 9. 957580566 | 1  |
| MSTRG. 9010. 11 | 97   | 0. 27194 | 11. 36541748 | 1  |
| MSTRG. 9010. 12 | 97   | 0. 26627 | 11. 36541748 | 1  |
| MSTRG. 9010. 13 | 91   | 0. 35284 | 9. 637878418 | -1 |
| MSTRG. 9005. 1  | 79   | 0. 33756 | 6. 796325684 | -1 |
| MSTRG. 9008. 1  | 89   | 0. 36458 | 9. 763122559 | 1  |
| MSTRG. 9011. 1  | 187  | 0. 37    | 6. 604064941 | 1  |
| MSTRG. 9025. 1  | 351  | 0. 47371 | 6. 313903809 | -1 |
| MSTRG. 9027. 2  | 75   | 0. 35419 | 8. 626037598 | 1  |
| MSTRG. 9029. 3  | 189  | 0. 27403 | 12. 02545166 | 1  |

|                 |      |          |              |    |
|-----------------|------|----------|--------------|----|
| MSTRG. 9029. 4  | 1405 | 0. 34799 | 4. 718200684 | 1  |
| MSTRG. 9029. 5  | 140  | 0. 27241 | 8. 57611084  | 1  |
| MSTRG. 9034. 1  | 340  | 0. 42431 | 8. 998962402 | 1  |
| MSTRG. 9034. 2  | 261  | 0. 37011 | 9. 542907715 | 1  |
| MSTRG. 9036. 2  | 157  | 0. 41346 | 6. 53338623  | 1  |
| MSTRG. 9036. 3  | 200  | 0. 44419 | 6. 545227051 | 1  |
| MSTRG. 9038. 1  | 69   | 0. 39486 | 8. 506530762 | 1  |
| MSTRG. 9040. 3  | 730  | 0. 38965 | 8. 921813965 | 1  |
| MSTRG. 9040. 4  | 730  | 0. 46894 | 8. 921813965 | 1  |
| MSTRG. 9041. 1  | 559  | 0. 43872 | 8. 110656738 | 1  |
| MSTRG. 9041. 2  | 473  | 0. 37141 | 8. 261169434 | 1  |
| MSTRG. 9042. 1  | 69   | 0. 37044 | 5. 955871582 | 1  |
| MSTRG. 9042. 2  | 69   | 0. 41253 | 5. 955871582 | 1  |
| MSTRG. 9043. 1  | 44   | 0. 37596 | 10. 7366333  | 1  |
| MSTRG. 9045. 2  | 74   | 0. 39016 | 10. 0479126  | 1  |
| MSTRG. 9046. 2  | 254  | 0. 37842 | 5. 179016113 | 1  |
| MSTRG. 9050. 1  | 488  | 0. 36905 | 6. 480163574 | 1  |
| MSTRG. 9051. 1  | 93   | 0. 28854 | 11. 65875244 | 1  |
| MSTRG. 9053. 3  | 98   | 0. 37055 | 12. 25604248 | 1  |
| MSTRG. 9053. 5  | 97   | 0. 37055 | 12. 25604248 | 1  |
| MSTRG. 9053. 6  | 105  | 0. 28775 | 11. 87542725 | 1  |
| MSTRG. 9053. 4  | 1145 | 0. 3801  | 8. 513366699 | 1  |
| MSTRG. 9053. 7  | 81   | 0. 3328  | 8. 83026123  | 1  |
| MSTRG. 9054. 1  | 118  | 0. 32487 | 5. 457946777 | -1 |
| MSTRG. 9055. 1  | 3185 | 0. 44816 | 5. 95904541  | 1  |
| MSTRG. 9055. 4  | 3017 | 0. 44793 | 5. 841369629 | 1  |
| MSTRG. 9058. 1  | 578  | 0. 424   | 8. 10357666  | 1  |
| MSTRG. 9058. 2  | 486  | 0. 41243 | 8. 384216309 | 1  |
| MSTRG. 9058. 3  | 485  | 0. 3657  | 9. 443786621 | 1  |
| MSTRG. 9058. 4  | 325  | 0. 32749 | 9. 130554199 | 1  |
| MSTRG. 9058. 8  | 372  | 0. 31981 | 9. 172058105 | -1 |
| MSTRG. 9058. 10 | 317  | 0. 3678  | 9. 002380371 | 1  |
| MSTRG. 9058. 11 | 532  | 0. 41556 | 7. 957580566 | 1  |
| MSTRG. 9058. 5  | 357  | 0. 39942 | 9. 374328613 | 1  |
| MSTRG. 9058. 6  | 456  | 0. 42724 | 8. 77166748  | 1  |
| MSTRG. 9058. 7  | 416  | 0. 40277 | 9. 233459473 | -1 |
| MSTRG. 9058. 9  | 548  | 0. 43925 | 8. 106018066 | 1  |
| MSTRG. 9058. 12 | 456  | 0. 42413 | 8. 77166748  | 1  |
| MSTRG. 9058. 14 | 567  | 0. 39066 | 7. 639587402 | 1  |
| MSTRG. 9059. 3  | 67   | 0. 39702 | 12. 37322998 | 1  |
| MSTRG. 9059. 2  | 675  | 0. 39961 | 5. 453430176 | 1  |
| MSTRG. 9062. 6  | 627  | 0. 40011 | 6. 161437988 | 1  |
| MSTRG. 9056. 2  | 175  | 0. 30463 | 9. 259338379 | 1  |
| MSTRG. 9081. 6  | 89   | 0. 31734 | 12. 00042725 | 1  |
| MSTRG. 9081. 7  | 1420 | 0. 4941  | 6. 145202637 | 1  |
| MSTRG. 9081. 5  | 1070 | 0. 3665  | 6. 282165527 | 1  |
| MSTRG. 9081. 3  | 1419 | 0. 48422 | 6. 145202637 | 1  |
| MSTRG. 9081. 1  | 1419 | 0. 4864  | 6. 145202637 | 1  |
| MSTRG. 9081. 4  | 1419 | 0. 49038 | 6. 145202637 | 1  |
| MSTRG. 9081. 8  | 1433 | 0. 4555  | 6. 145202637 | 1  |
| MSTRG. 9081. 9  | 1379 | 0. 47393 | 6. 074768066 | 1  |
| MSTRG. 9081. 10 | 760  | 0. 3736  | 8. 097229004 | 1  |
| MSTRG. 9081. 11 | 282  | 0. 31203 | 4. 625183105 | 1  |
| MSTRG. 9081. 12 | 209  | 0. 25717 | 12. 00115967 | -1 |

|                 |      |          |              |    |
|-----------------|------|----------|--------------|----|
| MSTRG. 9082. 1  | 373  | 0. 28002 | 8. 821350098 | 1  |
| MSTRG. 9082. 2  | 181  | 0. 34558 | 8. 892883301 | 1  |
| MSTRG. 9083. 1  | 112  | 0. 39089 | 9. 071716309 | 1  |
| MSTRG. 9084. 1  | 194  | 0. 27883 | 10. 42315674 | 1  |
| MSTRG. 9083. 10 | 186  | 0. 334   | 7. 578918457 | 1  |
| MSTRG. 9083. 12 | 186  | 0. 334   | 7. 578918457 | 1  |
| MSTRG. 9083. 13 | 186  | 0. 334   | 7. 578918457 | 1  |
| MSTRG. 9083. 15 | 186  | 0. 31829 | 7. 578918457 | 1  |
| MSTRG. 9083. 9  | 186  | 0. 32265 | 7. 578918457 | 1  |
| MSTRG. 9083. 4  | 186  | 0. 31829 | 7. 578918457 | 1  |
| MSTRG. 9083. 8  | 186  | 0. 334   | 7. 578918457 | 1  |
| MSTRG. 9083. 7  | 186  | 0. 32918 | 7. 578918457 | 1  |
| MSTRG. 9083. 16 | 74   | 0. 31581 | 10. 62286377 | 1  |
| MSTRG. 9085. 2  | 74   | 0. 38518 | 6. 501525879 | 1  |
| MSTRG. 9072. 1  | 83   | 0. 41195 | 12. 5647583  | 1  |
| MSTRG. 9075. 2  | 112  | 0. 33451 | 5. 461853027 | 1  |
| MSTRG. 9089. 1  | 161  | 0. 34726 | 12. 06231689 | 1  |
| MSTRG. 9090. 2  | 398  | 0. 46535 | 9. 829650879 | 1  |
| MSTRG. 9090. 3  | 476  | 0. 43033 | 9. 183410645 | 1  |
| MSTRG. 9091. 4  | 1335 | 0. 44331 | 9. 009094238 | -1 |
| MSTRG. 9091. 5  | 638  | 0. 3255  | 9. 612976074 | 1  |
| MSTRG. 9091. 6  | 638  | 0. 32085 | 9. 612976074 | 1  |
| MSTRG. 9091. 8  | 209  | 0. 28015 | 9. 188415527 | 1  |
| MSTRG. 9092. 1  | 179  | 0. 30465 | 6. 877624512 | 1  |
| MSTRG. 9093. 4  | 810  | 0. 42472 | 4. 942810059 | 1  |
| MSTRG. 9094. 2  | 311  | 0. 41163 | 8. 281188965 | 1  |
| MSTRG. 9097. 1  | 268  | 0. 24332 | 9. 422668457 | 1  |
| MSTRG. 9097. 2  | 46   | 0. 30161 | 9. 175964355 | 1  |
| MSTRG. 9103. 5  | 676  | 0. 34617 | 6. 031677246 | 1  |
| MSTRG. 9103. 2  | 676  | 0. 33148 | 6. 031677246 | 1  |
| MSTRG. 9104. 3  | 348  | 0. 43323 | 8. 831604004 | 1  |
| MSTRG. 9104. 4  | 348  | 0. 48358 | 8. 831604004 | 1  |
| MSTRG. 9104. 5  | 348  | 0. 46474 | 8. 831604004 | 1  |
| MSTRG. 9104. 7  | 348  | 0. 46206 | 8. 831604004 | 1  |
| MSTRG. 9104. 6  | 348  | 0. 47079 | 8. 831604004 | 1  |
| MSTRG. 9104. 8  | 338  | 0. 2501  | 8. 929992676 | 1  |
| MSTRG. 9100. 2  | 58   | 0. 34339 | 9. 617492676 | 1  |
| MSTRG. 9107. 8  | 430  | 0. 44854 | 6. 167785645 | 1  |
| MSTRG. 9107. 6  | 430  | 0. 41705 | 6. 167785645 | 1  |
| MSTRG. 9108. 1  | 88   | 0. 35244 | 11. 32647705 | 1  |
| MSTRG. 9111. 1  | 59   | 0. 39585 | 9. 669006348 | 1  |
| MSTRG. 9112. 2  | 231  | 0. 40301 | 10. 62469482 | 1  |
| MSTRG. 9113. 1  | 130  | 0. 34627 | 10. 95245361 | 1  |
| MSTRG. 9110. 1  | 100  | 0. 35786 | 7. 023132324 | -1 |
| MSTRG. 9116. 3  | 596  | 0. 40578 | 8. 942199707 | 1  |
| MSTRG. 9125. 6  | 291  | 0. 39893 | 6. 746398926 | 1  |
| MSTRG. 9125. 2  | 251  | 0. 3926  | 8. 879333496 | 1  |
| MSTRG. 9125. 3  | 491  | 0. 42672 | 6. 425231934 | 1  |
| MSTRG. 9125. 4  | 264  | 0. 3926  | 8. 284729004 | 1  |
| MSTRG. 9125. 5  | 272  | 0. 41288 | 8. 540710449 | 1  |
| MSTRG. 9126. 4  | 978  | 0. 38019 | 5. 115905762 | 1  |
| MSTRG. 9127. 1  | 374  | 0. 28813 | 9. 945251465 | 1  |
| MSTRG. 9120. 2  | 242  | 0. 37837 | 8. 535095215 | 1  |
| MSTRG. 9120. 3  | 239  | 0. 27879 | 8. 711975098 | 1  |

|                 |      |          |              |    |
|-----------------|------|----------|--------------|----|
| MSTRG. 9123. 1  | 127  | 0. 46253 | 11. 80267334 | 1  |
| MSTRG. 9123. 2  | 127  | 0. 47455 | 11. 80267334 | 1  |
| MSTRG. 9129. 1  | 106  | 0. 35039 | 10. 94573975 | 1  |
| MSTRG. 9129. 2  | 106  | 0. 37317 | 10. 94573975 | 1  |
| MSTRG. 9128. 1  | 171  | 0. 42462 | 11. 21624756 | 1  |
| MSTRG. 9133. 3  | 456  | 0. 42325 | 7. 611877441 | -1 |
| MSTRG. 9136. 1  | 56   | 0. 37257 | 8. 000793457 | -1 |
| MSTRG. 9138. 1  | 557  | 0. 40364 | 6. 77142334  | 1  |
| MSTRG. 9138. 3  | 557  | 0. 34795 | 6. 77142334  | 1  |
| MSTRG. 9139. 1  | 93   | 0. 4059  | 7. 022521973 | 1  |
| MSTRG. 9138. 4  | 76   | 0. 29755 | 6. 710266113 | -1 |
| MSTRG. 9140. 1  | 226  | 0. 34956 | 9. 55682373  | 1  |
| MSTRG. 9140. 3  | 128  | 0. 35382 | 11. 37469482 | 1  |
| MSTRG. 9142. 1  | 18   | 0. 30727 | 6. 495666504 | 1  |
| MSTRG. 9145. 3  | 675  | 0. 45934 | 7. 596862793 | 1  |
| MSTRG. 9145. 5  | 444  | 0. 46411 | 6. 335021973 | 1  |
| MSTRG. 9145. 2  | 675  | 0. 45564 | 7. 596862793 | 1  |
| MSTRG. 9145. 4  | 607  | 0. 45729 | 6. 82220459  | 1  |
| MSTRG. 9145. 6  | 390  | 0. 44946 | 8. 702209473 | 1  |
| MSTRG. 9147. 1  | 103  | 0. 34755 | 9. 511169434 | 1  |
| MSTRG. 9146. 4  | 275  | 0. 39192 | 5. 26361084  | 1  |
| MSTRG. 9146. 5  | 190  | 0. 35756 | 5. 249938965 | 1  |
| MSTRG. 9144. 3  | 231  | 0. 4513  | 9. 869689941 | 1  |
| MSTRG. 9144. 2  | 301  | 0. 32767 | 9. 702697754 | 1  |
| MSTRG. 9157. 3  | 356  | 0. 3288  | 5. 081848145 | 1  |
| MSTRG. 9157. 4  | 249  | 0. 33886 | 9. 645446777 | 1  |
| MSTRG. 9153. 3  | 593  | 0. 45783 | 4. 483093262 | 1  |
| MSTRG. 9148. 1  | 55   | 0. 30827 | 6. 721984863 | 1  |
| MSTRG. 9150. 1  | 245  | 0. 42386 | 10. 2946167  | 1  |
| MSTRG. 9150. 2  | 244  | 0. 42386 | 10. 2946167  | 1  |
| MSTRG. 9175. 2  | 248  | 0. 44976 | 5. 429138184 | 1  |
| MSTRG. 9175. 4  | 449  | 0. 46583 | 5. 887390137 | 1  |
| MSTRG. 9175. 10 | 238  | 0. 48083 | 5. 429138184 | 1  |
| MSTRG. 9175. 9  | 248  | 0. 4599  | 5. 429138184 | 1  |
| MSTRG. 9175. 8  | 238  | 0. 46155 | 5. 429138184 | 1  |
| MSTRG. 9167. 2  | 1030 | 0. 42833 | 6. 324035645 | 1  |
| MSTRG. 9168. 1  | 109  | 0. 36116 | 8. 237121582 | 1  |
| MSTRG. 9188. 1  | 43   | 0. 33167 | 10. 01239014 | 1  |
| MSTRG. 9190. 1  | 126  | 0. 44002 | 10. 31451416 | 1  |
| MSTRG. 9190. 3  | 126  | 0. 43752 | 10. 31451416 | 1  |
| MSTRG. 9190. 2  | 131  | 0. 46354 | 10. 31451416 | 1  |
| MSTRG. 9194. 1  | 140  | 0. 30373 | 8. 73614502  | 1  |
| MSTRG. 9194. 2  | 101  | 0. 32466 | 11. 07501221 | 1  |
| MSTRG. 9193. 3  | 180  | 0. 27089 | 5. 472351074 | 1  |
| MSTRG. 9202. 1  | 1022 | 0. 46956 | 5. 703796387 | 1  |
| MSTRG. 9203. 1  | 125  | 0. 44477 | 5. 060852051 | -1 |
| MSTRG. 9205. 1  | 1593 | 0. 43615 | 5. 107727051 | -1 |
| MSTRG. 9205. 2  | 358  | 0. 46886 | 5. 682434082 | -1 |
| MSTRG. 9206. 1  | 105  | 0. 34431 | 9. 430969238 | 1  |
| MSTRG. 9209. 2  | 165  | 0. 37567 | 9. 604431152 | 1  |
| MSTRG. 9209. 3  | 287  | 0. 3158  | 9. 668762207 | 1  |
| MSTRG. 9211. 3  | 111  | 0. 40237 | 9. 510681152 | 1  |
| MSTRG. 9211. 4  | 160  | 0. 36901 | 8. 754577637 | 1  |
| MSTRG. 9217. 2  | 164  | 0. 34635 | 6. 382995605 | 1  |

|                 |      |          |              |    |
|-----------------|------|----------|--------------|----|
| MSTRG. 9230. 1  | 58   | 0. 28027 | 9. 235412598 | 1  |
| MSTRG. 9231. 1  | 601  | 0. 4224  | 7. 504333496 | 1  |
| MSTRG. 9231. 3  | 572  | 0. 39241 | 8. 43145752  | 1  |
| MSTRG. 9233. 1  | 351  | 0. 39145 | 9. 688537598 | 1  |
| MSTRG. 9233. 5  | 351  | 0. 39145 | 9. 688537598 | 1  |
| MSTRG. 9235. 3  | 236  | 0. 41479 | 9. 13470459  | 1  |
| MSTRG. 9235. 4  | 273  | 0. 36933 | 9. 636901855 | 1  |
| MSTRG. 9239. 6  | 639  | 0. 34868 | 9. 945373535 | 1  |
| MSTRG. 9239. 9  | 607  | 0. 44584 | 9. 734680176 | 1  |
| MSTRG. 9239. 8  | 614  | 0. 44532 | 9. 820007324 | 1  |
| MSTRG. 9240. 1  | 117  | 0. 35321 | 8. 755065918 | 1  |
| MSTRG. 9249. 4  | 441  | 0. 4109  | 5. 971496582 | 1  |
| MSTRG. 9249. 5  | 468  | 0. 45255 | 5. 57611084  | 1  |
| MSTRG. 9250. 6  | 1096 | 0. 43594 | 6. 022277832 | 1  |
| MSTRG. 9250. 7  | 1096 | 0. 40547 | 6. 022277832 | 1  |
| MSTRG. 9250. 8  | 1096 | 0. 43799 | 6. 022277832 | 1  |
| MSTRG. 9250. 10 | 1096 | 0. 4606  | 6. 022277832 | 1  |
| MSTRG. 9250. 9  | 1082 | 0. 35511 | 6. 071350098 | 1  |
| MSTRG. 9258. 3  | 683  | 0. 3874  | 4. 34967041  | 1  |
| MSTRG. 9258. 5  | 263  | 0. 42087 | 4. 535949707 | 1  |
| MSTRG. 9259. 2  | 567  | 0. 36401 | 5. 422912598 | 1  |
| MSTRG. 9260. 1  | 37   | 0. 34849 | 8. 683532715 | 1  |
| MSTRG. 9260. 2  | 37   | 0. 3974  | 8. 683532715 | 1  |
| MSTRG. 9256. 3  | 296  | 0. 4558  | 5. 942932129 | 1  |
| MSTRG. 9257. 3  | 89   | 0. 38075 | 5. 29901123  | 1  |
| MSTRG. 9264. 2  | 128  | 0. 43031 | 9. 870666504 | 1  |
| MSTRG. 9266. 1  | 176  | 0. 33906 | 4. 941467285 | 1  |
| MSTRG. 9266. 2  | 176  | 0. 34191 | 4. 941467285 | 1  |
| MSTRG. 9266. 3  | 94   | 0. 36877 | 9. 75592041  | 1  |
| MSTRG. 9267. 2  | 467  | 0. 43508 | 5. 188903809 | 1  |
| MSTRG. 9267. 3  | 410  | 0. 4566  | 4. 84564209  | 1  |
| MSTRG. 9268. 2  | 141  | 0. 45457 | 11. 81341553 | 1  |
| MSTRG. 9269. 1  | 83   | 0. 30656 | 12. 47772217 | 1  |
| MSTRG. 9298. 1  | 1549 | 0. 45745 | 10. 04180908 | 1  |
| MSTRG. 9298. 18 | 3583 | 0. 48053 | 9. 521179199 | 1  |
| MSTRG. 9298. 10 | 2162 | 0. 40578 | 9. 527038574 | 1  |
| MSTRG. 9298. 17 | 1417 | 0. 46057 | 9. 617980957 | 1  |
| MSTRG. 9298. 20 | 2515 | 0. 48053 | 9. 505065918 | -1 |
| MSTRG. 9298. 11 | 3757 | 0. 47233 | 9. 481750488 | -1 |
| MSTRG. 9298. 12 | 3613 | 0. 48053 | 9. 487365723 | 1  |
| MSTRG. 9298. 13 | 1523 | 0. 45738 | 10. 04888916 | 1  |
| MSTRG. 9298. 15 | 2409 | 0. 47531 | 8. 871154785 | 1  |
| MSTRG. 9298. 16 | 3659 | 0. 47233 | 9. 453063965 | 1  |
| MSTRG. 9298. 9  | 1549 | 0. 45738 | 10. 04180908 | 1  |
| MSTRG. 9298. 24 | 1196 | 0. 46882 | 9. 708068848 | 1  |
| MSTRG. 9298. 26 | 1358 | 0. 45902 | 9. 511901855 | -1 |
| MSTRG. 9298. 25 | 1060 | 0. 44884 | 10. 19610596 | 1  |
| MSTRG. 9298. 30 | 368  | 0. 4429  | 9. 686950684 | -1 |
| MSTRG. 9298. 31 | 368  | 0. 446   | 9. 686950684 | -1 |
| MSTRG. 9298. 29 | 1874 | 0. 43713 | 9. 460266113 | 1  |
| MSTRG. 9298. 33 | 1549 | 0. 45738 | 10. 04180908 | 1  |
| MSTRG. 9298. 34 | 1523 | 0. 45993 | 10. 04901123 | 1  |
| MSTRG. 9298. 35 | 767  | 0. 44932 | 9. 779846191 | 1  |
| MSTRG. 9298. 36 | 757  | 0. 44932 | 9. 852111816 | 1  |



|                 |      |          |              |    |
|-----------------|------|----------|--------------|----|
| MSTRG. 9278. 2  | 162  | 0. 43978 | 5. 452941895 | 1  |
| MSTRG. 9281. 1  | 100  | 0. 36024 | 8. 739318848 | -1 |
| MSTRG. 9283. 2  | 223  | 0. 44044 | 9. 516540527 | 1  |
| MSTRG. 9284. 1  | 40   | 0. 28536 | 9. 984313965 | 1  |
| MSTRG. 9285. 2  | 186  | 0. 45734 | 10. 82672119 | 1  |
| MSTRG. 9287. 2  | 95   | 0. 32542 | 9. 819641113 | 1  |
| MSTRG. 9290. 1  | 680  | 0. 44239 | 6. 889099121 | 1  |
| MSTRG. 9291. 1  | 899  | 0. 41294 | 5. 814758301 | 1  |
| MSTRG. 9291. 3  | 276  | 0. 31123 | 8. 489562988 | 1  |
| MSTRG. 9295. 1  | 646  | 0. 30898 | 8. 828063965 | 1  |
| MSTRG. 9295. 2  | 646  | 0. 30898 | 8. 828063965 | 1  |
| MSTRG. 9295. 4  | 639  | 0. 3939  | 8. 897644043 | 1  |
| MSTRG. 9296. 1  | 114  | 0. 3736  | 9. 504089355 | 1  |
| MSTRG. 9303. 2  | 114  | 0. 34505 | 9. 536560059 | 1  |
| MSTRG. 9304. 1  | 440  | 0. 43621 | 6. 439025879 | 1  |
| MSTRG. 9305. 2  | 141  | 0. 37457 | 12. 12762451 | 1  |
| MSTRG. 9305. 3  | 55   | 0. 36745 | 7. 810119629 | 1  |
| MSTRG. 9304. 3  | 432  | 0. 45687 | 6. 542297363 | 1  |
| MSTRG. 9306. 1  | 54   | 0. 37633 | 9. 589782715 | 1  |
| MSTRG. 9306. 2  | 31   | 0. 3927  | 8. 885314941 | 1  |
| MSTRG. 9307. 2  | 290  | 0. 4364  | 6. 968566895 | 1  |
| MSTRG. 9308. 4  | 206  | 0. 41997 | 9. 931213379 | 1  |
| MSTRG. 9312. 11 | 2141 | 0. 43411 | 8. 56072998  | 1  |
| MSTRG. 9312. 12 | 2009 | 0. 44436 | 8. 597229004 | 1  |
| MSTRG. 9312. 13 | 2135 | 0. 44436 | 8. 593688965 | 1  |
| MSTRG. 9312. 14 | 2000 | 0. 44436 | 8. 204528809 | 1  |
| MSTRG. 9312. 3  | 2125 | 0. 44436 | 8. 562927246 | 1  |
| MSTRG. 9312. 4  | 2136 | 0. 44436 | 8. 593688965 | 1  |
| MSTRG. 9312. 9  | 2133 | 0. 44436 | 8. 805114746 | 1  |
| MSTRG. 9312. 15 | 2016 | 0. 44436 | 8. 202575684 | 1  |
| MSTRG. 9312. 23 | 370  | 0. 36085 | 8. 953308105 | 1  |
| MSTRG. 9312. 24 | 261  | 0. 26913 | 9. 666320801 | 1  |
| MSTRG. 9312. 25 | 105  | 0. 40625 | 10. 03875732 | -1 |
| MSTRG. 9310. 2  | 1063 | 0. 46034 | 5. 432434082 | 1  |
| MSTRG. 9315. 1  | 315  | 0. 28584 | 9. 580505371 | 1  |
| MSTRG. 9316. 1  | 7    | 0. 37018 | 4. 529724121 | -1 |
| MSTRG. 9315. 3  | 315  | 0. 28584 | 9. 580505371 | 1  |
| MSTRG. 9321. 3  | 160  | 0. 27274 | 11. 1852417  | 1  |
| MSTRG. 9321. 4  | 160  | 0. 27274 | 11. 1852417  | 1  |
| MSTRG. 9322. 1  | 89   | 0. 28014 | 8. 742370605 | 1  |
| MSTRG. 9325. 2  | 105  | 0. 28415 | 8. 818054199 | 1  |
| MSTRG. 9327. 4  | 676  | 0. 39993 | 6. 015075684 | 1  |
| MSTRG. 9335. 3  | 335  | 0. 27217 | 11. 52093506 | 1  |
| MSTRG. 9335. 4  | 119  | 0. 2689  | 10. 230896   | 1  |
| MSTRG. 9333. 2  | 397  | 0. 42206 | 6. 585876465 | 1  |
| MSTRG. 9338. 1  | 151  | 0. 32848 | 10. 39996338 | 1  |
| MSTRG. 9361. 4  | 1095 | 0. 42978 | 9. 356018066 | 1  |
| MSTRG. 9361. 6  | 1092 | 0. 45245 | 9. 41595459  | 1  |
| MSTRG. 9361. 7  | 1073 | 0. 45245 | 9. 469177246 | 1  |
| MSTRG. 9361. 8  | 983  | 0. 40361 | 9. 535583496 | 1  |
| MSTRG. 9361. 9  | 968  | 0. 40949 | 9. 61138916  | 1  |
| MSTRG. 9361. 10 | 968  | 0. 45497 | 9. 61138916  | 1  |
| MSTRG. 9361. 11 | 968  | 0. 44575 | 9. 61138916  | 1  |
| MSTRG. 9361. 13 | 850  | 0. 43437 | 9. 450378418 | 1  |

|                 |      |          |              |    |
|-----------------|------|----------|--------------|----|
| MSTRG. 9361. 14 | 850  | 0. 44823 | 9. 450378418 | 1  |
| MSTRG. 9365. 1  | 53   | 0. 38408 | 10. 41351318 | 1  |
| MSTRG. 9364. 12 | 184  | 0. 3204  | 10. 34197998 | 1  |
| MSTRG. 9364. 13 | 361  | 0. 33085 | 4. 920593262 | 1  |
| MSTRG. 9367. 2  | 722  | 0. 28862 | 8. 752380371 | 1  |
| MSTRG. 9367. 3  | 1073 | 0. 42944 | 9. 121154785 | 1  |
| MSTRG. 9367. 4  | 1243 | 0. 4467  | 9. 154724121 | 1  |
| MSTRG. 9367. 6  | 928  | 0. 45217 | 8. 92767334  | -1 |
| MSTRG. 9367. 9  | 1001 | 0. 41911 | 8. 941467285 | 1  |
| MSTRG. 9367. 10 | 722  | 0. 35158 | 8. 752380371 | 1  |
| MSTRG. 9368. 1  | 160  | 0. 28883 | 10. 85662842 | 1  |
| MSTRG. 9367. 12 | 967  | 0. 31588 | 8. 92767334  | -1 |
| MSTRG. 9343. 3  | 68   | 0. 34809 | 11. 48675537 | 1  |
| MSTRG. 9349. 1  | 232  | 0. 37371 | 9. 362854004 | 1  |
| MSTRG. 9353. 1  | 90   | 0. 33032 | 9. 063415527 | 1  |
| MSTRG. 9358. 4  | 338  | 0. 37361 | 8. 288269043 | 1  |
| MSTRG. 9358. 1  | 240  | 0. 34553 | 9. 094909668 | 1  |
| MSTRG. 9358. 3  | 240  | 0. 36241 | 9. 094909668 | 1  |
| MSTRG. 9358. 5  | 240  | 0. 36573 | 9. 094909668 | 1  |
| MSTRG. 9358. 6  | 287  | 0. 36683 | 9. 046447754 | 1  |
| MSTRG. 9360. 3  | 498  | 0. 39798 | 5. 671813965 | 1  |
| MSTRG. 9369. 3  | 427  | 0. 42848 | 5. 46685791  | 1  |
| MSTRG. 9369. 4  | 427  | 0. 42848 | 5. 46685791  | 1  |
| MSTRG. 9369. 5  | 253  | 0. 4038  | 5. 921813965 | 1  |
| MSTRG. 9374. 1  | 1467 | 0. 42735 | 6. 070617676 | 1  |
| MSTRG. 9374. 2  | 1599 | 0. 44127 | 6. 968078613 | 1  |
| MSTRG. 9374. 3  | 1436 | 0. 43564 | 6. 732849121 | 1  |
| MSTRG. 9374. 5  | 1431 | 0. 42177 | 6. 733459473 | 1  |
| MSTRG. 9374. 4  | 1485 | 0. 4418  | 7. 13494873  | 1  |
| MSTRG. 9374. 7  | 1296 | 0. 4297  | 6. 355773926 | 1  |
| MSTRG. 9372. 2  | 343  | 0. 36394 | 8. 538635254 | 1  |
| MSTRG. 9372. 3  | 293  | 0. 35788 | 8. 289123535 | 1  |
| MSTRG. 9373. 3  | 129  | 0. 31299 | 4. 158874512 | 1  |
| MSTRG. 9377. 2  | 253  | 0. 44136 | 10. 53289795 | 1  |
| MSTRG. 9386. 6  | 263  | 0. 46048 | 8. 03338623  | -1 |
| MSTRG. 9386. 4  | 975  | 0. 44113 | 5. 958557129 | 1  |
| MSTRG. 9379. 1  | 57   | 0. 32631 | 9. 300231934 | 1  |
| MSTRG. 9382. 1  | 99   | 0. 45689 | 11. 59649658 | 1  |
| MSTRG. 9385. 2  | 400  | 0. 46496 | 8. 020935059 | 1  |
| MSTRG. 9385. 3  | 400  | 0. 45783 | 8. 020935059 | 1  |
| MSTRG. 9396. 1  | 532  | 0. 40408 | 5. 45098877  | 1  |
| MSTRG. 9396. 2  | 532  | 0. 40533 | 5. 45098877  | 1  |
| MSTRG. 9396. 3  | 532  | 0. 39227 | 5. 45098877  | 1  |
| MSTRG. 9398. 4  | 703  | 0. 46414 | 8. 585266113 | 1  |
| MSTRG. 9398. 3  | 676  | 0. 47143 | 7. 945251465 | 1  |
| MSTRG. 9394. 1  | 441  | 0. 34081 | 8. 719421387 | 1  |
| MSTRG. 9394. 2  | 461  | 0. 36205 | 8. 496398926 | 1  |
| MSTRG. 9394. 3  | 433  | 0. 32872 | 8. 770812988 | 1  |
| MSTRG. 9394. 4  | 400  | 0. 37956 | 8. 049499512 | 1  |
| MSTRG. 9393. 1  | 168  | 0. 31441 | 9. 533874512 | 1  |
| MSTRG. 9405. 6  | 131  | 0. 47448 | 5. 519226074 | 1  |
| MSTRG. 9407. 3  | 299  | 0. 44299 | 5. 059265137 | 1  |
| MSTRG. 9410. 1  | 703  | 0. 403   | 5. 281066895 | 1  |
| MSTRG. 9420. 2  | 248  | 0. 43988 | 4. 918762207 | 1  |

|                 |      |          |              |    |
|-----------------|------|----------|--------------|----|
| MSTRG. 9422. 1  | 887  | 0. 42886 | 4. 855041504 | 1  |
| MSTRG. 9422. 4  | 887  | 0. 44015 | 4. 855041504 | 1  |
| MSTRG. 9423. 2  | 369  | 0. 4694  | 5. 096496582 | 1  |
| MSTRG. 9423. 3  | 246  | 0. 45748 | 4. 923278809 | 1  |
| MSTRG. 9423. 4  | 246  | 0. 4759  | 4. 923278809 | 1  |
| MSTRG. 9425. 2  | 134  | 0. 34456 | 4. 457824707 | 1  |
| MSTRG. 9411. 2  | 70   | 0. 46268 | 8. 588562012 | 1  |
| MSTRG. 9413. 2  | 39   | 0. 42648 | 4. 950012207 | -1 |
| MSTRG. 9428. 2  | 385  | 0. 32101 | 9. 332458496 | 1  |
| MSTRG. 9436. 1  | 5474 | 0. 43724 | 5. 058654785 | 1  |
| MSTRG. 9436. 2  | 5830 | 0. 45358 | 5. 129089355 | 1  |
| MSTRG. 9436. 3  | 6300 | 0. 46302 | 5. 343078613 | 1  |
| MSTRG. 9436. 4  | 5718 | 0. 43972 | 5. 140563965 | 1  |
| MSTRG. 9436. 5  | 3344 | 0. 44177 | 5. 39654541  | 1  |
| MSTRG. 9436. 6  | 4041 | 0. 47139 | 5. 73614502  | 1  |
| MSTRG. 9436. 10 | 3047 | 0. 47658 | 5. 953918457 | 1  |
| MSTRG. 9436. 11 | 3158 | 0. 48733 | 5. 917297363 | 1  |
| MSTRG. 9436. 15 | 2433 | 0. 43673 | 5. 527526855 | 1  |
| MSTRG. 9436. 12 | 5922 | 0. 48147 | 5. 403747559 | 1  |
| MSTRG. 9436. 13 | 5100 | 0. 4511  | 5. 233703613 | 1  |
| MSTRG. 9436. 14 | 5504 | 0. 48147 | 5. 492126465 | 1  |
| MSTRG. 9436. 9  | 5225 | 0. 43724 | 5. 200744629 | 1  |
| MSTRG. 9436. 16 | 5474 | 0. 45532 | 5. 058654785 | 1  |
| MSTRG. 9436. 17 | 5315 | 0. 44712 | 5. 04473877  | 1  |
| MSTRG. 9436. 18 | 6556 | 0. 47377 | 5. 309753418 | 1  |
| MSTRG. 9436. 19 | 6444 | 0. 48147 | 5. 324401855 | 1  |
| MSTRG. 9431. 3  | 464  | 0. 35998 | 9. 614318848 | 1  |
| MSTRG. 9431. 4  | 464  | 0. 34475 | 9. 614318848 | 1  |
| MSTRG. 9445. 1  | 322  | 0. 28048 | 9. 118591309 | -1 |
| MSTRG. 9446. 2  | 57   | 0. 28584 | 7. 976257324 | 1  |
| MSTRG. 9446. 3  | 17   | 0. 32839 | 9. 186218262 | 1  |
| MSTRG. 9446. 4  | 81   | 0. 34225 | 9. 93560791  | 1  |
| MSTRG. 9446. 6  | 35   | 0. 34332 | 11. 71258545 | 1  |
| MSTRG. 9449. 1  | 582  | 0. 39263 | 9. 375915527 | 1  |
| MSTRG. 9449. 2  | 124  | 0. 49241 | 5. 572692871 | 1  |
| MSTRG. 9449. 4  | 132  | 0. 34723 | 8. 579284668 | 1  |
| MSTRG. 9449. 3  | 540  | 0. 39965 | 9. 439147949 | 1  |
| MSTRG. 9449. 5  | 32   | 0. 37574 | 7. 976745605 | 1  |
| MSTRG. 9445. 3  | 235  | 0. 2908  | 9. 510437012 | 1  |
| MSTRG. 9445. 4  | 143  | 0. 33433 | 9. 298278809 | 1  |
| MSTRG. 9445. 6  | 87   | 0. 31941 | 12. 01116943 | 1  |
| MSTRG. 9453. 1  | 73   | 0. 34738 | 8. 581359863 | 1  |
| MSTRG. 9453. 2  | 73   | 0. 34251 | 8. 581359863 | 1  |
| MSTRG. 9453. 3  | 73   | 0. 33045 | 8. 581359863 | 1  |
| MSTRG. 9434. 2  | 72   | 0. 33527 | 10. 63983154 | 1  |
| MSTRG. 9437. 2  | 1137 | 0. 42138 | 5. 901550293 | 1  |
| MSTRG. 9441. 1  | 467  | 0. 35982 | 9. 056335449 | 1  |
| MSTRG. 9458. 2  | 1604 | 0. 44484 | 8. 150939941 | 1  |
| MSTRG. 9458. 4  | 1503 | 0. 43397 | 8. 247741699 | 1  |
| MSTRG. 9457. 1  | 366  | 0. 42634 | 6. 717956543 | 1  |
| MSTRG. 9464. 2  | 37   | 0. 36797 | 6. 066589355 | -1 |
| MSTRG. 9464. 1  | 108  | 0. 31802 | 11. 03643799 | 1  |
| MSTRG. 9464. 3  | 104  | 0. 33491 | 11. 27471924 | -1 |
| MSTRG. 9464. 4  | 104  | 0. 43563 | 11. 27471924 | -1 |

|                 |      |          |              |    |
|-----------------|------|----------|--------------|----|
| MSTRG. 9464. 5  | 167  | 0. 431   | 10. 61016846 | -1 |
| MSTRG. 9460. 1  | 438  | 0. 45859 | 5. 55267334  | 1  |
| MSTRG. 9471. 5  | 610  | 0. 41411 | 4. 711486816 | 1  |
| MSTRG. 9471. 6  | 694  | 0. 46381 | 4. 976745605 | 1  |
| MSTRG. 9471. 7  | 587  | 0. 47654 | 4. 686828613 | 1  |
| MSTRG. 9471. 8  | 421  | 0. 46013 | 4. 601501465 | 1  |
| MSTRG. 9473. 1  | 624  | 0. 35297 | 6. 127380371 | 1  |
| MSTRG. 9473. 2  | 587  | 0. 4116  | 6. 193908691 | 1  |
| MSTRG. 9473. 3  | 624  | 0. 35297 | 6. 127380371 | 1  |
| MSTRG. 9473. 4  | 624  | 0. 43189 | 6. 127380371 | 1  |
| MSTRG. 9473. 5  | 624  | 0. 41227 | 6. 127380371 | 1  |
| MSTRG. 9468. 2  | 359  | 0. 385   | 8. 956726074 | 1  |
| MSTRG. 9468. 3  | 262  | 0. 36123 | 6. 380554199 | 1  |
| MSTRG. 9481. 4  | 706  | 0. 42876 | 7. 953063965 | 1  |
| MSTRG. 9481. 11 | 120  | 0. 27654 | 6. 487609863 | 1  |
| MSTRG. 9481. 17 | 706  | 0. 42876 | 7. 953063965 | 1  |
| MSTRG. 9481. 14 | 706  | 0. 42876 | 7. 953063965 | 1  |
| MSTRG. 9481. 15 | 702  | 0. 44161 | 7. 628234863 | 1  |
| MSTRG. 9481. 16 | 702  | 0. 42876 | 7. 628234863 | 1  |
| MSTRG. 9481. 9  | 702  | 0. 42876 | 7. 628234863 | 1  |
| MSTRG. 9481. 10 | 895  | 0. 34816 | 8. 855773926 | 1  |
| MSTRG. 9481. 18 | 564  | 0. 31772 | 9. 548522949 | 1  |
| MSTRG. 9481. 7  | 895  | 0. 37071 | 8. 855773926 | 1  |
| MSTRG. 9477. 2  | 101  | 0. 38304 | 11. 30743408 | 1  |
| MSTRG. 9478. 4  | 248  | 0. 41854 | 8. 362487793 | 1  |
| MSTRG. 9482. 7  | 530  | 0. 43752 | 6. 77947998  | 1  |
| MSTRG. 9484. 1  | 60   | 0. 32807 | 11. 52459717 | 1  |
| MSTRG. 9486. 2  | 306  | 0. 43306 | 6. 13067627  | 1  |
| MSTRG. 9493. 6  | 1003 | 0. 44063 | 5. 664978027 | 1  |
| MSTRG. 9493. 7  | 1002 | 0. 42453 | 5. 664978027 | 1  |
| MSTRG. 9493. 8  | 617  | 0. 403   | 5. 70111084  | 1  |
| MSTRG. 9496. 4  | 1974 | 0. 43958 | 6. 495788574 | 1  |
| MSTRG. 9498. 2  | 320  | 0. 4415  | 5. 790222168 | 1  |
| MSTRG. 9498. 8  | 189  | 0. 38425 | 8. 694274902 | 1  |
| MSTRG. 9499. 1  | 274  | 0. 37744 | 5. 948669434 | 1  |
| MSTRG. 9499. 2  | 252  | 0. 42769 | 8. 290344238 | 1  |
| MSTRG. 9499. 4  | 142  | 0. 40278 | 11. 93048096 | 1  |
| MSTRG. 9499. 5  | 203  | 0. 44196 | 8. 542053223 | 1  |
| MSTRG. 9500. 1  | 343  | 0. 34174 | 9. 636657715 | 1  |
| MSTRG. 9500. 3  | 343  | 0. 36397 | 9. 636657715 | 1  |
| MSTRG. 9500. 4  | 343  | 0. 37783 | 9. 636657715 | 1  |
| MSTRG. 9503. 1  | 533  | 0. 49106 | 4. 358825684 | 1  |
| MSTRG. 9503. 2  | 533  | 0. 48362 | 4. 358825684 | 1  |
| MSTRG. 9503. 3  | 533  | 0. 47261 | 4. 358825684 | 1  |
| MSTRG. 9503. 4  | 582  | 0. 48539 | 4. 391906738 | 1  |
| MSTRG. 9503. 6  | 533  | 0. 4772  | 4. 358825684 | 1  |
| MSTRG. 9505. 2  | 208  | 0. 43289 | 8. 837219238 | 1  |
| MSTRG. 9505. 3  | 377  | 0. 37685 | 5. 888000488 | 1  |
| MSTRG. 9505. 4  | 433  | 0. 44395 | 5. 533996582 | 1  |
| MSTRG. 9505. 5  | 433  | 0. 37008 | 5. 533996582 | 1  |
| MSTRG. 9505. 6  | 433  | 0. 47697 | 5. 533996582 | 1  |
| MSTRG. 9509. 1  | 83   | 0. 33037 | 8. 240539551 | 1  |
| MSTRG. 9509. 3  | 118  | 0. 35909 | 5. 273254395 | -1 |
| MSTRG. 9516. 4  | 883  | 0. 44387 | 7. 606262207 | 1  |

|                |      |          |              |    |
|----------------|------|----------|--------------|----|
| MSTRG. 9516. 6 | 139  | 0. 35421 | 4. 781188965 | 1  |
| MSTRG. 9516. 8 | 61   | 0. 29747 | 9. 182067871 | 1  |
| MSTRG. 9516. 7 | 992  | 0. 46997 | 6. 196350098 | 1  |
| MSTRG. 9518. 2 | 1332 | 0. 44852 | 7. 743591309 | 1  |
| MSTRG. 9518. 3 | 1332 | 0. 43418 | 7. 715393066 | 1  |
| MSTRG. 9522. 1 | 855  | 0. 45498 | 5. 822937012 | 1  |
| MSTRG. 9523. 2 | 67   | 0. 45251 | 6. 297790527 | 1  |
| MSTRG. 9526. 2 | 561  | 0. 44428 | 6. 134460449 | 1  |
| MSTRG. 9532. 1 | 57   | 0. 39341 | 5. 75982666  | 1  |
| MSTRG. 9534. 1 | 466  | 0. 3496  | 8. 961242676 | 1  |
| MSTRG. 9535. 1 | 102  | 0. 3133  | 10. 12030029 | 1  |
| MSTRG. 9535. 2 | 91   | 0. 27327 | 8. 958068848 | 1  |
| MSTRG. 9535. 3 | 189  | 0. 33595 | 9. 367736816 | 1  |
| MSTRG. 9536. 1 | 1619 | 0. 38529 | 4. 686340332 | 1  |
| MSTRG. 9543. 1 | 83   | 0. 35011 | 11. 61077881 | 1  |
| MSTRG. 9543. 2 | 37   | 0. 38784 | 8. 020690918 | 1  |
| MSTRG. 9550. 1 | 65   | 0. 35683 | 4. 589416504 | 1  |
| MSTRG. 9547. 1 | 624  | 0. 35772 | 8. 017272949 | 1  |
| MSTRG. 9554. 1 | 290  | 0. 44225 | 9. 014953613 | -1 |
| MSTRG. 9555. 1 | 57   | 0. 31939 | 8. 057800293 | 1  |
| MSTRG. 9556. 1 | 70   | 0. 31629 | 6. 240905762 | 1  |
| MSTRG. 9556. 2 | 101  | 0. 34243 | 9. 293884277 | 1  |
| MSTRG. 9556. 3 | 68   | 0. 31571 | 6. 240905762 | 1  |
| MSTRG. 9563. 1 | 421  | 0. 45177 | 6. 90826416  | 1  |
| MSTRG. 9563. 2 | 421  | 0. 46598 | 6. 90826416  | 1  |
| MSTRG. 9564. 2 | 547  | 0. 44547 | 5. 265563965 | 1  |
| MSTRG. 9565. 4 | 594  | 0. 42487 | 8. 926696777 | -1 |
| MSTRG. 9565. 5 | 389  | 0. 41554 | 7. 158874512 | 1  |
| MSTRG. 9566. 2 | 235  | 0. 41781 | 6. 477600098 | 1  |
| MSTRG. 9566. 3 | 293  | 0. 38515 | 8. 764221191 | 1  |
| MSTRG. 9574. 3 | 1040 | 0. 39889 | 9. 156799316 | 1  |
| MSTRG. 9574. 4 | 667  | 0. 38665 | 6. 84588623  | 1  |
| MSTRG. 9574. 5 | 703  | 0. 34356 | 6. 898498535 | 1  |
| MSTRG. 9574. 6 | 702  | 0. 36306 | 6. 898498535 | 1  |
| MSTRG. 9574. 7 | 667  | 0. 36836 | 6. 84588623  | 1  |
| MSTRG. 9576. 1 | 517  | 0. 45277 | 6. 663024902 | 1  |
| MSTRG. 9576. 2 | 517  | 0. 46817 | 6. 663024902 | 1  |
| MSTRG. 9576. 3 | 517  | 0. 42928 | 6. 663024902 | 1  |
| MSTRG. 9567. 2 | 73   | 0. 29512 | 5. 733825684 | 1  |
| MSTRG. 9567. 3 | 131  | 0. 36764 | 8. 174865723 | 1  |
| MSTRG. 9567. 4 | 73   | 0. 33455 | 5. 733825684 | 1  |
| MSTRG. 9568. 2 | 140  | 0. 45687 | 9. 230163574 | 1  |
| MSTRG. 9571. 1 | 67   | 0. 39214 | 10. 32305908 | -1 |
| MSTRG. 9577. 4 | 322  | 0. 46606 | 6. 191711426 | 1  |
| MSTRG. 9586. 3 | 444  | 0. 38647 | 4. 711853027 | 1  |
| MSTRG. 9587. 2 | 80   | 0. 35376 | 10. 72589111 | 1  |
| MSTRG. 9589. 3 | 315  | 0. 45189 | 8. 422668457 | 1  |
| MSTRG. 9589. 5 | 363  | 0. 41745 | 5. 270935059 | 1  |
| MSTRG. 9590. 2 | 312  | 0. 35821 | 9. 52154541  | 1  |
| MSTRG. 9590. 3 | 645  | 0. 35244 | 8. 846496582 | 1  |
| MSTRG. 9590. 5 | 288  | 0. 45052 | 5. 027526855 | -1 |
| MSTRG. 9590. 7 | 467  | 0. 37435 | 8. 65057373  | 1  |
| MSTRG. 9590. 6 | 467  | 0. 38279 | 8. 65057373  | 1  |
| MSTRG. 9591. 1 | 764  | 0. 40543 | 5. 90020752  | 1  |

|                 |      |          |              |    |
|-----------------|------|----------|--------------|----|
| MSTRG. 9591. 3  | 850  | 0. 39904 | 6. 194519043 | 1  |
| MSTRG. 9598. 10 | 209  | 0. 29151 | 11. 35223389 | 1  |
| MSTRG. 9598. 3  | 111  | 0. 28283 | 7. 940856934 | 1  |
| MSTRG. 9598. 4  | 111  | 0. 33738 | 7. 940856934 | 1  |
| MSTRG. 9598. 6  | 92   | 0. 32637 | 7. 917053223 | 1  |
| MSTRG. 9598. 7  | 153  | 0. 33767 | 10. 80609131 | 1  |
| MSTRG. 9598. 8  | 92   | 0. 32077 | 7. 917053223 | 1  |
| MSTRG. 9598. 9  | 153  | 0. 33485 | 10. 80609131 | 1  |
| MSTRG. 9599. 1  | 118  | 0. 31496 | 8. 686096191 | 1  |
| MSTRG. 9599. 3  | 118  | 0. 38    | 8. 686096191 | 1  |
| MSTRG. 9599. 4  | 73   | 0. 31579 | 6. 087463379 | 1  |
| MSTRG. 9600. 12 | 450  | 0. 31603 | 10. 05145264 | 1  |
| MSTRG. 9600. 8  | 846  | 0. 46783 | 5. 355529785 | 1  |
| MSTRG. 9600. 13 | 1145 | 0. 44518 | 5. 648498535 | 1  |
| MSTRG. 9600. 7  | 901  | 0. 46599 | 5. 408752441 | 1  |
| MSTRG. 9600. 9  | 901  | 0. 46599 | 5. 408752441 | 1  |
| MSTRG. 9600. 16 | 107  | 0. 35889 | 6. 314025879 | 1  |
| MSTRG. 9602. 2  | 495  | 0. 36516 | 9. 351989746 | 1  |
| MSTRG. 9594. 1  | 335  | 0. 40293 | 7. 971130371 | 1  |
| MSTRG. 9594. 2  | 196  | 0. 3764  | 7. 016662598 | 1  |
| MSTRG. 9594. 3  | 323  | 0. 40994 | 6. 877502441 | 1  |
| MSTRG. 9594. 5  | 359  | 0. 42025 | 7. 597473145 | 1  |
| MSTRG. 9597. 1  | 1116 | 0. 43577 | 6. 965759277 | 1  |
| MSTRG. 9597. 2  | 1082 | 0. 43577 | 6. 471374512 | 1  |
| MSTRG. 9597. 3  | 1116 | 0. 45091 | 6. 965759277 | 1  |
| MSTRG. 9597. 4  | 1082 | 0. 45417 | 6. 471374512 | 1  |
| MSTRG. 9604. 3  | 793  | 0. 44649 | 8. 305358887 | 1  |
| MSTRG. 9604. 4  | 786  | 0. 43435 | 8. 305358887 | 1  |
| MSTRG. 9605. 1  | 56   | 0. 36823 | 6. 801574707 | -1 |
| MSTRG. 9605. 2  | 56   | 0. 30723 | 6. 801574707 | -1 |
| MSTRG. 9606. 1  | 208  | 0. 40703 | 8. 590759277 | 1  |
| MSTRG. 9610. 1  | 47   | 0. 35979 | 6. 230163574 | 1  |
| MSTRG. 9610. 2  | 72   | 0. 41335 | 6. 480773926 | -1 |
| MSTRG. 9612. 2  | 186  | 0. 36764 | 9. 668395996 | 1  |
| MSTRG. 9612. 3  | 186  | 0. 38608 | 9. 668395996 | 1  |
| MSTRG. 9613. 1  | 39   | 0. 40588 | 10. 3883667  | -1 |
| MSTRG. 9612. 4  | 78   | 0. 28578 | 9. 691467285 | 1  |
| MSTRG. 9603. 1  | 82   | 0. 3515  | 7. 998718262 | -1 |
| MSTRG. 9617. 3  | 388  | 0. 4309  | 6. 153015137 | 1  |
| MSTRG. 9619. 2  | 946  | 0. 43995 | 5. 59954834  | 1  |
| MSTRG. 9620. 1  | 183  | 0. 39911 | 8. 836486816 | 1  |
| MSTRG. 9620. 2  | 265  | 0. 46554 | 9. 410217285 | 1  |
| MSTRG. 9624. 3  | 286  | 0. 49415 | 5. 38079834  | 1  |
| MSTRG. 9625. 1  | 146  | 0. 27547 | 8. 272888184 | 1  |
| MSTRG. 9626. 1  | 389  | 0. 42117 | 6. 902770996 | 1  |
| MSTRG. 9626. 2  | 359  | 0. 47225 | 7. 221618652 | 1  |
| MSTRG. 9630. 2  | 470  | 0. 4657  | 5. 325378418 | 1  |
| MSTRG. 9634. 3  | 120  | 0. 29395 | 9. 385803223 | 1  |
| MSTRG. 9634. 4  | 107  | 0. 35064 | 9. 581726074 | 1  |
| MSTRG. 9633. 3  | 138  | 0. 39342 | 9. 672912598 | 1  |
| MSTRG. 9633. 2  | 138  | 0. 39342 | 9. 672912598 | 1  |
| MSTRG. 9638. 1  | 451  | 0. 465   | 6. 221984863 | 1  |
| MSTRG. 9640. 4  | 480  | 0. 40586 | 5. 249694824 | 1  |
| MSTRG. 9649. 4  | 493  | 0. 42896 | 9. 266052246 | 1  |

|                 |      |          |              |    |
|-----------------|------|----------|--------------|----|
| MSTRG. 9643. 1  | 350  | 0. 40849 | 4. 92401123  | 1  |
| MSTRG. 9651. 6  | 284  | 0. 27133 | 6. 59197998  | 1  |
| MSTRG. 9650. 1  | 27   | 0. 4548  | 10. 46124268 | 1  |
| MSTRG. 9653. 1  | 301  | 0. 40663 | 5. 399963379 | 1  |
| MSTRG. 9653. 2  | 343  | 0. 38479 | 5. 409118652 | 1  |
| MSTRG. 9655. 3  | 744  | 0. 47533 | 6. 161071777 | 1  |
| MSTRG. 9657. 1  | 152  | 0. 43817 | 11. 03106689 | -1 |
| MSTRG. 9658. 4  | 468  | 0. 3263  | 8. 994445801 | 1  |
| MSTRG. 9661. 1  | 39   | 0. 32547 | 6. 510314941 | 1  |
| MSTRG. 9662. 4  | 345  | 0. 36264 | 4. 935974121 | 1  |
| MSTRG. 9663. 3  | 314  | 0. 42231 | 6. 077697754 | 1  |
| MSTRG. 9663. 4  | 314  | 0. 42963 | 6. 077697754 | 1  |
| MSTRG. 9665. 1  | 79   | 0. 287   | 8. 937316895 | 1  |
| MSTRG. 9665. 2  | 71   | 0. 287   | 11. 8291626  | 1  |
| MSTRG. 9665. 3  | 71   | 0. 287   | 11. 8291626  | 1  |
| MSTRG. 9665. 5  | 83   | 0. 287   | 11. 36480713 | 1  |
| MSTRG. 9667. 2  | 438  | 0. 32912 | 5. 43548584  | 1  |
| MSTRG. 9667. 3  | 420  | 0. 35439 | 5. 45489502  | 1  |
| MSTRG. 9675. 2  | 124  | 0. 40628 | 5. 274963379 | 1  |
| MSTRG. 9675. 3  | 65   | 0. 47624 | 12. 00042725 | 1  |
| MSTRG. 9675. 4  | 76   | 0. 3941  | 11. 95013428 | 1  |
| MSTRG. 9670. 2  | 212  | 0. 42248 | 12. 22784424 | 1  |
| MSTRG. 9671. 2  | 83   | 0. 39303 | 10. 42681885 | 1  |
| MSTRG. 9676. 2  | 1713 | 0. 44737 | 9. 399597168 | 1  |
| MSTRG. 9676. 3  | 174  | 0. 40174 | 5. 660705566 | 1  |
| MSTRG. 9685. 1  | 59   | 0. 30297 | 8. 294250488 | 1  |
| MSTRG. 9689. 1  | 217  | 0. 3723  | 8. 809020996 | 1  |
| MSTRG. 9689. 3  | 217  | 0. 37695 | 8. 809020996 | 1  |
| MSTRG. 9696. 2  | 702  | 0. 37649 | 6. 343444824 | 1  |
| MSTRG. 9696. 5  | 662  | 0. 45893 | 5. 858093262 | 1  |
| MSTRG. 9692. 1  | 322  | 0. 36906 | 5. 576965332 | 1  |
| MSTRG. 9693. 2  | 101  | 0. 33223 | 12. 38128662 | 1  |
| MSTRG. 9691. 2  | 245  | 0. 30644 | 5. 039978027 | 1  |
| MSTRG. 9706. 1  | 535  | 0. 42226 | 5. 419494629 | 1  |
| MSTRG. 9706. 5  | 533  | 0. 43821 | 5. 417297363 | 1  |
| MSTRG. 9708. 1  | 83   | 0. 30237 | 10. 31671143 | 1  |
| MSTRG. 9719. 1  | 235  | 0. 44151 | 10. 26824951 | 1  |
| MSTRG. 9728. 1  | 109  | 0. 35037 | 9. 894226074 | 1  |
| MSTRG. 9740. 1  | 43   | 0. 39259 | 10. 48040771 | 1  |
| MSTRG. 9742. 1  | 690  | 0. 46253 | 5. 991394043 | 1  |
| MSTRG. 9742. 2  | 697  | 0. 46997 | 6. 129699707 | 1  |
| MSTRG. 9742. 3  | 697  | 0. 45433 | 6. 129699707 | 1  |
| MSTRG. 9742. 4  | 697  | 0. 46253 | 6. 129699707 | 1  |
| MSTRG. 9742. 8  | 697  | 0. 46336 | 6. 129699707 | 1  |
| MSTRG. 9742. 9  | 690  | 0. 46997 | 5. 991394043 | 1  |
| MSTRG. 9742. 13 | 690  | 0. 41793 | 5. 991394043 | 1  |
| MSTRG. 9742. 15 | 393  | 0. 33686 | 6. 432922363 | 1  |
| MSTRG. 9742. 17 | 182  | 0. 41679 | 8. 987976074 | 1  |
| MSTRG. 9742. 18 | 375  | 0. 42236 | 6. 636047363 | 1  |
| MSTRG. 9743. 1  | 181  | 0. 37149 | 9. 039123535 | 1  |
| MSTRG. 9743. 2  | 300  | 0. 44784 | 9. 135070801 | 1  |
| MSTRG. 9745. 1  | 1163 | 0. 41437 | 5. 566589355 | 1  |
| MSTRG. 9745. 3  | 1060 | 0. 39484 | 5. 446716309 | 1  |
| MSTRG. 9745. 6  | 692  | 0. 3503  | 9. 298156738 | 1  |

|                 |      |          |              |    |
|-----------------|------|----------|--------------|----|
| MSTRG. 9732. 2  | 84   | 0. 29751 | 8. 611022949 | 1  |
| MSTRG. 9734. 2  | 37   | 0. 35732 | 9. 809387207 | 1  |
| MSTRG. 9734. 5  | 103  | 0. 45574 | 9. 426940918 | 1  |
| MSTRG. 9734. 4  | 32   | 0. 34821 | 9. 102355957 | 1  |
| MSTRG. 9735. 1  | 119  | 0. 47574 | 6. 574279785 | 1  |
| MSTRG. 9738. 1  | 684  | 0. 40317 | 7. 856506348 | 1  |
| MSTRG. 9747. 1  | 49   | 0. 36324 | 9. 414855957 | 1  |
| MSTRG. 9753. 1  | 99   | 0. 35434 | 5. 311584473 | 1  |
| MSTRG. 9756. 1  | 60   | 0. 37021 | 10. 16595459 | -1 |
| MSTRG. 9760. 1  | 295  | 0. 46547 | 4. 916687012 | 1  |
| MSTRG. 9760. 2  | 294  | 0. 47037 | 4. 952453613 | 1  |
| MSTRG. 9760. 3  | 180  | 0. 46914 | 7. 485412598 | -1 |
| MSTRG. 9773. 1  | 511  | 0. 39298 | 5. 687561035 | 1  |
| MSTRG. 9774. 1  | 433  | 0. 36993 | 7. 596008301 | 1  |
| MSTRG. 9774. 2  | 432  | 0. 39617 | 7. 596008301 | 1  |
| MSTRG. 9774. 4  | 440  | 0. 41667 | 8. 014465332 | 1  |
| MSTRG. 9775. 1  | 152  | 0. 28683 | 10. 85614014 | 1  |
| MSTRG. 9780. 1  | 75   | 0. 38146 | 9. 743225098 | 1  |
| MSTRG. 9798. 1  | 28   | 0. 43173 | 4. 298156738 | -1 |
| MSTRG. 9815. 16 | 46   | 0. 26545 | 9. 493103027 | 1  |
| MSTRG. 9815. 18 | 178  | 0. 28334 | 10. 11749268 | 1  |
| MSTRG. 9815. 19 | 98   | 0. 29292 | 10. 19525146 | 1  |
| MSTRG. 9815. 20 | 185  | 0. 30576 | 9. 083557129 | 1  |
| MSTRG. 9815. 21 | 185  | 0. 3126  | 9. 083557129 | 1  |
| MSTRG. 9816. 1  | 35   | 0. 47637 | 6. 014099121 | -1 |
| MSTRG. 9815. 22 | 85   | 0. 30357 | 7. 81842041  | 1  |
| MSTRG. 9815. 23 | 99   | 0. 30411 | 6. 680603027 | 1  |
| MSTRG. 9815. 24 | 52   | 0. 3249  | 6. 885681152 | 1  |
| MSTRG. 9815. 25 | 112  | 0. 28334 | 10. 50921631 | 1  |
| MSTRG. 9815. 26 | 109  | 0. 28035 | 8. 71282959  | 1  |
| MSTRG. 9815. 27 | 94   | 0. 28083 | 10. 29095459 | 1  |
| MSTRG. 9817. 1  | 151  | 0. 29367 | 10. 09881592 | 1  |
| MSTRG. 9817. 2  | 33   | 0. 38145 | 11. 09698486 | 1  |
| MSTRG. 9811. 1  | 53   | 0. 41074 | 9. 390808105 | 1  |
| MSTRG. 9812. 2  | 414  | 0. 39885 | 9. 29107666  | 1  |
| MSTRG. 9814. 2  | 987  | 0. 4694  | 5. 995788574 | 1  |
| MSTRG. 9827. 1  | 456  | 0. 39142 | 9. 795349121 | 1  |
| MSTRG. 9827. 3  | 108  | 0. 42472 | 9. 536193848 | 1  |
| MSTRG. 9849. 1  | 333  | 0. 31981 | 5. 00189209  | 1  |
| MSTRG. 9854. 3  | 3083 | 0. 45541 | 5. 84161377  | 1  |
| MSTRG. 9858. 2  | 136  | 0. 33794 | 6. 063293457 | 1  |
| MSTRG. 9859. 1  | 335  | 0. 31925 | 9. 572937012 | 1  |
| MSTRG. 9859. 2  | 335  | 0. 31905 | 9. 572937012 | 1  |
| MSTRG. 9862. 1  | 65   | 0. 32485 | 8. 498596191 | 1  |
| MSTRG. 9863. 1  | 70   | 0. 32346 | 4. 956604004 | 1  |
| MSTRG. 9878. 1  | 59   | 0. 32265 | 9. 352355957 | 1  |
| MSTRG. 9884. 1  | 70   | 0. 35264 | 5. 102478027 | 1  |
| MSTRG. 9889. 1  | 84   | 0. 26974 | 10. 14471436 | 1  |
| MSTRG. 9889. 2  | 76   | 0. 28515 | 5. 519470215 | 1  |
| MSTRG. 9890. 3  | 306  | 0. 38423 | 5. 600158691 | 1  |
| MSTRG. 9891. 1  | 432  | 0. 36092 | 6. 349304199 | 1  |
| MSTRG. 9891. 2  | 351  | 0. 37089 | 6. 055603027 | 1  |
| MSTRG. 9891. 3  | 351  | 0. 41296 | 6. 055603027 | 1  |
| MSTRG. 9891. 4  | 432  | 0. 39521 | 6. 349304199 | 1  |



|                 |      |          |              |    |
|-----------------|------|----------|--------------|----|
| MSTRG. 9891. 6  | 352  | 0. 37089 | 6. 055603027 | 1  |
| MSTRG. 9891. 7  | 352  | 0. 41296 | 6. 055603027 | 1  |
| MSTRG. 9891. 8  | 351  | 0. 40455 | 6. 055603027 | 1  |
| MSTRG. 9891. 9  | 351  | 0. 41723 | 6. 055603027 | 1  |
| MSTRG. 9891. 10 | 433  | 0. 39948 | 6. 349304199 | 1  |
| MSTRG. 9891. 11 | 433  | 0. 41409 | 6. 349304199 | 1  |
| MSTRG. 9893. 1  | 44   | 0. 34982 | 9. 989196777 | 1  |
| MSTRG. 9894. 1  | 862  | 0. 4429  | 4. 452209473 | 1  |
| MSTRG. 9894. 2  | 934  | 0. 4429  | 4. 465881348 | 1  |
| MSTRG. 9894. 3  | 846  | 0. 44818 | 4. 472106934 | 1  |
| MSTRG. 9898. 1  | 109  | 0. 36501 | 5. 383728027 | -1 |
| MSTRG. 9898. 2  | 116  | 0. 4398  | 5. 413879395 | -1 |
| MSTRG. 9902. 6  | 674  | 0. 47579 | 5. 265563965 | 1  |
| MSTRG. 9902. 5  | 625  | 0. 45044 | 5. 195251465 | 1  |
| MSTRG. 9902. 9  | 101  | 0. 29919 | 8. 931091309 | 1  |
| MSTRG. 9902. 8  | 443  | 0. 4643  | 5. 700622559 | 1  |
| MSTRG. 9902. 10 | 481  | 0. 47715 | 5. 684509277 | 1  |
| MSTRG. 9902. 11 | 316  | 0. 4724  | 4. 989196777 | 1  |
| MSTRG. 9899. 3  | 242  | 0. 3337  | 9. 583435059 | 1  |
| MSTRG. 9899. 4  | 126  | 0. 31913 | 9. 365661621 | 1  |
| MSTRG. 9899. 5  | 139  | 0. 33639 | 8. 291687012 | 1  |
| MSTRG. 9906. 2  | 1233 | 0. 36954 | 8. 917297363 | 1  |
| MSTRG. 9913. 2  | 458  | 0. 36757 | 8. 757629395 | 1  |
| MSTRG. 9913. 6  | 222  | 0. 39607 | 9. 620544434 | 1  |
| MSTRG. 9915. 2  | 496  | 0. 46221 | 8. 445129395 | 1  |
| MSTRG. 9918. 1  | 65   | 0. 42151 | 10. 84307861 | 1  |
| MSTRG. 9919. 2  | 325  | 0. 44133 | 8. 855895996 | 1  |
| MSTRG. 9919. 3  | 213  | 0. 45017 | 9. 125427246 | 1  |
| MSTRG. 9919. 4  | 189  | 0. 37445 | 10. 41900635 | 1  |
| MSTRG. 9924. 3  | 332  | 0. 43955 | 6. 488220215 | 1  |
| MSTRG. 9929. 1  | 481  | 0. 37675 | 8. 860900879 | 1  |
| MSTRG. 9929. 6  | 481  | 0. 4047  | 8. 860900879 | 1  |
| MSTRG. 9929. 5  | 301  | 0. 39381 | 7. 341369629 | 1  |
| MSTRG. 9934. 3  | 447  | 0. 4212  | 8. 824890137 | 1  |
| MSTRG. 9941. 2  | 605  | 0. 44137 | 4. 601867676 | 1  |
| MSTRG. 9944. 1  | 317  | 0. 33299 | 6. 427307129 | 1  |
| MSTRG. 9944. 2  | 246  | 0. 34508 | 6. 343322754 | 1  |
| MSTRG. 9944. 3  | 317  | 0. 43346 | 6. 427307129 | 1  |
| MSTRG. 9948. 1  | 116  | 0. 29924 | 7. 733703613 | 1  |
| MSTRG. 9961. 1  | 42   | 0. 45666 | 5. 750061035 | -1 |
| MSTRG. 9962. 3  | 385  | 0. 35713 | 5. 562561035 | 1  |
| MSTRG. 9962. 4  | 385  | 0. 36608 | 5. 562561035 | 1  |
| MSTRG. 9963. 2  | 465  | 0. 29492 | 9. 985290527 | 1  |
| MSTRG. 9960. 1  | 51   | 0. 38039 | 7. 964294434 | 1  |
| MSTRG. 9972. 3  | 368  | 0. 36153 | 5. 135559082 | 1  |
| MSTRG. 9972. 4  | 519  | 0. 39854 | 4. 57611084  | 1  |
| MSTRG. 9974. 1  | 83   | 0. 36344 | 12. 00848389 | 1  |
| MSTRG. 9977. 1  | 177  | 0. 28862 | 8. 031066895 | 1  |
| MSTRG. 9977. 2  | 177  | 0. 36568 | 8. 031066895 | 1  |
| MSTRG. 9984. 1  | 1221 | 0. 44803 | 8. 983459473 | 1  |
| MSTRG. 9984. 2  | 1221 | 0. 4554  | 8. 983459473 | 1  |
| MSTRG. 9985. 2  | 260  | 0. 39081 | 5. 64666748  | 1  |
| MSTRG. 9986. 1  | 180  | 0. 32788 | 8. 329162598 | 1  |
| MSTRG. 9986. 3  | 183  | 0. 31927 | 8. 629089355 | 1  |

|                  |      |          |              |    |
|------------------|------|----------|--------------|----|
| MSTRG. 9987. 3   | 369  | 0. 42398 | 4. 88458252  | 1  |
| MSTRG. 9987. 4   | 413  | 0. 44032 | 4. 880310059 | 1  |
| MSTRG. 9990. 1   | 22   | 0. 4036  | 5. 897644043 | 1  |
| MSTRG. 9993. 2   | 698  | 0. 4383  | 8. 437805176 | -1 |
| MSTRG. 9994. 1   | 289  | 0. 33275 | 10. 61553955 | 1  |
| MSTRG. 9997. 1   | 242  | 0. 37045 | 4. 281188965 | 1  |
| MSTRG. 9997. 2   | 242  | 0. 37665 | 4. 281188965 | 1  |
| MSTRG. 9997. 3   | 591  | 0. 44527 | 4. 807189941 | 1  |
| MSTRG. 9997. 4   | 336  | 0. 38358 | 9. 732971191 | 1  |
| MSTRG. 9997. 5   | 366  | 0. 44281 | 9. 297912598 | 1  |
| MSTRG. 10000. 1  | 287  | 0. 432   | 6. 198303223 | 1  |
| MSTRG. 10001. 1  | 567  | 0. 41682 | 4. 980285645 | 1  |
| MSTRG. 10001. 4  | 572  | 0. 4246  | 4. 96282959  | 1  |
| MSTRG. 10002. 1  | 246  | 0. 36087 | 6. 940124512 | 1  |
| MSTRG. 10005. 2  | 210  | 0. 35813 | 5. 692687988 | 1  |
| MSTRG. 10005. 1  | 210  | 0. 37385 | 5. 692687988 | 1  |
| MSTRG. 10008. 4  | 683  | 0. 34351 | 8. 796813965 | 1  |
| MSTRG. 10009. 2  | 413  | 0. 39665 | 5. 114318848 | 1  |
| MSTRG. 10011. 1  | 57   | 0. 42917 | 11. 91326904 | 1  |
| MSTRG. 10012. 2  | 453  | 0. 3941  | 9. 648620605 | 1  |
| MSTRG. 10012. 3  | 453  | 0. 38548 | 9. 648620605 | 1  |
| MSTRG. 10012. 4  | 495  | 0. 35509 | 9. 972595215 | 1  |
| MSTRG. 10013. 1  | 68   | 0. 3847  | 10. 51885986 | 1  |
| MSTRG. 10014. 1  | 171  | 0. 31873 | 9. 51348877  | 1  |
| MSTRG. 10014. 3  | 171  | 0. 28995 | 9. 51348877  | 1  |
| MSTRG. 10016. 1  | 128  | 0. 32937 | 7. 658630371 | 1  |
| MSTRG. 10020. 4  | 377  | 0. 45389 | 8. 231140137 | 1  |
| MSTRG. 10026. 10 | 618  | 0. 41377 | 9. 16619873  | 1  |
| MSTRG. 10026. 13 | 401  | 0. 40983 | 6. 801330566 | 1  |
| MSTRG. 10026. 11 | 629  | 0. 41887 | 8. 933410645 | 1  |
| MSTRG. 10026. 12 | 630  | 0. 42445 | 9. 01739502  | 1  |
| MSTRG. 10026. 18 | 649  | 0. 41422 | 8. 628601074 | -1 |
| MSTRG. 10024. 2  | 216  | 0. 30897 | 9. 542541504 | 1  |
| MSTRG. 10024. 3  | 240  | 0. 30897 | 9. 165588379 | 1  |
| MSTRG. 10025. 1  | 71   | 0. 33483 | 10. 61419678 | 1  |
| MSTRG. 10031. 1  | 64   | 0. 37482 | 9. 493469238 | 1  |
| MSTRG. 10041. 2  | 1411 | 0. 4429  | 6. 406921387 | 1  |
| MSTRG. 10041. 3  | 1091 | 0. 48552 | 5. 485412598 | 1  |
| MSTRG. 10041. 7  | 1401 | 0. 43267 | 6. 406921387 | 1  |
| MSTRG. 10042. 1  | 63   | 0. 29377 | 5. 083190918 | 1  |
| MSTRG. 10043. 2  | 868  | 0. 43036 | 9. 366638184 | 1  |
| MSTRG. 10043. 5  | 839  | 0. 41407 | 9. 401550293 | -1 |
| MSTRG. 10043. 6  | 1131 | 0. 41407 | 8. 950744629 | -1 |
| MSTRG. 10045. 2  | 105  | 0. 3256  | 10. 54388428 | 1  |
| MSTRG. 10037. 3  | 246  | 0. 43561 | 9. 155090332 | 1  |
| MSTRG. 10038. 1  | 180  | 0. 33255 | 11. 60137939 | 1  |
| MSTRG. 10038. 2  | 91   | 0. 31253 | 9. 297790527 | 1  |
| MSTRG. 10049. 1  | 346  | 0. 32387 | 8. 90423584  | 1  |
| MSTRG. 10050. 2  | 77   | 0. 3407  | 11. 44537354 | 1  |
| MSTRG. 10052. 2  | 785  | 0. 35504 | 9. 221130371 | 1  |
| MSTRG. 10053. 1  | 242  | 0. 37798 | 9. 09576416  | 1  |
| MSTRG. 10051. 2  | 44   | 0. 41878 | 8. 574035645 | -1 |
| MSTRG. 10058. 1  | 124  | 0. 28999 | 5. 911071777 | 1  |
| MSTRG. 10060. 1  | 767  | 0. 4361  | 5. 702209473 | 1  |

|                  |      |          |              |    |
|------------------|------|----------|--------------|----|
| MSTRG. 10078. 4  | 593  | 0. 39681 | 9. 367980957 | 1  |
| MSTRG. 10078. 5  | 512  | 0. 3705  | 9. 331115723 | 1  |
| MSTRG. 10078. 3  | 597  | 0. 41758 | 9. 377624512 | 1  |
| MSTRG. 10079. 1  | 152  | 0. 29772 | 4. 91204834  | 1  |
| MSTRG. 10079. 2  | 119  | 0. 43084 | 4. 540588379 | 1  |
| MSTRG. 10079. 3  | 119  | 0. 4545  | 4. 540588379 | 1  |
| MSTRG. 10082. 2  | 115  | 0. 31432 | 9. 671691895 | 1  |
| MSTRG. 10087. 3  | 306  | 0. 46399 | 6. 338195801 | 1  |
| MSTRG. 10091. 1  | 352  | 0. 46738 | 6. 117248535 | 1  |
| MSTRG. 10091. 2  | 352  | 0. 43356 | 6. 117248535 | 1  |
| MSTRG. 10091. 3  | 319  | 0. 41127 | 5. 653503418 | 1  |
| MSTRG. 10092. 1  | 96   | 0. 40178 | 8. 93182373  | 1  |
| MSTRG. 10094. 8  | 369  | 0. 44299 | 9. 83392334  | 1  |
| MSTRG. 10094. 6  | 372  | 0. 45066 | 9. 801940918 | 1  |
| MSTRG. 10094. 7  | 369  | 0. 45724 | 9. 83392334  | 1  |
| MSTRG. 10094. 9  | 368  | 0. 44299 | 9. 81463623  | 1  |
| MSTRG. 10094. 10 | 371  | 0. 45066 | 9. 781799316 | 1  |
| MSTRG. 10094. 11 | 371  | 0. 46115 | 9. 781799316 | 1  |
| MSTRG. 10100. 1  | 123  | 0. 33114 | 9. 387268066 | 1  |
| MSTRG. 10100. 2  | 87   | 0. 37975 | 8. 557556152 | 1  |
| MSTRG. 10101. 1  | 57   | 0. 29434 | 5. 538513184 | 1  |
| MSTRG. 10101. 3  | 56   | 0. 2997  | 9. 479064941 | 1  |
| MSTRG. 10104. 2  | 179  | 0. 29772 | 9. 885559082 | 1  |
| MSTRG. 10105. 2  | 51   | 0. 29871 | 6. 514465332 | 1  |
| MSTRG. 10107. 1  | 642  | 0. 30961 | 6. 211608887 | 1  |
| MSTRG. 10102. 2  | 350  | 0. 33565 | 6. 065856934 | 1  |
| MSTRG. 10103. 1  | 134  | 0. 34956 | 9. 445983887 | 1  |
| MSTRG. 10121. 1  | 555  | 0. 30356 | 5. 331115723 | 1  |
| MSTRG. 10121. 3  | 555  | 0. 34935 | 5. 331115723 | 1  |
| MSTRG. 10121. 4  | 204  | 0. 36318 | 5. 493225098 | -1 |
| MSTRG. 10122. 1  | 805  | 0. 42044 | 8. 204650879 | 1  |
| MSTRG. 10122. 2  | 763  | 0. 43181 | 7. 542663574 | 1  |
| MSTRG. 10122. 3  | 764  | 0. 46099 | 7. 542663574 | 1  |
| MSTRG. 10122. 4  | 569  | 0. 3852  | 9. 05267334  | 1  |
| MSTRG. 10123. 1  | 221  | 0. 28266 | 9. 886291504 | 1  |
| MSTRG. 10122. 5  | 624  | 0. 41704 | 9. 29864502  | 1  |
| MSTRG. 10122. 6  | 342  | 0. 39669 | 8. 253967285 | 1  |
| MSTRG. 10122. 7  | 570  | 0. 41668 | 9. 05267334  | 1  |
| MSTRG. 10122. 8  | 605  | 0. 44498 | 8. 428894043 | 1  |
| MSTRG. 10133. 9  | 56   | 0. 28165 | 9. 301940918 | 1  |
| MSTRG. 10133. 3  | 884  | 0. 49546 | 4. 785827637 | 1  |
| MSTRG. 10133. 6  | 916  | 0. 41374 | 4. 86138916  | 1  |
| MSTRG. 10133. 5  | 906  | 0. 41074 | 4. 793151855 | 1  |
| MSTRG. 10133. 11 | 916  | 0. 48022 | 4. 806213379 | 1  |
| MSTRG. 10133. 12 | 884  | 0. 43684 | 4. 785827637 | 1  |
| MSTRG. 10112. 2  | 51   | 0. 36288 | 4. 489318848 | 1  |
| MSTRG. 10112. 3  | 1137 | 0. 46328 | 4. 515441895 | 1  |
| MSTRG. 10112. 4  | 1222 | 0. 45645 | 4. 507995605 | 1  |
| MSTRG. 10112. 5  | 1295 | 0. 4611  | 4. 530212402 | 1  |
| MSTRG. 10112. 10 | 972  | 0. 46238 | 4. 625061035 | 1  |
| MSTRG. 10112. 11 | 868  | 0. 4611  | 4. 545837402 | 1  |
| MSTRG. 10112. 12 | 899  | 0. 47628 | 4. 593933105 | 1  |
| MSTRG. 10115. 4  | 456  | 0. 38854 | 5. 774230957 | 1  |
| MSTRG. 10115. 3  | 456  | 0. 35092 | 5. 774230957 | 1  |

|                  |      |          |              |   |
|------------------|------|----------|--------------|---|
| MSTRG. 10115. 5  | 159  | 0. 37746 | 6. 897766113 | 1 |
| MSTRG. 10116. 2  | 392  | 0. 2899  | 8. 452209473 | 1 |
| MSTRG. 10134. 1  | 115  | 0. 347   | 6. 143005371 | 1 |
| MSTRG. 10138. 3  | 12   | 0. 37987 | 7. 976013184 | 1 |
| MSTRG. 10138. 2  | 906  | 0. 46266 | 5. 949279785 | 1 |
| MSTRG. 10139. 1  | 107  | 0. 30328 | 5. 424377441 | 1 |
| MSTRG. 10138. 7  | 588  | 0. 48898 | 5. 411560059 | 1 |
| MSTRG. 10142. 1  | 52   | 0. 33607 | 8. 841491699 | 1 |
| MSTRG. 10146. 6  | 506  | 0. 43249 | 5. 737609863 | 1 |
| MSTRG. 10146. 5  | 462  | 0. 47095 | 5. 521057129 | 1 |
| MSTRG. 10147. 1  | 125  | 0. 36125 | 10. 3706665  | 1 |
| MSTRG. 10148. 1  | 849  | 0. 47677 | 5. 867736816 | 1 |
| MSTRG. 10148. 2  | 843  | 0. 47437 | 5. 420837402 | 1 |
| MSTRG. 10148. 3  | 897  | 0. 47842 | 5. 710876465 | 1 |
| MSTRG. 10148. 7  | 897  | 0. 47842 | 5. 710876465 | 1 |
| MSTRG. 10148. 9  | 897  | 0. 47929 | 5. 710876465 | 1 |
| MSTRG. 10148. 8  | 897  | 0. 45323 | 5. 710876465 | 1 |
| MSTRG. 10148. 6  | 849  | 0. 35371 | 5. 867736816 | 1 |
| MSTRG. 10148. 4  | 897  | 0. 44548 | 5. 710876465 | 1 |
| MSTRG. 10143. 2  | 185  | 0. 46906 | 5. 190979004 | 1 |
| MSTRG. 10143. 3  | 205  | 0. 46643 | 7. 747253418 | 1 |
| MSTRG. 10155. 1  | 83   | 0. 36721 | 11. 65460205 | 1 |
| MSTRG. 10159. 1  | 780  | 0. 40631 | 5. 089660645 | 1 |
| MSTRG. 10160. 1  | 645  | 0. 40655 | 9. 520690918 | 1 |
| MSTRG. 10162. 1  | 32   | 0. 26876 | 11. 4196167  | 1 |
| MSTRG. 10172. 2  | 116  | 0. 39342 | 4. 329528809 | 1 |
| MSTRG. 10172. 5  | 322  | 0. 37494 | 6. 066345215 | 1 |
| MSTRG. 10172. 6  | 25   | 0. 34133 | 8. 119934082 | 1 |
| MSTRG. 10173. 1  | 78   | 0. 29368 | 9. 99395752  | 1 |
| MSTRG. 10173. 2  | 78   | 0. 30016 | 9. 99395752  | 1 |
| MSTRG. 10172. 8  | 103  | 0. 36126 | 4. 232849121 | 1 |
| MSTRG. 10172. 9  | 103  | 0. 33724 | 4. 232849121 | 1 |
| MSTRG. 10172. 10 | 103  | 0. 36117 | 4. 232849121 | 1 |
| MSTRG. 10172. 11 | 104  | 0. 3619  | 4. 595031738 | 1 |
| MSTRG. 10175. 1  | 122  | 0. 3217  | 6. 324768066 | 1 |
| MSTRG. 10175. 2  | 189  | 0. 27987 | 7. 760314941 | 1 |
| MSTRG. 10175. 3  | 174  | 0. 35317 | 6. 445617676 | 1 |
| MSTRG. 10175. 4  | 122  | 0. 46914 | 6. 324768066 | 1 |
| MSTRG. 10175. 5  | 122  | 0. 45073 | 6. 324768066 | 1 |
| MSTRG. 10178. 6  | 2304 | 0. 43531 | 5. 62322998  | 1 |
| MSTRG. 10178. 15 | 1842 | 0. 47176 | 6. 821228027 | 1 |
| MSTRG. 10178. 7  | 2593 | 0. 44247 | 5. 485290527 | 1 |
| MSTRG. 10178. 8  | 2380 | 0. 44247 | 5. 704162598 | 1 |
| MSTRG. 10178. 12 | 1596 | 0. 46201 | 8. 469177246 | 1 |
| MSTRG. 10178. 11 | 1655 | 0. 46201 | 8. 519348145 | 1 |
| MSTRG. 10178. 9  | 2616 | 0. 44247 | 5. 54876709  | 1 |
| MSTRG. 10178. 13 | 1655 | 0. 47176 | 8. 519348145 | 1 |
| MSTRG. 10178. 1  | 2633 | 0. 461   | 5. 534851074 | 1 |
| MSTRG. 10178. 14 | 2635 | 0. 44714 | 5. 534240723 | 1 |
| MSTRG. 10178. 16 | 2616 | 0. 45333 | 5. 54876709  | 1 |
| MSTRG. 10178. 3  | 2652 | 0. 45333 | 5. 520568848 | 1 |
| MSTRG. 10178. 10 | 2633 | 0. 46585 | 5. 534851074 | 1 |
| MSTRG. 10178. 5  | 1655 | 0. 43368 | 8. 519348145 | 1 |
| MSTRG. 10178. 17 | 2446 | 0. 47768 | 5. 792663574 | 1 |

|                  |      |          |              |    |
|------------------|------|----------|--------------|----|
| MSTRG. 10178. 18 | 2411 | 0. 46694 | 5. 573791504 | 1  |
| MSTRG. 10178. 19 | 1733 | 0. 47111 | 6. 734191895 | 1  |
| MSTRG. 10178. 20 | 1775 | 0. 46959 | 6. 891540527 | 1  |
| MSTRG. 10178. 21 | 1792 | 0. 42581 | 6. 818054199 | 1  |
| MSTRG. 10178. 22 | 1520 | 0. 46105 | 8. 234924316 | 1  |
| MSTRG. 10178. 24 | 1792 | 0. 44806 | 6. 818054199 | 1  |
| MSTRG. 10178. 23 | 1792 | 0. 44699 | 6. 818054199 | 1  |
| MSTRG. 10180. 2  | 263  | 0. 36374 | 7. 019958496 | 1  |
| MSTRG. 10164. 2  | 163  | 0. 46333 | 5. 137145996 | 1  |
| MSTRG. 10164. 1  | 493  | 0. 48436 | 5. 60760498  | 1  |
| MSTRG. 10164. 3  | 163  | 0. 45499 | 5. 137145996 | 1  |
| MSTRG. 10183. 4  | 123  | 0. 34639 | 8. 32232666  | 1  |
| MSTRG. 10184. 1  | 187  | 0. 30151 | 10. 293396   | 1  |
| MSTRG. 10185. 1  | 59   | 0. 34615 | 11. 52838135 | 1  |
| MSTRG. 10195. 1  | 109  | 0. 4355  | 12. 07061768 | 1  |
| MSTRG. 10198. 1  | 777  | 0. 45205 | 5. 08795166  | 1  |
| MSTRG. 10197. 5  | 59   | 0. 40914 | 4. 484436035 | 1  |
| MSTRG. 10197. 6  | 153  | 0. 36735 | 7. 738830566 | 1  |
| MSTRG. 10208. 1  | 115  | 0. 26101 | 7. 65411377  | 1  |
| MSTRG. 10209. 1  | 139  | 0. 40813 | 5. 565246582 | 1  |
| MSTRG. 10197. 7  | 84   | 0. 43189 | 6. 814147949 | 1  |
| MSTRG. 10197. 8  | 46   | 0. 37995 | 11. 10540771 | 1  |
| MSTRG. 10197. 9  | 212  | 0. 39715 | 12. 02020264 | 1  |
| MSTRG. 10213. 1  | 352  | 0. 42647 | 11. 28619385 | 1  |
| MSTRG. 10214. 1  | 63   | 0. 38659 | 11. 24835205 | 1  |
| MSTRG. 10215. 1  | 51   | 0. 39868 | 8. 473083496 | 1  |
| MSTRG. 10230. 1  | 78   | 0. 35654 | 6. 375549316 | 1  |
| MSTRG. 10231. 1  | 931  | 0. 37456 | 4. 769470215 | 1  |
| MSTRG. 10231. 2  | 932  | 0. 46951 | 4. 777770996 | 1  |
| MSTRG. 10232. 1  | 5    | 0. 34632 | 5. 274963379 | 1  |
| MSTRG. 10234. 1  | 88   | 0. 3596  | 9. 298278809 | 1  |
| MSTRG. 10234. 2  | 52   | 0. 41162 | 6. 707580566 | 1  |
| MSTRG. 10231. 4  | 1047 | 0. 46581 | 5. 431091309 | 1  |
| MSTRG. 10234. 3  | 35   | 0. 3751  | 6. 52545166  | 1  |
| MSTRG. 10235. 1  | 239  | 0. 42422 | 9. 620300293 | 1  |
| MSTRG. 10231. 9  | 932  | 0. 45699 | 4. 702819824 | 1  |
| MSTRG. 10236. 1  | 98   | 0. 39689 | 8. 591491699 | 1  |
| MSTRG. 10231. 12 | 931  | 0. 46901 | 4. 915588379 | 1  |
| MSTRG. 10231. 16 | 816  | 0. 44423 | 4. 59552002  | 1  |
| MSTRG. 10231. 15 | 932  | 0. 36634 | 4. 74041748  | 1  |
| MSTRG. 10231. 18 | 854  | 0. 42151 | 4. 61907959  | 1  |
| MSTRG. 10231. 19 | 269  | 0. 35517 | 4. 556335449 | -1 |
| MSTRG. 10237. 1  | 67   | 0. 31454 | 6. 029602051 | 1  |
| MSTRG. 10238. 1  | 183  | 0. 28562 | 10. 33294678 | 1  |
| MSTRG. 10239. 3  | 1210 | 0. 45496 | 5. 251159668 | 1  |
| MSTRG. 10239. 4  | 1295 | 0. 44535 | 5. 34954834  | 1  |
| MSTRG. 10222. 1  | 189  | 0. 28519 | 9. 207946777 | 1  |
| MSTRG. 10219. 1  | 22   | 0. 42718 | 11. 52288818 | 1  |
| MSTRG. 10219. 2  | 22   | 0. 38434 | 11. 52288818 | 1  |
| MSTRG. 10219. 3  | 22   | 0. 44668 | 11. 52288818 | 1  |
| MSTRG. 10243. 7  | 474  | 0. 32485 | 4. 744934082 | 1  |
| MSTRG. 10243. 8  | 527  | 0. 28267 | 5. 133483887 | 1  |
| MSTRG. 10255. 1  | 55   | 0. 37927 | 6. 696228027 | 1  |
| MSTRG. 10256. 3  | 386  | 0. 35443 | 5. 972351074 | 1  |

|                 |      |          |              |    |
|-----------------|------|----------|--------------|----|
| MSTRG. 10259. 1 | 87   | 0. 28338 | 9. 506530762 | 1  |
| MSTRG. 10260. 1 | 205  | 0. 28419 | 10. 1651001  | 1  |
| MSTRG. 10261. 1 | 81   | 0. 32575 | 9. 836975098 | 1  |
| MSTRG. 10266. 2 | 648  | 0. 3824  | 6. 384460449 | 1  |
| MSTRG. 10268. 1 | 63   | 0. 32548 | 9. 59942627  | 1  |
| MSTRG. 10270. 1 | 44   | 0. 40604 | 6. 807189941 | -1 |
| MSTRG. 10273. 2 | 342  | 0. 44709 | 10. 23297119 | 1  |
| MSTRG. 10273. 4 | 210  | 0. 4448  | 10. 21478271 | 1  |
| MSTRG. 10273. 3 | 210  | 0. 43188 | 10. 21478271 | 1  |
| MSTRG. 10273. 5 | 210  | 0. 42845 | 10. 21478271 | 1  |
| MSTRG. 10275. 1 | 49   | 0. 39028 | 8. 309143066 | 1  |
| MSTRG. 10278. 2 | 1058 | 0. 40513 | 9. 243469238 | 1  |
| MSTRG. 10281. 7 | 973  | 0. 42072 | 8. 253356934 | 1  |
| MSTRG. 10281. 9 | 1011 | 0. 46116 | 8. 880432129 | 1  |
| MSTRG. 10281. 6 | 676  | 0. 45207 | 5. 434020996 | 1  |
| MSTRG. 10281. 4 | 1013 | 0. 45207 | 8. 000427246 | 1  |
| MSTRG. 10281. 5 | 1079 | 0. 45207 | 8. 471130371 | 1  |
| MSTRG. 10281. 8 | 1034 | 0. 45207 | 8. 36541748  | 1  |
| MSTRG. 10282. 2 | 288  | 0. 41191 | 6. 071838379 | 1  |
| MSTRG. 10282. 3 | 432  | 0. 42786 | 6. 149963379 | 1  |
| MSTRG. 10282. 4 | 431  | 0. 43644 | 6. 415100098 | 1  |
| MSTRG. 10284. 1 | 684  | 0. 37743 | 5. 979309082 | 1  |
| MSTRG. 10284. 4 | 534  | 0. 45946 | 5. 849060059 | 1  |
| MSTRG. 10290. 1 | 87   | 0. 39307 | 6. 538879395 | -1 |
| MSTRG. 10290. 2 | 79   | 0. 3787  | 6. 513122559 | 1  |
| MSTRG. 10302. 4 | 1113 | 0. 46739 | 5. 831481934 | 1  |
| MSTRG. 10305. 1 | 1249 | 0. 33006 | 5. 977111816 | 1  |
| MSTRG. 10305. 2 | 78   | 0. 3     | 8. 737609863 | 1  |
| MSTRG. 10306. 1 | 46   | 0. 3923  | 5. 987487793 | 1  |
| MSTRG. 10319. 2 | 734  | 0. 35371 | 8. 768981934 | 1  |
| MSTRG. 10322. 2 | 118  | 0. 31236 | 8. 49407959  | 1  |
| MSTRG. 10322. 1 | 100  | 0. 33699 | 9. 60357666  | 1  |
| MSTRG. 10317. 1 | 76   | 0. 46447 | 8. 06451416  | -1 |
| MSTRG. 10326. 3 | 190  | 0. 47259 | 7. 64276123  | 1  |
| MSTRG. 10330. 3 | 151  | 0. 44466 | 10. 07476807 | 1  |
| MSTRG. 10331. 1 | 882  | 0. 47061 | 8. 093200684 | 1  |
| MSTRG. 10331. 2 | 882  | 0. 46546 | 8. 093200684 | 1  |
| MSTRG. 10329. 3 | 681  | 0. 29514 | 9. 218688965 | 1  |
| MSTRG. 10343. 1 | 501  | 0. 30862 | 5. 815002441 | 1  |
| MSTRG. 10344. 1 | 104  | 0. 32665 | 9. 766662598 | 1  |
| MSTRG. 10343. 4 | 403  | 0. 37021 | 7. 920837402 | 1  |
| MSTRG. 10343. 5 | 501  | 0. 28432 | 5. 815002441 | 1  |
| MSTRG. 10335. 1 | 488  | 0. 46588 | 7. 656799316 | 1  |
| MSTRG. 10335. 3 | 488  | 0. 48069 | 7. 656799316 | 1  |
| MSTRG. 10336. 2 | 667  | 0. 47133 | 5. 700866699 | 1  |
| MSTRG. 10337. 1 | 63   | 0. 41735 | 8. 886047363 | 1  |
| MSTRG. 10341. 2 | 387  | 0. 46374 | 8. 282043457 | 1  |
| MSTRG. 10341. 3 | 249  | 0. 42285 | 6. 80682373  | 1  |
| MSTRG. 10342. 1 | 70   | 0. 41048 | 9. 161560059 | 1  |
| MSTRG. 10350. 1 | 438  | 0. 3752  | 7. 968200684 | 1  |
| MSTRG. 10351. 1 | 1305 | 0. 47281 | 5. 783508301 | 1  |
| MSTRG. 10351. 2 | 926  | 0. 47281 | 5. 895935059 | 1  |
| MSTRG. 10351. 3 | 2843 | 0. 47609 | 5. 037658691 | 1  |
| MSTRG. 10356. 3 | 372  | 0. 49456 | 4. 928405762 | 1  |

|                  |      |          |              |    |
|------------------|------|----------|--------------|----|
| MSTRG. 10356. 4  | 431  | 0. 46058 | 5. 217346191 | 1  |
| MSTRG. 10362. 2  | 127  | 0. 44119 | 9. 434265137 | 1  |
| MSTRG. 10366. 2  | 500  | 0. 45838 | 4. 784851074 | 1  |
| MSTRG. 10370. 2  | 366  | 0. 42916 | 8. 525817871 | 1  |
| MSTRG. 10370. 3  | 206  | 0. 30193 | 8. 104675293 | 1  |
| MSTRG. 10373. 3  | 921  | 0. 3288  | 8. 854553223 | 1  |
| MSTRG. 10373. 2  | 1115 | 0. 33973 | 8. 710266113 | 1  |
| MSTRG. 10373. 5  | 324  | 0. 28338 | 9. 145446777 | -1 |
| MSTRG. 10374. 1  | 92   | 0. 36609 | 9. 055480957 | 1  |
| MSTRG. 10375. 1  | 126  | 0. 45202 | 9. 440856934 | 1  |
| MSTRG. 10377. 1  | 20   | 0. 36723 | 3. 998840332 | 1  |
| MSTRG. 10379. 1  | 31   | 0. 37205 | 10. 43267822 | 1  |
| MSTRG. 10372. 1  | 115  | 0. 28415 | 6. 631896973 | 1  |
| MSTRG. 10372. 2  | 105  | 0. 28415 | 6. 69708252  | 1  |
| MSTRG. 10437. 2  | 289  | 0. 28923 | 9. 139099121 | 1  |
| MSTRG. 10437. 3  | 289  | 0. 28518 | 9. 139099121 | 1  |
| MSTRG. 10437. 4  | 88   | 0. 32477 | 9. 617004395 | 1  |
| MSTRG. 10437. 5  | 193  | 0. 30132 | 9. 492492676 | 1  |
| MSTRG. 10437. 7  | 103  | 0. 32386 | 7. 669006348 | 1  |
| MSTRG. 10437. 6  | 167  | 0. 2985  | 9. 671203613 | 1  |
| MSTRG. 10437. 8  | 289  | 0. 28982 | 9. 139099121 | 1  |
| MSTRG. 10437. 9  | 289  | 0. 28923 | 9. 139099121 | 1  |
| MSTRG. 10437. 10 | 167  | 0. 2951  | 9. 671203613 | 1  |
| MSTRG. 10437. 11 | 215  | 0. 30467 | 8. 953674316 | 1  |
| MSTRG. 10437. 12 | 240  | 0. 28982 | 9. 244445801 | 1  |
| MSTRG. 10437. 13 | 188  | 0. 28982 | 9. 249450684 | 1  |
| MSTRG. 10437. 14 | 289  | 0. 28982 | 9. 139099121 | 1  |
| MSTRG. 10437. 15 | 191  | 0. 29146 | 9. 492492676 | 1  |
| MSTRG. 10437. 16 | 236  | 0. 28982 | 10. 04742432 | 1  |
| MSTRG. 10437. 17 | 91   | 0. 29543 | 9. 011901855 | -1 |
| MSTRG. 10439. 1  | 85   | 0. 35123 | 9. 070617676 | -1 |
| MSTRG. 10437. 18 | 301  | 0. 3     | 9. 395812988 | 1  |
| MSTRG. 10440. 1  | 107  | 0. 2731  | 5. 328186035 | 1  |
| MSTRG. 10437. 19 | 331  | 0. 30804 | 8. 674865723 | 1  |
| MSTRG. 10437. 20 | 79   | 0. 2921  | 9. 694519043 | 1  |
| MSTRG. 10441. 1  | 324  | 0. 3     | 6. 762145996 | 1  |
| MSTRG. 10442. 1  | 280  | 0. 29343 | 9. 736755371 | 1  |
| MSTRG. 10443. 1  | 84   | 0. 30387 | 8. 206115723 | 1  |
| MSTRG. 10445. 1  | 60   | 0. 37021 | 8. 589538574 | 1  |
| MSTRG. 10437. 21 | 110  | 0. 3782  | 6. 967712402 | -1 |
| MSTRG. 10447. 1  | 122  | 0. 32741 | 10. 21307373 | 1  |
| MSTRG. 10437. 22 | 148  | 0. 31444 | 10. 38092041 | 1  |
| MSTRG. 10381. 1  | 66   | 0. 36618 | 5. 037902832 | 1  |
| MSTRG. 10381. 3  | 66   | 0. 43303 | 5. 037902832 | 1  |
| MSTRG. 10381. 4  | 86   | 0. 43372 | 4. 781066895 | 1  |
| MSTRG. 10381. 5  | 86   | 0. 41968 | 4. 781066895 | 1  |
| MSTRG. 10381. 6  | 86   | 0. 36212 | 4. 781066895 | 1  |
| MSTRG. 10386. 1  | 93   | 0. 35575 | 7. 894592285 | -1 |
| MSTRG. 10391. 1  | 47   | 0. 31029 | 4. 957702637 | 1  |
| MSTRG. 10383. 1  | 117  | 0. 36327 | 4. 409240723 | 1  |
| MSTRG. 10392. 1  | 153  | 0. 45176 | 9. 707092285 | 1  |
| MSTRG. 10399. 2  | 355  | 0. 47105 | 9. 274719238 | 1  |
| MSTRG. 10399. 3  | 290  | 0. 45022 | 10. 22418213 | 1  |
| MSTRG. 10400. 1  | 136  | 0. 2765  | 9. 880065918 | 1  |

|                 |      |         |             |    |
|-----------------|------|---------|-------------|----|
| MSTRG. 10401.3  | 173  | 0.36523 | 5.199035645 | 1  |
| MSTRG. 10410.2  | 51   | 0.40453 | 9.655212402 | 1  |
| MSTRG. 10419.2  | 294  | 0.34467 | 9.426696777 | 1  |
| MSTRG. 10419.3  | 294  | 0.31597 | 9.426696777 | 1  |
| MSTRG. 10419.4  | 625  | 0.34707 | 9.149475098 | 1  |
| MSTRG. 10420.1  | 143  | 0.29387 | 5.780700684 | 1  |
| MSTRG. 10419.6  | 186  | 0.28165 | 9.617492676 | 1  |
| MSTRG. 10407.1  | 487  | 0.33045 | 9.56463623  | 1  |
| MSTRG. 10407.2  | 280  | 0.45769 | 9.531311035 | 1  |
| MSTRG. 10407.3  | 73   | 0.30241 | 6.383239746 | 1  |
| MSTRG. 10409.1  | 318  | 0.41946 | 6.065734863 | 1  |
| MSTRG. 10470.8  | 223  | 0.379   | 9.895690918 | 1  |
| MSTRG. 10470.10 | 115  | 0.34209 | 10.13885498 | 1  |
| MSTRG. 10470.17 | 132  | 0.29187 | 6.938171387 | 1  |
| MSTRG. 10470.18 | 81   | 0.33073 | 9.951721191 | 1  |
| MSTRG. 10470.20 | 88   | 0.29502 | 6.80682373  | 1  |
| MSTRG. 10470.22 | 407  | 0.28584 | 9.125793457 | 1  |
| MSTRG. 10470.23 | 407  | 0.28923 | 9.125793457 | 1  |
| MSTRG. 10470.24 | 92   | 0.29387 | 7.684020996 | 1  |
| MSTRG. 10421.2  | 127  | 0.39861 | 7.717590332 | 1  |
| MSTRG. 10424.2  | 55   | 0.37622 | 6.695617676 | 1  |
| MSTRG. 10424.3  | 227  | 0.35272 | 4.167175293 | 1  |
| MSTRG. 10428.1  | 94   | 0.31588 | 8.970153809 | 1  |
| MSTRG. 10427.3  | 132  | 0.34656 | 8.617980957 | 1  |
| MSTRG. 10430.2  | 321  | 0.42117 | 9.035095215 | 1  |
| MSTRG. 10455.1  | 586  | 0.44941 | 6.66998291  | 1  |
| MSTRG. 10455.2  | 586  | 0.43117 | 6.66998291  | 1  |
| MSTRG. 10455.4  | 586  | 0.47205 | 6.66998291  | 1  |
| MSTRG. 10456.1  | 202  | 0.43902 | 5.696594238 | 1  |
| MSTRG. 10456.3  | 202  | 0.4651  | 5.696594238 | 1  |
| MSTRG. 10456.5  | 202  | 0.4651  | 5.696594238 | 1  |
| MSTRG. 10456.6  | 154  | 0.45124 | 5.084411621 | 1  |
| MSTRG. 10456.7  | 218  | 0.41922 | 5.210998535 | 1  |
| MSTRG. 10456.4  | 201  | 0.28883 | 5.696594238 | 1  |
| MSTRG. 10464.1  | 1319 | 0.43201 | 6.040344238 | 1  |
| MSTRG. 10466.1  | 47   | 0.45691 | 10.19232178 | 1  |
| MSTRG. 10435.2  | 222  | 0.31524 | 8.97064209  | 1  |
| MSTRG. 10488.3  | 334  | 0.46725 | 6.64239502  | 1  |
| MSTRG. 10488.5  | 334  | 0.42168 | 6.64239502  | 1  |
| MSTRG. 10488.2  | 334  | 0.45516 | 6.64239502  | 1  |
| MSTRG. 10488.4  | 334  | 0.47983 | 6.64239502  | 1  |
| MSTRG. 10489.1  | 131  | 0.35058 | 10.18499756 | 1  |
| MSTRG. 10481.1  | 62   | 0.38862 | 9.991882324 | -1 |
| MSTRG. 10491.1  | 54   | 0.39523 | 10.15570068 | 1  |
| MSTRG. 10507.1  | 2596 | 0.42016 | 6.278869629 | 1  |
| MSTRG. 10508.1  | 38   | 0.40313 | 10.20733643 | 1  |
| MSTRG. 10507.3  | 867  | 0.45673 | 5.54095459  | 1  |
| MSTRG. 10513.4  | 28   | 0.38686 | 10.76312256 | 1  |
| MSTRG. 10516.1  | 135  | 0.35736 | 5.515319824 | 1  |
| MSTRG. 10511.1  | 224  | 0.35015 | 8.232971191 | 1  |
| MSTRG. 10522.3  | 349  | 0.45126 | 6.155090332 | 1  |
| MSTRG. 10523.1  | 89   | 0.31603 | 8.522766113 | 1  |
| MSTRG. 10524.1  | 30   | 0.31833 | 6.476989746 | -1 |
| MSTRG. 10525.1  | 125  | 0.30632 | 9.72869873  | 1  |



|                 |      |          |              |    |
|-----------------|------|----------|--------------|----|
| MSTRG. 10526. 3 | 235  | 0. 40891 | 4. 91192627  | 1  |
| MSTRG. 10526. 5 | 234  | 0. 35883 | 5. 063659668 | 1  |
| MSTRG. 10539. 3 | 49   | 0. 28191 | 8. 421081543 | 1  |
| MSTRG. 10539. 4 | 100  | 0. 28643 | 8. 541809082 | 1  |
| MSTRG. 10542. 1 | 48   | 0. 32052 | 4. 670471191 | 1  |
| MSTRG. 10542. 2 | 107  | 0. 34526 | 5. 359680176 | 1  |
| MSTRG. 10543. 1 | 41   | 0. 36901 | 8. 536071777 | 1  |
| MSTRG. 10573. 1 | 63   | 0. 36783 | 11. 39508057 | 1  |
| MSTRG. 10577. 1 | 44   | 0. 36608 | 8. 328552246 | -1 |
| MSTRG. 10582. 1 | 51   | 0. 26931 | 7. 769470215 | 1  |
| MSTRG. 10583. 1 | 111  | 0. 32513 | 9. 995788574 | 1  |
| MSTRG. 10584. 1 | 47   | 0. 35163 | 8. 738220215 | 1  |
| MSTRG. 10590. 2 | 134  | 0. 45537 | 5. 596496582 | 1  |
| MSTRG. 10590. 3 | 166  | 0. 27994 | 10. 42144775 | 1  |
| MSTRG. 10595. 3 | 465  | 0. 33994 | 8. 780578613 | 1  |
| MSTRG. 10595. 4 | 433  | 0. 33994 | 8. 687805176 | 1  |
| MSTRG. 10595. 5 | 433  | 0. 33035 | 8. 687805176 | 1  |
| MSTRG. 10595. 6 | 433  | 0. 31965 | 8. 687805176 | 1  |
| MSTRG. 10595. 7 | 465  | 0. 36072 | 8. 780578613 | 1  |
| MSTRG. 10604. 1 | 54   | 0. 3724  | 6. 356506348 | 1  |
| MSTRG. 10633. 2 | 370  | 0. 40125 | 5. 961120605 | 1  |
| MSTRG. 10634. 1 | 34   | 0. 28213 | 5. 622375488 | 1  |
| MSTRG. 10635. 1 | 78   | 0. 29166 | 8. 679260254 | 1  |
| MSTRG. 10633. 3 | 141  | 0. 28035 | 8. 582580566 | 1  |
| MSTRG. 10633. 4 | 324  | 0. 3261  | 5. 463684082 | 1  |
| MSTRG. 10633. 5 | 185  | 0. 31553 | 10. 03521729 | 1  |
| MSTRG. 10636. 1 | 48   | 0. 42023 | 6. 955383301 | 1  |
| MSTRG. 10640. 1 | 144  | 0. 25609 | 10. 03643799 | 1  |
| MSTRG. 10641. 1 | 114  | 0. 31044 | 6. 999084473 | 1  |
| MSTRG. 10639. 2 | 898  | 0. 39821 | 6. 789978027 | 1  |
| MSTRG. 10642. 2 | 917  | 0. 46865 | 8. 908630371 | 1  |
| MSTRG. 10643. 1 | 111  | 0. 37149 | 6. 808654785 | 1  |
| MSTRG. 10642. 3 | 253  | 0. 42005 | 9. 467956543 | 1  |
| MSTRG. 10623. 2 | 273  | 0. 43699 | 6. 223449707 | 1  |
| MSTRG. 10623. 3 | 273  | 0. 46063 | 6. 223449707 | 1  |
| MSTRG. 10626. 2 | 1563 | 0. 47052 | 7. 09161377  | 1  |
| MSTRG. 10629. 2 | 225  | 0. 4116  | 9. 336120605 | 1  |
| MSTRG. 10629. 3 | 225  | 0. 44385 | 9. 336120605 | 1  |
| MSTRG. 10646. 1 | 87   | 0. 39723 | 7. 915466309 | 1  |
| MSTRG. 10646. 2 | 347  | 0. 45336 | 5. 438659668 | 1  |
| MSTRG. 10652. 1 | 814  | 0. 45256 | 5. 244445801 | 1  |
| MSTRG. 10653. 1 | 170  | 0. 35502 | 12. 03594971 | 1  |
| MSTRG. 10652. 5 | 304  | 0. 43093 | 4. 760192871 | 1  |
| MSTRG. 10654. 1 | 935  | 0. 4119  | 5. 731872559 | 1  |
| MSTRG. 10659. 1 | 104  | 0. 33644 | 10. 45159912 | 1  |
| MSTRG. 10659. 2 | 87   | 0. 45033 | 9. 381286621 | 1  |
| MSTRG. 10665. 1 | 448  | 0. 33225 | 7. 539367676 | 1  |
| MSTRG. 10667. 4 | 1610 | 0. 37265 | 7. 483093262 | 1  |
| MSTRG. 10667. 5 | 1710 | 0. 45915 | 6. 710754395 | 1  |
| MSTRG. 10668. 1 | 94   | 0. 30104 | 6. 50970459  | 1  |
| MSTRG. 10668. 2 | 94   | 0. 30894 | 6. 50970459  | 1  |
| MSTRG. 10680. 1 | 47   | 0. 42826 | 10. 21820068 | 1  |
| MSTRG. 10680. 2 | 47   | 0. 31981 | 10. 21820068 | 1  |
| MSTRG. 10680. 3 | 82   | 0. 35469 | 9. 069274902 | 1  |

|                  |     |          |              |    |
|------------------|-----|----------|--------------|----|
| MSTRG. 10680. 4  | 159 | 0. 29343 | 9. 595153809 | 1  |
| MSTRG. 10685. 1  | 42  | 0. 34971 | 5. 934875488 | 1  |
| MSTRG. 10688. 1  | 226 | 0. 42646 | 9. 76385498  | 1  |
| MSTRG. 10700. 2  | 106 | 0. 35773 | 9. 16986084  | 1  |
| MSTRG. 10700. 3  | 729 | 0. 46562 | 8. 840759277 | 1  |
| MSTRG. 10700. 4  | 515 | 0. 34235 | 8. 743469238 | 1  |
| MSTRG. 10701. 1  | 190 | 0. 33291 | 9. 207702637 | 1  |
| MSTRG. 10700. 5  | 277 | 0. 33598 | 9. 606140137 | 1  |
| MSTRG. 10703. 1  | 904 | 0. 41815 | 6. 050109863 | 1  |
| MSTRG. 10703. 13 | 798 | 0. 45162 | 6. 067687988 | 1  |
| MSTRG. 10713. 1  | 521 | 0. 45211 | 7. 336975098 | 1  |
| MSTRG. 10713. 5  | 374 | 0. 44279 | 5. 840881348 | 1  |
| MSTRG. 10713. 4  | 521 | 0. 47275 | 7. 336975098 | 1  |
| MSTRG. 10713. 6  | 374 | 0. 40896 | 5. 840881348 | 1  |
| MSTRG. 10715. 1  | 84  | 0. 35299 | 11. 38140869 | 1  |
| MSTRG. 10707. 1  | 55  | 0. 34725 | 10. 58660889 | 1  |
| MSTRG. 10712. 2  | 76  | 0. 27502 | 8. 857727051 | 1  |
| MSTRG. 10718. 1  | 238 | 0. 37908 | 6. 241760254 | 1  |
| MSTRG. 10725. 1  | 81  | 0. 29367 | 9. 894226074 | 1  |
| MSTRG. 10725. 2  | 81  | 0. 28467 | 9. 894226074 | 1  |
| MSTRG. 10761. 1  | 33  | 0. 31342 | 9. 694152832 | 1  |
| MSTRG. 10764. 1  | 2   | 0. 30533 | 5. 274963379 | 1  |
| MSTRG. 10766. 1  | 148 | 0. 35615 | 8. 390686035 | 1  |
| MSTRG. 10766. 2  | 148 | 0. 35615 | 8. 390686035 | 1  |
| MSTRG. 10767. 1  | 34  | 0. 46093 | 10. 95318604 | -1 |
| MSTRG. 10768. 1  | 48  | 0. 36695 | 7. 709411621 | 1  |
| MSTRG. 10769. 1  | 106 | 0. 28267 | 9. 147521973 | 1  |
| MSTRG. 10765. 1  | 184 | 0. 32638 | 9. 20526123  | 1  |
| MSTRG. 10765. 2  | 78  | 0. 33929 | 9. 547546387 | 1  |
| MSTRG. 10772. 1  | 33  | 0. 33301 | 11. 82440186 | 1  |
| MSTRG. 10775. 1  | 29  | 0. 35853 | 9. 496643066 | 1  |
| MSTRG. 10776. 1  | 71  | 0. 35422 | 4. 973327637 | 1  |
| MSTRG. 10776. 2  | 94  | 0. 28199 | 8. 354431152 | 1  |
| MSTRG. 10777. 1  | 67  | 0. 28027 | 9. 487121582 | 1  |
| MSTRG. 10774. 2  | 50  | 0. 32473 | 9. 88458252  | 1  |
| MSTRG. 10778. 1  | 330 | 0. 36597 | 8. 813293457 | -1 |
| MSTRG. 10774. 3  | 196 | 0. 34658 | 8. 021057129 | 1  |
| MSTRG. 10774. 4  | 479 | 0. 2886  | 9. 367614746 | 1  |
| MSTRG. 10774. 5  | 422 | 0. 33781 | 8. 427185059 | 1  |
| MSTRG. 10779. 1  | 113 | 0. 34079 | 8. 733337402 | 1  |
| MSTRG. 10774. 6  | 110 | 0. 29319 | 9. 032775879 | 1  |
| MSTRG. 10780. 1  | 104 | 0. 3372  | 9. 136535645 | 1  |
| MSTRG. 10782. 1  | 44  | 0. 386   | 8. 633850098 | 1  |
| MSTRG. 10786. 2  | 452 | 0. 46548 | 5. 705993652 | 1  |
| MSTRG. 10786. 4  | 455 | 0. 3404  | 8. 500305176 | 1  |
| MSTRG. 10787. 1  | 254 | 0. 28982 | 8. 520568848 | 1  |
| MSTRG. 10789. 1  | 152 | 0. 32453 | 9. 363830566 | 1  |
| MSTRG. 10790. 1  | 80  | 0. 29776 | 9. 020812988 | 1  |
| MSTRG. 10791. 1  | 111 | 0. 30191 | 8. 635681152 | 1  |
| MSTRG. 10792. 1  | 76  | 0. 31873 | 9. 333679199 | 1  |
| MSTRG. 10793. 3  | 709 | 0. 45808 | 4. 297424316 | 1  |
| MSTRG. 10793. 2  | 709 | 0. 3961  | 4. 297424316 | 1  |
| MSTRG. 10794. 1  | 97  | 0. 36792 | 9. 846862793 | 1  |
| MSTRG. 10794. 2  | 68  | 0. 36836 | 8. 019104004 | 1  |

|                 |      |          |              |    |
|-----------------|------|----------|--------------|----|
| MSTRG. 10795. 4 | 1096 | 0. 33518 | 7. 084777832 | 1  |
| MSTRG. 10795. 5 | 1096 | 0. 34103 | 7. 084777832 | 1  |
| MSTRG. 10796. 1 | 19   | 0. 33786 | 7. 999816895 | 1  |
| MSTRG. 10806. 4 | 544  | 0. 40569 | 7. 971740723 | 1  |
| MSTRG. 10807. 1 | 128  | 0. 30956 | 8. 270446777 | 1  |
| MSTRG. 10808. 2 | 346  | 0. 36932 | 9. 183532715 | 1  |
| MSTRG. 10808. 5 | 161  | 0. 30581 | 9. 848571777 | 1  |
| MSTRG. 10808. 6 | 205  | 0. 28982 | 6. 142883301 | 1  |
| MSTRG. 10808. 7 | 381  | 0. 36932 | 7. 734558105 | 1  |
| MSTRG. 10809. 1 | 61   | 0. 33779 | 5. 285827637 | 1  |
| MSTRG. 10811. 1 | 41   | 0. 33294 | 6. 04107666  | -1 |
| MSTRG. 10812. 1 | 95   | 0. 44589 | 10. 67352295 | -1 |
| MSTRG. 10820. 1 | 266  | 0. 39195 | 4. 750183105 | 1  |
| MSTRG. 10825. 1 | 208  | 0. 25541 | 5. 607116699 | 1  |
| MSTRG. 10830. 1 | 118  | 0. 38464 | 9. 726623535 | 1  |
| MSTRG. 10831. 1 | 86   | 0. 30492 | 7. 785827637 | 1  |
| MSTRG. 10829. 4 | 208  | 0. 29539 | 4. 467590332 | 1  |
| MSTRG. 10829. 5 | 185  | 0. 32743 | 10. 29071045 | 1  |
| MSTRG. 10837. 1 | 636  | 0. 47042 | 7. 922790527 | 1  |
| MSTRG. 10837. 2 | 493  | 0. 4529  | 6. 058654785 | 1  |
| MSTRG. 10837. 4 | 301  | 0. 3896  | 6. 549987793 | 1  |
| MSTRG. 10838. 1 | 48   | 0. 31996 | 9. 69708252  | 1  |
| MSTRG. 10840. 2 | 840  | 0. 4323  | 8. 957092285 | 1  |
| MSTRG. 10840. 3 | 132  | 0. 2785  | 7. 54876709  | -1 |
| MSTRG. 10843. 5 | 176  | 0. 29607 | 5. 696594238 | 1  |
| MSTRG. 10844. 2 | 343  | 0. 38439 | 9. 348083496 | 1  |
| MSTRG. 10844. 1 | 342  | 0. 32266 | 8. 940979004 | 1  |
| MSTRG. 10845. 1 | 153  | 0. 32253 | 5. 879089355 | 1  |
| MSTRG. 10847. 1 | 109  | 0. 38802 | 11. 00006104 | 1  |
| MSTRG. 10848. 2 | 351  | 0. 40497 | 6. 386535645 | 1  |
| MSTRG. 10848. 3 | 390  | 0. 39053 | 6. 154724121 | 1  |
| MSTRG. 10848. 4 | 324  | 0. 44677 | 6. 380554199 | 1  |
| MSTRG. 10851. 3 | 400  | 0. 37206 | 4. 979309082 | 1  |
| MSTRG. 10852. 1 | 32   | 0. 43641 | 4. 136901855 | 1  |
| MSTRG. 10853. 1 | 67   | 0. 42892 | 9. 871765137 | 1  |
| MSTRG. 10857. 1 | 41   | 0. 36926 | 4. 749206543 | 1  |
| MSTRG. 10867. 3 | 383  | 0. 32149 | 9. 105163574 | 1  |
| MSTRG. 10876. 7 | 360  | 0. 42545 | 5. 143249512 | 1  |
| MSTRG. 10876. 8 | 360  | 0. 42917 | 5. 143249512 | 1  |
| MSTRG. 10876. 6 | 401  | 0. 46145 | 6. 234680176 | 1  |
| MSTRG. 10880. 3 | 726  | 0. 4303  | 5. 808898926 | 1  |
| MSTRG. 10882. 1 | 130  | 0. 34554 | 9. 794494629 | 1  |
| MSTRG. 10882. 2 | 755  | 0. 42555 | 8. 237243652 | 1  |
| MSTRG. 10882. 4 | 772  | 0. 40301 | 8. 338806152 | 1  |
| MSTRG. 10882. 5 | 684  | 0. 46855 | 6. 275939941 | 1  |
| MSTRG. 10882. 6 | 701  | 0. 43365 | 8. 117492676 | 1  |
| MSTRG. 10882. 7 | 755  | 0. 41359 | 8. 285827637 | 1  |
| MSTRG. 10882. 8 | 54   | 0. 2908  | 8. 581604004 | 1  |
| MSTRG. 10888. 2 | 268  | 0. 43754 | 5. 98626709  | 1  |
| MSTRG. 10888. 4 | 421  | 0. 47046 | 8. 309875488 | 1  |
| MSTRG. 10889. 1 | 107  | 0. 28842 | 10. 01641846 | 1  |
| MSTRG. 10889. 2 | 131  | 0. 39365 | 9. 232727051 | 1  |
| MSTRG. 10890. 1 | 71   | 0. 4054  | 12. 07952881 | 1  |
| MSTRG. 10889. 5 | 172  | 0. 27911 | 8. 663024902 | 1  |

|                 |      |          |              |    |
|-----------------|------|----------|--------------|----|
| MSTRG. 10889. 7 | 168  | 0. 28338 | 6. 890197754 | 1  |
| MSTRG. 10889. 8 | 241  | 0. 2785  | 7. 815612793 | 1  |
| MSTRG. 10889. 9 | 233  | 0. 36231 | 9. 642150879 | 1  |
| MSTRG. 10899. 1 | 250  | 0. 31099 | 6. 191833496 | 1  |
| MSTRG. 10901. 1 | 150  | 0. 30092 | 8. 183776855 | 1  |
| MSTRG. 10902. 1 | 123  | 0. 29919 | 7. 855773926 | 1  |
| MSTRG. 10903. 1 | 145  | 0. 3     | 8. 033508301 | 1  |
| MSTRG. 10896. 2 | 195  | 0. 42773 | 8. 069152832 | 1  |
| MSTRG. 10896. 3 | 250  | 0. 40797 | 8. 688659668 | 1  |
| MSTRG. 10906. 1 | 109  | 0. 32799 | 8. 769958496 | 1  |
| MSTRG. 10907. 2 | 309  | 0. 4684  | 8. 928161621 | 1  |
| MSTRG. 10907. 3 | 157  | 0. 43219 | 9. 264953613 | 1  |
| MSTRG. 10910. 1 | 31   | 0. 42051 | 8. 842834473 | 1  |
| MSTRG. 10922. 3 | 1556 | 0. 42178 | 5. 410705566 | 1  |
| MSTRG. 10922. 5 | 1091 | 0. 38135 | 5. 172424316 | 1  |
| MSTRG. 10923. 1 | 45   | 0. 34504 | 6. 704406738 | 1  |
| MSTRG. 10925. 1 | 419  | 0. 31285 | 5. 805114746 | 1  |
| MSTRG. 10925. 9 | 406  | 0. 31361 | 5. 846008301 | 1  |
| MSTRG. 10928. 1 | 95   | 0. 38211 | 7. 618103027 | 1  |
| MSTRG. 10913. 1 | 82   | 0. 36956 | 10. 26470947 | 1  |
| MSTRG. 10919. 1 | 518  | 0. 32294 | 8. 854919434 | 1  |
| MSTRG. 10921. 1 | 105  | 0. 40877 | 9. 056945801 | 1  |
| MSTRG. 10935. 1 | 533  | 0. 36655 | 8. 786071777 | 1  |
| MSTRG. 10935. 2 | 547  | 0. 39249 | 8. 98260498  | 1  |
| MSTRG. 10936. 2 | 468  | 0. 39819 | 7. 179504395 | 1  |
| MSTRG. 10941. 2 | 591  | 0. 39077 | 9. 453186035 | 1  |
| MSTRG. 10942. 2 | 96   | 0. 28584 | 5. 077331543 | 1  |
| MSTRG. 10943. 1 | 37   | 0. 27911 | 10. 33221436 | 1  |
| MSTRG. 10944. 1 | 606  | 0. 35792 | 5. 963562012 | 1  |
| MSTRG. 10950. 3 | 970  | 0. 43245 | 9. 54486084  | 1  |
| MSTRG. 10950. 4 | 1037 | 0. 48149 | 9. 691223145 | 1  |
| MSTRG. 10956. 1 | 69   | 0. 33846 | 6. 528137207 | -1 |
| MSTRG. 10958. 1 | 54   | 0. 39022 | 9. 851989746 | 1  |
| MSTRG. 10961. 1 | 51   | 0. 38995 | 9. 895935059 | 1  |
| MSTRG. 10971. 1 | 54   | 0. 37929 | 6. 800231934 | -1 |
| MSTRG. 10976. 1 | 50   | 0. 4024  | 5. 285705566 | 1  |
| MSTRG. 10976. 2 | 47   | 0. 38389 | 8. 977111816 | 1  |
| MSTRG. 10976. 3 | 45   | 0. 39953 | 10. 21563721 | -1 |
| MSTRG. 10984. 1 | 544  | 0. 45309 | 5. 539245605 | 1  |
| MSTRG. 10984. 3 | 77   | 0. 28682 | 4. 394348145 | 1  |
| MSTRG. 10990. 4 | 136  | 0. 28584 | 8. 88067627  | 1  |
| MSTRG. 10990. 3 | 124  | 0. 29772 | 8. 765441895 | 1  |
| MSTRG. 10990. 5 | 81   | 0. 27794 | 6. 513122559 | 1  |
| MSTRG. 11012. 1 | 346  | 0. 31849 | 9. 158996582 | 1  |
| MSTRG. 11012. 2 | 347  | 0. 34159 | 9. 158996582 | 1  |
| MSTRG. 11039. 1 | 96   | 0. 28982 | 9. 216125488 | 1  |
| MSTRG. 11040. 1 | 114  | 0. 31985 | 10. 84088135 | 1  |
| MSTRG. 11041. 1 | 145  | 0. 28394 | 9. 274597168 | 1  |
| MSTRG. 11042. 1 | 210  | 0. 30957 | 9. 637878418 | 1  |
| MSTRG. 11043. 1 | 184  | 0. 28068 | 10. 39141846 | 1  |
| MSTRG. 11044. 1 | 147  | 0. 35814 | 5. 088195801 | 1  |
| MSTRG. 11045. 1 | 179  | 0. 35266 | 10. 01483154 | 1  |
| MSTRG. 11046. 1 | 62   | 0. 3768  | 9. 486755371 | 1  |
| MSTRG. 11036. 2 | 388  | 0. 38439 | 5. 77911377  | 1  |

|                 |      |          |              |    |
|-----------------|------|----------|--------------|----|
| MSTRG. 11036. 1 | 617  | 0. 49086 | 5. 918762207 | 1  |
| MSTRG. 11037. 1 | 23   | 0. 41658 | 9. 387512207 | 1  |
| MSTRG. 11050. 1 | 68   | 0. 31251 | 10. 72589111 | 1  |
| MSTRG. 11050. 2 | 29   | 0. 43719 | 5. 380187988 | 1  |
| MSTRG. 11055. 1 | 102  | 0. 42713 | 9. 074401855 | 1  |
| MSTRG. 11057. 1 | 54   | 0. 439   | 9. 102355957 | -1 |
| MSTRG. 11060. 1 | 344  | 0. 45909 | 7. 767272949 | -1 |
| MSTRG. 11071. 2 | 1949 | 0. 46888 | 6. 069030762 | 1  |
| MSTRG. 11071. 3 | 1587 | 0. 46888 | 6. 326965332 | 1  |
| MSTRG. 11071. 4 | 1587 | 0. 46888 | 6. 326965332 | 1  |
| MSTRG. 11071. 5 | 1009 | 0. 35996 | 5. 455871582 | 1  |
| MSTRG. 11072. 1 | 113  | 0. 28178 | 11. 52728271 | 1  |
| MSTRG. 11073. 2 | 58   | 0. 38517 | 5. 303649902 | 1  |
| MSTRG. 11063. 1 | 447  | 0. 46785 | 5. 85333252  | 1  |
| MSTRG. 11063. 3 | 447  | 0. 4574  | 5. 85333252  | 1  |
| MSTRG. 11076. 2 | 319  | 0. 36493 | 8. 861877441 | 1  |
| MSTRG. 11100. 1 | 127  | 0. 29387 | 9. 459411621 | 1  |
| MSTRG. 11101. 1 | 120  | 0. 29374 | 8. 864807129 | 1  |
| MSTRG. 11090. 1 | 108  | 0. 34443 | 12. 44207764 | 1  |
| MSTRG. 11091. 5 | 530  | 0. 4652  | 9. 14630127  | 1  |
| MSTRG. 11091. 6 | 530  | 0. 4776  | 9. 14630127  | 1  |
| MSTRG. 11096. 2 | 355  | 0. 44514 | 5. 293273926 | 1  |
| MSTRG. 11098. 1 | 638  | 0. 3413  | 5. 934020996 | 1  |
| MSTRG. 11098. 2 | 411  | 0. 44497 | 5. 557922363 | 1  |
| MSTRG. 11103. 2 | 265  | 0. 34657 | 8. 898010254 | 1  |
| MSTRG. 11103. 3 | 111  | 0. 28922 | 7. 728820801 | 1  |
| MSTRG. 11109. 1 | 51   | 0. 37142 | 8. 032653809 | 1  |
| MSTRG. 11154. 2 | 1891 | 0. 43772 | 6. 275085449 | 1  |
| MSTRG. 11156. 1 | 99   | 0. 40618 | 11. 40924072 | -1 |
| MSTRG. 11158. 1 | 91   | 0. 28923 | 10. 07830811 | 1  |
| MSTRG. 11161. 1 | 109  | 0. 38723 | 9. 605651855 | 1  |
| MSTRG. 11161. 4 | 69   | 0. 39129 | 8. 840759277 | 1  |
| MSTRG. 11170. 1 | 174  | 0. 27967 | 5. 826599121 | 1  |
| MSTRG. 11171. 1 | 61   | 0. 32254 | 7. 835876465 | 1  |
| MSTRG. 11169. 3 | 316  | 0. 37218 | 6. 199768066 | 1  |
| MSTRG. 11177. 1 | 914  | 0. 46317 | 6. 214782715 | 1  |
| MSTRG. 11163. 2 | 58   | 0. 30639 | 6. 514831543 | 1  |
| MSTRG. 11185. 1 | 2103 | 0. 46944 | 9. 234191895 | 1  |
| MSTRG. 11186. 1 | 89   | 0. 28971 | 10. 42486572 | 1  |
| MSTRG. 11188. 3 | 680  | 0. 35595 | 7. 084777832 | 1  |
| MSTRG. 11190. 3 | 1423 | 0. 40827 | 6. 05255127  | 1  |
| MSTRG. 11191. 1 | 272  | 0. 33002 | 8. 702941895 | 1  |
| MSTRG. 11194. 2 | 101  | 0. 42449 | 9. 320861816 | 1  |
| MSTRG. 11199. 1 | 130  | 0. 28751 | 6. 563049316 | 1  |
| MSTRG. 11194. 4 | 155  | 0. 39044 | 9. 754333496 | 1  |
| MSTRG. 11230. 1 | 57   | 0. 31637 | 4. 828430176 | 1  |
| MSTRG. 11235. 1 | 337  | 0. 47026 | 5. 336120605 | 1  |
| MSTRG. 11235. 2 | 308  | 0. 32181 | 5. 575378418 | 1  |
| MSTRG. 11243. 1 | 458  | 0. 29367 | 7. 040588379 | 1  |
| MSTRG. 11243. 3 | 777  | 0. 31806 | 8. 035095215 | 1  |
| MSTRG. 11243. 6 | 44   | 0. 40413 | 5. 11932373  | 1  |
| MSTRG. 11243. 8 | 777  | 0. 37133 | 8. 035095215 | 1  |
| MSTRG. 11219. 1 | 120  | 0. 33666 | 7. 003967285 | 1  |
| MSTRG. 11226. 1 | 736  | 0. 38067 | 4. 726623535 | 1  |

|                 |      |         |             |    |
|-----------------|------|---------|-------------|----|
| MSTRG. 11226.3  | 674  | 0.41512 | 4.774963379 | 1  |
| MSTRG. 11221.1  | 38   | 0.32015 | 11.71136475 | 1  |
| MSTRG. 11221.2  | 40   | 0.45289 | 4.41229248  | 1  |
| MSTRG. 11248.3  | 1572 | 0.46515 | 6.68951416  | 1  |
| MSTRG. 11248.9  | 1478 | 0.4624  | 6.866516113 | 1  |
| MSTRG. 11248.8  | 1496 | 0.48139 | 6.77923584  | 1  |
| MSTRG. 11248.6  | 1496 | 0.47238 | 6.77923584  | 1  |
| MSTRG. 11248.7  | 1554 | 0.46515 | 6.756408691 | 1  |
| MSTRG. 11249.1  | 107  | 0.28923 | 7.704040527 | 1  |
| MSTRG. 11257.1  | 26   | 0.44079 | 6.492248535 | 1  |
| MSTRG. 11256.1  | 26   | 0.47946 | 10.4105835  | 1  |
| MSTRG. 11279.1  | 41   | 0.34996 | 6.223937988 | -1 |
| MSTRG. 11283.1  | 398  | 0.47847 | 4.719909668 | 1  |
| MSTRG. 11283.2  | 398  | 0.49116 | 4.719909668 | 1  |
| MSTRG. 11284.1  | 104  | 0.34942 | 9.297302246 | 1  |
| MSTRG. 11292.1  | 931  | 0.44001 | 6.009094238 | 1  |
| MSTRG. 11293.1  | 62   | 0.2921  | 9.246032715 | 1  |
| MSTRG. 11294.2  | 429  | 0.3288  | 4.491760254 | 1  |
| MSTRG. 11294.3  | 98   | 0.27327 | 9.910827637 | 1  |
| MSTRG. 11294.4  | 275  | 0.33716 | 5.417907715 | 1  |
| MSTRG. 11300.3  | 270  | 0.41631 | 5.952697754 | 1  |
| MSTRG. 11301.2  | 134  | 0.2908  | 9.72869873  | 1  |
| MSTRG. 11301.1  | 125  | 0.31236 | 8.764343262 | 1  |
| MSTRG. 11301.3  | 44   | 0.33291 | 4.295837402 | 1  |
| MSTRG. 11301.4  | 134  | 0.30564 | 9.72869873  | 1  |
| MSTRG. 11301.5  | 84   | 0.31381 | 9.738830566 | 1  |
| MSTRG. 11302.1  | 134  | 0.31215 | 9.851379395 | 1  |
| MSTRG. 11302.2  | 165  | 0.31337 | 9.660217285 | -1 |
| MSTRG. 11303.1  | 26   | 0.33538 | 4.522399902 | 1  |
| MSTRG. 11304.2  | 263  | 0.36221 | 5.48651123  | 1  |
| MSTRG. 11304.3  | 254  | 0.35845 | 5.59197998  | 1  |
| MSTRG. 11373.3  | 882  | 0.47052 | 8.968444824 | 1  |
| MSTRG. 11373.4  | 121  | 0.29178 | 9.368835449 | 1  |
| MSTRG. 11373.8  | 97   | 0.30266 | 9.144348145 | 1  |
| MSTRG. 11377.1  | 1172 | 0.37058 | 6.613586426 | 1  |
| MSTRG. 11377.2  | 1197 | 0.45526 | 6.540588379 | 1  |
| MSTRG. 11378.1  | 39   | 0.30297 | 6.491027832 | 1  |
| MSTRG. 11377.3  | 1566 | 0.46224 | 6.522033691 | 1  |
| MSTRG. 11377.4  | 1292 | 0.44174 | 6.079772949 | 1  |
| MSTRG. 11377.5  | 1197 | 0.4302  | 6.540588379 | 1  |
| MSTRG. 11377.7  | 1325 | 0.47081 | 6.371887207 | -1 |
| MSTRG. 11377.6  | 1362 | 0.46697 | 6.372619629 | -1 |
| MSTRG. 11377.8  | 370  | 0.29367 | 9.362609863 | 1  |
| MSTRG. 11377.9  | 290  | 0.28719 | 9.265075684 | 1  |
| MSTRG. 11377.10 | 92   | 0.429   | 5.77532959  | 1  |
| MSTRG. 11379.1  | 64   | 0.32225 | 10.94000244 | 1  |
| MSTRG. 11377.11 | 202  | 0.2895  | 10.08111572 | 1  |
| MSTRG. 11381.1  | 109  | 0.2831  | 6.716003418 | 1  |
| MSTRG. 11382.1  | 65   | 0.32462 | 9.570861816 | 1  |
| MSTRG. 11377.18 | 279  | 0.35631 | 9.510803223 | 1  |
| MSTRG. 11377.19 | 279  | 0.28982 | 9.510803223 | 1  |
| MSTRG. 11377.20 | 279  | 0.30576 | 9.510803223 | 1  |
| MSTRG. 11377.21 | 279  | 0.36624 | 9.510803223 | 1  |
| MSTRG. 11377.22 | 35   | 0.3036  | 7.957336426 | 1  |

|                  |      |          |              |    |
|------------------|------|----------|--------------|----|
| MSTRG. 11377. 23 | 144  | 0. 27289 | 6. 946838379 | 1  |
| MSTRG. 11377. 24 | 261  | 0. 2921  | 9. 149719238 | 1  |
| MSTRG. 11377. 25 | 279  | 0. 29367 | 9. 510803223 | 1  |
| MSTRG. 11377. 26 | 84   | 0. 34523 | 9. 820007324 | 1  |
| MSTRG. 11377. 27 | 155  | 0. 31273 | 10. 35736084 | 1  |
| MSTRG. 11309. 1  | 294  | 0. 35677 | 6. 090881348 | 1  |
| MSTRG. 11307. 2  | 116  | 0. 32422 | 10. 16424561 | 1  |
| MSTRG. 11313. 1  | 133  | 0. 26797 | 8. 860168457 | 1  |
| MSTRG. 11313. 2  | 211  | 0. 28165 | 8. 864074707 | 1  |
| MSTRG. 11313. 3  | 213  | 0. 30981 | 8. 864074707 | 1  |
| MSTRG. 11313. 4  | 213  | 0. 32906 | 8. 864074707 | 1  |
| MSTRG. 11319. 1  | 68   | 0. 39965 | 8. 95489502  | 1  |
| MSTRG. 11319. 2  | 68   | 0. 33261 | 10. 13275146 | 1  |
| MSTRG. 11321. 1  | 870  | 0. 39001 | 8. 658630371 | 1  |
| MSTRG. 11326. 1  | 80   | 0. 42429 | 6. 713439941 | 1  |
| MSTRG. 11328. 2  | 418  | 0. 43253 | 8. 941101074 | 1  |
| MSTRG. 11328. 4  | 161  | 0. 27661 | 9. 204772949 | 1  |
| MSTRG. 11331. 1  | 199  | 0. 3892  | 5. 007019043 | 1  |
| MSTRG. 11335. 1  | 43   | 0. 44009 | 9. 840026855 | 1  |
| MSTRG. 11336. 2  | 507  | 0. 33785 | 7. 033996582 | 1  |
| MSTRG. 11336. 3  | 467  | 0. 37265 | 6. 075622559 | 1  |
| MSTRG. 11338. 2  | 87   | 0. 31973 | 6. 878234863 | 1  |
| MSTRG. 11338. 3  | 107  | 0. 33812 | 11. 6317749  | 1  |
| MSTRG. 11350. 1  | 3068 | 0. 39679 | 5. 944152832 | 1  |
| MSTRG. 11350. 5  | 1339 | 0. 45206 | 5. 452697754 | 1  |
| MSTRG. 11350. 6  | 682  | 0. 4305  | 5. 795593262 | 1  |
| MSTRG. 11350. 4  | 2861 | 0. 45096 | 5. 877380371 | 1  |
| MSTRG. 11350. 7  | 1983 | 0. 44615 | 6. 281311035 | 1  |
| MSTRG. 11351. 1  | 196  | 0. 31512 | 8. 584899902 | 1  |
| MSTRG. 11352. 1  | 78   | 0. 34067 | 10. 15606689 | 1  |
| MSTRG. 11350. 8  | 1225 | 0. 42581 | 6. 205505371 | 1  |
| MSTRG. 11357. 1  | 141  | 0. 39012 | 6. 06439209  | 1  |
| MSTRG. 11358. 1  | 150  | 0. 29355 | 7. 788879395 | 1  |
| MSTRG. 11359. 1  | 98   | 0. 29772 | 8. 604919434 | 1  |
| MSTRG. 11360. 1  | 109  | 0. 29772 | 9. 747619629 | 1  |
| MSTRG. 11360. 2  | 68   | 0. 29754 | 7. 762634277 | 1  |
| MSTRG. 11344. 2  | 148  | 0. 32237 | 9. 111755371 | 1  |
| MSTRG. 11345. 1  | 91   | 0. 29022 | 9. 86114502  | 1  |
| MSTRG. 11345. 2  | 189  | 0. 29206 | 10. 3793335  | 1  |
| MSTRG. 11346. 1  | 78   | 0. 38927 | 8. 535949707 | 1  |
| MSTRG. 11347. 1  | 109  | 0. 27433 | 9. 623596191 | -1 |
| MSTRG. 11348. 3  | 209  | 0. 35655 | 10. 18292236 | 1  |
| MSTRG. 11363. 1  | 48   | 0. 29415 | 6. 216125488 | 1  |
| MSTRG. 11365. 1  | 108  | 0. 29772 | 7. 008850098 | 1  |
| MSTRG. 11366. 1  | 122  | 0. 29003 | 9. 260314941 | 1  |
| MSTRG. 11367. 1  | 130  | 0. 29088 | 9. 382629395 | 1  |
| MSTRG. 11367. 2  | 130  | 0. 29268 | 9. 382629395 | 1  |
| MSTRG. 11400. 1  | 770  | 0. 28338 | 6. 789733887 | 1  |
| MSTRG. 11400. 2  | 719  | 0. 3458  | 6. 520446777 | 1  |
| MSTRG. 11400. 3  | 719  | 0. 36979 | 6. 520446777 | 1  |
| MSTRG. 11400. 4  | 130  | 0. 29772 | 9. 097595215 | 1  |
| MSTRG. 11400. 5  | 287  | 0. 28338 | 6. 594177246 | 1  |
| MSTRG. 11403. 1  | 1306 | 0. 46438 | 7. 68548584  | 1  |
| MSTRG. 11404. 1  | 1348 | 0. 4517  | 7. 208312988 | 1  |

|                  |      |          |              |    |
|------------------|------|----------|--------------|----|
| MSTRG. 11404. 2  | 1526 | 0. 45213 | 7. 011535645 | 1  |
| MSTRG. 11408. 1  | 1332 | 0. 42232 | 7. 786315918 | 1  |
| MSTRG. 11410. 1  | 327  | 0. 41516 | 9. 176330566 | 1  |
| MSTRG. 11411. 1  | 133  | 0. 40986 | 9. 516906738 | -1 |
| MSTRG. 11411. 2  | 72   | 0. 40516 | 9. 836486816 | 1  |
| MSTRG. 11413. 3  | 286  | 0. 30064 | 5. 304870605 | 1  |
| MSTRG. 11413. 4  | 201  | 0. 29277 | 6. 447570801 | 1  |
| MSTRG. 11406. 3  | 348  | 0. 39175 | 9. 123962402 | 1  |
| MSTRG. 11414. 1  | 38   | 0. 27819 | 6. 822814941 | 1  |
| MSTRG. 11417. 1  | 87   | 0. 37301 | 6. 816223145 | 1  |
| MSTRG. 11417. 2  | 91   | 0. 28462 | 10. 02484131 | 1  |
| MSTRG. 11417. 3  | 86   | 0. 31332 | 9. 86541748  | -1 |
| MSTRG. 11417. 4  | 91   | 0. 33842 | 10. 02484131 | 1  |
| MSTRG. 11418. 4  | 1131 | 0. 44818 | 8. 915222168 | 1  |
| MSTRG. 11427. 1  | 2986 | 0. 47657 | 4. 746643066 | 1  |
| MSTRG. 11427. 3  | 3035 | 0. 47576 | 4. 769714355 | 1  |
| MSTRG. 11427. 4  | 2919 | 0. 47657 | 4. 761535645 | 1  |
| MSTRG. 11429. 1  | 1167 | 0. 44835 | 7. 077941895 | 1  |
| MSTRG. 11430. 1  | 79   | 0. 33768 | 10. 60577393 | 1  |
| MSTRG. 11431. 2  | 1237 | 0. 38518 | 6. 701843262 | 1  |
| MSTRG. 11431. 3  | 1237 | 0. 36208 | 6. 701843262 | 1  |
| MSTRG. 11432. 1  | 548  | 0. 39956 | 8. 49041748  | 1  |
| MSTRG. 11433. 1  | 37   | 0. 39016 | 11. 69903564 | 1  |
| MSTRG. 11436. 1  | 123  | 0. 36531 | 7. 487487793 | 1  |
| MSTRG. 11436. 2  | 103  | 0. 35783 | 6. 005310059 | 1  |
| MSTRG. 11437. 3  | 250  | 0. 43613 | 5. 316589355 | 1  |
| MSTRG. 11438. 1  | 284  | 0. 42882 | 4. 630187988 | 1  |
| MSTRG. 11439. 3  | 2541 | 0. 44677 | 5. 805847168 | 1  |
| MSTRG. 11441. 4  | 351  | 0. 37068 | 5. 28314209  | 1  |
| MSTRG. 11441. 2  | 555  | 0. 39304 | 5. 505065918 | 1  |
| MSTRG. 11441. 3  | 475  | 0. 37254 | 6. 602722168 | 1  |
| MSTRG. 11442. 1  | 56   | 0. 34012 | 9. 680847168 | 1  |
| MSTRG. 11443. 4  | 394  | 0. 40135 | 5. 909729004 | 1  |
| MSTRG. 11443. 5  | 394  | 0. 35378 | 5. 909729004 | 1  |
| MSTRG. 11443. 7  | 394  | 0. 39683 | 5. 909729004 | 1  |
| MSTRG. 11443. 8  | 394  | 0. 37428 | 5. 909729004 | 1  |
| MSTRG. 11443. 6  | 394  | 0. 32812 | 5. 909729004 | 1  |
| MSTRG. 11421. 3  | 64   | 0. 4404  | 11. 78961182 | 1  |
| MSTRG. 11423. 1  | 204  | 0. 35034 | 7. 113464355 | 1  |
| MSTRG. 11424. 2  | 774  | 0. 41622 | 8. 833557129 | 1  |
| MSTRG. 11449. 2  | 75   | 0. 34181 | 4. 51739502  | 1  |
| MSTRG. 11457. 1  | 213  | 0. 31806 | 4. 442321777 | 1  |
| MSTRG. 11457. 2  | 213  | 0. 34184 | 4. 442321777 | 1  |
| MSTRG. 11457. 3  | 163  | 0. 42886 | 4. 340270996 | 1  |
| MSTRG. 11460. 1  | 95   | 0. 35505 | 6. 784362793 | 1  |
| MSTRG. 11462. 12 | 432  | 0. 35516 | 7. 38482666  | 1  |
| MSTRG. 11462. 7  | 464  | 0. 38186 | 7. 393981934 | 1  |
| MSTRG. 11462. 8  | 514  | 0. 38116 | 7. 406311035 | 1  |
| MSTRG. 11462. 9  | 432  | 0. 37166 | 7. 38482666  | 1  |
| MSTRG. 11462. 13 | 432  | 0. 41303 | 7. 38482666  | 1  |
| MSTRG. 11462. 14 | 474  | 0. 35633 | 7. 394958496 | 1  |
| MSTRG. 11462. 15 | 74   | 0. 27558 | 9. 506408691 | 1  |
| MSTRG. 11463. 1  | 53   | 0. 34857 | 9. 694152832 | 1  |
| MSTRG. 11464. 1  | 77   | 0. 29367 | 6. 55267334  | 1  |



|                  |      |          |              |    |
|------------------|------|----------|--------------|----|
| MSTRG. 11465. 1  | 48   | 0. 42299 | 6. 467468262 | 1  |
| MSTRG. 11466. 1  | 650  | 0. 46534 | 8. 789611816 | 1  |
| MSTRG. 11466. 2  | 650  | 0. 35257 | 8. 789611816 | 1  |
| MSTRG. 11472. 1  | 546  | 0. 37678 | 8. 071716309 | 1  |
| MSTRG. 11472. 4  | 253  | 0. 50282 | 4. 364196777 | 1  |
| MSTRG. 11472. 2  | 546  | 0. 39404 | 8. 071716309 | 1  |
| MSTRG. 11472. 5  | 236  | 0. 38176 | 4. 376037598 | 1  |
| MSTRG. 11472. 6  | 104  | 0. 2962  | 5. 83026123  | 1  |
| MSTRG. 11472. 7  | 132  | 0. 25541 | 8. 867248535 | 1  |
| MSTRG. 11472. 8  | 119  | 0. 3136  | 4. 867248535 | 1  |
| MSTRG. 11473. 1  | 108  | 0. 31432 | 6. 955383301 | 1  |
| MSTRG. 11473. 2  | 108  | 0. 28982 | 6. 955383301 | 1  |
| MSTRG. 11473. 3  | 108  | 0. 29615 | 6. 955383301 | 1  |
| MSTRG. 11474. 1  | 75   | 0. 28555 | 10. 13238525 | 1  |
| MSTRG. 11473. 4  | 108  | 0. 29374 | 6. 955383301 | 1  |
| MSTRG. 11472. 9  | 52   | 0. 45468 | 9. 199157715 | 1  |
| MSTRG. 11472. 10 | 257  | 0. 33446 | 9. 895080566 | 1  |
| MSTRG. 11475. 1  | 183  | 0. 35869 | 10. 1494751  | 1  |
| MSTRG. 11469. 1  | 328  | 0. 38339 | 8. 453552246 | 1  |
| MSTRG. 11470. 5  | 712  | 0. 427   | 5. 901306152 | 1  |
| MSTRG. 11476. 3  | 497  | 0. 33431 | 9. 236999512 | 1  |
| MSTRG. 11476. 2  | 907  | 0. 37241 | 7. 935119629 | 1  |
| MSTRG. 11476. 4  | 479  | 0. 33675 | 9. 309753418 | 1  |
| MSTRG. 11476. 5  | 479  | 0. 33059 | 9. 309753418 | 1  |
| MSTRG. 11477. 1  | 1579 | 0. 4639  | 5. 049133301 | 1  |
| MSTRG. 11478. 1  | 92   | 0. 28338 | 9. 917907715 | 1  |
| MSTRG. 11483. 2  | 122  | 0. 42728 | 8. 878601074 | 1  |
| MSTRG. 11489. 1  | 25   | 0. 42591 | 8. 230651855 | -1 |
| MSTRG. 11490. 5  | 1594 | 0. 43295 | 5. 824401855 | 1  |
| MSTRG. 11490. 6  | 1295 | 0. 49521 | 5. 258361816 | 1  |
| MSTRG. 11496. 2  | 762  | 0. 44512 | 5. 464294434 | 1  |
| MSTRG. 11499. 2  | 287  | 0. 33695 | 8. 286682129 | 1  |
| MSTRG. 11499. 4  | 205  | 0. 34272 | 7. 515808105 | 1  |
| MSTRG. 11492. 7  | 447  | 0. 44382 | 4. 75970459  | 1  |
| MSTRG. 11492. 6  | 447  | 0. 44632 | 4. 75970459  | 1  |
| MSTRG. 11492. 9  | 491  | 0. 46516 | 4. 902282715 | 1  |
| MSTRG. 11492. 11 | 447  | 0. 4683  | 4. 75970459  | 1  |
| MSTRG. 11492. 12 | 491  | 0. 43957 | 4. 902282715 | 1  |
| MSTRG. 11492. 5  | 447  | 0. 4407  | 4. 75970459  | 1  |
| MSTRG. 11492. 8  | 447  | 0. 44415 | 4. 75970459  | 1  |
| MSTRG. 11492. 10 | 447  | 0. 44754 | 4. 75970459  | 1  |
| MSTRG. 11492. 4  | 447  | 0. 44936 | 4. 75970459  | 1  |
| MSTRG. 11505. 1  | 261  | 0. 49144 | 3. 950866699 | 1  |
| MSTRG. 11505. 2  | 182  | 0. 4348  | 11. 89837646 | 1  |
| MSTRG. 11507. 1  | 122  | 0. 31889 | 9. 842712402 | 1  |
| MSTRG. 11507. 6  | 284  | 0. 29728 | 8. 081970215 | 1  |
| MSTRG. 11507. 8  | 167  | 0. 31714 | 8. 947692871 | 1  |
| MSTRG. 11507. 3  | 284  | 0. 36987 | 8. 081970215 | 1  |
| MSTRG. 11507. 7  | 167  | 0. 31714 | 8. 947692871 | 1  |
| MSTRG. 11507. 2  | 284  | 0. 28195 | 8. 081970215 | 1  |
| MSTRG. 11507. 4  | 284  | 0. 32018 | 8. 081970215 | 1  |
| MSTRG. 11507. 9  | 167  | 0. 32018 | 8. 947692871 | 1  |
| MSTRG. 11508. 1  | 525  | 0. 37343 | 7. 987609863 | 1  |
| MSTRG. 11508. 4  | 215  | 0. 28536 | 6. 028137207 | 1  |

|                 |      |         |             |    |
|-----------------|------|---------|-------------|----|
| MSTRG. 11508.5  | 531  | 0.49547 | 7.987609863 | 1  |
| MSTRG. 11510.1  | 94   | 0.32246 | 7.799865723 | 1  |
| MSTRG. 11513.1  | 416  | 0.4545  | 9.477600098 | 1  |
| MSTRG. 11514.1  | 37   | 0.3396  | 10.41986084 | 1  |
| MSTRG. 11514.2  | 42   | 0.35572 | 5.601501465 | -1 |
| MSTRG. 11515.1  | 177  | 0.41488 | 5.95489502  | -1 |
| MSTRG. 11520.1  | 1372 | 0.45825 | 4.757385254 | 1  |
| MSTRG. 11534.1  | 417  | 0.39133 | 5.106750488 | 1  |
| MSTRG. 11537.1  | 183  | 0.32896 | 10.16326904 | 1  |
| MSTRG. 11539.3  | 579  | 0.37251 | 9.706604004 | 1  |
| MSTRG. 11540.4  | 150  | 0.41152 | 10.04119873 | 1  |
| MSTRG. 11530.2  | 232  | 0.37042 | 9.46697998  | 1  |
| MSTRG. 11551.1  | 165  | 0.29096 | 11.47283936 | 1  |
| MSTRG. 11551.2  | 165  | 0.31173 | 11.47283936 | 1  |
| MSTRG. 11553.1  | 313  | 0.4687  | 6.582092285 | 1  |
| MSTRG. 11549.5  | 43   | 0.30706 | 10.8838501  | 1  |
| MSTRG. 11549.4  | 113  | 0.27739 | 10.91851807 | 1  |
| MSTRG. 11542.1  | 223  | 0.30085 | 8.751159668 | 1  |
| MSTRG. 11545.1  | 143  | 0.28085 | 7.527770996 | 1  |
| MSTRG. 11556.2  | 109  | 0.38122 | 10.10540771 | 1  |
| MSTRG. 11560.1  | 66   | 0.40038 | 9.156188965 | 1  |
| MSTRG. 11568.1  | 263  | 0.43938 | 9.141906738 | 1  |
| MSTRG. 11570.1  | 63   | 0.32324 | 4.196350098 | 1  |
| MSTRG. 11571.1  | 41   | 0.43325 | 6.542663574 | 1  |
| MSTRG. 11584.1  | 83   | 0.39939 | 12.12982178 | 1  |
| MSTRG. 11586.1  | 190  | 0.37593 | 11.08648682 | 1  |
| MSTRG. 11589.2  | 735  | 0.39602 | 5.885803223 | 1  |
| MSTRG. 11590.3  | 283  | 0.47127 | 5.149475098 | 1  |
| MSTRG. 11591.2  | 969  | 0.37874 | 9.149353027 | 1  |
| MSTRG. 11594.3  | 725  | 0.33182 | 9.043884277 | 1  |
| MSTRG. 11595.1  | 90   | 0.40194 | 6.820983887 | 1  |
| MSTRG. 11595.2  | 49   | 0.40194 | 5.366882324 | 1  |
| MSTRG. 11594.4  | 725  | 0.35344 | 9.043884277 | 1  |
| MSTRG. 11606.4  | 901  | 0.45683 | 5.18572998  | 1  |
| MSTRG. 11606.10 | 915  | 0.48287 | 5.121154785 | 1  |
| MSTRG. 11599.1  | 729  | 0.46206 | 6.446350098 | 1  |
| MSTRG. 11599.2  | 299  | 0.44096 | 9.166564941 | 1  |
| MSTRG. 11610.1  | 62   | 0.45998 | 12.14752197 | 1  |
| MSTRG. 11610.2  | 62   | 0.47635 | 12.14752197 | 1  |
| MSTRG. 11611.2  | 616  | 0.3606  | 8.442932129 | 1  |
| MSTRG. 11611.4  | 608  | 0.3088  | 8.442932129 | 1  |
| MSTRG. 11613.1  | 40   | 0.37611 | 3.895446777 | 1  |
| MSTRG. 11615.1  | 338  | 0.41273 | 9.405700684 | 1  |
| MSTRG. 11616.1  | 26   | 0.33907 | 5.222351074 | 1  |
| MSTRG. 11618.2  | 243  | 0.32858 | 9.109924316 | 1  |
| MSTRG. 11617.1  | 83   | 0.43829 | 6.707946777 | 1  |
| MSTRG. 11622.1  | 106  | 0.28248 | 8.810852051 | 1  |
| MSTRG. 11622.2  | 71   | 0.37374 | 5.25177002  | -1 |
| MSTRG. 11636.2  | 581  | 0.43112 | 7.965393066 | 1  |
| MSTRG. 11643.2  | 83   | 0.30894 | 6.698913574 | 1  |
| MSTRG. 11643.3  | 447  | 0.40635 | 5.819396973 | 1  |
| MSTRG. 11643.4  | 288  | 0.39902 | 6.157775879 | 1  |
| MSTRG. 11645.1  | 22   | 0.36227 | 6.50567627  | 1  |
| MSTRG. 11646.1  | 219  | 0.33652 | 5.515808105 | 1  |

|                |      |         |             |    |
|----------------|------|---------|-------------|----|
| MSTRG. 11649.4 | 428  | 0.38056 | 8.118591309 | 1  |
| MSTRG. 11656.3 | 538  | 0.47676 | 5.884460449 | 1  |
| MSTRG. 11657.2 | 260  | 0.3263  | 5.664001465 | 1  |
| MSTRG. 11662.1 | 100  | 0.34362 | 6.002502441 | 1  |
| MSTRG. 11663.4 | 152  | 0.38163 | 10.44671631 | 1  |
| MSTRG. 11663.3 | 115  | 0.41742 | 9.061462402 | 1  |
| MSTRG. 11664.2 | 36   | 0.3761  | 7.999572754 | 1  |
| MSTRG. 11666.1 | 190  | 0.31588 | 9.261657715 | 1  |
| MSTRG. 11666.5 | 185  | 0.31429 | 9.140686035 | 1  |
| MSTRG. 11666.3 | 185  | 0.35975 | 9.140686035 | 1  |
| MSTRG. 11666.4 | 309  | 0.41294 | 10.08624268 | 1  |
| MSTRG. 11659.1 | 60   | 0.35658 | 9.969055176 | 1  |
| MSTRG. 11659.2 | 71   | 0.34922 | 9.160827637 | 1  |
| MSTRG. 11659.3 | 55   | 0.38146 | 6.518981934 | 1  |
| MSTRG. 11659.4 | 195  | 0.28567 | 10.67230225 | 1  |
| MSTRG. 11674.2 | 60   | 0.39549 | 5.049377441 | 1  |
| MSTRG. 11675.1 | 219  | 0.44554 | 4.68170166  | 1  |
| MSTRG. 11675.3 | 152  | 0.46853 | 4.419616699 | -1 |
| MSTRG. 11676.3 | 641  | 0.36337 | 9.090515137 | 1  |
| MSTRG. 11678.1 | 103  | 0.3345  | 9.811218262 | 1  |
| MSTRG. 11678.5 | 143  | 0.35997 | 5.573669434 | 1  |
| MSTRG. 11678.3 | 159  | 0.32797 | 6.046813965 | 1  |
| MSTRG. 11679.1 | 110  | 0.33731 | 9.09967041  | 1  |
| MSTRG. 11680.1 | 1115 | 0.38195 | 6.808044434 | 1  |
| MSTRG. 11680.3 | 1138 | 0.38347 | 6.589416504 | 1  |
| MSTRG. 11677.3 | 447  | 0.35031 | 9.141174316 | 1  |
| MSTRG. 11683.1 | 502  | 0.41373 | 5.04864502  | 1  |
| MSTRG. 11684.1 | 850  | 0.29075 | 5.723693848 | 1  |
| MSTRG. 11684.4 | 1429 | 0.36257 | 6.530212402 | 1  |
| MSTRG. 11687.2 | 266  | 0.37028 | 8.692565918 | 1  |
| MSTRG. 11696.1 | 104  | 0.36537 | 10.10748291 | 1  |
| MSTRG. 11697.1 | 187  | 0.39696 | 10.15863037 | 1  |
| MSTRG. 11697.2 | 241  | 0.4261  | 10.38018799 | 1  |
| MSTRG. 11702.1 | 1226 | 0.43552 | 7.800964355 | 1  |
| MSTRG. 11702.3 | 1254 | 0.4616  | 7.45892334  | 1  |
| MSTRG. 11703.1 | 44   | 0.40594 | 5.258850098 | -1 |
| MSTRG. 11707.1 | 186  | 0.35033 | 9.115661621 | 1  |
| MSTRG. 11708.1 | 65   | 0.34597 | 4.11932373  | 1  |
| MSTRG. 11708.2 | 82   | 0.33114 | 9.609924316 | 1  |
| MSTRG. 11717.1 | 331  | 0.38091 | 5.292907715 | 1  |
| MSTRG. 11724.2 | 463  | 0.45095 | 5.324768066 | 1  |
| MSTRG. 11724.7 | 439  | 0.46184 | 5.601501465 | 1  |
| MSTRG. 11724.6 | 463  | 0.42872 | 5.324768066 | 1  |
| MSTRG. 11727.1 | 86   | 0.38679 | 10.72003174 | 1  |
| MSTRG. 11728.1 | 476  | 0.32265 | 6.00592041  | 1  |
| MSTRG. 11731.1 | 33   | 0.34725 | 4.669494629 | -1 |
| MSTRG. 11738.1 | 725  | 0.47705 | 6.612976074 | 1  |
| MSTRG. 11738.3 | 338  | 0.40219 | 9.025085449 | 1  |
| MSTRG. 11738.4 | 160  | 0.27433 | 9.778503418 | 1  |
| MSTRG. 11738.6 | 128  | 0.30419 | 9.425476074 | 1  |
| MSTRG. 11738.7 | 338  | 0.25541 | 9.025085449 | 1  |
| MSTRG. 11738.8 | 548  | 0.41578 | 8.908508301 | 1  |
| MSTRG. 11738.9 | 424  | 0.40575 | 8.19317627  | 1  |
| MSTRG. 11734.3 | 405  | 0.40355 | 4.817199707 | 1  |

|                 |      |         |             |    |
|-----------------|------|---------|-------------|----|
| MSTRG. 11737.2  | 76   | 0.42634 | 9.335754395 | 1  |
| MSTRG. 11739.1  | 129  | 0.37187 | 9.194641113 | 1  |
| MSTRG. 11745.7  | 861  | 0.44409 | 5.680480957 | 1  |
| MSTRG. 11745.8  | 74   | 0.32314 | 9.071105957 | 1  |
| MSTRG. 11746.1  | 165  | 0.41766 | 9.16998291  | 1  |
| MSTRG. 11747.1  | 78   | 0.33207 | 6.995300293 | 1  |
| MSTRG. 11763.3  | 67   | 0.35027 | 9.505065918 | 1  |
| MSTRG. 11763.4  | 533  | 0.41771 | 6.472229004 | 1  |
| MSTRG. 11764.1  | 97   | 0.34197 | 9.399597168 | 1  |
| MSTRG. 11763.5  | 67   | 0.37854 | 4.351989746 | 1  |
| MSTRG. 11765.1  | 84   | 0.34387 | 8.63458252  | 1  |
| MSTRG. 11763.7  | 78   | 0.39969 | 12.08441162 | 1  |
| MSTRG. 11756.2  | 1303 | 0.42714 | 5.951965332 | 1  |
| MSTRG. 11756.6  | 1336 | 0.46361 | 6.164001465 | 1  |
| MSTRG. 11761.1  | 64   | 0.32414 | 6.807067871 | 1  |
| MSTRG. 11782.1  | 189  | 0.27617 | 9.780700684 | 1  |
| MSTRG. 11783.1  | 138  | 0.3634  | 5.409606934 | 1  |
| MSTRG. 11783.4  | 88   | 0.35145 | 11.28814697 | 1  |
| MSTRG. 11783.3  | 75   | 0.39505 | 9.694885254 | 1  |
| MSTRG. 11792.1  | 453  | 0.33974 | 8.780334473 | 1  |
| MSTRG. 11792.3  | 416  | 0.37828 | 8.485168457 | 1  |
| MSTRG. 11792.2  | 491  | 0.38027 | 8.504699707 | 1  |
| MSTRG. 11792.4  | 492  | 0.46003 | 9.08013916  | 1  |
| MSTRG. 11792.13 | 86   | 0.29115 | 5.332946777 | 1  |
| MSTRG. 11793.1  | 46   | 0.35383 | 5.617248535 | 1  |
| MSTRG. 11794.1  | 114  | 0.32608 | 5.718444824 | 1  |
| MSTRG. 11785.1  | 113  | 0.31269 | 11.31427002 | 1  |
| MSTRG. 11786.2  | 155  | 0.47819 | 4.520568848 | -1 |
| MSTRG. 11788.1  | 334  | 0.48136 | 6.552307129 | 1  |
| MSTRG. 11788.2  | 334  | 0.4539  | 6.552307129 | 1  |
| MSTRG. 11788.4  | 334  | 0.47812 | 6.552307129 | 1  |
| MSTRG. 11795.1  | 49   | 0.39421 | 7.941833496 | 1  |
| MSTRG. 11805.1  | 40   | 0.47316 | 7.761535645 | -1 |
| MSTRG. 11806.1  | 1161 | 0.46835 | 6.590148926 | 1  |
| MSTRG. 11807.1  | 58   | 0.30529 | 8.552062988 | -1 |
| MSTRG. 11810.2  | 299  | 0.36024 | 5.433898926 | 1  |
| MSTRG. 11814.4  | 412  | 0.44908 | 5.020935059 | -1 |
| MSTRG. 11800.1  | 62   | 0.36742 | 11.43890381 | -1 |
| MSTRG. 11802.3  | 117  | 0.39221 | 9.88494873  | 1  |
| MSTRG. 11802.4  | 145  | 0.39282 | 9.272277832 | 1  |
| MSTRG. 11802.5  | 120  | 0.35998 | 6.039245605 | 1  |
| MSTRG. 11820.3  | 488  | 0.39866 | 9.385681152 | 1  |
| MSTRG. 11819.1  | 78   | 0.37527 | 6.519592285 | 1  |
| MSTRG. 11834.2  | 411  | 0.47255 | 6.853942871 | 1  |
| MSTRG. 11834.3  | 228  | 0.44321 | 7.487487793 | 1  |
| MSTRG. 11838.1  | 188  | 0.32803 | 9.743225098 | 1  |
| MSTRG. 11841.4  | 47   | 0.32296 | 7.835510254 | 1  |
| MSTRG. 11842.3  | 1343 | 0.37818 | 9.376647949 | 1  |
| MSTRG. 11842.6  | 913  | 0.34503 | 9.391906738 | 1  |
| MSTRG. 11821.2  | 163  | 0.3231  | 5.704406738 | 1  |
| MSTRG. 11824.2  | 154  | 0.28415 | 9.599304199 | 1  |
| MSTRG. 11824.3  | 154  | 0.28415 | 9.599304199 | 1  |
| MSTRG. 11824.4  | 121  | 0.28415 | 10.43548584 | 1  |
| MSTRG. 11824.5  | 154  | 0.28923 | 9.599304199 | 1  |

|                 |     |          |              |    |
|-----------------|-----|----------|--------------|----|
| MSTRG. 11825. 3 | 281 | 0. 37818 | 8. 861877441 | 1  |
| MSTRG. 11825. 4 | 384 | 0. 39169 | 8. 701721191 | 1  |
| MSTRG. 11827. 1 | 41  | 0. 35506 | 11. 71136475 | 1  |
| MSTRG. 11827. 3 | 52  | 0. 38056 | 7. 998718262 | 1  |
| MSTRG. 11827. 2 | 47  | 0. 35789 | 9. 102600098 | 1  |
| MSTRG. 11828. 1 | 61  | 0. 38676 | 10. 16595459 | -1 |
| MSTRG. 11847. 2 | 462 | 0. 45399 | 6. 941955566 | 1  |
| MSTRG. 11852. 1 | 294 | 0. 34706 | 9. 643005371 | 1  |
| MSTRG. 11852. 2 | 191 | 0. 39776 | 6. 629333496 | 1  |
| MSTRG. 11852. 3 | 339 | 0. 41796 | 9. 491149902 | 1  |
| MSTRG. 11852. 4 | 110 | 0. 30132 | 5. 891174316 | 1  |
| MSTRG. 11852. 5 | 110 | 0. 30981 | 5. 891174316 | 1  |
| MSTRG. 11860. 1 | 67  | 0. 37222 | 5. 587097168 | 1  |
| MSTRG. 11861. 1 | 368 | 0. 46773 | 9. 189880371 | 1  |
| MSTRG. 11854. 1 | 92  | 0. 3928  | 5. 34979248  | 1  |
| MSTRG. 11867. 3 | 131 | 0. 34567 | 4. 600769043 | 1  |
| MSTRG. 11867. 4 | 53  | 0. 43559 | 9. 416687012 | 1  |
| MSTRG. 11867. 5 | 41  | 0. 3921  | 10. 46624756 | 1  |
| MSTRG. 11872. 1 | 315 | 0. 36197 | 8. 378845215 | 1  |
| MSTRG. 11873. 2 | 180 | 0. 43318 | 5. 560119629 | 1  |
| MSTRG. 11873. 4 | 223 | 0. 36087 | 9. 45489502  | 1  |
| MSTRG. 11873. 3 | 500 | 0. 39108 | 6. 211853027 | 1  |
| MSTRG. 11873. 7 | 375 | 0. 32646 | 7. 127868652 | 1  |
| MSTRG. 11873. 8 | 233 | 0. 355   | 8. 974060059 | 1  |
| MSTRG. 11873. 6 | 358 | 0. 45346 | 5. 222473145 | 1  |
| MSTRG. 11875. 1 | 8   | 0. 3461  | 3. 998840332 | 1  |
| MSTRG. 11876. 1 | 378 | 0. 39221 | 6. 266296387 | 1  |
| MSTRG. 11876. 3 | 378 | 0. 44855 | 6. 266296387 | 1  |
| MSTRG. 11882. 3 | 582 | 0. 47972 | 9. 090270996 | 1  |
| MSTRG. 11882. 4 | 582 | 0. 47972 | 9. 090270996 | 1  |
| MSTRG. 11889. 1 | 975 | 0. 47915 | 5. 70111084  | 1  |
| MSTRG. 11889. 2 | 975 | 0. 48335 | 5. 70111084  | 1  |
| MSTRG. 11890. 1 | 26  | 0. 39058 | 11. 71136475 | 1  |
| MSTRG. 11901. 1 | 99  | 0. 3684  | 9. 722106934 | 1  |
| MSTRG. 11901. 2 | 81  | 0. 30517 | 10. 47283936 | 1  |
| MSTRG. 11902. 1 | 23  | 0. 40579 | 5. 750305176 | -1 |
| MSTRG. 11923. 1 | 74  | 0. 41096 | 9. 897888184 | -1 |
| MSTRG. 11924. 1 | 36  | 0. 43707 | 6. 496643066 | -1 |
| MSTRG. 11929. 1 | 18  | 0. 36092 | 9. 34967041  | 1  |
| MSTRG. 11950. 1 | 84  | 0. 41575 | 11. 39508057 | 1  |
| MSTRG. 11951. 1 | 93  | 0. 3892  | 8. 798034668 | 1  |
| MSTRG. 11960. 1 | 75  | 0. 36212 | 10. 13238525 | 1  |
| MSTRG. 11968. 1 | 147 | 0. 29772 | 10. 73638916 | 1  |
| MSTRG. 11969. 1 | 115 | 0. 31373 | 10. 23907471 | 1  |
| MSTRG. 11970. 1 | 189 | 0. 28478 | 10. 293396   | 1  |
| MSTRG. 11973. 4 | 436 | 0. 46976 | 5. 351623535 | 1  |
| MSTRG. 11973. 3 | 417 | 0. 46976 | 5. 411437988 | 1  |
| MSTRG. 11973. 2 | 81  | 0. 42689 | 4. 93157959  | 1  |
| MSTRG. 11973. 1 | 427 | 0. 44891 | 5. 507019043 | 1  |
| MSTRG. 11974. 1 | 438 | 0. 44755 | 6. 286437988 | 1  |
| MSTRG. 11974. 2 | 438 | 0. 49495 | 6. 286437988 | 1  |
| MSTRG. 11974. 3 | 438 | 0. 48109 | 6. 286437988 | 1  |
| MSTRG. 11973. 7 | 51  | 0. 34519 | 9. 492858887 | 1  |
| MSTRG. 11973. 8 | 39  | 0. 35002 | 10. 26483154 | 1  |

|                  |      |          |              |    |
|------------------|------|----------|--------------|----|
| MSTRG. 11973. 9  | 67   | 0. 38238 | 9. 972351074 | 1  |
| MSTRG. 11973. 10 | 39   | 0. 35734 | 11. 34466553 | 1  |
| MSTRG. 11973. 11 | 45   | 0. 43315 | 6. 535583496 | 1  |
| MSTRG. 11973. 12 | 25   | 0. 36451 | 10. 66680908 | 1  |
| MSTRG. 11973. 13 | 46   | 0. 40191 | 10. 94000244 | 1  |
| MSTRG. 11973. 14 | 46   | 0. 32638 | 10. 94000244 | 1  |
| MSTRG. 11973. 15 | 63   | 0. 44646 | 9. 183410645 | 1  |
| MSTRG. 11973. 16 | 46   | 0. 30018 | 10. 94000244 | 1  |
| MSTRG. 11973. 17 | 42   | 0. 34842 | 9. 382629395 | -1 |
| MSTRG. 11973. 18 | 51   | 0. 43158 | 9. 492858887 | 1  |
| MSTRG. 11973. 19 | 17   | 0. 3623  | 10. 7366333  | 1  |
| MSTRG. 11973. 20 | 16   | 0. 42016 | 10. 7366333  | 1  |
| MSTRG. 11973. 21 | 16   | 0. 41188 | 10. 7366333  | 1  |
| MSTRG. 11973. 22 | 16   | 0. 34268 | 10. 7366333  | 1  |
| MSTRG. 11973. 23 | 17   | 0. 38448 | 8. 495544434 | 1  |
| MSTRG. 11973. 24 | 35   | 0. 40236 | 7. 977355957 | 1  |
| MSTRG. 11958. 1  | 480  | 0. 34396 | 9. 50201416  | 1  |
| MSTRG. 11958. 2  | 483  | 0. 34396 | 9. 55279541  | 1  |
| MSTRG. 11972. 1  | 130  | 0. 28648 | 10. 45098877 | 1  |
| MSTRG. 11978. 2  | 200  | 0. 4667  | 4. 963439941 | 1  |
| MSTRG. 11978. 1  | 1008 | 0. 38912 | 4. 934631348 | 1  |
| MSTRG. 11979. 1  | 57   | 0. 31729 | 5. 999816895 | 1  |
| MSTRG. 11978. 4  | 871  | 0. 33623 | 5. 233581543 | 1  |
| MSTRG. 11978. 5  | 777  | 0. 33375 | 4. 940979004 | 1  |
| MSTRG. 11985. 2  | 3115 | 0. 45396 | 5. 105407715 | 1  |
| MSTRG. 11986. 4  | 364  | 0. 39963 | 8. 863952637 | 1  |
| MSTRG. 11987. 1  | 90   | 0. 332   | 10. 11114502 | 1  |
| MSTRG. 11995. 1  | 1840 | 0. 46286 | 6. 950134277 | 1  |
| MSTRG. 11996. 1  | 113  | 0. 29131 | 9. 769836426 | 1  |
| MSTRG. 11995. 6  | 1840 | 0. 46644 | 6. 950134277 | 1  |
| MSTRG. 11995. 5  | 1250 | 0. 35797 | 7. 980041504 | 1  |
| MSTRG. 11995. 7  | 1423 | 0. 38051 | 6. 230651855 | 1  |
| MSTRG. 11995. 8  | 1423 | 0. 44307 | 6. 230651855 | 1  |
| MSTRG. 11995. 9  | 1423 | 0. 45282 | 6. 230651855 | 1  |
| MSTRG. 11991. 1  | 75   | 0. 27097 | 5. 85748291  | 1  |
| MSTRG. 11994. 2  | 343  | 0. 44991 | 8. 470031738 | 1  |
| MSTRG. 11994. 3  | 329  | 0. 45828 | 7. 651794434 | 1  |
| MSTRG. 12000. 1  | 1487 | 0. 45058 | 5. 048156738 | 1  |
| MSTRG. 12004. 5  | 465  | 0. 3349  | 9. 129577637 | 1  |
| MSTRG. 12004. 6  | 465  | 0. 31793 | 9. 129577637 | 1  |
| MSTRG. 12004. 7  | 240  | 0. 39079 | 9. 605529785 | 1  |
| MSTRG. 12004. 8  | 264  | 0. 39226 | 9. 487121582 | 1  |
| MSTRG. 12004. 9  | 454  | 0. 45654 | 9. 04864502  | 1  |
| MSTRG. 12004. 10 | 465  | 0. 46841 | 9. 129577637 | 1  |
| MSTRG. 12005. 1  | 77   | 0. 31996 | 9. 09942627  | 1  |
| MSTRG. 12004. 11 | 339  | 0. 44877 | 5. 269958496 | 1  |
| MSTRG. 12006. 4  | 395  | 0. 38425 | 5. 153625488 | 1  |
| MSTRG. 12007. 1  | 63   | 0. 31753 | 7. 08416748  | 1  |
| MSTRG. 12008. 1  | 113  | 0. 3858  | 8. 367370605 | -1 |
| MSTRG. 12009. 1  | 86   | 0. 39993 | 8. 449401855 | -1 |
| MSTRG. 12019. 2  | 82   | 0. 36129 | 10. 79107666 | 1  |
| MSTRG. 12019. 3  | 42   | 0. 36005 | 8. 633361816 | 1  |
| MSTRG. 12027. 2  | 189  | 0. 36089 | 6. 653503418 | 1  |
| MSTRG. 12023. 1  | 326  | 0. 33762 | 8. 731140137 | 1  |

|                  |      |          |              |    |
|------------------|------|----------|--------------|----|
| MSTRG. 12030. 1  | 301  | 0. 41316 | 5. 457458496 | 1  |
| MSTRG. 12030. 3  | 300  | 0. 40731 | 5. 457458496 | 1  |
| MSTRG. 12034. 4  | 407  | 0. 45929 | 9. 485656738 | 1  |
| MSTRG. 12035. 1  | 1088 | 0. 46986 | 6. 245910645 | 1  |
| MSTRG. 12039. 1  | 58   | 0. 38367 | 7. 813781738 | 1  |
| MSTRG. 12040. 1  | 149  | 0. 3024  | 10. 40228271 | 1  |
| MSTRG. 12041. 3  | 842  | 0. 47167 | 6. 54119873  | 1  |
| MSTRG. 12042. 1  | 208  | 0. 28964 | 9. 778625488 | 1  |
| MSTRG. 12043. 1  | 95   | 0. 27763 | 8. 588195801 | 1  |
| MSTRG. 12044. 1  | 107  | 0. 3024  | 10. 12982178 | 1  |
| MSTRG. 12045. 3  | 387  | 0. 35587 | 9. 975402832 | 1  |
| MSTRG. 12045. 4  | 1432 | 0. 37368 | 5. 895690918 | 1  |
| MSTRG. 12047. 3  | 349  | 0. 35778 | 9. 922424316 | -1 |
| MSTRG. 12053. 2  | 137  | 0. 35373 | 4. 689880371 | 1  |
| MSTRG. 12053. 3  | 192  | 0. 2984  | 10. 47845459 | 1  |
| MSTRG. 12054. 1  | 122  | 0. 29999 | 8. 884094238 | 1  |
| MSTRG. 12057. 4  | 118  | 0. 46076 | 8. 881408691 | 1  |
| MSTRG. 12055. 5  | 99   | 0. 28186 | 9. 686828613 | 1  |
| MSTRG. 12055. 6  | 148  | 0. 28338 | 8. 604431152 | 1  |
| MSTRG. 12055. 7  | 43   | 0. 33911 | 7. 836120605 | 1  |
| MSTRG. 12055. 8  | 135  | 0. 29772 | 10. 23406982 | 1  |
| MSTRG. 12055. 9  | 96   | 0. 28027 | 8. 851379395 | 1  |
| MSTRG. 12055. 10 | 71   | 0. 28683 | 6. 141174316 | 1  |
| MSTRG. 12055. 11 | 148  | 0. 28948 | 8. 604431152 | 1  |
| MSTRG. 12055. 12 | 86   | 0. 37442 | 9. 805358887 | 1  |
| MSTRG. 12055. 13 | 111  | 0. 29187 | 7. 741394043 | 1  |
| MSTRG. 12055. 14 | 101  | 0. 28923 | 7. 651672363 | 1  |
| MSTRG. 12059. 1  | 84   | 0. 32278 | 10. 01678467 | 1  |
| MSTRG. 12049. 1  | 85   | 0. 38173 | 8. 822692871 | 1  |
| MSTRG. 12050. 1  | 65   | 0. 35741 | 6. 54107666  | 1  |
| MSTRG. 12051. 1  | 50   | 0. 36469 | 11. 84039307 | 1  |
| MSTRG. 12069. 1  | 64   | 0. 31714 | 9. 684265137 | 1  |
| MSTRG. 12069. 2  | 391  | 0. 29404 | 5. 575378418 | 1  |
| MSTRG. 12069. 5  | 183  | 0. 32127 | 4. 711608887 | 1  |
| MSTRG. 12070. 1  | 147  | 0. 27911 | 9. 543884277 | 1  |
| MSTRG. 12069. 7  | 132  | 0. 33194 | 8. 491760254 | 1  |
| MSTRG. 12072. 3  | 590  | 0. 40857 | 6. 394348145 | 1  |
| MSTRG. 12072. 10 | 590  | 0. 42417 | 6. 394348145 | 1  |
| MSTRG. 12072. 9  | 590  | 0. 40854 | 6. 394348145 | 1  |
| MSTRG. 12072. 12 | 695  | 0. 2948  | 6. 964782715 | 1  |
| MSTRG. 12080. 1  | 761  | 0. 41938 | 9. 11138916  | 1  |
| MSTRG. 12079. 1  | 48   | 0. 42795 | 10. 61212158 | 1  |
| MSTRG. 12088. 1  | 92   | 0. 35228 | 10. 76287842 | 1  |
| MSTRG. 12093. 2  | 612  | 0. 35881 | 4. 799865723 | 1  |
| MSTRG. 12095. 3  | 454  | 0. 3955  | 6. 107727051 | 1  |
| MSTRG. 12098. 1  | 129  | 0. 30989 | 4. 815368652 | 1  |
| MSTRG. 12099. 2  | 262  | 0. 34695 | 9. 773620605 | 1  |
| MSTRG. 12096. 1  | 20   | 0. 316   | 7. 977966309 | 1  |
| MSTRG. 12100. 1  | 375  | 0. 32386 | 9. 263122559 | 1  |
| MSTRG. 12100. 2  | 852  | 0. 41596 | 8. 684631348 | 1  |
| MSTRG. 12100. 3  | 689  | 0. 33828 | 6. 622619629 | 1  |
| MSTRG. 12102. 1  | 45   | 0. 35516 | 11. 55670166 | 1  |
| MSTRG. 12108. 4  | 2313 | 0. 44824 | 5. 452209473 | 1  |
| MSTRG. 12108. 1  | 2334 | 0. 46045 | 5. 483825684 | 1  |

|                 |      |         |             |    |
|-----------------|------|---------|-------------|----|
| MSTRG. 12108.9  | 2032 | 0.47431 | 5.248962402 | 1  |
| MSTRG. 12108.8  | 2313 | 0.47431 | 5.452209473 | 1  |
| MSTRG. 12108.12 | 178  | 0.40218 | 5.311584473 | -1 |
| MSTRG. 12104.3  | 731  | 0.45286 | 5.487365723 | 1  |
| MSTRG. 12121.2  | 242  | 0.46947 | 9.79473877  | 1  |
| MSTRG. 12121.5  | 296  | 0.45646 | 9.369934082 | -1 |
| MSTRG. 12123.5  | 412  | 0.45158 | 5.634094238 | 1  |
| MSTRG. 12123.2  | 412  | 0.41749 | 5.634094238 | 1  |
| MSTRG. 12123.4  | 412  | 0.42866 | 5.634094238 | 1  |
| MSTRG. 12123.1  | 412  | 0.37595 | 5.634094238 | 1  |
| MSTRG. 12123.3  | 412  | 0.41326 | 5.634094238 | 1  |
| MSTRG. 12123.6  | 14   | 0.32933 | 5.895690918 | 1  |
| MSTRG. 12124.1  | 99   | 0.42803 | 7.641296387 | 1  |
| MSTRG. 12124.2  | 178  | 0.39329 | 11.69940186 | 1  |
| MSTRG. 12125.1  | 131  | 0.42078 | 4.683288574 | -1 |
| MSTRG. 12114.2  | 141  | 0.37831 | 9.038879395 | 1  |
| MSTRG. 12130.3  | 290  | 0.43286 | 6.508972168 | 1  |
| MSTRG. 12131.1  | 50   | 0.41243 | 9.815856934 | 1  |
| MSTRG. 12138.1  | 123  | 0.33121 | 10.20977783 | 1  |
| MSTRG. 12145.1  | 104  | 0.37388 | 10.78631592 | 1  |
| MSTRG. 12146.1  | 88   | 0.41415 | 9.550231934 | 1  |
| MSTRG. 12147.1  | 132  | 0.45507 | 9.264099121 | -1 |
| MSTRG. 12152.1  | 50   | 0.31463 | 4.748718262 | 1  |
| MSTRG. 12153.2  | 108  | 0.34631 | 5.470031738 | 1  |
| MSTRG. 12157.3  | 80   | 0.29328 | 9.503967285 | 1  |
| MSTRG. 12157.4  | 80   | 0.34109 | 9.503967285 | 1  |
| MSTRG. 12157.2  | 158  | 0.34825 | 6.711730957 | 1  |
| MSTRG. 12157.5  | 120  | 0.39981 | 5.168273926 | 1  |
| MSTRG. 12159.2  | 95   | 0.3263  | 10.53863525 | 1  |
| MSTRG. 12159.1  | 50   | 0.43328 | 10.16790771 | 1  |
| MSTRG. 12159.3  | 61   | 0.38262 | 8.789611816 | -1 |
| MSTRG. 12160.1  | 197  | 0.28186 | 9.420227051 | 1  |
| MSTRG. 12161.1  | 84   | 0.36594 | 7.695129395 | 1  |
| MSTRG. 12168.3  | 128  | 0.34122 | 6.88067627  | 1  |
| MSTRG. 12188.1  | 90   | 0.33248 | 9.787658691 | 1  |
| MSTRG. 12189.1  | 173  | 0.37955 | 9.181091309 | 1  |
| MSTRG. 12189.3  | 173  | 0.36617 | 9.181091309 | 1  |
| MSTRG. 12195.1  | 105  | 0.30303 | 7.580993652 | 1  |
| MSTRG. 12196.1  | 68   | 0.30101 | 9.838439941 | 1  |
| MSTRG. 12197.2  | 64   | 0.33931 | 4.528259277 | 1  |
| MSTRG. 12197.3  | 754  | 0.44796 | 6.308044434 | 1  |
| MSTRG. 12197.4  | 1191 | 0.47272 | 8.43560791  | 1  |
| MSTRG. 12197.5  | 212  | 0.31041 | 10.1963501  | 1  |
| MSTRG. 12198.1  | 149  | 0.38651 | 9.805480957 | 1  |
| MSTRG. 12202.1  | 30   | 0.41908 | 8.34197998  | -1 |
| MSTRG. 12233.1  | 45   | 0.35933 | 8.211120605 | 1  |
| MSTRG. 12238.1  | 88   | 0.28642 | 5.107849121 | 1  |
| MSTRG. 12246.2  | 184  | 0.33828 | 7.688781738 | 1  |
| MSTRG. 12208.1  | 20   | 0.36121 | 7.888244629 | 1  |
| MSTRG. 12214.5  | 151  | 0.28982 | 10.83953857 | 1  |
| MSTRG. 12214.6  | 62   | 0.38454 | 7.782775879 | 1  |
| MSTRG. 12214.8  | 123  | 0.32032 | 5.574645996 | 1  |
| MSTRG. 12215.1  | 82   | 0.37253 | 11.1461792  | 1  |
| MSTRG. 12207.1  | 83   | 0.34852 | 4.307678223 | 1  |



|                 |      |          |              |    |
|-----------------|------|----------|--------------|----|
| MSTRG. 12218. 5 | 221  | 0. 44418 | 6. 530090332 | 1  |
| MSTRG. 12218. 6 | 221  | 0. 44046 | 6. 530090332 | 1  |
| MSTRG. 12224. 1 | 27   | 0. 39275 | 9. 809387207 | 1  |
| MSTRG. 12228. 1 | 287  | 0. 39007 | 10. 09527588 | -1 |
| MSTRG. 12274. 1 | 18   | 0. 41115 | 6. 491638184 | 1  |
| MSTRG. 12277. 1 | 144  | 0. 29607 | 9. 60736084  | 1  |
| MSTRG. 12278. 2 | 76   | 0. 37167 | 10. 80596924 | -1 |
| MSTRG. 12279. 1 | 362  | 0. 38328 | 7. 258239746 | 1  |
| MSTRG. 12280. 1 | 251  | 0. 33386 | 6. 452087402 | 1  |
| MSTRG. 12280. 2 | 111  | 0. 26913 | 5. 658752441 | 1  |
| MSTRG. 12280. 3 | 93   | 0. 29783 | 5. 086242676 | 1  |
| MSTRG. 12281. 1 | 205  | 0. 40601 | 8. 090148926 | 1  |
| MSTRG. 12281. 2 | 114  | 0. 28855 | 8. 76776123  | 1  |
| MSTRG. 12285. 2 | 351  | 0. 40978 | 6. 75958252  | 1  |
| MSTRG. 12288. 2 | 462  | 0. 43393 | 9. 103210449 | 1  |
| MSTRG. 12288. 3 | 462  | 0. 45559 | 9. 103210449 | 1  |
| MSTRG. 12302. 2 | 361  | 0. 47651 | 8. 701599121 | 1  |
| MSTRG. 12303. 1 | 56   | 0. 37267 | 11. 71173096 | 1  |
| MSTRG. 12302. 3 | 361  | 0. 38034 | 8. 701599121 | 1  |
| MSTRG. 12302. 4 | 272  | 0. 41292 | 8. 808166504 | 1  |
| MSTRG. 12302. 5 | 361  | 0. 43051 | 8. 701599121 | 1  |
| MSTRG. 12320. 2 | 1133 | 0. 44772 | 6. 297302246 | 1  |
| MSTRG. 12320. 4 | 963  | 0. 4575  | 5. 97869873  | 1  |
| MSTRG. 12320. 5 | 1032 | 0. 40315 | 6. 658630371 | 1  |
| MSTRG. 12320. 7 | 1037 | 0. 44772 | 6. 561218262 | 1  |
| MSTRG. 12322. 1 | 1254 | 0. 3996  | 8. 763122559 | 1  |
| MSTRG. 12323. 1 | 167  | 0. 39741 | 11. 23468018 | -1 |
| MSTRG. 12322. 3 | 129  | 0. 38433 | 9. 694885254 | 1  |
| MSTRG. 12347. 5 | 1821 | 0. 44153 | 9. 077209473 | 1  |
| MSTRG. 12347. 6 | 1266 | 0. 37955 | 9. 068786621 | 1  |
| MSTRG. 12347. 7 | 797  | 0. 30413 | 9. 171203613 | 1  |
| MSTRG. 12347. 8 | 863  | 0. 40502 | 9. 327575684 | 1  |
| MSTRG. 12351. 1 | 53   | 0. 30268 | 10. 01629639 | 1  |
| MSTRG. 12352. 1 | 65   | 0. 32461 | 5. 784851074 | 1  |
| MSTRG. 12340. 2 | 684  | 0. 46367 | 9. 319274902 | 1  |
| MSTRG. 12340. 4 | 684  | 0. 46039 | 9. 319274902 | 1  |
| MSTRG. 12340. 3 | 367  | 0. 44354 | 5. 805236816 | 1  |
| MSTRG. 12341. 1 | 156  | 0. 30436 | 6. 727233887 | 1  |
| MSTRG. 12342. 1 | 104  | 0. 36118 | 9. 892028809 | 1  |
| MSTRG. 12353. 1 | 100  | 0. 43812 | 10. 17266846 | -1 |
| MSTRG. 12356. 1 | 23   | 0. 37895 | 4. 225524902 | 1  |
| MSTRG. 12355. 2 | 392  | 0. 38544 | 5. 860778809 | 1  |
| MSTRG. 12360. 3 | 434  | 0. 35432 | 5. 084411621 | 1  |
| MSTRG. 12359. 1 | 40   | 0. 30796 | 10. 44647217 | -1 |
| MSTRG. 12416. 1 | 72   | 0. 27772 | 4. 689147949 | 1  |
| MSTRG. 12425. 1 | 171  | 0. 39086 | 7. 675109863 | 1  |
| MSTRG. 12426. 2 | 165  | 0. 28683 | 9. 74432373  | 1  |
| MSTRG. 12433. 1 | 107  | 0. 28774 | 8. 822692871 | 1  |
| MSTRG. 12434. 4 | 2320 | 0. 45866 | 5. 667541504 | 1  |
| MSTRG. 12434. 5 | 2337 | 0. 44047 | 5. 651184082 | 1  |
| MSTRG. 12434. 7 | 2354 | 0. 45866 | 5. 612365723 | 1  |
| MSTRG. 12434. 8 | 2141 | 0. 48346 | 5. 569641113 | 1  |
| MSTRG. 12435. 2 | 542  | 0. 47698 | 5. 86114502  | 1  |
| MSTRG. 12439. 2 | 496  | 0. 45304 | 5. 508850098 | 1  |

|                 |      |          |              |    |
|-----------------|------|----------|--------------|----|
| MSTRG. 12440. 1 | 125  | 0. 28982 | 8. 783630371 | 1  |
| MSTRG. 12441. 1 | 171  | 0. 30807 | 9. 847229004 | 1  |
| MSTRG. 12442. 1 | 82   | 0. 30275 | 8. 293395996 | 1  |
| MSTRG. 12442. 2 | 138  | 0. 26845 | 10. 50933838 | 1  |
| MSTRG. 12441. 2 | 132  | 0. 33562 | 8. 677429199 | 1  |
| MSTRG. 12439. 3 | 141  | 0. 2917  | 7. 708190918 | 1  |
| MSTRG. 12439. 4 | 141  | 0. 33798 | 7. 708190918 | 1  |
| MSTRG. 12384. 2 | 870  | 0. 45919 | 4. 867004395 | 1  |
| MSTRG. 12384. 1 | 814  | 0. 47358 | 5. 130432129 | 1  |
| MSTRG. 12384. 3 | 327  | 0. 432   | 5. 577453613 | 1  |
| MSTRG. 12389. 1 | 116  | 0. 41811 | 10. 02850342 | 1  |
| MSTRG. 12390. 3 | 347  | 0. 45872 | 5. 167663574 | 1  |
| MSTRG. 12391. 1 | 157  | 0. 31849 | 8. 743835449 | 1  |
| MSTRG. 12391. 2 | 116  | 0. 35371 | 5. 555725098 | -1 |
| MSTRG. 12392. 1 | 80   | 0. 32144 | 4. 787658691 | -1 |
| MSTRG. 12395. 1 | 87   | 0. 34618 | 10. 73699951 | 1  |
| MSTRG. 12407. 1 | 232  | 0. 41461 | 9. 173156738 | 1  |
| MSTRG. 12400. 2 | 260  | 0. 46145 | 8. 349182129 | 1  |
| MSTRG. 12447. 5 | 928  | 0. 47437 | 5. 316345215 | 1  |
| MSTRG. 12448. 1 | 145  | 0. 31831 | 10. 71954346 | 1  |
| MSTRG. 12449. 1 | 69   | 0. 32421 | 7. 708557129 | 1  |
| MSTRG. 12450. 1 | 99   | 0. 28478 | 9. 640930176 | 1  |
| MSTRG. 12444. 1 | 170  | 0. 35165 | 10. 66937256 | 1  |
| MSTRG. 12445. 2 | 99   | 0. 41215 | 4. 240783691 | 1  |
| MSTRG. 12474. 3 | 57   | 0. 29583 | 6. 109558105 | 1  |
| MSTRG. 12474. 5 | 93   | 0. 42792 | 4. 561706543 | 1  |
| MSTRG. 12474. 2 | 79   | 0. 38804 | 4. 945373535 | 1  |
| MSTRG. 12474. 4 | 110  | 0. 3538  | 9. 658996582 | 1  |
| MSTRG. 12474. 1 | 79   | 0. 38432 | 4. 945373535 | 1  |
| MSTRG. 12474. 7 | 93   | 0. 42889 | 4. 561706543 | 1  |
| MSTRG. 12474. 6 | 57   | 0. 29583 | 6. 109558105 | 1  |
| MSTRG. 12474. 9 | 93   | 0. 42386 | 4. 561706543 | 1  |
| MSTRG. 12474. 8 | 79   | 0. 40401 | 4. 945373535 | 1  |
| MSTRG. 12475. 1 | 476  | 0. 34668 | 6. 021911621 | 1  |
| MSTRG. 12475. 2 | 398  | 0. 34028 | 5. 228088379 | 1  |
| MSTRG. 12475. 3 | 446  | 0. 35073 | 5. 460388184 | 1  |
| MSTRG. 12475. 5 | 443  | 0. 30647 | 5. 460388184 | 1  |
| MSTRG. 12476. 1 | 439  | 0. 47006 | 4. 722595215 | 1  |
| MSTRG. 12476. 2 | 439  | 0. 46286 | 4. 692443848 | 1  |
| MSTRG. 12476. 3 | 459  | 0. 4631  | 4. 593566895 | 1  |
| MSTRG. 12476. 7 | 375  | 0. 45965 | 5. 02166748  | 1  |
| MSTRG. 12476. 8 | 459  | 0. 49167 | 4. 593566895 | 1  |
| MSTRG. 12476. 6 | 432  | 0. 47701 | 5. 159851074 | 1  |
| MSTRG. 12476. 9 | 503  | 0. 49279 | 4. 660095215 | 1  |
| MSTRG. 12494. 1 | 78   | 0. 30387 | 7. 767150879 | 1  |
| MSTRG. 12495. 1 | 74   | 0. 33206 | 9. 890686035 | 1  |
| MSTRG. 12495. 2 | 112  | 0. 33235 | 9. 098205566 | -1 |
| MSTRG. 12504. 1 | 64   | 0. 471   | 9. 919616699 | 1  |
| MSTRG. 12504. 2 | 122  | 0. 30828 | 9. 300476074 | 1  |
| MSTRG. 12505. 1 | 140  | 0. 28982 | 9. 607971191 | 1  |
| MSTRG. 12506. 1 | 125  | 0. 31484 | 11. 00006104 | 1  |
| MSTRG. 12507. 1 | 33   | 0. 40549 | 7. 710266113 | 1  |
| MSTRG. 12505. 2 | 139  | 0. 29367 | 10. 43719482 | 1  |
| MSTRG. 12501. 1 | 1116 | 0. 47431 | 5. 735046387 | 1  |

|                |      |         |             |    |
|----------------|------|---------|-------------|----|
| MSTRG. 12501.3 | 141  | 0.43884 | 9.097595215 | 1  |
| MSTRG. 12509.1 | 119  | 0.3331  | 9.614440918 | 1  |
| MSTRG. 12510.2 | 676  | 0.43636 | 6.746520996 | 1  |
| MSTRG. 12510.3 | 703  | 0.28576 | 6.151916504 | 1  |
| MSTRG. 12510.4 | 573  | 0.43064 | 7.562194824 | 1  |
| MSTRG. 12517.3 | 407  | 0.49463 | 5.796203613 | 1  |
| MSTRG. 12521.1 | 37   | 0.41161 | 5.957702637 | 1  |
| MSTRG. 12525.2 | 827  | 0.41466 | 7.145812988 | 1  |
| MSTRG. 12525.1 | 853  | 0.4215  | 6.74822998  | 1  |
| MSTRG. 12525.3 | 827  | 0.3825  | 7.145812988 | 1  |
| MSTRG. 12528.3 | 229  | 0.48244 | 5.030578613 | 1  |
| MSTRG. 12537.2 | 432  | 0.38038 | 5.163757324 | 1  |
| MSTRG. 12553.1 | 169  | 0.31638 | 9.483581543 | -1 |
| MSTRG. 12558.1 | 41   | 0.3413  | 5.366882324 | 1  |
| MSTRG. 12558.2 | 22   | 0.43501 | 10.4463501  | 1  |
| MSTRG. 12558.3 | 96   | 0.28923 | 10.01641846 | 1  |
| MSTRG. 12560.1 | 110  | 0.29202 | 8.625183105 | 1  |
| MSTRG. 12550.2 | 458  | 0.45708 | 5.481750488 | 1  |
| MSTRG. 12550.3 | 458  | 0.47344 | 5.481750488 | 1  |
| MSTRG. 12569.1 | 62   | 0.38934 | 4.512512207 | 1  |
| MSTRG. 12572.1 | 45   | 0.45357 | 5.304016113 | 1  |
| MSTRG. 12573.1 | 71   | 0.41503 | 10.62042236 | -1 |
| MSTRG. 12576.3 | 80   | 0.36199 | 9.643371582 | 1  |
| MSTRG. 12576.4 | 80   | 0.35026 | 9.643371582 | 1  |
| MSTRG. 12577.7 | 217  | 0.37002 | 7.082092285 | 1  |
| MSTRG. 12577.5 | 214  | 0.39792 | 5.004211426 | 1  |
| MSTRG. 12577.4 | 217  | 0.38211 | 7.082092285 | 1  |
| MSTRG. 12578.4 | 304  | 0.39794 | 6.398620605 | 1  |
| MSTRG. 12588.1 | 3127 | 0.46946 | 8.743835449 | 1  |
| MSTRG. 12588.2 | 3049 | 0.47151 | 8.747375488 | 1  |
| MSTRG. 12588.3 | 3127 | 0.46946 | 8.743835449 | 1  |
| MSTRG. 12588.5 | 3055 | 0.45686 | 8.747375488 | 1  |
| MSTRG. 12589.1 | 57   | 0.41581 | 6.999328613 | 1  |
| MSTRG. 12589.2 | 83   | 0.30963 | 6.225158691 | 1  |
| MSTRG. 12589.3 | 116  | 0.32037 | 8.77130127  | 1  |
| MSTRG. 12589.4 | 103  | 0.36707 | 9.23614502  | 1  |
| MSTRG. 12591.1 | 181  | 0.28592 | 9.829284668 | 1  |
| MSTRG. 12595.2 | 160  | 0.41738 | 4.508361816 | -1 |
| MSTRG. 12596.3 | 265  | 0.37229 | 7.553527832 | 1  |
| MSTRG. 12596.4 | 89   | 0.28982 | 9.29083252  | 1  |
| MSTRG. 12596.5 | 70   | 0.33842 | 7.790588379 | 1  |
| MSTRG. 12599.1 | 110  | 0.27838 | 5.668151855 | 1  |
| MSTRG. 12598.4 | 440  | 0.32642 | 8.791442871 | 1  |
| MSTRG. 12600.1 | 231  | 0.28848 | 9.399597168 | 1  |
| MSTRG. 12598.5 | 440  | 0.3556  | 8.791442871 | 1  |
| MSTRG. 12598.6 | 65   | 0.28662 | 9.150695801 | 1  |
| MSTRG. 12598.8 | 380  | 0.3477  | 7.249206543 | 1  |
| MSTRG. 12598.9 | 380  | 0.38674 | 7.249206543 | 1  |
| MSTRG. 12601.1 | 43   | 0.3819  | 9.354797363 | 1  |
| MSTRG. 12602.1 | 95   | 0.32851 | 9.938293457 | 1  |
| MSTRG. 12602.3 | 50   | 0.32201 | 6.04510498  | 1  |
| MSTRG. 12602.2 | 46   | 0.32018 | 8.329284668 | 1  |
| MSTRG. 12602.4 | 46   | 0.28586 | 8.329284668 | 1  |
| MSTRG. 12603.1 | 164  | 0.36589 | 6.573791504 | 1  |

|                 |      |          |              |    |
|-----------------|------|----------|--------------|----|
| MSTRG. 12603. 2 | 218  | 0. 40182 | 5. 550109863 | 1  |
| MSTRG. 12603. 3 | 164  | 0. 37295 | 6. 573791504 | 1  |
| MSTRG. 12603. 4 | 164  | 0. 35203 | 6. 573791504 | 1  |
| MSTRG. 12607. 2 | 570  | 0. 46333 | 5. 877502441 | 1  |
| MSTRG. 12607. 3 | 559  | 0. 43736 | 6. 014221191 | 1  |
| MSTRG. 12611. 5 | 1782 | 0. 45915 | 4. 95489502  | 1  |
| MSTRG. 12611. 3 | 1896 | 0. 46595 | 4. 941467285 | 1  |
| MSTRG. 12611. 7 | 1896 | 0. 46595 | 4. 941467285 | 1  |
| MSTRG. 12612. 1 | 54   | 0. 40466 | 5. 658996582 | 1  |
| MSTRG. 12612. 2 | 82   | 0. 3492  | 5. 006164551 | 1  |
| MSTRG. 12617. 2 | 423  | 0. 46454 | 6. 902404785 | 1  |
| MSTRG. 12617. 3 | 208  | 0. 33565 | 6. 292419434 | 1  |
| MSTRG. 12619. 1 | 49   | 0. 29928 | 9. 489196777 | 1  |
| MSTRG. 12618. 2 | 132  | 0. 33664 | 6. 49407959  | 1  |
| MSTRG. 12618. 3 | 135  | 0. 29507 | 10. 78704834 | 1  |
| MSTRG. 12619. 2 | 49   | 0. 30641 | 9. 489196777 | 1  |
| MSTRG. 12619. 3 | 49   | 0. 30641 | 9. 489196777 | 1  |
| MSTRG. 12642. 1 | 129  | 0. 33481 | 9. 59197998  | 1  |
| MSTRG. 12643. 1 | 122  | 0. 35371 | 9. 839660645 | 1  |
| MSTRG. 12646. 3 | 74   | 0. 33695 | 7. 981994629 | 1  |
| MSTRG. 12647. 1 | 164  | 0. 28298 | 8. 650695801 | 1  |
| MSTRG. 12642. 2 | 96   | 0. 33358 | 7. 645324707 | 1  |
| MSTRG. 12648. 1 | 62   | 0. 28083 | 6. 490905762 | 1  |
| MSTRG. 12646. 5 | 492  | 0. 47681 | 5. 717346191 | 1  |
| MSTRG. 12646. 4 | 492  | 0. 46428 | 5. 717346191 | 1  |
| MSTRG. 12646. 6 | 225  | 0. 47226 | 6. 28302002  | 1  |
| MSTRG. 12652. 3 | 404  | 0. 4556  | 8. 332092285 | -1 |
| MSTRG. 12652. 4 | 66   | 0. 33643 | 9. 587463379 | 1  |
| MSTRG. 12623. 3 | 453  | 0. 3088  | 5. 16973877  | 1  |
| MSTRG. 12623. 4 | 453  | 0. 30453 | 5. 16973877  | 1  |
| MSTRG. 12623. 6 | 453  | 0. 3034  | 5. 16973877  | 1  |
| MSTRG. 12623. 5 | 453  | 0. 40262 | 5. 16973877  | 1  |
| MSTRG. 12625. 2 | 270  | 0. 41331 | 9. 025939941 | 1  |
| MSTRG. 12625. 3 | 254  | 0. 4287  | 8. 839904785 | 1  |
| MSTRG. 12627. 1 | 257  | 0. 41079 | 6. 239318848 | 1  |
| MSTRG. 12627. 2 | 303  | 0. 43316 | 7. 710266113 | 1  |
| MSTRG. 12633. 2 | 334  | 0. 37937 | 7. 016540527 | 1  |
| MSTRG. 12635. 1 | 760  | 0. 44793 | 5. 20892334  | 1  |
| MSTRG. 12655. 1 | 91   | 0. 43989 | 9. 16583252  | 1  |
| MSTRG. 12660. 1 | 107  | 0. 44654 | 10. 0055542  | 1  |
| MSTRG. 12661. 2 | 264  | 0. 40132 | 9. 791442871 | 1  |
| MSTRG. 12664. 1 | 238  | 0. 31421 | 9. 336853027 | 1  |
| MSTRG. 12674. 3 | 172  | 0. 44929 | 7. 768005371 | 1  |
| MSTRG. 12676. 1 | 2028 | 0. 43557 | 5. 426818848 | 1  |
| MSTRG. 12677. 2 | 225  | 0. 34956 | 9. 510803223 | 1  |
| MSTRG. 12680. 1 | 74   | 0. 33717 | 9. 510314941 | -1 |
| MSTRG. 12681. 2 | 644  | 0. 44363 | 5. 71673584  | 1  |
| MSTRG. 12682. 1 | 291  | 0. 38395 | 6. 500061035 | 1  |
| MSTRG. 12685. 1 | 247  | 0. 29772 | 8. 936828613 | 1  |
| MSTRG. 12685. 2 | 255  | 0. 29607 | 9. 11541748  | 1  |
| MSTRG. 12686. 1 | 31   | 0. 35371 | 4. 035705566 | 1  |
| MSTRG. 12683. 2 | 543  | 0. 43739 | 6. 160583496 | 1  |
| MSTRG. 12709. 4 | 182  | 0. 37028 | 9. 684631348 | 1  |
| MSTRG. 12711. 1 | 110  | 0. 29595 | 10. 57415771 | 1  |

|                |      |         |             |    |
|----------------|------|---------|-------------|----|
| MSTRG. 12711.2 | 164  | 0.2921  | 9.236999512 | 1  |
| MSTRG. 12711.3 | 207  | 0.29615 | 9.831237793 | 1  |
| MSTRG. 12709.6 | 175  | 0.32237 | 9.207824707 | 1  |
| MSTRG. 12713.1 | 64   | 0.28982 | 8.535827637 | 1  |
| MSTRG. 12715.1 | 157  | 0.32413 | 5.961608887 | 1  |
| MSTRG. 12701.1 | 55   | 0.46026 | 10.25604248 | -1 |
| MSTRG. 12716.1 | 844  | 0.43248 | 6.252990723 | 1  |
| MSTRG. 12716.2 | 523  | 0.32386 | 7.16204834  | 1  |
| MSTRG. 12716.3 | 618  | 0.3799  | 6.548156738 | 1  |
| MSTRG. 12717.1 | 69   | 0.31061 | 6.227722168 | 1  |
| MSTRG. 12716.4 | 130  | 0.31653 | 6.870300293 | 1  |
| MSTRG. 12718.1 | 79   | 0.32697 | 9.590026855 | 1  |
| MSTRG. 12716.5 | 42   | 0.35814 | 7.996887207 | -1 |
| MSTRG. 12705.2 | 4    | 0.29593 | 5.274963379 | 1  |
| MSTRG. 12705.4 | 84   | 0.37152 | 6.571594238 | 1  |
| MSTRG. 12705.3 | 1217 | 0.48589 | 6.53717041  | 1  |
| MSTRG. 12705.5 | 813  | 0.48098 | 6.274841309 | 1  |
| MSTRG. 12730.2 | 66   | 0.2944  | 9.801330566 | 1  |
| MSTRG. 12731.3 | 101  | 0.3608  | 4.444519043 | 1  |
| MSTRG. 12731.2 | 814  | 0.40525 | 10.13067627 | 1  |
| MSTRG. 12731.4 | 101  | 0.29374 | 4.444519043 | 1  |
| MSTRG. 12731.6 | 441  | 0.40237 | 11.21905518 | 1  |
| MSTRG. 12731.7 | 441  | 0.35592 | 11.21905518 | 1  |
| MSTRG. 12731.8 | 407  | 0.38309 | 4.796569824 | 1  |
| MSTRG. 12720.2 | 147  | 0.38089 | 6.96697998  | 1  |
| MSTRG. 12721.3 | 446  | 0.40999 | 5.912902832 | 1  |
| MSTRG. 12722.1 | 37   | 0.40553 | 4.55645752  | -1 |
| MSTRG. 12725.1 | 23   | 0.30756 | 7.978088379 | 1  |
| MSTRG. 12725.2 | 61   | 0.34868 | 7.853942871 | 1  |
| MSTRG. 12738.3 | 284  | 0.37777 | 7.787658691 | 1  |
| MSTRG. 12746.1 | 233  | 0.39437 | 9.441955566 | 1  |
| MSTRG. 12759.1 | 62   | 0.38451 | 10.45001221 | -1 |
| MSTRG. 12768.1 | 45   | 0.36822 | 9.764099121 | 1  |
| MSTRG. 12769.1 | 48   | 0.3694  | 8.015441895 | 1  |
| MSTRG. 12791.1 | 1973 | 0.4591  | 5.979797363 | 1  |
| MSTRG. 12791.2 | 1973 | 0.47755 | 5.979797363 | 1  |
| MSTRG. 12792.1 | 5560 | 0.4738  | 5.404724121 | 1  |
| MSTRG. 12792.2 | 5560 | 0.47542 | 5.404724121 | 1  |
| MSTRG. 12792.3 | 5560 | 0.47135 | 5.404724121 | 1  |
| MSTRG. 12792.6 | 62   | 0.2994  | 6.001647949 | 1  |
| MSTRG. 12793.2 | 72   | 0.31558 | 10.18719482 | 1  |
| MSTRG. 12794.1 | 96   | 0.32947 | 10.30474854 | 1  |
| MSTRG. 12794.2 | 96   | 0.41201 | 10.30474854 | 1  |
| MSTRG. 12777.1 | 452  | 0.39792 | 5.185241699 | 1  |
| MSTRG. 12778.1 | 250  | 0.38264 | 6.068664551 | 1  |
| MSTRG. 12784.1 | 28   | 0.36978 | 7.728210449 | 1  |
| MSTRG. 12785.2 | 142  | 0.3     | 9.848815918 | 1  |
| MSTRG. 12785.3 | 142  | 0.3231  | 9.848815918 | 1  |
| MSTRG. 12785.4 | 142  | 0.33519 | 9.848815918 | 1  |
| MSTRG. 12789.3 | 451  | 0.42948 | 6.496887207 | 1  |
| MSTRG. 12800.1 | 313  | 0.45473 | 4.585876465 | 1  |
| MSTRG. 12800.2 | 317  | 0.43423 | 4.663024902 | 1  |
| MSTRG. 12800.3 | 317  | 0.44632 | 4.585876465 | 1  |
| MSTRG. 12804.2 | 155  | 0.34568 | 8.332702637 | 1  |

|                  |      |          |              |    |
|------------------|------|----------|--------------|----|
| MSTRG. 12805. 3  | 230  | 0. 43941 | 5. 338562012 | -1 |
| MSTRG. 12806. 2  | 552  | 0. 47366 | 8. 473937988 | 1  |
| MSTRG. 12806. 1  | 617  | 0. 47954 | 8. 00592041  | 1  |
| MSTRG. 12806. 4  | 623  | 0. 49159 | 6. 823791504 | 1  |
| MSTRG. 12806. 5  | 552  | 0. 46355 | 8. 473937988 | 1  |
| MSTRG. 12808. 2  | 373  | 0. 48686 | 9. 385803223 | 1  |
| MSTRG. 12810. 1  | 92   | 0. 32257 | 9. 855651855 | 1  |
| MSTRG. 12813. 1  | 144  | 0. 34141 | 6. 30291748  | 1  |
| MSTRG. 12816. 1  | 60   | 0. 33747 | 6. 801696777 | 1  |
| MSTRG. 12829. 1  | 562  | 0. 34212 | 7. 175476074 | 1  |
| MSTRG. 12829. 6  | 562  | 0. 45007 | 7. 175476074 | 1  |
| MSTRG. 12829. 4  | 562  | 0. 45352 | 7. 175476074 | 1  |
| MSTRG. 12829. 7  | 463  | 0. 46767 | 9. 190490723 | 1  |
| MSTRG. 12830. 4  | 893  | 0. 46867 | 5. 83416748  | 1  |
| MSTRG. 12831. 1  | 136  | 0. 36613 | 10. 78045654 | 1  |
| MSTRG. 12835. 1  | 66   | 0. 36918 | 8. 280212402 | -1 |
| MSTRG. 12826. 1  | 66   | 0. 32881 | 6. 532287598 | 1  |
| MSTRG. 12826. 2  | 66   | 0. 34581 | 6. 532287598 | 1  |
| MSTRG. 12827. 1  | 22   | 0. 43501 | 6. 809387207 | -1 |
| MSTRG. 12839. 2  | 322  | 0. 44307 | 7. 679260254 | 1  |
| MSTRG. 12847. 3  | 653  | 0. 48005 | 5. 245666504 | 1  |
| MSTRG. 12847. 4  | 653  | 0. 48005 | 5. 245666504 | 1  |
| MSTRG. 12848. 1  | 65   | 0. 34839 | 6. 216125488 | 1  |
| MSTRG. 12851. 2  | 472  | 0. 42394 | 9. 231628418 | 1  |
| MSTRG. 12851. 3  | 307  | 0. 40367 | 9. 322692871 | 1  |
| MSTRG. 12863. 6  | 923  | 0. 41697 | 5. 15032959  | 1  |
| MSTRG. 12863. 7  | 923  | 0. 41697 | 5. 15032959  | 1  |
| MSTRG. 12863. 14 | 972  | 0. 43219 | 5. 172302246 | 1  |
| MSTRG. 12863. 16 | 973  | 0. 42517 | 5. 172302246 | 1  |
| MSTRG. 12863. 11 | 924  | 0. 43491 | 5. 15032959  | 1  |
| MSTRG. 12863. 13 | 923  | 0. 43815 | 5. 15032959  | 1  |
| MSTRG. 12863. 15 | 693  | 0. 44178 | 6. 048400879 | 1  |
| MSTRG. 12863. 12 | 972  | 0. 45612 | 5. 172302246 | 1  |
| MSTRG. 12863. 18 | 1024 | 0. 46095 | 5. 226989746 | 1  |
| MSTRG. 12863. 17 | 692  | 0. 45064 | 6. 048400879 | 1  |
| MSTRG. 12863. 19 | 165  | 0. 34931 | 8. 744934082 | 1  |
| MSTRG. 12864. 1  | 69   | 0. 26594 | 9. 098327637 | 1  |
| MSTRG. 12863. 20 | 12   | 0. 37671 | 5. 752990723 | 1  |
| MSTRG. 12888. 1  | 95   | 0. 28486 | 6. 684265137 | 1  |
| MSTRG. 12890. 2  | 186  | 0. 33929 | 9. 61114502  | 1  |
| MSTRG. 12890. 4  | 69   | 0. 29595 | 10. 53009033 | 1  |
| MSTRG. 12907. 3  | 682  | 0. 50244 | 6. 122497559 | 1  |
| MSTRG. 12907. 2  | 629  | 0. 41038 | 5. 793640137 | 1  |
| MSTRG. 12907. 4  | 438  | 0. 46639 | 6. 873474121 | 1  |
| MSTRG. 12907. 5  | 91   | 0. 29594 | 6. 487976074 | 1  |
| MSTRG. 12907. 6  | 397  | 0. 3398  | 7. 473937988 | 1  |
| MSTRG. 12912. 3  | 1037 | 0. 47097 | 6. 582580566 | -1 |
| MSTRG. 12912. 4  | 663  | 0. 45272 | 8. 393005371 | -1 |
| MSTRG. 12914. 1  | 32   | 0. 33865 | 9. 579406738 | 1  |
| MSTRG. 12933. 4  | 188  | 0. 36461 | 5. 045349121 | 1  |
| MSTRG. 12933. 6  | 187  | 0. 36201 | 5. 045349121 | 1  |
| MSTRG. 12933. 5  | 189  | 0. 37422 | 5. 129821777 | 1  |
| MSTRG. 12933. 3  | 188  | 0. 33281 | 5. 129821777 | 1  |
| MSTRG. 12933. 7  | 189  | 0. 33281 | 5. 129821777 | 1  |

|                  |      |          |              |    |
|------------------|------|----------|--------------|----|
| MSTRG. 12933. 8  | 725  | 0. 40617 | 9. 588195801 | 1  |
| MSTRG. 12934. 1  | 84   | 0. 3492  | 10. 1774292  | 1  |
| MSTRG. 12919. 1  | 142  | 0. 37391 | 10. 09161377 | 1  |
| MSTRG. 12920. 1  | 502  | 0. 45167 | 4. 719909668 | 1  |
| MSTRG. 12920. 2  | 502  | 0. 42019 | 4. 719909668 | 1  |
| MSTRG. 12925. 1  | 26   | 0. 4138  | 10. 34735107 | 1  |
| MSTRG. 12925. 2  | 33   | 0. 40801 | 8. 044616699 | 1  |
| MSTRG. 12926. 1  | 14   | 0. 41546 | 8. 841491699 | 1  |
| MSTRG. 12938. 1  | 42   | 0. 36094 | 9. 297302246 | 1  |
| MSTRG. 12947. 3  | 1561 | 0. 37871 | 8. 252380371 | 1  |
| MSTRG. 12947. 2  | 1512 | 0. 40008 | 7. 917175293 | 1  |
| MSTRG. 12971. 1  | 847  | 0. 31512 | 9. 462463379 | 1  |
| MSTRG. 12978. 1  | 82   | 0. 37807 | 8. 59173584  | 1  |
| MSTRG. 12978. 2  | 158  | 0. 29367 | 10. 00958252 | 1  |
| MSTRG. 12978. 3  | 158  | 0. 29343 | 10. 00958252 | 1  |
| MSTRG. 12983. 5  | 747  | 0. 44569 | 5. 559387207 | 1  |
| MSTRG. 12984. 1  | 47   | 0. 43185 | 4. 584289551 | 1  |
| MSTRG. 12939. 1  | 546  | 0. 39234 | 8. 889343262 | 1  |
| MSTRG. 12939. 2  | 418  | 0. 37534 | 9. 028869629 | 1  |
| MSTRG. 12939. 3  | 418  | 0. 42599 | 9. 028869629 | 1  |
| MSTRG. 12940. 1  | 74   | 0. 31268 | 7. 814025879 | 1  |
| MSTRG. 12939. 4  | 418  | 0. 43205 | 9. 028869629 | 1  |
| MSTRG. 12939. 5  | 418  | 0. 33211 | 9. 028869629 | 1  |
| MSTRG. 12988. 1  | 98   | 0. 30517 | 9. 842346191 | 1  |
| MSTRG. 13003. 1  | 84   | 0. 31287 | 10. 42242432 | 1  |
| MSTRG. 13008. 1  | 85   | 0. 28891 | 6. 346740723 | 1  |
| MSTRG. 13008. 2  | 99   | 0. 35952 | 9. 85357666  | 1  |
| MSTRG. 13009. 1  | 44   | 0. 35496 | 7. 713684082 | 1  |
| MSTRG. 13010. 1  | 36   | 0. 44866 | 11. 72296143 | -1 |
| MSTRG. 13012. 1  | 67   | 0. 38662 | 9. 359069824 | -1 |
| MSTRG. 13013. 1  | 91   | 0. 36241 | 10. 08929443 | 1  |
| MSTRG. 13013. 2  | 91   | 0. 28982 | 6. 476135254 | 1  |
| MSTRG. 13013. 6  | 69   | 0. 42797 | 10. 04644775 | 1  |
| MSTRG. 13013. 4  | 139  | 0. 33281 | 10. 1206665  | 1  |
| MSTRG. 13013. 5  | 234  | 0. 33698 | 7. 666320801 | 1  |
| MSTRG. 13014. 1  | 100  | 0. 35581 | 9. 834533691 | 1  |
| MSTRG. 13022. 1  | 148  | 0. 29607 | 9. 259460449 | 1  |
| MSTRG. 13022. 2  | 92   | 0. 29202 | 9. 206359863 | 1  |
| MSTRG. 13025. 2  | 135  | 0. 29526 | 9. 988586426 | 1  |
| MSTRG. 13025. 4  | 509  | 0. 29772 | 6. 473693848 | 1  |
| MSTRG. 13025. 5  | 125  | 0. 29367 | 10. 02215576 | 1  |
| MSTRG. 13025. 7  | 163  | 0. 29607 | 9. 734802246 | 1  |
| MSTRG. 13025. 8  | 102  | 0. 29772 | 10. 86627197 | 1  |
| MSTRG. 13025. 9  | 558  | 0. 29367 | 5. 82232666  | 1  |
| MSTRG. 13025. 10 | 81   | 0. 30576 | 9. 097595215 | 1  |
| MSTRG. 13025. 11 | 509  | 0. 29367 | 6. 473693848 | 1  |
| MSTRG. 13025. 12 | 279  | 0. 30297 | 9. 69354248  | 1  |
| MSTRG. 13030. 3  | 1039 | 0. 47357 | 5. 280212402 | 1  |
| MSTRG. 13030. 1  | 3434 | 0. 47422 | 5. 229431152 | 1  |
| MSTRG. 13034. 1  | 9    | 0. 35569 | 5. 840148926 | -1 |
| MSTRG. 13034. 2  | 11   | 0. 39585 | 5. 222595215 | 1  |
| MSTRG. 13034. 3  | 61   | 0. 39118 | 10. 19378662 | 1  |
| MSTRG. 13040. 4  | 1685 | 0. 44343 | 6. 960510254 | 1  |
| MSTRG. 13040. 6  | 1685 | 0. 46155 | 6. 960510254 | 1  |

|                 |      |          |              |    |
|-----------------|------|----------|--------------|----|
| MSTRG. 13039. 1 | 32   | 0. 43585 | 5. 971618652 | -1 |
| MSTRG. 13048. 1 | 1116 | 0. 3439  | 6. 730529785 | 1  |
| MSTRG. 13049. 1 | 97   | 0. 32995 | 10. 66534424 | 1  |
| MSTRG. 13055. 1 | 45   | 0. 31444 | 8. 312561035 | 1  |
| MSTRG. 13053. 1 | 92   | 0. 36221 | 9. 236022949 | 1  |
| MSTRG. 13056. 2 | 410  | 0. 35881 | 8. 780212402 | 1  |
| MSTRG. 13061. 1 | 693  | 0. 42931 | 8. 829528809 | 1  |
| MSTRG. 13061. 3 | 693  | 0. 35756 | 8. 829528809 | 1  |
| MSTRG. 13062. 1 | 125  | 0. 34735 | 8. 070617676 | 1  |
| MSTRG. 13061. 5 | 150  | 0. 31225 | 7. 62322998  | 1  |
| MSTRG. 13060. 1 | 76   | 0. 35372 | 8. 721496582 | 1  |
| MSTRG. 13063. 1 | 66   | 0. 30144 | 6. 229431152 | 1  |
| MSTRG. 13065. 2 | 210  | 0. 45981 | 5. 177185059 | 1  |
| MSTRG. 13066. 3 | 354  | 0. 45062 | 9. 200256348 | 1  |
| MSTRG. 13068. 1 | 21   | 0. 44445 | 5. 949157715 | 1  |
| MSTRG. 13077. 4 | 227  | 0. 45561 | 7. 054504395 | 1  |
| MSTRG. 13078. 1 | 114  | 0. 36408 | 8. 734558105 | 1  |
| MSTRG. 13079. 2 | 363  | 0. 40661 | 7. 037536621 | 1  |
| MSTRG. 13082. 3 | 41   | 0. 45576 | 9. 00982666  | 1  |
| MSTRG. 13082. 4 | 81   | 0. 36072 | 9. 184143066 | 1  |
| MSTRG. 13082. 2 | 210  | 0. 30453 | 8. 602600098 | 1  |
| MSTRG. 13087. 1 | 1740 | 0. 44659 | 4. 300598145 | 1  |
| MSTRG. 13087. 2 | 1740 | 0. 44659 | 4. 300598145 | 1  |
| MSTRG. 13087. 4 | 1657 | 0. 4562  | 4. 320007324 | 1  |
| MSTRG. 13087. 6 | 1631 | 0. 42998 | 4. 323059082 | 1  |
| MSTRG. 13091. 2 | 172  | 0. 30396 | 11. 95062256 | 1  |
| MSTRG. 13096. 2 | 322  | 0. 35788 | 5. 80255127  | 1  |
| MSTRG. 13106. 2 | 8798 | 0. 47931 | 5. 395935059 | 1  |
| MSTRG. 13106. 1 | 8781 | 0. 47931 | 5. 395690918 | 1  |
| MSTRG. 13106. 3 | 8710 | 0. 47931 | 5. 383605957 | 1  |
| MSTRG. 13107. 1 | 38   | 0. 39615 | 9. 692443848 | 1  |
| MSTRG. 13100. 4 | 188  | 0. 44669 | 9. 564025879 | 1  |
| MSTRG. 13110. 4 | 1268 | 0. 43252 | 8. 54498291  | 1  |
| MSTRG. 13110. 3 | 1268 | 0. 46773 | 8. 54498291  | 1  |
| MSTRG. 13110. 5 | 1268 | 0. 43176 | 8. 54498291  | 1  |
| MSTRG. 13110. 6 | 723  | 0. 4714  | 8. 992980957 | 1  |
| MSTRG. 13110. 7 | 1235 | 0. 431   | 7. 381164551 | 1  |
| MSTRG. 13111. 1 | 55   | 0. 38466 | 4. 749694824 | 1  |
| MSTRG. 13112. 1 | 79   | 0. 28826 | 9. 099914551 | 1  |
| MSTRG. 13115. 1 | 1693 | 0. 42084 | 6. 878601074 | 1  |
| MSTRG. 13117. 1 | 49   | 0. 46543 | 8. 938293457 | 1  |
| MSTRG. 13115. 2 | 1693 | 0. 44152 | 6. 878601074 | 1  |
| MSTRG. 13118. 2 | 153  | 0. 41795 | 8. 502868652 | 1  |
| MSTRG. 13119. 1 | 130  | 0. 27794 | 9. 803894043 | 1  |
| MSTRG. 13120. 1 | 72   | 0. 36394 | 7. 705627441 | 1  |
| MSTRG. 13118. 4 | 191  | 0. 32729 | 10. 10150146 | 1  |
| MSTRG. 13118. 5 | 99   | 0. 30092 | 10. 10003662 | 1  |
| MSTRG. 13143. 4 | 1817 | 0. 41709 | 6. 012268066 | 1  |
| MSTRG. 13143. 6 | 786  | 0. 34283 | 8. 840148926 | 1  |
| MSTRG. 13143. 5 | 1854 | 0. 44078 | 6. 079040527 | 1  |
| MSTRG. 13143. 7 | 1825 | 0. 4079  | 5. 94708252  | 1  |
| MSTRG. 13144. 1 | 89   | 0. 29534 | 9. 692565918 | 1  |
| MSTRG. 13143. 8 | 1829 | 0. 39625 | 5. 93145752  | 1  |
| MSTRG. 13143. 9 | 1780 | 0. 44242 | 5. 863586426 | 1  |



|                  |      |          |              |    |
|------------------|------|----------|--------------|----|
| MSTRG. 13145. 1  | 43   | 0. 32241 | 9. 992004395 | 1  |
| MSTRG. 13146. 1  | 175  | 0. 28982 | 9. 111999512 | 1  |
| MSTRG. 13143. 10 | 42   | 0. 35596 | 4. 21282959  | 1  |
| MSTRG. 13148. 1  | 122  | 0. 27653 | 6. 007385254 | 1  |
| MSTRG. 13149. 1  | 67   | 0. 29852 | 9. 36895752  | 1  |
| MSTRG. 13150. 1  | 87   | 0. 32181 | 7. 63861084  | 1  |
| MSTRG. 13151. 1  | 115  | 0. 2921  | 9. 295959473 | 1  |
| MSTRG. 13152. 1  | 89   | 0. 27794 | 7. 683044434 | 1  |
| MSTRG. 13152. 2  | 89   | 0. 28199 | 7. 683044434 | 1  |
| MSTRG. 13143. 11 | 95   | 0. 30191 | 8. 382751465 | 1  |
| MSTRG. 13143. 12 | 874  | 0. 44978 | 5. 266784668 | 1  |
| MSTRG. 13130. 1  | 107  | 0. 37471 | 8. 549987793 | 1  |
| MSTRG. 13134. 1  | 129  | 0. 31697 | 10. 80291748 | 1  |
| MSTRG. 13137. 1  | 219  | 0. 33523 | 11. 90679932 | 1  |
| MSTRG. 13138. 3  | 213  | 0. 32671 | 9. 573303223 | 1  |
| MSTRG. 13138. 5  | 221  | 0. 37837 | 9. 481140137 | 1  |
| MSTRG. 13138. 6  | 154  | 0. 40312 | 9. 169494629 | 1  |
| MSTRG. 13139. 1  | 209  | 0. 28186 | 10. 05645752 | 1  |
| MSTRG. 13139. 2  | 112  | 0. 28779 | 7. 651306152 | 1  |
| MSTRG. 13139. 3  | 138  | 0. 28698 | 10. 34539795 | 1  |
| MSTRG. 13139. 4  | 128  | 0. 29772 | 9. 713806152 | 1  |
| MSTRG. 13139. 5  | 248  | 0. 28186 | 9. 45501709  | 1  |
| MSTRG. 13128. 2  | 270  | 0. 38512 | 6. 206848145 | 1  |
| MSTRG. 13128. 3  | 295  | 0. 4069  | 6. 682434082 | 1  |
| MSTRG. 13128. 4  | 270  | 0. 42634 | 6. 206848145 | 1  |
| MSTRG. 13154. 1  | 58   | 0. 36612 | 5. 992004395 | 1  |
| MSTRG. 13154. 2  | 36   | 0. 34411 | 5. 497741699 | 1  |
| MSTRG. 13154. 3  | 58   | 0. 36252 | 5. 992004395 | 1  |
| MSTRG. 13154. 4  | 58   | 0. 33701 | 5. 992004395 | 1  |
| MSTRG. 13155. 2  | 584  | 0. 43939 | 7. 09197998  | 1  |
| MSTRG. 13162. 1  | 112  | 0. 33046 | 5. 89276123  | 1  |
| MSTRG. 13163. 1  | 175  | 0. 28706 | 8. 931213379 | 1  |
| MSTRG. 13164. 1  | 157  | 0. 29022 | 8. 500061035 | 1  |
| MSTRG. 13161. 6  | 1035 | 0. 4327  | 8. 649108887 | 1  |
| MSTRG. 13161. 4  | 1035 | 0. 4579  | 8. 649108887 | 1  |
| MSTRG. 13161. 7  | 886  | 0. 39988 | 8. 32220459  | 1  |
| MSTRG. 13161. 5  | 1380 | 0. 37392 | 7. 887512207 | 1  |
| MSTRG. 13165. 1  | 57   | 0. 44319 | 11. 30865479 | -1 |
| MSTRG. 13159. 2  | 475  | 0. 43423 | 7. 584899902 | 1  |
| MSTRG. 13159. 3  | 469  | 0. 41656 | 7. 974182129 | 1  |
| MSTRG. 13159. 4  | 474  | 0. 45562 | 8. 233459473 | 1  |
| MSTRG. 13166. 1  | 611  | 0. 43383 | 9. 473449707 | 1  |
| MSTRG. 13170. 3  | 121  | 0. 46124 | 5. 674499512 | 1  |
| MSTRG. 13171. 1  | 176  | 0. 34719 | 7. 808410645 | 1  |
| MSTRG. 13177. 1  | 167  | 0. 34648 | 12. 003479   | 1  |
| MSTRG. 13177. 4  | 93   | 0. 3132  | 7. 660583496 | 1  |
| MSTRG. 13177. 5  | 45   | 0. 33704 | 10. 18243408 | 1  |
| MSTRG. 13174. 1  | 2499 | 0. 44718 | 5. 617126465 | 1  |
| MSTRG. 13181. 3  | 1355 | 0. 45495 | 6. 022277832 | 1  |
| MSTRG. 13181. 4  | 1580 | 0. 47682 | 5. 977355957 | 1  |
| MSTRG. 13181. 5  | 1327 | 0. 46676 | 6. 391296387 | 1  |
| MSTRG. 13179. 1  | 99   | 0. 33117 | 6. 541931152 | 1  |
| MSTRG. 13179. 3  | 62   | 0. 38651 | 8. 161315918 | 1  |
| MSTRG. 13179. 2  | 98   | 0. 40999 | 8. 808532715 | 1  |

|                  |      |          |              |    |
|------------------|------|----------|--------------|----|
| MSTRG. 13180. 1  | 90   | 0. 32634 | 12. 30352783 | 1  |
| MSTRG. 13184. 1  | 460  | 0. 35297 | 7. 127868652 | 1  |
| MSTRG. 13184. 2  | 460  | 0. 41548 | 7. 127868652 | 1  |
| MSTRG. 13199. 1  | 257  | 0. 46592 | 8. 543151855 | 1  |
| MSTRG. 13199. 2  | 269  | 0. 46101 | 9. 096374512 | 1  |
| MSTRG. 13201. 1  | 54   | 0. 44394 | 9. 817443848 | 1  |
| MSTRG. 13183. 1  | 59   | 0. 42585 | 10. 29486084 | 1  |
| MSTRG. 13206. 2  | 0    | 0. 40306 | 0            | -1 |
| MSTRG. 13208. 1  | 319  | 0. 32237 | 6. 93182373  | 1  |
| MSTRG. 13208. 4  | 311  | 0. 32948 | 6. 93182373  | 1  |
| MSTRG. 13209. 1  | 189  | 0. 30576 | 9. 869689941 | 1  |
| MSTRG. 13209. 2  | 331  | 0. 28478 | 9. 277648926 | 1  |
| MSTRG. 13203. 1  | 54   | 0. 37141 | 10. 65106201 | 1  |
| MSTRG. 13217. 1  | 60   | 0. 42514 | 9. 819885254 | 1  |
| MSTRG. 13221. 2  | 328  | 0. 44213 | 8. 424621582 | 1  |
| MSTRG. 13222. 1  | 714  | 0. 40988 | 6. 215270996 | 1  |
| MSTRG. 13222. 2  | 782  | 0. 34583 | 6. 124572754 | 1  |
| MSTRG. 13222. 3  | 757  | 0. 38544 | 6. 096618652 | 1  |
| MSTRG. 13222. 6  | 83   | 0. 33146 | 8. 57611084  | 1  |
| MSTRG. 13223. 1  | 55   | 0. 29615 | 10. 29486084 | 1  |
| MSTRG. 13224. 1  | 113  | 0. 37511 | 7. 682922363 | 1  |
| MSTRG. 13222. 7  | 94   | 0. 33878 | 9. 854187012 | 1  |
| MSTRG. 13233. 1  | 733  | 0. 44704 | 8. 883728027 | 1  |
| MSTRG. 13237. 1  | 161  | 0. 39083 | 10. 21331787 | 1  |
| MSTRG. 13241. 3  | 74   | 0. 34807 | 4. 904724121 | 1  |
| MSTRG. 13241. 4  | 478  | 0. 395   | 4. 746643066 | 1  |
| MSTRG. 13241. 5  | 347  | 0. 39662 | 5. 460144043 | 1  |
| MSTRG. 13241. 6  | 211  | 0. 321   | 4. 405090332 | 1  |
| MSTRG. 13243. 1  | 214  | 0. 44411 | 7. 037902832 | 1  |
| MSTRG. 13243. 2  | 166  | 0. 47427 | 6. 246643066 | 1  |
| MSTRG. 13243. 3  | 185  | 0. 49272 | 7. 113586426 | 1  |
| MSTRG. 13244. 3  | 528  | 0. 43479 | 9. 178039551 | 1  |
| MSTRG. 13261. 4  | 1768 | 0. 49169 | 5. 813049316 | 1  |
| MSTRG. 13261. 5  | 1769 | 0. 49169 | 5. 787902832 | 1  |
| MSTRG. 13261. 6  | 1768 | 0. 49169 | 5. 764465332 | 1  |
| MSTRG. 13261. 7  | 1770 | 0. 49169 | 5. 764465332 | 1  |
| MSTRG. 13261. 1  | 1771 | 0. 45938 | 5. 789001465 | 1  |
| MSTRG. 13261. 8  | 1563 | 0. 45773 | 5. 704162598 | 1  |
| MSTRG. 13261. 9  | 1570 | 0. 45521 | 5. 63092041  | 1  |
| MSTRG. 13261. 10 | 1468 | 0. 43242 | 5. 611633301 | 1  |
| MSTRG. 13261. 11 | 1468 | 0. 45521 | 5. 611633301 | 1  |
| MSTRG. 13261. 12 | 1470 | 0. 45521 | 5. 611633301 | 1  |
| MSTRG. 13261. 13 | 1475 | 0. 44577 | 5. 542053223 | 1  |
| MSTRG. 13261. 14 | 1475 | 0. 43866 | 5. 542053223 | 1  |
| MSTRG. 13263. 1  | 125  | 0. 35869 | 9. 028503418 | 1  |
| MSTRG. 13266. 1  | 104  | 0. 31209 | 10. 36883545 | 1  |
| MSTRG. 13267. 1  | 181  | 0. 28061 | 6. 881774902 | 1  |
| MSTRG. 13267. 2  | 127  | 0. 37575 | 11. 0322876  | 1  |
| MSTRG. 13267. 3  | 101  | 0. 34109 | 11. 70648193 | 1  |
| MSTRG. 13267. 4  | 101  | 0. 36035 | 11. 70648193 | 1  |
| MSTRG. 13254. 2  | 66   | 0. 27732 | 10. 2366333  | 1  |
| MSTRG. 13254. 1  | 13   | 0. 34347 | 5. 222351074 | 1  |
| MSTRG. 13253. 3  | 295  | 0. 37867 | 9. 096130371 | 1  |
| MSTRG. 13253. 4  | 303  | 0. 33853 | 8. 862487793 | 1  |

|                  |     |          |              |    |
|------------------|-----|----------|--------------|----|
| MSTRG. 13259. 2  | 922 | 0. 40939 | 4. 532409668 | 1  |
| MSTRG. 13260. 1  | 197 | 0. 38141 | 9. 550109863 | 1  |
| MSTRG. 13268. 1  | 85  | 0. 29427 | 9. 445007324 | 1  |
| MSTRG. 13268. 2  | 745 | 0. 42546 | 7. 484558105 | 1  |
| MSTRG. 13268. 3  | 202 | 0. 33097 | 9. 84967041  | 1  |
| MSTRG. 13268. 4  | 181 | 0. 30917 | 8. 665588379 | 1  |
| MSTRG. 13268. 5  | 123 | 0. 38855 | 9. 84552002  | 1  |
| MSTRG. 13269. 1  | 150 | 0. 32603 | 8. 987365723 | 1  |
| MSTRG. 13268. 8  | 70  | 0. 34463 | 9. 930236816 | 1  |
| MSTRG. 13270. 1  | 87  | 0. 30877 | 10. 78973389 | 1  |
| MSTRG. 13273. 4  | 449 | 0. 41466 | 6. 413513184 | 1  |
| MSTRG. 13281. 1  | 343 | 0. 38169 | 9. 201965332 | 1  |
| MSTRG. 13281. 2  | 48  | 0. 43849 | 6. 815124512 | 1  |
| MSTRG. 13282. 2  | 17  | 0. 40922 | 5. 218933105 | 1  |
| MSTRG. 13284. 8  | 196 | 0. 30709 | 6. 298522949 | 1  |
| MSTRG. 13284. 6  | 472 | 0. 41325 | 7. 886047363 | 1  |
| MSTRG. 13284. 9  | 107 | 0. 27763 | 6. 223815918 | 1  |
| MSTRG. 13284. 10 | 325 | 0. 41993 | 8. 544616699 | 1  |
| MSTRG. 13277. 1  | 104 | 0. 37637 | 5. 415222168 | 1  |
| MSTRG. 13277. 2  | 97  | 0. 32717 | 6. 820251465 | 1  |
| MSTRG. 13286. 3  | 215 | 0. 28823 | 9. 047180176 | 1  |
| MSTRG. 13287. 1  | 56  | 0. 34479 | 11. 4196167  | 1  |
| MSTRG. 13303. 1  | 137 | 0. 42616 | 5. 282287598 | 1  |
| MSTRG. 13305. 1  | 29  | 0. 35962 | 4. 55657959  | 1  |
| MSTRG. 13314. 1  | 423 | 0. 29772 | 7. 955749512 | 1  |
| MSTRG. 13314. 3  | 212 | 0. 2903  | 9. 683776855 | 1  |
| MSTRG. 13314. 2  | 329 | 0. 28671 | 9. 105163574 | 1  |
| MSTRG. 13323. 1  | 97  | 0. 30488 | 10. 48858643 | 1  |
| MSTRG. 13323. 2  | 50  | 0. 32138 | 9. 691345215 | 1  |
| MSTRG. 13320. 3  | 444 | 0. 38998 | 10. 06585693 | 1  |
| MSTRG. 13320. 4  | 189 | 0. 29547 | 9. 861022949 | 1  |
| MSTRG. 13320. 5  | 482 | 0. 40384 | 10. 12200928 | 1  |
| MSTRG. 13320. 6  | 189 | 0. 28478 | 9. 861022949 | 1  |
| MSTRG. 13320. 7  | 189 | 0. 38685 | 9. 861022949 | 1  |
| MSTRG. 13320. 9  | 65  | 0. 30661 | 8. 804748535 | 1  |
| MSTRG. 13324. 1  | 221 | 0. 28478 | 9. 90802002  | 1  |
| MSTRG. 13325. 1  | 72  | 0. 29615 | 6. 001037598 | 1  |
| MSTRG. 13327. 1  | 244 | 0. 28338 | 8. 70513916  | 1  |
| MSTRG. 13329. 1  | 54  | 0. 29861 | 5. 563659668 | 1  |
| MSTRG. 13331. 1  | 58  | 0. 34643 | 9. 25970459  | 1  |
| MSTRG. 13332. 1  | 54  | 0. 42061 | 9. 605651855 | -1 |
| MSTRG. 13332. 2  | 35  | 0. 38695 | 10. 28643799 | 1  |
| MSTRG. 13332. 3  | 87  | 0. 31478 | 8. 507507324 | 1  |
| MSTRG. 13334. 1  | 68  | 0. 34305 | 6. 71295166  | 1  |
| MSTRG. 13334. 4  | 70  | 0. 28167 | 6. 360534668 | 1  |
| MSTRG. 13318. 1  | 661 | 0. 43585 | 6. 069763184 | 1  |
| MSTRG. 13345. 1  | 76  | 0. 39312 | 5. 425231934 | 1  |
| MSTRG. 13356. 1  | 617 | 0. 41438 | 7. 598449707 | 1  |
| MSTRG. 13357. 1  | 145 | 0. 32022 | 8. 38458252  | 1  |
| MSTRG. 13356. 3  | 453 | 0. 40571 | 8. 183288574 | 1  |
| MSTRG. 13356. 4  | 617 | 0. 35564 | 7. 598449707 | 1  |
| MSTRG. 13356. 5  | 191 | 0. 28883 | 6. 788513184 | 1  |
| MSTRG. 13364. 2  | 140 | 0. 36624 | 4. 824279785 | 1  |
| MSTRG. 13365. 1  | 33  | 0. 38809 | 4. 601013184 | -1 |

|                  |      |          |              |    |
|------------------|------|----------|--------------|----|
| MSTRG. 13366. 3  | 88   | 0. 31204 | 8. 977722168 | 1  |
| MSTRG. 13367. 1  | 34   | 0. 39413 | 8. 843200684 | -1 |
| MSTRG. 13367. 2  | 34   | 0. 36078 | 8. 843200684 | -1 |
| MSTRG. 13369. 2  | 151  | 0. 31369 | 8. 712463379 | 1  |
| MSTRG. 13369. 4  | 151  | 0. 33363 | 8. 712463379 | 1  |
| MSTRG. 13369. 3  | 151  | 0. 35673 | 8. 712463379 | 1  |
| MSTRG. 13378. 1  | 63   | 0. 32238 | 9. 573181152 | 1  |
| MSTRG. 13378. 2  | 63   | 0. 36507 | 9. 573181152 | 1  |
| MSTRG. 13381. 2  | 68   | 0. 33563 | 9. 149475098 | 1  |
| MSTRG. 13389. 1  | 782  | 0. 36837 | 6. 723815918 | 1  |
| MSTRG. 13391. 6  | 491  | 0. 4618  | 8. 933410645 | 1  |
| MSTRG. 13391. 3  | 575  | 0. 45413 | 7. 023010254 | 1  |
| MSTRG. 13396. 1  | 66   | 0. 3118  | 5. 053649902 | 1  |
| MSTRG. 13397. 1  | 129  | 0. 28982 | 10. 02630615 | 1  |
| MSTRG. 13398. 1  | 185  | 0. 30664 | 8. 52557373  | 1  |
| MSTRG. 13401. 1  | 100  | 0. 30972 | 8. 422912598 | 1  |
| MSTRG. 13409. 2  | 1548 | 0. 47572 | 5. 695739746 | 1  |
| MSTRG. 13410. 1  | 157  | 0. 30837 | 9. 442932129 | 1  |
| MSTRG. 13410. 2  | 157  | 0. 32955 | 9. 442932129 | 1  |
| MSTRG. 13409. 3  | 1486 | 0. 46957 | 5. 686340332 | 1  |
| MSTRG. 13409. 4  | 1233 | 0. 46883 | 5. 965637207 | 1  |
| MSTRG. 13409. 5  | 1176 | 0. 46883 | 5. 92401123  | 1  |
| MSTRG. 13409. 8  | 1069 | 0. 4673  | 8. 252258301 | 1  |
| MSTRG. 13409. 6  | 1138 | 0. 48742 | 7. 557312012 | 1  |
| MSTRG. 13409. 7  | 1069 | 0. 4673  | 8. 252258301 | 1  |
| MSTRG. 13409. 9  | 1138 | 0. 46947 | 7. 557312012 | 1  |
| MSTRG. 13411. 1  | 81   | 0. 32237 | 9. 426696777 | 1  |
| MSTRG. 13411. 4  | 651  | 0. 4714  | 4. 893371582 | 1  |
| MSTRG. 13423. 1  | 74   | 0. 33179 | 9. 055480957 | -1 |
| MSTRG. 13425. 1  | 179  | 0. 28419 | 9. 502502441 | 1  |
| MSTRG. 13427. 1  | 149  | 0. 31565 | 6. 585510254 | 1  |
| MSTRG. 13427. 2  | 238  | 0. 30644 | 5. 58782959  | 1  |
| MSTRG. 13427. 4  | 238  | 0. 35231 | 5. 58782959  | 1  |
| MSTRG. 13427. 3  | 149  | 0. 43896 | 6. 585510254 | 1  |
| MSTRG. 13427. 6  | 188  | 0. 36382 | 5. 798034668 | 1  |
| MSTRG. 13427. 8  | 197  | 0. 34416 | 5. 028015137 | 1  |
| MSTRG. 13427. 9  | 45   | 0. 39196 | 11. 88165283 | 1  |
| MSTRG. 13427. 10 | 66   | 0. 37054 | 11. 41766357 | 1  |
| MSTRG. 13427. 11 | 18   | 0. 4278  | 5. 583068848 | 1  |
| MSTRG. 13428. 1  | 189  | 0. 28982 | 10. 38995361 | 1  |
| MSTRG. 13428. 2  | 125  | 0. 27958 | 10. 11029053 | 1  |
| MSTRG. 13429. 1  | 143  | 0. 28982 | 9. 829650879 | 1  |
| MSTRG. 13430. 1  | 84   | 0. 37017 | 10. 94671631 | 1  |
| MSTRG. 13431. 1  | 140  | 0. 27433 | 11. 07843018 | 1  |
| MSTRG. 13431. 2  | 128  | 0. 3136  | 6. 017272949 | 1  |
| MSTRG. 13432. 1  | 100  | 0. 29772 | 5. 985534668 | 1  |
| MSTRG. 13413. 2  | 134  | 0. 43017 | 5. 36505127  | 1  |
| MSTRG. 13414. 1  | 200  | 0. 29754 | 10. 35028076 | 1  |
| MSTRG. 13418. 1  | 93   | 0. 26141 | 7. 93170166  | 1  |
| MSTRG. 13420. 1  | 286  | 0. 31035 | 8. 645202637 | 1  |
| MSTRG. 13421. 2  | 228  | 0. 35168 | 6. 065368652 | 1  |
| MSTRG. 13419. 1  | 30   | 0. 43381 | 9. 626525879 | -1 |
| MSTRG. 13419. 2  | 39   | 0. 36949 | 10. 05609131 | 1  |
| MSTRG. 13419. 3  | 37   | 0. 33815 | 5. 821105957 | 1  |

|                 |      |          |              |    |
|-----------------|------|----------|--------------|----|
| MSTRG. 13433. 1 | 119  | 0. 36687 | 9. 722351074 | 1  |
| MSTRG. 13437. 2 | 177  | 0. 37819 | 8. 38458252  | 1  |
| MSTRG. 13440. 1 | 62   | 0. 29561 | 9. 68963623  | 1  |
| MSTRG. 13449. 1 | 36   | 0. 35325 | 6. 045593262 | 1  |
| MSTRG. 13450. 3 | 630  | 0. 4162  | 5. 380065918 | 1  |
| MSTRG. 13450. 2 | 974  | 0. 3892  | 5. 90020752  | 1  |
| MSTRG. 13451. 1 | 61   | 0. 30159 | 10. 01495361 | 1  |
| MSTRG. 13454. 2 | 76   | 0. 33939 | 9. 895202637 | 1  |
| MSTRG. 13456. 1 | 120  | 0. 29366 | 5. 695861816 | 1  |
| MSTRG. 13456. 2 | 93   | 0. 26449 | 7. 543640137 | 1  |
| MSTRG. 13457. 1 | 89   | 0. 28478 | 10. 28717041 | 1  |
| MSTRG. 13459. 1 | 14   | 0. 45751 | 7. 976013184 | 1  |
| MSTRG. 13461. 6 | 163  | 0. 3163  | 9. 657653809 | 1  |
| MSTRG. 13461. 5 | 480  | 0. 37649 | 9. 335021973 | 1  |
| MSTRG. 13462. 1 | 36   | 0. 33013 | 8. 295471191 | 1  |
| MSTRG. 13481. 1 | 13   | 0. 4604  | 3. 998840332 | 1  |
| MSTRG. 13486. 2 | 194  | 0. 34432 | 8. 945251465 | 1  |
| MSTRG. 13492. 1 | 94   | 0. 35226 | 10. 4307251  | 1  |
| MSTRG. 13506. 1 | 56   | 0. 36477 | 10. 54095459 | 1  |
| MSTRG. 13506. 2 | 108  | 0. 39869 | 11. 54949951 | 1  |
| MSTRG. 13506. 3 | 108  | 0. 40273 | 11. 54949951 | 1  |
| MSTRG. 13506. 4 | 108  | 0. 41875 | 11. 54949951 | 1  |
| MSTRG. 13510. 1 | 1907 | 0. 40013 | 6. 520812988 | 1  |
| MSTRG. 13510. 2 | 1907 | 0. 46046 | 6. 520812988 | 1  |
| MSTRG. 13510. 3 | 1906 | 0. 4673  | 6. 520812988 | 1  |
| MSTRG. 13510. 4 | 1906 | 0. 44119 | 6. 520812988 | 1  |
| MSTRG. 13510. 5 | 1431 | 0. 44793 | 8. 075744629 | 1  |
| MSTRG. 13510. 6 | 1171 | 0. 46073 | 6. 487731934 | 1  |
| MSTRG. 13497. 2 | 650  | 0. 42861 | 5. 74041748  | 1  |
| MSTRG. 13504. 1 | 38   | 0. 37577 | 9. 304382324 | 1  |
| MSTRG. 13512. 4 | 403  | 0. 41149 | 6. 27142334  | 1  |
| MSTRG. 13512. 6 | 428  | 0. 48155 | 5. 742126465 | 1  |
| MSTRG. 13512. 3 | 552  | 0. 48192 | 6. 105651855 | 1  |
| MSTRG. 13512. 7 | 356  | 0. 44533 | 6. 094055176 | 1  |
| MSTRG. 13512. 8 | 356  | 0. 4501  | 6. 094055176 | 1  |
| MSTRG. 13512. 9 | 451  | 0. 4366  | 5. 785461426 | 1  |
| MSTRG. 13518. 1 | 425  | 0. 3458  | 6. 729797363 | 1  |
| MSTRG. 13518. 3 | 171  | 0. 29328 | 8. 684143066 | 1  |
| MSTRG. 13519. 1 | 314  | 0. 35314 | 4. 526794434 | 1  |
| MSTRG. 13520. 4 | 785  | 0. 46074 | 9. 434875488 | 1  |
| MSTRG. 13531. 1 | 143  | 0. 28803 | 9. 330749512 | 1  |
| MSTRG. 13532. 1 | 642  | 0. 42176 | 7. 076843262 | 1  |
| MSTRG. 13532. 3 | 65   | 0. 42433 | 8. 760437012 | 1  |
| MSTRG. 13532. 6 | 642  | 0. 42451 | 7. 076843262 | 1  |
| MSTRG. 13538. 2 | 488  | 0. 47472 | 8. 333190918 | 1  |
| MSTRG. 13540. 4 | 39   | 0. 46003 | 12. 847229   | 1  |
| MSTRG. 13543. 1 | 75   | 0. 47243 | 6. 498596191 | -1 |
| MSTRG. 13554. 1 | 213  | 0. 28982 | 8. 543762207 | 1  |
| MSTRG. 13555. 1 | 35   | 0. 3374  | 6. 530212402 | 1  |
| MSTRG. 13560. 2 | 179  | 0. 41442 | 8. 130187988 | 1  |
| MSTRG. 13560. 3 | 205  | 0. 38463 | 6. 627868652 | 1  |
| MSTRG. 13562. 1 | 114  | 0. 428   | 4. 259460449 | 1  |
| MSTRG. 13564. 1 | 772  | 0. 44283 | 6. 72454834  | 1  |
| MSTRG. 13564. 2 | 769  | 0. 39517 | 6. 72454834  | 1  |

|                  |      |          |              |    |
|------------------|------|----------|--------------|----|
| MSTRG. 13563. 1  | 161  | 0. 28305 | 9. 148254395 | 1  |
| MSTRG. 13563. 2  | 50   | 0. 35626 | 9. 497619629 | 1  |
| MSTRG. 13566. 3  | 1376 | 0. 4661  | 6. 336608887 | 1  |
| MSTRG. 13568. 5  | 391  | 0. 46974 | 8. 442443848 | 1  |
| MSTRG. 13568. 6  | 458  | 0. 47097 | 6. 741882324 | 1  |
| MSTRG. 13570. 1  | 1017 | 0. 30827 | 8. 14239502  | 1  |
| MSTRG. 13578. 1  | 1916 | 0. 37291 | 9. 117736816 | 1  |
| MSTRG. 13578. 4  | 526  | 0. 3582  | 7. 468322754 | 1  |
| MSTRG. 13578. 2  | 1845 | 0. 37975 | 9. 226135254 | 1  |
| MSTRG. 13578. 3  | 1935 | 0. 37291 | 9. 088439941 | 1  |
| MSTRG. 13578. 6  | 1895 | 0. 37291 | 9. 112731934 | 1  |
| MSTRG. 13578. 7  | 1936 | 0. 37291 | 9. 088439941 | 1  |
| MSTRG. 13578. 8  | 1864 | 0. 37975 | 9. 198181152 | 1  |
| MSTRG. 13578. 9  | 1917 | 0. 37975 | 9. 117736816 | 1  |
| MSTRG. 13578. 10 | 1153 | 0. 3251  | 9. 533630371 | 1  |
| MSTRG. 13578. 11 | 1298 | 0. 34512 | 9. 617248535 | 1  |
| MSTRG. 13579. 1  | 183  | 0. 33783 | 11. 46160889 | 1  |
| MSTRG. 13580. 1  | 73   | 0. 4179  | 5. 980407715 | 1  |
| MSTRG. 13580. 2  | 47   | 0. 37998 | 5. 303771973 | 1  |
| MSTRG. 13578. 12 | 756  | 0. 46587 | 6. 667541504 | 1  |
| MSTRG. 13578. 13 | 774  | 0. 36467 | 6. 584655762 | 1  |
| MSTRG. 13578. 14 | 755  | 0. 34547 | 6. 667541504 | 1  |
| MSTRG. 13578. 15 | 756  | 0. 46359 | 6. 667541504 | 1  |
| MSTRG. 13578. 16 | 558  | 0. 37142 | 6. 281677246 | 1  |
| MSTRG. 13581. 1  | 130  | 0. 39812 | 11. 269104   | -1 |
| MSTRG. 13583. 1  | 122  | 0. 30708 | 10. 22723389 | 1  |
| MSTRG. 13584. 2  | 94   | 0. 39842 | 9. 61895752  | 1  |
| MSTRG. 13572. 3  | 596  | 0. 46477 | 8. 199157715 | 1  |
| MSTRG. 13573. 4  | 404  | 0. 45897 | 5. 900939941 | 1  |
| MSTRG. 13573. 5  | 384  | 0. 46717 | 5. 68170166  | 1  |
| MSTRG. 13573. 3  | 499  | 0. 41403 | 6. 900939941 | 1  |
| MSTRG. 13573. 7  | 498  | 0. 43712 | 6. 900939941 | 1  |
| MSTRG. 13573. 1  | 498  | 0. 41707 | 6. 900939941 | 1  |
| MSTRG. 13575. 2  | 382  | 0. 37041 | 8. 770324707 | 1  |
| MSTRG. 13576. 4  | 337  | 0. 4321  | 5. 674255371 | 1  |
| MSTRG. 13576. 3  | 337  | 0. 44468 | 5. 674255371 | 1  |
| MSTRG. 13576. 5  | 346  | 0. 36759 | 5. 33416748  | 1  |
| MSTRG. 13576. 6  | 210  | 0. 36759 | 8. 785827637 | 1  |
| MSTRG. 13576. 7  | 220  | 0. 40668 | 7. 675720215 | 1  |
| MSTRG. 13576. 8  | 346  | 0. 37647 | 5. 33416748  | 1  |
| MSTRG. 13576. 9  | 373  | 0. 39492 | 5. 772155762 | 1  |
| MSTRG. 13577. 2  | 46   | 0. 36457 | 3. 434265137 | 1  |
| MSTRG. 13577. 1  | 110  | 0. 33069 | 3. 940734863 | 1  |
| MSTRG. 13577. 5  | 222  | 0. 41408 | 4. 917541504 | 1  |
| MSTRG. 13577. 9  | 46   | 0. 39643 | 3. 434265137 | 1  |
| MSTRG. 13577. 10 | 118  | 0. 4384  | 5. 037780762 | 1  |
| MSTRG. 13577. 11 | 182  | 0. 41654 | 4. 518005371 | 1  |
| MSTRG. 13577. 6  | 110  | 0. 36879 | 3. 940734863 | 1  |
| MSTRG. 13577. 7  | 134  | 0. 40981 | 6. 278015137 | 1  |
| MSTRG. 13577. 8  | 110  | 0. 36879 | 3. 940734863 | 1  |
| MSTRG. 13577. 12 | 64   | 0. 36604 | 4. 328796387 | 1  |
| MSTRG. 13589. 3  | 576  | 0. 36364 | 8. 702697754 | 1  |
| MSTRG. 13589. 4  | 182  | 0. 35925 | 9. 85369873  | 1  |
| MSTRG. 13589. 7  | 202  | 0. 33506 | 4. 132019043 | 1  |

|                  |      |          |              |    |
|------------------|------|----------|--------------|----|
| MSTRG. 13589. 6  | 555  | 0. 3351  | 4. 968322754 | 1  |
| MSTRG. 13591. 1  | 48   | 0. 30656 | 9. 516662598 | 1  |
| MSTRG. 13593. 5  | 565  | 0. 46638 | 7. 859680176 | 1  |
| MSTRG. 13593. 6  | 572  | 0. 46815 | 7. 863220215 | 1  |
| MSTRG. 13593. 7  | 507  | 0. 45182 | 7. 531433105 | 1  |
| MSTRG. 13594. 1  | 80   | 0. 35756 | 7. 026794434 | 1  |
| MSTRG. 13593. 8  | 507  | 0. 41088 | 7. 531433105 | 1  |
| MSTRG. 13595. 2  | 407  | 0. 4095  | 5. 66583252  | 1  |
| MSTRG. 13595. 1  | 347  | 0. 41202 | 5. 152770996 | 1  |
| MSTRG. 13596. 1  | 85   | 0. 27767 | 6. 823547363 | 1  |
| MSTRG. 13597. 1  | 132  | 0. 29848 | 10. 11029053 | 1  |
| MSTRG. 13586. 1  | 1453 | 0. 42475 | 6. 268249512 | 1  |
| MSTRG. 13586. 2  | 1453 | 0. 45492 | 6. 268249512 | 1  |
| MSTRG. 13586. 3  | 1433 | 0. 41266 | 6. 334411621 | 1  |
| MSTRG. 13587. 1  | 67   | 0. 26785 | 5. 203430176 | 1  |
| MSTRG. 13598. 2  | 104  | 0. 36207 | 4. 508483887 | 1  |
| MSTRG. 13599. 1  | 355  | 0. 34715 | 8. 955627441 | 1  |
| MSTRG. 13599. 2  | 282  | 0. 42248 | 6. 188659668 | 1  |
| MSTRG. 13599. 3  | 282  | 0. 40032 | 6. 188659668 | 1  |
| MSTRG. 13599. 4  | 153  | 0. 34196 | 7. 756896973 | 1  |
| MSTRG. 13602. 1  | 315  | 0. 43032 | 4. 725158691 | 1  |
| MSTRG. 13602. 3  | 315  | 0. 40851 | 4. 725158691 | 1  |
| MSTRG. 13602. 5  | 315  | 0. 41213 | 4. 725158691 | 1  |
| MSTRG. 13600. 1  | 161  | 0. 32565 | 7. 497009277 | -1 |
| MSTRG. 13603. 1  | 89   | 0. 36983 | 8. 635681152 | 1  |
| MSTRG. 13603. 2  | 151  | 0. 30697 | 10. 57281494 | 1  |
| MSTRG. 13608. 3  | 676  | 0. 38017 | 7. 274475098 | 1  |
| MSTRG. 13608. 2  | 676  | 0. 38106 | 7. 274475098 | 1  |
| MSTRG. 13608. 6  | 676  | 0. 45676 | 7. 274475098 | 1  |
| MSTRG. 13608. 5  | 676  | 0. 458   | 7. 274475098 | 1  |
| MSTRG. 13605. 1  | 901  | 0. 37917 | 5. 251525879 | 1  |
| MSTRG. 13612. 2  | 130  | 0. 36554 | 5. 768981934 | 1  |
| MSTRG. 13614. 2  | 587  | 0. 45031 | 6. 642883301 | 1  |
| MSTRG. 13618. 3  | 127  | 0. 44413 | 6. 577575684 | 1  |
| MSTRG. 13618. 1  | 222  | 0. 36341 | 4. 614074707 | 1  |
| MSTRG. 13618. 2  | 222  | 0. 34063 | 4. 614074707 | 1  |
| MSTRG. 13627. 2  | 1070 | 0. 36123 | 6. 113708496 | 1  |
| MSTRG. 13627. 3  | 1070 | 0. 38518 | 6. 113708496 | 1  |
| MSTRG. 13630. 1  | 435  | 0. 45833 | 5. 762390137 | 1  |
| MSTRG. 13637. 2  | 358  | 0. 36515 | 5. 328796387 | 1  |
| MSTRG. 13657. 4  | 193  | 0. 31207 | 5. 403747559 | 1  |
| MSTRG. 13658. 8  | 539  | 0. 41896 | 4. 963562012 | 1  |
| MSTRG. 13666. 4  | 102  | 0. 39607 | 5. 854919434 | 1  |
| MSTRG. 13666. 3  | 142  | 0. 4289  | 5. 048278809 | 1  |
| MSTRG. 13666. 5  | 102  | 0. 4315  | 5. 854919434 | 1  |
| MSTRG. 13666. 2  | 102  | 0. 40298 | 5. 854919434 | 1  |
| MSTRG. 13667. 1  | 1290 | 0. 50382 | 5. 597229004 | 1  |
| MSTRG. 13667. 5  | 793  | 0. 34385 | 4. 929382324 | 1  |
| MSTRG. 13667. 6  | 1249 | 0. 50382 | 5. 695617676 | 1  |
| MSTRG. 13667. 13 | 559  | 0. 3458  | 9. 414001465 | 1  |
| MSTRG. 13667. 12 | 229  | 0. 32961 | 10. 6696167  | 1  |
| MSTRG. 13652. 1  | 289  | 0. 37154 | 6. 750427246 | 1  |
| MSTRG. 13652. 2  | 289  | 0. 41565 | 6. 750427246 | 1  |
| MSTRG. 13652. 3  | 25   | 0. 37315 | 9. 497009277 | 1  |

|                 |      |         |             |    |
|-----------------|------|---------|-------------|----|
| MSTRG. 13653.2  | 336  | 0.38505 | 8.72845459  | 1  |
| MSTRG. 13653.3  | 160  | 0.38895 | 6.286560059 | 1  |
| MSTRG. 13669.2  | 540  | 0.44383 | 5.906433105 | 1  |
| MSTRG. 13671.1  | 72   | 0.33311 | 7.848327637 | 1  |
| MSTRG. 13672.6  | 213  | 0.46582 | 6.848205566 | 1  |
| MSTRG. 13672.5  | 213  | 0.46954 | 6.848205566 | 1  |
| MSTRG. 13672.4  | 213  | 0.45743 | 6.848205566 | 1  |
| MSTRG. 13682.1  | 68   | 0.37465 | 5.33392334  | 1  |
| MSTRG. 13684.1  | 90   | 0.45742 | 8.93548584  | 1  |
| MSTRG. 13687.2  | 39   | 0.44671 | 10.78057861 | 1  |
| MSTRG. 13690.1  | 161  | 0.39037 | 4.66229248  | 1  |
| MSTRG. 13690.2  | 177  | 0.38919 | 5.805480957 | 1  |
| MSTRG. 13690.5  | 120  | 0.37014 | 9.460388184 | -1 |
| MSTRG. 13690.3  | 161  | 0.42039 | 4.66229248  | 1  |
| MSTRG. 13690.4  | 120  | 0.39471 | 9.460388184 | -1 |
| MSTRG. 13711.1  | 2583 | 0.40572 | 6.026428223 | 1  |
| MSTRG. 13711.2  | 2304 | 0.48574 | 6.208312988 | 1  |
| MSTRG. 13711.3  | 2377 | 0.45855 | 6.080749512 | 1  |
| MSTRG. 13711.4  | 2583 | 0.48729 | 6.026428223 | 1  |
| MSTRG. 13711.5  | 2583 | 0.40572 | 6.026428223 | 1  |
| MSTRG. 13711.6  | 2244 | 0.46421 | 6.392883301 | 1  |
| MSTRG. 13713.1  | 601  | 0.45045 | 4.68560791  | 1  |
| MSTRG. 13713.3  | 611  | 0.4539  | 4.721862793 | 1  |
| MSTRG. 13713.2  | 612  | 0.4616  | 4.721862793 | 1  |
| MSTRG. 13706.1  | 293  | 0.4027  | 4.944519043 | 1  |
| MSTRG. 13706.18 | 307  | 0.44069 | 4.952697754 | 1  |
| MSTRG. 13706.20 | 293  | 0.42989 | 4.944519043 | 1  |
| MSTRG. 13706.17 | 306  | 0.44355 | 4.952697754 | 1  |
| MSTRG. 13709.1  | 113  | 0.35162 | 8.860168457 | 1  |
| MSTRG. 13706.22 | 293  | 0.30509 | 4.944519043 | 1  |
| MSTRG. 13727.1  | 357  | 0.36272 | 5.491149902 | 1  |
| MSTRG. 13727.2  | 357  | 0.44109 | 5.491149902 | 1  |
| MSTRG. 13727.3  | 357  | 0.43547 | 5.491149902 | 1  |
| MSTRG. 13727.4  | 357  | 0.45553 | 5.491149902 | 1  |
| MSTRG. 13725.4  | 303  | 0.30958 | 8.85369873  | 1  |
| MSTRG. 13725.6  | 109  | 0.32721 | 8.898498535 | 1  |
| MSTRG. 13725.7  | 272  | 0.33828 | 8.853820801 | 1  |
| MSTRG. 13725.10 | 119  | 0.38888 | 9.776428223 | 1  |
| MSTRG. 13725.12 | 272  | 0.27075 | 8.853820801 | 1  |
| MSTRG. 13725.13 | 272  | 0.3485  | 8.853820801 | 1  |
| MSTRG. 13729.1  | 63   | 0.40631 | 6.234436035 | 1  |
| MSTRG. 13714.3  | 167  | 0.47155 | 9.52935791  | 1  |
| MSTRG. 13717.1  | 29   | 0.30328 | 9.186218262 | 1  |
| MSTRG. 13723.1  | 210  | 0.28199 | 6.080383301 | 1  |
| MSTRG. 13738.1  | 287  | 0.39805 | 9.120666504 | 1  |
| MSTRG. 13746.1  | 60   | 0.35775 | 6.874572754 | 1  |
| MSTRG. 13746.2  | 68   | 0.32408 | 6.874938965 | 1  |
| MSTRG. 13755.2  | 58   | 0.38343 | 10.58660889 | 1  |
| MSTRG. 13755.1  | 1150 | 0.3618  | 6.604797363 | 1  |
| MSTRG. 13755.3  | 1150 | 0.39138 | 6.604797363 | 1  |
| MSTRG. 13755.5  | 1150 | 0.46343 | 6.604797363 | 1  |
| MSTRG. 13755.6  | 1135 | 0.46174 | 6.797302246 | 1  |
| MSTRG. 13756.1  | 177  | 0.31432 | 9.631164551 | 1  |
| MSTRG. 13758.2  | 296  | 0.28808 | 9.499206543 | 1  |



|                |      |         |             |   |
|----------------|------|---------|-------------|---|
| MSTRG. 13758.3 | 117  | 0.28165 | 10.15020752 | 1 |
| MSTRG. 13758.4 | 80   | 0.34711 | 7.964050293 | 1 |
| MSTRG. 13750.1 | 29   | 0.4429  | 11.43719482 | 1 |
| MSTRG. 13760.1 | 157  | 0.36854 | 9.226135254 | 1 |
| MSTRG. 13760.2 | 47   | 0.29919 | 5.424865723 | 1 |
| MSTRG. 13759.2 | 224  | 0.43848 | 4.453430176 | 1 |
| MSTRG. 13761.2 | 2202 | 0.47438 | 5.268981934 | 1 |
| MSTRG. 13767.1 | 153  | 0.32324 | 9.300964355 | 1 |
| MSTRG. 13768.4 | 1419 | 0.42238 | 8.392028809 | 1 |
| MSTRG. 13768.3 | 1419 | 0.43624 | 8.392028809 | 1 |
| MSTRG. 13768.2 | 1419 | 0.4199  | 8.392028809 | 1 |
| MSTRG. 13768.5 | 632  | 0.40391 | 9.285949707 | 1 |
| MSTRG. 13769.1 | 183  | 0.33178 | 10.56329346 | 1 |
| MSTRG. 13768.7 | 350  | 0.39341 | 8.413391113 | 1 |
| MSTRG. 13765.1 | 933  | 0.4354  | 9.064758301 | 1 |
| MSTRG. 13765.2 | 926  | 0.41609 | 9.165344238 | 1 |
| MSTRG. 13764.1 | 377  | 0.48521 | 5.229431152 | 1 |
| MSTRG. 13780.2 | 51   | 0.34699 | 3.768493652 | 1 |
| MSTRG. 13782.1 | 209  | 0.31048 | 10.29351807 | 1 |
| MSTRG. 13780.3 | 75   | 0.30167 | 10.07830811 | 1 |
| MSTRG. 13783.1 | 103  | 0.3904  | 9.120666504 | 1 |
| MSTRG. 13784.1 | 55   | 0.28165 | 7.856384277 | 1 |
| MSTRG. 13808.1 | 239  | 0.30958 | 6.489929199 | 1 |
| MSTRG. 13808.3 | 281  | 0.37623 | 6.300231934 | 1 |
| MSTRG. 13808.4 | 281  | 0.34129 | 6.300231934 | 1 |
| MSTRG. 13808.2 | 281  | 0.34907 | 6.300231934 | 1 |
| MSTRG. 13808.5 | 115  | 0.29367 | 7.504211426 | 1 |
| MSTRG. 13809.1 | 69   | 0.34157 | 6.890930176 | 1 |
| MSTRG. 13811.1 | 99   | 0.36089 | 8.017883301 | 1 |
| MSTRG. 13819.3 | 218  | 0.49137 | 4.953674316 | 1 |
| MSTRG. 13820.1 | 36   | 0.34405 | 7.822692871 | 1 |
| MSTRG. 13813.1 | 35   | 0.33096 | 6.207336426 | 1 |
| MSTRG. 13822.1 | 53   | 0.34846 | 4.225524902 | 1 |
| MSTRG. 13829.1 | 43   | 0.36049 | 5.335266113 | 1 |
| MSTRG. 13831.2 | 89   | 0.37123 | 4.392028809 | 1 |
| MSTRG. 13831.3 | 462  | 0.42955 | 5.037414551 | 1 |
| MSTRG. 13832.1 | 79   | 0.37582 | 9.776062012 | 1 |
| MSTRG. 13831.4 | 322  | 0.42678 | 6.066101074 | 1 |
| MSTRG. 13836.1 | 445  | 0.39317 | 9.016906738 | 1 |
| MSTRG. 13837.1 | 99   | 0.29835 | 9.922912598 | 1 |
| MSTRG. 13838.5 | 1139 | 0.50132 | 5.715148926 | 1 |
| MSTRG. 13838.6 | 732  | 0.43561 | 8.280334473 | 1 |
| MSTRG. 13834.2 | 1048 | 0.47938 | 5.076965332 | 1 |
| MSTRG. 13844.2 | 477  | 0.26913 | 8.954162598 | 1 |
| MSTRG. 13844.4 | 775  | 0.36083 | 9.440002441 | 1 |
| MSTRG. 13845.1 | 182  | 0.33287 | 10.42034912 | 1 |
| MSTRG. 13846.1 | 356  | 0.45818 | 5.594543457 | 1 |
| MSTRG. 13846.2 | 264  | 0.44299 | 5.231140137 | 1 |
| MSTRG. 13854.3 | 482  | 0.44231 | 5.109680176 | 1 |
| MSTRG. 13849.2 | 167  | 0.35654 | 6.718811035 | 1 |
| MSTRG. 13858.2 | 1565 | 0.41327 | 9.363952637 | 1 |
| MSTRG. 13859.1 | 44   | 0.27781 | 10.20733643 | 1 |
| MSTRG. 13862.3 | 122  | 0.3363  | 7.57220459  | 1 |
| MSTRG. 13862.2 | 450  | 0.3799  | 6.444152832 | 1 |

|                  |      |          |              |    |
|------------------|------|----------|--------------|----|
| MSTRG. 13862. 4  | 450  | 0. 46956 | 6. 444152832 | 1  |
| MSTRG. 13862. 5  | 90   | 0. 43937 | 9. 061828613 | -1 |
| MSTRG. 13867. 1  | 462  | 0. 39189 | 10. 08355713 | 1  |
| MSTRG. 13870. 4  | 1089 | 0. 48204 | 6. 057189941 | 1  |
| MSTRG. 13871. 3  | 845  | 0. 44645 | 5. 207702637 | 1  |
| MSTRG. 13871. 4  | 803  | 0. 41774 | 6. 035827637 | 1  |
| MSTRG. 13877. 3  | 3004 | 0. 47254 | 6. 597351074 | 1  |
| MSTRG. 13877. 4  | 2955 | 0. 47254 | 6. 425231934 | 1  |
| MSTRG. 13877. 5  | 1525 | 0. 41193 | 5. 557556152 | 1  |
| MSTRG. 13884. 4  | 1504 | 0. 3943  | 6. 38079834  | 1  |
| MSTRG. 13884. 6  | 1504 | 0. 4184  | 6. 38079834  | 1  |
| MSTRG. 13884. 5  | 1504 | 0. 38965 | 6. 38079834  | 1  |
| MSTRG. 13884. 7  | 1504 | 0. 4184  | 6. 38079834  | 1  |
| MSTRG. 13884. 8  | 1034 | 0. 38965 | 5. 67791748  | 1  |
| MSTRG. 13885. 2  | 133  | 0. 33109 | 8. 230163574 | 1  |
| MSTRG. 13885. 3  | 216  | 0. 38556 | 5. 170349121 | 1  |
| MSTRG. 13882. 1  | 370  | 0. 35942 | 5. 618347168 | 1  |
| MSTRG. 13881. 1  | 225  | 0. 41572 | 4. 981994629 | 1  |
| MSTRG. 13886. 2  | 758  | 0. 42249 | 6. 483215332 | 1  |
| MSTRG. 13886. 5  | 427  | 0. 45936 | 8. 251647949 | 1  |
| MSTRG. 13888. 1  | 105  | 0. 39405 | 7. 690856934 | -1 |
| MSTRG. 13900. 1  | 76   | 0. 44381 | 11. 23284912 | 1  |
| MSTRG. 13902. 1  | 127  | 0. 33613 | 6. 393737793 | 1  |
| MSTRG. 13903. 3  | 1664 | 0. 45206 | 6. 590637207 | 1  |
| MSTRG. 13904. 1  | 71   | 0. 43616 | 9. 588806152 | 1  |
| MSTRG. 13908. 1  | 4465 | 0. 39685 | 6. 22869873  | 1  |
| MSTRG. 13908. 2  | 3607 | 0. 37607 | 5. 873962402 | 1  |
| MSTRG. 13910. 2  | 1195 | 0. 4547  | 6. 661804199 | 1  |
| MSTRG. 13910. 5  | 1236 | 0. 4205  | 6. 542785645 | 1  |
| MSTRG. 13910. 6  | 1150 | 0. 43224 | 6. 473205566 | 1  |
| MSTRG. 13913. 3  | 1232 | 0. 44684 | 5. 670715332 | 1  |
| MSTRG. 13913. 4  | 98   | 0. 31268 | 6. 710754395 | 1  |
| MSTRG. 13891. 1  | 98   | 0. 33184 | 8. 986755371 | 1  |
| MSTRG. 13899. 1  | 73   | 0. 2787  | 9. 382019043 | 1  |
| MSTRG. 13918. 2  | 131  | 0. 29879 | 10. 43939209 | 1  |
| MSTRG. 13918. 3  | 106  | 0. 37994 | 10. 5927124  | 1  |
| MSTRG. 13919. 2  | 446  | 0. 37033 | 8. 341003418 | 1  |
| MSTRG. 13919. 1  | 380  | 0. 32846 | 7. 136169434 | 1  |
| MSTRG. 13940. 1  | 82   | 0. 30492 | 9. 585021973 | 1  |
| MSTRG. 13941. 2  | 334  | 0. 42716 | 7. 280700684 | 1  |
| MSTRG. 13941. 3  | 334  | 0. 45511 | 7. 280700684 | 1  |
| MSTRG. 13942. 1  | 93   | 0. 33158 | 6. 057067871 | 1  |
| MSTRG. 13942. 2  | 50   | 0. 35915 | 6. 706726074 | 1  |
| MSTRG. 13942. 3  | 81   | 0. 34    | 9. 936340332 | -1 |
| MSTRG. 13942. 4  | 41   | 0. 31427 | 10. 59552002 | 1  |
| MSTRG. 13942. 5  | 58   | 0. 3291  | 10. 28094482 | -1 |
| MSTRG. 13942. 6  | 67   | 0. 38028 | 9. 097717285 | -1 |
| MSTRG. 13942. 7  | 40   | 0. 40224 | 10. 59552002 | -1 |
| MSTRG. 13942. 10 | 45   | 0. 36871 | 7. 978942871 | 1  |
| MSTRG. 13942. 11 | 16   | 0. 35959 | 10. 7366333  | 1  |
| MSTRG. 13942. 12 | 16   | 0. 42051 | 10. 7366333  | 1  |
| MSTRG. 13942. 8  | 16   | 0. 3379  | 10. 7366333  | 1  |
| MSTRG. 13942. 9  | 16   | 0. 41711 | 10. 7366333  | 1  |
| MSTRG. 13942. 13 | 16   | 0. 40665 | 10. 7366333  | 1  |

|                  |      |          |              |    |
|------------------|------|----------|--------------|----|
| MSTRG. 13942. 17 | 16   | 0. 35959 | 10. 7366333  | 1  |
| MSTRG. 13942. 18 | 16   | 0. 37131 | 10. 7366333  | 1  |
| MSTRG. 13942. 19 | 20   | 0. 32711 | 9. 976501465 | 1  |
| MSTRG. 13942. 20 | 16   | 0. 42083 | 10. 7366333  | 1  |
| MSTRG. 13942. 14 | 16   | 0. 36176 | 10. 7366333  | 1  |
| MSTRG. 13942. 15 | 16   | 0. 41298 | 10. 7366333  | 1  |
| MSTRG. 13942. 16 | 50   | 0. 37309 | 8. 937194824 | 1  |
| MSTRG. 13942. 21 | 16   | 0. 36145 | 10. 7366333  | 1  |
| MSTRG. 13942. 22 | 16   | 0. 35676 | 10. 7366333  | 1  |
| MSTRG. 13942. 25 | 21   | 0. 3318  | 9. 976501465 | 1  |
| MSTRG. 13942. 27 | 16   | 0. 33554 | 10. 7366333  | 1  |
| MSTRG. 13942. 28 | 16   | 0. 36145 | 10. 7366333  | 1  |
| MSTRG. 13942. 29 | 30   | 0. 37948 | 8. 939025879 | 1  |
| MSTRG. 13942. 30 | 16   | 0. 38288 | 10. 7366333  | 1  |
| MSTRG. 13942. 31 | 16   | 0. 41529 | 10. 7366333  | 1  |
| MSTRG. 13942. 23 | 16   | 0. 42299 | 10. 7366333  | 1  |
| MSTRG. 13942. 24 | 16   | 0. 34171 | 10. 7366333  | 1  |
| MSTRG. 13942. 26 | 16   | 0. 35959 | 10. 7366333  | 1  |
| MSTRG. 13942. 32 | 16   | 0. 41529 | 10. 7366333  | 1  |
| MSTRG. 13942. 33 | 31   | 0. 36638 | 10. 66680908 | -1 |
| MSTRG. 13927. 1  | 229  | 0. 30394 | 4. 810119629 | 1  |
| MSTRG. 13928. 2  | 1256 | 0. 45308 | 6. 774597168 | -1 |
| MSTRG. 13944. 3  | 684  | 0. 45193 | 7. 84576416  | 1  |
| MSTRG. 13945. 1  | 50   | 0. 35526 | 12. 31060791 | 1  |
| MSTRG. 13946. 3  | 475  | 0. 45816 | 5. 86505127  | 1  |
| MSTRG. 13929. 2  | 384  | 0. 40285 | 9. 11517334  | 1  |
| MSTRG. 13930. 2  | 63   | 0. 30901 | 6. 227355957 | 1  |
| MSTRG. 13952. 1  | 302  | 0. 39501 | 5. 094299316 | 1  |
| MSTRG. 13952. 2  | 284  | 0. 47004 | 4. 837097168 | 1  |
| MSTRG. 13952. 3  | 147  | 0. 45086 | 5. 240661621 | 1  |
| MSTRG. 13955. 1  | 127  | 0. 3767  | 9. 713562012 | 1  |
| MSTRG. 13962. 2  | 73   | 0. 37513 | 11. 46514893 | 1  |
| MSTRG. 13964. 1  | 49   | 0. 42745 | 5. 727111816 | 1  |
| MSTRG. 13965. 1  | 69   | 0. 42004 | 9. 355773926 | 1  |
| MSTRG. 13969. 2  | 40   | 0. 34289 | 5. 49786377  | 1  |
| MSTRG. 13971. 1  | 73   | 0. 38287 | 9. 488098145 | 1  |
| MSTRG. 13981. 1  | 50   | 0. 3462  | 8. 931213379 | 1  |
| MSTRG. 13981. 2  | 50   | 0. 36295 | 8. 931213379 | 1  |
| MSTRG. 13982. 1  | 66   | 0. 37805 | 5. 64251709  | 1  |
| MSTRG. 13983. 1  | 99   | 0. 39032 | 4. 902038574 | 1  |
| MSTRG. 13984. 1  | 741  | 0. 30721 | 8. 646057129 | 1  |
| MSTRG. 13984. 3  | 741  | 0. 31369 | 8. 646057129 | 1  |
| MSTRG. 13984. 4  | 741  | 0. 40204 | 8. 646057129 | 1  |
| MSTRG. 13986. 1  | 77   | 0. 31035 | 9. 020568848 | 1  |
| MSTRG. 13980. 2  | 65   | 0. 29343 | 7. 960388184 | 1  |
| MSTRG. 14009. 1  | 4855 | 0. 45965 | 5. 701843262 | 1  |
| MSTRG. 14009. 2  | 4855 | 0. 45461 | 5. 718688965 | 1  |
| MSTRG. 14009. 3  | 4841 | 0. 45965 | 5. 718566895 | 1  |
| MSTRG. 14009. 4  | 4856 | 0. 45965 | 5. 727233887 | 1  |
| MSTRG. 14010. 7  | 268  | 0. 29793 | 7. 566467285 | 1  |
| MSTRG. 14010. 6  | 435  | 0. 39288 | 8. 505554199 | 1  |
| MSTRG. 14010. 8  | 256  | 0. 43599 | 7. 965759277 | 1  |
| MSTRG. 14010. 9  | 202  | 0. 27643 | 8. 649719238 | 1  |
| MSTRG. 13999. 1  | 94   | 0. 35231 | 9. 510070801 | 1  |

|                  |     |          |              |    |
|------------------|-----|----------|--------------|----|
| MSTRG. 14003. 1  | 141 | 0. 32573 | 9. 659240723 | 1  |
| MSTRG. 14003. 4  | 16  | 0. 35989 | 12. 30108643 | 1  |
| MSTRG. 14001. 2  | 339 | 0. 40654 | 8. 755310059 | 1  |
| MSTRG. 14014. 1  | 33  | 0. 45113 | 4. 780578613 | -1 |
| MSTRG. 14034. 2  | 82  | 0. 34159 | 8. 968811035 | 1  |
| MSTRG. 14035. 1  | 112 | 0. 35915 | 8. 861022949 | 1  |
| MSTRG. 14036. 1  | 124 | 0. 29772 | 9. 326843262 | 1  |
| MSTRG. 14037. 1  | 208 | 0. 32518 | 9. 336242676 | 1  |
| MSTRG. 14036. 2  | 89  | 0. 28584 | 8. 982727051 | 1  |
| MSTRG. 14038. 1  | 68  | 0. 3152  | 9. 506286621 | 1  |
| MSTRG. 14038. 2  | 76  | 0. 34162 | 8. 274230957 | 1  |
| MSTRG. 14039. 1  | 163 | 0. 29772 | 9. 316345215 | 1  |
| MSTRG. 14039. 2  | 201 | 0. 29367 | 9. 042419434 | 1  |
| MSTRG. 14041. 1  | 146 | 0. 28923 | 9. 825134277 | 1  |
| MSTRG. 14034. 3  | 386 | 0. 3582  | 5. 307312012 | 1  |
| MSTRG. 14034. 5  | 85  | 0. 29772 | 6. 157409668 | 1  |
| MSTRG. 14034. 6  | 468 | 0. 40208 | 6. 25189209  | 1  |
| MSTRG. 14043. 1  | 62  | 0. 35756 | 8. 766784668 | 1  |
| MSTRG. 14026. 1  | 105 | 0. 38962 | 4. 773620605 | 1  |
| MSTRG. 14029. 2  | 76  | 0. 38407 | 6. 72064209  | -1 |
| MSTRG. 14030. 1  | 58  | 0. 29176 | 9. 945495605 | 1  |
| MSTRG. 14059. 4  | 986 | 0. 46535 | 6. 757873535 | 1  |
| MSTRG. 14059. 3  | 995 | 0. 43617 | 6. 805236816 | 1  |
| MSTRG. 14059. 5  | 985 | 0. 4374  | 6. 757873535 | 1  |
| MSTRG. 14059. 6  | 994 | 0. 4374  | 6. 713684082 | 1  |
| MSTRG. 14060. 2  | 68  | 0. 34328 | 4. 66973877  | 1  |
| MSTRG. 14063. 1  | 61  | 0. 31176 | 6. 008972168 | 1  |
| MSTRG. 14066. 3  | 600 | 0. 46372 | 10. 34039307 | 1  |
| MSTRG. 14047. 1  | 28  | 0. 3345  | 5. 939025879 | 1  |
| MSTRG. 14050. 4  | 272 | 0. 44118 | 5. 628479004 | 1  |
| MSTRG. 14069. 1  | 370 | 0. 28883 | 6. 340148926 | 1  |
| MSTRG. 14069. 2  | 154 | 0. 3319  | 10. 41326904 | 1  |
| MSTRG. 14075. 1  | 682 | 0. 44835 | 6. 515319824 | 1  |
| MSTRG. 14075. 6  | 580 | 0. 4072  | 7. 116760254 | 1  |
| MSTRG. 14076. 1  | 70  | 0. 29849 | 11. 32415771 | 1  |
| MSTRG. 14077. 1  | 405 | 0. 34437 | 6. 769836426 | 1  |
| MSTRG. 14077. 2  | 205 | 0. 41804 | 5. 985778809 | 1  |
| MSTRG. 14079. 1  | 183 | 0. 28026 | 10. 96490479 | 1  |
| MSTRG. 14079. 2  | 94  | 0. 26101 | 9. 989196777 | 1  |
| MSTRG. 14081. 1  | 75  | 0. 25685 | 5. 722473145 | 1  |
| MSTRG. 14082. 1  | 74  | 0. 35594 | 6. 528503418 | 1  |
| MSTRG. 14083. 1  | 64  | 0. 31903 | 7. 866760254 | 1  |
| MSTRG. 14084. 1  | 249 | 0. 38643 | 9. 864685059 | 1  |
| MSTRG. 14085. 1  | 441 | 0. 29615 | 9. 058532715 | 1  |
| MSTRG. 14093. 10 | 802 | 0. 38486 | 9. 156799316 | 1  |
| MSTRG. 14093. 11 | 794 | 0. 36226 | 9. 183654785 | 1  |
| MSTRG. 14093. 4  | 802 | 0. 32102 | 9. 156799316 | 1  |
| MSTRG. 14093. 5  | 733 | 0. 32318 | 9. 225280762 | 1  |
| MSTRG. 14093. 6  | 733 | 0. 38109 | 9. 225280762 | 1  |
| MSTRG. 14093. 7  | 794 | 0. 36226 | 9. 183654785 | 1  |
| MSTRG. 14093. 9  | 733 | 0. 35854 | 9. 225280762 | 1  |
| MSTRG. 14093. 12 | 794 | 0. 31501 | 9. 183654785 | 1  |
| MSTRG. 14094. 1  | 118 | 0. 29308 | 11. 44769287 | 1  |
| MSTRG. 14095. 1  | 114 | 0. 31293 | 5. 071350098 | 1  |

|                  |      |          |              |    |
|------------------|------|----------|--------------|----|
| MSTRG. 14099. 1  | 263  | 0. 40013 | 8. 796447754 | -1 |
| MSTRG. 14100. 2  | 273  | 0. 42614 | 5. 862854004 | 1  |
| MSTRG. 14089. 2  | 270  | 0. 30957 | 8. 934753418 | 1  |
| MSTRG. 14109. 1  | 34   | 0. 32987 | 6. 484436035 | 1  |
| MSTRG. 14115. 3  | 768  | 0. 38074 | 5. 620300293 | 1  |
| MSTRG. 14126. 1  | 63   | 0. 36477 | 5. 963928223 | 1  |
| MSTRG. 14127. 1  | 158  | 0. 36237 | 4. 762634277 | 1  |
| MSTRG. 14130. 1  | 124  | 0. 35516 | 10. 41107178 | 1  |
| MSTRG. 14141. 6  | 1087 | 0. 44901 | 7. 350036621 | 1  |
| MSTRG. 14141. 9  | 1087 | 0. 46941 | 7. 350036621 | 1  |
| MSTRG. 14141. 7  | 974  | 0. 43007 | 6. 356750488 | 1  |
| MSTRG. 14141. 11 | 79   | 0. 27517 | 5. 024230957 | 1  |
| MSTRG. 14142. 3  | 1871 | 0. 42119 | 8. 55255127  | 1  |
| MSTRG. 14142. 4  | 1846 | 0. 49993 | 8. 52911377  | 1  |
| MSTRG. 14143. 1  | 20   | 0. 34773 | 7. 858581543 | 1  |
| MSTRG. 14144. 2  | 254  | 0. 33585 | 7. 993835449 | 1  |
| MSTRG. 14147. 1  | 168  | 0. 2943  | 6. 82208252  | 1  |
| MSTRG. 14147. 2  | 60   | 0. 31793 | 5. 59552002  | 1  |
| MSTRG. 14153. 2  | 160  | 0. 44409 | 9. 615539551 | 1  |
| MSTRG. 14153. 3  | 160  | 0. 41954 | 9. 615539551 | 1  |
| MSTRG. 14157. 1  | 137  | 0. 28063 | 9. 459533691 | 1  |
| MSTRG. 14157. 2  | 137  | 0. 28842 | 9. 459533691 | 1  |
| MSTRG. 14157. 4  | 137  | 0. 28923 | 9. 459533691 | 1  |
| MSTRG. 14157. 3  | 183  | 0. 28842 | 11. 17718506 | 1  |
| MSTRG. 14157. 5  | 183  | 0. 28923 | 11. 17718506 | 1  |
| MSTRG. 14167. 1  | 122  | 0. 32061 | 11. 3706665  | -1 |
| MSTRG. 14172. 1  | 19   | 0. 40378 | 5. 937683105 | 1  |
| MSTRG. 14177. 1  | 17   | 0. 4132  | 12. 00848389 | 1  |
| MSTRG. 14182. 3  | 236  | 0. 48367 | 8. 69732666  | 1  |
| MSTRG. 14183. 4  | 336  | 0. 37723 | 8. 610656738 | 1  |
| MSTRG. 14183. 6  | 319  | 0. 35712 | 8. 143737793 | 1  |
| MSTRG. 14183. 7  | 336  | 0. 35371 | 8. 610656738 | 1  |
| MSTRG. 14183. 5  | 336  | 0. 40512 | 8. 610656738 | 1  |
| MSTRG. 14183. 1  | 535  | 0. 4414  | 8. 543762207 | 1  |
| MSTRG. 14183. 8  | 515  | 0. 43865 | 8. 547546387 | 1  |
| MSTRG. 14186. 2  | 270  | 0. 41662 | 6. 116271973 | 1  |
| MSTRG. 14190. 2  | 895  | 0. 40611 | 5. 68951416  | 1  |
| MSTRG. 14191. 1  | 52   | 0. 39805 | 4. 911193848 | 1  |
| MSTRG. 14192. 1  | 31   | 0. 42788 | 10. 15118408 | -1 |
| MSTRG. 14193. 1  | 374  | 0. 37257 | 7. 183532715 | 1  |
| MSTRG. 14193. 2  | 158  | 0. 29524 | 5. 890808105 | 1  |
| MSTRG. 14193. 3  | 630  | 0. 34804 | 7. 859191895 | 1  |
| MSTRG. 14194. 3  | 191  | 0. 44962 | 3. 960266113 | 1  |
| MSTRG. 14194. 2  | 191  | 0. 42973 | 3. 960266113 | 1  |
| MSTRG. 14189. 2  | 1109 | 0. 44042 | 5. 858337402 | 1  |
| MSTRG. 14189. 3  | 1165 | 0. 44065 | 6. 042663574 | 1  |
| MSTRG. 14198. 1  | 116  | 0. 28683 | 9. 726745605 | 1  |
| MSTRG. 14198. 2  | 73   | 0. 34787 | 6. 535827637 | 1  |
| MSTRG. 14198. 3  | 64   | 0. 28567 | 8. 843322754 | 1  |
| MSTRG. 14198. 4  | 73   | 0. 30429 | 6. 535827637 | 1  |
| MSTRG. 14198. 5  | 95   | 0. 31745 | 8. 684020996 | 1  |
| MSTRG. 14199. 3  | 104  | 0. 4374  | 5. 125793457 | 1  |
| MSTRG. 14201. 4  | 245  | 0. 44216 | 8. 858947754 | 1  |
| MSTRG. 14201. 5  | 406  | 0. 45061 | 9. 378845215 | -1 |

|                  |      |          |              |    |
|------------------|------|----------|--------------|----|
| MSTRG. 14201. 3  | 416  | 0. 4145  | 9. 278381348 | 1  |
| MSTRG. 14201. 8  | 329  | 0. 44876 | 6. 461730957 | 1  |
| MSTRG. 14201. 7  | 353  | 0. 2906  | 6. 91986084  | 1  |
| MSTRG. 14213. 1  | 37   | 0. 31989 | 9. 383972168 | 1  |
| MSTRG. 14219. 1  | 99   | 0. 29927 | 7. 548034668 | 1  |
| MSTRG. 14220. 2  | 260  | 0. 32237 | 6. 480407715 | 1  |
| MSTRG. 14223. 1  | 147  | 0. 32599 | 8. 402526855 | 1  |
| MSTRG. 14227. 1  | 30   | 0. 43543 | 10. 05230713 | 1  |
| MSTRG. 14221. 1  | 301  | 0. 4282  | 7. 762145996 | 1  |
| MSTRG. 14221. 2  | 320  | 0. 40669 | 8. 884216309 | 1  |
| MSTRG. 14221. 3  | 305  | 0. 39715 | 8. 681945801 | -1 |
| MSTRG. 14233. 2  | 38   | 0. 27089 | 11. 82391357 | 1  |
| MSTRG. 14233. 3  | 38   | 0. 3077  | 11. 82391357 | 1  |
| MSTRG. 14233. 1  | 120  | 0. 34755 | 9. 797668457 | 1  |
| MSTRG. 14233. 4  | 38   | 0. 3363  | 11. 82391357 | 1  |
| MSTRG. 14235. 1  | 48   | 0. 39187 | 6. 20904541  | 1  |
| MSTRG. 14251. 3  | 108  | 0. 35783 | 11. 83673096 | 1  |
| MSTRG. 14251. 4  | 183  | 0. 28662 | 10. 60968018 | 1  |
| MSTRG. 14251. 5  | 55   | 0. 34519 | 10. 29986572 | 1  |
| MSTRG. 14257. 1  | 178  | 0. 29772 | 10. 22735596 | 1  |
| MSTRG. 14249. 6  | 206  | 0. 44151 | 5. 96697998  | 1  |
| MSTRG. 14249. 7  | 204  | 0. 39341 | 5. 784484863 | 1  |
| MSTRG. 14249. 5  | 207  | 0. 42803 | 5. 792175293 | 1  |
| MSTRG. 14249. 8  | 198  | 0. 37039 | 5. 613830566 | 1  |
| MSTRG. 14248. 2  | 143  | 0. 32395 | 5. 192810059 | 1  |
| MSTRG. 14266. 3  | 1090 | 0. 47549 | 5. 629699707 | 1  |
| MSTRG. 14269. 2  | 170  | 0. 39126 | 5. 948547363 | 1  |
| MSTRG. 14269. 4  | 111  | 0. 30664 | 6. 478942871 | 1  |
| MSTRG. 14272. 2  | 817  | 0. 48244 | 9. 09161377  | 1  |
| MSTRG. 14277. 1  | 67   | 0. 29395 | 6. 809265137 | 1  |
| MSTRG. 14278. 1  | 102  | 0. 3136  | 6. 378723145 | -1 |
| MSTRG. 14287. 6  | 1319 | 0. 41368 | 5. 697570801 | 1  |
| MSTRG. 14287. 7  | 1329 | 0. 41984 | 5. 635437012 | 1  |
| MSTRG. 14287. 8  | 1300 | 0. 42754 | 5. 628601074 | 1  |
| MSTRG. 14287. 10 | 1300 | 0. 43379 | 5. 628601074 | 1  |
| MSTRG. 14287. 11 | 1328 | 0. 45989 | 5. 570251465 | 1  |
| MSTRG. 14287. 12 | 1300 | 0. 43298 | 5. 628601074 | 1  |
| MSTRG. 14287. 9  | 1300 | 0. 44321 | 5. 628601074 | 1  |
| MSTRG. 14287. 13 | 1328 | 0. 46297 | 5. 570251465 | 1  |
| MSTRG. 14288. 1  | 110  | 0. 35868 | 5. 471252441 | 1  |
| MSTRG. 14287. 14 | 595  | 0. 4106  | 5. 25201416  | 1  |
| MSTRG. 14280. 1  | 138  | 0. 37278 | 5. 573547363 | 1  |
| MSTRG. 14281. 1  | 53   | 0. 37391 | 7. 815612793 | 1  |
| MSTRG. 14281. 3  | 116  | 0. 35059 | 9. 515075684 | 1  |
| MSTRG. 14281. 4  | 53   | 0. 33128 | 7. 815612793 | 1  |
| MSTRG. 14281. 5  | 72   | 0. 32181 | 6. 476989746 | 1  |
| MSTRG. 14282. 1  | 97   | 0. 28883 | 6. 802062988 | 1  |
| MSTRG. 14282. 2  | 70   | 0. 29187 | 5. 114440918 | 1  |
| MSTRG. 14283. 1  | 92   | 0. 29374 | 9. 624450684 | 1  |
| MSTRG. 14284. 1  | 64   | 0. 29526 | 8. 462219238 | 1  |
| MSTRG. 14285. 1  | 83   | 0. 30387 | 7. 755432129 | 1  |
| MSTRG. 14290. 1  | 258  | 0. 29835 | 8. 847839355 | 1  |
| MSTRG. 14290. 4  | 112  | 0. 30387 | 9. 380554199 | 1  |
| MSTRG. 14290. 5  | 336  | 0. 33054 | 8. 596984863 | 1  |

|                  |      |          |              |    |
|------------------|------|----------|--------------|----|
| MSTRG. 14290. 6  | 427  | 0. 32654 | 8. 848327637 | 1  |
| MSTRG. 14290. 3  | 336  | 0. 33054 | 8. 596984863 | 1  |
| MSTRG. 14290. 7  | 336  | 0. 33754 | 8. 596984863 | 1  |
| MSTRG. 14291. 1  | 69   | 0. 43263 | 5. 480529785 | 1  |
| MSTRG. 14304. 1  | 28   | 0. 43878 | 9. 77911377  | 1  |
| MSTRG. 14304. 2  | 98   | 0. 3978  | 6. 81842041  | 1  |
| MSTRG. 14308. 1  | 171  | 0. 3363  | 11. 246521   | 1  |
| MSTRG. 14295. 1  | 77   | 0. 29607 | 8. 538757324 | -1 |
| MSTRG. 14296. 2  | 756  | 0. 47328 | 4. 279724121 | 1  |
| MSTRG. 14297. 1  | 90   | 0. 45559 | 5. 424255371 | -1 |
| MSTRG. 14298. 1  | 22   | 0. 40733 | 11. 00030518 | 1  |
| MSTRG. 14310. 2  | 180  | 0. 44808 | 4. 992004395 | 1  |
| MSTRG. 14311. 1  | 83   | 0. 29367 | 10. 71075439 | 1  |
| MSTRG. 14311. 2  | 82   | 0. 37644 | 10. 71075439 | 1  |
| MSTRG. 14311. 3  | 83   | 0. 31596 | 10. 71075439 | 1  |
| MSTRG. 14311. 4  | 82   | 0. 28726 | 10. 71075439 | 1  |
| MSTRG. 14313. 2  | 118  | 0. 30082 | 7. 735778809 | 1  |
| MSTRG. 14317. 2  | 119  | 0. 36158 | 9. 56060791  | 1  |
| MSTRG. 14318. 2  | 89   | 0. 3245  | 6. 714050293 | 1  |
| MSTRG. 14319. 1  | 1413 | 0. 42337 | 5. 525085449 | -1 |
| MSTRG. 14319. 2  | 1448 | 0. 40942 | 5. 38494873  | 1  |
| MSTRG. 14319. 4  | 1435 | 0. 4181  | 5. 452697754 | -1 |
| MSTRG. 14319. 3  | 1573 | 0. 40942 | 5. 550964355 | 1  |
| MSTRG. 14319. 12 | 1398 | 0. 41234 | 5. 449523926 | -1 |
| MSTRG. 14319. 13 | 687  | 0. 45957 | 4. 41973877  | 1  |
| MSTRG. 14319. 14 | 638  | 0. 42158 | 4. 44354248  | -1 |
| MSTRG. 14320. 1  | 113  | 0. 40128 | 7. 768371582 | 1  |
| MSTRG. 14324. 1  | 121  | 0. 28883 | 6. 558776855 | 1  |
| MSTRG. 14325. 1  | 497  | 0. 39979 | 9. 671691895 | 1  |
| MSTRG. 14325. 2  | 372  | 0. 45535 | 9. 825866699 | 1  |
| MSTRG. 14326. 1  | 11   | 0. 3151  | 3. 929626465 | 1  |
| MSTRG. 14330. 1  | 32   | 0. 36698 | 4. 36907959  | 1  |
| MSTRG. 14331. 1  | 829  | 0. 33098 | 8. 649597168 | 1  |
| MSTRG. 14331. 3  | 391  | 0. 32203 | 9. 04473877  | 1  |
| MSTRG. 14334. 2  | 321  | 0. 372   | 5. 96661377  | 1  |
| MSTRG. 14349. 2  | 263  | 0. 42904 | 9. 316467285 | 1  |
| MSTRG. 14350. 1  | 209  | 0. 37526 | 6. 693908691 | 1  |
| MSTRG. 14354. 1  | 105  | 0. 28963 | 6. 809631348 | 1  |
| MSTRG. 14343. 1  | 103  | 0. 43519 | 11. 59503174 | 1  |
| MSTRG. 14359. 2  | 764  | 0. 47055 | 4. 871398926 | 1  |
| MSTRG. 14360. 2  | 358  | 0. 45837 | 9. 25958252  | 1  |
| MSTRG. 14367. 4  | 435  | 0. 44085 | 6. 146179199 | 1  |
| MSTRG. 14367. 5  | 435  | 0. 42909 | 6. 146179199 | 1  |
| MSTRG. 14368. 1  | 27   | 0. 39388 | 9. 129211426 | 1  |
| MSTRG. 14369. 1  | 128  | 0. 27433 | 10. 08673096 | 1  |
| MSTRG. 14401. 1  | 34   | 0. 29668 | 6. 493225098 | 1  |
| MSTRG. 14409. 7  | 6895 | 0. 46754 | 5. 199768066 | 1  |
| MSTRG. 14409. 8  | 6869 | 0. 46754 | 5. 19354248  | 1  |
| MSTRG. 14409. 9  | 6895 | 0. 46534 | 5. 199768066 | 1  |
| MSTRG. 14409. 10 | 62   | 0. 35576 | 10. 29498291 | 1  |
| MSTRG. 14409. 11 | 5897 | 0. 46754 | 5. 166687012 | 1  |
| MSTRG. 14409. 12 | 5423 | 0. 47486 | 5. 146789551 | 1  |
| MSTRG. 14409. 13 | 4479 | 0. 4671  | 5. 119567871 | 1  |
| MSTRG. 14409. 14 | 4478 | 0. 4671  | 5. 119567871 | 1  |

|                 |      |          |              |    |
|-----------------|------|----------|--------------|----|
| MSTRG. 14411. 3 | 587  | 0. 43603 | 7. 590393066 | 1  |
| MSTRG. 14411. 4 | 593  | 0. 43603 | 7. 589050293 | 1  |
| MSTRG. 14411. 5 | 587  | 0. 43997 | 7. 590393066 | 1  |
| MSTRG. 14411. 6 | 593  | 0. 43603 | 7. 589050293 | 1  |
| MSTRG. 14412. 1 | 909  | 0. 43818 | 6. 647155762 | 1  |
| MSTRG. 14376. 1 | 644  | 0. 43328 | 5. 594543457 | 1  |
| MSTRG. 14376. 2 | 713  | 0. 33263 | 5. 965637207 | 1  |
| MSTRG. 14379. 1 | 45   | 0. 37257 | 9. 183898926 | 1  |
| MSTRG. 14376. 3 | 25   | 0. 41095 | 5. 426086426 | 1  |
| MSTRG. 14379. 2 | 61   | 0. 32704 | 12. 24310303 | 1  |
| MSTRG. 14380. 1 | 598  | 0. 42576 | 6. 06439209  | -1 |
| MSTRG. 14380. 2 | 278  | 0. 43205 | 8. 526794434 | 1  |
| MSTRG. 14371. 4 | 288  | 0. 43745 | 9. 639709473 | 1  |
| MSTRG. 14385. 1 | 35   | 0. 39038 | 10. 45001221 | 1  |
| MSTRG. 14386. 1 | 43   | 0. 41011 | 10. 25604248 | -1 |
| MSTRG. 14387. 1 | 34   | 0. 40862 | 4. 895812988 | 1  |
| MSTRG. 14395. 1 | 144  | 0. 31444 | 10. 15386963 | 1  |
| MSTRG. 14398. 1 | 280  | 0. 37112 | 6. 405212402 | 1  |
| MSTRG. 14399. 1 | 188  | 0. 29202 | 10. 15655518 | 1  |
| MSTRG. 14419. 1 | 91   | 0. 29059 | 4. 716003418 | 1  |
| MSTRG. 14421. 1 | 118  | 0. 40847 | 9. 729064941 | -1 |
| MSTRG. 14422. 1 | 119  | 0. 36928 | 10. 11724854 | -1 |
| MSTRG. 14424. 1 | 65   | 0. 38051 | 9. 840026855 | 1  |
| MSTRG. 14424. 2 | 103  | 0. 2886  | 9. 067443848 | 1  |
| MSTRG. 14426. 2 | 37   | 0. 3346  | 9. 497009277 | 1  |
| MSTRG. 14426. 3 | 44   | 0. 33175 | 6. 504943848 | 1  |
| MSTRG. 14427. 3 | 641  | 0. 4392  | 5. 895324707 | 1  |
| MSTRG. 14427. 4 | 675  | 0. 45147 | 5. 769470215 | 1  |
| MSTRG. 14428. 1 | 132  | 0. 3     | 10. 31768799 | -1 |
| MSTRG. 14429. 1 | 215  | 0. 37353 | 9. 950134277 | 1  |
| MSTRG. 14414. 1 | 94   | 0. 28432 | 8. 654602051 | 1  |
| MSTRG. 14434. 1 | 1359 | 0. 43646 | 8. 43939209  | 1  |
| MSTRG. 14435. 1 | 198  | 0. 41321 | 5. 938781738 | 1  |
| MSTRG. 14436. 2 | 58   | 0. 41659 | 12. 55194092 | 1  |
| MSTRG. 14437. 1 | 232  | 0. 43047 | 9. 36517334  | 1  |
| MSTRG. 14436. 4 | 354  | 0. 44789 | 5. 899475098 | 1  |
| MSTRG. 14437. 5 | 232  | 0. 35992 | 9. 36517334  | 1  |
| MSTRG. 14439. 2 | 319  | 0. 39432 | 9. 428039551 | 1  |
| MSTRG. 14439. 3 | 319  | 0. 3721  | 9. 428039551 | 1  |
| MSTRG. 14454. 3 | 2092 | 0. 4762  | 5. 559997559 | -1 |
| MSTRG. 14455. 1 | 350  | 0. 33787 | 5. 610534668 | 1  |
| MSTRG. 14461. 1 | 50   | 0. 33732 | 9. 558166504 | 1  |
| MSTRG. 14440. 1 | 37   | 0. 425   | 5. 004699707 | 1  |
| MSTRG. 14441. 2 | 338  | 0. 31105 | 8. 119445801 | 1  |
| MSTRG. 14442. 1 | 892  | 0. 4325  | 5. 24822998  | 1  |
| MSTRG. 14442. 3 | 867  | 0. 41941 | 5. 446105957 | 1  |
| MSTRG. 14442. 4 | 827  | 0. 43336 | 5. 36541748  | 1  |
| MSTRG. 14442. 5 | 872  | 0. 41941 | 5. 35345459  | 1  |
| MSTRG. 14442. 6 | 822  | 0. 44359 | 5. 465759277 | 1  |
| MSTRG. 14445. 2 | 20   | 0. 34164 | 11. 39801025 | -1 |
| MSTRG. 14445. 1 | 44   | 0. 39506 | 6. 235534668 | 1  |
| MSTRG. 14445. 3 | 42   | 0. 34566 | 9. 002990723 | 1  |
| MSTRG. 14446. 1 | 38   | 0. 36993 | 8. 017883301 | 1  |
| MSTRG. 14447. 1 | 946  | 0. 37405 | 5. 452575684 | 1  |



|                  |      |          |              |    |
|------------------|------|----------|--------------|----|
| MSTRG. 14448. 1  | 115  | 0. 34952 | 6. 045227051 | 1  |
| MSTRG. 14453. 2  | 557  | 0. 41589 | 9. 297424316 | 1  |
| MSTRG. 14453. 4  | 557  | 0. 39491 | 9. 297424316 | 1  |
| MSTRG. 14453. 5  | 334  | 0. 41285 | 9. 237609863 | 1  |
| MSTRG. 14486. 1  | 189  | 0. 32663 | 8. 03302002  | 1  |
| MSTRG. 14486. 3  | 189  | 0. 34973 | 8. 03302002  | 1  |
| MSTRG. 14486. 4  | 189  | 0. 32663 | 8. 03302002  | 1  |
| MSTRG. 14487. 1  | 698  | 0. 32514 | 10. 70281982 | 1  |
| MSTRG. 14487. 2  | 698  | 0. 32514 | 10. 70281982 | 1  |
| MSTRG. 14488. 3  | 102  | 0. 28167 | 10. 09527588 | 1  |
| MSTRG. 14488. 5  | 300  | 0. 28429 | 5. 078063965 | 1  |
| MSTRG. 14491. 3  | 272  | 0. 4593  | 11. 58526611 | 1  |
| MSTRG. 14491. 5  | 145  | 0. 29415 | 12. 11505127 | 1  |
| MSTRG. 14491. 8  | 145  | 0. 29415 | 12. 11505127 | 1  |
| MSTRG. 14491. 7  | 272  | 0. 35608 | 11. 58526611 | 1  |
| MSTRG. 14491. 10 | 272  | 0. 29919 | 11. 58526611 | 1  |
| MSTRG. 14491. 6  | 272  | 0. 29202 | 11. 58526611 | 1  |
| MSTRG. 14491. 4  | 272  | 0. 41232 | 11. 58526611 | 1  |
| MSTRG. 14491. 11 | 272  | 0. 44188 | 11. 58526611 | 1  |
| MSTRG. 14489. 1  | 370  | 0. 40705 | 8. 31463623  | 1  |
| MSTRG. 14489. 3  | 369  | 0. 38209 | 8. 31463623  | 1  |
| MSTRG. 14489. 4  | 370  | 0. 33293 | 8. 31463623  | 1  |
| MSTRG. 14492. 2  | 90   | 0. 30475 | 7. 81854248  | 1  |
| MSTRG. 14492. 3  | 114  | 0. 30191 | 7. 64276123  | 1  |
| MSTRG. 14492. 4  | 59   | 0. 34079 | 6. 22833252  | 1  |
| MSTRG. 14493. 1  | 126  | 0. 28695 | 5. 342102051 | 1  |
| MSTRG. 14492. 6  | 67   | 0. 33151 | 6. 258361816 | 1  |
| MSTRG. 14492. 5  | 108  | 0. 31292 | 9. 038635254 | 1  |
| MSTRG. 14495. 1  | 523  | 0. 37229 | 6. 460144043 | 1  |
| MSTRG. 14508. 5  | 82   | 0. 2951  | 10. 38397217 | 1  |
| MSTRG. 14508. 7  | 405  | 0. 39459 | 7. 276672363 | 1  |
| MSTRG. 14508. 8  | 1445 | 0. 46083 | 6. 612976074 | 1  |
| MSTRG. 14508. 4  | 789  | 0. 38829 | 6. 61151123  | 1  |
| MSTRG. 14508. 6  | 1201 | 0. 37395 | 6. 309753418 | 1  |
| MSTRG. 14508. 9  | 614  | 0. 39649 | 6. 445007324 | 1  |
| MSTRG. 14509. 1  | 112  | 0. 33836 | 9. 051696777 | 1  |
| MSTRG. 14508. 10 | 531  | 0. 33778 | 8. 272277832 | 1  |
| MSTRG. 14513. 1  | 67   | 0. 32072 | 8. 769470215 | 1  |
| MSTRG. 14512. 3  | 1784 | 0. 37779 | 8. 515686035 | 1  |
| MSTRG. 14512. 4  | 1784 | 0. 41348 | 8. 515686035 | 1  |
| MSTRG. 14515. 1  | 99   | 0. 29583 | 9. 032287598 | 1  |
| MSTRG. 14515. 2  | 35   | 0. 3892  | 9. 77911377  | 1  |
| MSTRG. 14515. 3  | 83   | 0. 30576 | 8. 502868652 | 1  |
| MSTRG. 14516. 1  | 68   | 0. 39144 | 11. 70526123 | -1 |
| MSTRG. 14528. 1  | 183  | 0. 28982 | 10. 70281982 | 1  |
| MSTRG. 14528. 3  | 88   | 0. 32167 | 7. 844177246 | 1  |
| MSTRG. 14528. 5  | 65   | 0. 37955 | 8. 064147949 | 1  |
| MSTRG. 14529. 1  | 134  | 0. 29772 | 9. 968078613 | 1  |
| MSTRG. 14529. 2  | 98   | 0. 28584 | 9. 130310059 | 1  |
| MSTRG. 14530. 1  | 123  | 0. 29772 | 9. 03704834  | 1  |
| MSTRG. 14529. 3  | 163  | 0. 29367 | 7. 904968262 | 1  |
| MSTRG. 14529. 4  | 69   | 0. 3327  | 7. 77947998  | 1  |
| MSTRG. 14529. 5  | 56   | 0. 26113 | 6. 694641113 | 1  |
| MSTRG. 14531. 1  | 183  | 0. 28584 | 10. 60235596 | 1  |

|                 |      |         |             |    |
|-----------------|------|---------|-------------|----|
| MSTRG. 14531.2  | 48   | 0.37017 | 9.489562988 | 1  |
| MSTRG. 14533.1  | 62   | 0.30608 | 7.799987793 | 1  |
| MSTRG. 14534.1  | 187  | 0.29772 | 8.984924316 | 1  |
| MSTRG. 14534.2  | 114  | 0.29551 | 10.29095459 | 1  |
| MSTRG. 14534.3  | 87   | 0.32086 | 9.41595459  | 1  |
| MSTRG. 14534.4  | 104  | 0.28927 | 8.319519043 | 1  |
| MSTRG. 14533.2  | 103  | 0.29793 | 4.972106934 | 1  |
| MSTRG. 14535.1  | 73   | 0.43625 | 9.695007324 | 1  |
| MSTRG. 14517.3  | 347  | 0.3299  | 6.115661621 | 1  |
| MSTRG. 14517.4  | 209  | 0.27075 | 5.594177246 | 1  |
| MSTRG. 14518.1  | 197  | 0.38567 | 11.00958252 | 1  |
| MSTRG. 14519.1  | 44   | 0.3508  | 6.956604004 | 1  |
| MSTRG. 14526.3  | 777  | 0.37963 | 7.300598145 | 1  |
| MSTRG. 14536.1  | 72   | 0.37156 | 8.051330566 | 1  |
| MSTRG. 14538.2  | 208  | 0.28165 | 9.615783691 | 1  |
| MSTRG. 14538.3  | 72   | 0.37225 | 9.564025879 | 1  |
| MSTRG. 14538.4  | 300  | 0.25289 | 9.059387207 | 1  |
| MSTRG. 14538.5  | 89   | 0.28266 | 7.954406738 | 1  |
| MSTRG. 14539.5  | 468  | 0.45105 | 5.17376709  | 1  |
| MSTRG. 14539.7  | 474  | 0.48477 | 5.17376709  | 1  |
| MSTRG. 14540.1  | 518  | 0.40314 | 8.576965332 | 1  |
| MSTRG. 14540.11 | 457  | 0.40736 | 7.093566895 | 1  |
| MSTRG. 14540.9  | 509  | 0.3223  | 6.808532715 | 1  |
| MSTRG. 14540.12 | 642  | 0.45605 | 8.633728027 | 1  |
| MSTRG. 14540.13 | 593  | 0.4514  | 8.646911621 | 1  |
| MSTRG. 14540.10 | 593  | 0.41836 | 8.646911621 | 1  |
| MSTRG. 14540.4  | 642  | 0.44681 | 8.633728027 | 1  |
| MSTRG. 14540.3  | 593  | 0.43141 | 8.646911621 | 1  |
| MSTRG. 14540.6  | 593  | 0.43141 | 8.646911621 | 1  |
| MSTRG. 14540.7  | 370  | 0.36594 | 9.276062012 | 1  |
| MSTRG. 14540.2  | 642  | 0.40129 | 8.633728027 | 1  |
| MSTRG. 14540.8  | 642  | 0.40129 | 8.633728027 | 1  |
| MSTRG. 14540.14 | 226  | 0.29351 | 10.04022217 | 1  |
| MSTRG. 14541.1  | 64   | 0.33383 | 5.472595215 | 1  |
| MSTRG. 14543.5  | 1017 | 0.48309 | 8.936828613 | 1  |
| MSTRG. 14544.1  | 657  | 0.46087 | 6.098449707 | 1  |
| MSTRG. 14553.1  | 353  | 0.35412 | 4.861999512 | 1  |
| MSTRG. 14553.2  | 1102 | 0.41299 | 9.367248535 | 1  |
| MSTRG. 14553.3  | 353  | 0.33623 | 4.861999512 | 1  |
| MSTRG. 14558.2  | 351  | 0.43708 | 5.338317871 | 1  |
| MSTRG. 14560.3  | 338  | 0.41724 | 5.950012207 | 1  |
| MSTRG. 14560.7  | 79   | 0.32442 | 8.68560791  | 1  |
| MSTRG. 14563.6  | 428  | 0.31765 | 5.051330566 | 1  |
| MSTRG. 14563.4  | 428  | 0.35176 | 5.051330566 | 1  |
| MSTRG. 14563.5  | 428  | 0.35176 | 5.051330566 | 1  |
| MSTRG. 14564.6  | 95   | 0.32154 | 8.757751465 | 1  |
| MSTRG. 14564.4  | 518  | 0.44689 | 8.990539551 | 1  |
| MSTRG. 14564.5  | 374  | 0.42034 | 9.032409668 | 1  |
| MSTRG. 14564.2  | 407  | 0.43046 | 8.667297363 | 1  |
| MSTRG. 14565.1  | 457  | 0.46022 | 7.564880371 | 1  |
| MSTRG. 14564.7  | 53   | 0.39087 | 6.699035645 | -1 |
| MSTRG. 14564.8  | 407  | 0.43126 | 8.804870605 | 1  |
| MSTRG. 14565.2  | 537  | 0.47981 | 8.285583496 | 1  |
| MSTRG. 14566.4  | 141  | 0.30483 | 5.777893066 | 1  |

|                  |      |          |              |   |
|------------------|------|----------|--------------|---|
| MSTRG. 14567. 1  | 139  | 0. 29615 | 9. 891296387 | 1 |
| MSTRG. 14568. 1  | 195  | 0. 37617 | 9. 049377441 | 1 |
| MSTRG. 14569. 1  | 73   | 0. 34716 | 11. 39654541 | 1 |
| MSTRG. 14556. 2  | 116  | 0. 36453 | 6. 579040527 | 1 |
| MSTRG. 14557. 1  | 1934 | 0. 37898 | 5. 627258301 | 1 |
| MSTRG. 14574. 4  | 764  | 0. 32598 | 8. 366027832 | 1 |
| MSTRG. 14576. 2  | 109  | 0. 40671 | 9. 154846191 | 1 |
| MSTRG. 14579. 4  | 2094 | 0. 45421 | 6. 060974121 | 1 |
| MSTRG. 14580. 1  | 449  | 0. 44832 | 9. 01739502  | 1 |
| MSTRG. 14580. 3  | 270  | 0. 44094 | 9. 135925293 | 1 |
| MSTRG. 14570. 2  | 316  | 0. 44679 | 8. 881286621 | 1 |
| MSTRG. 14573. 2  | 47   | 0. 33595 | 9. 765319824 | 1 |
| MSTRG. 14583. 1  | 163  | 0. 35927 | 9. 296936035 | 1 |
| MSTRG. 14593. 1  | 276  | 0. 45722 | 5. 412414551 | 1 |
| MSTRG. 14593. 3  | 540  | 0. 44434 | 6. 153503418 | 1 |
| MSTRG. 14593. 4  | 546  | 0. 40057 | 6. 195129395 | 1 |
| MSTRG. 14593. 5  | 348  | 0. 27251 | 8. 386535645 | 1 |
| MSTRG. 14593. 7  | 195  | 0. 27251 | 4. 644714355 | 1 |
| MSTRG. 14600. 1  | 215  | 0. 37269 | 5. 731018066 | 1 |
| MSTRG. 14600. 8  | 215  | 0. 36029 | 5. 709289551 | 1 |
| MSTRG. 14600. 11 | 1021 | 0. 42238 | 8. 920837402 | 1 |
| MSTRG. 14600. 5  | 1066 | 0. 43199 | 9. 210144043 | 1 |
| MSTRG. 14600. 6  | 901  | 0. 40698 | 8. 996643066 | 1 |
| MSTRG. 14600. 7  | 1034 | 0. 4199  | 9. 087097168 | 1 |
| MSTRG. 14600. 2  | 1067 | 0. 43199 | 9. 210144043 | 1 |
| MSTRG. 14600. 3  | 1033 | 0. 4199  | 9. 087097168 | 1 |
| MSTRG. 14600. 9  | 934  | 0. 4045  | 9. 151062012 | 1 |
| MSTRG. 14600. 12 | 627  | 0. 33828 | 9. 682067871 | 1 |
| MSTRG. 14601. 1  | 55   | 0. 36036 | 6. 12689209  | 1 |
| MSTRG. 14600. 13 | 75   | 0. 28936 | 10. 06011963 | 1 |
| MSTRG. 14600. 14 | 75   | 0. 30897 | 10. 06011963 | 1 |
| MSTRG. 14603. 2  | 255  | 0. 3346  | 7. 540710449 | 1 |
| MSTRG. 14605. 3  | 102  | 0. 32831 | 7. 65423584  | 1 |
| MSTRG. 14605. 4  | 131  | 0. 31912 | 8. 844665527 | 1 |
| MSTRG. 14605. 2  | 116  | 0. 41138 | 9. 768127441 | 1 |
| MSTRG. 14605. 5  | 79   | 0. 27075 | 5. 992614746 | 1 |
| MSTRG. 14591. 4  | 350  | 0. 32649 | 8. 91595459  | 1 |
| MSTRG. 14591. 5  | 375  | 0. 3473  | 8. 593566895 | 1 |
| MSTRG. 14589. 1  | 42   | 0. 37774 | 6. 700744629 | 1 |
| MSTRG. 14590. 1  | 78   | 0. 43501 | 6. 720397949 | 1 |
| MSTRG. 14592. 1  | 433  | 0. 43753 | 8. 269470215 | 1 |
| MSTRG. 14592. 2  | 476  | 0. 43793 | 8. 424377441 | 1 |
| MSTRG. 14608. 1  | 423  | 0. 28085 | 5. 616149902 | 1 |
| MSTRG. 14608. 2  | 423  | 0. 28085 | 5. 616149902 | 1 |
| MSTRG. 14608. 5  | 423  | 0. 32165 | 5. 616149902 | 1 |
| MSTRG. 14608. 4  | 423  | 0. 29456 | 5. 616149902 | 1 |
| MSTRG. 14610. 1  | 86   | 0. 31734 | 8. 930969238 | 1 |
| MSTRG. 14608. 7  | 158  | 0. 28085 | 8. 467956543 | 1 |
| MSTRG. 14612. 1  | 85   | 0. 32412 | 6. 034240723 | 1 |
| MSTRG. 14615. 1  | 318  | 0. 28443 | 8. 792663574 | 1 |
| MSTRG. 14615. 2  | 318  | 0. 28718 | 8. 792663574 | 1 |
| MSTRG. 14615. 3  | 216  | 0. 32038 | 8. 480773926 | 1 |
| MSTRG. 14615. 5  | 318  | 0. 28718 | 8. 792663574 | 1 |
| MSTRG. 14619. 3  | 787  | 0. 39515 | 9. 774230957 | 1 |

|                 |      |          |              |    |
|-----------------|------|----------|--------------|----|
| MSTRG. 14619. 2 | 752  | 0. 41772 | 9. 328063965 | 1  |
| MSTRG. 14619. 4 | 787  | 0. 39515 | 9. 774230957 | 1  |
| MSTRG. 14620. 1 | 216  | 0. 46878 | 8. 335998535 | 1  |
| MSTRG. 14620. 2 | 216  | 0. 46108 | 8. 335998535 | 1  |
| MSTRG. 14620. 3 | 161  | 0. 40196 | 6. 722473145 | 1  |
| MSTRG. 14620. 4 | 216  | 0. 449   | 8. 335998535 | 1  |
| MSTRG. 14620. 5 | 68   | 0. 35004 | 8. 058044434 | 1  |
| MSTRG. 14620. 6 | 161  | 0. 48509 | 6. 722473145 | 1  |
| MSTRG. 14616. 3 | 326  | 0. 3072  | 4. 663635254 | 1  |
| MSTRG. 14624. 4 | 492  | 0. 42886 | 6. 963928223 | 1  |
| MSTRG. 14625. 3 | 338  | 0. 43771 | 5. 425598145 | 1  |
| MSTRG. 14629. 1 | 536  | 0. 40635 | 9. 524841309 | 1  |
| MSTRG. 14629. 3 | 461  | 0. 46924 | 9. 602722168 | 1  |
| MSTRG. 14626. 2 | 461  | 0. 46789 | 6. 415100098 | 1  |
| MSTRG. 14630. 1 | 69   | 0. 34022 | 9. 301452637 | 1  |
| MSTRG. 14633. 1 | 47   | 0. 3381  | 10. 79400635 | 1  |
| MSTRG. 14638. 1 | 29   | 0. 40424 | 7. 99798584  | 1  |
| MSTRG. 14645. 1 | 1130 | 0. 47485 | 5. 998596191 | 1  |
| MSTRG. 14646. 1 | 123  | 0. 35147 | 10. 72283936 | 1  |
| MSTRG. 14648. 2 | 114  | 0. 37091 | 7. 667297363 | 1  |
| MSTRG. 14648. 3 | 612  | 0. 40777 | 7. 766662598 | 1  |
| MSTRG. 14651. 1 | 376  | 0. 47287 | 4. 39654541  | 1  |
| MSTRG. 14651. 3 | 376  | 0. 45326 | 4. 39654541  | 1  |
| MSTRG. 14651. 4 | 337  | 0. 44373 | 4. 480407715 | 1  |
| MSTRG. 14647. 1 | 25   | 0. 40418 | 10. 83441162 | 1  |
| MSTRG. 14658. 1 | 115  | 0. 35072 | 6. 002746582 | 1  |
| MSTRG. 14656. 1 | 34   | 0. 33634 | 6. 492004395 | 1  |
| MSTRG. 14672. 1 | 75   | 0. 45616 | 4. 955871582 | -1 |
| MSTRG. 14673. 1 | 26   | 0. 44576 | 10. 93133545 | 1  |
| MSTRG. 14675. 2 | 564  | 0. 31035 | 5. 906677246 | 1  |
| MSTRG. 14678. 1 | 89   | 0. 40194 | 10. 51885986 | 1  |
| MSTRG. 14686. 1 | 25   | 0. 3903  | 6. 491638184 | 1  |
| MSTRG. 14687. 1 | 55   | 0. 32919 | 10. 02618408 | 1  |
| MSTRG. 14687. 2 | 55   | 0. 31922 | 10. 02618408 | 1  |
| MSTRG. 14688. 2 | 660  | 0. 35881 | 8. 112976074 | 1  |
| MSTRG. 14692. 1 | 47   | 0. 41703 | 9. 822937012 | 1  |
| MSTRG. 14692. 2 | 78   | 0. 42221 | 11. 16168213 | 1  |
| MSTRG. 14695. 1 | 96   | 0. 40102 | 10. 18756104 | -1 |
| MSTRG. 14696. 5 | 151  | 0. 29035 | 7. 87713623  | 1  |
| MSTRG. 14696. 6 | 151  | 0. 28167 | 7. 87713623  | 1  |
| MSTRG. 14697. 1 | 120  | 0. 38693 | 8. 660217285 | 1  |
| MSTRG. 14699. 2 | 216  | 0. 27327 | 9. 605407715 | 1  |
| MSTRG. 14699. 1 | 216  | 0. 27987 | 9. 605407715 | 1  |
| MSTRG. 14699. 3 | 216  | 0. 27987 | 9. 605407715 | 1  |
| MSTRG. 14699. 4 | 216  | 0. 27987 | 9. 605407715 | 1  |
| MSTRG. 14699. 5 | 216  | 0. 27987 | 9. 605407715 | 1  |
| MSTRG. 14699. 6 | 216  | 0. 27327 | 9. 605407715 | 1  |
| MSTRG. 14701. 8 | 108  | 0. 32394 | 9. 834533691 | 1  |
| MSTRG. 14701. 4 | 539  | 0. 41803 | 5. 725402832 | 1  |
| MSTRG. 14701. 5 | 515  | 0. 41974 | 6. 245666504 | 1  |
| MSTRG. 14701. 7 | 631  | 0. 41822 | 7. 210632324 | 1  |
| MSTRG. 14701. 9 | 275  | 0. 41197 | 4. 609802246 | 1  |
| MSTRG. 14702. 1 | 1131 | 0. 41174 | 8. 382141113 | 1  |
| MSTRG. 14703. 1 | 81   | 0. 33105 | 9. 265686035 | 1  |

|                  |      |          |              |    |
|------------------|------|----------|--------------|----|
| MSTRG. 14707. 5  | 609  | 0. 42903 | 8. 300720215 | 1  |
| MSTRG. 14707. 4  | 604  | 0. 3942  | 8. 190368652 | 1  |
| MSTRG. 14707. 2  | 604  | 0. 38132 | 8. 190368652 | 1  |
| MSTRG. 14708. 2  | 1454 | 0. 33747 | 7. 290100098 | 1  |
| MSTRG. 14708. 6  | 461  | 0. 32213 | 5. 855041504 | 1  |
| MSTRG. 14708. 7  | 312  | 0. 39968 | 5. 678894043 | 1  |
| MSTRG. 14709. 1  | 248  | 0. 34437 | 8. 711730957 | -1 |
| MSTRG. 14710. 1  | 93   | 0. 30808 | 7. 997741699 | 1  |
| MSTRG. 14708. 9  | 353  | 0. 35972 | 6. 630065918 | 1  |
| MSTRG. 14711. 1  | 190  | 0. 29305 | 9. 420959473 | 1  |
| MSTRG. 14708. 10 | 305  | 0. 40309 | 7. 551940918 | 1  |
| MSTRG. 14704. 2  | 501  | 0. 45064 | 6. 410583496 | 1  |
| MSTRG. 14704. 3  | 350  | 0. 433   | 6. 057434082 | 1  |
| MSTRG. 14704. 4  | 455  | 0. 43439 | 6. 176330566 | 1  |
| MSTRG. 14706. 1  | 90   | 0. 33287 | 5. 699645996 | 1  |
| MSTRG. 14715. 1  | 458  | 0. 32598 | 7. 124450684 | 1  |
| MSTRG. 14715. 6  | 458  | 0. 44421 | 7. 124450684 | 1  |
| MSTRG. 14715. 7  | 458  | 0. 44173 | 7. 124450684 | 1  |
| MSTRG. 14715. 8  | 458  | 0. 44173 | 7. 124450684 | 1  |
| MSTRG. 14716. 1  | 73   | 0. 32431 | 10. 07489014 | 1  |
| MSTRG. 14717. 1  | 185  | 0. 27251 | 9. 039978027 | 1  |
| MSTRG. 14718. 1  | 109  | 0. 3976  | 11. 31658936 | 1  |
| MSTRG. 14719. 1  | 85   | 0. 2846  | 9. 098449707 | 1  |
| MSTRG. 14720. 1  | 99   | 0. 29223 | 9. 888977051 | 1  |
| MSTRG. 14721. 1  | 184  | 0. 2785  | 9. 948791504 | 1  |
| MSTRG. 14722. 1  | 130  | 0. 29988 | 10. 13641357 | 1  |
| MSTRG. 14723. 1  | 63   | 0. 29075 | 7. 918640137 | 1  |
| MSTRG. 14727. 1  | 50   | 0. 32592 | 9. 776062012 | 1  |
| MSTRG. 14727. 2  | 46   | 0. 35394 | 9. 74786377  | 1  |
| MSTRG. 14730. 1  | 133  | 0. 32086 | 8. 652893066 | 1  |
| MSTRG. 14731. 2  | 612  | 0. 3939  | 6. 197570801 | 1  |
| MSTRG. 14734. 2  | 367  | 0. 44277 | 4. 901550293 | 1  |
| MSTRG. 14735. 2  | 925  | 0. 45947 | 6. 050842285 | 1  |
| MSTRG. 14735. 3  | 992  | 0. 45933 | 6. 792907715 | 1  |
| MSTRG. 14736. 1  | 243  | 0. 27532 | 9. 211975098 | -1 |
| MSTRG. 14745. 1  | 117  | 0. 32466 | 9. 841125488 | 1  |
| MSTRG. 14746. 1  | 160  | 0. 27883 | 11. 32196045 | 1  |
| MSTRG. 14748. 1  | 154  | 0. 33926 | 11. 71026611 | 1  |
| MSTRG. 14749. 1  | 185  | 0. 27469 | 9. 69342041  | 1  |
| MSTRG. 14751. 1  | 92   | 0. 33952 | 9. 586242676 | 1  |
| MSTRG. 14750. 3  | 391  | 0. 47474 | 6. 676086426 | 1  |
| MSTRG. 14750. 2  | 512  | 0. 48204 | 6. 296081543 | 1  |
| MSTRG. 14750. 5  | 329  | 0. 47611 | 8. 317199707 | -1 |
| MSTRG. 14750. 4  | 450  | 0. 46506 | 7. 16217041  | -1 |
| MSTRG. 14750. 6  | 128  | 0. 41229 | 9. 784118652 | 1  |
| MSTRG. 14753. 3  | 129  | 0. 3199  | 11. 34967041 | 1  |
| MSTRG. 14754. 1  | 68   | 0. 35273 | 4. 66973877  | 1  |
| MSTRG. 14753. 4  | 134  | 0. 33768 | 9. 096496582 | 1  |
| MSTRG. 14769. 4  | 1784 | 0. 45628 | 5. 373596191 | 1  |
| MSTRG. 14771. 1  | 135  | 0. 30624 | 9. 600036621 | 1  |
| MSTRG. 14772. 1  | 265  | 0. 36218 | 8. 190734863 | 1  |
| MSTRG. 14772. 2  | 535  | 0. 45623 | 6. 659362793 | 1  |
| MSTRG. 14772. 4  | 265  | 0. 36218 | 8. 190734863 | 1  |
| MSTRG. 14773. 1  | 114  | 0. 31313 | 9. 695861816 | 1  |

|                 |      |          |              |    |
|-----------------|------|----------|--------------|----|
| MSTRG. 14773. 2 | 157  | 0. 27794 | 11. 269104   | 1  |
| MSTRG. 14775. 1 | 88   | 0. 33578 | 7. 864807129 | 1  |
| MSTRG. 14777. 1 | 75   | 0. 31092 | 10. 37701416 | 1  |
| MSTRG. 14778. 1 | 67   | 0. 39006 | 6. 969299316 | 1  |
| MSTRG. 14780. 2 | 555  | 0. 39577 | 5. 817565918 | 1  |
| MSTRG. 14780. 3 | 555  | 0. 40931 | 5. 991149902 | 1  |
| MSTRG. 14782. 6 | 188  | 0. 38868 | 5. 76373291  | 1  |
| MSTRG. 14785. 4 | 139  | 0. 32002 | 9. 293884277 | 1  |
| MSTRG. 14785. 5 | 139  | 0. 35266 | 9. 293884277 | 1  |
| MSTRG. 14787. 1 | 66   | 0. 31745 | 9. 506896973 | 1  |
| MSTRG. 14789. 4 | 1048 | 0. 45564 | 5. 992248535 | 1  |
| MSTRG. 14790. 3 | 667  | 0. 47436 | 4. 957946777 | 1  |
| MSTRG. 14790. 4 | 517  | 0. 45412 | 4. 84161377  | 1  |
| MSTRG. 14791. 2 | 49   | 0. 43347 | 8. 800964355 | 1  |
| MSTRG. 14792. 2 | 145  | 0. 43584 | 7. 793884277 | 1  |
| MSTRG. 14793. 2 | 282  | 0. 40942 | 9. 738342285 | 1  |
| MSTRG. 14796. 1 | 237  | 0. 42138 | 6. 32232666  | -1 |
| MSTRG. 14800. 1 | 314  | 0. 44915 | 6. 604919434 | 1  |
| MSTRG. 14801. 2 | 800  | 0. 41632 | 8. 214538574 | 1  |
| MSTRG. 14808. 2 | 547  | 0. 42756 | 6. 247741699 | 1  |
| MSTRG. 14808. 4 | 547  | 0. 45054 | 6. 247741699 | 1  |
| MSTRG. 14818. 2 | 878  | 0. 40198 | 9. 297302246 | 1  |
| MSTRG. 14818. 4 | 880  | 0. 38413 | 9. 297302246 | 1  |
| MSTRG. 14819. 1 | 2057 | 0. 43681 | 8. 758239746 | 1  |
| MSTRG. 14821. 2 | 261  | 0. 37402 | 7. 702087402 | 1  |
| MSTRG. 14821. 3 | 261  | 0. 37182 | 7. 702087402 | 1  |
| MSTRG. 14821. 5 | 144  | 0. 40649 | 11. 21038818 | 1  |
| MSTRG. 14814. 1 | 41   | 0. 42026 | 6. 492248535 | -1 |
| MSTRG. 14815. 3 | 588  | 0. 43691 | 6. 503234863 | 1  |
| MSTRG. 14827. 1 | 41   | 0. 3376  | 4. 944641113 | 1  |
| MSTRG. 14828. 3 | 1178 | 0. 46877 | 7. 330505371 | 1  |
| MSTRG. 14828. 4 | 1155 | 0. 47756 | 7. 151550293 | 1  |
| MSTRG. 14828. 2 | 820  | 0. 42495 | 5. 583679199 | 1  |
| MSTRG. 14828. 6 | 413  | 0. 34284 | 9. 471252441 | 1  |
| MSTRG. 14830. 5 | 527  | 0. 45414 | 5. 951965332 | 1  |
| MSTRG. 14835. 1 | 104  | 0. 2735  | 7. 77142334  | 1  |
| MSTRG. 14835. 2 | 129  | 0. 26837 | 9. 095275879 | 1  |
| MSTRG. 14834. 5 | 75   | 0. 29147 | 9. 509338379 | 1  |
| MSTRG. 14840. 1 | 290  | 0. 30191 | 6. 152282715 | 1  |
| MSTRG. 14840. 5 | 535  | 0. 47256 | 6. 528991699 | 1  |
| MSTRG. 14833. 7 | 697  | 0. 43008 | 5. 653015137 | 1  |
| MSTRG. 14833. 3 | 697  | 0. 45635 | 5. 653015137 | 1  |
| MSTRG. 14841. 1 | 248  | 0. 47332 | 8. 182067871 | 1  |
| MSTRG. 14842. 3 | 161  | 0. 42783 | 10. 01263428 | 1  |
| MSTRG. 14842. 2 | 161  | 0. 45645 | 10. 01263428 | 1  |
| MSTRG. 14842. 1 | 161  | 0. 34035 | 10. 01263428 | 1  |
| MSTRG. 14842. 5 | 161  | 0. 42766 | 10. 01263428 | 1  |
| MSTRG. 14844. 2 | 226  | 0. 40409 | 6. 044250488 | 1  |
| MSTRG. 14846. 1 | 1253 | 0. 45145 | 8. 947937012 | 1  |
| MSTRG. 14846. 3 | 1252 | 0. 45266 | 8. 947937012 | 1  |
| MSTRG. 14849. 1 | 1245 | 0. 35883 | 7. 957336426 | 1  |
| MSTRG. 14849. 2 | 1244 | 0. 43734 | 7. 957336426 | 1  |
| MSTRG. 14849. 3 | 1270 | 0. 43858 | 7. 789245605 | 1  |
| MSTRG. 14852. 1 | 143  | 0. 28167 | 8. 559509277 | 1  |

|                 |      |          |              |    |
|-----------------|------|----------|--------------|----|
| MSTRG. 14852. 2 | 210  | 0. 28788 | 9. 77935791  | 1  |
| MSTRG. 14853. 1 | 51   | 0. 46401 | 4. 593933105 | -1 |
| MSTRG. 14852. 3 | 108  | 0. 36172 | 7. 034362793 | 1  |
| MSTRG. 14854. 2 | 86   | 0. 33248 | 9. 79473877  | 1  |
| MSTRG. 14854. 1 | 86   | 0. 38081 | 9. 79473877  | 1  |
| MSTRG. 14854. 3 | 86   | 0. 35594 | 8. 928405762 | 1  |
| MSTRG. 14854. 4 | 86   | 0. 35594 | 8. 928405762 | 1  |
| MSTRG. 14854. 5 | 86   | 0. 38512 | 8. 928405762 | 1  |
| MSTRG. 14855. 1 | 140  | 0. 30894 | 9. 081848145 | 1  |
| MSTRG. 14856. 1 | 24   | 0. 34421 | 10. 7366333  | -1 |
| MSTRG. 14864. 1 | 23   | 0. 36714 | 11. 53900146 | 1  |
| MSTRG. 14866. 2 | 322  | 0. 40503 | 5. 489318848 | 1  |
| MSTRG. 14866. 3 | 322  | 0. 40561 | 5. 489318848 | 1  |
| MSTRG. 14867. 5 | 103  | 0. 31753 | 9. 514831543 | 1  |
| MSTRG. 14867. 6 | 158  | 0. 28014 | 10. 83587646 | 1  |
| MSTRG. 14865. 2 | 295  | 0. 46008 | 4. 816711426 | 1  |
| MSTRG. 14869. 2 | 1317 | 0. 46942 | 7. 009460449 | 1  |
| MSTRG. 14869. 5 | 1144 | 0. 48624 | 7. 187927246 | 1  |
| MSTRG. 14869. 1 | 1320 | 0. 40577 | 6. 909118652 | 1  |
| MSTRG. 14869. 3 | 1256 | 0. 40577 | 6. 969665527 | 1  |
| MSTRG. 14868. 1 | 400  | 0. 41691 | 8. 329284668 | 1  |
| MSTRG. 14871. 2 | 46   | 0. 31076 | 7. 714172363 | 1  |
| MSTRG. 14871. 1 | 47   | 0. 36184 | 9. 184997559 | 1  |
| MSTRG. 14871. 3 | 69   | 0. 33639 | 10. 05450439 | 1  |
| MSTRG. 14872. 2 | 302  | 0. 38263 | 5. 042175293 | 1  |
| MSTRG. 14872. 3 | 246  | 0. 32677 | 10. 24237061 | 1  |
| MSTRG. 14873. 2 | 305  | 0. 36736 | 8. 896179199 | 1  |
| MSTRG. 14873. 3 | 478  | 0. 39787 | 9. 11907959  | 1  |
| MSTRG. 14875. 1 | 32   | 0. 41337 | 4. 657043457 | 1  |
| MSTRG. 14883. 1 | 56   | 0. 32704 | 10. 45587158 | 1  |
| MSTRG. 14884. 1 | 237  | 0. 29583 | 9. 831604004 | 1  |
| MSTRG. 14885. 1 | 60   | 0. 39902 | 11. 21246338 | 1  |
| MSTRG. 14877. 1 | 46   | 0. 34696 | 9. 694030762 | 1  |
| MSTRG. 14878. 1 | 105  | 0. 35892 | 10. 96820068 | 1  |
| MSTRG. 14890. 2 | 232  | 0. 4318  | 9. 706481934 | 1  |
| MSTRG. 14892. 2 | 47   | 0. 44454 | 4. 533996582 | 1  |
| MSTRG. 14905. 1 | 410  | 0. 44429 | 8. 501525879 | 1  |
| MSTRG. 14907. 2 | 54   | 0. 33429 | 12. 30267334 | 1  |
| MSTRG. 14909. 2 | 303  | 0. 4583  | 5. 867614746 | 1  |
| MSTRG. 14909. 3 | 140  | 0. 35058 | 9. 865661621 | 1  |
| MSTRG. 14909. 4 | 76   | 0. 41239 | 10. 0479126  | 1  |
| MSTRG. 14909. 5 | 255  | 0. 47321 | 8. 981506348 | 1  |
| MSTRG. 14911. 1 | 334  | 0. 46854 | 5. 766662598 | 1  |
| MSTRG. 14913. 2 | 1239 | 0. 43408 | 5. 324035645 | 1  |
| MSTRG. 14913. 3 | 1246 | 0. 43408 | 5. 388977051 | 1  |
| MSTRG. 14921. 1 | 99   | 0. 29423 | 9. 035705566 | 1  |
| MSTRG. 14920. 2 | 344  | 0. 38675 | 9. 512878418 | 1  |
| MSTRG. 14914. 2 | 224  | 0. 36612 | 7. 750061035 | 1  |
| MSTRG. 14915. 1 | 83   | 0. 45667 | 8. 789489746 | 1  |
| MSTRG. 14915. 3 | 108  | 0. 35137 | 6. 88104248  | 1  |
| MSTRG. 14915. 4 | 83   | 0. 41438 | 8. 789489746 | 1  |
| MSTRG. 14930. 4 | 181  | 0. 40563 | 6. 059020996 | 1  |
| MSTRG. 14930. 5 | 100  | 0. 32971 | 8. 706115723 | 1  |
| MSTRG. 14930. 6 | 99   | 0. 43495 | 11. 93792725 | 1  |

|                 |      |          |              |    |
|-----------------|------|----------|--------------|----|
| MSTRG. 14931. 1 | 85   | 0. 30151 | 4. 780334473 | 1  |
| MSTRG. 14932. 1 | 59   | 0. 3279  | 7. 928894043 | 1  |
| MSTRG. 14933. 1 | 41   | 0. 40502 | 8. 554138184 | 1  |
| MSTRG. 14933. 2 | 70   | 0. 40675 | 10. 62286377 | 1  |
| MSTRG. 14939. 1 | 59   | 0. 38194 | 11. 28924561 | -1 |
| MSTRG. 14940. 2 | 637  | 0. 47587 | 9. 189147949 | 1  |
| MSTRG. 14944. 1 | 175  | 0. 35489 | 6. 911804199 | 1  |
| MSTRG. 14945. 1 | 3621 | 0. 47197 | 5. 88861084  | 1  |
| MSTRG. 14945. 5 | 3742 | 0. 46942 | 5. 852111816 | 1  |
| MSTRG. 14945. 6 | 2247 | 0. 47638 | 5. 06048584  | 1  |
| MSTRG. 14946. 1 | 80   | 0. 36337 | 7. 10345459  | 1  |
| MSTRG. 14947. 1 | 76   | 0. 26677 | 10. 01495361 | 1  |
| MSTRG. 14945. 7 | 3359 | 0. 45853 | 5. 63861084  | 1  |
| MSTRG. 14948. 1 | 58   | 0. 30862 | 10. 14398193 | 1  |
| MSTRG. 14945. 8 | 1109 | 0. 44952 | 5. 894348145 | -1 |
| MSTRG. 14945. 9 | 2326 | 0. 45864 | 5. 040466309 | 1  |
| MSTRG. 14942. 2 | 72   | 0. 33388 | 9. 957214355 | 1  |
| MSTRG. 14942. 3 | 74   | 0. 36258 | 10. 57366943 | 1  |
| MSTRG. 14942. 6 | 87   | 0. 34636 | 10. 51983643 | 1  |
| MSTRG. 14942. 5 | 269  | 0. 42166 | 9. 295227051 | 1  |
| MSTRG. 14942. 4 | 147  | 0. 27469 | 8. 225524902 | 1  |
| MSTRG. 14958. 1 | 59   | 0. 35791 | 7. 900817871 | 1  |
| MSTRG. 14957. 2 | 287  | 0. 36085 | 8. 199035645 | 1  |
| MSTRG. 14959. 1 | 311  | 0. 39407 | 9. 770202637 | 1  |
| MSTRG. 14962. 2 | 431  | 0. 37854 | 7. 148620605 | 1  |
| MSTRG. 14960. 1 | 18   | 0. 36034 | 7. 954650879 | 1  |
| MSTRG. 14965. 4 | 451  | 0. 36026 | 6. 343566895 | 1  |
| MSTRG. 14965. 3 | 1035 | 0. 41776 | 5. 164978027 | 1  |
| MSTRG. 14965. 1 | 1528 | 0. 44926 | 5. 417297363 | 1  |
| MSTRG. 14965. 2 | 1513 | 0. 45174 | 5. 318908691 | 1  |
| MSTRG. 14965. 5 | 1514 | 0. 44926 | 5. 459533691 | 1  |
| MSTRG. 14966. 1 | 85   | 0. 2667  | 9. 916564941 | 1  |
| MSTRG. 14968. 7 | 1977 | 0. 46009 | 5. 846740723 | 1  |
| MSTRG. 14968. 4 | 1455 | 0. 38618 | 5. 22479248  | 1  |
| MSTRG. 14968. 5 | 1455 | 0. 38618 | 5. 22479248  | 1  |
| MSTRG. 14968. 8 | 2108 | 0. 40594 | 6. 008728027 | 1  |
| MSTRG. 14969. 1 | 55   | 0. 32949 | 4. 649230957 | 1  |
| MSTRG. 14970. 1 | 25   | 0. 3611  | 10. 76312256 | 1  |
| MSTRG. 14975. 1 | 37   | 0. 38745 | 6. 523498535 | 1  |
| MSTRG. 14986. 2 | 130  | 0. 27957 | 8. 41204834  | 1  |
| MSTRG. 14986. 3 | 130  | 0. 3452  | 8. 41204834  | 1  |
| MSTRG. 14987. 2 | 1333 | 0. 459   | 7. 871154785 | 1  |
| MSTRG. 14989. 1 | 297  | 0. 36527 | 6. 665344238 | 1  |
| MSTRG. 14989. 2 | 170  | 0. 36527 | 8. 38494873  | 1  |
| MSTRG. 14989. 3 | 170  | 0. 30445 | 8. 38494873  | 1  |
| MSTRG. 14990. 1 | 178  | 0. 3818  | 12. 07440186 | 1  |
| MSTRG. 14992. 2 | 364  | 0. 4388  | 9. 530578613 | 1  |
| MSTRG. 15000. 1 | 27   | 0. 37115 | 9. 901550293 | 1  |
| MSTRG. 15001. 1 | 153  | 0. 36406 | 7. 752746582 | 1  |
| MSTRG. 15007. 4 | 4417 | 0. 4884  | 5. 770446777 | 1  |
| MSTRG. 15007. 5 | 4454 | 0. 47405 | 5. 740905762 | -1 |
| MSTRG. 15007. 7 | 66   | 0. 34294 | 6. 52142334  | 1  |
| MSTRG. 15007. 8 | 2969 | 0. 4807  | 5. 937561035 | 1  |
| MSTRG. 14997. 1 | 32   | 0. 42044 | 6. 678649902 | 1  |



|                 |     |          |              |    |
|-----------------|-----|----------|--------------|----|
| MSTRG. 14998. 1 | 51  | 0. 36072 | 10. 8147583  | 1  |
| MSTRG. 15017. 1 | 62  | 0. 38634 | 9. 984069824 | 1  |
| MSTRG. 15018. 1 | 90  | 0. 29452 | 4. 957458496 | 1  |
| MSTRG. 15021. 1 | 780 | 0. 3208  | 5. 08782959  | 1  |
| MSTRG. 15021. 4 | 677 | 0. 427   | 4. 977233887 | 1  |
| MSTRG. 15022. 1 | 92  | 0. 35836 | 10. 6807251  | 1  |
| MSTRG. 15023. 4 | 483 | 0. 48148 | 6. 281066895 | 1  |
| MSTRG. 15023. 5 | 477 | 0. 47093 | 6. 171203613 | -1 |
| MSTRG. 15033. 1 | 890 | 0. 40013 | 6. 354431152 | 1  |
| MSTRG. 15033. 2 | 890 | 0. 39932 | 6. 354431152 | 1  |
| MSTRG. 15033. 5 | 890 | 0. 40109 | 6. 354431152 | 1  |
| MSTRG. 15026. 1 | 106 | 0. 37219 | 8. 77166748  | 1  |
| MSTRG. 15028. 1 | 211 | 0. 28771 | 6. 185852051 | 1  |
| MSTRG. 15038. 2 | 122 | 0. 461   | 4. 917297363 | 1  |
| MSTRG. 15046. 1 | 505 | 0. 46954 | 6. 862609863 | 1  |
| MSTRG. 15046. 4 | 294 | 0. 33851 | 5. 737487793 | 1  |
| MSTRG. 15046. 5 | 413 | 0. 40078 | 8. 819519043 | 1  |
| MSTRG. 15046. 6 | 237 | 0. 30989 | 8. 355285645 | 1  |
| MSTRG. 15046. 7 | 221 | 0. 41437 | 8. 372375488 | 1  |
| MSTRG. 15047. 1 | 189 | 0. 30084 | 10. 01263428 | 1  |
| MSTRG. 15047. 2 | 144 | 0. 32072 | 6. 680358887 | 1  |
| MSTRG. 15046. 9 | 107 | 0. 29202 | 6. 678771973 | 1  |
| MSTRG. 15050. 6 | 137 | 0. 4981  | 9. 843811035 | 1  |
| MSTRG. 15050. 2 | 137 | 0. 47965 | 9. 843811035 | 1  |
| MSTRG. 15050. 4 | 137 | 0. 47493 | 9. 843811035 | 1  |
| MSTRG. 15050. 7 | 137 | 0. 47188 | 9. 843811035 | 1  |
| MSTRG. 15051. 1 | 588 | 0. 41605 | 7. 247009277 | 1  |
| MSTRG. 15051. 2 | 588 | 0. 32477 | 7. 247009277 | 1  |
| MSTRG. 15051. 3 | 588 | 0. 38835 | 7. 247009277 | 1  |
| MSTRG. 15051. 4 | 588 | 0. 43372 | 7. 247009277 | 1  |
| MSTRG. 15052. 2 | 44  | 0. 38199 | 9. 984436035 | 1  |
| MSTRG. 15054. 1 | 79  | 0. 42364 | 6. 157897949 | 1  |
| MSTRG. 15043. 1 | 144 | 0. 29543 | 9. 300354004 | 1  |
| MSTRG. 15039. 1 | 20  | 0. 40727 | 6. 501525879 | 1  |
| MSTRG. 15055. 2 | 894 | 0. 41195 | 7. 006530762 | 1  |
| MSTRG. 15055. 4 | 342 | 0. 35564 | 8. 875305176 | 1  |
| MSTRG. 15055. 6 | 826 | 0. 44668 | 7. 163757324 | 1  |
| MSTRG. 15055. 7 | 810 | 0. 43759 | 8. 230529785 | 1  |
| MSTRG. 15055. 8 | 805 | 0. 47841 | 6. 995056152 | 1  |
| MSTRG. 15057. 1 | 101 | 0. 38162 | 10. 28094482 | -1 |
| MSTRG. 15058. 1 | 71  | 0. 3588  | 7. 703796387 | 1  |
| MSTRG. 15045. 1 | 41  | 0. 33031 | 11. 4196167  | 1  |
| MSTRG. 15068. 1 | 56  | 0. 32172 | 7. 811218262 | -1 |
| MSTRG. 15072. 1 | 24  | 0. 47872 | 5. 19354248  | 1  |
| MSTRG. 15072. 2 | 59  | 0. 3593  | 10. 28643799 | 1  |
| MSTRG. 15080. 1 | 103 | 0. 34956 | 10. 00274658 | 1  |
| MSTRG. 15083. 4 | 934 | 0. 44615 | 5. 803161621 | 1  |
| MSTRG. 15083. 3 | 981 | 0. 44512 | 5. 924499512 | 1  |
| MSTRG. 15083. 5 | 117 | 0. 30817 | 7. 902770996 | 1  |
| MSTRG. 15084. 1 | 159 | 0. 30191 | 10. 28436279 | 1  |
| MSTRG. 15085. 1 | 127 | 0. 40426 | 10. 36810303 | 1  |
| MSTRG. 15090. 1 | 282 | 0. 39503 | 8. 936828613 | 1  |
| MSTRG. 15090. 2 | 233 | 0. 2887  | 6. 236999512 | 1  |
| MSTRG. 15091. 1 | 65  | 0. 31696 | 9. 783752441 | 1  |

|                  |      |          |              |    |
|------------------|------|----------|--------------|----|
| MSTRG. 15092. 1  | 78   | 0. 36556 | 6. 829040527 | 1  |
| MSTRG. 15093. 10 | 492  | 0. 32507 | 6. 623596191 | 1  |
| MSTRG. 15093. 9  | 591  | 0. 33375 | 9. 020202637 | 1  |
| MSTRG. 15093. 11 | 459  | 0. 44525 | 8. 194519043 | 1  |
| MSTRG. 15093. 12 | 509  | 0. 41412 | 8. 463562012 | 1  |
| MSTRG. 15097. 3  | 1417 | 0. 44417 | 6. 986877441 | 1  |
| MSTRG. 15097. 4  | 273  | 0. 30742 | 8. 128479004 | 1  |
| MSTRG. 15100. 2  | 1491 | 0. 40237 | 7. 485290527 | 1  |
| MSTRG. 15105. 1  | 392  | 0. 38439 | 5. 101501465 | 1  |
| MSTRG. 15105. 2  | 387  | 0. 37124 | 5. 056335449 | 1  |
| MSTRG. 15105. 5  | 377  | 0. 36156 | 5. 649597168 | 1  |
| MSTRG. 15105. 3  | 479  | 0. 31369 | 4. 979309082 | 1  |
| MSTRG. 15105. 4  | 443  | 0. 38439 | 5. 829406738 | 1  |
| MSTRG. 15105. 6  | 327  | 0. 40524 | 5. 101623535 | 1  |
| MSTRG. 15105. 8  | 479  | 0. 32723 | 4. 979309082 | 1  |
| MSTRG. 15105. 9  | 110  | 0. 27398 | 7. 63482666  | 1  |
| MSTRG. 15106. 1  | 125  | 0. 27661 | 10. 62030029 | 1  |
| MSTRG. 15106. 2  | 101  | 0. 30868 | 10. 07037354 | 1  |
| MSTRG. 15106. 3  | 157  | 0. 33264 | 9. 886047363 | 1  |
| MSTRG. 15107. 1  | 457  | 0. 31793 | 4. 784240723 | 1  |
| MSTRG. 15108. 1  | 218  | 0. 41106 | 9. 464904785 | 1  |
| MSTRG. 15108. 2  | 262  | 0. 42801 | 9. 013000488 | 1  |
| MSTRG. 15109. 1  | 29   | 0. 312   | 10. 76287842 | -1 |
| MSTRG. 15109. 2  | 63   | 0. 32531 | 8. 653503418 | -1 |
| MSTRG. 15105. 11 | 69   | 0. 2962  | 4. 928527832 | 1  |
| MSTRG. 15124. 5  | 572  | 0. 38694 | 5. 04901123  | 1  |
| MSTRG. 15126. 1  | 46   | 0. 36382 | 11. 00006104 | 1  |
| MSTRG. 15127. 5  | 150  | 0. 45006 | 5. 915588379 | 1  |
| MSTRG. 15127. 4  | 180  | 0. 29387 | 8. 928649902 | 1  |
| MSTRG. 15127. 3  | 176  | 0. 28982 | 9. 654602051 | 1  |
| MSTRG. 15127. 1  | 176  | 0. 2921  | 9. 654602051 | 1  |
| MSTRG. 15129. 1  | 82   | 0. 3616  | 6. 228210449 | 1  |
| MSTRG. 15131. 1  | 67   | 0. 29374 | 6. 806091309 | 1  |
| MSTRG. 15132. 1  | 68   | 0. 32413 | 8. 934387207 | 1  |
| MSTRG. 15118. 3  | 159  | 0. 43308 | 9. 127258301 | 1  |
| MSTRG. 15119. 1  | 42   | 0. 40976 | 4. 100524902 | 1  |
| MSTRG. 15141. 1  | 149  | 0. 2785  | 8. 906555176 | 1  |
| MSTRG. 15141. 2  | 870  | 0. 45522 | 5. 747741699 | 1  |
| MSTRG. 15141. 4  | 646  | 0. 39243 | 5. 190856934 | 1  |
| MSTRG. 15138. 1  | 110  | 0. 31246 | 9. 840026855 | 1  |
| MSTRG. 15138. 2  | 41   | 0. 34188 | 9. 624694824 | 1  |
| MSTRG. 15145. 1  | 205  | 0. 33851 | 5. 94354248  | 1  |
| MSTRG. 15146. 4  | 56   | 0. 26334 | 7. 702819824 | 1  |
| MSTRG. 15146. 5  | 219  | 0. 30553 | 9. 085510254 | 1  |
| MSTRG. 15146. 6  | 230  | 0. 36066 | 9. 074157715 | 1  |
| MSTRG. 15146. 7  | 237  | 0. 33348 | 8. 668395996 | 1  |
| MSTRG. 15146. 10 | 124  | 0. 35151 | 9. 266296387 | 1  |
| MSTRG. 15146. 13 | 124  | 0. 31842 | 9. 266296387 | 1  |
| MSTRG. 15146. 11 | 219  | 0. 34582 | 9. 085510254 | 1  |
| MSTRG. 15146. 15 | 219  | 0. 34931 | 9. 085510254 | 1  |
| MSTRG. 15146. 8  | 219  | 0. 32943 | 9. 085510254 | 1  |
| MSTRG. 15146. 14 | 227  | 0. 36521 | 8. 97479248  | 1  |
| MSTRG. 15146. 12 | 124  | 0. 37201 | 9. 266296387 | 1  |
| MSTRG. 15147. 2  | 81   | 0. 39578 | 10. 36700439 | 1  |

|                  |      |          |              |    |
|------------------|------|----------|--------------|----|
| MSTRG. 15149. 1  | 536  | 0. 32237 | 8. 845275879 | 1  |
| MSTRG. 15151. 1  | 126  | 0. 44589 | 9. 695861816 | -1 |
| MSTRG. 15152. 1  | 154  | 0. 42436 | 7. 673522949 | -1 |
| MSTRG. 15143. 1  | 31   | 0. 3817  | 3. 838806152 | 1  |
| MSTRG. 15156. 3  | 667  | 0. 43654 | 6. 09942627  | 1  |
| MSTRG. 15156. 4  | 236  | 0. 36769 | 5. 63861084  | 1  |
| MSTRG. 15153. 1  | 314  | 0. 44741 | 6. 25189209  | 1  |
| MSTRG. 15153. 2  | 314  | 0. 4624  | 6. 25189209  | 1  |
| MSTRG. 15167. 2  | 74   | 0. 38096 | 6. 542419434 | 1  |
| MSTRG. 15174. 3  | 864  | 0. 45549 | 6. 178649902 | 1  |
| MSTRG. 15175. 1  | 99   | 0. 31501 | 5. 994934082 | 1  |
| MSTRG. 15176. 1  | 104  | 0. 30945 | 7. 718811035 | 1  |
| MSTRG. 15174. 4  | 110  | 0. 3     | 6. 71673584  | 1  |
| MSTRG. 15174. 5  | 232  | 0. 3287  | 9. 20880127  | 1  |
| MSTRG. 15177. 1  | 56   | 0. 32821 | 5. 997619629 | 1  |
| MSTRG. 15181. 1  | 780  | 0. 36604 | 6. 493469238 | 1  |
| MSTRG. 15181. 5  | 53   | 0. 35887 | 6. 68951416  | 1  |
| MSTRG. 15183. 2  | 147  | 0. 4498  | 3. 862243652 | 1  |
| MSTRG. 15184. 1  | 307  | 0. 40171 | 6. 098571777 | 1  |
| MSTRG. 15184. 2  | 487  | 0. 38703 | 8. 694274902 | 1  |
| MSTRG. 15185. 1  | 109  | 0. 28648 | 9. 207214355 | 1  |
| MSTRG. 15184. 3  | 701  | 0. 43829 | 8. 489929199 | 1  |
| MSTRG. 15184. 5  | 336  | 0. 35025 | 7. 941101074 | 1  |
| MSTRG. 15184. 9  | 153  | 0. 40617 | 8. 537658691 | 1  |
| MSTRG. 15184. 10 | 139  | 0. 28567 | 10. 03643799 | 1  |
| MSTRG. 15188. 1  | 84   | 0. 34993 | 4. 621887207 | 1  |
| MSTRG. 15188. 2  | 125  | 0. 39224 | 9. 652770996 | -1 |
| MSTRG. 15190. 1  | 583  | 0. 41442 | 5. 970031738 | 1  |
| MSTRG. 15190. 6  | 156  | 0. 33171 | 5. 637023926 | 1  |
| MSTRG. 15191. 1  | 83   | 0. 28648 | 8. 885559082 | 1  |
| MSTRG. 15192. 1  | 93   | 0. 28683 | 10. 17938232 | 1  |
| MSTRG. 15194. 1  | 147  | 0. 28518 | 9. 439025879 | 1  |
| MSTRG. 15219. 1  | 1476 | 0. 426   | 5. 643005371 | 1  |
| MSTRG. 15219. 2  | 323  | 0. 4011  | 5. 601013184 | 1  |
| MSTRG. 15219. 3  | 1467 | 0. 46376 | 5. 642150879 | 1  |
| MSTRG. 15220. 1  | 68   | 0. 41749 | 10. 27728271 | -1 |
| MSTRG. 15221. 1  | 56   | 0. 44661 | 6. 805480957 | -1 |
| MSTRG. 15227. 1  | 143  | 0. 28831 | 10. 11846924 | 1  |
| MSTRG. 15253. 1  | 84   | 0. 27893 | 10. 95648193 | 1  |
| MSTRG. 15197. 1  | 30   | 0. 4341  | 8. 34197998  | -1 |
| MSTRG. 15199. 1  | 119  | 0. 46361 | 9. 613952637 | -1 |
| MSTRG. 15209. 3  | 439  | 0. 42545 | 5. 143371582 | 1  |
| MSTRG. 15210. 1  | 84   | 0. 25541 | 9. 353942871 | 1  |
| MSTRG. 15210. 2  | 53   | 0. 30831 | 4. 206970215 | 1  |
| MSTRG. 15209. 4  | 145  | 0. 45442 | 6. 18548584  | -1 |
| MSTRG. 15212. 1  | 55   | 0. 40323 | 11. 00860596 | -1 |
| MSTRG. 15213. 2  | 109  | 0. 39332 | 6. 719909668 | 1  |
| MSTRG. 15268. 1  | 24   | 0. 30546 | 8. 345397949 | 1  |
| MSTRG. 15268. 2  | 24   | 0. 34625 | 8. 345397949 | 1  |
| MSTRG. 15284. 1  | 208  | 0. 39897 | 8. 842956543 | 1  |
| MSTRG. 15287. 5  | 2363 | 0. 45256 | 5. 390319824 | 1  |
| MSTRG. 15287. 6  | 2363 | 0. 4647  | 5. 390319824 | 1  |
| MSTRG. 15291. 1  | 273  | 0. 44103 | 6. 497253418 | 1  |
| MSTRG. 15296. 3  | 122  | 0. 31035 | 4. 90435791  | 1  |

|                 |      |          |              |    |
|-----------------|------|----------|--------------|----|
| MSTRG. 15302. 2 | 1840 | 0. 45088 | 5. 826477051 | 1  |
| MSTRG. 15312. 1 | 157  | 0. 27772 | 9. 40826416  | 1  |
| MSTRG. 15304. 1 | 123  | 0. 3947  | 6. 949035645 | -1 |
| MSTRG. 15328. 2 | 190  | 0. 44625 | 5. 66229248  | 1  |
| MSTRG. 15333. 1 | 59   | 0. 31889 | 4. 657043457 | 1  |
| MSTRG. 15338. 1 | 60   | 0. 37555 | 6. 151306152 | 1  |
| MSTRG. 15347. 1 | 331  | 0. 3283  | 4. 983093262 | 1  |
| MSTRG. 15353. 1 | 133  | 0. 39367 | 5. 774719238 | 1  |
| MSTRG. 15359. 2 | 717  | 0. 38713 | 6. 33026123  | 1  |
| MSTRG. 15360. 1 | 168  | 0. 27415 | 7. 653747559 | 1  |
| MSTRG. 15360. 2 | 99   | 0. 44223 | 5. 570251465 | -1 |
| MSTRG. 15362. 1 | 74   | 0. 3257  | 6. 01385498  | 1  |
| MSTRG. 15357. 1 | 48   | 0. 31117 | 8. 803405762 | 1  |
| MSTRG. 15368. 2 | 487  | 0. 4702  | 6. 675720215 | 1  |
| MSTRG. 15368. 3 | 487  | 0. 48822 | 6. 675720215 | 1  |
| MSTRG. 15375. 2 | 3023 | 0. 48143 | 5. 53338623  | 1  |
| MSTRG. 15379. 2 | 676  | 0. 4461  | 5. 493469238 | 1  |
| MSTRG. 15381. 1 | 100  | 0. 44099 | 6. 292297363 | 1  |
| MSTRG. 15381. 2 | 151  | 0. 47275 | 6. 073791504 | 1  |
| MSTRG. 15381. 3 | 151  | 0. 46066 | 6. 073791504 | 1  |
| MSTRG. 15380. 1 | 61   | 0. 37176 | 9. 648376465 | 1  |
| MSTRG. 15380. 2 | 61   | 0. 36342 | 9. 648376465 | 1  |
| MSTRG. 15383. 1 | 35   | 0. 41037 | 7. 918029785 | 1  |
| MSTRG. 15386. 3 | 252  | 0. 43116 | 9. 066345215 | 1  |
| MSTRG. 15386. 5 | 379  | 0. 31588 | 7. 265563965 | 1  |
| MSTRG. 15394. 2 | 99   | 0. 39061 | 6. 934020996 | 1  |
| MSTRG. 15394. 1 | 110  | 0. 33322 | 6. 985290527 | 1  |
| MSTRG. 15399. 1 | 34   | 0. 32076 | 6. 057434082 | 1  |
| MSTRG. 15405. 4 | 1064 | 0. 42004 | 5. 207214355 | 1  |
| MSTRG. 15405. 6 | 496  | 0. 39807 | 9. 070495605 | 1  |
| MSTRG. 15402. 1 | 76   | 0. 41767 | 8. 879699707 | 1  |
| MSTRG. 15416. 3 | 37   | 0. 43644 | 9. 303161621 | 1  |
| MSTRG. 15416. 4 | 257  | 0. 33762 | 9. 346496582 | 1  |
| MSTRG. 15421. 1 | 607  | 0. 41501 | 5. 481994629 | 1  |
| MSTRG. 15421. 2 | 571  | 0. 35397 | 6. 230773926 | 1  |
| MSTRG. 15422. 1 | 61   | 0. 37606 | 8. 769470215 | 1  |
| MSTRG. 15423. 1 | 195  | 0. 33963 | 8. 578186035 | -1 |
| MSTRG. 15426. 4 | 149  | 0. 32106 | 8. 969055176 | 1  |
| MSTRG. 15427. 2 | 110  | 0. 43438 | 11. 12091064 | 1  |
| MSTRG. 15429. 6 | 687  | 0. 46207 | 6. 971740723 | 1  |
| MSTRG. 15429. 7 | 760  | 0. 46672 | 6. 260314941 | 1  |
| MSTRG. 15429. 8 | 501  | 0. 46672 | 5. 574279785 | 1  |
| MSTRG. 15431. 1 | 1609 | 0. 45917 | 6. 885314941 | 1  |
| MSTRG. 15431. 3 | 1609 | 0. 45917 | 6. 885314941 | 1  |
| MSTRG. 15433. 3 | 391  | 0. 38919 | 8. 960876465 | 1  |
| MSTRG. 15433. 5 | 116  | 0. 28842 | 9. 510192871 | 1  |
| MSTRG. 15436. 2 | 296  | 0. 44559 | 8. 596252441 | 1  |
| MSTRG. 15436. 3 | 549  | 0. 45789 | 8. 968811035 | 1  |
| MSTRG. 15442. 1 | 219  | 0. 41175 | 5. 655456543 | 1  |
| MSTRG. 15444. 2 | 67   | 0. 35209 | 9. 896057129 | 1  |
| MSTRG. 15444. 3 | 100  | 0. 2908  | 4. 975769043 | 1  |
| MSTRG. 15447. 5 | 129  | 0. 30989 | 9. 546081543 | 1  |
| MSTRG. 15447. 4 | 381  | 0. 39091 | 7. 699523926 | 1  |
| MSTRG. 15447. 6 | 287  | 0. 40246 | 9. 376403809 | 1  |

|                 |      |          |               |    |
|-----------------|------|----------|---------------|----|
| MSTRG. 15447. 8 | 287  | 0. 3886  | 9. 376403809  | 1  |
| MSTRG. 15447. 9 | 85   | 0. 28338 | 9. 235778809  | 1  |
| MSTRG. 15450. 2 | 331  | 0. 37197 | 9. 888000488  | 1  |
| MSTRG. 15450. 3 | 439  | 0. 37983 | 9. 761169434  | 1  |
| MSTRG. 15457. 1 | 85   | 0. 32573 | 10. 754455557 | 1  |
| MSTRG. 15467. 2 | 1802 | 0. 46358 | 5. 338439941  | 1  |
| MSTRG. 15469. 1 | 32   | 0. 444   | 3. 929626465  | 1  |
| MSTRG. 15470. 1 | 54   | 0. 40072 | 6. 355407715  | 1  |
| MSTRG. 15471. 1 | 54   | 0. 37824 | 11. 00860596  | -1 |
| MSTRG. 15486. 2 | 601  | 0. 46705 | 6. 14263916   | 1  |
| MSTRG. 15486. 4 | 180  | 0. 44495 | 10. 78131104  | 1  |
| MSTRG. 15490. 1 | 131  | 0. 29772 | 9. 69342041   | 1  |
| MSTRG. 15491. 1 | 115  | 0. 32002 | 11. 88800049  | 1  |
| MSTRG. 15492. 1 | 118  | 0. 29772 | 6. 264709473  | 1  |
| MSTRG. 15492. 2 | 105  | 0. 29772 | 9. 270202637  | 1  |
| MSTRG. 15493. 1 | 116  | 0. 29772 | 5. 596252441  | 1  |
| MSTRG. 15494. 1 | 86   | 0. 31204 | 7. 571838379  | 1  |
| MSTRG. 15486. 5 | 396  | 0. 32642 | 7. 641296387  | 1  |
| MSTRG. 15494. 2 | 66   | 0. 29373 | 8. 934875488  | 1  |
| MSTRG. 15497. 1 | 274  | 0. 29367 | 5. 960021973  | 1  |
| MSTRG. 15499. 1 | 91   | 0. 29771 | 9. 356750488  | 1  |
| MSTRG. 15499. 2 | 103  | 0. 37494 | 6. 798156738  | 1  |
| MSTRG. 15500. 1 | 73   | 0. 29852 | 9. 511901855  | 1  |
| MSTRG. 15502. 1 | 227  | 0. 33597 | 7. 57208252   | 1  |
| MSTRG. 15503. 1 | 166  | 0. 33764 | 9. 257629395  | 1  |
| MSTRG. 15502. 2 | 233  | 0. 38114 | 9. 047058105  | -1 |
| MSTRG. 15477. 1 | 49   | 0. 38747 | 8. 958068848  | 1  |
| MSTRG. 15480. 2 | 146  | 0. 29636 | 9. 695739746  | 1  |
| MSTRG. 15532. 2 | 3547 | 0. 47949 | 5. 510070801  | 1  |
| MSTRG. 15532. 1 | 3535 | 0. 46893 | 5. 524108887  | 1  |
| MSTRG. 15532. 4 | 813  | 0. 35567 | 6. 069152832  | 1  |
| MSTRG. 15532. 5 | 3348 | 0. 48934 | 5. 573425293  | 1  |
| MSTRG. 15532. 3 | 3348 | 0. 47949 | 5. 573425293  | 1  |
| MSTRG. 15532. 6 | 1757 | 0. 47806 | 5. 613952637  | 1  |
| MSTRG. 15533. 1 | 101  | 0. 33979 | 4. 841125488  | 1  |
| MSTRG. 15532. 8 | 1182 | 0. 39591 | 5. 191955566  | 1  |
| MSTRG. 15534. 1 | 47   | 0. 31108 | 5. 302062988  | 1  |
| MSTRG. 15535. 1 | 1071 | 0. 47668 | 5. 742858887  | 1  |
| MSTRG. 15536. 1 | 268  | 0. 29059 | 9. 862731934  | 1  |
| MSTRG. 15535. 3 | 1071 | 0. 47799 | 5. 742858887  | 1  |
| MSTRG. 15535. 4 | 1071 | 0. 48926 | 5. 742858887  | 1  |
| MSTRG. 15538. 1 | 84   | 0. 30387 | 9. 925598145  | 1  |
| MSTRG. 15517. 1 | 133  | 0. 28567 | 9. 538757324  | 1  |
| MSTRG. 15518. 4 | 574  | 0. 39506 | 9. 420471191  | 1  |
| MSTRG. 15518. 5 | 574  | 0. 38332 | 9. 420471191  | 1  |
| MSTRG. 15518. 6 | 461  | 0. 37443 | 9. 689147949  | 1  |
| MSTRG. 15518. 8 | 443  | 0. 41115 | 9. 72076416   | 1  |
| MSTRG. 15518. 7 | 416  | 0. 41349 | 9. 727478027  | 1  |
| MSTRG. 15519. 1 | 106  | 0. 34047 | 11. 61700439  | 1  |
| MSTRG. 15521. 2 | 157  | 0. 2985  | 8. 451721191  | 1  |
| MSTRG. 15521. 3 | 97   | 0. 31287 | 7. 930603027  | 1  |
| MSTRG. 15528. 3 | 59   | 0. 32042 | 11. 34661865  | 1  |
| MSTRG. 15540. 2 | 1161 | 0. 47357 | 5. 677185059  | 1  |
| MSTRG. 15540. 8 | 410  | 0. 45457 | 5. 156677246  | 1  |

|                  |      |          |              |    |
|------------------|------|----------|--------------|----|
| MSTRG. 15540. 7  | 1043 | 0. 46891 | 5. 944641113 | 1  |
| MSTRG. 15547. 1  | 103  | 0. 28498 | 10. 56072998 | 1  |
| MSTRG. 15547. 2  | 88   | 0. 33061 | 9. 901184082 | 1  |
| MSTRG. 15547. 3  | 92   | 0. 32257 | 5. 479431152 | 1  |
| MSTRG. 15548. 1  | 209  | 0. 33834 | 8. 188415527 | 1  |
| MSTRG. 15548. 2  | 153  | 0. 44857 | 6. 098937988 | -1 |
| MSTRG. 15548. 3  | 153  | 0. 4495  | 6. 098937988 | -1 |
| MSTRG. 15549. 1  | 124  | 0. 40674 | 6. 742248535 | -1 |
| MSTRG. 15554. 1  | 80   | 0. 2982  | 12. 01385498 | 1  |
| MSTRG. 15572. 1  | 98   | 0. 3783  | 9. 74420166  | 1  |
| MSTRG. 15571. 3  | 91   | 0. 3208  | 8. 61505127  | 1  |
| MSTRG. 15571. 4  | 140  | 0. 35757 | 8. 97479248  | 1  |
| MSTRG. 15563. 1  | 64   | 0. 32213 | 6. 948303223 | 1  |
| MSTRG. 15574. 1  | 125  | 0. 38938 | 5. 090026855 | 1  |
| MSTRG. 15575. 1  | 77   | 0. 31641 | 8. 403625488 | 1  |
| MSTRG. 15594. 4  | 642  | 0. 36009 | 5. 797912598 | 1  |
| MSTRG. 15595. 1  | 205  | 0. 36481 | 5. 931335449 | 1  |
| MSTRG. 15595. 2  | 199  | 0. 31637 | 6. 597961426 | 1  |
| MSTRG. 15596. 2  | 220  | 0. 34522 | 6. 691589355 | 1  |
| MSTRG. 15596. 3  | 417  | 0. 36111 | 6. 258850098 | 1  |
| MSTRG. 15600. 2  | 246  | 0. 35214 | 5. 971862793 | 1  |
| MSTRG. 15601. 1  | 44   | 0. 36594 | 8. 843688965 | 1  |
| MSTRG. 15602. 1  | 91   | 0. 39036 | 4. 96661377  | 1  |
| MSTRG. 15602. 2  | 227  | 0. 3369  | 8. 907165527 | 1  |
| MSTRG. 15603. 3  | 898  | 0. 45097 | 8. 850158691 | 1  |
| MSTRG. 15611. 2  | 202  | 0. 42546 | 8. 570983887 | 1  |
| MSTRG. 15614. 2  | 188  | 0. 4715  | 4. 901916504 | 1  |
| MSTRG. 15618. 1  | 479  | 0. 46468 | 5. 239074707 | -1 |
| MSTRG. 15619. 2  | 529  | 0. 38862 | 7. 896911621 | 1  |
| MSTRG. 15619. 3  | 292  | 0. 45538 | 5. 29473877  | 1  |
| MSTRG. 15619. 4  | 282  | 0. 31186 | 9. 265563965 | 1  |
| MSTRG. 15625. 1  | 1123 | 0. 32947 | 8. 032409668 | 1  |
| MSTRG. 15625. 2  | 1124 | 0. 45237 | 8. 032409668 | 1  |
| MSTRG. 15628. 2  | 286  | 0. 36048 | 7. 585144043 | 1  |
| MSTRG. 15630. 3  | 123  | 0. 38367 | 11. 61651611 | 1  |
| MSTRG. 15630. 2  | 190  | 0. 32661 | 9. 013977051 | 1  |
| MSTRG. 15638. 2  | 574  | 0. 36616 | 9. 14666748  | 1  |
| MSTRG. 15638. 3  | 574  | 0. 35893 | 9. 14666748  | 1  |
| MSTRG. 15638. 4  | 414  | 0. 42143 | 8. 869689941 | 1  |
| MSTRG. 15638. 8  | 86   | 0. 36799 | 9. 300842285 | -1 |
| MSTRG. 15638. 10 | 59   | 0. 32157 | 6. 875427246 | 1  |
| MSTRG. 15644. 1  | 668  | 0. 41192 | 5. 810974121 | 1  |
| MSTRG. 15644. 4  | 212  | 0. 41045 | 9. 435974121 | 1  |
| MSTRG. 15644. 7  | 204  | 0. 30297 | 7. 637878418 | 1  |
| MSTRG. 15644. 5  | 210  | 0. 42803 | 9. 32244873  | 1  |
| MSTRG. 15644. 6  | 180  | 0. 35877 | 9. 068786621 | 1  |
| MSTRG. 15650. 1  | 177  | 0. 37376 | 10. 51934814 | -1 |
| MSTRG. 15651. 1  | 225  | 0. 35742 | 9. 174377441 | 1  |
| MSTRG. 15656. 1  | 104  | 0. 30577 | 9. 981994629 | 1  |
| MSTRG. 15671. 1  | 45   | 0. 43725 | 10. 42486572 | 1  |
| MSTRG. 15654. 1  | 644  | 0. 47481 | 8. 74005127  | 1  |
| MSTRG. 15654. 2  | 649  | 0. 48082 | 8. 447692871 | 1  |
| MSTRG. 15677. 1  | 473  | 0. 38211 | 8. 978210449 | 1  |
| MSTRG. 15678. 2  | 327  | 0. 32729 | 5. 843078613 | 1  |

|                  |      |          |              |    |
|------------------|------|----------|--------------|----|
| MSTRG. 15679. 1  | 65   | 0. 31488 | 10. 58868408 | -1 |
| MSTRG. 15678. 3  | 327  | 0. 36997 | 5. 843078613 | 1  |
| MSTRG. 15678. 4  | 327  | 0. 3508  | 5. 843078613 | 1  |
| MSTRG. 15672. 1  | 31   | 0. 44244 | 5. 410461426 | -1 |
| MSTRG. 15674. 1  | 295  | 0. 48019 | 6. 388122559 | 1  |
| MSTRG. 15675. 1  | 49   | 0. 34761 | 10. 37982178 | 1  |
| MSTRG. 15681. 2  | 56   | 0. 44456 | 6. 221008301 | -1 |
| MSTRG. 15681. 3  | 56   | 0. 36024 | 6. 221008301 | -1 |
| MSTRG. 15681. 5  | 383  | 0. 41877 | 5. 611022949 | 1  |
| MSTRG. 15681. 4  | 383  | 0. 42729 | 5. 611022949 | 1  |
| MSTRG. 15682. 1  | 112  | 0. 32714 | 6. 948547363 | 1  |
| MSTRG. 15683. 1  | 55   | 0. 27433 | 5. 537414551 | 1  |
| MSTRG. 15681. 6  | 52   | 0. 41318 | 3. 968322754 | 1  |
| MSTRG. 15684. 1  | 252  | 0. 45814 | 4. 568908691 | 1  |
| MSTRG. 15681. 8  | 86   | 0. 36904 | 12. 1260376  | 1  |
| MSTRG. 15685. 2  | 740  | 0. 41191 | 4. 951721191 | 1  |
| MSTRG. 15692. 1  | 26   | 0. 43484 | 9. 976501465 | -1 |
| MSTRG. 15694. 3  | 5931 | 0. 40951 | 9. 006286621 | 1  |
| MSTRG. 15694. 1  | 6002 | 0. 40951 | 9. 02935791  | 1  |
| MSTRG. 15694. 2  | 5994 | 0. 40951 | 9. 023376465 | 1  |
| MSTRG. 15694. 4  | 5994 | 0. 40951 | 9. 01776123  | 1  |
| MSTRG. 15701. 4  | 535  | 0. 46684 | 5. 023986816 | 1  |
| MSTRG. 15701. 5  | 535  | 0. 45    | 5. 023986816 | 1  |
| MSTRG. 15703. 5  | 171  | 0. 4409  | 9. 647644043 | 1  |
| MSTRG. 15703. 4  | 202  | 0. 4409  | 9. 669616699 | 1  |
| MSTRG. 15703. 6  | 202  | 0. 4409  | 9. 669616699 | 1  |
| MSTRG. 15703. 7  | 171  | 0. 4409  | 9. 647644043 | 1  |
| MSTRG. 15705. 3  | 493  | 0. 48152 | 9. 480895996 | 1  |
| MSTRG. 15707. 2  | 150  | 0. 3432  | 9. 207214355 | 1  |
| MSTRG. 15707. 4  | 150  | 0. 35445 | 9. 207214355 | 1  |
| MSTRG. 15714. 3  | 161  | 0. 33363 | 8. 653991699 | 1  |
| MSTRG. 15714. 4  | 157  | 0. 38281 | 8. 497253418 | 1  |
| MSTRG. 15715. 1  | 304  | 0. 3759  | 6. 178527832 | 1  |
| MSTRG. 15715. 5  | 372  | 0. 39757 | 5. 993103027 | 1  |
| MSTRG. 15715. 6  | 304  | 0. 3536  | 6. 178527832 | 1  |
| MSTRG. 15719. 2  | 69   | 0. 30297 | 6. 876403809 | 1  |
| MSTRG. 15720. 1  | 638  | 0. 43654 | 8. 109069824 | 1  |
| MSTRG. 15720. 2  | 638  | 0. 43654 | 8. 109069824 | 1  |
| MSTRG. 15720. 3  | 638  | 0. 43378 | 8. 109069824 | 1  |
| MSTRG. 15708. 1  | 79   | 0. 31886 | 9. 738708496 | 1  |
| MSTRG. 15709. 1  | 398  | 0. 3442  | 10. 04608154 | 1  |
| MSTRG. 15711. 3  | 163  | 0. 44864 | 5. 567810059 | 1  |
| MSTRG. 15722. 4  | 581  | 0. 3449  | 9. 94732666  | 1  |
| MSTRG. 15722. 10 | 507  | 0. 33379 | 9. 944152832 | 1  |
| MSTRG. 15722. 9  | 796  | 0. 40074 | 9. 550354004 | 1  |
| MSTRG. 15724. 2  | 622  | 0. 46739 | 9. 172668457 | 1  |
| MSTRG. 15726. 5  | 281  | 0. 4207  | 5. 33392334  | 1  |
| MSTRG. 15726. 6  | 266  | 0. 42615 | 5. 146911621 | 1  |
| MSTRG. 15723. 2  | 564  | 0. 43976 | 6. 726379395 | 1  |
| MSTRG. 15723. 3  | 344  | 0. 49227 | 5. 672424316 | 1  |
| MSTRG. 15747. 3  | 1259 | 0. 44166 | 8. 442932129 | 1  |
| MSTRG. 15750. 2  | 164  | 0. 33229 | 5. 002746582 | 1  |
| MSTRG. 15750. 3  | 752  | 0. 4006  | 7. 867248535 | 1  |
| MSTRG. 15750. 4  | 755  | 0. 44906 | 8. 021179199 | 1  |

|                 |      |         |             |   |
|-----------------|------|---------|-------------|---|
| MSTRG. 15751.5  | 317  | 0.46255 | 5.76385498  | 1 |
| MSTRG. 15751.4  | 371  | 0.47152 | 5.743347168 | 1 |
| MSTRG. 15752.3  | 160  | 0.30981 | 8.257751465 | 1 |
| MSTRG. 15752.4  | 160  | 0.30981 | 8.257751465 | 1 |
| MSTRG. 15752.5  | 160  | 0.30981 | 8.257751465 | 1 |
| MSTRG. 15754.2  | 904  | 0.41165 | 5.874450684 | 1 |
| MSTRG. 15756.4  | 296  | 0.39473 | 8.559265137 | 1 |
| MSTRG. 15766.3  | 1399 | 0.46411 | 5.791442871 | 1 |
| MSTRG. 15766.4  | 1399 | 0.46411 | 5.791442871 | 1 |
| MSTRG. 15766.10 | 1440 | 0.46719 | 5.838439941 | 1 |
| MSTRG. 15766.8  | 1399 | 0.46411 | 5.791442871 | 1 |
| MSTRG. 15766.9  | 1441 | 0.46719 | 5.838439941 | 1 |
| MSTRG. 15767.1  | 54   | 0.28475 | 5.312683105 | 1 |
| MSTRG. 15766.11 | 122  | 0.28498 | 9.624328613 | 1 |
| MSTRG. 15766.12 | 66   | 0.44441 | 9.301086426 | 1 |
| MSTRG. 15766.13 | 85   | 0.33585 | 8.866271973 | 1 |
| MSTRG. 15768.1  | 127  | 0.36766 | 11.10809326 | 1 |
| MSTRG. 15769.1  | 169  | 0.33446 | 9.250305176 | 1 |
| MSTRG. 15773.1  | 121  | 0.28584 | 11.809021   | 1 |
| MSTRG. 15773.2  | 163  | 0.28584 | 11.70501709 | 1 |
| MSTRG. 15776.1  | 190  | 0.28567 | 7.683532715 | 1 |
| MSTRG. 15776.2  | 386  | 0.37874 | 9.38482666  | 1 |
| MSTRG. 15778.3  | 89   | 0.35312 | 9.097229004 | 1 |
| MSTRG. 15778.2  | 129  | 0.34103 | 8.957824707 | 1 |
| MSTRG. 15781.1  | 49   | 0.37964 | 10.75018311 | 1 |
| MSTRG. 15781.5  | 218  | 0.39726 | 11.3057251  | 1 |
| MSTRG. 15781.7  | 79   | 0.44236 | 8.8885498   | 1 |
| MSTRG. 15782.1  | 676  | 0.36527 | 5.762512207 | 1 |
| MSTRG. 15785.1  | 71   | 0.40793 | 9.972351074 | 1 |
| MSTRG. 15786.1  | 96   | 0.32651 | 9.875915527 | 1 |
| MSTRG. 15786.2  | 39   | 0.45266 | 8.939025879 | 1 |
| MSTRG. 15786.3  | 166  | 0.41979 | 9.899353027 | 1 |
| MSTRG. 15788.1  | 96   | 0.35923 | 9.804016113 | 1 |
| MSTRG. 15791.1  | 97   | 0.39071 | 10.06817627 | 1 |
| MSTRG. 15793.1  | 190  | 0.36775 | 7.707580566 | 1 |
| MSTRG. 15795.1  | 66   | 0.40004 | 7.835998535 | 1 |
| MSTRG. 15796.1  | 2081 | 0.46743 | 7.703063965 | 1 |
| MSTRG. 15796.2  | 164  | 0.26785 | 10.0166626  | 1 |
| MSTRG. 15796.3  | 164  | 0.30864 | 10.0166626  | 1 |
| MSTRG. 15797.4  | 125  | 0.43683 | 7.675231934 | 1 |
| MSTRG. 15797.6  | 144  | 0.34435 | 6.32232666  | 1 |
| MSTRG. 15798.1  | 49   | 0.32677 | 9.626037598 | 1 |
| MSTRG. 15804.2  | 362  | 0.40485 | 5.025817871 | 1 |
| MSTRG. 15804.3  | 362  | 0.44732 | 5.025817871 | 1 |
| MSTRG. 15804.5  | 362  | 0.4068  | 5.025817871 | 1 |
| MSTRG. 15800.1  | 147  | 0.30068 | 11.48297119 | 1 |
| MSTRG. 15801.1  | 196  | 0.40215 | 5.101867676 | 1 |
| MSTRG. 15809.10 | 802  | 0.44535 | 6.563171387 | 1 |
| MSTRG. 15810.1  | 13   | 0.38173 | 9.102233887 | 1 |
| MSTRG. 15811.1  | 188  | 0.34096 | 8.894348145 | 1 |
| MSTRG. 15812.1  | 88   | 0.25541 | 7.678039551 | 1 |
| MSTRG. 15813.2  | 186  | 0.29343 | 9.11114502  | 1 |
| MSTRG. 15813.1  | 171  | 0.29343 | 9.315368652 | 1 |
| MSTRG. 15813.3  | 171  | 0.29355 | 9.315368652 | 1 |



|                  |      |          |              |    |
|------------------|------|----------|--------------|----|
| MSTRG. 15813. 4  | 171  | 0. 29607 | 9. 315368652 | 1  |
| MSTRG. 15809. 11 | 265  | 0. 33186 | 7. 63470459  | 1  |
| MSTRG. 15806. 1  | 99   | 0. 33447 | 10. 95648193 | -1 |
| MSTRG. 15807. 1  | 233  | 0. 34081 | 6. 102844238 | 1  |
| MSTRG. 15816. 1  | 60   | 0. 37562 | 6. 042297363 | 1  |
| MSTRG. 15816. 2  | 32   | 0. 38282 | 9. 302307129 | 1  |
| MSTRG. 15814. 1  | 55   | 0. 34587 | 5. 987243652 | 1  |
| MSTRG. 15817. 1  | 267  | 0. 40701 | 9. 768127441 | 1  |
| MSTRG. 15821. 1  | 35   | 0. 37457 | 4. 129821777 | 1  |
| MSTRG. 15822. 3  | 443  | 0. 40305 | 6. 45111084  | 1  |
| MSTRG. 15826. 1  | 87   | 0. 36711 | 8. 572814941 | 1  |
| MSTRG. 15832. 1  | 71   | 0. 39599 | 8. 507019043 | 1  |
| MSTRG. 15834. 1  | 53   | 0. 3689  | 8. 590637207 | 1  |
| MSTRG. 15834. 2  | 55   | 0. 40902 | 9. 036437988 | 1  |
| MSTRG. 15835. 1  | 46   | 0. 33362 | 9. 984436035 | 1  |
| MSTRG. 15835. 2  | 46   | 0. 39885 | 9. 984436035 | 1  |
| MSTRG. 15841. 1  | 703  | 0. 43288 | 6. 417541504 | 1  |
| MSTRG. 15841. 2  | 394  | 0. 43968 | 6. 623840332 | -1 |
| MSTRG. 15843. 2  | 137  | 0. 35407 | 9. 415222168 | 1  |
| MSTRG. 15846. 6  | 134  | 0. 37275 | 7. 785583496 | 1  |
| MSTRG. 15846. 5  | 134  | 0. 37281 | 7. 785583496 | 1  |
| MSTRG. 15847. 1  | 92   | 0. 37575 | 10. 2321167  | 1  |
| MSTRG. 15848. 1  | 290  | 0. 4525  | 5. 353088379 | 1  |
| MSTRG. 15848. 2  | 290  | 0. 44272 | 5. 353088379 | 1  |
| MSTRG. 15848. 3  | 290  | 0. 43251 | 5. 353088379 | 1  |
| MSTRG. 15858. 1  | 109  | 0. 29618 | 8. 815002441 | 1  |
| MSTRG. 15858. 2  | 259  | 0. 34381 | 5. 089416504 | 1  |
| MSTRG. 15858. 3  | 369  | 0. 41537 | 8. 131286621 | 1  |
| MSTRG. 15868. 1  | 1034 | 0. 4392  | 6. 370178223 | 1  |
| MSTRG. 15868. 6  | 930  | 0. 41174 | 6. 216125488 | 1  |
| MSTRG. 15868. 9  | 930  | 0. 43932 | 6. 216125488 | 1  |
| MSTRG. 15868. 7  | 930  | 0. 41174 | 6. 216125488 | 1  |
| MSTRG. 15868. 3  | 930  | 0. 41882 | 6. 216125488 | 1  |
| MSTRG. 15868. 10 | 930  | 0. 45349 | 6. 216125488 | 1  |
| MSTRG. 15867. 3  | 109  | 0. 35235 | 8. 976745605 | 1  |
| MSTRG. 15873. 2  | 432  | 0. 40259 | 4. 910095215 | 1  |
| MSTRG. 15874. 2  | 381  | 0. 4718  | 6. 639343262 | 1  |
| MSTRG. 15879. 2  | 623  | 0. 3672  | 7. 916931152 | 1  |
| MSTRG. 15886. 2  | 505  | 0. 32755 | 8. 637878418 | 1  |
| MSTRG. 15890. 1  | 48   | 0. 38057 | 10. 55731201 | -1 |
| MSTRG. 15891. 2  | 245  | 0. 42111 | 4. 683410645 | 1  |
| MSTRG. 15896. 2  | 136  | 0. 37206 | 4. 920837402 | 1  |
| MSTRG. 15902. 5  | 836  | 0. 4639  | 6. 141174316 | 1  |
| MSTRG. 15902. 3  | 890  | 0. 49745 | 6. 479919434 | 1  |
| MSTRG. 15902. 4  | 1008 | 0. 46518 | 6. 253479004 | 1  |
| MSTRG. 15902. 6  | 894  | 0. 43251 | 6. 699645996 | 1  |
| MSTRG. 15903. 1  | 39   | 0. 32365 | 9. 186584473 | 1  |
| MSTRG. 15897. 1  | 97   | 0. 37349 | 6. 506530762 | 1  |
| MSTRG. 15898. 1  | 45   | 0. 28683 | 9. 098937988 | 1  |
| MSTRG. 15899. 3  | 526  | 0. 36494 | 9. 023620605 | 1  |
| MSTRG. 15899. 2  | 363  | 0. 37405 | 8. 081604004 | 1  |
| MSTRG. 15899. 4  | 458  | 0. 42486 | 8. 565002441 | 1  |
| MSTRG. 15909. 4  | 1752 | 0. 40306 | 6. 254577637 | 1  |
| MSTRG. 15909. 1  | 1376 | 0. 45068 | 6. 76776123  | 1  |

|                  |      |          |              |    |
|------------------|------|----------|--------------|----|
| MSTRG. 15909. 6  | 1752 | 0. 43896 | 6. 254577637 | 1  |
| MSTRG. 15907. 1  | 27   | 0. 37419 | 9. 303649902 | 1  |
| MSTRG. 15917. 2  | 293  | 0. 29152 | 5. 684631348 | 1  |
| MSTRG. 15917. 3  | 223  | 0. 29152 | 10. 03424072 | 1  |
| MSTRG. 15917. 6  | 209  | 0. 30907 | 6. 56817627  | 1  |
| MSTRG. 15917. 7  | 293  | 0. 4323  | 5. 684631348 | 1  |
| MSTRG. 15917. 5  | 293  | 0. 39435 | 5. 684631348 | 1  |
| MSTRG. 15917. 8  | 293  | 0. 38536 | 5. 684631348 | 1  |
| MSTRG. 15917. 9  | 209  | 0. 36501 | 6. 56817627  | 1  |
| MSTRG. 15917. 10 | 127  | 0. 27879 | 11. 75250244 | 1  |
| MSTRG. 15914. 2  | 447  | 0. 41835 | 8. 969665527 | 1  |
| MSTRG. 15913. 1  | 84   | 0. 35649 | 7. 966125488 | 1  |
| MSTRG. 15921. 1  | 55   | 0. 37452 | 10. 45001221 | 1  |
| MSTRG. 15929. 1  | 1191 | 0. 43746 | 7. 534851074 | 1  |
| MSTRG. 15929. 4  | 1112 | 0. 45132 | 7. 553771973 | 1  |
| MSTRG. 15930. 1  | 117  | 0. 28499 | 5. 377380371 | 1  |
| MSTRG. 15929. 5  | 1048 | 0. 44995 | 6. 352600098 | 1  |
| MSTRG. 15929. 7  | 1026 | 0. 40882 | 6. 32244873  | 1  |
| MSTRG. 15929. 9  | 1048 | 0. 43137 | 6. 324157715 | 1  |
| MSTRG. 15929. 10 | 1070 | 0. 40661 | 6. 354309082 | 1  |
| MSTRG. 15929. 11 | 1057 | 0. 44428 | 6. 45513916  | 1  |
| MSTRG. 15932. 1  | 700  | 0. 37174 | 9. 071472168 | 1  |
| MSTRG. 15932. 2  | 234  | 0. 45344 | 8. 72088623  | 1  |
| MSTRG. 15931. 1  | 46   | 0. 48281 | 10. 08416748 | 1  |
| MSTRG. 15936. 2  | 129  | 0. 37195 | 8. 496643066 | 1  |
| MSTRG. 15936. 3  | 126  | 0. 32485 | 9. 016662598 | 1  |
| MSTRG. 15937. 3  | 156  | 0. 32099 | 5. 350402832 | 1  |
| MSTRG. 15935. 1  | 176  | 0. 419   | 9. 096618652 | 1  |
| MSTRG. 15940. 1  | 262  | 0. 46349 | 9. 624328613 | 1  |
| MSTRG. 15940. 4  | 190  | 0. 49163 | 8. 944763184 | 1  |
| MSTRG. 15943. 1  | 41   | 0. 38988 | 9. 486877441 | 1  |
| MSTRG. 15961. 2  | 454  | 0. 31287 | 6. 63861084  | 1  |
| MSTRG. 15962. 3  | 1001 | 0. 45968 | 5. 229675293 | 1  |
| MSTRG. 15962. 2  | 1069 | 0. 4799  | 5. 112365723 | 1  |
| MSTRG. 15962. 7  | 1001 | 0. 32453 | 5. 229675293 | 1  |
| MSTRG. 15963. 1  | 102  | 0. 28883 | 6. 879699707 | 1  |
| MSTRG. 15964. 1  | 177  | 0. 31852 | 6. 814880371 | 1  |
| MSTRG. 15952. 1  | 1006 | 0. 46759 | 6. 430114746 | 1  |
| MSTRG. 15955. 1  | 79   | 0. 3101  | 9. 035217285 | 1  |
| MSTRG. 15956. 1  | 152  | 0. 31532 | 10. 00384521 | 1  |
| MSTRG. 15957. 1  | 187  | 0. 35887 | 10. 02130127 | 1  |
| MSTRG. 15958. 1  | 64   | 0. 3327  | 7. 659484863 | 1  |
| MSTRG. 15951. 1  | 81   | 0. 43733 | 10. 87799072 | -1 |
| MSTRG. 15969. 2  | 100  | 0. 36815 | 5. 625549316 | 1  |
| MSTRG. 15969. 3  | 100  | 0. 38024 | 5. 625549316 | 1  |
| MSTRG. 15969. 4  | 100  | 0. 37838 | 5. 625549316 | 1  |
| MSTRG. 15973. 1  | 13   | 0. 25693 | 11. 69903564 | 1  |
| MSTRG. 15974. 1  | 461  | 0. 4697  | 7. 818908691 | 1  |
| MSTRG. 15974. 5  | 384  | 0. 45898 | 7. 179260254 | 1  |
| MSTRG. 15978. 5  | 346  | 0. 28584 | 5. 269470215 | 1  |
| MSTRG. 15978. 7  | 73   | 0. 36207 | 9. 381286621 | 1  |
| MSTRG. 15978. 6  | 196  | 0. 28982 | 9. 08392334  | 1  |
| MSTRG. 15979. 1  | 84   | 0. 35764 | 10. 54571533 | 1  |
| MSTRG. 15980. 1  | 65   | 0. 34059 | 10. 17254639 | 1  |

|                  |      |          |              |    |
|------------------|------|----------|--------------|----|
| MSTRG. 15981. 1  | 128  | 0. 3674  | 4. 785095215 | 1  |
| MSTRG. 15978. 8  | 104  | 0. 31512 | 9. 139709473 | 1  |
| MSTRG. 15982. 1  | 72   | 0. 41791 | 6. 571350098 | 1  |
| MSTRG. 15978. 9  | 65   | 0. 28165 | 10. 02301025 | 1  |
| MSTRG. 15976. 2  | 174  | 0. 36426 | 9. 738586426 | 1  |
| MSTRG. 15990. 4  | 710  | 0. 46265 | 5. 384338379 | 1  |
| MSTRG. 15994. 1  | 372  | 0. 42911 | 5. 360412598 | 1  |
| MSTRG. 15996. 1  | 54   | 0. 33842 | 4. 641662598 | 1  |
| MSTRG. 15997. 1  | 88   | 0. 35222 | 9. 59979248  | 1  |
| MSTRG. 15998. 4  | 486  | 0. 40383 | 8. 455627441 | 1  |
| MSTRG. 15998. 3  | 294  | 0. 42147 | 7. 688903809 | 1  |
| MSTRG. 15998. 10 | 259  | 0. 30648 | 8. 957946777 | 1  |
| MSTRG. 15998. 11 | 486  | 0. 40961 | 8. 455627441 | 1  |
| MSTRG. 15998. 9  | 486  | 0. 41713 | 8. 455627441 | 1  |
| MSTRG. 15999. 1  | 86   | 0. 42054 | 9. 690002441 | 1  |
| MSTRG. 16000. 1  | 55   | 0. 41275 | 11. 8291626  | 1  |
| MSTRG. 16003. 1  | 351  | 0. 37314 | 8. 421936035 | 1  |
| MSTRG. 16004. 1  | 120  | 0. 26101 | 8. 54864502  | 1  |
| MSTRG. 16006. 1  | 6    | 0. 33248 | 7. 999816895 | 1  |
| MSTRG. 16005. 2  | 242  | 0. 32599 | 10. 01080322 | -1 |
| MSTRG. 16012. 1  | 45   | 0. 37663 | 10. 91619873 | 1  |
| MSTRG. 16013. 2  | 1101 | 0. 45549 | 8. 089416504 | 1  |
| MSTRG. 16014. 1  | 41   | 0. 34236 | 7. 869567871 | 1  |
| MSTRG. 16015. 2  | 302  | 0. 39792 | 9. 686828613 | 1  |
| MSTRG. 16019. 1  | 499  | 0. 31285 | 7. 728942871 | 1  |
| MSTRG. 16019. 2  | 290  | 0. 32263 | 9. 046203613 | 1  |
| MSTRG. 16022. 2  | 745  | 0. 42598 | 5. 671447754 | 1  |
| MSTRG. 16027. 2  | 867  | 0. 44463 | 7. 65057373  | 1  |
| MSTRG. 16031. 2  | 537  | 0. 4512  | 5. 737487793 | 1  |
| MSTRG. 16034. 2  | 89   | 0. 33599 | 11. 25836182 | 1  |
| MSTRG. 16035. 1  | 78   | 0. 33791 | 4. 862121582 | 1  |
| MSTRG. 16039. 1  | 501  | 0. 32504 | 8. 561828613 | 1  |
| MSTRG. 16039. 2  | 418  | 0. 45263 | 8. 769348145 | 1  |
| MSTRG. 16041. 1  | 216  | 0. 48104 | 9. 019958496 | 1  |
| MSTRG. 16042. 2  | 61   | 0. 34609 | 11. 40228271 | 1  |
| MSTRG. 16042. 3  | 61   | 0. 33909 | 11. 40228271 | 1  |
| MSTRG. 16042. 4  | 61   | 0. 42345 | 11. 40228271 | 1  |
| MSTRG. 16044. 3  | 417  | 0. 35788 | 5. 932434082 | 1  |
| MSTRG. 16049. 2  | 331  | 0. 34153 | 8. 841247559 | 1  |
| MSTRG. 16050. 3  | 207  | 0. 4641  | 6. 44354248  | 1  |
| MSTRG. 16050. 4  | 151  | 0. 42983 | 9. 557556152 | 1  |
| MSTRG. 16052. 1  | 139  | 0. 27327 | 10. 44281006 | 1  |
| MSTRG. 16052. 2  | 139  | 0. 30431 | 10. 44281006 | 1  |
| MSTRG. 16052. 3  | 139  | 0. 28989 | 10. 44281006 | 1  |
| MSTRG. 16056. 1  | 189  | 0. 27987 | 10. 16693115 | 1  |
| MSTRG. 16057. 12 | 650  | 0. 44781 | 7. 530090332 | 1  |
| MSTRG. 16057. 15 | 650  | 0. 45795 | 7. 530090332 | 1  |
| MSTRG. 16057. 11 | 810  | 0. 4901  | 6. 997497559 | 1  |
| MSTRG. 16057. 14 | 829  | 0. 49134 | 7. 244445801 | 1  |
| MSTRG. 16057. 17 | 742  | 0. 44519 | 6. 48236084  | 1  |
| MSTRG. 16057. 19 | 824  | 0. 47619 | 6. 769348145 | 1  |
| MSTRG. 16057. 20 | 622  | 0. 49462 | 5. 945495605 | 1  |
| MSTRG. 16067. 2  | 453  | 0. 41306 | 5. 744934082 | 1  |
| MSTRG. 16058. 1  | 258  | 0. 3636  | 4. 312316895 | 1  |

|                  |      |          |              |    |
|------------------|------|----------|--------------|----|
| MSTRG. 16064. 2  | 323  | 0. 38767 | 4. 823669434 | 1  |
| MSTRG. 16064. 3  | 323  | 0. 43096 | 4. 823669434 | 1  |
| MSTRG. 16064. 4  | 323  | 0. 4411  | 4. 823669434 | 1  |
| MSTRG. 16064. 7  | 323  | 0. 39355 | 4. 823669434 | 1  |
| MSTRG. 16069. 2  | 337  | 0. 43885 | 5. 575500488 | 1  |
| MSTRG. 16069. 5  | 425  | 0. 41551 | 6. 083679199 | 1  |
| MSTRG. 16069. 6  | 500  | 0. 39775 | 6. 085632324 | 1  |
| MSTRG. 16069. 8  | 294  | 0. 34913 | 9. 017883301 | 1  |
| MSTRG. 16072. 1  | 148  | 0. 3935  | 11. 29034424 | -1 |
| MSTRG. 16079. 2  | 1673 | 0. 45463 | 6. 258117676 | 1  |
| MSTRG. 16079. 4  | 1479 | 0. 48808 | 6. 303771973 | 1  |
| MSTRG. 16074. 1  | 593  | 0. 44214 | 5. 510192871 | 1  |
| MSTRG. 16074. 3  | 239  | 0. 3598  | 9. 355041504 | 1  |
| MSTRG. 16081. 1  | 583  | 0. 44218 | 7. 299255371 | 1  |
| MSTRG. 16082. 2  | 324  | 0. 39944 | 5. 948059082 | 1  |
| MSTRG. 16082. 3  | 289  | 0. 38652 | 6. 662658691 | 1  |
| MSTRG. 16082. 4  | 161  | 0. 32961 | 8. 31817627  | 1  |
| MSTRG. 16076. 2  | 348  | 0. 39798 | 6. 258117676 | 1  |
| MSTRG. 16083. 1  | 106  | 0. 28491 | 8. 74029541  | 1  |
| MSTRG. 16083. 2  | 105  | 0. 28662 | 9. 808410645 | 1  |
| MSTRG. 16083. 3  | 76   | 0. 35756 | 8. 479431152 | 1  |
| MSTRG. 16088. 2  | 223  | 0. 34395 | 6. 224182129 | 1  |
| MSTRG. 16088. 4  | 135  | 0. 35679 | 5. 523254395 | 1  |
| MSTRG. 16085. 1  | 421  | 0. 41805 | 5. 590026855 | 1  |
| MSTRG. 16092. 3  | 912  | 0. 41285 | 5. 757995605 | 1  |
| MSTRG. 16093. 3  | 275  | 0. 33623 | 9. 975280762 | 1  |
| MSTRG. 16104. 1  | 696  | 0. 34331 | 9. 386169434 | 1  |
| MSTRG. 16104. 4  | 696  | 0. 34331 | 9. 386169434 | 1  |
| MSTRG. 16104. 5  | 896  | 0. 38057 | 9. 082214355 | 1  |
| MSTRG. 16102. 1  | 269  | 0. 36588 | 5. 984069824 | 1  |
| MSTRG. 16109. 4  | 2071 | 0. 43417 | 8. 158630371 | 1  |
| MSTRG. 16110. 1  | 61   | 0. 32619 | 8. 636047363 | 1  |
| MSTRG. 16113. 5  | 1948 | 0. 36127 | 7. 250671387 | 1  |
| MSTRG. 16113. 6  | 1946 | 0. 38059 | 7. 250671387 | 1  |
| MSTRG. 16113. 8  | 1945 | 0. 38059 | 7. 24798584  | 1  |
| MSTRG. 16113. 7  | 2225 | 0. 35274 | 8. 455993652 | 1  |
| MSTRG. 16113. 9  | 1667 | 0. 38363 | 6. 252990723 | 1  |
| MSTRG. 16113. 11 | 1536 | 0. 33785 | 6. 732116699 | 1  |
| MSTRG. 16113. 12 | 615  | 0. 35182 | 5. 938781738 | 1  |
| MSTRG. 16113. 13 | 775  | 0. 32412 | 6. 026428223 | 1  |
| MSTRG. 16113. 14 | 552  | 0. 31639 | 5. 641296387 | 1  |
| MSTRG. 16117. 2  | 1146 | 0. 47676 | 5. 811950684 | 1  |
| MSTRG. 16117. 3  | 401  | 0. 42449 | 6. 540588379 | 1  |
| MSTRG. 16118. 1  | 75   | 0. 35733 | 10. 01971436 | 1  |
| MSTRG. 16123. 1  | 130  | 0. 32436 | 9. 483215332 | 1  |
| MSTRG. 16128. 1  | 2683 | 0. 42094 | 7. 926940918 | 1  |
| MSTRG. 16128. 5  | 2662 | 0. 42778 | 7. 773376465 | 1  |
| MSTRG. 16128. 6  | 2647 | 0. 43987 | 7. 934509277 | 1  |
| MSTRG. 16129. 1  | 254  | 0. 36854 | 8. 834533691 | 1  |
| MSTRG. 16129. 2  | 240  | 0. 31209 | 8. 973815918 | 1  |
| MSTRG. 16129. 3  | 125  | 0. 31849 | 9. 301330566 | 1  |
| MSTRG. 16132. 2  | 706  | 0. 4663  | 9. 719543457 | 1  |
| MSTRG. 16132. 3  | 584  | 0. 45841 | 9. 246887207 | 1  |
| MSTRG. 16133. 1  | 112  | 0. 28002 | 5. 311462402 | 1  |

|                 |      |          |              |    |
|-----------------|------|----------|--------------|----|
| MSTRG. 16133. 2 | 672  | 0. 38809 | 6. 885681152 | 1  |
| MSTRG. 16133. 4 | 727  | 0. 32076 | 6. 288757324 | 1  |
| MSTRG. 16136. 1 | 516  | 0. 46366 | 6. 68927002  | 1  |
| MSTRG. 16136. 2 | 450  | 0. 41941 | 6. 61541748  | 1  |
| MSTRG. 16138. 2 | 1021 | 0. 31371 | 6. 017883301 | 1  |
| MSTRG. 16138. 5 | 880  | 0. 31371 | 6. 183776855 | 1  |
| MSTRG. 16138. 6 | 1021 | 0. 4621  | 6. 017883301 | 1  |
| MSTRG. 16144. 1 | 92   | 0. 32431 | 10. 00054932 | 1  |
| MSTRG. 16144. 4 | 247  | 0. 43741 | 8. 764953613 | 1  |
| MSTRG. 16148. 2 | 1563 | 0. 442   | 6. 36920166  | 1  |
| MSTRG. 16148. 5 | 1563 | 0. 42896 | 6. 36920166  | 1  |
| MSTRG. 16149. 1 | 81   | 0. 28063 | 9. 566955566 | 1  |
| MSTRG. 16159. 1 | 996  | 0. 40076 | 10. 05169678 | 1  |
| MSTRG. 16159. 2 | 956  | 0. 42434 | 9. 825378418 | 1  |
| MSTRG. 16159. 3 | 895  | 0. 40596 | 9. 874084473 | 1  |
| MSTRG. 16159. 4 | 858  | 0. 40596 | 10. 13214111 | 1  |
| MSTRG. 16159. 5 | 935  | 0. 36801 | 10. 10443115 | 1  |
| MSTRG. 16162. 1 | 169  | 0. 28227 | 9. 613830566 | 1  |
| MSTRG. 16163. 5 | 1343 | 0. 41764 | 6. 74029541  | 1  |
| MSTRG. 16167. 2 | 376  | 0. 44192 | 5. 97467041  | 1  |
| MSTRG. 16170. 5 | 2328 | 0. 41335 | 5. 364929199 | 1  |
| MSTRG. 16174. 2 | 175  | 0. 36018 | 7. 734802246 | 1  |
| MSTRG. 16191. 3 | 599  | 0. 43563 | 5. 39251709  | 1  |
| MSTRG. 16191. 4 | 599  | 0. 44026 | 5. 39251709  | 1  |
| MSTRG. 16191. 5 | 477  | 0. 42231 | 5. 153991699 | 1  |
| MSTRG. 16182. 2 | 295  | 0. 35412 | 10. 6630249  | 1  |
| MSTRG. 16196. 2 | 839  | 0. 44749 | 6. 382141113 | 1  |
| MSTRG. 16198. 1 | 722  | 0. 45962 | 9. 398986816 | 1  |
| MSTRG. 16198. 2 | 722  | 0. 4559  | 9. 398986816 | 1  |
| MSTRG. 16199. 1 | 139  | 0. 31181 | 11. 51580811 | -1 |
| MSTRG. 16195. 3 | 334  | 0. 46549 | 8. 540100098 | 1  |
| MSTRG. 16201. 2 | 439  | 0. 35475 | 7. 916931152 | 1  |
| MSTRG. 16201. 3 | 439  | 0. 34487 | 7. 916931152 | 1  |
| MSTRG. 16201. 6 | 439  | 0. 34487 | 7. 916931152 | 1  |
| MSTRG. 16202. 1 | 303  | 0. 23179 | 8. 297790527 | 1  |
| MSTRG. 16201. 7 | 365  | 0. 3244  | 7. 906433105 | 1  |
| MSTRG. 16203. 1 | 402  | 0. 44072 | 6. 646179199 | 1  |
| MSTRG. 16207. 1 | 133  | 0. 30317 | 11. 50152588 | 1  |
| MSTRG. 16210. 2 | 182  | 0. 35871 | 9. 229064941 | 1  |
| MSTRG. 16211. 1 | 203  | 0. 33986 | 8. 781799316 | 1  |
| MSTRG. 16214. 2 | 91   | 0. 36993 | 11. 04595947 | 1  |
| MSTRG. 16214. 3 | 80   | 0. 37576 | 7. 795837402 | 1  |
| MSTRG. 16215. 1 | 70   | 0. 40558 | 5. 077331543 | 1  |
| MSTRG. 16217. 1 | 975  | 0. 3054  | 9. 457336426 | 1  |
| MSTRG. 16218. 3 | 516  | 0. 3808  | 7. 436828613 | 1  |
| MSTRG. 16218. 4 | 516  | 0. 38388 | 7. 436828613 | 1  |
| MSTRG. 16221. 4 | 565  | 0. 41878 | 5. 641906738 | 1  |
| MSTRG. 16221. 3 | 313  | 0. 3565  | 5. 881408691 | 1  |
| MSTRG. 16222. 1 | 250  | 0. 29145 | 11. 44561768 | 1  |
| MSTRG. 16222. 3 | 169  | 0. 34609 | 10. 22113037 | 1  |
| MSTRG. 16219. 1 | 75   | 0. 30919 | 7. 002258301 | 1  |
| MSTRG. 16226. 5 | 80   | 0. 28953 | 6. 170837402 | 1  |
| MSTRG. 16239. 3 | 592  | 0. 46111 | 9. 296569824 | 1  |
| MSTRG. 16239. 4 | 599  | 0. 46882 | 9. 535461426 | 1  |

|                  |      |          |              |    |
|------------------|------|----------|--------------|----|
| MSTRG. 16244. 1  | 259  | 0. 41808 | 6. 259338379 | 1  |
| MSTRG. 16244. 3  | 402  | 0. 44088 | 8. 313903809 | 1  |
| MSTRG. 16244. 5  | 573  | 0. 39187 | 9. 335876465 | 1  |
| MSTRG. 16242. 7  | 30   | 0. 35245 | 5. 999572754 | 1  |
| MSTRG. 16233. 1  | 328  | 0. 32989 | 10. 38787842 | 1  |
| MSTRG. 16233. 2  | 62   | 0. 37648 | 4. 418273926 | 1  |
| MSTRG. 16248. 2  | 528  | 0. 43702 | 6. 29107666  | 1  |
| MSTRG. 16248. 3  | 528  | 0. 43702 | 6. 29107666  | 1  |
| MSTRG. 16237. 1  | 36   | 0. 31947 | 11. 53900146 | 1  |
| MSTRG. 16252. 3  | 320  | 0. 4314  | 9. 261169434 | 1  |
| MSTRG. 16252. 4  | 320  | 0. 41444 | 9. 261169434 | 1  |
| MSTRG. 16252. 1  | 320  | 0. 40102 | 9. 261169434 | 1  |
| MSTRG. 16253. 2  | 141  | 0. 2728  | 11. 66802979 | 1  |
| MSTRG. 16253. 6  | 208  | 0. 40648 | 9. 535095215 | 1  |
| MSTRG. 16253. 7  | 138  | 0. 32646 | 11. 82879639 | 1  |
| MSTRG. 16254. 1  | 475  | 0. 40196 | 6. 295349121 | 1  |
| MSTRG. 16261. 2  | 1323 | 0. 45212 | 7. 35369873  | 1  |
| MSTRG. 16261. 6  | 1295 | 0. 45238 | 7. 342834473 | 1  |
| MSTRG. 16261. 5  | 1323 | 0. 44112 | 7. 35369873  | 1  |
| MSTRG. 16263. 5  | 367  | 0. 45385 | 5. 26751709  | 1  |
| MSTRG. 16263. 3  | 233  | 0. 3995  | 4. 969421387 | 1  |
| MSTRG. 16263. 4  | 233  | 0. 45143 | 4. 969421387 | 1  |
| MSTRG. 16263. 2  | 367  | 0. 31108 | 5. 26751709  | 1  |
| MSTRG. 16258. 1  | 79   | 0. 29099 | 6. 475402832 | 1  |
| MSTRG. 16258. 2  | 79   | 0. 31969 | 6. 475402832 | 1  |
| MSTRG. 16264. 6  | 829  | 0. 37335 | 5. 973815918 | 1  |
| MSTRG. 16265. 1  | 100  | 0. 29179 | 7. 610412598 | -1 |
| MSTRG. 16264. 10 | 821  | 0. 33713 | 6. 073669434 | 1  |
| MSTRG. 16264. 9  | 1246 | 0. 46409 | 5. 637512207 | 1  |
| MSTRG. 16264. 11 | 60   | 0. 40035 | 11. 62371826 | 1  |
| MSTRG. 16269. 1  | 120  | 0. 28039 | 9. 128479004 | 1  |
| MSTRG. 16269. 2  | 120  | 0. 32509 | 9. 128479004 | 1  |
| MSTRG. 16269. 3  | 120  | 0. 28907 | 9. 128479004 | 1  |
| MSTRG. 16270. 1  | 563  | 0. 42236 | 9. 798156738 | 1  |
| MSTRG. 16270. 2  | 563  | 0. 4085  | 9. 798156738 | 1  |
| MSTRG. 16270. 3  | 563  | 0. 40631 | 9. 798156738 | 1  |
| MSTRG. 16273. 1  | 32   | 0. 32089 | 6. 511901855 | 1  |
| MSTRG. 16274. 2  | 467  | 0. 42685 | 9. 150695801 | 1  |
| MSTRG. 16275. 1  | 78   | 0. 42642 | 10. 01641846 | -1 |
| MSTRG. 16276. 1  | 135  | 0. 34642 | 10. 4151001  | 1  |
| MSTRG. 16278. 2  | 148  | 0. 32823 | 9. 204162598 | 1  |
| MSTRG. 16284. 1  | 54   | 0. 37111 | 10. 54864502 | -1 |
| MSTRG. 16288. 1  | 225  | 0. 39604 | 9. 920959473 | 1  |
| MSTRG. 16291. 1  | 126  | 0. 34295 | 8. 601867676 | 1  |
| MSTRG. 16296. 1  | 53   | 0. 31985 | 9. 591125488 | 1  |
| MSTRG. 16299. 1  | 69   | 0. 3679  | 9. 39666748  | -1 |
| MSTRG. 16299. 2  | 76   | 0. 37932 | 9. 69342041  | 1  |
| MSTRG. 16302. 1  | 56   | 0. 38721 | 6. 49017334  | 1  |
| MSTRG. 16307. 1  | 56   | 0. 36208 | 5. 667785645 | 1  |
| MSTRG. 16319. 2  | 178  | 0. 28165 | 6. 20513916  | 1  |
| MSTRG. 16319. 3  | 338  | 0. 29751 | 5. 606872559 | 1  |
| MSTRG. 16319. 4  | 337  | 0. 32906 | 5. 606872559 | 1  |
| MSTRG. 16319. 5  | 337  | 0. 30092 | 5. 606872559 | 1  |
| MSTRG. 16319. 6  | 337  | 0. 29387 | 5. 606872559 | 1  |

|                  |      |          |              |    |
|------------------|------|----------|--------------|----|
| MSTRG. 16320. 2  | 144  | 0. 2782  | 9. 961975098 | 1  |
| MSTRG. 16321. 1  | 614  | 0. 46362 | 5. 073303223 | 1  |
| MSTRG. 16326. 1  | 592  | 0. 40569 | 7. 776550293 | 1  |
| MSTRG. 16327. 1  | 447  | 0. 46039 | 8. 999694824 | 1  |
| MSTRG. 16328. 1  | 84   | 0. 37685 | 11. 00006104 | 1  |
| MSTRG. 16329. 3  | 818  | 0. 41013 | 7. 762023926 | 1  |
| MSTRG. 16329. 4  | 74   | 0. 3058  | 6. 547424316 | 1  |
| MSTRG. 16330. 2  | 1899 | 0. 3965  | 6. 52130127  | 1  |
| MSTRG. 16332. 1  | 994  | 0. 44249 | 5. 818054199 | 1  |
| MSTRG. 16334. 5  | 1877 | 0. 47866 | 5. 168762207 | 1  |
| MSTRG. 16336. 1  | 56   | 0. 43939 | 9. 624694824 | -1 |
| MSTRG. 16337. 1  | 100  | 0. 38587 | 10. 16778564 | 1  |
| MSTRG. 16339. 2  | 85   | 0. 3331  | 9. 031799316 | 1  |
| MSTRG. 16349. 1  | 80   | 0. 32797 | 9. 490661621 | 1  |
| MSTRG. 16345. 2  | 100  | 0. 2785  | 9. 690002441 | 1  |
| MSTRG. 16345. 3  | 100  | 0. 3072  | 9. 690002441 | 1  |
| MSTRG. 16343. 1  | 44   | 0. 34141 | 11. 32427979 | 1  |
| MSTRG. 16340. 1  | 35   | 0. 42952 | 11. 45159912 | 1  |
| MSTRG. 16351. 1  | 65   | 0. 32597 | 10. 61419678 | 1  |
| MSTRG. 16351. 2  | 53   | 0. 36881 | 10. 29205322 | 1  |
| MSTRG. 16352. 4  | 90   | 0. 29236 | 9. 62677002  | 1  |
| MSTRG. 16353. 1  | 76   | 0. 27433 | 6. 510559082 | 1  |
| MSTRG. 16354. 1  | 55   | 0. 244   | 8. 023742676 | 1  |
| MSTRG. 16358. 2  | 495  | 0. 44741 | 9. 483093262 | 1  |
| MSTRG. 16358. 3  | 497  | 0. 51011 | 9. 161437988 | 1  |
| MSTRG. 16361. 2  | 149  | 0. 34706 | 8. 367736816 | 1  |
| MSTRG. 16361. 1  | 249  | 0. 35409 | 9. 241882324 | 1  |
| MSTRG. 16361. 3  | 220  | 0. 39142 | 9. 384460449 | 1  |
| MSTRG. 16361. 5  | 216  | 0. 45249 | 9. 248840332 | 1  |
| MSTRG. 16361. 6  | 208  | 0. 31793 | 10. 71783447 | 1  |
| MSTRG. 16361. 7  | 208  | 0. 3756  | 10. 16131592 | 1  |
| MSTRG. 16364. 2  | 701  | 0. 39276 | 6. 032653809 | 1  |
| MSTRG. 16366. 1  | 258  | 0. 46288 | 6. 684020996 | 1  |
| MSTRG. 16369. 4  | 298  | 0. 27151 | 9. 45135498  | 1  |
| MSTRG. 16370. 1  | 107  | 0. 32081 | 5. 065246582 | 1  |
| MSTRG. 16370. 2  | 208  | 0. 29657 | 9. 954528809 | 1  |
| MSTRG. 16375. 3  | 282  | 0. 43941 | 6. 49810791  | 1  |
| MSTRG. 16378. 1  | 58   | 0. 36519 | 5. 464538574 | 1  |
| MSTRG. 16388. 1  | 77   | 0. 34696 | 10. 29888916 | 1  |
| MSTRG. 16389. 1  | 85   | 0. 29387 | 9. 131530762 | 1  |
| MSTRG. 16389. 2  | 80   | 0. 37031 | 9. 466369629 | 1  |
| MSTRG. 16388. 2  | 48   | 0. 36206 | 9. 035461426 | 1  |
| MSTRG. 16397. 3  | 346  | 0. 31674 | 9. 223693848 | 1  |
| MSTRG. 16399. 2  | 224  | 0. 3652  | 5. 19744873  | 1  |
| MSTRG. 16410. 1  | 37   | 0. 37246 | 10. 01495361 | 1  |
| MSTRG. 16418. 1  | 88   | 0. 3908  | 11. 80096436 | 1  |
| MSTRG. 16419. 6  | 167  | 0. 41987 | 10. 35162354 | 1  |
| MSTRG. 16419. 5  | 477  | 0. 45016 | 5. 857727051 | 1  |
| MSTRG. 16419. 7  | 1134 | 0. 43497 | 6. 604309082 | 1  |
| MSTRG. 16419. 8  | 777  | 0. 43962 | 6. 820495605 | 1  |
| MSTRG. 16419. 10 | 1121 | 0. 45045 | 6. 526916504 | 1  |
| MSTRG. 16422. 1  | 334  | 0. 47636 | 7. 096618652 | 1  |
| MSTRG. 16422. 2  | 334  | 0. 45471 | 7. 096618652 | 1  |
| MSTRG. 16422. 3  | 334  | 0. 47071 | 7. 096618652 | 1  |

|                  |      |          |              |    |
|------------------|------|----------|--------------|----|
| MSTRG. 16422. 6  | 334  | 0. 47693 | 7. 096618652 | 1  |
| MSTRG. 16423. 4  | 402  | 0. 34787 | 9. 026550293 | 1  |
| MSTRG. 16423. 2  | 511  | 0. 4116  | 8. 065979004 | 1  |
| MSTRG. 16423. 3  | 291  | 0. 38054 | 6. 716247559 | 1  |
| MSTRG. 16423. 5  | 321  | 0. 29283 | 8. 657897949 | 1  |
| MSTRG. 16423. 7  | 688  | 0. 44251 | 7. 40423584  | 1  |
| MSTRG. 16423. 8  | 511  | 0. 41054 | 8. 065979004 | 1  |
| MSTRG. 16423. 10 | 201  | 0. 33775 | 9. 914367676 | 1  |
| MSTRG. 16423. 12 | 126  | 0. 33856 | 4. 740905762 | 1  |
| MSTRG. 16425. 2  | 67   | 0. 29607 | 5. 785217285 | 1  |
| MSTRG. 16425. 1  | 486  | 0. 32921 | 6. 117126465 | 1  |
| MSTRG. 16425. 3  | 531  | 0. 28739 | 6. 082824707 | 1  |
| MSTRG. 16425. 9  | 531  | 0. 40572 | 6. 082824707 | 1  |
| MSTRG. 16425. 10 | 531  | 0. 42352 | 6. 082824707 | 1  |
| MSTRG. 16427. 1  | 123  | 0. 45932 | 9. 06072998  | -1 |
| MSTRG. 16417. 1  | 74   | 0. 41464 | 11. 92144775 | 1  |
| MSTRG. 16429. 2  | 28   | 0. 29587 | 4. 242858887 | 1  |
| MSTRG. 16431. 3  | 407  | 0. 44069 | 5. 534851074 | 1  |
| MSTRG. 16431. 4  | 407  | 0. 44385 | 5. 534851074 | 1  |
| MSTRG. 16470. 1  | 450  | 0. 29308 | 9. 182556152 | 1  |
| MSTRG. 16472. 1  | 104  | 0. 31546 | 9. 510681152 | 1  |
| MSTRG. 16473. 2  | 35   | 0. 35025 | 5. 573669434 | 1  |
| MSTRG. 16446. 1  | 32   | 0. 35261 | 9. 78326416  | 1  |
| MSTRG. 16448. 5  | 128  | 0. 35845 | 8. 679138184 | 1  |
| MSTRG. 16448. 6  | 49   | 0. 39172 | 4. 897644043 | 1  |
| MSTRG. 16448. 2  | 400  | 0. 43206 | 6. 432067871 | 1  |
| MSTRG. 16448. 4  | 400  | 0. 39349 | 6. 432067871 | 1  |
| MSTRG. 16448. 8  | 158  | 0. 27911 | 6. 18572998  | 1  |
| MSTRG. 16448. 9  | 176  | 0. 3072  | 6. 738830566 | 1  |
| MSTRG. 16452. 3  | 1372 | 0. 45859 | 6. 355041504 | 1  |
| MSTRG. 16452. 5  | 1417 | 0. 4727  | 6. 355529785 | 1  |
| MSTRG. 16452. 6  | 1417 | 0. 45859 | 6. 355529785 | 1  |
| MSTRG. 16453. 2  | 335  | 0. 39079 | 5. 948425293 | 1  |
| MSTRG. 16457. 1  | 386  | 0. 40643 | 6. 745300293 | 1  |
| MSTRG. 16461. 2  | 277  | 0. 47123 | 8. 350891113 | 1  |
| MSTRG. 16463. 2  | 604  | 0. 4125  | 6. 571228027 | 1  |
| MSTRG. 16463. 3  | 465  | 0. 33311 | 8. 233093262 | 1  |
| MSTRG. 16463. 4  | 465  | 0. 33869 | 8. 233093262 | 1  |
| MSTRG. 16464. 1  | 84   | 0. 28883 | 9. 17779541  | 1  |
| MSTRG. 16465. 1  | 43   | 0. 33322 | 5. 380432129 | 1  |
| MSTRG. 16482. 1  | 23   | 0. 40187 | 10. 17108154 | 1  |
| MSTRG. 16484. 1  | 657  | 0. 46508 | 5. 662658691 | 1  |
| MSTRG. 16486. 2  | 316  | 0. 36954 | 5. 587585449 | 1  |
| MSTRG. 16486. 3  | 152  | 0. 34556 | 5. 690246582 | 1  |
| MSTRG. 16491. 1  | 154  | 0. 45071 | 4. 948547363 | 1  |
| MSTRG. 16492. 1  | 67   | 0. 3788  | 4. 64642334  | 1  |
| MSTRG. 16492. 2  | 308  | 0. 46362 | 5. 591003418 | 1  |
| MSTRG. 16498. 7  | 856  | 0. 4572  | 8. 892272949 | 1  |
| MSTRG. 16498. 8  | 864  | 0. 4572  | 8. 785095215 | 1  |
| MSTRG. 16498. 13 | 818  | 0. 45133 | 8. 418518066 | 1  |
| MSTRG. 16498. 14 | 865  | 0. 45443 | 8. 785095215 | 1  |
| MSTRG. 16498. 15 | 736  | 0. 46256 | 8. 819885254 | 1  |
| MSTRG. 16498. 16 | 111  | 0. 35946 | 9. 99395752  | 1  |
| MSTRG. 16502. 2  | 57   | 0. 46791 | 9. 873718262 | 1  |



|                 |      |          |              |    |
|-----------------|------|----------|--------------|----|
| MSTRG. 16507. 1 | 52   | 0. 48943 | 4. 885681152 | 1  |
| MSTRG. 16511. 1 | 421  | 0. 38782 | 5. 72857666  | 1  |
| MSTRG. 16511. 2 | 421  | 0. 417   | 5. 72857666  | 1  |
| MSTRG. 16511. 7 | 421  | 0. 44143 | 5. 72857666  | 1  |
| MSTRG. 16514. 1 | 668  | 0. 48375 | 5. 674377441 | 1  |
| MSTRG. 16514. 2 | 693  | 0. 47914 | 5. 683166504 | 1  |
| MSTRG. 16515. 3 | 360  | 0. 43384 | 9. 073791504 | 1  |
| MSTRG. 16539. 4 | 843  | 0. 40713 | 5. 828186035 | 1  |
| MSTRG. 16539. 5 | 739  | 0. 41178 | 5. 975524902 | 1  |
| MSTRG. 16539. 2 | 2398 | 0. 47684 | 5. 703063965 | 1  |
| MSTRG. 16539. 6 | 2468 | 0. 46117 | 5. 742248535 | 1  |
| MSTRG. 16539. 7 | 1624 | 0. 44784 | 5. 721618652 | 1  |
| MSTRG. 16542. 1 | 91   | 0. 36115 | 9. 512023926 | 1  |
| MSTRG. 16539. 8 | 1307 | 0. 45765 | 5. 60369873  | 1  |
| MSTRG. 16565. 1 | 63   | 0. 34516 | 8. 770080566 | 1  |
| MSTRG. 16584. 1 | 47   | 0. 40988 | 4. 948303223 | 1  |
| MSTRG. 16584. 2 | 53   | 0. 32167 | 10. 31939697 | 1  |
| MSTRG. 16516. 1 | 356  | 0. 47727 | 8. 558898926 | 1  |
| MSTRG. 16520. 1 | 67   | 0. 35395 | 6. 13104248  | 1  |
| MSTRG. 16535. 6 | 241  | 0. 44689 | 6. 387756348 | 1  |
| MSTRG. 16535. 7 | 77   | 0. 30981 | 9. 620544434 | 1  |
| MSTRG. 16537. 1 | 94   | 0. 29615 | 9. 761779785 | 1  |
| MSTRG. 16590. 2 | 673  | 0. 36762 | 5. 634338379 | 1  |
| MSTRG. 16590. 4 | 573  | 0. 35982 | 5. 232849121 | 1  |
| MSTRG. 16590. 3 | 673  | 0. 38148 | 5. 634338379 | 1  |
| MSTRG. 16590. 6 | 99   | 0. 29595 | 9. 694763184 | 1  |
| MSTRG. 16597. 2 | 2969 | 0. 45649 | 5. 585876465 | 1  |
| MSTRG. 16597. 3 | 274  | 0. 46824 | 4. 922912598 | 1  |
| MSTRG. 16597. 4 | 86   | 0. 4412  | 9. 68157959  | -1 |
| MSTRG. 16597. 5 | 18   | 0. 34907 | 4. 677062988 | 1  |
| MSTRG. 16597. 6 | 23   | 0. 34971 | 5. 557922363 | 1  |
| MSTRG. 16613. 1 | 59   | 0. 35825 | 9. 296813965 | 1  |
| MSTRG. 16616. 1 | 150  | 0. 2908  | 9. 535949707 | 1  |
| MSTRG. 16616. 2 | 150  | 0. 27415 | 9. 535949707 | 1  |
| MSTRG. 16616. 3 | 290  | 0. 2782  | 9. 02947998  | 1  |
| MSTRG. 16619. 1 | 76   | 0. 27415 | 6. 249572754 | 1  |
| MSTRG. 16620. 1 | 160  | 0. 28267 | 8. 20526123  | 1  |
| MSTRG. 16616. 5 | 192  | 0. 42788 | 5. 114196777 | -1 |
| MSTRG. 16616. 6 | 192  | 0. 39544 | 5. 114196777 | -1 |
| MSTRG. 16616. 7 | 189  | 0. 35053 | 5. 114196777 | -1 |
| MSTRG. 16616. 8 | 189  | 0. 31261 | 5. 114196777 | -1 |
| MSTRG. 16620. 2 | 217  | 0. 28584 | 9. 332580566 | 1  |
| MSTRG. 16620. 3 | 148  | 0. 28063 | 5. 880310059 | 1  |
| MSTRG. 16620. 4 | 148  | 0. 27911 | 5. 880310059 | 1  |
| MSTRG. 16620. 5 | 160  | 0. 28419 | 8. 20526123  | 1  |
| MSTRG. 16620. 6 | 160  | 0. 28186 | 8. 20526123  | 1  |
| MSTRG. 16622. 1 | 98   | 0. 28415 | 10. 30999756 | 1  |
| MSTRG. 16587. 1 | 83   | 0. 37871 | 7. 999084473 | 1  |
| MSTRG. 16601. 1 | 67   | 0. 32839 | 6. 006164551 | 1  |
| MSTRG. 16602. 1 | 161  | 0. 29526 | 8. 289001465 | 1  |
| MSTRG. 16603. 3 | 128  | 0. 3283  | 9. 342956543 | 1  |
| MSTRG. 16603. 4 | 336  | 0. 4248  | 9. 112243652 | 1  |
| MSTRG. 16604. 2 | 176  | 0. 38993 | 9. 028137207 | 1  |
| MSTRG. 16629. 2 | 215  | 0. 43655 | 5. 620666504 | 1  |

|                  |      |          |              |    |
|------------------|------|----------|--------------|----|
| MSTRG. 16629. 3  | 215  | 0. 4052  | 5. 620666504 | 1  |
| MSTRG. 16630. 1  | 94   | 0. 30981 | 9. 764709473 | 1  |
| MSTRG. 16631. 3  | 136  | 0. 28267 | 9. 844665527 | 1  |
| MSTRG. 16629. 4  | 215  | 0. 41613 | 5. 620666504 | 1  |
| MSTRG. 16629. 5  | 215  | 0. 35562 | 5. 620666504 | 1  |
| MSTRG. 16632. 1  | 53   | 0. 403   | 11. 00860596 | -1 |
| MSTRG. 16642. 1  | 629  | 0. 38809 | 6. 216247559 | 1  |
| MSTRG. 16642. 2  | 382  | 0. 35833 | 5. 455383301 | 1  |
| MSTRG. 16644. 1  | 351  | 0. 36174 | 5. 39276123  | 1  |
| MSTRG. 16645. 2  | 168  | 0. 38475 | 6. 30291748  | 1  |
| MSTRG. 16653. 5  | 816  | 0. 48918 | 8. 620788574 | -1 |
| MSTRG. 16653. 6  | 797  | 0. 48918 | 8. 56048584  | -1 |
| MSTRG. 16653. 7  | 877  | 0. 46441 | 9. 023986816 | 1  |
| MSTRG. 16653. 8  | 823  | 0. 46749 | 8. 65838623  | 1  |
| MSTRG. 16653. 9  | 659  | 0. 41696 | 9. 015930176 | 1  |
| MSTRG. 16653. 10 | 365  | 0. 36805 | 9. 33782959  | 1  |
| MSTRG. 16654. 1  | 93   | 0. 27433 | 6. 374938965 | 1  |
| MSTRG. 16652. 1  | 682  | 0. 37825 | 6. 142883301 | 1  |
| MSTRG. 16660. 1  | 338  | 0. 31313 | 9. 520080566 | 1  |
| MSTRG. 16660. 3  | 205  | 0. 31065 | 9. 936462402 | 1  |
| MSTRG. 16660. 4  | 151  | 0. 30117 | 10. 12249756 | 1  |
| MSTRG. 16660. 5  | 151  | 0. 3991  | 10. 12249756 | 1  |
| MSTRG. 16665. 3  | 249  | 0. 32642 | 5. 305847168 | 1  |
| MSTRG. 16665. 4  | 249  | 0. 35657 | 5. 305847168 | 1  |
| MSTRG. 16671. 5  | 48   | 0. 40645 | 9. 056091309 | 1  |
| MSTRG. 16672. 2  | 667  | 0. 37484 | 8. 721618652 | 1  |
| MSTRG. 16672. 5  | 669  | 0. 36954 | 8. 50579834  | 1  |
| MSTRG. 16672. 7  | 667  | 0. 39889 | 8. 721618652 | 1  |
| MSTRG. 16669. 1  | 57   | 0. 292   | 6. 10760498  | 1  |
| MSTRG. 16669. 2  | 47   | 0. 27991 | 8. 95904541  | 1  |
| MSTRG. 16670. 1  | 1171 | 0. 47045 | 6. 661071777 | 1  |
| MSTRG. 16674. 1  | 138  | 0. 30882 | 10. 17364502 | 1  |
| MSTRG. 16676. 1  | 385  | 0. 45158 | 8. 873352051 | 1  |
| MSTRG. 16676. 3  | 325  | 0. 35889 | 9. 708312988 | 1  |
| MSTRG. 16677. 4  | 445  | 0. 36909 | 9. 247253418 | 1  |
| MSTRG. 16677. 3  | 604  | 0. 36992 | 8. 482971191 | 1  |
| MSTRG. 16678. 1  | 26   | 0. 32879 | 5. 706726074 | 1  |
| MSTRG. 16679. 2  | 120  | 0. 28842 | 9. 500427246 | 1  |
| MSTRG. 16679. 1  | 128  | 0. 4232  | 11. 46002197 | 1  |
| MSTRG. 16679. 3  | 120  | 0. 28842 | 9. 500427246 | 1  |
| MSTRG. 16679. 4  | 43   | 0. 38596 | 9. 961608887 | 1  |
| MSTRG. 16679. 5  | 43   | 0. 28567 | 9. 961608887 | 1  |
| MSTRG. 16685. 2  | 492  | 0. 37193 | 8. 616882324 | 1  |
| MSTRG. 16687. 1  | 139  | 0. 31277 | 11. 46185303 | 1  |
| MSTRG. 16684. 1  | 78   | 0. 45561 | 5. 507263184 | 1  |
| MSTRG. 16691. 1  | 126  | 0. 35735 | 11. 65924072 | 1  |
| MSTRG. 16694. 5  | 114  | 0. 27327 | 9. 976379395 | 1  |
| MSTRG. 16692. 1  | 67   | 0. 4262  | 8. 787658691 | -1 |
| MSTRG. 16693. 1  | 68   | 0. 3762  | 12. 30206299 | -1 |
| MSTRG. 16702. 1  | 130  | 0. 31388 | 9. 115905762 | 1  |
| MSTRG. 16702. 4  | 119  | 0. 29857 | 11. 12677002 | 1  |
| MSTRG. 16702. 5  | 35   | 0. 3372  | 5. 464782715 | 1  |
| MSTRG. 16704. 3  | 30   | 0. 41776 | 7. 834899902 | 1  |
| MSTRG. 16702. 10 | 538  | 0. 33172 | 9. 249938965 | 1  |

|                  |      |          |              |    |
|------------------|------|----------|--------------|----|
| MSTRG. 16702. 12 | 320  | 0. 33112 | 8. 726013184 | 1  |
| MSTRG. 16702. 13 | 130  | 0. 28999 | 9. 218322754 | 1  |
| MSTRG. 16709. 4  | 1152 | 0. 41425 | 4. 977722168 | 1  |
| MSTRG. 16709. 7  | 74   | 0. 28648 | 9. 730163574 | 1  |
| MSTRG. 16696. 4  | 226  | 0. 32246 | 4. 807556152 | 1  |
| MSTRG. 16712. 1  | 1375 | 0. 35903 | 5. 956115723 | 1  |
| MSTRG. 16712. 2  | 1288 | 0. 36068 | 6. 266906738 | 1  |
| MSTRG. 16712. 3  | 1375 | 0. 37953 | 5. 956115723 | 1  |
| MSTRG. 16712. 5  | 1375 | 0. 38118 | 5. 956115723 | 1  |
| MSTRG. 16712. 4  | 1375 | 0. 42305 | 5. 956115723 | 1  |
| MSTRG. 16712. 6  | 1288 | 0. 42224 | 6. 266906738 | 1  |
| MSTRG. 16712. 7  | 1288 | 0. 39694 | 6. 266906738 | 1  |
| MSTRG. 16712. 8  | 1249 | 0. 42011 | 6. 31842041  | 1  |
| MSTRG. 16712. 9  | 1336 | 0. 45125 | 5. 991394043 | 1  |
| MSTRG. 16712. 10 | 1336 | 0. 43075 | 5. 991394043 | 1  |
| MSTRG. 16712. 11 | 748  | 0. 4184  | 8. 058898926 | 1  |
| MSTRG. 16713. 1  | 528  | 0. 4702  | 8. 184020996 | 1  |
| MSTRG. 16713. 2  | 528  | 0. 4683  | 8. 184020996 | 1  |
| MSTRG. 16713. 4  | 197  | 0. 39012 | 5. 071960449 | 1  |
| MSTRG. 16713. 11 | 432  | 0. 29059 | 5. 84552002  | 1  |
| MSTRG. 16719. 2  | 1791 | 0. 46179 | 6. 107849121 | 1  |
| MSTRG. 16722. 1  | 1651 | 0. 48599 | 5. 434753418 | 1  |
| MSTRG. 16722. 2  | 1549 | 0. 50342 | 5. 215393066 | 1  |
| MSTRG. 16722. 3  | 1652 | 0. 45878 | 5. 434753418 | 1  |
| MSTRG. 16722. 5  | 1073 | 0. 43773 | 5. 632629395 | 1  |
| MSTRG. 16722. 6  | 841  | 0. 43805 | 5. 961853027 | 1  |
| MSTRG. 16726. 1  | 38   | 0. 37932 | 6. 818664551 | 1  |
| MSTRG. 16733. 1  | 132  | 0. 37047 | 5. 465759277 | 1  |
| MSTRG. 16733. 3  | 301  | 0. 46586 | 8. 736633301 | -1 |
| MSTRG. 16745. 1  | 45   | 0. 37975 | 9. 849304199 | 1  |
| MSTRG. 16747. 1  | 21   | 0. 41195 | 11. 00653076 | 1  |
| MSTRG. 16754. 2  | 42   | 0. 26963 | 5. 15411377  | 1  |
| MSTRG. 16757. 3  | 601  | 0. 46376 | 5. 516418457 | 1  |
| MSTRG. 16757. 4  | 601  | 0. 42968 | 5. 516418457 | 1  |
| MSTRG. 16748. 2  | 366  | 0. 37425 | 8. 920471191 | 1  |
| MSTRG. 16749. 1  | 74   | 0. 44064 | 8. 721252441 | -1 |
| MSTRG. 16749. 2  | 32   | 0. 37798 | 5. 272766113 | -1 |
| MSTRG. 16750. 1  | 49   | 0. 36742 | 10. 26641846 | 1  |
| MSTRG. 16761. 3  | 70   | 0. 30788 | 8. 986633301 | 1  |
| MSTRG. 16764. 2  | 707  | 0. 34431 | 6. 401550293 | 1  |
| MSTRG. 16765. 1  | 100  | 0. 40619 | 5. 863830566 | 1  |
| MSTRG. 16766. 1  | 96   | 0. 38904 | 6. 002258301 | 1  |
| MSTRG. 16767. 1  | 76   | 0. 33851 | 4. 650695801 | 1  |
| MSTRG. 16769. 1  | 67   | 0. 2785  | 8. 781677246 | 1  |
| MSTRG. 16772. 2  | 1280 | 0. 44464 | 5. 72454834  | 1  |
| MSTRG. 16772. 3  | 1063 | 0. 42414 | 8. 566833496 | 1  |
| MSTRG. 16772. 4  | 1050 | 0. 44464 | 5. 987365723 | 1  |
| MSTRG. 16772. 5  | 1261 | 0. 44464 | 5. 995422363 | 1  |
| MSTRG. 16776. 1  | 58   | 0. 43599 | 5. 376403809 | 1  |
| MSTRG. 16799. 10 | 1012 | 0. 42492 | 6. 430358887 | 1  |
| MSTRG. 16799. 7  | 1015 | 0. 42492 | 6. 430358887 | 1  |
| MSTRG. 16799. 8  | 1012 | 0. 42492 | 6. 430358887 | 1  |
| MSTRG. 16799. 9  | 1012 | 0. 42573 | 6. 430358887 | 1  |
| MSTRG. 16799. 3  | 1015 | 0. 42108 | 6. 430358887 | 1  |

|                  |      |          |              |    |
|------------------|------|----------|--------------|----|
| MSTRG. 16799. 2  | 3512 | 0. 44237 | 6. 776062012 | 1  |
| MSTRG. 16799. 11 | 3601 | 0. 44237 | 6. 785217285 | 1  |
| MSTRG. 16799. 4  | 3601 | 0. 44237 | 6. 785217285 | 1  |
| MSTRG. 16799. 5  | 3637 | 0. 44237 | 7. 028869629 | 1  |
| MSTRG. 16799. 1  | 3600 | 0. 45105 | 7. 075134277 | 1  |
| MSTRG. 16801. 1  | 62   | 0. 28508 | 8. 541809082 | 1  |
| MSTRG. 16799. 12 | 180  | 0. 32567 | 6. 899597168 | 1  |
| MSTRG. 16799. 13 | 1439 | 0. 47138 | 5. 417663574 | 1  |
| MSTRG. 16802. 1  | 110  | 0. 34079 | 8. 553161621 | 1  |
| MSTRG. 16803. 1  | 67   | 0. 3657  | 9. 68951416  | 1  |
| MSTRG. 16780. 1  | 30   | 0. 32922 | 5. 221862793 | -1 |
| MSTRG. 16784. 2  | 350  | 0. 30846 | 9. 277770996 | 1  |
| MSTRG. 16785. 1  | 67   | 0. 36113 | 9. 696716309 | -1 |
| MSTRG. 16787. 1  | 23   | 0. 40789 | 12. 00848389 | 1  |
| MSTRG. 16789. 1  | 47   | 0. 27015 | 8. 592346191 | 1  |
| MSTRG. 16823. 10 | 888  | 0. 43152 | 9. 334411621 | 1  |
| MSTRG. 16823. 8  | 888  | 0. 43152 | 9. 334411621 | 1  |
| MSTRG. 16823. 1  | 993  | 0. 41545 | 9. 052062988 | 1  |
| MSTRG. 16823. 5  | 980  | 0. 41545 | 9. 130432129 | 1  |
| MSTRG. 16823. 6  | 983  | 0. 41545 | 9. 130432129 | 1  |
| MSTRG. 16823. 7  | 1017 | 0. 41545 | 9. 143981934 | 1  |
| MSTRG. 16823. 9  | 990  | 0. 4545  | 9. 46685791  | 1  |
| MSTRG. 16823. 2  | 983  | 0. 41545 | 9. 130432129 | 1  |
| MSTRG. 16823. 3  | 1007 | 0. 41545 | 9. 211486816 | 1  |
| MSTRG. 16823. 11 | 1017 | 0. 4404  | 9. 143981934 | 1  |
| MSTRG. 16823. 12 | 135  | 0. 33953 | 7. 02923584  | 1  |
| MSTRG. 16824. 1  | 71   | 0. 3578  | 10. 1696167  | 1  |
| MSTRG. 16824. 2  | 101  | 0. 37675 | 9. 821838379 | 1  |
| MSTRG. 16824. 3  | 106  | 0. 32427 | 8. 737854004 | 1  |
| MSTRG. 16816. 2  | 130  | 0. 36366 | 9. 946472168 | 1  |
| MSTRG. 16816. 3  | 239  | 0. 31596 | 4. 695251465 | 1  |
| MSTRG. 16817. 1  | 125  | 0. 28174 | 10. 43487549 | 1  |
| MSTRG. 16818. 1  | 99   | 0. 31437 | 6. 713439941 | 1  |
| MSTRG. 16818. 2  | 50   | 0. 38363 | 5. 048034668 | 1  |
| MSTRG. 16820. 1  | 90   | 0. 36771 | 10. 5244751  | 1  |
| MSTRG. 16835. 1  | 28   | 0. 32076 | 7. 728210449 | 1  |
| MSTRG. 16835. 2  | 28   | 0. 3356  | 7. 728210449 | 1  |
| MSTRG. 16840. 1  | 233  | 0. 35039 | 9. 00958252  | 1  |
| MSTRG. 16847. 1  | 45   | 0. 36462 | 9. 300598145 | 1  |
| MSTRG. 16847. 2  | 26   | 0. 45531 | 11. 00030518 | 1  |
| MSTRG. 16855. 1  | 53   | 0. 37241 | 10. 08746338 | 1  |
| MSTRG. 16878. 1  | 53   | 0. 41412 | 6. 824157715 | -1 |
| MSTRG. 16879. 1  | 59   | 0. 44809 | 5. 378723145 | 1  |
| MSTRG. 16884. 1  | 89   | 0. 32635 | 7. 965026855 | 1  |
| MSTRG. 17027. 1  | 595  | 0. 3287  | 8. 580871582 | 1  |
| MSTRG. 17027. 4  | 466  | 0. 29607 | 8. 478210449 | 1  |
| MSTRG. 17027. 5  | 483  | 0. 31677 | 8. 584289551 | 1  |
| MSTRG. 17027. 3  | 533  | 0. 36886 | 7. 783874512 | 1  |
| MSTRG. 17027. 6  | 610  | 0. 32477 | 8. 10369873  | 1  |
| MSTRG. 17028. 1  | 114  | 0. 35984 | 9. 774230957 | 1  |
| MSTRG. 17027. 8  | 387  | 0. 2921  | 6. 537414551 | 1  |
| MSTRG. 17027. 12 | 399  | 0. 34222 | 6. 70135498  | 1  |
| MSTRG. 17027. 13 | 459  | 0. 37566 | 8. 671203613 | 1  |
| MSTRG. 17027. 20 | 317  | 0. 29851 | 6. 886047363 | 1  |

|                  |      |          |              |    |
|------------------|------|----------|--------------|----|
| MSTRG. 17027. 16 | 325  | 0. 29367 | 7. 516418457 | 1  |
| MSTRG. 17027. 17 | 325  | 0. 31209 | 6. 852722168 | 1  |
| MSTRG. 17027. 21 | 336  | 0. 29343 | 7. 186462402 | 1  |
| MSTRG. 17027. 22 | 253  | 0. 2921  | 7. 175842285 | 1  |
| MSTRG. 17027. 23 | 139  | 0. 3     | 6. 479797363 | 1  |
| MSTRG. 17031. 1  | 149  | 0. 28982 | 8. 842224121 | 1  |
| MSTRG. 17027. 24 | 253  | 0. 3208  | 7. 175842285 | 1  |
| MSTRG. 17027. 25 | 399  | 0. 3373  | 6. 70135498  | 1  |
| MSTRG. 17027. 26 | 325  | 0. 29343 | 7. 516418457 | 1  |
| MSTRG. 17027. 27 | 325  | 0. 30804 | 7. 516418457 | 1  |
| MSTRG. 17027. 28 | 86   | 0. 29895 | 8. 503112793 | 1  |
| MSTRG. 17033. 1  | 40   | 0. 31463 | 9. 511657715 | 1  |
| MSTRG. 17027. 29 | 101  | 0. 27517 | 6. 219177246 | 1  |
| MSTRG. 17027. 30 | 198  | 0. 27517 | 9. 444519043 | 1  |
| MSTRG. 17034. 1  | 103  | 0. 27517 | 6. 92767334  | 1  |
| MSTRG. 17035. 1  | 99   | 0. 31901 | 9. 101013184 | 1  |
| MSTRG. 17036. 1  | 93   | 0. 30387 | 7. 715393066 | 1  |
| MSTRG. 17037. 1  | 124  | 0. 32072 | 11. 30255127 | 1  |
| MSTRG. 17038. 1  | 155  | 0. 32557 | 10. 03009033 | 1  |
| MSTRG. 17039. 1  | 189  | 0. 32237 | 9. 577819824 | 1  |
| MSTRG. 17040. 1  | 64   | 0. 31901 | 8. 571472168 | 1  |
| MSTRG. 17041. 1  | 145  | 0. 29366 | 10. 0269165  | 1  |
| MSTRG. 17042. 1  | 157  | 0. 35839 | 11. 00518799 | 1  |
| MSTRG. 17042. 2  | 283  | 0. 32238 | 9. 183044434 | 1  |
| MSTRG. 17027. 31 | 65   | 0. 32237 | 8. 890930176 | 1  |
| MSTRG. 17027. 32 | 162  | 0. 29367 | 8. 300842285 | 1  |
| MSTRG. 17027. 34 | 366  | 0. 29595 | 8. 651306152 | 1  |
| MSTRG. 17027. 33 | 93   | 0. 2921  | 9. 956359863 | 1  |
| MSTRG. 17027. 35 | 42   | 0. 3703  | 5. 25177002  | 1  |
| MSTRG. 17027. 37 | 201  | 0. 28562 | 8. 841491699 | 1  |
| MSTRG. 17027. 36 | 75   | 0. 29343 | 4. 909118652 | 1  |
| MSTRG. 17027. 38 | 366  | 0. 28982 | 8. 651306152 | 1  |
| MSTRG. 17027. 40 | 513  | 0. 29387 | 9. 349182129 | 1  |
| MSTRG. 17027. 39 | 105  | 0. 29374 | 6. 695617676 | 1  |
| MSTRG. 17027. 41 | 201  | 0. 25074 | 8. 841491699 | 1  |
| MSTRG. 17027. 42 | 201  | 0. 27435 | 8. 841491699 | 1  |
| MSTRG. 17027. 43 | 83   | 0. 28165 | 9. 102233887 | 1  |
| MSTRG. 17027. 44 | 83   | 0. 3118  | 9. 102233887 | 1  |
| MSTRG. 17044. 1  | 63   | 0. 26963 | 11. 16595459 | 1  |
| MSTRG. 17027. 45 | 88   | 0. 30135 | 10. 54754639 | 1  |
| MSTRG. 17027. 46 | 119  | 0. 3118  | 8. 598327637 | 1  |
| MSTRG. 17045. 1  | 72   | 0. 27025 | 5. 43548584  | 1  |
| MSTRG. 17046. 1  | 72   | 0. 31204 | 9. 256896973 | 1  |
| MSTRG. 17047. 1  | 122  | 0. 28644 | 9. 740539551 | 1  |
| MSTRG. 17048. 1  | 91   | 0. 32389 | 8. 987365723 | 1  |
| MSTRG. 17049. 1  | 112  | 0. 36019 | 6. 892150879 | 1  |
| MSTRG. 17050. 1  | 78   | 0. 31368 | 10. 46112061 | 1  |
| MSTRG. 17051. 1  | 86   | 0. 33902 | 9. 216003418 | 1  |
| MSTRG. 16890. 1  | 555  | 0. 41932 | 5. 307434082 | 1  |
| MSTRG. 16890. 2  | 252  | 0. 48436 | 4. 719299316 | -1 |
| MSTRG. 16899. 2  | 1095 | 0. 42799 | 7. 899841309 | 1  |
| MSTRG. 16906. 1  | 1104 | 0. 46549 | 5. 921936035 | 1  |
| MSTRG. 16906. 3  | 197  | 0. 44559 | 5. 156677246 | 1  |
| MSTRG. 16907. 3  | 212  | 0. 41011 | 9. 139099121 | 1  |

|                 |      |          |              |    |
|-----------------|------|----------|--------------|----|
| MSTRG. 16907. 1 | 261  | 0. 33152 | 6. 440246582 | 1  |
| MSTRG. 16907. 2 | 85   | 0. 27931 | 6. 792175293 | 1  |
| MSTRG. 16907. 4 | 85   | 0. 27931 | 6. 792175293 | 1  |
| MSTRG. 16907. 5 | 98   | 0. 29907 | 9. 199157715 | 1  |
| MSTRG. 16907. 6 | 184  | 0. 36072 | 9. 53314209  | 1  |
| MSTRG. 16907. 8 | 261  | 0. 4388  | 6. 440246582 | 1  |
| MSTRG. 16907. 7 | 85   | 0. 28503 | 6. 792175293 | 1  |
| MSTRG. 16907. 9 | 81   | 0. 3152  | 8. 589294434 | 1  |
| MSTRG. 16911. 1 | 65   | 0. 35556 | 8. 937927246 | 1  |
| MSTRG. 16912. 1 | 281  | 0. 31233 | 9. 590270996 | 1  |
| MSTRG. 16915. 1 | 992  | 0. 47914 | 5. 644348145 | 1  |
| MSTRG. 16918. 2 | 184  | 0. 34969 | 4. 87689209  | 1  |
| MSTRG. 16918. 1 | 150  | 0. 31208 | 7. 612609863 | 1  |
| MSTRG. 16912. 2 | 520  | 0. 4055  | 9. 009460449 | 1  |
| MSTRG. 16912. 3 | 520  | 0. 454   | 9. 009460449 | 1  |
| MSTRG. 16902. 3 | 274  | 0. 37229 | 8. 926818848 | 1  |
| MSTRG. 16902. 4 | 274  | 0. 37229 | 8. 926818848 | 1  |
| MSTRG. 16919. 1 | 94   | 0. 38917 | 9. 588195801 | -1 |
| MSTRG. 16920. 1 | 68   | 0. 32106 | 7. 684631348 | 1  |
| MSTRG. 16922. 1 | 38   | 0. 38127 | 6. 804748535 | 1  |
| MSTRG. 16930. 6 | 869  | 0. 46865 | 6. 00579834  | 1  |
| MSTRG. 16927. 1 | 364  | 0. 41849 | 7. 116760254 | 1  |
| MSTRG. 16928. 1 | 60   | 0. 45289 | 9. 101257324 | 1  |
| MSTRG. 16935. 7 | 379  | 0. 3919  | 8. 863708496 | 1  |
| MSTRG. 16936. 1 | 128  | 0. 29772 | 9. 250793457 | 1  |
| MSTRG. 16935. 8 | 373  | 0. 4124  | 9. 252624512 | 1  |
| MSTRG. 16938. 1 | 169  | 0. 30808 | 7. 634460449 | 1  |
| MSTRG. 16940. 1 | 117  | 0. 33887 | 5. 005187988 | 1  |
| MSTRG. 16940. 2 | 117  | 0. 33887 | 5. 005187988 | 1  |
| MSTRG. 16940. 3 | 142  | 0. 34527 | 6. 10369873  | 1  |
| MSTRG. 16940. 4 | 132  | 0. 32257 | 7. 87286377  | 1  |
| MSTRG. 16945. 1 | 1097 | 0. 42712 | 4. 827453613 | 1  |
| MSTRG. 16948. 1 | 102  | 0. 28584 | 9. 195251465 | 1  |
| MSTRG. 16949. 2 | 404  | 0. 32625 | 6. 575866699 | 1  |
| MSTRG. 16953. 4 | 2062 | 0. 47891 | 7. 166320801 | 1  |
| MSTRG. 16954. 1 | 123  | 0. 30775 | 8. 807678223 | 1  |
| MSTRG. 16959. 1 | 224  | 0. 38268 | 9. 445251465 | 1  |
| MSTRG. 16959. 2 | 224  | 0. 38268 | 9. 445251465 | 1  |
| MSTRG. 16961. 1 | 90   | 0. 34952 | 10. 10809326 | 1  |
| MSTRG. 16962. 1 | 71   | 0. 3637  | 7. 508239746 | 1  |
| MSTRG. 16965. 1 | 207  | 0. 39001 | 5. 823181152 | 1  |
| MSTRG. 16965. 2 | 207  | 0. 38408 | 5. 823181152 | 1  |
| MSTRG. 16965. 4 | 122  | 0. 30415 | 6. 276184082 | -1 |
| MSTRG. 16965. 3 | 341  | 0. 33091 | 8. 16595459  | 1  |
| MSTRG. 16965. 5 | 102  | 0. 30415 | 6. 513244629 | 1  |
| MSTRG. 16965. 6 | 168  | 0. 40074 | 5. 409484863 | 1  |
| MSTRG. 16965. 7 | 159  | 0. 46093 | 8. 562683105 | 1  |
| MSTRG. 16966. 1 | 207  | 0. 29526 | 8. 92755127  | 1  |
| MSTRG. 16966. 2 | 207  | 0. 28338 | 8. 79119873  | 1  |
| MSTRG. 16967. 1 | 94   | 0. 31951 | 6. 007263184 | 1  |
| MSTRG. 16968. 1 | 53   | 0. 30145 | 4. 316101074 | 1  |
| MSTRG. 16963. 5 | 61   | 0. 4615  | 7. 854064941 | -1 |
| MSTRG. 16971. 1 | 646  | 0. 46168 | 5. 69354248  | 1  |
| MSTRG. 16971. 2 | 599  | 0. 455   | 5. 558044434 | 1  |

|                  |      |          |              |    |
|------------------|------|----------|--------------|----|
| MSTRG. 16971. 3  | 599  | 0. 47004 | 5. 558044434 | 1  |
| MSTRG. 16971. 4  | 361  | 0. 44958 | 5. 868225098 | 1  |
| MSTRG. 16971. 6  | 683  | 0. 45452 | 6. 675476074 | 1  |
| MSTRG. 16971. 8  | 467  | 0. 46581 | 5. 370422363 | 1  |
| MSTRG. 16971. 10 | 265  | 0. 4697  | 5. 550109863 | 1  |
| MSTRG. 16971. 9  | 514  | 0. 4779  | 5. 527526855 | 1  |
| MSTRG. 16973. 1  | 101  | 0. 31765 | 7. 848693848 | 1  |
| MSTRG. 16974. 2  | 168  | 0. 37383 | 6. 229797363 | 1  |
| MSTRG. 16974. 3  | 168  | 0. 34429 | 6. 229797363 | 1  |
| MSTRG. 16978. 1  | 634  | 0. 45837 | 8. 628845215 | 1  |
| MSTRG. 16978. 2  | 1194 | 0. 4655  | 9. 301574707 | 1  |
| MSTRG. 16978. 3  | 630  | 0. 35568 | 9. 63067627  | 1  |
| MSTRG. 16978. 4  | 1194 | 0. 46345 | 9. 301574707 | 1  |
| MSTRG. 16988. 6  | 3484 | 0. 44813 | 9. 226745605 | 1  |
| MSTRG. 16988. 4  | 8333 | 0. 46503 | 9. 02154541  | 1  |
| MSTRG. 16988. 5  | 8308 | 0. 46474 | 8. 969299316 | 1  |
| MSTRG. 16988. 3  | 8308 | 0. 45068 | 8. 967834473 | 1  |
| MSTRG. 16988. 9  | 147  | 0. 43345 | 6. 702331543 | 1  |
| MSTRG. 16992. 2  | 419  | 0. 43369 | 9. 270324707 | 1  |
| MSTRG. 16996. 1  | 29   | 0. 39634 | 6. 888366699 | 1  |
| MSTRG. 16997. 1  | 75   | 0. 37095 | 6. 038635254 | 1  |
| MSTRG. 16997. 2  | 62   | 0. 40747 | 6. 054138184 | 1  |
| MSTRG. 16998. 1  | 74   | 0. 29727 | 9. 097595215 | 1  |
| MSTRG. 16999. 1  | 59   | 0. 33348 | 9. 510681152 | 1  |
| MSTRG. 17005. 1  | 37   | 0. 42865 | 4. 55657959  | 1  |
| MSTRG. 17004. 6  | 66   | 0. 30827 | 6. 23638916  | 1  |
| MSTRG. 17004. 7  | 74   | 0. 34072 | 10. 04437256 | -1 |
| MSTRG. 17004. 8  | 49   | 0. 29816 | 9. 938537598 | 1  |
| MSTRG. 17008. 1  | 73   | 0. 42937 | 10. 65814209 | 1  |
| MSTRG. 17011. 2  | 234  | 0. 33061 | 11. 04632568 | 1  |
| MSTRG. 17011. 3  | 217  | 0. 33153 | 10. 840271   | 1  |
| MSTRG. 17011. 5  | 217  | 0. 39248 | 10. 840271   | 1  |
| MSTRG. 17012. 1  | 133  | 0. 42208 | 11. 56195068 | 1  |
| MSTRG. 17012. 2  | 133  | 0. 35432 | 11. 56195068 | 1  |
| MSTRG. 17016. 1  | 63   | 0. 41511 | 5. 604675293 | 1  |
| MSTRG. 17053. 2  | 8    | 0. 34748 | 6. 487731934 | 1  |
| MSTRG. 17053. 1  | 19   | 0. 31563 | 10. 05218506 | 1  |
| MSTRG. 17054. 1  | 1822 | 0. 4689  | 7. 563659668 | 1  |
| MSTRG. 17054. 2  | 1685 | 0. 45593 | 8. 118713379 | 1  |
| MSTRG. 17055. 1  | 156  | 0. 33828 | 10. 50616455 | 1  |
| MSTRG. 17054. 3  | 468  | 0. 42243 | 9. 689025879 | 1  |
| MSTRG. 17060. 1  | 52   | 0. 3979  | 9. 976623535 | 1  |
| MSTRG. 17061. 1  | 126  | 0. 27732 | 9. 249328613 | 1  |
| MSTRG. 17061. 2  | 103  | 0. 28519 | 6. 704040527 | 1  |
| MSTRG. 17067. 1  | 56   | 0. 34533 | 10. 68951416 | 1  |
| MSTRG. 17067. 2  | 142  | 0. 35551 | 11. 77984619 | 1  |
| MSTRG. 17066. 2  | 1305 | 0. 43794 | 9. 002502441 | 1  |
| MSTRG. 17069. 1  | 164  | 0. 40601 | 4. 891784668 | 1  |
| MSTRG. 17069. 2  | 164  | 0. 43741 | 4. 891784668 | 1  |
| MSTRG. 17074. 2  | 127  | 0. 36706 | 9. 428039551 | 1  |
| MSTRG. 17074. 4  | 345  | 0. 45199 | 8. 192810059 | 1  |
| MSTRG. 17074. 6  | 329  | 0. 43123 | 8. 769714355 | 1  |
| MSTRG. 17076. 1  | 429  | 0. 33186 | 6. 471618652 | 1  |
| MSTRG. 17076. 4  | 450  | 0. 4461  | 6. 359924316 | 1  |

|                 |      |          |              |    |
|-----------------|------|----------|--------------|----|
| MSTRG. 17076. 6 | 520  | 0. 44059 | 7. 045593262 | 1  |
| MSTRG. 17077. 1 | 337  | 0. 43796 | 9. 625671387 | 1  |
| MSTRG. 17078. 5 | 194  | 0. 30092 | 5. 483337402 | 1  |
| MSTRG. 17078. 1 | 192  | 0. 28731 | 5. 018859863 | 1  |
| MSTRG. 17079. 1 | 101  | 0. 30961 | 6. 567321777 | 1  |
| MSTRG. 17078. 6 | 163  | 0. 28167 | 5. 744934082 | 1  |
| MSTRG. 17085. 2 | 87   | 0. 32575 | 11. 75726318 | 1  |
| MSTRG. 17087. 3 | 567  | 0. 31175 | 7. 58416748  | 1  |
| MSTRG. 17087. 4 | 567  | 0. 3721  | 7. 58416748  | 1  |
| MSTRG. 17092. 1 | 116  | 0. 35103 | 11. 04302979 | 1  |
| MSTRG. 17093. 1 | 64   | 0. 31765 | 10. 71295166 | 1  |
| MSTRG. 17093. 2 | 75   | 0. 34952 | 12. 00872803 | 1  |
| MSTRG. 17093. 3 | 67   | 0. 33803 | 10. 65802002 | 1  |
| MSTRG. 17093. 4 | 67   | 0. 34084 | 10. 65802002 | 1  |
| MSTRG. 17093. 5 | 64   | 0. 32573 | 10. 71295166 | 1  |
| MSTRG. 17096. 2 | 678  | 0. 45841 | 6. 741027832 | 1  |
| MSTRG. 17096. 3 | 377  | 0. 39123 | 6. 47064209  | 1  |
| MSTRG. 17101. 1 | 1128 | 0. 45612 | 5. 861999512 | 1  |
| MSTRG. 17105. 1 | 159  | 0. 3563  | 5. 926452637 | 1  |
| MSTRG. 17109. 4 | 203  | 0. 35949 | 7. 704406738 | 1  |
| MSTRG. 17109. 2 | 686  | 0. 38024 | 6. 688415527 | 1  |
| MSTRG. 17109. 5 | 239  | 0. 2997  | 8. 754333496 | 1  |
| MSTRG. 17111. 3 | 399  | 0. 42935 | 8. 794006348 | 1  |
| MSTRG. 17114. 1 | 205  | 0. 31638 | 10. 21112061 | 1  |
| MSTRG. 17114. 2 | 82   | 0. 31234 | 9. 019226074 | -1 |
| MSTRG. 17115. 2 | 408  | 0. 43287 | 8. 377502441 | 1  |
| MSTRG. 17110. 3 | 603  | 0. 32791 | 9. 786315918 | 1  |
| MSTRG. 17110. 1 | 15   | 0. 35303 | 11. 70025635 | -1 |
| MSTRG. 17110. 2 | 501  | 0. 39263 | 7. 278503418 | 1  |
| MSTRG. 17110. 4 | 926  | 0. 33779 | 8. 90447998  | 1  |
| MSTRG. 17110. 5 | 986  | 0. 31729 | 9. 191589355 | 1  |
| MSTRG. 17110. 6 | 1019 | 0. 35634 | 9. 079162598 | 1  |
| MSTRG. 17116. 1 | 272  | 0. 42347 | 6. 092956543 | 1  |
| MSTRG. 17117. 1 | 677  | 0. 41395 | 6. 433288574 | 1  |
| MSTRG. 17117. 3 | 677  | 0. 41091 | 6. 433288574 | 1  |
| MSTRG. 17119. 2 | 290  | 0. 46851 | 4. 826843262 | 1  |
| MSTRG. 17119. 3 | 290  | 0. 46851 | 4. 826843262 | 1  |
| MSTRG. 17119. 5 | 290  | 0. 46975 | 4. 826843262 | 1  |
| MSTRG. 17131. 1 | 474  | 0. 42213 | 5. 867492676 | -1 |
| MSTRG. 17138. 2 | 114  | 0. 29788 | 8. 981018066 | 1  |
| MSTRG. 17138. 3 | 474  | 0. 34531 | 9. 471862793 | 1  |
| MSTRG. 17138. 4 | 287  | 0. 33322 | 9. 668273926 | 1  |
| MSTRG. 17138. 6 | 375  | 0. 3562  | 9. 644226074 | 1  |
| MSTRG. 17140. 2 | 107  | 0. 28586 | 10. 59515381 | 1  |
| MSTRG. 17134. 1 | 314  | 0. 3787  | 4. 335754395 | 1  |
| MSTRG. 17134. 2 | 216  | 0. 3582  | 7. 718444824 | 1  |
| MSTRG. 17145. 1 | 53   | 0. 37167 | 10. 05609131 | 1  |
| MSTRG. 17150. 1 | 78   | 0. 35344 | 9. 565246582 | 1  |
| MSTRG. 17150. 2 | 78   | 0. 36075 | 9. 565246582 | 1  |
| MSTRG. 17151. 4 | 533  | 0. 39839 | 9. 044616699 | 1  |
| MSTRG. 17152. 2 | 94   | 0. 37251 | 4. 387268066 | 1  |
| MSTRG. 17155. 1 | 271  | 0. 27251 | 9. 660583496 | 1  |
| MSTRG. 17155. 4 | 271  | 0. 28842 | 9. 660583496 | 1  |
| MSTRG. 17166. 1 | 85   | 0. 32858 | 12. 10455322 | 1  |



|                  |      |          |              |    |
|------------------|------|----------|--------------|----|
| MSTRG. 17166. 2  | 51   | 0. 35583 | 10. 0401001  | -1 |
| MSTRG. 17168. 2  | 167  | 0. 28779 | 6. 43548584  | 1  |
| MSTRG. 17168. 3  | 526  | 0. 29408 | 7. 807067871 | 1  |
| MSTRG. 17158. 1  | 45   | 0. 37291 | 9. 185852051 | 1  |
| MSTRG. 17172. 2  | 98   | 0. 3364  | 6. 040588379 | 1  |
| MSTRG. 17172. 3  | 134  | 0. 29328 | 6. 991394043 | 1  |
| MSTRG. 17192. 2  | 499  | 0. 41257 | 9. 616027832 | 1  |
| MSTRG. 17192. 1  | 688  | 0. 43377 | 9. 381896973 | 1  |
| MSTRG. 17192. 3  | 387  | 0. 39579 | 9. 27130127  | 1  |
| MSTRG. 17192. 4  | 576  | 0. 45496 | 8. 92767334  | 1  |
| MSTRG. 17193. 1  | 92   | 0. 34834 | 7. 892150879 | 1  |
| MSTRG. 17202. 1  | 91   | 0. 34998 | 9. 382019043 | 1  |
| MSTRG. 17207. 1  | 75   | 0. 40275 | 9. 797302246 | 1  |
| MSTRG. 17215. 2  | 79   | 0. 34996 | 9. 127990723 | 1  |
| MSTRG. 17225. 1  | 59   | 0. 3222  | 10. 73651123 | 1  |
| MSTRG. 17175. 1  | 50   | 0. 33329 | 3. 692077637 | 1  |
| MSTRG. 17175. 2  | 50   | 0. 33398 | 3. 692077637 | 1  |
| MSTRG. 17176. 1  | 48   | 0. 34332 | 4. 406555176 | -1 |
| MSTRG. 17177. 4  | 731  | 0. 43062 | 5. 883361816 | 1  |
| MSTRG. 17177. 3  | 828  | 0. 4604  | 6. 171447754 | 1  |
| MSTRG. 17177. 2  | 1306 | 0. 47306 | 6. 254577637 | 1  |
| MSTRG. 17177. 5  | 839  | 0. 46264 | 6. 288635254 | 1  |
| MSTRG. 17177. 6  | 828  | 0. 45247 | 6. 171447754 | 1  |
| MSTRG. 17178. 1  | 183  | 0. 37355 | 9. 083190918 | 1  |
| MSTRG. 17178. 2  | 163  | 0. 3409  | 9. 29901123  | 1  |
| MSTRG. 17177. 7  | 602  | 0. 47087 | 6. 200744629 | 1  |
| MSTRG. 17179. 1  | 85   | 0. 39463 | 9. 389465332 | 1  |
| MSTRG. 17180. 1  | 32   | 0. 37102 | 4. 529602051 | 1  |
| MSTRG. 17398. 2  | 225  | 0. 50425 | 9. 716491699 | 1  |
| MSTRG. 17399. 1  | 89   | 0. 34939 | 9. 483947754 | 1  |
| MSTRG. 17400. 1  | 49   | 0. 28246 | 5. 262145996 | 1  |
| MSTRG. 17401. 1  | 86   | 0. 28959 | 12. 25543213 | 1  |
| MSTRG. 17402. 1  | 217  | 0. 36157 | 8. 23638916  | 1  |
| MSTRG. 17402. 2  | 75   | 0. 3771  | 11. 00006104 | 1  |
| MSTRG. 17402. 3  | 60   | 0. 30704 | 4. 581237793 | 1  |
| MSTRG. 17402. 5  | 20   | 0. 37813 | 9. 186096191 | -1 |
| MSTRG. 17402. 6  | 89   | 0. 35701 | 8. 76361084  | 1  |
| MSTRG. 17402. 11 | 114  | 0. 28478 | 4. 687927246 | 1  |
| MSTRG. 17403. 1  | 94   | 0. 31978 | 9. 403137207 | 1  |
| MSTRG. 17402. 13 | 137  | 0. 31669 | 8. 817443848 | 1  |
| MSTRG. 17405. 1  | 77   | 0. 28923 | 7. 844787598 | 1  |
| MSTRG. 17402. 14 | 79   | 0. 32858 | 8. 513244629 | 1  |
| MSTRG. 17402. 15 | 563  | 0. 47843 | 5. 528503418 | 1  |
| MSTRG. 17402. 16 | 144  | 0. 30955 | 6. 237976074 | 1  |
| MSTRG. 17402. 19 | 705  | 0. 44489 | 6. 379821777 | 1  |
| MSTRG. 17402. 17 | 178  | 0. 33247 | 8. 770080566 | 1  |
| MSTRG. 17402. 20 | 403  | 0. 35184 | 8. 977111816 | 1  |
| MSTRG. 17402. 21 | 418  | 0. 39061 | 9. 126525879 | 1  |
| MSTRG. 17402. 24 | 732  | 0. 34639 | 8. 666809082 | 1  |
| MSTRG. 17402. 23 | 403  | 0. 45148 | 8. 977111816 | 1  |
| MSTRG. 17402. 25 | 418  | 0. 43415 | 8. 983947754 | 1  |
| MSTRG. 17402. 29 | 732  | 0. 43379 | 8. 666809082 | 1  |
| MSTRG. 17402. 27 | 610  | 0. 38765 | 5. 465148926 | -1 |
| MSTRG. 17402. 31 | 545  | 0. 4432  | 7. 849304199 | 1  |

|                  |     |          |              |    |
|------------------|-----|----------|--------------|----|
| MSTRG. 17402. 32 | 576 | 0. 47766 | 6. 926696777 | 1  |
| MSTRG. 17406. 1  | 59  | 0. 39106 | 9. 699401855 | 1  |
| MSTRG. 17407. 1  | 268 | 0. 46367 | 8. 944030762 | -1 |
| MSTRG. 17402. 34 | 85  | 0. 2943  | 8. 752990723 | 1  |
| MSTRG. 17402. 35 | 65  | 0. 33566 | 6. 365661621 | 1  |
| MSTRG. 17402. 36 | 57  | 0. 34379 | 8. 493103027 | 1  |
| MSTRG. 17402. 37 | 705 | 0. 46604 | 6. 379821777 | 1  |
| MSTRG. 17408. 1  | 50  | 0. 3129  | 9. 101501465 | 1  |
| MSTRG. 17409. 1  | 110 | 0. 34007 | 9. 573181152 | 1  |
| MSTRG. 17409. 2  | 110 | 0. 31937 | 9. 573181152 | 1  |
| MSTRG. 17409. 3  | 110 | 0. 35328 | 9. 573181152 | 1  |
| MSTRG. 17410. 1  | 60  | 0. 37796 | 8. 235046387 | -1 |
| MSTRG. 17411. 1  | 52  | 0. 38808 | 5. 381164551 | 1  |
| MSTRG. 17412. 1  | 26  | 0. 31738 | 5. 570129395 | 1  |
| MSTRG. 17413. 1  | 100 | 0. 31233 | 9. 056091309 | 1  |
| MSTRG. 17414. 1  | 69  | 0. 40107 | 10. 70489502 | -1 |
| MSTRG. 17402. 38 | 179 | 0. 32714 | 8. 427429199 | 1  |
| MSTRG. 17415. 1  | 80  | 0. 31421 | 9. 848937988 | 1  |
| MSTRG. 17416. 1  | 67  | 0. 30104 | 10. 53375244 | 1  |
| MSTRG. 17417. 1  | 56  | 0. 33828 | 8. 210388184 | 1  |
| MSTRG. 17407. 2  | 357 | 0. 43303 | 9. 641052246 | 1  |
| MSTRG. 17407. 3  | 357 | 0. 38564 | 9. 362365723 | 1  |
| MSTRG. 17407. 4  | 83  | 0. 44378 | 9. 259338379 | 1  |
| MSTRG. 17418. 1  | 36  | 0. 36449 | 4. 425720215 | -1 |
| MSTRG. 17419. 1  | 78  | 0. 34624 | 9. 887756348 | 1  |
| MSTRG. 17420. 1  | 199 | 0. 29517 | 10. 83807373 | -1 |
| MSTRG. 17421. 2  | 225 | 0. 43996 | 9. 20892334  | 1  |
| MSTRG. 17421. 4  | 216 | 0. 48161 | 8. 220397949 | 1  |
| MSTRG. 17422. 1  | 409 | 0. 44326 | 8. 999694824 | -1 |
| MSTRG. 17400. 2  | 81  | 0. 34876 | 6. 944030762 | 1  |
| MSTRG. 17402. 68 | 84  | 0. 28922 | 10. 01141357 | 1  |
| MSTRG. 17402. 75 | 608 | 0. 42956 | 5. 424987793 | -1 |
| MSTRG. 17402. 77 | 184 | 0. 44973 | 9. 000305176 | 1  |
| MSTRG. 17424. 1  | 67  | 0. 37294 | 8. 659973145 | 1  |
| MSTRG. 17407. 10 | 920 | 0. 44084 | 5. 663879395 | 1  |
| MSTRG. 17407. 12 | 758 | 0. 45555 | 6. 229309082 | 1  |
| MSTRG. 17428. 1  | 89  | 0. 4063  | 9. 928283691 | 1  |
| MSTRG. 17421. 5  | 71  | 0. 3568  | 4. 902038574 | 1  |
| MSTRG. 17432. 1  | 61  | 0. 43507 | 9. 179504395 | 1  |
| MSTRG. 17421. 13 | 338 | 0. 42275 | 6. 710144043 | 1  |
| MSTRG. 17432. 2  | 104 | 0. 33198 | 8. 375183105 | 1  |
| MSTRG. 17187. 1  | 58  | 0. 32651 | 9. 033752441 | 1  |
| MSTRG. 17189. 1  | 42  | 0. 37202 | 9. 224304199 | 1  |
| MSTRG. 17189. 2  | 60  | 0. 35178 | 9. 795959473 | 1  |
| MSTRG. 17276. 3  | 143 | 0. 28267 | 10. 50213623 | 1  |
| MSTRG. 17276. 4  | 275 | 0. 28584 | 8. 787902832 | 1  |
| MSTRG. 17276. 5  | 275 | 0. 29772 | 8. 787902832 | 1  |
| MSTRG. 17276. 6  | 156 | 0. 34973 | 10. 34539795 | 1  |
| MSTRG. 17276. 7  | 67  | 0. 39335 | 4. 304626465 | 1  |
| MSTRG. 17278. 1  | 218 | 0. 42355 | 5. 002502441 | 1  |
| MSTRG. 17278. 3  | 172 | 0. 42611 | 5. 207092285 | 1  |
| MSTRG. 17278. 2  | 172 | 0. 40349 | 5. 207092285 | 1  |
| MSTRG. 17278. 4  | 218 | 0. 43543 | 5. 002502441 | 1  |
| MSTRG. 17279. 4  | 335 | 0. 35424 | 9. 27142334  | 1  |

|                  |      |          |              |    |
|------------------|------|----------|--------------|----|
| MSTRG. 17279. 3  | 465  | 0. 4591  | 8. 611755371 | 1  |
| MSTRG. 17280. 5  | 512  | 0. 37954 | 6. 065490723 | -1 |
| MSTRG. 17280. 4  | 685  | 0. 46823 | 5. 785217285 | 1  |
| MSTRG. 17190. 1  | 1271 | 0. 47481 | 5. 486755371 | 1  |
| MSTRG. 17263. 3  | 153  | 0. 28923 | 12. 13970947 | 1  |
| MSTRG. 17264. 1  | 145  | 0. 28923 | 9. 624450684 | 1  |
| MSTRG. 17264. 2  | 103  | 0. 29857 | 6. 950378418 | 1  |
| MSTRG. 17265. 1  | 88   | 0. 34984 | 9. 54095459  | 1  |
| MSTRG. 17266. 1  | 300  | 0. 30781 | 8. 281555176 | 1  |
| MSTRG. 17266. 3  | 233  | 0. 35464 | 7. 026550293 | 1  |
| MSTRG. 17266. 5  | 149  | 0. 29196 | 6. 06427002  | 1  |
| MSTRG. 17266. 6  | 169  | 0. 31182 | 8. 906066895 | 1  |
| MSTRG. 17191. 1  | 40   | 0. 32075 | 8. 881652832 | 1  |
| MSTRG. 17270. 1  | 244  | 0. 3161  | 11. 78961182 | 1  |
| MSTRG. 17269. 4  | 831  | 0. 41991 | 9. 331970215 | 1  |
| MSTRG. 17271. 1  | 97   | 0. 3295  | 9. 20489502  | 1  |
| MSTRG. 17292. 1  | 127  | 0. 3378  | 8. 80291748  | 1  |
| MSTRG. 17292. 2  | 26   | 0. 46679 | 7. 976257324 | 1  |
| MSTRG. 17294. 1  | 519  | 0. 33531 | 8. 819763184 | 1  |
| MSTRG. 17294. 2  | 515  | 0. 33531 | 8. 819763184 | 1  |
| MSTRG. 17294. 3  | 409  | 0. 28419 | 8. 863830566 | 1  |
| MSTRG. 17294. 5  | 293  | 0. 27651 | 8. 694396973 | 1  |
| MSTRG. 17294. 4  | 520  | 0. 44931 | 8. 68963623  | 1  |
| MSTRG. 17294. 6  | 522  | 0. 43545 | 8. 868347168 | 1  |
| MSTRG. 17294. 7  | 136  | 0. 27911 | 6. 360046387 | 1  |
| MSTRG. 17294. 9  | 163  | 0. 27651 | 8. 219543457 | 1  |
| MSTRG. 17294. 8  | 163  | 0. 27575 | 8. 219543457 | 1  |
| MSTRG. 17294. 10 | 123  | 0. 32237 | 8. 461730957 | 1  |
| MSTRG. 17294. 12 | 58   | 0. 2857  | 8. 036804199 | 1  |
| MSTRG. 17294. 13 | 152  | 0. 28584 | 9. 35723877  | 1  |
| MSTRG. 17294. 14 | 133  | 0. 28199 | 8. 746765137 | 1  |
| MSTRG. 17291. 1  | 17   | 0. 38228 | 8. 189025879 | 1  |
| MSTRG. 17299. 2  | 779  | 0. 42552 | 9. 50567627  | 1  |
| MSTRG. 17299. 3  | 681  | 0. 39183 | 9. 412658691 | -1 |
| MSTRG. 17301. 3  | 274  | 0. 44609 | 9. 157409668 | 1  |
| MSTRG. 17297. 2  | 265  | 0. 38015 | 7. 122009277 | 1  |
| MSTRG. 17307. 1  | 174  | 0. 32317 | 10. 75604248 | 1  |
| MSTRG. 17308. 3  | 639  | 0. 32022 | 8. 25579834  | 1  |
| MSTRG. 17308. 6  | 639  | 0. 32456 | 8. 25579834  | 1  |
| MSTRG. 17304. 1  | 18   | 0. 39874 | 11. 69903564 | 1  |
| MSTRG. 17306. 1  | 68   | 0. 37151 | 5. 29498291  | 1  |
| MSTRG. 17309. 2  | 440  | 0. 39474 | 6. 33782959  | 1  |
| MSTRG. 17310. 1  | 39   | 0. 43791 | 7. 99822998  | -1 |
| MSTRG. 17310. 2  | 56   | 0. 44393 | 7. 998596191 | 1  |
| MSTRG. 17311. 2  | 500  | 0. 40727 | 8. 092834473 | 1  |
| MSTRG. 17313. 1  | 69   | 0. 34513 | 10. 6293335  | 1  |
| MSTRG. 17313. 2  | 29   | 0. 4009  | 4. 667419434 | 1  |
| MSTRG. 17315. 2  | 401  | 0. 45544 | 5. 763000488 | 1  |
| MSTRG. 17326. 3  | 500  | 0. 3996  | 5. 160827637 | 1  |
| MSTRG. 17329. 1  | 656  | 0. 29615 | 8. 928649902 | 1  |
| MSTRG. 17333. 3  | 245  | 0. 32767 | 6. 308532715 | 1  |
| MSTRG. 17333. 2  | 115  | 0. 41482 | 7. 757141113 | 1  |
| MSTRG. 17334. 2  | 407  | 0. 41346 | 8. 902893066 | 1  |
| MSTRG. 17337. 1  | 113  | 0. 30175 | 9. 007873535 | 1  |

|                  |      |          |              |    |
|------------------|------|----------|--------------|----|
| MSTRG. 17339. 1  | 121  | 0. 39698 | 11. 25592041 | -1 |
| MSTRG. 17336. 6  | 50   | 0. 35977 | 7. 732116699 | 1  |
| MSTRG. 17336. 7  | 50   | 0. 33623 | 7. 732116699 | 1  |
| MSTRG. 17340. 1  | 44   | 0. 31442 | 4. 96673584  | 1  |
| MSTRG. 17341. 2  | 305  | 0. 42543 | 5. 434387207 | 1  |
| MSTRG. 17341. 6  | 330  | 0. 47156 | 5. 625793457 | 1  |
| MSTRG. 17343. 1  | 8    | 0. 3697  | 5. 753234863 | 1  |
| MSTRG. 17349. 5  | 1005 | 0. 46221 | 6. 25592041  | 1  |
| MSTRG. 17349. 4  | 1029 | 0. 48232 | 6. 258728027 | 1  |
| MSTRG. 17350. 1  | 129  | 0. 3155  | 9. 556335449 | 1  |
| MSTRG. 17349. 9  | 604  | 0. 39821 | 7. 30267334  | 1  |
| MSTRG. 17349. 12 | 771  | 0. 48057 | 6. 14263916  | 1  |
| MSTRG. 17349. 8  | 893  | 0. 4735  | 6. 74029541  | 1  |
| MSTRG. 17349. 7  | 894  | 0. 33959 | 6. 74029541  | 1  |
| MSTRG. 17349. 10 | 1216 | 0. 46263 | 8. 636413574 | 1  |
| MSTRG. 17349. 11 | 1180 | 0. 46346 | 8. 47088623  | 1  |
| MSTRG. 17349. 13 | 864  | 0. 46846 | 6. 422424316 | 1  |
| MSTRG. 17349. 14 | 147  | 0. 2921  | 9. 636413574 | 1  |
| MSTRG. 17349. 15 | 870  | 0. 45694 | 6. 738464355 | 1  |
| MSTRG. 17351. 1  | 100  | 0. 31171 | 6. 952575684 | 1  |
| MSTRG. 17352. 1  | 83   | 0. 33658 | 9. 78302002  | 1  |
| MSTRG. 17347. 1  | 49   | 0. 31265 | 10. 94830322 | 1  |
| MSTRG. 17348. 1  | 923  | 0. 38993 | 5. 56817627  | 1  |
| MSTRG. 17348. 2  | 923  | 0. 36683 | 5. 56817627  | 1  |
| MSTRG. 17348. 4  | 923  | 0. 38993 | 5. 56817627  | 1  |
| MSTRG. 17368. 10 | 837  | 0. 40657 | 8. 123352051 | 1  |
| MSTRG. 17368. 1  | 1165 | 0. 45381 | 8. 337097168 | 1  |
| MSTRG. 17368. 4  | 1168 | 0. 44611 | 8. 467224121 | 1  |
| MSTRG. 17368. 5  | 1162 | 0. 44611 | 8. 339782715 | 1  |
| MSTRG. 17368. 7  | 1548 | 0. 41057 | 8. 659606934 | 1  |
| MSTRG. 17368. 12 | 1612 | 0. 41057 | 8. 54510498  | 1  |
| MSTRG. 17369. 1  | 129  | 0. 34131 | 8. 334289551 | 1  |
| MSTRG. 17368. 13 | 102  | 0. 31732 | 8. 676574707 | 1  |
| MSTRG. 17368. 14 | 226  | 0. 35415 | 8. 862854004 | 1  |
| MSTRG. 17364. 3  | 180  | 0. 28467 | 6. 059143066 | 1  |
| MSTRG. 17366. 1  | 529  | 0. 28683 | 6. 144104004 | 1  |
| MSTRG. 17370. 2  | 270  | 0. 32072 | 8. 54107666  | 1  |
| MSTRG. 17371. 2  | 582  | 0. 40144 | 8. 845397949 | 1  |
| MSTRG. 17372. 1  | 182  | 0. 27937 | 6. 755310059 | 1  |
| MSTRG. 17370. 3  | 123  | 0. 30559 | 4. 446350098 | 1  |
| MSTRG. 17373. 1  | 151  | 0. 33994 | 5. 238220215 | 1  |
| MSTRG. 17374. 1  | 109  | 0. 29268 | 7. 714904785 | 1  |
| MSTRG. 17370. 4  | 192  | 0. 29268 | 9. 43182373  | 1  |
| MSTRG. 17370. 5  | 192  | 0. 31753 | 9. 43182373  | 1  |
| MSTRG. 17370. 6  | 120  | 0. 29526 | 8. 763366699 | 1  |
| MSTRG. 17370. 7  | 68   | 0. 35099 | 7. 701599121 | 1  |
| MSTRG. 17370. 8  | 116  | 0. 32138 | 9. 44342041  | 1  |
| MSTRG. 17370. 9  | 212  | 0. 29772 | 9. 916931152 | 1  |
| MSTRG. 17375. 1  | 53   | 0. 45278 | 9. 273986816 | 1  |
| MSTRG. 17370. 10 | 75   | 0. 28248 | 10. 01678467 | 1  |
| MSTRG. 17379. 1  | 1061 | 0. 44491 | 8. 562438965 | 1  |
| MSTRG. 17379. 13 | 104  | 0. 38386 | 6. 860900879 | 1  |
| MSTRG. 17379. 14 | 997  | 0. 45846 | 8. 529724121 | 1  |
| MSTRG. 17379. 12 | 902  | 0. 4778  | 8. 470031738 | 1  |

|                  |      |          |               |    |
|------------------|------|----------|---------------|----|
| MSTRG. 17379. 8  | 1046 | 0. 44119 | 8. 645202637  | 1  |
| MSTRG. 17379. 10 | 1046 | 0. 44119 | 8. 645202637  | 1  |
| MSTRG. 17379. 11 | 1059 | 0. 44119 | 8. 562438965  | 1  |
| MSTRG. 17379. 15 | 940  | 0. 36917 | 9. 063415527  | 1  |
| MSTRG. 17380. 1  | 74   | 0. 30303 | 6. 716125488  | 1  |
| MSTRG. 17381. 1  | 91   | 0. 28923 | 4. 427185059  | -1 |
| MSTRG. 17387. 2  | 114  | 0. 42535 | 4. 771057129  | 1  |
| MSTRG. 17397. 1  | 102  | 0. 38551 | 9. 85357666   | -1 |
| MSTRG. 17438. 3  | 557  | 0. 46494 | 5. 054504395  | 1  |
| MSTRG. 17438. 6  | 868  | 0. 46751 | 5. 817443848  | 1  |
| MSTRG. 17438. 7  | 872  | 0. 47003 | 5. 854675293  | 1  |
| MSTRG. 17438. 8  | 871  | 0. 48848 | 5. 886901855  | 1  |
| MSTRG. 17438. 9  | 557  | 0. 35496 | 5. 054504395  | 1  |
| MSTRG. 17438. 10 | 730  | 0. 43311 | 5. 19732666   | 1  |
| MSTRG. 17438. 11 | 394  | 0. 44467 | 4. 985412598  | 1  |
| MSTRG. 17437. 1  | 71   | 0. 35844 | 5. 179870605  | 1  |
| MSTRG. 17441. 1  | 481  | 0. 43698 | 5. 690002441  | 1  |
| MSTRG. 17441. 2  | 481  | 0. 46121 | 5. 690002441  | 1  |
| MSTRG. 17441. 3  | 42   | 0. 35849 | 4. 777893066  | 1  |
| MSTRG. 17462. 1  | 98   | 0. 29088 | 9. 763122559  | 1  |
| MSTRG. 17463. 1  | 59   | 0. 26994 | 6. 204772949  | 1  |
| MSTRG. 17464. 1  | 129  | 0. 29791 | 8. 135559082  | 1  |
| MSTRG. 17464. 4  | 53   | 0. 3227  | 6. 503234863  | -1 |
| MSTRG. 17465. 1  | 264  | 0. 28151 | 9. 925354004  | 1  |
| MSTRG. 17467. 1  | 77   | 0. 39661 | 5. 376037598  | 1  |
| MSTRG. 17469. 1  | 125  | 0. 31873 | 9. 301452637  | 1  |
| MSTRG. 17470. 1  | 104  | 0. 32237 | 4. 818786621  | 1  |
| MSTRG. 17471. 1  | 34   | 0. 35823 | 9. 698059082  | 1  |
| MSTRG. 17474. 1  | 164  | 0. 29367 | 8. 946472168  | 1  |
| MSTRG. 17475. 1  | 119  | 0. 29187 | 9. 450500488  | 1  |
| MSTRG. 17475. 2  | 121  | 0. 29268 | 7. 769348145  | 1  |
| MSTRG. 17475. 3  | 63   | 0. 29772 | 10. 38604736  | 1  |
| MSTRG. 17476. 1  | 151  | 0. 34787 | 9. 751647949  | 1  |
| MSTRG. 17477. 1  | 97   | 0. 32396 | 9. 019104004  | 1  |
| MSTRG. 17478. 1  | 63   | 0. 31161 | 10. 28448486  | 1  |
| MSTRG. 17464. 12 | 1620 | 0. 48049 | 6. 702087402  | 1  |
| MSTRG. 17464. 11 | 1086 | 0. 4127  | 9. 046325684  | 1  |
| MSTRG. 17464. 10 | 1060 | 0. 42351 | 9. 18572998   | 1  |
| MSTRG. 17464. 14 | 1520 | 0. 42714 | 6. 27520752   | 1  |
| MSTRG. 17464. 16 | 166  | 0. 31437 | 5. 016784668  | 1  |
| MSTRG. 17480. 1  | 159  | 0. 29703 | 10. 52655029  | 1  |
| MSTRG. 17481. 1  | 1951 | 0. 43447 | 7. 99786377   | 1  |
| MSTRG. 17481. 4  | 1952 | 0. 41907 | 7. 99786377   | 1  |
| MSTRG. 17481. 5  | 1952 | 0. 43447 | 7. 99786377   | 1  |
| MSTRG. 17481. 7  | 1951 | 0. 41907 | 7. 99786377   | 1  |
| MSTRG. 17481. 6  | 1952 | 0. 45497 | 7. 99786377   | 1  |
| MSTRG. 17446. 1  | 82   | 0. 38268 | 9. 88848877   | 1  |
| MSTRG. 17450. 1  | 1429 | 0. 45154 | 8. 947570801  | 1  |
| MSTRG. 17454. 1  | 573  | 0. 4758  | 5. 160583496  | 1  |
| MSTRG. 17454. 3  | 572  | 0. 44331 | 5. 160583496  | 1  |
| MSTRG. 17456. 2  | 870  | 0. 43108 | 8. 7444445801 | 1  |
| MSTRG. 17456. 3  | 870  | 0. 43356 | 8. 7444445801 | 1  |
| MSTRG. 17456. 4  | 870  | 0. 43356 | 8. 7444445801 | 1  |
| MSTRG. 17456. 5  | 870  | 0. 43642 | 8. 7444445801 | 1  |

|                  |      |          |              |    |
|------------------|------|----------|--------------|----|
| MSTRG. 17453. 2  | 237  | 0. 46502 | 7. 211120605 | 1  |
| MSTRG. 17458. 3  | 392  | 0. 47395 | 5. 645080566 | 1  |
| MSTRG. 17524. 1  | 415  | 0. 31641 | 9. 487609863 | 1  |
| MSTRG. 17528. 1  | 1041 | 0. 38151 | 9. 00579834  | 1  |
| MSTRG. 17528. 3  | 1026 | 0. 44572 | 9. 040710449 | 1  |
| MSTRG. 17528. 2  | 1026 | 0. 44734 | 9. 040710449 | 1  |
| MSTRG. 17528. 5  | 922  | 0. 38119 | 9. 383361816 | 1  |
| MSTRG. 17529. 1  | 96   | 0. 42798 | 9. 142150879 | 1  |
| MSTRG. 17530. 1  | 96   | 0. 37029 | 6. 897399902 | 1  |
| MSTRG. 17531. 1  | 90   | 0. 37206 | 7. 128479004 | 1  |
| MSTRG. 17528. 6  | 182  | 0. 29088 | 9. 975646973 | 1  |
| MSTRG. 17528. 7  | 132  | 0. 29367 | 9. 389221191 | 1  |
| MSTRG. 17528. 8  | 177  | 0. 28584 | 10. 48040771 | 1  |
| MSTRG. 17528. 9  | 94   | 0. 29772 | 11. 1272583  | 1  |
| MSTRG. 17532. 1  | 150  | 0. 32642 | 5. 226257324 | 1  |
| MSTRG. 17532. 2  | 97   | 0. 34971 | 8. 800720215 | 1  |
| MSTRG. 17532. 3  | 152  | 0. 29607 | 10. 1428833  | 1  |
| MSTRG. 17528. 10 | 122  | 0. 30309 | 10. 1104126  | 1  |
| MSTRG. 17528. 11 | 123  | 0. 28584 | 6. 49005127  | 1  |
| MSTRG. 17533. 1  | 67   | 0. 32573 | 6. 568664551 | 1  |
| MSTRG. 17528. 12 | 140  | 0. 29772 | 9. 69342041  | 1  |
| MSTRG. 17528. 13 | 140  | 0. 29772 | 9. 69342041  | 1  |
| MSTRG. 17528. 14 | 140  | 0. 29772 | 9. 69342041  | 1  |
| MSTRG. 17528. 15 | 98   | 0. 29772 | 5. 805847168 | 1  |
| MSTRG. 17528. 16 | 98   | 0. 29772 | 5. 805847168 | 1  |
| MSTRG. 17528. 17 | 122  | 0. 32396 | 9. 881774902 | 1  |
| MSTRG. 17528. 18 | 177  | 0. 28667 | 10. 48040771 | 1  |
| MSTRG. 17535. 1  | 75   | 0. 3524  | 4. 633850098 | 1  |
| MSTRG. 17528. 19 | 122  | 0. 27622 | 9. 881774902 | 1  |
| MSTRG. 17528. 20 | 115  | 0. 40155 | 10. 75445557 | 1  |
| MSTRG. 17536. 1  | 167  | 0. 40485 | 10. 53594971 | 1  |
| MSTRG. 17528. 21 | 122  | 0. 38163 | 9. 881774902 | 1  |
| MSTRG. 17459. 2  | 131  | 0. 47544 | 7. 888977051 | 1  |
| MSTRG. 17482. 3  | 181  | 0. 30492 | 11. 44927979 | 1  |
| MSTRG. 17482. 4  | 188  | 0. 32727 | 5. 377990723 | 1  |
| MSTRG. 17490. 2  | 386  | 0. 47656 | 5. 165710449 | 1  |
| MSTRG. 17490. 5  | 266  | 0. 32498 | 5. 84954834  | 1  |
| MSTRG. 17490. 4  | 360  | 0. 2971  | 8. 198669434 | 1  |
| MSTRG. 17460. 3  | 88   | 0. 3592  | 9. 276550293 | 1  |
| MSTRG. 17496. 2  | 282  | 0. 45413 | 9. 789367676 | 1  |
| MSTRG. 17498. 2  | 345  | 0. 40306 | 7. 663146973 | 1  |
| MSTRG. 17498. 3  | 321  | 0. 40306 | 9. 149841309 | 1  |
| MSTRG. 17539. 1  | 2441 | 0. 40356 | 5. 307922363 | 1  |
| MSTRG. 17539. 2  | 1209 | 0. 45577 | 5. 325378418 | -1 |
| MSTRG. 17541. 1  | 188  | 0. 32413 | 10. 15460205 | 1  |
| MSTRG. 17541. 2  | 382  | 0. 3076  | 6. 42401123  | 1  |
| MSTRG. 17541. 3  | 320  | 0. 48161 | 8. 40447998  | 1  |
| MSTRG. 17541. 4  | 320  | 0. 45318 | 8. 40447998  | 1  |
| MSTRG. 17541. 5  | 320  | 0. 42735 | 8. 40447998  | 1  |
| MSTRG. 17541. 6  | 306  | 0. 43171 | 7. 61932373  | 1  |
| MSTRG. 17541. 7  | 237  | 0. 3995  | 6. 428649902 | 1  |
| MSTRG. 17546. 1  | 131  | 0. 35655 | 9. 815612793 | 1  |
| MSTRG. 17541. 8  | 188  | 0. 29595 | 7. 673400879 | 1  |
| MSTRG. 17548. 1  | 68   | 0. 35161 | 10. 00543213 | 1  |

|                  |      |          |              |   |
|------------------|------|----------|--------------|---|
| MSTRG. 17550. 1  | 145  | 0. 26969 | 10. 18988037 | 1 |
| MSTRG. 17551. 1  | 288  | 0. 43994 | 9. 29888916  | 1 |
| MSTRG. 17551. 2  | 192  | 0. 46256 | 8. 975036621 | 1 |
| MSTRG. 17552. 1  | 124  | 0. 28808 | 9. 250549316 | 1 |
| MSTRG. 17553. 1  | 66   | 0. 36259 | 9. 438293457 | 1 |
| MSTRG. 17557. 1  | 1455 | 0. 43167 | 6. 014831543 | 1 |
| MSTRG. 17512. 2  | 593  | 0. 44154 | 7. 016418457 | 1 |
| MSTRG. 17515. 1  | 69   | 0. 30136 | 5. 102478027 | 1 |
| MSTRG. 17516. 3  | 64   | 0. 42146 | 5. 164367676 | 1 |
| MSTRG. 17516. 4  | 742  | 0. 37006 | 8. 826477051 | 1 |
| MSTRG. 17516. 5  | 596  | 0. 29615 | 9. 315368652 | 1 |
| MSTRG. 17523. 6  | 431  | 0. 36519 | 6. 815124512 | 1 |
| MSTRG. 17523. 4  | 431  | 0. 34303 | 6. 815124512 | 1 |
| MSTRG. 17523. 7  | 431  | 0. 34303 | 6. 815124512 | 1 |
| MSTRG. 17523. 5  | 793  | 0. 42859 | 8. 694152832 | 1 |
| MSTRG. 17523. 8  | 845  | 0. 43045 | 7. 923522949 | 1 |
| MSTRG. 17559. 1  | 495  | 0. 38365 | 4. 586608887 | 1 |
| MSTRG. 17559. 3  | 629  | 0. 44961 | 5. 824035645 | 1 |
| MSTRG. 17559. 4  | 613  | 0. 39806 | 5. 519104004 | 1 |
| MSTRG. 17559. 5  | 411  | 0. 34993 | 9. 216247559 | 1 |
| MSTRG. 17559. 7  | 411  | 0. 386   | 9. 216247559 | 1 |
| MSTRG. 17559. 6  | 411  | 0. 34055 | 9. 216247559 | 1 |
| MSTRG. 17559. 8  | 115  | 0. 32478 | 9. 015075684 | 1 |
| MSTRG. 17560. 1  | 123  | 0. 32044 | 5. 690979004 | 1 |
| MSTRG. 17560. 2  | 75   | 0. 32296 | 8. 932678223 | 1 |
| MSTRG. 17566. 3  | 156  | 0. 33078 | 9. 04486084  | 1 |
| MSTRG. 17566. 5  | 165  | 0. 32429 | 9. 206848145 | 1 |
| MSTRG. 17567. 1  | 280  | 0. 36783 | 9. 589904785 | 1 |
| MSTRG. 17567. 2  | 245  | 0. 36004 | 9. 691345215 | 1 |
| MSTRG. 17568. 1  | 233  | 0. 29772 | 8. 082580566 | 1 |
| MSTRG. 17579. 1  | 107  | 0. 30197 | 6. 000427246 | 1 |
| MSTRG. 17580. 1  | 1792 | 0. 45042 | 6. 351135254 | 1 |
| MSTRG. 17580. 3  | 1672 | 0. 43622 | 7. 547912598 | 1 |
| MSTRG. 17580. 2  | 1773 | 0. 46579 | 6. 334899902 | 1 |
| MSTRG. 17580. 4  | 1762 | 0. 49816 | 6. 307189941 | 1 |
| MSTRG. 17580. 6  | 1114 | 0. 46795 | 6. 481750488 | 1 |
| MSTRG. 17581. 2  | 21   | 0. 44663 | 4. 20916748  | 1 |
| MSTRG. 17581. 1  | 21   | 0. 44529 | 4. 20916748  | 1 |
| MSTRG. 17581. 3  | 49   | 0. 46166 | 9. 383239746 | 1 |
| MSTRG. 17582. 1  | 195  | 0. 29772 | 6. 599914551 | 1 |
| MSTRG. 17582. 2  | 75   | 0. 30894 | 9. 299255371 | 1 |
| MSTRG. 17580. 8  | 132  | 0. 28338 | 11. 8682251  | 1 |
| MSTRG. 17580. 9  | 98   | 0. 29526 | 9. 678771973 | 1 |
| MSTRG. 17580. 10 | 87   | 0. 28662 | 6. 681335449 | 1 |
| MSTRG. 17580. 11 | 183  | 0. 28419 | 10. 56842041 | 1 |
| MSTRG. 17571. 1  | 1305 | 0. 39917 | 7. 657409668 | 1 |
| MSTRG. 17572. 1  | 98   | 0. 33107 | 9. 299255371 | 1 |
| MSTRG. 17571. 3  | 1248 | 0. 39316 | 7. 37677002  | 1 |
| MSTRG. 17571. 4  | 1248 | 0. 40951 | 7. 37677002  | 1 |
| MSTRG. 17571. 5  | 1305 | 0. 38377 | 7. 657409668 | 1 |
| MSTRG. 17575. 1  | 27   | 0. 39372 | 6. 700866699 | 1 |
| MSTRG. 17577. 1  | 49   | 0. 3328  | 9. 773132324 | 1 |
| MSTRG. 17577. 2  | 49   | 0. 31642 | 9. 773132324 | 1 |
| MSTRG. 17584. 1  | 49   | 0. 28977 | 9. 579040527 | 1 |

|                  |      |          |              |    |
|------------------|------|----------|--------------|----|
| MSTRG. 17585. 9  | 368  | 0. 2921  | 9. 787414551 | 1  |
| MSTRG. 17585. 8  | 646  | 0. 35945 | 9. 50201416  | 1  |
| MSTRG. 17585. 5  | 601  | 0. 37979 | 9. 418640137 | 1  |
| MSTRG. 17585. 12 | 543  | 0. 33723 | 9. 524841309 | 1  |
| MSTRG. 17585. 15 | 368  | 0. 29374 | 9. 787414551 | 1  |
| MSTRG. 17585. 16 | 368  | 0. 28165 | 9. 787414551 | 1  |
| MSTRG. 17585. 13 | 601  | 0. 40897 | 9. 418640137 | 1  |
| MSTRG. 17585. 14 | 601  | 0. 36593 | 9. 418640137 | 1  |
| MSTRG. 17585. 17 | 646  | 0. 37331 | 9. 50201416  | 1  |
| MSTRG. 17585. 18 | 471  | 0. 3556  | 9. 690734863 | 1  |
| MSTRG. 17590. 2  | 404  | 0. 41337 | 8. 913146973 | 1  |
| MSTRG. 17590. 3  | 569  | 0. 45713 | 7. 47454834  | 1  |
| MSTRG. 17590. 6  | 396  | 0. 44185 | 6. 104064941 | 1  |
| MSTRG. 17592. 1  | 135  | 0. 3208  | 8. 088195801 | 1  |
| MSTRG. 17597. 2  | 94   | 0. 34467 | 9. 359802246 | 1  |
| MSTRG. 17602. 1  | 80   | 0. 45889 | 5. 479431152 | 1  |
| MSTRG. 17615. 1  | 130  | 0. 30862 | 6. 374328613 | -1 |
| MSTRG. 17615. 2  | 117  | 0. 33487 | 5. 720031738 | -1 |
| MSTRG. 17615. 15 | 590  | 0. 40661 | 5. 62677002  | 1  |
| MSTRG. 17615. 5  | 757  | 0. 44853 | 5. 452087402 | 1  |
| MSTRG. 17615. 18 | 116  | 0. 28121 | 8. 719177246 | 1  |
| MSTRG. 17605. 2  | 148  | 0. 46729 | 8. 621276855 | 1  |
| MSTRG. 17605. 3  | 148  | 0. 48875 | 8. 621276855 | 1  |
| MSTRG. 17608. 6  | 1441 | 0. 42729 | 8. 981872559 | 1  |
| MSTRG. 17608. 8  | 1411 | 0. 42729 | 8. 915710449 | 1  |
| MSTRG. 17608. 4  | 1421 | 0. 44115 | 8. 939025879 | 1  |
| MSTRG. 17608. 5  | 1431 | 0. 44115 | 8. 960998535 | 1  |
| MSTRG. 17608. 7  | 1471 | 0. 44115 | 9. 038391113 | 1  |
| MSTRG. 17608. 9  | 1509 | 0. 43345 | 9. 208190918 | 1  |
| MSTRG. 17608. 2  | 1351 | 0. 42729 | 8. 738586426 | 1  |
| MSTRG. 17607. 1  | 110  | 0. 29961 | 8. 258972168 | 1  |
| MSTRG. 17619. 1  | 634  | 0. 42449 | 9. 089904785 | 1  |
| MSTRG. 17622. 1  | 656  | 0. 33883 | 7. 946960449 | 1  |
| MSTRG. 17622. 2  | 601  | 0. 37319 | 7. 802062988 | 1  |
| MSTRG. 17619. 3  | 83   | 0. 32097 | 5. 096984863 | 1  |
| MSTRG. 17622. 8  | 673  | 0. 43419 | 7. 950866699 | 1  |
| MSTRG. 17622. 9  | 673  | 0. 43419 | 7. 950866699 | 1  |
| MSTRG. 17622. 11 | 618  | 0. 47078 | 7. 810241699 | 1  |
| MSTRG. 17628. 2  | 202  | 0. 38695 | 8. 729064941 | 1  |
| MSTRG. 17629. 1  | 131  | 0. 34116 | 5. 015075684 | 1  |
| MSTRG. 17631. 2  | 767  | 0. 47468 | 6. 663757324 | 1  |
| MSTRG. 17631. 3  | 767  | 0. 48024 | 6. 663757324 | 1  |
| MSTRG. 17631. 4  | 767  | 0. 44865 | 6. 663757324 | 1  |
| MSTRG. 17624. 1  | 158  | 0. 48815 | 9. 971984863 | 1  |
| MSTRG. 17635. 2  | 578  | 0. 44496 | 4. 731384277 | 1  |
| MSTRG. 17635. 1  | 335  | 0. 36759 | 4. 82635498  | 1  |
| MSTRG. 17635. 3  | 578  | 0. 44496 | 4. 731384277 | 1  |
| MSTRG. 17636. 1  | 166  | 0. 26594 | 8. 840881348 | 1  |
| MSTRG. 17635. 4  | 464  | 0. 37351 | 4. 649353027 | 1  |
| MSTRG. 17635. 6  | 464  | 0. 41467 | 4. 649353027 | 1  |
| MSTRG. 17635. 7  | 464  | 0. 41467 | 4. 649353027 | 1  |
| MSTRG. 17635. 9  | 464  | 0. 42701 | 4. 649353027 | 1  |
| MSTRG. 17635. 10 | 83   | 0. 30446 | 7. 54486084  | 1  |
| MSTRG. 17638. 1  | 125  | 0. 29332 | 8. 361877441 | 1  |



|                  |      |          |              |   |
|------------------|------|----------|--------------|---|
| MSTRG. 17639. 1  | 105  | 0. 27911 | 8. 834899902 | 1 |
| MSTRG. 17640. 1  | 95   | 0. 36792 | 10. 40228271 | 1 |
| MSTRG. 17641. 1  | 89   | 0. 31641 | 9. 836608887 | 1 |
| MSTRG. 17635. 12 | 157  | 0. 29059 | 11. 60772705 | 1 |
| MSTRG. 17632. 2  | 571  | 0. 42886 | 6. 633239746 | 1 |
| MSTRG. 17632. 3  | 571  | 0. 4473  | 6. 633239746 | 1 |
| MSTRG. 17643. 2  | 94   | 0. 46298 | 5. 363952637 | 1 |
| MSTRG. 17643. 3  | 66   | 0. 3926  | 4. 499572754 | 1 |
| MSTRG. 17645. 3  | 1221 | 0. 47508 | 5. 687072754 | 1 |
| MSTRG. 17645. 7  | 254  | 0. 31437 | 5. 445129395 | 1 |
| MSTRG. 17647. 1  | 1886 | 0. 34584 | 5. 917907715 | 1 |
| MSTRG. 17647. 2  | 1873 | 0. 46322 | 5. 944641113 | 1 |
| MSTRG. 17647. 3  | 1886 | 0. 3802  | 5. 917907715 | 1 |
| MSTRG. 17647. 4  | 1886 | 0. 40523 | 5. 917907715 | 1 |
| MSTRG. 17648. 2  | 728  | 0. 44991 | 5. 64630127  | 1 |
| MSTRG. 17653. 1  | 70   | 0. 31521 | 8. 95904541  | 1 |
| MSTRG. 17654. 1  | 107  | 0. 30221 | 10. 85491943 | 1 |
| MSTRG. 17660. 1  | 220  | 0. 27403 | 5. 593811035 | 1 |
| MSTRG. 17661. 3  | 135  | 0. 46741 | 9. 65814209  | 1 |
| MSTRG. 17661. 4  | 135  | 0. 46379 | 9. 65814209  | 1 |
| MSTRG. 17663. 2  | 74   | 0. 40263 | 10. 21832275 | 1 |
| MSTRG. 17665. 2  | 91   | 0. 46208 | 6. 944763184 | 1 |
| MSTRG. 17667. 2  | 145  | 0. 40736 | 8. 916687012 | 1 |
| MSTRG. 17669. 1  | 64   | 0. 31391 | 9. 004211426 | 1 |
| MSTRG. 17670. 1  | 37   | 0. 43581 | 8. 939147949 | 1 |
| MSTRG. 17672. 1  | 47   | 0. 36033 | 10. 71795654 | 1 |
| MSTRG. 17674. 2  | 202  | 0. 3495  | 9. 440002441 | 1 |
| MSTRG. 17674. 1  | 202  | 0. 33576 | 9. 440002441 | 1 |
| MSTRG. 17674. 3  | 202  | 0. 33576 | 9. 440002441 | 1 |
| MSTRG. 17677. 1  | 288  | 0. 32718 | 5. 737731934 | 1 |
| MSTRG. 17677. 3  | 343  | 0. 37611 | 5. 345275879 | 1 |
| MSTRG. 17679. 2  | 348  | 0. 34883 | 5. 526306152 | 1 |
| MSTRG. 17676. 2  | 218  | 0. 35821 | 8. 315124512 | 1 |
| MSTRG. 17681. 1  | 266  | 0. 41763 | 5. 349182129 | 1 |
| MSTRG. 17681. 3  | 456  | 0. 43213 | 6. 479797363 | 1 |
| MSTRG. 17682. 2  | 239  | 0. 40827 | 5. 61138916  | 1 |
| MSTRG. 17685. 2  | 370  | 0. 38339 | 8. 607116699 | 1 |
| MSTRG. 17686. 1  | 151  | 0. 33442 | 10. 92132568 | 1 |
| MSTRG. 17706. 6  | 2279 | 0. 47742 | 5. 753112793 | 1 |
| MSTRG. 17706. 4  | 2655 | 0. 42204 | 6. 032409668 | 1 |
| MSTRG. 17706. 5  | 2661 | 0. 46452 | 6. 049987793 | 1 |
| MSTRG. 17706. 8  | 2394 | 0. 45816 | 5. 987243652 | 1 |
| MSTRG. 17706. 7  | 2394 | 0. 46452 | 5. 987243652 | 1 |
| MSTRG. 17706. 9  | 2394 | 0. 41819 | 5. 987243652 | 1 |
| MSTRG. 17706. 12 | 2313 | 0. 35797 | 5. 731994629 | 1 |
| MSTRG. 17706. 14 | 2382 | 0. 45644 | 6. 00604248  | 1 |
| MSTRG. 17706. 11 | 2394 | 0. 47661 | 5. 987243652 | 1 |
| MSTRG. 17706. 10 | 2629 | 0. 45892 | 6. 18939209  | 1 |
| MSTRG. 17706. 16 | 2313 | 0. 44276 | 5. 731994629 | 1 |
| MSTRG. 17706. 18 | 2313 | 0. 44357 | 5. 731994629 | 1 |
| MSTRG. 17706. 17 | 2394 | 0. 45892 | 5. 987243652 | 1 |
| MSTRG. 17706. 19 | 2301 | 0. 45644 | 5. 742492676 | 1 |
| MSTRG. 17706. 20 | 2382 | 0. 45568 | 6. 00604248  | 1 |
| MSTRG. 17706. 22 | 467  | 0. 43113 | 9. 765197754 | 1 |

|                  |      |          |              |    |
|------------------|------|----------|--------------|----|
| MSTRG. 17706. 23 | 107  | 0. 32653 | 6. 005554199 | 1  |
| MSTRG. 17695. 1  | 323  | 0. 38122 | 7. 649108887 | 1  |
| MSTRG. 17697. 1  | 72   | 0. 35165 | 10. 3817749  | -1 |
| MSTRG. 17698. 2  | 254  | 0. 42582 | 8. 92755127  | 1  |
| MSTRG. 17698. 3  | 254  | 0. 4692  | 8. 92755127  | 1  |
| MSTRG. 17701. 2  | 267  | 0. 32439 | 8. 030700684 | 1  |
| MSTRG. 17702. 1  | 19   | 0. 40852 | 5. 934875488 | 1  |
| MSTRG. 17710. 3  | 1032 | 0. 46824 | 6. 043762207 | 1  |
| MSTRG. 17710. 4  | 1031 | 0. 46824 | 6. 043762207 | 1  |
| MSTRG. 17710. 6  | 908  | 0. 46422 | 5. 601379395 | 1  |
| MSTRG. 17711. 4  | 93   | 0. 40365 | 8. 475524902 | 1  |
| MSTRG. 17711. 2  | 832  | 0. 43249 | 6. 919372559 | 1  |
| MSTRG. 17709. 1  | 85   | 0. 455   | 7. 799133301 | 1  |
| MSTRG. 17714. 1  | 455  | 0. 28119 | 6. 247253418 | 1  |
| MSTRG. 17714. 4  | 456  | 0. 3669  | 6. 247253418 | 1  |
| MSTRG. 17718. 2  | 703  | 0. 33921 | 8. 948181152 | 1  |
| MSTRG. 17718. 3  | 225  | 0. 36678 | 8. 408508301 | -1 |
| MSTRG. 17730. 1  | 97   | 0. 33194 | 9. 545471191 | 1  |
| MSTRG. 17731. 1  | 97   | 0. 28167 | 9. 384216309 | 1  |
| MSTRG. 17731. 2  | 36   | 0. 38104 | 6. 469787598 | 1  |
| MSTRG. 17729. 6  | 186  | 0. 27591 | 11. 25775146 | 1  |
| MSTRG. 17729. 4  | 1449 | 0. 42121 | 6. 609069824 | 1  |
| MSTRG. 17729. 5  | 1539 | 0. 42121 | 7. 371765137 | 1  |
| MSTRG. 17729. 7  | 1409 | 0. 48595 | 6. 550598145 | 1  |
| MSTRG. 17729. 8  | 1449 | 0. 47122 | 6. 609069824 | 1  |
| MSTRG. 17729. 9  | 119  | 0. 27782 | 11. 92156982 | 1  |
| MSTRG. 17732. 1  | 128  | 0. 2849  | 8. 639709473 | 1  |
| MSTRG. 17729. 10 | 139  | 0. 38158 | 8. 963806152 | 1  |
| MSTRG. 17733. 7  | 445  | 0. 3174  | 8. 899841309 | 1  |
| MSTRG. 17733. 10 | 527  | 0. 37221 | 8. 682067871 | 1  |
| MSTRG. 17733. 12 | 548  | 0. 38787 | 9. 155090332 | 1  |
| MSTRG. 17733. 11 | 527  | 0. 41657 | 8. 682067871 | 1  |
| MSTRG. 17725. 2  | 178  | 0. 34314 | 9. 347595215 | 1  |
| MSTRG. 17728. 1  | 86   | 0. 37831 | 9. 114440918 | 1  |
| MSTRG. 17735. 2  | 41   | 0. 32103 | 10. 26641846 | 1  |
| MSTRG. 17740. 2  | 333  | 0. 39485 | 8. 881652832 | 1  |
| MSTRG. 17741. 4  | 58   | 0. 30303 | 4. 352478027 | 1  |
| MSTRG. 17741. 5  | 210  | 0. 36855 | 6. 153869629 | 1  |
| MSTRG. 17741. 6  | 189  | 0. 3     | 5. 953308105 | 1  |
| MSTRG. 17744. 1  | 38   | 0. 31573 | 9. 414611816 | 1  |
| MSTRG. 17751. 2  | 360  | 0. 44005 | 5. 414245605 | 1  |
| MSTRG. 17755. 2  | 191  | 0. 41018 | 9. 320617676 | 1  |
| MSTRG. 17755. 3  | 203  | 0. 39664 | 9. 165100098 | 1  |
| MSTRG. 17747. 1  | 123  | 0. 30725 | 9. 030334473 | 1  |
| MSTRG. 17762. 1  | 5    | 0. 31261 | 5. 274597168 | 1  |
| MSTRG. 17775. 2  | 129  | 0. 31213 | 9. 804748535 | 1  |
| MSTRG. 17776. 2  | 173  | 0. 27403 | 9. 851501465 | 1  |
| MSTRG. 17779. 1  | 370  | 0. 28923 | 6. 605163574 | 1  |
| MSTRG. 17779. 2  | 529  | 0. 28718 | 5. 974060059 | 1  |
| MSTRG. 17779. 4  | 370  | 0. 28923 | 6. 605163574 | 1  |
| MSTRG. 17779. 5  | 529  | 0. 28648 | 5. 974060059 | 1  |
| MSTRG. 17779. 10 | 528  | 0. 2785  | 6. 06817627  | 1  |
| MSTRG. 17779. 11 | 370  | 0. 28443 | 6. 605163574 | 1  |
| MSTRG. 17768. 1  | 604  | 0. 46661 | 4. 467224121 | 1  |

|                 |      |          |              |    |
|-----------------|------|----------|--------------|----|
| MSTRG. 17769. 3 | 233  | 0. 43487 | 9. 233703613 | 1  |
| MSTRG. 17770. 2 | 84   | 0. 34148 | 8. 967224121 | 1  |
| MSTRG. 17770. 3 | 84   | 0. 4054  | 8. 967224121 | 1  |
| MSTRG. 17773. 1 | 153  | 0. 29607 | 9. 458679199 | 1  |
| MSTRG. 17773. 2 | 1415 | 0. 36405 | 7. 628723145 | 1  |
| MSTRG. 17773. 3 | 191  | 0. 29772 | 9. 399475098 | 1  |
| MSTRG. 17774. 1 | 34   | 0. 3724  | 9. 875427246 | 1  |
| MSTRG. 17781. 2 | 97   | 0. 3295  | 9. 785705566 | 1  |
| MSTRG. 17781. 3 | 665  | 0. 30729 | 8. 589172363 | 1  |
| MSTRG. 17782. 1 | 93   | 0. 29772 | 10. 58758545 | 1  |
| MSTRG. 17784. 3 | 869  | 0. 46941 | 7. 291809082 | 1  |
| MSTRG. 17785. 2 | 109  | 0. 37624 | 10. 7276001  | -1 |
| MSTRG. 17785. 3 | 125  | 0. 32473 | 9. 831237793 | 1  |
| MSTRG. 17789. 1 | 537  | 0. 37639 | 6. 757019043 | 1  |
| MSTRG. 17789. 4 | 537  | 0. 39689 | 6. 757019043 | 1  |
| MSTRG. 17789. 6 | 509  | 0. 3736  | 6. 928771973 | 1  |
| MSTRG. 17791. 6 | 640  | 0. 42076 | 8. 826477051 | 1  |
| MSTRG. 17791. 5 | 640  | 0. 45666 | 8. 826477051 | 1  |
| MSTRG. 17791. 4 | 640  | 0. 42827 | 8. 826477051 | 1  |
| MSTRG. 17792. 1 | 119  | 0. 26749 | 8. 573669434 | 1  |
| MSTRG. 17796. 2 | 585  | 0. 44906 | 6. 466003418 | 1  |
| MSTRG. 17794. 1 | 657  | 0. 44733 | 5. 657897949 | 1  |
| MSTRG. 17802. 1 | 79   | 0. 46102 | 8. 73651123  | 1  |
| MSTRG. 17807. 1 | 583  | 0. 40392 | 9. 433532715 | 1  |
| MSTRG. 17806. 1 | 47   | 0. 33123 | 5. 477600098 | 1  |
| MSTRG. 17814. 1 | 248  | 0. 44877 | 4. 910217285 | 1  |
| MSTRG. 17814. 2 | 134  | 0. 29526 | 9. 948791504 | 1  |
| MSTRG. 17816. 1 | 83   | 0. 32217 | 9. 300964355 | 1  |
| MSTRG. 17814. 6 | 373  | 0. 36267 | 5. 719421387 | 1  |
| MSTRG. 17814. 4 | 370  | 0. 36432 | 5. 84552002  | 1  |
| MSTRG. 17814. 5 | 416  | 0. 35058 | 8. 042419434 | 1  |
| MSTRG. 17817. 2 | 95   | 0. 41221 | 4. 999450684 | 1  |
| MSTRG. 17817. 1 | 218  | 0. 35559 | 6. 640319824 | 1  |
| MSTRG. 17817. 3 | 218  | 0. 39178 | 6. 640319824 | 1  |
| MSTRG. 17810. 2 | 432  | 0. 39815 | 9. 232849121 | 1  |
| MSTRG. 17811. 3 | 263  | 0. 42323 | 10. 62506104 | 1  |
| MSTRG. 17825. 4 | 903  | 0. 35844 | 9. 809509277 | 1  |
| MSTRG. 17826. 4 | 527  | 0. 45784 | 7. 245300293 | 1  |
| MSTRG. 17826. 3 | 470  | 0. 43771 | 9. 309387207 | 1  |
| MSTRG. 17826. 2 | 491  | 0. 44554 | 9. 152038574 | 1  |
| MSTRG. 17826. 7 | 192  | 0. 45023 | 5. 191467285 | 1  |
| MSTRG. 17826. 8 | 213  | 0. 4197  | 5. 20892334  | 1  |
| MSTRG. 17826. 6 | 213  | 0. 45623 | 5. 20892334  | 1  |
| MSTRG. 17826. 9 | 213  | 0. 44899 | 5. 20892334  | 1  |
| MSTRG. 17828. 6 | 233  | 0. 30813 | 6. 075866699 | 1  |
| MSTRG. 17828. 7 | 233  | 0. 30899 | 6. 075866699 | 1  |
| MSTRG. 17828. 3 | 233  | 0. 35749 | 6. 075866699 | 1  |
| MSTRG. 17829. 1 | 129  | 0. 35369 | 9. 050354004 | 1  |
| MSTRG. 17830. 4 | 221  | 0. 29889 | 5. 995300293 | 1  |
| MSTRG. 17830. 5 | 220  | 0. 29889 | 5. 995300293 | 1  |
| MSTRG. 17830. 6 | 215  | 0. 29328 | 5. 78717041  | 1  |
| MSTRG. 17832. 2 | 424  | 0. 38538 | 8. 567199707 | 1  |
| MSTRG. 17833. 1 | 17   | 0. 38425 | 12. 30426025 | -1 |
| MSTRG. 17835. 2 | 260  | 0. 41206 | 8. 377258301 | 1  |

|                 |      |          |              |    |
|-----------------|------|----------|--------------|----|
| MSTRG. 17836. 2 | 513  | 0. 43398 | 5. 403259277 | 1  |
| MSTRG. 17836. 3 | 513  | 0. 42126 | 5. 403259277 | 1  |
| MSTRG. 17837. 3 | 201  | 0. 39886 | 6. 72857666  | 1  |
| MSTRG. 17837. 4 | 132  | 0. 35581 | 6. 817932129 | 1  |
| MSTRG. 17839. 4 | 1110 | 0. 45163 | 8. 229675293 | 1  |
| MSTRG. 17819. 1 | 54   | 0. 33744 | 8. 988342285 | -1 |
| MSTRG. 17821. 2 | 458  | 0. 46981 | 5. 870056152 | 1  |
| MSTRG. 17841. 2 | 333  | 0. 46777 | 6. 80657959  | 1  |
| MSTRG. 17841. 3 | 333  | 0. 42098 | 6. 80657959  | 1  |
| MSTRG. 17841. 4 | 341  | 0. 44201 | 6. 569152832 | 1  |
| MSTRG. 17841. 5 | 333  | 0. 46777 | 6. 80657959  | 1  |
| MSTRG. 17841. 6 | 341  | 0. 45201 | 6. 569152832 | 1  |
| MSTRG. 17842. 1 | 193  | 0. 35659 | 9. 178039551 | 1  |
| MSTRG. 17842. 4 | 332  | 0. 40665 | 7. 082092285 | 1  |
| MSTRG. 17840. 1 | 463  | 0. 44063 | 9. 109802246 | 1  |
| MSTRG. 17840. 2 | 463  | 0. 44063 | 9. 109802246 | 1  |
| MSTRG. 17845. 4 | 417  | 0. 35687 | 5. 099304199 | 1  |
| MSTRG. 17847. 1 | 228  | 0. 3469  | 4. 862731934 | 1  |
| MSTRG. 17847. 3 | 228  | 0. 46787 | 4. 862731934 | 1  |
| MSTRG. 17849. 1 | 103  | 0. 36537 | 7. 80291748  | 1  |
| MSTRG. 17848. 5 | 2196 | 0. 44059 | 8. 147766113 | 1  |
| MSTRG. 17856. 1 | 142  | 0. 36907 | 9. 213439941 | 1  |
| MSTRG. 17863. 4 | 262  | 0. 37597 | 9. 426818848 | 1  |
| MSTRG. 17863. 2 | 407  | 0. 4485  | 4. 795349121 | 1  |
| MSTRG. 17863. 3 | 410  | 0. 4632  | 4. 909606934 | 1  |
| MSTRG. 17863. 5 | 259  | 0. 40692 | 9. 316711426 | 1  |
| MSTRG. 17873. 4 | 310  | 0. 31975 | 9. 787658691 | 1  |
| MSTRG. 17873. 3 | 305  | 0. 29887 | 9. 821105957 | 1  |
| MSTRG. 17878. 1 | 976  | 0. 47685 | 9. 995422363 | 1  |
| MSTRG. 17878. 2 | 962  | 0. 47685 | 9. 722229004 | 1  |
| MSTRG. 17878. 4 | 1016 | 0. 44946 | 10. 012146   | 1  |
| MSTRG. 17878. 5 | 629  | 0. 47669 | 9. 858825684 | 1  |
| MSTRG. 17878. 6 | 131  | 0. 27515 | 8. 403015137 | 1  |
| MSTRG. 17879. 2 | 97   | 0. 345   | 6. 267028809 | 1  |
| MSTRG. 17878. 7 | 108  | 0. 30193 | 8. 835876465 | 1  |
| MSTRG. 17865. 1 | 68   | 0. 43505 | 10. 21820068 | 1  |
| MSTRG. 17866. 1 | 92   | 0. 33423 | 10. 05499268 | 1  |
| MSTRG. 17867. 1 | 84   | 0. 35801 | 9. 989196777 | 1  |
| MSTRG. 17891. 1 | 299  | 0. 3586  | 8. 491516113 | 1  |
| MSTRG. 17892. 2 | 1323 | 0. 42174 | 8. 832458496 | 1  |
| MSTRG. 17892. 3 | 685  | 0. 44535 | 7. 75994873  | 1  |
| MSTRG. 17892. 4 | 846  | 0. 39885 | 9. 079772949 | 1  |
| MSTRG. 17892. 5 | 1330 | 0. 43405 | 8. 723327637 | 1  |
| MSTRG. 17892. 7 | 191  | 0. 38455 | 4. 759094238 | 1  |
| MSTRG. 17903. 1 | 25   | 0. 44011 | 7. 957824707 | 1  |
| MSTRG. 17904. 6 | 394  | 0. 4595  | 5. 496765137 | 1  |
| MSTRG. 17904. 5 | 394  | 0. 35755 | 5. 496765137 | 1  |
| MSTRG. 17904. 7 | 270  | 0. 40985 | 9. 212341309 | 1  |
| MSTRG. 17908. 1 | 194  | 0. 36467 | 8. 319641113 | 1  |
| MSTRG. 17906. 1 | 18   | 0. 39225 | 6. 684265137 | 1  |
| MSTRG. 17907. 2 | 180  | 0. 41886 | 6. 958312988 | 1  |
| MSTRG. 17912. 2 | 64   | 0. 34804 | 10. 92218018 | 1  |
| MSTRG. 17913. 1 | 73   | 0. 34557 | 9. 852844238 | -1 |
| MSTRG. 17921. 1 | 368  | 0. 37768 | 7. 960632324 | 1  |

|                  |      |          |              |   |
|------------------|------|----------|--------------|---|
| MSTRG. 17921. 5  | 368  | 0. 38254 | 7. 960632324 | 1 |
| MSTRG. 17923. 1  | 315  | 0. 46239 | 7. 662658691 | 1 |
| MSTRG. 17924. 1  | 357  | 0. 46804 | 9. 360412598 | 1 |
| MSTRG. 17923. 2  | 61   | 0. 33197 | 5. 852233887 | 1 |
| MSTRG. 17923. 3  | 315  | 0. 44007 | 7. 662658691 | 1 |
| MSTRG. 17923. 4  | 338  | 0. 37989 | 6. 968444824 | 1 |
| MSTRG. 17923. 5  | 105  | 0. 38554 | 6. 621520996 | 1 |
| MSTRG. 17918. 1  | 92   | 0. 37792 | 6. 632263184 | 1 |
| MSTRG. 17929. 1  | 35   | 0. 29202 | 5. 74822998  | 1 |
| MSTRG. 17919. 1  | 32   | 0. 44044 | 8. 537902832 | 1 |
| MSTRG. 17931. 1  | 299  | 0. 41071 | 8. 983947754 | 1 |
| MSTRG. 17931. 3  | 20   | 0. 4111  | 6. 507629395 | 1 |
| MSTRG. 17931. 4  | 123  | 0. 40601 | 8. 850402832 | 1 |
| MSTRG. 17941. 1  | 527  | 0. 37473 | 5. 917297363 | 1 |
| MSTRG. 17942. 3  | 553  | 0. 4039  | 5. 132141113 | 1 |
| MSTRG. 17943. 4  | 151  | 0. 32974 | 6. 03314209  | 1 |
| MSTRG. 17943. 2  | 277  | 0. 45317 | 5. 51361084  | 1 |
| MSTRG. 17943. 3  | 270  | 0. 43509 | 5. 402526855 | 1 |
| MSTRG. 17954. 3  | 391  | 0. 36188 | 7. 292053223 | 1 |
| MSTRG. 17952. 2  | 351  | 0. 42063 | 6. 012023926 | 1 |
| MSTRG. 17958. 1  | 361  | 0. 37657 | 8. 915466309 | 1 |
| MSTRG. 17963. 2  | 43   | 0. 41692 | 9. 467468262 | 1 |
| MSTRG. 17963. 1  | 53   | 0. 3737  | 11. 57025146 | 1 |
| MSTRG. 17972. 5  | 747  | 0. 44567 | 9. 245910645 | 1 |
| MSTRG. 17972. 7  | 747  | 0. 43883 | 9. 245910645 | 1 |
| MSTRG. 17972. 6  | 740  | 0. 36517 | 9. 272766113 | 1 |
| MSTRG. 17972. 10 | 747  | 0. 44567 | 9. 245910645 | 1 |
| MSTRG. 17972. 8  | 740  | 0. 43883 | 9. 272766113 | 1 |
| MSTRG. 17972. 9  | 747  | 0. 44567 | 9. 245910645 | 1 |
| MSTRG. 17972. 11 | 740  | 0. 48163 | 9. 272766113 | 1 |
| MSTRG. 17973. 1  | 65   | 0. 32018 | 7. 815124512 | 1 |
| MSTRG. 17975. 1  | 429  | 0. 4467  | 8. 485900879 | 1 |
| MSTRG. 17978. 2  | 503  | 0. 45639 | 6. 821350098 | 1 |
| MSTRG. 17980. 2  | 549  | 0. 43277 | 6. 288513184 | 1 |
| MSTRG. 17980. 3  | 639  | 0. 37055 | 6. 216247559 | 1 |
| MSTRG. 17981. 1  | 83   | 0. 32709 | 5. 347717285 | 1 |
| MSTRG. 17982. 2  | 496  | 0. 40562 | 8. 946594238 | 1 |
| MSTRG. 17984. 8  | 685  | 0. 41605 | 9. 214782715 | 1 |
| MSTRG. 17984. 7  | 404  | 0. 34844 | 9. 699279785 | 1 |
| MSTRG. 17984. 10 | 743  | 0. 42466 | 8. 063415527 | 1 |
| MSTRG. 17985. 1  | 102  | 0. 28536 | 12. 00152588 | 1 |
| MSTRG. 17986. 2  | 1535 | 0. 42109 | 6. 214050293 | 1 |
| MSTRG. 17987. 3  | 412  | 0. 33817 | 5. 045837402 | 1 |
| MSTRG. 17987. 4  | 412  | 0. 33316 | 5. 045837402 | 1 |
| MSTRG. 17987. 5  | 544  | 0. 33777 | 5. 082458496 | 1 |
| MSTRG. 17988. 1  | 13   | 0. 30739 | 4. 084533691 | 1 |
| MSTRG. 17989. 1  | 91   | 0. 33713 | 6. 968933105 | 1 |
| MSTRG. 17999. 2  | 1258 | 0. 38358 | 8. 972961426 | 1 |
| MSTRG. 17999. 3  | 1059 | 0. 35595 | 8. 899841309 | 1 |
| MSTRG. 17999. 5  | 268  | 0. 31672 | 5. 195617676 | 1 |
| MSTRG. 17995. 1  | 100  | 0. 43156 | 8. 492370605 | 1 |
| MSTRG. 17996. 1  | 202  | 0. 37942 | 10. 42877197 | 1 |
| MSTRG. 17998. 1  | 71   | 0. 29235 | 4. 433654785 | 1 |
| MSTRG. 18002. 1  | 169  | 0. 43689 | 6. 08013916  | 1 |

|                  |      |          |              |   |
|------------------|------|----------|--------------|---|
| MSTRG. 18015. 1  | 149  | 0. 36409 | 8. 567810059 | 1 |
| MSTRG. 18019. 1  | 72   | 0. 40178 | 8. 837585449 | 1 |
| MSTRG. 18024. 4  | 184  | 0. 32108 | 10. 71331787 | 1 |
| MSTRG. 18024. 9  | 299  | 0. 38657 | 8. 934997559 | 1 |
| MSTRG. 18024. 11 | 283  | 0. 47513 | 9. 474304199 | 1 |
| MSTRG. 18024. 12 | 184  | 0. 32089 | 10. 71331787 | 1 |
| MSTRG. 18024. 13 | 181  | 0. 34514 | 10. 82928467 | 1 |
| MSTRG. 18025. 1  | 189  | 0. 30104 | 9. 955749512 | 1 |
| MSTRG. 18026. 2  | 328  | 0. 44008 | 5. 857971191 | 1 |
| MSTRG. 18023. 2  | 334  | 0. 41042 | 5. 639831543 | 1 |
| MSTRG. 18031. 3  | 862  | 0. 35984 | 6. 00201416  | 1 |
| MSTRG. 18031. 4  | 862  | 0. 39432 | 6. 00201416  | 1 |
| MSTRG. 18032. 1  | 120  | 0. 28066 | 5. 045593262 | 1 |
| MSTRG. 18033. 1  | 125  | 0. 31653 | 6. 812072754 | 1 |
| MSTRG. 18037. 2  | 64   | 0. 40014 | 5. 045715332 | 1 |
| MSTRG. 18038. 3  | 433  | 0. 43202 | 6. 391540527 | 1 |
| MSTRG. 18038. 2  | 205  | 0. 44278 | 6. 484436035 | 1 |
| MSTRG. 18040. 7  | 135  | 0. 35371 | 6. 187683105 | 1 |
| MSTRG. 18040. 10 | 1049 | 0. 49596 | 9. 483459473 | 1 |
| MSTRG. 18040. 9  | 2037 | 0. 50103 | 9. 269592285 | 1 |
| MSTRG. 18040. 12 | 1948 | 0. 50544 | 9. 208312988 | 1 |
| MSTRG. 18040. 13 | 1049 | 0. 47692 | 9. 483459473 | 1 |
| MSTRG. 18040. 4  | 2048 | 0. 50544 | 9. 329772949 | 1 |
| MSTRG. 18040. 8  | 1061 | 0. 4874  | 9. 585510254 | 1 |
| MSTRG. 18046. 1  | 49   | 0. 39795 | 6. 088928223 | 1 |
| MSTRG. 18050. 1  | 276  | 0. 36399 | 9. 117858887 | 1 |
| MSTRG. 18051. 1  | 20   | 0. 37525 | 10. 03692627 | 1 |
| MSTRG. 18054. 3  | 279  | 0. 44144 | 7. 575256348 | 1 |
| MSTRG. 18052. 1  | 288  | 0. 33938 | 8. 066101074 | 1 |
| MSTRG. 18063. 1  | 612  | 0. 40419 | 8. 18548584  | 1 |
| MSTRG. 18063. 2  | 537  | 0. 39586 | 5. 356872559 | 1 |
| MSTRG. 18063. 3  | 612  | 0. 42674 | 8. 18548584  | 1 |
| MSTRG. 18063. 5  | 953  | 0. 44279 | 8. 741638184 | 1 |
| MSTRG. 18064. 2  | 145  | 0. 35843 | 5. 953552246 | 1 |
| MSTRG. 18066. 7  | 367  | 0. 39182 | 6. 120544434 | 1 |
| MSTRG. 18066. 5  | 367  | 0. 43185 | 6. 120544434 | 1 |
| MSTRG. 18066. 6  | 367  | 0. 43185 | 6. 120544434 | 1 |
| MSTRG. 18060. 1  | 690  | 0. 46006 | 8. 433654785 | 1 |
| MSTRG. 18068. 1  | 104  | 0. 32404 | 6. 162902832 | 1 |
| MSTRG. 18068. 3  | 104  | 0. 32404 | 6. 162902832 | 1 |
| MSTRG. 18068. 4  | 104  | 0. 34714 | 6. 162902832 | 1 |
| MSTRG. 18069. 1  | 731  | 0. 37592 | 6. 209655762 | 1 |
| MSTRG. 18069. 2  | 177  | 0. 2971  | 8. 97454834  | 1 |
| MSTRG. 18070. 1  | 94   | 0. 37147 | 9. 598083496 | 1 |
| MSTRG. 18069. 4  | 731  | 0. 37592 | 6. 209655762 | 1 |
| MSTRG. 18069. 5  | 990  | 0. 38137 | 8. 891418457 | 1 |
| MSTRG. 18073. 1  | 129  | 0. 35686 | 9. 909118652 | 1 |
| MSTRG. 18072. 2  | 285  | 0. 42471 | 5. 678771973 | 1 |
| MSTRG. 18072. 4  | 285  | 0. 4011  | 5. 678771973 | 1 |
| MSTRG. 18072. 8  | 285  | 0. 31585 | 5. 678771973 | 1 |
| MSTRG. 18074. 2  | 184  | 0. 46485 | 4. 954528809 | 1 |
| MSTRG. 18093. 6  | 375  | 0. 3823  | 5. 126159668 | 1 |
| MSTRG. 18093. 2  | 346  | 0. 39342 | 5. 316955566 | 1 |
| MSTRG. 18093. 4  | 335  | 0. 40798 | 5. 50982666  | 1 |

|                 |      |          |              |    |
|-----------------|------|----------|--------------|----|
| MSTRG. 18093. 8 | 66   | 0. 34547 | 11. 39801025 | 1  |
| MSTRG. 18095. 4 | 144  | 0. 29776 | 5. 917907715 | 1  |
| MSTRG. 18098. 1 | 75   | 0. 28875 | 7. 744445801 | 1  |
| MSTRG. 18099. 2 | 608  | 0. 33974 | 6. 48248291  | 1  |
| MSTRG. 18101. 1 | 184  | 0. 29202 | 10. 206604   | 1  |
| MSTRG. 18101. 2 | 106  | 0. 29607 | 11. 49334717 | 1  |
| MSTRG. 18102. 3 | 75   | 0. 27097 | 4. 96673584  | 1  |
| MSTRG. 18103. 1 | 89   | 0. 31437 | 9. 250305176 | 1  |
| MSTRG. 18105. 1 | 56   | 0. 33627 | 9. 872619629 | 1  |
| MSTRG. 18106. 1 | 30   | 0. 43233 | 9. 692443848 | 1  |
| MSTRG. 18083. 2 | 156  | 0. 33226 | 5. 91217041  | 1  |
| MSTRG. 18083. 3 | 171  | 0. 26913 | 9. 415222168 | 1  |
| MSTRG. 18085. 2 | 19   | 0. 32743 | 4. 780578613 | -1 |
| MSTRG. 18089. 1 | 125  | 0. 30796 | 9. 245300293 | 1  |
| MSTRG. 18091. 3 | 105  | 0. 33463 | 8. 44720459  | 1  |
| MSTRG. 18089. 2 | 125  | 0. 31204 | 9. 245300293 | 1  |
| MSTRG. 18122. 1 | 62   | 0. 33698 | 8. 045593262 | 1  |
| MSTRG. 18129. 1 | 1290 | 0. 46213 | 5. 69720459  | 1  |
| MSTRG. 18130. 3 | 944  | 0. 37956 | 5. 773132324 | 1  |
| MSTRG. 18130. 4 | 944  | 0. 37956 | 5. 773132324 | 1  |
| MSTRG. 18131. 5 | 1805 | 0. 40182 | 5. 407653809 | 1  |
| MSTRG. 18131. 4 | 2721 | 0. 49286 | 5. 871276855 | 1  |
| MSTRG. 18131. 3 | 2721 | 0. 47107 | 5. 871276855 | 1  |
| MSTRG. 18131. 6 | 1705 | 0. 45773 | 5. 668029785 | 1  |
| MSTRG. 18132. 1 | 67   | 0. 36486 | 9. 891906738 | -1 |
| MSTRG. 18135. 1 | 975  | 0. 36007 | 6. 084777832 | 1  |
| MSTRG. 18137. 1 | 71   | 0. 36665 | 10. 94671631 | 1  |
| MSTRG. 18137. 2 | 84   | 0. 42853 | 10. 5178833  | 1  |
| MSTRG. 18138. 2 | 41   | 0. 28486 | 7. 99810791  | 1  |
| MSTRG. 18138. 1 | 57   | 0. 32073 | 6. 810852051 | 1  |
| MSTRG. 18148. 9 | 116  | 0. 28567 | 9. 860046387 | 1  |
| MSTRG. 18149. 1 | 64   | 0. 42378 | 10. 300354   | 1  |
| MSTRG. 18151. 1 | 73   | 0. 32005 | 11. 20013428 | 1  |
| MSTRG. 18152. 2 | 216  | 0. 42047 | 12. 08892822 | 1  |
| MSTRG. 18152. 3 | 345  | 0. 41999 | 11. 47332764 | 1  |
| MSTRG. 18152. 4 | 157  | 0. 43856 | 11. 94317627 | 1  |
| MSTRG. 18153. 1 | 427  | 0. 30721 | 4. 866271973 | 1  |
| MSTRG. 18153. 2 | 422  | 0. 33031 | 8. 102111816 | 1  |
| MSTRG. 18142. 3 | 461  | 0. 46253 | 5. 399597168 | 1  |
| MSTRG. 18147. 2 | 533  | 0. 45511 | 5. 683532715 | 1  |
| MSTRG. 18140. 1 | 43   | 0. 4472  | 9. 690856934 | 1  |
| MSTRG. 18140. 2 | 43   | 0. 40971 | 9. 690856934 | 1  |
| MSTRG. 18155. 1 | 394  | 0. 28338 | 9. 419006348 | 1  |
| MSTRG. 18155. 2 | 197  | 0. 31588 | 6. 057556152 | 1  |
| MSTRG. 18156. 1 | 161  | 0. 2886  | 8. 112487793 | 1  |
| MSTRG. 18157. 1 | 193  | 0. 27651 | 9. 324890137 | 1  |
| MSTRG. 18158. 3 | 291  | 0. 40868 | 8. 063171387 | 1  |
| MSTRG. 18159. 1 | 76   | 0. 28195 | 5. 763244629 | 1  |
| MSTRG. 18161. 4 | 237  | 0. 44087 | 8. 738708496 | 1  |
| MSTRG. 18162. 2 | 465  | 0. 40383 | 6. 64263916  | 1  |
| MSTRG. 18164. 1 | 472  | 0. 39318 | 7. 455871582 | 1  |
| MSTRG. 18169. 1 | 266  | 0. 46138 | 9. 647033691 | 1  |
| MSTRG. 18170. 3 | 190  | 0. 37825 | 8. 578186035 | 1  |
| MSTRG. 18174. 1 | 124  | 0. 45869 | 9. 503234863 | 1  |

|                  |      |          |              |    |
|------------------|------|----------|--------------|----|
| MSTRG. 18174. 5  | 133  | 0. 44162 | 9. 382385254 | 1  |
| MSTRG. 18173. 1  | 154  | 0. 46058 | 10. 24578857 | 1  |
| MSTRG. 18173. 2  | 160  | 0. 45853 | 10. 18609619 | 1  |
| MSTRG. 18176. 2  | 79   | 0. 43732 | 9. 253723145 | 1  |
| MSTRG. 18177. 2  | 126  | 0. 32935 | 8. 851379395 | 1  |
| MSTRG. 18183. 4  | 231  | 0. 45133 | 9. 180603027 | 1  |
| MSTRG. 18191. 1  | 40   | 0. 40869 | 11. 54058838 | -1 |
| MSTRG. 18191. 2  | 42   | 0. 37493 | 9. 489562988 | -1 |
| MSTRG. 18191. 3  | 42   | 0. 37493 | 9. 489562988 | -1 |
| MSTRG. 18191. 4  | 40   | 0. 42069 | 11. 54058838 | -1 |
| MSTRG. 18185. 1  | 83   | 0. 36375 | 9. 075256348 | 1  |
| MSTRG. 18196. 2  | 176  | 0. 34594 | 9. 191955566 | 1  |
| MSTRG. 18196. 3  | 100  | 0. 42497 | 10. 08172607 | 1  |
| MSTRG. 18196. 4  | 79   | 0. 45621 | 9. 605041504 | 1  |
| MSTRG. 18198. 1  | 78   | 0. 44141 | 8. 980041504 | 1  |
| MSTRG. 18200. 2  | 144  | 0. 3974  | 4. 77142334  | 1  |
| MSTRG. 18200. 3  | 144  | 0. 37825 | 4. 77142334  | 1  |
| MSTRG. 18200. 4  | 144  | 0. 37395 | 4. 77142334  | 1  |
| MSTRG. 18200. 5  | 91   | 0. 34575 | 7. 882629395 | 1  |
| MSTRG. 18201. 2  | 290  | 0. 45689 | 9. 455993652 | 1  |
| MSTRG. 18219. 2  | 1129 | 0. 32868 | 6. 640441895 | 1  |
| MSTRG. 18219. 1  | 1128 | 0. 32113 | 6. 640441895 | 1  |
| MSTRG. 18219. 3  | 1128 | 0. 39197 | 6. 640441895 | 1  |
| MSTRG. 18219. 4  | 1135 | 0. 39197 | 6. 640441895 | 1  |
| MSTRG. 18219. 5  | 1129 | 0. 38577 | 6. 640441895 | 1  |
| MSTRG. 18219. 6  | 1129 | 0. 39197 | 6. 640441895 | 1  |
| MSTRG. 18219. 8  | 824  | 0. 38292 | 7. 31829834  | 1  |
| MSTRG. 18210. 1  | 226  | 0. 36982 | 8. 435974121 | 1  |
| MSTRG. 18211. 4  | 584  | 0. 3868  | 9. 592468262 | 1  |
| MSTRG. 18212. 2  | 174  | 0. 32883 | 6. 137634277 | 1  |
| MSTRG. 18214. 1  | 120  | 0. 47125 | 10. 45599365 | 1  |
| MSTRG. 18214. 2  | 120  | 0. 42641 | 10. 45599365 | 1  |
| MSTRG. 18215. 1  | 81   | 0. 28948 | 6. 885437012 | 1  |
| MSTRG. 18220. 2  | 537  | 0. 4132  | 5. 895935059 | 1  |
| MSTRG. 18226. 2  | 141  | 0. 42671 | 5. 412780762 | 1  |
| MSTRG. 18229. 2  | 1173 | 0. 41141 | 6. 63470459  | 1  |
| MSTRG. 18229. 1  | 1148 | 0. 41141 | 6. 710876465 | 1  |
| MSTRG. 18229. 5  | 1168 | 0. 43726 | 6. 351379395 | 1  |
| MSTRG. 18234. 1  | 33   | 0. 32522 | 11. 3336792  | 1  |
| MSTRG. 18240. 1  | 1410 | 0. 36082 | 7. 142272949 | 1  |
| MSTRG. 18240. 8  | 1411 | 0. 44537 | 7. 142272949 | 1  |
| MSTRG. 18240. 7  | 1410 | 0. 39687 | 7. 142272949 | 1  |
| MSTRG. 18240. 9  | 1410 | 0. 36001 | 7. 142272949 | 1  |
| MSTRG. 18240. 10 | 1410 | 0. 36001 | 7. 142272949 | 1  |
| MSTRG. 18240. 11 | 1411 | 0. 41073 | 7. 142272949 | 1  |
| MSTRG. 18241. 1  | 174  | 0. 30596 | 9. 175354004 | 1  |
| MSTRG. 18240. 12 | 1410 | 0. 37291 | 7. 142272949 | 1  |
| MSTRG. 18242. 2  | 865  | 0. 46099 | 9. 324279785 | 1  |
| MSTRG. 18242. 4  | 656  | 0. 45994 | 9. 27557373  | 1  |
| MSTRG. 18245. 1  | 89   | 0. 30846 | 9. 494812012 | 1  |
| MSTRG. 18245. 2  | 53   | 0. 37568 | 10. 04425049 | 1  |
| MSTRG. 18238. 2  | 1591 | 0. 46343 | 5. 86505127  | 1  |
| MSTRG. 18239. 1  | 133  | 0. 28311 | 9. 504577637 | 1  |
| MSTRG. 18246. 2  | 550  | 0. 37465 | 5. 434265137 | 1  |



|                  |      |          |              |    |
|------------------|------|----------|--------------|----|
| MSTRG. 18246. 3  | 620  | 0. 43135 | 5. 898620605 | 1  |
| MSTRG. 18252. 2  | 781  | 0. 4421  | 9. 26348877  | -1 |
| MSTRG. 18253. 2  | 1918 | 0. 43687 | 7. 902770996 | 1  |
| MSTRG. 18251. 1  | 96   | 0. 369   | 9. 841125488 | 1  |
| MSTRG. 18259. 2  | 426  | 0. 3644  | 8. 507141113 | 1  |
| MSTRG. 18261. 1  | 119  | 0. 34732 | 10. 98016357 | -1 |
| MSTRG. 18269. 10 | 142  | 0. 27732 | 9. 739929199 | 1  |
| MSTRG. 18269. 8  | 74   | 0. 33248 | 10. 90313721 | 1  |
| MSTRG. 18269. 6  | 63   | 0. 32912 | 11. 70526123 | 1  |
| MSTRG. 18269. 13 | 108  | 0. 28007 | 5. 355651855 | 1  |
| MSTRG. 18269. 3  | 108  | 0. 27651 | 5. 355651855 | 1  |
| MSTRG. 18269. 7  | 105  | 0. 35341 | 9. 742248535 | 1  |
| MSTRG. 18269. 11 | 58   | 0. 30808 | 9. 42791748  | 1  |
| MSTRG. 18269. 12 | 105  | 0. 30197 | 9. 742248535 | 1  |
| MSTRG. 18269. 1  | 271  | 0. 37995 | 6. 333068848 | 1  |
| MSTRG. 18269. 14 | 271  | 0. 37311 | 6. 333068848 | 1  |
| MSTRG. 18269. 2  | 271  | 0. 30032 | 6. 333068848 | 1  |
| MSTRG. 18269. 4  | 271  | 0. 37995 | 6. 333068848 | 1  |
| MSTRG. 18269. 5  | 271  | 0. 37311 | 6. 333068848 | 1  |
| MSTRG. 18269. 9  | 271  | 0. 39793 | 6. 333068848 | 1  |
| MSTRG. 18275. 1  | 165  | 0. 28883 | 10. 14678955 | 1  |
| MSTRG. 18276. 4  | 75   | 0. 27274 | 8. 683898926 | 1  |
| MSTRG. 18276. 3  | 75   | 0. 27274 | 8. 683898926 | 1  |
| MSTRG. 18277. 1  | 947  | 0. 46925 | 8. 421813965 | 1  |
| MSTRG. 18277. 4  | 509  | 0. 43816 | 9. 487487793 | 1  |
| MSTRG. 18278. 1  | 123  | 0. 41758 | 5. 846984863 | 1  |
| MSTRG. 18270. 2  | 140  | 0. 39029 | 4. 069763184 | 1  |
| MSTRG. 18274. 1  | 112  | 0. 39665 | 9. 503234863 | 1  |
| MSTRG. 18274. 2  | 241  | 0. 33809 | 10. 76031494 | 1  |
| MSTRG. 18274. 3  | 128  | 0. 30193 | 9. 385437012 | 1  |
| MSTRG. 18274. 4  | 161  | 0. 38754 | 9. 506530762 | 1  |
| MSTRG. 18273. 2  | 129  | 0. 35814 | 5. 582458496 | 1  |
| MSTRG. 18292. 2  | 951  | 0. 45392 | 6. 653259277 | 1  |
| MSTRG. 18292. 3  | 994  | 0. 4564  | 7. 167175293 | 1  |
| MSTRG. 18294. 2  | 109  | 0. 40043 | 9. 338684082 | 1  |
| MSTRG. 18294. 5  | 392  | 0. 4041  | 8. 851989746 | -1 |
| MSTRG. 18329. 1  | 58   | 0. 31637 | 4. 655822754 | 1  |
| MSTRG. 18346. 1  | 116  | 0. 3143  | 9. 831115723 | 1  |
| MSTRG. 18346. 2  | 105  | 0. 37122 | 10. 27252197 | 1  |
| MSTRG. 18346. 3  | 105  | 0. 34819 | 10. 27252197 | 1  |
| MSTRG. 18347. 1  | 114  | 0. 27911 | 10. 07537842 | 1  |
| MSTRG. 18348. 1  | 996  | 0. 38051 | 8. 026184082 | 1  |
| MSTRG. 18348. 2  | 122  | 0. 27587 | 8. 777160645 | 1  |
| MSTRG. 18349. 1  | 186  | 0. 28419 | 6. 499328613 | 1  |
| MSTRG. 18350. 1  | 222  | 0. 28419 | 4. 843078613 | 1  |
| MSTRG. 18350. 2  | 267  | 0. 28419 | 4. 775695801 | 1  |
| MSTRG. 18350. 3  | 267  | 0. 30661 | 4. 714050293 | 1  |
| MSTRG. 18351. 1  | 138  | 0. 28267 | 10. 23956299 | 1  |
| MSTRG. 18348. 3  | 874  | 0. 36206 | 9. 001281738 | 1  |
| MSTRG. 18352. 1  | 144  | 0. 28267 | 8. 35760498  | 1  |
| MSTRG. 18353. 1  | 73   | 0. 31768 | 9. 565979004 | 1  |
| MSTRG. 18354. 1  | 143  | 0. 27587 | 8. 92010498  | 1  |
| MSTRG. 18355. 1  | 80   | 0. 418   | 8. 803527832 | -1 |
| MSTRG. 18297. 2  | 896  | 0. 3692  | 8. 757385254 | 1  |

|                 |      |          |              |    |
|-----------------|------|----------|--------------|----|
| MSTRG. 18297. 3 | 991  | 0. 41425 | 8. 832214355 | 1  |
| MSTRG. 18297. 6 | 752  | 0. 45613 | 8. 124084473 | -1 |
| MSTRG. 18297. 5 | 752  | 0. 43768 | 8. 124084473 | -1 |
| MSTRG. 18299. 2 | 82   | 0. 32037 | 10. 03497314 | 1  |
| MSTRG. 18299. 3 | 125  | 0. 30221 | 9. 852966309 | 1  |
| MSTRG. 18304. 1 | 62   | 0. 3884  | 10. 60577393 | 1  |
| MSTRG. 18306. 2 | 77   | 0. 41634 | 4. 110900879 | 1  |
| MSTRG. 18306. 3 | 73   | 0. 42228 | 4. 270812988 | -1 |
| MSTRG. 18307. 1 | 46   | 0. 39925 | 9. 149719238 | 1  |
| MSTRG. 18321. 1 | 82   | 0. 33913 | 10. 77105713 | 1  |
| MSTRG. 18369. 2 | 257  | 0. 36921 | 11. 03509521 | 1  |
| MSTRG. 18369. 5 | 257  | 0. 43366 | 11. 03509521 | 1  |
| MSTRG. 18369. 4 | 257  | 0. 42022 | 11. 03509521 | 1  |
| MSTRG. 18369. 3 | 257  | 0. 4094  | 11. 03509521 | 1  |
| MSTRG. 18371. 2 | 111  | 0. 37144 | 8. 745666504 | 1  |
| MSTRG. 18373. 1 | 127  | 0. 37539 | 11. 32806396 | 1  |
| MSTRG. 18378. 2 | 493  | 0. 43246 | 6. 320983887 | 1  |
| MSTRG. 18379. 6 | 515  | 0. 3848  | 5. 534973145 | 1  |
| MSTRG. 18381. 3 | 616  | 0. 29162 | 9. 531677246 | 1  |
| MSTRG. 18381. 4 | 462  | 0. 42722 | 9. 609924316 | 1  |
| MSTRG. 18382. 3 | 274  | 0. 33122 | 7. 030090332 | 1  |
| MSTRG. 18382. 4 | 82   | 0. 38966 | 6. 243103027 | 1  |
| MSTRG. 18383. 3 | 448  | 0. 43599 | 8. 303771973 | 1  |
| MSTRG. 18383. 1 | 446  | 0. 40843 | 6. 968200684 | 1  |
| MSTRG. 18386. 1 | 192  | 0. 4179  | 9. 277648926 | 1  |
| MSTRG. 18386. 2 | 148  | 0. 42157 | 8. 61932373  | 1  |
| MSTRG. 18398. 5 | 545  | 0. 43779 | 5. 316345215 | 1  |
| MSTRG. 18400. 4 | 356  | 0. 42447 | 6. 732849121 | 1  |
| MSTRG. 18400. 3 | 1639 | 0. 43361 | 6. 308776855 | 1  |
| MSTRG. 18400. 5 | 1630 | 0. 43926 | 6. 308288574 | 1  |
| MSTRG. 18400. 7 | 1610 | 0. 43493 | 6. 307800293 | 1  |
| MSTRG. 18400. 6 | 1639 | 0. 44516 | 6. 308776855 | 1  |
| MSTRG. 18400. 9 | 1351 | 0. 44351 | 6. 148986816 | -1 |
| MSTRG. 18401. 1 | 143  | 0. 30672 | 6. 584533691 | 1  |
| MSTRG. 18405. 1 | 171  | 0. 28622 | 11. 53839111 | 1  |
| MSTRG. 18406. 1 | 1645 | 0. 43405 | 6. 855895996 | 1  |
| MSTRG. 18408. 1 | 242  | 0. 3331  | 6. 940246582 | 1  |
| MSTRG. 18408. 3 | 242  | 0. 41342 | 6. 940246582 | 1  |
| MSTRG. 18408. 4 | 242  | 0. 40568 | 6. 940246582 | 1  |
| MSTRG. 18413. 2 | 683  | 0. 40643 | 5. 97467041  | 1  |
| MSTRG. 18413. 3 | 616  | 0. 32864 | 6. 184509277 | 1  |
| MSTRG. 18414. 1 | 515  | 0. 39709 | 9. 379211426 | 1  |
| MSTRG. 18416. 4 | 606  | 0. 43179 | 7. 879821777 | 1  |
| MSTRG. 18416. 5 | 309  | 0. 44711 | 9. 015686035 | 1  |
| MSTRG. 18416. 6 | 365  | 0. 45689 | 9. 094055176 | 1  |
| MSTRG. 18417. 1 | 390  | 0. 41696 | 4. 929260254 | 1  |
| MSTRG. 18417. 3 | 313  | 0. 39839 | 10. 28155518 | 1  |
| MSTRG. 18433. 6 | 516  | 0. 43868 | 5. 176330566 | 1  |
| MSTRG. 18433. 7 | 516  | 0. 43738 | 5. 176330566 | 1  |
| MSTRG. 18434. 3 | 1541 | 0. 40804 | 4. 988464355 | 1  |
| MSTRG. 18435. 1 | 570  | 0. 41792 | 5. 837585449 | 1  |
| MSTRG. 18435. 2 | 347  | 0. 41277 | 9. 159606934 | 1  |
| MSTRG. 18438. 1 | 140  | 0. 29536 | 11. 31536865 | 1  |
| MSTRG. 18438. 2 | 140  | 0. 41231 | 11. 31536865 | 1  |

|                  |      |          |              |    |
|------------------|------|----------|--------------|----|
| MSTRG. 18447. 3  | 637  | 0. 36627 | 6. 296081543 | 1  |
| MSTRG. 18448. 1  | 76   | 0. 33996 | 8. 967468262 | -1 |
| MSTRG. 18448. 2  | 23   | 0. 30775 | 9. 369567871 | 1  |
| MSTRG. 18447. 5  | 742  | 0. 44385 | 6. 242492676 | 1  |
| MSTRG. 18424. 4  | 542  | 0. 32613 | 11. 44842529 | 1  |
| MSTRG. 18424. 3  | 840  | 0. 39683 | 10. 99664307 | 1  |
| MSTRG. 18424. 2  | 975  | 0. 41069 | 10. 95465088 | 1  |
| MSTRG. 18425. 1  | 362  | 0. 35387 | 9. 03338623  | 1  |
| MSTRG. 18425. 2  | 362  | 0. 33471 | 9. 03338623  | 1  |
| MSTRG. 18425. 4  | 362  | 0. 3462  | 9. 03338623  | 1  |
| MSTRG. 18425. 3  | 362  | 0. 328   | 9. 03338623  | 1  |
| MSTRG. 18428. 3  | 387  | 0. 3982  | 8. 451721191 | 1  |
| MSTRG. 18428. 2  | 433  | 0. 40276 | 8. 889709473 | 1  |
| MSTRG. 18428. 4  | 139  | 0. 34759 | 10. 31976318 | 1  |
| MSTRG. 18428. 5  | 139  | 0. 3279  | 10. 31976318 | 1  |
| MSTRG. 18452. 2  | 165  | 0. 35818 | 7. 520080566 | 1  |
| MSTRG. 18449. 1  | 119  | 0. 40021 | 5. 277648926 | 1  |
| MSTRG. 18449. 2  | 100  | 0. 3819  | 6. 07208252  | 1  |
| MSTRG. 18453. 2  | 102  | 0. 35539 | 6. 960144043 | 1  |
| MSTRG. 18454. 2  | 193  | 0. 28031 | 11. 30584717 | 1  |
| MSTRG. 18454. 1  | 184  | 0. 33046 | 9. 903991699 | 1  |
| MSTRG. 18454. 3  | 184  | 0. 30341 | 9. 903991699 | 1  |
| MSTRG. 18459. 1  | 214  | 0. 33684 | 11. 70098877 | 1  |
| MSTRG. 18462. 1  | 859  | 0. 42098 | 6. 976379395 | -1 |
| MSTRG. 18462. 5  | 984  | 0. 42819 | 7. 203552246 | -1 |
| MSTRG. 18462. 7  | 859  | 0. 43493 | 6. 976379395 | -1 |
| MSTRG. 18455. 1  | 642  | 0. 44803 | 9. 149963379 | 1  |
| MSTRG. 18464. 1  | 169  | 0. 39861 | 6. 175476074 | -1 |
| MSTRG. 18466. 1  | 85   | 0. 33306 | 11. 8805542  | 1  |
| MSTRG. 18465. 3  | 1290 | 0. 40615 | 8. 152648926 | 1  |
| MSTRG. 18465. 2  | 1287 | 0. 44301 | 8. 018859863 | 1  |
| MSTRG. 18465. 5  | 1276 | 0. 43743 | 7. 681213379 | 1  |
| MSTRG. 18465. 4  | 1289 | 0. 43743 | 8. 152648926 | 1  |
| MSTRG. 18468. 2  | 383  | 0. 35728 | 9. 389465332 | 1  |
| MSTRG. 18470. 4  | 678  | 0. 38882 | 7. 034484863 | 1  |
| MSTRG. 18470. 6  | 131  | 0. 29959 | 6. 824157715 | 1  |
| MSTRG. 18470. 8  | 77   | 0. 31413 | 8. 237243652 | 1  |
| MSTRG. 18470. 9  | 718  | 0. 32317 | 6. 047790527 | 1  |
| MSTRG. 18470. 11 | 143  | 0. 26913 | 10. 57684326 | 1  |
| MSTRG. 18469. 2  | 1282 | 0. 44853 | 6. 504211426 | 1  |
| MSTRG. 18477. 2  | 1052 | 0. 46849 | 6. 209533691 | 1  |
| MSTRG. 18477. 1  | 1052 | 0. 44643 | 6. 209533691 | 1  |
| MSTRG. 18477. 3  | 1006 | 0. 46849 | 6. 33795166  | 1  |
| MSTRG. 18477. 4  | 932  | 0. 40709 | 6. 625305176 | 1  |
| MSTRG. 18477. 5  | 1059 | 0. 46849 | 6. 160583496 | 1  |
| MSTRG. 18477. 6  | 1055 | 0. 46849 | 6. 262023926 | 1  |
| MSTRG. 18477. 7  | 1049 | 0. 44643 | 6. 473449707 | 1  |
| MSTRG. 18477. 8  | 1013 | 0. 46849 | 6. 278991699 | 1  |
| MSTRG. 18477. 9  | 1006 | 0. 46601 | 6. 33795166  | 1  |
| MSTRG. 18477. 10 | 969  | 0. 44481 | 6. 610778809 | 1  |
| MSTRG. 18477. 11 | 27   | 0. 38705 | 8. 418884277 | 1  |
| MSTRG. 18477. 12 | 723  | 0. 37068 | 5. 942687988 | 1  |
| MSTRG. 18478. 1  | 68   | 0. 31588 | 10. 55731201 | 1  |
| MSTRG. 18477. 14 | 162  | 0. 34332 | 8. 85736084  | 1  |

|                  |      |          |              |    |
|------------------|------|----------|--------------|----|
| MSTRG. 18479. 1  | 132  | 0. 34417 | 10. 01702881 | 1  |
| MSTRG. 18479. 2  | 132  | 0. 30863 | 10. 01702881 | 1  |
| MSTRG. 18472. 8  | 496  | 0. 35107 | 9. 290100098 | 1  |
| MSTRG. 18473. 1  | 166  | 0. 36591 | 9. 394592285 | 1  |
| MSTRG. 18472. 12 | 423  | 0. 38667 | 9. 280700684 | 1  |
| MSTRG. 18474. 2  | 114  | 0. 34671 | 4. 84942627  | 1  |
| MSTRG. 18481. 1  | 928  | 0. 46012 | 6. 41986084  | 1  |
| MSTRG. 18482. 1  | 78   | 0. 3696  | 10. 67352295 | 1  |
| MSTRG. 18483. 2  | 53   | 0. 38837 | 9. 296813965 | 1  |
| MSTRG. 18484. 1  | 143  | 0. 32934 | 9. 546203613 | 1  |
| MSTRG. 18484. 2  | 143  | 0. 35561 | 9. 546203613 | 1  |
| MSTRG. 18484. 3  | 147  | 0. 41046 | 7. 003234863 | 1  |
| MSTRG. 18480. 2  | 264  | 0. 38767 | 9. 137878418 | 1  |
| MSTRG. 18485. 1  | 17   | 0. 41691 | 4. 207092285 | 1  |
| MSTRG. 18487. 1  | 84   | 0. 31402 | 8. 811462402 | 1  |
| MSTRG. 18487. 2  | 121  | 0. 30317 | 9. 726745605 | 1  |
| MSTRG. 18492. 2  | 1236 | 0. 48849 | 5. 149841309 | -1 |
| MSTRG. 18490. 1  | 105  | 0. 42735 | 10. 03399658 | -1 |
| MSTRG. 18499. 2  | 293  | 0. 43299 | 9. 068786621 | 1  |
| MSTRG. 18500. 1  | 77   | 0. 34417 | 9. 852722168 | 1  |
| MSTRG. 18504. 1  | 107  | 0. 27651 | 7. 805358887 | 1  |
| MSTRG. 18507. 4  | 103  | 0. 29772 | 6. 004211426 | 1  |
| MSTRG. 18507. 5  | 70   | 0. 3295  | 8. 676330566 | 1  |
| MSTRG. 18507. 6  | 52   | 0. 32244 | 6. 538391113 | 1  |
| MSTRG. 18508. 2  | 105  | 0. 32774 | 9. 553405762 | 1  |
| MSTRG. 18508. 3  | 105  | 0. 32698 | 9. 553405762 | 1  |
| MSTRG. 18511. 1  | 339  | 0. 35593 | 9. 37713623  | 1  |
| MSTRG. 18511. 2  | 339  | 0. 45703 | 9. 37713623  | 1  |
| MSTRG. 18511. 3  | 339  | 0. 46243 | 9. 37713623  | 1  |
| MSTRG. 18511. 4  | 339  | 0. 42062 | 9. 37713623  | 1  |
| MSTRG. 18513. 3  | 162  | 0. 32014 | 7. 365539551 | 1  |
| MSTRG. 18513. 2  | 162  | 0. 31962 | 7. 365539551 | 1  |
| MSTRG. 18516. 2  | 1007 | 0. 3889  | 6. 496154785 | 1  |
| MSTRG. 18516. 5  | 991  | 0. 37681 | 6. 809753418 | 1  |
| MSTRG. 18517. 1  | 39   | 0. 33605 | 7. 958679199 | 1  |
| MSTRG. 18514. 2  | 202  | 0. 40065 | 8. 870544434 | 1  |
| MSTRG. 18514. 3  | 176  | 0. 38679 | 7. 675354004 | 1  |
| MSTRG. 18514. 4  | 447  | 0. 47294 | 5. 424987793 | 1  |
| MSTRG. 18519. 1  | 41   | 0. 32701 | 11. 73394775 | 1  |
| MSTRG. 18524. 1  | 821  | 0. 46029 | 6. 198059082 | 1  |
| MSTRG. 18524. 2  | 787  | 0. 40643 | 6. 234069824 | 1  |
| MSTRG. 18524. 4  | 692  | 0. 45764 | 6. 261779785 | 1  |
| MSTRG. 18527. 1  | 1157 | 0. 41803 | 6. 42010498  | 1  |
| MSTRG. 18527. 2  | 53   | 0. 34016 | 10. 00860596 | 1  |
| MSTRG. 18529. 3  | 178  | 0. 43518 | 7. 65814209  | 1  |
| MSTRG. 18529. 5  | 324  | 0. 43565 | 5. 755310059 | 1  |
| MSTRG. 18529. 4  | 324  | 0. 43858 | 5. 755310059 | 1  |
| MSTRG. 18530. 1  | 122  | 0. 28478 | 5. 652893066 | 1  |
| MSTRG. 18530. 2  | 122  | 0. 29687 | 5. 652893066 | 1  |
| MSTRG. 18531. 1  | 103  | 0. 35403 | 6. 573059082 | 1  |
| MSTRG. 18536. 1  | 20   | 0. 34536 | 12. 00848389 | 1  |
| MSTRG. 18538. 1  | 30   | 0. 38773 | 10. 17108154 | 1  |
| MSTRG. 18540. 1  | 95   | 0. 41788 | 5. 108703613 | 1  |
| MSTRG. 18600. 2  | 84   | 0. 29619 | 10. 53216553 | 1  |

|                  |     |          |              |    |
|------------------|-----|----------|--------------|----|
| MSTRG. 18614. 1  | 120 | 0. 3609  | 9. 151184082 | 1  |
| MSTRG. 18615. 1  | 83  | 0. 35532 | 7. 955627441 | 1  |
| MSTRG. 18626. 2  | 80  | 0. 34139 | 9. 981750488 | 1  |
| MSTRG. 18622. 6  | 91  | 0. 29367 | 8. 623962402 | 1  |
| MSTRG. 18622. 7  | 60  | 0. 29543 | 4. 950012207 | 1  |
| MSTRG. 18631. 2  | 152 | 0. 34431 | 7. 196594238 | 1  |
| MSTRG. 18631. 3  | 74  | 0. 30905 | 9. 671813965 | 1  |
| MSTRG. 18632. 1  | 135 | 0. 30789 | 9. 919372559 | 1  |
| MSTRG. 18631. 4  | 152 | 0. 30725 | 7. 196594238 | 1  |
| MSTRG. 18633. 1  | 33  | 0. 29404 | 7. 923034668 | 1  |
| MSTRG. 18622. 8  | 165 | 0. 44876 | 9. 221008301 | 1  |
| MSTRG. 18622. 14 | 165 | 0. 45426 | 9. 221008301 | 1  |
| MSTRG. 18631. 6  | 269 | 0. 34803 | 5. 19342041  | -1 |
| MSTRG. 18631. 7  | 57  | 0. 42172 | 3. 794616699 | 1  |
| MSTRG. 18622. 16 | 61  | 0. 38348 | 6. 50201416  | -1 |
| MSTRG. 18622. 17 | 124 | 0. 31553 | 6. 688903809 | 1  |
| MSTRG. 18631. 9  | 152 | 0. 40797 | 7. 196594238 | 1  |
| MSTRG. 18631. 8  | 516 | 0. 35435 | 5. 289245605 | 1  |
| MSTRG. 18622. 20 | 81  | 0. 28683 | 6. 366638184 | 1  |
| MSTRG. 18622. 21 | 81  | 0. 28683 | 6. 366638184 | 1  |
| MSTRG. 18622. 22 | 46  | 0. 37618 | 9. 77923584  | 1  |
| MSTRG. 18631. 10 | 557 | 0. 3915  | 5. 143493652 | -1 |
| MSTRG. 18622. 34 | 165 | 0. 40019 | 9. 221008301 | 1  |
| MSTRG. 18638. 1  | 82  | 0. 3325  | 8. 770446777 | -1 |
| MSTRG. 18637. 1  | 48  | 0. 36246 | 9. 961730957 | 1  |
| MSTRG. 18542. 3  | 363 | 0. 35948 | 11. 23760986 | 1  |
| MSTRG. 18546. 4  | 248 | 0. 48458 | 8. 13104248  | 1  |
| MSTRG. 18546. 5  | 98  | 0. 29772 | 5. 616271973 | 1  |
| MSTRG. 18546. 6  | 129 | 0. 28982 | 10. 22515869 | 1  |
| MSTRG. 18546. 7  | 141 | 0. 29892 | 5. 721496582 | 1  |
| MSTRG. 18546. 8  | 189 | 0. 29607 | 6. 847473145 | 1  |
| MSTRG. 18546. 9  | 189 | 0. 29772 | 10. 17498779 | 1  |
| MSTRG. 18546. 10 | 189 | 0. 29772 | 6. 847473145 | 1  |
| MSTRG. 18546. 11 | 134 | 0. 27767 | 7. 000061035 | 1  |
| MSTRG. 18546. 12 | 117 | 0. 2921  | 8. 668151855 | 1  |
| MSTRG. 18546. 13 | 191 | 0. 27918 | 6. 329040527 | 1  |
| MSTRG. 18546. 14 | 191 | 0. 32916 | 6. 329040527 | 1  |
| MSTRG. 18548. 2  | 2   | 0. 33937 | 4. 298156738 | 1  |
| MSTRG. 18551. 1  | 150 | 0. 32237 | 9. 09576416  | 1  |
| MSTRG. 18552. 1  | 115 | 0. 28771 | 9. 324035645 | 1  |
| MSTRG. 18552. 2  | 89  | 0. 28496 | 8. 935119629 | 1  |
| MSTRG. 18555. 1  | 758 | 0. 35633 | 6. 500061035 | 1  |
| MSTRG. 18555. 2  | 758 | 0. 36255 | 6. 500061035 | 1  |
| MSTRG. 18557. 4  | 250 | 0. 40616 | 5. 608215332 | 1  |
| MSTRG. 18558. 1  | 72  | 0. 31997 | 7. 847595215 | 1  |
| MSTRG. 18559. 1  | 665 | 0. 38409 | 5. 914367676 | 1  |
| MSTRG. 18559. 4  | 604 | 0. 36064 | 5. 793640137 | 1  |
| MSTRG. 18559. 6  | 665 | 0. 38291 | 5. 914367676 | 1  |
| MSTRG. 18561. 1  | 838 | 0. 4477  | 5. 969543457 | 1  |
| MSTRG. 18561. 3  | 199 | 0. 35659 | 4. 564025879 | 1  |
| MSTRG. 18562. 1  | 107 | 0. 40861 | 7. 764709473 | 1  |
| MSTRG. 18562. 2  | 156 | 0. 44755 | 9. 411193848 | 1  |
| MSTRG. 18562. 3  | 336 | 0. 47348 | 6. 42791748  | 1  |
| MSTRG. 18563. 1  | 41  | 0. 27996 | 12. 00567627 | 1  |

|                  |      |          |              |    |
|------------------|------|----------|--------------|----|
| MSTRG. 18564. 1  | 355  | 0. 32915 | 9. 45501709  | 1  |
| MSTRG. 18564. 2  | 355  | 0. 36289 | 9. 45501709  | 1  |
| MSTRG. 18565. 1  | 207  | 0. 35188 | 4. 993469238 | 1  |
| MSTRG. 18565. 2  | 207  | 0. 36168 | 4. 993469238 | 1  |
| MSTRG. 18568. 1  | 1373 | 0. 46494 | 6. 039733887 | 1  |
| MSTRG. 18568. 3  | 451  | 0. 42455 | 6. 332214355 | 1  |
| MSTRG. 18568. 6  | 265  | 0. 39797 | 5. 204040527 | 1  |
| MSTRG. 18572. 1  | 873  | 0. 42948 | 5. 713928223 | 1  |
| MSTRG. 18572. 4  | 873  | 0. 44176 | 5. 713928223 | 1  |
| MSTRG. 18574. 4  | 931  | 0. 47994 | 8. 668640137 | 1  |
| MSTRG. 18574. 5  | 931  | 0. 49839 | 8. 668640137 | 1  |
| MSTRG. 18574. 6  | 910  | 0. 47622 | 8. 799621582 | 1  |
| MSTRG. 18574. 7  | 88   | 0. 32477 | 10. 22894287 | 1  |
| MSTRG. 18567. 2  | 151  | 0. 32246 | 9. 908508301 | 1  |
| MSTRG. 18589. 1  | 35   | 0. 34427 | 7. 957336426 | -1 |
| MSTRG. 18590. 1  | 32   | 0. 33804 | 10. 11859131 | 1  |
| MSTRG. 18594. 2  | 227  | 0. 38845 | 9. 096740723 | 1  |
| MSTRG. 18594. 3  | 115  | 0. 3841  | 6. 801452637 | 1  |
| MSTRG. 18594. 5  | 167  | 0. 37679 | 5. 084777832 | 1  |
| MSTRG. 18594. 6  | 116  | 0. 36609 | 9. 722229004 | 1  |
| MSTRG. 18594. 7  | 133  | 0. 39729 | 8. 754699707 | 1  |
| MSTRG. 18654. 3  | 113  | 0. 33207 | 10. 77484131 | 1  |
| MSTRG. 18654. 4  | 4146 | 0. 45867 | 6. 80645752  | 1  |
| MSTRG. 18656. 1  | 41   | 0. 36243 | 6. 901794434 | 1  |
| MSTRG. 18645. 1  | 145  | 0. 27803 | 7. 792541504 | 1  |
| MSTRG. 18647. 2  | 208  | 0. 48731 | 5. 37701416  | 1  |
| MSTRG. 18653. 1  | 71   | 0. 4478  | 4. 55657959  | 1  |
| MSTRG. 18659. 1  | 180  | 0. 45569 | 9. 09552002  | 1  |
| MSTRG. 18659. 5  | 161  | 0. 29387 | 5. 143249512 | 1  |
| MSTRG. 18662. 5  | 1589 | 0. 44834 | 5. 325256348 | 1  |
| MSTRG. 18662. 3  | 1589 | 0. 44902 | 5. 325256348 | 1  |
| MSTRG. 18666. 8  | 191  | 0. 34812 | 6. 279724121 | 1  |
| MSTRG. 18666. 9  | 118  | 0. 35072 | 7. 700378418 | 1  |
| MSTRG. 18666. 4  | 176  | 0. 37421 | 8. 642883301 | 1  |
| MSTRG. 18666. 5  | 118  | 0. 35371 | 7. 700378418 | 1  |
| MSTRG. 18666. 6  | 118  | 0. 37421 | 7. 700378418 | 1  |
| MSTRG. 18666. 7  | 118  | 0. 35576 | 7. 700378418 | 1  |
| MSTRG. 18666. 10 | 191  | 0. 33711 | 6. 279724121 | 1  |
| MSTRG. 18667. 2  | 297  | 0. 35894 | 10. 14678955 | 1  |
| MSTRG. 18677. 1  | 90   | 0. 29059 | 7. 613220215 | 1  |
| MSTRG. 18679. 3  | 70   | 0. 43627 | 9. 151550293 | 1  |
| MSTRG. 18681. 1  | 67   | 0. 3263  | 6. 22845459  | 1  |
| MSTRG. 18684. 2  | 293  | 0. 37697 | 8. 363098145 | 1  |
| MSTRG. 18685. 1  | 30   | 0. 3626  | 10. 65545654 | 1  |
| MSTRG. 18698. 1  | 169  | 0. 27622 | 5. 483459473 | 1  |
| MSTRG. 18697. 4  | 241  | 0. 45816 | 8. 807678223 | 1  |
| MSTRG. 18702. 2  | 366  | 0. 30816 | 9. 870056152 | 1  |
| MSTRG. 18703. 1  | 125  | 0. 30467 | 10. 24017334 | 1  |
| MSTRG. 18704. 1  | 70   | 0. 28334 | 10. 05584717 | 1  |
| MSTRG. 18705. 1  | 67   | 0. 3261  | 6. 695129395 | 1  |
| MSTRG. 18706. 1  | 136  | 0. 29367 | 8. 635559082 | 1  |
| MSTRG. 18707. 1  | 90   | 0. 28562 | 5. 457946777 | 1  |
| MSTRG. 18709. 2  | 406  | 0. 3287  | 9. 256408691 | 1  |
| MSTRG. 18709. 3  | 344  | 0. 29526 | 9. 362609863 | 1  |

|                 |      |          |              |    |
|-----------------|------|----------|--------------|----|
| MSTRG. 18709. 4 | 195  | 0. 28883 | 6. 410949707 | 1  |
| MSTRG. 18711. 4 | 212  | 0. 38059 | 6. 080993652 | 1  |
| MSTRG. 18713. 1 | 37   | 0. 3291  | 9. 648132324 | 1  |
| MSTRG. 18715. 2 | 111  | 0. 39651 | 5. 038024902 | -1 |
| MSTRG. 18715. 4 | 550  | 0. 4605  | 7. 991149902 | -1 |
| MSTRG. 18722. 1 | 99   | 0. 35251 | 7. 955871582 | 1  |
| MSTRG. 18725. 6 | 587  | 0. 36389 | 6. 93145752  | 1  |
| MSTRG. 18725. 7 | 632  | 0. 35371 | 6. 741149902 | 1  |
| MSTRG. 18726. 1 | 48   | 0. 32015 | 9. 057434082 | 1  |
| MSTRG. 18718. 1 | 101  | 0. 31587 | 5. 807678223 | 1  |
| MSTRG. 18732. 2 | 101  | 0. 27517 | 7. 82598877  | 1  |
| MSTRG. 18733. 1 | 78   | 0. 36365 | 6. 527526855 | 1  |
| MSTRG. 18734. 1 | 100  | 0. 28982 | 9. 302429199 | 1  |
| MSTRG. 18734. 2 | 67   | 0. 27937 | 9. 260559082 | 1  |
| MSTRG. 18741. 3 | 323  | 0. 36626 | 8. 992736816 | 1  |
| MSTRG. 18743. 3 | 199  | 0. 34444 | 5. 622131348 | 1  |
| MSTRG. 18744. 1 | 221  | 0. 35161 | 4. 287780762 | 1  |
| MSTRG. 18749. 1 | 1223 | 0. 46794 | 6. 480407715 | 1  |
| MSTRG. 18749. 2 | 1223 | 0. 45648 | 6. 480407715 | 1  |
| MSTRG. 18749. 3 | 1223 | 0. 39484 | 6. 480407715 | 1  |
| MSTRG. 18750. 1 | 34   | 0. 34078 | 5. 596496582 | 1  |
| MSTRG. 18751. 2 | 177  | 0. 3638  | 8. 965637207 | 1  |
| MSTRG. 18751. 4 | 177  | 0. 4593  | 8. 965637207 | 1  |
| MSTRG. 18752. 1 | 681  | 0. 46102 | 6. 445617676 | 1  |
| MSTRG. 18752. 2 | 681  | 0. 47283 | 6. 445617676 | 1  |
| MSTRG. 18762. 2 | 315  | 0. 3852  | 8. 868713379 | 1  |
| MSTRG. 18762. 1 | 271  | 0. 3852  | 9. 096740723 | 1  |
| MSTRG. 18763. 1 | 1211 | 0. 47647 | 5. 990783691 | 1  |
| MSTRG. 18762. 3 | 315  | 0. 41695 | 8. 868713379 | 1  |
| MSTRG. 18764. 1 | 119  | 0. 30303 | 9. 358093262 | 1  |
| MSTRG. 18762. 4 | 189  | 0. 41702 | 6. 20904541  | 1  |
| MSTRG. 18763. 2 | 898  | 0. 45114 | 6. 017028809 | 1  |
| MSTRG. 18763. 4 | 1211 | 0. 45761 | 5. 990783691 | 1  |
| MSTRG. 18763. 5 | 1210 | 0. 45761 | 5. 990783691 | 1  |
| MSTRG. 18763. 7 | 1034 | 0. 48364 | 6. 011779785 | 1  |
| MSTRG. 18768. 2 | 1909 | 0. 449   | 5. 762756348 | 1  |
| MSTRG. 18756. 1 | 194  | 0. 49177 | 4. 358093262 | 1  |
| MSTRG. 18761. 1 | 868  | 0. 34785 | 9. 159973145 | 1  |
| MSTRG. 18769. 5 | 1348 | 0. 36918 | 6. 282409668 | 1  |
| MSTRG. 18769. 6 | 1465 | 0. 41369 | 6. 193664551 | 1  |
| MSTRG. 18770. 1 | 123  | 0. 27306 | 7. 586730957 | 1  |
| MSTRG. 18771. 1 | 74   | 0. 32422 | 9. 468566895 | -1 |
| MSTRG. 18772. 1 | 40   | 0. 28966 | 5. 086242676 | 1  |
| MSTRG. 18773. 1 | 35   | 0. 34229 | 8. 938903809 | 1  |
| MSTRG. 18776. 1 | 49   | 0. 40621 | 6. 699890137 | 1  |
| MSTRG. 18805. 1 | 283  | 0. 2895  | 9. 19354248  | 1  |
| MSTRG. 18805. 2 | 224  | 0. 31917 | 9. 553771973 | 1  |
| MSTRG. 18816. 4 | 202  | 0. 41984 | 9. 623840332 | -1 |
| MSTRG. 18816. 5 | 75   | 0. 32954 | 8. 507019043 | 1  |
| MSTRG. 18818. 2 | 102  | 0. 31389 | 9. 030944824 | 1  |
| MSTRG. 18825. 7 | 556  | 0. 29089 | 9. 633361816 | 1  |
| MSTRG. 18829. 1 | 83   | 0. 31446 | 8. 570007324 | 1  |
| MSTRG. 18821. 1 | 50   | 0. 31368 | 4. 324645996 | 1  |
| MSTRG. 18822. 4 | 112  | 0. 38883 | 4. 737243652 | 1  |

|                 |      |          |              |    |
|-----------------|------|----------|--------------|----|
| MSTRG. 18830. 2 | 157  | 0. 30159 | 9. 37286377  | 1  |
| MSTRG. 18830. 3 | 36   | 0. 45292 | 4. 921447754 | -1 |
| MSTRG. 18838. 1 | 102  | 0. 41288 | 10. 5067749  | -1 |
| MSTRG. 18841. 1 | 99   | 0. 34444 | 10. 0413208  | 1  |
| MSTRG. 18850. 1 | 24   | 0. 41095 | 11. 00860596 | 1  |
| MSTRG. 18852. 1 | 2388 | 0. 42024 | 6. 279602051 | 1  |
| MSTRG. 18861. 1 | 129  | 0. 36658 | 6. 472473145 | 1  |
| MSTRG. 18862. 1 | 101  | 0. 41634 | 5. 88494873  | -1 |
| MSTRG. 18872. 1 | 40   | 0. 3701  | 5. 935241699 | -1 |
| MSTRG. 18882. 1 | 67   | 0. 30055 | 8. 63067627  | 1  |
| MSTRG. 18894. 1 | 97   | 0. 41788 | 5. 14276123  | 1  |
| MSTRG. 18894. 4 | 140  | 0. 44918 | 5. 530212402 | 1  |
| MSTRG. 18894. 6 | 97   | 0. 41844 | 5. 14276123  | 1  |
| MSTRG. 18894. 7 | 120  | 0. 46224 | 7. 735778809 | 1  |
| MSTRG. 18894. 3 | 97   | 0. 47602 | 5. 14276123  | 1  |
| MSTRG. 18894. 5 | 140  | 0. 41451 | 5. 530212402 | 1  |
| MSTRG. 18906. 1 | 92   | 0. 29187 | 10. 92486572 | 1  |
| MSTRG. 18907. 1 | 78   | 0. 32971 | 9. 662780762 | 1  |
| MSTRG. 18908. 1 | 42   | 0. 35831 | 9. 620666504 | 1  |
| MSTRG. 18911. 1 | 54   | 0. 38524 | 7. 948181152 | 1  |
| MSTRG. 18917. 2 | 630  | 0. 46653 | 4. 54498291  | 1  |
| MSTRG. 18917. 3 | 630  | 0. 45184 | 4. 54498291  | 1  |
| MSTRG. 18958. 1 | 37   | 0. 35781 | 8. 887023926 | 1  |
| MSTRG. 18967. 1 | 222  | 0. 46849 | 6. 128356934 | 1  |
| MSTRG. 18967. 3 | 1695 | 0. 46831 | 4. 90423584  | -1 |
| MSTRG. 18955. 1 | 81   | 0. 36493 | 10. 31524658 | 1  |
| MSTRG. 18979. 1 | 106  | 0. 45971 | 11. 51177979 | 1  |
| MSTRG. 18983. 2 | 1090 | 0. 45905 | 6. 332214355 | 1  |
| MSTRG. 18986. 1 | 147  | 0. 29746 | 10. 22747803 | 1  |
| MSTRG. 18987. 1 | 293  | 0. 349   | 8. 61907959  | 1  |
| MSTRG. 18984. 2 | 91   | 0. 44753 | 9. 098205566 | 1  |
| MSTRG. 18997. 1 | 124  | 0. 39435 | 6. 412658691 | 1  |
| MSTRG. 18997. 2 | 124  | 0. 351   | 6. 412658691 | 1  |
| MSTRG. 18999. 1 | 77   | 0. 33438 | 10. 50933838 | 1  |
| MSTRG. 18999. 2 | 306  | 0. 4614  | 6. 473571777 | -1 |
| MSTRG. 19005. 1 | 150  | 0. 28498 | 7. 717834473 | 1  |
| MSTRG. 19006. 1 | 158  | 0. 29367 | 6. 359680176 | 1  |
| MSTRG. 19014. 6 | 757  | 0. 46866 | 5. 215881348 | 1  |
| MSTRG. 19014. 5 | 632  | 0. 47271 | 5. 261901855 | 1  |
| MSTRG. 19015. 1 | 10   | 0. 39517 | 4. 36907959  | 1  |
| MSTRG. 19015. 2 | 21   | 0. 35748 | 7. 976013184 | 1  |
| MSTRG. 19015. 3 | 52   | 0. 37628 | 10. 01409912 | 1  |
| MSTRG. 19009. 1 | 18   | 0. 45234 | 9. 524963379 | 1  |
| MSTRG. 19024. 1 | 40   | 0. 3962  | 5. 425842285 | 1  |
| MSTRG. 19041. 1 | 55   | 0. 37105 | 9. 742248535 | -1 |
| MSTRG. 19049. 1 | 150  | 0. 29202 | 5. 434509277 | 1  |
| MSTRG. 19049. 2 | 150  | 0. 29367 | 5. 434509277 | 1  |
| MSTRG. 19049. 3 | 31   | 0. 37326 | 4. 225524902 | 1  |
| MSTRG. 19049. 4 | 69   | 0. 31958 | 5. 834289551 | 1  |
| MSTRG. 19052. 2 | 184  | 0. 3823  | 9. 473571777 | 1  |
| MSTRG. 19034. 1 | 84   | 0. 34768 | 10. 42938232 | 1  |
| MSTRG. 19038. 1 | 69   | 0. 39429 | 9. 621276855 | 1  |
| MSTRG. 19039. 3 | 280  | 0. 38859 | 4. 410949707 | 1  |
| MSTRG. 19053. 2 | 467  | 0. 37812 | 9. 332214355 | 1  |



|                 |      |          |              |    |
|-----------------|------|----------|--------------|----|
| MSTRG. 19053. 3 | 467  | 0. 36782 | 9. 332214355 | 1  |
| MSTRG. 19059. 4 | 2791 | 0. 45295 | 5. 598205566 | 1  |
| MSTRG. 19059. 3 | 2781 | 0. 4839  | 5. 628112793 | 1  |
| MSTRG. 19061. 1 | 334  | 0. 46673 | 6. 212097168 | -1 |
| MSTRG. 19063. 1 | 112  | 0. 31867 | 9. 779602051 | 1  |
| MSTRG. 19066. 1 | 121  | 0. 28612 | 5. 64642334  | 1  |
| MSTRG. 19068. 2 | 30   | 0. 40805 | 10. 04425049 | 1  |
| MSTRG. 19069. 1 | 245  | 0. 33245 | 4. 726257324 | 1  |
| MSTRG. 19069. 2 | 245  | 0. 3272  | 4. 726257324 | 1  |
| MSTRG. 19069. 4 | 245  | 0. 33851 | 4. 726257324 | 1  |
| MSTRG. 19069. 6 | 142  | 0. 28165 | 12. 19769287 | 1  |
| MSTRG. 19072. 1 | 636  | 0. 45909 | 9. 515197754 | 1  |
| MSTRG. 19072. 2 | 636  | 0. 46442 | 9. 515197754 | 1  |
| MSTRG. 19072. 3 | 636  | 0. 47408 | 9. 515197754 | 1  |
| MSTRG. 19072. 4 | 563  | 0. 46883 | 9. 658874512 | 1  |
| MSTRG. 19073. 3 | 63   | 0. 35565 | 5. 768493652 | 1  |
| MSTRG. 19075. 1 | 133  | 0. 29772 | 10. 0256958  | 1  |
| MSTRG. 19089. 2 | 557  | 0. 3195  | 8. 228820801 | 1  |
| MSTRG. 19089. 3 | 795  | 0. 46678 | 8. 508728027 | 1  |
| MSTRG. 19090. 2 | 58   | 0. 30419 | 9. 265441895 | 1  |
| MSTRG. 19094. 1 | 1266 | 0. 44981 | 8. 476501465 | 1  |
| MSTRG. 19094. 2 | 1269 | 0. 48853 | 8. 288757324 | 1  |
| MSTRG. 19094. 3 | 1322 | 0. 4695  | 8. 569885254 | 1  |
| MSTRG. 19094. 5 | 523  | 0. 44208 | 8. 796081543 | 1  |
| MSTRG. 19095. 1 | 58   | 0. 42372 | 11. 54656982 | 1  |
| MSTRG. 19096. 1 | 3992 | 0. 45158 | 6. 10333252  | 1  |
| MSTRG. 19099. 1 | 58   | 0. 33559 | 7. 636779785 | 1  |
| MSTRG. 19100. 1 | 77   | 0. 47759 | 4. 465881348 | -1 |
| MSTRG. 19101. 1 | 107  | 0. 29761 | 9. 508239746 | 1  |
| MSTRG. 19078. 2 | 418  | 0. 42322 | 5. 125793457 | 1  |
| MSTRG. 19078. 3 | 260  | 0. 27918 | 4. 908508301 | 1  |
| MSTRG. 19079. 1 | 82   | 0. 29502 | 5. 785095215 | 1  |
| MSTRG. 19081. 1 | 211  | 0. 3582  | 9. 533752441 | 1  |
| MSTRG. 19083. 1 | 62   | 0. 36712 | 7. 649475098 | 1  |
| MSTRG. 19084. 3 | 255  | 0. 43202 | 8. 809997559 | 1  |
| MSTRG. 19085. 1 | 107  | 0. 3366  | 6. 155456543 | 1  |
| MSTRG. 19107. 3 | 939  | 0. 40207 | 6. 694641113 | 1  |
| MSTRG. 19110. 1 | 57   | 0. 33824 | 6. 367004395 | -1 |
| MSTRG. 19113. 4 | 214  | 0. 38971 | 7. 855285645 | 1  |
| MSTRG. 19115. 4 | 483  | 0. 41248 | 5. 829528809 | 1  |
| MSTRG. 19115. 5 | 483  | 0. 46879 | 5. 829528809 | 1  |
| MSTRG. 19116. 2 | 80   | 0. 30104 | 10. 14630127 | 1  |
| MSTRG. 19116. 4 | 134  | 0. 44369 | 8. 622741699 | 1  |
| MSTRG. 19117. 2 | 376  | 0. 38208 | 8. 331970215 | 1  |
| MSTRG. 19121. 1 | 32   | 0. 41338 | 4. 239562988 | 1  |
| MSTRG. 19122. 1 | 14   | 0. 4316  | 5. 58770752  | 1  |
| MSTRG. 19126. 2 | 131  | 0. 32237 | 4. 888366699 | 1  |
| MSTRG. 19127. 1 | 12   | 0. 35712 | 9. 700256348 | 1  |
| MSTRG. 19129. 1 | 241  | 0. 28419 | 9. 573425293 | 1  |
| MSTRG. 19129. 2 | 222  | 0. 32642 | 9. 536193848 | 1  |
| MSTRG. 19129. 4 | 222  | 0. 34378 | 9. 536193848 | 1  |
| MSTRG. 19129. 5 | 241  | 0. 30605 | 9. 573425293 | 1  |
| MSTRG. 19131. 8 | 95   | 0. 38965 | 4. 710510254 | 1  |
| MSTRG. 19131. 7 | 164  | 0. 32663 | 4. 112487793 | 1  |

|                  |      |          |              |    |
|------------------|------|----------|--------------|----|
| MSTRG. 19131. 4  | 171  | 0. 28883 | 5. 855163574 | 1  |
| MSTRG. 19131. 5  | 95   | 0. 27838 | 4. 710510254 | 1  |
| MSTRG. 19131. 6  | 171  | 0. 27838 | 5. 855163574 | 1  |
| MSTRG. 19133. 3  | 112  | 0. 36161 | 8. 330993652 | 1  |
| MSTRG. 19133. 4  | 112  | 0. 33347 | 8. 330993652 | 1  |
| MSTRG. 19134. 3  | 660  | 0. 35421 | 8. 058776855 | 1  |
| MSTRG. 19134. 4  | 472  | 0. 27234 | 8. 336730957 | 1  |
| MSTRG. 19136. 1  | 75   | 0. 36021 | 10. 3817749  | 1  |
| MSTRG. 19138. 1  | 1614 | 0. 40219 | 4. 868713379 | 1  |
| MSTRG. 19142. 5  | 538  | 0. 37112 | 6. 166931152 | 1  |
| MSTRG. 19148. 3  | 933  | 0. 46926 | 7. 452575684 | 1  |
| MSTRG. 19148. 4  | 193  | 0. 37434 | 8. 905334473 | 1  |
| MSTRG. 19150. 1  | 984  | 0. 38703 | 6. 558410645 | 1  |
| MSTRG. 19150. 2  | 984  | 0. 36854 | 6. 558410645 | 1  |
| MSTRG. 19152. 2  | 188  | 0. 44294 | 9. 960266113 | 1  |
| MSTRG. 19144. 1  | 25   | 0. 36331 | 8. 190246582 | 1  |
| MSTRG. 19146. 1  | 28   | 0. 38128 | 8. 496154785 | 1  |
| MSTRG. 19155. 1  | 38   | 0. 3681  | 8. 039978027 | 1  |
| MSTRG. 19156. 1  | 59   | 0. 35564 | 10. 53375244 | -1 |
| MSTRG. 19158. 4  | 265  | 0. 32661 | 6. 018127441 | 1  |
| MSTRG. 19175. 1  | 82   | 0. 31273 | 10. 53179932 | 1  |
| MSTRG. 19177. 4  | 287  | 0. 27517 | 9. 667907715 | 1  |
| MSTRG. 19177. 1  | 283  | 0. 45957 | 5. 646057129 | 1  |
| MSTRG. 19177. 3  | 137  | 0. 38615 | 4. 710998535 | 1  |
| MSTRG. 19177. 5  | 283  | 0. 4589  | 5. 646057129 | 1  |
| MSTRG. 19177. 6  | 63   | 0. 31226 | 9. 33404541  | 1  |
| MSTRG. 19177. 7  | 481  | 0. 33029 | 8. 643859863 | 1  |
| MSTRG. 19177. 8  | 468  | 0. 44225 | 8. 93951416  | 1  |
| MSTRG. 19177. 9  | 346  | 0. 39641 | 9. 29876709  | 1  |
| MSTRG. 19177. 10 | 378  | 0. 34002 | 9. 289978027 | 1  |
| MSTRG. 19177. 12 | 88   | 0. 30981 | 9. 504089355 | 1  |
| MSTRG. 19177. 13 | 144  | 0. 43545 | 4. 722351074 | 1  |
| MSTRG. 19183. 1  | 122  | 0. 3438  | 9. 44342041  | 1  |
| MSTRG. 19183. 2  | 89   | 0. 34135 | 8. 958068848 | 1  |
| MSTRG. 19189. 2  | 133  | 0. 37362 | 9. 570983887 | 1  |
| MSTRG. 19166. 2  | 74   | 0. 36487 | 10. 36334229 | 1  |
| MSTRG. 19166. 3  | 673  | 0. 45254 | 6. 388122559 | 1  |
| MSTRG. 19168. 1  | 84   | 0. 43011 | 10. 01239014 | 1  |
| MSTRG. 19169. 4  | 506  | 0. 44341 | 7. 984680176 | 1  |
| MSTRG. 19171. 7  | 186  | 0. 30777 | 7. 623718262 | 1  |
| MSTRG. 19171. 2  | 186  | 0. 38722 | 7. 623718262 | 1  |
| MSTRG. 19171. 3  | 302  | 0. 48326 | 6. 756530762 | 1  |
| MSTRG. 19171. 4  | 186  | 0. 42363 | 7. 623718262 | 1  |
| MSTRG. 19171. 5  | 186  | 0. 38722 | 7. 623718262 | 1  |
| MSTRG. 19171. 6  | 294  | 0. 36594 | 7. 186462402 | 1  |
| MSTRG. 19194. 2  | 269  | 0. 42175 | 9. 442077637 | 1  |
| MSTRG. 19196. 1  | 63   | 0. 34713 | 4. 135925293 | 1  |
| MSTRG. 19196. 2  | 114  | 0. 35739 | 6. 820617676 | 1  |
| MSTRG. 19203. 1  | 346  | 0. 48131 | 8. 932922363 | 1  |
| MSTRG. 19203. 2  | 108  | 0. 40899 | 6. 707580566 | 1  |
| MSTRG. 19204. 3  | 293  | 0. 36161 | 6. 164001465 | 1  |
| MSTRG. 19205. 1  | 67   | 0. 38792 | 9. 664367676 | 1  |
| MSTRG. 19205. 2  | 67   | 0. 35645 | 9. 664367676 | 1  |
| MSTRG. 19205. 3  | 67   | 0. 37162 | 9. 664367676 | 1  |

|                 |     |          |              |    |
|-----------------|-----|----------|--------------|----|
| MSTRG. 19206. 1 | 79  | 0. 38961 | 10. 13580322 | -1 |
| MSTRG. 19207. 2 | 121 | 0. 37318 | 9. 89251709  | 1  |
| MSTRG. 19210. 5 | 143 | 0. 29583 | 10. 31854248 | 1  |
| MSTRG. 19210. 6 | 810 | 0. 28624 | 5. 298278809 | 1  |
| MSTRG. 19210. 4 | 509 | 0. 3743  | 5. 924865723 | 1  |
| MSTRG. 19210. 7 | 509 | 0. 34079 | 5. 924865723 | 1  |
| MSTRG. 19210. 3 | 921 | 0. 33851 | 5. 812805176 | 1  |
| MSTRG. 19210. 8 | 87  | 0. 33718 | 10. 67205811 | 1  |
| MSTRG. 19197. 1 | 167 | 0. 34932 | 10. 31707764 | 1  |
| MSTRG. 19202. 1 | 59  | 0. 37367 | 9. 29107666  | 1  |
| MSTRG. 19213. 1 | 100 | 0. 36651 | 10. 17657471 | 1  |
| MSTRG. 19213. 2 | 55  | 0. 36048 | 9. 494445801 | 1  |
| MSTRG. 19215. 1 | 209 | 0. 38921 | 10. 59783936 | 1  |
| MSTRG. 19217. 4 | 473 | 0. 45509 | 6. 054992676 | 1  |
| MSTRG. 19217. 2 | 595 | 0. 47081 | 5. 629699707 | 1  |
| MSTRG. 19217. 5 | 470 | 0. 45201 | 6. 085876465 | 1  |
| MSTRG. 19218. 1 | 37  | 0. 30609 | 6. 508361816 | -1 |
| MSTRG. 19318. 1 | 124 | 0. 35631 | 11. 1416626  | 1  |
| MSTRG. 19319. 3 | 293 | 0. 39473 | 7. 69354248  | 1  |
| MSTRG. 19323. 1 | 143 | 0. 3701  | 10. 97833252 | 1  |
| MSTRG. 19319. 4 | 98  | 0. 29178 | 7. 785583496 | 1  |
| MSTRG. 19319. 5 | 128 | 0. 3     | 9. 857116699 | 1  |
| MSTRG. 19319. 6 | 107 | 0. 32213 | 8. 455871582 | 1  |
| MSTRG. 19325. 1 | 74  | 0. 29826 | 10. 58843994 | 1  |
| MSTRG. 19325. 2 | 113 | 0. 2908  | 9. 919006348 | 1  |
| MSTRG. 19326. 1 | 139 | 0. 2895  | 10. 1116333  | 1  |
| MSTRG. 19328. 1 | 149 | 0. 29367 | 10. 21502686 | 1  |
| MSTRG. 19338. 1 | 107 | 0. 34583 | 9. 14251709  | 1  |
| MSTRG. 19339. 1 | 186 | 0. 28982 | 10. 35345459 | 1  |
| MSTRG. 19340. 1 | 113 | 0. 29367 | 9. 764709473 | 1  |
| MSTRG. 19342. 1 | 94  | 0. 29367 | 11. 29364014 | 1  |
| MSTRG. 19347. 2 | 111 | 0. 28982 | 7. 479431152 | 1  |
| MSTRG. 19339. 2 | 233 | 0. 29772 | 9. 728210449 | 1  |
| MSTRG. 19339. 3 | 145 | 0. 29583 | 6. 73651123  | 1  |
| MSTRG. 19339. 4 | 109 | 0. 3139  | 9. 714782715 | 1  |
| MSTRG. 19339. 5 | 183 | 0. 29088 | 10. 24163818 | 1  |
| MSTRG. 19339. 6 | 183 | 0. 3064  | 10. 24163818 | 1  |
| MSTRG. 19339. 7 | 75  | 0. 36307 | 8. 479797363 | 1  |
| MSTRG. 19339. 8 | 110 | 0. 31027 | 10. 21661377 | 1  |
| MSTRG. 19349. 1 | 65  | 0. 31852 | 5. 075866699 | 1  |
| MSTRG. 19221. 1 | 101 | 0. 3182  | 8. 969055176 | 1  |
| MSTRG. 19221. 2 | 91  | 0. 40733 | 9. 390441895 | 1  |
| MSTRG. 19230. 1 | 61  | 0. 37187 | 7. 836608887 | 1  |
| MSTRG. 19235. 1 | 19  | 0. 39324 | 11. 01275635 | 1  |
| MSTRG. 19249. 1 | 105 | 0. 37635 | 6. 006408691 | 1  |
| MSTRG. 19249. 2 | 91  | 0. 34239 | 11. 83258057 | 1  |
| MSTRG. 19249. 3 | 80  | 0. 35701 | 10. 06292725 | 1  |
| MSTRG. 19249. 4 | 73  | 0. 29607 | 10. 81915283 | 1  |
| MSTRG. 19237. 1 | 314 | 0. 35238 | 4. 776794434 | 1  |
| MSTRG. 19252. 4 | 60  | 0. 34055 | 5. 552062988 | 1  |
| MSTRG. 19253. 1 | 89  | 0. 4527  | 11. 11590576 | 1  |
| MSTRG. 19253. 4 | 45  | 0. 42425 | 6. 214416504 | 1  |
| MSTRG. 19253. 5 | 45  | 0. 37135 | 6. 214416504 | 1  |
| MSTRG. 19254. 1 | 72  | 0. 32305 | 8. 598449707 | 1  |

|                  |      |          |              |   |
|------------------|------|----------|--------------|---|
| MSTRG. 19258. 1  | 188  | 0. 32783 | 10. 13641357 | 1 |
| MSTRG. 19258. 2  | 108  | 0. 36194 | 10. 6038208  | 1 |
| MSTRG. 19264. 1  | 215  | 0. 26913 | 9. 527526855 | 1 |
| MSTRG. 19265. 1  | 178  | 0. 41094 | 9. 349304199 | 1 |
| MSTRG. 19266. 2  | 495  | 0. 38247 | 8. 868103027 | 1 |
| MSTRG. 19270. 2  | 456  | 0. 45063 | 6. 464782715 | 1 |
| MSTRG. 19278. 1  | 77   | 0. 36805 | 9. 300354004 | 1 |
| MSTRG. 19281. 2  | 238  | 0. 38867 | 5. 196838379 | 1 |
| MSTRG. 19285. 2  | 141  | 0. 29615 | 9. 690856934 | 1 |
| MSTRG. 19285. 3  | 77   | 0. 31684 | 9. 520935059 | 1 |
| MSTRG. 19285. 4  | 142  | 0. 3152  | 9. 690856934 | 1 |
| MSTRG. 19291. 1  | 96   | 0. 27622 | 8. 293518066 | 1 |
| MSTRG. 19291. 2  | 84   | 0. 37322 | 10. 29205322 | 1 |
| MSTRG. 19283. 1  | 345  | 0. 42194 | 5. 422546387 | 1 |
| MSTRG. 19283. 3  | 345  | 0. 32971 | 5. 422546387 | 1 |
| MSTRG. 19305. 4  | 95   | 0. 31209 | 5. 635681152 | 1 |
| MSTRG. 19311. 1  | 738  | 0. 38703 | 7. 49798584  | 1 |
| MSTRG. 19311. 2  | 3505 | 0. 47369 | 6. 241149902 | 1 |
| MSTRG. 19311. 4  | 64   | 0. 37854 | 4. 593688965 | 1 |
| MSTRG. 19311. 5  | 2674 | 0. 48686 | 6. 805725098 | 1 |
| MSTRG. 19311. 6  | 1471 | 0. 48688 | 6. 092224121 | 1 |
| MSTRG. 19312. 1  | 29   | 0. 36215 | 11. 8348999  | 1 |
| MSTRG. 19314. 1  | 318  | 0. 4327  | 7. 832702637 | 1 |
| MSTRG. 19314. 3  | 157  | 0. 41142 | 9. 835388184 | 1 |
| MSTRG. 19314. 4  | 321  | 0. 40646 | 8. 53326416  | 1 |
| MSTRG. 19316. 1  | 591  | 0. 42293 | 5. 717712402 | 1 |
| MSTRG. 19314. 6  | 157  | 0. 38399 | 9. 835388184 | 1 |
| MSTRG. 19316. 2  | 591  | 0. 35972 | 5. 717712402 | 1 |
| MSTRG. 19316. 3  | 591  | 0. 41888 | 5. 717712402 | 1 |
| MSTRG. 19316. 4  | 591  | 0. 4029  | 5. 717712402 | 1 |
| MSTRG. 19317. 1  | 119  | 0. 38387 | 9. 88482666  | 1 |
| MSTRG. 19313. 1  | 599  | 0. 36573 | 6. 105285645 | 1 |
| MSTRG. 19352. 1  | 487  | 0. 35673 | 4. 891174316 | 1 |
| MSTRG. 19352. 3  | 418  | 0. 36875 | 5. 033996582 | 1 |
| MSTRG. 19352. 4  | 301  | 0. 38587 | 4. 525939941 | 1 |
| MSTRG. 19352. 5  | 285  | 0. 36141 | 4. 422790527 | 1 |
| MSTRG. 19352. 12 | 175  | 0. 35645 | 3. 984924316 | 1 |
| MSTRG. 19352. 10 | 135  | 0. 28662 | 9. 775817871 | 1 |
| MSTRG. 19352. 13 | 283  | 0. 47101 | 4. 37286377  | 1 |
| MSTRG. 19352. 9  | 303  | 0. 47198 | 4. 525939941 | 1 |
| MSTRG. 19352. 8  | 299  | 0. 36385 | 4. 473693848 | 1 |
| MSTRG. 19352. 11 | 271  | 0. 32149 | 4. 660461426 | 1 |
| MSTRG. 19352. 6  | 505  | 0. 44791 | 5. 065002441 | 1 |
| MSTRG. 19354. 1  | 162  | 0. 36432 | 10. 24957275 | 1 |
| MSTRG. 19359. 2  | 160  | 0. 44025 | 5. 719909668 | 1 |
| MSTRG. 19359. 3  | 121  | 0. 31204 | 10. 68890381 | 1 |
| MSTRG. 19359. 4  | 145  | 0. 36597 | 4. 766540527 | 1 |
| MSTRG. 19359. 5  | 96   | 0. 455   | 4. 593566895 | 1 |
| MSTRG. 19361. 1  | 549  | 0. 34139 | 7. 172790527 | 1 |
| MSTRG. 19361. 2  | 748  | 0. 40816 | 9. 028869629 | 1 |
| MSTRG. 19361. 3  | 170  | 0. 34683 | 10. 52044678 | 1 |
| MSTRG. 19361. 4  | 549  | 0. 38811 | 7. 172790527 | 1 |
| MSTRG. 19361. 5  | 596  | 0. 30653 | 8. 113098145 | 1 |
| MSTRG. 19361. 6  | 596  | 0. 28467 | 8. 113098145 | 1 |

|                  |      |          |              |    |
|------------------|------|----------|--------------|----|
| MSTRG. 19361. 10 | 138  | 0. 3545  | 6. 581237793 | 1  |
| MSTRG. 19361. 7  | 350  | 0. 39489 | 9. 206604004 | 1  |
| MSTRG. 19361. 8  | 350  | 0. 42488 | 9. 206604004 | 1  |
| MSTRG. 19361. 9  | 549  | 0. 40233 | 7. 172790527 | 1  |
| MSTRG. 19361. 11 | 199  | 0. 27959 | 10. 64349365 | 1  |
| MSTRG. 19361. 12 | 106  | 0. 27643 | 10. 01202393 | 1  |
| MSTRG. 19361. 13 | 84   | 0. 28048 | 10. 90643311 | 1  |
| MSTRG. 19361. 14 | 73   | 0. 28852 | 4. 917663574 | 1  |
| MSTRG. 19363. 1  | 33   | 0. 44428 | 9. 873474121 | 1  |
| MSTRG. 19401. 1  | 129  | 0. 30684 | 9. 563537598 | 1  |
| MSTRG. 19402. 1  | 16   | 0. 37703 | 9. 500061035 | 1  |
| MSTRG. 19368. 1  | 7    | 0. 40051 | 5. 752990723 | 1  |
| MSTRG. 19369. 1  | 37   | 0. 3621  | 10. 25616455 | 1  |
| MSTRG. 19370. 1  | 65   | 0. 40259 | 6. 337219238 | 1  |
| MSTRG. 19407. 1  | 62   | 0. 33599 | 5. 973571777 | 1  |
| MSTRG. 19408. 1  | 181  | 0. 3683  | 9. 018493652 | 1  |
| MSTRG. 19414. 1  | 571  | 0. 4159  | 7. 971252441 | 1  |
| MSTRG. 19414. 2  | 643  | 0. 41624 | 7. 019958496 | 1  |
| MSTRG. 19415. 1  | 350  | 0. 41828 | 9. 516296387 | 1  |
| MSTRG. 19415. 3  | 498  | 0. 46401 | 9. 257019043 | 1  |
| MSTRG. 19415. 4  | 349  | 0. 47274 | 9. 482727051 | 1  |
| MSTRG. 19416. 1  | 95   | 0. 35953 | 10. 65985107 | 1  |
| MSTRG. 19416. 2  | 95   | 0. 35808 | 10. 65985107 | 1  |
| MSTRG. 19413. 1  | 159  | 0. 35915 | 10. 35247803 | 1  |
| MSTRG. 19420. 2  | 492  | 0. 28982 | 5. 941345215 | 1  |
| MSTRG. 19422. 1  | 296  | 0. 47402 | 6. 37286377  | -1 |
| MSTRG. 19422. 3  | 500  | 0. 33046 | 8. 925964355 | 1  |
| MSTRG. 19422. 2  | 428  | 0. 38733 | 8. 724060059 | 1  |
| MSTRG. 19422. 4  | 427  | 0. 41512 | 8. 953308105 | 1  |
| MSTRG. 19422. 5  | 428  | 0. 41394 | 8. 827697754 | 1  |
| MSTRG. 19423. 1  | 119  | 0. 26749 | 6. 346862793 | 1  |
| MSTRG. 19425. 1  | 873  | 0. 47402 | 6. 710266113 | 1  |
| MSTRG. 19425. 4  | 873  | 0. 39433 | 6. 710266113 | 1  |
| MSTRG. 19428. 1  | 772  | 0. 48136 | 9. 025085449 | 1  |
| MSTRG. 19432. 1  | 84   | 0. 35293 | 6. 289855957 | 1  |
| MSTRG. 19434. 1  | 885  | 0. 45448 | 8. 523986816 | 1  |
| MSTRG. 19435. 1  | 138  | 0. 33671 | 10. 50213623 | 1  |
| MSTRG. 19436. 1  | 49   | 0. 28301 | 5. 013122559 | 1  |
| MSTRG. 19440. 2  | 98   | 0. 35972 | 9. 942565918 | 1  |
| MSTRG. 19440. 1  | 24   | 0. 36033 | 4. 529602051 | 1  |
| MSTRG. 19441. 1  | 108  | 0. 43927 | 7. 834899902 | -1 |
| MSTRG. 19446. 2  | 519  | 0. 36416 | 8. 045471191 | 1  |
| MSTRG. 19464. 1  | 3049 | 0. 47527 | 6. 434753418 | 1  |
| MSTRG. 19464. 6  | 123  | 0. 32659 | 7. 054016113 | 1  |
| MSTRG. 19478. 2  | 407  | 0. 38722 | 6. 198791504 | 1  |
| MSTRG. 19479. 1  | 63   | 0. 33798 | 10. 21099854 | 1  |
| MSTRG. 19448. 1  | 98   | 0. 34336 | 10. 10137939 | 1  |
| MSTRG. 19458. 2  | 98   | 0. 38765 | 9. 693786621 | 1  |
| MSTRG. 19458. 4  | 98   | 0. 38537 | 9. 693786621 | 1  |
| MSTRG. 19458. 3  | 58   | 0. 42582 | 5. 361999512 | 1  |
| MSTRG. 19458. 5  | 852  | 0. 33105 | 6. 550109863 | 1  |
| MSTRG. 19459. 1  | 64   | 0. 25541 | 9. 148742676 | 1  |
| MSTRG. 19481. 1  | 115  | 0. 28165 | 5. 60736084  | 1  |
| MSTRG. 19480. 2  | 278  | 0. 3     | 7. 692687988 | 1  |

|                 |      |          |              |   |
|-----------------|------|----------|--------------|---|
| MSTRG. 19485. 1 | 86   | 0. 3208  | 9. 25604248  | 1 |
| MSTRG. 19485. 2 | 186  | 0. 34952 | 5. 436950684 | 1 |
| MSTRG. 19485. 3 | 145  | 0. 46729 | 5. 575500488 | 1 |
| MSTRG. 19486. 1 | 87   | 0. 27517 | 9. 22052002  | 1 |
| MSTRG. 19490. 5 | 1324 | 0. 36594 | 9. 196960449 | 1 |
| MSTRG. 19490. 8 | 423  | 0. 43977 | 9. 110900879 | 1 |
| MSTRG. 19491. 1 | 70   | 0. 3091  | 5. 079406738 | 1 |
| MSTRG. 19492. 1 | 192  | 0. 28683 | 8. 569885254 | 1 |
| MSTRG. 19493. 1 | 129  | 0. 32249 | 6. 221008301 | 1 |
| MSTRG. 19494. 1 | 73   | 0. 35862 | 9. 992736816 | 1 |
| MSTRG. 19495. 1 | 155  | 0. 27502 | 8. 06854248  | 1 |
| MSTRG. 19496. 1 | 92   | 0. 34547 | 11. 04058838 | 1 |
| MSTRG. 19505. 2 | 229  | 0. 33202 | 9. 133483887 | 1 |
| MSTRG. 19505. 3 | 229  | 0. 4134  | 9. 133483887 | 1 |
| MSTRG. 19505. 4 | 229  | 0. 33558 | 9. 133483887 | 1 |
| MSTRG. 19506. 1 | 84   | 0. 35292 | 6. 740783691 | 1 |
| MSTRG. 19507. 4 | 168  | 0. 38627 | 9. 077087402 | 1 |
| MSTRG. 19508. 3 | 112  | 0. 44192 | 9. 395812988 | 1 |
| MSTRG. 19509. 2 | 658  | 0. 44128 | 5. 058898926 | 1 |
| MSTRG. 19515. 3 | 124  | 0. 31593 | 8. 913513184 | 1 |
| MSTRG. 19515. 2 | 180  | 0. 27433 | 6. 971740723 | 1 |
| MSTRG. 19515. 4 | 167  | 0. 3346  | 6. 48248291  | 1 |
| MSTRG. 19521. 1 | 335  | 0. 44282 | 5. 327087402 | 1 |
| MSTRG. 19521. 2 | 185  | 0. 43383 | 5. 140441895 | 1 |
| MSTRG. 19522. 4 | 262  | 0. 34947 | 9. 665710449 | 1 |
| MSTRG. 19526. 1 | 50   | 0. 41161 | 6. 54486084  | 1 |
| MSTRG. 19530. 1 | 91   | 0. 35339 | 4. 856018066 | 1 |
| MSTRG. 19531. 1 | 158  | 0. 34201 | 10. 33135986 | 1 |
| MSTRG. 19526. 2 | 177  | 0. 28535 | 8. 859802246 | 1 |
| MSTRG. 19532. 1 | 32   | 0. 34936 | 6. 137023926 | 1 |
| MSTRG. 19516. 1 | 71   | 0. 31437 | 10. 15435791 | 1 |
| MSTRG. 19533. 5 | 134  | 0. 29526 | 7. 616149902 | 1 |
| MSTRG. 19533. 6 | 35   | 0. 40893 | 9. 496398926 | 1 |
| MSTRG. 19534. 1 | 131  | 0. 27639 | 8. 772521973 | 1 |
| MSTRG. 19533. 7 | 993  | 0. 47757 | 4. 750427246 | 1 |
| MSTRG. 19535. 1 | 78   | 0. 31401 | 4. 437316895 | 1 |
| MSTRG. 19538. 1 | 79   | 0. 35573 | 7. 998718262 | 1 |
| MSTRG. 19540. 1 | 126  | 0. 30813 | 9. 332702637 | 1 |
| MSTRG. 19543. 4 | 837  | 0. 43856 | 5. 046203613 | 1 |
| MSTRG. 19543. 5 | 807  | 0. 43772 | 4. 968200684 | 1 |
| MSTRG. 19543. 6 | 949  | 0. 46803 | 5. 159118652 | 1 |
| MSTRG. 19544. 1 | 43   | 0. 33959 | 7. 73236084  | 1 |
| MSTRG. 19547. 1 | 219  | 0. 28786 | 7. 678649902 | 1 |
| MSTRG. 19551. 2 | 188  | 0. 37132 | 6. 09576416  | 1 |
| MSTRG. 19555. 1 | 535  | 0. 45023 | 9. 265197754 | 1 |
| MSTRG. 19559. 7 | 278  | 0. 43427 | 4. 945373535 | 1 |
| MSTRG. 19559. 8 | 294  | 0. 43427 | 4. 934997559 | 1 |
| MSTRG. 19559. 5 | 305  | 0. 42495 | 4. 891418457 | 1 |
| MSTRG. 19559. 6 | 267  | 0. 43427 | 4. 995544434 | 1 |
| MSTRG. 19560. 1 | 125  | 0. 28982 | 9. 146789551 | 1 |
| MSTRG. 19561. 1 | 97   | 0. 2921  | 9. 495910645 | 1 |
| MSTRG. 19562. 2 | 183  | 0. 27042 | 10. 57025146 | 1 |
| MSTRG. 19562. 1 | 72   | 0. 32305 | 9. 663269043 | 1 |
| MSTRG. 19562. 4 | 183  | 0. 28302 | 10. 57025146 | 1 |

|                  |      |          |              |    |
|------------------|------|----------|--------------|----|
| MSTRG. 19562. 5  | 183  | 0. 28302 | 10. 39398193 | 1  |
| MSTRG. 19562. 3  | 183  | 0. 28302 | 10. 39398193 | 1  |
| MSTRG. 19562. 6  | 183  | 0. 27042 | 10. 57025146 | 1  |
| MSTRG. 19559. 9  | 77   | 0. 28165 | 9. 212585449 | 1  |
| MSTRG. 19563. 1  | 153  | 0. 29152 | 8. 849182129 | 1  |
| MSTRG. 19568. 1  | 382  | 0. 46015 | 5. 736633301 | -1 |
| MSTRG. 19568. 2  | 240  | 0. 45001 | 5. 398132324 | -1 |
| MSTRG. 19568. 3  | 250  | 0. 41636 | 5. 879699707 | -1 |
| MSTRG. 19568. 4  | 215  | 0. 46457 | 5. 282165527 | -1 |
| MSTRG. 19572. 9  | 777  | 0. 47576 | 6. 908996582 | 1  |
| MSTRG. 19572. 8  | 777  | 0. 49323 | 6. 908996582 | 1  |
| MSTRG. 19572. 5  | 1246 | 0. 50317 | 6. 315246582 | 1  |
| MSTRG. 19572. 7  | 1246 | 0. 47888 | 6. 315246582 | 1  |
| MSTRG. 19572. 6  | 697  | 0. 42725 | 9. 185241699 | 1  |
| MSTRG. 19573. 1  | 92   | 0. 28805 | 8. 29119873  | 1  |
| MSTRG. 19572. 10 | 84   | 0. 30807 | 6. 00982666  | 1  |
| MSTRG. 19572. 11 | 113  | 0. 28248 | 6. 852111816 | 1  |
| MSTRG. 19574. 1  | 84   | 0. 28306 | 11. 39508057 | 1  |
| MSTRG. 19572. 12 | 116  | 0. 28478 | 9. 077697754 | 1  |
| MSTRG. 19570. 2  | 181  | 0. 41714 | 6. 376037598 | 1  |
| MSTRG. 19570. 3  | 229  | 0. 28584 | 5. 568664551 | 1  |
| MSTRG. 19570. 4  | 229  | 0. 35108 | 5. 568664551 | 1  |
| MSTRG. 19571. 2  | 797  | 0. 45059 | 6. 702087402 | 1  |
| MSTRG. 19577. 2  | 194  | 0. 42188 | 8. 882751465 | 1  |
| MSTRG. 19579. 1  | 501  | 0. 42891 | 5. 312683105 | 1  |
| MSTRG. 19579. 2  | 267  | 0. 43657 | 5. 152038574 | 1  |
| MSTRG. 19582. 2  | 1431 | 0. 42756 | 5. 083190918 | 1  |
| MSTRG. 19582. 4  | 1477 | 0. 42294 | 5. 066467285 | 1  |
| MSTRG. 19582. 5  | 1447 | 0. 42294 | 5. 109436035 | 1  |
| MSTRG. 19582. 6  | 1388 | 0. 44132 | 5. 229675293 | 1  |
| MSTRG. 19582. 3  | 1474 | 0. 42756 | 5. 074768066 | 1  |
| MSTRG. 19582. 7  | 1428 | 0. 4137  | 5. 09197998  | 1  |
| MSTRG. 19581. 1  | 45   | 0. 37687 | 6. 798034668 | 1  |
| MSTRG. 19583. 1  | 460  | 0. 38761 | 8. 191101074 | 1  |
| MSTRG. 19590. 1  | 241  | 0. 4075  | 8. 308410645 | 1  |
| MSTRG. 19590. 2  | 33   | 0. 40854 | 8. 496398926 | 1  |
| MSTRG. 19591. 1  | 97   | 0. 4031  | 11. 80072021 | 1  |
| MSTRG. 19591. 2  | 97   | 0. 35695 | 11. 80072021 | 1  |
| MSTRG. 19593. 1  | 192  | 0. 37258 | 7. 554626465 | 1  |
| MSTRG. 19596. 4  | 1040 | 0. 46995 | 5. 203918457 | 1  |
| MSTRG. 19598. 3  | 3998 | 0. 41403 | 9. 232849121 | 1  |
| MSTRG. 19598. 5  | 3710 | 0. 43447 | 9. 086364746 | 1  |
| MSTRG. 19598. 6  | 2381 | 0. 40306 | 6. 273376465 | 1  |
| MSTRG. 19600. 1  | 301  | 0. 40411 | 4. 369445801 | 1  |
| MSTRG. 19602. 1  | 1322 | 0. 45241 | 9. 06072998  | 1  |
| MSTRG. 19603. 1  | 122  | 0. 41595 | 8. 683044434 | 1  |
| MSTRG. 19602. 3  | 1285 | 0. 45408 | 8. 981872559 | 1  |
| MSTRG. 19602. 4  | 1202 | 0. 44435 | 9. 119567871 | 1  |
| MSTRG. 19602. 5  | 758  | 0. 3202  | 8. 777160645 | 1  |
| MSTRG. 19602. 6  | 446  | 0. 47141 | 9. 137878418 | 1  |
| MSTRG. 19604. 6  | 483  | 0. 3582  | 8. 850280762 | 1  |
| MSTRG. 19604. 4  | 483  | 0. 3582  | 8. 850280762 | 1  |
| MSTRG. 19604. 8  | 483  | 0. 3351  | 8. 850280762 | 1  |
| MSTRG. 19622. 1  | 105  | 0. 35504 | 8. 768859863 | 1  |

|                 |      |          |              |    |
|-----------------|------|----------|--------------|----|
| MSTRG. 19624. 7 | 1001 | 0. 4761  | 5. 264831543 | 1  |
| MSTRG. 19624. 9 | 1002 | 0. 4761  | 5. 264831543 | 1  |
| MSTRG. 19616. 2 | 754  | 0. 27674 | 5. 338317871 | 1  |
| MSTRG. 19614. 1 | 637  | 0. 45522 | 5. 82635498  | 1  |
| MSTRG. 19614. 2 | 595  | 0. 44573 | 5. 840515137 | 1  |
| MSTRG. 19629. 1 | 606  | 0. 33569 | 9. 367980957 | 1  |
| MSTRG. 19628. 1 | 20   | 0. 38255 | 9. 34967041  | 1  |
| MSTRG. 19628. 2 | 76   | 0. 35221 | 8. 302307129 | 1  |
| MSTRG. 19638. 4 | 1525 | 0. 4515  | 5. 458557129 | 1  |
| MSTRG. 19638. 2 | 1544 | 0. 45512 | 5. 464294434 | 1  |
| MSTRG. 19638. 1 | 1525 | 0. 44601 | 5. 458557129 | 1  |
| MSTRG. 19639. 1 | 98   | 0. 33906 | 10. 0446167  | 1  |
| MSTRG. 19640. 1 | 189  | 0. 32905 | 10. 96246338 | 1  |
| MSTRG. 19642. 5 | 227  | 0. 33125 | 5. 360534668 | 1  |
| MSTRG. 19642. 6 | 274  | 0. 33125 | 5. 20526123  | 1  |
| MSTRG. 19642. 7 | 274  | 0. 35175 | 5. 20526123  | 1  |
| MSTRG. 19643. 1 | 1490 | 0. 3632  | 5. 205505371 | 1  |
| MSTRG. 19648. 1 | 516  | 0. 34707 | 5. 592712402 | 1  |
| MSTRG. 19649. 3 | 364  | 0. 38884 | 9. 647888184 | 1  |
| MSTRG. 19650. 1 | 68   | 0. 37325 | 9. 817565918 | -1 |
| MSTRG. 19671. 9 | 576  | 0. 43128 | 5. 243469238 | 1  |
| MSTRG. 19666. 1 | 424  | 0. 33725 | 6. 867858887 | 1  |
| MSTRG. 19672. 2 | 288  | 0. 43012 | 6. 125305176 | 1  |
| MSTRG. 19672. 3 | 109  | 0. 39892 | 10. 25506592 | -1 |
| MSTRG. 19672. 4 | 109  | 0. 39892 | 10. 25506592 | -1 |
| MSTRG. 19674. 1 | 331  | 0. 42791 | 8. 960632324 | 1  |
| MSTRG. 19675. 1 | 415  | 0. 46535 | 5. 120788574 | 1  |
| MSTRG. 19676. 2 | 471  | 0. 43668 | 5. 928527832 | 1  |
| MSTRG. 19678. 5 | 1221 | 0. 45678 | 9. 190368652 | 1  |
| MSTRG. 19678. 8 | 408  | 0. 41905 | 6. 704528809 | 1  |
| MSTRG. 19681. 1 | 104  | 0. 29594 | 9. 098327637 | 1  |
| MSTRG. 19682. 1 | 83   | 0. 37438 | 8. 041931152 | 1  |
| MSTRG. 19683. 1 | 196  | 0. 4777  | 9. 265075684 | -1 |
| MSTRG. 19684. 1 | 797  | 0. 46357 | 7. 973571777 | 1  |
| MSTRG. 19684. 2 | 797  | 0. 4614  | 7. 973571777 | 1  |
| MSTRG. 19701. 1 | 45   | 0. 4376  | 5. 60760498  | 1  |
| MSTRG. 19707. 2 | 441  | 0. 44019 | 4. 630065918 | 1  |
| MSTRG. 19708. 1 | 121  | 0. 39818 | 10. 42852783 | 1  |
| MSTRG. 19707. 3 | 104  | 0. 27988 | 6. 707946777 | 1  |
| MSTRG. 19713. 2 | 238  | 0. 4807  | 6. 248718262 | 1  |
| MSTRG. 19718. 1 | 65   | 0. 36152 | 5. 464050293 | 1  |
| MSTRG. 19720. 3 | 127  | 0. 30303 | 8. 462585449 | 1  |
| MSTRG. 19721. 1 | 92   | 0. 28529 | 8. 633361816 | 1  |
| MSTRG. 19720. 4 | 127  | 0. 30221 | 8. 462585449 | 1  |
| MSTRG. 19720. 5 | 93   | 0. 29883 | 8. 084411621 | 1  |
| MSTRG. 19722. 1 | 807  | 0. 41449 | 5. 778625488 | 1  |
| MSTRG. 19723. 1 | 503  | 0. 33863 | 9. 166931152 | 1  |
| MSTRG. 19723. 4 | 139  | 0. 28385 | 9. 823547363 | 1  |
| MSTRG. 19723. 3 | 515  | 0. 42437 | 9. 31439209  | 1  |
| MSTRG. 19723. 5 | 338  | 0. 43415 | 6. 920593262 | 1  |
| MSTRG. 19723. 6 | 338  | 0. 42664 | 6. 920593262 | 1  |
| MSTRG. 19733. 1 | 712  | 0. 40329 | 8. 871032715 | 1  |
| MSTRG. 19743. 1 | 23   | 0. 3726  | 10. 69390869 | 1  |
| MSTRG. 19744. 2 | 59   | 0. 37002 | 11. 45855713 | 1  |



|                  |      |          |              |    |
|------------------|------|----------|--------------|----|
| MSTRG. 19744. 4  | 45   | 0. 39295 | 8. 255065918 | 1  |
| MSTRG. 19744. 5  | 107  | 0. 32969 | 6. 255554199 | 1  |
| MSTRG. 19744. 6  | 42   | 0. 30268 | 7. 769226074 | 1  |
| MSTRG. 19744. 7  | 37   | 0. 38801 | 9. 29888916  | -1 |
| MSTRG. 19744. 8  | 133  | 0. 35288 | 10. 105896   | 1  |
| MSTRG. 19744. 9  | 133  | 0. 35108 | 10. 105896   | 1  |
| MSTRG. 19744. 10 | 144  | 0. 39442 | 10. 10137939 | 1  |
| MSTRG. 19744. 11 | 34   | 0. 41712 | 11. 00006104 | 1  |
| MSTRG. 19744. 12 | 50   | 0. 37344 | 6. 705993652 | -1 |
| MSTRG. 19744. 13 | 33   | 0. 4204  | 9. 968933105 | 1  |
| MSTRG. 19744. 14 | 37   | 0. 43432 | 9. 890808105 | 1  |
| MSTRG. 19744. 15 | 70   | 0. 35191 | 10. 98345947 | 1  |
| MSTRG. 19744. 16 | 29   | 0. 33755 | 10. 66668701 | -1 |
| MSTRG. 19744. 17 | 32   | 0. 33417 | 8. 88482666  | -1 |
| MSTRG. 19744. 18 | 29   | 0. 40137 | 9. 968933105 | -1 |
| MSTRG. 19744. 19 | 28   | 0. 35491 | 9. 300231934 | -1 |
| MSTRG. 19744. 20 | 60   | 0. 32134 | 7. 812561035 | -1 |
| MSTRG. 19744. 21 | 30   | 0. 34765 | 9. 300598145 | -1 |
| MSTRG. 19744. 22 | 31   | 0. 36623 | 10. 66668701 | -1 |
| MSTRG. 19744. 23 | 37   | 0. 38645 | 10. 66668701 | -1 |
| MSTRG. 19744. 24 | 32   | 0. 35319 | 9. 300598145 | -1 |
| MSTRG. 19744. 25 | 32   | 0. 38459 | 8. 492858887 | -1 |
| MSTRG. 19744. 26 | 18   | 0. 37092 | 11. 53900146 | 1  |
| MSTRG. 19744. 27 | 19   | 0. 3863  | 9. 976501465 | 1  |
| MSTRG. 19744. 28 | 30   | 0. 44986 | 8. 211242676 | -1 |
| MSTRG. 19744. 29 | 28   | 0. 4132  | 9. 690734863 | -1 |
| MSTRG. 19744. 30 | 27   | 0. 36664 | 9. 522888184 | -1 |
| MSTRG. 19744. 31 | 26   | 0. 36727 | 9. 778991699 | -1 |
| MSTRG. 19744. 32 | 25   | 0. 38987 | 9. 489196777 | -1 |
| MSTRG. 19739. 1  | 89   | 0. 43314 | 9. 827941895 | -1 |
| MSTRG. 19751. 1  | 129  | 0. 27794 | 10. 65106201 | 1  |
| MSTRG. 19752. 1  | 108  | 0. 31421 | 5. 264709473 | 1  |
| MSTRG. 19752. 2  | 92   | 0. 35626 | 5. 966369629 | 1  |
| MSTRG. 19751. 2  | 117  | 0. 42206 | 5. 565246582 | 1  |
| MSTRG. 19751. 3  | 53   | 0. 33303 | 11. 32867432 | 1  |
| MSTRG. 19755. 1  | 701  | 0. 43785 | 6. 294128418 | 1  |
| MSTRG. 19755. 2  | 701  | 0. 46267 | 6. 294128418 | 1  |
| MSTRG. 19755. 3  | 701  | 0. 44441 | 6. 294128418 | 1  |
| MSTRG. 19755. 4  | 663  | 0. 45597 | 6. 168273926 | 1  |
| MSTRG. 19755. 5  | 663  | 0. 44934 | 6. 168273926 | 1  |
| MSTRG. 19761. 1  | 85   | 0. 31177 | 9. 303649902 | 1  |
| MSTRG. 19765. 1  | 146  | 0. 35819 | 10. 40228271 | 1  |
| MSTRG. 19766. 1  | 105  | 0. 29072 | 9. 023986816 | 1  |
| MSTRG. 19767. 3  | 315  | 0. 47294 | 9. 509338379 | 1  |
| MSTRG. 19768. 1  | 201  | 0. 27794 | 9. 971374512 | 1  |
| MSTRG. 19757. 2  | 185  | 0. 42718 | 5. 230041504 | 1  |
| MSTRG. 19774. 1  | 1038 | 0. 47766 | 4. 699279785 | 1  |
| MSTRG. 19779. 2  | 141  | 0. 30415 | 9. 388000488 | 1  |
| MSTRG. 19784. 2  | 333  | 0. 42603 | 8. 26348877  | 1  |
| MSTRG. 19785. 3  | 61   | 0. 41079 | 4. 999450684 | 1  |
| MSTRG. 19788. 1  | 137  | 0. 28698 | 6. 129211426 | 1  |
| MSTRG. 19791. 1  | 115  | 0. 31883 | 6. 570495605 | -1 |
| MSTRG. 19803. 2  | 860  | 0. 40401 | 6. 083435059 | 1  |
| MSTRG. 19803. 6  | 702  | 0. 45441 | 8. 070983887 | 1  |

|                  |      |          |              |    |
|------------------|------|----------|--------------|----|
| MSTRG. 19803. 7  | 783  | 0. 46071 | 6. 610900879 | 1  |
| MSTRG. 19803. 5  | 860  | 0. 45598 | 6. 083435059 | 1  |
| MSTRG. 19804. 1  | 63   | 0. 38874 | 9. 099060059 | -1 |
| MSTRG. 19805. 1  | 285  | 0. 30534 | 8. 938537598 | 1  |
| MSTRG. 19806. 1  | 96   | 0. 37867 | 10. 2901001  | 1  |
| MSTRG. 19807. 3  | 352  | 0. 45139 | 8. 547668457 | -1 |
| MSTRG. 19809. 1  | 30   | 0. 42025 | 5. 971618652 | -1 |
| MSTRG. 19811. 1  | 114  | 0. 43463 | 8. 487487793 | 1  |
| MSTRG. 19821. 1  | 288  | 0. 4487  | 8. 829406738 | -1 |
| MSTRG. 19822. 1  | 46   | 0. 40193 | 10. 0602417  | 1  |
| MSTRG. 19821. 2  | 62   | 0. 43835 | 4. 164733887 | 1  |
| MSTRG. 19821. 3  | 77   | 0. 32646 | 6. 791809082 | 1  |
| MSTRG. 19821. 4  | 62   | 0. 31561 | 4. 164733887 | 1  |
| MSTRG. 19821. 5  | 141  | 0. 2895  | 4. 583068848 | 1  |
| MSTRG. 19821. 7  | 141  | 0. 2895  | 4. 583068848 | 1  |
| MSTRG. 19821. 6  | 141  | 0. 30475 | 4. 583068848 | 1  |
| MSTRG. 19821. 8  | 62   | 0. 36377 | 4. 164733887 | 1  |
| MSTRG. 19821. 9  | 67   | 0. 31003 | 4. 787658691 | 1  |
| MSTRG. 19825. 1  | 262  | 0. 44643 | 6. 502502441 | 1  |
| MSTRG. 19827. 1  | 121  | 0. 41188 | 9. 660827637 | 1  |
| MSTRG. 19831. 2  | 100  | 0. 29607 | 9. 885314941 | 1  |
| MSTRG. 19840. 1  | 68   | 0. 34229 | 9. 415466309 | 1  |
| MSTRG. 19841. 1  | 2984 | 0. 44704 | 6. 254333496 | 1  |
| MSTRG. 19848. 2  | 388  | 0. 3802  | 10. 02923584 | 1  |
| MSTRG. 19856. 8  | 656  | 0. 46562 | 8. 493103027 | -1 |
| MSTRG. 19856. 9  | 656  | 0. 46562 | 8. 493103027 | -1 |
| MSTRG. 19856. 11 | 673  | 0. 31416 | 6. 779968262 | 1  |
| MSTRG. 19857. 2  | 329  | 0. 43672 | 9. 982727051 | -1 |
| MSTRG. 19861. 2  | 498  | 0. 4364  | 6. 062316895 | 1  |
| MSTRG. 19863. 3  | 478  | 0. 44347 | 7. 259094238 | 1  |
| MSTRG. 19863. 2  | 487  | 0. 43651 | 6. 832824707 | 1  |
| MSTRG. 19863. 4  | 487  | 0. 4087  | 6. 832824707 | 1  |
| MSTRG. 19868. 1  | 79   | 0. 43787 | 8. 656799316 | 1  |
| MSTRG. 19868. 2  | 164  | 0. 44919 | 7. 159240723 | 1  |
| MSTRG. 19879. 1  | 27   | 0. 30561 | 10. 7366333  | 1  |
| MSTRG. 19884. 1  | 88   | 0. 29595 | 9. 237243652 | 1  |
| MSTRG. 19884. 2  | 37   | 0. 41247 | 9. 301696777 | 1  |
| MSTRG. 19884. 3  | 68   | 0. 30564 | 9. 880310059 | 1  |
| MSTRG. 19884. 4  | 60   | 0. 30289 | 9. 680847168 | 1  |
| MSTRG. 19885. 1  | 161  | 0. 41602 | 9. 546081543 | 1  |
| MSTRG. 19888. 1  | 42   | 0. 3484  | 9. 492736816 | 1  |
| MSTRG. 19893. 3  | 485  | 0. 38993 | 6. 211730957 | 1  |
| MSTRG. 19906. 4  | 751  | 0. 44791 | 6. 149230957 | 1  |
| MSTRG. 19907. 1  | 42   | 0. 29428 | 8. 858703613 | 1  |
| MSTRG. 19908. 2  | 191  | 0. 42366 | 8. 40826416  | 1  |
| MSTRG. 19909. 5  | 255  | 0. 39793 | 7. 609436035 | 1  |
| MSTRG. 19909. 7  | 251  | 0. 36219 | 8. 101623535 | 1  |
| MSTRG. 19909. 6  | 250  | 0. 39903 | 8. 66973877  | 1  |
| MSTRG. 19904. 1  | 298  | 0. 33469 | 6. 390075684 | 1  |
| MSTRG. 19904. 2  | 309  | 0. 29635 | 6. 657775879 | 1  |
| MSTRG. 19904. 3  | 200  | 0. 35788 | 5. 203063965 | 1  |
| MSTRG. 19905. 1  | 432  | 0. 46904 | 6. 125183105 | 1  |
| MSTRG. 19905. 2  | 147  | 0. 38924 | 8. 967712402 | 1  |
| MSTRG. 19917. 1  | 405  | 0. 34071 | 8. 25604248  | 1  |

|                  |      |          |              |    |
|------------------|------|----------|--------------|----|
| MSTRG. 19918. 3  | 327  | 0. 29527 | 6. 599182129 | 1  |
| MSTRG. 19912. 3  | 121  | 0. 42985 | 3. 468933105 | 1  |
| MSTRG. 19912. 4  | 150  | 0. 42943 | 3. 667297363 | 1  |
| MSTRG. 19913. 2  | 258  | 0. 34503 | 6. 539367676 | 1  |
| MSTRG. 19914. 2  | 1264 | 0. 46564 | 6. 088928223 | 1  |
| MSTRG. 19923. 1  | 26   | 0. 39425 | 6. 50982666  | -1 |
| MSTRG. 19924. 1  | 98   | 0. 31878 | 8. 933288574 | -1 |
| MSTRG. 19924. 2  | 53   | 0. 36769 | 10. 83428955 | 1  |
| MSTRG. 19925. 3  | 1444 | 0. 47031 | 5. 88470459  | 1  |
| MSTRG. 19925. 5  | 727  | 0. 44683 | 6. 063415527 | 1  |
| MSTRG. 19926. 5  | 160  | 0. 30226 | 5. 627746582 | 1  |
| MSTRG. 19926. 4  | 291  | 0. 46936 | 6. 664855957 | 1  |
| MSTRG. 19926. 3  | 362  | 0. 38205 | 9. 075622559 | 1  |
| MSTRG. 19930. 1  | 101  | 0. 30235 | 9. 555847168 | 1  |
| MSTRG. 19931. 1  | 18   | 0. 29764 | 12. 00848389 | 1  |
| MSTRG. 19937. 1  | 125  | 0. 37334 | 9. 454528809 | 1  |
| MSTRG. 19938. 1  | 79   | 0. 32995 | 10. 46636963 | 1  |
| MSTRG. 19939. 4  | 100  | 0. 32255 | 6. 026794434 | 1  |
| MSTRG. 19941. 1  | 113  | 0. 46782 | 5. 157287598 | 1  |
| MSTRG. 19951. 1  | 84   | 0. 3901  | 6. 405456543 | 1  |
| MSTRG. 19954. 2  | 325  | 0. 45553 | 9. 065734863 | 1  |
| MSTRG. 19958. 1  | 135  | 0. 31982 | 6. 900085449 | 1  |
| MSTRG. 19959. 1  | 2345 | 0. 44745 | 6. 655700684 | 1  |
| MSTRG. 19959. 3  | 2345 | 0. 45954 | 6. 655700684 | 1  |
| MSTRG. 19959. 5  | 2368 | 0. 45954 | 6. 624938965 | 1  |
| MSTRG. 19959. 2  | 2349 | 0. 46774 | 6. 422302246 | 1  |
| MSTRG. 19959. 8  | 1422 | 0. 4022  | 8. 043518066 | 1  |
| MSTRG. 19959. 9  | 1223 | 0. 39549 | 6. 304382324 | 1  |
| MSTRG. 19959. 10 | 1426 | 0. 40301 | 6. 99395752  | 1  |
| MSTRG. 19959. 11 | 1962 | 0. 44745 | 6. 786682129 | 1  |
| MSTRG. 19959. 12 | 1557 | 0. 42351 | 5. 921813965 | 1  |
| MSTRG. 19959. 13 | 1741 | 0. 45006 | 7. 308654785 | 1  |
| MSTRG. 19942. 1  | 622  | 0. 37782 | 6. 037414551 | 1  |
| MSTRG. 19945. 1  | 53   | 0. 29988 | 6. 809143066 | 1  |
| MSTRG. 19947. 1  | 66   | 0. 39558 | 9. 50567627  | 1  |
| MSTRG. 19946. 2  | 486  | 0. 31    | 9. 593933105 | 1  |
| MSTRG. 19967. 1  | 352  | 0. 27911 | 6. 304748535 | 1  |
| MSTRG. 19967. 5  | 352  | 0. 33898 | 6. 304748535 | 1  |
| MSTRG. 19967. 4  | 128  | 0. 31437 | 9. 253234863 | 1  |
| MSTRG. 19967. 8  | 78   | 0. 36981 | 11. 51898193 | 1  |
| MSTRG. 19965. 2  | 523  | 0. 40345 | 9. 014953613 | 1  |
| MSTRG. 19978. 1  | 526  | 0. 44228 | 8. 168640137 | 1  |
| MSTRG. 19978. 3  | 568  | 0. 38641 | 9. 501037598 | 1  |
| MSTRG. 19978. 2  | 580  | 0. 444   | 6. 929260254 | 1  |
| MSTRG. 19978. 4  | 568  | 0. 40399 | 9. 501037598 | 1  |
| MSTRG. 19978. 5  | 568  | 0. 40027 | 9. 501037598 | 1  |
| MSTRG. 19979. 1  | 130  | 0. 31702 | 11. 10870361 | 1  |
| MSTRG. 19980. 1  | 420  | 0. 47451 | 9. 215881348 | 1  |
| MSTRG. 19983. 1  | 111  | 0. 2912  | 10. 03521729 | 1  |
| MSTRG. 19985. 1  | 133  | 0. 28415 | 6. 73626709  | 1  |
| MSTRG. 19981. 1  | 57   | 0. 41641 | 8. 035339355 | 1  |
| MSTRG. 19990. 1  | 149  | 0. 28387 | 8. 765808105 | 1  |
| MSTRG. 19990. 2  | 125  | 0. 27883 | 8. 838684082 | 1  |
| MSTRG. 20000. 1  | 138  | 0. 32499 | 9. 622131348 | 1  |

|                  |      |          |              |    |
|------------------|------|----------|--------------|----|
| MSTRG. 20003. 1  | 104  | 0. 30091 | 7. 010070801 | 1  |
| MSTRG. 20006. 1  | 50   | 0. 39242 | 9. 782165527 | 1  |
| MSTRG. 20008. 1  | 129  | 0. 44412 | 8. 070129395 | 1  |
| MSTRG. 20013. 4  | 1942 | 0. 42897 | 8. 52935791  | 1  |
| MSTRG. 20013. 5  | 195  | 0. 30608 | 11. 05535889 | 1  |
| MSTRG. 20015. 3  | 301  | 0. 32905 | 7. 706481934 | 1  |
| MSTRG. 20015. 5  | 386  | 0. 38246 | 8. 919372559 | 1  |
| MSTRG. 20015. 6  | 167  | 0. 32642 | 8. 118347168 | 1  |
| MSTRG. 20018. 1  | 351  | 0. 43158 | 8. 505187988 | 1  |
| MSTRG. 20018. 2  | 367  | 0. 39642 | 8. 286682129 | 1  |
| MSTRG. 20018. 3  | 267  | 0. 40138 | 8. 108947754 | 1  |
| MSTRG. 20027. 1  | 407  | 0. 39468 | 8. 820617676 | 1  |
| MSTRG. 20033. 1  | 68   | 0. 34071 | 9. 878723145 | 1  |
| MSTRG. 20037. 1  | 78   | 0. 41968 | 9. 876281738 | 1  |
| MSTRG. 20038. 4  | 92   | 0. 28496 | 9. 507263184 | 1  |
| MSTRG. 20047. 1  | 78   | 0. 33345 | 11. 49432373 | 1  |
| MSTRG. 20056. 1  | 260  | 0. 45928 | 8. 418518066 | 1  |
| MSTRG. 20056. 4  | 260  | 0. 41559 | 8. 418518066 | 1  |
| MSTRG. 20057. 3  | 168  | 0. 39335 | 6. 272277832 | 1  |
| MSTRG. 20057. 4  | 168  | 0. 36707 | 6. 272277832 | 1  |
| MSTRG. 20059. 1  | 1813 | 0. 4801  | 9. 168518066 | 1  |
| MSTRG. 20059. 5  | 258  | 0. 37903 | 8. 213928223 | 1  |
| MSTRG. 20061. 3  | 55   | 0. 38505 | 8. 801696777 | 1  |
| MSTRG. 20061. 2  | 59   | 0. 36364 | 8. 179992676 | 1  |
| MSTRG. 20063. 1  | 79   | 0. 32813 | 9. 135681152 | 1  |
| MSTRG. 20066. 1  | 95   | 0. 31833 | 5. 756896973 | 1  |
| MSTRG. 20069. 4  | 130  | 0. 31489 | 8. 527160645 | 1  |
| MSTRG. 20074. 2  | 447  | 0. 38852 | 9. 180603027 | 1  |
| MSTRG. 20074. 4  | 430  | 0. 39317 | 9. 188171387 | 1  |
| MSTRG. 20075. 1  | 118  | 0. 35425 | 8. 550964355 | 1  |
| MSTRG. 20079. 1  | 667  | 0. 43658 | 5. 17010498  | 1  |
| MSTRG. 20086. 5  | 1590 | 0. 43034 | 6. 370788574 | 1  |
| MSTRG. 20086. 6  | 1623 | 0. 44304 | 6. 412414551 | 1  |
| MSTRG. 20086. 9  | 1623 | 0. 44707 | 6. 412414551 | 1  |
| MSTRG. 20087. 1  | 119  | 0. 34952 | 6. 063171387 | 1  |
| MSTRG. 20086. 10 | 1590 | 0. 45083 | 6. 370788574 | 1  |
| MSTRG. 20088. 2  | 307  | 0. 48146 | 5. 24041748  | 1  |
| MSTRG. 20090. 1  | 68   | 0. 34301 | 9. 494567871 | -1 |
| MSTRG. 20092. 2  | 567  | 0. 41948 | 8. 503845215 | 1  |
| MSTRG. 20094. 2  | 815  | 0. 4338  | 6. 320861816 | 1  |
| MSTRG. 20097. 2  | 356  | 0. 46581 | 4. 613464355 | 1  |
| MSTRG. 20098. 1  | 162  | 0. 2912  | 8. 83013916  | 1  |
| MSTRG. 20107. 1  | 79   | 0. 40523 | 6. 79510498  | 1  |
| MSTRG. 20109. 1  | 143  | 0. 28091 | 10. 11834717 | 1  |
| MSTRG. 20110. 1  | 300  | 0. 37645 | 6. 86517334  | 1  |
| MSTRG. 20110. 2  | 213  | 0. 31286 | 9. 299133301 | 1  |
| MSTRG. 20110. 3  | 213  | 0. 31684 | 9. 299133301 | 1  |
| MSTRG. 20114. 1  | 441  | 0. 4815  | 5. 804504395 | 1  |
| MSTRG. 20114. 2  | 353  | 0. 43818 | 6. 259094238 | 1  |
| MSTRG. 20114. 4  | 243  | 0. 47485 | 5. 592102051 | 1  |
| MSTRG. 20115. 1  | 70   | 0. 31958 | 5. 788757324 | 1  |
| MSTRG. 20112. 1  | 22   | 0. 43559 | 4. 298156738 | 1  |
| MSTRG. 20118. 1  | 97   | 0. 46719 | 7. 706481934 | -1 |
| MSTRG. 20117. 3  | 349  | 0. 35881 | 5. 672546387 | 1  |

|                 |      |          |              |    |
|-----------------|------|----------|--------------|----|
| MSTRG. 20121. 2 | 58   | 0. 33153 | 10. 09735107 | 1  |
| MSTRG. 20121. 1 | 74   | 0. 33576 | 9. 416564941 | 1  |
| MSTRG. 20119. 1 | 80   | 0. 39836 | 11. 36004639 | 1  |
| MSTRG. 20120. 1 | 553  | 0. 38581 | 8. 49017334  | 1  |
| MSTRG. 20126. 2 | 310  | 0. 33311 | 4. 794250488 | 1  |
| MSTRG. 20126. 4 | 78   | 0. 37165 | 11. 88897705 | 1  |
| MSTRG. 20126. 3 | 142  | 0. 35648 | 4. 597351074 | 1  |
| MSTRG. 20128. 2 | 75   | 0. 42097 | 6. 530212402 | -1 |
| MSTRG. 20132. 3 | 242  | 0. 45273 | 4. 546203613 | 1  |
| MSTRG. 20132. 4 | 242  | 0. 45522 | 4. 546203613 | 1  |
| MSTRG. 20135. 1 | 640  | 0. 4492  | 6. 696594238 | 1  |
| MSTRG. 20148. 1 | 147  | 0. 36522 | 7. 782165527 | 1  |
| MSTRG. 20158. 1 | 22   | 0. 33394 | 3. 563415527 | -1 |
| MSTRG. 20158. 2 | 23   | 0. 31953 | 3. 563415527 | 1  |
| MSTRG. 20158. 5 | 398  | 0. 40643 | 8. 945983887 | 1  |
| MSTRG. 20158. 6 | 128  | 0. 34059 | 9. 89251709  | 1  |
| MSTRG. 20162. 4 | 1198 | 0. 46064 | 5. 833679199 | 1  |
| MSTRG. 20163. 1 | 89   | 0. 36707 | 6. 38494873  | -1 |
| MSTRG. 20164. 1 | 60   | 0. 29966 | 6. 519958496 | 1  |
| MSTRG. 20168. 1 | 149  | 0. 27251 | 8. 504943848 | 1  |
| MSTRG. 20154. 2 | 238  | 0. 35127 | 9. 601989746 | 1  |
| MSTRG. 20155. 1 | 71   | 0. 30191 | 9. 585021973 | 1  |
| MSTRG. 20156. 1 | 183  | 0. 28883 | 9. 329650879 | 1  |
| MSTRG. 20157. 1 | 117  | 0. 37438 | 5. 104187012 | 1  |
| MSTRG. 20154. 3 | 177  | 0. 35151 | 9. 748962402 | 1  |
| MSTRG. 20172. 3 | 253  | 0. 35925 | 8. 938415527 | 1  |
| MSTRG. 20173. 1 | 79   | 0. 32575 | 6. 793273926 | 1  |
| MSTRG. 20177. 2 | 400  | 0. 45759 | 5. 680725098 | 1  |
| MSTRG. 20179. 1 | 79   | 0. 34052 | 11. 87579346 | 1  |
| MSTRG. 20180. 1 | 78   | 0. 33799 | 6. 026672363 | 1  |
| MSTRG. 20186. 1 | 511  | 0. 42159 | 7. 57244873  | 1  |
| MSTRG. 20188. 1 | 86   | 0. 35108 | 6. 385437012 | 1  |
| MSTRG. 20189. 2 | 65   | 0. 33008 | 7. 738830566 | 1  |
| MSTRG. 20189. 1 | 49   | 0. 38252 | 6. 365905762 | 1  |
| MSTRG. 20190. 1 | 39   | 0. 37553 | 9. 862609863 | 1  |
| MSTRG. 20193. 2 | 139  | 0. 27089 | 9. 47467041  | 1  |
| MSTRG. 20193. 3 | 143  | 0. 28338 | 9. 814025879 | 1  |
| MSTRG. 20198. 2 | 591  | 0. 3928  | 8. 832458496 | 1  |
| MSTRG. 20198. 1 | 599  | 0. 3904  | 8. 832458496 | 1  |
| MSTRG. 20199. 1 | 9    | 0. 34813 | 11. 69903564 | 1  |
| MSTRG. 20200. 3 | 619  | 0. 45115 | 5. 047180176 | 1  |
| MSTRG. 20202. 1 | 85   | 0. 38487 | 11. 24835205 | 1  |
| MSTRG. 20203. 2 | 328  | 0. 4105  | 9. 834899902 | 1  |
| MSTRG. 20210. 4 | 682  | 0. 43992 | 9. 521789551 | 1  |
| MSTRG. 20210. 3 | 681  | 0. 48263 | 9. 497253418 | 1  |
| MSTRG. 20210. 5 | 263  | 0. 30419 | 8. 061462402 | 1  |
| MSTRG. 20210. 6 | 103  | 0. 2921  | 9. 342346191 | 1  |
| MSTRG. 20212. 1 | 88   | 0. 30463 | 9. 85345459  | 1  |
| MSTRG. 20212. 2 | 93   | 0. 27289 | 6. 681091309 | 1  |
| MSTRG. 20212. 3 | 78   | 0. 3145  | 9. 741760254 | 1  |
| MSTRG. 20212. 4 | 93   | 0. 28385 | 6. 681091309 | 1  |
| MSTRG. 20210. 7 | 54   | 0. 39965 | 6. 066101074 | 1  |
| MSTRG. 20207. 2 | 474  | 0. 45106 | 5. 347839355 | 1  |
| MSTRG. 20207. 3 | 515  | 0. 43741 | 5. 670837402 | -1 |

|                  |      |          |              |   |
|------------------|------|----------|--------------|---|
| MSTRG. 20207. 4  | 474  | 0. 46513 | 5. 347839355 | 1 |
| MSTRG. 20208. 3  | 808  | 0. 43819 | 8. 546691895 | 1 |
| MSTRG. 20213. 5  | 124  | 0. 27674 | 11. 10101318 | 1 |
| MSTRG. 20213. 6  | 124  | 0. 27274 | 11. 10101318 | 1 |
| MSTRG. 20214. 1  | 94   | 0. 31942 | 7. 998352051 | 1 |
| MSTRG. 20215. 1  | 78   | 0. 31971 | 11. 87835693 | 1 |
| MSTRG. 20216. 1  | 91   | 0. 32962 | 4. 855285645 | 1 |
| MSTRG. 20218. 4  | 517  | 0. 37676 | 4. 96661377  | 1 |
| MSTRG. 20218. 5  | 480  | 0. 4203  | 4. 922180176 | 1 |
| MSTRG. 20220. 1  | 142  | 0. 32384 | 10. 82818604 | 1 |
| MSTRG. 20225. 1  | 65   | 0. 3877  | 8. 888244629 | 1 |
| MSTRG. 20225. 2  | 25   | 0. 41322 | 8. 020935059 | 1 |
| MSTRG. 20226. 2  | 180  | 0. 42613 | 9. 468933105 | 1 |
| MSTRG. 20226. 3  | 243  | 0. 41227 | 9. 526184082 | 1 |
| MSTRG. 20226. 4  | 177  | 0. 44212 | 9. 72442627  | 1 |
| MSTRG. 20227. 6  | 1895 | 0. 47047 | 8. 040588379 | 1 |
| MSTRG. 20227. 5  | 2031 | 0. 46277 | 8. 036804199 | 1 |
| MSTRG. 20227. 3  | 2032 | 0. 46791 | 8. 036804199 | 1 |
| MSTRG. 20227. 4  | 2031 | 0. 46791 | 8. 036804199 | 1 |
| MSTRG. 20227. 8  | 2031 | 0. 45785 | 8. 036804199 | 1 |
| MSTRG. 20227. 10 | 2032 | 0. 46277 | 8. 036804199 | 1 |
| MSTRG. 20227. 9  | 2032 | 0. 45523 | 8. 036804199 | 1 |
| MSTRG. 20227. 11 | 2031 | 0. 45969 | 8. 036804199 | 1 |
| MSTRG. 20227. 12 | 2031 | 0. 47129 | 8. 036804199 | 1 |
| MSTRG. 20228. 1  | 75   | 0. 4057  | 8. 22076416  | 1 |
| MSTRG. 20229. 1  | 1761 | 0. 38038 | 5. 366760254 | 1 |
| MSTRG. 20222. 3  | 112  | 0. 36242 | 9. 144958496 | 1 |
| MSTRG. 20222. 4  | 229  | 0. 47463 | 5. 988464355 | 1 |
| MSTRG. 20223. 1  | 520  | 0. 31822 | 8. 07611084  | 1 |
| MSTRG. 20223. 2  | 520  | 0. 35222 | 8. 07611084  | 1 |
| MSTRG. 20241. 1  | 1583 | 0. 45114 | 5. 931335449 | 1 |
| MSTRG. 20241. 2  | 1569 | 0. 45934 | 5. 913269043 | 1 |
| MSTRG. 20241. 3  | 1583 | 0. 44835 | 5. 931335449 | 1 |
| MSTRG. 20241. 5  | 1569 | 0. 46299 | 5. 913269043 | 1 |
| MSTRG. 20241. 4  | 1587 | 0. 46705 | 5. 931335449 | 1 |
| MSTRG. 20241. 6  | 1587 | 0. 46857 | 5. 931335449 | 1 |
| MSTRG. 20231. 1  | 242  | 0. 31203 | 10. 5055542  | 1 |
| MSTRG. 20231. 2  | 117  | 0. 29366 | 11. 43206787 | 1 |
| MSTRG. 20232. 1  | 55   | 0. 35617 | 10. 52874756 | 1 |
| MSTRG. 20233. 1  | 329  | 0. 43664 | 5. 339172363 | 1 |
| MSTRG. 20242. 4  | 486  | 0. 29076 | 8. 702697754 | 1 |
| MSTRG. 20242. 1  | 486  | 0. 31634 | 8. 702697754 | 1 |
| MSTRG. 20242. 2  | 482  | 0. 31634 | 8. 709289551 | 1 |
| MSTRG. 20242. 3  | 486  | 0. 31386 | 8. 702697754 | 1 |
| MSTRG. 20242. 5  | 482  | 0. 27943 | 8. 709289551 | 1 |
| MSTRG. 20242. 8  | 486  | 0. 27867 | 8. 702697754 | 1 |
| MSTRG. 20244. 2  | 499  | 0. 43286 | 5. 552429199 | 1 |
| MSTRG. 20245. 1  | 248  | 0. 34829 | 6. 10723877  | 1 |
| MSTRG. 20246. 1  | 259  | 0. 28567 | 8. 346008301 | 1 |
| MSTRG. 20246. 3  | 314  | 0. 36817 | 7. 977111816 | 1 |
| MSTRG. 20249. 4  | 803  | 0. 34261 | 9. 281555176 | 1 |
| MSTRG. 20250. 2  | 625  | 0. 35165 | 4. 550598145 | 1 |
| MSTRG. 20250. 4  | 616  | 0. 46071 | 4. 533630371 | 1 |
| MSTRG. 20250. 7  | 597  | 0. 36047 | 4. 551330566 | 1 |

|                  |      |          |              |    |
|------------------|------|----------|--------------|----|
| MSTRG. 20250. 8  | 616  | 0. 43941 | 4. 533630371 | 1  |
| MSTRG. 20251. 1  | 55   | 0. 31526 | 8. 528137207 | -1 |
| MSTRG. 20247. 1  | 1283 | 0. 40408 | 5. 369567871 | 1  |
| MSTRG. 20247. 2  | 1282 | 0. 40408 | 5. 369567871 | 1  |
| MSTRG. 20248. 1  | 59   | 0. 29871 | 6. 208312988 | 1  |
| MSTRG. 20257. 1  | 309  | 0. 45917 | 9. 219177246 | 1  |
| MSTRG. 20257. 2  | 119  | 0. 42641 | 5. 075378418 | -1 |
| MSTRG. 20269. 2  | 309  | 0. 28035 | 9. 375549316 | 1  |
| MSTRG. 20270. 1  | 62   | 0. 343   | 7. 740905762 | 1  |
| MSTRG. 20270. 2  | 62   | 0. 34459 | 7. 740905762 | 1  |
| MSTRG. 20270. 3  | 62   | 0. 33802 | 7. 740905762 | 1  |
| MSTRG. 20271. 2  | 709  | 0. 45538 | 6. 448059082 | 1  |
| MSTRG. 20272. 1  | 397  | 0. 40982 | 5. 751647949 | 1  |
| MSTRG. 20274. 1  | 70   | 0. 43047 | 11. 28448486 | 1  |
| MSTRG. 20274. 5  | 489  | 0. 43903 | 8. 955749512 | 1  |
| MSTRG. 20274. 4  | 489  | 0. 45264 | 8. 955749512 | 1  |
| MSTRG. 20274. 6  | 79   | 0. 32762 | 10. 00860596 | 1  |
| MSTRG. 20277. 1  | 90   | 0. 36769 | 5. 891784668 | 1  |
| MSTRG. 20278. 2  | 148  | 0. 38921 | 8. 764343262 | 1  |
| MSTRG. 20279. 1  | 468  | 0. 46048 | 6. 279602051 | 1  |
| MSTRG. 20281. 2  | 425  | 0. 46184 | 6. 197570801 | 1  |
| MSTRG. 20281. 4  | 425  | 0. 44573 | 6. 197570801 | 1  |
| MSTRG. 20287. 3  | 714  | 0. 41894 | 9. 147277832 | 1  |
| MSTRG. 20288. 2  | 177  | 0. 37862 | 9. 924133301 | 1  |
| MSTRG. 20288. 3  | 178  | 0. 39071 | 9. 893371582 | 1  |
| MSTRG. 20290. 1  | 727  | 0. 33144 | 4. 969055176 | 1  |
| MSTRG. 20291. 3  | 44   | 0. 40943 | 9. 09942627  | 1  |
| MSTRG. 20292. 1  | 932  | 0. 41532 | 6. 411682129 | 1  |
| MSTRG. 20292. 2  | 938  | 0. 41532 | 6. 340759277 | 1  |
| MSTRG. 20292. 3  | 932  | 0. 41656 | 6. 411682129 | 1  |
| MSTRG. 20292. 4  | 932  | 0. 41532 | 6. 411682129 | 1  |
| MSTRG. 20292. 7  | 831  | 0. 37643 | 6. 710998535 | 1  |
| MSTRG. 20293. 1  | 175  | 0. 42213 | 10. 50933838 | 1  |
| MSTRG. 20298. 3  | 256  | 0. 33323 | 7. 969421387 | 1  |
| MSTRG. 20298. 4  | 354  | 0. 32858 | 8. 566223145 | 1  |
| MSTRG. 20298. 5  | 458  | 0. 35156 | 6. 348083496 | 1  |
| MSTRG. 20298. 6  | 457  | 0. 35156 | 6. 348083496 | 1  |
| MSTRG. 20298. 7  | 354  | 0. 33323 | 8. 566223145 | 1  |
| MSTRG. 20299. 1  | 183  | 0. 3216  | 10. 77044678 | 1  |
| MSTRG. 20315. 2  | 1460 | 0. 43041 | 6. 317565918 | 1  |
| MSTRG. 20315. 4  | 681  | 0. 46059 | 6. 323547363 | 1  |
| MSTRG. 20315. 6  | 614  | 0. 41598 | 7. 085510254 | 1  |
| MSTRG. 20315. 5  | 681  | 0. 46166 | 6. 323547363 | 1  |
| MSTRG. 20315. 7  | 87   | 0. 31853 | 9. 941833496 | 1  |
| MSTRG. 20315. 11 | 696  | 0. 38485 | 9. 407409668 | 1  |
| MSTRG. 20315. 14 | 567  | 0. 30846 | 9. 651062012 | 1  |
| MSTRG. 20315. 16 | 547  | 0. 34996 | 9. 537902832 | 1  |
| MSTRG. 20318. 1  | 38   | 0. 38727 | 8. 489807129 | 1  |
| MSTRG. 20308. 1  | 212  | 0. 39511 | 11. 67718506 | 1  |
| MSTRG. 20310. 1  | 258  | 0. 36269 | 5. 653991699 | 1  |
| MSTRG. 20313. 1  | 168  | 0. 46977 | 5. 674865723 | 1  |
| MSTRG. 20313. 2  | 235  | 0. 42951 | 5. 773742676 | 1  |
| MSTRG. 20313. 3  | 375  | 0. 49522 | 5. 046936035 | 1  |
| MSTRG. 20313. 4  | 55   | 0. 42292 | 4. 862976074 | 1  |

|                  |      |          |              |    |
|------------------|------|----------|--------------|----|
| MSTRG. 20313. 5  | 168  | 0. 4961  | 5. 674865723 | 1  |
| MSTRG. 20334. 1  | 861  | 0. 37975 | 5. 049255371 | 1  |
| MSTRG. 20335. 3  | 142  | 0. 497   | 4. 374206543 | 1  |
| MSTRG. 20338. 1  | 76   | 0. 31089 | 6. 88458252  | 1  |
| MSTRG. 20338. 2  | 74   | 0. 36711 | 10. 07098389 | 1  |
| MSTRG. 20339. 3  | 87   | 0. 35019 | 6. 174621582 | 1  |
| MSTRG. 20339. 4  | 87   | 0. 3407  | 6. 174621582 | 1  |
| MSTRG. 20345. 2  | 92   | 0. 28247 | 6. 825134277 | 1  |
| MSTRG. 20346. 2  | 237  | 0. 39156 | 8. 291809082 | 1  |
| MSTRG. 20347. 4  | 146  | 0. 45047 | 8. 38885498  | 1  |
| MSTRG. 20321. 1  | 41   | 0. 38487 | 9. 148864746 | 1  |
| MSTRG. 20328. 4  | 85   | 0. 40879 | 4. 545959473 | 1  |
| MSTRG. 20328. 5  | 154  | 0. 40879 | 5. 315490723 | 1  |
| MSTRG. 20328. 6  | 85   | 0. 40879 | 4. 545959473 | 1  |
| MSTRG. 20330. 1  | 24   | 0. 31455 | 9. 34967041  | 1  |
| MSTRG. 20332. 6  | 70   | 0. 34554 | 7. 659851074 | 1  |
| MSTRG. 20354. 1  | 48   | 0. 30368 | 9. 381896973 | 1  |
| MSTRG. 20361. 1  | 8    | 0. 34377 | 5. 272766113 | 1  |
| MSTRG. 20362. 1  | 5    | 0. 26606 | 5. 272766113 | 1  |
| MSTRG. 20362. 2  | 27   | 0. 27884 | 6. 682189941 | 1  |
| MSTRG. 20362. 3  | 26   | 0. 33102 | 5. 816223145 | 1  |
| MSTRG. 20366. 1  | 105  | 0. 2782  | 8. 763244629 | 1  |
| MSTRG. 20367. 3  | 94   | 0. 39759 | 10. 00860596 | 1  |
| MSTRG. 20367. 4  | 94   | 0. 39573 | 10. 00860596 | 1  |
| MSTRG. 20367. 6  | 250  | 0. 37223 | 9. 277648926 | 1  |
| MSTRG. 20367. 5  | 182  | 0. 37976 | 9. 585632324 | 1  |
| MSTRG. 20376. 4  | 196  | 0. 43319 | 10. 15289307 | 1  |
| MSTRG. 20376. 5  | 196  | 0. 39385 | 10. 15289307 | 1  |
| MSTRG. 20376. 7  | 196  | 0. 4425  | 10. 15289307 | 1  |
| MSTRG. 20376. 8  | 196  | 0. 3969  | 10. 15289307 | 1  |
| MSTRG. 20376. 6  | 196  | 0. 27437 | 10. 15289307 | 1  |
| MSTRG. 20376. 9  | 92   | 0. 29526 | 9. 239074707 | 1  |
| MSTRG. 20376. 10 | 196  | 0. 27379 | 10. 15289307 | 1  |
| MSTRG. 20378. 2  | 227  | 0. 44312 | 7. 012390137 | 1  |
| MSTRG. 20382. 3  | 1195 | 0. 43472 | 5. 913024902 | 1  |
| MSTRG. 20382. 5  | 1207 | 0. 43472 | 6. 067932129 | 1  |
| MSTRG. 20382. 8  | 1163 | 0. 44883 | 5. 958312988 | -1 |
| MSTRG. 20387. 2  | 816  | 0. 38938 | 9. 084777832 | 1  |
| MSTRG. 20387. 8  | 5    | 0. 36354 | 8. 500061035 | 1  |
| MSTRG. 20387. 7  | 962  | 0. 38046 | 6. 592712402 | 1  |
| MSTRG. 20388. 1  | 62   | 0. 34219 | 9. 913513184 | 1  |
| MSTRG. 20393. 1  | 62   | 0. 33695 | 10. 28094482 | 1  |
| MSTRG. 20394. 1  | 624  | 0. 44435 | 6. 069519043 | 1  |
| MSTRG. 20395. 1  | 356  | 0. 32513 | 8. 052185059 | 1  |
| MSTRG. 20395. 2  | 356  | 0. 32513 | 8. 052185059 | 1  |
| MSTRG. 20395. 3  | 356  | 0. 35383 | 8. 052185059 | 1  |
| MSTRG. 20395. 4  | 282  | 0. 33063 | 7. 164367676 | 1  |
| MSTRG. 20395. 14 | 282  | 0. 4461  | 7. 164367676 | 1  |
| MSTRG. 20395. 10 | 356  | 0. 41461 | 8. 052185059 | 1  |
| MSTRG. 20395. 11 | 356  | 0. 43006 | 8. 052185059 | 1  |
| MSTRG. 20395. 7  | 356  | 0. 43096 | 8. 052185059 | 1  |
| MSTRG. 20395. 8  | 356  | 0. 38163 | 8. 052185059 | 1  |
| MSTRG. 20395. 12 | 282  | 0. 41038 | 7. 164367676 | 1  |
| MSTRG. 20395. 13 | 356  | 0. 40013 | 8. 052185059 | 1  |



|                 |      |          |              |    |
|-----------------|------|----------|--------------|----|
| MSTRG. 20395. 9 | 356  | 0. 44242 | 8. 052185059 | 1  |
| MSTRG. 20396. 1 | 109  | 0. 36839 | 5. 323425293 | 1  |
| MSTRG. 20397. 1 | 326  | 0. 44329 | 5. 064025879 | 1  |
| MSTRG. 20396. 2 | 113  | 0. 31098 | 6. 704040527 | 1  |
| MSTRG. 20396. 3 | 113  | 0. 37478 | 6. 704040527 | 1  |
| MSTRG. 20396. 4 | 113  | 0. 33221 | 6. 704040527 | 1  |
| MSTRG. 20390. 2 | 698  | 0. 38079 | 4. 495788574 | 1  |
| MSTRG. 20392. 1 | 1634 | 0. 45921 | 6. 858947754 | 1  |
| MSTRG. 20400. 7 | 127  | 0. 35797 | 9. 051208496 | 1  |
| MSTRG. 20401. 1 | 84   | 0. 35047 | 8. 313293457 | 1  |
| MSTRG. 20402. 1 | 58   | 0. 35921 | 9. 78326416  | 1  |
| MSTRG. 20403. 1 | 125  | 0. 38044 | 8. 817810059 | 1  |
| MSTRG. 20407. 1 | 121  | 0. 34201 | 11. 16351318 | 1  |
| MSTRG. 20414. 2 | 797  | 0. 4509  | 7. 276306152 | 1  |
| MSTRG. 20415. 1 | 106  | 0. 28283 | 8. 78704834  | 1  |
| MSTRG. 20416. 1 | 299  | 0. 35593 | 8. 833312988 | 1  |
| MSTRG. 20421. 1 | 432  | 0. 44265 | 6. 930725098 | 1  |
| MSTRG. 20421. 2 | 432  | 0. 44722 | 6. 930725098 | 1  |
| MSTRG. 20421. 3 | 432  | 0. 38289 | 6. 930725098 | 1  |
| MSTRG. 20424. 1 | 34   | 0. 33694 | 7. 602478027 | 1  |
| MSTRG. 20426. 1 | 514  | 0. 38253 | 4. 940368652 | 1  |
| MSTRG. 20426. 2 | 514  | 0. 39737 | 4. 940368652 | 1  |
| MSTRG. 20429. 2 | 200  | 0. 435   | 5. 524230957 | 1  |
| MSTRG. 20430. 1 | 44   | 0. 37863 | 11. 73394775 | -1 |
| MSTRG. 20433. 4 | 914  | 0. 4529  | 5. 813049316 | 1  |
| MSTRG. 20434. 1 | 89   | 0. 28883 | 9. 689147949 | 1  |
| MSTRG. 20433. 7 | 140  | 0. 39071 | 12. 17779541 | 1  |
| MSTRG. 20431. 2 | 429  | 0. 37405 | 8. 134460449 | 1  |
| MSTRG. 20431. 3 | 319  | 0. 44936 | 6. 110534668 | 1  |
| MSTRG. 20431. 4 | 133  | 0. 30244 | 9. 863464355 | 1  |
| MSTRG. 20438. 4 | 219  | 0. 29092 | 9. 72052002  | 1  |
| MSTRG. 20439. 1 | 307  | 0. 29223 | 7. 61517334  | 1  |
| MSTRG. 20439. 2 | 307  | 0. 36309 | 7. 61517334  | 1  |
| MSTRG. 20439. 3 | 159  | 0. 36554 | 9. 040710449 | 1  |
| MSTRG. 20440. 1 | 205  | 0. 27274 | 10. 69366455 | 1  |
| MSTRG. 20440. 2 | 205  | 0. 27678 | 10. 69366455 | 1  |
| MSTRG. 20446. 2 | 388  | 0. 40803 | 8. 83795166  | 1  |
| MSTRG. 20451. 2 | 517  | 0. 29755 | 8. 364562988 | 1  |
| MSTRG. 20452. 1 | 28   | 0. 43786 | 11. 52459717 | 1  |
| MSTRG. 20453. 1 | 552  | 0. 48337 | 9. 15423584  | 1  |
| MSTRG. 20455. 2 | 193  | 0. 46174 | 8. 180603027 | -1 |
| MSTRG. 20457. 2 | 1049 | 0. 4762  | 6. 741394043 | 1  |
| MSTRG. 20457. 4 | 810  | 0. 45283 | 6. 23236084  | 1  |
| MSTRG. 20457. 7 | 810  | 0. 46015 | 6. 23236084  | 1  |
| MSTRG. 20457. 6 | 810  | 0. 44044 | 6. 23236084  | 1  |
| MSTRG. 20457. 8 | 351  | 0. 40454 | 6. 376403809 | 1  |
| MSTRG. 20469. 1 | 250  | 0. 42377 | 4. 557800293 | 1  |
| MSTRG. 20469. 2 | 283  | 0. 43098 | 4. 64666748  | 1  |
| MSTRG. 20471. 1 | 83   | 0. 28518 | 6. 24005127  | 1  |
| MSTRG. 20471. 2 | 98   | 0. 28572 | 9. 914367676 | 1  |
| MSTRG. 20473. 2 | 135  | 0. 37483 | 4. 722106934 | 1  |
| MSTRG. 20474. 1 | 58   | 0. 43873 | 4. 32598877  | -1 |
| MSTRG. 20476. 1 | 75   | 0. 46202 | 7. 781677246 | 1  |
| MSTRG. 20482. 6 | 116  | 0. 32413 | 6. 229431152 | 1  |

|                 |     |          |              |    |
|-----------------|-----|----------|--------------|----|
| MSTRG. 20483. 1 | 170 | 0. 28334 | 8. 910949707 | 1  |
| MSTRG. 20484. 1 | 96  | 0. 35545 | 6. 818664551 | 1  |
| MSTRG. 20486. 1 | 72  | 0. 3307  | 7. 702819824 | 1  |
| MSTRG. 20479. 1 | 56  | 0. 38915 | 8. 737854004 | -1 |
| MSTRG. 20489. 1 | 78  | 0. 40301 | 9. 68951416  | 1  |
| MSTRG. 20504. 2 | 123 | 0. 36174 | 7. 733093262 | 1  |
| MSTRG. 20505. 1 | 538 | 0. 44044 | 7. 523864746 | 1  |
| MSTRG. 20506. 1 | 205 | 0. 4484  | 6. 15435791  | 1  |
| MSTRG. 20512. 1 | 78  | 0. 28731 | 7. 906555176 | 1  |
| MSTRG. 20512. 2 | 61  | 0. 37585 | 6. 003112793 | -1 |
| MSTRG. 20512. 3 | 68  | 0. 30521 | 4. 457580566 | 1  |
| MSTRG. 20512. 4 | 107 | 0. 27587 | 8. 960144043 | 1  |
| MSTRG. 20512. 5 | 68  | 0. 29919 | 4. 457580566 | 1  |
| MSTRG. 20512. 6 | 44  | 0. 26381 | 10. 27740479 | 1  |
| MSTRG. 20514. 1 | 61  | 0. 36826 | 4. 87689209  | 1  |
| MSTRG. 20516. 1 | 20  | 0. 34385 | 9. 782043457 | -1 |
| MSTRG. 20526. 1 | 75  | 0. 33698 | 6. 689758301 | 1  |
| MSTRG. 20528. 1 | 337 | 0. 34576 | 8. 960876465 | 1  |
| MSTRG. 20547. 1 | 74  | 0. 32971 | 7. 882873535 | 1  |
| MSTRG. 20552. 1 | 46  | 0. 41227 | 8. 065002441 | -1 |
| MSTRG. 20565. 1 | 34  | 0. 36178 | 9. 05682373  | 1  |
| MSTRG. 20566. 1 | 104 | 0. 34606 | 8. 440002441 | 1  |
| MSTRG. 20568. 2 | 780 | 0. 45607 | 6. 658874512 | 1  |
| MSTRG. 20569. 1 | 84  | 0. 41014 | 10. 29205322 | 1  |
| MSTRG. 20570. 1 | 29  | 0. 36341 | 10. 7366333  | 1  |
| MSTRG. 20571. 1 | 500 | 0. 44686 | 8. 723693848 | 1  |
| MSTRG. 20574. 1 | 117 | 0. 3819  | 11. 57366943 | 1  |
| MSTRG. 20577. 2 | 435 | 0. 39616 | 6. 643249512 | 1  |
| MSTRG. 20577. 3 | 71  | 0. 3333  | 7. 90814209  | 1  |
| MSTRG. 20579. 2 | 151 | 0. 33514 | 10. 47601318 | 1  |
| MSTRG. 20579. 4 | 406 | 0. 33698 | 7. 774353027 | 1  |
| MSTRG. 20580. 1 | 69  | 0. 30638 | 10. 10125732 | 1  |
| MSTRG. 20581. 1 | 56  | 0. 35496 | 9. 099182129 | 1  |
| MSTRG. 20583. 1 | 181 | 0. 3     | 5. 65838623  | 1  |
| MSTRG. 20584. 1 | 29  | 0. 30553 | 7. 868469238 | 1  |
| MSTRG. 20593. 2 | 240 | 0. 29452 | 5. 688415527 | 1  |
| MSTRG. 20593. 3 | 259 | 0. 39349 | 6. 197937012 | 1  |
| MSTRG. 20608. 7 | 524 | 0. 45252 | 8. 946350098 | 1  |
| MSTRG. 20608. 6 | 804 | 0. 39341 | 9. 395324707 | 1  |
| MSTRG. 20609. 1 | 212 | 0. 28459 | 8. 694641113 | 1  |
| MSTRG. 20610. 1 | 204 | 0. 30847 | 9. 923522949 | 1  |
| MSTRG. 20608. 8 | 632 | 0. 31444 | 9. 216247559 | 1  |
| MSTRG. 20611. 1 | 67  | 0. 32016 | 5. 964538574 | 1  |
| MSTRG. 20612. 1 | 63  | 0. 31596 | 6. 033752441 | 1  |
| MSTRG. 20608. 9 | 371 | 0. 36161 | 9. 730895996 | 1  |
| MSTRG. 20603. 1 | 98  | 0. 31825 | 10. 11541748 | 1  |
| MSTRG. 20603. 2 | 98  | 0. 34247 | 10. 11541748 | 1  |
| MSTRG. 20603. 3 | 235 | 0. 31532 | 5. 113342285 | 1  |
| MSTRG. 20613. 1 | 177 | 0. 41129 | 5. 72454834  | 1  |
| MSTRG. 20613. 2 | 177 | 0. 43663 | 5. 72454834  | 1  |
| MSTRG. 20614. 1 | 62  | 0. 38148 | 9. 217834473 | 1  |
| MSTRG. 20616. 1 | 88  | 0. 36833 | 7. 705383301 | 1  |
| MSTRG. 20618. 2 | 330 | 0. 37603 | 9. 075744629 | 1  |
| MSTRG. 20620. 2 | 7   | 0. 32323 | 6. 001647949 | 1  |

|                  |      |          |              |    |
|------------------|------|----------|--------------|----|
| MSTRG. 20619. 4  | 763  | 0. 48483 | 6. 183166504 | 1  |
| MSTRG. 20621. 1  | 141  | 0. 2921  | 9. 31829834  | 1  |
| MSTRG. 20628. 2  | 524  | 0. 41941 | 4. 920715332 | 1  |
| MSTRG. 20629. 1  | 33   | 0. 45226 | 4. 295837402 | -1 |
| MSTRG. 20629. 2  | 26   | 0. 43922 | 12. 30426025 | 1  |
| MSTRG. 20631. 2  | 275  | 0. 39192 | 9. 944152832 | 1  |
| MSTRG. 20631. 3  | 149  | 0. 33906 | 9. 369567871 | 1  |
| MSTRG. 20634. 1  | 860  | 0. 46336 | 6. 393127441 | 1  |
| MSTRG. 20634. 2  | 755  | 0. 49724 | 6. 178527832 | 1  |
| MSTRG. 20634. 3  | 138  | 0. 3056  | 8. 91204834  | 1  |
| MSTRG. 20637. 3  | 451  | 0. 36389 | 5. 711364746 | 1  |
| MSTRG. 20637. 5  | 451  | 0. 40765 | 5. 711364746 | 1  |
| MSTRG. 20637. 4  | 498  | 0. 42864 | 5. 768249512 | 1  |
| MSTRG. 20638. 1  | 48   | 0. 39423 | 10. 05230713 | 1  |
| MSTRG. 20642. 1  | 138  | 0. 3363  | 6. 868103027 | 1  |
| MSTRG. 20654. 1  | 55   | 0. 45679 | 6. 808532715 | -1 |
| MSTRG. 20654. 2  | 4605 | 0. 45229 | 6. 225891113 | 1  |
| MSTRG. 20654. 4  | 131  | 0. 34561 | 9. 636047363 | 1  |
| MSTRG. 20654. 3  | 640  | 0. 43859 | 7. 779724121 | 1  |
| MSTRG. 20654. 5  | 314  | 0. 43128 | 9. 307800293 | 1  |
| MSTRG. 20654. 12 | 184  | 0. 38791 | 9. 657165527 | 1  |
| MSTRG. 20654. 8  | 328  | 0. 26107 | 9. 333190918 | 1  |
| MSTRG. 20654. 10 | 395  | 0. 32053 | 6. 325744629 | 1  |
| MSTRG. 20654. 11 | 1593 | 0. 45628 | 6. 27166748  | 1  |
| MSTRG. 20654. 9  | 2037 | 0. 35925 | 6. 395812988 | 1  |
| MSTRG. 20654. 6  | 2799 | 0. 38789 | 6. 24041748  | 1  |
| MSTRG. 20654. 7  | 2692 | 0. 42048 | 6. 186340332 | 1  |
| MSTRG. 20654. 13 | 120  | 0. 34358 | 10. 55389404 | 1  |
| MSTRG. 20656. 1  | 114  | 0. 27289 | 7. 047302246 | 1  |
| MSTRG. 20657. 1  | 76   | 0. 31525 | 7. 813659668 | 1  |
| MSTRG. 20658. 1  | 144  | 0. 39852 | 10. 17254639 | 1  |
| MSTRG. 20654. 14 | 128  | 0. 29257 | 5. 770812988 | 1  |
| MSTRG. 20660. 2  | 594  | 0. 36612 | 9. 326599121 | 1  |
| MSTRG. 20644. 1  | 512  | 0. 4033  | 7. 076477051 | 1  |
| MSTRG. 20644. 3  | 526  | 0. 36221 | 7. 727478027 | 1  |
| MSTRG. 20644. 6  | 236  | 0. 29615 | 8. 430114746 | 1  |
| MSTRG. 20646. 1  | 461  | 0. 45141 | 8. 089172363 | 1  |
| MSTRG. 20649. 2  | 948  | 0. 43692 | 8. 222106934 | 1  |
| MSTRG. 20649. 3  | 803  | 0. 44549 | 7. 670837402 | 1  |
| MSTRG. 20662. 1  | 61   | 0. 37436 | 10. 61419678 | 1  |
| MSTRG. 20662. 2  | 70   | 0. 36702 | 10. 04608154 | 1  |
| MSTRG. 20662. 3  | 136  | 0. 40288 | 11. 26934814 | 1  |
| MSTRG. 20662. 4  | 136  | 0. 36698 | 11. 26934814 | 1  |
| MSTRG. 20662. 5  | 136  | 0. 39357 | 11. 26934814 | 1  |
| MSTRG. 20662. 6  | 136  | 0. 37691 | 11. 26934814 | 1  |
| MSTRG. 20664. 1  | 528  | 0. 39212 | 5. 077941895 | 1  |
| MSTRG. 20664. 2  | 282  | 0. 3481  | 4. 863220215 | 1  |
| MSTRG. 20667. 2  | 85   | 0. 3164  | 9. 424743652 | 1  |
| MSTRG. 20668. 1  | 133  | 0. 44329 | 5. 546447754 | 1  |
| MSTRG. 20669. 2  | 276  | 0. 32284 | 9. 32598877  | 1  |
| MSTRG. 20670. 1  | 83   | 0. 33266 | 6. 25189209  | 1  |
| MSTRG. 20672. 6  | 449  | 0. 43033 | 4. 513977051 | 1  |
| MSTRG. 20672. 8  | 287  | 0. 3417  | 4. 460510254 | 1  |
| MSTRG. 20674. 1  | 1569 | 0. 38392 | 5. 963806152 | 1  |

|                  |      |          |              |    |
|------------------|------|----------|--------------|----|
| MSTRG. 20674. 3  | 1719 | 0. 39438 | 6. 097473145 | 1  |
| MSTRG. 20674. 5  | 1615 | 0. 4559  | 6. 07635498  | 1  |
| MSTRG. 20674. 6  | 65   | 0. 36427 | 8. 589782715 | -1 |
| MSTRG. 20678. 2  | 2273 | 0. 47686 | 5. 637268066 | 1  |
| MSTRG. 20678. 3  | 166  | 0. 45857 | 8. 263122559 | 1  |
| MSTRG. 20678. 4  | 1938 | 0. 47758 | 5. 934875488 | 1  |
| MSTRG. 20679. 1  | 53   | 0. 42178 | 9. 430114746 | 1  |
| MSTRG. 20677. 1  | 228  | 0. 29305 | 8. 920715332 | 1  |
| MSTRG. 20681. 1  | 77   | 0. 45513 | 9. 596252441 | -1 |
| MSTRG. 20682. 1  | 86   | 0. 39901 | 10. 08966064 | 1  |
| MSTRG. 20682. 2  | 97   | 0. 42453 | 10. 08966064 | 1  |
| MSTRG. 20688. 2  | 82   | 0. 35099 | 9. 553649902 | 1  |
| MSTRG. 20705. 1  | 153  | 0. 37221 | 11. 75811768 | 1  |
| MSTRG. 20705. 2  | 153  | 0. 38817 | 11. 75811768 | 1  |
| MSTRG. 20710. 3  | 91   | 0. 34188 | 5. 848449707 | 1  |
| MSTRG. 20710. 5  | 164  | 0. 30733 | 9. 656433105 | 1  |
| MSTRG. 20711. 1  | 62   | 0. 36634 | 9. 484069824 | 1  |
| MSTRG. 20713. 1  | 115  | 0. 35418 | 9. 42401123  | 1  |
| MSTRG. 20708. 2  | 233  | 0. 46077 | 6. 526550293 | 1  |
| MSTRG. 20709. 1  | 138  | 0. 39497 | 9. 378356934 | 1  |
| MSTRG. 20714. 1  | 231  | 0. 33535 | 6. 886047363 | 1  |
| MSTRG. 20725. 3  | 208  | 0. 27772 | 5. 344787598 | 1  |
| MSTRG. 20725. 5  | 176  | 0. 36476 | 9. 732971191 | 1  |
| MSTRG. 20725. 4  | 418  | 0. 39825 | 5. 476989746 | 1  |
| MSTRG. 20725. 6  | 418  | 0. 39825 | 5. 476989746 | 1  |
| MSTRG. 20725. 7  | 25   | 0. 42495 | 7. 761657715 | 1  |
| MSTRG. 20725. 8  | 418  | 0. 39825 | 5. 476989746 | 1  |
| MSTRG. 20725. 9  | 116  | 0. 34531 | 8. 687927246 | 1  |
| MSTRG. 20725. 10 | 129  | 0. 30159 | 9. 503601074 | 1  |
| MSTRG. 20725. 11 | 418  | 0. 35599 | 5. 476989746 | 1  |
| MSTRG. 20725. 12 | 129  | 0. 33174 | 9. 503601074 | 1  |
| MSTRG. 20725. 14 | 153  | 0. 34123 | 9. 617126465 | 1  |
| MSTRG. 20726. 1  | 62   | 0. 34157 | 10. 90802002 | 1  |
| MSTRG. 20727. 1  | 114  | 0. 32862 | 9. 475646973 | 1  |
| MSTRG. 20728. 1  | 101  | 0. 29367 | 9. 825134277 | 1  |
| MSTRG. 20730. 12 | 68   | 0. 30436 | 6. 70135498  | 1  |
| MSTRG. 20730. 6  | 1174 | 0. 45157 | 6. 79473877  | 1  |
| MSTRG. 20730. 8  | 1426 | 0. 44975 | 6. 996887207 | 1  |
| MSTRG. 20730. 11 | 1157 | 0. 44713 | 6. 989685059 | 1  |
| MSTRG. 20730. 10 | 1549 | 0. 46099 | 6. 442077637 | 1  |
| MSTRG. 20730. 7  | 1562 | 0. 44285 | 7. 482727051 | 1  |
| MSTRG. 20730. 4  | 1534 | 0. 44285 | 7. 67755127  | 1  |
| MSTRG. 20730. 5  | 1552 | 0. 44285 | 7. 672424316 | 1  |
| MSTRG. 20730. 9  | 1192 | 0. 44713 | 6. 805603027 | 1  |
| MSTRG. 20730. 13 | 310  | 0. 35164 | 5. 074401855 | 1  |
| MSTRG. 20730. 14 | 259  | 0. 35164 | 5. 82598877  | 1  |
| MSTRG. 20718. 1  | 54   | 0. 34845 | 7. 766174316 | 1  |
| MSTRG. 20720. 2  | 91   | 0. 42025 | 10. 89581299 | 1  |
| MSTRG. 20734. 1  | 96   | 0. 32237 | 6. 070861816 | 1  |
| MSTRG. 20740. 1  | 303  | 0. 33545 | 8. 721252441 | 1  |
| MSTRG. 20742. 2  | 312  | 0. 47888 | 8. 992248535 | 1  |
| MSTRG. 20742. 3  | 377  | 0. 46866 | 8. 129943848 | 1  |
| MSTRG. 20742. 4  | 288  | 0. 46182 | 9. 157897949 | 1  |
| MSTRG. 20743. 1  | 510  | 0. 45086 | 5. 64642334  | 1  |

|                  |      |          |              |    |
|------------------|------|----------|--------------|----|
| MSTRG. 20746. 1  | 98   | 0. 30077 | 11. 09698486 | -1 |
| MSTRG. 20737. 1  | 328  | 0. 38809 | 6. 046325684 | 1  |
| MSTRG. 20737. 2  | 481  | 0. 37476 | 5. 33770752  | 1  |
| MSTRG. 20751. 2  | 278  | 0. 40482 | 5. 423522949 | 1  |
| MSTRG. 20753. 3  | 734  | 0. 44905 | 5. 262634277 | 1  |
| MSTRG. 20753. 4  | 264  | 0. 43179 | 4. 439147949 | 1  |
| MSTRG. 20750. 3  | 806  | 0. 49005 | 4. 973449707 | 1  |
| MSTRG. 20750. 1  | 809  | 0. 47758 | 4. 937438965 | 1  |
| MSTRG. 20758. 1  | 419  | 0. 40795 | 7. 031188965 | 1  |
| MSTRG. 20763. 10 | 38   | 0. 39717 | 9. 019226074 | 1  |
| MSTRG. 20763. 8  | 2775 | 0. 44937 | 9. 050964355 | -1 |
| MSTRG. 20763. 13 | 2277 | 0. 42768 | 9. 383361816 | 1  |
| MSTRG. 20774. 1  | 150  | 0. 30082 | 8. 79083252  | 1  |
| MSTRG. 20775. 4  | 566  | 0. 46631 | 8. 883605957 | 1  |
| MSTRG. 20775. 6  | 498  | 0. 48023 | 8. 383850098 | 1  |
| MSTRG. 20775. 7  | 858  | 0. 34731 | 7. 969177246 | 1  |
| MSTRG. 20775. 8  | 498  | 0. 32237 | 8. 383850098 | 1  |
| MSTRG. 20775. 9  | 105  | 0. 28759 | 9. 117858887 | 1  |
| MSTRG. 20776. 1  | 116  | 0. 30804 | 10. 690979   | 1  |
| MSTRG. 20776. 2  | 116  | 0. 31209 | 10. 690979   | 1  |
| MSTRG. 20777. 1  | 86   | 0. 28848 | 9. 508728027 | 1  |
| MSTRG. 20778. 1  | 153  | 0. 33002 | 8. 72454834  | 1  |
| MSTRG. 20780. 1  | 69   | 0. 34667 | 8. 859802246 | 1  |
| MSTRG. 20781. 1  | 189  | 0. 30715 | 10. 3394165  | 1  |
| MSTRG. 20782. 1  | 159  | 0. 35128 | 9. 34161377  | 1  |
| MSTRG. 20783. 1  | 82   | 0. 30894 | 5. 028991699 | 1  |
| MSTRG. 20781. 2  | 162  | 0. 27517 | 9. 693664551 | 1  |
| MSTRG. 20784. 1  | 164  | 0. 33102 | 6. 070861816 | 1  |
| MSTRG. 20785. 1  | 172  | 0. 33754 | 8. 707580566 | 1  |
| MSTRG. 20786. 1  | 188  | 0. 32793 | 10. 57025146 | 1  |
| MSTRG. 20775. 10 | 186  | 0. 28982 | 5. 066833496 | 1  |
| MSTRG. 20787. 1  | 206  | 0. 27794 | 9. 140075684 | 1  |
| MSTRG. 20787. 2  | 206  | 0. 27289 | 9. 140075684 | 1  |
| MSTRG. 20792. 1  | 94   | 0. 28165 | 9. 862365723 | 1  |
| MSTRG. 20793. 1  | 120  | 0. 2921  | 10. 29486084 | 1  |
| MSTRG. 20794. 1  | 205  | 0. 31209 | 9. 31829834  | 1  |
| MSTRG. 20800. 1  | 262  | 0. 33292 | 9. 065856934 | 1  |
| MSTRG. 20800. 2  | 209  | 0. 45596 | 9. 50970459  | 1  |
| MSTRG. 20801. 1  | 52   | 0. 33526 | 6. 69732666  | 1  |
| MSTRG. 20797. 1  | 51   | 0. 33811 | 9. 621032715 | -1 |
| MSTRG. 20798. 4  | 287  | 0. 45304 | 8. 81854248  | 1  |
| MSTRG. 20819. 4  | 2796 | 0. 37643 | 6. 323913574 | 1  |
| MSTRG. 20819. 8  | 3895 | 0. 47649 | 6. 184875488 | -1 |
| MSTRG. 20822. 1  | 55   | 0. 33131 | 8. 506896973 | 1  |
| MSTRG. 20816. 5  | 341  | 0. 37336 | 8. 019226074 | 1  |
| MSTRG. 20816. 3  | 381  | 0. 38438 | 8. 25579834  | 1  |
| MSTRG. 20816. 4  | 282  | 0. 38996 | 9. 630187988 | 1  |
| MSTRG. 20816. 2  | 381  | 0. 41478 | 8. 25579834  | 1  |
| MSTRG. 20823. 3  | 661  | 0. 37119 | 5. 968200684 | 1  |
| MSTRG. 20823. 4  | 704  | 0. 42886 | 5. 946716309 | 1  |
| MSTRG. 20823. 2  | 757  | 0. 44024 | 6. 302429199 | 1  |
| MSTRG. 20823. 1  | 757  | 0. 4654  | 6. 302429199 | 1  |
| MSTRG. 20817. 2  | 316  | 0. 40219 | 5. 863830566 | 1  |
| MSTRG. 20817. 1  | 634  | 0. 42679 | 7. 128112793 | 1  |

|                 |      |          |              |    |
|-----------------|------|----------|--------------|----|
| MSTRG. 20828. 4 | 586  | 0. 4562  | 6. 971008301 | 1  |
| MSTRG. 20828. 5 | 142  | 0. 29607 | 4. 740539551 | 1  |
| MSTRG. 20829. 1 | 655  | 0. 46426 | 5. 224060059 | 1  |
| MSTRG. 20829. 2 | 655  | 0. 46261 | 5. 224060059 | 1  |
| MSTRG. 20829. 5 | 510  | 0. 40768 | 5. 765319824 | 1  |
| MSTRG. 20830. 4 | 1423 | 0. 44444 | 11. 53057861 | 1  |
| MSTRG. 20825. 3 | 111  | 0. 36397 | 5. 475891113 | 1  |
| MSTRG. 20825. 4 | 111  | 0. 36769 | 5. 475891113 | 1  |
| MSTRG. 20826. 2 | 127  | 0. 31065 | 9. 252380371 | 1  |
| MSTRG. 20831. 1 | 187  | 0. 45481 | 6. 052185059 | 1  |
| MSTRG. 20832. 3 | 265  | 0. 43445 | 7. 059265137 | 1  |
| MSTRG. 20836. 2 | 2323 | 0. 49044 | 6. 781066895 | 1  |
| MSTRG. 20836. 3 | 2323 | 0. 48784 | 6. 781066895 | 1  |
| MSTRG. 20836. 4 | 2560 | 0. 47207 | 6. 696960449 | 1  |
| MSTRG. 20840. 1 | 374  | 0. 42066 | 4. 920349121 | 1  |
| MSTRG. 20845. 4 | 1687 | 0. 44621 | 5. 783874512 | 1  |
| MSTRG. 20845. 7 | 1687 | 0. 38787 | 5. 783874512 | 1  |
| MSTRG. 20845. 6 | 1687 | 0. 44621 | 5. 783874512 | 1  |
| MSTRG. 20845. 9 | 147  | 0. 34287 | 9. 431091309 | 1  |
| MSTRG. 20844. 2 | 453  | 0. 38452 | 5. 270568848 | 1  |
| MSTRG. 20850. 1 | 190  | 0. 29772 | 4. 93145752  | 1  |
| MSTRG. 20850. 3 | 113  | 0. 3152  | 10. 56170654 | -1 |
| MSTRG. 20852. 4 | 839  | 0. 44944 | 4. 746887207 | 1  |
| MSTRG. 20854. 1 | 173  | 0. 39279 | 9. 233581543 | 1  |
| MSTRG. 20854. 2 | 181  | 0. 36329 | 9. 543029785 | 1  |
| MSTRG. 20866. 1 | 25   | 0. 38398 | 8. 365661621 | 1  |
| MSTRG. 20867. 2 | 501  | 0. 44384 | 6. 17388916  | 1  |
| MSTRG. 20873. 1 | 489  | 0. 47486 | 7. 109802246 | 1  |
| MSTRG. 20873. 2 | 475  | 0. 47486 | 6. 491882324 | 1  |
| MSTRG. 20873. 3 | 434  | 0. 44342 | 6. 375061035 | 1  |
| MSTRG. 20873. 4 | 434  | 0. 44342 | 6. 375061035 | 1  |
| MSTRG. 20875. 3 | 77   | 0. 30825 | 9. 695007324 | 1  |
| MSTRG. 20875. 2 | 1503 | 0. 40858 | 7. 449401855 | 1  |
| MSTRG. 20876. 1 | 78   | 0. 29772 | 7. 565734863 | 1  |
| MSTRG. 20877. 1 | 185  | 0. 351   | 10. 51885986 | 1  |
| MSTRG. 20878. 1 | 103  | 0. 28248 | 9. 543029785 | 1  |
| MSTRG. 20872. 1 | 149  | 0. 3597  | 8. 869567871 | 1  |
| MSTRG. 20882. 1 | 475  | 0. 32005 | 8. 976257324 | 1  |
| MSTRG. 20883. 1 | 44   | 0. 33842 | 9. 617980957 | 1  |
| MSTRG. 20884. 2 | 729  | 0. 46161 | 9. 18170166  | 1  |
| MSTRG. 20884. 3 | 1018 | 0. 46368 | 6. 242980957 | 1  |
| MSTRG. 20884. 4 | 430  | 0. 43258 | 4. 50970459  | 1  |
| MSTRG. 20891. 1 | 173  | 0. 29712 | 8. 213928223 | 1  |
| MSTRG. 20891. 2 | 137  | 0. 27763 | 6. 685852051 | 1  |
| MSTRG. 20891. 3 | 137  | 0. 28218 | 6. 685852051 | 1  |
| MSTRG. 20892. 1 | 183  | 0. 30624 | 10. 2333374  | 1  |
| MSTRG. 20895. 1 | 163  | 0. 36356 | 9. 852111816 | 1  |
| MSTRG. 20900. 4 | 383  | 0. 43192 | 9. 075622559 | 1  |
| MSTRG. 20900. 3 | 384  | 0. 38228 | 9. 075622559 | 1  |
| MSTRG. 20912. 2 | 188  | 0. 30813 | 5. 854919434 | 1  |
| MSTRG. 20913. 3 | 1937 | 0. 4559  | 5. 962463379 | 1  |
| MSTRG. 20913. 4 | 1934 | 0. 40867 | 6. 046325684 | 1  |
| MSTRG. 20913. 5 | 2043 | 0. 45508 | 5. 980773926 | 1  |
| MSTRG. 20915. 1 | 85   | 0. 36477 | 7. 776794434 | 1  |

|                  |      |          |              |    |
|------------------|------|----------|--------------|----|
| MSTRG. 20919. 1  | 730  | 0. 45131 | 8. 74395752  | 1  |
| MSTRG. 20914. 1  | 52   | 0. 39146 | 9. 843200684 | 1  |
| MSTRG. 20914. 2  | 31   | 0. 40836 | 9. 496276855 | 1  |
| MSTRG. 20914. 3  | 24   | 0. 39006 | 6. 495788574 | 1  |
| MSTRG. 20923. 1  | 14   | 0. 41509 | 12. 00006104 | 1  |
| MSTRG. 20921. 1  | 103  | 0. 38441 | 7. 057312012 | 1  |
| MSTRG. 20921. 2  | 78   | 0. 31402 | 9. 81072998  | 1  |
| MSTRG. 20932. 2  | 234  | 0. 34093 | 5. 175964355 | 1  |
| MSTRG. 20934. 1  | 69   | 0. 43081 | 8. 508239746 | -1 |
| MSTRG. 20930. 1  | 458  | 0. 44423 | 6. 77557373  | 1  |
| MSTRG. 20943. 1  | 149  | 0. 32558 | 9. 800842285 | 1  |
| MSTRG. 20944. 1  | 136  | 0. 31479 | 10. 96380615 | 1  |
| MSTRG. 20940. 1  | 59   | 0. 30829 | 8. 528015137 | -1 |
| MSTRG. 20949. 2  | 615  | 0. 4312  | 5. 53326416  | 1  |
| MSTRG. 20951. 1  | 324  | 0. 4382  | 9. 964782715 | 1  |
| MSTRG. 20952. 2  | 196  | 0. 38779 | 9. 471252441 | 1  |
| MSTRG. 20953. 4  | 276  | 0. 29747 | 8. 850646973 | 1  |
| MSTRG. 20953. 2  | 205  | 0. 30981 | 7. 742370605 | 1  |
| MSTRG. 20953. 5  | 109  | 0. 30557 | 5. 419372559 | 1  |
| MSTRG. 20950. 2  | 729  | 0. 46115 | 7. 506286621 | 1  |
| MSTRG. 20955. 3  | 405  | 0. 42135 | 4. 684143066 | 1  |
| MSTRG. 20955. 5  | 409  | 0. 40037 | 4. 658874512 | 1  |
| MSTRG. 20955. 4  | 409  | 0. 3906  | 4. 658874512 | 1  |
| MSTRG. 20955. 1  | 405  | 0. 4573  | 4. 684143066 | 1  |
| MSTRG. 20957. 1  | 97   | 0. 29357 | 10. 0112915  | -1 |
| MSTRG. 20959. 1  | 15   | 0. 43351 | 7. 83404541  | 1  |
| MSTRG. 20967. 3  | 405  | 0. 36022 | 8. 469543457 | 1  |
| MSTRG. 20967. 7  | 405  | 0. 36022 | 8. 469543457 | 1  |
| MSTRG. 20967. 9  | 1112 | 0. 45595 | 5. 550842285 | 1  |
| MSTRG. 20967. 10 | 1112 | 0. 45991 | 5. 550842285 | 1  |
| MSTRG. 20967. 8  | 1112 | 0. 45991 | 5. 550842285 | 1  |
| MSTRG. 20967. 11 | 747  | 0. 42454 | 5. 33782959  | 1  |
| MSTRG. 20967. 13 | 747  | 0. 45036 | 5. 33782959  | 1  |
| MSTRG. 20967. 14 | 747  | 0. 45969 | 5. 33782959  | 1  |
| MSTRG. 20969. 2  | 89   | 0. 42852 | 4. 072570801 | 1  |
| MSTRG. 20963. 4  | 821  | 0. 3974  | 8. 413513184 | 1  |
| MSTRG. 20963. 5  | 817  | 0. 3974  | 8. 413513184 | 1  |
| MSTRG. 20963. 8  | 955  | 0. 45859 | 8. 293640137 | 1  |
| MSTRG. 20963. 6  | 959  | 0. 41023 | 8. 293640137 | 1  |
| MSTRG. 20975. 2  | 142  | 0. 39648 | 10. 64227295 | 1  |
| MSTRG. 20979. 2  | 643  | 0. 39191 | 7. 240539551 | 1  |
| MSTRG. 20981. 2  | 570  | 0. 46507 | 8. 132263184 | 1  |
| MSTRG. 20977. 2  | 191  | 0. 36085 | 8. 588684082 | 1  |
| MSTRG. 20978. 1  | 355  | 0. 45617 | 4. 791442871 | 1  |
| MSTRG. 20978. 3  | 355  | 0. 32574 | 4. 791442871 | 1  |
| MSTRG. 20986. 2  | 406  | 0. 42765 | 8. 531311035 | 1  |
| MSTRG. 20986. 5  | 566  | 0. 43107 | 8. 751037598 | 1  |
| MSTRG. 20986. 1  | 557  | 0. 41997 | 8. 871032715 | 1  |
| MSTRG. 20986. 3  | 557  | 0. 42765 | 8. 871032715 | 1  |
| MSTRG. 20986. 7  | 406  | 0. 42305 | 8. 531311035 | 1  |
| MSTRG. 20986. 8  | 589  | 0. 41651 | 8. 871643066 | 1  |
| MSTRG. 20989. 1  | 249  | 0. 40548 | 9. 008728027 | 1  |
| MSTRG. 20990. 1  | 47   | 0. 3556  | 9. 49029541  | 1  |
| MSTRG. 20990. 2  | 103  | 0. 39576 | 9. 179138184 | 1  |

|                 |      |          |              |    |
|-----------------|------|----------|--------------|----|
| MSTRG. 20994. 3 | 2026 | 0. 35912 | 5. 838806152 | 1  |
| MSTRG. 20999. 2 | 2328 | 0. 4514  | 6. 820617676 | 1  |
| MSTRG. 20999. 3 | 1993 | 0. 45041 | 6. 206115723 | 1  |
| MSTRG. 21000. 1 | 65   | 0. 39898 | 8. 841491699 | 1  |
| MSTRG. 21002. 1 | 152  | 0. 30553 | 10. 13873291 | 1  |
| MSTRG. 21011. 4 | 802  | 0. 48044 | 6. 004577637 | 1  |
| MSTRG. 21017. 1 | 35   | 0. 42583 | 3. 905334473 | 1  |
| MSTRG. 21018. 1 | 415  | 0. 40726 | 6. 63092041  | 1  |
| MSTRG. 21018. 2 | 414  | 0. 40726 | 6. 310852051 | 1  |
| MSTRG. 21018. 3 | 323  | 0. 4369  | 8. 340026855 | -1 |
| MSTRG. 21024. 5 | 1645 | 0. 36388 | 8. 31036377  | 1  |
| MSTRG. 21024. 6 | 1458 | 0. 36202 | 8. 008605957 | 1  |
| MSTRG. 21024. 7 | 1659 | 0. 36464 | 8. 301818848 | 1  |
| MSTRG. 21022. 1 | 35   | 0. 43296 | 6. 507141113 | 1  |
| MSTRG. 21027. 4 | 478  | 0. 42689 | 6. 202087402 | 1  |
| MSTRG. 21027. 6 | 478  | 0. 43154 | 6. 202087402 | 1  |
| MSTRG. 21027. 5 | 544  | 0. 46074 | 6. 16217041  | 1  |
| MSTRG. 21027. 8 | 478  | 0. 46193 | 6. 202087402 | 1  |
| MSTRG. 21037. 2 | 149  | 0. 34268 | 5. 526672363 | 1  |
| MSTRG. 21038. 2 | 1126 | 0. 40005 | 8. 510192871 | 1  |
| MSTRG. 21038. 5 | 168  | 0. 34141 | 8. 91607666  | 1  |
| MSTRG. 21038. 6 | 267  | 0. 2908  | 5. 315979004 | 1  |
| MSTRG. 21039. 2 | 261  | 0. 39748 | 4. 59197998  | 1  |
| MSTRG. 21048. 3 | 1124 | 0. 35836 | 6. 753356934 | 1  |
| MSTRG. 21048. 5 | 1124 | 0. 46761 | 6. 753356934 | 1  |
| MSTRG. 21049. 2 | 245  | 0. 28923 | 8. 57208252  | 1  |
| MSTRG. 21061. 1 | 1051 | 0. 40125 | 5. 292297363 | 1  |
| MSTRG. 21061. 2 | 815  | 0. 33902 | 5. 214172363 | 1  |
| MSTRG. 21062. 1 | 158  | 0. 43589 | 9. 051696777 | 1  |
| MSTRG. 21061. 3 | 623  | 0. 47442 | 5. 132263184 | 1  |
| MSTRG. 21066. 1 | 189  | 0. 47759 | 8. 648620605 | 1  |
| MSTRG. 21068. 3 | 615  | 0. 4149  | 6. 41607666  | 1  |
| MSTRG. 21074. 1 | 278  | 0. 33573 | 10. 00592041 | 1  |
| MSTRG. 21076. 4 | 196  | 0. 45928 | 8. 547546387 | 1  |
| MSTRG. 21079. 1 | 74   | 0. 37736 | 5. 327819824 | 1  |
| MSTRG. 21080. 3 | 557  | 0. 3208  | 8. 023742676 | 1  |
| MSTRG. 21080. 4 | 71   | 0. 48264 | 4. 412414551 | 1  |
| MSTRG. 21082. 1 | 33   | 0. 33399 | 9. 489562988 | 1  |
| MSTRG. 21083. 1 | 120  | 0. 26189 | 10. 54779053 | 1  |
| MSTRG. 21086. 1 | 48   | 0. 38293 | 6. 803894043 | 1  |
| MSTRG. 21087. 3 | 345  | 0. 32561 | 8. 729919434 | 1  |
| MSTRG. 21090. 1 | 210  | 0. 45618 | 9. 656188965 | 1  |
| MSTRG. 21089. 3 | 148  | 0. 35461 | 5. 803039551 | 1  |
| MSTRG. 21096. 4 | 513  | 0. 39466 | 9. 077087402 | 1  |
| MSTRG. 21092. 2 | 294  | 0. 33747 | 8. 730651855 | 1  |
| MSTRG. 21093. 3 | 1039 | 0. 449   | 6. 204772949 | 1  |
| MSTRG. 21104. 3 | 469  | 0. 38051 | 4. 991882324 | 1  |
| MSTRG. 21104. 4 | 469  | 0. 433   | 4. 991882324 | 1  |
| MSTRG. 21105. 1 | 53   | 0. 3713  | 7. 847106934 | 1  |
| MSTRG. 21106. 5 | 444  | 0. 29776 | 5. 447814941 | 1  |
| MSTRG. 21106. 7 | 585  | 0. 379   | 6. 399963379 | 1  |
| MSTRG. 21106. 6 | 600  | 0. 379   | 6. 254699707 | 1  |
| MSTRG. 21106. 2 | 413  | 0. 34696 | 5. 420349121 | 1  |
| MSTRG. 21106. 4 | 413  | 0. 29776 | 5. 420349121 | 1  |



|                  |      |          |              |    |
|------------------|------|----------|--------------|----|
| MSTRG. 21106. 8  | 413  | 0. 38211 | 5. 420349121 | 1  |
| MSTRG. 21106. 9  | 451  | 0. 38444 | 5. 643859863 | 1  |
| MSTRG. 21106. 10 | 428  | 0. 35961 | 5. 34552002  | 1  |
| MSTRG. 21106. 11 | 398  | 0. 36366 | 5. 339782715 | 1  |
| MSTRG. 21101. 3  | 219  | 0. 34775 | 5. 593078613 | 1  |
| MSTRG. 21098. 1  | 92   | 0. 28948 | 8. 816467285 | 1  |
| MSTRG. 21102. 2  | 225  | 0. 46923 | 5. 137390137 | 1  |
| MSTRG. 21107. 2  | 342  | 0. 32413 | 7. 038146973 | 1  |
| MSTRG. 21107. 3  | 669  | 0. 45239 | 8. 61932373  | 1  |
| MSTRG. 21108. 1  | 156  | 0. 3351  | 10. 00372314 | 1  |
| MSTRG. 21109. 1  | 115  | 0. 31852 | 10. 88446045 | 1  |
| MSTRG. 21107. 4  | 342  | 0. 42507 | 7. 038146973 | 1  |
| MSTRG. 21111. 2  | 1040 | 0. 37761 | 8. 679504395 | 1  |
| MSTRG. 21112. 1  | 154  | 0. 30121 | 5. 040100098 | 1  |
| MSTRG. 21112. 2  | 128  | 0. 30121 | 7. 742004395 | 1  |
| MSTRG. 21115. 1  | 38   | 0. 34196 | 9. 836975098 | 1  |
| MSTRG. 21117. 1  | 28   | 0. 48755 | 10. 43267822 | 1  |
| MSTRG. 21120. 1  | 44   | 0. 36076 | 9. 773132324 | -1 |
| MSTRG. 21126. 2  | 723  | 0. 43801 | 6. 329650879 | 1  |
| MSTRG. 21123. 1  | 107  | 0. 35407 | 10. 13885498 | 1  |
| MSTRG. 21130. 3  | 244  | 0. 33475 | 4. 983947754 | 1  |
| MSTRG. 21127. 1  | 1608 | 0. 4016  | 5. 00604248  | 1  |
| MSTRG. 21127. 2  | 1594 | 0. 4016  | 5. 011779785 | 1  |
| MSTRG. 21128. 1  | 48   | 0. 34952 | 10. 94000244 | 1  |
| MSTRG. 21146. 3  | 239  | 0. 41567 | 5. 502502441 | 1  |
| MSTRG. 21147. 1  | 71   | 0. 46736 | 8. 804870605 | 1  |
| MSTRG. 21146. 4  | 377  | 0. 43668 | 8. 942321777 | 1  |
| MSTRG. 21146. 6  | 367  | 0. 42924 | 8. 736755371 | 1  |
| MSTRG. 21146. 5  | 307  | 0. 31518 | 6. 82220459  | 1  |
| MSTRG. 21146. 7  | 348  | 0. 44258 | 7. 195739746 | 1  |
| MSTRG. 21146. 8  | 186  | 0. 43912 | 5. 548522949 | 1  |
| MSTRG. 21146. 9  | 182  | 0. 29607 | 10. 13519287 | 1  |
| MSTRG. 21146. 10 | 153  | 0. 33423 | 10. 20977783 | 1  |
| MSTRG. 21146. 11 | 108  | 0. 29772 | 4. 999328613 | 1  |
| MSTRG. 21146. 12 | 108  | 0. 39243 | 4. 999328613 | 1  |
| MSTRG. 21148. 10 | 1072 | 0. 44408 | 8. 569885254 | 1  |
| MSTRG. 21148. 12 | 1073 | 0. 44203 | 8. 572814941 | 1  |
| MSTRG. 21148. 6  | 1101 | 0. 44261 | 8. 709289551 | 1  |
| MSTRG. 21148. 8  | 756  | 0. 42172 | 7. 744812012 | 1  |
| MSTRG. 21148. 9  | 1151 | 0. 43757 | 8. 244689941 | 1  |
| MSTRG. 21134. 1  | 304  | 0. 47439 | 5. 637878418 | 1  |
| MSTRG. 21151. 1  | 138  | 0. 27327 | 9. 543884277 | 1  |
| MSTRG. 21152. 1  | 931  | 0. 44712 | 4. 766052246 | 1  |
| MSTRG. 21153. 1  | 933  | 0. 42427 | 4. 649597168 | 1  |
| MSTRG. 21154. 1  | 277  | 0. 34159 | 9. 873596191 | 1  |
| MSTRG. 21154. 2  | 243  | 0. 44166 | 9. 035827637 | -1 |
| MSTRG. 21155. 1  | 77   | 0. 33531 | 5. 563293457 | 1  |
| MSTRG. 21156. 2  | 336  | 0. 39192 | 6. 383483887 | 1  |
| MSTRG. 21154. 3  | 159  | 0. 42059 | 7. 77911377  | 1  |
| MSTRG. 21154. 4  | 580  | 0. 36239 | 9. 189758301 | 1  |
| MSTRG. 21159. 3  | 575  | 0. 44808 | 8. 756652832 | 1  |
| MSTRG. 21159. 4  | 596  | 0. 38922 | 8. 954162598 | 1  |
| MSTRG. 21159. 5  | 596  | 0. 40643 | 8. 954162598 | 1  |
| MSTRG. 21159. 6  | 532  | 0. 44032 | 8. 754943848 | 1  |

|                |      |         |             |    |
|----------------|------|---------|-------------|----|
| MSTRG. 21159.7 | 69   | 0.3484  | 6.698181152 | 1  |
| MSTRG. 21162.6 | 424  | 0.43527 | 5.585144043 | 1  |
| MSTRG. 21162.7 | 553  | 0.44655 | 5.432434082 | 1  |
| MSTRG. 21163.1 | 43   | 0.44264 | 7.976257324 | 1  |
| MSTRG. 21163.2 | 83   | 0.33187 | 9.687316895 | 1  |
| MSTRG. 21173.1 | 3143 | 0.44648 | 6.019226074 | 1  |
| MSTRG. 21169.1 | 58   | 0.31205 | 9.099914551 | 1  |
| MSTRG. 21176.1 | 25   | 0.46103 | 5.968444824 | 1  |
| MSTRG. 21176.2 | 25   | 0.36153 | 5.968444824 | 1  |
| MSTRG. 21179.3 | 3077 | 0.46674 | 4.995300293 | 1  |
| MSTRG. 21179.2 | 3077 | 0.46674 | 4.987121582 | 1  |
| MSTRG. 21179.5 | 3077 | 0.47444 | 4.987121582 | 1  |
| MSTRG. 21179.6 | 3077 | 0.46674 | 4.994689941 | 1  |
| MSTRG. 21181.2 | 1190 | 0.37781 | 8.373352051 | 1  |
| MSTRG. 21198.1 | 355  | 0.46146 | 10.09698486 | 1  |
| MSTRG. 21198.2 | 147  | 0.34583 | 10.45330811 | 1  |
| MSTRG. 21198.3 | 311  | 0.36466 | 10.19781494 | 1  |
| MSTRG. 21212.1 | 730  | 0.38695 | 8.968200684 | 1  |
| MSTRG. 21212.2 | 373  | 0.3582  | 8.257751465 | 1  |
| MSTRG. 21213.2 | 308  | 0.37244 | 7.047180176 | 1  |
| MSTRG. 21216.2 | 232  | 0.31418 | 4.649719238 | 1  |
| MSTRG. 21218.2 | 107  | 0.33767 | 5.437438965 | 1  |
| MSTRG. 21218.3 | 96   | 0.38511 | 7.756530762 | 1  |
| MSTRG. 21220.3 | 307  | 0.43136 | 7.188293457 | 1  |
| MSTRG. 21220.4 | 64   | 0.2921  | 9.167785645 | 1  |
| MSTRG. 21224.1 | 59   | 0.36286 | 8.617614746 | 1  |
| MSTRG. 21235.3 | 725  | 0.45997 | 5.799133301 | 1  |
| MSTRG. 21234.1 | 44   | 0.39633 | 5.617858887 | 1  |
| MSTRG. 21244.1 | 51   | 0.37712 | 6.809265137 | 1  |
| MSTRG. 21248.2 | 19   | 0.34907 | 11.69903564 | 1  |
| MSTRG. 21249.1 | 116  | 0.28855 | 9.453186035 | 1  |
| MSTRG. 21250.2 | 326  | 0.41507 | 6.355773926 | 1  |
| MSTRG. 21251.1 | 92   | 0.38023 | 8.906188965 | 1  |
| MSTRG. 21251.2 | 83   | 0.39307 | 7.979309082 | 1  |
| MSTRG. 21252.1 | 116  | 0.30753 | 10.37335205 | 1  |
| MSTRG. 21252.2 | 116  | 0.27883 | 10.37335205 | 1  |
| MSTRG. 21254.1 | 80   | 0.30055 | 8.934509277 | 1  |
| MSTRG. 21256.5 | 401  | 0.38012 | 8.012512207 | 1  |
| MSTRG. 21256.6 | 369  | 0.47113 | 6.097595215 | 1  |
| MSTRG. 21257.1 | 71   | 0.35159 | 8.80279541  | 1  |
| MSTRG. 21260.1 | 372  | 0.40786 | 5.571838379 | 1  |
| MSTRG. 21262.1 | 60   | 0.39613 | 9.512268066 | 1  |
| MSTRG. 21268.1 | 62   | 0.29628 | 6.699645996 | 1  |
| MSTRG. 21269.1 | 1049 | 0.33655 | 5.492614746 | 1  |
| MSTRG. 21269.2 | 65   | 0.37651 | 4.426940918 | 1  |
| MSTRG. 21271.2 | 559  | 0.35697 | 6.105773926 | 1  |
| MSTRG. 21272.1 | 59   | 0.35843 | 9.099060059 | -1 |
| MSTRG. 21278.2 | 100  | 0.375   | 5.22479248  | 1  |
| MSTRG. 21301.3 | 903  | 0.4256  | 8.806335449 | 1  |
| MSTRG. 21302.1 | 188  | 0.28567 | 9.944152832 | 1  |
| MSTRG. 21308.1 | 502  | 0.37611 | 4.929992676 | 1  |
| MSTRG. 21309.2 | 1038 | 0.45889 | 6.496643066 | 1  |
| MSTRG. 21310.3 | 620  | 0.4418  | 8.153869629 | 1  |
| MSTRG. 21315.2 | 1448 | 0.42046 | 6.725891113 | 1  |

|                  |      |          |              |    |
|------------------|------|----------|--------------|----|
| MSTRG. 21316. 1  | 183  | 0. 33636 | 10. 62164307 | 1  |
| MSTRG. 21317. 1  | 60   | 0. 31639 | 9. 032897949 | 1  |
| MSTRG. 21318. 1  | 110  | 0. 35472 | 5. 998596191 | 1  |
| MSTRG. 21315. 4  | 169  | 0. 38274 | 9. 098083496 | 1  |
| MSTRG. 21314. 1  | 385  | 0. 41679 | 7. 575134277 | -1 |
| MSTRG. 21319. 1  | 858  | 0. 44516 | 6. 842468262 | 1  |
| MSTRG. 21323. 1  | 1619 | 0. 43524 | 6. 575500488 | 1  |
| MSTRG. 21323. 5  | 1568 | 0. 46379 | 6. 643615723 | 1  |
| MSTRG. 21323. 3  | 1616 | 0. 46379 | 6. 644714355 | 1  |
| MSTRG. 21323. 8  | 1581 | 0. 42896 | 6. 452941895 | 1  |
| MSTRG. 21323. 7  | 1616 | 0. 43454 | 6. 644714355 | 1  |
| MSTRG. 21323. 9  | 1619 | 0. 42896 | 6. 575500488 | 1  |
| MSTRG. 21321. 1  | 1337 | 0. 45953 | 5. 719177246 | 1  |
| MSTRG. 21321. 2  | 1320 | 0. 44518 | 5. 684387207 | 1  |
| MSTRG. 21321. 3  | 1276 | 0. 42098 | 5. 63848877  | 1  |
| MSTRG. 21324. 2  | 604  | 0. 37926 | 9. 005065918 | 1  |
| MSTRG. 21324. 3  | 604  | 0. 37117 | 9. 005065918 | 1  |
| MSTRG. 21326. 1  | 150  | 0. 30992 | 5. 50201416  | 1  |
| MSTRG. 21327. 3  | 375  | 0. 45736 | 6. 701843262 | 1  |
| MSTRG. 21327. 6  | 375  | 0. 39915 | 6. 701843262 | 1  |
| MSTRG. 21327. 8  | 297  | 0. 40585 | 7. 384216309 | 1  |
| MSTRG. 21330. 2  | 159  | 0. 4351  | 8. 59576416  | -1 |
| MSTRG. 21333. 4  | 419  | 0. 42214 | 8. 76776123  | 1  |
| MSTRG. 21334. 5  | 1272 | 0. 4426  | 5. 667541504 | 1  |
| MSTRG. 21334. 6  | 1386 | 0. 43795 | 5. 987121582 | 1  |
| MSTRG. 21334. 7  | 1386 | 0. 44047 | 5. 987121582 | 1  |
| MSTRG. 21334. 8  | 1386 | 0. 40702 | 5. 987121582 | 1  |
| MSTRG. 21334. 9  | 1386 | 0. 40702 | 5. 987121582 | 1  |
| MSTRG. 21334. 10 | 1341 | 0. 40537 | 5. 816101074 | 1  |
| MSTRG. 21335. 1  | 114  | 0. 2921  | 6. 379455566 | 1  |
| MSTRG. 21336. 1  | 122  | 0. 37942 | 9. 010925293 | 1  |
| MSTRG. 21336. 2  | 122  | 0. 36357 | 9. 010925293 | 1  |
| MSTRG. 21336. 3  | 122  | 0. 35501 | 9. 010925293 | 1  |
| MSTRG. 21338. 4  | 206  | 0. 2689  | 9. 515930176 | 1  |
| MSTRG. 21338. 6  | 202  | 0. 32188 | 8. 683044434 | 1  |
| MSTRG. 21338. 7  | 761  | 0. 33965 | 6. 532775879 | 1  |
| MSTRG. 21338. 9  | 102  | 0. 35247 | 6. 515075684 | 1  |
| MSTRG. 21338. 10 | 144  | 0. 30424 | 9. 53704834  | 1  |
| MSTRG. 21338. 13 | 406  | 0. 36075 | 6. 03314209  | 1  |
| MSTRG. 21338. 12 | 572  | 0. 44177 | 5. 50177002  | 1  |
| MSTRG. 21342. 1  | 195  | 0. 32917 | 6. 69354248  | 1  |
| MSTRG. 21343. 3  | 195  | 0. 4144  | 8. 413513184 | 1  |
| MSTRG. 21348. 4  | 1709 | 0. 39003 | 6. 328063965 | 1  |
| MSTRG. 21348. 1  | 1716 | 0. 39558 | 6. 261779785 | 1  |
| MSTRG. 21348. 2  | 1717 | 0. 39558 | 6. 294616699 | 1  |
| MSTRG. 21349. 1  | 339  | 0. 40637 | 6. 277038574 | 1  |
| MSTRG. 21351. 1  | 27   | 0. 38599 | 11. 69903564 | 1  |
| MSTRG. 21345. 1  | 133  | 0. 34883 | 8. 878967285 | 1  |
| MSTRG. 21371. 3  | 1011 | 0. 43793 | 4. 643005371 | 1  |
| MSTRG. 21371. 5  | 503  | 0. 4678  | 4. 450866699 | 1  |
| MSTRG. 21371. 4  | 1599 | 0. 42059 | 7. 61932373  | 1  |
| MSTRG. 21371. 6  | 503  | 0. 39954 | 4. 450866699 | 1  |
| MSTRG. 21371. 7  | 551  | 0. 45897 | 5. 07989502  | 1  |
| MSTRG. 21371. 9  | 1474 | 0. 41894 | 8. 851257324 | 1  |

|                  |      |          |              |    |
|------------------|------|----------|--------------|----|
| MSTRG. 21371. 10 | 1599 | 0. 41439 | 7. 61932373  | 1  |
| MSTRG. 21371. 11 | 1594 | 0. 40519 | 7. 816589355 | 1  |
| MSTRG. 21371. 13 | 1591 | 0. 41274 | 7. 987976074 | 1  |
| MSTRG. 21371. 12 | 1591 | 0. 42059 | 7. 987976074 | 1  |
| MSTRG. 21371. 15 | 1594 | 0. 41894 | 7. 816589355 | 1  |
| MSTRG. 21371. 16 | 1594 | 0. 41274 | 7. 816589355 | 1  |
| MSTRG. 21371. 17 | 1482 | 0. 41894 | 8. 763000488 | 1  |
| MSTRG. 21371. 18 | 1591 | 0. 43142 | 7. 987976074 | 1  |
| MSTRG. 21372. 1  | 283  | 0. 28832 | 6. 339660645 | 1  |
| MSTRG. 21373. 1  | 135  | 0. 34145 | 12. 25689697 | 1  |
| MSTRG. 21372. 2  | 270  | 0. 27586 | 8. 496520996 | 1  |
| MSTRG. 21356. 1  | 283  | 0. 40681 | 5. 27947998  | 1  |
| MSTRG. 21359. 1  | 118  | 0. 34107 | 5. 90020752  | 1  |
| MSTRG. 21361. 1  | 223  | 0. 37565 | 4. 703552246 | 1  |
| MSTRG. 21362. 1  | 59   | 0. 40282 | 5. 114562988 | 1  |
| MSTRG. 21363. 1  | 265  | 0. 38837 | 7. 704162598 | 1  |
| MSTRG. 21368. 2  | 356  | 0. 37428 | 8. 880187988 | 1  |
| MSTRG. 21368. 3  | 356  | 0. 3755  | 8. 880187988 | 1  |
| MSTRG. 21369. 1  | 69   | 0. 28929 | 6. 802185059 | 1  |
| MSTRG. 21377. 1  | 70   | 0. 3754  | 9. 817565918 | -1 |
| MSTRG. 21375. 1  | 82   | 0. 36914 | 9. 387268066 | -1 |
| MSTRG. 21384. 1  | 44   | 0. 31325 | 9. 513000488 | 1  |
| MSTRG. 21385. 5  | 140  | 0. 31172 | 11. 53814697 | 1  |
| MSTRG. 21385. 4  | 485  | 0. 47401 | 7. 55670166  | 1  |
| MSTRG. 21385. 7  | 140  | 0. 29343 | 11. 53814697 | 1  |
| MSTRG. 21385. 8  | 69   | 0. 39363 | 6. 144348145 | 1  |
| MSTRG. 21385. 9  | 504  | 0. 37524 | 7. 90814209  | 1  |
| MSTRG. 21385. 10 | 146  | 0. 36095 | 9. 865539551 | -1 |
| MSTRG. 21395. 3  | 194  | 0. 43777 | 8. 893615723 | 1  |
| MSTRG. 21396. 3  | 744  | 0. 41109 | 6. 414978027 | 1  |
| MSTRG. 21396. 4  | 744  | 0. 45109 | 6. 414978027 | 1  |
| MSTRG. 21406. 1  | 88   | 0. 28002 | 6. 808898926 | 1  |
| MSTRG. 21406. 2  | 54   | 0. 31742 | 8. 933898926 | 1  |
| MSTRG. 21400. 1  | 54   | 0. 34371 | 11. 58099365 | 1  |
| MSTRG. 21402. 1  | 60   | 0. 36252 | 5. 668029785 | 1  |
| MSTRG. 21403. 1  | 59   | 0. 30285 | 6. 812683105 | 1  |
| MSTRG. 21414. 1  | 60   | 0. 33471 | 9. 857971191 | 1  |
| MSTRG. 21415. 1  | 118  | 0. 29793 | 8. 157775879 | 1  |
| MSTRG. 21416. 1  | 129  | 0. 30121 | 11. 45855713 | 1  |
| MSTRG. 21433. 1  | 1065 | 0. 36153 | 8. 739318848 | 1  |
| MSTRG. 21433. 4  | 786  | 0. 40576 | 8. 619934082 | 1  |
| MSTRG. 21433. 3  | 786  | 0. 34103 | 8. 619934082 | 1  |
| MSTRG. 21433. 5  | 786  | 0. 37771 | 8. 619934082 | 1  |
| MSTRG. 21433. 6  | 786  | 0. 28243 | 8. 619934082 | 1  |
| MSTRG. 21433. 7  | 786  | 0. 38321 | 8. 619934082 | 1  |
| MSTRG. 21433. 8  | 786  | 0. 36706 | 8. 619934082 | 1  |
| MSTRG. 21433. 9  | 290  | 0. 29607 | 7. 95501709  | 1  |
| MSTRG. 21434. 1  | 109  | 0. 43457 | 5. 153259277 | 1  |
| MSTRG. 21433. 10 | 786  | 0. 34103 | 8. 619934082 | 1  |
| MSTRG. 21433. 11 | 378  | 0. 29772 | 9. 478942871 | 1  |
| MSTRG. 21433. 13 | 786  | 0. 40576 | 8. 619934082 | 1  |
| MSTRG. 21433. 14 | 786  | 0. 42116 | 8. 619934082 | 1  |
| MSTRG. 21433. 15 | 786  | 0. 40576 | 8. 619934082 | 1  |
| MSTRG. 21433. 16 | 786  | 0. 42116 | 8. 619934082 | 1  |

|                  |      |          |              |    |
|------------------|------|----------|--------------|----|
| MSTRG. 21433. 18 | 786  | 0. 43502 | 8. 619934082 | 1  |
| MSTRG. 21433. 19 | 310  | 0. 36347 | 9. 819763184 | 1  |
| MSTRG. 21433. 20 | 1030 | 0. 36935 | 8. 675842285 | 1  |
| MSTRG. 21433. 22 | 96   | 0. 33345 | 10. 55145264 | 1  |
| MSTRG. 21441. 2  | 214  | 0. 47319 | 9. 88848877  | 1  |
| MSTRG. 21419. 1  | 2852 | 0. 46336 | 5. 261413574 | 1  |
| MSTRG. 21425. 1  | 33   | 0. 4494  | 9. 186218262 | 1  |
| MSTRG. 21427. 2  | 251  | 0. 41056 | 9. 77154541  | 1  |
| MSTRG. 21427. 1  | 496  | 0. 40638 | 9. 99810791  | 1  |
| MSTRG. 21428. 1  | 30   | 0. 40738 | 11. 33087158 | 1  |
| MSTRG. 21429. 1  | 45   | 0. 36455 | 6. 810974121 | 1  |
| MSTRG. 21432. 1  | 147  | 0. 46081 | 11. 25811768 | 1  |
| MSTRG. 21449. 1  | 785  | 0. 33623 | 7. 07611084  | 1  |
| MSTRG. 21449. 4  | 606  | 0. 4382  | 8. 034118652 | -1 |
| MSTRG. 21450. 1  | 150  | 0. 28883 | 5. 941101074 | 1  |
| MSTRG. 21450. 2  | 102  | 0. 3271  | 9. 658996582 | 1  |
| MSTRG. 21451. 1  | 89   | 0. 27713 | 6. 555114746 | 1  |
| MSTRG. 21449. 5  | 94   | 0. 27763 | 4. 690856934 | 1  |
| MSTRG. 21452. 1  | 214  | 0. 29751 | 9. 445495605 | 1  |
| MSTRG. 21453. 1  | 172  | 0. 29187 | 9. 806945801 | 1  |
| MSTRG. 21454. 1  | 162  | 0. 27863 | 10. 01617432 | 1  |
| MSTRG. 21454. 2  | 98   | 0. 29356 | 5. 774230957 | 1  |
| MSTRG. 21446. 2  | 490  | 0. 43415 | 4. 746765137 | 1  |
| MSTRG. 21447. 4  | 220  | 0. 35804 | 4. 977844238 | 1  |
| MSTRG. 21447. 2  | 220  | 0. 41549 | 4. 977844238 | 1  |
| MSTRG. 21471. 1  | 1081 | 0. 4216  | 6. 385192871 | 1  |
| MSTRG. 21471. 3  | 508  | 0. 36143 | 5. 94708252  | 1  |
| MSTRG. 21472. 1  | 60   | 0. 38933 | 11. 36297607 | -1 |
| MSTRG. 21470. 3  | 130  | 0. 35269 | 9. 24786377  | 1  |
| MSTRG. 21474. 3  | 289  | 0. 46234 | 8. 819274902 | 1  |
| MSTRG. 21484. 4  | 724  | 0. 33006 | 5. 89239502  | 1  |
| MSTRG. 21486. 2  | 260  | 0. 41286 | 9. 278015137 | 1  |
| MSTRG. 21502. 2  | 591  | 0. 30132 | 5. 506164551 | 1  |
| MSTRG. 21502. 7  | 485  | 0. 34755 | 6. 039123535 | 1  |
| MSTRG. 21502. 4  | 455  | 0. 33711 | 5. 55279541  | 1  |
| MSTRG. 21502. 6  | 591  | 0. 36698 | 5. 506164551 | 1  |
| MSTRG. 21502. 5  | 591  | 0. 31081 | 5. 506164551 | 1  |
| MSTRG. 21503. 1  | 67   | 0. 37466 | 6. 042663574 | 1  |
| MSTRG. 21511. 1  | 84   | 0. 34967 | 9. 695251465 | 1  |
| MSTRG. 21520. 1  | 90   | 0. 33422 | 11. 48028564 | 1  |
| MSTRG. 21526. 1  | 75   | 0. 37468 | 4. 508605957 | 1  |
| MSTRG. 21533. 1  | 30   | 0. 41651 | 9. 700744629 | 1  |
| MSTRG. 21534. 1  | 80   | 0. 4497  | 10. 37542725 | -1 |
| MSTRG. 21532. 2  | 607  | 0. 4677  | 5. 425231934 | 1  |
| MSTRG. 21535. 1  | 186  | 0. 29687 | 8. 734558105 | 1  |
| MSTRG. 21532. 3  | 156  | 0. 32082 | 4. 982971191 | 1  |
| MSTRG. 21536. 1  | 42   | 0. 42024 | 4. 796081543 | 1  |
| MSTRG. 21537. 1  | 199  | 0. 36942 | 10. 1987915  | 1  |
| MSTRG. 21532. 4  | 109  | 0. 2831  | 8. 867492676 | 1  |
| MSTRG. 21538. 1  | 128  | 0. 29771 | 8. 969299316 | 1  |
| MSTRG. 21499. 2  | 168  | 0. 46471 | 4. 03704834  | 1  |
| MSTRG. 21499. 3  | 168  | 0. 46333 | 4. 03704834  | 1  |
| MSTRG. 21552. 1  | 107  | 0. 29187 | 9. 097473145 | 1  |
| MSTRG. 21553. 1  | 250  | 0. 29526 | 9. 636047363 | 1  |

|                  |      |          |              |    |
|------------------|------|----------|--------------|----|
| MSTRG. 21555. 1  | 77   | 0. 28338 | 6. 233215332 | 1  |
| MSTRG. 21556. 1  | 109  | 0. 32477 | 5. 020935059 | 1  |
| MSTRG. 21569. 1  | 76   | 0. 40607 | 9. 989807129 | 1  |
| MSTRG. 21572. 1  | 98   | 0. 4612  | 6. 486633301 | 1  |
| MSTRG. 21572. 2  | 98   | 0. 37591 | 6. 486633301 | 1  |
| MSTRG. 21573. 5  | 503  | 0. 33694 | 9. 459899902 | 1  |
| MSTRG. 21573. 6  | 594  | 0. 47443 | 6. 273376465 | 1  |
| MSTRG. 21573. 7  | 595  | 0. 44809 | 6. 823059082 | 1  |
| MSTRG. 21573. 9  | 607  | 0. 47954 | 6. 596374512 | 1  |
| MSTRG. 21573. 14 | 491  | 0. 43962 | 9. 536193848 | 1  |
| MSTRG. 21575. 1  | 361  | 0. 36898 | 5. 519592285 | 1  |
| MSTRG. 21580. 1  | 103  | 0. 30981 | 9. 592224121 | 1  |
| MSTRG. 21580. 2  | 139  | 0. 36161 | 9. 499450684 | 1  |
| MSTRG. 21580. 3  | 125  | 0. 35235 | 10. 12615967 | 1  |
| MSTRG. 21598. 1  | 88   | 0. 44791 | 6. 805358887 | -1 |
| MSTRG. 21612. 1  | 8    | 0. 45195 | 3. 998840332 | -1 |
| MSTRG. 21649. 1  | 77   | 0. 29435 | 5. 607849121 | 1  |
| MSTRG. 21656. 9  | 535  | 0. 29755 | 5. 121154785 | 1  |
| MSTRG. 21657. 1  | 33   | 0. 37704 | 9. 301940918 | 1  |
| MSTRG. 21670. 1  | 62   | 0. 31454 | 6. 80657959  | 1  |
| MSTRG. 21670. 2  | 25   | 0. 35674 | 9. 992004395 | 1  |
| MSTRG. 21695. 4  | 748  | 0. 45297 | 5. 43572998  | 1  |
| MSTRG. 21696. 1  | 95   | 0. 2727  | 9. 438293457 | 1  |
| MSTRG. 21695. 6  | 819  | 0. 45406 | 5. 347106934 | -1 |
| MSTRG. 21697. 1  | 118  | 0. 31885 | 8. 28302002  | 1  |
| MSTRG. 21695. 7  | 601  | 0. 44264 | 5. 190979004 | 1  |
| MSTRG. 21698. 1  | 66   | 0. 36239 | 9. 951477051 | 1  |
| MSTRG. 21695. 10 | 331  | 0. 45765 | 7. 042541504 | 1  |
| MSTRG. 21708. 1  | 42   | 0. 37836 | 11. 43719482 | -1 |
| MSTRG. 21674. 1  | 78   | 0. 39939 | 10. 81134033 | 1  |
| MSTRG. 21676. 1  | 70   | 0. 36294 | 10. 35736084 | 1  |
| MSTRG. 21680. 1  | 133  | 0. 30905 | 9. 729187012 | 1  |
| MSTRG. 21729. 1  | 58   | 0. 42886 | 5. 086364746 | 1  |
| MSTRG. 21725. 1  | 101  | 0. 41683 | 10. 28094482 | -1 |
| MSTRG. 21739. 1  | 58   | 0. 3137  | 6. 066955566 | 1  |
| MSTRG. 21741. 2  | 40   | 0. 36461 | 6. 111877441 | 1  |
| MSTRG. 21741. 1  | 77   | 0. 38792 | 5. 991027832 | 1  |
| MSTRG. 21749. 1  | 886  | 0. 47214 | 7. 534851074 | 1  |
| MSTRG. 21749. 4  | 774  | 0. 46444 | 6. 76739502  | 1  |
| MSTRG. 21749. 5  | 189  | 0. 32465 | 9. 629577637 | 1  |
| MSTRG. 21749. 6  | 81   | 0. 32237 | 7. 652893066 | 1  |
| MSTRG. 21749. 7  | 49   | 0. 36536 | 5. 604309082 | -1 |
| MSTRG. 21751. 1  | 83   | 0. 31924 | 7. 002380371 | 1  |
| MSTRG. 21752. 1  | 44   | 0. 29895 | 8. 737854004 | 1  |
| MSTRG. 21749. 8  | 101  | 0. 27994 | 8. 330993652 | 1  |
| MSTRG. 21753. 1  | 245  | 0. 28982 | 9. 702575684 | 1  |
| MSTRG. 21754. 1  | 53   | 0. 32538 | 6. 700134277 | 1  |
| MSTRG. 21754. 2  | 113  | 0. 3208  | 9. 296813965 | 1  |
| MSTRG. 21749. 9  | 625  | 0. 46875 | 7. 553527832 | 1  |
| MSTRG. 21755. 1  | 76   | 0. 32392 | 6. 786560059 | -1 |
| MSTRG. 21755. 2  | 76   | 0. 35519 | 6. 786560059 | -1 |
| MSTRG. 21760. 1  | 165  | 0. 31356 | 10. 82000732 | 1  |
| MSTRG. 21771. 6  | 2550 | 0. 43692 | 5. 687927246 | 1  |
| MSTRG. 21772. 1  | 150  | 0. 29003 | 9. 878845215 | 1  |

|                  |      |          |              |    |
|------------------|------|----------|--------------|----|
| MSTRG. 21771. 19 | 513  | 0. 43008 | 8. 925476074 | 1  |
| MSTRG. 21771. 20 | 577  | 0. 41912 | 9. 005432129 | 1  |
| MSTRG. 21771. 21 | 577  | 0. 4215  | 9. 005432129 | 1  |
| MSTRG. 21771. 22 | 554  | 0. 39897 | 9. 078430176 | 1  |
| MSTRG. 21771. 23 | 448  | 0. 46709 | 8. 723083496 | 1  |
| MSTRG. 21773. 1  | 84   | 0. 3351  | 7. 674987793 | 1  |
| MSTRG. 21775. 1  | 55   | 0. 38663 | 5. 398864746 | 1  |
| MSTRG. 21771. 24 | 4967 | 0. 45739 | 6. 126525879 | 1  |
| MSTRG. 21771. 25 | 4988 | 0. 46014 | 6. 136657715 | 1  |
| MSTRG. 21771. 26 | 4971 | 0. 46014 | 6. 156433105 | 1  |
| MSTRG. 21771. 27 | 4942 | 0. 45739 | 6. 141418457 | -1 |
| MSTRG. 21771. 28 | 1493 | 0. 44511 | 6. 985534668 | 1  |
| MSTRG. 21771. 29 | 949  | 0. 46895 | 5. 27923584  | 1  |
| MSTRG. 21763. 1  | 59   | 0. 44834 | 9. 380065918 | 1  |
| MSTRG. 21779. 2  | 1643 | 0. 4474  | 6. 140686035 | 1  |
| MSTRG. 21779. 1  | 1642 | 0. 44416 | 6. 140686035 | 1  |
| MSTRG. 21790. 1  | 232  | 0. 27991 | 8. 696105957 | 1  |
| MSTRG. 21791. 2  | 56   | 0. 31501 | 7. 913879395 | 1  |
| MSTRG. 21795. 1  | 339  | 0. 45564 | 7. 525939941 | 1  |
| MSTRG. 21795. 3  | 348  | 0. 34515 | 6. 967224121 | 1  |
| MSTRG. 21795. 4  | 91   | 0. 30624 | 7. 833679199 | 1  |
| MSTRG. 21795. 5  | 232  | 0. 44682 | 6. 172668457 | 1  |
| MSTRG. 21795. 6  | 91   | 0. 33931 | 7. 833679199 | 1  |
| MSTRG. 21796. 1  | 69   | 0. 35401 | 6. 562194824 | 1  |
| MSTRG. 21797. 1  | 519  | 0. 36883 | 9. 848693848 | 1  |
| MSTRG. 21797. 2  | 519  | 0. 37704 | 9. 848693848 | 1  |
| MSTRG. 21794. 1  | 38   | 0. 39894 | 5. 947814941 | -1 |
| MSTRG. 21806. 2  | 237  | 0. 41999 | 6. 704162598 | 1  |
| MSTRG. 21812. 2  | 112  | 0. 30396 | 4. 707824707 | 1  |
| MSTRG. 21812. 1  | 112  | 0. 3794  | 4. 707824707 | 1  |
| MSTRG. 21812. 4  | 737  | 0. 32105 | 9. 202941895 | 1  |
| MSTRG. 21808. 2  | 515  | 0. 39766 | 9. 170715332 | 1  |
| MSTRG. 21815. 1  | 52   | 0. 36757 | 8. 932189941 | 1  |
| MSTRG. 21817. 2  | 113  | 0. 3432  | 8. 640930176 | 1  |
| MSTRG. 21818. 3  | 195  | 0. 3769  | 8. 641540527 | 1  |
| MSTRG. 21819. 1  | 327  | 0. 37596 | 6. 988342285 | 1  |
| MSTRG. 21820. 1  | 115  | 0. 29251 | 9. 741760254 | 1  |
| MSTRG. 21820. 2  | 115  | 0. 36184 | 9. 741760254 | 1  |
| MSTRG. 21827. 2  | 288  | 0. 42857 | 8. 802429199 | 1  |
| MSTRG. 21827. 3  | 235  | 0. 32289 | 9. 798522949 | 1  |
| MSTRG. 21829. 2  | 2245 | 0. 47454 | 5. 942321777 | 1  |
| MSTRG. 21829. 3  | 2245 | 0. 45636 | 5. 942321777 | 1  |
| MSTRG. 21831. 1  | 992  | 0. 41844 | 9. 624206543 | 1  |
| MSTRG. 21831. 10 | 968  | 0. 41968 | 9. 557800293 | 1  |
| MSTRG. 21831. 11 | 1002 | 0. 43399 | 9. 539733887 | 1  |
| MSTRG. 21831. 3  | 1026 | 0. 44785 | 9. 706970215 | 1  |
| MSTRG. 21831. 5  | 1003 | 0. 43399 | 9. 684509277 | 1  |
| MSTRG. 21831. 7  | 980  | 0. 43399 | 9. 624328613 | 1  |
| MSTRG. 21831. 9  | 745  | 0. 43151 | 9. 651184082 | 1  |
| MSTRG. 21831. 12 | 175  | 0. 27194 | 8. 426086426 | 1  |
| MSTRG. 21831. 13 | 602  | 0. 28746 | 11. 42657471 | 1  |
| MSTRG. 21831. 14 | 461  | 0. 35222 | 11. 81658936 | 1  |
| MSTRG. 21830. 1  | 53   | 0. 29196 | 9. 033508301 | 1  |
| MSTRG. 21834. 3  | 557  | 0. 46795 | 7. 401306152 | 1  |

|                  |      |          |              |    |
|------------------|------|----------|--------------|----|
| MSTRG. 21834. 2  | 497  | 0. 45614 | 6. 932556152 | 1  |
| MSTRG. 21837. 5  | 3056 | 0. 44651 | 9. 340515137 | 1  |
| MSTRG. 21837. 6  | 2975 | 0. 44903 | 9. 290466309 | 1  |
| MSTRG. 21837. 8  | 3057 | 0. 44651 | 9. 340515137 | 1  |
| MSTRG. 21837. 9  | 3012 | 0. 45211 | 9. 301696777 | 1  |
| MSTRG. 21842. 2  | 868  | 0. 43647 | 9. 094665527 | 1  |
| MSTRG. 21842. 6  | 78   | 0. 31818 | 6. 864196777 | 1  |
| MSTRG. 21841. 1  | 115  | 0. 41083 | 6. 001403809 | 1  |
| MSTRG. 21846. 1  | 605  | 0. 42655 | 8. 939025879 | 1  |
| MSTRG. 21846. 2  | 108  | 0. 30501 | 8. 122741699 | 1  |
| MSTRG. 21846. 3  | 260  | 0. 46046 | 7. 16595459  | 1  |
| MSTRG. 21856. 2  | 295  | 0. 4587  | 8. 656311035 | 1  |
| MSTRG. 21863. 1  | 50   | 0. 31951 | 6. 524597168 | 1  |
| MSTRG. 21864. 2  | 211  | 0. 30824 | 8. 990783691 | 1  |
| MSTRG. 21865. 1  | 115  | 0. 28311 | 9. 937683105 | 1  |
| MSTRG. 21850. 3  | 148  | 0. 29664 | 6. 325134277 | 1  |
| MSTRG. 21850. 2  | 327  | 0. 37359 | 5. 975280762 | 1  |
| MSTRG. 21867. 1  | 524  | 0. 4561  | 5. 250183105 | 1  |
| MSTRG. 21870. 1  | 61   | 0. 35876 | 6. 517150879 | -1 |
| MSTRG. 21874. 1  | 91   | 0. 36721 | 7. 768371582 | 1  |
| MSTRG. 21876. 1  | 32   | 0. 422   | 12. 00042725 | 1  |
| MSTRG. 21880. 1  | 1061 | 0. 41806 | 4. 766418457 | 1  |
| MSTRG. 21880. 2  | 591  | 0. 34844 | 5. 042419434 | 1  |
| MSTRG. 21880. 3  | 591  | 0. 38587 | 5. 042419434 | 1  |
| MSTRG. 21880. 4  | 118  | 0. 27526 | 9. 160949707 | 1  |
| MSTRG. 21880. 5  | 183  | 0. 28248 | 9. 983581543 | 1  |
| MSTRG. 21880. 6  | 125  | 0. 28002 | 6. 070129395 | 1  |
| MSTRG. 21881. 1  | 45   | 0. 46247 | 8. 491394043 | 1  |
| MSTRG. 21880. 7  | 125  | 0. 28002 | 6. 070129395 | 1  |
| MSTRG. 21880. 8  | 125  | 0. 28503 | 6. 070129395 | 1  |
| MSTRG. 21880. 9  | 123  | 0. 28002 | 8. 480529785 | 1  |
| MSTRG. 21885. 4  | 188  | 0. 41159 | 8. 491394043 | 1  |
| MSTRG. 21885. 3  | 188  | 0. 36327 | 8. 491394043 | 1  |
| MSTRG. 21886. 1  | 61   | 0. 31934 | 9. 625061035 | 1  |
| MSTRG. 21887. 1  | 1060 | 0. 46779 | 7. 059509277 | 1  |
| MSTRG. 21889. 1  | 91   | 0. 30349 | 12. 00140381 | 1  |
| MSTRG. 21890. 2  | 918  | 0. 45745 | 7. 231872559 | 1  |
| MSTRG. 21890. 3  | 310  | 0. 44481 | 6. 944274902 | 1  |
| MSTRG. 21890. 4  | 918  | 0. 4459  | 7. 231872559 | 1  |
| MSTRG. 21890. 5  | 614  | 0. 43314 | 7. 131286621 | 1  |
| MSTRG. 21890. 6  | 918  | 0. 43372 | 7. 23223877  | 1  |
| MSTRG. 21890. 7  | 766  | 0. 4365  | 7. 188049316 | 1  |
| MSTRG. 21890. 8  | 710  | 0. 45901 | 6. 416442871 | 1  |
| MSTRG. 21890. 12 | 269  | 0. 42796 | 6. 05291748  | -1 |
| MSTRG. 21890. 20 | 421  | 0. 42796 | 6. 319519043 | -1 |
| MSTRG. 21890. 15 | 293  | 0. 42796 | 6. 071228027 | -1 |
| MSTRG. 21890. 19 | 912  | 0. 4213  | 7. 23223877  | -1 |
| MSTRG. 21890. 10 | 308  | 0. 42787 | 6. 944274902 | -1 |
| MSTRG. 21890. 21 | 497  | 0. 42429 | 6. 406799316 | -1 |
| MSTRG. 21890. 22 | 269  | 0. 42966 | 6. 05291748  | -1 |
| MSTRG. 21882. 1  | 87   | 0. 36519 | 9. 648620605 | 1  |
| MSTRG. 21883. 1  | 71   | 0. 37274 | 10. 85162354 | 1  |
| MSTRG. 21897. 10 | 2577 | 0. 46153 | 7. 223693848 | 1  |
| MSTRG. 21897. 11 | 2521 | 0. 46153 | 7. 297546387 | 1  |



|                  |      |          |              |    |
|------------------|------|----------|--------------|----|
| MSTRG. 21897. 12 | 2523 | 0. 46153 | 7. 297546387 | 1  |
| MSTRG. 21897. 13 | 2557 | 0. 46153 | 7. 301452637 | 1  |
| MSTRG. 21897. 15 | 2522 | 0. 46153 | 7. 297546387 | 1  |
| MSTRG. 21897. 16 | 2521 | 0. 46153 | 7. 297546387 | 1  |
| MSTRG. 21897. 17 | 2576 | 0. 46153 | 7. 223693848 | 1  |
| MSTRG. 21897. 18 | 2538 | 0. 46153 | 7. 219543457 | 1  |
| MSTRG. 21897. 3  | 2523 | 0. 46153 | 7. 297546387 | 1  |
| MSTRG. 21897. 4  | 2522 | 0. 46153 | 7. 297546387 | 1  |
| MSTRG. 21897. 5  | 2476 | 0. 46923 | 7. 605163574 | 1  |
| MSTRG. 21897. 6  | 2539 | 0. 46153 | 7. 219543457 | 1  |
| MSTRG. 21897. 7  | 2521 | 0. 46153 | 7. 297546387 | 1  |
| MSTRG. 21897. 8  | 2539 | 0. 46153 | 7. 219543457 | 1  |
| MSTRG. 21897. 9  | 2540 | 0. 46153 | 7. 219543457 | 1  |
| MSTRG. 21898. 2  | 100  | 0. 30235 | 6. 085510254 | 1  |
| MSTRG. 21898. 1  | 80   | 0. 33073 | 7. 660949707 | 1  |
| MSTRG. 21899. 1  | 56   | 0. 34996 | 5. 999328613 | 1  |
| MSTRG. 21897. 19 | 2202 | 0. 45385 | 6. 966125488 | 1  |
| MSTRG. 21897. 20 | 2086 | 0. 44615 | 7. 077819824 | 1  |
| MSTRG. 21897. 21 | 2054 | 0. 37894 | 6. 574279785 | 1  |
| MSTRG. 21897. 22 | 1973 | 0. 44923 | 6. 952087402 | 1  |
| MSTRG. 21897. 23 | 1917 | 0. 45743 | 7. 00177002  | 1  |
| MSTRG. 21897. 24 | 1872 | 0. 46513 | 7. 226379395 | 1  |
| MSTRG. 21897. 25 | 1787 | 0. 44923 | 6. 859069824 | 1  |
| MSTRG. 21897. 26 | 1326 | 0. 45311 | 9. 296325684 | 1  |
| MSTRG. 21902. 1  | 59   | 0. 31296 | 8. 843322754 | 1  |
| MSTRG. 21903. 2  | 257  | 0. 28607 | 8. 880187988 | 1  |
| MSTRG. 21903. 5  | 100  | 0. 39542 | 9. 496398926 | 1  |
| MSTRG. 21903. 3  | 99   | 0. 4224  | 8. 541442871 | 1  |
| MSTRG. 21903. 4  | 93   | 0. 30436 | 6. 831359863 | 1  |
| MSTRG. 21903. 7  | 93   | 0. 36293 | 6. 831359863 | 1  |
| MSTRG. 21905. 2  | 112  | 0. 29152 | 11. 65509033 | 1  |
| MSTRG. 21905. 3  | 123  | 0. 27251 | 10. 28253174 | 1  |
| MSTRG. 21905. 6  | 141  | 0. 28923 | 10. 72283936 | 1  |
| MSTRG. 21907. 2  | 664  | 0. 40116 | 6. 250915527 | 1  |
| MSTRG. 21907. 3  | 854  | 0. 44097 | 5. 933898926 | 1  |
| MSTRG. 21912. 1  | 372  | 0. 45681 | 5. 215393066 | 1  |
| MSTRG. 21912. 2  | 181  | 0. 39806 | 4. 903259277 | 1  |
| MSTRG. 21900. 5  | 365  | 0. 43484 | 9. 612731934 | 1  |
| MSTRG. 21916. 3  | 876  | 0. 43668 | 8. 660461426 | 1  |
| MSTRG. 21917. 1  | 90   | 0. 33097 | 9. 387390137 | 1  |
| MSTRG. 21918. 2  | 158  | 0. 38867 | 11. 33319092 | 1  |
| MSTRG. 21919. 4  | 172  | 0. 3867  | 9. 79888916  | 1  |
| MSTRG. 21919. 5  | 44   | 0. 3514  | 10. 39080811 | 1  |
| MSTRG. 21920. 7  | 875  | 0. 4612  | 5. 504455566 | 1  |
| MSTRG. 21925. 1  | 1274 | 0. 44432 | 6. 75604248  | 1  |
| MSTRG. 21926. 1  | 57   | 0. 44934 | 9. 301330566 | 1  |
| MSTRG. 21925. 2  | 727  | 0. 41032 | 5. 329284668 | 1  |
| MSTRG. 21925. 3  | 1274 | 0. 4359  | 6. 75604248  | 1  |
| MSTRG. 21927. 1  | 44   | 0. 3513  | 11. 43719482 | -1 |
| MSTRG. 21927. 2  | 95   | 0. 36017 | 9. 828186035 | 1  |
| MSTRG. 21925. 4  | 1274 | 0. 45011 | 6. 75604248  | 1  |
| MSTRG. 21925. 5  | 1274 | 0. 44951 | 6. 75604248  | 1  |
| MSTRG. 21928. 2  | 107  | 0. 37029 | 5. 739196777 | 1  |
| MSTRG. 21921. 2  | 166  | 0. 35099 | 10. 33026123 | 1  |

|                  |      |          |              |    |
|------------------|------|----------|--------------|----|
| MSTRG. 21932. 2  | 342  | 0. 43218 | 6. 108825684 | 1  |
| MSTRG. 21932. 3  | 295  | 0. 44074 | 6. 446350098 | 1  |
| MSTRG. 21934. 2  | 198  | 0. 46452 | 5. 321105957 | 1  |
| MSTRG. 21935. 2  | 65   | 0. 33648 | 4. 889831543 | 1  |
| MSTRG. 21941. 1  | 2204 | 0. 48782 | 5. 646179199 | 1  |
| MSTRG. 21941. 2  | 2203 | 0. 46937 | 5. 627502441 | 1  |
| MSTRG. 21942. 1  | 435  | 0. 41555 | 11. 3036499  | 1  |
| MSTRG. 21942. 5  | 178  | 0. 43242 | 8. 57208252  | 1  |
| MSTRG. 21939. 2  | 1394 | 0. 46955 | 5. 214782715 | 1  |
| MSTRG. 21940. 1  | 53   | 0. 39851 | 9. 489807129 | 1  |
| MSTRG. 21939. 3  | 2084 | 0. 45565 | 5. 218200684 | 1  |
| MSTRG. 21939. 4  | 2150 | 0. 46396 | 5. 220031738 | 1  |
| MSTRG. 21943. 1  | 540  | 0. 42682 | 5. 266906738 | 1  |
| MSTRG. 21943. 2  | 638  | 0. 42403 | 5. 281066895 | 1  |
| MSTRG. 21949. 1  | 210  | 0. 34376 | 4. 811828613 | 1  |
| MSTRG. 21953. 1  | 16   | 0. 40335 | 7. 880432129 | 1  |
| MSTRG. 21955. 1  | 62   | 0. 37229 | 6. 512390137 | 1  |
| MSTRG. 21958. 4  | 89   | 0. 46764 | 7. 772644043 | 1  |
| MSTRG. 21958. 5  | 96   | 0. 39434 | 6. 075378418 | 1  |
| MSTRG. 21958. 10 | 96   | 0. 40203 | 6. 075378418 | 1  |
| MSTRG. 21958. 3  | 135  | 0. 40914 | 5. 534851074 | 1  |
| MSTRG. 21958. 6  | 114  | 0. 45252 | 9. 670227051 | 1  |
| MSTRG. 21958. 7  | 114  | 0. 3732  | 9. 670227051 | 1  |
| MSTRG. 21958. 8  | 135  | 0. 41811 | 5. 534851074 | 1  |
| MSTRG. 21958. 9  | 114  | 0. 39618 | 9. 670227051 | 1  |
| MSTRG. 21959. 1  | 91   | 0. 43796 | 5. 30657959  | 1  |
| MSTRG. 21961. 2  | 776  | 0. 45764 | 9. 31829834  | 1  |
| MSTRG. 21961. 3  | 779  | 0. 45764 | 9. 33380127  | 1  |
| MSTRG. 21961. 4  | 402  | 0. 43849 | 9. 102233887 | 1  |
| MSTRG. 21961. 5  | 402  | 0. 42742 | 9. 102233887 | 1  |
| MSTRG. 21963. 3  | 479  | 0. 48666 | 6. 118225098 | 1  |
| MSTRG. 21977. 2  | 316  | 0. 4357  | 8. 498962402 | 1  |
| MSTRG. 21978. 2  | 662  | 0. 46169 | 8. 930969238 | -1 |
| MSTRG. 21980. 1  | 123  | 0. 34734 | 10. 690979   | 1  |
| MSTRG. 21985. 2  | 1024 | 0. 46224 | 5. 409362793 | 1  |
| MSTRG. 21985. 4  | 1024 | 0. 46495 | 5. 409362793 | 1  |
| MSTRG. 21985. 5  | 899  | 0. 46224 | 6. 301940918 | 1  |
| MSTRG. 21985. 6  | 997  | 0. 47114 | 5. 304016113 | 1  |
| MSTRG. 21985. 7  | 1024 | 0. 48139 | 5. 409362793 | 1  |
| MSTRG. 21985. 8  | 445  | 0. 32417 | 4. 848449707 | 1  |
| MSTRG. 21987. 2  | 598  | 0. 3405  | 5. 514587402 | 1  |
| MSTRG. 21987. 3  | 127  | 0. 38464 | 9. 593688965 | 1  |
| MSTRG. 21965. 1  | 272  | 0. 38051 | 4. 647766113 | 1  |
| MSTRG. 21965. 2  | 170  | 0. 39831 | 8. 785705566 | 1  |
| MSTRG. 21966. 1  | 42   | 0. 32943 | 9. 786437988 | 1  |
| MSTRG. 21967. 1  | 188  | 0. 3445  | 9. 51373291  | 1  |
| MSTRG. 21967. 2  | 188  | 0. 3445  | 9. 51373291  | 1  |
| MSTRG. 21967. 4  | 188  | 0. 39149 | 9. 51373291  | 1  |
| MSTRG. 21967. 5  | 188  | 0. 37099 | 9. 51373291  | 1  |
| MSTRG. 21967. 6  | 158  | 0. 40238 | 10. 26312256 | 1  |
| MSTRG. 21968. 3  | 87   | 0. 4839  | 5. 147155762 | 1  |
| MSTRG. 21971. 1  | 588  | 0. 34463 | 7. 752746582 | 1  |
| MSTRG. 21971. 2  | 410  | 0. 34463 | 8. 669494629 | 1  |
| MSTRG. 21972. 1  | 272  | 0. 43977 | 7. 144836426 | 1  |

|                  |      |          |              |   |
|------------------|------|----------|--------------|---|
| MSTRG. 21994. 4  | 343  | 0. 36439 | 5. 521789551 | 1 |
| MSTRG. 21994. 3  | 343  | 0. 33135 | 5. 521789551 | 1 |
| MSTRG. 21994. 5  | 273  | 0. 35768 | 7. 663757324 | 1 |
| MSTRG. 21996. 12 | 714  | 0. 4518  | 9. 612609863 | 1 |
| MSTRG. 21996. 17 | 902  | 0. 37222 | 8. 38092041  | 1 |
| MSTRG. 21996. 14 | 913  | 0. 4072  | 7. 319641113 | 1 |
| MSTRG. 21996. 16 | 709  | 0. 38423 | 9. 671447754 | 1 |
| MSTRG. 21996. 9  | 1031 | 0. 46413 | 8. 949401855 | 1 |
| MSTRG. 21996. 10 | 1076 | 0. 46446 | 9. 049743652 | 1 |
| MSTRG. 21996. 13 | 961  | 0. 4476  | 8. 075622559 | 1 |
| MSTRG. 21996. 6  | 1004 | 0. 48258 | 8. 397155762 | 1 |
| MSTRG. 21996. 8  | 1052 | 0. 4665  | 8. 760925293 | 1 |
| MSTRG. 21996. 15 | 1049 | 0. 46    | 8. 960754395 | 1 |
| MSTRG. 21997. 1  | 67   | 0. 32089 | 6. 143859863 | 1 |
| MSTRG. 22002. 2  | 443  | 0. 34198 | 5. 485534668 | 1 |
| MSTRG. 22005. 4  | 863  | 0. 44965 | 6. 989685059 | 1 |
| MSTRG. 22008. 1  | 156  | 0. 28396 | 9. 891296387 | 1 |
| MSTRG. 22008. 2  | 156  | 0. 28648 | 9. 891296387 | 1 |
| MSTRG. 22008. 3  | 119  | 0. 36843 | 10. 95782471 | 1 |
| MSTRG. 22010. 3  | 2016 | 0. 45463 | 6. 096374512 | 1 |
| MSTRG. 22010. 4  | 1607 | 0. 4508  | 6. 36932373  | 1 |
| MSTRG. 22010. 5  | 2016 | 0. 49689 | 6. 096374512 | 1 |
| MSTRG. 22021. 1  | 84   | 0. 32954 | 4. 750305176 | 1 |
| MSTRG. 22014. 1  | 124  | 0. 42375 | 9. 097595215 | 1 |
| MSTRG. 22026. 1  | 331  | 0. 36172 | 5. 546813965 | 1 |
| MSTRG. 22028. 1  | 189  | 0. 30644 | 10. 20318604 | 1 |
| MSTRG. 22027. 4  | 112  | 0. 28826 | 5. 183776855 | 1 |
| MSTRG. 22029. 1  | 60   | 0. 35598 | 9. 101013184 | 1 |
| MSTRG. 22027. 6  | 728  | 0. 44772 | 7. 026184082 | 1 |
| MSTRG. 22034. 2  | 347  | 0. 34508 | 4. 616394043 | 1 |
| MSTRG. 22034. 5  | 194  | 0. 29576 | 8. 773864746 | 1 |
| MSTRG. 22030. 3  | 988  | 0. 37899 | 6. 272277832 | 1 |
| MSTRG. 22030. 2  | 988  | 0. 37837 | 6. 272277832 | 1 |
| MSTRG. 22030. 4  | 981  | 0. 37837 | 6. 394958496 | 1 |
| MSTRG. 22038. 3  | 620  | 0. 444   | 5. 848815918 | 1 |
| MSTRG. 22041. 3  | 144  | 0. 33634 | 6. 727233887 | 1 |
| MSTRG. 22041. 4  | 95   | 0. 28111 | 9. 297180176 | 1 |
| MSTRG. 22042. 1  | 29   | 0. 39381 | 9. 514099121 | 1 |
| MSTRG. 22043. 1  | 599  | 0. 45171 | 5. 421691895 | 1 |
| MSTRG. 22043. 3  | 151  | 0. 37837 | 6. 742614746 | 1 |
| MSTRG. 22043. 4  | 599  | 0. 46137 | 5. 421691895 | 1 |
| MSTRG. 22045. 2  | 123  | 0. 32018 | 6. 062072754 | 1 |
| MSTRG. 22046. 2  | 205  | 0. 28167 | 8. 344055176 | 1 |
| MSTRG. 22050. 3  | 2075 | 0. 42178 | 5. 667297363 | 1 |
| MSTRG. 22051. 1  | 81   | 0. 35056 | 8. 987976074 | 1 |
| MSTRG. 22051. 2  | 83   | 0. 34723 | 9. 570983887 | 1 |
| MSTRG. 22050. 4  | 277  | 0. 40269 | 4. 961242676 | 1 |
| MSTRG. 22056. 1  | 82   | 0. 35528 | 9. 579406738 | 1 |
| MSTRG. 22058. 1  | 58   | 0. 42754 | 11. 73919678 | 1 |
| MSTRG. 22063. 3  | 743  | 0. 41282 | 8. 281433105 | 1 |
| MSTRG. 22063. 4  | 923  | 0. 46858 | 5. 956970215 | 1 |
| MSTRG. 22063. 5  | 282  | 0. 3943  | 6. 780456543 | 1 |
| MSTRG. 22059. 1  | 103  | 0. 36178 | 10. 8270874  | 1 |
| MSTRG. 22059. 2  | 48   | 0. 35527 | 9. 489196777 | 1 |

|                  |      |          |              |    |
|------------------|------|----------|--------------|----|
| MSTRG. 22064. 3  | 457  | 0. 40837 | 7. 610656738 | 1  |
| MSTRG. 22064. 4  | 500  | 0. 40893 | 8. 812683105 | 1  |
| MSTRG. 22065. 2  | 310  | 0. 4665  | 9. 426208496 | 1  |
| MSTRG. 22068. 1  | 876  | 0. 43207 | 10. 05255127 | 1  |
| MSTRG. 22071. 2  | 330  | 0. 4569  | 6. 164001465 | 1  |
| MSTRG. 22072. 1  | 816  | 0. 41101 | 8. 469543457 | 1  |
| MSTRG. 22072. 3  | 163  | 0. 41229 | 5. 77947998  | 1  |
| MSTRG. 22074. 1  | 130  | 0. 38247 | 8. 865539551 | 1  |
| MSTRG. 22070. 1  | 183  | 0. 31834 | 9. 134094238 | 1  |
| MSTRG. 22070. 2  | 210  | 0. 30966 | 9. 377624512 | 1  |
| MSTRG. 22075. 2  | 700  | 0. 38937 | 8. 597229004 | 1  |
| MSTRG. 22075. 3  | 700  | 0. 36352 | 8. 597229004 | 1  |
| MSTRG. 22075. 4  | 700  | 0. 33986 | 8. 597229004 | 1  |
| MSTRG. 22076. 1  | 65   | 0. 45989 | 6. 696594238 | -1 |
| MSTRG. 22078. 3  | 592  | 0. 45962 | 6. 718688965 | 1  |
| MSTRG. 22080. 1  | 287  | 0. 43675 | 10. 68902588 | 1  |
| MSTRG. 22080. 6  | 287  | 0. 46686 | 10. 68902588 | 1  |
| MSTRG. 22113. 6  | 2492 | 0. 43203 | 5. 693786621 | 1  |
| MSTRG. 22113. 5  | 4415 | 0. 45961 | 5. 713317871 | 1  |
| MSTRG. 22113. 7  | 3825 | 0. 48734 | 5. 717346191 | -1 |
| MSTRG. 22114. 1  | 183  | 0. 3064  | 9. 75177002  | 1  |
| MSTRG. 22113. 9  | 1982 | 0. 43668 | 5. 874328613 | 1  |
| MSTRG. 22115. 3  | 581  | 0. 39862 | 5. 590148926 | 1  |
| MSTRG. 22116. 1  | 32   | 0. 33336 | 4. 948425293 | 1  |
| MSTRG. 22117. 1  | 52   | 0. 32883 | 9. 302307129 | -1 |
| MSTRG. 22118. 4  | 590  | 0. 49517 | 6. 671447754 | 1  |
| MSTRG. 22118. 2  | 947  | 0. 45711 | 6. 205871582 | 1  |
| MSTRG. 22118. 3  | 486  | 0. 33958 | 7. 588684082 | 1  |
| MSTRG. 22118. 5  | 761  | 0. 44656 | 5. 886413574 | 1  |
| MSTRG. 22126. 1  | 845  | 0. 41752 | 5. 675476074 | 1  |
| MSTRG. 22126. 2  | 845  | 0. 40234 | 5. 649475098 | 1  |
| MSTRG. 22126. 3  | 845  | 0. 32999 | 5. 649475098 | 1  |
| MSTRG. 22126. 4  | 845  | 0. 40234 | 5. 675476074 | 1  |
| MSTRG. 22126. 5  | 717  | 0. 40572 | 5. 851257324 | 1  |
| MSTRG. 22126. 10 | 754  | 0. 39693 | 6. 195251465 | 1  |
| MSTRG. 22082. 3  | 2473 | 0. 43768 | 6. 41583252  | 1  |
| MSTRG. 22082. 5  | 983  | 0. 47722 | 5. 843200684 | 1  |
| MSTRG. 22082. 4  | 2599 | 0. 43768 | 7. 180480957 | -1 |
| MSTRG. 22084. 2  | 424  | 0. 29615 | 6. 747375488 | 1  |
| MSTRG. 22086. 1  | 23   | 0. 46683 | 12. 17852783 | 1  |
| MSTRG. 22089. 3  | 224  | 0. 32946 | 7. 812561035 | 1  |
| MSTRG. 22089. 4  | 213  | 0. 34547 | 7. 797180176 | 1  |
| MSTRG. 22089. 5  | 224  | 0. 3665  | 7. 812561035 | 1  |
| MSTRG. 22091. 1  | 89   | 0. 40872 | 6. 889587402 | 1  |
| MSTRG. 22091. 3  | 89   | 0. 42419 | 6. 889587402 | 1  |
| MSTRG. 22098. 2  | 71   | 0. 32575 | 10. 43939209 | 1  |
| MSTRG. 22099. 2  | 211  | 0. 41151 | 4. 574157715 | 1  |
| MSTRG. 22103. 2  | 216  | 0. 2899  | 5. 328918457 | 1  |
| MSTRG. 22139. 5  | 470  | 0. 46464 | 6. 17779541  | 1  |
| MSTRG. 22139. 6  | 713  | 0. 4318  | 6. 425964355 | 1  |
| MSTRG. 22141. 1  | 70   | 0. 33843 | 10. 73651123 | 1  |
| MSTRG. 22141. 2  | 118  | 0. 27379 | 10. 58892822 | 1  |
| MSTRG. 22141. 3  | 51   | 0. 30617 | 11. 26971436 | -1 |
| MSTRG. 22142. 1  | 130  | 0. 33287 | 8. 81451416  | 1  |

|                  |      |          |              |   |
|------------------|------|----------|--------------|---|
| MSTRG. 22145. 2  | 184  | 0. 40334 | 9. 535217285 | 1 |
| MSTRG. 22146. 1  | 1068 | 0. 4367  | 8. 458435059 | 1 |
| MSTRG. 22146. 2  | 1068 | 0. 44272 | 8. 458435059 | 1 |
| MSTRG. 22146. 3  | 1068 | 0. 42389 | 8. 458435059 | 1 |
| MSTRG. 22147. 2  | 323  | 0. 35373 | 5. 70501709  | 1 |
| MSTRG. 22147. 3  | 312  | 0. 31956 | 6. 356872559 | 1 |
| MSTRG. 22155. 1  | 2272 | 0. 44221 | 6. 061706543 | 1 |
| MSTRG. 22155. 2  | 2273 | 0. 43663 | 6. 132263184 | 1 |
| MSTRG. 22155. 4  | 1452 | 0. 4418  | 6. 223937988 | 1 |
| MSTRG. 22155. 3  | 1452 | 0. 44922 | 6. 223937988 | 1 |
| MSTRG. 22155. 7  | 189  | 0. 47277 | 9. 58416748  | 1 |
| MSTRG. 22150. 1  | 83   | 0. 313   | 4. 761291504 | 1 |
| MSTRG. 22152. 2  | 379  | 0. 33988 | 9. 116882324 | 1 |
| MSTRG. 22152. 3  | 381  | 0. 31986 | 5. 288391113 | 1 |
| MSTRG. 22152. 5  | 617  | 0. 31337 | 5. 566711426 | 1 |
| MSTRG. 22153. 1  | 510  | 0. 38207 | 6. 061096191 | 1 |
| MSTRG. 22168. 1  | 272  | 0. 27957 | 9. 716247559 | 1 |
| MSTRG. 22179. 1  | 189  | 0. 28002 | 6. 525817871 | 1 |
| MSTRG. 22179. 2  | 205  | 0. 3016  | 12. 17755127 | 1 |
| MSTRG. 22179. 3  | 164  | 0. 27251 | 10. 75189209 | 1 |
| MSTRG. 22179. 4  | 134  | 0. 27251 | 5. 756164551 | 1 |
| MSTRG. 22179. 5  | 134  | 0. 27251 | 5. 756164551 | 1 |
| MSTRG. 22179. 7  | 146  | 0. 27651 | 9. 493103027 | 1 |
| MSTRG. 22179. 8  | 146  | 0. 33464 | 9. 493103027 | 1 |
| MSTRG. 22179. 9  | 146  | 0. 28195 | 9. 493103027 | 1 |
| MSTRG. 22179. 6  | 146  | 0. 27651 | 9. 493103027 | 1 |
| MSTRG. 22179. 10 | 146  | 0. 27651 | 9. 493103027 | 1 |
| MSTRG. 22179. 11 | 146  | 0. 27651 | 9. 493103027 | 1 |
| MSTRG. 22179. 13 | 146  | 0. 27651 | 9. 493103027 | 1 |
| MSTRG. 22179. 12 | 146  | 0. 28195 | 9. 493103027 | 1 |
| MSTRG. 22179. 14 | 147  | 0. 28324 | 9. 675354004 | 1 |
| MSTRG. 22179. 15 | 147  | 0. 28923 | 9. 675354004 | 1 |
| MSTRG. 22179. 16 | 124  | 0. 28567 | 8. 937438965 | 1 |
| MSTRG. 22181. 1  | 136  | 0. 28923 | 9. 92779541  | 1 |
| MSTRG. 22181. 2  | 136  | 0. 27911 | 9. 92779541  | 1 |
| MSTRG. 22181. 3  | 136  | 0. 27992 | 9. 92779541  | 1 |
| MSTRG. 22181. 4  | 136  | 0. 3331  | 9. 92779541  | 1 |
| MSTRG. 22181. 5  | 111  | 0. 28923 | 9. 97076416  | 1 |
| MSTRG. 22181. 6  | 110  | 0. 28518 | 9. 509338379 | 1 |
| MSTRG. 22182. 1  | 340  | 0. 33897 | 9. 361877441 | 1 |
| MSTRG. 22182. 3  | 463  | 0. 34523 | 9. 108459473 | 1 |
| MSTRG. 22181. 7  | 100  | 0. 28518 | 7. 069396973 | 1 |
| MSTRG. 22184. 1  | 1800 | 0. 38425 | 9. 289611816 | 1 |
| MSTRG. 22184. 2  | 124  | 0. 28122 | 5. 64666748  | 1 |
| MSTRG. 22184. 3  | 1800 | 0. 38425 | 9. 289611816 | 1 |
| MSTRG. 22184. 5  | 1800 | 0. 31175 | 9. 289611816 | 1 |
| MSTRG. 22184. 6  | 1800 | 0. 38198 | 9. 289611816 | 1 |
| MSTRG. 22185. 1  | 89   | 0. 27379 | 9. 09942627  | 1 |
| MSTRG. 22170. 2  | 220  | 0. 4354  | 6. 500793457 | 1 |
| MSTRG. 22172. 3  | 280  | 0. 44723 | 7. 969421387 | 1 |
| MSTRG. 22175. 1  | 1295 | 0. 44073 | 8. 553405762 | 1 |
| MSTRG. 22175. 2  | 1289 | 0. 43303 | 5. 953552246 | 1 |
| MSTRG. 22189. 2  | 56   | 0. 37351 | 8. 88873291  | 1 |
| MSTRG. 22190. 1  | 95   | 0. 30557 | 8. 735656738 | 1 |

|                 |      |          |              |    |
|-----------------|------|----------|--------------|----|
| MSTRG. 22190. 2 | 120  | 0. 27437 | 11. 02301025 | 1  |
| MSTRG. 22191. 2 | 79   | 0. 31988 | 11. 54803467 | 1  |
| MSTRG. 22192. 3 | 681  | 0. 41285 | 6. 173522949 | 1  |
| MSTRG. 22195. 3 | 377  | 0. 47277 | 9. 358947754 | 1  |
| MSTRG. 22195. 2 | 377  | 0. 43284 | 9. 358947754 | 1  |
| MSTRG. 22178. 2 | 71   | 0. 32486 | 6. 889831543 | 1  |
| MSTRG. 22178. 3 | 195  | 0. 27987 | 11. 50604248 | 1  |
| MSTRG. 22188. 1 | 148  | 0. 33419 | 9. 098083496 | 1  |
| MSTRG. 22197. 1 | 87   | 0. 35185 | 7. 767150879 | -1 |
| MSTRG. 22219. 1 | 1309 | 0. 36087 | 6. 219909668 | 1  |
| MSTRG. 22220. 1 | 74   | 0. 37287 | 9. 684387207 | -1 |
| MSTRG. 22219. 2 | 271  | 0. 40899 | 6. 412536621 | 1  |
| MSTRG. 22219. 5 | 198  | 0. 32642 | 6. 231384277 | 1  |
| MSTRG. 22219. 3 | 198  | 0. 32582 | 6. 231384277 | 1  |
| MSTRG. 22223. 5 | 94   | 0. 34881 | 9. 597961426 | 1  |
| MSTRG. 22224. 1 | 193  | 0. 30285 | 9. 940612793 | 1  |
| MSTRG. 22226. 1 | 183  | 0. 28642 | 10. 08807373 | 1  |
| MSTRG. 22228. 1 | 530  | 0. 2921  | 8. 686584473 | 1  |
| MSTRG. 22228. 2 | 37   | 0. 30419 | 11. 74432373 | 1  |
| MSTRG. 22223. 6 | 195  | 0. 33496 | 8. 512023926 | 1  |
| MSTRG. 22230. 1 | 53   | 0. 2876  | 9. 382629395 | 1  |
| MSTRG. 22199. 1 | 87   | 0. 44252 | 6. 492004395 | 1  |
| MSTRG. 22200. 1 | 109  | 0. 27911 | 7. 588317871 | 1  |
| MSTRG. 22203. 2 | 180  | 0. 45303 | 9. 53692627  | 1  |
| MSTRG. 22204. 1 | 71   | 0. 40135 | 11. 23431396 | 1  |
| MSTRG. 22205. 1 | 469  | 0. 40516 | 7. 102478027 | 1  |
| MSTRG. 22205. 2 | 402  | 0. 40561 | 7. 086364746 | 1  |
| MSTRG. 22205. 4 | 402  | 0. 37018 | 7. 086364746 | 1  |
| MSTRG. 22207. 3 | 386  | 0. 39445 | 6. 759094238 | 1  |
| MSTRG. 22207. 7 | 386  | 0. 40808 | 6. 759094238 | 1  |
| MSTRG. 22207. 9 | 386  | 0. 41423 | 6. 759094238 | 1  |
| MSTRG. 22208. 4 | 584  | 0. 41162 | 9. 19732666  | 1  |
| MSTRG. 22211. 5 | 223  | 0. 44239 | 5. 933532715 | 1  |
| MSTRG. 22212. 2 | 683  | 0. 46351 | 6. 616394043 | 1  |
| MSTRG. 22212. 3 | 619  | 0. 47257 | 7. 078674316 | 1  |
| MSTRG. 22213. 4 | 149  | 0. 39547 | 9. 602600098 | 1  |
| MSTRG. 22213. 5 | 149  | 0. 36522 | 9. 602600098 | 1  |
| MSTRG. 22213. 2 | 153  | 0. 3649  | 12. 14300537 | 1  |
| MSTRG. 22213. 3 | 153  | 0. 38714 | 12. 14300537 | 1  |
| MSTRG. 22214. 4 | 103  | 0. 31981 | 7. 784606934 | 1  |
| MSTRG. 22216. 7 | 633  | 0. 46022 | 5. 181335449 | 1  |
| MSTRG. 22217. 1 | 77   | 0. 28396 | 8. 934509277 | 1  |
| MSTRG. 22238. 4 | 183  | 0. 28466 | 10. 80096436 | 1  |
| MSTRG. 22238. 6 | 180  | 0. 34931 | 11. 00238037 | 1  |
| MSTRG. 22238. 7 | 183  | 0. 30151 | 11. 00213623 | 1  |
| MSTRG. 22239. 1 | 104  | 0. 2857  | 8. 963317871 | 1  |
| MSTRG. 22240. 1 | 94   | 0. 2887  | 7. 863708496 | 1  |
| MSTRG. 22241. 1 | 354  | 0. 46587 | 6. 522644043 | 1  |
| MSTRG. 22242. 2 | 217  | 0. 39813 | 4. 594543457 | 1  |
| MSTRG. 22242. 3 | 276  | 0. 42456 | 4. 633483887 | 1  |
| MSTRG. 22242. 4 | 216  | 0. 38394 | 4. 594543457 | 1  |
| MSTRG. 22245. 2 | 793  | 0. 44144 | 5. 153381348 | 1  |
| MSTRG. 22246. 3 | 661  | 0. 41636 | 6. 340393066 | 1  |
| MSTRG. 22251. 3 | 133  | 0. 37241 | 5. 52947998  | 1  |

|                  |      |          |              |    |
|------------------|------|----------|--------------|----|
| MSTRG. 22251. 2  | 400  | 0. 4332  | 5. 920959473 | 1  |
| MSTRG. 22251. 4  | 346  | 0. 45868 | 5. 897155762 | 1  |
| MSTRG. 22261. 1  | 188  | 0. 2785  | 7. 076721191 | 1  |
| MSTRG. 22261. 2  | 188  | 0. 34942 | 7. 076721191 | 1  |
| MSTRG. 22262. 2  | 93   | 0. 32002 | 9. 179504395 | 1  |
| MSTRG. 22262. 3  | 147  | 0. 41784 | 9. 898132324 | 1  |
| MSTRG. 22262. 4  | 140  | 0. 35615 | 5. 774597168 | 1  |
| MSTRG. 22262. 5  | 156  | 0. 46706 | 10. 55426025 | 1  |
| MSTRG. 22265. 1  | 32   | 0. 31461 | 12. 18109131 | 1  |
| MSTRG. 22264. 3  | 693  | 0. 47047 | 5. 80657959  | 1  |
| MSTRG. 22264. 4  | 693  | 0. 46552 | 5. 80657959  | 1  |
| MSTRG. 22276. 2  | 147  | 0. 35285 | 10. 18865967 | 1  |
| MSTRG. 22277. 1  | 1039 | 0. 45057 | 8. 547912598 | 1  |
| MSTRG. 22277. 3  | 998  | 0. 4534  | 8. 007019043 | 1  |
| MSTRG. 22277. 10 | 951  | 0. 45571 | 8. 749572754 | 1  |
| MSTRG. 22277. 5  | 933  | 0. 45875 | 8. 565002441 | 1  |
| MSTRG. 22277. 9  | 994  | 0. 44909 | 8. 922790527 | 1  |
| MSTRG. 22277. 7  | 977  | 0. 44909 | 8. 789489746 | 1  |
| MSTRG. 22277. 11 | 76   | 0. 33058 | 5. 096862793 | 1  |
| MSTRG. 22269. 2  | 192  | 0. 3227  | 6. 08795166  | 1  |
| MSTRG. 22269. 3  | 103  | 0. 29456 | 9. 97088623  | 1  |
| MSTRG. 22271. 1  | 48   | 0. 39435 | 4. 049133301 | 1  |
| MSTRG. 22282. 1  | 134  | 0. 2857  | 10. 27020264 | 1  |
| MSTRG. 22282. 2  | 376  | 0. 28561 | 11. 08099365 | 1  |
| MSTRG. 22282. 3  | 376  | 0. 28561 | 11. 08099365 | 1  |
| MSTRG. 22283. 3  | 353  | 0. 29395 | 9. 15838623  | 1  |
| MSTRG. 22284. 2  | 984  | 0. 45253 | 8. 309509277 | 1  |
| MSTRG. 22285. 1  | 1250 | 0. 42821 | 11. 41143799 | 1  |
| MSTRG. 22286. 3  | 388  | 0. 43817 | 9. 567565918 | 1  |
| MSTRG. 22286. 6  | 388  | 0. 45296 | 9. 567565918 | 1  |
| MSTRG. 22301. 1  | 87   | 0. 37041 | 6. 714416504 | 1  |
| MSTRG. 22309. 1  | 162  | 0. 45473 | 9. 045227051 | -1 |
| MSTRG. 22310. 1  | 256  | 0. 39612 | 8. 741149902 | 1  |
| MSTRG. 22312. 3  | 545  | 0. 4638  | 8. 121887207 | 1  |
| MSTRG. 22312. 2  | 222  | 0. 41295 | 8. 806945801 | 1  |
| MSTRG. 22306. 4  | 24   | 0. 37633 | 9. 349304199 | 1  |
| MSTRG. 22315. 1  | 86   | 0. 45175 | 9. 577209473 | 1  |
| MSTRG. 22306. 5  | 3    | 0. 36156 | 3. 799377441 | 1  |
| MSTRG. 22306. 7  | 3    | 0. 34503 | 3. 799377441 | 1  |
| MSTRG. 22306. 8  | 3    | 0. 35889 | 3. 799377441 | 1  |
| MSTRG. 22306. 6  | 3    | 0. 39961 | 3. 799377441 | 1  |
| MSTRG. 22306. 9  | 3    | 0. 40577 | 3. 799377441 | 1  |
| MSTRG. 22306. 11 | 9    | 0. 40751 | 5. 972106934 | 1  |
| MSTRG. 22295. 1  | 453  | 0. 35136 | 9. 048522949 | 1  |
| MSTRG. 22295. 3  | 31   | 0. 39004 | 8. 023742676 | 1  |
| MSTRG. 22299. 3  | 230  | 0. 47344 | 4. 72064209  | 1  |
| MSTRG. 22300. 1  | 134  | 0. 4291  | 4. 739562988 | 1  |
| MSTRG. 22300. 3  | 148  | 0. 38829 | 4. 781066895 | 1  |
| MSTRG. 22300. 4  | 62   | 0. 46036 | 7. 777770996 | -1 |
| MSTRG. 22316. 1  | 210  | 0. 27469 | 11. 76422119 | 1  |
| MSTRG. 22316. 2  | 180  | 0. 30706 | 12. 18670654 | 1  |
| MSTRG. 22319. 2  | 181  | 0. 45643 | 9. 488830566 | 1  |
| MSTRG. 22319. 3  | 122  | 0. 48716 | 5. 879943848 | 1  |
| MSTRG. 22332. 7  | 561  | 0. 29826 | 8. 808532715 | 1  |

|                  |      |          |              |    |
|------------------|------|----------|--------------|----|
| MSTRG. 22326. 2  | 352  | 0. 35974 | 5. 768249512 | 1  |
| MSTRG. 22327. 1  | 377  | 0. 35275 | 8. 186950684 | 1  |
| MSTRG. 22327. 3  | 568  | 0. 38259 | 5. 944763184 | 1  |
| MSTRG. 22325. 1  | 152  | 0. 31054 | 8. 823669434 | 1  |
| MSTRG. 22335. 2  | 294  | 0. 38169 | 8. 657531738 | -1 |
| MSTRG. 22335. 3  | 288  | 0. 3567  | 8. 379699707 | -1 |
| MSTRG. 22341. 2  | 167  | 0. 31837 | 11. 33660889 | 1  |
| MSTRG. 22341. 3  | 234  | 0. 22904 | 7. 544372559 | 1  |
| MSTRG. 22344. 1  | 340  | 0. 44766 | 5. 811828613 | 1  |
| MSTRG. 22344. 2  | 340  | 0. 44113 | 5. 811828613 | 1  |
| MSTRG. 22344. 4  | 340  | 0. 43779 | 5. 811828613 | 1  |
| MSTRG. 22344. 5  | 295  | 0. 45146 | 8. 181091309 | -1 |
| MSTRG. 22344. 7  | 218  | 0. 47409 | 5. 632263184 | -1 |
| MSTRG. 22344. 9  | 379  | 0. 43741 | 5. 425964355 | 1  |
| MSTRG. 22346. 1  | 47   | 0. 33511 | 6. 032043457 | 1  |
| MSTRG. 22344. 11 | 45   | 0. 38419 | 6. 542541504 | 1  |
| MSTRG. 22338. 2  | 696  | 0. 38717 | 5. 996154785 | 1  |
| MSTRG. 22338. 4  | 110  | 0. 38367 | 6. 679504395 | -1 |
| MSTRG. 22340. 2  | 67   | 0. 3215  | 8. 886779785 | 1  |
| MSTRG. 22348. 3  | 162  | 0. 30124 | 5. 725036621 | 1  |
| MSTRG. 22355. 2  | 148  | 0. 34639 | 8. 575622559 | 1  |
| MSTRG. 22356. 1  | 367  | 0. 42537 | 10. 41204834 | 1  |
| MSTRG. 22356. 4  | 501  | 0. 47193 | 8. 793640137 | 1  |
| MSTRG. 22356. 5  | 364  | 0. 449   | 10. 29193115 | 1  |
| MSTRG. 22356. 3  | 376  | 0. 41607 | 10. 29193115 | 1  |
| MSTRG. 22351. 2  | 513  | 0. 42726 | 5. 409362793 | 1  |
| MSTRG. 22351. 3  | 513  | 0. 42931 | 5. 409362793 | 1  |
| MSTRG. 22358. 2  | 108  | 0. 34766 | 9. 147399902 | 1  |
| MSTRG. 22359. 2  | 2069 | 0. 42098 | 6. 506530762 | 1  |
| MSTRG. 22361. 2  | 144  | 0. 33498 | 7. 866638184 | 1  |
| MSTRG. 22370. 2  | 745  | 0. 43511 | 5. 878234863 | 1  |
| MSTRG. 22370. 4  | 591  | 0. 41921 | 6. 01373291  | 1  |
| MSTRG. 22378. 3  | 798  | 0. 41037 | 8. 410949707 | 1  |
| MSTRG. 22378. 5  | 810  | 0. 41925 | 8. 764953613 | 1  |
| MSTRG. 22378. 6  | 819  | 0. 41692 | 8. 40802002  | 1  |
| MSTRG. 22378. 7  | 798  | 0. 45337 | 8. 410949707 | 1  |
| MSTRG. 22367. 3  | 520  | 0. 46367 | 9. 24810791  | 1  |
| MSTRG. 22367. 4  | 484  | 0. 37201 | 9. 16595459  | 1  |
| MSTRG. 22367. 5  | 261  | 0. 26902 | 10. 45379639 | 1  |
| MSTRG. 22382. 1  | 544  | 0. 34856 | 5. 148010254 | 1  |
| MSTRG. 22382. 4  | 578  | 0. 32323 | 5. 55682373  | 1  |
| MSTRG. 22382. 5  | 243  | 0. 35844 | 4. 735168457 | 1  |
| MSTRG. 22382. 8  | 445  | 0. 35414 | 5. 042785645 | 1  |
| MSTRG. 22382. 6  | 578  | 0. 35011 | 5. 55682373  | 1  |
| MSTRG. 22382. 7  | 578  | 0. 31376 | 5. 55682373  | 1  |
| MSTRG. 22382. 9  | 578  | 0. 31438 | 5. 55682373  | 1  |
| MSTRG. 22383. 1  | 358  | 0. 41398 | 8. 938049316 | 1  |
| MSTRG. 22383. 2  | 358  | 0. 41398 | 8. 938049316 | 1  |
| MSTRG. 22383. 3  | 358  | 0. 41398 | 8. 938049316 | 1  |
| MSTRG. 22383. 4  | 358  | 0. 41398 | 9. 016784668 | 1  |
| MSTRG. 22390. 8  | 560  | 0. 38689 | 8. 729187012 | 1  |
| MSTRG. 22390. 7  | 573  | 0. 44117 | 8. 471374512 | 1  |
| MSTRG. 22390. 6  | 886  | 0. 45596 | 8. 52545166  | 1  |
| MSTRG. 22390. 2  | 938  | 0. 45596 | 8. 628967285 | 1  |



|                  |      |          |              |    |
|------------------|------|----------|--------------|----|
| MSTRG. 22391. 2  | 108  | 0. 42557 | 12. 10028076 | 1  |
| MSTRG. 22391. 4  | 108  | 0. 41043 | 12. 10028076 | 1  |
| MSTRG. 22392. 2  | 232  | 0. 30359 | 9. 485900879 | 1  |
| MSTRG. 22392. 4  | 57   | 0. 36805 | 12. 22198486 | 1  |
| MSTRG. 22394. 2  | 87   | 0. 33648 | 5. 515075684 | 1  |
| MSTRG. 22394. 3  | 231  | 0. 44709 | 4. 907897949 | 1  |
| MSTRG. 22385. 2  | 378  | 0. 37057 | 6. 212341309 | 1  |
| MSTRG. 22386. 2  | 439  | 0. 42544 | 10. 0088501  | 1  |
| MSTRG. 22397. 2  | 425  | 0. 38719 | 6. 38067627  | 1  |
| MSTRG. 22397. 3  | 425  | 0. 40769 | 6. 38067627  | 1  |
| MSTRG. 22397. 4  | 488  | 0. 38663 | 6. 62713623  | 1  |
| MSTRG. 22398. 1  | 272  | 0. 45064 | 5. 610168457 | 1  |
| MSTRG. 22399. 1  | 893  | 0. 39208 | 6. 411682129 | 1  |
| MSTRG. 22399. 2  | 866  | 0. 38464 | 6. 295593262 | 1  |
| MSTRG. 22400. 1  | 151  | 0. 28628 | 10. 4430542  | 1  |
| MSTRG. 22402. 2  | 198  | 0. 40134 | 9. 233215332 | 1  |
| MSTRG. 22402. 3  | 147  | 0. 41832 | 9. 270690918 | 1  |
| MSTRG. 22403. 1  | 199  | 0. 29566 | 11. 56878662 | 1  |
| MSTRG. 22406. 2  | 156  | 0. 45939 | 6. 356994629 | 1  |
| MSTRG. 22406. 5  | 209  | 0. 4624  | 4. 85369873  | 1  |
| MSTRG. 22411. 2  | 428  | 0. 40751 | 6. 415466309 | 1  |
| MSTRG. 22411. 1  | 409  | 0. 38277 | 7. 488342285 | 1  |
| MSTRG. 22407. 1  | 245  | 0. 35419 | 9. 184875488 | 1  |
| MSTRG. 22407. 2  | 480  | 0. 3669  | 9. 241027832 | 1  |
| MSTRG. 22408. 1  | 108  | 0. 32907 | 11. 2723999  | 1  |
| MSTRG. 22419. 1  | 184  | 0. 3432  | 9. 969055176 | -1 |
| MSTRG. 22420. 1  | 53   | 0. 33351 | 7. 977600098 | 1  |
| MSTRG. 22417. 1  | 41   | 0. 3332  | 5. 194885254 | 1  |
| MSTRG. 22417. 2  | 72   | 0. 36499 | 4. 879699707 | 1  |
| MSTRG. 22426. 1  | 73   | 0. 38283 | 11. 01019287 | 1  |
| MSTRG. 22428. 2  | 695  | 0. 45024 | 6. 153137207 | 1  |
| MSTRG. 22430. 2  | 650  | 0. 33533 | 5. 242614746 | 1  |
| MSTRG. 22435. 2  | 1079 | 0. 40691 | 6. 207946777 | 1  |
| MSTRG. 22431. 1  | 195  | 0. 34857 | 9. 226989746 | 1  |
| MSTRG. 22444. 7  | 370  | 0. 45869 | 8. 036193848 | 1  |
| MSTRG. 22444. 5  | 479  | 0. 48432 | 6. 085510254 | 1  |
| MSTRG. 22449. 1  | 968  | 0. 46516 | 5. 304748535 | 1  |
| MSTRG. 22444. 10 | 35   | 0. 28167 | 11. 699646   | 1  |
| MSTRG. 22449. 3  | 968  | 0. 49008 | 5. 304748535 | 1  |
| MSTRG. 22449. 4  | 968  | 0. 47816 | 5. 304748535 | 1  |
| MSTRG. 22449. 5  | 968  | 0. 48238 | 5. 304748535 | 1  |
| MSTRG. 22449. 9  | 968  | 0. 49008 | 5. 304748535 | 1  |
| MSTRG. 22449. 10 | 968  | 0. 47573 | 5. 304748535 | 1  |
| MSTRG. 22451. 3  | 878  | 0. 3507  | 6. 09185791  | 1  |
| MSTRG. 22451. 8  | 878  | 0. 3712  | 6. 09185791  | 1  |
| MSTRG. 22451. 5  | 878  | 0. 37281 | 6. 09185791  | 1  |
| MSTRG. 22451. 9  | 878  | 0. 35231 | 6. 09185791  | 1  |
| MSTRG. 22451. 13 | 186  | 0. 43498 | 6. 594665527 | 1  |
| MSTRG. 22451. 14 | 878  | 0. 46288 | 6. 09185791  | 1  |
| MSTRG. 22451. 11 | 878  | 0. 46288 | 6. 09185791  | 1  |
| MSTRG. 22451. 12 | 878  | 0. 4654  | 6. 09185791  | 1  |
| MSTRG. 22442. 1  | 73   | 0. 34295 | 10. 39910889 | 1  |
| MSTRG. 22459. 3  | 228  | 0. 28432 | 7. 090881348 | 1  |
| MSTRG. 22459. 1  | 388  | 0. 29238 | 8. 616638184 | 1  |

|                  |     |          |              |    |
|------------------|-----|----------|--------------|----|
| MSTRG. 22459. 4  | 431 | 0. 28191 | 8. 680725098 | 1  |
| MSTRG. 22459. 5  | 388 | 0. 29703 | 8. 616638184 | 1  |
| MSTRG. 22459. 6  | 917 | 0. 40002 | 8. 869445801 | 1  |
| MSTRG. 22460. 1  | 130 | 0. 29857 | 10. 54547119 | 1  |
| MSTRG. 22460. 2  | 130 | 0. 32523 | 10. 54547119 | 1  |
| MSTRG. 22461. 1  | 151 | 0. 34147 | 5. 189758301 | 1  |
| MSTRG. 22461. 2  | 71  | 0. 37113 | 4. 78692627  | 1  |
| MSTRG. 22461. 4  | 82  | 0. 34844 | 11. 92462158 | 1  |
| MSTRG. 22461. 5  | 71  | 0. 37793 | 4. 78692627  | 1  |
| MSTRG. 22461. 6  | 141 | 0. 31388 | 5. 296813965 | 1  |
| MSTRG. 22454. 1  | 128 | 0. 32974 | 7. 691223145 | 1  |
| MSTRG. 22454. 2  | 95  | 0. 39551 | 9. 403015137 | 1  |
| MSTRG. 22455. 3  | 638 | 0. 36995 | 5. 450134277 | 1  |
| MSTRG. 22464. 1  | 94  | 0. 29772 | 9. 767272949 | 1  |
| MSTRG. 22465. 1  | 181 | 0. 26845 | 6. 114196777 | 1  |
| MSTRG. 22466. 1  | 79  | 0. 31348 | 8. 406433105 | 1  |
| MSTRG. 22478. 3  | 592 | 0. 47377 | 5. 284362793 | 1  |
| MSTRG. 22478. 2  | 580 | 0. 3765  | 5. 703308105 | 1  |
| MSTRG. 22478. 4  | 594 | 0. 48225 | 5. 71282959  | 1  |
| MSTRG. 22478. 5  | 580 | 0. 37569 | 5. 643615723 | 1  |
| MSTRG. 22478. 7  | 596 | 0. 37349 | 7. 092224121 | 1  |
| MSTRG. 22478. 6  | 634 | 0. 39604 | 5. 683654785 | 1  |
| MSTRG. 22478. 10 | 634 | 0. 47144 | 5. 683654785 | 1  |
| MSTRG. 22478. 11 | 594 | 0. 46404 | 5. 801818848 | 1  |
| MSTRG. 22480. 1  | 122 | 0. 32646 | 10. 49517822 | 1  |
| MSTRG. 22482. 1  | 21  | 0. 33199 | 5. 426330566 | 1  |
| MSTRG. 22490. 1  | 339 | 0. 46572 | 8. 17755127  | 1  |
| MSTRG. 22490. 2  | 265 | 0. 46551 | 9. 096984863 | 1  |
| MSTRG. 22490. 3  | 378 | 0. 48964 | 8. 355651855 | 1  |
| MSTRG. 22490. 4  | 175 | 0. 38177 | 7. 747253418 | 1  |
| MSTRG. 22490. 5  | 271 | 0. 45859 | 9. 000793457 | 1  |
| MSTRG. 22490. 6  | 187 | 0. 46264 | 9. 219299316 | 1  |
| MSTRG. 22490. 7  | 451 | 0. 48013 | 7. 16973877  | 1  |
| MSTRG. 22490. 9  | 253 | 0. 42722 | 8. 76361084  | 1  |
| MSTRG. 22468. 1  | 58  | 0. 38988 | 5. 631774902 | 1  |
| MSTRG. 22469. 1  | 104 | 0. 34622 | 8. 598693848 | -1 |
| MSTRG. 22476. 1  | 39  | 0. 45359 | 9. 496520996 | 1  |
| MSTRG. 22477. 1  | 352 | 0. 4861  | 9. 196472168 | -1 |
| MSTRG. 22519. 1  | 548 | 0. 4461  | 6. 19329834  | 1  |
| MSTRG. 22521. 1  | 69  | 0. 28068 | 9. 51739502  | 1  |
| MSTRG. 22517. 1  | 42  | 0. 34485 | 6. 069152832 | -1 |
| MSTRG. 22517. 2  | 145 | 0. 31974 | 9. 313049316 | 1  |
| MSTRG. 22517. 3  | 115 | 0. 28415 | 7. 530578613 | 1  |
| MSTRG. 22524. 1  | 90  | 0. 36185 | 9. 659118652 | 1  |
| MSTRG. 22526. 1  | 334 | 0. 45751 | 4. 919494629 | 1  |
| MSTRG. 22539. 1  | 85  | 0. 36495 | 9. 075744629 | 1  |
| MSTRG. 22542. 2  | 377 | 0. 40971 | 6. 486999512 | 1  |
| MSTRG. 22544. 1  | 43  | 0. 33976 | 4. 512512207 | 1  |
| MSTRG. 22544. 2  | 43  | 0. 3485  | 4. 512512207 | 1  |
| MSTRG. 22528. 1  | 54  | 0. 39917 | 9. 29888916  | -1 |
| MSTRG. 22530. 1  | 74  | 0. 40647 | 11. 13287354 | 1  |
| MSTRG. 22549. 1  | 139 | 0. 28224 | 7. 762023926 | 1  |
| MSTRG. 22549. 2  | 139 | 0. 28224 | 7. 762023926 | 1  |
| MSTRG. 22551. 3  | 49  | 0. 4155  | 10. 04400635 | 1  |

|                 |      |          |              |   |
|-----------------|------|----------|--------------|---|
| MSTRG. 22551. 2 | 74   | 0. 35389 | 6. 633361816 | 1 |
| MSTRG. 22551. 4 | 55   | 0. 33123 | 6. 897521973 | 1 |
| MSTRG. 22551. 5 | 44   | 0. 34557 | 4. 501037598 | 1 |
| MSTRG. 22552. 2 | 323  | 0. 47029 | 8. 745788574 | 1 |
| MSTRG. 22550. 2 | 595  | 0. 40333 | 4. 258972168 | 1 |
| MSTRG. 22553. 3 | 396  | 0. 37903 | 8. 137268066 | 1 |
| MSTRG. 22563. 1 | 597  | 0. 32582 | 5. 533630371 | 1 |
| MSTRG. 22563. 3 | 92   | 0. 31137 | 10. 74359131 | 1 |
| MSTRG. 22564. 3 | 223  | 0. 39776 | 6. 729309082 | 1 |
| MSTRG. 22572. 1 | 1262 | 0. 42465 | 6. 389099121 | 1 |
| MSTRG. 22574. 1 | 105  | 0. 28096 | 9. 256652832 | 1 |
| MSTRG. 22572. 2 | 1262 | 0. 43441 | 6. 389099121 | 1 |
| MSTRG. 22572. 3 | 1262 | 0. 4263  | 6. 389099121 | 1 |
| MSTRG. 22576. 1 | 73   | 0. 32442 | 9. 37689209  | 1 |
| MSTRG. 22580. 1 | 99   | 0. 36086 | 8. 676208496 | 1 |
| MSTRG. 22579. 3 | 21   | 0. 38336 | 11. 71136475 | 1 |
| MSTRG. 22579. 4 | 28   | 0. 38339 | 9. 500671387 | 1 |
| MSTRG. 22583. 2 | 76   | 0. 44926 | 4. 144958496 | 1 |
| MSTRG. 22583. 5 | 76   | 0. 43771 | 4. 144958496 | 1 |
| MSTRG. 22592. 2 | 478  | 0. 42166 | 6. 309509277 | 1 |
| MSTRG. 22592. 3 | 478  | 0. 42166 | 6. 309509277 | 1 |
| MSTRG. 22592. 4 | 542  | 0. 42166 | 6. 554626465 | 1 |
| MSTRG. 22585. 2 | 104  | 0. 46227 | 9. 414245605 | 1 |
| MSTRG. 22585. 1 | 104  | 0. 44076 | 6. 405822754 | 1 |
| MSTRG. 22593. 4 | 1052 | 0. 45764 | 8. 83026123  | 1 |
| MSTRG. 22598. 2 | 541  | 0. 42942 | 8. 969055176 | 1 |
| MSTRG. 22598. 4 | 507  | 0. 40542 | 8. 708557129 | 1 |
| MSTRG. 22599. 1 | 211  | 0. 37128 | 8. 809875488 | 1 |
| MSTRG. 22599. 2 | 211  | 0. 34825 | 8. 809875488 | 1 |
| MSTRG. 22599. 3 | 211  | 0. 37509 | 8. 809875488 | 1 |
| MSTRG. 22599. 4 | 60   | 0. 35603 | 7. 621643066 | 1 |
| MSTRG. 22599. 5 | 211  | 0. 29456 | 8. 809875488 | 1 |
| MSTRG. 22605. 1 | 431  | 0. 34939 | 11. 19647217 | 1 |
| MSTRG. 22607. 3 | 138  | 0. 29152 | 6. 818786621 | 1 |
| MSTRG. 22609. 1 | 82   | 0. 30743 | 10. 00189209 | 1 |
| MSTRG. 22608. 2 | 479  | 0. 30041 | 8. 504699707 | 1 |
| MSTRG. 22610. 1 | 186  | 0. 30962 | 8. 953918457 | 1 |
| MSTRG. 22610. 2 | 107  | 0. 29459 | 6. 797790527 | 1 |
| MSTRG. 22611. 1 | 143  | 0. 31412 | 10. 5848999  | 1 |
| MSTRG. 22612. 1 | 139  | 0. 27327 | 10. 71954346 | 1 |
| MSTRG. 22608. 4 | 479  | 0. 35917 | 8. 504699707 | 1 |
| MSTRG. 22617. 3 | 82   | 0. 30132 | 10. 08648682 | 1 |
| MSTRG. 22617. 1 | 82   | 0. 29857 | 10. 08648682 | 1 |
| MSTRG. 22617. 4 | 82   | 0. 30132 | 10. 08648682 | 1 |
| MSTRG. 22618. 1 | 99   | 0. 34017 | 4. 68157959  | 1 |
| MSTRG. 22627. 2 | 1201 | 0. 28746 | 7. 347229004 | 1 |
| MSTRG. 22627. 3 | 1214 | 0. 44853 | 7. 550720215 | 1 |
| MSTRG. 22627. 4 | 1200 | 0. 45973 | 7. 551330566 | 1 |
| MSTRG. 22627. 5 | 1200 | 0. 45632 | 7. 347229004 | 1 |
| MSTRG. 22627. 6 | 1204 | 0. 4498  | 7. 552429199 | 1 |
| MSTRG. 22627. 7 | 1203 | 0. 45632 | 7. 552429199 | 1 |
| MSTRG. 22627. 8 | 1189 | 0. 45018 | 7. 553039551 | 1 |
| MSTRG. 22621. 2 | 85   | 0. 40072 | 4. 826721191 | 1 |
| MSTRG. 22624. 2 | 426  | 0. 46078 | 6. 378845215 | 1 |

|                 |      |          |              |    |
|-----------------|------|----------|--------------|----|
| MSTRG. 22633. 4 | 415  | 0. 44409 | 8. 457214355 | 1  |
| MSTRG. 22634. 3 | 125  | 0. 31824 | 7. 707824707 | 1  |
| MSTRG. 22644. 1 | 184  | 0. 27274 | 10. 00860596 | 1  |
| MSTRG. 22644. 4 | 135  | 0. 39207 | 9. 719543457 | 1  |
| MSTRG. 22644. 5 | 102  | 0. 37538 | 9. 892028809 | 1  |
| MSTRG. 22644. 3 | 135  | 0. 36171 | 9. 719543457 | 1  |
| MSTRG. 22646. 1 | 66   | 0. 30132 | 5. 160461426 | 1  |
| MSTRG. 22646. 2 | 123  | 0. 33911 | 11. 33599854 | 1  |
| MSTRG. 22646. 4 | 79   | 0. 30981 | 9. 645935059 | 1  |
| MSTRG. 22650. 1 | 47   | 0. 38378 | 6. 222717285 | 1  |
| MSTRG. 22650. 5 | 47   | 0. 31824 | 6. 222717285 | 1  |
| MSTRG. 22650. 6 | 64   | 0. 30988 | 11. 15997314 | 1  |
| MSTRG. 22650. 3 | 57   | 0. 37477 | 8. 657775879 | -1 |
| MSTRG. 22650. 4 | 57   | 0. 36219 | 8. 657775879 | -1 |
| MSTRG. 22650. 7 | 47   | 0. 3376  | 6. 222717285 | 1  |
| MSTRG. 22639. 2 | 414  | 0. 42016 | 4. 636779785 | 1  |
| MSTRG. 22651. 3 | 572  | 0. 50404 | 5. 648254395 | 1  |
| MSTRG. 22651. 4 | 404  | 0. 44616 | 6. 496276855 | 1  |
| MSTRG. 22651. 5 | 439  | 0. 4323  | 6. 885681152 | 1  |
| MSTRG. 22651. 6 | 436  | 0. 4323  | 6. 885681152 | 1  |
| MSTRG. 22651. 7 | 407  | 0. 44616 | 6. 496276855 | 1  |
| MSTRG. 22654. 1 | 103  | 0. 39104 | 5. 180236816 | 1  |
| MSTRG. 22656. 1 | 178  | 0. 27869 | 8. 59197998  | 1  |
| MSTRG. 22660. 2 | 104  | 0. 39986 | 8. 949645996 | -1 |
| MSTRG. 22668. 2 | 318  | 0. 38979 | 6. 128723145 | -1 |
| MSTRG. 22664. 1 | 431  | 0. 44239 | 6. 625427246 | 1  |
| MSTRG. 22683. 4 | 313  | 0. 34806 | 8. 994689941 | 1  |
| MSTRG. 22684. 1 | 239  | 0. 29946 | 11. 11175537 | 1  |
| MSTRG. 22686. 2 | 2565 | 0. 44945 | 6. 67755127  | 1  |
| MSTRG. 22686. 3 | 2565 | 0. 44597 | 6. 67755127  | 1  |
| MSTRG. 22689. 1 | 169  | 0. 27439 | 11. 25689697 | 1  |
| MSTRG. 22679. 1 | 166  | 0. 28305 | 12. 034729   | 1  |
| MSTRG. 22703. 3 | 196  | 0. 47164 | 7. 774475098 | 1  |
| MSTRG. 22703. 2 | 196  | 0. 45124 | 7. 774475098 | 1  |
| MSTRG. 22709. 2 | 348  | 0. 3832  | 9. 889221191 | 1  |
| MSTRG. 22713. 1 | 514  | 0. 32617 | 6. 068908691 | 1  |
| MSTRG. 22713. 5 | 608  | 0. 4522  | 6. 09967041  | 1  |
| MSTRG. 22713. 4 | 608  | 0. 4371  | 6. 09967041  | 1  |
| MSTRG. 22714. 1 | 111  | 0. 35788 | 6. 259216309 | 1  |
| MSTRG. 22694. 2 | 390  | 0. 3276  | 6. 722961426 | 1  |
| MSTRG. 22718. 1 | 87   | 0. 30132 | 8. 81829834  | 1  |
| MSTRG. 22718. 2 | 240  | 0. 27937 | 11. 08868408 | 1  |
| MSTRG. 22718. 3 | 81   | 0. 2921  | 10. 65106201 | 1  |
| MSTRG. 22718. 4 | 142  | 0. 3287  | 11. 49676514 | 1  |
| MSTRG. 22721. 1 | 86   | 0. 31997 | 11. 49310303 | 1  |
| MSTRG. 22722. 1 | 137  | 0. 33643 | 9. 804016113 | 1  |
| MSTRG. 22725. 1 | 56   | 0. 30806 | 9. 18536377  | 1  |
| MSTRG. 22731. 2 | 523  | 0. 40998 | 8. 242126465 | 1  |
| MSTRG. 22733. 1 | 88   | 0. 38536 | 4. 61138916  | 1  |
| MSTRG. 22733. 2 | 88   | 0. 35766 | 4. 61138916  | 1  |
| MSTRG. 22737. 2 | 223  | 0. 32823 | 8. 79095459  | 1  |
| MSTRG. 22739. 1 | 64   | 0. 31255 | 6. 801940918 | 1  |
| MSTRG. 22740. 1 | 271  | 0. 38054 | 6. 13104248  | -1 |
| MSTRG. 22740. 2 | 271  | 0. 38512 | 6. 13104248  | -1 |

|                 |      |          |              |    |
|-----------------|------|----------|--------------|----|
| MSTRG. 22740. 4 | 152  | 0. 40984 | 6. 183898926 | 1  |
| MSTRG. 22742. 1 | 722  | 0. 48128 | 6. 627258301 | 1  |
| MSTRG. 22742. 2 | 398  | 0. 38508 | 8. 332214355 | 1  |
| MSTRG. 22744. 2 | 782  | 0. 45557 | 7. 129577637 | 1  |
| MSTRG. 22744. 3 | 507  | 0. 43788 | 8. 824157715 | 1  |
| MSTRG. 22744. 5 | 637  | 0. 39041 | 6. 738952637 | 1  |
| MSTRG. 22744. 4 | 1237 | 0. 45633 | 8. 994445801 | 1  |
| MSTRG. 22744. 6 | 874  | 0. 45819 | 8. 853942871 | 1  |
| MSTRG. 22744. 8 | 355  | 0. 40365 | 10. 17913818 | 1  |
| MSTRG. 22746. 1 | 1032 | 0. 45323 | 7. 49798584  | 1  |
| MSTRG. 22747. 1 | 228  | 0. 46435 | 6. 070495605 | 1  |
| MSTRG. 22747. 3 | 87   | 0. 29476 | 9. 298522949 | 1  |
| MSTRG. 22747. 4 | 693  | 0. 46602 | 7. 046203613 | 1  |
| MSTRG. 22749. 4 | 304  | 0. 28883 | 5. 918029785 | 1  |
| MSTRG. 22750. 5 | 77   | 0. 34808 | 6. 558288574 | 1  |
| MSTRG. 22755. 1 | 70   | 0. 33007 | 8. 448181152 | 1  |
| MSTRG. 22763. 2 | 607  | 0. 37717 | 6. 848205566 | 1  |
| MSTRG. 22763. 4 | 659  | 0. 40702 | 6. 554870605 | 1  |
| MSTRG. 22763. 5 | 580  | 0. 4247  | 6. 621032715 | 1  |
| MSTRG. 22763. 6 | 639  | 0. 40034 | 6. 905700684 | 1  |
| MSTRG. 22764. 1 | 651  | 0. 43867 | 5. 85760498  | 1  |
| MSTRG. 22764. 3 | 482  | 0. 47404 | 4. 990661621 | 1  |
| MSTRG. 22770. 2 | 953  | 0. 3723  | 5. 492614746 | 1  |
| MSTRG. 22774. 1 | 38   | 0. 4474  | 4. 895812988 | 1  |
| MSTRG. 22776. 1 | 71   | 0. 33291 | 9. 646911621 | 1  |
| MSTRG. 22779. 1 | 56   | 0. 3818  | 8. 978820801 | 1  |
| MSTRG. 22780. 1 | 79   | 0. 43413 | 9. 261901855 | 1  |
| MSTRG. 22790. 3 | 2294 | 0. 45366 | 7. 012268066 | 1  |
| MSTRG. 22790. 4 | 2866 | 0. 47804 | 6. 467468262 | 1  |
| MSTRG. 22790. 5 | 2278 | 0. 4462  | 6. 76373291  | 1  |
| MSTRG. 22793. 1 | 155  | 0. 3726  | 11. 02520752 | 1  |
| MSTRG. 22798. 3 | 858  | 0. 43565 | 5. 698791504 | 1  |
| MSTRG. 22800. 5 | 292  | 0. 40365 | 9. 337463379 | 1  |
| MSTRG. 22800. 3 | 292  | 0. 43167 | 9. 337463379 | 1  |
| MSTRG. 22784. 1 | 1270 | 0. 4779  | 5. 375671387 | 1  |
| MSTRG. 22785. 4 | 491  | 0. 32257 | 5. 902282715 | 1  |
| MSTRG. 22785. 5 | 238  | 0. 37411 | 4. 676940918 | 1  |
| MSTRG. 22785. 6 | 128  | 0. 29268 | 6. 485656738 | 1  |
| MSTRG. 22786. 1 | 53   | 0. 37914 | 10. 75018311 | 1  |
| MSTRG. 22787. 1 | 83   | 0. 35748 | 5. 889343262 | 1  |
| MSTRG. 22789. 2 | 64   | 0. 35727 | 9. 687805176 | 1  |
| MSTRG. 22803. 1 | 116  | 0. 35494 | 8. 721374512 | 1  |
| MSTRG. 22804. 1 | 453  | 0. 45774 | 5. 365661621 | -1 |
| MSTRG. 22804. 3 | 453  | 0. 46823 | 5. 365661621 | -1 |
| MSTRG. 22804. 4 | 453  | 0. 45798 | 5. 365661621 | -1 |
| MSTRG. 22806. 2 | 39   | 0. 46685 | 7. 366027832 | 1  |
| MSTRG. 22811. 1 | 548  | 0. 41803 | 6. 001037598 | 1  |
| MSTRG. 22812. 3 | 354  | 0. 34386 | 5. 615783691 | 1  |
| MSTRG. 22813. 1 | 261  | 0. 27379 | 8. 720275879 | 1  |
| MSTRG. 22814. 2 | 931  | 0. 46467 | 6. 077575684 | 1  |
| MSTRG. 22818. 2 | 819  | 0. 47404 | 5. 499694824 | 1  |
| MSTRG. 22819. 2 | 388  | 0. 42922 | 5. 327575684 | 1  |
| MSTRG. 22819. 1 | 389  | 0. 36196 | 5. 327575684 | 1  |
| MSTRG. 22822. 2 | 130  | 0. 42228 | 9. 158752441 | 1  |

|                  |      |          |              |   |
|------------------|------|----------|--------------|---|
| MSTRG. 22822. 3  | 130  | 0. 47619 | 9. 158752441 | 1 |
| MSTRG. 22825. 1  | 253  | 0. 35156 | 5. 204772949 | 1 |
| MSTRG. 22825. 7  | 118  | 0. 40413 | 4. 774108887 | 1 |
| MSTRG. 22825. 5  | 253  | 0. 44465 | 5. 204772949 | 1 |
| MSTRG. 22825. 6  | 253  | 0. 41096 | 5. 204772949 | 1 |
| MSTRG. 22827. 1  | 84   | 0. 33578 | 11. 00006104 | 1 |
| MSTRG. 22829. 3  | 119  | 0. 34455 | 4. 522521973 | 1 |
| MSTRG. 22829. 4  | 119  | 0. 3277  | 4. 522521973 | 1 |
| MSTRG. 22829. 2  | 152  | 0. 31056 | 4. 309509277 | 1 |
| MSTRG. 22824. 1  | 458  | 0. 35832 | 6. 989440918 | 1 |
| MSTRG. 22832. 5  | 108  | 0. 42811 | 4. 768859863 | 1 |
| MSTRG. 22832. 6  | 311  | 0. 4104  | 5. 226745605 | 1 |
| MSTRG. 22832. 4  | 310  | 0. 40041 | 5. 226745605 | 1 |
| MSTRG. 22833. 2  | 277  | 0. 42469 | 4. 88067627  | 1 |
| MSTRG. 22833. 3  | 277  | 0. 43813 | 4. 88067627  | 1 |
| MSTRG. 22841. 2  | 663  | 0. 44189 | 7. 808044434 | 1 |
| MSTRG. 22841. 3  | 663  | 0. 38598 | 7. 808044434 | 1 |
| MSTRG. 22842. 8  | 694  | 0. 49342 | 6. 313171387 | 1 |
| MSTRG. 22842. 9  | 855  | 0. 46521 | 7. 621032715 | 1 |
| MSTRG. 22842. 10 | 906  | 0. 42995 | 8. 397033691 | 1 |
| MSTRG. 22842. 12 | 802  | 0. 43101 | 6. 324035645 | 1 |
| MSTRG. 22842. 13 | 945  | 0. 43101 | 8. 111022949 | 1 |
| MSTRG. 22835. 1  | 560  | 0. 41084 | 7. 964904785 | 1 |
| MSTRG. 22835. 2  | 627  | 0. 46717 | 7. 07989502  | 1 |
| MSTRG. 22836. 1  | 130  | 0. 31285 | 10. 29217529 | 1 |
| MSTRG. 22838. 4  | 202  | 0. 4253  | 7. 535705566 | 1 |
| MSTRG. 22838. 5  | 202  | 0. 44597 | 7. 535705566 | 1 |
| MSTRG. 22838. 3  | 202  | 0. 41744 | 7. 535705566 | 1 |
| MSTRG. 22838. 2  | 216  | 0. 36274 | 9. 194763184 | 1 |
| MSTRG. 22845. 2  | 213  | 0. 30051 | 6. 487731934 | 1 |
| MSTRG. 22847. 3  | 449  | 0. 46376 | 8. 56463623  | 1 |
| MSTRG. 22857. 1  | 456  | 0. 49129 | 4. 931945801 | 1 |
| MSTRG. 22857. 2  | 229  | 0. 44677 | 9. 257507324 | 1 |
| MSTRG. 22858. 3  | 2377 | 0. 48466 | 6. 588439941 | 1 |
| MSTRG. 22858. 5  | 2378 | 0. 47231 | 6. 588439941 | 1 |
| MSTRG. 22858. 6  | 2376 | 0. 48666 | 6. 653259277 | 1 |
| MSTRG. 22858. 7  | 2377 | 0. 48666 | 6. 588439941 | 1 |
| MSTRG. 22858. 8  | 2375 | 0. 48466 | 6. 653259277 | 1 |
| MSTRG. 22858. 10 | 2382 | 0. 47696 | 6. 653625488 | 1 |
| MSTRG. 22858. 4  | 2371 | 0. 48466 | 6. 58795166  | 1 |
| MSTRG. 22858. 9  | 2377 | 0. 47696 | 6. 588439941 | 1 |
| MSTRG. 22867. 1  | 799  | 0. 47819 | 4. 566467285 | 1 |
| MSTRG. 22871. 1  | 78   | 0. 32553 | 9. 443908691 | 1 |
| MSTRG. 22871. 2  | 36   | 0. 43394 | 10. 02435303 | 1 |
| MSTRG. 22881. 2  | 796  | 0. 47802 | 4. 743713379 | 1 |
| MSTRG. 22881. 3  | 599  | 0. 48159 | 5. 186340332 | 1 |
| MSTRG. 22892. 2  | 275  | 0. 36693 | 8. 84967041  | 1 |
| MSTRG. 22892. 4  | 275  | 0. 36693 | 8. 84967041  | 1 |
| MSTRG. 22892. 5  | 98   | 0. 29527 | 9. 429992676 | 1 |
| MSTRG. 22893. 1  | 96   | 0. 44672 | 9. 696838379 | 1 |
| MSTRG. 22895. 2  | 180  | 0. 44574 | 9. 600891113 | 1 |
| MSTRG. 22896. 1  | 696  | 0. 37818 | 7. 649963379 | 1 |
| MSTRG. 22896. 4  | 698  | 0. 4664  | 7. 236022949 | 1 |
| MSTRG. 22898. 2  | 445  | 0. 46546 | 5. 197814941 | 1 |

|                 |      |          |              |    |
|-----------------|------|----------|--------------|----|
| MSTRG. 22899. 1 | 106  | 0. 40844 | 12. 17755127 | 1  |
| MSTRG. 22909. 2 | 242  | 0. 37229 | 5. 938903809 | 1  |
| MSTRG. 22911. 3 | 471  | 0. 46574 | 9. 213928223 | 1  |
| MSTRG. 22912. 1 | 121  | 0. 34043 | 9. 676940918 | 1  |
| MSTRG. 22913. 2 | 568  | 0. 43894 | 5. 396789551 | 1  |
| MSTRG. 22914. 3 | 136  | 0. 45849 | 6. 309509277 | 1  |
| MSTRG. 22919. 1 | 1196 | 0. 46186 | 5. 78326416  | 1  |
| MSTRG. 22921. 1 | 66   | 0. 3927  | 10. 25604248 | 1  |
| MSTRG. 22922. 1 | 632  | 0. 37458 | 7. 101135254 | 1  |
| MSTRG. 22922. 3 | 642  | 0. 39439 | 6. 760314941 | 1  |
| MSTRG. 22924. 1 | 368  | 0. 37839 | 8. 901550293 | 1  |
| MSTRG. 22922. 6 | 69   | 0. 412   | 4. 950012207 | 1  |
| MSTRG. 22924. 3 | 160  | 0. 29328 | 9. 338562012 | 1  |
| MSTRG. 22924. 2 | 368  | 0. 42173 | 8. 901550293 | 1  |
| MSTRG. 22928. 2 | 1326 | 0. 46862 | 5. 960754395 | 1  |
| MSTRG. 22931. 5 | 727  | 0. 413   | 6. 508728027 | 1  |
| MSTRG. 22931. 6 | 725  | 0. 45076 | 6. 508728027 | 1  |
| MSTRG. 22933. 1 | 455  | 0. 43287 | 5. 684143066 | 1  |
| MSTRG. 22935. 1 | 306  | 0. 43486 | 10. 21990967 | 1  |
| MSTRG. 22936. 1 | 319  | 0. 42056 | 5. 290100098 | 1  |
| MSTRG. 22937. 2 | 385  | 0. 40876 | 5. 938049316 | 1  |
| MSTRG. 22937. 3 | 385  | 0. 41496 | 5. 938049316 | 1  |
| MSTRG. 22941. 4 | 514  | 0. 46383 | 5. 196716309 | -1 |
| MSTRG. 22943. 1 | 303  | 0. 45333 | 9. 050354004 | 1  |
| MSTRG. 22944. 2 | 127  | 0. 33359 | 5. 09588623  | 1  |
| MSTRG. 22925. 3 | 1387 | 0. 46513 | 5. 602722168 | 1  |
| MSTRG. 22946. 1 | 129  | 0. 42862 | 9. 096008301 | 1  |
| MSTRG. 22946. 4 | 89   | 0. 44042 | 4. 376403809 | 1  |
| MSTRG. 22947. 2 | 250  | 0. 38838 | 5. 964782715 | 1  |
| MSTRG. 22948. 3 | 1034 | 0. 43502 | 6. 560241699 | 1  |
| MSTRG. 22948. 4 | 1080 | 0. 4586  | 6. 237365723 | 1  |
| MSTRG. 22948. 2 | 1055 | 0. 42901 | 6. 529968262 | 1  |
| MSTRG. 22948. 5 | 1034 | 0. 44082 | 6. 560241699 | 1  |
| MSTRG. 22951. 1 | 493  | 0. 43006 | 6. 739440918 | 1  |
| MSTRG. 22951. 2 | 493  | 0. 4567  | 6. 739440918 | 1  |
| MSTRG. 22953. 1 | 594  | 0. 4144  | 6. 370910645 | 1  |
| MSTRG. 22953. 2 | 587  | 0. 37772 | 6. 282043457 | 1  |
| MSTRG. 22953. 8 | 128  | 0. 31852 | 8. 666931152 | 1  |
| MSTRG. 22953. 4 | 594  | 0. 42227 | 6. 370910645 | 1  |
| MSTRG. 22953. 5 | 594  | 0. 40045 | 6. 370910645 | 1  |
| MSTRG. 22953. 6 | 587  | 0. 42723 | 6. 282043457 | 1  |
| MSTRG. 22953. 7 | 587  | 0. 38419 | 6. 282043457 | 1  |
| MSTRG. 22953. 3 | 1073 | 0. 4602  | 5. 895935059 | 1  |
| MSTRG. 22954. 1 | 59   | 0. 30733 | 8. 84197998  | 1  |
| MSTRG. 22955. 1 | 55   | 0. 41361 | 11. 00860596 | -1 |
| MSTRG. 22965. 3 | 113  | 0. 38657 | 5. 300964355 | 1  |
| MSTRG. 22965. 5 | 272  | 0. 46888 | 9. 210754395 | -1 |
| MSTRG. 22965. 4 | 631  | 0. 49495 | 4. 454040527 | 1  |
| MSTRG. 22965. 6 | 879  | 0. 48539 | 4. 722717285 | 1  |
| MSTRG. 22965. 8 | 380  | 0. 41889 | 9. 12677002  | 1  |
| MSTRG. 22976. 4 | 512  | 0. 4655  | 12. 39862061 | 1  |
| MSTRG. 22977. 2 | 686  | 0. 44573 | 9. 259094238 | 1  |
| MSTRG. 22979. 2 | 297  | 0. 32421 | 9. 894470215 | 1  |
| MSTRG. 22979. 3 | 403  | 0. 32421 | 8. 55657959  | 1  |

|                  |      |          |              |    |
|------------------|------|----------|--------------|----|
| MSTRG. 22983. 2  | 426  | 0. 46444 | 4. 744934082 | 1  |
| MSTRG. 22984. 5  | 189  | 0. 43456 | 8. 594543457 | 1  |
| MSTRG. 22984. 1  | 217  | 0. 36153 | 8. 32635498  | 1  |
| MSTRG. 22984. 3  | 217  | 0. 37028 | 8. 32635498  | 1  |
| MSTRG. 22984. 4  | 153  | 0. 41649 | 9. 560974121 | 1  |
| MSTRG. 22985. 2  | 247  | 0. 37733 | 7. 155334473 | 1  |
| MSTRG. 22986. 3  | 425  | 0. 36665 | 9. 073059082 | 1  |
| MSTRG. 22986. 4  | 425  | 0. 41838 | 9. 073059082 | 1  |
| MSTRG. 22986. 5  | 469  | 0. 32919 | 9. 399475098 | 1  |
| MSTRG. 22966. 6  | 1150 | 0. 45261 | 4. 961853027 | 1  |
| MSTRG. 22966. 2  | 1150 | 0. 32878 | 4. 961853027 | 1  |
| MSTRG. 22966. 3  | 1150 | 0. 32878 | 4. 961853027 | 1  |
| MSTRG. 22966. 4  | 1150 | 0. 32878 | 4. 961853027 | 1  |
| MSTRG. 22966. 5  | 166  | 0. 27517 | 4. 192565918 | 1  |
| MSTRG. 22967. 1  | 48   | 0. 30203 | 8. 841125488 | 1  |
| MSTRG. 22968. 1  | 134  | 0. 28848 | 8. 289855957 | 1  |
| MSTRG. 22967. 2  | 154  | 0. 28723 | 11. 72576904 | 1  |
| MSTRG. 22966. 7  | 1150 | 0. 31596 | 4. 961853027 | 1  |
| MSTRG. 22966. 8  | 1149 | 0. 32878 | 4. 961853027 | 1  |
| MSTRG. 22966. 9  | 1149 | 0. 4431  | 4. 961853027 | 1  |
| MSTRG. 22966. 10 | 1096 | 0. 34463 | 4. 72076416  | 1  |
| MSTRG. 22972. 1  | 413  | 0. 45149 | 7. 211730957 | 1  |
| MSTRG. 23003. 1  | 46   | 0. 39973 | 4. 36895752  | -1 |
| MSTRG. 23003. 2  | 76   | 0. 44608 | 10. 84136963 | 1  |
| MSTRG. 23003. 3  | 85   | 0. 43183 | 10. 84136963 | 1  |
| MSTRG. 23015. 1  | 3704 | 0. 43637 | 5. 811828613 | 1  |
| MSTRG. 23015. 2  | 3704 | 0. 43637 | 5. 811828613 | 1  |
| MSTRG. 23016. 1  | 101  | 0. 32837 | 8. 856872559 | 1  |
| MSTRG. 23015. 3  | 3704 | 0. 44899 | 5. 811828613 | 1  |
| MSTRG. 23017. 1  | 105  | 0. 27678 | 9. 481384277 | 1  |
| MSTRG. 23018. 1  | 155  | 0. 28542 | 10. 61785889 | 1  |
| MSTRG. 23006. 1  | 42   | 0. 34902 | 6. 374694824 | 1  |
| MSTRG. 23007. 1  | 1035 | 0. 45824 | 6. 14239502  | 1  |
| MSTRG. 23007. 3  | 1020 | 0. 47317 | 6. 02923584  | 1  |
| MSTRG. 23009. 1  | 52   | 0. 31587 | 9. 899719238 | 1  |
| MSTRG. 23009. 2  | 149  | 0. 32575 | 6. 268371582 | 1  |
| MSTRG. 23009. 3  | 106  | 0. 3143  | 11. 89666748 | 1  |
| MSTRG. 23049. 1  | 126  | 0. 43209 | 9. 29901123  | -1 |
| MSTRG. 23050. 1  | 33   | 0. 36201 | 9. 186706543 | 1  |
| MSTRG. 23048. 5  | 296  | 0. 4464  | 4. 635681152 | 1  |
| MSTRG. 23048. 4  | 296  | 0. 45144 | 4. 635681152 | 1  |
| MSTRG. 23048. 6  | 282  | 0. 43386 | 4. 716125488 | 1  |
| MSTRG. 23052. 2  | 578  | 0. 40088 | 6. 383605957 | 1  |
| MSTRG. 23055. 1  | 822  | 0. 45006 | 6. 356018066 | 1  |
| MSTRG. 23055. 5  | 822  | 0. 4362  | 6. 356018066 | 1  |
| MSTRG. 23054. 3  | 533  | 0. 43207 | 4. 795349121 | 1  |
| MSTRG. 23057. 1  | 175  | 0. 29059 | 10. 18450928 | 1  |
| MSTRG. 23058. 1  | 73   | 0. 31885 | 6. 88067627  | 1  |
| MSTRG. 23061. 1  | 453  | 0. 28923 | 8. 821594238 | 1  |
| MSTRG. 23061. 2  | 39   | 0. 32983 | 10. 91619873 | 1  |
| MSTRG. 23071. 1  | 439  | 0. 38235 | 5. 979187012 | 1  |
| MSTRG. 23080. 2  | 112  | 0. 27274 | 10. 64263916 | 1  |
| MSTRG. 23080. 1  | 112  | 0. 36273 | 10. 64263916 | 1  |
| MSTRG. 23082. 1  | 2629 | 0. 44644 | 6. 619689941 | 1  |



|                 |      |          |              |    |
|-----------------|------|----------|--------------|----|
| MSTRG. 23082. 2 | 329  | 0. 38587 | 5. 737243652 | 1  |
| MSTRG. 23082. 3 | 2629 | 0. 44644 | 6. 619689941 | 1  |
| MSTRG. 23082. 4 | 2629 | 0. 44644 | 6. 619689941 | 1  |
| MSTRG. 23084. 1 | 43   | 0. 35645 | 7. 804504395 | -1 |
| MSTRG. 23072. 2 | 139  | 0. 32075 | 9. 907165527 | 1  |
| MSTRG. 23074. 1 | 456  | 0. 4736  | 5. 073669434 | 1  |
| MSTRG. 23074. 2 | 513  | 0. 48253 | 5. 136657715 | 1  |
| MSTRG. 23075. 1 | 78   | 0. 2725  | 9. 376281738 | 1  |
| MSTRG. 23076. 1 | 77   | 0. 30242 | 9. 299133301 | 1  |
| MSTRG. 23087. 3 | 1300 | 0. 36882 | 6. 922790527 | 1  |
| MSTRG. 23079. 2 | 1036 | 0. 48753 | 6. 81854248  | 1  |
| MSTRG. 23089. 2 | 36   | 0. 30935 | 10. 18743896 | 1  |
| MSTRG. 23089. 1 | 40   | 0. 27991 | 4. 957702637 | 1  |
| MSTRG. 23094. 2 | 298  | 0. 34162 | 8. 57220459  | 1  |
| MSTRG. 23094. 4 | 167  | 0. 29115 | 8. 256408691 | 1  |
| MSTRG. 23094. 5 | 174  | 0. 28334 | 7. 716125488 | 1  |
| MSTRG. 23094. 6 | 174  | 0. 28982 | 7. 716125488 | 1  |
| MSTRG. 23101. 1 | 1300 | 0. 42032 | 7. 287780762 | 1  |
| MSTRG. 23101. 2 | 1308 | 0. 42032 | 7. 420959473 | 1  |
| MSTRG. 23106. 3 | 691  | 0. 48037 | 5. 639831543 | 1  |
| MSTRG. 23106. 4 | 690  | 0. 49121 | 5. 639831543 | 1  |
| MSTRG. 23106. 5 | 690  | 0. 45752 | 5. 639831543 | 1  |
| MSTRG. 23108. 1 | 636  | 0. 46286 | 5. 716491699 | 1  |
| MSTRG. 23105. 2 | 149  | 0. 34079 | 9. 941955566 | 1  |
| MSTRG. 23110. 2 | 386  | 0. 43442 | 5. 461120605 | 1  |
| MSTRG. 23110. 3 | 497  | 0. 4432  | 5. 661071777 | 1  |
| MSTRG. 23122. 1 | 565  | 0. 47014 | 7. 346984863 | 1  |
| MSTRG. 23122. 2 | 493  | 0. 45361 | 6. 771911621 | 1  |
| MSTRG. 23122. 3 | 493  | 0. 46875 | 6. 771911621 | 1  |
| MSTRG. 23127. 1 | 75   | 0. 31099 | 11. 18463135 | 1  |
| MSTRG. 23127. 2 | 93   | 0. 27678 | 8. 797668457 | 1  |
| MSTRG. 23128. 1 | 63   | 0. 40909 | 9. 168151855 | 1  |
| MSTRG. 23130. 1 | 81   | 0. 3366  | 4. 239318848 | 1  |
| MSTRG. 23134. 1 | 289  | 0. 3462  | 8. 270935059 | 1  |
| MSTRG. 23139. 2 | 551  | 0. 38812 | 8. 849182129 | 1  |
| MSTRG. 23139. 4 | 110  | 0. 44464 | 3. 83001709  | 1  |
| MSTRG. 23139. 5 | 146  | 0. 44955 | 4. 135925293 | 1  |
| MSTRG. 23139. 6 | 110  | 0. 48895 | 3. 83001709  | 1  |
| MSTRG. 23139. 7 | 102  | 0. 36918 | 4. 33782959  | 1  |
| MSTRG. 23142. 2 | 131  | 0. 27327 | 9. 958312988 | 1  |
| MSTRG. 23142. 1 | 131  | 0. 27327 | 9. 958312988 | 1  |
| MSTRG. 23145. 1 | 128  | 0. 28927 | 9. 011047363 | 1  |
| MSTRG. 23145. 2 | 142  | 0. 28243 | 6. 877746582 | 1  |
| MSTRG. 23146. 1 | 155  | 0. 38473 | 4. 922790527 | -1 |
| MSTRG. 23153. 2 | 681  | 0. 4209  | 5. 960021973 | 1  |
| MSTRG. 23153. 3 | 673  | 0. 40425 | 6. 066711426 | 1  |
| MSTRG. 23150. 2 | 237  | 0. 42635 | 4. 910583496 | 1  |
| MSTRG. 23151. 1 | 68   | 0. 42024 | 8. 804016113 | 1  |
| MSTRG. 23154. 1 | 92   | 0. 3972  | 9. 585144043 | -1 |
| MSTRG. 23159. 3 | 240  | 0. 45382 | 5. 663757324 | 1  |
| MSTRG. 23160. 1 | 577  | 0. 38162 | 7. 111022949 | 1  |
| MSTRG. 23158. 1 | 37   | 0. 45932 | 7. 88104248  | 1  |
| MSTRG. 23158. 2 | 110  | 0. 44554 | 11. 94244385 | 1  |
| MSTRG. 23166. 1 | 85   | 0. 46526 | 5. 285949707 | 1  |

|                 |      |          |              |    |
|-----------------|------|----------|--------------|----|
| MSTRG. 23169. 1 | 129  | 0. 35008 | 9. 920837402 | 1  |
| MSTRG. 23173. 1 | 92   | 0. 41703 | 4. 895690918 | 1  |
| MSTRG. 23175. 1 | 101  | 0. 41631 | 10. 17987061 | 1  |
| MSTRG. 23175. 2 | 101  | 0. 39683 | 10. 17987061 | 1  |
| MSTRG. 23174. 1 | 73   | 0. 43383 | 8. 683532715 | 1  |
| MSTRG. 23178. 1 | 325  | 0. 35135 | 5. 261169434 | 1  |
| MSTRG. 23182. 1 | 307  | 0. 43165 | 6. 429992676 | 1  |
| MSTRG. 23187. 1 | 47   | 0. 33119 | 9. 300598145 | 1  |
| MSTRG. 23188. 1 | 245  | 0. 34938 | 9. 610046387 | 1  |
| MSTRG. 23188. 2 | 229  | 0. 28948 | 9. 727478027 | 1  |
| MSTRG. 23188. 4 | 229  | 0. 28948 | 9. 727478027 | 1  |
| MSTRG. 23188. 3 | 227  | 0. 31759 | 9. 152893066 | 1  |
| MSTRG. 23189. 2 | 2448 | 0. 36803 | 8. 550109863 | 1  |
| MSTRG. 23191. 3 | 150  | 0. 32916 | 7. 62701416  | 1  |
| MSTRG. 23191. 4 | 258  | 0. 35695 | 9. 06842041  | 1  |
| MSTRG. 23191. 2 | 232  | 0. 36811 | 8. 929992676 | 1  |
| MSTRG. 23192. 4 | 94   | 0. 38519 | 9. 659851074 | 1  |
| MSTRG. 23186. 2 | 655  | 0. 40889 | 6. 367370605 | 1  |
| MSTRG. 23194. 1 | 1261 | 0. 34876 | 9. 083068848 | 1  |
| MSTRG. 23194. 2 | 1262 | 0. 34876 | 9. 083068848 | 1  |
| MSTRG. 23195. 3 | 544  | 0. 41418 | 7. 108581543 | -1 |
| MSTRG. 23195. 4 | 596  | 0. 41623 | 7. 787658691 | -1 |
| MSTRG. 23195. 2 | 544  | 0. 38847 | 7. 108581543 | -1 |
| MSTRG. 23195. 1 | 596  | 0. 39432 | 7. 787658691 | -1 |
| MSTRG. 23196. 1 | 139  | 0. 34507 | 8. 25604248  | 1  |
| MSTRG. 23193. 1 | 645  | 0. 47598 | 5. 508972168 | 1  |
| MSTRG. 23197. 2 | 97   | 0. 39271 | 6. 818908691 | -1 |
| MSTRG. 23202. 1 | 256  | 0. 44586 | 6. 230529785 | 1  |
| MSTRG. 23204. 3 | 1500 | 0. 49686 | 5. 215393066 | 1  |
| MSTRG. 23201. 2 | 183  | 0. 37675 | 5. 233337402 | 1  |
| MSTRG. 23207. 1 | 263  | 0. 43484 | 5. 058654785 | 1  |
| MSTRG. 23207. 4 | 156  | 0. 39875 | 5. 018615723 | 1  |
| MSTRG. 23212. 1 | 82   | 0. 33411 | 5. 113952637 | 1  |
| MSTRG. 23213. 1 | 539  | 0. 39293 | 9. 170227051 | 1  |
| MSTRG. 23221. 3 | 420  | 0. 36797 | 7. 341369629 | 1  |
| MSTRG. 23221. 2 | 420  | 0. 29115 | 7. 341369629 | 1  |
| MSTRG. 23222. 1 | 54   | 0. 32439 | 4. 495178223 | 1  |
| MSTRG. 23223. 1 | 528  | 0. 34752 | 9. 27923584  | 1  |
| MSTRG. 23223. 2 | 425  | 0. 38488 | 9. 525695801 | 1  |
| MSTRG. 23223. 3 | 425  | 0. 3843  | 9. 525695801 | 1  |
| MSTRG. 23223. 4 | 425  | 0. 37563 | 9. 525695801 | 1  |
| MSTRG. 23224. 1 | 49   | 0. 31993 | 9. 034973145 | 1  |
| MSTRG. 23234. 1 | 94   | 0. 32911 | 7. 825866699 | 1  |
| MSTRG. 23237. 1 | 821  | 0. 31861 | 9. 331115723 | 1  |
| MSTRG. 23237. 3 | 812  | 0. 31696 | 9. 359436035 | 1  |
| MSTRG. 23239. 1 | 474  | 0. 42561 | 8. 310241699 | 1  |
| MSTRG. 23241. 1 | 124  | 0. 34695 | 9. 756530762 | 1  |
| MSTRG. 23253. 1 | 87   | 0. 45063 | 5. 43939209  | 1  |
| MSTRG. 23255. 2 | 1780 | 0. 43693 | 8. 660095215 | 1  |
| MSTRG. 23255. 4 | 1781 | 0. 4429  | 8. 660095215 | 1  |
| MSTRG. 23255. 5 | 1780 | 0. 45743 | 8. 660095215 | 1  |
| MSTRG. 23255. 6 | 1210 | 0. 46195 | 8. 879333496 | 1  |
| MSTRG. 23257. 1 | 56   | 0. 30388 | 11. 77276611 | 1  |
| MSTRG. 23255. 7 | 744  | 0. 3777  | 9. 444396973 | 1  |

|                  |      |          |              |    |
|------------------|------|----------|--------------|----|
| MSTRG. 23255. 8  | 547  | 0. 43183 | 9. 348083496 | 1  |
| MSTRG. 23265. 1  | 794  | 0. 44643 | 5. 488952637 | 1  |
| MSTRG. 23265. 2  | 968  | 0. 41075 | 5. 547790527 | -1 |
| MSTRG. 23265. 3  | 391  | 0. 42122 | 5. 678283691 | 1  |
| MSTRG. 23265. 12 | 794  | 0. 4348  | 5. 488952637 | 1  |
| MSTRG. 23265. 11 | 704  | 0. 42621 | 5. 525695801 | -1 |
| MSTRG. 23265. 13 | 1060 | 0. 41938 | 5. 51385498  | -1 |
| MSTRG. 23265. 7  | 1047 | 0. 41938 | 5. 520812988 | -1 |
| MSTRG. 23265. 15 | 90   | 0. 32831 | 9. 695007324 | 1  |
| MSTRG. 23262. 1  | 379  | 0. 29951 | 8. 077453613 | 1  |
| MSTRG. 23264. 1  | 383  | 0. 36555 | 6. 492126465 | 1  |
| MSTRG. 23258. 1  | 53   | 0. 41107 | 8. 829772949 | -1 |
| MSTRG. 23259. 1  | 75   | 0. 4563  | 4. 962219238 | 1  |
| MSTRG. 23268. 1  | 218  | 0. 44163 | 4. 807556152 | 1  |
| MSTRG. 23272. 1  | 158  | 0. 2884  | 11. 23956299 | 1  |
| MSTRG. 23272. 2  | 158  | 0. 32014 | 11. 23956299 | 1  |
| MSTRG. 23272. 3  | 158  | 0. 27067 | 11. 23956299 | 1  |
| MSTRG. 23272. 4  | 158  | 0. 27067 | 10. 04766846 | 1  |
| MSTRG. 23272. 5  | 110  | 0. 43037 | 9. 557922363 | 1  |
| MSTRG. 23271. 3  | 145  | 0. 4391  | 4. 364196777 | 1  |
| MSTRG. 23273. 3  | 311  | 0. 3672  | 8. 907775879 | 1  |
| MSTRG. 23275. 3  | 358  | 0. 4748  | 5. 872131348 | 1  |
| MSTRG. 23280. 2  | 376  | 0. 40439 | 9. 355529785 | 1  |
| MSTRG. 23284. 2  | 291  | 0. 39305 | 8. 993835449 | 1  |
| MSTRG. 23285. 3  | 350  | 0. 44803 | 9. 252502441 | 1  |
| MSTRG. 23285. 4  | 562  | 0. 42958 | 9. 773742676 | 1  |
| MSTRG. 23285. 5  | 593  | 0. 46826 | 9. 796325684 | 1  |
| MSTRG. 23285. 6  | 593  | 0. 45477 | 9. 796325684 | 1  |
| MSTRG. 23285. 8  | 537  | 0. 40196 | 9. 703796387 | 1  |
| MSTRG. 23279. 1  | 95   | 0. 38128 | 10. 35601807 | 1  |
| MSTRG. 23291. 2  | 109  | 0. 48638 | 5. 875549316 | 1  |
| MSTRG. 23291. 3  | 109  | 0. 46056 | 5. 875549316 | 1  |
| MSTRG. 23292. 3  | 395  | 0. 34057 | 9. 081970215 | 1  |
| MSTRG. 23292. 4  | 395  | 0. 34243 | 9. 081970215 | 1  |
| MSTRG. 23292. 5  | 695  | 0. 29024 | 6. 338195801 | 1  |
| MSTRG. 23292. 6  | 693  | 0. 43691 | 6. 434875488 | 1  |
| MSTRG. 23292. 8  | 695  | 0. 32983 | 6. 338195801 | 1  |
| MSTRG. 23292. 9  | 693  | 0. 34768 | 6. 434875488 | 1  |
| MSTRG. 23292. 10 | 693  | 0. 35072 | 6. 365783691 | 1  |
| MSTRG. 23297. 4  | 1066 | 0. 48242 | 4. 976135254 | 1  |
| MSTRG. 23297. 3  | 1034 | 0. 47219 | 5. 065368652 | 1  |
| MSTRG. 23295. 1  | 165  | 0. 33223 | 12. 15655518 | 1  |
| MSTRG. 23296. 2  | 267  | 0. 42912 | 11. 3192749  | 1  |
| MSTRG. 23296. 3  | 295  | 0. 43098 | 11. 73468018 | 1  |
| MSTRG. 23301. 1  | 120  | 0. 39726 | 5. 120422363 | 1  |
| MSTRG. 23307. 1  | 589  | 0. 3586  | 9. 24017334  | 1  |
| MSTRG. 23307. 2  | 550  | 0. 39937 | 9. 266906738 | 1  |
| MSTRG. 23307. 3  | 595  | 0. 39328 | 9. 213195801 | 1  |
| MSTRG. 23307. 7  | 604  | 0. 43105 | 9. 356262207 | 1  |
| MSTRG. 23318. 4  | 490  | 0. 43049 | 6. 192199707 | 1  |
| MSTRG. 23318. 6  | 490  | 0. 44062 | 6. 192199707 | 1  |
| MSTRG. 23318. 7  | 490  | 0. 42366 | 6. 192199707 | 1  |
| MSTRG. 23318. 8  | 490  | 0. 43444 | 6. 192199707 | 1  |
| MSTRG. 23318. 9  | 490  | 0. 43136 | 6. 192199707 | 1  |

|                  |      |          |              |    |
|------------------|------|----------|--------------|----|
| MSTRG. 23321. 3  | 120  | 0. 44677 | 6. 782897949 | 1  |
| MSTRG. 23321. 2  | 120  | 0. 46242 | 6. 782897949 | 1  |
| MSTRG. 23322. 1  | 94   | 0. 33418 | 10. 61663818 | 1  |
| MSTRG. 23322. 4  | 75   | 0. 33799 | 10. 78057861 | 1  |
| MSTRG. 23322. 5  | 75   | 0. 36441 | 10. 78057861 | 1  |
| MSTRG. 23322. 3  | 75   | 0. 36828 | 10. 78057861 | 1  |
| MSTRG. 23323. 3  | 541  | 0. 44189 | 6. 870788574 | 1  |
| MSTRG. 23314. 1  | 1103 | 0. 35151 | 5. 397399902 | 1  |
| MSTRG. 23324. 2  | 554  | 0. 40453 | 9. 110656738 | 1  |
| MSTRG. 23325. 1  | 367  | 0. 45717 | 5. 494812012 | 1  |
| MSTRG. 23332. 2  | 282  | 0. 35597 | 9. 831604004 | 1  |
| MSTRG. 23333. 1  | 235  | 0. 40383 | 6. 838562012 | 1  |
| MSTRG. 23333. 3  | 76   | 0. 36575 | 7. 747253418 | 1  |
| MSTRG. 23327. 1  | 108  | 0. 29395 | 9. 504699707 | 1  |
| MSTRG. 23327. 2  | 108  | 0. 32442 | 9. 504699707 | 1  |
| MSTRG. 23327. 3  | 108  | 0. 30725 | 9. 504699707 | 1  |
| MSTRG. 23327. 4  | 156  | 0. 34956 | 9. 466491699 | 1  |
| MSTRG. 23339. 3  | 605  | 0. 43054 | 5. 607849121 | 1  |
| MSTRG. 23347. 2  | 2744 | 0. 34942 | 6. 370056152 | 1  |
| MSTRG. 23347. 3  | 2789 | 0. 36328 | 6. 424499512 | 1  |
| MSTRG. 23348. 2  | 363  | 0. 42057 | 10. 54229736 | 1  |
| MSTRG. 23348. 1  | 363  | 0. 32656 | 10. 54229736 | 1  |
| MSTRG. 23349. 1  | 232  | 0. 46024 | 6. 450378418 | 1  |
| MSTRG. 23349. 2  | 232  | 0. 43842 | 6. 450378418 | 1  |
| MSTRG. 23349. 3  | 232  | 0. 44311 | 6. 450378418 | 1  |
| MSTRG. 23349. 4  | 232  | 0. 43391 | 6. 450378418 | 1  |
| MSTRG. 23349. 5  | 232  | 0. 41899 | 6. 450378418 | 1  |
| MSTRG. 23350. 1  | 1602 | 0. 41933 | 8. 802062988 | 1  |
| MSTRG. 23350. 4  | 2508 | 0. 43473 | 8. 291320801 | 1  |
| MSTRG. 23355. 2  | 477  | 0. 36134 | 7. 153747559 | 1  |
| MSTRG. 23357. 1  | 359  | 0. 35843 | 8. 816711426 | 1  |
| MSTRG. 23360. 1  | 130  | 0. 3467  | 9. 077941895 | 1  |
| MSTRG. 23360. 2  | 130  | 0. 34884 | 9. 077941895 | 1  |
| MSTRG. 23360. 3  | 130  | 0. 33965 | 9. 077941895 | 1  |
| MSTRG. 23361. 1  | 145  | 0. 44961 | 5. 096862793 | -1 |
| MSTRG. 23352. 3  | 896  | 0. 41314 | 8. 330993652 | 1  |
| MSTRG. 23352. 4  | 896  | 0. 39775 | 8. 330993652 | 1  |
| MSTRG. 23352. 5  | 896  | 0. 40285 | 8. 330993652 | 1  |
| MSTRG. 23365. 2  | 145  | 0. 41884 | 10. 31072998 | 1  |
| MSTRG. 23369. 1  | 246  | 0. 36983 | 9. 040222168 | 1  |
| MSTRG. 23369. 9  | 246  | 0. 33568 | 9. 040222168 | 1  |
| MSTRG. 23369. 10 | 246  | 0. 33954 | 9. 040222168 | 1  |
| MSTRG. 23367. 1  | 38   | 0. 39999 | 4. 51739502  | 1  |
| MSTRG. 23367. 3  | 271  | 0. 4284  | 8. 755187988 | 1  |
| MSTRG. 23370. 3  | 253  | 0. 42192 | 6. 082580566 | 1  |
| MSTRG. 23373. 2  | 245  | 0. 35908 | 9. 643371582 | 1  |
| MSTRG. 23374. 3  | 629  | 0. 45359 | 6. 207458496 | 1  |
| MSTRG. 23377. 2  | 185  | 0. 34804 | 9. 363342285 | 1  |
| MSTRG. 23377. 3  | 170  | 0. 36422 | 8. 967102051 | 1  |
| MSTRG. 23379. 1  | 95   | 0. 2827  | 5. 886901855 | 1  |
| MSTRG. 23380. 1  | 609  | 0. 48618 | 11. 87591553 | 1  |
| MSTRG. 23379. 3  | 194  | 0. 40441 | 4. 110900879 | 1  |
| MSTRG. 23380. 2  | 657  | 0. 45102 | 11. 86517334 | 1  |
| MSTRG. 23380. 3  | 717  | 0. 4567  | 11. 88348389 | 1  |

|                 |      |          |              |    |
|-----------------|------|----------|--------------|----|
| MSTRG. 23380. 4 | 681  | 0. 4567  | 11. 8793335  | 1  |
| MSTRG. 23379. 4 | 161  | 0. 43021 | 4. 065246582 | -1 |
| MSTRG. 23380. 5 | 633  | 0. 48356 | 11. 90057373 | 1  |
| MSTRG. 23380. 6 | 621  | 0. 46666 | 11. 91571045 | 1  |
| MSTRG. 23380. 7 | 693  | 0. 47559 | 11. 88360596 | 1  |
| MSTRG. 23380. 8 | 669  | 0. 47294 | 11. 86785889 | 1  |
| MSTRG. 23382. 4 | 465  | 0. 43368 | 5. 313659668 | 1  |
| MSTRG. 23384. 2 | 480  | 0. 43369 | 6. 207214355 | 1  |
| MSTRG. 23387. 2 | 497  | 0. 37488 | 9. 331970215 | 1  |
| MSTRG. 23388. 2 | 103  | 0. 44007 | 5. 093688965 | 1  |
| MSTRG. 23391. 1 | 678  | 0. 37144 | 8. 807678223 | 1  |
| MSTRG. 23391. 2 | 70   | 0. 47771 | 9. 463928223 | -1 |
| MSTRG. 23391. 4 | 768  | 0. 35239 | 8. 756164551 | 1  |
| MSTRG. 23392. 1 | 833  | 0. 35723 | 8. 908630371 | 1  |
| MSTRG. 23396. 1 | 58   | 0. 31603 | 9. 487609863 | 1  |
| MSTRG. 23397. 2 | 617  | 0. 44905 | 5. 613830566 | 1  |
| MSTRG. 23401. 5 | 375  | 0. 41262 | 8. 957336426 | 1  |
| MSTRG. 23399. 3 | 316  | 0. 42078 | 5. 674133301 | 1  |
| MSTRG. 23407. 2 | 442  | 0. 44356 | 5. 490539551 | 1  |
| MSTRG. 23412. 4 | 141  | 0. 2707  | 11. 56695557 | 1  |
| MSTRG. 23412. 2 | 388  | 0. 39025 | 6. 194519043 | 1  |
| MSTRG. 23412. 3 | 388  | 0. 39765 | 6. 194519043 | 1  |
| MSTRG. 23413. 1 | 97   | 0. 27313 | 10. 29095459 | 1  |
| MSTRG. 23406. 1 | 200  | 0. 32854 | 4. 97064209  | 1  |
| MSTRG. 23414. 1 | 249  | 0. 42236 | 8. 768981934 | 1  |
| MSTRG. 23415. 1 | 556  | 0. 45925 | 9. 372009277 | 1  |
| MSTRG. 23415. 2 | 100  | 0. 46636 | 11. 43634033 | 1  |
| MSTRG. 23415. 3 | 107  | 0. 30249 | 10. 92694092 | 1  |
| MSTRG. 23415. 5 | 142  | 0. 37694 | 9. 290344238 | 1  |
| MSTRG. 23415. 4 | 563  | 0. 45672 | 9. 171081543 | 1  |
| MSTRG. 23416. 1 | 752  | 0. 39834 | 9. 698913574 | 1  |
| MSTRG. 23416. 2 | 752  | 0. 40158 | 9. 698913574 | 1  |
| MSTRG. 23420. 1 | 442  | 0. 35635 | 5. 013000488 | 1  |
| MSTRG. 23430. 2 | 421  | 0. 41315 | 8. 684387207 | 1  |
| MSTRG. 23433. 1 | 560  | 0. 37938 | 8. 753845215 | 1  |
| MSTRG. 23433. 2 | 371  | 0. 42568 | 5. 409118652 | 1  |
| MSTRG. 23435. 1 | 120  | 0. 35559 | 10. 85980225 | 1  |
| MSTRG. 23443. 5 | 519  | 0. 44739 | 8. 696594238 | 1  |
| MSTRG. 23443. 6 | 661  | 0. 46121 | 8. 495666504 | 1  |
| MSTRG. 23443. 7 | 455  | 0. 44414 | 8. 972351074 | 1  |
| MSTRG. 23438. 3 | 149  | 0. 46814 | 5. 264343262 | -1 |
| MSTRG. 23451. 2 | 502  | 0. 41158 | 9. 820251465 | 1  |
| MSTRG. 23451. 3 | 502  | 0. 43208 | 9. 820251465 | 1  |
| MSTRG. 23454. 2 | 133  | 0. 38134 | 4. 122131348 | 1  |
| MSTRG. 23455. 1 | 68   | 0. 39214 | 9. 44317627  | 1  |
| MSTRG. 23456. 1 | 878  | 0. 46483 | 6. 450622559 | 1  |
| MSTRG. 23461. 2 | 352  | 0. 36325 | 6. 027893066 | 1  |
| MSTRG. 23462. 1 | 539  | 0. 44148 | 5. 546936035 | 1  |
| MSTRG. 23457. 2 | 122  | 0. 41893 | 4. 927429199 | 1  |
| MSTRG. 23463. 2 | 129  | 0. 4094  | 4. 390441895 | 1  |
| MSTRG. 23467. 2 | 1180 | 0. 36518 | 6. 135314941 | 1  |
| MSTRG. 23467. 3 | 1243 | 0. 394   | 5. 969421387 | 1  |
| MSTRG. 23467. 5 | 1254 | 0. 40779 | 5. 902893066 | 1  |
| MSTRG. 23467. 4 | 1303 | 0. 39033 | 5. 815490723 | 1  |

|                  |      |          |              |   |
|------------------|------|----------|--------------|---|
| MSTRG. 23466. 3  | 126  | 0. 42095 | 11. 64813232 | 1 |
| MSTRG. 23470. 1  | 571  | 0. 35788 | 5. 036437988 | 1 |
| MSTRG. 23470. 2  | 583  | 0. 39583 | 5. 10760498  | 1 |
| MSTRG. 23474. 2  | 324  | 0. 43264 | 8. 826843262 | 1 |
| MSTRG. 23479. 8  | 930  | 0. 40959 | 9. 084777832 | 1 |
| MSTRG. 23479. 5  | 867  | 0. 35212 | 9. 262756348 | 1 |
| MSTRG. 23479. 7  | 907  | 0. 35298 | 9. 217956543 | 1 |
| MSTRG. 23479. 9  | 809  | 0. 40794 | 9. 446716309 | 1 |
| MSTRG. 23479. 3  | 900  | 0. 38209 | 9. 217956543 | 1 |
| MSTRG. 23479. 10 | 890  | 0. 40959 | 9. 121643066 | 1 |
| MSTRG. 23479. 11 | 890  | 0. 40959 | 9. 121643066 | 1 |
| MSTRG. 23482. 3  | 957  | 0. 47888 | 5. 820617676 | 1 |
| MSTRG. 23482. 4  | 916  | 0. 45001 | 5. 866638184 | 1 |
| MSTRG. 23484. 1  | 163  | 0. 39511 | 7. 571716309 | 1 |
| MSTRG. 23485. 2  | 457  | 0. 48025 | 9. 107971191 | 1 |
| MSTRG. 23486. 1  | 234  | 0. 37106 | 7. 756286621 | 1 |
| MSTRG. 23488. 2  | 181  | 0. 43412 | 11. 65374756 | 1 |
| MSTRG. 23488. 4  | 193  | 0. 37209 | 8. 872253418 | 1 |
| MSTRG. 23491. 2  | 131  | 0. 45186 | 4. 446105957 | 1 |
| MSTRG. 23492. 2  | 400  | 0. 41938 | 5. 432434082 | 1 |
| MSTRG. 23492. 5  | 239  | 0. 34451 | 4. 938781738 | 1 |
| MSTRG. 23495. 1  | 110  | 0. 38777 | 4. 852478027 | 1 |
| MSTRG. 23505. 2  | 615  | 0. 46278 | 5. 295227051 | 1 |
| MSTRG. 23510. 2  | 594  | 0. 36612 | 10. 09564209 | 1 |
| MSTRG. 23515. 4  | 629  | 0. 45542 | 4. 393127441 | 1 |
| MSTRG. 23520. 1  | 262  | 0. 36505 | 8. 925476074 | 1 |
| MSTRG. 23520. 2  | 175  | 0. 49409 | 5. 885437012 | 1 |
| MSTRG. 23520. 3  | 175  | 0. 42743 | 5. 885437012 | 1 |
| MSTRG. 23520. 4  | 245  | 0. 43963 | 7. 145324707 | 1 |
| MSTRG. 23513. 1  | 338  | 0. 36116 | 9. 757507324 | 1 |
| MSTRG. 23522. 5  | 204  | 0. 35272 | 11. 75872803 | 1 |
| MSTRG. 23522. 3  | 213  | 0. 33594 | 11. 72894287 | 1 |
| MSTRG. 23522. 4  | 204  | 0. 33594 | 11. 75872803 | 1 |
| MSTRG. 23525. 2  | 1185 | 0. 4627  | 5. 578552246 | 1 |
| MSTRG. 23528. 2  | 1022 | 0. 37786 | 8. 000793457 | 1 |
| MSTRG. 23529. 9  | 651  | 0. 46811 | 5. 873474121 | 1 |
| MSTRG. 23530. 1  | 439  | 0. 45467 | 5. 912902832 | 1 |
| MSTRG. 23531. 2  | 368  | 0. 38687 | 5. 06451416  | 1 |
| MSTRG. 23531. 1  | 303  | 0. 40204 | 7. 48248291  | 1 |
| MSTRG. 23530. 3  | 451  | 0. 45466 | 6. 057067871 | 1 |
| MSTRG. 23532. 1  | 30   | 0. 45674 | 10. 637146   | 1 |
| MSTRG. 23535. 3  | 485  | 0. 46959 | 4. 524597168 | 1 |
| MSTRG. 23535. 2  | 485  | 0. 47579 | 4. 524597168 | 1 |
| MSTRG. 23535. 4  | 526  | 0. 45114 | 4. 45526123  | 1 |
| MSTRG. 23535. 6  | 438  | 0. 43027 | 4. 599304199 | 1 |
| MSTRG. 23534. 2  | 104  | 0. 37775 | 6. 50982666  | 1 |
| MSTRG. 23545. 2  | 1957 | 0. 37766 | 8. 176330566 | 1 |
| MSTRG. 23550. 1  | 896  | 0. 43421 | 10. 34942627 | 1 |
| MSTRG. 23550. 3  | 896  | 0. 35337 | 10. 34942627 | 1 |
| MSTRG. 23550. 4  | 896  | 0. 41371 | 10. 34942627 | 1 |
| MSTRG. 23551. 4  | 421  | 0. 42277 | 4. 992858887 | 1 |
| MSTRG. 23552. 4  | 159  | 0. 44461 | 4. 967468262 | 1 |
| MSTRG. 23552. 5  | 151  | 0. 28426 | 5. 358581543 | 1 |
| MSTRG. 23552. 2  | 151  | 0. 33128 | 5. 358581543 | 1 |

|                  |     |          |              |    |
|------------------|-----|----------|--------------|----|
| MSTRG. 23552. 3  | 151 | 0. 28122 | 5. 358581543 | 1  |
| MSTRG. 23553. 4  | 498 | 0. 41704 | 6. 38092041  | 1  |
| MSTRG. 23567. 3  | 956 | 0. 43995 | 7. 750793457 | 1  |
| MSTRG. 23568. 2  | 369 | 0. 46366 | 5. 631774902 | 1  |
| MSTRG. 23568. 3  | 119 | 0. 3332  | 9. 910095215 | 1  |
| MSTRG. 23572. 3  | 126 | 0. 40112 | 4. 452087402 | 1  |
| MSTRG. 23572. 4  | 126 | 0. 41321 | 4. 452087402 | 1  |
| MSTRG. 23574. 4  | 520 | 0. 45023 | 5. 286437988 | 1  |
| MSTRG. 23575. 2  | 281 | 0. 44727 | 4. 874938965 | 1  |
| MSTRG. 23559. 4  | 401 | 0. 46954 | 8. 359802246 | 1  |
| MSTRG. 23559. 5  | 454 | 0. 46178 | 8. 819519043 | 1  |
| MSTRG. 23560. 2  | 82  | 0. 37607 | 4. 460510254 | 1  |
| MSTRG. 23561. 1  | 808 | 0. 36125 | 9. 135314941 | 1  |
| MSTRG. 23561. 2  | 221 | 0. 40248 | 9. 391296387 | 1  |
| MSTRG. 23556. 1  | 147 | 0. 43069 | 9. 068786621 | 1  |
| MSTRG. 23558. 2  | 380 | 0. 44844 | 8. 878967285 | 1  |
| MSTRG. 23562. 1  | 69  | 0. 40894 | 10. 16668701 | 1  |
| MSTRG. 23577. 2  | 202 | 0. 30129 | 5. 81829834  | 1  |
| MSTRG. 23579. 1  | 548 | 0. 34172 | 8. 519470215 | 1  |
| MSTRG. 23580. 1  | 104 | 0. 3752  | 5. 709899902 | 1  |
| MSTRG. 23582. 1  | 196 | 0. 39065 | 9. 437316895 | 1  |
| MSTRG. 23583. 2  | 276 | 0. 46025 | 6. 926818848 | 1  |
| MSTRG. 23585. 4  | 122 | 0. 38368 | 10. 09259033 | 1  |
| MSTRG. 23586. 1  | 532 | 0. 38218 | 9. 313171387 | 1  |
| MSTRG. 23586. 2  | 193 | 0. 36714 | 5. 408996582 | 1  |
| MSTRG. 23586. 3  | 187 | 0. 32578 | 8. 775817871 | 1  |
| MSTRG. 23585. 6  | 129 | 0. 37236 | 8. 816711426 | 1  |
| MSTRG. 23585. 7  | 129 | 0. 36856 | 8. 816711426 | 1  |
| MSTRG. 23585. 8  | 224 | 0. 3956  | 9. 29864502  | 1  |
| MSTRG. 23585. 9  | 150 | 0. 37135 | 8. 691467285 | 1  |
| MSTRG. 23585. 10 | 184 | 0. 36338 | 9. 054382324 | 1  |
| MSTRG. 23585. 11 | 168 | 0. 36613 | 8. 949523926 | 1  |
| MSTRG. 23587. 1  | 207 | 0. 41161 | 4. 509216309 | 1  |
| MSTRG. 23587. 2  | 140 | 0. 34673 | 4. 604064941 | 1  |
| MSTRG. 23592. 1  | 245 | 0. 46874 | 8. 094421387 | -1 |
| MSTRG. 23593. 1  | 255 | 0. 32893 | 9. 460144043 | 1  |
| MSTRG. 23594. 1  | 211 | 0. 36813 | 8. 534240723 | 1  |
| MSTRG. 23594. 2  | 76  | 0. 3376  | 9. 997497559 | 1  |
| MSTRG. 23594. 3  | 294 | 0. 35516 | 8. 914978027 | 1  |
| MSTRG. 23594. 4  | 76  | 0. 32038 | 9. 997497559 | 1  |
| MSTRG. 23595. 1  | 200 | 0. 38019 | 10. 6050415  | 1  |
| MSTRG. 23595. 2  | 200 | 0. 42827 | 10. 6050415  | 1  |
| MSTRG. 23595. 3  | 200 | 0. 31029 | 10. 6050415  | 1  |
| MSTRG. 23595. 4  | 200 | 0. 38866 | 10. 6050415  | 1  |
| MSTRG. 23594. 5  | 95  | 0. 40629 | 6. 007873535 | 1  |
| MSTRG. 23597. 2  | 109 | 0. 38164 | 7. 578186035 | 1  |
| MSTRG. 23597. 3  | 210 | 0. 41599 | 9. 330749512 | 1  |
| MSTRG. 23598. 1  | 869 | 0. 36764 | 8. 691223145 | 1  |
| MSTRG. 23598. 2  | 869 | 0. 41344 | 8. 691223145 | 1  |
| MSTRG. 23598. 3  | 912 | 0. 39321 | 8. 797302246 | 1  |
| MSTRG. 23598. 4  | 218 | 0. 43404 | 5. 86505127  | 1  |
| MSTRG. 23603. 2  | 582 | 0. 37971 | 9. 360656738 | 1  |
| MSTRG. 23607. 2  | 42  | 0. 41129 | 9. 199523926 | 1  |
| MSTRG. 23608. 2  | 263 | 0. 28746 | 10. 82794189 | -1 |

|                  |      |          |              |    |
|------------------|------|----------|--------------|----|
| MSTRG. 23619. 1  | 256  | 0. 40058 | 6. 623596191 | 1  |
| MSTRG. 23621. 5  | 95   | 0. 42061 | 5. 381408691 | 1  |
| MSTRG. 23621. 4  | 635  | 0. 41839 | 9. 34942627  | 1  |
| MSTRG. 23621. 1  | 671  | 0. 33337 | 9. 27557373  | 1  |
| MSTRG. 23621. 6  | 615  | 0. 33337 | 9. 221496582 | 1  |
| MSTRG. 23621. 3  | 686  | 0. 32469 | 9. 215393066 | 1  |
| MSTRG. 23622. 1  | 109  | 0. 30082 | 10. 00872803 | 1  |
| MSTRG. 23621. 7  | 641  | 0. 39476 | 9. 187561035 | 1  |
| MSTRG. 23621. 9  | 588  | 0. 36289 | 9. 32989502  | 1  |
| MSTRG. 23621. 11 | 588  | 0. 35339 | 9. 32989502  | 1  |
| MSTRG. 23621. 17 | 114  | 0. 2849  | 9. 184020996 | 1  |
| MSTRG. 23621. 18 | 584  | 0. 3582  | 8. 903137207 | 1  |
| MSTRG. 23623. 1  | 32   | 0. 353   | 3. 902160645 | 1  |
| MSTRG. 23629. 1  | 99   | 0. 28887 | 8. 368469238 | 1  |
| MSTRG. 23630. 1  | 312  | 0. 28883 | 10. 05914307 | 1  |
| MSTRG. 23630. 2  | 312  | 0. 3422  | 10. 05914307 | 1  |
| MSTRG. 23630. 3  | 312  | 0. 38653 | 10. 05828857 | 1  |
| MSTRG. 23630. 4  | 316  | 0. 3238  | 9. 665222168 | 1  |
| MSTRG. 23631. 1  | 37   | 0. 38    | 4. 25201416  | 1  |
| MSTRG. 23616. 2  | 111  | 0. 34312 | 8. 987731934 | 1  |
| MSTRG. 23753. 1  | 105  | 0. 36711 | 9. 66583252  | 1  |
| MSTRG. 23754. 2  | 600  | 0. 41306 | 9. 194152832 | 1  |
| MSTRG. 23754. 1  | 544  | 0. 39511 | 9. 168640137 | 1  |
| MSTRG. 23754. 4  | 488  | 0. 39339 | 8. 979553223 | -1 |
| MSTRG. 23754. 3  | 544  | 0. 37381 | 9. 168640137 | 1  |
| MSTRG. 23754. 5  | 1019 | 0. 43393 | 9. 22076416  | 1  |
| MSTRG. 23754. 7  | 544  | 0. 41548 | 9. 165222168 | 1  |
| MSTRG. 23754. 13 | 460  | 0. 39491 | 8. 935974121 | 1  |
| MSTRG. 23754. 14 | 822  | 0. 41836 | 9. 192687988 | 1  |
| MSTRG. 23754. 16 | 795  | 0. 41653 | 9. 253479004 | 1  |
| MSTRG. 23758. 1  | 65   | 0. 27139 | 9. 99029541  | 1  |
| MSTRG. 23763. 1  | 92   | 0. 45308 | 8. 804382324 | 1  |
| MSTRG. 23769. 5  | 636  | 0. 37983 | 8. 676940918 | 1  |
| MSTRG. 23769. 6  | 159  | 0. 28982 | 9. 097229004 | 1  |
| MSTRG. 23769. 8  | 636  | 0. 3713  | 8. 676940918 | 1  |
| MSTRG. 23770. 2  | 575  | 0. 38226 | 8. 814880371 | 1  |
| MSTRG. 23770. 1  | 575  | 0. 36612 | 8. 814880371 | 1  |
| MSTRG. 23770. 3  | 575  | 0. 36137 | 8. 814880371 | 1  |
| MSTRG. 23770. 4  | 126  | 0. 29772 | 9. 182922363 | 1  |
| MSTRG. 23770. 5  | 575  | 0. 32145 | 8. 814880371 | 1  |
| MSTRG. 23770. 6  | 539  | 0. 38226 | 9. 012390137 | 1  |
| MSTRG. 23770. 7  | 575  | 0. 34934 | 8. 814880371 | 1  |
| MSTRG. 23770. 8  | 126  | 0. 35631 | 9. 182922363 | 1  |
| MSTRG. 23770. 10 | 575  | 0. 37975 | 8. 814880371 | 1  |
| MSTRG. 23770. 9  | 575  | 0. 36813 | 8. 814880371 | 1  |
| MSTRG. 23773. 2  | 880  | 0. 43136 | 9. 112121582 | 1  |
| MSTRG. 23769. 11 | 63   | 0. 35598 | 4. 534362793 | 1  |
| MSTRG. 23765. 13 | 32   | 0. 30587 | 6. 703796387 | -1 |
| MSTRG. 23765. 15 | 32   | 0. 30587 | 6. 703796387 | -1 |
| MSTRG. 23765. 10 | 34   | 0. 2991  | 6. 703796387 | -1 |
| MSTRG. 23765. 12 | 34   | 0. 2991  | 6. 703796387 | -1 |
| MSTRG. 23765. 9  | 34   | 0. 2991  | 6. 703796387 | -1 |
| MSTRG. 23765. 8  | 55   | 0. 29236 | 9. 394104004 | 1  |
| MSTRG. 23765. 11 | 55   | 0. 26027 | 9. 394104004 | 1  |



|                  |      |          |              |   |
|------------------|------|----------|--------------|---|
| MSTRG. 23765. 14 | 55   | 0. 24926 | 9. 394104004 | 1 |
| MSTRG. 23765. 4  | 55   | 0. 27263 | 9. 394104004 | 1 |
| MSTRG. 23765. 7  | 55   | 0. 28472 | 9. 394104004 | 1 |
| MSTRG. 23765. 5  | 55   | 0. 26027 | 9. 394104004 | 1 |
| MSTRG. 23765. 6  | 55   | 0. 28967 | 9. 394104004 | 1 |
| MSTRG. 23770. 13 | 126  | 0. 39072 | 9. 182922363 | 1 |
| MSTRG. 23774. 1  | 893  | 0. 47379 | 9. 353210449 | 1 |
| MSTRG. 23770. 14 | 93   | 0. 31922 | 6. 262878418 | 1 |
| MSTRG. 23775. 1  | 71   | 0. 30968 | 8. 932434082 | 1 |
| MSTRG. 23776. 1  | 72   | 0. 32559 | 10. 871521   | 1 |
| MSTRG. 23777. 1  | 1372 | 0. 47202 | 9. 570251465 | 1 |
| MSTRG. 23777. 2  | 1418 | 0. 46622 | 9. 513000488 | 1 |
| MSTRG. 23777. 3  | 1372 | 0. 47677 | 9. 570251465 | 1 |
| MSTRG. 23778. 1  | 64   | 0. 34212 | 8. 614807129 | 1 |
| MSTRG. 23778. 2  | 721  | 0. 38062 | 9. 561462402 | 1 |
| MSTRG. 23779. 1  | 824  | 0. 41659 | 9. 315734863 | 1 |
| MSTRG. 23779. 2  | 1040 | 0. 44421 | 9. 304260254 | 1 |
| MSTRG. 23779. 3  | 1012 | 0. 42166 | 9. 292297363 | 1 |
| MSTRG. 23783. 1  | 25   | 0. 28908 | 7. 934020996 | 1 |
| MSTRG. 23785. 1  | 125  | 0. 39261 | 8. 385681152 | 1 |
| MSTRG. 23786. 1  | 29   | 0. 28587 | 9. 688293457 | 1 |
| MSTRG. 23788. 2  | 973  | 0. 47061 | 9. 26739502  | 1 |
| MSTRG. 23788. 3  | 753  | 0. 45567 | 9. 201599121 | 1 |
| MSTRG. 23788. 4  | 585  | 0. 454   | 9. 052307129 | 1 |
| MSTRG. 23788. 5  | 887  | 0. 44719 | 9. 466125488 | 1 |
| MSTRG. 23788. 7  | 557  | 0. 454   | 8. 965148926 | 1 |
| MSTRG. 23788. 6  | 949  | 0. 47488 | 9. 346740723 | 1 |
| MSTRG. 23788. 8  | 196  | 0. 45161 | 9. 266540527 | 1 |
| MSTRG. 23788. 9  | 98   | 0. 47072 | 4. 554748535 | 1 |
| MSTRG. 23789. 1  | 198  | 0. 34255 | 9. 938903809 | 1 |
| MSTRG. 23790. 1  | 78   | 0. 38091 | 4. 289367676 | 1 |
| MSTRG. 23790. 2  | 66   | 0. 3173  | 9. 301330566 | 1 |
| MSTRG. 23789. 2  | 154  | 0. 31768 | 8. 724182129 | 1 |
| MSTRG. 23789. 3  | 139  | 0. 36807 | 11. 25762939 | 1 |
| MSTRG. 23791. 1  | 611  | 0. 33738 | 9. 023010254 | 1 |
| MSTRG. 23791. 3  | 531  | 0. 37593 | 9. 276062012 | 1 |
| MSTRG. 23791. 5  | 611  | 0. 31096 | 9. 023010254 | 1 |
| MSTRG. 23791. 6  | 582  | 0. 33098 | 9. 100036621 | 1 |
| MSTRG. 23791. 4  | 531  | 0. 30788 | 9. 276062012 | 1 |
| MSTRG. 23791. 7  | 610  | 0. 32305 | 9. 258728027 | 1 |
| MSTRG. 23791. 8  | 611  | 0. 36561 | 9. 023010254 | 1 |
| MSTRG. 23791. 9  | 611  | 0. 33994 | 9. 023010254 | 1 |
| MSTRG. 23791. 11 | 415  | 0. 32533 | 9. 427062988 | 1 |
| MSTRG. 23791. 10 | 611  | 0. 32533 | 9. 023010254 | 1 |
| MSTRG. 23632. 1  | 418  | 0. 29526 | 9. 285705566 | 1 |
| MSTRG. 23632. 3  | 602  | 0. 33126 | 9. 480529785 | 1 |
| MSTRG. 23632. 4  | 382  | 0. 39643 | 9. 527160645 | 1 |
| MSTRG. 23632. 5  | 382  | 0. 36976 | 9. 527160645 | 1 |
| MSTRG. 23632. 6  | 418  | 0. 39846 | 9. 285705566 | 1 |
| MSTRG. 23632. 7  | 566  | 0. 4371  | 9. 592834473 | 1 |
| MSTRG. 23632. 8  | 574  | 0. 43246 | 9. 49041748  | 1 |
| MSTRG. 23632. 9  | 549  | 0. 38858 | 9. 592956543 | 1 |
| MSTRG. 23632. 10 | 59   | 0. 2947  | 4. 861022949 | 1 |
| MSTRG. 23632. 11 | 418  | 0. 35773 | 9. 285705566 | 1 |

|                 |      |          |              |    |
|-----------------|------|----------|--------------|----|
| MSTRG. 23635. 2 | 541  | 0. 37738 | 8. 995666504 | 1  |
| MSTRG. 23635. 3 | 541  | 0. 35502 | 8. 995666504 | 1  |
| MSTRG. 23639. 1 | 396  | 0. 30289 | 9. 60369873  | 1  |
| MSTRG. 23651. 1 | 174  | 0. 41037 | 5. 702819824 | 1  |
| MSTRG. 23652. 1 | 57   | 0. 36606 | 5. 532409668 | 1  |
| MSTRG. 23653. 1 | 75   | 0. 3801  | 10. 13238525 | 1  |
| MSTRG. 23654. 1 | 169  | 0. 28683 | 6. 605407715 | 1  |
| MSTRG. 23659. 1 | 120  | 0. 29439 | 8. 682067871 | 1  |
| MSTRG. 23651. 2 | 47   | 0. 37761 | 5. 948425293 | 1  |
| MSTRG. 23660. 1 | 38   | 0. 37305 | 11. 43719482 | 1  |
| MSTRG. 23651. 3 | 36   | 0. 36089 | 9. 52142334  | 1  |
| MSTRG. 23651. 4 | 174  | 0. 29793 | 5. 702819824 | 1  |
| MSTRG. 23651. 5 | 63   | 0. 34314 | 4. 929260254 | 1  |
| MSTRG. 23663. 1 | 85   | 0. 34444 | 10. 62957764 | 1  |
| MSTRG. 23664. 1 | 58   | 0. 39278 | 9. 62286377  | 1  |
| MSTRG. 23651. 6 | 174  | 0. 34615 | 5. 702819824 | 1  |
| MSTRG. 23651. 7 | 174  | 0. 28419 | 5. 702819824 | 1  |
| MSTRG. 23651. 8 | 55   | 0. 33412 | 4. 862854004 | 1  |
| MSTRG. 23666. 1 | 65   | 0. 36601 | 9. 057312012 | 1  |
| MSTRG. 23667. 1 | 161  | 0. 40205 | 9. 669006348 | -1 |
| MSTRG. 23668. 1 | 54   | 0. 35035 | 9. 235900879 | 1  |
| MSTRG. 23670. 1 | 685  | 0. 42944 | 9. 731018066 | 1  |
| MSTRG. 23670. 2 | 685  | 0. 45185 | 9. 731018066 | 1  |
| MSTRG. 23670. 3 | 685  | 0. 43799 | 9. 731018066 | 1  |
| MSTRG. 23671. 1 | 75   | 0. 4681  | 5. 608703613 | -1 |
| MSTRG. 23644. 2 | 58   | 0. 35824 | 12. 17852783 | 1  |
| MSTRG. 23644. 1 | 58   | 0. 44535 | 12. 17852783 | 1  |
| MSTRG. 23644. 3 | 61   | 0. 29196 | 10. 0401001  | 1  |
| MSTRG. 23644. 4 | 58   | 0. 36405 | 12. 17852783 | 1  |
| MSTRG. 23677. 1 | 563  | 0. 45589 | 4. 77947998  | 1  |
| MSTRG. 23677. 2 | 538  | 0. 38565 | 4. 840881348 | 1  |
| MSTRG. 23678. 6 | 371  | 0. 42691 | 5. 003234863 | 1  |
| MSTRG. 23681. 4 | 223  | 0. 39186 | 9. 80657959  | 1  |
| MSTRG. 23681. 5 | 269  | 0. 42684 | 9. 667297363 | 1  |
| MSTRG. 23681. 6 | 278  | 0. 43262 | 9. 528381348 | 1  |
| MSTRG. 23683. 1 | 221  | 0. 27217 | 9. 317687988 | 1  |
| MSTRG. 23683. 2 | 148  | 0. 31511 | 10. 53387451 | 1  |
| MSTRG. 23683. 3 | 157  | 0. 31008 | 8. 11151123  | 1  |
| MSTRG. 23690. 1 | 137  | 0. 36701 | 10. 51983643 | 1  |
| MSTRG. 23694. 7 | 638  | 0. 42217 | 8. 503845215 | 1  |
| MSTRG. 23694. 5 | 1019 | 0. 41296 | 8. 812927246 | 1  |
| MSTRG. 23694. 6 | 638  | 0. 41758 | 8. 503845215 | 1  |
| MSTRG. 23694. 4 | 1030 | 0. 39451 | 8. 776062012 | 1  |
| MSTRG. 23696. 1 | 641  | 0. 34791 | 10. 03851318 | 1  |
| MSTRG. 23696. 3 | 620  | 0. 34791 | 10. 01068115 | 1  |
| MSTRG. 23687. 1 | 202  | 0. 42759 | 8. 857727051 | -1 |
| MSTRG. 23688. 1 | 149  | 0. 28373 | 8. 081359863 | -1 |
| MSTRG. 23698. 3 | 785  | 0. 46081 | 9. 50579834  | 1  |
| MSTRG. 23701. 3 | 342  | 0. 3688  | 9. 65057373  | 1  |
| MSTRG. 23706. 1 | 863  | 0. 41599 | 4. 593200684 | 1  |
| MSTRG. 23706. 3 | 863  | 0. 44086 | 4. 593200684 | 1  |
| MSTRG. 23706. 2 | 807  | 0. 41599 | 4. 581359863 | 1  |
| MSTRG. 23699. 1 | 126  | 0. 35584 | 10. 20391846 | 1  |
| MSTRG. 23709. 3 | 677  | 0. 46301 | 6. 262512207 | 1  |

|                 |     |          |              |    |
|-----------------|-----|----------|--------------|----|
| MSTRG. 23709. 4 | 373 | 0. 39219 | 6. 13873291  | 1  |
| MSTRG. 23709. 5 | 301 | 0. 38205 | 10. 22564697 | 1  |
| MSTRG. 23709. 6 | 296 | 0. 431   | 10. 32501221 | 1  |
| MSTRG. 23709. 7 | 212 | 0. 44696 | 9. 869567871 | 1  |
| MSTRG. 23712. 1 | 66  | 0. 29143 | 11. 21478271 | 1  |
| MSTRG. 23711. 2 | 69  | 0. 36022 | 6. 708068848 | -1 |
| MSTRG. 23716. 1 | 764 | 0. 42999 | 5. 241149902 | 1  |
| MSTRG. 23716. 2 | 763 | 0. 42999 | 5. 241149902 | 1  |
| MSTRG. 23716. 6 | 546 | 0. 36085 | 5. 674865723 | 1  |
| MSTRG. 23716. 7 | 564 | 0. 33338 | 5. 758239746 | 1  |
| MSTRG. 23717. 2 | 44  | 0. 36183 | 7. 784240723 | 1  |
| MSTRG. 23717. 3 | 23  | 0. 41266 | 11. 8291626  | 1  |
| MSTRG. 23718. 2 | 403 | 0. 38907 | 5. 942321777 | 1  |
| MSTRG. 23720. 4 | 819 | 0. 33558 | 9. 485168457 | 1  |
| MSTRG. 23720. 5 | 820 | 0. 3667  | 9. 485168457 | 1  |
| MSTRG. 23727. 3 | 289 | 0. 35005 | 9. 134338379 | 1  |
| MSTRG. 23728. 1 | 17  | 0. 40297 | 4. 529602051 | 1  |
| MSTRG. 23728. 2 | 46  | 0. 44544 | 9. 983825684 | 1  |
| MSTRG. 23731. 2 | 744 | 0. 43779 | 5. 825378418 | 1  |
| MSTRG. 23732. 2 | 499 | 0. 45331 | 5. 632751465 | 1  |
| MSTRG. 23732. 3 | 469 | 0. 45826 | 5. 339172363 | 1  |
| MSTRG. 23736. 1 | 232 | 0. 44836 | 7. 897644043 | 1  |
| MSTRG. 23743. 2 | 315 | 0. 38785 | 9. 207214355 | 1  |
| MSTRG. 23744. 2 | 461 | 0. 3652  | 8. 089172363 | 1  |
| MSTRG. 23744. 3 | 381 | 0. 39913 | 8. 310119629 | 1  |
| MSTRG. 23797. 2 | 610 | 0. 30176 | 9. 77911377  | 1  |
| MSTRG. 23801. 4 | 517 | 0. 42578 | 8. 303894043 | 1  |
| MSTRG. 23801. 3 | 138 | 0. 47315 | 9. 398376465 | -1 |
| MSTRG. 23801. 5 | 148 | 0. 3296  | 9. 56439209  | 1  |
| MSTRG. 23809. 2 | 497 | 0. 37751 | 8. 898498535 | 1  |
| MSTRG. 23794. 1 | 260 | 0. 34284 | 4. 855773926 | 1  |
| MSTRG. 23794. 3 | 526 | 0. 40958 | 5. 942932129 | 1  |
| MSTRG. 23814. 1 | 348 | 0. 44488 | 6. 069763184 | 1  |
| MSTRG. 23817. 2 | 137 | 0. 28846 | 7. 590026855 | 1  |
| MSTRG. 23841. 3 | 256 | 0. 38464 | 8. 167663574 | -1 |
| MSTRG. 23841. 2 | 626 | 0. 3399  | 8. 152648926 | 1  |
| MSTRG. 23846. 1 | 82  | 0. 29772 | 10. 77105713 | 1  |
| MSTRG. 23846. 2 | 119 | 0. 29088 | 9. 812194824 | 1  |
| MSTRG. 23846. 3 | 119 | 0. 29088 | 9. 812194824 | 1  |
| MSTRG. 23847. 1 | 260 | 0. 40148 | 5. 78326416  | 1  |
| MSTRG. 23849. 1 | 56  | 0. 29408 | 6. 477478027 | -1 |
| MSTRG. 23855. 2 | 351 | 0. 34287 | 9. 528747559 | 1  |
| MSTRG. 23857. 1 | 208 | 0. 35823 | 7. 633483887 | 1  |
| MSTRG. 23857. 2 | 78  | 0. 32501 | 9. 222106934 | 1  |
| MSTRG. 23855. 3 | 430 | 0. 35483 | 8. 700378418 | 1  |
| MSTRG. 23855. 4 | 468 | 0. 29896 | 8. 734802246 | 1  |
| MSTRG. 23860. 1 | 525 | 0. 28546 | 9. 445983887 | 1  |
| MSTRG. 23860. 2 | 398 | 0. 37351 | 9. 398864746 | 1  |
| MSTRG. 23857. 3 | 68  | 0. 28679 | 4. 973449707 | 1  |
| MSTRG. 23855. 9 | 535 | 0. 36691 | 9. 279602051 | 1  |
| MSTRG. 23824. 1 | 49  | 0. 35728 | 4. 352355957 | 1  |
| MSTRG. 23825. 1 | 379 | 0. 28567 | 9. 275817871 | 1  |
| MSTRG. 23825. 3 | 379 | 0. 35269 | 9. 275817871 | 1  |
| MSTRG. 23825. 4 | 379 | 0. 36954 | 9. 275817871 | 1  |

|                  |     |          |              |    |
|------------------|-----|----------|--------------|----|
| MSTRG. 23825. 5  | 351 | 0. 28567 | 9. 312927246 | 1  |
| MSTRG. 23827. 1  | 121 | 0. 28982 | 7. 72479248  | 1  |
| MSTRG. 23828. 1  | 68  | 0. 3159  | 7. 825134277 | -1 |
| MSTRG. 23833. 1  | 291 | 0. 29088 | 9. 550842285 | 1  |
| MSTRG. 23834. 1  | 565 | 0. 42658 | 8. 930480957 | 1  |
| MSTRG. 23834. 2  | 658 | 0. 38824 | 8. 665100098 | 1  |
| MSTRG. 23834. 3  | 536 | 0. 29187 | 8. 984436035 | 1  |
| MSTRG. 23834. 4  | 536 | 0. 3582  | 8. 984436035 | 1  |
| MSTRG. 23834. 5  | 536 | 0. 29772 | 8. 984436035 | 1  |
| MSTRG. 23868. 2  | 420 | 0. 37891 | 9. 27154541  | 1  |
| MSTRG. 23868. 4  | 420 | 0. 37891 | 9. 27154541  | 1  |
| MSTRG. 23872. 6  | 444 | 0. 28014 | 8. 829040527 | 1  |
| MSTRG. 23872. 7  | 486 | 0. 3305  | 8. 512512207 | 1  |
| MSTRG. 23872. 3  | 486 | 0. 29912 | 8. 512512207 | 1  |
| MSTRG. 23872. 1  | 486 | 0. 29664 | 8. 512512207 | 1  |
| MSTRG. 23873. 1  | 173 | 0. 34416 | 11. 246521   | 1  |
| MSTRG. 23872. 8  | 184 | 0. 28338 | 8. 605529785 | 1  |
| MSTRG. 23872. 9  | 116 | 0. 31989 | 10. 31072998 | 1  |
| MSTRG. 23875. 1  | 148 | 0. 30808 | 10. 57745361 | 1  |
| MSTRG. 23872. 10 | 938 | 0. 37816 | 9. 321105957 | 1  |
| MSTRG. 23877. 6  | 827 | 0. 32514 | 9. 081115723 | 1  |
| MSTRG. 23878. 2  | 111 | 0. 27911 | 10. 95623779 | 1  |
| MSTRG. 23879. 2  | 787 | 0. 41011 | 7. 905578613 | -1 |
| MSTRG. 23879. 3  | 651 | 0. 40949 | 8. 739196777 | -1 |
| MSTRG. 23879. 4  | 147 | 0. 28002 | 3. 983459473 | 1  |
| MSTRG. 23880. 1  | 657 | 0. 32401 | 7. 703674316 | 1  |
| MSTRG. 23880. 3  | 615 | 0. 40626 | 8. 363586426 | 1  |
| MSTRG. 23881. 3  | 538 | 0. 37636 | 9. 211120605 | 1  |
| MSTRG. 23881. 5  | 538 | 0. 32817 | 9. 211120605 | 1  |
| MSTRG. 23883. 1  | 44  | 0. 43511 | 4. 74786377  | 1  |
| MSTRG. 23840. 2  | 204 | 0. 46041 | 9. 733703613 | 1  |
| MSTRG. 23890. 1  | 149 | 0. 32714 | 6. 308898926 | 1  |
| MSTRG. 23894. 3  | 632 | 0. 44564 | 9. 01361084  | 1  |
| MSTRG. 23898. 2  | 578 | 0. 41754 | 6. 074401855 | 1  |
| MSTRG. 23927. 1  | 88  | 0. 38495 | 6. 81829834  | 1  |
| MSTRG. 23929. 1  | 50  | 0. 34353 | 6. 219299316 | 1  |
| MSTRG. 23931. 3  | 462 | 0. 46739 | 4. 962219238 | 1  |
| MSTRG. 23933. 2  | 170 | 0. 47037 | 4. 609680176 | 1  |
| MSTRG. 23944. 2  | 152 | 0. 39449 | 6. 807922363 | 1  |
| MSTRG. 23946. 1  | 16  | 0. 39033 | 11. 00030518 | 1  |
| MSTRG. 23947. 1  | 821 | 0. 45263 | 8. 378601074 | 1  |
| MSTRG. 23947. 2  | 88  | 0. 28923 | 8. 842834473 | 1  |
| MSTRG. 23949. 1  | 614 | 0. 38292 | 8. 307067871 | 1  |
| MSTRG. 23949. 2  | 631 | 0. 41456 | 8. 559997559 | 1  |
| MSTRG. 23950. 1  | 54  | 0. 38825 | 8. 683288574 | 1  |
| MSTRG. 23950. 2  | 87  | 0. 3509  | 9. 913879395 | 1  |
| MSTRG. 23952. 2  | 403 | 0. 40097 | 9. 12677002  | 1  |
| MSTRG. 23952. 3  | 403 | 0. 37723 | 9. 12677002  | 1  |
| MSTRG. 23952. 5  | 366 | 0. 46047 | 9. 337219238 | -1 |
| MSTRG. 23952. 4  | 366 | 0. 46119 | 9. 337219238 | -1 |
| MSTRG. 23954. 3  | 541 | 0. 38846 | 4. 777160645 | 1  |
| MSTRG. 23954. 5  | 533 | 0. 32961 | 4. 706848145 | 1  |
| MSTRG. 23962. 5  | 157 | 0. 34147 | 9. 843688965 | 1  |
| MSTRG. 23962. 8  | 229 | 0. 27251 | 7. 743835449 | 1  |

|                  |      |          |              |    |
|------------------|------|----------|--------------|----|
| MSTRG. 23962. 4  | 169  | 0. 26837 | 7. 205993652 | 1  |
| MSTRG. 23962. 6  | 170  | 0. 31772 | 9. 325866699 | 1  |
| MSTRG. 23962. 1  | 257  | 0. 26913 | 8. 567443848 | 1  |
| MSTRG. 23962. 3  | 328  | 0. 35012 | 8. 914855957 | 1  |
| MSTRG. 23963. 1  | 162  | 0. 27264 | 9. 370422363 | 1  |
| MSTRG. 23964. 1  | 96   | 0. 28904 | 8. 954162598 | 1  |
| MSTRG. 23962. 11 | 155  | 0. 27429 | 9. 20513916  | 1  |
| MSTRG. 23962. 12 | 155  | 0. 27591 | 9. 20513916  | 1  |
| MSTRG. 23965. 1  | 132  | 0. 26837 | 9. 875793457 | 1  |
| MSTRG. 23966. 1  | 60   | 0. 33747 | 5. 995544434 | 1  |
| MSTRG. 23962. 13 | 169  | 0. 26837 | 7. 205993652 | 1  |
| MSTRG. 23967. 1  | 128  | 0. 2785  | 11. 33221436 | 1  |
| MSTRG. 23968. 1  | 141  | 0. 26913 | 10. 33599854 | 1  |
| MSTRG. 23958. 1  | 49   | 0. 35892 | 4. 713928223 | 1  |
| MSTRG. 23970. 2  | 89   | 0. 38169 | 6. 813781738 | 1  |
| MSTRG. 23976. 1  | 558  | 0. 45674 | 5. 878234863 | 1  |
| MSTRG. 23977. 1  | 405  | 0. 39303 | 10. 53704834 | 1  |
| MSTRG. 23981. 3  | 1197 | 0. 41568 | 5. 885192871 | 1  |
| MSTRG. 23981. 4  | 639  | 0. 41553 | 7. 655090332 | 1  |
| MSTRG. 23981. 5  | 380  | 0. 39889 | 5. 714904785 | 1  |
| MSTRG. 23981. 6  | 1197 | 0. 41568 | 5. 885192871 | 1  |
| MSTRG. 23981. 7  | 1197 | 0. 41897 | 5. 885192871 | 1  |
| MSTRG. 23981. 8  | 1366 | 0. 35131 | 7. 821716309 | 1  |
| MSTRG. 23983. 4  | 331  | 0. 4082  | 6. 247375488 | 1  |
| MSTRG. 23983. 3  | 521  | 0. 43849 | 10. 01397705 | 1  |
| MSTRG. 23998. 5  | 1525 | 0. 46488 | 5. 361755371 | -1 |
| MSTRG. 23998. 6  | 1525 | 0. 46488 | 5. 361755371 | -1 |
| MSTRG. 23998. 7  | 1525 | 0. 46488 | 5. 361755371 | -1 |
| MSTRG. 23999. 11 | 121  | 0. 30415 | 8. 504699707 | 1  |
| MSTRG. 24000. 2  | 104  | 0. 39016 | 5. 818786621 | 1  |
| MSTRG. 24004. 1  | 46   | 0. 3312  | 4. 734558105 | 1  |
| MSTRG. 23986. 1  | 26   | 0. 34997 | 10. 30621338 | 1  |
| MSTRG. 23986. 2  | 42   | 0. 37365 | 6. 520080566 | -1 |
| MSTRG. 23987. 2  | 54   | 0. 31444 | 8. 000793457 | 1  |
| MSTRG. 23988. 1  | 109  | 0. 26969 | 7. 72052002  | 1  |
| MSTRG. 23988. 2  | 182  | 0. 32237 | 9. 673034668 | 1  |
| MSTRG. 23989. 1  | 88   | 0. 27772 | 8. 56817627  | 1  |
| MSTRG. 23988. 3  | 116  | 0. 31044 | 9. 271789551 | 1  |
| MSTRG. 23988. 4  | 183  | 0. 29367 | 9. 649230957 | 1  |
| MSTRG. 23990. 1  | 240  | 0. 33581 | 6. 90423584  | 1  |
| MSTRG. 23990. 2  | 143  | 0. 29772 | 6. 858459473 | 1  |
| MSTRG. 23990. 3  | 143  | 0. 29772 | 6. 858459473 | 1  |
| MSTRG. 23991. 1  | 173  | 0. 29292 | 5. 527160645 | 1  |
| MSTRG. 23992. 1  | 176  | 0. 45602 | 8. 62701416  | 1  |
| MSTRG. 23984. 1  | 151  | 0. 34812 | 11. 2555542  | 1  |
| MSTRG. 23995. 1  | 1024 | 0. 46382 | 7. 528259277 | 1  |
| MSTRG. 23995. 4  | 63   | 0. 28742 | 8. 890319824 | 1  |
| MSTRG. 23996. 4  | 46   | 0. 4116  | 9. 35345459  | 1  |
| MSTRG. 23997. 1  | 84   | 0. 32947 | 9. 513000488 | 1  |
| MSTRG. 24007. 1  | 61   | 0. 32883 | 9. 588806152 | -1 |
| MSTRG. 24020. 1  | 1675 | 0. 472   | 5. 480895996 | 1  |
| MSTRG. 24020. 3  | 47   | 0. 34398 | 9. 781799316 | 1  |
| MSTRG. 24020. 4  | 47   | 0. 3415  | 9. 781799316 | 1  |
| MSTRG. 24023. 1  | 155  | 0. 37175 | 10. 49542236 | -1 |

|                  |      |          |              |   |
|------------------|------|----------|--------------|---|
| MSTRG. 24022. 3  | 67   | 0. 35776 | 9. 217712402 | 1 |
| MSTRG. 24026. 3  | 322  | 0. 29343 | 8. 824890137 | 1 |
| MSTRG. 24026. 1  | 450  | 0. 47683 | 6. 390441895 | 1 |
| MSTRG. 24026. 4  | 247  | 0. 3731  | 9. 199890137 | 1 |
| MSTRG. 24027. 1  | 398  | 0. 31917 | 8. 355041504 | 1 |
| MSTRG. 24011. 2  | 639  | 0. 47521 | 5. 424743652 | 1 |
| MSTRG. 24013. 3  | 902  | 0. 42735 | 7. 150817871 | 1 |
| MSTRG. 24013. 5  | 931  | 0. 41246 | 6. 248962402 | 1 |
| MSTRG. 24014. 1  | 19   | 0. 3836  | 5. 940979004 | 1 |
| MSTRG. 24015. 1  | 108  | 0. 28478 | 9. 273376465 | 1 |
| MSTRG. 24016. 2  | 210  | 0. 29835 | 8. 999450684 | 1 |
| MSTRG. 24017. 3  | 605  | 0. 44534 | 9. 25604248  | 1 |
| MSTRG. 24019. 1  | 585  | 0. 3787  | 6. 439025879 | 1 |
| MSTRG. 24019. 2  | 73   | 0. 33422 | 8. 976623535 | 1 |
| MSTRG. 24031. 2  | 184  | 0. 41737 | 10. 22686768 | 1 |
| MSTRG. 24035. 1  | 1564 | 0. 44095 | 6. 020202637 | 1 |
| MSTRG. 24035. 3  | 87   | 0. 37815 | 9. 421325684 | 1 |
| MSTRG. 24036. 1  | 91   | 0. 29812 | 4. 973327637 | 1 |
| MSTRG. 24037. 1  | 109  | 0. 32536 | 9. 670349121 | 1 |
| MSTRG. 24049. 1  | 718  | 0. 45349 | 6. 341247559 | 1 |
| MSTRG. 24049. 2  | 738  | 0. 45349 | 6. 174377441 | 1 |
| MSTRG. 24049. 8  | 735  | 0. 40998 | 6. 122741699 | 1 |
| MSTRG. 24049. 9  | 738  | 0. 42794 | 6. 174377441 | 1 |
| MSTRG. 24049. 10 | 738  | 0. 45277 | 6. 174377441 | 1 |
| MSTRG. 24049. 12 | 512  | 0. 36389 | 5. 643371582 | 1 |
| MSTRG. 24050. 2  | 181  | 0. 43561 | 6. 437561035 | 1 |
| MSTRG. 24050. 3  | 250  | 0. 40691 | 6. 200134277 | 1 |
| MSTRG. 24051. 1  | 103  | 0. 36856 | 10. 42279053 | 1 |
| MSTRG. 24041. 2  | 324  | 0. 47141 | 4. 24822998  | 1 |
| MSTRG. 24057. 3  | 443  | 0. 45818 | 6. 450744629 | 1 |
| MSTRG. 24057. 4  | 443  | 0. 42551 | 6. 450744629 | 1 |
| MSTRG. 24058. 1  | 67   | 0. 33054 | 9. 368591309 | 1 |
| MSTRG. 24058. 2  | 67   | 0. 42936 | 10. 76287842 | 1 |
| MSTRG. 24062. 1  | 1372 | 0. 4238  | 4. 926330566 | 1 |
| MSTRG. 24062. 5  | 1295 | 0. 47697 | 4. 927307129 | 1 |
| MSTRG. 24062. 6  | 1294 | 0. 47697 | 4. 927307129 | 1 |
| MSTRG. 24062. 8  | 1346 | 0. 47697 | 4. 909729004 | 1 |
| MSTRG. 24062. 9  | 1351 | 0. 47917 | 4. 909729004 | 1 |
| MSTRG. 24059. 1  | 96   | 0. 33738 | 6. 580627441 | 1 |
| MSTRG. 24059. 3  | 96   | 0. 34767 | 6. 580627441 | 1 |
| MSTRG. 24059. 4  | 96   | 0. 34542 | 6. 580627441 | 1 |
| MSTRG. 24063. 1  | 184  | 0. 35137 | 7. 16607666  | 1 |
| MSTRG. 24063. 2  | 185  | 0. 35137 | 7. 16607666  | 1 |
| MSTRG. 24063. 3  | 185  | 0. 35578 | 7. 16607666  | 1 |
| MSTRG. 24063. 6  | 165  | 0. 3431  | 6. 96307373  | 1 |
| MSTRG. 24071. 2  | 146  | 0. 42131 | 9. 149353027 | 1 |
| MSTRG. 24071. 1  | 146  | 0. 41515 | 9. 149353027 | 1 |
| MSTRG. 24081. 1  | 604  | 0. 48253 | 7. 572692871 | 1 |
| MSTRG. 24081. 2  | 604  | 0. 48473 | 8. 030212402 | 1 |
| MSTRG. 24081. 9  | 596  | 0. 42619 | 8. 033874512 | 1 |
| MSTRG. 24081. 5  | 604  | 0. 42495 | 7. 572692871 | 1 |
| MSTRG. 24081. 7  | 426  | 0. 42144 | 9. 344177246 | 1 |
| MSTRG. 24081. 10 | 605  | 0. 42619 | 7. 572692871 | 1 |
| MSTRG. 24075. 2  | 238  | 0. 37431 | 9. 814880371 | 1 |

|                  |      |          |              |    |
|------------------|------|----------|--------------|----|
| MSTRG. 24082. 1  | 937  | 0. 45427 | 5. 223815918 | 1  |
| MSTRG. 24082. 4  | 897  | 0. 45602 | 5. 064147949 | 1  |
| MSTRG. 24082. 3  | 937  | 0. 4734  | 5. 223815918 | 1  |
| MSTRG. 24086. 1  | 789  | 0. 42753 | 6. 94342041  | 1  |
| MSTRG. 24093. 3  | 201  | 0. 27251 | 8. 468811035 | 1  |
| MSTRG. 24095. 3  | 1002 | 0. 44936 | 9. 124206543 | 1  |
| MSTRG. 24095. 2  | 1002 | 0. 46664 | 9. 124206543 | 1  |
| MSTRG. 24098. 3  | 497  | 0. 44737 | 8. 463317871 | 1  |
| MSTRG. 24098. 4  | 379  | 0. 44137 | 8. 408996582 | 1  |
| MSTRG. 24099. 1  | 33   | 0. 41208 | 9. 842956543 | 1  |
| MSTRG. 24102. 1  | 114  | 0. 34431 | 6. 04486084  | 1  |
| MSTRG. 24104. 1  | 139  | 0. 30788 | 9. 45904541  | 1  |
| MSTRG. 24105. 1  | 53   | 0. 43394 | 5. 934753418 | 1  |
| MSTRG. 24105. 2  | 42   | 0. 37298 | 11. 16595459 | 1  |
| MSTRG. 24107. 1  | 151  | 0. 35342 | 9. 276672363 | 1  |
| MSTRG. 24108. 1  | 38   | 0. 33798 | 10. 90325928 | 1  |
| MSTRG. 24111. 2  | 248  | 0. 343   | 10. 222229   | 1  |
| MSTRG. 24112. 1  | 59   | 0. 33363 | 11. 90570068 | 1  |
| MSTRG. 24113. 3  | 226  | 0. 45347 | 4. 742370605 | 1  |
| MSTRG. 24114. 2  | 291  | 0. 36315 | 10. 17230225 | 1  |
| MSTRG. 24115. 1  | 307  | 0. 45963 | 9. 438293457 | 1  |
| MSTRG. 24115. 3  | 307  | 0. 4347  | 9. 438293457 | 1  |
| MSTRG. 24117. 2  | 324  | 0. 36298 | 6. 355285645 | 1  |
| MSTRG. 24117. 3  | 324  | 0. 40306 | 6. 355285645 | 1  |
| MSTRG. 24125. 1  | 73   | 0. 31301 | 9. 207824707 | 1  |
| MSTRG. 24125. 2  | 31   | 0. 3135  | 5. 060241699 | -1 |
| MSTRG. 24123. 1  | 418  | 0. 36383 | 5. 666320801 | 1  |
| MSTRG. 24127. 1  | 305  | 0. 293   | 9. 65020752  | 1  |
| MSTRG. 24134. 2  | 64   | 0. 41923 | 6. 078918457 | 1  |
| MSTRG. 24135. 4  | 200  | 0. 33513 | 5. 02166748  | 1  |
| MSTRG. 24135. 2  | 760  | 0. 43588 | 9. 051696777 | 1  |
| MSTRG. 24135. 6  | 496  | 0. 45316 | 7. 590393066 | 1  |
| MSTRG. 24136. 8  | 86   | 0. 30172 | 4. 14666748  | 1  |
| MSTRG. 24136. 9  | 86   | 0. 38209 | 4. 14666748  | 1  |
| MSTRG. 24139. 1  | 80   | 0. 30945 | 10. 21563721 | 1  |
| MSTRG. 24140. 1  | 67   | 0. 33794 | 6. 218566895 | 1  |
| MSTRG. 24147. 2  | 535  | 0. 34699 | 4. 760314941 | 1  |
| MSTRG. 24173. 1  | 1667 | 0. 43642 | 7. 323669434 | 1  |
| MSTRG. 24173. 3  | 2840 | 0. 47053 | 7. 106262207 | 1  |
| MSTRG. 24173. 4  | 2581 | 0. 42979 | 6. 718078613 | 1  |
| MSTRG. 24173. 2  | 2996 | 0. 43179 | 7. 366760254 | 1  |
| MSTRG. 24173. 6  | 2819 | 0. 45433 | 6. 90411377  | 1  |
| MSTRG. 24173. 7  | 2840 | 0. 46901 | 7. 106262207 | 1  |
| MSTRG. 24173. 5  | 2996 | 0. 46901 | 7. 366760254 | 1  |
| MSTRG. 24173. 10 | 2688 | 0. 46253 | 7. 027282715 | 1  |
| MSTRG. 24173. 8  | 2995 | 0. 45433 | 7. 366760254 | 1  |
| MSTRG. 24173. 9  | 2975 | 0. 46901 | 7. 10736084  | 1  |
| MSTRG. 24173. 13 | 2841 | 0. 45433 | 7. 106262207 | 1  |
| MSTRG. 24173. 14 | 2581 | 0. 44047 | 6. 718078613 | 1  |
| MSTRG. 24173. 11 | 2975 | 0. 45433 | 7. 10736084  | 1  |
| MSTRG. 24173. 12 | 2995 | 0. 45433 | 7. 366760254 | 1  |
| MSTRG. 24173. 15 | 2541 | 0. 42979 | 6. 911193848 | 1  |
| MSTRG. 24173. 16 | 2819 | 0. 47328 | 6. 90411377  | 1  |
| MSTRG. 24173. 17 | 2845 | 0. 47361 | 6. 822937012 | 1  |

|                  |      |          |              |    |
|------------------|------|----------|--------------|----|
| MSTRG. 24175. 1  | 26   | 0. 38051 | 5. 969055176 | 1  |
| MSTRG. 24148. 2  | 244  | 0. 36444 | 9. 298400879 | 1  |
| MSTRG. 24152. 1  | 76   | 0. 33904 | 4. 56817627  | 1  |
| MSTRG. 24162. 1  | 53   | 0. 32814 | 5. 410461426 | 1  |
| MSTRG. 24163. 1  | 100  | 0. 31514 | 9. 608459473 | 1  |
| MSTRG. 24164. 1  | 82   | 0. 40358 | 10. 46258545 | 1  |
| MSTRG. 24163. 2  | 527  | 0. 38657 | 8. 354064941 | 1  |
| MSTRG. 24163. 4  | 153  | 0. 31035 | 8. 200256348 | 1  |
| MSTRG. 24163. 5  | 237  | 0. 41563 | 10. 17584229 | -1 |
| MSTRG. 24163. 6  | 100  | 0. 2675  | 9. 608459473 | 1  |
| MSTRG. 24158. 1  | 316  | 0. 41477 | 7. 98614502  | 1  |
| MSTRG. 24153. 1  | 173  | 0. 35065 | 10. 59710693 | 1  |
| MSTRG. 24168. 1  | 217  | 0. 46626 | 6. 690368652 | 1  |
| MSTRG. 24171. 1  | 52   | 0. 36517 | 5. 012756348 | 1  |
| MSTRG. 24172. 1  | 2232 | 0. 4259  | 6. 603088379 | 1  |
| MSTRG. 24172. 2  | 2092 | 0. 47541 | 6. 446105957 | 1  |
| MSTRG. 24184. 1  | 197  | 0. 32436 | 6. 750793457 | 1  |
| MSTRG. 24184. 3  | 125  | 0. 41524 | 10. 21685791 | 1  |
| MSTRG. 24184. 4  | 139  | 0. 35497 | 10. 3616333  | 1  |
| MSTRG. 24185. 3  | 658  | 0. 42681 | 5. 808410645 | 1  |
| MSTRG. 24187. 1  | 259  | 0. 39572 | 8. 708679199 | 1  |
| MSTRG. 24187. 2  | 259  | 0. 45353 | 8. 708679199 | 1  |
| MSTRG. 24187. 3  | 225  | 0. 4258  | 8. 92779541  | 1  |
| MSTRG. 24187. 4  | 259  | 0. 44124 | 8. 708679199 | 1  |
| MSTRG. 24187. 5  | 188  | 0. 44332 | 12. 19952393 | 1  |
| MSTRG. 24183. 1  | 28   | 0. 42212 | 8. 80279541  | 1  |
| MSTRG. 24190. 6  | 288  | 0. 34434 | 9. 753967285 | 1  |
| MSTRG. 24195. 1  | 63   | 0. 37264 | 10. 45001221 | 1  |
| MSTRG. 24197. 1  | 110  | 0. 32022 | 9. 300598145 | 1  |
| MSTRG. 24198. 1  | 1001 | 0. 33114 | 7. 299133301 | 1  |
| MSTRG. 24198. 2  | 1001 | 0. 35371 | 7. 299133301 | 1  |
| MSTRG. 24201. 3  | 612  | 0. 44912 | 6. 40411377  | 1  |
| MSTRG. 24204. 4  | 431  | 0. 45238 | 5. 463195801 | 1  |
| MSTRG. 24209. 1  | 493  | 0. 37537 | 4. 835632324 | 1  |
| MSTRG. 24209. 3  | 1488 | 0. 45808 | 5. 869567871 | 1  |
| MSTRG. 24209. 4  | 850  | 0. 36669 | 5. 532043457 | 1  |
| MSTRG. 24211. 2  | 559  | 0. 32719 | 7. 67779541  | 1  |
| MSTRG. 24211. 3  | 201  | 0. 32642 | 5. 483581543 | 1  |
| MSTRG. 24212. 1  | 80   | 0. 33415 | 6. 850036621 | 1  |
| MSTRG. 24207. 5  | 170  | 0. 30576 | 7. 909484863 | 1  |
| MSTRG. 24207. 4  | 187  | 0. 27958 | 6. 710144043 | 1  |
| MSTRG. 24215. 1  | 106  | 0. 39212 | 9. 034240723 | 1  |
| MSTRG. 24214. 3  | 743  | 0. 47159 | 7. 59979248  | 1  |
| MSTRG. 24214. 4  | 670  | 0. 44299 | 8. 687927246 | 1  |
| MSTRG. 24216. 1  | 200  | 0. 29783 | 8. 720275879 | 1  |
| MSTRG. 24222. 1  | 45   | 0. 36918 | 5. 963562012 | 1  |
| MSTRG. 24223. 1  | 98   | 0. 32198 | 9. 760681152 | 1  |
| MSTRG. 24224. 1  | 318  | 0. 3227  | 9. 711364746 | 1  |
| MSTRG. 24225. 2  | 1048 | 0. 41597 | 5. 406921387 | 1  |
| MSTRG. 24228. 5  | 258  | 0. 41079 | 9. 549377441 | 1  |
| MSTRG. 24228. 6  | 226  | 0. 41141 | 9. 647521973 | 1  |
| MSTRG. 24228. 7  | 155  | 0. 35238 | 8. 692687988 | -1 |
| MSTRG. 24229. 7  | 709  | 0. 46636 | 8. 336608887 | 1  |
| MSTRG. 24229. 10 | 128  | 0. 37157 | 9. 758850098 | 1  |



|                 |      |          |              |    |
|-----------------|------|----------|--------------|----|
| MSTRG. 24218. 3 | 144  | 0. 37361 | 5. 727233887 | 1  |
| MSTRG. 24230. 2 | 255  | 0. 44259 | 4. 632507324 | 1  |
| MSTRG. 24232. 3 | 105  | 0. 34063 | 10. 01812744 | 1  |
| MSTRG. 24233. 3 | 1028 | 0. 43512 | 9. 32989502  | 1  |
| MSTRG. 24236. 3 | 206  | 0. 37413 | 5. 497131348 | 1  |
| MSTRG. 24252. 5 | 480  | 0. 38971 | 4. 799621582 | 1  |
| MSTRG. 24252. 6 | 1412 | 0. 44617 | 6. 227355957 | 1  |
| MSTRG. 24252. 7 | 150  | 0. 40325 | 4. 746276855 | 1  |
| MSTRG. 24252. 8 | 1001 | 0. 34069 | 9. 231384277 | 1  |
| MSTRG. 24252. 9 | 970  | 0. 33883 | 9. 231506348 | 1  |
| MSTRG. 24250. 1 | 585  | 0. 42108 | 8. 785461426 | 1  |
| MSTRG. 24250. 3 | 304  | 0. 39307 | 6. 427062988 | 1  |
| MSTRG. 24250. 5 | 304  | 0. 36401 | 6. 427062988 | 1  |
| MSTRG. 24250. 8 | 533  | 0. 43537 | 8. 813659668 | 1  |
| MSTRG. 24250. 4 | 533  | 0. 44263 | 8. 813659668 | 1  |
| MSTRG. 24250. 2 | 533  | 0. 43715 | 8. 813659668 | 1  |
| MSTRG. 24250. 7 | 519  | 0. 42329 | 8. 003479004 | 1  |
| MSTRG. 24257. 5 | 81   | 0. 31454 | 9. 238830566 | 1  |
| MSTRG. 24257. 4 | 410  | 0. 29772 | 6. 968566895 | 1  |
| MSTRG. 24257. 3 | 410  | 0. 29772 | 6. 968566895 | 1  |
| MSTRG. 24258. 5 | 1330 | 0. 46672 | 5. 594055176 | 1  |
| MSTRG. 24258. 4 | 1311 | 0. 44851 | 5. 693054199 | 1  |
| MSTRG. 24260. 1 | 118  | 0. 44224 | 9. 723815918 | -1 |
| MSTRG. 24262. 1 | 62   | 0. 40759 | 9. 780212402 | 1  |
| MSTRG. 24265. 2 | 364  | 0. 40762 | 9. 686584473 | 1  |
| MSTRG. 24265. 3 | 364  | 0. 39992 | 9. 686584473 | 1  |
| MSTRG. 24265. 5 | 364  | 0. 39992 | 9. 686584473 | 1  |
| MSTRG. 24265. 6 | 227  | 0. 42227 | 9. 671936035 | 1  |
| MSTRG. 24268. 2 | 294  | 0. 45315 | 5. 565124512 | 1  |
| MSTRG. 24269. 3 | 90   | 0. 27577 | 9. 616638184 | 1  |
| MSTRG. 24269. 2 | 278  | 0. 42565 | 9. 392028809 | -1 |
| MSTRG. 24273. 1 | 92   | 0. 33287 | 6. 793273926 | 1  |
| MSTRG. 24275. 2 | 505  | 0. 43737 | 5. 89276123  | 1  |
| MSTRG. 24276. 2 | 998  | 0. 44673 | 5. 320739746 | 1  |
| MSTRG. 24276. 3 | 995  | 0. 44793 | 5. 318786621 | 1  |
| MSTRG. 24285. 2 | 1583 | 0. 4535  | 5. 598327637 | 1  |
| MSTRG. 24285. 3 | 1202 | 0. 35907 | 5. 902893066 | 1  |
| MSTRG. 24286. 2 | 151  | 0. 27327 | 8. 237731934 | 1  |
| MSTRG. 24286. 3 | 263  | 0. 28387 | 6. 95513916  | 1  |
| MSTRG. 24288. 2 | 99   | 0. 32533 | 5. 216125488 | 1  |
| MSTRG. 24288. 3 | 215  | 0. 30191 | 10. 67279053 | 1  |
| MSTRG. 24288. 4 | 215  | 0. 28982 | 10. 67279053 | 1  |
| MSTRG. 24283. 3 | 81   | 0. 41507 | 7. 707824707 | 1  |
| MSTRG. 24283. 5 | 541  | 0. 38939 | 9. 204650879 | 1  |
| MSTRG. 24283. 6 | 591  | 0. 39754 | 9. 227355957 | -1 |
| MSTRG. 24282. 2 | 133  | 0. 45821 | 5. 519226074 | 1  |
| MSTRG. 24289. 3 | 225  | 0. 40569 | 9. 273620605 | 1  |
| MSTRG. 24289. 2 | 85   | 0. 3535  | 11. 87872314 | 1  |
| MSTRG. 24290. 3 | 355  | 0. 41205 | 9. 352478027 | 1  |
| MSTRG. 24291. 1 | 297  | 0. 3642  | 8. 802307129 | 1  |
| MSTRG. 24296. 1 | 167  | 0. 28862 | 8. 837097168 | 1  |
| MSTRG. 24297. 2 | 122  | 0. 34451 | 11. 81317139 | 1  |
| MSTRG. 24297. 1 | 910  | 0. 37071 | 7. 642883301 | 1  |
| MSTRG. 24297. 3 | 940  | 0. 39326 | 7. 63885498  | 1  |

|                 |      |          |              |    |
|-----------------|------|----------|--------------|----|
| MSTRG. 24297. 6 | 910  | 0. 39546 | 7. 642883301 | 1  |
| MSTRG. 24297. 9 | 940  | 0. 34475 | 7. 63885498  | 1  |
| MSTRG. 24295. 1 | 59   | 0. 34127 | 9. 578308105 | 1  |
| MSTRG. 24302. 1 | 92   | 0. 30176 | 5. 11895752  | 1  |
| MSTRG. 24303. 1 | 705  | 0. 42852 | 9. 118835449 | 1  |
| MSTRG. 24313. 2 | 778  | 0. 43908 | 4. 952819824 | 1  |
| MSTRG. 24315. 1 | 243  | 0. 2908  | 9. 13470459  | 1  |
| MSTRG. 24314. 2 | 507  | 0. 3618  | 7. 242370605 | 1  |
| MSTRG. 24318. 1 | 1189 | 0. 36391 | 7. 001403809 | 1  |
| MSTRG. 24318. 2 | 1165 | 0. 38441 | 6. 742004395 | 1  |
| MSTRG. 24318. 3 | 1002 | 0. 34996 | 6. 056945801 | 1  |
| MSTRG. 24318. 4 | 999  | 0. 33172 | 6. 08795166  | 1  |
| MSTRG. 24306. 2 | 440  | 0. 45263 | 8. 334411621 | 1  |
| MSTRG. 24306. 3 | 518  | 0. 45135 | 6. 845153809 | 1  |
| MSTRG. 24307. 1 | 140  | 0. 43625 | 8. 461608887 | 1  |
| MSTRG. 24307. 2 | 140  | 0. 37207 | 8. 461608887 | 1  |
| MSTRG. 24307. 3 | 140  | 0. 39389 | 8. 461608887 | 1  |
| MSTRG. 24307. 4 | 140  | 0. 3956  | 8. 461608887 | 1  |
| MSTRG. 24309. 1 | 282  | 0. 42643 | 9. 774230957 | 1  |
| MSTRG. 24305. 1 | 257  | 0. 40559 | 7. 865905762 | 1  |
| MSTRG. 24304. 4 | 217  | 0. 43035 | 9. 57635498  | 1  |
| MSTRG. 24328. 2 | 905  | 0. 45884 | 4. 166809082 | 1  |
| MSTRG. 24328. 5 | 211  | 0. 32066 | 8. 543762207 | 1  |
| MSTRG. 24328. 7 | 269  | 0. 29212 | 10. 74578857 | 1  |
| MSTRG. 24328. 8 | 1068 | 0. 39161 | 4. 448303223 | 1  |
| MSTRG. 24336. 3 | 135  | 0. 39404 | 5. 327697754 | 1  |
| MSTRG. 24338. 6 | 664  | 0. 48664 | 5. 834777832 | 1  |
| MSTRG. 24339. 1 | 651  | 0. 45984 | 8. 022766113 | 1  |
| MSTRG. 24340. 1 | 133  | 0. 37271 | 8. 371765137 | -1 |
| MSTRG. 24341. 3 | 673  | 0. 38753 | 5. 638977051 | 1  |
| MSTRG. 24344. 1 | 74   | 0. 34961 | 7. 755554199 | 1  |
| MSTRG. 24346. 1 | 123  | 0. 4387  | 4. 605041504 | 1  |
| MSTRG. 24346. 6 | 296  | 0. 40534 | 4. 989929199 | 1  |
| MSTRG. 24346. 2 | 123  | 0. 44564 | 4. 605041504 | 1  |
| MSTRG. 24346. 3 | 123  | 0. 37628 | 4. 605041504 | 1  |
| MSTRG. 24346. 5 | 123  | 0. 3738  | 4. 605041504 | 1  |
| MSTRG. 24346. 4 | 123  | 0. 37628 | 4. 605041504 | 1  |
| MSTRG. 24346. 7 | 123  | 0. 37628 | 4. 605041504 | 1  |
| MSTRG. 24348. 3 | 154  | 0. 41626 | 5. 074401855 | 1  |
| MSTRG. 24350. 3 | 958  | 0. 40325 | 5. 493347168 | 1  |
| MSTRG. 24350. 4 | 905  | 0. 36609 | 5. 402282715 | 1  |
| MSTRG. 24350. 5 | 1269 | 0. 44062 | 5. 330749512 | 1  |
| MSTRG. 24351. 7 | 520  | 0. 33417 | 5. 743103027 | 1  |
| MSTRG. 24351. 5 | 552  | 0. 32687 | 6. 035949707 | 1  |
| MSTRG. 24351. 4 | 520  | 0. 34177 | 5. 743103027 | 1  |
| MSTRG. 24351. 1 | 520  | 0. 32108 | 5. 743103027 | 1  |
| MSTRG. 24351. 3 | 741  | 0. 45935 | 6. 949157715 | 1  |
| MSTRG. 24351. 2 | 741  | 0. 38968 | 6. 949157715 | 1  |
| MSTRG. 24352. 1 | 109  | 0. 37513 | 7. 664123535 | 1  |
| MSTRG. 24356. 3 | 219  | 0. 44435 | 7. 787536621 | 1  |
| MSTRG. 24357. 1 | 491  | 0. 37829 | 10. 25958252 | 1  |
| MSTRG. 24357. 3 | 328  | 0. 31025 | 9. 974182129 | 1  |
| MSTRG. 24358. 5 | 1293 | 0. 45721 | 8. 461975098 | 1  |
| MSTRG. 24364. 1 | 279  | 0. 41151 | 5. 925598145 | 1  |

|                  |      |          |              |    |
|------------------|------|----------|--------------|----|
| MSTRG. 24365. 4  | 1984 | 0. 45891 | 7. 122497559 | 1  |
| MSTRG. 24365. 8  | 1973 | 0. 483   | 7. 438781738 | 1  |
| MSTRG. 24365. 9  | 1938 | 0. 483   | 7. 440734863 | 1  |
| MSTRG. 24365. 10 | 1987 | 0. 45891 | 7. 122497559 | 1  |
| MSTRG. 24365. 11 | 1973 | 0. 483   | 7. 438781738 | 1  |
| MSTRG. 24365. 6  | 1994 | 0. 44351 | 7. 122253418 | 1  |
| MSTRG. 24365. 3  | 1980 | 0. 46914 | 7. 438415527 | 1  |
| MSTRG. 24365. 5  | 1973 | 0. 483   | 7. 438781738 | 1  |
| MSTRG. 24365. 1  | 1973 | 0. 483   | 7. 311462402 | 1  |
| MSTRG. 24365. 12 | 1963 | 0. 45891 | 7. 015441895 | 1  |
| MSTRG. 24365. 13 | 1984 | 0. 45891 | 7. 246398926 | 1  |
| MSTRG. 24365. 14 | 2009 | 0. 46914 | 7. 578552246 | 1  |
| MSTRG. 24366. 1  | 61   | 0. 33162 | 6. 367004395 | 1  |
| MSTRG. 24367. 1  | 0    | 0. 41117 | 0            | -1 |
| MSTRG. 24374. 2  | 390  | 0. 42013 | 5. 398498535 | 1  |
| MSTRG. 24376. 1  | 167  | 0. 40693 | 9. 64263916  | 1  |
| MSTRG. 24376. 2  | 137  | 0. 45808 | 10. 02301025 | 1  |
| MSTRG. 24376. 5  | 167  | 0. 41941 | 9. 64263916  | 1  |
| MSTRG. 24376. 6  | 137  | 0. 36483 | 10. 02301025 | 1  |
| MSTRG. 24378. 4  | 170  | 0. 37349 | 5. 351135254 | 1  |
| MSTRG. 24378. 5  | 170  | 0. 42629 | 5. 351135254 | 1  |
| MSTRG. 24379. 1  | 306  | 0. 37643 | 5. 668762207 | 1  |
| MSTRG. 24379. 2  | 306  | 0. 4001  | 5. 668762207 | 1  |
| MSTRG. 24380. 1  | 86   | 0. 46981 | 8. 736877441 | -1 |
| MSTRG. 24359. 2  | 264  | 0. 32156 | 8. 135192871 | 1  |
| MSTRG. 24359. 3  | 262  | 0. 29135 | 6. 941955566 | 1  |
| MSTRG. 24361. 2  | 278  | 0. 38265 | 3. 981140137 | 1  |
| MSTRG. 24382. 5  | 1604 | 0. 38138 | 8. 902526855 | 1  |
| MSTRG. 24387. 6  | 84   | 0. 40368 | 10. 73760986 | -1 |
| MSTRG. 24387. 1  | 84   | 0. 43183 | 10. 73760986 | -1 |
| MSTRG. 24387. 3  | 113  | 0. 38363 | 5. 804992676 | 1  |
| MSTRG. 24387. 4  | 64   | 0. 37576 | 6. 070251465 | 1  |
| MSTRG. 24389. 1  | 155  | 0. 29236 | 8. 915100098 | 1  |
| MSTRG. 24387. 7  | 116  | 0. 29099 | 6. 090881348 | 1  |
| MSTRG. 24390. 8  | 1810 | 0. 462   | 6. 653381348 | 1  |
| MSTRG. 24384. 3  | 1170 | 0. 39213 | 5. 958068848 | 1  |
| MSTRG. 24384. 2  | 1265 | 0. 40025 | 5. 633239746 | 1  |
| MSTRG. 24397. 1  | 104  | 0. 36638 | 5. 355407715 | 1  |
| MSTRG. 24398. 1  | 47   | 0. 43808 | 10. 08221436 | 1  |
| MSTRG. 24397. 3  | 186  | 0. 38247 | 10. 01483154 | 1  |
| MSTRG. 24398. 4  | 166  | 0. 44863 | 4. 805480957 | 1  |
| MSTRG. 24400. 1  | 847  | 0. 31385 | 8. 250671387 | 1  |
| MSTRG. 24405. 1  | 144  | 0. 33119 | 5. 526794434 | 1  |
| MSTRG. 24405. 3  | 345  | 0. 37162 | 8. 659118652 | 1  |
| MSTRG. 24405. 4  | 152  | 0. 30069 | 9. 43536377  | 1  |
| MSTRG. 24406. 3  | 145  | 0. 43362 | 10. 5536499  | 1  |
| MSTRG. 24408. 1  | 69   | 0. 34295 | 10. 29022217 | 1  |
| MSTRG. 24408. 2  | 45   | 0. 39873 | 11. 32647705 | 1  |
| MSTRG. 24410. 3  | 201  | 0. 31164 | 4. 807800293 | 1  |
| MSTRG. 24412. 1  | 1343 | 0. 47477 | 5. 301086426 | 1  |
| MSTRG. 24412. 2  | 1976 | 0. 47183 | 5. 436218262 | 1  |
| MSTRG. 24413. 1  | 205  | 0. 36831 | 9. 024475098 | 1  |
| MSTRG. 24401. 1  | 261  | 0. 27599 | 9. 56036377  | 1  |
| MSTRG. 24404. 2  | 211  | 0. 29492 | 9. 845397949 | 1  |

|                  |      |          |              |    |
|------------------|------|----------|--------------|----|
| MSTRG. 24415. 7  | 97   | 0. 45173 | 5. 397521973 | 1  |
| MSTRG. 24415. 3  | 125  | 0. 46475 | 4. 621398926 | 1  |
| MSTRG. 24415. 5  | 138  | 0. 34349 | 4. 863830566 | 1  |
| MSTRG. 24415. 4  | 138  | 0. 43888 | 4. 863830566 | 1  |
| MSTRG. 24415. 6  | 125  | 0. 47256 | 4. 621398926 | 1  |
| MSTRG. 24415. 2  | 138  | 0. 48329 | 4. 863830566 | 1  |
| MSTRG. 24417. 1  | 476  | 0. 37154 | 6. 915222168 | 1  |
| MSTRG. 24417. 6  | 421  | 0. 32507 | 7. 671081543 | 1  |
| MSTRG. 24417. 5  | 476  | 0. 31117 | 6. 915222168 | 1  |
| MSTRG. 24419. 1  | 198  | 0. 33119 | 7. 557922363 | 1  |
| MSTRG. 24419. 2  | 126  | 0. 28711 | 9. 273254395 | 1  |
| MSTRG. 24420. 1  | 105  | 0. 38979 | 9. 16619873  | 1  |
| MSTRG. 24421. 1  | 168  | 0. 32985 | 10. 77252197 | 1  |
| MSTRG. 24424. 2  | 190  | 0. 30781 | 5. 565490723 | 1  |
| MSTRG. 24436. 1  | 107  | 0. 36297 | 10. 05670166 | 1  |
| MSTRG. 24442. 2  | 4292 | 0. 43858 | 5. 594665527 | 1  |
| MSTRG. 24443. 1  | 363  | 0. 30064 | 8. 280334473 | 1  |
| MSTRG. 24429. 7  | 87   | 0. 37058 | 9. 568054199 | 1  |
| MSTRG. 24429. 5  | 47   | 0. 34449 | 10. 13238525 | 1  |
| MSTRG. 24429. 6  | 47   | 0. 38487 | 10. 13238525 | 1  |
| MSTRG. 24429. 1  | 76   | 0. 33391 | 8. 752624512 | 1  |
| MSTRG. 24429. 2  | 131  | 0. 30753 | 8. 820983887 | 1  |
| MSTRG. 24429. 3  | 137  | 0. 30753 | 8. 108215332 | 1  |
| MSTRG. 24429. 4  | 47   | 0. 3256  | 10. 13238525 | 1  |
| MSTRG. 24429. 8  | 77   | 0. 35837 | 8. 752624512 | 1  |
| MSTRG. 24454. 1  | 82   | 0. 39279 | 9. 962585449 | 1  |
| MSTRG. 24456. 2  | 160  | 0. 42083 | 7. 735656738 | 1  |
| MSTRG. 24458. 1  | 65   | 0. 36257 | 6. 523254395 | -1 |
| MSTRG. 24460. 1  | 166  | 0. 35297 | 11. 82952881 | 1  |
| MSTRG. 24460. 2  | 166  | 0. 40716 | 11. 82952881 | 1  |
| MSTRG. 24460. 3  | 153  | 0. 38661 | 11. 65863037 | 1  |
| MSTRG. 24460. 4  | 134  | 0. 3901  | 10. 30853271 | 1  |
| MSTRG. 24460. 5  | 198  | 0. 40068 | 10. 21392822 | 1  |
| MSTRG. 24460. 6  | 134  | 0. 31964 | 10. 20794678 | 1  |
| MSTRG. 24461. 1  | 96   | 0. 35272 | 10. 88665771 | 1  |
| MSTRG. 24462. 1  | 208  | 0. 37519 | 8. 291564941 | 1  |
| MSTRG. 24464. 3  | 661  | 0. 44583 | 9. 227355957 | 1  |
| MSTRG. 24464. 2  | 593  | 0. 44583 | 9. 245666504 | 1  |
| MSTRG. 24464. 1  | 1084 | 0. 45591 | 9. 570983887 | 1  |
| MSTRG. 24465. 1  | 175  | 0. 3307  | 6. 073669434 | 1  |
| MSTRG. 24463. 1  | 796  | 0. 37017 | 9. 256530762 | 1  |
| MSTRG. 24468. 1  | 771  | 0. 36632 | 9. 136047363 | 1  |
| MSTRG. 24468. 2  | 757  | 0. 34056 | 9. 112487793 | 1  |
| MSTRG. 24484. 2  | 229  | 0. 41359 | 6. 858825684 | 1  |
| MSTRG. 24484. 3  | 153  | 0. 41463 | 6. 747131348 | 1  |
| MSTRG. 24484. 4  | 229  | 0. 41359 | 6. 858825684 | 1  |
| MSTRG. 24484. 5  | 229  | 0. 41359 | 6. 858825684 | 1  |
| MSTRG. 24484. 6  | 229  | 0. 42004 | 6. 858825684 | 1  |
| MSTRG. 24484. 7  | 229  | 0. 41359 | 6. 858825684 | 1  |
| MSTRG. 24485. 3  | 75   | 0. 38605 | 12. 08331299 | 1  |
| MSTRG. 24485. 2  | 75   | 0. 43173 | 12. 08331299 | 1  |
| MSTRG. 24486. 1  | 102  | 0. 3857  | 6. 011169434 | 1  |
| MSTRG. 24487. 10 | 2449 | 0. 46111 | 6. 70892334  | 1  |
| MSTRG. 24487. 3  | 2441 | 0. 46111 | 6. 593811035 | 1  |

|                  |      |          |              |    |
|------------------|------|----------|--------------|----|
| MSTRG. 24487. 4  | 2446 | 0. 46111 | 6. 849304199 | 1  |
| MSTRG. 24487. 5  | 2412 | 0. 46111 | 6. 708435059 | 1  |
| MSTRG. 24487. 6  | 2405 | 0. 46111 | 6. 578063965 | 1  |
| MSTRG. 24487. 7  | 2387 | 0. 46111 | 6. 69342041  | 1  |
| MSTRG. 24487. 9  | 2433 | 0. 46111 | 6. 616149902 | 1  |
| MSTRG. 24487. 8  | 2449 | 0. 43894 | 7. 035705566 | 1  |
| MSTRG. 24487. 11 | 1932 | 0. 40458 | 6. 52911377  | 1  |
| MSTRG. 24487. 17 | 2440 | 0. 46111 | 6. 593811035 | 1  |
| MSTRG. 24487. 18 | 2441 | 0. 46111 | 6. 593811035 | 1  |
| MSTRG. 24487. 19 | 2452 | 0. 46111 | 6. 593811035 | 1  |
| MSTRG. 24488. 7  | 268  | 0. 38106 | 5. 085266113 | 1  |
| MSTRG. 24488. 10 | 130  | 0. 35372 | 7. 532165527 | 1  |
| MSTRG. 24488. 8  | 352  | 0. 44615 | 6. 16192627  | 1  |
| MSTRG. 24488. 14 | 54   | 0. 28687 | 5. 425842285 | 1  |
| MSTRG. 24489. 2  | 71   | 0. 32269 | 10. 24700928 | 1  |
| MSTRG. 24472. 3  | 1059 | 0. 45352 | 5. 82635498  | 1  |
| MSTRG. 24472. 5  | 781  | 0. 45578 | 5. 365905762 | 1  |
| MSTRG. 24477. 1  | 811  | 0. 37343 | 9. 025085449 | -1 |
| MSTRG. 24477. 10 | 562  | 0. 38976 | 9. 144104004 | -1 |
| MSTRG. 24477. 8  | 894  | 0. 41665 | 9. 212097168 | -1 |
| MSTRG. 24477. 7  | 724  | 0. 34245 | 8. 897766113 | 1  |
| MSTRG. 24477. 9  | 606  | 0. 30193 | 8. 893859863 | 1  |
| MSTRG. 24478. 1  | 384  | 0. 40818 | 9. 972473145 | 1  |
| MSTRG. 24495. 3  | 642  | 0. 3997  | 5. 428283691 | 1  |
| MSTRG. 24510. 1  | 1267 | 0. 43456 | 5. 758483887 | 1  |
| MSTRG. 24503. 1  | 106  | 0. 37017 | 11. 04071045 | 1  |
| MSTRG. 24504. 1  | 113  | 0. 41094 | 5. 412536621 | -1 |
| MSTRG. 24514. 2  | 89   | 0. 43519 | 5. 512512207 | 1  |
| MSTRG. 24516. 2  | 31   | 0. 42308 | 5. 086242676 | 1  |
| MSTRG. 24521. 6  | 152  | 0. 29689 | 9. 469543457 | 1  |
| MSTRG. 24523. 3  | 734  | 0. 40578 | 9. 086486816 | 1  |
| MSTRG. 24523. 4  | 1122 | 0. 3676  | 9. 094421387 | 1  |
| MSTRG. 24520. 2  | 199  | 0. 36028 | 9. 119934082 | 1  |
| MSTRG. 24520. 3  | 221  | 0. 35914 | 9. 621765137 | 1  |
| MSTRG. 24520. 4  | 199  | 0. 39242 | 9. 119934082 | 1  |
| MSTRG. 24520. 6  | 199  | 0. 35227 | 9. 119934082 | 1  |
| MSTRG. 24528. 4  | 145  | 0. 36997 | 5. 456848145 | 1  |
| MSTRG. 24528. 3  | 111  | 0. 39839 | 6. 027038574 | 1  |
| MSTRG. 24528. 2  | 111  | 0. 37924 | 6. 027038574 | 1  |
| MSTRG. 24528. 5  | 173  | 0. 35526 | 6. 122009277 | 1  |
| MSTRG. 24528. 6  | 94   | 0. 38209 | 11. 82391357 | 1  |
| MSTRG. 24531. 2  | 242  | 0. 33322 | 11. 54669189 | 1  |
| MSTRG. 24539. 3  | 310  | 0. 46195 | 9. 246032715 | 1  |
| MSTRG. 24539. 4  | 332  | 0. 32396 | 9. 215515137 | 1  |
| MSTRG. 24541. 2  | 57   | 0. 39606 | 11. 19024658 | 1  |
| MSTRG. 24543. 1  | 62   | 0. 3387  | 11. 331604   | -1 |
| MSTRG. 24548. 1  | 122  | 0. 33674 | 8. 713806152 | 1  |
| MSTRG. 24548. 3  | 122  | 0. 3443  | 8. 713806152 | 1  |
| MSTRG. 24554. 1  | 1307 | 0. 48448 | 5. 059265137 | 1  |
| MSTRG. 24554. 4  | 157  | 0. 33146 | 9. 096740723 | 1  |
| MSTRG. 24554. 7  | 652  | 0. 44806 | 5. 383239746 | 1  |
| MSTRG. 24554. 9  | 839  | 0. 48603 | 5. 058044434 | 1  |
| MSTRG. 24555. 1  | 42   | 0. 36236 | 9. 396057129 | 1  |
| MSTRG. 24553. 1  | 574  | 0. 37259 | 5. 738464355 | 1  |

|                  |     |          |              |    |
|------------------|-----|----------|--------------|----|
| MSTRG. 24557. 1  | 415 | 0. 34634 | 10. 20379639 | 1  |
| MSTRG. 24557. 3  | 311 | 0. 31045 | 10. 52471924 | 1  |
| MSTRG. 24557. 4  | 432 | 0. 40155 | 9. 805114746 | 1  |
| MSTRG. 24557. 5  | 491 | 0. 42339 | 9. 93182373  | 1  |
| MSTRG. 24566. 2  | 946 | 0. 45741 | 6. 583435059 | 1  |
| MSTRG. 24566. 3  | 791 | 0. 4787  | 6. 059875488 | 1  |
| MSTRG. 24568. 2  | 159 | 0. 36341 | 10. 07879639 | 1  |
| MSTRG. 24571. 1  | 864 | 0. 44062 | 8. 494445801 | 1  |
| MSTRG. 24574. 4  | 85  | 0. 39398 | 10. 7991333  | -1 |
| MSTRG. 24574. 5  | 85  | 0. 43033 | 10. 7991333  | -1 |
| MSTRG. 24574. 3  | 85  | 0. 45328 | 10. 7991333  | -1 |
| MSTRG. 24574. 2  | 123 | 0. 39469 | 10. 03143311 | -1 |
| MSTRG. 24574. 6  | 83  | 0. 3935  | 10. 7991333  | -1 |
| MSTRG. 24575. 1  | 175 | 0. 40762 | 12. 44012451 | 1  |
| MSTRG. 24580. 2  | 104 | 0. 39447 | 6. 014099121 | 1  |
| MSTRG. 24584. 2  | 581 | 0. 37829 | 8. 912902832 | 1  |
| MSTRG. 24584. 3  | 484 | 0. 3618  | 8. 488586426 | 1  |
| MSTRG. 24585. 2  | 202 | 0. 3619  | 10. 07989502 | -1 |
| MSTRG. 24586. 1  | 225 | 0. 46045 | 9. 423400879 | 1  |
| MSTRG. 24588. 3  | 272 | 0. 44088 | 5. 566833496 | 1  |
| MSTRG. 24589. 5  | 441 | 0. 39243 | 8. 188903809 | 1  |
| MSTRG. 24589. 6  | 442 | 0. 37759 | 8. 586364746 | 1  |
| MSTRG. 24589. 4  | 442 | 0. 34118 | 8. 586364746 | 1  |
| MSTRG. 24589. 7  | 428 | 0. 28982 | 8. 584655762 | 1  |
| MSTRG. 24591. 10 | 263 | 0. 35409 | 8. 548156738 | 1  |
| MSTRG. 24591. 3  | 456 | 0. 44269 | 6. 606018066 | -1 |
| MSTRG. 24591. 4  | 267 | 0. 41213 | 7. 071472168 | 1  |
| MSTRG. 24591. 5  | 249 | 0. 3676  | 6. 707824707 | 1  |
| MSTRG. 24591. 6  | 267 | 0. 41705 | 7. 071472168 | 1  |
| MSTRG. 24591. 7  | 249 | 0. 36294 | 6. 707824707 | 1  |
| MSTRG. 24591. 8  | 362 | 0. 41564 | 8. 961364746 | 1  |
| MSTRG. 24591. 9  | 281 | 0. 39762 | 8. 64263916  | 1  |
| MSTRG. 24594. 1  | 113 | 0. 33167 | 6. 472595215 | 1  |
| MSTRG. 24594. 2  | 121 | 0. 34457 | 8. 859558105 | 1  |
| MSTRG. 24595. 3  | 592 | 0. 42539 | 7. 985046387 | 1  |
| MSTRG. 24595. 4  | 423 | 0. 47672 | 8. 813537598 | -1 |
| MSTRG. 24597. 2  | 576 | 0. 32507 | 9. 260314941 | 1  |
| MSTRG. 24599. 3  | 377 | 0. 40377 | 5. 363586426 | 1  |
| MSTRG. 24599. 4  | 503 | 0. 48477 | 5. 376281738 | 1  |
| MSTRG. 24599. 5  | 384 | 0. 43007 | 5. 300231934 | 1  |
| MSTRG. 24604. 2  | 55  | 0. 28948 | 6. 369689941 | 1  |
| MSTRG. 24604. 1  | 571 | 0. 31649 | 9. 152282715 | 1  |
| MSTRG. 24604. 3  | 847 | 0. 31649 | 9. 03338623  | 1  |
| MSTRG. 24602. 1  | 33  | 0. 33483 | 8. 363220215 | -1 |
| MSTRG. 24609. 7  | 733 | 0. 38571 | 4. 577575684 | 1  |
| MSTRG. 24619. 1  | 84  | 0. 38582 | 11. 62957764 | 1  |
| MSTRG. 24620. 2  | 860 | 0. 48804 | 5. 303039551 | 1  |
| MSTRG. 24620. 3  | 764 | 0. 45551 | 5. 544128418 | 1  |
| MSTRG. 24620. 4  | 764 | 0. 45995 | 5. 544128418 | 1  |
| MSTRG. 24620. 5  | 736 | 0. 46988 | 5. 21661377  | 1  |
| MSTRG. 24621. 1  | 259 | 0. 43188 | 7. 703308105 | 1  |
| MSTRG. 24623. 3  | 698 | 0. 3564  | 9. 528991699 | 1  |
| MSTRG. 24625. 4  | 391 | 0. 34628 | 6. 207458496 | 1  |
| MSTRG. 24625. 5  | 391 | 0. 34628 | 6. 207458496 | 1  |

|                 |      |          |              |    |
|-----------------|------|----------|--------------|----|
| MSTRG. 24629. 1 | 416  | 0. 38981 | 6. 901794434 | 1  |
| MSTRG. 24629. 3 | 416  | 0. 39353 | 6. 901794434 | 1  |
| MSTRG. 24630. 1 | 425  | 0. 33624 | 10. 16265869 | 1  |
| MSTRG. 24633. 1 | 114  | 0. 36654 | 9. 500549316 | 1  |
| MSTRG. 24637. 1 | 307  | 0. 32598 | 9. 166442871 | 1  |
| MSTRG. 24637. 3 | 197  | 0. 29542 | 5. 012023926 | 1  |
| MSTRG. 24637. 2 | 215  | 0. 29542 | 5. 136779785 | 1  |
| MSTRG. 24637. 4 | 197  | 0. 29704 | 5. 012023926 | 1  |
| MSTRG. 24640. 2 | 194  | 0. 43875 | 11. 47589111 | 1  |
| MSTRG. 24648. 1 | 108  | 0. 26413 | 9. 620666504 | 1  |
| MSTRG. 24649. 1 | 60   | 0. 30503 | 7. 67755127  | 1  |
| MSTRG. 24651. 1 | 556  | 0. 445   | 7. 891052246 | 1  |
| MSTRG. 24651. 2 | 616  | 0. 46511 | 8. 24005127  | 1  |
| MSTRG. 24642. 6 | 1393 | 0. 36266 | 9. 391662598 | 1  |
| MSTRG. 24642. 7 | 1263 | 0. 37134 | 9. 574035645 | 1  |
| MSTRG. 24644. 1 | 448  | 0. 35582 | 7. 660583496 | 1  |
| MSTRG. 24656. 3 | 452  | 0. 30644 | 8. 035339355 | 1  |
| MSTRG. 24659. 3 | 153  | 0. 36105 | 9. 644958496 | 1  |
| MSTRG. 24659. 4 | 206  | 0. 39595 | 10. 04290771 | 1  |
| MSTRG. 24662. 2 | 989  | 0. 43052 | 6. 490539551 | 1  |
| MSTRG. 24663. 2 | 410  | 0. 33335 | 7. 778625488 | 1  |
| MSTRG. 24664. 2 | 605  | 0. 41721 | 8. 83013916  | 1  |
| MSTRG. 24666. 3 | 198  | 0. 36713 | 9. 195861816 | 1  |
| MSTRG. 24661. 3 | 703  | 0. 46336 | 5. 985656738 | 1  |
| MSTRG. 24661. 4 | 703  | 0. 46336 | 5. 985656738 | 1  |
| MSTRG. 24670. 1 | 47   | 0. 33513 | 11. 54058838 | 1  |
| MSTRG. 24669. 3 | 414  | 0. 45163 | 8. 371276855 | 1  |
| MSTRG. 24669. 6 | 24   | 0. 44259 | 10. 05230713 | 1  |
| MSTRG. 24673. 2 | 1520 | 0. 47739 | 8. 786682129 | 1  |
| MSTRG. 24672. 1 | 140  | 0. 41686 | 6. 09161377  | 1  |
| MSTRG. 24676. 1 | 109  | 0. 42597 | 4. 628356934 | 1  |
| MSTRG. 24676. 2 | 87   | 0. 41263 | 4. 43572998  | 1  |
| MSTRG. 24677. 1 | 37   | 0. 3629  | 9. 102355957 | 1  |
| MSTRG. 24693. 3 | 313  | 0. 46856 | 5. 823181152 | 1  |
| MSTRG. 24696. 1 | 81   | 0. 34975 | 11. 18743896 | 1  |
| MSTRG. 24696. 2 | 250  | 0. 34781 | 8. 057922363 | -1 |
| MSTRG. 24697. 2 | 1118 | 0. 4553  | 6. 97479248  | 1  |
| MSTRG. 24697. 5 | 1091 | 0. 47022 | 6. 829162598 | 1  |
| MSTRG. 24724. 1 | 390  | 0. 46606 | 5. 489074707 | 1  |
| MSTRG. 24724. 6 | 390  | 0. 45232 | 5. 489074707 | 1  |
| MSTRG. 24724. 5 | 390  | 0. 45232 | 5. 489074707 | 1  |
| MSTRG. 24724. 7 | 390  | 0. 46619 | 5. 489074707 | 1  |
| MSTRG. 24724. 2 | 390  | 0. 45935 | 5. 489074707 | 1  |
| MSTRG. 24724. 3 | 390  | 0. 46367 | 5. 489074707 | 1  |
| MSTRG. 24724. 4 | 390  | 0. 48064 | 5. 489074707 | 1  |
| MSTRG. 24725. 1 | 832  | 0. 34832 | 6. 448791504 | 1  |
| MSTRG. 24725. 2 | 832  | 0. 39082 | 6. 448791504 | 1  |
| MSTRG. 24725. 3 | 796  | 0. 37032 | 8. 06829834  | 1  |
| MSTRG. 24725. 4 | 832  | 0. 35196 | 6. 448791504 | 1  |
| MSTRG. 24725. 5 | 832  | 0. 39295 | 6. 448791504 | 1  |
| MSTRG. 24729. 1 | 562  | 0. 47137 | 7. 019714355 | 1  |
| MSTRG. 24729. 2 | 562  | 0. 47451 | 7. 019714355 | 1  |
| MSTRG. 24729. 3 | 294  | 0. 41347 | 9. 258117676 | 1  |
| MSTRG. 24729. 4 | 562  | 0. 48358 | 7. 019714355 | 1  |

|                 |      |          |              |    |
|-----------------|------|----------|--------------|----|
| MSTRG. 24729. 5 | 294  | 0. 39094 | 9. 258117676 | 1  |
| MSTRG. 24729. 6 | 562  | 0. 48147 | 7. 019714355 | 1  |
| MSTRG. 24732. 1 | 369  | 0. 37188 | 4. 854064941 | 1  |
| MSTRG. 24732. 2 | 369  | 0. 39443 | 4. 854064941 | 1  |
| MSTRG. 24732. 4 | 357  | 0. 36654 | 5. 031677246 | 1  |
| MSTRG. 24735. 4 | 702  | 0. 38757 | 9. 453430176 | 1  |
| MSTRG. 24710. 4 | 747  | 0. 35343 | 8. 010437012 | 1  |
| MSTRG. 24710. 5 | 747  | 0. 34723 | 8. 010437012 | 1  |
| MSTRG. 24706. 1 | 177  | 0. 41807 | 5. 174255371 | 1  |
| MSTRG. 24711. 3 | 606  | 0. 42778 | 4. 952453613 | 1  |
| MSTRG. 24711. 4 | 997  | 0. 42613 | 5. 398498535 | 1  |
| MSTRG. 24717. 2 | 141  | 0. 39312 | 8. 904602051 | 1  |
| MSTRG. 24721. 1 | 697  | 0. 33427 | 8. 916564941 | 1  |
| MSTRG. 24721. 2 | 254  | 0. 33962 | 5. 687194824 | 1  |
| MSTRG. 24721. 4 | 254  | 0. 36183 | 5. 687194824 | 1  |
| MSTRG. 24722. 2 | 623  | 0. 46244 | 6. 702819824 | -1 |
| MSTRG. 24722. 4 | 788  | 0. 47559 | 5. 918640137 | 1  |
| MSTRG. 24714. 2 | 179  | 0. 44992 | 4. 919494629 | -1 |
| MSTRG. 24715. 2 | 613  | 0. 44764 | 6. 000671387 | 1  |
| MSTRG. 24741. 2 | 259  | 0. 41993 | 6. 659118652 | 1  |
| MSTRG. 24742. 3 | 171  | 0. 27437 | 9. 567565918 | 1  |
| MSTRG. 24743. 2 | 1762 | 0. 45994 | 5. 581604004 | 1  |
| MSTRG. 24743. 3 | 1761 | 0. 45994 | 5. 581604004 | 1  |
| MSTRG. 24745. 1 | 75   | 0. 35511 | 8. 692199707 | 1  |
| MSTRG. 24745. 2 | 88   | 0. 41454 | 10. 51483154 | 1  |
| MSTRG. 24745. 3 | 71   | 0. 34054 | 7. 608459473 | 1  |
| MSTRG. 24748. 1 | 200  | 0. 44824 | 9. 944274902 | 1  |
| MSTRG. 24763. 1 | 191  | 0. 28338 | 6. 43939209  | 1  |
| MSTRG. 24763. 3 | 195  | 0. 42748 | 7. 623962402 | 1  |
| MSTRG. 24768. 3 | 1106 | 0. 45872 | 5. 77557373  | 1  |
| MSTRG. 24768. 7 | 1106 | 0. 45872 | 5. 77557373  | 1  |
| MSTRG. 24769. 1 | 163  | 0. 3917  | 9. 90802002  | 1  |
| MSTRG. 24772. 2 | 347  | 0. 33259 | 6. 618347168 | 1  |
| MSTRG. 24774. 5 | 720  | 0. 4486  | 5. 49810791  | 1  |
| MSTRG. 24774. 6 | 720  | 0. 4332  | 5. 49810791  | 1  |
| MSTRG. 24784. 2 | 574  | 0. 33557 | 6. 128601074 | 1  |
| MSTRG. 24784. 3 | 110  | 0. 38823 | 8. 966125488 | 1  |
| MSTRG. 24785. 3 | 359  | 0. 44704 | 9. 702697754 | 1  |
| MSTRG. 24788. 1 | 98   | 0. 28567 | 10. 628479   | 1  |
| MSTRG. 24789. 1 | 181  | 0. 30016 | 10. 17987061 | 1  |
| MSTRG. 24792. 2 | 743  | 0. 31878 | 9. 402404785 | 1  |
| MSTRG. 24793. 1 | 28   | 0. 40448 | 11. 8348999  | 1  |
| MSTRG. 24793. 2 | 43   | 0. 38135 | 11. 43890381 | 1  |
| MSTRG. 24778. 1 | 396  | 0. 41864 | 6. 924865723 | 1  |
| MSTRG. 24782. 1 | 972  | 0. 45797 | 4. 850769043 | 1  |
| MSTRG. 24795. 2 | 231  | 0. 44898 | 9. 217224121 | 1  |
| MSTRG. 24801. 1 | 288  | 0. 36937 | 7. 715148926 | 1  |
| MSTRG. 24801. 2 | 288  | 0. 40388 | 7. 715148926 | 1  |
| MSTRG. 24805. 2 | 338  | 0. 43572 | 10. 70111084 | 1  |
| MSTRG. 24807. 1 | 110  | 0. 34686 | 10. 00604248 | 1  |
| MSTRG. 24809. 1 | 867  | 0. 42061 | 5. 38848877  | 1  |
| MSTRG. 24810. 1 | 123  | 0. 29762 | 11. 11541748 | 1  |
| MSTRG. 24814. 1 | 2556 | 0. 46748 | 4. 872497559 | 1  |
| MSTRG. 24815. 2 | 137  | 0. 42652 | 4. 503601074 | 1  |



|                  |      |          |              |    |
|------------------|------|----------|--------------|----|
| MSTRG. 24816. 1  | 148  | 0. 35677 | 5. 155334473 | 1  |
| MSTRG. 24816. 2  | 164  | 0. 37871 | 4. 66619873  | 1  |
| MSTRG. 24817. 1  | 290  | 0. 38515 | 6. 89263916  | 1  |
| MSTRG. 24817. 2  | 170  | 0. 32723 | 7. 872375488 | 1  |
| MSTRG. 24820. 2  | 587  | 0. 46642 | 6. 04486084  | 1  |
| MSTRG. 24821. 1  | 25   | 0. 35649 | 12. 00006104 | 1  |
| MSTRG. 24825. 1  | 67   | 0. 31425 | 10. 20587158 | 1  |
| MSTRG. 24826. 4  | 341  | 0. 45668 | 9. 414855957 | 1  |
| MSTRG. 24826. 6  | 341  | 0. 45873 | 9. 414855957 | 1  |
| MSTRG. 24826. 2  | 370  | 0. 44128 | 8. 644470215 | 1  |
| MSTRG. 24826. 3  | 370  | 0. 46488 | 8. 644470215 | 1  |
| MSTRG. 24826. 5  | 370  | 0. 44128 | 8. 644470215 | 1  |
| MSTRG. 24826. 7  | 341  | 0. 46493 | 9. 414855957 | 1  |
| MSTRG. 24826. 8  | 371  | 0. 3773  | 10. 12042236 | 1  |
| MSTRG. 24827. 6  | 1040 | 0. 41151 | 8. 885559082 | 1  |
| MSTRG. 24827. 7  | 398  | 0. 36733 | 8. 628479004 | 1  |
| MSTRG. 24827. 8  | 461  | 0. 36733 | 8. 972717285 | 1  |
| MSTRG. 24827. 9  | 568  | 0. 36919 | 8. 731994629 | 1  |
| MSTRG. 24827. 10 | 461  | 0. 34683 | 8. 972717285 | 1  |
| MSTRG. 24827. 11 | 421  | 0. 30003 | 9. 59197998  | 1  |
| MSTRG. 24828. 1  | 135  | 0. 32789 | 8. 058532715 | 1  |
| MSTRG. 24830. 1  | 76   | 0. 41647 | 6. 003234863 | 1  |
| MSTRG. 24833. 1  | 116  | 0. 3769  | 11. 4598999  | 1  |
| MSTRG. 24835. 1  | 645  | 0. 35581 | 5. 213195801 | 1  |
| MSTRG. 24836. 1  | 31   | 0. 40274 | 6. 473571777 | 1  |
| MSTRG. 24837. 1  | 796  | 0. 4508  | 5. 614196777 | -1 |
| MSTRG. 24837. 2  | 192  | 0. 34432 | 8. 274719238 | 1  |
| MSTRG. 24837. 3  | 1502 | 0. 42245 | 5. 199768066 | -1 |
| MSTRG. 24837. 4  | 1377 | 0. 43873 | 5. 346618652 | 1  |
| MSTRG. 24837. 5  | 608  | 0. 43873 | 5. 015441895 | -1 |
| MSTRG. 24841. 2  | 1804 | 0. 42431 | 5. 975646973 | 1  |
| MSTRG. 24841. 1  | 1822 | 0. 42431 | 6. 119812012 | 1  |
| MSTRG. 24834. 3  | 130  | 0. 44808 | 9. 773986816 | 1  |
| MSTRG. 24844. 1  | 718  | 0. 44245 | 8. 50970459  | 1  |
| MSTRG. 24844. 2  | 750  | 0. 4304  | 8. 656188965 | 1  |
| MSTRG. 24844. 3  | 750  | 0. 44245 | 8. 656188965 | 1  |
| MSTRG. 24844. 8  | 765  | 0. 40377 | 8. 718688965 | 1  |
| MSTRG. 24844. 9  | 796  | 0. 40377 | 8. 829040527 | 1  |
| MSTRG. 24844. 10 | 713  | 0. 43554 | 8. 016662598 | 1  |
| MSTRG. 24846. 1  | 40   | 0. 28238 | 5. 740783691 | 1  |
| MSTRG. 24847. 1  | 42   | 0. 38642 | 5. 956970215 | 1  |
| MSTRG. 24842. 4  | 239  | 0. 36524 | 8. 863586426 | 1  |
| MSTRG. 24850. 1  | 148  | 0. 27622 | 10. 43084717 | 1  |
| MSTRG. 24849. 3  | 91   | 0. 41129 | 6. 27557373  | 1  |
| MSTRG. 24849. 2  | 2026 | 0. 38592 | 8. 530334473 | 1  |
| MSTRG. 24852. 1  | 109  | 0. 35372 | 7. 06036377  | 1  |
| MSTRG. 24853. 1  | 63   | 0. 31209 | 10. 00701904 | 1  |
| MSTRG. 24854. 1  | 65   | 0. 2921  | 4. 668151855 | 1  |
| MSTRG. 24855. 1  | 95   | 0. 30419 | 9. 623962402 | 1  |
| MSTRG. 24856. 1  | 79   | 0. 36944 | 9. 256286621 | 1  |
| MSTRG. 24858. 2  | 252  | 0. 38309 | 8. 867248535 | 1  |
| MSTRG. 24858. 3  | 252  | 0. 39771 | 8. 867248535 | 1  |
| MSTRG. 24858. 4  | 41   | 0. 34237 | 7. 87701416  | 1  |
| MSTRG. 24860. 3  | 719  | 0. 43493 | 6. 170227051 | 1  |

|                  |      |          |              |    |
|------------------|------|----------|--------------|----|
| MSTRG. 24861. 2  | 757  | 0. 43894 | 5. 844909668 | 1  |
| MSTRG. 24861. 3  | 757  | 0. 44704 | 5. 844909668 | 1  |
| MSTRG. 24861. 4  | 757  | 0. 43894 | 5. 844909668 | 1  |
| MSTRG. 24861. 5  | 757  | 0. 42124 | 5. 844909668 | 1  |
| MSTRG. 24862. 1  | 442  | 0. 45765 | 8. 157653809 | 1  |
| MSTRG. 24866. 1  | 616  | 0. 38372 | 9. 287780762 | 1  |
| MSTRG. 24866. 2  | 647  | 0. 3831  | 9. 396179199 | 1  |
| MSTRG. 24866. 3  | 636  | 0. 37752 | 8. 417785645 | 1  |
| MSTRG. 24866. 7  | 415  | 0. 37665 | 9. 149597168 | 1  |
| MSTRG. 24867. 2  | 164  | 0. 3409  | 11. 23858643 | 1  |
| MSTRG. 24867. 4  | 164  | 0. 31122 | 11. 23858643 | 1  |
| MSTRG. 24867. 3  | 394  | 0. 44432 | 5. 845275879 | 1  |
| MSTRG. 24867. 5  | 402  | 0. 45037 | 5. 925842285 | 1  |
| MSTRG. 24867. 11 | 402  | 0. 43732 | 5. 925842285 | 1  |
| MSTRG. 24867. 7  | 373  | 0. 42926 | 6. 001403809 | 1  |
| MSTRG. 24867. 8  | 402  | 0. 41229 | 5. 925842285 | 1  |
| MSTRG. 24878. 1  | 414  | 0. 46634 | 7. 110168457 | 1  |
| MSTRG. 24879. 2  | 456  | 0. 46751 | 9. 471374512 | 1  |
| MSTRG. 24864. 1  | 1265 | 0. 42487 | 4. 995422363 | 1  |
| MSTRG. 24865. 1  | 87   | 0. 33263 | 9. 506896973 | 1  |
| MSTRG. 24865. 2  | 97   | 0. 39127 | 9. 828430176 | 1  |
| MSTRG. 24869. 2  | 109  | 0. 46006 | 8. 406433105 | 1  |
| MSTRG. 24869. 4  | 89   | 0. 43564 | 5. 969177246 | 1  |
| MSTRG. 24869. 3  | 81   | 0. 43297 | 9. 29473877  | 1  |
| MSTRG. 24871. 2  | 857  | 0. 4258  | 5. 949035645 | 1  |
| MSTRG. 24890. 1  | 317  | 0. 35355 | 7. 16595459  | 1  |
| MSTRG. 24892. 1  | 319  | 0. 38388 | 9. 360900879 | 1  |
| MSTRG. 24892. 3  | 207  | 0. 33891 | 4. 776428223 | 1  |
| MSTRG. 24892. 4  | 75   | 0. 31593 | 6. 537658691 | 1  |
| MSTRG. 24892. 5  | 294  | 0. 35858 | 9. 238952637 | 1  |
| MSTRG. 24892. 6  | 396  | 0. 41864 | 9. 743713379 | 1  |
| MSTRG. 24893. 3  | 506  | 0. 38674 | 6. 074768066 | 1  |
| MSTRG. 24885. 7  | 1966 | 0. 45981 | 8. 741394043 | 1  |
| MSTRG. 24885. 6  | 2123 | 0. 45085 | 8. 799255371 | 1  |
| MSTRG. 24885. 5  | 2902 | 0. 45549 | 5. 868225098 | 1  |
| MSTRG. 24885. 3  | 2960 | 0. 45549 | 5. 797424316 | 1  |
| MSTRG. 24885. 10 | 1158 | 0. 47808 | 9. 61932373  | 1  |
| MSTRG. 24885. 11 | 1840 | 0. 46428 | 8. 606994629 | 1  |
| MSTRG. 24885. 8  | 1956 | 0. 47814 | 8. 717224121 | 1  |
| MSTRG. 24885. 9  | 2839 | 0. 48814 | 6. 007995605 | 1  |
| MSTRG. 24898. 1  | 268  | 0. 38813 | 5. 341247559 | 1  |
| MSTRG. 24898. 2  | 278  | 0. 30981 | 5. 338195801 | 1  |
| MSTRG. 24898. 3  | 270  | 0. 28923 | 5. 955383301 | 1  |
| MSTRG. 24898. 4  | 231  | 0. 31649 | 5. 751525879 | 1  |
| MSTRG. 24898. 5  | 199  | 0. 28584 | 7. 677307129 | 1  |
| MSTRG. 24898. 6  | 162  | 0. 35949 | 7. 05279541  | 1  |
| MSTRG. 24903. 1  | 40   | 0. 31968 | 6. 702697754 | -1 |
| MSTRG. 24913. 2  | 642  | 0. 45073 | 7. 018005371 | 1  |
| MSTRG. 24914. 2  | 72   | 0. 3234  | 11. 83258057 | 1  |
| MSTRG. 24911. 4  | 204  | 0. 42091 | 6. 294616699 | 1  |
| MSTRG. 24920. 1  | 74   | 0. 3205  | 9. 742492676 | 1  |
| MSTRG. 24922. 1  | 64   | 0. 30061 | 6. 054138184 | 1  |
| MSTRG. 24924. 2  | 290  | 0. 41074 | 6. 155822754 | 1  |
| MSTRG. 24925. 1  | 187  | 0. 36085 | 6. 516784668 | 1  |

|                  |      |          |              |    |
|------------------|------|----------|--------------|----|
| MSTRG. 24925. 2  | 187  | 0. 3809  | 6. 516784668 | 1  |
| MSTRG. 24930. 1  | 117  | 0. 36125 | 8. 594909668 | 1  |
| MSTRG. 24932. 1  | 76   | 0. 36637 | 6. 803771973 | 1  |
| MSTRG. 24936. 1  | 415  | 0. 36588 | 9. 766906738 | 1  |
| MSTRG. 24936. 5  | 409  | 0. 35593 | 9. 66998291  | 1  |
| MSTRG. 24936. 4  | 428  | 0. 44502 | 9. 94708252  | 1  |
| MSTRG. 24936. 7  | 371  | 0. 27867 | 10. 04742432 | 1  |
| MSTRG. 24958. 2  | 475  | 0. 45804 | 8. 832214355 | 1  |
| MSTRG. 24958. 1  | 475  | 0. 46369 | 8. 832214355 | 1  |
| MSTRG. 24959. 1  | 554  | 0. 47831 | 5. 862976074 | 1  |
| MSTRG. 24959. 2  | 555  | 0. 47831 | 5. 862976074 | 1  |
| MSTRG. 24960. 1  | 336  | 0. 37654 | 9. 151916504 | 1  |
| MSTRG. 24960. 2  | 243  | 0. 38433 | 6. 642272949 | 1  |
| MSTRG. 24960. 4  | 243  | 0. 38129 | 6. 642272949 | 1  |
| MSTRG. 24960. 5  | 205  | 0. 39328 | 5. 82635498  | 1  |
| MSTRG. 24961. 1  | 46   | 0. 44007 | 6. 218444824 | -1 |
| MSTRG. 24962. 2  | 456  | 0. 482   | 5. 986999512 | 1  |
| MSTRG. 24963. 1  | 115  | 0. 45231 | 6. 804870605 | 1  |
| MSTRG. 24969. 4  | 84   | 0. 37674 | 7. 992492676 | 1  |
| MSTRG. 24971. 1  | 82   | 0. 32164 | 10. 19708252 | 1  |
| MSTRG. 24971. 2  | 82   | 0. 31296 | 10. 19708252 | 1  |
| MSTRG. 24971. 3  | 82   | 0. 33606 | 10. 19708252 | 1  |
| MSTRG. 24971. 4  | 82   | 0. 32546 | 10. 19708252 | 1  |
| MSTRG. 24960. 6  | 474  | 0. 44998 | 4. 797058105 | 1  |
| MSTRG. 24960. 7  | 345  | 0. 43449 | 4. 633361816 | 1  |
| MSTRG. 24944. 2  | 244  | 0. 41429 | 9. 569519043 | 1  |
| MSTRG. 24946. 4  | 643  | 0. 43916 | 5. 60369873  | 1  |
| MSTRG. 24946. 3  | 710  | 0. 44904 | 5. 805480957 | 1  |
| MSTRG. 24946. 5  | 640  | 0. 43916 | 5. 598815918 | 1  |
| MSTRG. 24948. 2  | 139  | 0. 31065 | 6. 707214355 | 1  |
| MSTRG. 24954. 3  | 1081 | 0. 45031 | 5. 547058105 | 1  |
| MSTRG. 24954. 6  | 992  | 0. 45987 | 5. 324890137 | 1  |
| MSTRG. 24976. 3  | 115  | 0. 4307  | 4. 231384277 | 1  |
| MSTRG. 24976. 2  | 931  | 0. 36422 | 7. 530090332 | 1  |
| MSTRG. 24976. 4  | 228  | 0. 36551 | 6. 289733887 | 1  |
| MSTRG. 25009. 1  | 215  | 0. 32175 | 9. 690734863 | 1  |
| MSTRG. 25010. 1  | 683  | 0. 43697 | 6. 169372559 | 1  |
| MSTRG. 25010. 8  | 5006 | 0. 4541  | 6. 203308105 | 1  |
| MSTRG. 25010. 10 | 3251 | 0. 41806 | 6. 403503418 | 1  |
| MSTRG. 25010. 11 | 3339 | 0. 45782 | 6. 364318848 | 1  |
| MSTRG. 25010. 12 | 4403 | 0. 46019 | 6. 178527832 | 1  |
| MSTRG. 25010. 13 | 3258 | 0. 41806 | 6. 384216309 | 1  |
| MSTRG. 25010. 6  | 683  | 0. 40345 | 6. 169372559 | 1  |
| MSTRG. 25010. 4  | 1027 | 0. 45162 | 7. 322937012 | 1  |
| MSTRG. 25010. 7  | 1531 | 0. 46343 | 6. 760192871 | 1  |
| MSTRG. 25010. 3  | 2730 | 0. 46641 | 6. 345397949 | 1  |
| MSTRG. 25010. 5  | 3590 | 0. 45959 | 6. 324768066 | 1  |
| MSTRG. 25012. 1  | 69   | 0. 40621 | 4. 39630127  | 1  |
| MSTRG. 25010. 15 | 930  | 0. 4563  | 6. 666564941 | -1 |
| MSTRG. 25010. 16 | 1171 | 0. 43852 | 6. 803039551 | -1 |
| MSTRG. 24992. 2  | 937  | 0. 44908 | 5. 296447754 | 1  |
| MSTRG. 24993. 1  | 1125 | 0. 44089 | 5. 246643066 | 1  |
| MSTRG. 24993. 3  | 832  | 0. 43785 | 4. 994689941 | 1  |
| MSTRG. 24993. 4  | 1125 | 0. 43846 | 5. 246643066 | 1  |

|                 |      |          |              |    |
|-----------------|------|----------|--------------|----|
| MSTRG. 24993. 5 | 832  | 0. 43846 | 4. 994689941 | 1  |
| MSTRG. 24986. 1 | 445  | 0. 35128 | 9. 863220215 | 1  |
| MSTRG. 24996. 1 | 124  | 0. 35374 | 6. 739074707 | 1  |
| MSTRG. 25001. 2 | 401  | 0. 36921 | 6. 19732666  | 1  |
| MSTRG. 25001. 4 | 457  | 0. 38671 | 5. 896179199 | 1  |
| MSTRG. 25003. 2 | 143  | 0. 3483  | 5. 566101074 | 1  |
| MSTRG. 25006. 1 | 397  | 0. 42963 | 5. 460266113 | 1  |
| MSTRG. 25006. 3 | 61   | 0. 37486 | 4. 01751709  | 1  |
| MSTRG. 25020. 1 | 811  | 0. 40371 | 9. 048278809 | 1  |
| MSTRG. 25020. 4 | 811  | 0. 40371 | 9. 048278809 | 1  |
| MSTRG. 25020. 5 | 171  | 0. 44047 | 9. 421813965 | 1  |
| MSTRG. 25021. 1 | 1862 | 0. 37052 | 6. 994934082 | 1  |
| MSTRG. 25021. 2 | 1895 | 0. 3689  | 6. 725646973 | 1  |
| MSTRG. 25021. 3 | 1823 | 0. 3689  | 6. 88092041  | 1  |
| MSTRG. 25027. 4 | 385  | 0. 30712 | 7. 713928223 | 1  |
| MSTRG. 25027. 7 | 585  | 0. 4724  | 9. 079162598 | 1  |
| MSTRG. 25027. 9 | 578  | 0. 46885 | 7. 216125488 | 1  |
| MSTRG. 25027. 8 | 585  | 0. 47053 | 9. 079162598 | 1  |
| MSTRG. 25028. 2 | 719  | 0. 45302 | 6. 064758301 | 1  |
| MSTRG. 25029. 1 | 68   | 0. 3588  | 10. 37384033 | 1  |
| MSTRG. 25031. 2 | 165  | 0. 36232 | 10. 03997803 | 1  |
| MSTRG. 25031. 3 | 77   | 0. 37252 | 11. 32659912 | 1  |
| MSTRG. 25031. 1 | 80   | 0. 36508 | 8. 099182129 | 1  |
| MSTRG. 25031. 4 | 111  | 0. 36132 | 10. 47296143 | 1  |
| MSTRG. 25033. 2 | 302  | 0. 34164 | 4. 729553223 | 1  |
| MSTRG. 25032. 4 | 138  | 0. 38475 | 5. 532287598 | 1  |
| MSTRG. 25039. 3 | 210  | 0. 4418  | 9. 492004395 | 1  |
| MSTRG. 25041. 2 | 83   | 0. 32346 | 9. 89251709  | 1  |
| MSTRG. 25038. 1 | 35   | 0. 38292 | 7. 880554199 | -1 |
| MSTRG. 25042. 1 | 207  | 0. 41775 | 8. 573791504 | 1  |
| MSTRG. 25045. 3 | 289  | 0. 27274 | 9. 473083496 | 1  |
| MSTRG. 25049. 1 | 90   | 0. 33409 | 10. 29205322 | 1  |
| MSTRG. 25050. 2 | 1446 | 0. 45232 | 6. 06427002  | -1 |
| MSTRG. 25050. 4 | 1412 | 0. 45067 | 5. 992736816 | -1 |
| MSTRG. 25050. 5 | 1375 | 0. 44505 | 6. 257507324 | -1 |
| MSTRG. 25051. 3 | 166  | 0. 4291  | 6. 613220215 | 1  |
| MSTRG. 25051. 4 | 163  | 0. 4537  | 6. 428771973 | -1 |
| MSTRG. 25051. 6 | 99   | 0. 40736 | 7. 92779541  | -1 |
| MSTRG. 25053. 6 | 707  | 0. 46802 | 6. 481506348 | 1  |
| MSTRG. 25058. 1 | 660  | 0. 37269 | 7. 050964355 | 1  |
| MSTRG. 25058. 3 | 426  | 0. 3592  | 8. 009460449 | 1  |
| MSTRG. 25059. 1 | 1118 | 0. 4724  | 5. 727722168 | 1  |
| MSTRG. 25055. 1 | 83   | 0. 40935 | 10. 26495361 | 1  |
| MSTRG. 25056. 1 | 640  | 0. 39724 | 6. 07623291  | 1  |
| MSTRG. 25060. 3 | 277  | 0. 37985 | 10. 94561768 | 1  |
| MSTRG. 25063. 2 | 136  | 0. 35259 | 11. 26934814 | 1  |
| MSTRG. 25063. 1 | 136  | 0. 35226 | 11. 26934814 | 1  |
| MSTRG. 25064. 2 | 208  | 0. 3987  | 6. 242248535 | 1  |
| MSTRG. 25067. 2 | 152  | 0. 33265 | 9. 526794434 | 1  |
| MSTRG. 25067. 3 | 213  | 0. 31203 | 8. 04473877  | 1  |
| MSTRG. 25070. 1 | 150  | 0. 35501 | 10. 29266357 | 1  |
| MSTRG. 25070. 2 | 150  | 0. 36888 | 10. 29266357 | 1  |
| MSTRG. 25070. 4 | 150  | 0. 3726  | 10. 29266357 | 1  |
| MSTRG. 25072. 4 | 308  | 0. 41083 | 6. 198669434 | 1  |

|                 |      |          |              |    |
|-----------------|------|----------|--------------|----|
| MSTRG. 25072. 3 | 427  | 0. 4647  | 7. 582092285 | 1  |
| MSTRG. 25074. 2 | 994  | 0. 41128 | 5. 94317627  | 1  |
| MSTRG. 25074. 3 | 984  | 0. 38356 | 5. 905578613 | 1  |
| MSTRG. 25071. 3 | 180  | 0. 40109 | 7. 007629395 | 1  |
| MSTRG. 25078. 3 | 712  | 0. 42109 | 5. 422668457 | 1  |
| MSTRG. 25079. 3 | 146  | 0. 44074 | 10. 10150146 | 1  |
| MSTRG. 25079. 2 | 146  | 0. 45067 | 10. 10150146 | 1  |
| MSTRG. 25078. 4 | 712  | 0. 46748 | 5. 422668457 | 1  |
| MSTRG. 25080. 2 | 659  | 0. 46312 | 5. 603820801 | 1  |
| MSTRG. 25076. 2 | 114  | 0. 33744 | 12. 2699585  | 1  |
| MSTRG. 25076. 3 | 95   | 0. 3568  | 9. 503723145 | 1  |
| MSTRG. 25085. 2 | 146  | 0. 33767 | 4. 932189941 | 1  |
| MSTRG. 25085. 3 | 247  | 0. 41122 | 5. 499206543 | 1  |
| MSTRG. 25081. 1 | 599  | 0. 42266 | 8. 122375488 | 1  |
| MSTRG. 25090. 3 | 140  | 0. 44512 | 5. 929626465 | 1  |
| MSTRG. 25108. 4 | 220  | 0. 40474 | 10. 0479126  | 1  |
| MSTRG. 25108. 7 | 220  | 0. 31047 | 10. 0479126  | 1  |
| MSTRG. 25109. 1 | 169  | 0. 40865 | 8. 512390137 | -1 |
| MSTRG. 25110. 1 | 596  | 0. 46954 | 9. 093688965 | 1  |
| MSTRG. 25103. 2 | 616  | 0. 45839 | 4. 848571777 | 1  |
| MSTRG. 25103. 3 | 616  | 0. 47963 | 4. 848571777 | 1  |
| MSTRG. 25103. 5 | 575  | 0. 46118 | 4. 874450684 | 1  |
| MSTRG. 25103. 4 | 575  | 0. 48454 | 4. 874450684 | 1  |
| MSTRG. 25103. 6 | 173  | 0. 44939 | 4. 551086426 | 1  |
| MSTRG. 25105. 1 | 70   | 0. 44465 | 10. 09820557 | 1  |
| MSTRG. 25104. 1 | 20   | 0. 36789 | 6. 501525879 | 1  |
| MSTRG. 25107. 1 | 29   | 0. 37066 | 4. 55657959  | 1  |
| MSTRG. 25116. 1 | 347  | 0. 44243 | 4. 955627441 | 1  |
| MSTRG. 25116. 3 | 347  | 0. 45161 | 4. 955627441 | 1  |
| MSTRG. 25115. 1 | 60   | 0. 33376 | 6. 010314941 | 1  |
| MSTRG. 25118. 2 | 156  | 0. 27385 | 8. 305725098 | 1  |
| MSTRG. 25120. 1 | 334  | 0. 41167 | 5. 231872559 | 1  |
| MSTRG. 25123. 1 | 132  | 0. 3458  | 11. 59124756 | -1 |
| MSTRG. 25124. 1 | 504  | 0. 41151 | 9. 436828613 | 1  |
| MSTRG. 25124. 2 | 307  | 0. 45847 | 5. 804016113 | 1  |
| MSTRG. 25125. 1 | 65   | 0. 32634 | 11. 43536377 | 1  |
| MSTRG. 25143. 1 | 191  | 0. 31454 | 9. 171325684 | 1  |
| MSTRG. 25143. 2 | 191  | 0. 31    | 9. 171325684 | 1  |
| MSTRG. 25143. 3 | 191  | 0. 31454 | 9. 171325684 | 1  |
| MSTRG. 25128. 1 | 61   | 0. 2972  | 3. 972106934 | 1  |
| MSTRG. 25138. 1 | 48   | 0. 37362 | 11. 71258545 | 1  |
| MSTRG. 25139. 1 | 73   | 0. 48158 | 5. 840026855 | 1  |
| MSTRG. 25150. 4 | 265  | 0. 45532 | 6. 100646973 | 1  |
| MSTRG. 25166. 1 | 77   | 0. 34218 | 7. 774963379 | 1  |
| MSTRG. 25167. 1 | 1625 | 0. 46229 | 8. 773742676 | 1  |
| MSTRG. 25167. 3 | 713  | 0. 41207 | 6. 833557129 | 1  |
| MSTRG. 25168. 1 | 988  | 0. 27911 | 6. 69720459  | 1  |
| MSTRG. 25164. 2 | 240  | 0. 42518 | 9. 975646973 | 1  |
| MSTRG. 25164. 1 | 264  | 0. 42009 | 10. 13067627 | 1  |
| MSTRG. 25164. 4 | 234  | 0. 46834 | 10. 07452393 | 1  |
| MSTRG. 25170. 1 | 144  | 0. 29637 | 11. 03302002 | 1  |
| MSTRG. 25174. 2 | 286  | 0. 41653 | 10. 26239014 | 1  |
| MSTRG. 25174. 3 | 183  | 0. 37868 | 9. 126403809 | 1  |
| MSTRG. 25176. 4 | 186  | 0. 34111 | 9. 012145996 | 1  |

|                 |      |          |              |    |
|-----------------|------|----------|--------------|----|
| MSTRG. 25176. 5 | 186  | 0. 37141 | 9. 012145996 | 1  |
| MSTRG. 25181. 1 | 311  | 0. 36499 | 7. 558654785 | -1 |
| MSTRG. 25185. 1 | 159  | 0. 38903 | 10. 6104126  | 1  |
| MSTRG. 25195. 1 | 362  | 0. 30838 | 9. 070495605 | 1  |
| MSTRG. 25195. 2 | 362  | 0. 3632  | 9. 070495605 | 1  |
| MSTRG. 25196. 3 | 586  | 0. 45454 | 7. 632751465 | 1  |
| MSTRG. 25196. 4 | 752  | 0. 45551 | 7. 344543457 | 1  |
| MSTRG. 25196. 5 | 339  | 0. 47164 | 6. 808532715 | 1  |
| MSTRG. 25196. 6 | 230  | 0. 47477 | 9. 077087402 | 1  |
| MSTRG. 25198. 1 | 33   | 0. 46224 | 6. 518981934 | -1 |
| MSTRG. 25190. 3 | 674  | 0. 41362 | 6. 612854004 | 1  |
| MSTRG. 25205. 4 | 1701 | 0. 36842 | 7. 29888916  | 1  |
| MSTRG. 25205. 5 | 1786 | 0. 41692 | 7. 796813965 | 1  |
| MSTRG. 25206. 1 | 107  | 0. 34162 | 10. 12615967 | 1  |
| MSTRG. 25205. 6 | 306  | 0. 38786 | 7. 138366699 | 1  |
| MSTRG. 25207. 1 | 76   | 0. 30289 | 5. 420593262 | 1  |
| MSTRG. 25207. 2 | 142  | 0. 27651 | 9. 296081543 | 1  |
| MSTRG. 25207. 3 | 142  | 0. 28588 | 9. 296081543 | 1  |
| MSTRG. 25207. 4 | 97   | 0. 2908  | 10. 93048096 | 1  |
| MSTRG. 25208. 1 | 2    | 0. 50083 | 4. 596496582 | -1 |
| MSTRG. 25211. 1 | 69   | 0. 28683 | 8. 815734863 | 1  |
| MSTRG. 25214. 1 | 90   | 0. 37557 | 11. 4944458  | 1  |
| MSTRG. 25214. 2 | 72   | 0. 35182 | 4. 507141113 | 1  |
| MSTRG. 25217. 1 | 371  | 0. 44441 | 5. 903747559 | 1  |
| MSTRG. 25232. 1 | 79   | 0. 35885 | 10. 29205322 | -1 |
| MSTRG. 25248. 1 | 89   | 0. 29367 | 9. 338806152 | 1  |
| MSTRG. 25254. 2 | 603  | 0. 48387 | 5. 551818848 | 1  |
| MSTRG. 25221. 1 | 22   | 0. 32646 | 12. 30267334 | -1 |
| MSTRG. 25224. 3 | 74   | 0. 46622 | 5. 719665527 | -1 |
| MSTRG. 25226. 1 | 208  | 0. 2785  | 6. 07598877  | 1  |
| MSTRG. 25226. 3 | 130  | 0. 27251 | 10. 23956299 | 1  |
| MSTRG. 25226. 5 | 134  | 0. 27327 | 8. 464782715 | 1  |
| MSTRG. 25226. 4 | 111  | 0. 29443 | 6. 532409668 | 1  |
| MSTRG. 25226. 8 | 134  | 0. 27385 | 8. 464782715 | 1  |
| MSTRG. 25255. 4 | 626  | 0. 43152 | 5. 516052246 | 1  |
| MSTRG. 25255. 1 | 576  | 0. 36757 | 5. 512512207 | 1  |
| MSTRG. 25256. 1 | 100  | 0. 35732 | 9. 81817627  | 1  |
| MSTRG. 25257. 1 | 161  | 0. 26101 | 10. 79302979 | 1  |
| MSTRG. 25258. 1 | 87   | 0. 32469 | 7. 065368652 | 1  |
| MSTRG. 25255. 6 | 143  | 0. 39192 | 5. 136047363 | 1  |
| MSTRG. 25268. 6 | 510  | 0. 31264 | 6. 738220215 | 1  |
| MSTRG. 25269. 1 | 48   | 0. 30014 | 10. 17108154 | 1  |
| MSTRG. 25280. 2 | 153  | 0. 48401 | 6. 170837402 | 1  |
| MSTRG. 25261. 1 | 286  | 0. 3208  | 9. 052307129 | 1  |
| MSTRG. 25262. 1 | 49   | 0. 34027 | 7. 877258301 | 1  |
| MSTRG. 25262. 2 | 70   | 0. 31027 | 5. 769348145 | 1  |
| MSTRG. 25265. 1 | 39   | 0. 44768 | 6. 199157715 | -1 |
| MSTRG. 25281. 1 | 45   | 0. 41853 | 10. 06292725 | 1  |
| MSTRG. 25285. 2 | 108  | 0. 43425 | 11. 04962158 | 1  |
| MSTRG. 25290. 3 | 639  | 0. 43405 | 4. 770080566 | 1  |
| MSTRG. 25297. 2 | 142  | 0. 38291 | 8. 624450684 | 1  |
| MSTRG. 25298. 1 | 110  | 0. 3351  | 10. 65802002 | 1  |
| MSTRG. 25302. 1 | 112  | 0. 47184 | 5. 726501465 | -1 |
| MSTRG. 25310. 1 | 134  | 0. 30649 | 9. 707458496 | 1  |

|                 |      |          |              |    |
|-----------------|------|----------|--------------|----|
| MSTRG. 25318. 1 | 488  | 0. 37649 | 4. 472106934 | 1  |
| MSTRG. 25315. 1 | 83   | 0. 34675 | 4. 715026855 | 1  |
| MSTRG. 25327. 1 | 1703 | 0. 43909 | 5. 604553223 | 1  |
| MSTRG. 25327. 2 | 1703 | 0. 4338  | 5. 604553223 | 1  |
| MSTRG. 25327. 3 | 1699 | 0. 43909 | 5. 542541504 | 1  |
| MSTRG. 25328. 1 | 122  | 0. 34048 | 11. 27008057 | -1 |
| MSTRG. 25329. 1 | 69   | 0. 3345  | 10. 24713135 | 1  |
| MSTRG. 25335. 1 | 811  | 0. 45382 | 6. 610290527 | 1  |
| MSTRG. 25335. 2 | 187  | 0. 42446 | 9. 053771973 | 1  |
| MSTRG. 25342. 1 | 716  | 0. 38518 | 4. 922790527 | 1  |
| MSTRG. 25342. 4 | 716  | 0. 49863 | 4. 922790527 | 1  |
| MSTRG. 25342. 5 | 716  | 0. 47604 | 4. 922790527 | 1  |
| MSTRG. 25343. 1 | 45   | 0. 29403 | 9. 58001709  | 1  |
| MSTRG. 25348. 2 | 2463 | 0. 45493 | 4. 716003418 | 1  |
| MSTRG. 25350. 2 | 220  | 0. 38649 | 9. 296936035 | 1  |
| MSTRG. 25351. 2 | 2495 | 0. 42996 | 4. 811828613 | 1  |
| MSTRG. 25351. 3 | 2499 | 0. 42996 | 4. 823547363 | 1  |
| MSTRG. 25351. 4 | 2390 | 0. 42996 | 4. 861877441 | 1  |
| MSTRG. 25356. 2 | 48   | 0. 38503 | 10. 34588623 | 1  |
| MSTRG. 25359. 1 | 398  | 0. 48956 | 6. 23248291  | 1  |
| MSTRG. 25359. 4 | 405  | 0. 37539 | 6. 359924316 | 1  |
| MSTRG. 25353. 1 | 215  | 0. 43474 | 5. 461120605 | 1  |
| MSTRG. 25353. 3 | 215  | 0. 41873 | 5. 461120605 | 1  |
| MSTRG. 25354. 1 | 13   | 0. 40706 | 5. 823059082 | 1  |
| MSTRG. 25354. 2 | 21   | 0. 46366 | 9. 69708252  | 1  |
| MSTRG. 25361. 1 | 264  | 0. 28851 | 8. 435974121 | 1  |
| MSTRG. 25361. 3 | 139  | 0. 39569 | 11. 48175049 | 1  |
| MSTRG. 25364. 1 | 78   | 0. 33387 | 7. 674987793 | 1  |
| MSTRG. 25362. 2 | 319  | 0. 44631 | 6. 010437012 | 1  |
| MSTRG. 25372. 1 | 91   | 0. 39353 | 9. 032897949 | 1  |
| MSTRG. 25384. 1 | 195  | 0. 38914 | 5. 041564941 | 1  |
| MSTRG. 25384. 2 | 311  | 0. 4382  | 5. 104431152 | 1  |
| MSTRG. 25384. 3 | 516  | 0. 36082 | 10. 35321045 | 1  |
| MSTRG. 25384. 6 | 110  | 0. 32057 | 9. 828552246 | 1  |
| MSTRG. 25388. 1 | 1412 | 0. 45517 | 5. 403259277 | 1  |
| MSTRG. 25388. 5 | 1412 | 0. 48982 | 5. 403259277 | 1  |
| MSTRG. 25388. 6 | 1372 | 0. 46355 | 5. 430236816 | 1  |
| MSTRG. 25388. 7 | 404  | 0. 44279 | 4. 717956543 | 1  |
| MSTRG. 25389. 1 | 123  | 0. 33438 | 8. 80255127  | 1  |
| MSTRG. 25390. 1 | 149  | 0. 3     | 7. 75189209  | 1  |
| MSTRG. 25389. 2 | 110  | 0. 27886 | 6. 558654785 | 1  |
| MSTRG. 25389. 3 | 94   | 0. 35728 | 8. 885925293 | 1  |
| MSTRG. 25409. 4 | 381  | 0. 38223 | 6. 019836426 | 1  |
| MSTRG. 25409. 5 | 344  | 0. 40694 | 5. 222473145 | 1  |
| MSTRG. 25409. 7 | 81   | 0. 39027 | 4. 749938965 | 1  |
| MSTRG. 25410. 2 | 285  | 0. 39334 | 6. 156188965 | 1  |
| MSTRG. 25413. 2 | 473  | 0. 42994 | 8. 723815918 | 1  |
| MSTRG. 25413. 3 | 473  | 0. 48362 | 8. 723815918 | 1  |
| MSTRG. 25413. 4 | 473  | 0. 4577  | 8. 723815918 | 1  |
| MSTRG. 25413. 5 | 473  | 0. 48362 | 8. 723815918 | 1  |
| MSTRG. 25413. 6 | 168  | 0. 39846 | 7. 09576416  | 1  |
| MSTRG. 25413. 7 | 534  | 0. 47147 | 6. 380065918 | -1 |
| MSTRG. 25415. 1 | 488  | 0. 34431 | 5. 584289551 | 1  |
| MSTRG. 25415. 2 | 973  | 0. 34162 | 6. 503967285 | 1  |

|                  |      |          |              |    |
|------------------|------|----------|--------------|----|
| MSTRG. 25415. 3  | 53   | 0. 25609 | 9. 698425293 | 1  |
| MSTRG. 25415. 4  | 468  | 0. 34547 | 6. 481384277 | 1  |
| MSTRG. 25417. 1  | 44   | 0. 29059 | 8. 802429199 | 1  |
| MSTRG. 25399. 1  | 158  | 0. 3854  | 8. 979064941 | 1  |
| MSTRG. 25391. 1  | 79   | 0. 42851 | 10. 16094971 | -1 |
| MSTRG. 25405. 2  | 580  | 0. 39265 | 9. 062194824 | 1  |
| MSTRG. 25406. 1  | 75   | 0. 31209 | 8. 295593262 | -1 |
| MSTRG. 25405. 3  | 122  | 0. 40695 | 8. 80291748  | 1  |
| MSTRG. 25433. 2  | 94   | 0. 41169 | 4. 428649902 | 1  |
| MSTRG. 25434. 1  | 56   | 0. 27517 | 4. 77166748  | 1  |
| MSTRG. 25435. 3  | 285  | 0. 46058 | 9. 658752441 | 1  |
| MSTRG. 25436. 1  | 706  | 0. 4257  | 6. 278503418 | 1  |
| MSTRG. 25436. 2  | 706  | 0. 35909 | 6. 278503418 | 1  |
| MSTRG. 25436. 5  | 706  | 0. 41888 | 6. 278503418 | 1  |
| MSTRG. 25437. 1  | 44   | 0. 3882  | 10. 90325928 | 1  |
| MSTRG. 25441. 2  | 225  | 0. 44345 | 4. 808166504 | 1  |
| MSTRG. 25447. 2  | 782  | 0. 3823  | 6. 035583496 | 1  |
| MSTRG. 25447. 6  | 782  | 0. 3823  | 6. 035583496 | 1  |
| MSTRG. 25447. 7  | 782  | 0. 45852 | 6. 035583496 | 1  |
| MSTRG. 25448. 1  | 125  | 0. 27937 | 10. 13580322 | 1  |
| MSTRG. 25444. 1  | 284  | 0. 35487 | 11. 77044678 | 1  |
| MSTRG. 25451. 4  | 304  | 0. 46333 | 7. 945373535 | 1  |
| MSTRG. 25462. 1  | 89   | 0. 39716 | 10. 57415771 | 1  |
| MSTRG. 25463. 1  | 306  | 0. 30492 | 7. 785339355 | 1  |
| MSTRG. 25465. 1  | 95   | 0. 32465 | 9. 911437988 | 1  |
| MSTRG. 25472. 5  | 302  | 0. 32304 | 5. 332092285 | 1  |
| MSTRG. 25472. 6  | 473  | 0. 43867 | 6. 426818848 | 1  |
| MSTRG. 25472. 7  | 473  | 0. 43427 | 6. 426818848 | 1  |
| MSTRG. 25472. 8  | 473  | 0. 42413 | 6. 426818848 | 1  |
| MSTRG. 25477. 1  | 523  | 0. 39563 | 4. 520202637 | 1  |
| MSTRG. 25477. 2  | 523  | 0. 38518 | 4. 520202637 | 1  |
| MSTRG. 25478. 1  | 90   | 0. 28366 | 4. 369812012 | 1  |
| MSTRG. 25478. 3  | 90   | 0. 42894 | 4. 369812012 | 1  |
| MSTRG. 25478. 5  | 281  | 0. 44567 | 5. 989196777 | 1  |
| MSTRG. 25480. 3  | 1443 | 0. 34952 | 7. 624206543 | 1  |
| MSTRG. 25480. 4  | 1345 | 0. 4184  | 8. 036315918 | 1  |
| MSTRG. 25483. 1  | 43   | 0. 36592 | 9. 520935059 | 1  |
| MSTRG. 25483. 2  | 56   | 0. 37532 | 9. 296813965 | 1  |
| MSTRG. 25484. 2  | 269  | 0. 42287 | 8. 734680176 | 1  |
| MSTRG. 25489. 2  | 546  | 0. 39923 | 7. 140075684 | 1  |
| MSTRG. 25489. 3  | 546  | 0. 42643 | 7. 140075684 | 1  |
| MSTRG. 25491. 1  | 311  | 0. 29332 | 9. 03692627  | 1  |
| MSTRG. 25492. 4  | 222  | 0. 28195 | 8. 918884277 | 1  |
| MSTRG. 25492. 3  | 216  | 0. 35524 | 9. 111022949 | 1  |
| MSTRG. 25492. 5  | 215  | 0. 35524 | 9. 111022949 | 1  |
| MSTRG. 25499. 3  | 212  | 0. 3333  | 12. 0269165  | 1  |
| MSTRG. 25499. 2  | 253  | 0. 35864 | 8. 541931152 | 1  |
| MSTRG. 25499. 6  | 212  | 0. 33686 | 12. 0269165  | 1  |
| MSTRG. 25499. 7  | 101  | 0. 29583 | 11. 57684326 | 1  |
| MSTRG. 25499. 8  | 212  | 0. 36178 | 12. 0269165  | 1  |
| MSTRG. 25499. 10 | 172  | 0. 36168 | 8. 438537598 | 1  |
| MSTRG. 25508. 1  | 55   | 0. 34779 | 10. 40594482 | 1  |
| MSTRG. 25508. 3  | 272  | 0. 29772 | 8. 007385254 | 1  |
| MSTRG. 25508. 4  | 169  | 0. 28334 | 6. 413391113 | 1  |



|                  |      |          |              |    |
|------------------|------|----------|--------------|----|
| MSTRG. 25508. 5  | 182  | 0. 32236 | 5. 216369629 | 1  |
| MSTRG. 25508. 6  | 272  | 0. 29772 | 8. 007385254 | 1  |
| MSTRG. 25508. 7  | 127  | 0. 33475 | 7. 101135254 | 1  |
| MSTRG. 25509. 1  | 175  | 0. 32485 | 4. 959289551 | 1  |
| MSTRG. 25508. 9  | 155  | 0. 2921  | 8. 761901855 | 1  |
| MSTRG. 25508. 8  | 144  | 0. 30596 | 7. 700622559 | 1  |
| MSTRG. 25510. 1  | 38   | 0. 38225 | 6. 680236816 | -1 |
| MSTRG. 25508. 10 | 155  | 0. 28982 | 8. 761901855 | 1  |
| MSTRG. 25508. 11 | 132  | 0. 28982 | 10. 2020874  | 1  |
| MSTRG. 25508. 12 | 90   | 0. 28982 | 9. 58770752  | 1  |
| MSTRG. 25508. 13 | 53   | 0. 28686 | 8. 682556152 | 1  |
| MSTRG. 25511. 1  | 48   | 0. 32389 | 9. 744934082 | 1  |
| MSTRG. 25512. 1  | 122  | 0. 28982 | 9. 552062988 | 1  |
| MSTRG. 25512. 2  | 131  | 0. 28971 | 9. 753967285 | 1  |
| MSTRG. 25513. 1  | 107  | 0. 31742 | 6. 155456543 | 1  |
| MSTRG. 25514. 1  | 125  | 0. 2765  | 10. 88555908 | 1  |
| MSTRG. 25508. 14 | 74   | 0. 3708  | 8. 768981934 | -1 |
| MSTRG. 25517. 1  | 96   | 0. 34973 | 5. 11895752  | 1  |
| MSTRG. 25517. 3  | 96   | 0. 34876 | 5. 11895752  | 1  |
| MSTRG. 25517. 4  | 96   | 0. 35312 | 5. 11895752  | 1  |
| MSTRG. 25518. 2  | 1179 | 0. 46832 | 5. 66595459  | 1  |
| MSTRG. 25528. 2  | 607  | 0. 2921  | 9. 574401855 | 1  |
| MSTRG. 25528. 3  | 862  | 0. 4248  | 8. 47833252  | 1  |
| MSTRG. 25529. 1  | 67   | 0. 27517 | 8. 934631348 | 1  |
| MSTRG. 25528. 4  | 121  | 0. 30596 | 8. 77130127  | 1  |
| MSTRG. 25530. 1  | 154  | 0. 27661 | 8. 530822754 | 1  |
| MSTRG. 25531. 1  | 63   | 0. 30268 | 8. 710510254 | 1  |
| MSTRG. 25532. 1  | 94   | 0. 33419 | 9. 740661621 | 1  |
| MSTRG. 25537. 2  | 416  | 0. 3439  | 6. 800720215 | 1  |
| MSTRG. 25537. 1  | 389  | 0. 3208  | 6. 382629395 | 1  |
| MSTRG. 25537. 3  | 390  | 0. 3208  | 6. 382629395 | 1  |
| MSTRG. 25540. 1  | 531  | 0. 44095 | 9. 070129395 | 1  |
| MSTRG. 25546. 1  | 157  | 0. 38517 | 10. 93707275 | -1 |
| MSTRG. 25550. 3  | 487  | 0. 42475 | 4. 645690918 | 1  |
| MSTRG. 25552. 1  | 520  | 0. 38098 | 5. 438049316 | 1  |
| MSTRG. 25552. 2  | 547  | 0. 40369 | 5. 299865723 | 1  |
| MSTRG. 25552. 3  | 553  | 0. 38098 | 5. 311828613 | 1  |
| MSTRG. 25552. 4  | 547  | 0. 37308 | 5. 299865723 | 1  |
| MSTRG. 25552. 5  | 547  | 0. 39948 | 5. 299865723 | 1  |
| MSTRG. 25552. 6  | 520  | 0. 42317 | 5. 438049316 | 1  |
| MSTRG. 25552. 7  | 520  | 0. 40353 | 5. 438049316 | 1  |
| MSTRG. 25552. 9  | 520  | 0. 38922 | 5. 438049316 | 1  |
| MSTRG. 25552. 10 | 520  | 0. 40369 | 5. 438049316 | 1  |
| MSTRG. 25556. 3  | 100  | 0. 28518 | 4. 385437012 | 1  |
| MSTRG. 25557. 2  | 344  | 0. 39023 | 5. 390441895 | 1  |
| MSTRG. 25571. 1  | 387  | 0. 44347 | 5. 971374512 | 1  |
| MSTRG. 25577. 7  | 1556 | 0. 47668 | 6. 094299316 | 1  |
| MSTRG. 25577. 8  | 1540 | 0. 47668 | 6. 094055176 | 1  |
| MSTRG. 25582. 3  | 439  | 0. 47298 | 5. 86505127  | -1 |
| MSTRG. 25593. 2  | 550  | 0. 40812 | 5. 772399902 | 1  |
| MSTRG. 25594. 1  | 33   | 0. 28784 | 8. 253112793 | 1  |
| MSTRG. 25595. 1  | 1708 | 0. 42735 | 7. 131286621 | 1  |
| MSTRG. 25601. 2  | 613  | 0. 31852 | 4. 786193848 | 1  |
| MSTRG. 25597. 2  | 648  | 0. 33603 | 7. 206848145 | 1  |

|                  |      |          |              |    |
|------------------|------|----------|--------------|----|
| MSTRG. 25597. 3  | 96   | 0. 31369 | 10. 89093018 | 1  |
| MSTRG. 25598. 2  | 36   | 0. 35209 | 8. 940490723 | 1  |
| MSTRG. 25598. 1  | 36   | 0. 38067 | 8. 940490723 | 1  |
| MSTRG. 25599. 1  | 142  | 0. 28306 | 6. 797058105 | 1  |
| MSTRG. 25597. 4  | 179  | 0. 28584 | 8. 288879395 | 1  |
| MSTRG. 25602. 1  | 717  | 0. 33747 | 6. 397521973 | -1 |
| MSTRG. 25602. 2  | 660  | 0. 47803 | 5. 898010254 | -1 |
| MSTRG. 25602. 4  | 151  | 0. 29607 | 9. 368347168 | 1  |
| MSTRG. 25602. 5  | 85   | 0. 41021 | 4. 875671387 | 1  |
| MSTRG. 25604. 3  | 790  | 0. 44923 | 5. 672424316 | 1  |
| MSTRG. 25604. 2  | 880  | 0. 36117 | 5. 77130127  | 1  |
| MSTRG. 25615. 2  | 1946 | 0. 39342 | 6. 40020752  | 1  |
| MSTRG. 25615. 6  | 3231 | 0. 49099 | 6. 141784668 | 1  |
| MSTRG. 25615. 7  | 3230 | 0. 48847 | 6. 157165527 | 1  |
| MSTRG. 25615. 9  | 2864 | 0. 4875  | 6. 198303223 | 1  |
| MSTRG. 25615. 10 | 1295 | 0. 48598 | 6. 307312012 | 1  |
| MSTRG. 25607. 5  | 2370 | 0. 48063 | 8. 023620605 | 1  |
| MSTRG. 25608. 1  | 60   | 0. 26981 | 8. 711364746 | 1  |
| MSTRG. 25609. 1  | 110  | 0. 30656 | 11. 58636475 | 1  |
| MSTRG. 25610. 1  | 138  | 0. 34496 | 10. 7276001  | 1  |
| MSTRG. 25610. 2  | 190  | 0. 31852 | 9. 232849121 | 1  |
| MSTRG. 25611. 1  | 55   | 0. 27075 | 8. 841125488 | 1  |
| MSTRG. 25614. 1  | 71   | 0. 41286 | 5. 090148926 | 1  |
| MSTRG. 25616. 2  | 279  | 0. 36818 | 5. 844909668 | 1  |
| MSTRG. 25616. 3  | 69   | 0. 28499 | 9. 29888916  | 1  |
| MSTRG. 25620. 2  | 695  | 0. 35258 | 7. 541320801 | 1  |
| MSTRG. 25626. 1  | 74   | 0. 33607 | 4. 889221191 | 1  |
| MSTRG. 25622. 1  | 50   | 0. 36757 | 4. 996765137 | 1  |
| MSTRG. 25622. 2  | 37   | 0. 38952 | 6. 517028809 | 1  |
| MSTRG. 25623. 1  | 61   | 0. 36552 | 10. 53375244 | -1 |
| MSTRG. 25630. 1  | 51   | 0. 41611 | 9. 588562012 | 1  |
| MSTRG. 25631. 2  | 276  | 0. 42977 | 9. 739562988 | 1  |
| MSTRG. 25632. 2  | 171  | 0. 28982 | 4. 498718262 | 1  |
| MSTRG. 25632. 4  | 171  | 0. 35178 | 4. 498718262 | 1  |
| MSTRG. 25635. 1  | 229  | 0. 28683 | 11. 03594971 | 1  |
| MSTRG. 25637. 2  | 980  | 0. 45331 | 5. 929138184 | 1  |
| MSTRG. 25638. 1  | 152  | 0. 36161 | 9. 070861816 | -1 |
| MSTRG. 25638. 2  | 86   | 0. 40392 | 7. 742736816 | 1  |
| MSTRG. 25642. 1  | 55   | 0. 38797 | 4. 657043457 | 1  |
| MSTRG. 25642. 2  | 55   | 0. 399   | 4. 657043457 | 1  |
| MSTRG. 25639. 1  | 20   | 0. 31301 | 10. 00091553 | -1 |
| MSTRG. 25653. 1  | 53   | 0. 39387 | 9. 696228027 | 1  |
| MSTRG. 25654. 2  | 127  | 0. 37256 | 9. 599060059 | 1  |
| MSTRG. 25654. 3  | 127  | 0. 31233 | 9. 599060059 | 1  |
| MSTRG. 25657. 6  | 582  | 0. 47575 | 8. 858093262 | 1  |
| MSTRG. 25657. 7  | 283  | 0. 38974 | 9. 465393066 | 1  |
| MSTRG. 25664. 2  | 459  | 0. 4802  | 4. 698791504 | 1  |
| MSTRG. 25667. 1  | 45   | 0. 36727 | 5. 872009277 | 1  |
| MSTRG. 25711. 1  | 19   | 0. 30605 | 6. 50567627  | 1  |
| MSTRG. 25711. 2  | 49   | 0. 3319  | 5. 510192871 | 1  |
| MSTRG. 25711. 3  | 26   | 0. 30263 | 5. 750305176 | 1  |
| MSTRG. 25711. 4  | 49   | 0. 33889 | 8. 887023926 | 1  |
| MSTRG. 25712. 1  | 103  | 0. 29387 | 4. 971496582 | 1  |
| MSTRG. 25711. 5  | 83   | 0. 33998 | 7. 748596191 | 1  |

|                 |      |          |              |    |
|-----------------|------|----------|--------------|----|
| MSTRG. 25711. 6 | 211  | 0. 35785 | 8. 704040527 | 1  |
| MSTRG. 25711. 7 | 127  | 0. 29283 | 5. 39666748  | 1  |
| MSTRG. 25707. 1 | 57   | 0. 34078 | 8. 768493652 | 1  |
| MSTRG. 25718. 1 | 25   | 0. 29898 | 11. 53900146 | 1  |
| MSTRG. 25723. 2 | 277  | 0. 43627 | 7. 115783691 | 1  |
| MSTRG. 25725. 1 | 84   | 0. 29617 | 9. 116271973 | 1  |
| MSTRG. 25726. 3 | 89   | 0. 4336  | 3. 811950684 | 1  |
| MSTRG. 25730. 2 | 255  | 0. 35635 | 5. 703186035 | 1  |
| MSTRG. 25734. 2 | 445  | 0. 43664 | 8. 27520752  | 1  |
| MSTRG. 25734. 3 | 445  | 0. 45554 | 8. 27520752  | 1  |
| MSTRG. 25736. 1 | 194  | 0. 32849 | 10. 60455322 | 1  |
| MSTRG. 25734. 4 | 134  | 0. 39145 | 5. 420471191 | 1  |
| MSTRG. 25737. 2 | 354  | 0. 38634 | 9. 355773926 | 1  |
| MSTRG. 25747. 4 | 2319 | 0. 46397 | 5. 86138916  | 1  |
| MSTRG. 25747. 2 | 3105 | 0. 41362 | 5. 987121582 | 1  |
| MSTRG. 25748. 1 | 79   | 0. 32081 | 10. 03619385 | 1  |
| MSTRG. 25748. 2 | 79   | 0. 32582 | 10. 03619385 | 1  |
| MSTRG. 25739. 1 | 149  | 0. 38384 | 8. 86907959  | 1  |
| MSTRG. 25749. 1 | 46   | 0. 46874 | 9. 743469238 | 1  |
| MSTRG. 25750. 1 | 39   | 0. 39634 | 6. 210998535 | 1  |
| MSTRG. 25750. 2 | 39   | 0. 39461 | 6. 210998535 | 1  |
| MSTRG. 25752. 1 | 82   | 0. 34343 | 12. 00360107 | 1  |
| MSTRG. 25760. 4 | 842  | 0. 42968 | 5. 773620605 | 1  |
| MSTRG. 25757. 2 | 104  | 0. 43954 | 6. 412414551 | 1  |
| MSTRG. 25771. 2 | 1073 | 0. 3295  | 6. 882873535 | 1  |
| MSTRG. 25772. 1 | 92   | 0. 35485 | 6. 554748535 | 1  |
| MSTRG. 25771. 3 | 917  | 0. 36241 | 7. 164855957 | 1  |
| MSTRG. 25771. 4 | 709  | 0. 36378 | 7. 346984863 | 1  |
| MSTRG. 25771. 5 | 134  | 0. 29507 | 6. 496765137 | 1  |
| MSTRG. 25778. 1 | 413  | 0. 34197 | 7. 963562012 | 1  |
| MSTRG. 25779. 2 | 129  | 0. 40979 | 6. 952209473 | 1  |
| MSTRG. 25779. 3 | 120  | 0. 3799  | 6. 022033691 | 1  |
| MSTRG. 25773. 1 | 37   | 0. 37253 | 5. 302429199 | -1 |
| MSTRG. 25781. 2 | 778  | 0. 45237 | 8. 516784668 | 1  |
| MSTRG. 25782. 1 | 28   | 0. 46198 | 9. 782287598 | 1  |
| MSTRG. 25782. 2 | 28   | 0. 48305 | 9. 782287598 | 1  |
| MSTRG. 25784. 1 | 210  | 0. 26913 | 10. 04803467 | 1  |
| MSTRG. 25785. 2 | 179  | 0. 28284 | 6. 279968262 | 1  |
| MSTRG. 25790. 1 | 36   | 0. 34544 | 8. 938415527 | 1  |
| MSTRG. 25796. 1 | 670  | 0. 32789 | 9. 143249512 | 1  |
| MSTRG. 25796. 2 | 670  | 0. 37351 | 9. 143249512 | 1  |
| MSTRG. 25798. 1 | 130  | 0. 3629  | 8. 858459473 | 1  |
| MSTRG. 25799. 1 | 131  | 0. 31029 | 9. 854553223 | 1  |
| MSTRG. 25802. 1 | 66   | 0. 37497 | 9. 61151123  | 1  |
| MSTRG. 25802. 2 | 90   | 0. 4106  | 8. 635925293 | 1  |
| MSTRG. 25803. 1 | 118  | 0. 44838 | 5. 603088379 | 1  |
| MSTRG. 25808. 1 | 178  | 0. 35546 | 6. 955871582 | 1  |
| MSTRG. 25809. 1 | 134  | 0. 2911  | 9. 385192871 | 1  |
| MSTRG. 25809. 2 | 184  | 0. 30249 | 9. 262268066 | 1  |
| MSTRG. 25809. 3 | 184  | 0. 30249 | 9. 262268066 | 1  |
| MSTRG. 25806. 1 | 94   | 0. 35391 | 6. 68951416  | 1  |
| MSTRG. 25817. 2 | 451  | 0. 36597 | 7. 449401855 | 1  |
| MSTRG. 25817. 3 | 422  | 0. 39622 | 7. 030944824 | 1  |
| MSTRG. 25828. 1 | 601  | 0. 44031 | 8. 743469238 | 1  |

|                  |      |          |              |    |
|------------------|------|----------|--------------|----|
| MSTRG. 25824. 4  | 576  | 0. 46945 | 6. 101867676 | 1  |
| MSTRG. 25847. 1  | 107  | 0. 38655 | 9. 057800293 | 1  |
| MSTRG. 25848. 1  | 173  | 0. 41487 | 8. 824401855 | 1  |
| MSTRG. 25848. 2  | 173  | 0. 33427 | 8. 824401855 | 1  |
| MSTRG. 25849. 1  | 108  | 0. 34165 | 9. 152038574 | -1 |
| MSTRG. 25857. 1  | 83   | 0. 27965 | 8. 818908691 | 1  |
| MSTRG. 25858. 1  | 155  | 0. 35069 | 10. 34527588 | 1  |
| MSTRG. 25857. 2  | 72   | 0. 34331 | 6. 797180176 | 1  |
| MSTRG. 25861. 1  | 141  | 0. 29673 | 6. 570007324 | 1  |
| MSTRG. 25862. 1  | 47   | 0. 40719 | 12. 22735596 | 1  |
| MSTRG. 25869. 1  | 43   | 0. 39134 | 11. 73394775 | -1 |
| MSTRG. 25872. 1  | 79   | 0. 40953 | 10. 53375244 | -1 |
| MSTRG. 25897. 4  | 240  | 0. 39657 | 11. 19927979 | 1  |
| MSTRG. 25897. 6  | 240  | 0. 41083 | 11. 19927979 | 1  |
| MSTRG. 25897. 3  | 240  | 0. 31674 | 11. 19927979 | 1  |
| MSTRG. 25897. 7  | 240  | 0. 38165 | 11. 19927979 | 1  |
| MSTRG. 25898. 1  | 130  | 0. 27994 | 8. 685119629 | 1  |
| MSTRG. 25897. 11 | 70   | 0. 28013 | 7. 741027832 | 1  |
| MSTRG. 25897. 12 | 85   | 0. 27398 | 4. 104797363 | 1  |
| MSTRG. 25897. 13 | 112  | 0. 31048 | 8. 20904541  | 1  |
| MSTRG. 25897. 14 | 127  | 0. 26785 | 11. 32806396 | 1  |
| MSTRG. 25874. 2  | 1183 | 0. 45302 | 5. 975280762 | 1  |
| MSTRG. 25874. 1  | 1487 | 0. 43284 | 6. 703186035 | 1  |
| MSTRG. 25907. 2  | 165  | 0. 3663  | 9. 87286377  | 1  |
| MSTRG. 25907. 3  | 186  | 0. 27794 | 8. 971008301 | 1  |
| MSTRG. 25911. 2  | 291  | 0. 35356 | 6. 892150879 | 1  |
| MSTRG. 25912. 2  | 657  | 0. 46422 | 5. 907653809 | 1  |
| MSTRG. 25916. 1  | 387  | 0. 32485 | 9. 11126709  | 1  |
| MSTRG. 25916. 2  | 387  | 0. 35355 | 9. 11126709  | 1  |
| MSTRG. 25917. 1  | 38   | 0. 46198 | 4. 497619629 | -1 |
| MSTRG. 25923. 1  | 72   | 0. 27547 | 9. 690856934 | 1  |
| MSTRG. 25926. 4  | 407  | 0. 33828 | 8. 66595459  | 1  |
| MSTRG. 25926. 5  | 395  | 0. 4306  | 5. 707702637 | 1  |
| MSTRG. 25927. 1  | 88   | 0. 27918 | 9. 60369873  | 1  |
| MSTRG. 25928. 1  | 114  | 0. 33599 | 9. 055603027 | 1  |
| MSTRG. 25926. 6  | 103  | 0. 37461 | 6. 050476074 | 1  |
| MSTRG. 25929. 1  | 187  | 0. 34731 | 10. 11187744 | 1  |
| MSTRG. 25940. 1  | 446  | 0. 43983 | 8. 229309082 | 1  |
| MSTRG. 25940. 5  | 446  | 0. 46176 | 8. 229309082 | 1  |
| MSTRG. 25940. 3  | 446  | 0. 46005 | 8. 229309082 | 1  |
| MSTRG. 25949. 3  | 1246 | 0. 37533 | 5. 61529541  | 1  |
| MSTRG. 25950. 1  | 130  | 0. 27193 | 10. 03631592 | 1  |
| MSTRG. 25951. 1  | 220  | 0. 30317 | 10. 95245361 | 1  |
| MSTRG. 25949. 5  | 1177 | 0. 39353 | 5. 623840332 | 1  |
| MSTRG. 25949. 6  | 625  | 0. 35156 | 5. 161682129 | 1  |
| MSTRG. 25949. 7  | 586  | 0. 2899  | 5. 864685059 | 1  |
| MSTRG. 25949. 8  | 625  | 0. 44464 | 5. 161682129 | 1  |
| MSTRG. 25956. 1  | 64   | 0. 36537 | 6. 478820801 | 1  |
| MSTRG. 25958. 1  | 145  | 0. 28683 | 10. 09710693 | 1  |
| MSTRG. 25958. 2  | 145  | 0. 29607 | 10. 09710693 | 1  |
| MSTRG. 25958. 3  | 132  | 0. 27651 | 11. 57366943 | 1  |
| MSTRG. 25959. 1  | 130  | 0. 27911 | 8. 237976074 | -1 |
| MSTRG. 25959. 2  | 192  | 0. 28648 | 8. 956115723 | 1  |
| MSTRG. 25959. 3  | 192  | 0. 2782  | 8. 956115723 | 1  |

|                  |      |          |              |    |
|------------------|------|----------|--------------|----|
| MSTRG. 25959. 5  | 175  | 0. 27992 | 9. 781799316 | 1  |
| MSTRG. 25959. 4  | 192  | 0. 30132 | 8. 956115723 | 1  |
| MSTRG. 25959. 6  | 107  | 0. 28567 | 9. 81048584  | 1  |
| MSTRG. 25959. 7  | 175  | 0. 28267 | 9. 781799316 | 1  |
| MSTRG. 25959. 8  | 175  | 0. 29892 | 9. 781799316 | 1  |
| MSTRG. 25960. 1  | 414  | 0. 38219 | 8. 656921387 | 1  |
| MSTRG. 25972. 1  | 61   | 0. 45646 | 9. 819763184 | -1 |
| MSTRG. 25973. 2  | 184  | 0. 38476 | 5. 315856934 | 1  |
| MSTRG. 25973. 3  | 416  | 0. 41751 | 7. 460632324 | 1  |
| MSTRG. 25973. 4  | 255  | 0. 42268 | 9. 191345215 | 1  |
| MSTRG. 25973. 6  | 184  | 0. 40199 | 5. 315856934 | 1  |
| MSTRG. 25977. 1  | 116  | 0. 27739 | 9. 911315918 | 1  |
| MSTRG. 25977. 2  | 185  | 0. 27739 | 11. 82928467 | 1  |
| MSTRG. 25977. 3  | 121  | 0. 30609 | 10. 63214111 | 1  |
| MSTRG. 25978. 2  | 165  | 0. 28415 | 11. 05487061 | 1  |
| MSTRG. 25975. 1  | 45   | 0. 45428 | 10. 0524292  | 1  |
| MSTRG. 25980. 2  | 113  | 0. 44277 | 11. 01202393 | 1  |
| MSTRG. 25997. 5  | 1694 | 0. 36271 | 8. 585632324 | 1  |
| MSTRG. 25997. 4  | 1108 | 0. 38033 | 8. 93548584  | 1  |
| MSTRG. 25997. 1  | 1729 | 0. 37984 | 8. 543395996 | 1  |
| MSTRG. 25997. 2  | 1792 | 0. 36109 | 8. 079406738 | 1  |
| MSTRG. 25997. 6  | 1108 | 0. 36427 | 8. 93548584  | 1  |
| MSTRG. 25998. 1  | 134  | 0. 33925 | 8. 754333496 | 1  |
| MSTRG. 25997. 8  | 1827 | 0. 45343 | 7. 870056152 | 1  |
| MSTRG. 25997. 7  | 1792 | 0. 4338  | 8. 079406738 | 1  |
| MSTRG. 25997. 9  | 1694 | 0. 40301 | 8. 585632324 | 1  |
| MSTRG. 25997. 10 | 1805 | 0. 44198 | 8. 06829834  | 1  |
| MSTRG. 25997. 11 | 1840 | 0. 40301 | 7. 974060059 | 1  |
| MSTRG. 25997. 12 | 1108 | 0. 33905 | 8. 93548584  | 1  |
| MSTRG. 25997. 13 | 199  | 0. 27863 | 9. 352844238 | 1  |
| MSTRG. 25997. 14 | 239  | 0. 35792 | 9. 570739746 | 1  |
| MSTRG. 25997. 18 | 146  | 0. 29227 | 11. 72821045 | 1  |
| MSTRG. 25997. 19 | 40   | 0. 32731 | 7. 978210449 | 1  |
| MSTRG. 25997. 20 | 74   | 0. 26409 | 5. 813781738 | 1  |
| MSTRG. 25997. 21 | 53   | 0. 26498 | 11. 55596924 | 1  |
| MSTRG. 25989. 1  | 155  | 0. 27987 | 6. 497009277 | 1  |
| MSTRG. 25989. 2  | 217  | 0. 27883 | 10. 96575928 | 1  |
| MSTRG. 25989. 3  | 217  | 0. 27883 | 10. 96575928 | 1  |
| MSTRG. 25989. 5  | 217  | 0. 27547 | 10. 96575928 | 1  |
| MSTRG. 25989. 6  | 155  | 0. 27851 | 6. 497009277 | 1  |
| MSTRG. 25991. 1  | 179  | 0. 27274 | 9. 694763184 | 1  |
| MSTRG. 25991. 2  | 179  | 0. 27526 | 9. 694763184 | 1  |
| MSTRG. 25991. 3  | 179  | 0. 2785  | 9. 694763184 | 1  |
| MSTRG. 25991. 4  | 179  | 0. 27526 | 9. 694763184 | 1  |
| MSTRG. 25991. 5  | 179  | 0. 28002 | 9. 694763184 | 1  |
| MSTRG. 25985. 2  | 375  | 0. 30712 | 9. 49822998  | 1  |
| MSTRG. 25986. 1  | 231  | 0. 32507 | 9. 79864502  | 1  |
| MSTRG. 25992. 2  | 655  | 0. 42148 | 6. 46282959  | 1  |
| MSTRG. 25993. 1  | 86   | 0. 30735 | 10. 909729   | 1  |
| MSTRG. 25994. 1  | 83   | 0. 28923 | 11. 44610596 | 1  |
| MSTRG. 25994. 2  | 108  | 0. 28923 | 8. 49017334  | 1  |
| MSTRG. 25995. 1  | 219  | 0. 2948  | 8. 817199707 | 1  |
| MSTRG. 25992. 3  | 152  | 0. 28015 | 8. 61126709  | 1  |
| MSTRG. 25992. 4  | 232  | 0. 34128 | 9. 225891113 | 1  |

|                 |      |          |              |    |
|-----------------|------|----------|--------------|----|
| MSTRG. 26010. 2 | 683  | 0. 44418 | 5. 335021973 | 1  |
| MSTRG. 26010. 3 | 128  | 0. 29816 | 9. 842712402 | 1  |
| MSTRG. 26016. 1 | 103  | 0. 27739 | 6. 816101074 | 1  |
| MSTRG. 26018. 1 | 105  | 0. 33098 | 8. 896789551 | 1  |
| MSTRG. 26021. 1 | 69   | 0. 35776 | 7. 725036621 | 1  |
| MSTRG. 26026. 5 | 221  | 0. 33361 | 7. 487121582 | 1  |
| MSTRG. 26026. 4 | 222  | 0. 32851 | 7. 487121582 | 1  |
| MSTRG. 26026. 2 | 205  | 0. 30464 | 7. 535095215 | 1  |
| MSTRG. 26026. 3 | 206  | 0. 30954 | 6. 866760254 | 1  |
| MSTRG. 26028. 1 | 151  | 0. 43785 | 9. 25958252  | 1  |
| MSTRG. 26033. 1 | 325  | 0. 39958 | 5. 119445801 | 1  |
| MSTRG. 26034. 1 | 34   | 0. 38395 | 9. 83380127  | 1  |
| MSTRG. 26034. 3 | 83   | 0. 39367 | 5. 577819824 | 1  |
| MSTRG. 26034. 2 | 599  | 0. 36935 | 9. 019348145 | 1  |
| MSTRG. 26034. 4 | 68   | 0. 29772 | 5. 553894043 | -1 |
| MSTRG. 26034. 5 | 68   | 0. 37811 | 5. 553894043 | -1 |
| MSTRG. 26034. 6 | 56   | 0. 34961 | 8. 74017334  | 1  |
| MSTRG. 26034. 7 | 56   | 0. 29367 | 8. 799865723 | 1  |
| MSTRG. 26031. 2 | 224  | 0. 49472 | 9. 263366699 | -1 |
| MSTRG. 26031. 3 | 75   | 0. 45389 | 10. 32720947 | 1  |
| MSTRG. 26035. 2 | 2096 | 0. 46255 | 4. 09564209  | 1  |
| MSTRG. 26035. 3 | 2035 | 0. 46255 | 4. 094421387 | 1  |
| MSTRG. 26036. 1 | 431  | 0. 38982 | 6. 804870605 | 1  |
| MSTRG. 26038. 2 | 425  | 0. 46109 | 6. 240539551 | 1  |
| MSTRG. 26038. 3 | 425  | 0. 45985 | 6. 240539551 | 1  |
| MSTRG. 26037. 1 | 317  | 0. 46358 | 4. 992370605 | 1  |
| MSTRG. 26041. 2 | 945  | 0. 47711 | 6. 572570801 | 1  |
| MSTRG. 26042. 1 | 460  | 0. 44326 | 5. 616516113 | 1  |
| MSTRG. 26042. 2 | 460  | 0. 44182 | 5. 616516113 | 1  |
| MSTRG. 26051. 1 | 1349 | 0. 44107 | 6. 411071777 | 1  |
| MSTRG. 26052. 1 | 516  | 0. 4367  | 6. 08380127  | 1  |
| MSTRG. 26053. 3 | 119  | 0. 45745 | 7. 815246582 | 1  |
| MSTRG. 26053. 4 | 694  | 0. 46548 | 8. 272033691 | 1  |
| MSTRG. 26045. 2 | 297  | 0. 35514 | 5. 859436035 | 1  |
| MSTRG. 26048. 1 | 31   | 0. 47418 | 11. 32427979 | 1  |
| MSTRG. 26047. 2 | 94   | 0. 44409 | 7. 862365723 | 1  |
| MSTRG. 26059. 1 | 823  | 0. 44776 | 7. 737609863 | 1  |
| MSTRG. 26059. 2 | 823  | 0. 44032 | 7. 725158691 | 1  |
| MSTRG. 26083. 4 | 1265 | 0. 41724 | 8. 238098145 | 1  |
| MSTRG. 26083. 5 | 1265 | 0. 43774 | 8. 238098145 | 1  |
| MSTRG. 26087. 7 | 173  | 0. 28186 | 6. 471618652 | 1  |
| MSTRG. 26087. 6 | 114  | 0. 35824 | 6. 940490723 | 1  |
| MSTRG. 26087. 5 | 753  | 0. 47329 | 5. 643005371 | 1  |
| MSTRG. 26088. 1 | 123  | 0. 30173 | 7. 622009277 | 1  |
| MSTRG. 26089. 1 | 118  | 0. 29793 | 8. 027770996 | 1  |
| MSTRG. 26091. 1 | 561  | 0. 30041 | 6. 934265137 | 1  |
| MSTRG. 26091. 4 | 486  | 0. 30485 | 8. 522155762 | 1  |
| MSTRG. 26091. 2 | 562  | 0. 30423 | 6. 934265137 | 1  |
| MSTRG. 26093. 1 | 56   | 0. 35475 | 10. 01239014 | 1  |
| MSTRG. 26096. 1 | 82   | 0. 37719 | 8. 235046387 | 1  |
| MSTRG. 26102. 2 | 199  | 0. 44466 | 5. 724914551 | 1  |
| MSTRG. 26106. 1 | 116  | 0. 27987 | 9. 479797363 | 1  |
| MSTRG. 26106. 2 | 116  | 0. 28855 | 9. 479797363 | 1  |
| MSTRG. 26107. 2 | 71   | 0. 32974 | 8. 771057129 | 1  |

|                  |      |          |              |    |
|------------------|------|----------|--------------|----|
| MSTRG. 26108. 1  | 126  | 0. 45878 | 9. 463439941 | 1  |
| MSTRG. 26109. 1  | 77   | 0. 32818 | 10. 30609131 | 1  |
| MSTRG. 26111. 4  | 849  | 0. 45621 | 5. 669494629 | 1  |
| MSTRG. 26112. 2  | 55   | 0. 33955 | 9. 03302002  | 1  |
| MSTRG. 26112. 3  | 157  | 0. 41909 | 9. 163757324 | 1  |
| MSTRG. 26112. 4  | 147  | 0. 37963 | 9. 270568848 | 1  |
| MSTRG. 26113. 1  | 80   | 0. 33468 | 9. 045715332 | 1  |
| MSTRG. 26118. 3  | 224  | 0. 34727 | 9. 096130371 | 1  |
| MSTRG. 26118. 11 | 278  | 0. 27911 | 8. 648376465 | 1  |
| MSTRG. 26118. 12 | 375  | 0. 293   | 8. 232727051 | 1  |
| MSTRG. 26118. 13 | 470  | 0. 30663 | 7. 076965332 | 1  |
| MSTRG. 26120. 1  | 100  | 0. 34624 | 4. 675354004 | 1  |
| MSTRG. 26121. 1  | 80   | 0. 32738 | 11. 05462646 | 1  |
| MSTRG. 26123. 1  | 305  | 0. 35113 | 7. 699645996 | 1  |
| MSTRG. 26123. 2  | 257  | 0. 44278 | 6. 191589355 | 1  |
| MSTRG. 26123. 8  | 286  | 0. 40534 | 6. 419128418 | 1  |
| MSTRG. 26123. 10 | 337  | 0. 48594 | 6. 938171387 | 1  |
| MSTRG. 26123. 12 | 268  | 0. 4162  | 6. 378479004 | 1  |
| MSTRG. 26123. 11 | 289  | 0. 45621 | 5. 956604004 | 1  |
| MSTRG. 26123. 9  | 236  | 0. 39099 | 6. 870544434 | 1  |
| MSTRG. 26123. 14 | 172  | 0. 47114 | 5. 239807129 | -1 |
| MSTRG. 26123. 13 | 121  | 0. 47874 | 5. 278259277 | -1 |
| MSTRG. 26124. 2  | 135  | 0. 31056 | 9. 979187012 | 1  |
| MSTRG. 26126. 2  | 745  | 0. 46582 | 6. 468566895 | 1  |
| MSTRG. 26126. 4  | 99   | 0. 36016 | 9. 939147949 | 1  |
| MSTRG. 26122. 2  | 369  | 0. 43373 | 5. 371276855 | 1  |
| MSTRG. 26138. 1  | 152  | 0. 38566 | 8. 441833496 | -1 |
| MSTRG. 26139. 1  | 76   | 0. 33979 | 9. 300109863 | 1  |
| MSTRG. 26142. 2  | 136  | 0. 33919 | 5. 876403809 | 1  |
| MSTRG. 26142. 3  | 219  | 0. 3229  | 7. 596862793 | 1  |
| MSTRG. 26147. 3  | 569  | 0. 42793 | 6. 911682129 | 1  |
| MSTRG. 26148. 1  | 103  | 0. 29615 | 8. 774108887 | 1  |
| MSTRG. 26147. 6  | 453  | 0. 3713  | 7. 206848145 | 1  |
| MSTRG. 26154. 2  | 165  | 0. 34089 | 6. 639709473 | 1  |
| MSTRG. 26154. 3  | 181  | 0. 38263 | 5. 313903809 | 1  |
| MSTRG. 26158. 3  | 163  | 0. 42171 | 7. 151550293 | 1  |
| MSTRG. 26163. 1  | 87   | 0. 43213 | 4. 873474121 | 1  |
| MSTRG. 26171. 1  | 124  | 0. 31516 | 10. 96380615 | 1  |
| MSTRG. 26171. 3  | 229  | 0. 28062 | 10. 11322021 | 1  |
| MSTRG. 26171. 4  | 99   | 0. 31327 | 8. 934020996 | 1  |
| MSTRG. 26171. 5  | 106  | 0. 40706 | 11. 47564697 | 1  |
| MSTRG. 26180. 1  | 261  | 0. 33345 | 9. 683166504 | 1  |
| MSTRG. 26180. 2  | 1683 | 0. 43488 | 6. 29083252  | 1  |
| MSTRG. 26180. 5  | 1762 | 0. 44269 | 6. 964782715 | 1  |
| MSTRG. 26180. 6  | 1699 | 0. 44889 | 7. 105163574 | 1  |
| MSTRG. 26180. 13 | 1624 | 0. 43088 | 8. 473937988 | 1  |
| MSTRG. 26181. 1  | 83   | 0. 33387 | 8. 441589355 | 1  |
| MSTRG. 26180. 14 | 98   | 0. 37142 | 10. 84747314 | 1  |
| MSTRG. 26180. 17 | 160  | 0. 31482 | 7. 713562012 | 1  |
| MSTRG. 26180. 18 | 160  | 0. 31073 | 7. 713562012 | 1  |
| MSTRG. 26180. 19 | 180  | 0. 27739 | 6. 474182129 | 1  |
| MSTRG. 26180. 20 | 293  | 0. 28338 | 8. 789978027 | 1  |
| MSTRG. 26180. 21 | 293  | 0. 32905 | 8. 789978027 | 1  |
| MSTRG. 26184. 2  | 182  | 0. 33613 | 8. 339172363 | 1  |

|                  |      |          |              |    |
|------------------|------|----------|--------------|----|
| MSTRG. 26184. 3  | 148  | 0. 36591 | 8. 500305176 | 1  |
| MSTRG. 26184. 5  | 129  | 0. 38333 | 8. 63079834  | 1  |
| MSTRG. 26185. 1  | 826  | 0. 36882 | 6. 624938965 | 1  |
| MSTRG. 26185. 3  | 826  | 0. 36056 | 6. 624938965 | 1  |
| MSTRG. 26186. 1  | 60   | 0. 43884 | 9. 624816895 | 1  |
| MSTRG. 26187. 1  | 71   | 0. 33475 | 10. 17254639 | 1  |
| MSTRG. 26182. 2  | 121  | 0. 41731 | 10. 07244873 | 1  |
| MSTRG. 26192. 1  | 25   | 0. 44095 | 7. 753845215 | 1  |
| MSTRG. 26194. 17 | 134  | 0. 39511 | 5. 278625488 | 1  |
| MSTRG. 26189. 2  | 208  | 0. 45189 | 5. 82989502  | -1 |
| MSTRG. 26190. 1  | 43   | 0. 46236 | 4. 749450684 | -1 |
| MSTRG. 26203. 1  | 53   | 0. 44566 | 12. 01251221 | -1 |
| MSTRG. 26212. 1  | 105  | 0. 3133  | 8. 808532715 | 1  |
| MSTRG. 26213. 1  | 98   | 0. 3849  | 7. 569274902 | 1  |
| MSTRG. 26213. 2  | 36   | 0. 40727 | 8. 001281738 | 1  |
| MSTRG. 26213. 3  | 98   | 0. 41072 | 7. 569274902 | 1  |
| MSTRG. 26213. 5  | 98   | 0. 35467 | 7. 569274902 | 1  |
| MSTRG. 26213. 6  | 98   | 0. 39317 | 7. 569274902 | 1  |
| MSTRG. 26214. 3  | 397  | 0. 4688  | 7. 905700684 | 1  |
| MSTRG. 26215. 3  | 305  | 0. 47225 | 5. 161804199 | 1  |
| MSTRG. 26216. 1  | 137  | 0. 43143 | 5. 302307129 | 1  |
| MSTRG. 26220. 2  | 437  | 0. 49235 | 6. 040588379 | 1  |
| MSTRG. 26224. 1  | 438  | 0. 48991 | 6. 259338379 | 1  |
| MSTRG. 26224. 2  | 438  | 0. 44266 | 6. 259338379 | 1  |
| MSTRG. 26224. 3  | 506  | 0. 44195 | 6. 049133301 | 1  |
| MSTRG. 26224. 4  | 438  | 0. 47126 | 6. 259338379 | 1  |
| MSTRG. 26224. 5  | 438  | 0. 43476 | 6. 259338379 | 1  |
| MSTRG. 26226. 1  | 377  | 0. 39079 | 4. 934143066 | 1  |
| MSTRG. 26226. 2  | 255  | 0. 36769 | 4. 708190918 | 1  |
| MSTRG. 26227. 1  | 189  | 0. 33889 | 9. 47442627  | 1  |
| MSTRG. 26230. 2  | 245  | 0. 47576 | 9. 388977051 | 1  |
| MSTRG. 26232. 3  | 1406 | 0. 46654 | 6. 749206543 | 1  |
| MSTRG. 26232. 4  | 1328 | 0. 4705  | 6. 296203613 | 1  |
| MSTRG. 26232. 5  | 1406 | 0. 49403 | 6. 749206543 | 1  |
| MSTRG. 26240. 5  | 1747 | 0. 40698 | 6. 541320801 | 1  |
| MSTRG. 26240. 6  | 1747 | 0. 41907 | 6. 541320801 | 1  |
| MSTRG. 26240. 7  | 1747 | 0. 40698 | 6. 541320801 | 1  |
| MSTRG. 26241. 1  | 86   | 0. 39604 | 8. 858703613 | 1  |
| MSTRG. 26242. 1  | 115  | 0. 33061 | 10. 98248291 | 1  |
| MSTRG. 26244. 1  | 116  | 0. 27146 | 10. 65106201 | 1  |
| MSTRG. 26244. 2  | 177  | 0. 27794 | 10. 25531006 | 1  |
| MSTRG. 26245. 1  | 87   | 0. 33407 | 9. 604309082 | 1  |
| MSTRG. 26246. 1  | 101  | 0. 31558 | 9. 101135254 | 1  |
| MSTRG. 26240. 8  | 61   | 0. 29772 | 9. 298522949 | 1  |
| MSTRG. 26247. 1  | 25   | 0. 40027 | 3. 665710449 | -1 |
| MSTRG. 26247. 2  | 159  | 0. 42439 | 11. 480896   | -1 |
| MSTRG. 26249. 1  | 37   | 0. 39475 | 6. 79095459  | 1  |
| MSTRG. 26239. 1  | 451  | 0. 41971 | 8. 618469238 | 1  |
| MSTRG. 26239. 2  | 614  | 0. 41995 | 8. 713684082 | 1  |
| MSTRG. 26239. 4  | 620  | 0. 40395 | 8. 62677002  | 1  |
| MSTRG. 26259. 5  | 132  | 0. 33263 | 10. 13446045 | 1  |
| MSTRG. 26260. 1  | 233  | 0. 29351 | 11. 39532471 | 1  |
| MSTRG. 26257. 1  | 174  | 0. 31241 | 9. 356384277 | 1  |
| MSTRG. 26257. 2  | 147  | 0. 37031 | 6. 408508301 | -1 |



|                 |     |          |              |   |
|-----------------|-----|----------|--------------|---|
| MSTRG. 26265. 1 | 184 | 0. 47646 | 9. 542785645 | 1 |
| MSTRG. 26266. 1 | 90  | 0. 34981 | 6. 707336426 | 1 |
| MSTRG. 26266. 2 | 144 | 0. 29435 | 7. 669128418 | 1 |
| MSTRG. 26266. 3 | 144 | 0. 29776 | 7. 669128418 | 1 |
| MSTRG. 26281. 1 | 151 | 0. 415   | 10. 57220459 | 1 |
| MSTRG. 26282. 2 | 77  | 0. 38111 | 5. 284606934 | 1 |
| MSTRG. 26286. 2 | 403 | 0. 45082 | 5. 455627441 | 1 |
| MSTRG. 26287. 5 | 86  | 0. 32507 | 9. 852355957 | 1 |
| MSTRG. 26287. 3 | 86  | 0. 36026 | 9. 852355957 | 1 |
| MSTRG. 26287. 4 | 340 | 0. 39717 | 9. 673400879 | 1 |
| MSTRG. 26278. 1 | 105 | 0. 41427 | 11. 2555542  | 1 |
| MSTRG. 26291. 3 | 490 | 0. 38848 | 9. 453186035 | 1 |
| MSTRG. 26291. 6 | 490 | 0. 32265 | 9. 453186035 | 1 |
| MSTRG. 26291. 4 | 544 | 0. 38213 | 9. 340637207 | 1 |
| MSTRG. 26292. 1 | 94  | 0. 41399 | 9. 426452637 | 1 |
| MSTRG. 26297. 3 | 282 | 0. 41887 | 5. 756530762 | 1 |
| MSTRG. 26297. 4 | 38  | 0. 3974  | 4. 36907959  | 1 |
| MSTRG. 26299. 1 | 152 | 0. 3537  | 8. 57220459  | 1 |
| MSTRG. 26301. 1 | 38  | 0. 34723 | 7. 978088379 | 1 |
| MSTRG. 26303. 1 | 391 | 0. 42321 | 8. 416442871 | 1 |
| MSTRG. 26308. 1 | 52  | 0. 37863 | 6. 804016113 | 1 |
| MSTRG. 26308. 2 | 46  | 0. 38215 | 7. 835510254 | 1 |
| MSTRG. 26315. 1 | 110 | 0. 33919 | 5. 817077637 | 1 |
| MSTRG. 26316. 1 | 113 | 0. 35572 | 7. 958190918 | 1 |
| MSTRG. 26321. 1 | 507 | 0. 39878 | 8. 797302246 | 1 |
| MSTRG. 26321. 2 | 385 | 0. 41892 | 8. 820495605 | 1 |
| MSTRG. 26321. 3 | 385 | 0. 44129 | 8. 820495605 | 1 |
| MSTRG. 26321. 4 | 385 | 0. 47938 | 8. 820495605 | 1 |
| MSTRG. 26321. 5 | 85  | 0. 39786 | 8. 140930176 | 1 |
| MSTRG. 26322. 1 | 91  | 0. 37693 | 10. 22003174 | 1 |
| MSTRG. 26323. 1 | 68  | 0. 28526 | 4. 622375488 | 1 |
| MSTRG. 26324. 1 | 64  | 0. 30432 | 9. 93548584  | 1 |
| MSTRG. 26325. 1 | 39  | 0. 27667 | 4. 347595215 | 1 |
| MSTRG. 26338. 1 | 45  | 0. 37452 | 12. 2432251  | 1 |
| MSTRG. 26340. 1 | 302 | 0. 4172  | 9. 468688965 | 1 |
| MSTRG. 26340. 2 | 546 | 0. 46033 | 9. 513000488 | 1 |
| MSTRG. 26337. 1 | 84  | 0. 3665  | 10. 0680542  | 1 |
| MSTRG. 26337. 2 | 27  | 0. 36007 | 8. 402282715 | 1 |
| MSTRG. 26343. 1 | 833 | 0. 46902 | 6. 054748535 | 1 |
| MSTRG. 26344. 1 | 114 | 0. 29826 | 9. 19317627  | 1 |
| MSTRG. 26345. 1 | 91  | 0. 36767 | 7. 51373291  | 1 |
| MSTRG. 26345. 2 | 87  | 0. 28848 | 5. 795959473 | 1 |
| MSTRG. 26346. 1 | 101 | 0. 31368 | 8. 843566895 | 1 |
| MSTRG. 26347. 1 | 55  | 0. 33906 | 9. 696105957 | 1 |
| MSTRG. 26348. 1 | 58  | 0. 31596 | 9. 013244629 | 1 |
| MSTRG. 26349. 1 | 83  | 0. 33929 | 8. 816589355 | 1 |
| MSTRG. 26369. 3 | 476 | 0. 39903 | 7. 153381348 | 1 |
| MSTRG. 26369. 2 | 703 | 0. 33728 | 7. 159240723 | 1 |
| MSTRG. 26369. 4 | 476 | 0. 42131 | 7. 153381348 | 1 |
| MSTRG. 26369. 5 | 476 | 0. 39903 | 7. 153381348 | 1 |
| MSTRG. 26370. 2 | 269 | 0. 42997 | 8. 29486084  | 1 |
| MSTRG. 26373. 2 | 550 | 0. 45661 | 8. 153869629 | 1 |
| MSTRG. 26373. 3 | 550 | 0. 48765 | 8. 153869629 | 1 |
| MSTRG. 26374. 1 | 713 | 0. 49174 | 5. 038024902 | 1 |

|                  |      |          |              |    |
|------------------|------|----------|--------------|----|
| MSTRG. 26375. 1  | 344  | 0. 30242 | 9. 286315918 | 1  |
| MSTRG. 26376. 1  | 71   | 0. 35597 | 6. 944030762 | -1 |
| MSTRG. 26377. 1  | 105  | 0. 3036  | 9. 549499512 | 1  |
| MSTRG. 26374. 5  | 169  | 0. 29835 | 7. 864807129 | 1  |
| MSTRG. 26374. 6  | 178  | 0. 29479 | 8. 966247559 | 1  |
| MSTRG. 26374. 7  | 89   | 0. 30952 | 5. 76763916  | 1  |
| MSTRG. 26374. 8  | 181  | 0. 35889 | 6. 973083496 | 1  |
| MSTRG. 26375. 2  | 158  | 0. 3018  | 11. 39654541 | 1  |
| MSTRG. 26378. 2  | 144  | 0. 27918 | 5. 06829834  | 1  |
| MSTRG. 26379. 7  | 1785 | 0. 4721  | 5. 120178223 | 1  |
| MSTRG. 26379. 6  | 2328 | 0. 47857 | 5. 222595215 | 1  |
| MSTRG. 26379. 9  | 2610 | 0. 47857 | 5. 206726074 | 1  |
| MSTRG. 26386. 1  | 168  | 0. 30191 | 8. 262268066 | 1  |
| MSTRG. 26391. 2  | 213  | 0. 35435 | 10. 20928955 | 1  |
| MSTRG. 26391. 3  | 356  | 0. 3929  | 8. 203430176 | 1  |
| MSTRG. 26391. 4  | 313  | 0. 30981 | 8. 770324707 | 1  |
| MSTRG. 26391. 5  | 114  | 0. 29367 | 9. 513244629 | 1  |
| MSTRG. 26394. 3  | 1503 | 0. 4363  | 6. 18157959  | 1  |
| MSTRG. 26394. 4  | 1502 | 0. 4445  | 6. 18157959  | 1  |
| MSTRG. 26394. 5  | 1502 | 0. 45426 | 6. 18157959  | 1  |
| MSTRG. 26394. 8  | 1513 | 0. 46689 | 6. 182067871 | 1  |
| MSTRG. 26395. 1  | 325  | 0. 33345 | 9. 354797363 | 1  |
| MSTRG. 26394. 10 | 279  | 0. 44017 | 5. 667663574 | 1  |
| MSTRG. 26394. 9  | 280  | 0. 44017 | 5. 667663574 | 1  |
| MSTRG. 26389. 1  | 57   | 0. 41401 | 9. 428894043 | 1  |
| MSTRG. 26428. 1  | 125  | 0. 30981 | 6. 828796387 | 1  |
| MSTRG. 26428. 4  | 78   | 0. 31209 | 9. 666442871 | 1  |
| MSTRG. 26433. 1  | 219  | 0. 2895  | 9. 358581543 | 1  |
| MSTRG. 26434. 1  | 100  | 0. 32394 | 8. 753112793 | 1  |
| MSTRG. 26433. 2  | 252  | 0. 27661 | 8. 957214355 | 1  |
| MSTRG. 26428. 7  | 84   | 0. 43114 | 9. 194885254 | 1  |
| MSTRG. 26399. 8  | 210  | 0. 44449 | 6. 750793457 | 1  |
| MSTRG. 26399. 7  | 221  | 0. 43608 | 5. 70501709  | 1  |
| MSTRG. 26405. 1  | 97   | 0. 30656 | 11. 91522217 | 1  |
| MSTRG. 26405. 2  | 149  | 0. 36212 | 8. 716003418 | 1  |
| MSTRG. 26405. 5  | 149  | 0. 40898 | 8. 716003418 | 1  |
| MSTRG. 26405. 4  | 58   | 0. 31432 | 9. 250427246 | 1  |
| MSTRG. 26405. 6  | 52   | 0. 34299 | 9. 100524902 | 1  |
| MSTRG. 26411. 4  | 483  | 0. 45478 | 9. 151062012 | 1  |
| MSTRG. 26411. 5  | 1209 | 0. 47732 | 5. 820129395 | 1  |
| MSTRG. 26411. 3  | 1209 | 0. 48111 | 5. 820129395 | 1  |
| MSTRG. 26412. 1  | 44   | 0. 2836  | 9. 644836426 | 1  |
| MSTRG. 26413. 1  | 75   | 0. 32464 | 9. 06463623  | 1  |
| MSTRG. 26415. 1  | 39   | 0. 36138 | 10. 94000244 | 1  |
| MSTRG. 26408. 1  | 92   | 0. 33475 | 8. 593444824 | 1  |
| MSTRG. 26439. 1  | 211  | 0. 38849 | 4. 488464355 | 1  |
| MSTRG. 26448. 3  | 1249 | 0. 39432 | 5. 464904785 | 1  |
| MSTRG. 26448. 1  | 2495 | 0. 48018 | 5. 928771973 | 1  |
| MSTRG. 26448. 2  | 2037 | 0. 48018 | 5. 718811035 | 1  |
| MSTRG. 26448. 5  | 2306 | 0. 47296 | 5. 858459473 | 1  |
| MSTRG. 26448. 6  | 844  | 0. 45862 | 6. 287414551 | 1  |
| MSTRG. 26448. 7  | 86   | 0. 31538 | 5. 415100098 | 1  |
| MSTRG. 26452. 3  | 158  | 0. 37487 | 4. 644592285 | 1  |
| MSTRG. 26453. 1  | 130  | 0. 26722 | 9. 745178223 | 1  |

|                  |      |          |              |    |
|------------------|------|----------|--------------|----|
| MSTRG. 26455. 1  | 107  | 0. 33929 | 4. 851867676 | 1  |
| MSTRG. 26446. 4  | 284  | 0. 45098 | 5. 676940918 | 1  |
| MSTRG. 26446. 5  | 86   | 0. 4556  | 6. 577453613 | 1  |
| MSTRG. 26477. 1  | 26   | 0. 38013 | 9. 303649902 | 1  |
| MSTRG. 26491. 1  | 133  | 0. 2921  | 10. 4899292  | 1  |
| MSTRG. 26493. 1  | 173  | 0. 28982 | 11. 44927979 | 1  |
| MSTRG. 26495. 1  | 52   | 0. 37481 | 7. 877624512 | 1  |
| MSTRG. 26498. 1  | 164  | 0. 2759  | 7. 613098145 | 1  |
| MSTRG. 26498. 2  | 166  | 0. 30816 | 8. 371276855 | 1  |
| MSTRG. 26461. 4  | 721  | 0. 29251 | 9. 153137207 | 1  |
| MSTRG. 26461. 2  | 1604 | 0. 4799  | 9. 319396973 | -1 |
| MSTRG. 26461. 3  | 1167 | 0. 3892  | 9. 576477051 | 1  |
| MSTRG. 26461. 5  | 582  | 0. 32005 | 9. 734680176 | 1  |
| MSTRG. 26469. 2  | 268  | 0. 37119 | 6. 354064941 | 1  |
| MSTRG. 26470. 2  | 84   | 0. 35316 | 9. 643249512 | 1  |
| MSTRG. 26470. 3  | 120  | 0. 46181 | 9. 637390137 | 1  |
| MSTRG. 26470. 4  | 94   | 0. 40128 | 9. 719055176 | 1  |
| MSTRG. 26515. 1  | 40   | 0. 41667 | 9. 008239746 | 1  |
| MSTRG. 26515. 2  | 40   | 0. 43014 | 9. 008239746 | 1  |
| MSTRG. 26515. 3  | 40   | 0. 28419 | 9. 008239746 | 1  |
| MSTRG. 26521. 1  | 70   | 0. 34935 | 9. 098205566 | -1 |
| MSTRG. 26533. 1  | 27   | 0. 29058 | 10. 54852295 | 1  |
| MSTRG. 26541. 1  | 63   | 0. 42205 | 8. 768859863 | -1 |
| MSTRG. 26567. 1  | 37   | 0. 2849  | 10. 93133545 | 1  |
| MSTRG. 26569. 2  | 801  | 0. 42111 | 4. 03338623  | 1  |
| MSTRG. 26569. 5  | 770  | 0. 41859 | 4. 058166504 | 1  |
| MSTRG. 26569. 6  | 753  | 0. 42011 | 4. 074523926 | 1  |
| MSTRG. 26569. 7  | 785  | 0. 42111 | 4. 045593262 | 1  |
| MSTRG. 26569. 8  | 641  | 0. 42383 | 4. 198181152 | 1  |
| MSTRG. 26569. 3  | 640  | 0. 42383 | 4. 207336426 | 1  |
| MSTRG. 26569. 4  | 705  | 0. 42259 | 4. 116149902 | 1  |
| MSTRG. 26569. 10 | 786  | 0. 42111 | 4. 04486084  | 1  |
| MSTRG. 26569. 11 | 753  | 0. 42111 | 4. 081115723 | 1  |
| MSTRG. 26569. 12 | 657  | 0. 42383 | 4. 176086426 | 1  |
| MSTRG. 26569. 9  | 753  | 0. 42111 | 4. 073913574 | 1  |
| MSTRG. 26570. 1  | 102  | 0. 31292 | 6. 954162598 | 1  |
| MSTRG. 26571. 1  | 257  | 0. 28982 | 7. 585144043 | 1  |
| MSTRG. 26571. 2  | 189  | 0. 29772 | 9. 235900879 | 1  |
| MSTRG. 26573. 1  | 277  | 0. 32477 | 6. 659240723 | 1  |
| MSTRG. 26574. 1  | 74   | 0. 36698 | 10. 09747314 | 1  |
| MSTRG. 26574. 2  | 113  | 0. 29236 | 9. 36529541  | 1  |
| MSTRG. 26571. 3  | 244  | 0. 30191 | 9. 913391113 | 1  |
| MSTRG. 26572. 4  | 183  | 0. 32595 | 9. 940856934 | 1  |
| MSTRG. 26572. 5  | 183  | 0. 29725 | 9. 940856934 | 1  |
| MSTRG. 26572. 6  | 216  | 0. 3     | 8. 822937012 | 1  |
| MSTRG. 26572. 7  | 48   | 0. 36161 | 7. 979064941 | 1  |
| MSTRG. 26572. 8  | 86   | 0. 36852 | 10. 70220947 | 1  |
| MSTRG. 26572. 9  | 74   | 0. 41511 | 4. 950134277 | 1  |
| MSTRG. 26572. 10 | 183  | 0. 33425 | 10. 762146   | 1  |
| MSTRG. 26572. 11 | 71   | 0. 29751 | 9. 098449707 | 1  |
| MSTRG. 26572. 12 | 108  | 0. 27794 | 7. 66595459  | 1  |
| MSTRG. 26572. 13 | 130  | 0. 36092 | 7. 75201416  | 1  |
| MSTRG. 26572. 14 | 288  | 0. 46864 | 7. 48614502  | -1 |
| MSTRG. 26572. 15 | 190  | 0. 32658 | 9. 693054199 | 1  |

|                  |      |          |              |    |
|------------------|------|----------|--------------|----|
| MSTRG. 26572. 16 | 190  | 0. 30016 | 9. 693054199 | 1  |
| MSTRG. 26572. 17 | 190  | 0. 32405 | 9. 693054199 | 1  |
| MSTRG. 26575. 1  | 344  | 0. 44019 | 5. 911804199 | 1  |
| MSTRG. 26542. 4  | 421  | 0. 41105 | 4. 777038574 | 1  |
| MSTRG. 26542. 3  | 421  | 0. 39892 | 4. 777038574 | 1  |
| MSTRG. 26542. 6  | 107  | 0. 3238  | 9. 221252441 | 1  |
| MSTRG. 26552. 3  | 690  | 0. 34597 | 6. 175720215 | 1  |
| MSTRG. 26552. 5  | 849  | 0. 36154 | 6. 460876465 | 1  |
| MSTRG. 26553. 2  | 666  | 0. 42206 | 6. 204040527 | 1  |
| MSTRG. 26553. 1  | 666  | 0. 42233 | 6. 204040527 | 1  |
| MSTRG. 26554. 2  | 1526 | 0. 37006 | 4. 394226074 | 1  |
| MSTRG. 26554. 1  | 1521 | 0. 41515 | 4. 397277832 | 1  |
| MSTRG. 26554. 4  | 1561 | 0. 4352  | 4. 42755127  | 1  |
| MSTRG. 26554. 3  | 1561 | 0. 44742 | 4. 42755127  | 1  |
| MSTRG. 26554. 5  | 1126 | 0. 4198  | 4. 472473145 | 1  |
| MSTRG. 26555. 3  | 2856 | 0. 46123 | 4. 760803223 | 1  |
| MSTRG. 26557. 2  | 1201 | 0. 42996 | 5. 198303223 | 1  |
| MSTRG. 26546. 1  | 701  | 0. 42169 | 5. 05279541  | 1  |
| MSTRG. 26547. 1  | 171  | 0. 32322 | 11. 09234619 | 1  |
| MSTRG. 26547. 2  | 171  | 0. 38126 | 11. 09234619 | 1  |
| MSTRG. 26548. 3  | 458  | 0. 48067 | 6. 554626465 | 1  |
| MSTRG. 26548. 5  | 505  | 0. 48015 | 6. 38104248  | 1  |
| MSTRG. 26560. 1  | 524  | 0. 35777 | 6. 743591309 | 1  |
| MSTRG. 26563. 1  | 2005 | 0. 43123 | 5. 739196777 | 1  |
| MSTRG. 26586. 3  | 553  | 0. 4628  | 4. 776916504 | 1  |
| MSTRG. 26593. 1  | 1108 | 0. 4603  | 6. 163146973 | -1 |
| MSTRG. 26585. 2  | 490  | 0. 35164 | 9. 402893066 | 1  |
| MSTRG. 26594. 3  | 448  | 0. 35181 | 4. 561340332 | 1  |
| MSTRG. 26595. 1  | 1976 | 0. 46313 | 5. 269714355 | 1  |
| MSTRG. 26596. 1  | 67   | 0. 33678 | 10. 0244751  | 1  |
| MSTRG. 26598. 1  | 296  | 0. 28159 | 4. 757263184 | 1  |
| MSTRG. 26602. 2  | 660  | 0. 44555 | 7. 956481934 | 1  |
| MSTRG. 26602. 3  | 1036 | 0. 43984 | 8. 017272949 | 1  |
| MSTRG. 26601. 2  | 454  | 0. 45715 | 6. 199401855 | 1  |
| MSTRG. 26611. 2  | 127  | 0. 26261 | 8. 426696777 | 1  |
| MSTRG. 26614. 1  | 83   | 0. 31761 | 8. 709899902 | 1  |
| MSTRG. 26615. 1  | 47   | 0. 3667  | 4. 36895752  | 1  |
| MSTRG. 26615. 2  | 47   | 0. 42367 | 4. 36895752  | 1  |
| MSTRG. 26616. 1  | 148  | 0. 38888 | 9. 895690918 | 1  |
| MSTRG. 26616. 2  | 35   | 0. 32899 | 8. 633850098 | -1 |
| MSTRG. 26617. 2  | 142  | 0. 42079 | 9. 415710449 | 1  |
| MSTRG. 26617. 3  | 242  | 0. 28091 | 9. 25213623  | 1  |
| MSTRG. 26617. 4  | 242  | 0. 31917 | 9. 25213623  | 1  |
| MSTRG. 26620. 4  | 82   | 0. 43362 | 5. 589294434 | -1 |
| MSTRG. 26624. 4  | 852  | 0. 45453 | 9. 393127441 | 1  |
| MSTRG. 26623. 3  | 175  | 0. 44446 | 10. 79656982 | 1  |
| MSTRG. 26630. 3  | 104  | 0. 32989 | 4. 910095215 | 1  |
| MSTRG. 26630. 2  | 766  | 0. 40478 | 8. 566345215 | 1  |
| MSTRG. 26630. 4  | 812  | 0. 42123 | 8. 299499512 | 1  |
| MSTRG. 26636. 2  | 81   | 0. 28334 | 9. 883728027 | 1  |
| MSTRG. 26637. 4  | 1005 | 0. 34896 | 4. 846130371 | 1  |
| MSTRG. 26637. 5  | 886  | 0. 44285 | 4. 754821777 | 1  |
| MSTRG. 26644. 1  | 976  | 0. 4758  | 5. 843933105 | 1  |
| MSTRG. 26645. 1  | 127  | 0. 27251 | 7. 052062988 | 1  |

|                  |     |          |              |    |
|------------------|-----|----------|--------------|----|
| MSTRG. 26644. 2  | 976 | 0. 4758  | 5. 843933105 | 1  |
| MSTRG. 26644. 5  | 928 | 0. 39381 | 5. 729064941 | 1  |
| MSTRG. 26642. 1  | 76  | 0. 39926 | 10. 02459717 | 1  |
| MSTRG. 26643. 1  | 102 | 0. 2911  | 5. 66973877  | 1  |
| MSTRG. 26646. 1  | 126 | 0. 29719 | 6. 40447998  | 1  |
| MSTRG. 26647. 1  | 186 | 0. 36055 | 9. 75604248  | 1  |
| MSTRG. 26647. 2  | 184 | 0. 40656 | 9. 75604248  | -1 |
| MSTRG. 26651. 1  | 36  | 0. 34711 | 10. 76312256 | 1  |
| MSTRG. 26652. 1  | 241 | 0. 34885 | 9. 546691895 | 1  |
| MSTRG. 26657. 2  | 139 | 0. 41428 | 4. 343566895 | 1  |
| MSTRG. 26658. 2  | 78  | 0. 40652 | 4. 930603027 | 1  |
| MSTRG. 26660. 2  | 739 | 0. 38676 | 6. 96282959  | 1  |
| MSTRG. 26660. 1  | 739 | 0. 4441  | 6. 96282959  | 1  |
| MSTRG. 26660. 8  | 511 | 0. 41385 | 8. 284118652 | 1  |
| MSTRG. 26660. 6  | 672 | 0. 41783 | 8. 914123535 | 1  |
| MSTRG. 26660. 10 | 739 | 0. 42733 | 6. 96282959  | 1  |
| MSTRG. 26660. 11 | 51  | 0. 26189 | 8. 85736084  | 1  |
| MSTRG. 26660. 12 | 745 | 0. 3439  | 6. 785461426 | 1  |
| MSTRG. 26665. 1  | 63  | 0. 28914 | 8. 886047363 | 1  |
| MSTRG. 26662. 1  | 39  | 0. 36164 | 4. 797058105 | 1  |
| MSTRG. 26667. 1  | 90  | 0. 43373 | 9. 03338623  | 1  |
| MSTRG. 26668. 1  | 78  | 0. 38688 | 6. 702575684 | -1 |
| MSTRG. 26671. 1  | 132 | 0. 32014 | 10. 55975342 | 1  |
| MSTRG. 26675. 2  | 594 | 0. 43301 | 5. 604064941 | 1  |
| MSTRG. 26675. 6  | 594 | 0. 43878 | 5. 604064941 | 1  |
| MSTRG. 26675. 7  | 323 | 0. 38791 | 5. 96661377  | 1  |
| MSTRG. 26675. 5  | 674 | 0. 43716 | 6. 52154541  | 1  |
| MSTRG. 26675. 8  | 316 | 0. 38604 | 5. 809509277 | 1  |
| MSTRG. 26675. 11 | 294 | 0. 42127 | 7. 01385498  | 1  |
| MSTRG. 26675. 12 | 267 | 0. 27598 | 8. 516662598 | 1  |
| MSTRG. 26677. 2  | 102 | 0. 27863 | 6. 252746582 | 1  |
| MSTRG. 26677. 1  | 74  | 0. 37812 | 6. 951721191 | 1  |
| MSTRG. 26680. 2  | 600 | 0. 45709 | 8. 601013184 | 1  |
| MSTRG. 26684. 1  | 417 | 0. 40583 | 8. 909973145 | 1  |
| MSTRG. 26684. 2  | 419 | 0. 34299 | 8. 704528809 | 1  |
| MSTRG. 26684. 4  | 384 | 0. 32983 | 8. 990905762 | 1  |
| MSTRG. 26684. 6  | 420 | 0. 39453 | 9. 189880371 | 1  |
| MSTRG. 26685. 3  | 265 | 0. 32686 | 5. 019470215 | 1  |
| MSTRG. 26685. 2  | 293 | 0. 32663 | 4. 722839355 | 1  |
| MSTRG. 26686. 1  | 197 | 0. 39749 | 11. 80841064 | 1  |
| MSTRG. 26688. 1  | 99  | 0. 29075 | 11. 8583374  | 1  |
| MSTRG. 26707. 1  | 34  | 0. 38898 | 8. 023376465 | 1  |
| MSTRG. 26709. 1  | 32  | 0. 36092 | 4. 797058105 | 1  |
| MSTRG. 26710. 1  | 343 | 0. 45647 | 6. 026916504 | 1  |
| MSTRG. 26710. 3  | 343 | 0. 48434 | 6. 026916504 | 1  |
| MSTRG. 26710. 11 | 343 | 0. 49931 | 6. 026916504 | 1  |
| MSTRG. 26710. 12 | 421 | 0. 46051 | 6. 262145996 | 1  |
| MSTRG. 26711. 1  | 68  | 0. 30193 | 9. 48614502  | 1  |
| MSTRG. 26708. 1  | 86  | 0. 34332 | 8. 46307373  | 1  |
| MSTRG. 26715. 1  | 217 | 0. 36735 | 9. 501037598 | 1  |
| MSTRG. 26715. 2  | 217 | 0. 35902 | 9. 501037598 | 1  |
| MSTRG. 26715. 3  | 217 | 0. 31195 | 9. 501037598 | 1  |
| MSTRG. 26715. 4  | 217 | 0. 32345 | 9. 501037598 | 1  |
| MSTRG. 26715. 7  | 217 | 0. 348   | 9. 501037598 | 1  |

|                  |      |          |              |   |
|------------------|------|----------|--------------|---|
| MSTRG. 26715. 8  | 217  | 0. 36009 | 9. 501037598 | 1 |
| MSTRG. 26715. 9  | 88   | 0. 35544 | 10. 33087158 | 1 |
| MSTRG. 26720. 2  | 324  | 0. 37579 | 7. 196716309 | 1 |
| MSTRG. 26720. 5  | 408  | 0. 32475 | 6. 979553223 | 1 |
| MSTRG. 26720. 6  | 116  | 0. 28711 | 8. 990539551 | 1 |
| MSTRG. 26720. 7  | 443  | 0. 37751 | 6. 649475098 | 1 |
| MSTRG. 26712. 4  | 178  | 0. 46775 | 9. 66192627  | 1 |
| MSTRG. 26712. 3  | 249  | 0. 36554 | 9. 653015137 | 1 |
| MSTRG. 26712. 2  | 237  | 0. 36552 | 9. 205505371 | 1 |
| MSTRG. 26713. 1  | 98   | 0. 34189 | 9. 891906738 | 1 |
| MSTRG. 26722. 2  | 124  | 0. 26913 | 11. 29119873 | 1 |
| MSTRG. 26722. 3  | 619  | 0. 32931 | 7. 820983887 | 1 |
| MSTRG. 26722. 4  | 176  | 0. 33863 | 4. 812683105 | 1 |
| MSTRG. 26725. 5  | 1323 | 0. 3838  | 5. 543640137 | 1 |
| MSTRG. 26725. 6  | 1349 | 0. 4347  | 5. 500061035 | 1 |
| MSTRG. 26725. 8  | 718  | 0. 37355 | 6. 071350098 | 1 |
| MSTRG. 26726. 2  | 266  | 0. 31297 | 9. 700744629 | 1 |
| MSTRG. 26726. 1  | 115  | 0. 41228 | 8. 865905762 | 1 |
| MSTRG. 26727. 1  | 95   | 0. 3     | 9. 222595215 | 1 |
| MSTRG. 26727. 2  | 124  | 0. 35525 | 5. 534851074 | 1 |
| MSTRG. 26727. 4  | 486  | 0. 37676 | 6. 559509277 | 1 |
| MSTRG. 26727. 3  | 486  | 0. 34072 | 6. 559509277 | 1 |
| MSTRG. 26727. 5  | 474  | 0. 36579 | 6. 559509277 | 1 |
| MSTRG. 26728. 1  | 151  | 0. 26818 | 8. 37322998  | 1 |
| MSTRG. 26728. 2  | 152  | 0. 28883 | 5. 602600098 | 1 |
| MSTRG. 26729. 1  | 128  | 0. 3046  | 6. 74005127  | 1 |
| MSTRG. 26739. 3  | 499  | 0. 4159  | 9. 162902832 | 1 |
| MSTRG. 26739. 4  | 1644 | 0. 46875 | 5. 964416504 | 1 |
| MSTRG. 26739. 5  | 1644 | 0. 46179 | 5. 964416504 | 1 |
| MSTRG. 26741. 1  | 85   | 0. 28096 | 5. 461242676 | 1 |
| MSTRG. 26744. 1  | 635  | 0. 46071 | 6. 41607666  | 1 |
| MSTRG. 26744. 4  | 853  | 0. 45499 | 7. 017150879 | 1 |
| MSTRG. 26742. 2  | 200  | 0. 4544  | 5. 608215332 | 1 |
| MSTRG. 26742. 3  | 200  | 0. 44506 | 5. 608215332 | 1 |
| MSTRG. 26748. 1  | 240  | 0. 33623 | 11. 324646   | 1 |
| MSTRG. 26749. 1  | 429  | 0. 46445 | 5. 405212402 | 1 |
| MSTRG. 26749. 2  | 429  | 0. 44547 | 5. 405212402 | 1 |
| MSTRG. 26751. 1  | 729  | 0. 39218 | 9. 53338623  | 1 |
| MSTRG. 26751. 4  | 28   | 0. 41636 | 4. 496887207 | 1 |
| MSTRG. 26751. 6  | 127  | 0. 2785  | 9. 147888184 | 1 |
| MSTRG. 26751. 5  | 608  | 0. 34844 | 9. 731750488 | 1 |
| MSTRG. 26751. 7  | 722  | 0. 42364 | 9. 640930176 | 1 |
| MSTRG. 26751. 3  | 728  | 0. 42364 | 9. 553649902 | 1 |
| MSTRG. 26751. 8  | 74   | 0. 2951  | 4. 172180176 | 1 |
| MSTRG. 26753. 1  | 86   | 0. 32477 | 9. 682312012 | 1 |
| MSTRG. 26751. 9  | 509  | 0. 28923 | 9. 391174316 | 1 |
| MSTRG. 26754. 1  | 99   | 0. 31454 | 9. 430969238 | 1 |
| MSTRG. 26757. 2  | 381  | 0. 40448 | 5. 473083496 | 1 |
| MSTRG. 26773. 20 | 127  | 0. 31503 | 8. 393005371 | 1 |
| MSTRG. 26774. 2  | 136  | 0. 3875  | 7. 640075684 | 1 |
| MSTRG. 26776. 1  | 70   | 0. 33455 | 6. 567810059 | 1 |
| MSTRG. 26777. 2  | 1081 | 0. 4558  | 6. 827087402 | 1 |
| MSTRG. 26777. 3  | 1081 | 0. 47466 | 6. 827087402 | 1 |
| MSTRG. 26765. 1  | 60   | 0. 296   | 11. 60284424 | 1 |

|                 |      |          |              |    |
|-----------------|------|----------|--------------|----|
| MSTRG. 26770. 1 | 330  | 0. 2545  | 8. 663024902 | 1  |
| MSTRG. 26770. 2 | 371  | 0. 27753 | 8. 995544434 | 1  |
| MSTRG. 26790. 1 | 436  | 0. 42138 | 5. 090393066 | -1 |
| MSTRG. 26790. 3 | 1221 | 0. 44803 | 5. 40838623  | 1  |
| MSTRG. 26788. 2 | 123  | 0. 33402 | 5. 627380371 | 1  |
| MSTRG. 26786. 1 | 223  | 0. 40518 | 9. 298278809 | 1  |
| MSTRG. 26792. 3 | 1613 | 0. 42434 | 6. 51776123  | 1  |
| MSTRG. 26792. 4 | 1571 | 0. 41608 | 6. 337341309 | 1  |
| MSTRG. 26793. 2 | 3721 | 0. 41915 | 5. 585998535 | -1 |
| MSTRG. 26793. 3 | 3813 | 0. 41915 | 5. 569763184 | -1 |
| MSTRG. 26795. 2 | 117  | 0. 30643 | 9. 857727051 | 1  |
| MSTRG. 26795. 3 | 117  | 0. 32953 | 9. 857727051 | 1  |
| MSTRG. 26796. 1 | 222  | 0. 31609 | 4. 645446777 | 1  |
| MSTRG. 26796. 2 | 222  | 0. 36263 | 4. 645446777 | 1  |
| MSTRG. 26796. 3 | 222  | 0. 35277 | 4. 645446777 | 1  |
| MSTRG. 26798. 2 | 235  | 0. 25474 | 9. 393127441 | 1  |
| MSTRG. 26803. 3 | 889  | 0. 46983 | 6. 028137207 | 1  |
| MSTRG. 26804. 1 | 157  | 0. 2704  | 10. 14703369 | 1  |
| MSTRG. 26805. 1 | 125  | 0. 36313 | 9. 400085449 | 1  |
| MSTRG. 26806. 7 | 100  | 0. 34848 | 7. 794372559 | 1  |
| MSTRG. 26806. 8 | 100  | 0. 34848 | 7. 794372559 | 1  |
| MSTRG. 26806. 4 | 100  | 0. 34571 | 7. 794372559 | 1  |
| MSTRG. 26806. 5 | 167  | 0. 27721 | 10. 84320068 | 1  |
| MSTRG. 26808. 1 | 103  | 0. 3383  | 11. 5413208  | 1  |
| MSTRG. 26808. 2 | 103  | 0. 35582 | 11. 5413208  | 1  |
| MSTRG. 26821. 1 | 86   | 0. 32729 | 9. 297424316 | 1  |
| MSTRG. 26821. 3 | 175  | 0. 41757 | 9. 342468262 | 1  |
| MSTRG. 26821. 4 | 86   | 0. 37079 | 9. 297424316 | 1  |
| MSTRG. 26821. 5 | 86   | 0. 33137 | 9. 297424316 | 1  |
| MSTRG. 26821. 6 | 129  | 0. 43258 | 9. 725646973 | 1  |
| MSTRG. 26830. 1 | 237  | 0. 36203 | 9. 024108887 | 1  |
| MSTRG. 26830. 2 | 170  | 0. 34449 | 5. 391052246 | -1 |
| MSTRG. 26830. 3 | 127  | 0. 2849  | 10. 69659424 | 1  |
| MSTRG. 26828. 2 | 1208 | 0. 32763 | 6. 844299316 | 1  |
| MSTRG. 26835. 2 | 68   | 0. 3922  | 10. 01397705 | 1  |
| MSTRG. 26836. 2 | 616  | 0. 37183 | 6. 063903809 | 1  |
| MSTRG. 26836. 3 | 76   | 0. 35936 | 10. 91607666 | 1  |
| MSTRG. 26837. 2 | 497  | 0. 29615 | 8. 827697754 | 1  |
| MSTRG. 26837. 4 | 1118 | 0. 45535 | 6. 149597168 | 1  |
| MSTRG. 26837. 5 | 464  | 0. 44033 | 5. 365905762 | 1  |
| MSTRG. 26841. 1 | 65   | 0. 33438 | 9. 519348145 | 1  |
| MSTRG. 26843. 2 | 235  | 0. 36161 | 6. 037780762 | 1  |
| MSTRG. 26844. 1 | 248  | 0. 41113 | 8. 876647949 | 1  |
| MSTRG. 26845. 1 | 68   | 0. 31445 | 10. 02618408 | 1  |
| MSTRG. 26853. 1 | 130  | 0. 32119 | 8. 492126465 | 1  |
| MSTRG. 26838. 1 | 65   | 0. 32828 | 7. 781311035 | 1  |
| MSTRG. 26855. 1 | 79   | 0. 39769 | 9. 773376465 | 1  |
| MSTRG. 26856. 1 | 50   | 0. 38403 | 5. 975402832 | -1 |
| MSTRG. 26863. 4 | 142  | 0. 30627 | 9. 301452637 | 1  |
| MSTRG. 26863. 5 | 420  | 0. 34547 | 8. 163024902 | 1  |
| MSTRG. 26864. 1 | 80   | 0. 28096 | 9. 334533691 | 1  |
| MSTRG. 26865. 1 | 135  | 0. 29772 | 8. 494812012 | 1  |
| MSTRG. 26866. 1 | 165  | 0. 3556  | 10. 76629639 | 1  |
| MSTRG. 26867. 1 | 83   | 0. 29343 | 11. 46002197 | 1  |

|                  |      |          |              |    |
|------------------|------|----------|--------------|----|
| MSTRG. 26868. 1  | 65   | 0. 34162 | 9. 138244629 | 1  |
| MSTRG. 26868. 2  | 119  | 0. 28982 | 9. 300598145 | 1  |
| MSTRG. 26868. 3  | 101  | 0. 2765  | 9. 605163574 | 1  |
| MSTRG. 26870. 1  | 28   | 0. 34358 | 4. 867858887 | -1 |
| MSTRG. 26858. 1  | 54   | 0. 35391 | 11. 00860596 | -1 |
| MSTRG. 26861. 1  | 101  | 0. 41786 | 7. 007385254 | 1  |
| MSTRG. 26861. 2  | 57   | 0. 33424 | 11. 41766357 | -1 |
| MSTRG. 26889. 8  | 333  | 0. 38505 | 9. 165344238 | 1  |
| MSTRG. 26889. 9  | 412  | 0. 45246 | 6. 954162598 | 1  |
| MSTRG. 26889. 4  | 371  | 0. 43663 | 9. 140686035 | 1  |
| MSTRG. 26889. 7  | 427  | 0. 44936 | 8. 601989746 | 1  |
| MSTRG. 26889. 6  | 628  | 0. 45331 | 8. 160949707 | 1  |
| MSTRG. 26889. 5  | 412  | 0. 38733 | 6. 954162598 | 1  |
| MSTRG. 26889. 3  | 630  | 0. 37347 | 7. 94342041  | 1  |
| MSTRG. 26889. 2  | 424  | 0. 37619 | 8. 877380371 | 1  |
| MSTRG. 26889. 10 | 99   | 0. 28671 | 10. 30279541 | 1  |
| MSTRG. 26889. 11 | 76   | 0. 31299 | 11. 37139893 | 1  |
| MSTRG. 26890. 1  | 42   | 0. 34353 | 10. 91619873 | 1  |
| MSTRG. 26889. 12 | 244  | 0. 35547 | 7. 206481934 | 1  |
| MSTRG. 26891. 1  | 88   | 0. 28167 | 8. 803771973 | 1  |
| MSTRG. 26892. 1  | 125  | 0. 3046  | 9. 076965332 | 1  |
| MSTRG. 26894. 1  | 105  | 0. 30637 | 8. 555603027 | 1  |
| MSTRG. 26879. 2  | 210  | 0. 36306 | 5. 514587402 | 1  |
| MSTRG. 26879. 3  | 117  | 0. 29059 | 7. 616271973 | 1  |
| MSTRG. 26880. 2  | 158  | 0. 28096 | 9. 461853027 | 1  |
| MSTRG. 26898. 1  | 112  | 0. 36362 | 5. 657897949 | 1  |
| MSTRG. 26903. 2  | 642  | 0. 46832 | 8. 656555176 | 1  |
| MSTRG. 26904. 1  | 122  | 0. 36153 | 8. 755065918 | 1  |
| MSTRG. 26902. 1  | 831  | 0. 38464 | 6. 812927246 | 1  |
| MSTRG. 26910. 3  | 71   | 0. 47195 | 4. 087463379 | 1  |
| MSTRG. 26910. 4  | 106  | 0. 41992 | 4. 207824707 | 1  |
| MSTRG. 26910. 5  | 71   | 0. 47531 | 4. 087463379 | 1  |
| MSTRG. 26919. 8  | 666  | 0. 38467 | 5. 499328613 | 1  |
| MSTRG. 26919. 5  | 1223 | 0. 41852 | 8. 645690918 | 1  |
| MSTRG. 26919. 1  | 1491 | 0. 45277 | 8. 722229004 | 1  |
| MSTRG. 26919. 2  | 1492 | 0. 45277 | 8. 765441895 | 1  |
| MSTRG. 26919. 3  | 1455 | 0. 45072 | 8. 52923584  | 1  |
| MSTRG. 26919. 7  | 1492 | 0. 45072 | 8. 765441895 | 1  |
| MSTRG. 26919. 9  | 1513 | 0. 45277 | 8. 801574707 | 1  |
| MSTRG. 26919. 10 | 1417 | 0. 45072 | 8. 629211426 | 1  |
| MSTRG. 26920. 1  | 133  | 0. 40366 | 7. 777893066 | 1  |
| MSTRG. 26932. 1  | 400  | 0. 44223 | 5. 373962402 | 1  |
| MSTRG. 26932. 4  | 343  | 0. 41097 | 6. 128967285 | 1  |
| MSTRG. 26932. 5  | 295  | 0. 42103 | 5. 156555176 | 1  |
| MSTRG. 26932. 7  | 404  | 0. 42588 | 5. 09173584  | 1  |
| MSTRG. 26932. 6  | 369  | 0. 39023 | 5. 063415527 | 1  |
| MSTRG. 26932. 8  | 369  | 0. 42276 | 5. 063415527 | 1  |
| MSTRG. 26932. 9  | 346  | 0. 4234  | 5. 092956543 | 1  |
| MSTRG. 26932. 10 | 289  | 0. 39621 | 5. 519104004 | 1  |
| MSTRG. 26933. 3  | 517  | 0. 46302 | 5. 235900879 | 1  |
| MSTRG. 26937. 2  | 2969 | 0. 46306 | 6. 092834473 | 1  |
| MSTRG. 26937. 5  | 3001 | 0. 46327 | 6. 083435059 | 1  |
| MSTRG. 26929. 1  | 780  | 0. 45507 | 9. 53729248  | 1  |
| MSTRG. 26929. 2  | 800  | 0. 43959 | 9. 56854248  | 1  |



|                  |      |          |              |    |
|------------------|------|----------|--------------|----|
| MSTRG. 26930. 1  | 70   | 0. 33675 | 5. 944396973 | 1  |
| MSTRG. 26941. 9  | 389  | 0. 43167 | 5. 878356934 | 1  |
| MSTRG. 26941. 8  | 2221 | 0. 45959 | 5. 205383301 | 1  |
| MSTRG. 26941. 10 | 2256 | 0. 46238 | 5. 194396973 | 1  |
| MSTRG. 26941. 11 | 2254 | 0. 46238 | 5. 194396973 | 1  |
| MSTRG. 26941. 13 | 2110 | 0. 43675 | 5. 187561035 | 1  |
| MSTRG. 26941. 14 | 248  | 0. 45173 | 5. 644958496 | 1  |
| MSTRG. 26941. 15 | 79   | 0. 3205  | 5. 973937988 | 1  |
| MSTRG. 26942. 1  | 281  | 0. 32598 | 5. 120422363 | 1  |
| MSTRG. 26943. 1  | 192  | 0. 29776 | 9. 831848145 | 1  |
| MSTRG. 26942. 3  | 159  | 0. 30496 | 5. 08001709  | 1  |
| MSTRG. 26945. 1  | 756  | 0. 44679 | 6. 273254395 | 1  |
| MSTRG. 26944. 11 | 287  | 0. 32573 | 5. 910217285 | 1  |
| MSTRG. 26953. 3  | 164  | 0. 30918 | 5. 489685059 | 1  |
| MSTRG. 26953. 2  | 461  | 0. 33914 | 6. 256164551 | 1  |
| MSTRG. 26954. 1  | 86   | 0. 28529 | 8. 684509277 | 1  |
| MSTRG. 26955. 2  | 572  | 0. 43966 | 5. 65020752  | 1  |
| MSTRG. 26955. 1  | 646  | 0. 43196 | 5. 64263916  | 1  |
| MSTRG. 26955. 3  | 359  | 0. 44038 | 5. 639587402 | 1  |
| MSTRG. 26955. 5  | 636  | 0. 43274 | 5. 898986816 | -1 |
| MSTRG. 26957. 1  | 141  | 0. 27188 | 8. 034973145 | 1  |
| MSTRG. 26962. 1  | 35   | 0. 38604 | 9. 79473877  | 1  |
| MSTRG. 26974. 1  | 1313 | 0. 43    | 6. 922058105 | 1  |
| MSTRG. 26988. 1  | 232  | 0. 36161 | 9. 928161621 | 1  |
| MSTRG. 26988. 2  | 46   | 0. 34696 | 5. 045715332 | 1  |
| MSTRG. 26990. 1  | 380  | 0. 34037 | 9. 363342285 | 1  |
| MSTRG. 26990. 2  | 303  | 0. 29999 | 9. 574890137 | 1  |
| MSTRG. 26990. 3  | 419  | 0. 33638 | 9. 202087402 | 1  |
| MSTRG. 26994. 1  | 104  | 0. 33313 | 6. 379455566 | 1  |
| MSTRG. 26990. 4  | 475  | 0. 37874 | 9. 184265137 | 1  |
| MSTRG. 26990. 6  | 112  | 0. 42217 | 4. 491149902 | 1  |
| MSTRG. 26990. 5  | 450  | 0. 33533 | 9. 055358887 | 1  |
| MSTRG. 26997. 1  | 366  | 0. 42728 | 5. 458190918 | -1 |
| MSTRG. 26998. 1  | 56   | 0. 4627  | 10. 73675537 | 1  |
| MSTRG. 27003. 4  | 434  | 0. 41776 | 6. 316345215 | 1  |
| MSTRG. 27006. 6  | 238  | 0. 47449 | 4. 865783691 | 1  |
| MSTRG. 27006. 8  | 225  | 0. 46462 | 4. 915100098 | 1  |
| MSTRG. 27006. 9  | 225  | 0. 47341 | 4. 915100098 | 1  |
| MSTRG. 27006. 7  | 225  | 0. 46207 | 4. 915100098 | 1  |
| MSTRG. 27006. 5  | 451  | 0. 46806 | 5. 413635254 | 1  |
| MSTRG. 27006. 4  | 499  | 0. 44346 | 5. 014831543 | 1  |
| MSTRG. 27006. 2  | 1274 | 0. 47642 | 5. 777282715 | 1  |
| MSTRG. 27007. 1  | 136  | 0. 29751 | 5. 565490723 | 1  |
| MSTRG. 27008. 1  | 57   | 0. 33766 | 4. 860900879 | 1  |
| MSTRG. 27011. 1  | 56   | 0. 39164 | 9. 296447754 | 1  |
| MSTRG. 27002. 4  | 526  | 0. 41598 | 5. 312561035 | 1  |
| MSTRG. 27014. 1  | 187  | 0. 28036 | 9. 504455566 | 1  |
| MSTRG. 27017. 6  | 134  | 0. 29059 | 6. 88848877  | 1  |
| MSTRG. 27017. 5  | 134  | 0. 33112 | 6. 88848877  | 1  |
| MSTRG. 27017. 7  | 1463 | 0. 43971 | 10. 07635498 | 1  |
| MSTRG. 27018. 1  | 99   | 0. 30152 | 9. 351257324 | -1 |
| MSTRG. 27017. 9  | 1239 | 0. 40618 | 10. 03179932 | 1  |
| MSTRG. 27017. 10 | 47   | 0. 33996 | 6. 022888184 | 1  |
| MSTRG. 27017. 11 | 47   | 0. 33285 | 6. 022888184 | 1  |

|                  |      |          |              |    |
|------------------|------|----------|--------------|----|
| MSTRG. 27012. 3  | 709  | 0. 39343 | 6. 410217285 | 1  |
| MSTRG. 27012. 2  | 747  | 0. 39591 | 5. 378723145 | 1  |
| MSTRG. 27019. 2  | 81   | 0. 46079 | 7. 886535645 | -1 |
| MSTRG. 27021. 2  | 93   | 0. 35766 | 9. 570983887 | 1  |
| MSTRG. 27023. 1  | 50   | 0. 3331  | 6. 883117676 | 1  |
| MSTRG. 27027. 1  | 32   | 0. 39728 | 11. 69903564 | 1  |
| MSTRG. 27027. 2  | 50   | 0. 39716 | 8. 940856934 | 1  |
| MSTRG. 27029. 1  | 103  | 0. 45827 | 9. 390563965 | 1  |
| MSTRG. 27031. 2  | 580  | 0. 44395 | 8. 70880127  | 1  |
| MSTRG. 27035. 4  | 94   | 0. 32494 | 9. 828308105 | 1  |
| MSTRG. 27035. 6  | 94   | 0. 37824 | 9. 828308105 | 1  |
| MSTRG. 27035. 3  | 660  | 0. 4615  | 6. 882141113 | 1  |
| MSTRG. 27035. 5  | 660  | 0. 46683 | 6. 882141113 | 1  |
| MSTRG. 27035. 7  | 58   | 0. 35312 | 9. 347595215 | 1  |
| MSTRG. 27038. 2  | 203  | 0. 38539 | 7. 731628418 | 1  |
| MSTRG. 27038. 3  | 139  | 0. 35416 | 9. 242858887 | 1  |
| MSTRG. 27038. 4  | 111  | 0. 34455 | 5. 20123291  | 1  |
| MSTRG. 27038. 5  | 196  | 0. 35676 | 6. 41595459  | 1  |
| MSTRG. 27039. 1  | 43   | 0. 35229 | 6. 383117676 | 1  |
| MSTRG. 27039. 2  | 33   | 0. 42024 | 9. 099182129 | 1  |
| MSTRG. 27069. 1  | 108  | 0. 30556 | 9. 171081543 | 1  |
| MSTRG. 27069. 2  | 112  | 0. 29367 | 5. 936096191 | 1  |
| MSTRG. 27069. 3  | 73   | 0. 28432 | 9. 063049316 | 1  |
| MSTRG. 27042. 2  | 221  | 0. 32442 | 6. 789489746 | 1  |
| MSTRG. 27043. 1  | 201  | 0. 36195 | 9. 908630371 | 1  |
| MSTRG. 27045. 4  | 535  | 0. 3331  | 8. 936462402 | 1  |
| MSTRG. 27045. 5  | 535  | 0. 35545 | 8. 936462402 | 1  |
| MSTRG. 27045. 6  | 535  | 0. 39128 | 8. 936462402 | 1  |
| MSTRG. 27045. 7  | 535  | 0. 39314 | 8. 936462402 | 1  |
| MSTRG. 27045. 8  | 593  | 0. 3954  | 8. 898132324 | 1  |
| MSTRG. 27073. 2  | 1319 | 0. 46012 | 5. 663391113 | 1  |
| MSTRG. 27073. 5  | 1031 | 0. 46097 | 5. 351745605 | 1  |
| MSTRG. 27073. 6  | 1031 | 0. 44791 | 5. 351745605 | 1  |
| MSTRG. 27073. 7  | 1256 | 0. 46245 | 5. 739440918 | 1  |
| MSTRG. 27073. 8  | 923  | 0. 46282 | 5. 299865723 | 1  |
| MSTRG. 27073. 9  | 1023 | 0. 4788  | 5. 351745605 | 1  |
| MSTRG. 27051. 1  | 35   | 0. 35241 | 9. 382385254 | 1  |
| MSTRG. 27078. 1  | 78   | 0. 28622 | 9. 233703613 | 1  |
| MSTRG. 27083. 2  | 71   | 0. 30594 | 10. 97650146 | 1  |
| MSTRG. 27083. 3  | 71   | 0. 31061 | 10. 97650146 | 1  |
| MSTRG. 27085. 4  | 1307 | 0. 46415 | 5. 666931152 | 1  |
| MSTRG. 27086. 2  | 156  | 0. 46599 | 4. 612854004 | 1  |
| MSTRG. 27098. 1  | 237  | 0. 45893 | 8. 575866699 | 1  |
| MSTRG. 27098. 2  | 237  | 0. 45844 | 8. 575866699 | 1  |
| MSTRG. 27098. 3  | 237  | 0. 46168 | 8. 575866699 | 1  |
| MSTRG. 27099. 1  | 43   | 0. 4035  | 11. 48028564 | -1 |
| MSTRG. 27099. 2  | 43   | 0. 43537 | 11. 48028564 | -1 |
| MSTRG. 27101. 3  | 462  | 0. 38348 | 6. 186462402 | 1  |
| MSTRG. 27101. 2  | 789  | 0. 47895 | 6. 821105957 | 1  |
| MSTRG. 27101. 1  | 699  | 0. 38757 | 6. 769714355 | 1  |
| MSTRG. 27101. 4  | 806  | 0. 46552 | 7. 326965332 | 1  |
| MSTRG. 27101. 5  | 694  | 0. 38977 | 6. 652893066 | 1  |
| MSTRG. 27101. 10 | 360  | 0. 44691 | 9. 039733887 | 1  |
| MSTRG. 27101. 11 | 360  | 0. 4806  | 9. 039733887 | 1  |

|                  |      |          |              |    |
|------------------|------|----------|--------------|----|
| MSTRG. 27101. 12 | 788  | 0. 47533 | 6. 821105957 | 1  |
| MSTRG. 27101. 8  | 447  | 0. 406   | 6. 551208496 | 1  |
| MSTRG. 27101. 14 | 359  | 0. 31772 | 8. 979919434 | 1  |
| MSTRG. 27101. 16 | 801  | 0. 47005 | 7. 121154785 | 1  |
| MSTRG. 27103. 1  | 79   | 0. 43874 | 6. 006774902 | 1  |
| MSTRG. 27104. 1  | 432  | 0. 46215 | 5. 90423584  | 1  |
| MSTRG. 27104. 2  | 432  | 0. 47278 | 5. 90423584  | 1  |
| MSTRG. 27104. 3  | 432  | 0. 45228 | 5. 90423584  | 1  |
| MSTRG. 27104. 4  | 432  | 0. 45583 | 5. 90423584  | 1  |
| MSTRG. 27104. 5  | 432  | 0. 45192 | 5. 90423584  | 1  |
| MSTRG. 27104. 6  | 432  | 0. 43043 | 5. 90423584  | 1  |
| MSTRG. 27101. 17 | 104  | 0. 35967 | 11. 90435791 | 1  |
| MSTRG. 27091. 2  | 347  | 0. 41963 | 8. 702941895 | 1  |
| MSTRG. 27092. 1  | 103  | 0. 38976 | 6. 553527832 | 1  |
| MSTRG. 27092. 2  | 177  | 0. 32283 | 11. 85736084 | 1  |
| MSTRG. 27092. 3  | 103  | 0. 36686 | 6. 553527832 | 1  |
| MSTRG. 27092. 4  | 103  | 0. 37301 | 6. 553527832 | 1  |
| MSTRG. 27092. 5  | 165  | 0. 30906 | 7. 789245605 | 1  |
| MSTRG. 27092. 6  | 103  | 0. 35248 | 6. 553527832 | 1  |
| MSTRG. 27094. 1  | 150  | 0. 4668  | 7. 04107666  | -1 |
| MSTRG. 27092. 7  | 165  | 0. 28242 | 7. 789245605 | 1  |
| MSTRG. 27114. 1  | 1328 | 0. 38277 | 9. 055725098 | 1  |
| MSTRG. 27118. 1  | 246  | 0. 38605 | 7. 049133301 | -1 |
| MSTRG. 27118. 2  | 64   | 0. 30132 | 6. 520690918 | 1  |
| MSTRG. 27119. 1  | 216  | 0. 29772 | 9. 738220215 | 1  |
| MSTRG. 27119. 2  | 160  | 0. 29772 | 10. 34588623 | -1 |
| MSTRG. 27118. 3  | 445  | 0. 42353 | 8. 961120605 | 1  |
| MSTRG. 27118. 4  | 445  | 0. 29526 | 8. 961120605 | 1  |
| MSTRG. 27123. 1  | 117  | 0. 29476 | 5. 986633301 | 1  |
| MSTRG. 27124. 2  | 545  | 0. 46466 | 7. 914123535 | 1  |
| MSTRG. 27124. 5  | 140  | 0. 2785  | 9. 340881348 | 1  |
| MSTRG. 27125. 1  | 123  | 0. 28887 | 8. 723083496 | 1  |
| MSTRG. 27124. 6  | 738  | 0. 35483 | 5. 594299316 | 1  |
| MSTRG. 27124. 7  | 142  | 0. 27437 | 6. 696594238 | 1  |
| MSTRG. 27106. 1  | 244  | 0. 2782  | 8. 112365723 | 1  |
| MSTRG. 27109. 1  | 375  | 0. 29827 | 8. 53326416  | 1  |
| MSTRG. 27129. 1  | 37   | 0. 3151  | 5. 221862793 | 1  |
| MSTRG. 27143. 1  | 35   | 0. 42317 | 7. 847106934 | 1  |
| MSTRG. 27144. 1  | 71   | 0. 31225 | 9. 696838379 | 1  |
| MSTRG. 27150. 1  | 112  | 0. 27587 | 8. 986022949 | 1  |
| MSTRG. 27156. 1  | 112  | 0. 40156 | 8. 753234863 | -1 |
| MSTRG. 27157. 2  | 114  | 0. 37023 | 4. 974182129 | 1  |
| MSTRG. 27179. 1  | 101  | 0. 26182 | 9. 22454834  | 1  |
| MSTRG. 27191. 1  | 412  | 0. 36746 | 6. 116516113 | 1  |
| MSTRG. 27192. 1  | 142  | 0. 32213 | 9. 097351074 | 1  |
| MSTRG. 27192. 3  | 434  | 0. 40742 | 7. 180969238 | 1  |
| MSTRG. 27192. 2  | 434  | 0. 42175 | 7. 180969238 | 1  |
| MSTRG. 27194. 1  | 76   | 0. 30344 | 9. 647277832 | 1  |
| MSTRG. 27198. 1  | 430  | 0. 47631 | 5. 418395996 | 1  |
| MSTRG. 27202. 5  | 1155 | 0. 41142 | 5. 193664551 | 1  |
| MSTRG. 27217. 1  | 65   | 0. 33899 | 6. 237731934 | 1  |
| MSTRG. 27217. 2  | 65   | 0. 35591 | 6. 237731934 | 1  |
| MSTRG. 27212. 1  | 63   | 0. 36508 | 10. 44085693 | 1  |
| MSTRG. 27221. 2  | 315  | 0. 31942 | 8. 625427246 | 1  |

|                  |     |          |              |   |
|------------------|-----|----------|--------------|---|
| MSTRG. 27222. 1  | 84  | 0. 29772 | 10. 30743408 | 1 |
| MSTRG. 27223. 1  | 80  | 0. 34727 | 4. 749694824 | 1 |
| MSTRG. 27226. 1  | 372 | 0. 43907 | 4. 69342041  | 1 |
| MSTRG. 27226. 4  | 356 | 0. 45419 | 4. 407287598 | 1 |
| MSTRG. 27226. 5  | 374 | 0. 47619 | 4. 46270752  | 1 |
| MSTRG. 27230. 2  | 192 | 0. 36305 | 4. 609191895 | 1 |
| MSTRG. 27230. 4  | 39  | 0. 35705 | 5. 302185059 | 1 |
| MSTRG. 27230. 9  | 152 | 0. 28923 | 9. 796569824 | 1 |
| MSTRG. 27230. 16 | 183 | 0. 28186 | 10. 44781494 | 1 |
| MSTRG. 27230. 17 | 81  | 0. 30132 | 9. 152160645 | 1 |
| MSTRG. 27239. 1  | 102 | 0. 28466 | 9. 43951416  | 1 |
| MSTRG. 27239. 2  | 43  | 0. 29194 | 6. 807189941 | 1 |
| MSTRG. 27282. 1  | 85  | 0. 29654 | 6. 823913574 | 1 |
| MSTRG. 27282. 3  | 157 | 0. 28243 | 6. 998840332 | 1 |
| MSTRG. 27282. 11 | 125 | 0. 32511 | 10. 690979   | 1 |
| MSTRG. 27282. 10 | 125 | 0. 28419 | 10. 690979   | 1 |
| MSTRG. 27282. 12 | 105 | 0. 28584 | 8. 735900879 | 1 |
| MSTRG. 27282. 14 | 101 | 0. 30289 | 6. 722839355 | 1 |
| MSTRG. 27282. 15 | 95  | 0. 29772 | 6. 62677002  | 1 |
| MSTRG. 27285. 1  | 340 | 0. 28982 | 9. 523010254 | 1 |
| MSTRG. 27282. 16 | 63  | 0. 37038 | 9. 185241699 | 1 |
| MSTRG. 27282. 20 | 146 | 0. 30668 | 8. 408996582 | 1 |
| MSTRG. 27282. 21 | 157 | 0. 28931 | 6. 998840332 | 1 |
| MSTRG. 27282. 18 | 157 | 0. 33091 | 6. 998840332 | 1 |
| MSTRG. 27288. 1  | 75  | 0. 40329 | 9. 922790527 | 1 |
| MSTRG. 27291. 1  | 507 | 0. 36461 | 8. 162658691 | 1 |
| MSTRG. 27291. 2  | 90  | 0. 33194 | 10. 50531006 | 1 |
| MSTRG. 27292. 1  | 141 | 0. 30972 | 5. 698059082 | 1 |
| MSTRG. 27293. 1  | 85  | 0. 33996 | 5. 988586426 | 1 |
| MSTRG. 27291. 7  | 409 | 0. 37218 | 8. 227355957 | 1 |
| MSTRG. 27291. 8  | 408 | 0. 37218 | 8. 227355957 | 1 |
| MSTRG. 27247. 3  | 123 | 0. 45589 | 9. 644836426 | 1 |
| MSTRG. 27247. 2  | 123 | 0. 44097 | 9. 644836426 | 1 |
| MSTRG. 27248. 1  | 446 | 0. 48833 | 5. 401062012 | 1 |
| MSTRG. 27250. 1  | 183 | 0. 38395 | 9. 61932373  | 1 |
| MSTRG. 27251. 1  | 527 | 0. 40461 | 6. 866027832 | 1 |
| MSTRG. 27255. 2  | 384 | 0. 45124 | 5. 321716309 | 1 |
| MSTRG. 27256. 1  | 148 | 0. 36826 | 11. 00323486 | 1 |
| MSTRG. 27263. 1  | 77  | 0. 36957 | 9. 380554199 | 1 |
| MSTRG. 27264. 1  | 125 | 0. 36597 | 10. 42608643 | 1 |
| MSTRG. 27263. 2  | 60  | 0. 38204 | 4. 246520996 | 1 |
| MSTRG. 27263. 3  | 829 | 0. 42944 | 6. 097961426 | 1 |
| MSTRG. 27268. 1  | 163 | 0. 36019 | 9. 638244629 | 1 |
| MSTRG. 27272. 1  | 50  | 0. 323   | 6. 015319824 | 1 |
| MSTRG. 27276. 1  | 100 | 0. 31193 | 9. 619934082 | 1 |
| MSTRG. 27275. 2  | 175 | 0. 32244 | 9. 218322754 | 1 |
| MSTRG. 27304. 3  | 177 | 0. 322   | 8. 657653809 | 1 |
| MSTRG. 27305. 1  | 221 | 0. 28883 | 9. 822570801 | 1 |
| MSTRG. 27305. 2  | 110 | 0. 29387 | 9. 77557373  | 1 |
| MSTRG. 27305. 3  | 130 | 0. 28982 | 9. 363098145 | 1 |
| MSTRG. 27305. 4  | 130 | 0. 28982 | 9. 363098145 | 1 |
| MSTRG. 27305. 5  | 130 | 0. 29387 | 9. 363098145 | 1 |
| MSTRG. 27305. 6  | 108 | 0. 27433 | 9. 943786621 | 1 |
| MSTRG. 27304. 6  | 85  | 0. 30191 | 6. 552307129 | 1 |

|                  |      |          |              |    |
|------------------|------|----------|--------------|----|
| MSTRG. 27304. 7  | 98   | 0. 29387 | 7. 605407715 | 1  |
| MSTRG. 27304. 8  | 187  | 0. 27937 | 10. 77044678 | 1  |
| MSTRG. 27304. 9  | 187  | 0. 28982 | 10. 77044678 | 1  |
| MSTRG. 27304. 10 | 1244 | 0. 38122 | 6. 772399902 | 1  |
| MSTRG. 27304. 11 | 1255 | 0. 29772 | 6. 872253418 | 1  |
| MSTRG. 27304. 12 | 73   | 0. 2857  | 6. 507385254 | 1  |
| MSTRG. 27307. 1  | 93   | 0. 30839 | 6. 944152832 | 1  |
| MSTRG. 27304. 13 | 243  | 0. 34952 | 10. 49517822 | 1  |
| MSTRG. 27308. 1  | 150  | 0. 28982 | 6. 918273926 | 1  |
| MSTRG. 27308. 2  | 150  | 0. 28199 | 6. 918273926 | 1  |
| MSTRG. 27304. 14 | 82   | 0. 3453  | 9. 217712402 | 1  |
| MSTRG. 27309. 1  | 152  | 0. 26413 | 11. 42547607 | 1  |
| MSTRG. 27309. 2  | 189  | 0. 28706 | 9. 780822754 | 1  |
| MSTRG. 27310. 1  | 40   | 0. 38847 | 8. 634094238 | 1  |
| MSTRG. 27311. 1  | 67   | 0. 36288 | 9. 817565918 | -1 |
| MSTRG. 27277. 1  | 68   | 0. 42677 | 6. 815246582 | 1  |
| MSTRG. 27278. 1  | 109  | 0. 31505 | 8. 24798584  | 1  |
| MSTRG. 27300. 3  | 921  | 0. 36633 | 7. 11907959  | 1  |
| MSTRG. 27300. 4  | 1521 | 0. 41877 | 7. 276672363 | 1  |
| MSTRG. 27300. 5  | 1937 | 0. 41378 | 7. 675476074 | 1  |
| MSTRG. 27302. 1  | 56   | 0. 36064 | 6. 508361816 | 1  |
| MSTRG. 27303. 5  | 124  | 0. 2895  | 9. 72467041  | 1  |
| MSTRG. 27312. 1  | 340  | 0. 50906 | 5. 757385254 | 1  |
| MSTRG. 27314. 2  | 854  | 0. 34888 | 9. 745178223 | 1  |
| MSTRG. 27314. 3  | 14   | 0. 38695 | 11. 71136475 | 1  |
| MSTRG. 27329. 1  | 101  | 0. 29268 | 7. 063781738 | 1  |
| MSTRG. 27329. 2  | 68   | 0. 35739 | 10. 33258057 | 1  |
| MSTRG. 27328. 4  | 90   | 0. 31797 | 9. 69354248  | 1  |
| MSTRG. 27330. 1  | 77   | 0. 32485 | 6. 07598877  | 1  |
| MSTRG. 27368. 2  | 54   | 0. 38977 | 6. 687072754 | 1  |
| MSTRG. 27368. 3  | 42   | 0. 47507 | 11. 73394775 | 1  |
| MSTRG. 27368. 4  | 249  | 0. 29387 | 9. 275695801 | 1  |
| MSTRG. 27368. 5  | 149  | 0. 38007 | 6. 43939209  | 1  |
| MSTRG. 27368. 6  | 95   | 0. 31852 | 4. 248352051 | 1  |
| MSTRG. 27370. 1  | 91   | 0. 29771 | 6. 250183105 | 1  |
| MSTRG. 27368. 7  | 141  | 0. 3     | 8. 942443848 | 1  |
| MSTRG. 27373. 1  | 398  | 0. 31292 | 9. 847717285 | 1  |
| MSTRG. 27337. 1  | 38   | 0. 38695 | 5. 967712402 | -1 |
| MSTRG. 27338. 3  | 598  | 0. 44289 | 5. 175231934 | 1  |
| MSTRG. 27338. 4  | 687  | 0. 43421 | 5. 264343262 | 1  |
| MSTRG. 27339. 1  | 50   | 0. 25989 | 4. 218811035 | 1  |
| MSTRG. 27340. 1  | 146  | 0. 31553 | 9. 113586426 | 1  |
| MSTRG. 27343. 3  | 159  | 0. 29456 | 8. 077331543 | 1  |
| MSTRG. 27343. 4  | 184  | 0. 28588 | 10. 32550049 | 1  |
| MSTRG. 27343. 6  | 144  | 0. 33217 | 9. 987854004 | 1  |
| MSTRG. 27343. 8  | 181  | 0. 28823 | 10. 42987061 | 1  |
| MSTRG. 27359. 4  | 272  | 0. 39264 | 5. 370910645 | 1  |
| MSTRG. 27362. 3  | 337  | 0. 40905 | 9. 029724121 | 1  |
| MSTRG. 27391. 4  | 318  | 0. 31902 | 5. 158752441 | 1  |
| MSTRG. 27391. 2  | 359  | 0. 40905 | 5. 11895752  | 1  |
| MSTRG. 27391. 7  | 710  | 0. 45089 | 5. 055480957 | 1  |
| MSTRG. 27391. 8  | 318  | 0. 42955 | 5. 158752441 | 1  |
| MSTRG. 27391. 10 | 693  | 0. 47524 | 5. 023742676 | 1  |
| MSTRG. 27391. 9  | 787  | 0. 45681 | 5. 19708252  | 1  |

|                  |      |          |              |    |
|------------------|------|----------|--------------|----|
| MSTRG. 27393. 3  | 120  | 0. 37241 | 4. 847473145 | 1  |
| MSTRG. 27393. 4  | 235  | 0. 32709 | 9. 414855957 | 1  |
| MSTRG. 27400. 3  | 3164 | 0. 46484 | 5. 829406738 | 1  |
| MSTRG. 27400. 4  | 1093 | 0. 49096 | 5. 669250488 | 1  |
| MSTRG. 27401. 1  | 708  | 0. 48722 | 5. 250427246 | 1  |
| MSTRG. 27401. 2  | 708  | 0. 44543 | 5. 250427246 | 1  |
| MSTRG. 27401. 3  | 708  | 0. 43842 | 5. 250427246 | 1  |
| MSTRG. 27401. 4  | 672  | 0. 36188 | 5. 488708496 | 1  |
| MSTRG. 27404. 1  | 175  | 0. 28567 | 8. 536804199 | 1  |
| MSTRG. 27411. 2  | 91   | 0. 29772 | 5. 573913574 | 1  |
| MSTRG. 27412. 1  | 114  | 0. 31634 | 10. 43707275 | 1  |
| MSTRG. 27411. 3  | 527  | 0. 39683 | 6. 124694824 | 1  |
| MSTRG. 27413. 1  | 92   | 0. 27433 | 9. 46270752  | 1  |
| MSTRG. 27413. 2  | 135  | 0. 28584 | 7. 56048584  | 1  |
| MSTRG. 27413. 3  | 135  | 0. 30894 | 7. 56048584  | 1  |
| MSTRG. 27411. 5  | 459  | 0. 33514 | 5. 51385498  | 1  |
| MSTRG. 27378. 6  | 196  | 0. 43589 | 4. 648376465 | 1  |
| MSTRG. 27378. 7  | 792  | 0. 46389 | 5. 753967285 | 1  |
| MSTRG. 27378. 8  | 733  | 0. 30209 | 5. 066589355 | 1  |
| MSTRG. 27378. 9  | 227  | 0. 28467 | 4. 31829834  | 1  |
| MSTRG. 27387. 1  | 33   | 0. 45177 | 5. 464904785 | 1  |
| MSTRG. 27387. 2  | 23   | 0. 36568 | 3. 929626465 | 1  |
| MSTRG. 27387. 3  | 23   | 0. 40876 | 5. 38067627  | 1  |
| MSTRG. 27387. 4  | 18   | 0. 42764 | 4. 501037598 | 1  |
| MSTRG. 27387. 5  | 18   | 0. 46397 | 4. 501037598 | 1  |
| MSTRG. 27387. 6  | 18   | 0. 42973 | 4. 501037598 | 1  |
| MSTRG. 27387. 7  | 204  | 0. 37074 | 9. 12298584  | 1  |
| MSTRG. 27387. 8  | 174  | 0. 42011 | 8. 971008301 | 1  |
| MSTRG. 27387. 9  | 20   | 0. 46231 | 9. 992614746 | 1  |
| MSTRG. 27387. 10 | 18   | 0. 39834 | 4. 501037598 | 1  |
| MSTRG. 27387. 11 | 27   | 0. 42032 | 4. 512512207 | 1  |
| MSTRG. 27420. 1  | 182  | 0. 3823  | 6. 512268066 | 1  |
| MSTRG. 27420. 2  | 604  | 0. 42833 | 5. 55657959  | 1  |
| MSTRG. 27431. 1  | 17   | 0. 33657 | 11. 00030518 | 1  |
| MSTRG. 27435. 3  | 1356 | 0. 43224 | 6. 13873291  | 1  |
| MSTRG. 27436. 1  | 62   | 0. 34952 | 4. 245300293 | -1 |
| MSTRG. 27440. 1  | 45   | 0. 418   | 10. 46392822 | -1 |
| MSTRG. 27427. 9  | 559  | 0. 44374 | 7. 766296387 | 1  |
| MSTRG. 27427. 8  | 674  | 0. 41667 | 8. 08026123  | 1  |
| MSTRG. 27427. 7  | 685  | 0. 41235 | 8. 081359863 | 1  |
| MSTRG. 27427. 10 | 570  | 0. 42949 | 7. 770202637 | 1  |
| MSTRG. 27427. 11 | 561  | 0. 42324 | 7. 974060059 | 1  |
| MSTRG. 27427. 12 | 676  | 0. 42553 | 8. 200622559 | 1  |
| MSTRG. 27427. 13 | 674  | 0. 41397 | 8. 08026123  | 1  |
| MSTRG. 27428. 2  | 73   | 0. 29857 | 11. 90545654 | 1  |
| MSTRG. 27428. 1  | 73   | 0. 36966 | 11. 90545654 | 1  |
| MSTRG. 27428. 3  | 40   | 0. 40024 | 12. 00006104 | 1  |
| MSTRG. 27428. 4  | 109  | 0. 35844 | 11. 70367432 | 1  |
| MSTRG. 27445. 2  | 135  | 0. 33463 | 11. 30377197 | 1  |
| MSTRG. 27446. 1  | 65   | 0. 3     | 9. 162658691 | -1 |
| MSTRG. 27449. 1  | 134  | 0. 31852 | 9. 083190918 | 1  |
| MSTRG. 27454. 3  | 588  | 0. 39969 | 8. 412780762 | 1  |
| MSTRG. 27454. 2  | 588  | 0. 38603 | 8. 412780762 | 1  |
| MSTRG. 27459. 1  | 103  | 0. 32824 | 9. 002380371 | 1  |

|                  |      |          |              |    |
|------------------|------|----------|--------------|----|
| MSTRG. 27459. 2  | 102  | 0. 37423 | 9. 335388184 | 1  |
| MSTRG. 27458. 8  | 401  | 0. 32785 | 9. 540222168 | 1  |
| MSTRG. 27461. 1  | 1633 | 0. 45184 | 6. 429992676 | 1  |
| MSTRG. 27461. 3  | 1581 | 0. 43644 | 6. 440856934 | 1  |
| MSTRG. 27461. 5  | 1688 | 0. 41594 | 6. 480895996 | 1  |
| MSTRG. 27461. 6  | 1633 | 0. 41594 | 6. 429992676 | 1  |
| MSTRG. 27461. 7  | 1549 | 0. 43031 | 6. 240905762 | 1  |
| MSTRG. 27461. 10 | 1677 | 0. 46188 | 6. 520324707 | 1  |
| MSTRG. 27461. 11 | 1599 | 0. 45184 | 6. 68157959  | 1  |
| MSTRG. 27462. 1  | 103  | 0. 38394 | 10. 6227417  | 1  |
| MSTRG. 27462. 2  | 86   | 0. 38734 | 10. 90313721 | 1  |
| MSTRG. 27462. 3  | 88   | 0. 33514 | 10. 87115479 | 1  |
| MSTRG. 27457. 3  | 2524 | 0. 34686 | 5. 999816895 | 1  |
| MSTRG. 27474. 4  | 1500 | 0. 46309 | 5. 120666504 | 1  |
| MSTRG. 27474. 2  | 996  | 0. 3947  | 4. 831726074 | 1  |
| MSTRG. 27474. 6  | 996  | 0. 35164 | 4. 831726074 | 1  |
| MSTRG. 27475. 1  | 117  | 0. 44977 | 3. 981140137 | 1  |
| MSTRG. 27479. 1  | 729  | 0. 46976 | 6. 359802246 | 1  |
| MSTRG. 27480. 2  | 4266 | 0. 42037 | 5. 568786621 | 1  |
| MSTRG. 27480. 1  | 4266 | 0. 42037 | 5. 568786621 | 1  |
| MSTRG. 27480. 4  | 4113 | 0. 42037 | 5. 522399902 | 1  |
| MSTRG. 27480. 5  | 695  | 0. 4635  | 5. 452575684 | 1  |
| MSTRG. 27480. 6  | 4266 | 0. 42037 | 5. 568786621 | 1  |
| MSTRG. 27480. 8  | 1769 | 0. 42037 | 5. 618713379 | 1  |
| MSTRG. 27480. 9  | 2463 | 0. 45727 | 5. 66595459  | 1  |
| MSTRG. 27480. 7  | 4266 | 0. 42037 | 5. 568786621 | 1  |
| MSTRG. 27480. 10 | 523  | 0. 43848 | 5. 93145752  | 1  |
| MSTRG. 27480. 12 | 523  | 0. 43507 | 5. 93145752  | 1  |
| MSTRG. 27463. 1  | 69   | 0. 37722 | 9. 992004395 | -1 |
| MSTRG. 27466. 2  | 415  | 0. 46206 | 5. 102478027 | 1  |
| MSTRG. 27466. 3  | 443  | 0. 43842 | 5. 333435059 | 1  |
| MSTRG. 27466. 4  | 305  | 0. 42485 | 5. 243347168 | 1  |
| MSTRG. 27467. 2  | 251  | 0. 48504 | 7. 75604248  | 1  |
| MSTRG. 27469. 3  | 667  | 0. 4692  | 8. 054138184 | 1  |
| MSTRG. 27471. 2  | 369  | 0. 46492 | 8. 106140137 | 1  |
| MSTRG. 27471. 6  | 283  | 0. 36551 | 8. 856140137 | 1  |
| MSTRG. 27473. 1  | 72   | 0. 37225 | 4. 47857666  | 1  |
| MSTRG. 27471. 7  | 112  | 0. 39176 | 5. 272766113 | 1  |
| MSTRG. 27471. 8  | 134  | 0. 30087 | 9. 011901855 | 1  |
| MSTRG. 27486. 2  | 152  | 0. 4213  | 11. 80792236 | 1  |
| MSTRG. 27486. 3  | 152  | 0. 43794 | 11. 80792236 | 1  |
| MSTRG. 27487. 2  | 659  | 0. 44023 | 6. 100524902 | 1  |
| MSTRG. 27489. 4  | 403  | 0. 38642 | 8. 416320801 | 1  |
| MSTRG. 27489. 5  | 359  | 0. 40155 | 6. 791564941 | 1  |
| MSTRG. 27489. 6  | 40   | 0. 43097 | 9. 984436035 | 1  |
| MSTRG. 27489. 7  | 329  | 0. 41396 | 5. 99786377  | 1  |
| MSTRG. 27483. 1  | 132  | 0. 39265 | 5. 74029541  | 1  |
| MSTRG. 27507. 2  | 242  | 0. 29452 | 9. 470153809 | 1  |
| MSTRG. 27507. 3  | 191  | 0. 399   | 8. 703918457 | 1  |
| MSTRG. 27507. 4  | 167  | 0. 43399 | 8. 239318848 | 1  |
| MSTRG. 27507. 5  | 191  | 0. 44108 | 8. 703918457 | 1  |
| MSTRG. 27507. 7  | 197  | 0. 38143 | 10. 42974854 | 1  |
| MSTRG. 27507. 8  | 197  | 0. 40717 | 10. 42974854 | 1  |
| MSTRG. 27508. 1  | 146  | 0. 39088 | 8. 565002441 | 1  |

|                  |      |          |              |   |
|------------------|------|----------|--------------|---|
| MSTRG. 27510. 1  | 1291 | 0. 34832 | 5. 974182129 | 1 |
| MSTRG. 27512. 12 | 133  | 0. 41901 | 4. 29083252  | 1 |
| MSTRG. 27510. 3  | 1291 | 0. 46079 | 5. 974182129 | 1 |
| MSTRG. 27510. 4  | 1468 | 0. 42369 | 5. 757751465 | 1 |
| MSTRG. 27510. 5  | 1291 | 0. 39505 | 5. 974182129 | 1 |
| MSTRG. 27510. 6  | 99   | 0. 31917 | 9. 853210449 | 1 |
| MSTRG. 27514. 1  | 1507 | 0. 4589  | 4. 926574707 | 1 |
| MSTRG. 27514. 2  | 1507 | 0. 48095 | 4. 926574707 | 1 |
| MSTRG. 27515. 1  | 116  | 0. 34481 | 11. 36932373 | 1 |
| MSTRG. 27521. 1  | 2013 | 0. 4593  | 6. 727844238 | 1 |
| MSTRG. 27521. 2  | 2053 | 0. 45406 | 6. 629089355 | 1 |
| MSTRG. 27521. 3  | 2018 | 0. 45654 | 6. 902038574 | 1 |
| MSTRG. 27524. 2  | 384  | 0. 41316 | 7. 576599121 | 1 |
| MSTRG. 27526. 1  | 390  | 0. 41308 | 5. 373840332 | 1 |
| MSTRG. 27526. 4  | 251  | 0. 41719 | 5. 003845215 | 1 |
| MSTRG. 27497. 1  | 439  | 0. 43654 | 5. 96295166  | 1 |
| MSTRG. 27499. 2  | 470  | 0. 39495 | 6. 742980957 | 1 |
| MSTRG. 27499. 4  | 472  | 0. 37894 | 7. 066833496 | 1 |
| MSTRG. 27505. 1  | 1138 | 0. 43    | 5. 929260254 | 1 |
| MSTRG. 27505. 5  | 333  | 0. 29751 | 9. 361999512 | 1 |
| MSTRG. 27502. 1  | 965  | 0. 47661 | 6. 197570801 | 1 |
| MSTRG. 27533. 4  | 441  | 0. 43137 | 6. 81451416  | 1 |
| MSTRG. 27540. 1  | 119  | 0. 29901 | 9. 47845459  | 1 |
| MSTRG. 27572. 2  | 193  | 0. 39204 | 5. 760314941 | 1 |
| MSTRG. 27573. 4  | 82   | 0. 27313 | 5. 004699707 | 1 |
| MSTRG. 27573. 3  | 82   | 0. 30468 | 5. 004699707 | 1 |
| MSTRG. 27573. 2  | 70   | 0. 37049 | 8. 249084473 | 1 |
| MSTRG. 27580. 6  | 597  | 0. 42079 | 8. 832336426 | 1 |
| MSTRG. 27580. 7  | 595  | 0. 4025  | 8. 832336426 | 1 |
| MSTRG. 27580. 8  | 597  | 0. 35993 | 8. 832336426 | 1 |
| MSTRG. 27580. 5  | 597  | 0. 38229 | 8. 832336426 | 1 |
| MSTRG. 27580. 9  | 161  | 0. 27918 | 8. 425720215 | 1 |
| MSTRG. 27581. 3  | 495  | 0. 27327 | 11. 58929443 | 1 |
| MSTRG. 27581. 6  | 183  | 0. 30939 | 9. 08001709  | 1 |
| MSTRG. 27581. 5  | 495  | 0. 28396 | 11. 58929443 | 1 |
| MSTRG. 27584. 1  | 1324 | 0. 45903 | 6. 250061035 | 1 |
| MSTRG. 27584. 10 | 1323 | 0. 45599 | 6. 250061035 | 1 |
| MSTRG. 27584. 11 | 1326 | 0. 45599 | 6. 300476074 | 1 |
| MSTRG. 27584. 9  | 1352 | 0. 47141 | 6. 60748291  | 1 |
| MSTRG. 27584. 12 | 1304 | 0. 43147 | 6. 110290527 | 1 |
| MSTRG. 27584. 13 | 1324 | 0. 46673 | 6. 250061035 | 1 |
| MSTRG. 27584. 14 | 1324 | 0. 46369 | 6. 250061035 | 1 |
| MSTRG. 27584. 15 | 1326 | 0. 47189 | 6. 300476074 | 1 |
| MSTRG. 27587. 3  | 96   | 0. 4128  | 10. 74334717 | 1 |
| MSTRG. 27587. 2  | 184  | 0. 346   | 8. 589294434 | 1 |
| MSTRG. 27588. 4  | 276  | 0. 4429  | 8. 862731934 | 1 |
| MSTRG. 27589. 2  | 1228 | 0. 43056 | 6. 660827637 | 1 |
| MSTRG. 27589. 4  | 265  | 0. 40448 | 6. 170837402 | 1 |
| MSTRG. 27590. 5  | 488  | 0. 41067 | 6. 119812012 | 1 |
| MSTRG. 27541. 1  | 56   | 0. 34479 | 9. 150939941 | 1 |
| MSTRG. 27541. 2  | 87   | 0. 34446 | 6. 042053223 | 1 |
| MSTRG. 27544. 2  | 246  | 0. 47937 | 5. 469299316 | 1 |
| MSTRG. 27544. 3  | 246  | 0. 28338 | 5. 469299316 | 1 |
| MSTRG. 27547. 1  | 2439 | 0. 37473 | 5. 902526855 | 1 |



|                  |      |          |              |    |
|------------------|------|----------|--------------|----|
| MSTRG. 27548. 2  | 742  | 0. 43768 | 8. 687438965 | 1  |
| MSTRG. 27550. 1  | 43   | 0. 33425 | 6. 697570801 | -1 |
| MSTRG. 27554. 1  | 62   | 0. 34372 | 7. 816223145 | 1  |
| MSTRG. 27555. 1  | 89   | 0. 32203 | 7. 855651855 | 1  |
| MSTRG. 27555. 2  | 71   | 0. 40057 | 10. 01629639 | 1  |
| MSTRG. 27555. 3  | 71   | 0. 39753 | 10. 01629639 | 1  |
| MSTRG. 27556. 1  | 187  | 0. 36219 | 4. 93536377  | 1  |
| MSTRG. 27557. 1  | 874  | 0. 47223 | 7. 05267334  | 1  |
| MSTRG. 27558. 2  | 2135 | 0. 46225 | 5. 379211426 | 1  |
| MSTRG. 27559. 4  | 141  | 0. 41108 | 7. 019836426 | 1  |
| MSTRG. 27559. 5  | 141  | 0. 37095 | 7. 019836426 | 1  |
| MSTRG. 27560. 1  | 126  | 0. 33867 | 9. 574035645 | 1  |
| MSTRG. 27563. 1  | 1753 | 0. 46099 | 4. 844665527 | 1  |
| MSTRG. 27563. 10 | 109  | 0. 33686 | 9. 254699707 | 1  |
| MSTRG. 27563. 9  | 1761 | 0. 40301 | 4. 815979004 | 1  |
| MSTRG. 27563. 6  | 1098 | 0. 31929 | 4. 929016113 | 1  |
| MSTRG. 27563. 7  | 1097 | 0. 45496 | 4. 929016113 | 1  |
| MSTRG. 27563. 8  | 990  | 0. 46931 | 5. 110534668 | 1  |
| MSTRG. 27563. 11 | 1098 | 0. 4198  | 4. 929016113 | 1  |
| MSTRG. 27563. 12 | 1097 | 0. 36699 | 4. 929016113 | 1  |
| MSTRG. 27563. 13 | 1074 | 0. 45669 | 4. 93939209  | 1  |
| MSTRG. 27563. 14 | 23   | 0. 3633  | 5. 949157715 | 1  |
| MSTRG. 27563. 15 | 1097 | 0. 42899 | 4. 929016113 | 1  |
| MSTRG. 27565. 1  | 289  | 0. 3505  | 9. 114807129 | 1  |
| MSTRG. 27563. 16 | 1059 | 0. 47799 | 4. 835388184 | 1  |
| MSTRG. 27563. 17 | 1049 | 0. 38734 | 5. 151428223 | 1  |
| MSTRG. 27567. 5  | 1035 | 0. 45072 | 8. 035339355 | 1  |
| MSTRG. 27567. 6  | 1155 | 0. 44212 | 8. 756774902 | 1  |
| MSTRG. 27569. 2  | 996  | 0. 45945 | 5. 292785645 | 1  |
| MSTRG. 27596. 1  | 1278 | 0. 42012 | 6. 69317627  | 1  |
| MSTRG. 27596. 3  | 1278 | 0. 41139 | 6. 69317627  | 1  |
| MSTRG. 27596. 4  | 1279 | 0. 41139 | 6. 783508301 | 1  |
| MSTRG. 27597. 2  | 79   | 0. 28571 | 10. 45843506 | -1 |
| MSTRG. 27617. 2  | 295  | 0. 46682 | 8. 257019043 | 1  |
| MSTRG. 27617. 3  | 247  | 0. 43575 | 7. 71685791  | 1  |
| MSTRG. 27617. 4  | 247  | 0. 44445 | 7. 71685791  | 1  |
| MSTRG. 27620. 8  | 521  | 0. 33111 | 9. 682067871 | 1  |
| MSTRG. 27620. 2  | 1615 | 0. 45274 | 5. 504821777 | 1  |
| MSTRG. 27620. 3  | 1615 | 0. 46554 | 5. 504821777 | 1  |
| MSTRG. 27620. 4  | 1615 | 0. 43768 | 5. 504821777 | 1  |
| MSTRG. 27620. 5  | 1615 | 0. 43768 | 5. 504821777 | 1  |
| MSTRG. 27620. 6  | 1615 | 0. 45274 | 5. 504821777 | 1  |
| MSTRG. 27620. 7  | 1615 | 0. 45274 | 5. 504821777 | 1  |
| MSTRG. 27620. 9  | 1109 | 0. 39087 | 5. 18572998  | 1  |
| MSTRG. 27620. 10 | 1615 | 0. 39379 | 5. 504821777 | 1  |
| MSTRG. 27620. 11 | 1615 | 0. 46821 | 5. 504821777 | 1  |
| MSTRG. 27620. 12 | 76   | 0. 30532 | 10. 04400635 | -1 |
| MSTRG. 27622. 2  | 1857 | 0. 45298 | 5. 726379395 | 1  |
| MSTRG. 27624. 2  | 85   | 0. 31801 | 7. 707702637 | 1  |
| MSTRG. 27624. 3  | 148  | 0. 26913 | 6. 524230957 | 1  |
| MSTRG. 27598. 2  | 558  | 0. 44687 | 8. 620666504 | 1  |
| MSTRG. 27598. 3  | 584  | 0. 43112 | 8. 27520752  | 1  |
| MSTRG. 27601. 1  | 43   | 0. 4694  | 6. 50567627  | 1  |
| MSTRG. 27602. 1  | 45   | 0. 32402 | 5. 981628418 | 1  |

|                  |      |          |              |    |
|------------------|------|----------|--------------|----|
| MSTRG. 27605. 1  | 99   | 0. 34785 | 5. 102355957 | 1  |
| MSTRG. 27605. 5  | 321  | 0. 40773 | 4. 764221191 | 1  |
| MSTRG. 27605. 2  | 392  | 0. 40525 | 6. 082824707 | 1  |
| MSTRG. 27605. 4  | 321  | 0. 40745 | 4. 764221191 | 1  |
| MSTRG. 27606. 1  | 247  | 0. 35894 | 7. 521179199 | 1  |
| MSTRG. 27599. 2  | 173  | 0. 33163 | 8. 733581543 | 1  |
| MSTRG. 27630. 1  | 108  | 0. 28711 | 11. 31817627 | 1  |
| MSTRG. 27633. 1  | 77   | 0. 45313 | 4. 726013184 | 1  |
| MSTRG. 27626. 1  | 1454 | 0. 45892 | 4. 935974121 | 1  |
| MSTRG. 27626. 2  | 65   | 0. 40504 | 11. 36663818 | -1 |
| MSTRG. 27626. 3  | 98   | 0. 36812 | 9. 872253418 | -1 |
| MSTRG. 27627. 1  | 84   | 0. 32091 | 10. 32659912 | 1  |
| MSTRG. 27628. 1  | 82   | 0. 28518 | 9. 809631348 | 1  |
| MSTRG. 27651. 1  | 543  | 0. 42375 | 5. 711120605 | 1  |
| MSTRG. 27651. 2  | 563  | 0. 43196 | 6. 021057129 | 1  |
| MSTRG. 27651. 3  | 208  | 0. 4738  | 5. 733581543 | 1  |
| MSTRG. 27655. 1  | 236  | 0. 31389 | 6. 51373291  | 1  |
| MSTRG. 27655. 2  | 177  | 0. 34327 | 5. 967834473 | 1  |
| MSTRG. 27666. 2  | 212  | 0. 46197 | 5. 057800293 | 1  |
| MSTRG. 27667. 1  | 109  | 0. 36382 | 6. 627502441 | -1 |
| MSTRG. 27668. 6  | 368  | 0. 37012 | 6. 537658691 | 1  |
| MSTRG. 27668. 7  | 179  | 0. 33073 | 6. 039367676 | 1  |
| MSTRG. 27668. 8  | 299  | 0. 38647 | 8. 540344238 | 1  |
| MSTRG. 27668. 9  | 368  | 0. 39292 | 6. 537658691 | 1  |
| MSTRG. 27668. 10 | 73   | 0. 34201 | 6. 252258301 | 1  |
| MSTRG. 27669. 5  | 87   | 0. 37028 | 8. 857971191 | 1  |
| MSTRG. 27669. 6  | 87   | 0. 36646 | 8. 857971191 | 1  |
| MSTRG. 27669. 7  | 142  | 0. 32888 | 10. 94415283 | 1  |
| MSTRG. 27669. 8  | 84   | 0. 28085 | 9. 381652832 | 1  |
| MSTRG. 27659. 1  | 30   | 0. 39259 | 6. 698547363 | 1  |
| MSTRG. 27673. 1  | 115  | 0. 32646 | 9. 354919434 | 1  |
| MSTRG. 27676. 3  | 703  | 0. 44541 | 5. 813903809 | 1  |
| MSTRG. 27676. 4  | 662  | 0. 46578 | 6. 148620605 | 1  |
| MSTRG. 27676. 6  | 703  | 0. 45361 | 5. 813903809 | 1  |
| MSTRG. 27676. 7  | 703  | 0. 45361 | 5. 813903809 | 1  |
| MSTRG. 27676. 8  | 703  | 0. 44541 | 5. 813903809 | 1  |
| MSTRG. 27676. 10 | 703  | 0. 46207 | 5. 813903809 | 1  |
| MSTRG. 27680. 1  | 652  | 0. 39647 | 6. 201477051 | 1  |
| MSTRG. 27680. 3  | 652  | 0. 39323 | 6. 201477051 | 1  |
| MSTRG. 27680. 5  | 195  | 0. 29155 | 6. 310241699 | 1  |
| MSTRG. 27680. 4  | 652  | 0. 44059 | 6. 201477051 | 1  |
| MSTRG. 27684. 4  | 217  | 0. 47245 | 10. 52264404 | 1  |
| MSTRG. 27684. 3  | 216  | 0. 44812 | 10. 52264404 | 1  |
| MSTRG. 27684. 2  | 312  | 0. 4556  | 10. 90692139 | 1  |
| MSTRG. 27689. 1  | 67   | 0. 38791 | 4. 721618652 | 1  |
| MSTRG. 27690. 2  | 142  | 0. 47533 | 9. 578796387 | -1 |
| MSTRG. 27695. 1  | 405  | 0. 39123 | 7. 162414551 | 1  |
| MSTRG. 27695. 3  | 405  | 0. 41525 | 7. 162414551 | 1  |
| MSTRG. 27704. 1  | 183  | 0. 37116 | 10. 81610107 | 1  |
| MSTRG. 27706. 1  | 49   | 0. 2921  | 10. 19720459 | 1  |
| MSTRG. 27707. 2  | 251  | 0. 33431 | 9. 245788574 | 1  |
| MSTRG. 27707. 1  | 102  | 0. 34254 | 10. 17254639 | 1  |
| MSTRG. 27707. 4  | 152  | 0. 3119  | 7. 610290527 | -1 |
| MSTRG. 27708. 2  | 150  | 0. 43054 | 9. 227111816 | 1  |

|                 |      |          |              |    |
|-----------------|------|----------|--------------|----|
| MSTRG. 27708. 3 | 109  | 0. 42076 | 7. 689880371 | 1  |
| MSTRG. 27717. 5 | 1452 | 0. 46717 | 4. 829772949 | 1  |
| MSTRG. 27717. 1 | 1495 | 0. 46717 | 4. 909973145 | 1  |
| MSTRG. 27717. 2 | 1495 | 0. 46258 | 4. 909973145 | 1  |
| MSTRG. 27720. 1 | 65   | 0. 39048 | 6. 877868652 | 1  |
| MSTRG. 27722. 1 | 70   | 0. 32121 | 8. 769104004 | 1  |
| MSTRG. 27718. 2 | 476  | 0. 45703 | 9. 243347168 | 1  |
| MSTRG. 27719. 1 | 89   | 0. 35178 | 10. 61212158 | 1  |
| MSTRG. 27724. 4 | 620  | 0. 41023 | 6. 97845459  | 1  |
| MSTRG. 27724. 5 | 620  | 0. 37533 | 6. 97845459  | 1  |
| MSTRG. 27730. 2 | 70   | 0. 45129 | 5. 021179199 | 1  |
| MSTRG. 27731. 3 | 691  | 0. 39187 | 9. 516540527 | 1  |
| MSTRG. 27732. 2 | 365  | 0. 41622 | 7. 847839355 | 1  |
| MSTRG. 27725. 1 | 25   | 0. 28895 | 12. 00848389 | 1  |
| MSTRG. 27737. 2 | 1612 | 0. 43484 | 6. 324279785 | 1  |
| MSTRG. 27738. 1 | 72   | 0. 28882 | 7. 806213379 | 1  |
| MSTRG. 27747. 1 | 170  | 0. 38691 | 8. 879577637 | 1  |
| MSTRG. 27747. 2 | 1189 | 0. 45687 | 8. 727233887 | 1  |
| MSTRG. 27747. 3 | 1023 | 0. 41752 | 7. 366394043 | 1  |
| MSTRG. 27747. 4 | 1204 | 0. 43142 | 8. 72442627  | 1  |
| MSTRG. 27748. 1 | 123  | 0. 27194 | 8. 76739502  | 1  |
| MSTRG. 27748. 2 | 148  | 0. 27133 | 11. 3550415  | 1  |
| MSTRG. 27751. 1 | 141  | 0. 38696 | 5. 483337402 | -1 |
| MSTRG. 27747. 5 | 917  | 0. 42829 | 7. 593200684 | 1  |
| MSTRG. 27752. 1 | 27   | 0. 34589 | 12. 00042725 | 1  |
| MSTRG. 27753. 1 | 48   | 0. 37627 | 11. 32647705 | 1  |
| MSTRG. 27747. 6 | 1112 | 0. 45687 | 8. 777038574 | 1  |
| MSTRG. 27747. 8 | 1112 | 0. 4593  | 8. 36932373  | 1  |
| MSTRG. 27754. 1 | 168  | 0. 31051 | 10. 78460693 | 1  |
| MSTRG. 27744. 2 | 555  | 0. 458   | 9. 222595215 | 1  |
| MSTRG. 27745. 1 | 1153 | 0. 45611 | 9. 215270996 | 1  |
| MSTRG. 27745. 3 | 1295 | 0. 46379 | 9. 410949707 | 1  |
| MSTRG. 27769. 1 | 160  | 0. 27327 | 10. 02398682 | 1  |
| MSTRG. 27772. 3 | 312  | 0. 44659 | 8. 032165527 | 1  |
| MSTRG. 27772. 4 | 354  | 0. 43273 | 8. 723815918 | 1  |
| MSTRG. 27772. 6 | 349  | 0. 42127 | 8. 729675293 | 1  |
| MSTRG. 27778. 2 | 118  | 0. 28855 | 6. 99798584  | 1  |
| MSTRG. 27781. 2 | 435  | 0. 43489 | 6. 142272949 | 1  |
| MSTRG. 27755. 1 | 480  | 0. 38052 | 9. 443664551 | 1  |
| MSTRG. 27757. 1 | 231  | 0. 34275 | 6. 45904541  | 1  |
| MSTRG. 27782. 3 | 313  | 0. 35042 | 6. 66619873  | 1  |
| MSTRG. 27783. 1 | 286  | 0. 30491 | 8. 91619873  | 1  |
| MSTRG. 27784. 1 | 328  | 0. 37153 | 4. 784484863 | 1  |
| MSTRG. 27784. 3 | 412  | 0. 37028 | 5. 33392334  | 1  |
| MSTRG. 27784. 2 | 470  | 0. 37808 | 5. 310119629 | 1  |
| MSTRG. 27786. 1 | 902  | 0. 4344  | 5. 426940918 | 1  |
| MSTRG. 27793. 1 | 26   | 0. 38159 | 10. 63983154 | -1 |
| MSTRG. 27794. 1 | 27   | 0. 43496 | 11. 70025635 | -1 |
| MSTRG. 27795. 1 | 210  | 0. 27075 | 5. 56072998  | 1  |
| MSTRG. 27796. 4 | 1797 | 0. 4192  | 6. 785339355 | -1 |
| MSTRG. 27798. 3 | 199  | 0. 37684 | 8. 172790527 | 1  |
| MSTRG. 27800. 1 | 115  | 0. 38254 | 9. 387878418 | 1  |
| MSTRG. 27802. 2 | 459  | 0. 43096 | 6. 527893066 | 1  |
| MSTRG. 27802. 3 | 486  | 0. 4537  | 7. 06829834  | 1  |

|                  |      |          |              |    |
|------------------|------|----------|--------------|----|
| MSTRG. 27802. 4  | 459  | 0. 43985 | 6. 527893066 | 1  |
| MSTRG. 27802. 5  | 486  | 0. 43558 | 7. 06829834  | 1  |
| MSTRG. 27802. 6  | 459  | 0. 36066 | 6. 527893066 | 1  |
| MSTRG. 27804. 2  | 134  | 0. 45075 | 11. 72540283 | 1  |
| MSTRG. 27804. 3  | 88   | 0. 42004 | 11. 57659912 | 1  |
| MSTRG. 27801. 1  | 124  | 0. 32169 | 11. 63812256 | 1  |
| MSTRG. 27801. 2  | 124  | 0. 33101 | 11. 63812256 | 1  |
| MSTRG. 27807. 2  | 591  | 0. 37367 | 6. 515319824 | 1  |
| MSTRG. 27808. 4  | 504  | 0. 3389  | 8. 676940918 | 1  |
| MSTRG. 27810. 2  | 77   | 0. 40792 | 9. 684753418 | -1 |
| MSTRG. 27814. 1  | 588  | 0. 34638 | 6. 204040527 | 1  |
| MSTRG. 27814. 4  | 491  | 0. 29603 | 6. 546691895 | 1  |
| MSTRG. 27814. 5  | 544  | 0. 28029 | 6. 193908691 | 1  |
| MSTRG. 27814. 12 | 302  | 0. 3538  | 6. 18927002  | 1  |
| MSTRG. 27814. 14 | 286  | 0. 30267 | 6. 275695801 | 1  |
| MSTRG. 27818. 1  | 154  | 0. 39366 | 4. 319274902 | 1  |
| MSTRG. 27814. 15 | 72   | 0. 34969 | 6. 718200684 | 1  |
| MSTRG. 27814. 16 | 72   | 0. 34101 | 6. 718200684 | 1  |
| MSTRG. 27814. 17 | 72   | 0. 33485 | 6. 718200684 | 1  |
| MSTRG. 27838. 3  | 506  | 0. 39349 | 7. 653991699 | 1  |
| MSTRG. 27838. 2  | 506  | 0. 43033 | 7. 653991699 | 1  |
| MSTRG. 27838. 4  | 506  | 0. 412   | 7. 653991699 | 1  |
| MSTRG. 27839. 1  | 90   | 0. 45601 | 6. 063415527 | -1 |
| MSTRG. 27840. 1  | 127  | 0. 3     | 9. 442932129 | 1  |
| MSTRG. 27842. 1  | 63   | 0. 38426 | 11. 28363037 | 1  |
| MSTRG. 27842. 2  | 24   | 0. 33814 | 9. 496276855 | 1  |
| MSTRG. 27846. 1  | 211  | 0. 45162 | 6. 148742676 | 1  |
| MSTRG. 27846. 2  | 153  | 0. 28948 | 6. 91204834  | 1  |
| MSTRG. 27846. 3  | 153  | 0. 28948 | 6. 91204834  | 1  |
| MSTRG. 27846. 4  | 1052 | 0. 44015 | 6. 560119629 | 1  |
| MSTRG. 27846. 5  | 1052 | 0. 36085 | 6. 560119629 | 1  |
| MSTRG. 27846. 7  | 915  | 0. 42476 | 7. 750183105 | 1  |
| MSTRG. 27846. 9  | 892  | 0. 3937  | 8. 170593262 | 1  |
| MSTRG. 27846. 8  | 895  | 0. 35748 | 8. 598571777 | 1  |
| MSTRG. 27846. 11 | 1032 | 0. 35745 | 7. 641906738 | 1  |
| MSTRG. 27846. 12 | 895  | 0. 37294 | 8. 598571777 | 1  |
| MSTRG. 27847. 1  | 165  | 0. 27433 | 8. 714050293 | 1  |
| MSTRG. 27848. 1  | 120  | 0. 33114 | 8. 89666748  | 1  |
| MSTRG. 27846. 13 | 673  | 0. 29892 | 8. 159606934 | 1  |
| MSTRG. 27846. 15 | 496  | 0. 32005 | 6. 584655762 | 1  |
| MSTRG. 27844. 2  | 37   | 0. 39165 | 8. 632751465 | 1  |
| MSTRG. 27884. 3  | 5642 | 0. 47555 | 5. 648864746 | 1  |
| MSTRG. 27884. 6  | 7569 | 0. 47555 | 5. 07623291  | 1  |
| MSTRG. 27885. 1  | 139  | 0. 32396 | 4. 798278809 | 1  |
| MSTRG. 27884. 11 | 5562 | 0. 46334 | 5. 527038574 | 1  |
| MSTRG. 27884. 9  | 5556 | 0. 46334 | 5. 507629395 | 1  |
| MSTRG. 27884. 8  | 5599 | 0. 47555 | 5. 538269043 | 1  |
| MSTRG. 27884. 12 | 5293 | 0. 46726 | 5. 448547363 | 1  |
| MSTRG. 27884. 14 | 4009 | 0. 43713 | 5. 455627441 | 1  |
| MSTRG. 27884. 15 | 4647 | 0. 47555 | 5. 469543457 | 1  |
| MSTRG. 27884. 16 | 2652 | 0. 46998 | 5. 564758301 | 1  |
| MSTRG. 27884. 17 | 2646 | 0. 46281 | 5. 564758301 | 1  |
| MSTRG. 27884. 18 | 2689 | 0. 46998 | 5. 58782959  | 1  |
| MSTRG. 27884. 19 | 1544 | 0. 46736 | 5. 91204834  | 1  |

|                  |      |          |              |    |
|------------------|------|----------|--------------|----|
| MSTRG. 27884. 20 | 615  | 0. 41248 | 9. 930969238 | 1  |
| MSTRG. 27854. 1  | 55   | 0. 41695 | 6. 245544434 | -1 |
| MSTRG. 27852. 1  | 223  | 0. 4413  | 10. 03900146 | 1  |
| MSTRG. 27862. 1  | 80   | 0. 38116 | 5. 034484863 | 1  |
| MSTRG. 27863. 2  | 268  | 0. 40829 | 6. 331359863 | 1  |
| MSTRG. 27864. 1  | 63   | 0. 28094 | 6. 691223145 | -1 |
| MSTRG. 27865. 1  | 138  | 0. 30505 | 7. 827453613 | 1  |
| MSTRG. 27870. 1  | 719  | 0. 44926 | 6. 105773926 | 1  |
| MSTRG. 27870. 3  | 740  | 0. 43894 | 6. 50604248  | 1  |
| MSTRG. 27870. 4  | 719  | 0. 41654 | 6. 320129395 | 1  |
| MSTRG. 27870. 5  | 575  | 0. 32858 | 9. 58416748  | 1  |
| MSTRG. 27875. 2  | 74   | 0. 30515 | 6. 95526123  | 1  |
| MSTRG. 27876. 1  | 260  | 0. 45831 | 4. 430480957 | 1  |
| MSTRG. 27878. 5  | 683  | 0. 40137 | 8. 717834473 | 1  |
| MSTRG. 27880. 3  | 1365 | 0. 39814 | 6. 74420166  | 1  |
| MSTRG. 27882. 2  | 469  | 0. 41084 | 6. 426330566 | 1  |
| MSTRG. 27882. 4  | 78   | 0. 45534 | 6. 238098145 | 1  |
| MSTRG. 27882. 3  | 163  | 0. 4741  | 6. 092346191 | 1  |
| MSTRG. 27893. 3  | 665  | 0. 37483 | 8. 304992676 | 1  |
| MSTRG. 27901. 7  | 748  | 0. 48575 | 4. 67376709  | 1  |
| MSTRG. 27901. 8  | 748  | 0. 45242 | 4. 67376709  | 1  |
| MSTRG. 27904. 1  | 236  | 0. 28855 | 8. 970153809 | 1  |
| MSTRG. 27905. 5  | 724  | 0. 44141 | 9. 427307129 | 1  |
| MSTRG. 27908. 4  | 177  | 0. 4764  | 7. 765441895 | 1  |
| MSTRG. 27908. 5  | 64   | 0. 4388  | 9. 778991699 | 1  |
| MSTRG. 27909. 1  | 1274 | 0. 46221 | 9. 02532959  | 1  |
| MSTRG. 27909. 4  | 891  | 0. 46481 | 6. 602722168 | 1  |
| MSTRG. 27909. 3  | 879  | 0. 43897 | 6. 686096191 | 1  |
| MSTRG. 27909. 5  | 877  | 0. 46481 | 6. 602478027 | 1  |
| MSTRG. 27910. 1  | 16   | 0. 3515  | 8. 500061035 | 1  |
| MSTRG. 27896. 1  | 219  | 0. 37517 | 11. 88873291 | 1  |
| MSTRG. 27896. 2  | 202  | 0. 36025 | 11. 96429443 | 1  |
| MSTRG. 27897. 1  | 116  | 0. 43248 | 4. 561096191 | 1  |
| MSTRG. 27897. 2  | 112  | 0. 441   | 4. 488098145 | 1  |
| MSTRG. 27897. 5  | 206  | 0. 42026 | 5. 221008301 | 1  |
| MSTRG. 27900. 2  | 310  | 0. 34474 | 11. 184021   | 1  |
| MSTRG. 27922. 2  | 228  | 0. 27599 | 9. 260559082 | 1  |
| MSTRG. 27913. 2  | 158  | 0. 34889 | 11. 29046631 | -1 |
| MSTRG. 27925. 1  | 172  | 0. 30121 | 5. 716125488 | 1  |
| MSTRG. 27925. 3  | 172  | 0. 32431 | 5. 716125488 | 1  |
| MSTRG. 27928. 1  | 216  | 0. 30432 | 4. 372741699 | 1  |
| MSTRG. 27934. 2  | 1121 | 0. 41628 | 5. 944885254 | 1  |
| MSTRG. 27935. 1  | 150  | 0. 28503 | 6. 233947754 | 1  |
| MSTRG. 27936. 1  | 92   | 0. 28338 | 6. 386657715 | 1  |
| MSTRG. 27941. 3  | 499  | 0. 45922 | 4. 979797363 | 1  |
| MSTRG. 27942. 1  | 82   | 0. 27217 | 8. 690979004 | 1  |
| MSTRG. 27942. 4  | 31   | 0. 34957 | 4. 973571777 | 1  |
| MSTRG. 27942. 3  | 80   | 0. 33017 | 9. 186096191 | 1  |
| MSTRG. 27942. 2  | 82   | 0. 32559 | 8. 690979004 | 1  |
| MSTRG. 27943. 2  | 93   | 0. 3053  | 9. 637878418 | 1  |
| MSTRG. 27943. 1  | 93   | 0. 2766  | 9. 637878418 | 1  |
| MSTRG. 27943. 3  | 113  | 0. 36053 | 10. 07501221 | 1  |
| MSTRG. 27945. 3  | 570  | 0. 4724  | 5. 698425293 | 1  |
| MSTRG. 27945. 5  | 497  | 0. 41151 | 5. 898254395 | 1  |

|                  |     |          |              |    |
|------------------|-----|----------|--------------|----|
| MSTRG. 27940. 2  | 450 | 0. 4388  | 6. 910949707 | 1  |
| MSTRG. 27949. 1  | 370 | 0. 44252 | 9. 355651855 | 1  |
| MSTRG. 27949. 2  | 391 | 0. 46486 | 9. 590393066 | 1  |
| MSTRG. 27950. 3  | 457 | 0. 36589 | 5. 89239502  | 1  |
| MSTRG. 27950. 4  | 457 | 0. 36589 | 5. 89239502  | 1  |
| MSTRG. 27951. 1  | 57  | 0. 32161 | 4. 100524902 | 1  |
| MSTRG. 27950. 6  | 256 | 0. 37351 | 8. 600402832 | 1  |
| MSTRG. 27952. 1  | 115 | 0. 34079 | 8. 931091309 | 1  |
| MSTRG. 27953. 1  | 234 | 0. 32974 | 9. 054138184 | 1  |
| MSTRG. 27955. 1  | 87  | 0. 34339 | 5. 649963379 | 1  |
| MSTRG. 27954. 5  | 338 | 0. 37635 | 7. 939147949 | 1  |
| MSTRG. 27956. 1  | 655 | 0. 41346 | 5. 739196777 | 1  |
| MSTRG. 27956. 5  | 499 | 0. 48053 | 5. 821716309 | 1  |
| MSTRG. 27957. 4  | 392 | 0. 41675 | 4. 934265137 | 1  |
| MSTRG. 27957. 3  | 472 | 0. 43018 | 4. 870910645 | 1  |
| MSTRG. 27957. 5  | 864 | 0. 49723 | 5. 277648926 | 1  |
| MSTRG. 27957. 6  | 739 | 0. 43641 | 7. 77557373  | 1  |
| MSTRG. 27957. 7  | 834 | 0. 47058 | 5. 545471191 | 1  |
| MSTRG. 27957. 8  | 942 | 0. 47445 | 6. 108703613 | 1  |
| MSTRG. 27957. 9  | 914 | 0. 49785 | 5. 368469238 | 1  |
| MSTRG. 27957. 10 | 783 | 0. 45726 | 6. 424133301 | -1 |
| MSTRG. 27959. 1  | 224 | 0. 31285 | 12. 27398682 | 1  |
| MSTRG. 27960. 1  | 134 | 0. 29607 | 9. 757019043 | 1  |
| MSTRG. 27960. 2  | 100 | 0. 37817 | 9. 600524902 | 1  |
| MSTRG. 27961. 1  | 157 | 0. 32847 | 11. 3069458  | 1  |
| MSTRG. 27963. 2  | 627 | 0. 4176  | 6. 271911621 | 1  |
| MSTRG. 27967. 4  | 419 | 0. 31192 | 5. 08380127  | 1  |
| MSTRG. 27967. 5  | 419 | 0. 32126 | 5. 08380127  | 1  |
| MSTRG. 27967. 6  | 419 | 0. 31192 | 5. 08380127  | 1  |
| MSTRG. 27967. 7  | 419 | 0. 32725 | 5. 08380127  | 1  |
| MSTRG. 27968. 3  | 172 | 0. 36085 | 8. 984924316 | 1  |
| MSTRG. 27968. 4  | 123 | 0. 36004 | 9. 464416504 | 1  |
| MSTRG. 27964. 2  | 150 | 0. 37421 | 8. 616516113 | 1  |
| MSTRG. 27969. 3  | 263 | 0. 41631 | 10. 16168213 | 1  |
| MSTRG. 27969. 4  | 263 | 0. 41631 | 10. 16168213 | 1  |
| MSTRG. 27970. 2  | 161 | 0. 36379 | 8. 833679199 | 1  |
| MSTRG. 27975. 5  | 138 | 0. 28443 | 8. 686950684 | 1  |
| MSTRG. 27975. 4  | 168 | 0. 36365 | 9. 478942871 | 1  |
| MSTRG. 27975. 7  | 161 | 0. 27327 | 9. 385559082 | 1  |
| MSTRG. 27983. 2  | 184 | 0. 43239 | 9. 096984863 | 1  |
| MSTRG. 27985. 1  | 62  | 0. 40399 | 6. 887145996 | 1  |
| MSTRG. 27988. 3  | 490 | 0. 45907 | 7. 817321777 | 1  |
| MSTRG. 27995. 1  | 227 | 0. 29816 | 7. 878356934 | 1  |
| MSTRG. 27995. 3  | 74  | 0. 29464 | 7. 704284668 | 1  |
| MSTRG. 27996. 1  | 132 | 0. 32244 | 9. 632141113 | 1  |
| MSTRG. 27996. 2  | 132 | 0. 32244 | 9. 632141113 | 1  |
| MSTRG. 27997. 1  | 137 | 0. 28165 | 9. 882873535 | 1  |
| MSTRG. 28003. 6  | 708 | 0. 41957 | 5. 875427246 | 1  |
| MSTRG. 28004. 1  | 35  | 0. 39363 | 4. 950378418 | 1  |
| MSTRG. 28005. 1  | 152 | 0. 29343 | 5. 645935059 | 1  |
| MSTRG. 28005. 2  | 152 | 0. 29343 | 5. 645935059 | 1  |
| MSTRG. 28003. 7  | 385 | 0. 34795 | 5. 16217041  | 1  |
| MSTRG. 28003. 8  | 403 | 0. 33398 | 5. 219787598 | 1  |
| MSTRG. 28003. 9  | 113 | 0. 30492 | 10. 79803467 | 1  |

|                 |      |          |              |    |
|-----------------|------|----------|--------------|----|
| MSTRG. 28007. 2 | 142  | 0. 34588 | 5. 320495605 | 1  |
| MSTRG. 28008. 1 | 4731 | 0. 45833 | 5. 725402832 | 1  |
| MSTRG. 28008. 2 | 4731 | 0. 45833 | 5. 725402832 | 1  |
| MSTRG. 28008. 3 | 3589 | 0. 46542 | 5. 617126465 | 1  |
| MSTRG. 28009. 1 | 36   | 0. 43264 | 9. 498718262 | 1  |
| MSTRG. 28011. 1 | 64   | 0. 46348 | 9. 51776123  | -1 |
| MSTRG. 28012. 5 | 1067 | 0. 45689 | 6. 505432129 | 1  |
| MSTRG. 28012. 4 | 1076 | 0. 46322 | 6. 438537598 | 1  |
| MSTRG. 28013. 3 | 639  | 0. 3417  | 8. 944030762 | 1  |
| MSTRG. 28018. 2 | 112  | 0. 29959 | 10. 0894165  | 1  |
| MSTRG. 28033. 6 | 312  | 0. 42697 | 9. 218688965 | 1  |
| MSTRG. 28033. 8 | 312  | 0. 431   | 9. 218688965 | 1  |
| MSTRG. 28033. 5 | 318  | 0. 43771 | 9. 218688965 | 1  |
| MSTRG. 28033. 7 | 312  | 0. 43771 | 9. 218688965 | 1  |
| MSTRG. 28034. 2 | 991  | 0. 46317 | 8. 530944824 | -1 |
| MSTRG. 28034. 4 | 991  | 0. 44688 | 8. 530944824 | -1 |
| MSTRG. 28034. 9 | 649  | 0. 35168 | 7. 409729004 | 1  |
| MSTRG. 28034. 5 | 615  | 0. 41107 | 8. 356262207 | -1 |
| MSTRG. 28034. 6 | 615  | 0. 45458 | 8. 356262207 | -1 |
| MSTRG. 28025. 1 | 113  | 0. 35081 | 11. 18890381 | 1  |
| MSTRG. 28024. 4 | 483  | 0. 45182 | 6. 025085449 | 1  |
| MSTRG. 28027. 1 | 101  | 0. 38489 | 10. 12481689 | -1 |
| MSTRG. 28027. 2 | 101  | 0. 39956 | 10. 12481689 | -1 |
| MSTRG. 28040. 1 | 683  | 0. 38993 | 9. 412536621 | 1  |
| MSTRG. 28040. 2 | 580  | 0. 38518 | 9. 757019043 | 1  |
| MSTRG. 28040. 4 | 580  | 0. 41248 | 9. 757019043 | 1  |
| MSTRG. 28045. 3 | 166  | 0. 35824 | 5. 341491699 | 1  |
| MSTRG. 28035. 2 | 212  | 0. 43006 | 9. 296081543 | -1 |
| MSTRG. 28055. 1 | 49   | 0. 29691 | 7. 801330566 | 1  |
| MSTRG. 28058. 1 | 107  | 0. 28883 | 5. 096618652 | 1  |
| MSTRG. 28059. 1 | 23   | 0. 32597 | 5. 894958496 | 1  |
| MSTRG. 28051. 1 | 1082 | 0. 30801 | 6. 298278809 | 1  |
| MSTRG. 28051. 4 | 83   | 0. 28248 | 8. 50982666  | 1  |
| MSTRG. 28051. 7 | 87   | 0. 29367 | 6. 162658691 | 1  |
| MSTRG. 28062. 1 | 85   | 0. 26751 | 8. 591247559 | 1  |
| MSTRG. 28064. 1 | 222  | 0. 46056 | 8. 663146973 | 1  |
| MSTRG. 28070. 1 | 1701 | 0. 4732  | 5. 623596191 | 1  |
| MSTRG. 28072. 3 | 261  | 0. 43917 | 11. 25604248 | 1  |
| MSTRG. 28076. 1 | 43   | 0. 40665 | 10. 89508057 | 1  |
| MSTRG. 28075. 1 | 280  | 0. 4111  | 9. 477233887 | -1 |
| MSTRG. 28081. 1 | 1037 | 0. 41244 | 8. 505187988 | 1  |
| MSTRG. 28085. 6 | 548  | 0. 47223 | 5. 481628418 | 1  |
| MSTRG. 28091. 4 | 143  | 0. 2921  | 4. 742004395 | 1  |
| MSTRG. 28091. 2 | 559  | 0. 28496 | 8. 808654785 | 1  |
| MSTRG. 28093. 2 | 514  | 0. 46177 | 6. 523010254 | 1  |
| MSTRG. 28095. 3 | 122  | 0. 37482 | 10. 19622803 | 1  |
| MSTRG. 28095. 2 | 179  | 0. 42049 | 5. 054748535 | 1  |
| MSTRG. 28097. 2 | 61   | 0. 42335 | 4. 950012207 | -1 |
| MSTRG. 28098. 2 | 145  | 0. 31548 | 10. 76568604 | 1  |
| MSTRG. 28098. 1 | 145  | 0. 29703 | 10. 76568604 | 1  |
| MSTRG. 28098. 3 | 211  | 0. 35012 | 9. 410461426 | 1  |
| MSTRG. 28099. 3 | 830  | 0. 4381  | 7. 853942871 | 1  |
| MSTRG. 28100. 1 | 717  | 0. 42465 | 5. 555847168 | 1  |
| MSTRG. 28100. 5 | 686  | 0. 439   | 5. 393981934 | 1  |

|                |     |         |             |    |
|----------------|-----|---------|-------------|----|
| MSTRG. 28100.6 | 752 | 0.42465 | 5.837097168 | -1 |
| MSTRG. 28100.7 | 728 | 0.42217 | 5.811828613 | 1  |
| MSTRG. 28100.8 | 692 | 0.439   | 5.738708496 | 1  |
| MSTRG. 28105.5 | 456 | 0.43115 | 8.621398926 | 1  |
| MSTRG. 28105.6 | 456 | 0.41275 | 8.621398926 | 1  |
| MSTRG. 28107.1 | 724 | 0.46723 | 4.967224121 | 1  |
| MSTRG. 28109.3 | 271 | 0.45046 | 9.190856934 | 1  |
| MSTRG. 28109.4 | 205 | 0.37294 | 9.534118652 | 1  |
| MSTRG. 28109.2 | 217 | 0.43987 | 7.023986816 | 1  |
| MSTRG. 28109.5 | 271 | 0.41832 | 9.190856934 | 1  |
| MSTRG. 28121.1 | 77  | 0.30085 | 6.876403809 | 1  |
| MSTRG. 28122.1 | 77  | 0.35937 | 10.00750732 | 1  |
| MSTRG. 28115.4 | 54  | 0.2675  | 9.61932373  | 1  |
| MSTRG. 28114.2 | 252 | 0.38122 | 5.537414551 | 1  |
| MSTRG. 28127.1 | 68  | 0.43123 | 6.211853027 | 1  |
| MSTRG. 28132.2 | 366 | 0.44113 | 9.456115723 | 1  |
| MSTRG. 28137.1 | 63  | 0.27677 | 10.49578857 | 1  |
| MSTRG. 28131.3 | 129 | 0.37096 | 6.011169434 | 1  |
| MSTRG. 28141.1 | 36  | 0.30288 | 5.996154785 | 1  |
| MSTRG. 28142.2 | 649 | 0.4187  | 8.231384277 | 1  |
| MSTRG. 28147.1 | 590 | 0.43713 | 6.551940918 | 1  |
| MSTRG. 28154.1 | 21  | 0.31529 | 9.34967041  | 1  |
| MSTRG. 28160.1 | 709 | 0.47415 | 7.621276855 | 1  |
| MSTRG. 28160.5 | 279 | 0.34546 | 9.141784668 | 1  |
| MSTRG. 28161.1 | 67  | 0.41172 | 9.50982666  | 1  |
| MSTRG. 28162.1 | 142 | 0.4116  | 9.915466309 | 1  |
| MSTRG. 28168.3 | 543 | 0.46624 | 8.789001465 | 1  |
| MSTRG. 28174.1 | 103 | 0.34441 | 8.954772949 | 1  |
| MSTRG. 28174.2 | 103 | 0.36426 | 8.954772949 | 1  |
| MSTRG. 28175.1 | 163 | 0.37639 | 9.669006348 | 1  |
| MSTRG. 28177.1 | 121 | 0.33054 | 10.44329834 | 1  |
| MSTRG. 28178.1 | 243 | 0.36562 | 8.63848877  | 1  |
| MSTRG. 28171.1 | 46  | 0.3737  | 10.39801025 | -1 |
| MSTRG. 28186.1 | 53  | 0.34678 | 5.052307129 | 1  |
| MSTRG. 28191.1 | 99  | 0.36088 | 10.78704834 | 1  |
| MSTRG. 28191.8 | 33  | 0.39671 | 12.31060791 | 1  |
| MSTRG. 28192.3 | 230 | 0.4633  | 8.782409668 | 1  |
| MSTRG. 28204.2 | 113 | 0.34566 | 10.04229736 | 1  |
| MSTRG. 28207.1 | 34  | 0.40149 | 4.723571777 | 1  |
| MSTRG. 28207.2 | 80  | 0.45973 | 10.06781006 | 1  |
| MSTRG. 28207.3 | 21  | 0.38466 | 11.71258545 | 1  |
| MSTRG. 28211.2 | 250 | 0.46275 | 9.300109863 | 1  |
| MSTRG. 28213.2 | 132 | 0.40042 | 5.192687988 | 1  |
| MSTRG. 28194.2 | 218 | 0.45604 | 5.574645996 | -1 |
| MSTRG. 28196.2 | 42  | 0.31877 | 9.236633301 | 1  |
| MSTRG. 28197.1 | 44  | 0.43934 | 10.58258057 | 1  |
| MSTRG. 28214.1 | 49  | 0.38445 | 6.471130371 | 1  |
| MSTRG. 28220.1 | 439 | 0.41845 | 5.172302246 | 1  |
| MSTRG. 28220.2 | 430 | 0.35653 | 7.178649902 | 1  |
| MSTRG. 28223.2 | 94  | 0.37423 | 5.839172363 | 1  |
| MSTRG. 28224.2 | 287 | 0.40247 | 9.551330566 | 1  |
| MSTRG. 28217.1 | 42  | 0.33059 | 7.916687012 | 1  |
| MSTRG. 28217.2 | 42  | 0.37492 | 7.916687012 | 1  |
| MSTRG. 28225.1 | 316 | 0.47098 | 8.159973145 | 1  |



|                  |      |          |              |    |
|------------------|------|----------|--------------|----|
| MSTRG. 28227. 3  | 379  | 0. 43101 | 9. 683044434 | 1  |
| MSTRG. 28249. 2  | 1741 | 0. 46385 | 7. 213195801 | 1  |
| MSTRG. 28249. 3  | 1741 | 0. 46385 | 6. 969299316 | 1  |
| MSTRG. 28249. 4  | 1714 | 0. 49217 | 7. 065612793 | 1  |
| MSTRG. 28249. 5  | 1741 | 0. 4823  | 6. 969177246 | 1  |
| MSTRG. 28249. 7  | 909  | 0. 45565 | 5. 690734863 | 1  |
| MSTRG. 28249. 8  | 609  | 0. 45648 | 5. 092224121 | 1  |
| MSTRG. 28249. 6  | 1741 | 0. 46385 | 7. 081848145 | 1  |
| MSTRG. 28249. 9  | 1397 | 0. 46578 | 7. 049133301 | 1  |
| MSTRG. 28249. 11 | 1741 | 0. 49    | 7. 217956543 | 1  |
| MSTRG. 28250. 1  | 146  | 0. 44677 | 9. 122497559 | -1 |
| MSTRG. 28251. 1  | 738  | 0. 31824 | 8. 343688965 | 1  |
| MSTRG. 28251. 2  | 738  | 0. 31581 | 8. 343688965 | 1  |
| MSTRG. 28251. 5  | 738  | 0. 39049 | 8. 343688965 | 1  |
| MSTRG. 28251. 6  | 148  | 0. 3481  | 9. 500671387 | 1  |
| MSTRG. 28249. 13 | 1749 | 0. 46385 | 7. 202453613 | 1  |
| MSTRG. 28232. 2  | 1199 | 0. 44816 | 5. 982727051 | 1  |
| MSTRG. 28233. 2  | 132  | 0. 41355 | 4. 63470459  | 1  |
| MSTRG. 28233. 3  | 374  | 0. 44509 | 9. 495056152 | 1  |
| MSTRG. 28233. 4  | 132  | 0. 38604 | 4. 63470459  | 1  |
| MSTRG. 28236. 2  | 644  | 0. 44062 | 5. 13067627  | 1  |
| MSTRG. 28236. 4  | 667  | 0. 42055 | 5. 945007324 | 1  |
| MSTRG. 28229. 1  | 356  | 0. 41171 | 5. 739685059 | 1  |
| MSTRG. 28239. 1  | 641  | 0. 44424 | 5. 89276123  | 1  |
| MSTRG. 28244. 2  | 1319 | 0. 46976 | 9. 259094238 | 1  |
| MSTRG. 28244. 3  | 42   | 0. 37458 | 7. 916564941 | 1  |
| MSTRG. 28244. 6  | 969  | 0. 49469 | 6. 238952637 | 1  |
| MSTRG. 28246. 2  | 169  | 0. 4599  | 5. 42767334  | 1  |
| MSTRG. 28247. 1  | 99   | 0. 31338 | 8. 838562012 | 1  |
| MSTRG. 28247. 3  | 234  | 0. 3369  | 10. 74676514 | 1  |
| MSTRG. 28247. 5  | 94   | 0. 33434 | 8. 350524902 | 1  |
| MSTRG. 28247. 2  | 94   | 0. 29952 | 8. 350524902 | 1  |
| MSTRG. 28241. 1  | 157  | 0. 38128 | 11. 61444092 | 1  |
| MSTRG. 28242. 1  | 215  | 0. 35535 | 5. 329040527 | 1  |
| MSTRG. 28242. 3  | 215  | 0. 37647 | 5. 329040527 | 1  |
| MSTRG. 28242. 5  | 215  | 0. 4288  | 5. 329040527 | 1  |
| MSTRG. 28243. 1  | 351  | 0. 36649 | 9. 329528809 | 1  |
| MSTRG. 28255. 2  | 116  | 0. 3586  | 8. 913269043 | 1  |
| MSTRG. 28256. 5  | 1115 | 0. 44842 | 5. 400695801 | 1  |
| MSTRG. 28257. 2  | 2143 | 0. 44463 | 9. 355285645 | 1  |
| MSTRG. 28257. 3  | 2166 | 0. 41625 | 9. 456970215 | 1  |
| MSTRG. 28257. 4  | 2147 | 0. 44463 | 9. 457092285 | 1  |
| MSTRG. 28300. 1  | 51   | 0. 3371  | 4. 87689209  | -1 |
| MSTRG. 28300. 2  | 112  | 0. 28195 | 7. 903015137 | 1  |
| MSTRG. 28301. 1  | 51   | 0. 44945 | 6. 047302246 | 1  |
| MSTRG. 28300. 3  | 363  | 0. 36816 | 5. 561340332 | 1  |
| MSTRG. 28300. 4  | 332  | 0. 48281 | 5. 341247559 | 1  |
| MSTRG. 28300. 5  | 332  | 0. 48281 | 5. 184753418 | 1  |
| MSTRG. 28300. 6  | 366  | 0. 35018 | 5. 363952637 | 1  |
| MSTRG. 28300. 8  | 331  | 0. 43366 | 5. 191345215 | -1 |
| MSTRG. 28300. 9  | 363  | 0. 39071 | 5. 661804199 | 1  |
| MSTRG. 28300. 10 | 363  | 0. 37793 | 5. 468322754 | 1  |
| MSTRG. 28308. 1  | 777  | 0. 43615 | 5. 959777832 | 1  |
| MSTRG. 28308. 6  | 801  | 0. 44812 | 5. 835510254 | 1  |

|                  |      |          |              |    |
|------------------|------|----------|--------------|----|
| MSTRG. 28312. 1  | 915  | 0. 43011 | 6. 267150879 | 1  |
| MSTRG. 28312. 3  | 915  | 0. 42635 | 6. 267150879 | 1  |
| MSTRG. 28312. 2  | 915  | 0. 40974 | 6. 267150879 | 1  |
| MSTRG. 28312. 4  | 915  | 0. 42387 | 6. 267150879 | 1  |
| MSTRG. 28315. 1  | 27   | 0. 44664 | 8. 040588379 | 1  |
| MSTRG. 28316. 8  | 348  | 0. 48069 | 5. 753967285 | 1  |
| MSTRG. 28319. 1  | 1478 | 0. 49621 | 5. 696594238 | 1  |
| MSTRG. 28319. 2  | 1479 | 0. 49621 | 5. 696594238 | 1  |
| MSTRG. 28319. 4  | 1479 | 0. 49456 | 5. 696594238 | 1  |
| MSTRG. 28319. 6  | 1670 | 0. 49366 | 5. 432678223 | 1  |
| MSTRG. 28321. 1  | 608  | 0. 37555 | 5. 580749512 | 1  |
| MSTRG. 28325. 2  | 280  | 0. 3615  | 10. 31939697 | 1  |
| MSTRG. 28325. 5  | 326  | 0. 42008 | 9. 870666504 | 1  |
| MSTRG. 28324. 3  | 924  | 0. 41892 | 9. 218322754 | 1  |
| MSTRG. 28326. 1  | 844  | 0. 4405  | 6. 194274902 | 1  |
| MSTRG. 28328. 2  | 187  | 0. 34558 | 9. 970031738 | 1  |
| MSTRG. 28329. 3  | 469  | 0. 36641 | 4. 972106934 | 1  |
| MSTRG. 28332. 2  | 147  | 0. 44029 | 10. 18511963 | 1  |
| MSTRG. 28300. 13 | 76   | 0. 3379  | 8. 760681152 | 1  |
| MSTRG. 28266. 4  | 373  | 0. 46017 | 5. 641906738 | 1  |
| MSTRG. 28266. 5  | 357  | 0. 45394 | 5. 833679199 | -1 |
| MSTRG. 28266. 7  | 166  | 0. 41329 | 4. 944396973 | -1 |
| MSTRG. 28267. 1  | 130  | 0. 39822 | 10. 21966553 | 1  |
| MSTRG. 28267. 2  | 93   | 0. 43966 | 6. 813537598 | 1  |
| MSTRG. 28266. 17 | 130  | 0. 41329 | 5. 901672363 | -1 |
| MSTRG. 28274. 1  | 93   | 0. 36121 | 8. 73236084  | 1  |
| MSTRG. 28274. 2  | 93   | 0. 38328 | 8. 73236084  | 1  |
| MSTRG. 28270. 1  | 561  | 0. 29912 | 9. 564880371 | 1  |
| MSTRG. 28271. 1  | 184  | 0. 3808  | 7. 716247559 | 1  |
| MSTRG. 28281. 2  | 899  | 0. 44018 | 8. 496520996 | 1  |
| MSTRG. 28281. 3  | 784  | 0. 44018 | 8. 27545166  | 1  |
| MSTRG. 28281. 4  | 784  | 0. 45558 | 8. 27545166  | 1  |
| MSTRG. 28281. 5  | 906  | 0. 4572  | 8. 496520996 | 1  |
| MSTRG. 28281. 6  | 803  | 0. 4396  | 8. 379821777 | 1  |
| MSTRG. 28281. 7  | 875  | 0. 45082 | 8. 469177246 | 1  |
| MSTRG. 28281. 8  | 933  | 0. 4396  | 8. 486633301 | 1  |
| MSTRG. 28281. 9  | 336  | 0. 31201 | 8. 273376465 | 1  |
| MSTRG. 28281. 10 | 314  | 0. 44226 | 9. 09576416  | 1  |
| MSTRG. 28294. 2  | 337  | 0. 3658  | 5. 25592041  | 1  |
| MSTRG. 28297. 3  | 127  | 0. 35748 | 9. 49017334  | 1  |
| MSTRG. 28335. 1  | 608  | 0. 33667 | 6. 70513916  | 1  |
| MSTRG. 28336. 1  | 63   | 0. 37539 | 10. 45001221 | 1  |
| MSTRG. 28335. 2  | 608  | 0. 36813 | 6. 70513916  | 1  |
| MSTRG. 28335. 3  | 614  | 0. 37681 | 6. 843444824 | 1  |
| MSTRG. 28338. 1  | 806  | 0. 45249 | 5. 009338379 | 1  |
| MSTRG. 28339. 3  | 479  | 0. 36444 | 8. 585510254 | 1  |
| MSTRG. 28341. 2  | 291  | 0. 36682 | 5. 702941895 | 1  |
| MSTRG. 28341. 4  | 261  | 0. 37002 | 5. 416442871 | 1  |
| MSTRG. 28342. 3  | 578  | 0. 30235 | 7. 041809082 | 1  |
| MSTRG. 28342. 4  | 578  | 0. 29551 | 7. 041809082 | 1  |
| MSTRG. 28343. 1  | 51   | 0. 42619 | 4. 800109863 | 1  |
| MSTRG. 28367. 1  | 126  | 0. 45365 | 10. 31451416 | 1  |
| MSTRG. 28367. 2  | 126  | 0. 43979 | 10. 31451416 | 1  |
| MSTRG. 28368. 2  | 130  | 0. 44573 | 10. 90313721 | 1  |

|                  |      |          |              |    |
|------------------|------|----------|--------------|----|
| MSTRG. 28370. 1  | 154  | 0. 38986 | 11. 54730225 | 1  |
| MSTRG. 28371. 1  | 126  | 0. 39984 | 10. 31451416 | 1  |
| MSTRG. 28372. 1  | 103  | 0. 41335 | 11. 362854   | 1  |
| MSTRG. 28375. 1  | 90   | 0. 33465 | 9. 331237793 | 1  |
| MSTRG. 28377. 1  | 39   | 0. 47038 | 11. 56756592 | 1  |
| MSTRG. 28371. 2  | 126  | 0. 41203 | 10. 31451416 | 1  |
| MSTRG. 28371. 3  | 126  | 0. 37292 | 10. 31451416 | 1  |
| MSTRG. 28378. 1  | 128  | 0. 46077 | 10. 88311768 | 1  |
| MSTRG. 28379. 1  | 218  | 0. 42403 | 11. 11212158 | 1  |
| MSTRG. 28380. 1  | 126  | 0. 4532  | 10. 31451416 | 1  |
| MSTRG. 28386. 3  | 126  | 0. 44411 | 10. 31451416 | 1  |
| MSTRG. 28386. 2  | 126  | 0. 45599 | 10. 31451416 | 1  |
| MSTRG. 28388. 1  | 136  | 0. 42718 | 11. 12701416 | 1  |
| MSTRG. 28386. 4  | 131  | 0. 38805 | 10. 26434326 | 1  |
| MSTRG. 28388. 2  | 136  | 0. 48778 | 11. 12701416 | 1  |
| MSTRG. 28389. 1  | 221  | 0. 32076 | 10. 96539307 | 1  |
| MSTRG. 28379. 2  | 136  | 0. 47097 | 11. 12701416 | 1  |
| MSTRG. 28388. 3  | 136  | 0. 49961 | 11. 12701416 | 1  |
| MSTRG. 28371. 4  | 126  | 0. 43615 | 10. 31451416 | 1  |
| MSTRG. 28359. 7  | 101  | 0. 30596 | 8. 75958252  | 1  |
| MSTRG. 28359. 6  | 509  | 0. 35488 | 9. 60760498  | 1  |
| MSTRG. 28359. 3  | 459  | 0. 32661 | 9. 492858887 | 1  |
| MSTRG. 28359. 5  | 697  | 0. 40377 | 9. 089172363 | 1  |
| MSTRG. 28359. 8  | 508  | 0. 34615 | 9. 60760498  | 1  |
| MSTRG. 28359. 9  | 698  | 0. 42275 | 9. 089172363 | 1  |
| MSTRG. 28359. 10 | 89   | 0. 29772 | 6. 957946777 | 1  |
| MSTRG. 28361. 1  | 81   | 0. 38066 | 8. 83026123  | 1  |
| MSTRG. 28362. 1  | 102  | 0. 32642 | 7. 651062012 | 1  |
| MSTRG. 28359. 11 | 139  | 0. 29268 | 8. 836120605 | 1  |
| MSTRG. 28363. 1  | 146  | 0. 28199 | 9. 077087402 | 1  |
| MSTRG. 28363. 2  | 146  | 0. 30477 | 9. 077087402 | 1  |
| MSTRG. 28363. 3  | 144  | 0. 28167 | 9. 226135254 | 1  |
| MSTRG. 28366. 4  | 610  | 0. 44881 | 5. 376281738 | 1  |
| MSTRG. 28366. 5  | 1016 | 0. 40054 | 5. 175476074 | 1  |
| MSTRG. 28366. 6  | 610  | 0. 41295 | 5. 376281738 | 1  |
| MSTRG. 28393. 1  | 74   | 0. 28799 | 8. 609069824 | 1  |
| MSTRG. 28393. 3  | 228  | 0. 31274 | 8. 767028809 | 1  |
| MSTRG. 28393. 4  | 228  | 0. 33291 | 8. 767028809 | 1  |
| MSTRG. 28393. 6  | 171  | 0. 29116 | 6. 236633301 | 1  |
| MSTRG. 28393. 2  | 229  | 0. 34144 | 8. 915466309 | 1  |
| MSTRG. 28397. 1  | 443  | 0. 39616 | 7. 666809082 | 1  |
| MSTRG. 28399. 2  | 246  | 0. 44808 | 9. 016052246 | 1  |
| MSTRG. 28400. 1  | 475  | 0. 43756 | 5. 456604004 | 1  |
| MSTRG. 28400. 2  | 475  | 0. 43756 | 5. 456604004 | 1  |
| MSTRG. 28400. 3  | 475  | 0. 42408 | 5. 456604004 | 1  |
| MSTRG. 28401. 1  | 72   | 0. 44139 | 9. 019958496 | -1 |
| MSTRG. 28391. 2  | 154  | 0. 43859 | 5. 188903809 | 1  |
| MSTRG. 28403. 1  | 7    | 0. 43748 | 9. 700256348 | 1  |
| MSTRG. 28404. 1  | 125  | 0. 34436 | 8. 434143066 | 1  |
| MSTRG. 28409. 2  | 108  | 0. 32477 | 8. 945617676 | 1  |
| MSTRG. 28409. 1  | 91   | 0. 3824  | 5. 823669434 | 1  |
| MSTRG. 28409. 3  | 28   | 0. 35602 | 10. 06011963 | 1  |
| MSTRG. 28409. 4  | 53   | 0. 38536 | 8. 931335449 | 1  |
| MSTRG. 28409. 6  | 76   | 0. 33423 | 9. 565734863 | 1  |

|                  |      |          |              |    |
|------------------|------|----------|--------------|----|
| MSTRG. 28409. 5  | 41   | 0. 39064 | 10. 17108154 | 1  |
| MSTRG. 28409. 7  | 124  | 0. 29367 | 9. 811340332 | 1  |
| MSTRG. 28409. 8  | 115  | 0. 3368  | 6. 73236084  | 1  |
| MSTRG. 28410. 1  | 95   | 0. 29367 | 7. 671325684 | 1  |
| MSTRG. 28409. 9  | 107  | 0. 34779 | 10. 65545654 | 1  |
| MSTRG. 28409. 10 | 164  | 0. 30753 | 9. 958312988 | 1  |
| MSTRG. 28411. 1  | 148  | 0. 34579 | 10. 95001221 | 1  |
| MSTRG. 28409. 11 | 43   | 0. 41942 | 10. 06292725 | 1  |
| MSTRG. 28449. 3  | 379  | 0. 39255 | 5. 884216309 | 1  |
| MSTRG. 28457. 1  | 571  | 0. 42253 | 8. 694885254 | 1  |
| MSTRG. 28457. 2  | 571  | 0. 45665 | 8. 694885254 | 1  |
| MSTRG. 28457. 5  | 464  | 0. 39036 | 9. 05291748  | 1  |
| MSTRG. 28457. 6  | 578  | 0. 46508 | 8. 67364502  | 1  |
| MSTRG. 28459. 1  | 84   | 0. 3177  | 4. 358825684 | 1  |
| MSTRG. 28460. 1  | 105  | 0. 29115 | 9. 825378418 | 1  |
| MSTRG. 28463. 1  | 127  | 0. 3693  | 10. 36334229 | 1  |
| MSTRG. 28464. 1  | 148  | 0. 29387 | 9. 801452637 | 1  |
| MSTRG. 28466. 1  | 81   | 0. 28491 | 10. 03948975 | 1  |
| MSTRG. 28467. 1  | 87   | 0. 30477 | 10. 43707275 | 1  |
| MSTRG. 28470. 1  | 79   | 0. 28518 | 8. 373596191 | 1  |
| MSTRG. 28470. 2  | 79   | 0. 28518 | 8. 373596191 | 1  |
| MSTRG. 28471. 2  | 224  | 0. 29088 | 4. 221618652 | 1  |
| MSTRG. 28471. 3  | 224  | 0. 28503 | 4. 221618652 | 1  |
| MSTRG. 28474. 1  | 126  | 0. 36259 | 9. 058654785 | 1  |
| MSTRG. 28471. 4  | 139  | 0. 28267 | 9. 041564941 | 1  |
| MSTRG. 28476. 2  | 151  | 0. 37113 | 9. 711486816 | 1  |
| MSTRG. 28430. 1  | 60   | 0. 34559 | 6. 813049316 | 1  |
| MSTRG. 28430. 2  | 61   | 0. 30256 | 5. 270324707 | 1  |
| MSTRG. 28432. 1  | 164  | 0. 37576 | 8. 685119629 | 1  |
| MSTRG. 28433. 1  | 57   | 0. 34913 | 9. 899719238 | 1  |
| MSTRG. 28439. 1  | 820  | 0. 40563 | 7. 880310059 | 1  |
| MSTRG. 28443. 1  | 39   | 0. 34858 | 10. 28094482 | -1 |
| MSTRG. 28442. 2  | 317  | 0. 4184  | 5. 692077637 | 1  |
| MSTRG. 28445. 1  | 294  | 0. 35217 | 5. 608581543 | 1  |
| MSTRG. 28480. 2  | 30   | 0. 35828 | 9. 304016113 | -1 |
| MSTRG. 28480. 1  | 64   | 0. 33258 | 8. 931945801 | -1 |
| MSTRG. 28480. 3  | 189  | 0. 3582  | 10. 02838135 | 1  |
| MSTRG. 28481. 3  | 380  | 0. 36378 | 7. 503845215 | 1  |
| MSTRG. 28485. 1  | 112  | 0. 29367 | 9. 183898926 | 1  |
| MSTRG. 28485. 2  | 97   | 0. 29772 | 6. 395690918 | 1  |
| MSTRG. 28485. 3  | 145  | 0. 28923 | 9. 368103027 | 1  |
| MSTRG. 28485. 4  | 86   | 0. 30958 | 5. 721496582 | 1  |
| MSTRG. 28485. 5  | 86   | 0. 35421 | 5. 721496582 | 1  |
| MSTRG. 28485. 6  | 85   | 0. 3076  | 9. 067077637 | 1  |
| MSTRG. 28487. 2  | 261  | 0. 41541 | 4. 328186035 | 1  |
| MSTRG. 28487. 3  | 261  | 0. 40921 | 4. 328186035 | 1  |
| MSTRG. 28488. 1  | 1236 | 0. 43303 | 9. 473693848 | 1  |
| MSTRG. 28488. 2  | 1236 | 0. 39288 | 9. 473693848 | 1  |
| MSTRG. 28488. 3  | 1236 | 0. 40674 | 9. 473693848 | 1  |
| MSTRG. 28488. 4  | 1236 | 0. 43861 | 9. 473693848 | 1  |
| MSTRG. 28488. 5  | 1212 | 0. 32721 | 9. 522033691 | 1  |
| MSTRG. 28488. 7  | 186  | 0. 28167 | 7. 009216309 | 1  |
| MSTRG. 28489. 1  | 173  | 0. 27763 | 8. 461242676 | 1  |
| MSTRG. 28488. 8  | 126  | 0. 27782 | 8. 948181152 | 1  |

|                  |      |          |              |    |
|------------------|------|----------|--------------|----|
| MSTRG. 28488. 9  | 126  | 0. 27782 | 8. 948181152 | 1  |
| MSTRG. 28488. 10 | 126  | 0. 28851 | 8. 948181152 | 1  |
| MSTRG. 28488. 11 | 119  | 0. 27915 | 6. 795471191 | 1  |
| MSTRG. 28491. 1  | 101  | 0. 35961 | 9. 096618652 | -1 |
| MSTRG. 28492. 1  | 25   | 0. 35927 | 3. 998840332 | 1  |
| MSTRG. 28495. 1  | 83   | 0. 28648 | 10. 37994385 | 1  |
| MSTRG. 28495. 2  | 83   | 0. 28648 | 10. 37994385 | 1  |
| MSTRG. 28499. 3  | 249  | 0. 40265 | 6. 500427246 | 1  |
| MSTRG. 28501. 3  | 372  | 0. 36166 | 10. 00714111 | 1  |
| MSTRG. 28501. 4  | 89   | 0. 37067 | 8. 890563965 | 1  |
| MSTRG. 28502. 1  | 40   | 0. 47196 | 4. 601013184 | -1 |
| MSTRG. 28505. 3  | 310  | 0. 40593 | 8. 429382324 | 1  |
| MSTRG. 28509. 4  | 81   | 0. 35289 | 10. 78729248 | 1  |
| MSTRG. 28509. 5  | 129  | 0. 40045 | 9. 367248535 | 1  |
| MSTRG. 28509. 2  | 235  | 0. 40871 | 10. 45196533 | 1  |
| MSTRG. 28509. 3  | 86   | 0. 30813 | 9. 512268066 | 1  |
| MSTRG. 28510. 1  | 68   | 0. 36588 | 10. 76495361 | -1 |
| MSTRG. 28514. 5  | 1926 | 0. 446   | 8. 650939941 | 1  |
| MSTRG. 28515. 1  | 225  | 0. 37871 | 9. 55291748  | 1  |
| MSTRG. 28515. 2  | 225  | 0. 40865 | 9. 55291748  | 1  |
| MSTRG. 28515. 3  | 225  | 0. 40717 | 9. 55291748  | 1  |
| MSTRG. 28517. 1  | 43   | 0. 35902 | 9. 300598145 | 1  |
| MSTRG. 28517. 2  | 62   | 0. 43954 | 6. 520568848 | 1  |
| MSTRG. 28517. 3  | 43   | 0. 3553  | 9. 300598145 | 1  |
| MSTRG. 28517. 4  | 31   | 0. 30449 | 10. 02435303 | 1  |
| MSTRG. 28517. 5  | 31   | 0. 37221 | 10. 02435303 | 1  |
| MSTRG. 28520. 2  | 52   | 0. 3376  | 6. 546081543 | 1  |
| MSTRG. 28522. 2  | 264  | 0. 32831 | 9. 483093262 | 1  |
| MSTRG. 28522. 3  | 277  | 0. 37176 | 9. 602844238 | 1  |
| MSTRG. 28522. 4  | 277  | 0. 37046 | 9. 602844238 | 1  |
| MSTRG. 28522. 6  | 277  | 0. 3624  | 9. 602844238 | 1  |
| MSTRG. 28522. 8  | 277  | 0. 35584 | 9. 602844238 | 1  |
| MSTRG. 28525. 2  | 386  | 0. 42128 | 9. 369689941 | 1  |
| MSTRG. 28525. 3  | 382  | 0. 40182 | 9. 369689941 | 1  |
| MSTRG. 28532. 3  | 137  | 0. 35643 | 6. 409851074 | 1  |
| MSTRG. 28532. 5  | 79   | 0. 40125 | 8. 330505371 | 1  |
| MSTRG. 28533. 1  | 66   | 0. 29319 | 9. 438293457 | 1  |
| MSTRG. 28538. 2  | 2818 | 0. 41898 | 6. 385437012 | 1  |
| MSTRG. 28546. 1  | 767  | 0. 4758  | 5. 185974121 | 1  |
| MSTRG. 28546. 2  | 186  | 0. 39893 | 4. 084289551 | 1  |
| MSTRG. 28546. 3  | 459  | 0. 44225 | 5. 187927246 | 1  |
| MSTRG. 28546. 4  | 180  | 0. 39023 | 4. 029724121 | 1  |
| MSTRG. 28546. 12 | 372  | 0. 39303 | 4. 803161621 | 1  |
| MSTRG. 28546. 10 | 374  | 0. 44568 | 4. 81427002  | 1  |
| MSTRG. 28546. 8  | 467  | 0. 4559  | 5. 124938965 | 1  |
| MSTRG. 28539. 2  | 1691 | 0. 45482 | 6. 294494629 | 1  |
| MSTRG. 28539. 3  | 1691 | 0. 47598 | 6. 294494629 | 1  |
| MSTRG. 28539. 5  | 1691 | 0. 47598 | 6. 294494629 | 1  |
| MSTRG. 28539. 6  | 1691 | 0. 45295 | 6. 294494629 | 1  |
| MSTRG. 28539. 7  | 1691 | 0. 46065 | 6. 294494629 | 1  |
| MSTRG. 28539. 8  | 1745 | 0. 44113 | 6. 480651855 | 1  |
| MSTRG. 28550. 3  | 131  | 0. 27475 | 9. 594421387 | 1  |
| MSTRG. 28551. 1  | 132  | 0. 29152 | 9. 343444824 | 1  |
| MSTRG. 28552. 1  | 181  | 0. 28979 | 11. 5368042  | 1  |

|                  |     |          |              |    |
|------------------|-----|----------|--------------|----|
| MSTRG. 28553. 1  | 111 | 0. 28396 | 8. 801696777 | 1  |
| MSTRG. 28554. 1  | 87  | 0. 31915 | 10. 16680908 | 1  |
| MSTRG. 28555. 2  | 69  | 0. 35277 | 9. 452331543 | 1  |
| MSTRG. 28555. 3  | 40  | 0. 41941 | 10. 06085205 | 1  |
| MSTRG. 28556. 1  | 60  | 0. 28387 | 10. 08209229 | 1  |
| MSTRG. 28557. 1  | 66  | 0. 31621 | 8. 460388184 | 1  |
| MSTRG. 28555. 4  | 54  | 0. 3497  | 7. 662902832 | 1  |
| MSTRG. 28559. 1  | 117 | 0. 35682 | 9. 942077637 | 1  |
| MSTRG. 28561. 3  | 303 | 0. 30644 | 5. 29083252  | 1  |
| MSTRG. 28563. 1  | 567 | 0. 46586 | 9. 275085449 | 1  |
| MSTRG. 28563. 5  | 412 | 0. 45331 | 8. 808044434 | 1  |
| MSTRG. 28564. 1  | 102 | 0. 30945 | 6. 299499512 | 1  |
| MSTRG. 28565. 1  | 47  | 0. 32843 | 6. 693786621 | 1  |
| MSTRG. 28566. 1  | 133 | 0. 28707 | 9. 078918457 | 1  |
| MSTRG. 28567. 1  | 150 | 0. 28303 | 10. 53863525 | 1  |
| MSTRG. 28568. 1  | 50  | 0. 31572 | 5. 93536377  | 1  |
| MSTRG. 28571. 2  | 221 | 0. 40179 | 9. 885925293 | 1  |
| MSTRG. 28571. 3  | 143 | 0. 42048 | 9. 917663574 | 1  |
| MSTRG. 28572. 1  | 119 | 0. 33676 | 10. 12969971 | -1 |
| MSTRG. 28579. 2  | 405 | 0. 41686 | 8. 684020996 | 1  |
| MSTRG. 28586. 1  | 572 | 0. 44254 | 4. 910339355 | 1  |
| MSTRG. 28586. 3  | 470 | 0. 41794 | 4. 824157715 | 1  |
| MSTRG. 28586. 4  | 446 | 0. 41794 | 4. 709411621 | 1  |
| MSTRG. 28586. 5  | 446 | 0. 41794 | 4. 709411621 | 1  |
| MSTRG. 28587. 2  | 167 | 0. 43874 | 8. 746643066 | 1  |
| MSTRG. 28587. 3  | 133 | 0. 4097  | 6. 433288574 | 1  |
| MSTRG. 28588. 1  | 268 | 0. 33    | 6. 710632324 | 1  |
| MSTRG. 28590. 1  | 51  | 0. 34695 | 7. 777404785 | 1  |
| MSTRG. 28588. 2  | 84  | 0. 32823 | 9. 433898926 | -1 |
| MSTRG. 28594. 2  | 337 | 0. 45872 | 4. 906921387 | -1 |
| MSTRG. 28581. 2  | 392 | 0. 40266 | 5. 16192627  | 1  |
| MSTRG. 28585. 1  | 39  | 0. 4511  | 10. 34735107 | 1  |
| MSTRG. 28595. 1  | 40  | 0. 44972 | 8. 496398926 | 1  |
| MSTRG. 28600. 2  | 118 | 0. 37127 | 7. 009216309 | 1  |
| MSTRG. 28600. 3  | 267 | 0. 39505 | 8. 226989746 | 1  |
| MSTRG. 28600. 6  | 188 | 0. 28284 | 7. 708679199 | 1  |
| MSTRG. 28600. 5  | 283 | 0. 45993 | 7. 68572998  | 1  |
| MSTRG. 28600. 4  | 293 | 0. 42886 | 6. 518981934 | 1  |
| MSTRG. 28600. 7  | 100 | 0. 31834 | 9. 096740723 | 1  |
| MSTRG. 28600. 8  | 188 | 0. 39335 | 7. 708679199 | 1  |
| MSTRG. 28600. 9  | 283 | 0. 4699  | 7. 68572998  | 1  |
| MSTRG. 28602. 1  | 23  | 0. 39232 | 4. 783508301 | -1 |
| MSTRG. 28603. 1  | 173 | 0. 27251 | 9. 253723145 | 1  |
| MSTRG. 28604. 1  | 60  | 0. 32421 | 8. 682312012 | 1  |
| MSTRG. 28605. 1  | 26  | 0. 33194 | 7. 998840332 | 1  |
| MSTRG. 28606. 1  | 126 | 0. 31581 | 9. 230041504 | 1  |
| MSTRG. 28597. 1  | 78  | 0. 38463 | 9. 21697998  | 1  |
| MSTRG. 28613. 7  | 630 | 0. 41107 | 8. 664611816 | 1  |
| MSTRG. 28613. 6  | 924 | 0. 46175 | 6. 666809082 | 1  |
| MSTRG. 28613. 8  | 791 | 0. 37415 | 6. 738708496 | 1  |
| MSTRG. 28613. 9  | 791 | 0. 36029 | 6. 738708496 | 1  |
| MSTRG. 28613. 10 | 99  | 0. 30573 | 9. 66583252  | 1  |
| MSTRG. 28614. 1  | 114 | 0. 28751 | 9. 643615723 | 1  |
| MSTRG. 28609. 1  | 41  | 0. 42275 | 9. 186218262 | 1  |

|                 |      |          |              |    |
|-----------------|------|----------|--------------|----|
| MSTRG. 28618. 1 | 65   | 0. 36306 | 9. 101257324 | -1 |
| MSTRG. 28620. 4 | 1146 | 0. 45477 | 9. 108093262 | 1  |
| MSTRG. 28620. 3 | 1146 | 0. 45477 | 9. 108093262 | 1  |
| MSTRG. 28623. 2 | 292  | 0. 35969 | 9. 354553223 | 1  |
| MSTRG. 28625. 1 | 73   | 0. 32239 | 5. 035339355 | 1  |
| MSTRG. 28625. 2 | 142  | 0. 355   | 5. 531066895 | 1  |
| MSTRG. 28625. 3 | 142  | 0. 4326  | 5. 531066895 | 1  |
| MSTRG. 28625. 4 | 73   | 0. 36473 | 5. 035339355 | 1  |
| MSTRG. 28627. 4 | 842  | 0. 43565 | 5. 269470215 | 1  |
| MSTRG. 28627. 3 | 932  | 0. 40843 | 5. 29498291  | 1  |
| MSTRG. 28627. 5 | 816  | 0. 42817 | 5. 119445801 | 1  |
| MSTRG. 28628. 1 | 242  | 0. 31822 | 10. 9788208  | 1  |
| MSTRG. 28631. 2 | 207  | 0. 33059 | 10. 54241943 | 1  |
| MSTRG. 28631. 3 | 180  | 0. 28338 | 10. 12054443 | 1  |
| MSTRG. 28633. 1 | 63   | 0. 38195 | 9. 521179199 | 1  |
| MSTRG. 28642. 2 | 1841 | 0. 4871  | 8. 632263184 | 1  |
| MSTRG. 28642. 8 | 1086 | 0. 41744 | 8. 57244873  | -1 |
| MSTRG. 28642. 7 | 1100 | 0. 37404 | 8. 46661377  | -1 |
| MSTRG. 28642. 5 | 1574 | 0. 41633 | 8. 643371582 | -1 |
| MSTRG. 28642. 6 | 1588 | 0. 41616 | 8. 589538574 | -1 |
| MSTRG. 28642. 3 | 1588 | 0. 41323 | 8. 589538574 | -1 |
| MSTRG. 28638. 1 | 30   | 0. 39096 | 10. 05230713 | 1  |
| MSTRG. 28638. 2 | 85   | 0. 33951 | 8. 46673584  | 1  |
| MSTRG. 28644. 1 | 119  | 0. 27678 | 10. 48980713 | 1  |
| MSTRG. 28645. 2 | 1071 | 0. 33224 | 9. 403137207 | 1  |
| MSTRG. 28646. 3 | 63   | 0. 36459 | 11. 88189697 | -1 |
| MSTRG. 28646. 4 | 63   | 0. 28255 | 11. 88189697 | -1 |
| MSTRG. 28646. 5 | 63   | 0. 37345 | 11. 88189697 | -1 |
| MSTRG. 28647. 1 | 172  | 0. 27274 | 6. 96270752  | 1  |
| MSTRG. 28648. 1 | 114  | 0. 33337 | 9. 127502441 | 1  |
| MSTRG. 28648. 2 | 114  | 0. 33742 | 9. 127502441 | 1  |
| MSTRG. 28648. 3 | 149  | 0. 30449 | 9. 127624512 | 1  |
| MSTRG. 28650. 1 | 67   | 0. 32907 | 9. 831115723 | 1  |
| MSTRG. 28650. 3 | 58   | 0. 41185 | 4. 661437988 | 1  |
| MSTRG. 28650. 2 | 58   | 0. 32646 | 4. 661437988 | 1  |
| MSTRG. 28652. 1 | 17   | 0. 28519 | 5. 585388184 | 1  |
| MSTRG. 28653. 1 | 821  | 0. 47977 | 8. 824157715 | 1  |
| MSTRG. 28654. 1 | 120  | 0. 32966 | 9. 825256348 | 1  |
| MSTRG. 28656. 1 | 26   | 0. 46851 | 10. 7366333  | 1  |
| MSTRG. 28657. 3 | 2209 | 0. 45118 | 6. 220031738 | 1  |
| MSTRG. 28658. 1 | 84   | 0. 37841 | 7. 662536621 | 1  |
| MSTRG. 28662. 4 | 510  | 0. 46717 | 5. 41229248  | 1  |
| MSTRG. 28662. 3 | 475  | 0. 46114 | 5. 597229004 | 1  |
| MSTRG. 28661. 1 | 95   | 0. 39407 | 9. 363098145 | 1  |
| MSTRG. 28661. 2 | 95   | 0. 44959 | 9. 363098145 | 1  |
| MSTRG. 28663. 1 | 678  | 0. 43462 | 9. 653625488 | 1  |
| MSTRG. 28663. 2 | 678  | 0. 39821 | 9. 653625488 | 1  |
| MSTRG. 28669. 2 | 106  | 0. 2997  | 10. 21612549 | 1  |
| MSTRG. 28672. 1 | 36   | 0. 36277 | 11. 45159912 | 1  |
| MSTRG. 28672. 2 | 36   | 0. 42557 | 11. 45159912 | 1  |
| MSTRG. 28672. 3 | 40   | 0. 34478 | 8. 842346191 | 1  |
| MSTRG. 28677. 1 | 50   | 0. 33182 | 11. 54217529 | 1  |
| MSTRG. 28677. 2 | 50   | 0. 43069 | 11. 54217529 | 1  |
| MSTRG. 28682. 2 | 2228 | 0. 48069 | 6. 462585449 | 1  |

|                 |      |          |              |    |
|-----------------|------|----------|--------------|----|
| MSTRG. 28688. 2 | 112  | 0. 32177 | 7. 832336426 | 1  |
| MSTRG. 28693. 1 | 51   | 0. 36554 | 6. 889465332 | 1  |
| MSTRG. 28702. 1 | 46   | 0. 34297 | 10. 10577393 | 1  |
| MSTRG. 28705. 1 | 10   | 0. 36406 | 5. 274963379 | 1  |
| MSTRG. 28707. 1 | 63   | 0. 40763 | 8. 768249512 | 1  |
| MSTRG. 28712. 2 | 86   | 0. 43444 | 10. 86114502 | -1 |
| MSTRG. 28712. 3 | 11   | 0. 40733 | 12. 480896   | 1  |
| MSTRG. 28714. 1 | 22   | 0. 32838 | 8. 18939209  | 1  |
| MSTRG. 28716. 1 | 107  | 0. 31279 | 4. 788513184 | 1  |
| MSTRG. 28718. 2 | 788  | 0. 46525 | 6. 734680176 | 1  |
| MSTRG. 28715. 1 | 54   | 0. 29796 | 9. 497253418 | -1 |
| MSTRG. 28720. 1 | 64   | 0. 43974 | 9. 032897949 | 1  |
| MSTRG. 28731. 1 | 36   | 0. 38801 | 4. 698059082 | 1  |
| MSTRG. 28732. 1 | 105  | 0. 32346 | 4. 821350098 | 1  |
| MSTRG. 28742. 4 | 361  | 0. 40446 | 8. 85369873  | 1  |
| MSTRG. 28743. 1 | 34   | 0. 37641 | 9. 188293457 | 1  |
| MSTRG. 28744. 1 | 159  | 0. 31437 | 11. 6572876  | 1  |
| MSTRG. 28745. 1 | 225  | 0. 37015 | 8. 912414551 | 1  |
| MSTRG. 28745. 3 | 77   | 0. 30312 | 7. 725158691 | 1  |
| MSTRG. 28745. 5 | 225  | 0. 30421 | 8. 912414551 | 1  |
| MSTRG. 28746. 1 | 1201 | 0. 4378  | 5. 636901855 | 1  |
| MSTRG. 28746. 3 | 1336 | 0. 42084 | 5. 602722168 | 1  |
| MSTRG. 28746. 4 | 95   | 0. 3062  | 6. 707214355 | 1  |
| MSTRG. 28746. 5 | 245  | 0. 36806 | 4. 555969238 | 1  |
| MSTRG. 28737. 2 | 746  | 0. 44876 | 5. 77154541  | 1  |
| MSTRG. 28737. 3 | 628  | 0. 47104 | 5. 123718262 | 1  |
| MSTRG. 28739. 3 | 168  | 0. 34157 | 8. 465759277 | 1  |
| MSTRG. 28739. 4 | 168  | 0. 43035 | 8. 465759277 | 1  |
| MSTRG. 28739. 5 | 173  | 0. 2921  | 9. 833068848 | 1  |
| MSTRG. 28739. 6 | 85   | 0. 32072 | 6. 127746582 | 1  |
| MSTRG. 28740. 1 | 69   | 0. 30934 | 9. 428161621 | 1  |
| MSTRG. 28755. 1 | 42   | 0. 41594 | 10. 50701904 | 1  |
| MSTRG. 28765. 1 | 101  | 0. 34544 | 9. 144958496 | 1  |
| MSTRG. 28770. 1 | 368  | 0. 29772 | 5. 826843262 | 1  |
| MSTRG. 28770. 3 | 368  | 0. 3     | 5. 826843262 | 1  |
| MSTRG. 28780. 1 | 460  | 0. 32305 | 4. 83026123  | 1  |
| MSTRG. 28780. 3 | 460  | 0. 35395 | 4. 83026123  | 1  |
| MSTRG. 28784. 1 | 2200 | 0. 42351 | 5. 642028809 | 1  |
| MSTRG. 28784. 2 | 2200 | 0. 44992 | 5. 642028809 | 1  |
| MSTRG. 28783. 1 | 70   | 0. 36976 | 10. 37384033 | 1  |
| MSTRG. 28790. 1 | 31   | 0. 384   | 8. 274963379 | 1  |
| MSTRG. 28790. 2 | 34   | 0. 40078 | 4. 96661377  | 1  |
| MSTRG. 28794. 1 | 54   | 0. 33004 | 6. 520324707 | 1  |
| MSTRG. 28799. 2 | 943  | 0. 48731 | 4. 943054199 | 1  |
| MSTRG. 28822. 1 | 86   | 0. 3351  | 10. 09942627 | -1 |
| MSTRG. 28830. 1 | 44   | 0. 37095 | 6. 89666748  | 1  |
| MSTRG. 28839. 1 | 864  | 0. 46542 | 9. 683166504 | 1  |
| MSTRG. 28839. 2 | 864  | 0. 48849 | 9. 683166504 | 1  |
| MSTRG. 28839. 4 | 251  | 0. 4031  | 9. 25567627  | 1  |
| MSTRG. 28842. 1 | 85   | 0. 30242 | 9. 860290527 | 1  |
| MSTRG. 28844. 6 | 363  | 0. 38993 | 6. 07244873  | 1  |
| MSTRG. 28844. 5 | 328  | 0. 37265 | 7. 147644043 | 1  |
| MSTRG. 28846. 3 | 255  | 0. 39079 | 5. 730651855 | 1  |
| MSTRG. 28853. 2 | 950  | 0. 43999 | 5. 907409668 | 1  |



|                  |      |          |              |    |
|------------------|------|----------|--------------|----|
| MSTRG. 28853. 3  | 950  | 0. 34615 | 5. 907409668 | 1  |
| MSTRG. 28853. 5  | 950  | 0. 46459 | 5. 907409668 | 1  |
| MSTRG. 28853. 6  | 134  | 0. 3614  | 8. 622131348 | 1  |
| MSTRG. 28854. 1  | 40   | 0. 32702 | 8. 503845215 | -1 |
| MSTRG. 28853. 10 | 189  | 0. 34904 | 10. 23907471 | 1  |
| MSTRG. 28853. 9  | 568  | 0. 44304 | 5. 527282715 | 1  |
| MSTRG. 28856. 1  | 132  | 0. 28096 | 9. 097595215 | 1  |
| MSTRG. 28857. 6  | 382  | 0. 49172 | 8. 257019043 | 1  |
| MSTRG. 28857. 5  | 454  | 0. 45874 | 4. 879333496 | 1  |
| MSTRG. 28857. 8  | 454  | 0. 45926 | 4. 879333496 | 1  |
| MSTRG. 28857. 7  | 283  | 0. 46567 | 5. 60760498  | 1  |
| MSTRG. 28858. 2  | 266  | 0. 3787  | 8. 402160645 | 1  |
| MSTRG. 28859. 1  | 132  | 0. 28338 | 8. 282653809 | 1  |
| MSTRG. 28862. 2  | 3005 | 0. 39689 | 6. 35760498  | 1  |
| MSTRG. 28862. 3  | 2958 | 0. 39255 | 6. 294128418 | 1  |
| MSTRG. 28862. 4  | 1899 | 0. 43588 | 7. 475646973 | 1  |
| MSTRG. 28862. 5  | 3005 | 0. 42164 | 6. 35760498  | 1  |
| MSTRG. 28862. 6  | 2115 | 0. 39475 | 7. 236999512 | 1  |
| MSTRG. 28862. 7  | 219  | 0. 37733 | 8. 86907959  | 1  |
| MSTRG. 28860. 2  | 244  | 0. 3208  | 6. 514831543 | 1  |
| MSTRG. 28866. 2  | 889  | 0. 47416 | 6. 192199707 | 1  |
| MSTRG. 28866. 3  | 80   | 0. 41248 | 10. 41558838 | 1  |
| MSTRG. 28869. 1  | 19   | 0. 42967 | 6. 505310059 | 1  |
| MSTRG. 28879. 1  | 119  | 0. 3351  | 11. 56414795 | 1  |
| MSTRG. 28879. 4  | 112  | 0. 40447 | 11. 456604   | 1  |
| MSTRG. 28879. 3  | 112  | 0. 32366 | 11. 456604   | 1  |
| MSTRG. 28879. 5  | 112  | 0. 41264 | 11. 456604   | 1  |
| MSTRG. 28880. 1  | 841  | 0. 29607 | 9. 229675293 | 1  |
| MSTRG. 28880. 3  | 728  | 0. 41761 | 9. 252258301 | -1 |
| MSTRG. 28880. 2  | 702  | 0. 32307 | 9. 300231934 | 1  |
| MSTRG. 28880. 4  | 728  | 0. 43099 | 9. 252258301 | -1 |
| MSTRG. 28882. 1  | 96   | 0. 33467 | 9. 770568848 | 1  |
| MSTRG. 28883. 1  | 177  | 0. 28199 | 10. 02020264 | 1  |
| MSTRG. 28884. 1  | 57   | 0. 3443  | 10. 02435303 | 1  |
| MSTRG. 28885. 2  | 130  | 0. 42218 | 6. 691589355 | 1  |
| MSTRG. 28885. 3  | 130  | 0. 42988 | 6. 691589355 | 1  |
| MSTRG. 28886. 2  | 933  | 0. 4431  | 6. 131896973 | 1  |
| MSTRG. 28887. 1  | 494  | 0. 38676 | 5. 150939941 | 1  |
| MSTRG. 28887. 2  | 449  | 0. 39252 | 5. 16204834  | 1  |
| MSTRG. 28887. 4  | 449  | 0. 33686 | 5. 16204834  | 1  |
| MSTRG. 28888. 1  | 657  | 0. 4021  | 4. 892150879 | 1  |
| MSTRG. 28873. 1  | 68   | 0. 36752 | 10. 42474365 | 1  |
| MSTRG. 28876. 1  | 375  | 0. 4076  | 4. 68170166  | 1  |
| MSTRG. 28890. 1  | 316  | 0. 40331 | 5. 870788574 | 1  |
| MSTRG. 28890. 5  | 316  | 0. 44798 | 5. 870788574 | 1  |
| MSTRG. 28890. 6  | 313  | 0. 45238 | 6. 003967285 | 1  |
| MSTRG. 28890. 4  | 316  | 0. 43165 | 5. 870788574 | 1  |
| MSTRG. 28890. 3  | 316  | 0. 35893 | 5. 870788574 | 1  |
| MSTRG. 28893. 1  | 52   | 0. 30237 | 9. 221862793 | 1  |
| MSTRG. 28892. 2  | 277  | 0. 34426 | 9. 833679199 | 1  |
| MSTRG. 28894. 1  | 29   | 0. 36539 | 8. 211242676 | 1  |
| MSTRG. 28894. 2  | 29   | 0. 41298 | 6. 695495605 | 1  |
| MSTRG. 28900. 3  | 470  | 0. 42005 | 6. 830871582 | 1  |
| MSTRG. 28905. 2  | 858  | 0. 40758 | 5. 846740723 | 1  |

|                  |      |          |              |    |
|------------------|------|----------|--------------|----|
| MSTRG. 28907. 1  | 172  | 0. 48147 | 4. 671569824 | 1  |
| MSTRG. 28908. 1  | 71   | 0. 30653 | 9. 69732666  | 1  |
| MSTRG. 28914. 1  | 87   | 0. 34711 | 5. 344543457 | 1  |
| MSTRG. 28914. 2  | 977  | 0. 45807 | 6. 749328613 | 1  |
| MSTRG. 28914. 3  | 427  | 0. 47206 | 5. 141418457 | 1  |
| MSTRG. 28917. 1  | 102  | 0. 34028 | 6. 248840332 | 1  |
| MSTRG. 28920. 1  | 67   | 0. 30816 | 6. 475402832 | 1  |
| MSTRG. 28923. 4  | 854  | 0. 44594 | 5. 03338623  | 1  |
| MSTRG. 28923. 3  | 872  | 0. 4352  | 5. 022644043 | 1  |
| MSTRG. 28923. 5  | 854  | 0. 4352  | 5. 03338623  | 1  |
| MSTRG. 28923. 7  | 854  | 0. 44906 | 5. 03338623  | 1  |
| MSTRG. 28923. 6  | 913  | 0. 44906 | 5. 02166748  | 1  |
| MSTRG. 28923. 8  | 872  | 0. 44594 | 5. 022644043 | 1  |
| MSTRG. 28934. 1  | 75   | 0. 30396 | 10. 418396   | 1  |
| MSTRG. 28935. 1  | 118  | 0. 31454 | 7. 92755127  | 1  |
| MSTRG. 28936. 1  | 163  | 0. 29526 | 9. 820495605 | 1  |
| MSTRG. 28937. 1  | 58   | 0. 42974 | 8. 72454834  | 1  |
| MSTRG. 28933. 3  | 141  | 0. 33979 | 10. 39129639 | 1  |
| MSTRG. 28941. 1  | 106  | 0. 32619 | 8. 262145996 | 1  |
| MSTRG. 28942. 1  | 144  | 0. 28015 | 11. 13897705 | 1  |
| MSTRG. 28940. 4  | 705  | 0. 35356 | 6. 121276855 | 1  |
| MSTRG. 28949. 2  | 242  | 0. 46078 | 6. 001281738 | 1  |
| MSTRG. 28949. 4  | 152  | 0. 45001 | 5. 881896973 | 1  |
| MSTRG. 28951. 2  | 177  | 0. 28842 | 9. 765686035 | 1  |
| MSTRG. 28951. 1  | 1677 | 0. 46624 | 6. 957702637 | 1  |
| MSTRG. 28951. 6  | 298  | 0. 39742 | 8. 832580566 | 1  |
| MSTRG. 28951. 5  | 321  | 0. 38511 | 8. 274719238 | 1  |
| MSTRG. 28952. 1  | 119  | 0. 34547 | 8. 370422363 | 1  |
| MSTRG. 28953. 1  | 51   | 0. 39159 | 9. 649597168 | 1  |
| MSTRG. 28947. 1  | 635  | 0. 49189 | 5. 69732666  | 1  |
| MSTRG. 28961. 6  | 893  | 0. 44207 | 4. 760925293 | 1  |
| MSTRG. 28961. 8  | 706  | 0. 39436 | 4. 780212402 | 1  |
| MSTRG. 28961. 4  | 894  | 0. 44574 | 4. 760925293 | 1  |
| MSTRG. 28961. 5  | 894  | 0. 44574 | 4. 760925293 | 1  |
| MSTRG. 28961. 3  | 919  | 0. 48974 | 4. 655822754 | 1  |
| MSTRG. 28961. 7  | 936  | 0. 48974 | 4. 61529541  | 1  |
| MSTRG. 28961. 10 | 929  | 0. 42718 | 4. 690490723 | 1  |
| MSTRG. 28961. 12 | 893  | 0. 44263 | 4. 760925293 | 1  |
| MSTRG. 28961. 9  | 893  | 0. 4829  | 4. 760925293 | 1  |
| MSTRG. 28961. 13 | 158  | 0. 31241 | 10. 4130249  | -1 |
| MSTRG. 28961. 14 | 56   | 0. 34301 | 4. 195983887 | 1  |
| MSTRG. 28961. 15 | 40   | 0. 31214 | 4. 195983887 | -1 |
| MSTRG. 28961. 16 | 40   | 0. 40304 | 4. 195983887 | -1 |
| MSTRG. 28963. 1  | 204  | 0. 35925 | 5. 985290527 | 1  |
| MSTRG. 28967. 1  | 124  | 0. 391   | 9. 653137207 | 1  |
| MSTRG. 28975. 1  | 77   | 0. 36473 | 9. 980041504 | -1 |
| MSTRG. 28980. 2  | 349  | 0. 2785  | 9. 684631348 | -1 |
| MSTRG. 28976. 2  | 99   | 0. 42347 | 5. 674743652 | 1  |
| MSTRG. 28976. 3  | 99   | 0. 45443 | 5. 674743652 | 1  |
| MSTRG. 28977. 1  | 85   | 0. 31138 | 8. 714172363 | 1  |
| MSTRG. 28976. 4  | 89   | 0. 38843 | 10. 77496338 | 1  |
| MSTRG. 28987. 2  | 150  | 0. 28964 | 8. 976867676 | 1  |
| MSTRG. 28988. 2  | 723  | 0. 43019 | 8. 69708252  | 1  |
| MSTRG. 28988. 3  | 774  | 0. 42916 | 8. 967590332 | 1  |

|                  |      |          |              |    |
|------------------|------|----------|--------------|----|
| MSTRG. 28990. 1  | 178  | 0. 3598  | 8. 626403809 | 1  |
| MSTRG. 28988. 4  | 245  | 0. 4215  | 4. 875061035 | 1  |
| MSTRG. 28988. 5  | 665  | 0. 43646 | 5. 957946777 | 1  |
| MSTRG. 28988. 6  | 617  | 0. 34711 | 6. 053161621 | 1  |
| MSTRG. 28988. 8  | 474  | 0. 39802 | 6. 108703613 | 1  |
| MSTRG. 28988. 9  | 585  | 0. 37021 | 6. 102233887 | 1  |
| MSTRG. 28988. 10 | 654  | 0. 48543 | 6. 106872559 | 1  |
| MSTRG. 28988. 11 | 662  | 0. 43881 | 6. 190734863 | 1  |
| MSTRG. 28988. 12 | 473  | 0. 40143 | 6. 040100098 | 1  |
| MSTRG. 28993. 2  | 246  | 0. 38772 | 6. 109436035 | 1  |
| MSTRG. 28993. 3  | 224  | 0. 40379 | 6. 432678223 | 1  |
| MSTRG. 29016. 1  | 71   | 0. 3519  | 12. 00701904 | 1  |
| MSTRG. 29017. 8  | 235  | 0. 3616  | 8. 530822754 | 1  |
| MSTRG. 29017. 9  | 2699 | 0. 47109 | 5. 336120605 | 1  |
| MSTRG. 29017. 10 | 235  | 0. 3917  | 8. 530822754 | 1  |
| MSTRG. 29017. 12 | 296  | 0. 39464 | 8. 151428223 | 1  |
| MSTRG. 29017. 13 | 239  | 0. 33246 | 8. 219421387 | 1  |
| MSTRG. 29017. 11 | 2745 | 0. 46801 | 5. 350891113 | 1  |
| MSTRG. 29000. 1  | 52   | 0. 28085 | 11. 61004639 | 1  |
| MSTRG. 29008. 1  | 143  | 0. 30092 | 8. 586975098 | 1  |
| MSTRG. 29009. 1  | 154  | 0. 27678 | 6. 41217041  | 1  |
| MSTRG. 29013. 3  | 183  | 0. 29367 | 10. 831604   | 1  |
| MSTRG. 28996. 1  | 79   | 0. 36192 | 9. 776062012 | 1  |
| MSTRG. 29020. 2  | 1595 | 0. 40707 | 9. 751037598 | 1  |
| MSTRG. 29020. 3  | 311  | 0. 34908 | 6. 137268066 | -1 |
| MSTRG. 29021. 1  | 134  | 0. 28698 | 10. 1651001  | 1  |
| MSTRG. 29022. 1  | 27   | 0. 41777 | 4. 027648926 | 1  |
| MSTRG. 29019. 1  | 26   | 0. 38121 | 7. 975524902 | 1  |
| MSTRG. 29024. 2  | 123  | 0. 28036 | 8. 721252441 | 1  |
| MSTRG. 29024. 4  | 123  | 0. 28036 | 8. 721252441 | 1  |
| MSTRG. 29028. 3  | 2499 | 0. 47075 | 5. 889221191 | 1  |
| MSTRG. 29026. 3  | 171  | 0. 33531 | 5. 484069824 | 1  |
| MSTRG. 29027. 1  | 55   | 0. 37842 | 10. 02825928 | 1  |
| MSTRG. 29029. 1  | 278  | 0. 46455 | 5. 327331543 | 1  |
| MSTRG. 29034. 1  | 183  | 0. 33031 | 9. 465026855 | 1  |
| MSTRG. 29035. 1  | 669  | 0. 40235 | 5. 359558105 | 1  |
| MSTRG. 29037. 1  | 72   | 0. 42248 | 11. 46881104 | 1  |
| MSTRG. 29041. 1  | 278  | 0. 27433 | 5. 872375488 | 1  |
| MSTRG. 29041. 5  | 559  | 0. 41098 | 8. 57208252  | 1  |
| MSTRG. 29041. 4  | 612  | 0. 37692 | 8. 208068848 | 1  |
| MSTRG. 29041. 7  | 563  | 0. 4334  | 8. 656433105 | 1  |
| MSTRG. 29043. 1  | 170  | 0. 37965 | 8. 807556152 | 1  |
| MSTRG. 29043. 2  | 144  | 0. 38295 | 8. 621276855 | 1  |
| MSTRG. 29043. 3  | 144  | 0. 30898 | 8. 621276855 | 1  |
| MSTRG. 29045. 1  | 537  | 0. 46669 | 7. 211975098 | 1  |
| MSTRG. 29049. 4  | 59   | 0. 4022  | 5. 34197998  | 1  |
| MSTRG. 29051. 2  | 48   | 0. 43789 | 6. 892150879 | 1  |
| MSTRG. 29054. 4  | 467  | 0. 28165 | 6. 133483887 | 1  |
| MSTRG. 29054. 5  | 467  | 0. 27937 | 6. 133483887 | 1  |
| MSTRG. 29055. 1  | 96   | 0. 28165 | 6. 472961426 | 1  |
| MSTRG. 29064. 3  | 499  | 0. 44803 | 6. 885925293 | 1  |
| MSTRG. 29064. 4  | 375  | 0. 30721 | 7. 044250488 | 1  |
| MSTRG. 29064. 6  | 328  | 0. 45512 | 9. 699890137 | 1  |
| MSTRG. 29065. 1  | 88   | 0. 32799 | 6. 569152832 | 1  |

|                  |      |          |              |    |
|------------------|------|----------|--------------|----|
| MSTRG. 29065. 2  | 85   | 0. 40951 | 11. 65460205 | 1  |
| MSTRG. 29068. 1  | 76   | 0. 34519 | 9. 405700684 | 1  |
| MSTRG. 29068. 3  | 76   | 0. 35913 | 9. 405700684 | 1  |
| MSTRG. 29079. 2  | 32   | 0. 47297 | 4. 129821777 | 1  |
| MSTRG. 29079. 1  | 1828 | 0. 41941 | 7. 797424316 | 1  |
| MSTRG. 29079. 4  | 69   | 0. 32959 | 4. 88079834  | 1  |
| MSTRG. 29079. 3  | 1689 | 0. 41941 | 8. 456115723 | 1  |
| MSTRG. 29079. 5  | 1820 | 0. 41941 | 7. 547302246 | 1  |
| MSTRG. 29080. 1  | 154  | 0. 33737 | 5. 766662598 | 1  |
| MSTRG. 29086. 2  | 511  | 0. 48084 | 8. 70501709  | 1  |
| MSTRG. 29086. 3  | 445  | 0. 45349 | 8. 696228027 | 1  |
| MSTRG. 29082. 3  | 610  | 0. 45155 | 8. 959289551 | 1  |
| MSTRG. 29082. 4  | 619  | 0. 45434 | 8. 950256348 | 1  |
| MSTRG. 29083. 1  | 82   | 0. 35907 | 10. 11505127 | 1  |
| MSTRG. 29085. 1  | 250  | 0. 48001 | 5. 785339355 | -1 |
| MSTRG. 29092. 2  | 263  | 0. 38698 | 9. 93145752  | 1  |
| MSTRG. 29092. 6  | 263  | 0. 38264 | 9. 93145752  | 1  |
| MSTRG. 29092. 7  | 263  | 0. 35673 | 9. 93145752  | 1  |
| MSTRG. 29092. 5  | 263  | 0. 39202 | 9. 93145752  | 1  |
| MSTRG. 29093. 4  | 408  | 0. 48588 | 5. 562927246 | 1  |
| MSTRG. 29094. 1  | 123  | 0. 44496 | 10. 80352783 | -1 |
| MSTRG. 29099. 2  | 372  | 0. 35249 | 6. 317199707 | 1  |
| MSTRG. 29101. 1  | 224  | 0. 30837 | 8. 590637207 | 1  |
| MSTRG. 29101. 2  | 73   | 0. 29919 | 6. 946838379 | 1  |
| MSTRG. 29107. 1  | 44   | 0. 28572 | 9. 692443848 | 1  |
| MSTRG. 29108. 1  | 79   | 0. 40397 | 10. 12921143 | -1 |
| MSTRG. 29111. 3  | 247  | 0. 36937 | 11. 35675049 | 1  |
| MSTRG. 29111. 4  | 247  | 0. 41591 | 11. 35675049 | 1  |
| MSTRG. 29111. 2  | 327  | 0. 38323 | 11. 16680908 | 1  |
| MSTRG. 29120. 3  | 226  | 0. 34647 | 9. 401306152 | 1  |
| MSTRG. 29120. 4  | 174  | 0. 36805 | 9. 081115723 | 1  |
| MSTRG. 29121. 1  | 529  | 0. 34952 | 8. 34197998  | 1  |
| MSTRG. 29121. 3  | 519  | 0. 42553 | 8. 046447754 | 1  |
| MSTRG. 29113. 1  | 53   | 0. 36833 | 9. 880187988 | 1  |
| MSTRG. 29115. 1  | 39   | 0. 36153 | 6. 530090332 | 1  |
| MSTRG. 29128. 1  | 78   | 0. 30824 | 9. 138244629 | 1  |
| MSTRG. 29129. 1  | 60   | 0. 38066 | 11. 28765869 | 1  |
| MSTRG. 29129. 2  | 49   | 0. 37367 | 5. 464660645 | 1  |
| MSTRG. 29130. 1  | 101  | 0. 31109 | 10. 43682861 | 1  |
| MSTRG. 29122. 1  | 90   | 0. 45907 | 6. 068664551 | -1 |
| MSTRG. 29126. 1  | 20   | 0. 43668 | 9. 497619629 | -1 |
| MSTRG. 29133. 1  | 58   | 0. 42613 | 9. 817077637 | 1  |
| MSTRG. 29136. 2  | 1454 | 0. 42723 | 6. 577819824 | 1  |
| MSTRG. 29136. 5  | 1479 | 0. 45087 | 6. 638244629 | 1  |
| MSTRG. 29136. 1  | 1454 | 0. 4309  | 6. 577819824 | 1  |
| MSTRG. 29137. 1  | 87   | 0. 43819 | 9. 644836426 | 1  |
| MSTRG. 29155. 4  | 750  | 0. 44085 | 5. 480285645 | 1  |
| MSTRG. 29155. 6  | 750  | 0. 43265 | 5. 480285645 | 1  |
| MSTRG. 29155. 1  | 834  | 0. 33947 | 5. 68182373  | 1  |
| MSTRG. 29155. 8  | 834  | 0. 33947 | 5. 68182373  | 1  |
| MSTRG. 29155. 11 | 582  | 0. 39179 | 5. 474914551 | 1  |
| MSTRG. 29155. 15 | 370  | 0. 37624 | 5. 889099121 | 1  |
| MSTRG. 29155. 16 | 834  | 0. 33947 | 5. 68182373  | 1  |
| MSTRG. 29155. 17 | 834  | 0. 38512 | 5. 68182373  | 1  |

|                  |      |          |              |    |
|------------------|------|----------|--------------|----|
| MSTRG. 29155. 19 | 370  | 0. 46083 | 5. 889099121 | 1  |
| MSTRG. 29157. 1  | 338  | 0. 35765 | 8. 813049316 | 1  |
| MSTRG. 29155. 22 | 345  | 0. 46661 | 5. 147644043 | 1  |
| MSTRG. 29160. 1  | 92   | 0. 35155 | 8. 556945801 | 1  |
| MSTRG. 29161. 1  | 50   | 0. 34461 | 8. 522399902 | 1  |
| MSTRG. 29142. 1  | 125  | 0. 34656 | 9. 72442627  | 1  |
| MSTRG. 29143. 1  | 58   | 0. 41001 | 6. 518615723 | 1  |
| MSTRG. 29144. 3  | 475  | 0. 33747 | 5. 683898926 | 1  |
| MSTRG. 29149. 2  | 1301 | 0. 49349 | 8. 972106934 | 1  |
| MSTRG. 29149. 8  | 1159 | 0. 46648 | 8. 967102051 | 1  |
| MSTRG. 29149. 9  | 265  | 0. 35617 | 9. 274841309 | 1  |
| MSTRG. 29149. 10 | 244  | 0. 41498 | 9. 156921387 | 1  |
| MSTRG. 29149. 11 | 250  | 0. 39243 | 9. 168029785 | 1  |
| MSTRG. 29150. 1  | 515  | 0. 37002 | 6. 122619629 | 1  |
| MSTRG. 29150. 2  | 518  | 0. 37112 | 6. 122619629 | 1  |
| MSTRG. 29150. 3  | 518  | 0. 39195 | 6. 122619629 | 1  |
| MSTRG. 29150. 4  | 496  | 0. 37277 | 6. 169006348 | 1  |
| MSTRG. 29150. 5  | 518  | 0. 4568  | 6. 122619629 | 1  |
| MSTRG. 29150. 6  | 515  | 0. 36347 | 6. 122619629 | 1  |
| MSTRG. 29150. 7  | 518  | 0. 41763 | 6. 122619629 | 1  |
| MSTRG. 29150. 8  | 518  | 0. 4583  | 6. 122619629 | 1  |
| MSTRG. 29165. 3  | 237  | 0. 4023  | 10. 25323486 | 1  |
| MSTRG. 29162. 1  | 88   | 0. 40213 | 10. 63983154 | 1  |
| MSTRG. 29162. 2  | 98   | 0. 30112 | 11. 10479736 | 1  |
| MSTRG. 29163. 1  | 20   | 0. 39807 | 9. 304016113 | 1  |
| MSTRG. 29172. 1  | 19   | 0. 34464 | 9. 261535645 | 1  |
| MSTRG. 29191. 1  | 171  | 0. 36196 | 7. 657653809 | 1  |
| MSTRG. 29192. 1  | 81   | 0. 34173 | 10. 76495361 | 1  |
| MSTRG. 29195. 1  | 135  | 0. 33355 | 10. 3180542  | 1  |
| MSTRG. 29195. 2  | 95   | 0. 32759 | 6. 153503418 | 1  |
| MSTRG. 29195. 3  | 44   | 0. 32485 | 10. 19195557 | 1  |
| MSTRG. 29195. 4  | 44   | 0. 35076 | 10. 19195557 | 1  |
| MSTRG. 29201. 1  | 6    | 0. 46632 | 8. 34576416  | 1  |
| MSTRG. 29202. 4  | 593  | 0. 32076 | 4. 835876465 | 1  |
| MSTRG. 29202. 6  | 438  | 0. 41832 | 5. 745544434 | 1  |
| MSTRG. 29202. 7  | 438  | 0. 34952 | 5. 745544434 | 1  |
| MSTRG. 29202. 8  | 282  | 0. 46612 | 6. 067687988 | 1  |
| MSTRG. 29202. 9  | 129  | 0. 30483 | 5. 510437012 | 1  |
| MSTRG. 29196. 1  | 83   | 0. 38646 | 9. 476867676 | 1  |
| MSTRG. 29198. 1  | 1099 | 0. 36649 | 6. 47467041  | 1  |
| MSTRG. 29198. 2  | 725  | 0. 45713 | 6. 026794434 | -1 |
| MSTRG. 29198. 4  | 310  | 0. 38719 | 7. 639099121 | 1  |
| MSTRG. 29207. 2  | 1143 | 0. 4638  | 5. 49786377  | 1  |
| MSTRG. 29207. 3  | 1111 | 0. 47064 | 5. 524230957 | 1  |
| MSTRG. 29208. 1  | 43   | 0. 39942 | 7. 997741699 | -1 |
| MSTRG. 29213. 1  | 0    | 0. 43827 | 0            | -1 |
| MSTRG. 29214. 1  | 155  | 0. 30312 | 11. 7288208  | 1  |
| MSTRG. 29215. 1  | 66   | 0. 35192 | 7. 600524902 | 1  |
| MSTRG. 29219. 1  | 64   | 0. 41897 | 8. 38092041  | 1  |
| MSTRG. 29231. 1  | 65   | 0. 32305 | 9. 350402832 | 1  |
| MSTRG. 29231. 2  | 172  | 0. 30877 | 10. 36273193 | 1  |
| MSTRG. 29229. 16 | 72   | 0. 37362 | 9. 300598145 | 1  |
| MSTRG. 29232. 1  | 57   | 0. 32521 | 9. 257019043 | 1  |
| MSTRG. 29232. 2  | 38   | 0. 29977 | 10. 0223999  | 1  |

|                 |      |          |              |    |
|-----------------|------|----------|--------------|----|
| MSTRG. 29221. 2 | 61   | 0. 35132 | 8. 311340332 | 1  |
| MSTRG. 29224. 2 | 355  | 0. 39238 | 10. 13421631 | 1  |
| MSTRG. 29226. 2 | 142  | 0. 42625 | 8. 067443848 | 1  |
| MSTRG. 29226. 3 | 142  | 0. 42625 | 8. 067443848 | 1  |
| MSTRG. 29233. 3 | 285  | 0. 39011 | 10. 72808838 | 1  |
| MSTRG. 29238. 2 | 205  | 0. 45334 | 9. 07623291  | 1  |
| MSTRG. 29239. 3 | 636  | 0. 43633 | 6. 879577637 | 1  |
| MSTRG. 29240. 1 | 117  | 0. 39082 | 6. 02130127  | 1  |
| MSTRG. 29242. 2 | 684  | 0. 43032 | 4. 441833496 | 1  |
| MSTRG. 29242. 3 | 653  | 0. 4362  | 4. 539489746 | 1  |
| MSTRG. 29242. 5 | 507  | 0. 44504 | 4. 82208252  | 1  |
| MSTRG. 29242. 6 | 462  | 0. 42445 | 4. 806945801 | 1  |
| MSTRG. 29246. 3 | 581  | 0. 36028 | 9. 216125488 | 1  |
| MSTRG. 29257. 4 | 103  | 0. 37693 | 6. 811218262 | 1  |
| MSTRG. 29257. 2 | 148  | 0. 34599 | 11. 70819092 | 1  |
| MSTRG. 29258. 1 | 149  | 0. 36329 | 9. 969299316 | 1  |
| MSTRG. 29258. 2 | 149  | 0. 40975 | 9. 969299316 | 1  |
| MSTRG. 29258. 4 | 149  | 0. 43236 | 9. 969299316 | 1  |
| MSTRG. 29258. 5 | 149  | 0. 42971 | 9. 969299316 | 1  |
| MSTRG. 29258. 6 | 99   | 0. 32154 | 10. 23321533 | -1 |
| MSTRG. 29258. 9 | 149  | 0. 35698 | 9. 969299316 | 1  |
| MSTRG. 29260. 1 | 275  | 0. 39727 | 9. 976013184 | 1  |
| MSTRG. 29262. 2 | 112  | 0. 36555 | 8. 220275879 | 1  |
| MSTRG. 29254. 1 | 432  | 0. 45066 | 6. 42791748  | 1  |
| MSTRG. 29255. 4 | 169  | 0. 39024 | 6. 129333496 | 1  |
| MSTRG. 29268. 1 | 199  | 0. 32206 | 10. 87994385 | 1  |
| MSTRG. 29271. 3 | 301  | 0. 28401 | 10. 68682861 | 1  |
| MSTRG. 29271. 5 | 301  | 0. 38919 | 10. 68682861 | 1  |
| MSTRG. 29276. 1 | 2345 | 0. 41145 | 6. 894104004 | 1  |
| MSTRG. 29276. 3 | 2334 | 0. 41145 | 6. 841369629 | 1  |
| MSTRG. 29278. 1 | 127  | 0. 36829 | 10. 88092041 | 1  |
| MSTRG. 29278. 2 | 127  | 0. 34237 | 10. 88092041 | 1  |
| MSTRG. 29278. 3 | 182  | 0. 41362 | 8. 540588379 | 1  |
| MSTRG. 29279. 2 | 177  | 0. 3924  | 4. 695739746 | 1  |
| MSTRG. 29281. 3 | 545  | 0. 39219 | 8. 180114746 | 1  |
| MSTRG. 29282. 2 | 631  | 0. 42076 | 5. 395812988 | 1  |
| MSTRG. 29283. 2 | 200  | 0. 28331 | 11. 77069092 | 1  |
| MSTRG. 29283. 3 | 200  | 0. 38929 | 11. 64910889 | 1  |
| MSTRG. 29283. 4 | 165  | 0. 2756  | 9. 486877441 | 1  |
| MSTRG. 29283. 5 | 168  | 0. 2756  | 10. 25799561 | 1  |
| MSTRG. 29301. 1 | 40   | 0. 40795 | 4. 192565918 | 1  |
| MSTRG. 29302. 3 | 656  | 0. 45791 | 6. 185119629 | 1  |
| MSTRG. 29302. 1 | 1457 | 0. 4315  | 5. 871520996 | 1  |
| MSTRG. 29305. 2 | 1070 | 0. 39248 | 7. 282897949 | 1  |
| MSTRG. 29305. 3 | 1256 | 0. 37619 | 8. 743591309 | 1  |
| MSTRG. 29307. 3 | 183  | 0. 30307 | 11. 97467041 | 1  |
| MSTRG. 29308. 4 | 1334 | 0. 4379  | 5. 289978027 | 1  |
| MSTRG. 29308. 5 | 1075 | 0. 40754 | 5. 651306152 | 1  |
| MSTRG. 29308. 6 | 819  | 0. 43973 | 6. 271057129 | 1  |
| MSTRG. 29308. 7 | 819  | 0. 44345 | 6. 271057129 | 1  |
| MSTRG. 29293. 2 | 293  | 0. 43717 | 10. 25030518 | 1  |
| MSTRG. 29298. 1 | 388  | 0. 41621 | 9. 522766113 | 1  |
| MSTRG. 29325. 2 | 781  | 0. 41636 | 5. 829162598 | 1  |
| MSTRG. 29328. 7 | 136  | 0. 39646 | 12. 26800537 | 1  |

|                  |      |          |              |   |
|------------------|------|----------|--------------|---|
| MSTRG. 29328. 9  | 305  | 0. 37956 | 11. 84637451 | 1 |
| MSTRG. 29328. 8  | 305  | 0. 34418 | 11. 84637451 | 1 |
| MSTRG. 29333. 2  | 1704 | 0. 46388 | 6. 771179199 | 1 |
| MSTRG. 29334. 1  | 1777 | 0. 46885 | 6. 321838379 | 1 |
| MSTRG. 29334. 5  | 119  | 0. 28153 | 9. 67364502  | 1 |
| MSTRG. 29341. 3  | 173  | 0. 41063 | 5. 87298584  | 1 |
| MSTRG. 29342. 1  | 321  | 0. 28195 | 6. 015930176 | 1 |
| MSTRG. 29342. 2  | 553  | 0. 31061 | 6. 797058105 | 1 |
| MSTRG. 29343. 1  | 141  | 0. 29422 | 8. 174255371 | 1 |
| MSTRG. 29342. 4  | 530  | 0. 27781 | 6. 999206543 | 1 |
| MSTRG. 29356. 21 | 1826 | 0. 41236 | 12. 04705811 | 1 |
| MSTRG. 29356. 18 | 2727 | 0. 4082  | 12. 06695557 | 1 |
| MSTRG. 29356. 9  | 2702 | 0. 40114 | 12. 08026123 | 1 |
| MSTRG. 29356. 12 | 1956 | 0. 41289 | 12. 05340576 | 1 |
| MSTRG. 29356. 13 | 2717 | 0. 40114 | 12. 05975342 | 1 |
| MSTRG. 29356. 14 | 2702 | 0. 40114 | 12. 07855225 | 1 |
| MSTRG. 29356. 16 | 2672 | 0. 39087 | 12. 05377197 | 1 |
| MSTRG. 29356. 5  | 2709 | 0. 40114 | 12. 05084229 | 1 |
| MSTRG. 29356. 6  | 2740 | 0. 41137 | 12. 07696533 | 1 |
| MSTRG. 29356. 8  | 2709 | 0. 41075 | 12. 05084229 | 1 |
| MSTRG. 29356. 15 | 1994 | 0. 4302  | 12. 04925537 | 1 |
| MSTRG. 29356. 19 | 2730 | 0. 40114 | 12. 06842041 | 1 |
| MSTRG. 29356. 22 | 1994 | 0. 41597 | 12. 04925537 | 1 |
| MSTRG. 29356. 23 | 2739 | 0. 40114 | 12. 07525635 | 1 |
| MSTRG. 29356. 24 | 2692 | 0. 41522 | 12. 07159424 | 1 |
| MSTRG. 29347. 1  | 628  | 0. 40564 | 7. 167541504 | 1 |
| MSTRG. 29353. 1  | 46   | 0. 32687 | 6. 006286621 | 1 |
| MSTRG. 29354. 1  | 142  | 0. 44759 | 4. 450256348 | 1 |
| MSTRG. 29359. 2  | 145  | 0. 31993 | 4. 437805176 | 1 |
| MSTRG. 29361. 1  | 50   | 0. 35473 | 4. 93572998  | 1 |
| MSTRG. 29363. 1  | 42   | 0. 33569 | 4. 651184082 | 1 |
| MSTRG. 29364. 1  | 100  | 0. 30552 | 5. 715515137 | 1 |
| MSTRG. 29367. 2  | 332  | 0. 35238 | 9. 33026123  | 1 |
| MSTRG. 29370. 2  | 612  | 0. 34947 | 6. 744689941 | 1 |
| MSTRG. 29375. 2  | 198  | 0. 3013  | 6. 538757324 | 1 |
| MSTRG. 29376. 3  | 73   | 0. 31493 | 11. 47393799 | 1 |
| MSTRG. 29387. 1  | 1754 | 0. 43127 | 5. 763977051 | 1 |
| MSTRG. 29387. 6  | 1754 | 0. 44761 | 5. 763977051 | 1 |
| MSTRG. 29389. 1  | 702  | 0. 4338  | 6. 660583496 | 1 |
| MSTRG. 29388. 6  | 204  | 0. 42086 | 4. 85736084  | 1 |
| MSTRG. 29378. 1  | 85   | 0. 36277 | 6. 882141113 | 1 |
| MSTRG. 29380. 1  | 109  | 0. 2785  | 8. 787902832 | 1 |
| MSTRG. 29379. 3  | 597  | 0. 41828 | 8. 982971191 | 1 |
| MSTRG. 29393. 3  | 188  | 0. 36374 | 10. 25323486 | 1 |
| MSTRG. 29393. 2  | 143  | 0. 31879 | 11. 25140381 | 1 |
| MSTRG. 29393. 4  | 136  | 0. 37889 | 10. 31658936 | 1 |
| MSTRG. 29393. 5  | 150  | 0. 36432 | 10. 41192627 | 1 |
| MSTRG. 29393. 6  | 132  | 0. 40754 | 8. 320129395 | 1 |
| MSTRG. 29393. 7  | 189  | 0. 25528 | 11. 05450439 | 1 |
| MSTRG. 29405. 2  | 1011 | 0. 44376 | 5. 794250488 | 1 |
| MSTRG. 29409. 2  | 153  | 0. 43958 | 6. 297546387 | 1 |
| MSTRG. 29409. 3  | 153  | 0. 42298 | 6. 297546387 | 1 |
| MSTRG. 29411. 1  | 155  | 0. 29362 | 7. 646911621 | 1 |
| MSTRG. 29412. 1  | 1087 | 0. 45748 | 5. 917663574 | 1 |

|                 |      |          |              |   |
|-----------------|------|----------|--------------|---|
| MSTRG. 29417. 3 | 526  | 0. 44643 | 5. 84552002  | 1 |
| MSTRG. 29417. 4 | 526  | 0. 42718 | 5. 84552002  | 1 |
| MSTRG. 29418. 4 | 488  | 0. 40597 | 4. 760559082 | 1 |
| MSTRG. 29420. 2 | 144  | 0. 31389 | 4. 580749512 | 1 |
| MSTRG. 29420. 1 | 144  | 0. 37085 | 4. 580749512 | 1 |
| MSTRG. 29425. 2 | 547  | 0. 37894 | 9. 333068848 | 1 |
| MSTRG. 29425. 5 | 528  | 0. 38256 | 9. 228820801 | 1 |
| MSTRG. 29425. 6 | 457  | 0. 3721  | 8. 577941895 | 1 |
| MSTRG. 29425. 7 | 484  | 0. 37918 | 9. 008972168 | 1 |
| MSTRG. 29426. 3 | 678  | 0. 39756 | 9. 55670166  | 1 |
| MSTRG. 29426. 4 | 1006 | 0. 42035 | 9. 319274902 | 1 |
| MSTRG. 29426. 5 | 558  | 0. 40314 | 9. 350158691 | 1 |
| MSTRG. 29426. 6 | 1007 | 0. 42035 | 9. 319274902 | 1 |
| MSTRG. 29395. 2 | 303  | 0. 43107 | 8. 391906738 | 1 |
| MSTRG. 29404. 5 | 244  | 0. 41099 | 5. 042785645 | 1 |
| MSTRG. 29404. 3 | 177  | 0. 4882  | 5. 328796387 | 1 |
| MSTRG. 29404. 6 | 244  | 0. 4589  | 5. 042785645 | 1 |
| MSTRG. 29404. 7 | 395  | 0. 45542 | 4. 896911621 | 1 |
| MSTRG. 29428. 3 | 500  | 0. 39291 | 7. 931945801 | 1 |
| MSTRG. 29436. 3 | 172  | 0. 33265 | 7. 004577637 | 1 |
| MSTRG. 29432. 3 | 1137 | 0. 49898 | 5. 457946777 | 1 |
| MSTRG. 29445. 1 | 78   | 0. 31165 | 5. 723815918 | 1 |
| MSTRG. 29447. 1 | 180  | 0. 28683 | 10. 98162842 | 1 |
| MSTRG. 29447. 2 | 180  | 0. 33426 | 10. 33795166 | 1 |
| MSTRG. 29449. 1 | 79   | 0. 34928 | 10. 31097412 | 1 |
| MSTRG. 29450. 1 | 55   | 0. 32276 | 10. 10870361 | 1 |
| MSTRG. 29447. 6 | 137  | 0. 29317 | 9. 776672363 | 1 |
| MSTRG. 29447. 7 | 654  | 0. 45587 | 6. 852111816 | 1 |
| MSTRG. 29440. 2 | 217  | 0. 46192 | 9. 218933105 | 1 |
| MSTRG. 29455. 4 | 939  | 0. 41342 | 6. 175476074 | 1 |
| MSTRG. 29455. 6 | 880  | 0. 439   | 5. 930358887 | 1 |
| MSTRG. 29455. 7 | 302  | 0. 34996 | 5. 03729248  | 1 |
| MSTRG. 29454. 1 | 85   | 0. 34243 | 5. 037902832 | 1 |
| MSTRG. 29458. 1 | 150  | 0. 43202 | 11. 82196045 | 1 |
| MSTRG. 29457. 2 | 145  | 0. 42823 | 11. 17584229 | 1 |
| MSTRG. 29463. 1 | 140  | 0. 36194 | 9. 008483887 | 1 |
| MSTRG. 29463. 7 | 161  | 0. 36706 | 5. 992370605 | 1 |
| MSTRG. 29463. 6 | 169  | 0. 37314 | 6. 008850098 | 1 |
| MSTRG. 29466. 1 | 95   | 0. 34722 | 11. 34002686 | 1 |
| MSTRG. 29466. 3 | 95   | 0. 34908 | 11. 34002686 | 1 |
| MSTRG. 29467. 2 | 499  | 0. 45186 | 5. 416320801 | 1 |
| MSTRG. 29467. 3 | 499  | 0. 45969 | 5. 416320801 | 1 |
| MSTRG. 29467. 4 | 86   | 0. 3486  | 8. 625671387 | 1 |
| MSTRG. 29467. 5 | 54   | 0. 34567 | 9. 890930176 | 1 |
| MSTRG. 29481. 2 | 513  | 0. 36035 | 5. 488464355 | 1 |
| MSTRG. 29482. 2 | 111  | 0. 37506 | 9. 620910645 | 1 |
| MSTRG. 29481. 3 | 447  | 0. 43483 | 6. 019836426 | 1 |
| MSTRG. 29470. 1 | 65   | 0. 35006 | 5. 160339355 | 1 |
| MSTRG. 29470. 2 | 43   | 0. 38267 | 9. 819763184 | 1 |
| MSTRG. 29471. 1 | 185  | 0. 29476 | 9. 635314941 | 1 |
| MSTRG. 29484. 1 | 60   | 0. 43219 | 8. 040588379 | 1 |
| MSTRG. 29495. 2 | 687  | 0. 47383 | 7. 82611084  | 1 |
| MSTRG. 29495. 3 | 667  | 0. 43564 | 8. 640441895 | 1 |
| MSTRG. 29497. 1 | 787  | 0. 45759 | 5. 251525879 | 1 |



|                  |      |          |              |    |
|------------------|------|----------|--------------|----|
| MSTRG. 29499. 4  | 205  | 0. 43964 | 5. 44708252  | 1  |
| MSTRG. 29497. 4  | 744  | 0. 43164 | 5. 467712402 | 1  |
| MSTRG. 29497. 3  | 771  | 0. 43164 | 5. 309265137 | 1  |
| MSTRG. 29500. 1  | 87   | 0. 41476 | 7. 683288574 | 1  |
| MSTRG. 29504. 3  | 1732 | 0. 44883 | 8. 254333496 | 1  |
| MSTRG. 29504. 4  | 1732 | 0. 42833 | 8. 254333496 | 1  |
| MSTRG. 29504. 2  | 1732 | 0. 44883 | 8. 254333496 | 1  |
| MSTRG. 29506. 3  | 109  | 0. 27327 | 9. 68572998  | 1  |
| MSTRG. 29502. 2  | 174  | 0. 45365 | 6. 662414551 | 1  |
| MSTRG. 29502. 3  | 82   | 0. 41178 | 5. 633850098 | 1  |
| MSTRG. 29502. 4  | 96   | 0. 32086 | 5. 885437012 | 1  |
| MSTRG. 29509. 1  | 1464 | 0. 43946 | 8. 164001465 | 1  |
| MSTRG. 29509. 2  | 1204 | 0. 43388 | 6. 784851074 | 1  |
| MSTRG. 29509. 3  | 1530 | 0. 46854 | 7. 692321777 | 1  |
| MSTRG. 29511. 2  | 280  | 0. 43571 | 8. 410583496 | 1  |
| MSTRG. 29511. 3  | 280  | 0. 44957 | 8. 410583496 | 1  |
| MSTRG. 29511. 4  | 280  | 0. 43881 | 8. 410583496 | 1  |
| MSTRG. 29511. 5  | 280  | 0. 44142 | 8. 410583496 | 1  |
| MSTRG. 29513. 1  | 64   | 0. 33247 | 8. 797668457 | 1  |
| MSTRG. 29510. 1  | 87   | 0. 3869  | 10. 01287842 | -1 |
| MSTRG. 29512. 1  | 90   | 0. 41877 | 9. 891784668 | -1 |
| MSTRG. 29521. 2  | 296  | 0. 47312 | 9. 679870605 | 1  |
| MSTRG. 29521. 3  | 203  | 0. 28584 | 9. 379455566 | 1  |
| MSTRG. 29521. 4  | 3646 | 0. 47485 | 6. 011291504 | 1  |
| MSTRG. 29524. 1  | 69   | 0. 30808 | 8. 276550293 | 1  |
| MSTRG. 29517. 1  | 532  | 0. 36771 | 9. 509460449 | 1  |
| MSTRG. 29525. 1  | 217  | 0. 43888 | 7. 653869629 | 1  |
| MSTRG. 29525. 3  | 179  | 0. 36778 | 5. 811340332 | 1  |
| MSTRG. 29525. 4  | 201  | 0. 46115 | 6. 175598145 | 1  |
| MSTRG. 29526. 1  | 86   | 0. 39168 | 7. 723205566 | 1  |
| MSTRG. 29532. 5  | 1004 | 0. 45426 | 8. 837219238 | 1  |
| MSTRG. 29533. 5  | 169  | 0. 42604 | 6. 992980957 | -1 |
| MSTRG. 29533. 6  | 169  | 0. 45092 | 6. 992980957 | -1 |
| MSTRG. 29535. 2  | 260  | 0. 43209 | 6. 173278809 | 1  |
| MSTRG. 29535. 3  | 197  | 0. 41018 | 8. 850769043 | 1  |
| MSTRG. 29535. 5  | 192  | 0. 40899 | 5. 023132324 | 1  |
| MSTRG. 29535. 4  | 103  | 0. 40812 | 7. 750427246 | 1  |
| MSTRG. 29536. 1  | 387  | 0. 41307 | 7. 555725098 | 1  |
| MSTRG. 29530. 1  | 577  | 0. 42585 | 7. 862121582 | 1  |
| MSTRG. 29530. 3  | 196  | 0. 34471 | 5. 840393066 | 1  |
| MSTRG. 29531. 3  | 386  | 0. 47452 | 5. 489562988 | 1  |
| MSTRG. 29537. 3  | 246  | 0. 29367 | 7. 665222168 | 1  |
| MSTRG. 29537. 4  | 210  | 0. 42752 | 9. 738464355 | 1  |
| MSTRG. 29557. 1  | 209  | 0. 28982 | 6. 840759277 | 1  |
| MSTRG. 29557. 2  | 209  | 0. 33159 | 6. 840759277 | 1  |
| MSTRG. 29557. 3  | 285  | 0. 35209 | 9. 220275879 | 1  |
| MSTRG. 29557. 4  | 252  | 0. 4037  | 9. 192565918 | 1  |
| MSTRG. 29557. 5  | 209  | 0. 42839 | 6. 840759277 | 1  |
| MSTRG. 29557. 6  | 245  | 0. 4037  | 9. 312194824 | 1  |
| MSTRG. 29557. 7  | 268  | 0. 36032 | 9. 288024902 | 1  |
| MSTRG. 29557. 8  | 248  | 0. 32453 | 9. 244567871 | 1  |
| MSTRG. 29557. 10 | 689  | 0. 41794 | 9. 158874512 | 1  |
| MSTRG. 29558. 5  | 653  | 0. 44441 | 8. 523498535 | 1  |
| MSTRG. 29558. 6  | 96   | 0. 34052 | 8. 771057129 | 1  |

|                  |      |          |              |    |
|------------------|------|----------|--------------|----|
| MSTRG. 29558. 7  | 280  | 0. 43007 | 8. 031311035 | 1  |
| MSTRG. 29559. 3  | 304  | 0. 37405 | 5. 04107666  | 1  |
| MSTRG. 29559. 4  | 304  | 0. 35989 | 5. 04107666  | 1  |
| MSTRG. 29560. 1  | 69   | 0. 35435 | 7. 866760254 | 1  |
| MSTRG. 29561. 1  | 94   | 0. 30595 | 9. 001525879 | 1  |
| MSTRG. 29565. 1  | 4069 | 0. 47608 | 5. 576599121 | 1  |
| MSTRG. 29566. 1  | 89   | 0. 31719 | 9. 02935791  | 1  |
| MSTRG. 29566. 2  | 119  | 0. 35371 | 9. 338806152 | 1  |
| MSTRG. 29567. 1  | 91   | 0. 3825  | 6. 485168457 | 1  |
| MSTRG. 29566. 3  | 117  | 0. 33264 | 10. 33673096 | 1  |
| MSTRG. 29544. 1  | 125  | 0. 33782 | 10. 58660889 | 1  |
| MSTRG. 29543. 2  | 1143 | 0. 48462 | 6. 354309082 | 1  |
| MSTRG. 29545. 1  | 150  | 0. 39099 | 9. 21697998  | 1  |
| MSTRG. 29546. 1  | 109  | 0. 33149 | 9. 555969238 | 1  |
| MSTRG. 29550. 1  | 1667 | 0. 50188 | 8. 663635254 | 1  |
| MSTRG. 29550. 2  | 1667 | 0. 4612  | 8. 663635254 | 1  |
| MSTRG. 29551. 1  | 165  | 0. 35371 | 9. 973937988 | 1  |
| MSTRG. 29552. 2  | 335  | 0. 40813 | 6. 113342285 | 1  |
| MSTRG. 29553. 1  | 263  | 0. 40996 | 9. 337463379 | 1  |
| MSTRG. 29553. 2  | 226  | 0. 43642 | 7. 77520752  | 1  |
| MSTRG. 29553. 3  | 86   | 0. 37648 | 7. 822692871 | 1  |
| MSTRG. 29553. 4  | 86   | 0. 39169 | 7. 822692871 | 1  |
| MSTRG. 29553. 5  | 86   | 0. 37648 | 7. 822692871 | 1  |
| MSTRG. 29553. 6  | 110  | 0. 38113 | 10. 53997803 | 1  |
| MSTRG. 29553. 7  | 226  | 0. 45029 | 7. 77520752  | 1  |
| MSTRG. 29554. 2  | 66   | 0. 3926  | 10. 55975342 | 1  |
| MSTRG. 29556. 1  | 102  | 0. 29507 | 6. 942443848 | 1  |
| MSTRG. 29548. 2  | 752  | 0. 39128 | 6. 128479004 | 1  |
| MSTRG. 29548. 1  | 752  | 0. 47444 | 6. 128479004 | 1  |
| MSTRG. 29547. 1  | 65   | 0. 28572 | 5. 17755127  | 1  |
| MSTRG. 29571. 1  | 25   | 0. 31424 | 12. 30426025 | 1  |
| MSTRG. 29576. 3  | 476  | 0. 45719 | 8. 562316895 | 1  |
| MSTRG. 29576. 4  | 135  | 0. 38494 | 7. 710021973 | 1  |
| MSTRG. 29578. 3  | 262  | 0. 3058  | 8. 89251709  | 1  |
| MSTRG. 29580. 1  | 36   | 0. 49343 | 11. 16595459 | 1  |
| MSTRG. 29583. 2  | 1347 | 0. 3351  | 9. 291442871 | 1  |
| MSTRG. 29583. 4  | 1287 | 0. 39788 | 9. 132019043 | 1  |
| MSTRG. 29584. 1  | 101  | 0. 33622 | 5. 658508301 | 1  |
| MSTRG. 29585. 2  | 614  | 0. 4666  | 5. 290100098 | 1  |
| MSTRG. 29593. 2  | 527  | 0. 33959 | 8. 903137207 | 1  |
| MSTRG. 29594. 3  | 175  | 0. 28559 | 9. 202209473 | 1  |
| MSTRG. 29596. 1  | 44   | 0. 39623 | 5. 968444824 | 1  |
| MSTRG. 29588. 2  | 576  | 0. 45775 | 9. 258117676 | 1  |
| MSTRG. 29598. 1  | 148  | 0. 4096  | 4. 666687012 | 1  |
| MSTRG. 29600. 2  | 673  | 0. 33443 | 6. 59588623  | 1  |
| MSTRG. 29601. 1  | 107  | 0. 29187 | 6. 424377441 | 1  |
| MSTRG. 29599. 1  | 41   | 0. 31305 | 5. 961486816 | -1 |
| MSTRG. 29599. 2  | 33   | 0. 39593 | 9. 842956543 | 1  |
| MSTRG. 29603. 3  | 1712 | 0. 42375 | 9. 66619873  | 1  |
| MSTRG. 29607. 6  | 110  | 0. 37543 | 9. 061828613 | 1  |
| MSTRG. 29607. 11 | 25   | 0. 41606 | 12. 30426025 | 1  |
| MSTRG. 29607. 10 | 1696 | 0. 41977 | 6. 057556152 | 1  |
| MSTRG. 29607. 5  | 1768 | 0. 29387 | 6. 221374512 | 1  |
| MSTRG. 29608. 1  | 60   | 0. 29374 | 10. 18243408 | 1  |

|                  |      |          |              |    |
|------------------|------|----------|--------------|----|
| MSTRG. 29620. 1  | 741  | 0. 32858 | 7. 496765137 | 1  |
| MSTRG. 29624. 1  | 61   | 0. 43141 | 9. 292297363 | 1  |
| MSTRG. 29625. 1  | 83   | 0. 39938 | 9. 36895752  | 1  |
| MSTRG. 29625. 2  | 67   | 0. 30378 | 10. 42938232 | 1  |
| MSTRG. 29627. 1  | 92   | 0. 30804 | 9. 198303223 | 1  |
| MSTRG. 29633. 2  | 184  | 0. 31772 | 6. 27935791  | 1  |
| MSTRG. 29634. 2  | 1801 | 0. 4504  | 6. 742980957 | 1  |
| MSTRG. 29635. 2  | 1657 | 0. 47884 | 5. 16973877  | 1  |
| MSTRG. 29652. 1  | 24   | 0. 3798  | 7. 999206543 | -1 |
| MSTRG. 29654. 1  | 683  | 0. 39168 | 5. 87677002  | 1  |
| MSTRG. 29654. 4  | 670  | 0. 31952 | 5. 838195801 | 1  |
| MSTRG. 29654. 2  | 670  | 0. 32076 | 5. 838195801 | 1  |
| MSTRG. 29654. 5  | 683  | 0. 39945 | 5. 87677002  | 1  |
| MSTRG. 29657. 1  | 1078 | 0. 36761 | 8. 700378418 | 1  |
| MSTRG. 29657. 4  | 1047 | 0. 48087 | 8. 939758301 | 1  |
| MSTRG. 29657. 9  | 959  | 0. 47012 | 8. 593566895 | 1  |
| MSTRG. 29657. 11 | 912  | 0. 46396 | 5. 569519043 | 1  |
| MSTRG. 29644. 1  | 343  | 0. 44828 | 4. 297912598 | 1  |
| MSTRG. 29647. 2  | 178  | 0. 28589 | 11. 20794678 | 1  |
| MSTRG. 29647. 3  | 178  | 0. 31459 | 11. 20794678 | 1  |
| MSTRG. 29663. 2  | 44   | 0. 43186 | 9. 48651123  | 1  |
| MSTRG. 29664. 2  | 261  | 0. 40935 | 9. 795837402 | 1  |
| MSTRG. 29666. 5  | 445  | 0. 46708 | 8. 909729004 | 1  |
| MSTRG. 29667. 1  | 244  | 0. 4315  | 8. 411804199 | 1  |
| MSTRG. 29667. 2  | 244  | 0. 42573 | 8. 411804199 | 1  |
| MSTRG. 29667. 3  | 244  | 0. 41187 | 8. 411804199 | 1  |
| MSTRG. 29667. 4  | 244  | 0. 36391 | 8. 411804199 | 1  |
| MSTRG. 29668. 3  | 271  | 0. 38986 | 9. 026672363 | 1  |
| MSTRG. 29672. 2  | 771  | 0. 39591 | 6. 471862793 | 1  |
| MSTRG. 29673. 1  | 254  | 0. 30717 | 8. 294372559 | 1  |
| MSTRG. 29673. 3  | 239  | 0. 36573 | 8. 294372559 | 1  |
| MSTRG. 29658. 7  | 120  | 0. 42965 | 9. 660827637 | 1  |
| MSTRG. 29658. 5  | 90   | 0. 35263 | 8. 88873291  | 1  |
| MSTRG. 29675. 2  | 399  | 0. 40491 | 4. 567687988 | 1  |
| MSTRG. 29675. 5  | 386  | 0. 4529  | 4. 89276123  | 1  |
| MSTRG. 29676. 2  | 114  | 0. 38283 | 9. 20123291  | 1  |
| MSTRG. 29676. 1  | 99   | 0. 37817 | 9. 26385498  | -1 |
| MSTRG. 29676. 3  | 123  | 0. 36208 | 11. 32977295 | 1  |
| MSTRG. 29676. 4  | 153  | 0. 35928 | 11. 06939697 | 1  |
| MSTRG. 29676. 5  | 153  | 0. 40386 | 11. 06939697 | 1  |
| MSTRG. 29676. 6  | 123  | 0. 37596 | 11. 32977295 | 1  |
| MSTRG. 29677. 3  | 132  | 0. 42122 | 4. 352355957 | 1  |
| MSTRG. 29677. 6  | 132  | 0. 42076 | 4. 352355957 | 1  |
| MSTRG. 29677. 8  | 485  | 0. 47377 | 9. 122009277 | 1  |
| MSTRG. 29677. 5  | 454  | 0. 44912 | 9. 36138916  | 1  |
| MSTRG. 29677. 7  | 464  | 0. 45837 | 9. 315368652 | 1  |
| MSTRG. 29677. 2  | 472  | 0. 43778 | 9. 315490723 | 1  |
| MSTRG. 29678. 3  | 531  | 0. 46214 | 9. 488708496 | 1  |
| MSTRG. 29678. 2  | 531  | 0. 4556  | 9. 488708496 | 1  |
| MSTRG. 29682. 4  | 341  | 0. 41426 | 4. 417541504 | 1  |
| MSTRG. 29687. 2  | 339  | 0. 46244 | 5. 321472168 | 1  |
| MSTRG. 29687. 3  | 339  | 0. 4675  | 5. 321472168 | 1  |
| MSTRG. 29681. 1  | 330  | 0. 42965 | 5. 564025879 | 1  |
| MSTRG. 29692. 2  | 512  | 0. 33597 | 8. 385437012 | 1  |

|                  |      |          |              |    |
|------------------|------|----------|--------------|----|
| MSTRG. 29692. 3  | 215  | 0. 36677 | 10. 0758667  | 1  |
| MSTRG. 29693. 2  | 121  | 0. 37519 | 8. 779968262 | 1  |
| MSTRG. 29695. 2  | 86   | 0. 33099 | 10. 34552002 | 1  |
| MSTRG. 29696. 1  | 528  | 0. 38901 | 10. 51177979 | 1  |
| MSTRG. 29696. 2  | 90   | 0. 30825 | 10. 07855225 | 1  |
| MSTRG. 29696. 3  | 27   | 0. 35203 | 3. 916320801 | -1 |
| MSTRG. 29704. 3  | 3081 | 0. 47441 | 5. 447937012 | 1  |
| MSTRG. 29699. 3  | 52   | 0. 33908 | 11. 69903564 | 1  |
| MSTRG. 29700. 1  | 123  | 0. 37483 | 9. 85333252  | 1  |
| MSTRG. 29700. 2  | 145  | 0. 39724 | 10. 49530029 | 1  |
| MSTRG. 29701. 3  | 21   | 0. 35833 | 9. 992492676 | -1 |
| MSTRG. 29722. 1  | 100  | 0. 33415 | 6. 693908691 | 1  |
| MSTRG. 29722. 2  | 47   | 0. 36805 | 9. 694396973 | 1  |
| MSTRG. 29723. 1  | 136  | 0. 41969 | 8. 868835449 | -1 |
| MSTRG. 29723. 3  | 144  | 0. 33547 | 6. 273132324 | 1  |
| MSTRG. 29724. 1  | 79   | 0. 33491 | 10. 55511475 | 1  |
| MSTRG. 29725. 1  | 64   | 0. 29956 | 8. 528381348 | 1  |
| MSTRG. 29726. 1  | 72   | 0. 44871 | 8. 803039551 | 1  |
| MSTRG. 29724. 4  | 119  | 0. 28989 | 11. 26202393 | 1  |
| MSTRG. 29724. 5  | 147  | 0. 28396 | 7. 054260254 | 1  |
| MSTRG. 29724. 6  | 583  | 0. 39888 | 9. 430725098 | 1  |
| MSTRG. 29727. 1  | 63   | 0. 37002 | 6. 687805176 | 1  |
| MSTRG. 29724. 7  | 674  | 0. 38396 | 9. 41595459  | 1  |
| MSTRG. 29724. 10 | 382  | 0. 35532 | 9. 659118652 | 1  |
| MSTRG. 29724. 11 | 692  | 0. 36546 | 9. 371032715 | 1  |
| MSTRG. 29730. 1  | 213  | 0. 35729 | 6. 581481934 | 1  |
| MSTRG. 29735. 6  | 1682 | 0. 38164 | 6. 550476074 | 1  |
| MSTRG. 29707. 1  | 412  | 0. 44677 | 9. 224304199 | 1  |
| MSTRG. 29710. 1  | 53   | 0. 33736 | 4. 001647949 | 1  |
| MSTRG. 29713. 2  | 131  | 0. 32671 | 11. 42071533 | 1  |
| MSTRG. 29715. 3  | 331  | 0. 45056 | 9. 968566895 | 1  |
| MSTRG. 29738. 1  | 462  | 0. 44642 | 6. 516540527 | 1  |
| MSTRG. 29738. 2  | 462  | 0. 4035  | 6. 516540527 | 1  |
| MSTRG. 29738. 3  | 462  | 0. 45736 | 6. 516540527 | 1  |
| MSTRG. 29739. 1  | 443  | 0. 47233 | 5. 730163574 | 1  |
| MSTRG. 29741. 2  | 448  | 0. 37292 | 6. 952697754 | 1  |
| MSTRG. 29747. 1  | 281  | 0. 45617 | 8. 489685059 | 1  |
| MSTRG. 29748. 1  | 66   | 0. 3676  | 10. 05462646 | 1  |
| MSTRG. 29755. 2  | 575  | 0. 46358 | 5. 85723877  | 1  |
| MSTRG. 29756. 5  | 106  | 0. 36289 | 9. 076599121 | 1  |
| MSTRG. 29757. 1  | 218  | 0. 4687  | 5. 682067871 | -1 |
| MSTRG. 29759. 1  | 213  | 0. 34161 | 6. 66998291  | 1  |
| MSTRG. 29758. 1  | 370  | 0. 39604 | 9. 196228027 | 1  |
| MSTRG. 29763. 1  | 783  | 0. 41864 | 6. 184265137 | 1  |
| MSTRG. 29763. 4  | 282  | 0. 37223 | 7. 135803223 | 1  |
| MSTRG. 29767. 1  | 250  | 0. 38307 | 8. 90826416  | 1  |
| MSTRG. 29767. 2  | 250  | 0. 48087 | 8. 90826416  | 1  |
| MSTRG. 29767. 3  | 250  | 0. 47796 | 8. 90826416  | 1  |
| MSTRG. 29767. 4  | 250  | 0. 46059 | 8. 90826416  | 1  |
| MSTRG. 29767. 5  | 265  | 0. 43833 | 8. 956726074 | 1  |
| MSTRG. 29773. 2  | 175  | 0. 28567 | 8. 917297363 | 1  |
| MSTRG. 29774. 1  | 127  | 0. 35453 | 4. 378723145 | 1  |
| MSTRG. 29774. 4  | 219  | 0. 27651 | 4. 760437012 | 1  |
| MSTRG. 29774. 10 | 186  | 0. 29607 | 4. 799499512 | 1  |

|                  |      |          |              |   |
|------------------|------|----------|--------------|---|
| MSTRG. 29774. 9  | 219  | 0. 27651 | 4. 760437012 | 1 |
| MSTRG. 29774. 7  | 219  | 0. 29961 | 4. 760437012 | 1 |
| MSTRG. 29774. 12 | 186  | 0. 28567 | 4. 799499512 | 1 |
| MSTRG. 29774. 13 | 261  | 0. 27651 | 4. 784118652 | 1 |
| MSTRG. 29774. 15 | 219  | 0. 27651 | 4. 760437012 | 1 |
| MSTRG. 29776. 1  | 129  | 0. 31849 | 10. 03326416 | 1 |
| MSTRG. 29769. 2  | 367  | 0. 42128 | 7. 611999512 | 1 |
| MSTRG. 29849. 2  | 1293 | 0. 44759 | 9. 694763184 | 1 |
| MSTRG. 29849. 4  | 1277 | 0. 44294 | 9. 678161621 | 1 |
| MSTRG. 29849. 3  | 1278 | 0. 41161 | 9. 702819824 | 1 |
| MSTRG. 29851. 1  | 181  | 0. 30981 | 9. 924987793 | 1 |
| MSTRG. 29852. 1  | 170  | 0. 27327 | 9. 556945801 | 1 |
| MSTRG. 29853. 1  | 137  | 0. 27575 | 10. 38739014 | 1 |
| MSTRG. 29854. 1  | 69   | 0. 35907 | 7. 979309082 | 1 |
| MSTRG. 29856. 1  | 113  | 0. 35121 | 9. 406799316 | 1 |
| MSTRG. 29857. 1  | 130  | 0. 28982 | 6. 683898926 | 1 |
| MSTRG. 29858. 1  | 160  | 0. 2921  | 10. 29205322 | 1 |
| MSTRG. 29860. 1  | 49   | 0. 3     | 9. 200134277 | 1 |
| MSTRG. 29861. 1  | 333  | 0. 34162 | 9. 633117676 | 1 |
| MSTRG. 29861. 2  | 333  | 0. 34063 | 9. 633117676 | 1 |
| MSTRG. 29861. 3  | 333  | 0. 36345 | 9. 633117676 | 1 |
| MSTRG. 29849. 5  | 183  | 0. 28883 | 11. 19085693 | 1 |
| MSTRG. 29849. 6  | 108  | 0. 28883 | 9. 812927246 | 1 |
| MSTRG. 29849. 7  | 107  | 0. 28883 | 9. 885925293 | 1 |
| MSTRG. 29849. 8  | 98   | 0. 28883 | 7. 582702637 | 1 |
| MSTRG. 29849. 9  | 98   | 0. 28883 | 7. 582702637 | 1 |
| MSTRG. 29849. 10 | 84   | 0. 29534 | 10. 8793335  | 1 |
| MSTRG. 29791. 15 | 419  | 0. 40755 | 9. 517272949 | 1 |
| MSTRG. 29791. 16 | 531  | 0. 44317 | 9. 118347168 | 1 |
| MSTRG. 29791. 7  | 531  | 0. 43816 | 9. 118347168 | 1 |
| MSTRG. 29791. 8  | 887  | 0. 48083 | 6. 690124512 | 1 |
| MSTRG. 29791. 13 | 999  | 0. 43793 | 6. 08782959  | 1 |
| MSTRG. 29791. 10 | 958  | 0. 38223 | 8. 066711426 | 1 |
| MSTRG. 29791. 11 | 979  | 0. 45009 | 6. 379455566 | 1 |
| MSTRG. 29791. 9  | 979  | 0. 47313 | 6. 379455566 | 1 |
| MSTRG. 29791. 17 | 282  | 0. 34367 | 4. 894714355 | 1 |
| MSTRG. 29791. 18 | 258  | 0. 41501 | 5. 096252441 | 1 |
| MSTRG. 29792. 1  | 64   | 0. 32617 | 11. 53192139 | 1 |
| MSTRG. 29786. 2  | 926  | 0. 44983 | 6. 649719238 | 1 |
| MSTRG. 29787. 1  | 658  | 0. 47632 | 6. 12677002  | 1 |
| MSTRG. 29787. 3  | 623  | 0. 47384 | 6. 219909668 | 1 |
| MSTRG. 29795. 2  | 243  | 0. 42313 | 9. 500427246 | 1 |
| MSTRG. 29796. 1  | 39   | 0. 36849 | 10. 28900146 | 1 |
| MSTRG. 29797. 3  | 245  | 0. 42666 | 5. 335754395 | 1 |
| MSTRG. 29799. 1  | 258  | 0. 3579  | 4. 838439941 | 1 |
| MSTRG. 29799. 2  | 453  | 0. 45615 | 5. 305847168 | 1 |
| MSTRG. 29799. 3  | 162  | 0. 35587 | 11. 39984131 | 1 |
| MSTRG. 29810. 3  | 317  | 0. 35965 | 8. 899230957 | 1 |
| MSTRG. 29810. 4  | 351  | 0. 39091 | 8. 934997559 | 1 |
| MSTRG. 29810. 7  | 317  | 0. 35965 | 8. 899230957 | 1 |
| MSTRG. 29810. 8  | 317  | 0. 37413 | 8. 899230957 | 1 |
| MSTRG. 29810. 6  | 153  | 0. 28195 | 7. 724060059 | 1 |
| MSTRG. 29810. 2  | 351  | 0. 3277  | 8. 934997559 | 1 |
| MSTRG. 29810. 9  | 418  | 0. 33106 | 9. 459533691 | 1 |

|                  |      |          |              |    |
|------------------|------|----------|--------------|----|
| MSTRG. 29800. 5  | 127  | 0. 33006 | 9. 568054199 | 1  |
| MSTRG. 29800. 6  | 90   | 0. 3849  | 6. 799499512 | -1 |
| MSTRG. 29801. 3  | 74   | 0. 34721 | 4. 595031738 | 1  |
| MSTRG. 29802. 1  | 141  | 0. 31021 | 10. 29022217 | 1  |
| MSTRG. 29815. 4  | 1216 | 0. 34996 | 10. 53582764 | 1  |
| MSTRG. 29815. 2  | 977  | 0. 34123 | 10. 019104   | 1  |
| MSTRG. 29815. 5  | 1209 | 0. 37306 | 10. 53582764 | 1  |
| MSTRG. 29815. 6  | 196  | 0. 32429 | 8. 97052002  | 1  |
| MSTRG. 29821. 4  | 223  | 0. 33527 | 9. 55645752  | 1  |
| MSTRG. 29821. 5  | 116  | 0. 41456 | 10. 06280518 | 1  |
| MSTRG. 29825. 2  | 217  | 0. 45783 | 6. 649108887 | 1  |
| MSTRG. 29825. 3  | 177  | 0. 38415 | 7. 718200684 | 1  |
| MSTRG. 29827. 1  | 386  | 0. 28084 | 12. 21710205 | 1  |
| MSTRG. 29830. 1  | 247  | 0. 37428 | 4. 800598145 | 1  |
| MSTRG. 29830. 2  | 247  | 0. 4387  | 4. 800598145 | 1  |
| MSTRG. 29834. 1  | 720  | 0. 43202 | 7. 547302246 | 1  |
| MSTRG. 29835. 2  | 30   | 0. 45403 | 4. 749816895 | 1  |
| MSTRG. 29836. 2  | 307  | 0. 44347 | 6. 374084473 | 1  |
| MSTRG. 29846. 1  | 689  | 0. 47174 | 5. 27911377  | 1  |
| MSTRG. 29846. 8  | 1443 | 0. 37406 | 5. 585754395 | 1  |
| MSTRG. 29846. 7  | 1546 | 0. 37406 | 5. 793395996 | 1  |
| MSTRG. 29846. 9  | 1034 | 0. 35108 | 6. 209655762 | 1  |
| MSTRG. 29846. 10 | 363  | 0. 45807 | 5. 75567627  | -1 |
| MSTRG. 29846. 11 | 1292 | 0. 44945 | 5. 66973877  | -1 |
| MSTRG. 29846. 12 | 201  | 0. 2785  | 8. 783752441 | 1  |
| MSTRG. 29846. 13 | 139  | 0. 27327 | 10. 55511475 | 1  |
| MSTRG. 29846. 14 | 112  | 0. 27327 | 8. 834777832 | 1  |
| MSTRG. 29847. 1  | 125  | 0. 27526 | 5. 581970215 | 1  |
| MSTRG. 29845. 1  | 147  | 0. 45814 | 4. 61907959  | 1  |
| MSTRG. 29868. 1  | 247  | 0. 32565 | 6. 320983887 | 1  |
| MSTRG. 29869. 1  | 155  | 0. 36279 | 5. 328674316 | 1  |
| MSTRG. 29869. 3  | 51   | 0. 29944 | 7. 770568848 | 1  |
| MSTRG. 29869. 5  | 163  | 0. 28247 | 9. 00177002  | 1  |
| MSTRG. 29869. 4  | 97   | 0. 33205 | 8. 302062988 | 1  |
| MSTRG. 29869. 6  | 163  | 0. 28283 | 9. 00177002  | 1  |
| MSTRG. 29869. 7  | 136  | 0. 30961 | 8. 704528809 | 1  |
| MSTRG. 29866. 2  | 41   | 0. 45437 | 4. 812683105 | -1 |
| MSTRG. 29867. 1  | 223  | 0. 44954 | 8. 717712402 | 1  |
| MSTRG. 29867. 2  | 108  | 0. 35497 | 11. 25714111 | 1  |
| MSTRG. 29879. 4  | 527  | 0. 41901 | 7. 082702637 | 1  |
| MSTRG. 29879. 6  | 365  | 0. 37612 | 5. 57611084  | 1  |
| MSTRG. 29879. 7  | 525  | 0. 44014 | 6. 238342285 | 1  |
| MSTRG. 29879. 3  | 613  | 0. 43244 | 5. 776794434 | 1  |
| MSTRG. 29880. 2  | 645  | 0. 44659 | 5. 349182129 | 1  |
| MSTRG. 29880. 3  | 700  | 0. 41801 | 5. 691833496 | 1  |
| MSTRG. 29881. 2  | 352  | 0. 40599 | 6. 100280762 | 1  |
| MSTRG. 29884. 1  | 140  | 0. 41512 | 9. 094177246 | 1  |
| MSTRG. 29884. 2  | 140  | 0. 40892 | 9. 094177246 | 1  |
| MSTRG. 29884. 3  | 167  | 0. 41488 | 9. 855773926 | 1  |
| MSTRG. 29885. 3  | 733  | 0. 40575 | 5. 269470215 | 1  |
| MSTRG. 29890. 4  | 221  | 0. 41774 | 6. 647521973 | 1  |
| MSTRG. 29891. 1  | 100  | 0. 42704 | 9. 765441895 | 1  |
| MSTRG. 29891. 2  | 117  | 0. 41714 | 11. 92645264 | 1  |
| MSTRG. 29891. 3  | 569  | 0. 38433 | 8. 872131348 | 1  |

|                 |      |          |              |   |
|-----------------|------|----------|--------------|---|
| MSTRG. 29891. 4 | 546  | 0. 38371 | 8. 976379395 | 1 |
| MSTRG. 29891. 6 | 569  | 0. 3867  | 9. 236022949 | 1 |
| MSTRG. 29891. 7 | 319  | 0. 38409 | 6. 587219238 | 1 |
| MSTRG. 29894. 2 | 635  | 0. 44653 | 6. 15447998  | 1 |
| MSTRG. 29894. 3 | 227  | 0. 40196 | 11. 86065674 | 1 |
| MSTRG. 29894. 4 | 143  | 0. 44134 | 8. 863464355 | 1 |
| MSTRG. 29896. 7 | 206  | 0. 32466 | 6. 195251465 | 1 |
| MSTRG. 29896. 6 | 142  | 0. 32937 | 9. 992492676 | 1 |
| MSTRG. 29896. 4 | 488  | 0. 3502  | 9. 180969238 | 1 |
| MSTRG. 29896. 5 | 430  | 0. 3638  | 9. 282409668 | 1 |
| MSTRG. 29897. 1 | 62   | 0. 39584 | 8. 711486816 | 1 |
| MSTRG. 29897. 2 | 62   | 0. 33265 | 8. 711486816 | 1 |
| MSTRG. 29897. 3 | 62   | 0. 38627 | 8. 711486816 | 1 |
| MSTRG. 29889. 2 | 204  | 0. 44596 | 10. 8057251  | 1 |
| MSTRG. 29900. 1 | 633  | 0. 45744 | 5. 245422363 | 1 |
| MSTRG. 29903. 3 | 1245 | 0. 46303 | 5. 58001709  | 1 |
| MSTRG. 29903. 1 | 1421 | 0. 43473 | 6. 184265137 | 1 |
| MSTRG. 29904. 1 | 578  | 0. 40236 | 8. 324401855 | 1 |
| MSTRG. 29902. 1 | 99   | 0. 35398 | 5. 58013916  | 1 |
| MSTRG. 29902. 2 | 99   | 0. 4252  | 5. 58013916  | 1 |
| MSTRG. 29902. 3 | 48   | 0. 41251 | 10. 08197021 | 1 |
| MSTRG. 29910. 3 | 213  | 0. 40845 | 4. 841247559 | 1 |
| MSTRG. 29910. 2 | 121  | 0. 35222 | 4. 312194824 | 1 |
| MSTRG. 29912. 2 | 238  | 0. 39141 | 5. 075500488 | 1 |
| MSTRG. 29912. 3 | 227  | 0. 38647 | 9. 020324707 | 1 |
| MSTRG. 29912. 4 | 227  | 0. 37654 | 9. 020324707 | 1 |
| MSTRG. 29912. 5 | 226  | 0. 33049 | 11. 12347412 | 1 |
| MSTRG. 29912. 6 | 286  | 0. 39136 | 5. 06060791  | 1 |
| MSTRG. 29906. 2 | 471  | 0. 35564 | 8. 169616699 | 1 |
| MSTRG. 29906. 4 | 471  | 0. 37797 | 8. 169616699 | 1 |
| MSTRG. 29908. 4 | 490  | 0. 28567 | 6. 79095459  | 1 |
| MSTRG. 29916. 1 | 61   | 0. 28852 | 9. 741271973 | 1 |
| MSTRG. 29917. 1 | 390  | 0. 47409 | 9. 162658691 | 1 |
| MSTRG. 29917. 3 | 390  | 0. 46433 | 9. 162658691 | 1 |
| MSTRG. 29918. 1 | 17   | 0. 40306 | 9. 349304199 | 1 |
| MSTRG. 29920. 1 | 546  | 0. 29054 | 7. 824645996 | 1 |
| MSTRG. 29923. 5 | 226  | 0. 44494 | 6. 084655762 | 1 |
| MSTRG. 29923. 6 | 180  | 0. 37559 | 5. 61505127  | 1 |
| MSTRG. 29921. 1 | 571  | 0. 44921 | 6. 140075684 | 1 |
| MSTRG. 29921. 4 | 402  | 0. 39917 | 8. 887634277 | 1 |
| MSTRG. 29921. 5 | 324  | 0. 37957 | 9. 18939209  | 1 |
| MSTRG. 29926. 3 | 579  | 0. 33379 | 9. 180603027 | 1 |
| MSTRG. 29926. 2 | 579  | 0. 33379 | 9. 180603027 | 1 |
| MSTRG. 29927. 3 | 523  | 0. 34431 | 9. 108947754 | 1 |
| MSTRG. 29934. 4 | 144  | 0. 36255 | 9. 096496582 | 1 |
| MSTRG. 29934. 5 | 144  | 0. 39975 | 9. 096496582 | 1 |
| MSTRG. 29934. 8 | 144  | 0. 37036 | 9. 096496582 | 1 |
| MSTRG. 29941. 3 | 731  | 0. 42856 | 6. 726623535 | 1 |
| MSTRG. 29941. 4 | 728  | 0. 42611 | 6. 726623535 | 1 |
| MSTRG. 29943. 5 | 428  | 0. 4505  | 9. 550476074 | 1 |
| MSTRG. 29943. 3 | 3245 | 0. 43267 | 8. 539001465 | 1 |
| MSTRG. 29943. 2 | 3499 | 0. 4429  | 8. 514953613 | 1 |
| MSTRG. 29943. 4 | 3510 | 0. 4429  | 8. 53302002  | 1 |
| MSTRG. 29938. 1 | 44   | 0. 46372 | 6. 699523926 | 1 |

|                  |      |          |              |    |
|------------------|------|----------|--------------|----|
| MSTRG. 29946. 2  | 150  | 0. 40619 | 10. 51373291 | 1  |
| MSTRG. 29947. 1  | 52   | 0. 40085 | 5. 17388916  | 1  |
| MSTRG. 29949. 1  | 136  | 0. 36439 | 11. 44891357 | 1  |
| MSTRG. 29948. 2  | 124  | 0. 32195 | 10. 78363037 | 1  |
| MSTRG. 29950. 4  | 1087 | 0. 37592 | 4. 413513184 | 1  |
| MSTRG. 29950. 5  | 1455 | 0. 34927 | 4. 493347168 | 1  |
| MSTRG. 29950. 6  | 1263 | 0. 35037 | 4. 460510254 | 1  |
| MSTRG. 29965. 1  | 871  | 0. 43712 | 8. 114685059 | 1  |
| MSTRG. 29965. 5  | 871  | 0. 4691  | 8. 114685059 | 1  |
| MSTRG. 29967. 2  | 242  | 0. 45809 | 5. 947570801 | 1  |
| MSTRG. 29970. 1  | 1325 | 0. 3778  | 8. 729187012 | 1  |
| MSTRG. 29970. 2  | 1325 | 0. 40078 | 8. 729187012 | 1  |
| MSTRG. 29970. 3  | 1325 | 0. 42849 | 8. 729187012 | 1  |
| MSTRG. 29970. 4  | 1318 | 0. 40098 | 8. 695373535 | 1  |
| MSTRG. 29970. 5  | 1318 | 0. 43533 | 8. 695373535 | 1  |
| MSTRG. 29970. 7  | 1318 | 0. 44836 | 8. 695373535 | 1  |
| MSTRG. 29970. 8  | 1325 | 0. 43114 | 8. 729187012 | 1  |
| MSTRG. 29970. 9  | 1030 | 0. 43822 | 9. 084655762 | 1  |
| MSTRG. 29974. 3  | 351  | 0. 40679 | 6. 371398926 | 1  |
| MSTRG. 29974. 2  | 400  | 0. 39001 | 5. 346618652 | 1  |
| MSTRG. 29975. 1  | 84   | 0. 27459 | 8. 166564941 | 1  |
| MSTRG. 29954. 1  | 13   | 0. 38678 | 11. 00030518 | 1  |
| MSTRG. 29955. 1  | 198  | 0. 27957 | 6. 523986816 | 1  |
| MSTRG. 29957. 2  | 669  | 0. 43389 | 6. 025085449 | 1  |
| MSTRG. 29961. 2  | 88   | 0. 30692 | 10. 02972412 | 1  |
| MSTRG. 29980. 5  | 119  | 0. 31578 | 10. 01446533 | 1  |
| MSTRG. 29978. 3  | 331  | 0. 35756 | 6. 751525879 | 1  |
| MSTRG. 29978. 1  | 108  | 0. 3331  | 9. 265930176 | 1  |
| MSTRG. 29978. 2  | 31   | 0. 29892 | 9. 237976074 | 1  |
| MSTRG. 29985. 3  | 869  | 0. 39443 | 4. 947692871 | 1  |
| MSTRG. 29985. 4  | 889  | 0. 36992 | 5. 001647949 | 1  |
| MSTRG. 29990. 1  | 2916 | 0. 44278 | 8. 591369629 | 1  |
| MSTRG. 29990. 2  | 2865 | 0. 44278 | 8. 650695801 | 1  |
| MSTRG. 29990. 5  | 1845 | 0. 43756 | 8. 315612793 | 1  |
| MSTRG. 29990. 6  | 2874 | 0. 44278 | 8. 625305176 | 1  |
| MSTRG. 29990. 7  | 2814 | 0. 45664 | 8. 887023926 | 1  |
| MSTRG. 29990. 8  | 2917 | 0. 43264 | 8. 903747559 | 1  |
| MSTRG. 29990. 9  | 2356 | 0. 4428  | 8. 799743652 | 1  |
| MSTRG. 29990. 10 | 1209 | 0. 44588 | 6. 72076416  | 1  |
| MSTRG. 29991. 1  | 109  | 0. 32814 | 8. 551818848 | 1  |
| MSTRG. 29991. 2  | 86   | 0. 32287 | 12. 69952393 | 1  |
| MSTRG. 29997. 1  | 588  | 0. 36237 | 9. 464294434 | 1  |
| MSTRG. 29997. 2  | 588  | 0. 39275 | 9. 464294434 | 1  |
| MSTRG. 30003. 7  | 456  | 0. 44626 | 7. 13104248  | 1  |
| MSTRG. 30003. 2  | 1077 | 0. 44626 | 6. 052307129 | 1  |
| MSTRG. 30003. 5  | 1678 | 0. 435   | 5. 614196777 | 1  |
| MSTRG. 30003. 4  | 1922 | 0. 44842 | 5. 67755127  | 1  |
| MSTRG. 30003. 3  | 1922 | 0. 435   | 5. 67755127  | 1  |
| MSTRG. 30003. 6  | 1922 | 0. 44058 | 5. 67755127  | 1  |
| MSTRG. 30003. 8  | 1064 | 0. 44935 | 6. 842834473 | 1  |
| MSTRG. 30003. 9  | 87   | 0. 39823 | 11. 42340088 | 1  |
| MSTRG. 29998. 1  | 42   | 0. 31589 | 10. 80657959 | 1  |
| MSTRG. 29999. 1  | 111  | 0. 3239  | 8. 661560059 | 1  |
| MSTRG. 30009. 10 | 591  | 0. 44007 | 9. 621765137 | -1 |



|                  |     |          |              |    |
|------------------|-----|----------|--------------|----|
| MSTRG. 30009. 11 | 586 | 0. 46011 | 8. 257141113 | 1  |
| MSTRG. 30009. 6  | 620 | 0. 45241 | 8. 238830566 | 1  |
| MSTRG. 30009. 7  | 610 | 0. 42336 | 7. 131896973 | 1  |
| MSTRG. 30009. 15 | 676 | 0. 38037 | 8. 403625488 | 1  |
| MSTRG. 30009. 8  | 621 | 0. 38998 | 8. 238830566 | 1  |
| MSTRG. 30009. 17 | 588 | 0. 42024 | 9. 65814209  | -1 |
| MSTRG. 30009. 18 | 652 | 0. 46011 | 9. 663635254 | -1 |
| MSTRG. 30009. 19 | 556 | 0. 37789 | 6. 805969238 | 1  |
| MSTRG. 30009. 20 | 587 | 0. 42024 | 9. 621765137 | -1 |
| MSTRG. 30009. 21 | 664 | 0. 46173 | 8. 385437012 | -1 |
| MSTRG. 30009. 22 | 554 | 0. 45084 | 6. 805969238 | -1 |
| MSTRG. 30009. 23 | 687 | 0. 46011 | 9. 610656738 | -1 |
| MSTRG. 30009. 24 | 268 | 0. 40411 | 5. 941833496 | 1  |
| MSTRG. 30005. 3  | 543 | 0. 36886 | 5. 294616699 | 1  |
| MSTRG. 30010. 3  | 444 | 0. 39518 | 9. 467346191 | 1  |
| MSTRG. 30010. 1  | 734 | 0. 44693 | 9. 352111816 | 1  |
| MSTRG. 30010. 2  | 716 | 0. 44997 | 9. 268493652 | 1  |
| MSTRG. 30011. 2  | 542 | 0. 42704 | 6. 422912598 | 1  |
| MSTRG. 30016. 2  | 436 | 0. 40969 | 8. 750915527 | 1  |
| MSTRG. 30016. 3  | 463 | 0. 40504 | 9. 23260498  | 1  |
| MSTRG. 30016. 5  | 411 | 0. 43958 | 9. 07611084  | 1  |
| MSTRG. 30016. 4  | 411 | 0. 41982 | 9. 07611084  | 1  |
| MSTRG. 30018. 1  | 87  | 0. 30078 | 9. 585021973 | -1 |
| MSTRG. 30020. 2  | 90  | 0. 27403 | 9. 690246582 | 1  |
| MSTRG. 30020. 3  | 90  | 0. 3077  | 9. 690246582 | 1  |
| MSTRG. 30013. 1  | 100 | 0. 30805 | 11. 42144775 | 1  |
| MSTRG. 30014. 1  | 35  | 0. 34527 | 9. 538269043 | 1  |
| MSTRG. 30014. 2  | 46  | 0. 29353 | 12. 30108643 | 1  |
| MSTRG. 30014. 3  | 46  | 0. 2953  | 12. 30108643 | 1  |
| MSTRG. 30014. 4  | 35  | 0. 36639 | 9. 538269043 | 1  |
| MSTRG. 30024. 3  | 144 | 0. 44814 | 8. 825134277 | 1  |
| MSTRG. 30033. 1  | 46  | 0. 30488 | 9. 840026855 | 1  |
| MSTRG. 30035. 2  | 354 | 0. 37852 | 9. 074523926 | 1  |
| MSTRG. 30036. 2  | 331 | 0. 35337 | 8. 871276855 | 1  |
| MSTRG. 30036. 3  | 439 | 0. 40194 | 8. 929626465 | 1  |
| MSTRG. 30036. 4  | 618 | 0. 3638  | 12. 18341064 | 1  |
| MSTRG. 30054. 11 | 729 | 0. 36806 | 6. 186828613 | 1  |
| MSTRG. 30054. 13 | 751 | 0. 34756 | 6. 187683105 | 1  |
| MSTRG. 30054. 2  | 729 | 0. 36994 | 6. 186828613 | 1  |
| MSTRG. 30054. 7  | 679 | 0. 37146 | 6. 484802246 | 1  |
| MSTRG. 30054. 8  | 679 | 0. 39612 | 6. 484802246 | 1  |
| MSTRG. 30054. 17 | 740 | 0. 36994 | 6. 741516113 | 1  |
| MSTRG. 30054. 19 | 382 | 0. 44047 | 6. 352111816 | 1  |
| MSTRG. 30054. 21 | 509 | 0. 44684 | 6. 879333496 | -1 |
| MSTRG. 30054. 20 | 604 | 0. 38404 | 8. 232727051 | -1 |
| MSTRG. 30054. 18 | 559 | 0. 37645 | 6. 370788574 | -1 |
| MSTRG. 30040. 2  | 381 | 0. 42182 | 5. 373352051 | 1  |
| MSTRG. 30040. 3  | 137 | 0. 33039 | 5. 140930176 | 1  |
| MSTRG. 30039. 1  | 196 | 0. 3871  | 8. 534851074 | 1  |
| MSTRG. 30046. 1  | 15  | 0. 32159 | 11. 06878662 | 1  |
| MSTRG. 30046. 2  | 60  | 0. 2968  | 11. 63250732 | 1  |
| MSTRG. 30049. 3  | 359 | 0. 39062 | 5. 242736816 | 1  |
| MSTRG. 30049. 2  | 359 | 0. 40457 | 5. 242736816 | 1  |
| MSTRG. 30055. 1  | 52  | 0. 449   | 10. 75018311 | 1  |

|                 |      |          |              |    |
|-----------------|------|----------|--------------|----|
| MSTRG. 30064. 5 | 111  | 0. 44822 | 9. 011779785 | 1  |
| MSTRG. 30064. 6 | 65   | 0. 43816 | 7. 755310059 | 1  |
| MSTRG. 30068. 1 | 42   | 0. 33027 | 5. 33392334  | 1  |
| MSTRG. 30068. 2 | 32   | 0. 42169 | 5. 971618652 | -1 |
| MSTRG. 30087. 1 | 71   | 0. 46457 | 6. 89263916  | 1  |
| MSTRG. 30091. 1 | 107  | 0. 40574 | 10. 13885498 | -1 |
| MSTRG. 30114. 1 | 612  | 0. 43705 | 6. 785339355 | 1  |
| MSTRG. 30114. 3 | 602  | 0. 42044 | 6. 785339355 | 1  |
| MSTRG. 30102. 1 | 238  | 0. 43856 | 6. 165588379 | 1  |
| MSTRG. 30102. 2 | 629  | 0. 46892 | 5. 707092285 | 1  |
| MSTRG. 30102. 3 | 144  | 0. 38359 | 6. 507019043 | 1  |
| MSTRG. 30126. 5 | 426  | 0. 29022 | 8. 80279541  | 1  |
| MSTRG. 30127. 1 | 114  | 0. 3407  | 9. 504211426 | 1  |
| MSTRG. 30128. 1 | 151  | 0. 3216  | 9. 840881348 | 1  |
| MSTRG. 30129. 1 | 270  | 0. 3     | 8. 106262207 | 1  |
| MSTRG. 30130. 1 | 179  | 0. 29754 | 9. 565612793 | 1  |
| MSTRG. 30132. 1 | 67   | 0. 37535 | 6. 80279541  | 1  |
| MSTRG. 30121. 2 | 344  | 0. 45647 | 6. 281188965 | 1  |
| MSTRG. 30122. 3 | 45   | 0. 38407 | 4. 779968262 | 1  |
| MSTRG. 30124. 1 | 56   | 0. 34419 | 7. 655212402 | 1  |
| MSTRG. 30123. 2 | 206  | 0. 28807 | 4. 804992676 | 1  |
| MSTRG. 30138. 1 | 247  | 0. 45175 | 6. 232727051 | 1  |
| MSTRG. 30143. 1 | 118  | 0. 36681 | 9. 460021973 | 1  |
| MSTRG. 30133. 1 | 28   | 0. 38871 | 8. 495788574 | 1  |
| MSTRG. 30137. 1 | 255  | 0. 4663  | 6. 211120605 | 1  |
| MSTRG. 30165. 3 | 27   | 0. 36499 | 10. 94000244 | 1  |
| MSTRG. 30164. 1 | 77   | 0. 32417 | 6. 477600098 | 1  |
| MSTRG. 30164. 2 | 77   | 0. 3088  | 6. 477600098 | 1  |
| MSTRG. 30175. 1 | 109  | 0. 27398 | 6. 161437988 | 1  |
| MSTRG. 30176. 1 | 75   | 0. 27433 | 6. 22869873  | 1  |
| MSTRG. 30177. 1 | 435  | 0. 41072 | 9. 055969238 | 1  |
| MSTRG. 30177. 4 | 235  | 0. 3795  | 9. 433410645 | 1  |
| MSTRG. 30178. 1 | 162  | 0. 27794 | 8. 363830566 | 1  |
| MSTRG. 30177. 5 | 95   | 0. 31113 | 8. 768249512 | 1  |
| MSTRG. 30177. 6 | 97   | 0. 3285  | 6. 478088379 | 1  |
| MSTRG. 30171. 6 | 256  | 0. 2921  | 6. 327209473 | 1  |
| MSTRG. 30174. 1 | 30   | 0. 38415 | 3. 912780762 | 1  |
| MSTRG. 30182. 1 | 370  | 0. 46104 | 8. 358947754 | 1  |
| MSTRG. 30186. 3 | 236  | 0. 33267 | 8. 645935059 | 1  |
| MSTRG. 30190. 2 | 1940 | 0. 47653 | 6. 324157715 | 1  |
| MSTRG. 30198. 1 | 683  | 0. 33531 | 6. 290100098 | 1  |
| MSTRG. 30198. 3 | 504  | 0. 43402 | 6. 004699707 | 1  |
| MSTRG. 30198. 4 | 683  | 0. 42166 | 6. 290100098 | 1  |
| MSTRG. 30199. 2 | 170  | 0. 30804 | 9. 621643066 | 1  |
| MSTRG. 30199. 3 | 123  | 0. 3     | 7. 504821777 | 1  |
| MSTRG. 30204. 1 | 130  | 0. 28096 | 9. 793029785 | 1  |
| MSTRG. 30204. 2 | 130  | 0. 28096 | 9. 793029785 | 1  |
| MSTRG. 30189. 2 | 165  | 0. 38082 | 6. 166320801 | 1  |
| MSTRG. 30211. 1 | 63   | 0. 32761 | 9. 347106934 | 1  |
| MSTRG. 30212. 3 | 311  | 0. 48189 | 6. 535217285 | 1  |
| MSTRG. 30212. 4 | 708  | 0. 33194 | 5. 527404785 | 1  |
| MSTRG. 30213. 1 | 83   | 0. 33826 | 7. 749816895 | 1  |
| MSTRG. 30214. 1 | 187  | 0. 26101 | 10. 12371826 | 1  |
| MSTRG. 30215. 2 | 1738 | 0. 46382 | 5. 566833496 | 1  |

|                  |      |          |              |    |
|------------------|------|----------|--------------|----|
| MSTRG. 30215. 4  | 300  | 0. 46077 | 8. 678894043 | 1  |
| MSTRG. 30216. 1  | 62   | 0. 46479 | 10. 53375244 | -1 |
| MSTRG. 30217. 2  | 463  | 0. 47809 | 6. 870300293 | 1  |
| MSTRG. 30219. 1  | 693  | 0. 45935 | 5. 528991699 | 1  |
| MSTRG. 30227. 1  | 50   | 0. 43779 | 5. 644226074 | 1  |
| MSTRG. 30227. 2  | 69   | 0. 3458  | 10. 909729   | 1  |
| MSTRG. 30240. 2  | 805  | 0. 40793 | 6. 932189941 | 1  |
| MSTRG. 30241. 1  | 95   | 0. 30656 | 5. 401184082 | 1  |
| MSTRG. 30245. 1  | 80   | 0. 28385 | 10. 60577393 | 1  |
| MSTRG. 30235. 1  | 334  | 0. 48907 | 5. 606262207 | 1  |
| MSTRG. 30239. 1  | 137  | 0. 28099 | 9. 158752441 | 1  |
| MSTRG. 30248. 3  | 421  | 0. 46868 | 6. 513000488 | 1  |
| MSTRG. 30248. 2  | 340  | 0. 42152 | 6. 270935059 | 1  |
| MSTRG. 30248. 4  | 57   | 0. 42619 | 5. 022888184 | -1 |
| MSTRG. 30248. 5  | 53   | 0. 46408 | 4. 351989746 | -1 |
| MSTRG. 30248. 7  | 254  | 0. 40701 | 6. 148620605 | 1  |
| MSTRG. 30248. 9  | 340  | 0. 40054 | 6. 270935059 | 1  |
| MSTRG. 30248. 8  | 340  | 0. 37733 | 6. 270935059 | 1  |
| MSTRG. 30249. 2  | 862  | 0. 37798 | 7. 017028809 | 1  |
| MSTRG. 30258. 2  | 1275 | 0. 46325 | 5. 872131348 | 1  |
| MSTRG. 30258. 3  | 477  | 0. 43883 | 5. 943054199 | 1  |
| MSTRG. 30258. 4  | 779  | 0. 34302 | 5. 261779785 | 1  |
| MSTRG. 30260. 1  | 90   | 0. 40463 | 9. 386291504 | 1  |
| MSTRG. 30258. 5  | 239  | 0. 36837 | 9. 680725098 | 1  |
| MSTRG. 30252. 5  | 1482 | 0. 438   | 9. 336608887 | 1  |
| MSTRG. 30271. 2  | 545  | 0. 33364 | 7. 465393066 | 1  |
| MSTRG. 30271. 3  | 545  | 0. 34692 | 7. 465393066 | 1  |
| MSTRG. 30272. 1  | 74   | 0. 34928 | 5. 398742676 | 1  |
| MSTRG. 30275. 2  | 1552 | 0. 3823  | 6. 250427246 | 1  |
| MSTRG. 30275. 6  | 433  | 0. 3439  | 9. 393249512 | 1  |
| MSTRG. 30275. 7  | 1552 | 0. 35312 | 6. 250427246 | 1  |
| MSTRG. 30275. 8  | 569  | 0. 47198 | 5. 973083496 | -1 |
| MSTRG. 30275. 9  | 93   | 0. 30952 | 8. 073425293 | 1  |
| MSTRG. 30275. 12 | 107  | 0. 33496 | 6. 005187988 | 1  |
| MSTRG. 30278. 1  | 122  | 0. 2921  | 10. 20465088 | 1  |
| MSTRG. 30264. 3  | 483  | 0. 33266 | 9. 451477051 | 1  |
| MSTRG. 30265. 1  | 89   | 0. 44532 | 4. 704284668 | 1  |
| MSTRG. 30281. 1  | 361  | 0. 34261 | 9. 463806152 | 1  |
| MSTRG. 30281. 2  | 377  | 0. 32791 | 9. 56036377  | 1  |
| MSTRG. 30282. 2  | 871  | 0. 49344 | 5. 68548584  | 1  |
| MSTRG. 30282. 3  | 871  | 0. 47101 | 5. 68548584  | 1  |
| MSTRG. 30287. 2  | 227  | 0. 38052 | 7. 690002441 | 1  |
| MSTRG. 30287. 4  | 186  | 0. 40692 | 5. 082214355 | 1  |
| MSTRG. 30288. 2  | 123  | 0. 44973 | 9. 631164551 | 1  |
| MSTRG. 30290. 1  | 236  | 0. 37705 | 6. 704162598 | 1  |
| MSTRG. 30291. 5  | 146  | 0. 3567  | 7. 90447998  | 1  |
| MSTRG. 30291. 4  | 114  | 0. 35507 | 6. 179016113 | 1  |
| MSTRG. 30291. 6  | 114  | 0. 37002 | 6. 179016113 | 1  |
| MSTRG. 30283. 1  | 26   | 0. 3596  | 11. 52288818 | 1  |
| MSTRG. 30302. 5  | 379  | 0. 4382  | 4. 788757324 | -1 |
| MSTRG. 30315. 3  | 193  | 0. 38647 | 9. 230773926 | 1  |
| MSTRG. 30315. 2  | 193  | 0. 33163 | 6. 581604004 | 1  |
| MSTRG. 30315. 4  | 176  | 0. 42703 | 9. 480895996 | 1  |
| MSTRG. 30315. 5  | 176  | 0. 40993 | 9. 480895996 | 1  |

|                  |      |          |              |    |
|------------------|------|----------|--------------|----|
| MSTRG. 30320. 1  | 373  | 0. 34103 | 9. 769958496 | 1  |
| MSTRG. 30321. 3  | 208  | 0. 39939 | 8. 260192871 | 1  |
| MSTRG. 30321. 4  | 246  | 0. 45849 | 5. 855651855 | 1  |
| MSTRG. 30321. 5  | 256  | 0. 44264 | 5. 855407715 | 1  |
| MSTRG. 30321. 6  | 325  | 0. 45955 | 6. 33795166  | 1  |
| MSTRG. 30321. 7  | 198  | 0. 45808 | 8. 33392334  | 1  |
| MSTRG. 30312. 1  | 44   | 0. 45015 | 9. 696350098 | 1  |
| MSTRG. 30313. 1  | 181  | 0. 31345 | 10. 1651001  | 1  |
| MSTRG. 30325. 2  | 737  | 0. 4307  | 7. 292419434 | 1  |
| MSTRG. 30326. 1  | 68   | 0. 3708  | 9. 983337402 | 1  |
| MSTRG. 30326. 2  | 50   | 0. 3972  | 6. 711608887 | 1  |
| MSTRG. 30322. 3  | 59   | 0. 46869 | 6. 181213379 | 1  |
| MSTRG. 30329. 2  | 310  | 0. 35595 | 9. 459411621 | 1  |
| MSTRG. 30331. 2  | 1058 | 0. 45737 | 8. 288024902 | 1  |
| MSTRG. 30332. 2  | 151  | 0. 41445 | 4. 816101074 | 1  |
| MSTRG. 30332. 3  | 166  | 0. 38282 | 5. 071472168 | 1  |
| MSTRG. 30343. 1  | 1103 | 0. 41888 | 8. 88067627  | 1  |
| MSTRG. 30343. 6  | 92   | 0. 28385 | 10. 44683838 | 1  |
| MSTRG. 30343. 4  | 817  | 0. 41755 | 6. 440856934 | 1  |
| MSTRG. 30344. 1  | 844  | 0. 41229 | 8. 104675293 | 1  |
| MSTRG. 30345. 1  | 28   | 0. 35049 | 8. 519348145 | 1  |
| MSTRG. 30348. 1  | 53   | 0. 40179 | 7. 730041504 | 1  |
| MSTRG. 30350. 5  | 99   | 0. 40777 | 7. 921936035 | 1  |
| MSTRG. 30354. 2  | 253  | 0. 38854 | 8. 908508301 | 1  |
| MSTRG. 30357. 2  | 666  | 0. 40108 | 4. 734191895 | 1  |
| MSTRG. 30359. 5  | 113  | 0. 35639 | 5. 883972168 | -1 |
| MSTRG. 30359. 6  | 620  | 0. 49141 | 6. 135192871 | -1 |
| MSTRG. 30361. 7  | 298  | 0. 32269 | 9. 073547363 | 1  |
| MSTRG. 30361. 2  | 298  | 0. 32455 | 9. 073547363 | 1  |
| MSTRG. 30361. 9  | 300  | 0. 39827 | 9. 063293457 | 1  |
| MSTRG. 30361. 11 | 298  | 0. 37046 | 9. 073547363 | 1  |
| MSTRG. 30361. 5  | 300  | 0. 28305 | 9. 063293457 | 1  |
| MSTRG. 30361. 4  | 298  | 0. 32411 | 9. 073547363 | 1  |
| MSTRG. 30361. 14 | 334  | 0. 32848 | 9. 069641113 | 1  |
| MSTRG. 30361. 15 | 334  | 0. 39827 | 9. 069641113 | 1  |
| MSTRG. 30361. 12 | 336  | 0. 41367 | 9. 061462402 | 1  |
| MSTRG. 30361. 6  | 334  | 0. 32759 | 9. 069641113 | 1  |
| MSTRG. 30361. 16 | 300  | 0. 30615 | 9. 063293457 | 1  |
| MSTRG. 30362. 5  | 1619 | 0. 47838 | 5. 922424316 | 1  |
| MSTRG. 30363. 8  | 1643 | 0. 4473  | 5. 554626465 | 1  |
| MSTRG. 30363. 3  | 1890 | 0. 46517 | 5. 59161377  | 1  |
| MSTRG. 30363. 5  | 1857 | 0. 46517 | 5. 551330566 | 1  |
| MSTRG. 30363. 6  | 1858 | 0. 46517 | 5. 551330566 | 1  |
| MSTRG. 30363. 2  | 1895 | 0. 46269 | 5. 573913574 | 1  |
| MSTRG. 30363. 4  | 1861 | 0. 46269 | 5. 533874512 | 1  |
| MSTRG. 30363. 7  | 1862 | 0. 46269 | 5. 533874512 | 1  |
| MSTRG. 30365. 1  | 393  | 0. 42288 | 9. 982116699 | 1  |
| MSTRG. 30367. 1  | 300  | 0. 4464  | 6. 752746582 | 1  |
| MSTRG. 30367. 4  | 97   | 0. 36263 | 10. 5668335  | 1  |
| MSTRG. 30368. 7  | 265  | 0. 44245 | 4. 909484863 | 1  |
| MSTRG. 30368. 4  | 283  | 0. 46767 | 4. 831237793 | 1  |
| MSTRG. 30368. 9  | 283  | 0. 4496  | 4. 831237793 | 1  |
| MSTRG. 30368. 10 | 283  | 0. 48042 | 4. 831237793 | 1  |
| MSTRG. 30375. 1  | 517  | 0. 3945  | 8. 210754395 | 1  |

|                  |      |          |              |   |
|------------------|------|----------|--------------|---|
| MSTRG. 30375. 5  | 431  | 0. 46235 | 8. 312194824 | 1 |
| MSTRG. 30375. 6  | 283  | 0. 41137 | 7. 10760498  | 1 |
| MSTRG. 30375. 9  | 431  | 0. 39616 | 8. 312194824 | 1 |
| MSTRG. 30375. 7  | 517  | 0. 45465 | 8. 210754395 | 1 |
| MSTRG. 30375. 8  | 517  | 0. 43171 | 8. 210754395 | 1 |
| MSTRG. 30375. 12 | 283  | 0. 371   | 7. 10760498  | 1 |
| MSTRG. 30375. 11 | 517  | 0. 37854 | 8. 210754395 | 1 |
| MSTRG. 30375. 14 | 431  | 0. 43463 | 8. 312194824 | 1 |
| MSTRG. 30375. 15 | 431  | 0. 42989 | 8. 312194824 | 1 |
| MSTRG. 30378. 1  | 308  | 0. 37174 | 5. 081726074 | 1 |
| MSTRG. 30371. 1  | 187  | 0. 3577  | 10. 38824463 | 1 |
| MSTRG. 30371. 2  | 85   | 0. 43209 | 9. 199890137 | 1 |
| MSTRG. 30372. 1  | 52   | 0. 33491 | 10. 28448486 | 1 |
| MSTRG. 30382. 2  | 47   | 0. 38792 | 8. 990783691 | 1 |
| MSTRG. 30386. 3  | 249  | 0. 34907 | 6. 196350098 | 1 |
| MSTRG. 30388. 1  | 34   | 0. 36387 | 12. 00286865 | 1 |
| MSTRG. 30386. 5  | 424  | 0. 46974 | 8. 495666504 | 1 |
| MSTRG. 30386. 6  | 386  | 0. 47077 | 9. 467224121 | 1 |
| MSTRG. 30386. 8  | 377  | 0. 45849 | 5. 592224121 | 1 |
| MSTRG. 30393. 2  | 560  | 0. 42722 | 5. 812072754 | 1 |
| MSTRG. 30393. 8  | 369  | 0. 45589 | 5. 938659668 | 1 |
| MSTRG. 30393. 5  | 568  | 0. 46963 | 5. 946105957 | 1 |
| MSTRG. 30393. 9  | 369  | 0. 43074 | 5. 938659668 | 1 |
| MSTRG. 30393. 7  | 560  | 0. 47335 | 5. 812072754 | 1 |
| MSTRG. 30393. 3  | 369  | 0. 41958 | 5. 938659668 | 1 |
| MSTRG. 30394. 1  | 171  | 0. 30268 | 9. 93572998  | 1 |
| MSTRG. 30395. 1  | 113  | 0. 2921  | 10. 23260498 | 1 |
| MSTRG. 30398. 2  | 58   | 0. 39018 | 9. 844299316 | 1 |
| MSTRG. 30398. 3  | 58   | 0. 37309 | 9. 844299316 | 1 |
| MSTRG. 30399. 3  | 1873 | 0. 44112 | 9. 088928223 | 1 |
| MSTRG. 30403. 3  | 968  | 0. 37339 | 9. 022277832 | 1 |
| MSTRG. 30403. 4  | 968  | 0. 37339 | 9. 022277832 | 1 |
| MSTRG. 30403. 5  | 968  | 0. 46079 | 9. 022277832 | 1 |
| MSTRG. 30403. 6  | 874  | 0. 37489 | 9. 137023926 | 1 |
| MSTRG. 30404. 1  | 26   | 0. 31294 | 8. 401550293 | 1 |
| MSTRG. 30416. 1  | 95   | 0. 35889 | 11. 246521   | 1 |
| MSTRG. 30419. 5  | 147  | 0. 37291 | 7. 725036621 | 1 |
| MSTRG. 30409. 1  | 241  | 0. 44073 | 7. 551330566 | 1 |
| MSTRG. 30409. 2  | 213  | 0. 4661  | 6. 340759277 | 1 |
| MSTRG. 30410. 1  | 34   | 0. 35846 | 5. 874450684 | 1 |
| MSTRG. 30411. 3  | 244  | 0. 37887 | 7. 489196777 | 1 |
| MSTRG. 30411. 4  | 244  | 0. 35597 | 7. 489196777 | 1 |
| MSTRG. 30411. 2  | 244  | 0. 34178 | 7. 489196777 | 1 |
| MSTRG. 30411. 6  | 244  | 0. 33958 | 7. 489196777 | 1 |
| MSTRG. 30411. 5  | 244  | 0. 32667 | 7. 489196777 | 1 |
| MSTRG. 30408. 1  | 123  | 0. 32013 | 11. 73895264 | 1 |
| MSTRG. 30436. 1  | 162  | 0. 31769 | 9. 258239746 | 1 |
| MSTRG. 30437. 1  | 88   | 0. 32261 | 6. 511047363 | 1 |
| MSTRG. 30438. 1  | 956  | 0. 4213  | 5. 504455566 | 1 |
| MSTRG. 30439. 1  | 266  | 0. 29088 | 8. 973205566 | 1 |
| MSTRG. 30442. 1  | 831  | 0. 38414 | 5. 10369873  | 1 |
| MSTRG. 30442. 2  | 151  | 0. 4486  | 11. 78155518 | 1 |
| MSTRG. 30442. 3  | 123  | 0. 40725 | 3. 895812988 | 1 |
| MSTRG. 30444. 2  | 265  | 0. 3908  | 9. 159973145 | 1 |

|                  |      |          |              |    |
|------------------|------|----------|--------------|----|
| MSTRG. 30445. 2  | 382  | 0. 44474 | 4. 901428223 | 1  |
| MSTRG. 30448. 1  | 330  | 0. 25706 | 10. 69549561 | 1  |
| MSTRG. 30451. 1  | 20   | 0. 44924 | 7. 953430176 | 1  |
| MSTRG. 30453. 3  | 905  | 0. 43391 | 6. 372375488 | 1  |
| MSTRG. 30453. 4  | 905  | 0. 43654 | 6. 372375488 | 1  |
| MSTRG. 30453. 5  | 878  | 0. 45625 | 6. 146179199 | 1  |
| MSTRG. 30456. 2  | 193  | 0. 37963 | 11. 15997314 | 1  |
| MSTRG. 30456. 1  | 291  | 0. 43262 | 9. 554870605 | 1  |
| MSTRG. 30456. 7  | 229  | 0. 36554 | 9. 343444824 | -1 |
| MSTRG. 30456. 4  | 239  | 0. 33621 | 9. 421569824 | -1 |
| MSTRG. 30438. 2  | 55   | 0. 44221 | 4. 379333496 | 1  |
| MSTRG. 30426. 1  | 31   | 0. 42418 | 6. 504577637 | 1  |
| MSTRG. 30467. 1  | 61   | 0. 43104 | 8. 77154541  | 1  |
| MSTRG. 30469. 1  | 19   | 0. 44025 | 5. 897644043 | 1  |
| MSTRG. 30483. 1  | 128  | 0. 3285  | 9. 183776855 | 1  |
| MSTRG. 30496. 1  | 171  | 0. 35996 | 8. 777526855 | 1  |
| MSTRG. 30496. 2  | 211  | 0. 29526 | 11. 61395264 | 1  |
| MSTRG. 30497. 1  | 68   | 0. 31732 | 5. 287414551 | 1  |
| MSTRG. 30497. 2  | 305  | 0. 34222 | 8. 66998291  | 1  |
| MSTRG. 30496. 3  | 143  | 0. 29607 | 8. 942932129 | 1  |
| MSTRG. 30473. 1  | 104  | 0. 38432 | 11. 27032471 | 1  |
| MSTRG. 30475. 10 | 706  | 0. 32213 | 5. 914367676 | 1  |
| MSTRG. 30475. 11 | 674  | 0. 39555 | 6. 350524902 | 1  |
| MSTRG. 30476. 1  | 47   | 0. 33821 | 10. 637146   | 1  |
| MSTRG. 30479. 1  | 118  | 0. 35829 | 9. 659851074 | 1  |
| MSTRG. 30481. 1  | 238  | 0. 44823 | 6. 777770996 | 1  |
| MSTRG. 30481. 2  | 238  | 0. 37645 | 6. 777770996 | 1  |
| MSTRG. 30481. 3  | 217  | 0. 48638 | 6. 859069824 | 1  |
| MSTRG. 30477. 2  | 164  | 0. 33175 | 5. 927429199 | 1  |
| MSTRG. 30503. 1  | 1081 | 0. 3817  | 5. 592956543 | 1  |
| MSTRG. 30505. 4  | 260  | 0. 40375 | 4. 690856934 | 1  |
| MSTRG. 30506. 1  | 69   | 0. 3207  | 6. 72076416  | 1  |
| MSTRG. 30506. 4  | 69   | 0. 31829 | 6. 72076416  | 1  |
| MSTRG. 30507. 2  | 582  | 0. 3439  | 8. 654846191 | 1  |
| MSTRG. 30518. 1  | 683  | 0. 46201 | 7. 992370605 | 1  |
| MSTRG. 30518. 2  | 683  | 0. 47269 | 7. 992370605 | 1  |
| MSTRG. 30518. 6  | 683  | 0. 49452 | 7. 992370605 | 1  |
| MSTRG. 30517. 2  | 413  | 0. 35052 | 8. 81463623  | 1  |
| MSTRG. 30522. 5  | 126  | 0. 28338 | 6. 160827637 | 1  |
| MSTRG. 30522. 6  | 176  | 0. 31649 | 9. 917297363 | 1  |
| MSTRG. 30523. 1  | 130  | 0. 28002 | 9. 145690918 | 1  |
| MSTRG. 30524. 1  | 65   | 0. 31852 | 6. 700378418 | 1  |
| MSTRG. 30525. 1  | 1705 | 0. 45573 | 9. 29901123  | 1  |
| MSTRG. 30529. 1  | 726  | 0. 40238 | 5. 535339355 | 1  |
| MSTRG. 30530. 1  | 190  | 0. 27517 | 8. 549621582 | 1  |
| MSTRG. 30530. 2  | 96   | 0. 32697 | 5. 479309082 | 1  |
| MSTRG. 30530. 3  | 96   | 0. 36035 | 5. 479309082 | 1  |
| MSTRG. 30531. 3  | 1007 | 0. 34846 | 6. 72064209  | 1  |
| MSTRG. 30536. 1  | 49   | 0. 40163 | 6. 68939209  | 1  |
| MSTRG. 30539. 1  | 65   | 0. 32205 | 5. 637390137 | 1  |
| MSTRG. 30534. 2  | 215  | 0. 38575 | 9. 795959473 | 1  |
| MSTRG. 30534. 3  | 281  | 0. 43109 | 6. 36529541  | 1  |
| MSTRG. 30534. 4  | 78   | 0. 29772 | 5. 60760498  | 1  |
| MSTRG. 30547. 1  | 444  | 0. 47991 | 5. 746643066 | -1 |

|                  |      |          |              |    |
|------------------|------|----------|--------------|----|
| MSTRG. 30547. 2  | 1234 | 0. 34787 | 6. 764953613 | 1  |
| MSTRG. 30547. 6  | 726  | 0. 47579 | 7. 138977051 | -1 |
| MSTRG. 30547. 5  | 734  | 0. 45529 | 6. 519592285 | -1 |
| MSTRG. 30547. 7  | 1207 | 0. 44083 | 6. 507629395 | 1  |
| MSTRG. 30548. 1  | 183  | 0. 34082 | 10. 77410889 | 1  |
| MSTRG. 30548. 2  | 183  | 0. 30159 | 10. 38726807 | 1  |
| MSTRG. 30548. 3  | 183  | 0. 41352 | 11. 00238037 | 1  |
| MSTRG. 30549. 1  | 108  | 0. 31852 | 10. 27972412 | 1  |
| MSTRG. 30550. 1  | 125  | 0. 26113 | 10. 2366333  | 1  |
| MSTRG. 30551. 1  | 75   | 0. 3443  | 9. 899597168 | 1  |
| MSTRG. 30553. 1  | 119  | 0. 31458 | 7. 546447754 | 1  |
| MSTRG. 30554. 1  | 61   | 0. 29884 | 10. 01080322 | 1  |
| MSTRG. 30555. 1  | 117  | 0. 40288 | 6. 883483887 | 1  |
| MSTRG. 30556. 1  | 651  | 0. 47269 | 6. 20098877  | -1 |
| MSTRG. 30556. 2  | 123  | 0. 34407 | 9. 521057129 | 1  |
| MSTRG. 30545. 1  | 54   | 0. 48866 | 10. 54864502 | 1  |
| MSTRG. 30559. 1  | 235  | 0. 29985 | 9. 078674316 | 1  |
| MSTRG. 30559. 3  | 235  | 0. 38203 | 9. 078674316 | 1  |
| MSTRG. 30561. 2  | 552  | 0. 44874 | 5. 057189941 | 1  |
| MSTRG. 30561. 3  | 401  | 0. 30577 | 5. 264709473 | 1  |
| MSTRG. 30562. 2  | 568  | 0. 43447 | 5. 882019043 | 1  |
| MSTRG. 30565. 1  | 405  | 0. 35131 | 5. 60369873  | 1  |
| MSTRG. 30565. 2  | 405  | 0. 3823  | 5. 60369873  | 1  |
| MSTRG. 30565. 4  | 405  | 0. 38046 | 5. 60369873  | 1  |
| MSTRG. 30566. 1  | 85   | 0. 40557 | 5. 205627441 | 1  |
| MSTRG. 30569. 1  | 116  | 0. 28557 | 10. 76849365 | 1  |
| MSTRG. 30571. 1  | 10   | 0. 39793 | 5. 752990723 | 1  |
| MSTRG. 30572. 1  | 47   | 0. 34544 | 9. 381896973 | 1  |
| MSTRG. 30575. 1  | 284  | 0. 34706 | 8. 381652832 | 1  |
| MSTRG. 30575. 2  | 511  | 0. 42195 | 9. 419372559 | 1  |
| MSTRG. 30575. 3  | 83   | 0. 37891 | 10. 30389404 | 1  |
| MSTRG. 30575. 5  | 219  | 0. 37065 | 9. 393249512 | 1  |
| MSTRG. 30576. 1  | 39   | 0. 40514 | 6. 80267334  | 1  |
| MSTRG. 30583. 2  | 366  | 0. 32322 | 5. 165710449 | 1  |
| MSTRG. 30583. 3  | 366  | 0. 32076 | 5. 165710449 | 1  |
| MSTRG. 30583. 4  | 403  | 0. 34126 | 5. 43560791  | 1  |
| MSTRG. 30584. 1  | 276  | 0. 32177 | 9. 751525879 | 1  |
| MSTRG. 30595. 3  | 336  | 0. 28096 | 8. 212219238 | 1  |
| MSTRG. 30595. 5  | 292  | 0. 40896 | 8. 527160645 | -1 |
| MSTRG. 30595. 4  | 292  | 0. 47176 | 8. 527160645 | -1 |
| MSTRG. 30596. 1  | 1037 | 0. 48142 | 6. 205871582 | 1  |
| MSTRG. 30597. 1  | 640  | 0. 46641 | 5. 573059082 | 1  |
| MSTRG. 30597. 3  | 637  | 0. 4569  | 5. 631530762 | 1  |
| MSTRG. 30597. 5  | 635  | 0. 46525 | 5. 573059082 | 1  |
| MSTRG. 30599. 4  | 784  | 0. 31712 | 5. 269226074 | 1  |
| MSTRG. 30614. 8  | 751  | 0. 43298 | 5. 872741699 | 1  |
| MSTRG. 30616. 7  | 325  | 0. 35788 | 8. 993591309 | 1  |
| MSTRG. 30616. 3  | 482  | 0. 34638 | 8. 718688965 | 1  |
| MSTRG. 30616. 6  | 482  | 0. 34638 | 7. 992004395 | 1  |
| MSTRG. 30617. 1  | 79   | 0. 3     | 4. 508850098 | 1  |
| MSTRG. 30616. 8  | 70   | 0. 35659 | 8. 987976074 | 1  |
| MSTRG. 30616. 9  | 179  | 0. 28165 | 9. 215759277 | 1  |
| MSTRG. 30616. 10 | 179  | 0. 28165 | 9. 215759277 | 1  |
| MSTRG. 30618. 1  | 55   | 0. 42092 | 4. 867858887 | 1  |

|                  |      |          |              |    |
|------------------|------|----------|--------------|----|
| MSTRG. 30620. 1  | 382  | 0. 43489 | 5. 188537598 | 1  |
| MSTRG. 30620. 3  | 382  | 0. 46278 | 5. 188537598 | 1  |
| MSTRG. 30623. 4  | 657  | 0. 45566 | 4. 793762207 | 1  |
| MSTRG. 30623. 5  | 520  | 0. 33115 | 4. 586364746 | 1  |
| MSTRG. 30624. 1  | 112  | 0. 41385 | 9. 178894043 | 1  |
| MSTRG. 30625. 1  | 506  | 0. 46634 | 9. 31439209  | 1  |
| MSTRG. 30625. 2  | 507  | 0. 45617 | 9. 31439209  | 1  |
| MSTRG. 30625. 3  | 506  | 0. 47941 | 9. 31439209  | 1  |
| MSTRG. 30625. 4  | 305  | 0. 40202 | 8. 09942627  | 1  |
| MSTRG. 30625. 5  | 507  | 0. 44997 | 9. 31439209  | 1  |
| MSTRG. 30625. 6  | 506  | 0. 45617 | 9. 31439209  | 1  |
| MSTRG. 30628. 1  | 47   | 0. 37276 | 4. 834655762 | 1  |
| MSTRG. 30631. 2  | 78   | 0. 35163 | 6. 695617676 | 1  |
| MSTRG. 30643. 1  | 403  | 0. 35222 | 7. 309509277 | 1  |
| MSTRG. 30645. 3  | 244  | 0. 46623 | 8. 723693848 | -1 |
| MSTRG. 30646. 1  | 373  | 0. 31793 | 8. 532653809 | 1  |
| MSTRG. 30646. 2  | 573  | 0. 29607 | 9. 090637207 | 1  |
| MSTRG. 30637. 1  | 48   | 0. 32558 | 10. 58660889 | 1  |
| MSTRG. 30654. 4  | 223  | 0. 37647 | 5. 116760254 | 1  |
| MSTRG. 30657. 1  | 61   | 0. 42257 | 10. 78057861 | 1  |
| MSTRG. 30658. 2  | 439  | 0. 37162 | 6. 239196777 | 1  |
| MSTRG. 30658. 3  | 439  | 0. 39417 | 6. 239196777 | 1  |
| MSTRG. 30658. 4  | 439  | 0. 42976 | 6. 239196777 | 1  |
| MSTRG. 30669. 1  | 77   | 0. 39108 | 10. 75445557 | 1  |
| MSTRG. 30668. 5  | 287  | 0. 42129 | 8. 655334473 | 1  |
| MSTRG. 30668. 3  | 284  | 0. 32989 | 8. 71270752  | 1  |
| MSTRG. 30668. 4  | 382  | 0. 36496 | 4. 886291504 | 1  |
| MSTRG. 30668. 6  | 708  | 0. 44744 | 5. 481384277 | 1  |
| MSTRG. 30670. 1  | 58   | 0. 34755 | 4. 39630127  | 1  |
| MSTRG. 30671. 10 | 97   | 0. 3014  | 9. 943664551 | 1  |
| MSTRG. 30676. 4  | 317  | 0. 44298 | 8. 616271973 | 1  |
| MSTRG. 30678. 1  | 917  | 0. 32951 | 8. 862731934 | 1  |
| MSTRG. 30685. 1  | 289  | 0. 3329  | 8. 418029785 | 1  |
| MSTRG. 30685. 4  | 103  | 0. 3061  | 10. 77020264 | 1  |
| MSTRG. 30685. 5  | 553  | 0. 39659 | 9. 084533691 | 1  |
| MSTRG. 30685. 6  | 740  | 0. 37404 | 8. 897644043 | 1  |
| MSTRG. 30685. 7  | 599  | 0. 31649 | 8. 524963379 | 1  |
| MSTRG. 30685. 8  | 149  | 0. 30396 | 9. 361022949 | 1  |
| MSTRG. 30685. 9  | 213  | 0. 28923 | 8. 739440918 | 1  |
| MSTRG. 30685. 10 | 213  | 0. 29387 | 8. 739440918 | 1  |
| MSTRG. 30685. 11 | 169  | 0. 44156 | 8. 213439941 | 1  |
| MSTRG. 30685. 12 | 161  | 0. 28167 | 9. 43927002  | 1  |
| MSTRG. 30685. 13 | 128  | 0. 29059 | 10. 43743896 | 1  |
| MSTRG. 30685. 14 | 148  | 0. 2785  | 8. 932312012 | 1  |
| MSTRG. 30685. 15 | 148  | 0. 2846  | 8. 932312012 | 1  |
| MSTRG. 30688. 1  | 67   | 0. 39622 | 8. 50958252  | 1  |
| MSTRG. 30688. 2  | 81   | 0. 33387 | 12. 18206787 | 1  |
| MSTRG. 30693. 1  | 3354 | 0. 45083 | 9. 74005127  | 1  |
| MSTRG. 30693. 6  | 1674 | 0. 46683 | 9. 764465332 | 1  |
| MSTRG. 30693. 2  | 2746 | 0. 45083 | 9. 803405762 | 1  |
| MSTRG. 30693. 3  | 2746 | 0. 45083 | 9. 796691895 | 1  |
| MSTRG. 30693. 4  | 2746 | 0. 45083 | 9. 796691895 | 1  |
| MSTRG. 30693. 7  | 3238 | 0. 45083 | 9. 747619629 | 1  |
| MSTRG. 30693. 9  | 2630 | 0. 42871 | 9. 82220459  | 1  |



|                  |      |          |              |    |
|------------------|------|----------|--------------|----|
| MSTRG. 30695. 1  | 121  | 0. 38881 | 11. 54022217 | 1  |
| MSTRG. 30698. 1  | 20   | 0. 38216 | 10. 28900146 | 1  |
| MSTRG. 30698. 2  | 20   | 0. 37246 | 10. 28900146 | 1  |
| MSTRG. 30699. 1  | 120  | 0. 34553 | 11. 85113525 | 1  |
| MSTRG. 30701. 1  | 80   | 0. 33467 | 9. 662414551 | 1  |
| MSTRG. 30703. 1  | 97   | 0. 33001 | 8. 637878418 | 1  |
| MSTRG. 30703. 2  | 84   | 0. 31709 | 9. 249816895 | 1  |
| MSTRG. 30704. 1  | 194  | 0. 34716 | 9. 001037598 | 1  |
| MSTRG. 30705. 2  | 142  | 0. 31575 | 10. 559021   | 1  |
| MSTRG. 30706. 1  | 116  | 0. 38527 | 9. 784240723 | 1  |
| MSTRG. 30712. 1  | 82   | 0. 33637 | 8. 58770752  | 1  |
| MSTRG. 30712. 2  | 92   | 0. 3388  | 9. 547546387 | 1  |
| MSTRG. 30716. 1  | 616  | 0. 4291  | 9. 304870605 | 1  |
| MSTRG. 30718. 1  | 245  | 0. 31535 | 9. 415344238 | 1  |
| MSTRG. 30718. 2  | 245  | 0. 31532 | 9. 415344238 | 1  |
| MSTRG. 30719. 1  | 73   | 0. 42045 | 10. 52203369 | 1  |
| MSTRG. 30720. 5  | 191  | 0. 3278  | 11. 63580322 | -1 |
| MSTRG. 30720. 4  | 410  | 0. 36289 | 6. 299499512 | 1  |
| MSTRG. 30720. 3  | 410  | 0. 39214 | 6. 299499512 | 1  |
| MSTRG. 30720. 2  | 227  | 0. 40131 | 9. 645080566 | 1  |
| MSTRG. 30736. 1  | 2603 | 0. 42592 | 6. 222595215 | 1  |
| MSTRG. 30736. 3  | 1245 | 0. 46497 | 8. 094421387 | 1  |
| MSTRG. 30736. 4  | 2112 | 0. 42727 | 6. 251159668 | 1  |
| MSTRG. 30737. 1  | 74   | 0. 3947  | 11. 46795654 | -1 |
| MSTRG. 30725. 2  | 166  | 0. 35152 | 7. 056335449 | 1  |
| MSTRG. 30727. 1  | 109  | 0. 38246 | 9. 359436035 | 1  |
| MSTRG. 30728. 1  | 128  | 0. 34857 | 10. 64825439 | 1  |
| MSTRG. 30740. 1  | 154  | 0. 37717 | 9. 066955566 | 1  |
| MSTRG. 30741. 1  | 73   | 0. 31521 | 11. 8583374  | 1  |
| MSTRG. 30743. 6  | 140  | 0. 39401 | 8. 571838379 | 1  |
| MSTRG. 30743. 4  | 66   | 0. 31999 | 6. 231506348 | 1  |
| MSTRG. 30743. 8  | 179  | 0. 44394 | 5. 992370605 | 1  |
| MSTRG. 30743. 9  | 363  | 0. 41399 | 8. 167419434 | 1  |
| MSTRG. 30743. 10 | 505  | 0. 4724  | 10. 00726318 | 1  |
| MSTRG. 30743. 7  | 476  | 0. 45098 | 6. 428527832 | 1  |
| MSTRG. 30747. 5  | 76   | 0. 27763 | 5. 002990723 | 1  |
| MSTRG. 30747. 6  | 106  | 0. 29351 | 5. 891052246 | 1  |
| MSTRG. 30758. 2  | 185  | 0. 45838 | 4. 825744629 | 1  |
| MSTRG. 30759. 1  | 118  | 0. 36283 | 8. 852722168 | 1  |
| MSTRG. 30760. 1  | 94   | 0. 32621 | 9. 251281738 | 1  |
| MSTRG. 30760. 3  | 61   | 0. 35085 | 6. 791564941 | 1  |
| MSTRG. 30760. 4  | 163  | 0. 27575 | 9. 242004395 | 1  |
| MSTRG. 30760. 5  | 517  | 0. 35928 | 9. 038146973 | 1  |
| MSTRG. 30760. 2  | 517  | 0. 29516 | 9. 038146973 | 1  |
| MSTRG. 30762. 1  | 125  | 0. 26749 | 10. 00872803 | 1  |
| MSTRG. 30763. 1  | 144  | 0. 33002 | 10. 10809326 | 1  |
| MSTRG. 30760. 7  | 240  | 0. 27274 | 9. 584777832 | 1  |
| MSTRG. 30760. 8  | 148  | 0. 27516 | 6. 112243652 | 1  |
| MSTRG. 30765. 1  | 203  | 0. 32164 | 9. 162536621 | 1  |
| MSTRG. 30768. 1  | 15   | 0. 41874 | 4. 195983887 | 1  |
| MSTRG. 30771. 1  | 187  | 0. 34196 | 5. 047668457 | 1  |
| MSTRG. 30772. 1  | 166  | 0. 30473 | 10. 05682373 | 1  |
| MSTRG. 30772. 2  | 166  | 0. 32938 | 10. 05682373 | 1  |
| MSTRG. 30753. 7  | 790  | 0. 423   | 6. 513000488 | 1  |

|                 |      |          |              |    |
|-----------------|------|----------|--------------|----|
| MSTRG. 30757. 1 | 91   | 0. 31208 | 9. 496520996 | 1  |
| MSTRG. 30774. 1 | 1248 | 0. 40294 | 5. 065856934 | -1 |
| MSTRG. 30776. 1 | 93   | 0. 36193 | 8. 340270996 | 1  |
| MSTRG. 30787. 1 | 496  | 0. 42057 | 5. 518615723 | 1  |
| MSTRG. 30791. 1 | 30   | 0. 4485  | 9. 122497559 | 1  |
| MSTRG. 30792. 2 | 107  | 0. 35172 | 8. 448181152 | 1  |
| MSTRG. 30793. 1 | 20   | 0. 37946 | 3. 799377441 | 1  |
| MSTRG. 30792. 3 | 86   | 0. 32667 | 10. 22503662 | 1  |
| MSTRG. 30792. 4 | 110  | 0. 36342 | 9. 77532959  | 1  |
| MSTRG. 30792. 5 | 37   | 0. 34855 | 8. 138977051 | 1  |
| MSTRG. 30792. 6 | 38   | 0. 39749 | 8. 906433105 | 1  |
| MSTRG. 30794. 1 | 36   | 0. 42056 | 7. 93939209  | 1  |
| MSTRG. 30795. 4 | 120  | 0. 31673 | 4. 90838623  | 1  |
| MSTRG. 30831. 1 | 101  | 0. 40617 | 9. 23651123  | 1  |
| MSTRG. 30832. 2 | 50   | 0. 37283 | 5. 146911621 | 1  |
| MSTRG. 30798. 1 | 92   | 0. 4663  | 9. 216369629 | 1  |
| MSTRG. 30801. 1 | 69   | 0. 41623 | 9. 300109863 | 1  |
| MSTRG. 30802. 1 | 46   | 0. 39932 | 7. 998596191 | 1  |
| MSTRG. 30803. 2 | 100  | 0. 43746 | 9. 851257324 | 1  |
| MSTRG. 30805. 2 | 308  | 0. 41483 | 8. 508361816 | 1  |
| MSTRG. 30805. 4 | 215  | 0. 46506 | 5. 805114746 | 1  |
| MSTRG. 30806. 1 | 190  | 0. 37434 | 7. 566955566 | 1  |
| MSTRG. 30807. 1 | 80   | 0. 30664 | 4. 59954834  | 1  |
| MSTRG. 30808. 1 | 187  | 0. 28662 | 9. 023498535 | 1  |
| MSTRG. 30808. 2 | 107  | 0. 28307 | 6. 153137207 | 1  |
| MSTRG. 30805. 6 | 87   | 0. 32642 | 6. 553771973 | 1  |
| MSTRG. 30809. 1 | 81   | 0. 42996 | 9. 751525879 | 1  |
| MSTRG. 30812. 1 | 411  | 0. 45878 | 5. 08807373  | 1  |
| MSTRG. 30812. 2 | 1283 | 0. 45325 | 6. 273986816 | 1  |
| MSTRG. 30812. 4 | 772  | 0. 33851 | 5. 660705566 | 1  |
| MSTRG. 30815. 2 | 64   | 0. 39503 | 7. 847473145 | -1 |
| MSTRG. 30817. 1 | 94   | 0. 31204 | 9. 684143066 | 1  |
| MSTRG. 30826. 2 | 257  | 0. 46093 | 8. 447692871 | 1  |
| MSTRG. 30826. 3 | 138  | 0. 42051 | 6. 960876465 | 1  |
| MSTRG. 30826. 5 | 257  | 0. 40194 | 8. 447692871 | 1  |
| MSTRG. 30826. 6 | 182  | 0. 27931 | 10. 71783447 | 1  |
| MSTRG. 30833. 1 | 30   | 0. 36429 | 9. 864929199 | 1  |
| MSTRG. 30866. 1 | 55   | 0. 35915 | 8. 492858887 | 1  |
| MSTRG. 30867. 1 | 89   | 0. 34763 | 9. 29901123  | 1  |
| MSTRG. 30866. 2 | 47   | 0. 36459 | 10. 83428955 | 1  |
| MSTRG. 30868. 1 | 88   | 0. 29367 | 4. 911437988 | 1  |
| MSTRG. 30866. 3 | 204  | 0. 28334 | 9. 649353027 | 1  |
| MSTRG. 30866. 4 | 194  | 0. 31193 | 8. 542175293 | 1  |
| MSTRG. 30866. 5 | 168  | 0. 33674 | 9. 480407715 | 1  |
| MSTRG. 30866. 6 | 168  | 0. 30792 | 9. 480407715 | 1  |
| MSTRG. 30866. 7 | 184  | 0. 26072 | 5. 320617676 | 1  |
| MSTRG. 30866. 8 | 184  | 0. 28048 | 5. 320617676 | 1  |
| MSTRG. 30835. 1 | 108  | 0. 32785 | 10. 37261963 | 1  |
| MSTRG. 30836. 1 | 122  | 0. 34701 | 9. 12689209  | 1  |
| MSTRG. 30836. 4 | 65   | 0. 28027 | 7. 816711426 | 1  |
| MSTRG. 30836. 3 | 68   | 0. 34662 | 8. 537780762 | 1  |
| MSTRG. 30836. 2 | 122  | 0. 31674 | 9. 12689209  | 1  |
| MSTRG. 30836. 5 | 48   | 0. 34761 | 4. 749206543 | 1  |
| MSTRG. 30836. 6 | 63   | 0. 3259  | 3. 93951416  | -1 |

|                  |      |          |              |    |
|------------------|------|----------|--------------|----|
| MSTRG. 30837. 1  | 98   | 0. 31905 | 8. 80670166  | 1  |
| MSTRG. 30889. 5  | 1217 | 0. 35483 | 5. 938659668 | 1  |
| MSTRG. 30889. 7  | 2463 | 0. 408   | 5. 851135254 | 1  |
| MSTRG. 30889. 10 | 77   | 0. 28334 | 9. 178649902 | 1  |
| MSTRG. 30889. 14 | 54   | 0. 28082 | 9. 236877441 | 1  |
| MSTRG. 30892. 1  | 168  | 0. 32762 | 9. 16217041  | 1  |
| MSTRG. 30892. 2  | 168  | 0. 29011 | 9. 16217041  | 1  |
| MSTRG. 30892. 3  | 106  | 0. 38074 | 6. 379455566 | -1 |
| MSTRG. 30892. 4  | 144  | 0. 30375 | 10. 73236084 | 1  |
| MSTRG. 30893. 1  | 77   | 0. 28518 | 10. 60296631 | 1  |
| MSTRG. 30894. 1  | 183  | 0. 29367 | 10. 55560303 | 1  |
| MSTRG. 30889. 16 | 102  | 0. 32862 | 7. 737243652 | 1  |
| MSTRG. 30889. 17 | 165  | 0. 28518 | 7. 551818848 | 1  |
| MSTRG. 30895. 1  | 91   | 0. 35617 | 9. 800842285 | 1  |
| MSTRG. 30889. 19 | 177  | 0. 36218 | 7. 669250488 | 1  |
| MSTRG. 30889. 18 | 219  | 0. 28923 | 8. 48626709  | 1  |
| MSTRG. 30896. 1  | 72   | 0. 33467 | 8. 035827637 | 1  |
| MSTRG. 30889. 20 | 113  | 0. 30664 | 7. 954406738 | 1  |
| MSTRG. 30897. 1  | 88   | 0. 34544 | 9. 00201416  | 1  |
| MSTRG. 30889. 21 | 883  | 0. 44448 | 7. 682922363 | 1  |
| MSTRG. 30871. 1  | 52   | 0. 3436  | 5. 337219238 | 1  |
| MSTRG. 30874. 1  | 115  | 0. 33187 | 9. 770812988 | 1  |
| MSTRG. 30874. 2  | 146  | 0. 29607 | 5. 387756348 | 1  |
| MSTRG. 30876. 3  | 125  | 0. 4045  | 8. 756896973 | 1  |
| MSTRG. 30877. 4  | 771  | 0. 41515 | 6. 254089355 | 1  |
| MSTRG. 30877. 6  | 872  | 0. 47354 | 6. 341491699 | 1  |
| MSTRG. 30878. 2  | 801  | 0. 33443 | 7. 816589355 | 1  |
| MSTRG. 30878. 3  | 863  | 0. 31649 | 8. 642272949 | 1  |
| MSTRG. 30880. 2  | 357  | 0. 28415 | 7. 583557129 | 1  |
| MSTRG. 30883. 2  | 240  | 0. 4733  | 6. 672180176 | 1  |
| MSTRG. 30882. 1  | 50   | 0. 38836 | 5. 733581543 | -1 |
| MSTRG. 30888. 2  | 281  | 0. 46806 | 6. 107116699 | 1  |
| MSTRG. 30899. 2  | 98   | 0. 41188 | 9. 77557373  | 1  |
| MSTRG. 30900. 4  | 185  | 0. 28165 | 10. 83880615 | 1  |
| MSTRG. 30900. 5  | 208  | 0. 28982 | 10. 8012085  | 1  |
| MSTRG. 30900. 6  | 527  | 0. 3208  | 9. 006286621 | 1  |
| MSTRG. 30900. 9  | 185  | 0. 28165 | 10. 83880615 | 1  |
| MSTRG. 30900. 7  | 527  | 0. 35724 | 9. 006286621 | 1  |
| MSTRG. 30900. 8  | 527  | 0. 3351  | 9. 006286621 | 1  |
| MSTRG. 30900. 10 | 562  | 0. 35599 | 9. 065612793 | 1  |
| MSTRG. 30905. 4  | 241  | 0. 29272 | 8. 690002441 | 1  |
| MSTRG. 30906. 1  | 42   | 0. 39006 | 6. 692687988 | -1 |
| MSTRG. 30907. 2  | 361  | 0. 46525 | 6. 084289551 | 1  |
| MSTRG. 30908. 1  | 309  | 0. 3564  | 9. 702697754 | 1  |
| MSTRG. 30909. 1  | 852  | 0. 45639 | 5. 727355957 | 1  |
| MSTRG. 30909. 2  | 760  | 0. 45692 | 5. 957458496 | 1  |
| MSTRG. 30909. 3  | 838  | 0. 45174 | 5. 648254395 | 1  |
| MSTRG. 30909. 4  | 860  | 0. 45639 | 5. 65045166  | 1  |
| MSTRG. 30909. 5  | 846  | 0. 48094 | 5. 648254395 | 1  |
| MSTRG. 30909. 6  | 832  | 0. 48094 | 5. 574523926 | 1  |
| MSTRG. 30910. 2  | 674  | 0. 37566 | 9. 36920166  | 1  |
| MSTRG. 30910. 3  | 664  | 0. 37566 | 9. 474060059 | 1  |
| MSTRG. 30910. 4  | 645  | 0. 37566 | 9. 498352051 | 1  |
| MSTRG. 30910. 5  | 235  | 0. 29727 | 8. 889099121 | 1  |

|                  |      |          |              |    |
|------------------|------|----------|--------------|----|
| MSTRG. 30910. 8  | 335  | 0. 28518 | 9. 33807373  | 1  |
| MSTRG. 30910. 9  | 154  | 0. 32445 | 9. 395080566 | 1  |
| MSTRG. 30911. 3  | 148  | 0. 44293 | 7. 688781738 | -1 |
| MSTRG. 30914. 1  | 36   | 0. 42609 | 4. 800598145 | -1 |
| MSTRG. 30920. 1  | 68   | 0. 35364 | 9. 393493652 | 1  |
| MSTRG. 30937. 1  | 62   | 0. 45812 | 9. 915710449 | 1  |
| MSTRG. 30937. 2  | 39   | 0. 36917 | 6. 374694824 | 1  |
| MSTRG. 30937. 5  | 129  | 0. 33465 | 10. 08978271 | 1  |
| MSTRG. 30937. 6  | 85   | 0. 38439 | 6. 241271973 | 1  |
| MSTRG. 30937. 7  | 209  | 0. 3     | 9. 774108887 | 1  |
| MSTRG. 30937. 8  | 176  | 0. 28662 | 10. 59918213 | 1  |
| MSTRG. 30937. 9  | 56   | 0. 31768 | 9. 570617676 | 1  |
| MSTRG. 30937. 10 | 82   | 0. 31035 | 9. 510314941 | 1  |
| MSTRG. 30939. 1  | 94   | 0. 33964 | 7. 675231934 | 1  |
| MSTRG. 30943. 1  | 454  | 0. 47929 | 5. 642150879 | 1  |
| MSTRG. 30922. 1  | 215  | 0. 39386 | 10. 0758667  | 1  |
| MSTRG. 30922. 2  | 76   | 0. 4318  | 12. 22210693 | 1  |
| MSTRG. 30922. 3  | 160  | 0. 33139 | 9. 603820801 | 1  |
| MSTRG. 30945. 1  | 99   | 0. 33254 | 5. 745788574 | 1  |
| MSTRG. 30948. 11 | 741  | 0. 45266 | 4. 632995605 | 1  |
| MSTRG. 30948. 8  | 1527 | 0. 42877 | 4. 788757324 | 1  |
| MSTRG. 30948. 18 | 1528 | 0. 44263 | 4. 788757324 | 1  |
| MSTRG. 30948. 12 | 2081 | 0. 439   | 4. 95123291  | 1  |
| MSTRG. 30948. 13 | 2158 | 0. 42877 | 5. 022888184 | 1  |
| MSTRG. 30948. 14 | 2144 | 0. 42877 | 5. 013366699 | 1  |
| MSTRG. 30948. 15 | 1426 | 0. 44759 | 5. 605529785 | 1  |
| MSTRG. 30948. 16 | 2023 | 0. 439   | 4. 966491699 | 1  |
| MSTRG. 30948. 9  | 2114 | 0. 42877 | 4. 984191895 | 1  |
| MSTRG. 30948. 7  | 2177 | 0. 439   | 5. 047912598 | 1  |
| MSTRG. 30948. 10 | 2144 | 0. 439   | 5. 013366699 | 1  |
| MSTRG. 30948. 17 | 2075 | 0. 439   | 5. 026550293 | 1  |
| MSTRG. 30948. 6  | 2114 | 0. 439   | 4. 984191895 | 1  |
| MSTRG. 30948. 19 | 187  | 0. 31501 | 9. 622131348 | 1  |
| MSTRG. 30949. 1  | 65   | 0. 2921  | 6. 218200684 | 1  |
| MSTRG. 30950. 2  | 1306 | 0. 44694 | 8. 090026855 | 1  |
| MSTRG. 30951. 1  | 37   | 0. 40023 | 6. 50201416  | -1 |
| MSTRG. 30952. 1  | 17   | 0. 4053  | 12. 00848389 | 1  |
| MSTRG. 30950. 5  | 219  | 0. 41013 | 6. 346496582 | 1  |
| MSTRG. 30950. 7  | 488  | 0. 41515 | 6. 601623535 | 1  |
| MSTRG. 30929. 3  | 659  | 0. 4517  | 6. 34967041  | 1  |
| MSTRG. 30961. 3  | 285  | 0. 32485 | 4. 770324707 | 1  |
| MSTRG. 30961. 4  | 285  | 0. 31035 | 4. 770324707 | 1  |
| MSTRG. 30965. 1  | 520  | 0. 40647 | 6. 379211426 | 1  |
| MSTRG. 30965. 2  | 520  | 0. 42403 | 6. 379211426 | 1  |
| MSTRG. 30965. 3  | 236  | 0. 3208  | 5. 481506348 | 1  |
| MSTRG. 30965. 4  | 402  | 0. 39355 | 5. 755554199 | 1  |
| MSTRG. 30965. 6  | 307  | 0. 32464 | 6. 686950684 | 1  |
| MSTRG. 30965. 5  | 307  | 0. 30419 | 6. 686950684 | 1  |
| MSTRG. 30966. 1  | 39   | 0. 36844 | 5. 967346191 | 1  |
| MSTRG. 30965. 8  | 275  | 0. 4744  | 5. 45135498  | 1  |
| MSTRG. 30965. 9  | 88   | 0. 25198 | 7. 667785645 | 1  |
| MSTRG. 30965. 10 | 133  | 0. 33006 | 8. 632507324 | 1  |
| MSTRG. 30967. 1  | 63   | 0. 30218 | 11. 87518311 | 1  |
| MSTRG. 30967. 3  | 54   | 0. 35269 | 4. 777526855 | -1 |

|                  |      |          |              |    |
|------------------|------|----------|--------------|----|
| MSTRG. 30971. 1  | 42   | 0. 37684 | 10. 0758667  | 1  |
| MSTRG. 30971. 2  | 42   | 0. 36953 | 10. 0758667  | 1  |
| MSTRG. 30968. 1  | 66   | 0. 4307  | 9. 860290527 | 1  |
| MSTRG. 31004. 1  | 263  | 0. 36602 | 9. 143249512 | 1  |
| MSTRG. 31004. 2  | 263  | 0. 36754 | 9. 143249512 | 1  |
| MSTRG. 31004. 4  | 263  | 0. 36826 | 9. 143249512 | 1  |
| MSTRG. 31004. 5  | 293  | 0. 42152 | 9. 096374512 | 1  |
| MSTRG. 31006. 1  | 42   | 0. 30576 | 8. 552062988 | 1  |
| MSTRG. 31007. 1  | 87   | 0. 28842 | 9. 780212402 | 1  |
| MSTRG. 31011. 1  | 47   | 0. 3593  | 5. 509338379 | 1  |
| MSTRG. 31011. 2  | 47   | 0. 35726 | 5. 509338379 | 1  |
| MSTRG. 31011. 3  | 47   | 0. 34885 | 5. 509338379 | 1  |
| MSTRG. 31011. 4  | 47   | 0. 38784 | 5. 509338379 | 1  |
| MSTRG. 31011. 5  | 51   | 0. 38652 | 4. 644348145 | 1  |
| MSTRG. 31015. 3  | 1408 | 0. 33443 | 7. 080749512 | 1  |
| MSTRG. 31015. 4  | 1408 | 0. 28771 | 7. 080749512 | 1  |
| MSTRG. 31015. 5  | 1408 | 0. 33615 | 7. 080749512 | 1  |
| MSTRG. 31015. 6  | 1408 | 0. 29639 | 7. 080749512 | 1  |
| MSTRG. 31021. 2  | 271  | 0. 41909 | 8. 708557129 | 1  |
| MSTRG. 31019. 1  | 35   | 0. 37359 | 9. 520812988 | 1  |
| MSTRG. 31027. 1  | 133  | 0. 282   | 6. 635314941 | 1  |
| MSTRG. 31029. 2  | 116  | 0. 34062 | 6. 140563965 | 1  |
| MSTRG. 31030. 1  | 131  | 0. 28982 | 4. 601867676 | 1  |
| MSTRG. 31035. 1  | 190  | 0. 37112 | 6. 092224121 | 1  |
| MSTRG. 31035. 4  | 138  | 0. 41634 | 5. 604553223 | 1  |
| MSTRG. 31035. 3  | 138  | 0. 38022 | 5. 604553223 | 1  |
| MSTRG. 31035. 5  | 114  | 0. 44388 | 11. 49993896 | 1  |
| MSTRG. 31035. 6  | 206  | 0. 42972 | 7. 598327637 | 1  |
| MSTRG. 31035. 7  | 219  | 0. 45829 | 6. 06060791  | 1  |
| MSTRG. 31035. 8  | 219  | 0. 43863 | 6. 946716309 | 1  |
| MSTRG. 31031. 1  | 54   | 0. 37634 | 8. 492980957 | 1  |
| MSTRG. 31036. 2  | 213  | 0. 30188 | 9. 465515137 | 1  |
| MSTRG. 31043. 1  | 309  | 0. 40932 | 5. 201477051 | 1  |
| MSTRG. 31044. 1  | 91   | 0. 31209 | 9. 946350098 | 1  |
| MSTRG. 31045. 13 | 194  | 0. 33351 | 9. 537414551 | 1  |
| MSTRG. 31045. 4  | 2805 | 0. 46524 | 6. 024963379 | -1 |
| MSTRG. 31045. 7  | 2805 | 0. 46557 | 6. 024963379 | -1 |
| MSTRG. 31045. 11 | 2805 | 0. 4865  | 6. 024963379 | -1 |
| MSTRG. 31045. 15 | 2805 | 0. 46557 | 6. 024963379 | -1 |
| MSTRG. 31045. 16 | 298  | 0. 43091 | 9. 498962402 | 1  |
| MSTRG. 31045. 8  | 2805 | 0. 4865  | 6. 024963379 | -1 |
| MSTRG. 31045. 14 | 298  | 0. 41657 | 9. 498962402 | 1  |
| MSTRG. 31045. 12 | 2805 | 0. 4865  | 6. 024963379 | -1 |
| MSTRG. 31045. 9  | 2805 | 0. 48925 | 6. 024963379 | -1 |
| MSTRG. 31045. 10 | 298  | 0. 39379 | 9. 498962402 | 1  |
| MSTRG. 31045. 6  | 2805 | 0. 48925 | 6. 024963379 | -1 |
| MSTRG. 31046. 1  | 92   | 0. 3136  | 10. 16326904 | 1  |
| MSTRG. 31047. 1  | 175  | 0. 27842 | 9. 619934082 | 1  |
| MSTRG. 31051. 1  | 104  | 0. 29771 | 9. 301330566 | 1  |
| MSTRG. 31052. 1  | 110  | 0. 29543 | 9. 442199707 | 1  |
| MSTRG. 31053. 5  | 1253 | 0. 49724 | 5. 246765137 | -1 |
| MSTRG. 31058. 1  | 268  | 0. 32762 | 5. 605163574 | 1  |
| MSTRG. 31071. 1  | 60   | 0. 3636  | 8. 432434082 | 1  |
| MSTRG. 31071. 2  | 51   | 0. 30378 | 9. 619445801 | 1  |

|                |      |         |             |    |
|----------------|------|---------|-------------|----|
| MSTRG. 31083.2 | 639  | 0.41558 | 6.698547363 | 1  |
| MSTRG. 31105.3 | 494  | 0.383   | 9.165588379 | 1  |
| MSTRG. 31105.4 | 494  | 0.40416 | 9.165588379 | 1  |
| MSTRG. 31111.2 | 61   | 0.45706 | 9.511657715 | -1 |
| MSTRG. 31112.1 | 260  | 0.37444 | 4.676208496 | 1  |
| MSTRG. 31116.2 | 133  | 0.35632 | 9.20880127  | 1  |
| MSTRG. 31116.3 | 1387 | 0.35893 | 8.511169434 | 1  |
| MSTRG. 31116.4 | 797  | 0.28119 | 8.103088379 | 1  |
| MSTRG. 31116.5 | 1447 | 0.39801 | 8.56829834  | 1  |
| MSTRG. 31117.1 | 60   | 0.3223  | 10.84747314 | 1  |
| MSTRG. 31117.2 | 60   | 0.4534  | 10.84747314 | 1  |
| MSTRG. 31116.6 | 652  | 0.43854 | 9.123718262 | 1  |
| MSTRG. 31119.2 | 443  | 0.4278  | 9.603942871 | 1  |
| MSTRG. 31120.8 | 731  | 0.46891 | 6.217346191 | 1  |
| MSTRG. 31121.1 | 44   | 0.32181 | 8.942077637 | 1  |
| MSTRG. 31122.4 | 110  | 0.29206 | 10.69989014 | 1  |
| MSTRG. 31122.3 | 530  | 0.3999  | 5.322937012 | 1  |
| MSTRG. 31114.4 | 164  | 0.29547 | 6.430236816 | 1  |
| MSTRG. 31125.1 | 153  | 0.32237 | 5.252868652 | 1  |
| MSTRG. 31125.2 | 87   | 0.33105 | 6.797058105 | 1  |
| MSTRG. 31128.3 | 191  | 0.3582  | 4.99041748  | 1  |
| MSTRG. 31132.3 | 387  | 0.46864 | 6.457092285 | 1  |
| MSTRG. 31134.3 | 240  | 0.37801 | 9.435852051 | 1  |
| MSTRG. 31134.4 | 51   | 0.42378 | 9.570861816 | 1  |
| MSTRG. 31134.5 | 169  | 0.33231 | 9.255187988 | 1  |
| MSTRG. 31134.6 | 77   | 0.32346 | 9.056091309 | 1  |
| MSTRG. 31133.1 | 44   | 0.36402 | 5.194152832 | -1 |
| MSTRG. 31142.2 | 189  | 0.38308 | 5.413391113 | 1  |
| MSTRG. 31143.2 | 396  | 0.41234 | 9.148010254 | 1  |
| MSTRG. 31143.3 | 261  | 0.36506 | 9.460510254 | 1  |
| MSTRG. 31146.1 | 1867 | 0.46946 | 5.873718262 | 1  |
| MSTRG. 31146.2 | 112  | 0.36033 | 10.61383057 | 1  |
| MSTRG. 31146.4 | 161  | 0.37576 | 10.51434326 | 1  |
| MSTRG. 31146.3 | 110  | 0.31633 | 10.62713623 | 1  |
| MSTRG. 31146.5 | 68   | 0.31644 | 10.28094482 | 1  |
| MSTRG. 31148.2 | 2011 | 0.41724 | 5.362854004 | 1  |
| MSTRG. 31149.2 | 76   | 0.31976 | 6.879333496 | 1  |
| MSTRG. 31144.1 | 418  | 0.42208 | 7.150085449 | 1  |
| MSTRG. 31144.2 | 303  | 0.38506 | 9.375793457 | 1  |
| MSTRG. 31144.5 | 41   | 0.27943 | 9.496887207 | 1  |
| MSTRG. 31144.6 | 79   | 0.30904 | 6.821838379 | 1  |
| MSTRG. 31145.2 | 567  | 0.40215 | 8.494689941 | 1  |
| MSTRG. 31157.1 | 31   | 0.37843 | 12.03204346 | 1  |
| MSTRG. 31157.2 | 31   | 0.42088 | 12.03204346 | 1  |
| MSTRG. 31158.2 | 181  | 0.37196 | 6.445251465 | 1  |
| MSTRG. 31158.3 | 181  | 0.45397 | 6.445251465 | 1  |
| MSTRG. 31158.4 | 181  | 0.40531 | 6.445251465 | 1  |
| MSTRG. 31159.1 | 92   | 0.33828 | 6.690979004 | 1  |
| MSTRG. 31160.2 | 283  | 0.37371 | 8.949279785 | 1  |
| MSTRG. 31160.3 | 283  | 0.3612  | 8.949279785 | 1  |
| MSTRG. 31160.4 | 293  | 0.40931 | 9.027282715 | 1  |
| MSTRG. 31161.1 | 43   | 0.35665 | 8.967102051 | 1  |
| MSTRG. 31165.1 | 107  | 0.37029 | 5.79107666  | 1  |
| MSTRG. 31165.3 | 73   | 0.35355 | 8.639587402 | 1  |

|                |      |         |             |    |
|----------------|------|---------|-------------|----|
| MSTRG. 31155.1 | 69   | 0.41822 | 6.235412598 | 1  |
| MSTRG. 31155.2 | 50   | 0.3533  | 7.837341309 | -1 |
| MSTRG. 31156.1 | 415  | 0.39814 | 6.022399902 | 1  |
| MSTRG. 31167.1 | 213  | 0.38063 | 8.778625488 | 1  |
| MSTRG. 31167.2 | 191  | 0.45012 | 9.086975098 | 1  |
| MSTRG. 31169.5 | 678  | 0.47461 | 5.248718262 | 1  |
| MSTRG. 31169.6 | 603  | 0.47542 | 5.25567627  | 1  |
| MSTRG. 31169.7 | 680  | 0.34998 | 5.248718262 | 1  |
| MSTRG. 31171.1 | 626  | 0.45428 | 8.867004395 | 1  |
| MSTRG. 31172.3 | 632  | 0.47397 | 8.256164551 | 1  |
| MSTRG. 31175.2 | 957  | 0.35673 | 6.261413574 | 1  |
| MSTRG. 31175.3 | 512  | 0.36837 | 9.019592285 | 1  |
| MSTRG. 31174.1 | 190  | 0.36723 | 9.981994629 | 1  |
| MSTRG. 31187.3 | 577  | 0.3892  | 6.260314941 | 1  |
| MSTRG. 31188.4 | 1593 | 0.4747  | 8.30291748  | 1  |
| MSTRG. 31189.2 | 246  | 0.39204 | 10.04876709 | 1  |
| MSTRG. 31189.3 | 511  | 0.42714 | 8.761047363 | 1  |
| MSTRG. 31189.4 | 409  | 0.47334 | 8.987976074 | 1  |
| MSTRG. 31193.1 | 39   | 0.43922 | 9.18560791  | 1  |
| MSTRG. 31194.1 | 86   | 0.31793 | 9.946594238 | 1  |
| MSTRG. 31196.2 | 94   | 0.34773 | 8.802429199 | 1  |
| MSTRG. 31196.1 | 111  | 0.27794 | 6.994689941 | 1  |
| MSTRG. 31197.1 | 89   | 0.31501 | 5.082214355 | 1  |
| MSTRG. 31201.1 | 64   | 0.36837 | 6.700866699 | 1  |
| MSTRG. 31202.1 | 25   | 0.37685 | 5.06060791  | 1  |
| MSTRG. 31205.1 | 122  | 0.2562  | 9.390808105 | 1  |
| MSTRG. 31210.1 | 79   | 0.3434  | 6.883972168 | 1  |
| MSTRG. 31211.1 | 288  | 0.34989 | 5.965637207 | 1  |
| MSTRG. 31215.1 | 578  | 0.32708 | 8.335021973 | 1  |
| MSTRG. 31215.2 | 503  | 0.33998 | 8.824157715 | 1  |
| MSTRG. 31218.2 | 204  | 0.36159 | 11.61578369 | 1  |
| MSTRG. 31219.2 | 137  | 0.36416 | 10.33599854 | 1  |
| MSTRG. 31222.3 | 25   | 0.33397 | 4.677062988 | 1  |
| MSTRG. 31223.1 | 97   | 0.34908 | 6.710510254 | 1  |
| MSTRG. 31231.2 | 83   | 0.33531 | 9.992126465 | 1  |
| MSTRG. 31231.3 | 92   | 0.44826 | 6.278015137 | 1  |
| MSTRG. 31231.4 | 137  | 0.38446 | 8.718322754 | 1  |
| MSTRG. 31231.5 | 20   | 0.36609 | 10.83428955 | 1  |
| MSTRG. 31231.6 | 91   | 0.28648 | 9.445251465 | 1  |
| MSTRG. 31233.1 | 133  | 0.28267 | 6.92376709  | 1  |
| MSTRG. 31235.1 | 284  | 0.29783 | 11.11029053 | 1  |
| MSTRG. 31236.1 | 85   | 0.28186 | 10.01409912 | 1  |
| MSTRG. 31237.1 | 157  | 0.29088 | 5.653015137 | 1  |
| MSTRG. 31238.1 | 135  | 0.28923 | 7.596862793 | 1  |
| MSTRG. 31231.7 | 168  | 0.28063 | 9.460754395 | 1  |
| MSTRG. 31239.1 | 116  | 0.28883 | 7.559509277 | 1  |
| MSTRG. 31240.1 | 192  | 0.29187 | 6.078308105 | 1  |
| MSTRG. 31241.1 | 219  | 0.43568 | 8.797790527 | 1  |
| MSTRG. 31242.1 | 169  | 0.28109 | 11.63995361 | 1  |
| MSTRG. 31240.2 | 145  | 0.28338 | 11.02813721 | 1  |
| MSTRG. 31244.1 | 130  | 0.28199 | 12.15594482 | 1  |
| MSTRG. 31244.2 | 130  | 0.28503 | 12.15594482 | 1  |
| MSTRG. 31245.2 | 78   | 0.24306 | 7.807922363 | 1  |
| MSTRG. 31230.1 | 63   | 0.38224 | 10.58843994 | -1 |

|                  |      |          |              |    |
|------------------|------|----------|--------------|----|
| MSTRG. 31246. 1  | 79   | 0. 41362 | 5. 918029785 | -1 |
| MSTRG. 31246. 2  | 71   | 0. 4112  | 10. 0112915  | 1  |
| MSTRG. 31247. 2  | 74   | 0. 32489 | 11. 83990479 | 1  |
| MSTRG. 31251. 1  | 334  | 0. 38147 | 10. 10162354 | 1  |
| MSTRG. 31251. 3  | 97   | 0. 38026 | 10. 21710205 | 1  |
| MSTRG. 31251. 2  | 270  | 0. 46747 | 9. 97845459  | 1  |
| MSTRG. 31251. 4  | 344  | 0. 41692 | 10. 01983643 | 1  |
| MSTRG. 31251. 5  | 107  | 0. 41754 | 9. 966369629 | 1  |
| MSTRG. 31271. 1  | 114  | 0. 39129 | 5. 06451416  | 1  |
| MSTRG. 31271. 2  | 105  | 0. 34504 | 9. 350158691 | 1  |
| MSTRG. 31263. 1  | 146  | 0. 34456 | 7. 790344238 | 1  |
| MSTRG. 31273. 1  | 96   | 0. 31546 | 9. 940124512 | 1  |
| MSTRG. 31278. 3  | 151  | 0. 38136 | 9. 223327637 | 1  |
| MSTRG. 31278. 4  | 211  | 0. 39526 | 6. 745788574 | 1  |
| MSTRG. 31278. 5  | 219  | 0. 28496 | 6. 182800293 | 1  |
| MSTRG. 31279. 1  | 61   | 0. 37468 | 9. 469055176 | 1  |
| MSTRG. 31286. 4  | 52   | 0. 41855 | 7. 880554199 | 1  |
| MSTRG. 31287. 3  | 1521 | 0. 4087  | 6. 392150879 | 1  |
| MSTRG. 31285. 1  | 202  | 0. 32421 | 9. 680480957 | 1  |
| MSTRG. 31289. 1  | 124  | 0. 28635 | 9. 349060059 | 1  |
| MSTRG. 31291. 1  | 169  | 0. 28842 | 8. 966369629 | 1  |
| MSTRG. 31301. 1  | 136  | 0. 33699 | 5. 926818848 | 1  |
| MSTRG. 31301. 2  | 68   | 0. 29631 | 7. 81829834  | 1  |
| MSTRG. 31301. 3  | 136  | 0. 27327 | 5. 926818848 | 1  |
| MSTRG. 31301. 4  | 136  | 0. 28195 | 5. 926818848 | 1  |
| MSTRG. 31301. 5  | 136  | 0. 30505 | 5. 926818848 | 1  |
| MSTRG. 31301. 6  | 78   | 0. 30069 | 6. 139709473 | 1  |
| MSTRG. 31301. 7  | 68   | 0. 3199  | 7. 81829834  | 1  |
| MSTRG. 31307. 1  | 166  | 0. 29897 | 8. 766174316 | -1 |
| MSTRG. 31316. 2  | 608  | 0. 38259 | 11. 72369385 | -1 |
| MSTRG. 31317. 1  | 71   | 0. 34348 | 11. 51153564 | 1  |
| MSTRG. 31320. 1  | 102  | 0. 28195 | 10. 85980225 | 1  |
| MSTRG. 31320. 3  | 149  | 0. 34584 | 8. 918395996 | 1  |
| MSTRG. 31320. 2  | 149  | 0. 32534 | 8. 918395996 | 1  |
| MSTRG. 31320. 7  | 111  | 0. 33213 | 5. 130432129 | 1  |
| MSTRG. 31320. 4  | 149  | 0. 31065 | 8. 918395996 | 1  |
| MSTRG. 31320. 5  | 149  | 0. 32274 | 8. 918395996 | 1  |
| MSTRG. 31320. 6  | 149  | 0. 30813 | 8. 918395996 | 1  |
| MSTRG. 31320. 8  | 149  | 0. 36992 | 8. 918395996 | 1  |
| MSTRG. 31320. 9  | 149  | 0. 29404 | 8. 918395996 | 1  |
| MSTRG. 31320. 10 | 149  | 0. 29196 | 8. 918395996 | 1  |
| MSTRG. 31320. 11 | 132  | 0. 27758 | 5. 374206543 | 1  |
| MSTRG. 31320. 12 | 149  | 0. 27327 | 8. 918395996 | 1  |
| MSTRG. 31304. 1  | 31   | 0. 37744 | 12. 01654053 | -1 |
| MSTRG. 31324. 2  | 282  | 0. 3972  | 8. 405822754 | 1  |
| MSTRG. 31333. 2  | 487  | 0. 39107 | 8. 491760254 | 1  |
| MSTRG. 31336. 3  | 420  | 0. 37829 | 8. 967346191 | 1  |
| MSTRG. 31337. 1  | 108  | 0. 31885 | 10. 13885498 | 1  |
| MSTRG. 31341. 1  | 57   | 0. 3042  | 10. 85980225 | 1  |
| MSTRG. 31347. 1  | 1117 | 0. 44823 | 5. 555725098 | 1  |
| MSTRG. 31348. 1  | 49   | 0. 34073 | 10. 83428955 | 1  |
| MSTRG. 31350. 2  | 222  | 0. 32237 | 8. 730041504 | 1  |
| MSTRG. 31351. 3  | 433  | 0. 41499 | 9. 434509277 | 1  |
| MSTRG. 31363. 1  | 31   | 0. 42679 | 10. 7366333  | 1  |



|                  |      |          |              |    |
|------------------|------|----------|--------------|----|
| MSTRG. 31364. 5  | 125  | 0. 29615 | 9. 661682129 | 1  |
| MSTRG. 31364. 6  | 82   | 0. 29251 | 9. 721740723 | 1  |
| MSTRG. 31365. 1  | 300  | 0. 47462 | 5. 90435791  | 1  |
| MSTRG. 31367. 2  | 237  | 0. 39513 | 4. 925842285 | 1  |
| MSTRG. 31371. 1  | 106  | 0. 30884 | 9. 300231934 | 1  |
| MSTRG. 31372. 2  | 1282 | 0. 39906 | 5. 395202637 | 1  |
| MSTRG. 31374. 1  | 74   | 0. 3599  | 8. 980041504 | -1 |
| MSTRG. 31375. 1  | 63   | 0. 30191 | 6. 520202637 | 1  |
| MSTRG. 31376. 1  | 307  | 0. 39236 | 8. 487243652 | 1  |
| MSTRG. 31378. 4  | 471  | 0. 40377 | 8. 208190918 | 1  |
| MSTRG. 31379. 1  | 40   | 0. 30324 | 5. 617492676 | 1  |
| MSTRG. 31380. 2  | 316  | 0. 30958 | 7. 68182373  | 1  |
| MSTRG. 31380. 5  | 316  | 0. 30958 | 7. 68182373  | 1  |
| MSTRG. 31381. 1  | 2142 | 0. 47589 | 6. 251403809 | 1  |
| MSTRG. 31383. 1  | 112  | 0. 38597 | 8. 567810059 | 1  |
| MSTRG. 31384. 2  | 999  | 0. 3694  | 5. 27142334  | 1  |
| MSTRG. 31385. 1  | 170  | 0. 34083 | 5. 457336426 | 1  |
| MSTRG. 31386. 1  | 96   | 0. 39692 | 10. 40374756 | -1 |
| MSTRG. 31390. 1  | 20   | 0. 35674 | 7. 975524902 | -1 |
| MSTRG. 31401. 2  | 629  | 0. 41152 | 9. 331970215 | 1  |
| MSTRG. 31401. 1  | 629  | 0. 41152 | 9. 331970215 | 1  |
| MSTRG. 31401. 3  | 629  | 0. 38618 | 9. 331970215 | 1  |
| MSTRG. 31407. 1  | 173  | 0. 28567 | 10. 41546631 | 1  |
| MSTRG. 31408. 1  | 63   | 0. 27794 | 5. 989807129 | 1  |
| MSTRG. 31407. 2  | 45   | 0. 32269 | 11. 22784424 | 1  |
| MSTRG. 31419. 1  | 245  | 0. 28419 | 8. 47052002  | 1  |
| MSTRG. 31421. 1  | 173  | 0. 30781 | 9. 657287598 | 1  |
| MSTRG. 31426. 1  | 390  | 0. 4116  | 8. 719299316 | 1  |
| MSTRG. 31426. 2  | 344  | 0. 38657 | 8. 948791504 | 1  |
| MSTRG. 31431. 1  | 103  | 0. 43119 | 8. 987365723 | 1  |
| MSTRG. 31435. 6  | 414  | 0. 35333 | 5. 316833496 | 1  |
| MSTRG. 31435. 10 | 414  | 0. 3475  | 5. 316833496 | 1  |
| MSTRG. 31435. 2  | 414  | 0. 33273 | 5. 316833496 | 1  |
| MSTRG. 31435. 8  | 414  | 0. 41256 | 5. 316833496 | 1  |
| MSTRG. 31436. 1  | 48   | 0. 32646 | 5. 956481934 | 1  |
| MSTRG. 31440. 1  | 33   | 0. 45015 | 9. 18560791  | -1 |
| MSTRG. 31459. 1  | 252  | 0. 44023 | 6. 757629395 | 1  |
| MSTRG. 31474. 1  | 1721 | 0. 4611  | 6. 190124512 | 1  |
| MSTRG. 31474. 2  | 319  | 0. 31958 | 9. 096618652 | 1  |
| MSTRG. 31476. 1  | 43   | 0. 37397 | 10. 62042236 | 1  |
| MSTRG. 31477. 1  | 186  | 0. 28982 | 10. 28631592 | 1  |
| MSTRG. 31474. 3  | 104  | 0. 38046 | 9. 824279785 | 1  |
| MSTRG. 31478. 1  | 169  | 0. 28667 | 4. 932922363 | 1  |
| MSTRG. 31477. 2  | 80   | 0. 28478 | 11. 65460205 | 1  |
| MSTRG. 31479. 1  | 117  | 0. 34775 | 8. 519714355 | 1  |
| MSTRG. 31474. 4  | 95   | 0. 28982 | 8. 539855957 | 1  |
| MSTRG. 31474. 6  | 37   | 0. 36129 | 9. 218322754 | 1  |
| MSTRG. 31474. 7  | 107  | 0. 28982 | 5. 472717285 | 1  |
| MSTRG. 31480. 1  | 104  | 0. 39393 | 8. 81829834  | 1  |
| MSTRG. 31468. 2  | 698  | 0. 41944 | 6. 178771973 | 1  |
| MSTRG. 31468. 4  | 140  | 0. 39081 | 5. 047302246 | 1  |
| MSTRG. 31468. 5  | 140  | 0. 39118 | 5. 047302246 | 1  |
| MSTRG. 31484. 1  | 1181 | 0. 38182 | 8. 923278809 | 1  |
| MSTRG. 31485. 1  | 124  | 0. 2921  | 7. 72076416  | 1  |

|                 |      |         |             |    |
|-----------------|------|---------|-------------|----|
| MSTRG. 31485.2  | 124  | 0.28982 | 7.72076416  | 1  |
| MSTRG. 31493.1  | 476  | 0.34547 | 6.228820801 | 1  |
| MSTRG. 31493.2  | 598  | 0.37806 | 8.520690918 | 1  |
| MSTRG. 31505.1  | 67   | 0.32237 | 10.39654541 | 1  |
| MSTRG. 31506.1  | 237  | 0.29088 | 8.174255371 | 1  |
| MSTRG. 31505.2  | 189  | 0.28982 | 9.813537598 | 1  |
| MSTRG. 31505.4  | 112  | 0.29607 | 9.182800293 | 1  |
| MSTRG. 31505.3  | 183  | 0.28982 | 10.39141846 | 1  |
| MSTRG. 31507.1  | 243  | 0.29595 | 8.597595215 | 1  |
| MSTRG. 31505.5  | 137  | 0.27289 | 11.03106689 | 1  |
| MSTRG. 31495.1  | 105  | 0.30524 | 10.8147583  | 1  |
| MSTRG. 31511.1  | 82   | 0.29892 | 8.858703613 | 1  |
| MSTRG. 31511.2  | 82   | 0.29367 | 8.858703613 | 1  |
| MSTRG. 31512.1  | 118  | 0.28562 | 4.714172363 | 1  |
| MSTRG. 31510.4  | 182  | 0.34427 | 6.167785645 | 1  |
| MSTRG. 31510.5  | 172  | 0.31512 | 11.20111084 | 1  |
| MSTRG. 31510.7  | 172  | 0.30644 | 11.20111084 | 1  |
| MSTRG. 31510.8  | 117  | 0.33061 | 8.732727051 | 1  |
| MSTRG. 31510.9  | 29   | 0.30375 | 8.345397949 | 1  |
| MSTRG. 31513.1  | 131  | 0.28165 | 9.453430176 | 1  |
| MSTRG. 31515.1  | 114  | 0.33466 | 10.03387451 | 1  |
| MSTRG. 31517.1  | 41   | 0.39337 | 8.38458252  | -1 |
| MSTRG. 31522.1  | 70   | 0.45838 | 10.27728271 | -1 |
| MSTRG. 31525.1  | 234  | 0.44456 | 9.449035645 | 1  |
| MSTRG. 31525.2  | 535  | 0.48034 | 6.563537598 | 1  |
| MSTRG. 31526.1  | 30   | 0.40187 | 5.971618652 | -1 |
| MSTRG. 31527.1  | 81   | 0.33179 | 9.693664551 | 1  |
| MSTRG. 31531.1  | 144  | 0.42059 | 6.581848145 | 1  |
| MSTRG. 31531.2  | 81   | 0.32823 | 9.179992676 | 1  |
| MSTRG. 31532.2  | 557  | 0.45607 | 4.726501465 | 1  |
| MSTRG. 31531.4  | 987  | 0.50079 | 5.685241699 | 1  |
| MSTRG. 31533.1  | 55   | 0.30085 | 9.890686035 | 1  |
| MSTRG. 31531.8  | 89   | 0.36845 | 5.609558105 | 1  |
| MSTRG. 31536.1  | 53   | 0.35757 | 11.3682251  | 1  |
| MSTRG. 31537.13 | 177  | 0.43611 | 6.124938965 | 1  |
| MSTRG. 31543.1  | 1498 | 0.40547 | 7.163024902 | 1  |
| MSTRG. 31544.3  | 82   | 0.32037 | 9.567932129 | 1  |
| MSTRG. 31546.5  | 568  | 0.47883 | 9.96697998  | 1  |
| MSTRG. 31546.7  | 1149 | 0.46219 | 5.638122559 | 1  |
| MSTRG. 31548.1  | 385  | 0.29202 | 8.86126709  | 1  |
| MSTRG. 31548.2  | 385  | 0.29202 | 8.86126709  | 1  |
| MSTRG. 31548.3  | 385  | 0.29202 | 8.86126709  | 1  |
| MSTRG. 31548.4  | 488  | 0.29202 | 9.112121582 | 1  |
| MSTRG. 31548.5  | 385  | 0.28518 | 8.86126709  | 1  |
| MSTRG. 31549.3  | 81   | 0.47146 | 5.52935791  | 1  |
| MSTRG. 31551.3  | 293  | 0.41142 | 5.233581543 | 1  |
| MSTRG. 31551.2  | 331  | 0.42447 | 5.681335449 | 1  |
| MSTRG. 31552.1  | 90   | 0.32614 | 6.380065918 | 1  |
| MSTRG. 31551.4  | 300  | 0.3865  | 5.507019043 | 1  |
| MSTRG. 31559.1  | 348  | 0.38439 | 6.738830566 | 1  |
| MSTRG. 31559.3  | 302  | 0.35421 | 6.485046387 | 1  |
| MSTRG. 31559.4  | 302  | 0.3908  | 6.485046387 | 1  |
| MSTRG. 31559.5  | 302  | 0.3908  | 6.485046387 | 1  |
| MSTRG. 31559.6  | 302  | 0.36467 | 6.485046387 | 1  |

|                  |     |          |              |    |
|------------------|-----|----------|--------------|----|
| MSTRG. 31563. 1  | 463 | 0. 44292 | 5. 949035645 | 1  |
| MSTRG. 31564. 2  | 921 | 0. 45605 | 6. 210510254 | 1  |
| MSTRG. 31565. 1  | 17  | 0. 37436 | 8. 189025879 | 1  |
| MSTRG. 31566. 2  | 172 | 0. 37611 | 8. 870178223 | 1  |
| MSTRG. 31570. 4  | 373 | 0. 43571 | 8. 534606934 | 1  |
| MSTRG. 31570. 5  | 568 | 0. 45274 | 6. 158752441 | 1  |
| MSTRG. 31570. 3  | 568 | 0. 33019 | 6. 158752441 | 1  |
| MSTRG. 31570. 6  | 568 | 0. 43678 | 6. 158752441 | 1  |
| MSTRG. 31570. 9  | 384 | 0. 38233 | 8. 893859863 | 1  |
| MSTRG. 31570. 8  | 296 | 0. 42252 | 9. 212097168 | 1  |
| MSTRG. 31570. 7  | 568 | 0. 29308 | 6. 158752441 | 1  |
| MSTRG. 31571. 2  | 73  | 0. 31678 | 8. 885803223 | 1  |
| MSTRG. 31571. 1  | 132 | 0. 28396 | 10. 52593994 | 1  |
| MSTRG. 31571. 3  | 132 | 0. 2782  | 10. 52593994 | 1  |
| MSTRG. 31571. 4  | 132 | 0. 28396 | 10. 52593994 | 1  |
| MSTRG. 31567. 2  | 184 | 0. 45141 | 6. 21685791  | 1  |
| MSTRG. 31576. 1  | 33  | 0. 44745 | 8. 34197998  | -1 |
| MSTRG. 31581. 4  | 329 | 0. 32863 | 9. 436706543 | 1  |
| MSTRG. 31586. 5  | 120 | 0. 37079 | 6. 564758301 | -1 |
| MSTRG. 31584. 2  | 268 | 0. 33265 | 6. 794250488 | 1  |
| MSTRG. 31591. 1  | 56  | 0. 40327 | 4. 616027832 | 1  |
| MSTRG. 31598. 1  | 497 | 0. 3548  | 5. 237243652 | 1  |
| MSTRG. 31598. 2  | 424 | 0. 36506 | 4. 767272949 | 1  |
| MSTRG. 31598. 3  | 424 | 0. 36506 | 4. 767272949 | 1  |
| MSTRG. 31598. 5  | 424 | 0. 36258 | 4. 767272949 | 1  |
| MSTRG. 31598. 4  | 424 | 0. 3871  | 4. 767272949 | 1  |
| MSTRG. 31599. 3  | 357 | 0. 45437 | 5. 614562988 | 1  |
| MSTRG. 31599. 4  | 357 | 0. 45437 | 5. 614562988 | 1  |
| MSTRG. 31597. 1  | 229 | 0. 41222 | 4. 943054199 | 1  |
| MSTRG. 31597. 2  | 229 | 0. 40757 | 4. 943054199 | 1  |
| MSTRG. 31603. 2  | 375 | 0. 36473 | 8. 90838623  | 1  |
| MSTRG. 31603. 3  | 399 | 0. 43594 | 7. 71697998  | 1  |
| MSTRG. 31603. 4  | 400 | 0. 43602 | 7. 71697998  | 1  |
| MSTRG. 31603. 8  | 410 | 0. 45358 | 8. 127868652 | 1  |
| MSTRG. 31603. 11 | 205 | 0. 3642  | 7. 125305176 | 1  |
| MSTRG. 31602. 2  | 246 | 0. 28958 | 10. 18389893 | 1  |
| MSTRG. 31606. 1  | 312 | 0. 31793 | 7. 690124512 | 1  |
| MSTRG. 31606. 2  | 312 | 0. 33851 | 7. 690124512 | 1  |
| MSTRG. 31606. 3  | 49  | 0. 31209 | 9. 435241699 | 1  |
| MSTRG. 31606. 4  | 84  | 0. 36432 | 10. 19232178 | 1  |
| MSTRG. 31607. 1  | 57  | 0. 33254 | 5. 777038574 | 1  |
| MSTRG. 31606. 6  | 120 | 0. 28334 | 5. 359558105 | 1  |
| MSTRG. 31606. 7  | 351 | 0. 33686 | 8. 83404541  | 1  |
| MSTRG. 31606. 8  | 286 | 0. 30576 | 9. 689758301 | 1  |
| MSTRG. 31608. 1  | 108 | 0. 27398 | 9. 124450684 | 1  |
| MSTRG. 31606. 10 | 312 | 0. 32237 | 7. 690124512 | 1  |
| MSTRG. 31606. 11 | 312 | 0. 32237 | 7. 690124512 | 1  |
| MSTRG. 31617. 1  | 663 | 0. 45353 | 4. 809631348 | 1  |
| MSTRG. 31618. 1  | 509 | 0. 42872 | 5. 855651855 | 1  |
| MSTRG. 31618. 4  | 304 | 0. 40617 | 5. 023498535 | 1  |
| MSTRG. 31618. 5  | 304 | 0. 40617 | 5. 023498535 | 1  |
| MSTRG. 31619. 1  | 240 | 0. 33674 | 4. 980529785 | 1  |
| MSTRG. 31620. 1  | 80  | 0. 3434  | 11. 54803467 | 1  |
| MSTRG. 31622. 2  | 888 | 0. 47813 | 5. 266052246 | 1  |

|                 |      |          |              |    |
|-----------------|------|----------|--------------|----|
| MSTRG. 31623. 4 | 463  | 0. 37421 | 6. 375671387 | 1  |
| MSTRG. 31625. 1 | 46   | 0. 41281 | 8. 231018066 | 1  |
| MSTRG. 31626. 3 | 1632 | 0. 35669 | 7. 792541504 | 1  |
| MSTRG. 31626. 4 | 1632 | 0. 33883 | 7. 792541504 | 1  |
| MSTRG. 31626. 5 | 1632 | 0. 34283 | 7. 792541504 | 1  |
| MSTRG. 31627. 1 | 26   | 0. 39513 | 9. 992614746 | 1  |
| MSTRG. 31613. 2 | 1094 | 0. 42091 | 6. 711364746 | 1  |
| MSTRG. 31613. 3 | 1094 | 0. 3931  | 6. 711364746 | 1  |
| MSTRG. 31614. 1 | 211  | 0. 2972  | 9. 475891113 | 1  |
| MSTRG. 31630. 5 | 1702 | 0. 45284 | 6. 077087402 | -1 |
| MSTRG. 31630. 6 | 1400 | 0. 44075 | 6. 27911377  | -1 |
| MSTRG. 31633. 1 | 56   | 0. 37619 | 11. 43719482 | 1  |
| MSTRG. 31633. 2 | 82   | 0. 35768 | 9. 731262207 | 1  |
| MSTRG. 31629. 1 | 180  | 0. 30377 | 5. 879455566 | 1  |
| MSTRG. 31636. 5 | 418  | 0. 40422 | 6. 471252441 | 1  |
| MSTRG. 31637. 2 | 120  | 0. 47659 | 5. 041687012 | 1  |
| MSTRG. 31637. 3 | 166  | 0. 46339 | 5. 44354248  | 1  |
| MSTRG. 31638. 1 | 142  | 0. 30816 | 10. 27655029 | 1  |
| MSTRG. 31640. 1 | 185  | 0. 32157 | 10. 52655029 | 1  |
| MSTRG. 31641. 1 | 64   | 0. 29217 | 4. 441223145 | 1  |
| MSTRG. 31642. 1 | 94   | 0. 33081 | 5. 089294434 | 1  |
| MSTRG. 31643. 1 | 96   | 0. 32197 | 5. 973815918 | 1  |
| MSTRG. 31637. 6 | 135  | 0. 41827 | 4. 917297363 | 1  |
| MSTRG. 31644. 2 | 211  | 0. 31137 | 9. 728088379 | 1  |
| MSTRG. 31644. 5 | 1871 | 0. 43999 | 5. 491394043 | 1  |
| MSTRG. 31648. 1 | 198  | 0. 34359 | 10. 5512085  | 1  |
| MSTRG. 31648. 2 | 99   | 0. 39937 | 10. 37493896 | 1  |
| MSTRG. 31648. 3 | 447  | 0. 31287 | 7. 92364502  | 1  |
| MSTRG. 31648. 5 | 415  | 0. 32388 | 8. 351257324 | 1  |
| MSTRG. 31650. 1 | 17   | 0. 41344 | 12. 00848389 | 1  |
| MSTRG. 31651. 2 | 294  | 0. 41011 | 7. 47467041  | 1  |
| MSTRG. 31661. 1 | 84   | 0. 31905 | 8. 480773926 | 1  |
| MSTRG. 31662. 1 | 58   | 0. 33229 | 6. 003601074 | 1  |
| MSTRG. 31672. 2 | 105  | 0. 46639 | 9. 552307129 | 1  |
| MSTRG. 31672. 3 | 462  | 0. 46302 | 5. 629577637 | 1  |
| MSTRG. 31673. 1 | 97   | 0. 36033 | 6. 226379395 | 1  |
| MSTRG. 31678. 2 | 160  | 0. 28491 | 9. 458068848 | 1  |
| MSTRG. 31678. 1 | 160  | 0. 28491 | 9. 458068848 | 1  |
| MSTRG. 31679. 2 | 1865 | 0. 49139 | 6. 952331543 | 1  |
| MSTRG. 31682. 1 | 61   | 0. 36353 | 10. 32318115 | 1  |
| MSTRG. 31690. 1 | 71   | 0. 29948 | 9. 692687988 | 1  |
| MSTRG. 31691. 1 | 1072 | 0. 39896 | 7. 089050293 | 1  |
| MSTRG. 31691. 2 | 1066 | 0. 39896 | 7. 090637207 | 1  |
| MSTRG. 31692. 1 | 43   | 0. 43892 | 8. 938903809 | 1  |
| MSTRG. 31691. 3 | 989  | 0. 42475 | 6. 932678223 | 1  |
| MSTRG. 31700. 1 | 124  | 0. 33015 | 8. 433288574 | -1 |
| MSTRG. 31703. 2 | 169  | 0. 40852 | 8. 121276855 | 1  |
| MSTRG. 31694. 1 | 162  | 0. 45998 | 7. 772521973 | -1 |
| MSTRG. 31721. 4 | 175  | 0. 39222 | 4. 474182129 | 1  |
| MSTRG. 31722. 2 | 125  | 0. 40841 | 4. 910339355 | 1  |
| MSTRG. 31723. 5 | 212  | 0. 42426 | 9. 000427246 | 1  |
| MSTRG. 31723. 6 | 201  | 0. 44828 | 9. 164978027 | 1  |
| MSTRG. 31725. 2 | 270  | 0. 38145 | 5. 815490723 | 1  |
| MSTRG. 31725. 3 | 270  | 0. 38083 | 5. 815490723 | 1  |

|                  |      |          |              |    |
|------------------|------|----------|--------------|----|
| MSTRG. 31725. 4  | 157  | 0. 30736 | 8. 113952637 | 1  |
| MSTRG. 31729. 1  | 42   | 0. 36183 | 5. 983581543 | 1  |
| MSTRG. 31742. 2  | 345  | 0. 37248 | 9. 872741699 | 1  |
| MSTRG. 31740. 1  | 674  | 0. 47328 | 6. 26385498  | 1  |
| MSTRG. 31743. 1  | 112  | 0. 39908 | 9. 913513184 | 1  |
| MSTRG. 31743. 2  | 112  | 0. 42364 | 9. 913513184 | 1  |
| MSTRG. 31743. 3  | 112  | 0. 39851 | 9. 913513184 | 1  |
| MSTRG. 31745. 3  | 581  | 0. 36078 | 5. 808776855 | 1  |
| MSTRG. 31745. 6  | 493  | 0. 43627 | 7. 327209473 | 1  |
| MSTRG. 31745. 7  | 383  | 0. 40569 | 8. 365905762 | 1  |
| MSTRG. 31746. 1  | 76   | 0. 34554 | 9. 557556152 | 1  |
| MSTRG. 31747. 1  | 70   | 0. 35537 | 7. 999084473 | 1  |
| MSTRG. 31745. 10 | 103  | 0. 35024 | 10. 65814209 | 1  |
| MSTRG. 31748. 1  | 50   | 0. 40543 | 4. 319274902 | 1  |
| MSTRG. 31748. 2  | 27   | 0. 48193 | 10. 27716064 | 1  |
| MSTRG. 31748. 3  | 50   | 0. 34544 | 4. 319274902 | 1  |
| MSTRG. 31749. 1  | 90   | 0. 37937 | 8. 373474121 | 1  |
| MSTRG. 31750. 1  | 67   | 0. 44076 | 9. 987976074 | 1  |
| MSTRG. 31753. 1  | 315  | 0. 4345  | 8. 504577637 | -1 |
| MSTRG. 31757. 4  | 1187 | 0. 46897 | 5. 319641113 | 1  |
| MSTRG. 31757. 5  | 1193 | 0. 50632 | 5. 280700684 | 1  |
| MSTRG. 31758. 1  | 748  | 0. 36223 | 7. 940734863 | 1  |
| MSTRG. 31766. 1  | 128  | 0. 28982 | 6. 040100098 | 1  |
| MSTRG. 31777. 1  | 39   | 0. 34913 | 8. 844543457 | 1  |
| MSTRG. 31763. 1  | 74   | 0. 38043 | 9. 48614502  | 1  |
| MSTRG. 31786. 3  | 70   | 0. 33115 | 9. 86541748  | 1  |
| MSTRG. 31786. 2  | 989  | 0. 47607 | 4. 50177002  | 1  |
| MSTRG. 31787. 1  | 63   | 0. 36156 | 6. 893981934 | 1  |
| MSTRG. 31786. 4  | 746  | 0. 42264 | 9. 64239502  | 1  |
| MSTRG. 31786. 7  | 505  | 0. 38568 | 9. 487365723 | 1  |
| MSTRG. 31786. 10 | 103  | 0. 40009 | 8. 712585449 | -1 |
| MSTRG. 31786. 11 | 511  | 0. 39388 | 9. 280456543 | 1  |
| MSTRG. 31786. 12 | 290  | 0. 42264 | 9. 033508301 | 1  |
| MSTRG. 31796. 5  | 384  | 0. 46801 | 7. 127380371 | 1  |
| MSTRG. 31796. 4  | 427  | 0. 35599 | 6. 155212402 | 1  |
| MSTRG. 31796. 6  | 351  | 0. 35599 | 5. 344665527 | 1  |
| MSTRG. 31797. 1  | 96   | 0. 27433 | 9. 299987793 | 1  |
| MSTRG. 31799. 1  | 616  | 0. 40418 | 6. 504211426 | 1  |
| MSTRG. 31801. 1  | 111  | 0. 37951 | 10. 0713501  | 1  |
| MSTRG. 31801. 2  | 111  | 0. 36366 | 10. 0713501  | 1  |
| MSTRG. 31801. 3  | 122  | 0. 36607 | 10. 46246338 | 1  |
| MSTRG. 31801. 4  | 95   | 0. 35913 | 10. 98626709 | 1  |
| MSTRG. 31801. 5  | 95   | 0. 30911 | 10. 98626709 | 1  |
| MSTRG. 31801. 6  | 71   | 0. 32951 | 10. 17266846 | 1  |
| MSTRG. 31801. 7  | 57   | 0. 36411 | 6. 67401123  | 1  |
| MSTRG. 31801. 8  | 92   | 0. 33447 | 7. 856994629 | 1  |
| MSTRG. 31789. 1  | 229  | 0. 44259 | 9. 72454834  | 1  |
| MSTRG. 31789. 2  | 261  | 0. 47241 | 9. 791687012 | 1  |
| MSTRG. 31790. 1  | 323  | 0. 44587 | 6. 739440918 | 1  |
| MSTRG. 31792. 2  | 246  | 0. 38485 | 9. 963684082 | 1  |
| MSTRG. 31792. 3  | 245  | 0. 48552 | 9. 963684082 | -1 |
| MSTRG. 31793. 1  | 45   | 0. 30785 | 8. 491271973 | 1  |
| MSTRG. 31793. 2  | 45   | 0. 28783 | 8. 491271973 | 1  |
| MSTRG. 31792. 4  | 219  | 0. 43346 | 8. 992370605 | 1  |

|                  |      |          |              |    |
|------------------|------|----------|--------------|----|
| MSTRG. 31803. 1  | 1481 | 0. 42466 | 8. 49786377  | 1  |
| MSTRG. 31803. 3  | 343  | 0. 36682 | 9. 299255371 | 1  |
| MSTRG. 31804. 1  | 70   | 0. 35705 | 11. 19024658 | 1  |
| MSTRG. 31805. 5  | 51   | 0. 3143  | 6. 516662598 | 1  |
| MSTRG. 31805. 3  | 119  | 0. 42723 | 5. 86505127  | 1  |
| MSTRG. 31805. 1  | 91   | 0. 35742 | 10. 03131104 | 1  |
| MSTRG. 31805. 4  | 107  | 0. 40116 | 9. 758483887 | 1  |
| MSTRG. 31806. 1  | 62   | 0. 45479 | 10. 10601807 | 1  |
| MSTRG. 31810. 1  | 77   | 0. 43947 | 9. 12298584  | 1  |
| MSTRG. 31812. 5  | 626  | 0. 38664 | 5. 540100098 | 1  |
| MSTRG. 31812. 9  | 626  | 0. 39604 | 5. 540100098 | 1  |
| MSTRG. 31812. 8  | 626  | 0. 40619 | 5. 540100098 | 1  |
| MSTRG. 31813. 1  | 41   | 0. 31402 | 7. 680480957 | -1 |
| MSTRG. 31812. 12 | 40   | 0. 34466 | 11. 61004639 | 1  |
| MSTRG. 31812. 10 | 40   | 0. 33462 | 11. 61004639 | 1  |
| MSTRG. 31815. 4  | 1119 | 0. 47913 | 4. 727844238 | 1  |
| MSTRG. 31815. 2  | 1120 | 0. 46701 | 4. 72088623  | 1  |
| MSTRG. 31815. 3  | 1119 | 0. 46701 | 4. 72088623  | 1  |
| MSTRG. 31815. 5  | 358  | 0. 44509 | 5. 946838379 | 1  |
| MSTRG. 31818. 2  | 666  | 0. 46024 | 8. 748474121 | -1 |
| MSTRG. 31818. 3  | 392  | 0. 44038 | 9. 348815918 | 1  |
| MSTRG. 31818. 7  | 392  | 0. 42462 | 9. 348815918 | 1  |
| MSTRG. 31820. 2  | 289  | 0. 29294 | 8. 290710449 | 1  |
| MSTRG. 31820. 3  | 200  | 0. 3227  | 7. 054138184 | 1  |
| MSTRG. 31820. 4  | 289  | 0. 29152 | 8. 290710449 | 1  |
| MSTRG. 31820. 5  | 200  | 0. 29294 | 7. 054138184 | 1  |
| MSTRG. 31820. 6  | 289  | 0. 29152 | 8. 290710449 | 1  |
| MSTRG. 31820. 7  | 200  | 0. 294   | 7. 054138184 | 1  |
| MSTRG. 31820. 8  | 289  | 0. 294   | 8. 290710449 | 1  |
| MSTRG. 31820. 9  | 73   | 0. 27781 | 6. 250793457 | 1  |
| MSTRG. 31822. 2  | 472  | 0. 44299 | 8. 098449707 | 1  |
| MSTRG. 31824. 1  | 120  | 0. 2921  | 9. 439880371 | 1  |
| MSTRG. 31826. 1  | 73   | 0. 33718 | 5. 497619629 | 1  |
| MSTRG. 31829. 1  | 41   | 0. 37395 | 6. 949890137 | 1  |
| MSTRG. 31833. 4  | 273  | 0. 41513 | 9. 515441895 | 1  |
| MSTRG. 31838. 1  | 40   | 0. 33276 | 5. 426086426 | 1  |
| MSTRG. 31839. 2  | 476  | 0. 46315 | 6. 46697998  | 1  |
| MSTRG. 31865. 1  | 315  | 0. 47755 | 6. 009338379 | 1  |
| MSTRG. 31867. 3  | 2047 | 0. 43852 | 5. 614196777 | 1  |
| MSTRG. 31867. 5  | 2320 | 0. 45395 | 5. 457214355 | 1  |
| MSTRG. 31867. 7  | 2289 | 0. 45395 | 5. 528747559 | 1  |
| MSTRG. 31867. 6  | 2325 | 0. 44135 | 5. 491149902 | 1  |
| MSTRG. 31868. 1  | 76   | 0. 39442 | 9. 897399902 | 1  |
| MSTRG. 31867. 8  | 52   | 0. 3305  | 11. 71258545 | 1  |
| MSTRG. 31859. 4  | 591  | 0. 45762 | 6. 280456543 | 1  |
| MSTRG. 31859. 3  | 589  | 0. 45534 | 6. 067443848 | 1  |
| MSTRG. 31861. 2  | 292  | 0. 34213 | 8. 797790527 | 1  |
| MSTRG. 31875. 1  | 53   | 0. 31337 | 11. 63653564 | 1  |
| MSTRG. 31883. 1  | 54   | 0. 44888 | 10. 00872803 | 1  |
| MSTRG. 31885. 3  | 180  | 0. 33623 | 8. 063781738 | 1  |
| MSTRG. 31885. 4  | 144  | 0. 34628 | 8. 645812988 | 1  |
| MSTRG. 31886. 1  | 88   | 0. 30303 | 5. 788024902 | 1  |
| MSTRG. 31886. 2  | 88   | 0. 29059 | 5. 788024902 | 1  |
| MSTRG. 31897. 1  | 169  | 0. 32072 | 5. 683288574 | 1  |

|                  |      |          |              |    |
|------------------|------|----------|--------------|----|
| MSTRG. 31898. 1  | 163  | 0. 35469 | 9. 974060059 | 1  |
| MSTRG. 31897. 2  | 208  | 0. 34731 | 9. 854553223 | 1  |
| MSTRG. 31904. 1  | 68   | 0. 36729 | 11. 92462158 | 1  |
| MSTRG. 31907. 1  | 156  | 0. 34563 | 10. 40887451 | 1  |
| MSTRG. 31905. 1  | 69   | 0. 39076 | 10. 48516846 | 1  |
| MSTRG. 31909. 1  | 109  | 0. 38714 | 7. 859069824 | 1  |
| MSTRG. 31910. 1  | 375  | 0. 40505 | 9. 542907715 | 1  |
| MSTRG. 31911. 2  | 133  | 0. 41958 | 6. 061828613 | 1  |
| MSTRG. 31914. 2  | 90   | 0. 27454 | 4. 996765137 | 1  |
| MSTRG. 31914. 3  | 84   | 0. 30483 | 8. 63458252  | 1  |
| MSTRG. 31917. 7  | 45   | 0. 35527 | 8. 771057129 | 1  |
| MSTRG. 31919. 1  | 303  | 0. 33085 | 7. 972839355 | 1  |
| MSTRG. 31920. 6  | 413  | 0. 46611 | 5. 63861084  | 1  |
| MSTRG. 31920. 8  | 315  | 0. 47769 | 5. 252990723 | 1  |
| MSTRG. 31920. 9  | 315  | 0. 47769 | 5. 252990723 | 1  |
| MSTRG. 31923. 1  | 72   | 0. 39647 | 7. 836486816 | 1  |
| MSTRG. 31923. 2  | 100  | 0. 44146 | 8. 397644043 | 1  |
| MSTRG. 31994. 3  | 216  | 0. 4474  | 9. 210754395 | 1  |
| MSTRG. 31998. 2  | 144  | 0. 46478 | 9. 041931152 | 1  |
| MSTRG. 31999. 1  | 178  | 0. 3592  | 7. 662658691 | 1  |
| MSTRG. 32003. 1  | 231  | 0. 36388 | 10. 09539795 | 1  |
| MSTRG. 32003. 2  | 231  | 0. 36388 | 10. 09539795 | 1  |
| MSTRG. 32016. 1  | 183  | 0. 38524 | 10. 17498779 | 1  |
| MSTRG. 32029. 1  | 70   | 0. 35276 | 7. 84576416  | 1  |
| MSTRG. 32030. 1  | 66   | 0. 32624 | 6. 898742676 | 1  |
| MSTRG. 32051. 1  | 31   | 0. 35188 | 9. 996276855 | 1  |
| MSTRG. 32052. 1  | 352  | 0. 36365 | 8. 140808105 | 1  |
| MSTRG. 32052. 2  | 366  | 0. 36365 | 7. 063049316 | 1  |
| MSTRG. 31935. 1  | 527  | 0. 35736 | 6. 398010254 | 1  |
| MSTRG. 31935. 2  | 528  | 0. 45095 | 6. 398254395 | 1  |
| MSTRG. 31935. 6  | 522  | 0. 38015 | 6. 162658691 | 1  |
| MSTRG. 31935. 8  | 519  | 0. 39906 | 6. 375061035 | 1  |
| MSTRG. 31935. 9  | 410  | 0. 42508 | 6. 046081543 | 1  |
| MSTRG. 31935. 10 | 64   | 0. 4218  | 5. 51348877  | 1  |
| MSTRG. 31936. 3  | 48   | 0. 36357 | 4. 319274902 | 1  |
| MSTRG. 31939. 1  | 65   | 0. 38645 | 8. 801208496 | 1  |
| MSTRG. 31939. 2  | 65   | 0. 40575 | 8. 801208496 | 1  |
| MSTRG. 31939. 3  | 60   | 0. 38897 | 5. 503723145 | 1  |
| MSTRG. 31939. 4  | 30   | 0. 39462 | 9. 77911377  | 1  |
| MSTRG. 31940. 1  | 100  | 0. 30709 | 5. 107727051 | 1  |
| MSTRG. 31941. 1  | 84   | 0. 33101 | 6. 490661621 | 1  |
| MSTRG. 31941. 2  | 72   | 0. 29772 | 10. 00872803 | 1  |
| MSTRG. 31941. 3  | 72   | 0. 29367 | 10. 00872803 | 1  |
| MSTRG. 31941. 4  | 72   | 0. 29595 | 10. 00872803 | 1  |
| MSTRG. 31942. 4  | 94   | 0. 28527 | 10. 18756104 | 1  |
| MSTRG. 31928. 2  | 699  | 0. 43219 | 7. 315734863 | 1  |
| MSTRG. 31930. 1  | 86   | 0. 43293 | 6. 876403809 | -1 |
| MSTRG. 31930. 2  | 389  | 0. 35209 | 8. 35345459  | 1  |
| MSTRG. 31948. 1  | 98   | 0. 32993 | 6. 48651123  | 1  |
| MSTRG. 31963. 1  | 51   | 0. 40364 | 9. 996887207 | 1  |
| MSTRG. 31968. 1  | 150  | 0. 34428 | 10. 94744873 | 1  |
| MSTRG. 31981. 1  | 158  | 0. 31287 | 9. 319763184 | 1  |
| MSTRG. 31990. 1  | 85   | 0. 3231  | 7. 634338379 | 1  |
| MSTRG. 31992. 2  | 2696 | 0. 42449 | 6. 074645996 | 1  |

|                 |      |          |              |    |
|-----------------|------|----------|--------------|----|
| MSTRG. 32053. 1 | 478  | 0. 41359 | 7. 624938965 | 1  |
| MSTRG. 32054. 1 | 146  | 0. 45585 | 8. 432678223 | 1  |
| MSTRG. 32056. 2 | 110  | 0. 29772 | 8. 091247559 | 1  |
| MSTRG. 32056. 3 | 570  | 0. 29988 | 6. 682067871 | 1  |
| MSTRG. 32058. 1 | 170  | 0. 3272  | 11. 20367432 | 1  |
| MSTRG. 32059. 1 | 328  | 0. 4349  | 4. 925720215 | 1  |
| MSTRG. 32068. 2 | 438  | 0. 39455 | 9. 479064941 | 1  |
| MSTRG. 32055. 2 | 72   | 0. 3896  | 8. 96270752  | 1  |
| MSTRG. 32069. 2 | 74   | 0. 3594  | 6. 696228027 | 1  |
| MSTRG. 32070. 3 | 122  | 0. 37646 | 6. 72857666  | 1  |
| MSTRG. 32072. 3 | 76   | 0. 3208  | 10. 42791748 | 1  |
| MSTRG. 32076. 5 | 459  | 0. 35625 | 9. 067810059 | 1  |
| MSTRG. 32076. 7 | 320  | 0. 3653  | 9. 499816895 | 1  |
| MSTRG. 32076. 3 | 464  | 0. 3535  | 9. 712585449 | 1  |
| MSTRG. 32076. 4 | 563  | 0. 37981 | 9. 713317871 | 1  |
| MSTRG. 32076. 6 | 377  | 0. 35726 | 9. 977111816 | 1  |
| MSTRG. 32077. 1 | 26   | 0. 43137 | 8. 023376465 | 1  |
| MSTRG. 32078. 1 | 389  | 0. 35909 | 9. 02911377  | 1  |
| MSTRG. 32084. 1 | 102  | 0. 30068 | 10. 28485107 | 1  |
| MSTRG. 32085. 1 | 54   | 0. 3927  | 6. 94744873  | 1  |
| MSTRG. 32086. 1 | 107  | 0. 3199  | 6. 25567627  | 1  |
| MSTRG. 32091. 1 | 123  | 0. 38939 | 10. 69378662 | 1  |
| MSTRG. 32091. 2 | 139  | 0. 44272 | 9. 860656738 | 1  |
| MSTRG. 32104. 3 | 138  | 0. 43453 | 4. 643249512 | 1  |
| MSTRG. 32105. 1 | 85   | 0. 3601  | 8. 780822754 | -1 |
| MSTRG. 32106. 1 | 31   | 0. 38819 | 5. 823303223 | 1  |
| MSTRG. 32107. 1 | 42   | 0. 31977 | 6. 88873291  | 1  |
| MSTRG. 32108. 2 | 51   | 0. 41042 | 8. 837341309 | 1  |
| MSTRG. 32108. 1 | 45   | 0. 27818 | 9. 222351074 | 1  |
| MSTRG. 32109. 1 | 57   | 0. 30925 | 5. 573181152 | 1  |
| MSTRG. 32110. 1 | 65   | 0. 31122 | 9. 09942627  | 1  |
| MSTRG. 32104. 4 | 94   | 0. 29343 | 7. 58770752  | 1  |
| MSTRG. 32111. 1 | 108  | 0. 30918 | 8. 321838379 | 1  |
| MSTRG. 32112. 1 | 73   | 0. 30804 | 4. 63458252  | 1  |
| MSTRG. 32094. 1 | 68   | 0. 44626 | 9. 468322754 | -1 |
| MSTRG. 32094. 2 | 68   | 0. 44731 | 9. 468322754 | -1 |
| MSTRG. 32113. 1 | 63   | 0. 51241 | 8. 010070801 | -1 |
| MSTRG. 32114. 2 | 37   | 0. 44097 | 4. 352355957 | 1  |
| MSTRG. 32115. 1 | 30   | 0. 29695 | 11. 43719482 | 1  |
| MSTRG. 32116. 2 | 75   | 0. 30104 | 9. 326843262 | 1  |
| MSTRG. 32119. 1 | 52   | 0. 31377 | 9. 393615723 | 1  |
| MSTRG. 32123. 1 | 27   | 0. 32918 | 9. 688171387 | 1  |
| MSTRG. 32128. 1 | 87   | 0. 35005 | 7. 73638916  | 1  |
| MSTRG. 32129. 1 | 56   | 0. 39514 | 11. 27325439 | -1 |
| MSTRG. 32130. 2 | 47   | 0. 36755 | 9. 494689941 | -1 |
| MSTRG. 32130. 1 | 63   | 0. 39286 | 10. 0479126  | 1  |
| MSTRG. 32130. 3 | 76   | 0. 36854 | 8. 667053223 | 1  |
| MSTRG. 32133. 1 | 152  | 0. 32388 | 9. 93572998  | 1  |
| MSTRG. 32134. 1 | 360  | 0. 35415 | 5. 04107666  | 1  |
| MSTRG. 32134. 2 | 460  | 0. 37751 | 4. 848327637 | 1  |
| MSTRG. 32134. 4 | 75   | 0. 2921  | 10. 29888916 | 1  |
| MSTRG. 32137. 1 | 2068 | 0. 39136 | 8. 884216309 | 1  |
| MSTRG. 32137. 2 | 2068 | 0. 40398 | 8. 884216309 | 1  |
| MSTRG. 32137. 3 | 2068 | 0. 41661 | 8. 884216309 | 1  |



|                 |      |          |              |    |
|-----------------|------|----------|--------------|----|
| MSTRG. 32136. 1 | 129  | 0. 32544 | 10. 06744385 | 1  |
| MSTRG. 32140. 1 | 27   | 0. 34933 | 11. 82440186 | 1  |
| MSTRG. 32141. 1 | 849  | 0. 4559  | 8. 472717285 | 1  |
| MSTRG. 32142. 1 | 111  | 0. 34081 | 9. 690734863 | 1  |
| MSTRG. 32143. 4 | 425  | 0. 45543 | 8. 957092285 | 1  |
| MSTRG. 32146. 1 | 539  | 0. 46206 | 4. 865539551 | 1  |
| MSTRG. 32154. 2 | 139  | 0. 32508 | 9. 500061035 | 1  |
| MSTRG. 32155. 1 | 597  | 0. 3961  | 9. 596496582 | 1  |
| MSTRG. 32155. 2 | 597  | 0. 39341 | 9. 596496582 | 1  |
| MSTRG. 32158. 3 | 211  | 0. 48983 | 5. 902160645 | -1 |
| MSTRG. 32163. 1 | 58   | 0. 45871 | 9. 246643066 | -1 |
| MSTRG. 32164. 1 | 361  | 0. 48349 | 8. 845031738 | 1  |
| MSTRG. 32150. 2 | 344  | 0. 40946 | 8. 951599121 | 1  |
| MSTRG. 32150. 3 | 548  | 0. 46239 | 8. 884094238 | 1  |
| MSTRG. 32167. 2 | 83   | 0. 33234 | 9. 688171387 | 1  |
| MSTRG. 32167. 3 | 79   | 0. 32305 | 9. 198181152 | 1  |
| MSTRG. 32168. 1 | 31   | 0. 39551 | 6. 009094238 | 1  |
| MSTRG. 32169. 2 | 158  | 0. 36406 | 7. 001403809 | 1  |
| MSTRG. 32166. 1 | 77   | 0. 42773 | 9. 694885254 | 1  |
| MSTRG. 32172. 2 | 187  | 0. 2996  | 4. 725524902 | 1  |
| MSTRG. 32176. 4 | 486  | 0. 40811 | 8. 632385254 | 1  |
| MSTRG. 32176. 3 | 331  | 0. 39282 | 8. 296691895 | 1  |
| MSTRG. 32177. 1 | 147  | 0. 43999 | 4. 88470459  | 1  |
| MSTRG. 32180. 1 | 434  | 0. 30835 | 6. 903259277 | 1  |
| MSTRG. 32181. 4 | 469  | 0. 4185  | 9. 10345459  | 1  |
| MSTRG. 32183. 6 | 118  | 0. 28739 | 11. 67352295 | 1  |
| MSTRG. 32184. 1 | 76   | 0. 32914 | 6. 695373535 | 1  |
| MSTRG. 32184. 3 | 115  | 0. 41021 | 9. 032897949 | 1  |
| MSTRG. 32199. 1 | 144  | 0. 28432 | 10. 76629639 | 1  |
| MSTRG. 32199. 2 | 54   | 0. 35469 | 9. 300476074 | 1  |
| MSTRG. 32199. 3 | 126  | 0. 27691 | 7. 883483887 | 1  |
| MSTRG. 32201. 1 | 111  | 0. 46622 | 9. 181213379 | 1  |
| MSTRG. 32203. 2 | 483  | 0. 46265 | 6. 139587402 | 1  |
| MSTRG. 32203. 4 | 369  | 0. 4627  | 8. 487487793 | 1  |
| MSTRG. 32206. 2 | 351  | 0. 43808 | 6. 149841309 | 1  |
| MSTRG. 32206. 4 | 381  | 0. 39474 | 6. 651184082 | 1  |
| MSTRG. 32206. 5 | 351  | 0. 44188 | 6. 149841309 | 1  |
| MSTRG. 32208. 2 | 316  | 0. 46268 | 5. 637268066 | 1  |
| MSTRG. 32204. 2 | 121  | 0. 30515 | 8. 092346191 | 1  |
| MSTRG. 32212. 1 | 119  | 0. 32785 | 9. 162536621 | 1  |
| MSTRG. 32225. 1 | 96   | 0. 38037 | 8. 461486816 | 1  |
| MSTRG. 32227. 1 | 36   | 0. 32131 | 7. 999084473 | -1 |
| MSTRG. 32229. 2 | 142  | 0. 3841  | 9. 545837402 | 1  |
| MSTRG. 32232. 1 | 2043 | 0. 4119  | 6. 68951416  | 1  |
| MSTRG. 32232. 2 | 2082 | 0. 41469 | 6. 72467041  | 1  |
| MSTRG. 32231. 1 | 65   | 0. 43989 | 10. 41998291 | -1 |
| MSTRG. 32231. 2 | 64   | 0. 42125 | 10. 41986084 | -1 |
| MSTRG. 32237. 2 | 154  | 0. 44393 | 6. 59954834  | 1  |
| MSTRG. 32238. 1 | 72   | 0. 41637 | 9. 255310059 | 1  |
| MSTRG. 32239. 1 | 181  | 0. 42138 | 4. 932189941 | 1  |
| MSTRG. 32241. 1 | 39   | 0. 40989 | 4. 075378418 | 1  |
| MSTRG. 32242. 1 | 101  | 0. 41233 | 9. 34967041  | 1  |
| MSTRG. 32246. 2 | 503  | 0. 28855 | 9. 638122559 | 1  |
| MSTRG. 32246. 3 | 1005 | 0. 42308 | 6. 576477051 | 1  |

|                  |      |          |              |    |
|------------------|------|----------|--------------|----|
| MSTRG. 32249. 1  | 453  | 0. 34971 | 5. 886901855 | 1  |
| MSTRG. 32249. 5  | 615  | 0. 35391 | 5. 64654541  | 1  |
| MSTRG. 32250. 1  | 111  | 0. 35224 | 9. 546936035 | 1  |
| MSTRG. 32251. 1  | 58   | 0. 38928 | 11. 55377197 | 1  |
| MSTRG. 32251. 2  | 123  | 0. 31793 | 5. 195617676 | 1  |
| MSTRG. 32252. 1  | 45   | 0. 38871 | 5. 042541504 | 1  |
| MSTRG. 32254. 1  | 1057 | 0. 43591 | 5. 196716309 | 1  |
| MSTRG. 32257. 1  | 50   | 0. 33008 | 6. 366760254 | 1  |
| MSTRG. 32260. 2  | 281  | 0. 40026 | 9. 80255127  | 1  |
| MSTRG. 32265. 1  | 235  | 0. 43238 | 5. 159729004 | 1  |
| MSTRG. 32266. 1  | 127  | 0. 37519 | 9. 585144043 | 1  |
| MSTRG. 32267. 1  | 127  | 0. 38387 | 9. 206604004 | 1  |
| MSTRG. 32270. 2  | 154  | 0. 34227 | 10. 12969971 | 1  |
| MSTRG. 32275. 3  | 242  | 0. 33799 | 9. 415344238 | 1  |
| MSTRG. 32275. 1  | 242  | 0. 31738 | 9. 415344238 | 1  |
| MSTRG. 32275. 2  | 242  | 0. 34912 | 9. 415344238 | 1  |
| MSTRG. 32275. 6  | 242  | 0. 36148 | 9. 415344238 | 1  |
| MSTRG. 32275. 7  | 242  | 0. 34608 | 9. 415344238 | 1  |
| MSTRG. 32276. 4  | 254  | 0. 35188 | 8. 797424316 | 1  |
| MSTRG. 32278. 3  | 479  | 0. 405   | 8. 67376709  | 1  |
| MSTRG. 32278. 4  | 470  | 0. 405   | 8. 193908691 | 1  |
| MSTRG. 32277. 1  | 292  | 0. 36602 | 6. 069763184 | 1  |
| MSTRG. 32283. 1  | 269  | 0. 40168 | 9. 164489746 | 1  |
| MSTRG. 32283. 2  | 257  | 0. 40743 | 8. 931335449 | 1  |
| MSTRG. 32285. 1  | 65   | 0. 29936 | 10. 53009033 | 1  |
| MSTRG. 32286. 1  | 211  | 0. 33512 | 9. 38861084  | 1  |
| MSTRG. 32289. 1  | 466  | 0. 4216  | 6. 75592041  | -1 |
| MSTRG. 32291. 2  | 74   | 0. 40342 | 8. 085021973 | 1  |
| MSTRG. 32292. 1  | 380  | 0. 43467 | 8. 683654785 | 1  |
| MSTRG. 32292. 3  | 380  | 0. 44034 | 8. 683654785 | 1  |
| MSTRG. 32293. 1  | 397  | 0. 4151  | 9. 460388184 | 1  |
| MSTRG. 32300. 3  | 314  | 0. 42022 | 6. 393859863 | 1  |
| MSTRG. 32300. 5  | 322  | 0. 42792 | 6. 394592285 | 1  |
| MSTRG. 32301. 3  | 585  | 0. 47768 | 6. 074645996 | 1  |
| MSTRG. 32305. 2  | 308  | 0. 38079 | 7. 001159668 | 1  |
| MSTRG. 32324. 12 | 3350 | 0. 44722 | 5. 846496582 | 1  |
| MSTRG. 32324. 17 | 3425 | 0. 44722 | 5. 829162598 | 1  |
| MSTRG. 32324. 18 | 3572 | 0. 44474 | 5. 767883301 | 1  |
| MSTRG. 32324. 20 | 3270 | 0. 4395  | 5. 839416504 | 1  |
| MSTRG. 32324. 21 | 3668 | 0. 44722 | 5. 795593262 | 1  |
| MSTRG. 32324. 3  | 2125 | 0. 44004 | 6. 083679199 | 1  |
| MSTRG. 32324. 33 | 3338 | 0. 44722 | 5. 901428223 | 1  |
| MSTRG. 32324. 35 | 2967 | 0. 44438 | 5. 890319824 | 1  |
| MSTRG. 32324. 38 | 3270 | 0. 4395  | 5. 831237793 | 1  |
| MSTRG. 32324. 40 | 2973 | 0. 44438 | 5. 873596191 | 1  |
| MSTRG. 32324. 43 | 3600 | 0. 44722 | 5. 821960449 | 1  |
| MSTRG. 32324. 47 | 4011 | 0. 44102 | 5. 815979004 | 1  |
| MSTRG. 32324. 49 | 3614 | 0. 44102 | 5. 751525879 | 1  |
| MSTRG. 32324. 50 | 3850 | 0. 44102 | 5. 742858887 | 1  |
| MSTRG. 32324. 53 | 2758 | 0. 44066 | 5. 940979004 | 1  |
| MSTRG. 32324. 55 | 3350 | 0. 44102 | 5. 854675293 | 1  |
| MSTRG. 32324. 56 | 4058 | 0. 44102 | 5. 755432129 | 1  |
| MSTRG. 32324. 7  | 3142 | 0. 4457  | 5. 863098145 | 1  |
| MSTRG. 32324. 9  | 3936 | 0. 44102 | 5. 820495605 | 1  |

|                  |     |          |              |   |
|------------------|-----|----------|--------------|---|
| MSTRG. 32310. 3  | 944 | 0. 44654 | 5. 784118652 | 1 |
| MSTRG. 32310. 4  | 966 | 0. 44654 | 5. 864807129 | 1 |
| MSTRG. 32322. 7  | 396 | 0. 46479 | 5. 730285645 | 1 |
| MSTRG. 32322. 10 | 394 | 0. 44517 | 5. 730285645 | 1 |
| MSTRG. 32322. 12 | 397 | 0. 44517 | 5. 730285645 | 1 |
| MSTRG. 32322. 8  | 394 | 0. 42671 | 5. 730285645 | 1 |
| MSTRG. 32322. 11 | 397 | 0. 42485 | 5. 730285645 | 1 |
| MSTRG. 32322. 3  | 396 | 0. 42671 | 5. 730285645 | 1 |
| MSTRG. 32322. 4  | 460 | 0. 44588 | 5. 42791748  | 1 |
| MSTRG. 32322. 9  | 460 | 0. 47224 | 5. 42791748  | 1 |
| MSTRG. 32322. 2  | 460 | 0. 43235 | 5. 42791748  | 1 |
| MSTRG. 32322. 16 | 460 | 0. 47016 | 5. 42791748  | 1 |
| MSTRG. 32323. 1  | 75  | 0. 29455 | 7. 652038574 | 1 |
| MSTRG. 32320. 3  | 191 | 0. 37573 | 9. 399963379 | 1 |
| MSTRG. 32331. 1  | 513 | 0. 34908 | 5. 015197754 | 1 |
| MSTRG. 32331. 3  | 513 | 0. 34908 | 5. 015197754 | 1 |
| MSTRG. 32331. 4  | 513 | 0. 37218 | 5. 015197754 | 1 |
| MSTRG. 32331. 5  | 513 | 0. 4423  | 5. 015197754 | 1 |
| MSTRG. 32331. 6  | 531 | 0. 43623 | 4. 987731934 | 1 |
| MSTRG. 32334. 1  | 619 | 0. 40661 | 9. 130432129 | 1 |
| MSTRG. 32334. 2  | 619 | 0. 40599 | 9. 130432129 | 1 |
| MSTRG. 32334. 3  | 619 | 0. 45555 | 9. 130432129 | 1 |
| MSTRG. 32338. 1  | 22  | 0. 35876 | 8. 93963623  | 1 |
| MSTRG. 32339. 2  | 62  | 0. 40692 | 9. 494934082 | 1 |
| MSTRG. 32339. 1  | 134 | 0. 2872  | 7. 698425293 | 1 |
| MSTRG. 32339. 3  | 113 | 0. 34056 | 9. 985534668 | 1 |
| MSTRG. 32338. 4  | 385 | 0. 41078 | 8. 484802246 | 1 |
| MSTRG. 32338. 6  | 385 | 0. 36773 | 8. 484802246 | 1 |
| MSTRG. 32338. 7  | 385 | 0. 39898 | 8. 484802246 | 1 |
| MSTRG. 32329. 1  | 160 | 0. 33787 | 6. 06072998  | 1 |
| MSTRG. 32329. 2  | 179 | 0. 30917 | 11. 78814697 | 1 |
| MSTRG. 32329. 3  | 94  | 0. 30429 | 12. 66937256 | 1 |
| MSTRG. 32329. 5  | 94  | 0. 36869 | 12. 66937256 | 1 |
| MSTRG. 32329. 6  | 108 | 0. 32431 | 6. 256164551 | 1 |
| MSTRG. 32329. 7  | 94  | 0. 40829 | 12. 66937256 | 1 |
| MSTRG. 32340. 2  | 368 | 0. 29772 | 5. 07635498  | 1 |
| MSTRG. 32340. 4  | 226 | 0. 4151  | 4. 956848145 | 1 |
| MSTRG. 32342. 1  | 237 | 0. 36706 | 8. 670349121 | 1 |
| MSTRG. 32343. 2  | 75  | 0. 43518 | 8. 81842041  | 1 |
| MSTRG. 32344. 1  | 46  | 0. 39759 | 11. 35064697 | 1 |
| MSTRG. 32350. 3  | 732 | 0. 46122 | 9. 692321777 | 1 |
| MSTRG. 32354. 2  | 241 | 0. 43298 | 5. 235412598 | 1 |
| MSTRG. 32354. 3  | 129 | 0. 43376 | 5. 015075684 | 1 |
| MSTRG. 32356. 1  | 677 | 0. 40947 | 5. 957214355 | 1 |
| MSTRG. 32358. 2  | 429 | 0. 45654 | 6. 211364746 | 1 |
| MSTRG. 32358. 3  | 550 | 0. 4573  | 6. 082824707 | 1 |
| MSTRG. 32358. 4  | 368 | 0. 4778  | 5. 882873535 | 1 |
| MSTRG. 32364. 3  | 150 | 0. 38784 | 6. 569885254 | 1 |
| MSTRG. 32365. 1  | 127 | 0. 34815 | 10. 5947876  | 1 |
| MSTRG. 32365. 2  | 127 | 0. 33606 | 10. 5947876  | 1 |
| MSTRG. 32366. 5  | 111 | 0. 34558 | 9. 554016113 | 1 |
| MSTRG. 32369. 4  | 157 | 0. 28583 | 10. 92559814 | 1 |
| MSTRG. 32369. 3  | 168 | 0. 3127  | 7. 036682129 | 1 |
| MSTRG. 32371. 2  | 395 | 0. 33918 | 9. 189025879 | 1 |

|                  |      |          |              |    |
|------------------|------|----------|--------------|----|
| MSTRG. 32371. 3  | 395  | 0. 36811 | 9. 189025879 | 1  |
| MSTRG. 32359. 2  | 326  | 0. 41974 | 8. 787658691 | 1  |
| MSTRG. 32372. 1  | 465  | 0. 43513 | 5. 881164551 | 1  |
| MSTRG. 32377. 1  | 183  | 0. 36119 | 8. 829772949 | 1  |
| MSTRG. 32381. 7  | 417  | 0. 41151 | 6. 034973145 | 1  |
| MSTRG. 32381. 11 | 1479 | 0. 42505 | 5. 550964355 | 1  |
| MSTRG. 32381. 10 | 1247 | 0. 41531 | 5. 56048584  | 1  |
| MSTRG. 32381. 2  | 1441 | 0. 41217 | 5. 330505371 | 1  |
| MSTRG. 32381. 3  | 1171 | 0. 4294  | 5. 354797363 | 1  |
| MSTRG. 32381. 1  | 1162 | 0. 4294  | 5. 353210449 | 1  |
| MSTRG. 32381. 8  | 1450 | 0. 41217 | 5. 331970215 | 1  |
| MSTRG. 32381. 12 | 1457 | 0. 4135  | 5. 335021973 | 1  |
| MSTRG. 32381. 4  | 1686 | 0. 39255 | 5. 422180176 | 1  |
| MSTRG. 32381. 6  | 810  | 0. 3739  | 5. 428771973 | 1  |
| MSTRG. 32381. 14 | 167  | 0. 30593 | 8. 598449707 | 1  |
| MSTRG. 32378. 1  | 56   | 0. 39797 | 7. 689025879 | 1  |
| MSTRG. 32384. 10 | 456  | 0. 36151 | 9. 158752441 | 1  |
| MSTRG. 32384. 11 | 453  | 0. 41783 | 9. 073425293 | 1  |
| MSTRG. 32384. 5  | 433  | 0. 43323 | 9. 406311035 | 1  |
| MSTRG. 32388. 1  | 482  | 0. 47523 | 6. 691955566 | 1  |
| MSTRG. 32395. 5  | 226  | 0. 3889  | 10. 41217041 | 1  |
| MSTRG. 32395. 2  | 226  | 0. 36099 | 10. 41217041 | 1  |
| MSTRG. 32395. 3  | 226  | 0. 40099 | 10. 41217041 | 1  |
| MSTRG. 32395. 4  | 226  | 0. 36792 | 10. 41217041 | 1  |
| MSTRG. 32395. 7  | 226  | 0. 40426 | 10. 41217041 | 1  |
| MSTRG. 32394. 2  | 79   | 0. 42995 | 11. 93658447 | 1  |
| MSTRG. 32397. 2  | 258  | 0. 41212 | 4. 761291504 | 1  |
| MSTRG. 32397. 3  | 463  | 0. 43399 | 5. 773498535 | 1  |
| MSTRG. 32397. 4  | 451  | 0. 465   | 5. 513000488 | 1  |
| MSTRG. 32397. 5  | 278  | 0. 3417  | 9. 329772949 | 1  |
| MSTRG. 32397. 6  | 290  | 0. 34635 | 9. 447937012 | 1  |
| MSTRG. 32402. 1  | 418  | 0. 424   | 8. 387268066 | 1  |
| MSTRG. 32405. 3  | 76   | 0. 35729 | 8. 094421387 | 1  |
| MSTRG. 32407. 1  | 52   | 0. 37942 | 9. 354553223 | -1 |
| MSTRG. 32411. 2  | 288  | 0. 30415 | 5. 20526123  | 1  |
| MSTRG. 32412. 2  | 390  | 0. 37931 | 5. 821960449 | 1  |
| MSTRG. 32411. 3  | 65   | 0. 29919 | 9. 839294434 | 1  |
| MSTRG. 32411. 4  | 81   | 0. 32022 | 10. 84295654 | 1  |
| MSTRG. 32411. 5  | 65   | 0. 34797 | 9. 839294434 | 1  |
| MSTRG. 32415. 1  | 192  | 0. 3761  | 4. 976257324 | 1  |
| MSTRG. 32416. 3  | 872  | 0. 4388  | 5. 632629395 | 1  |
| MSTRG. 32418. 6  | 1861 | 0. 41139 | 6. 577209473 | -1 |
| MSTRG. 32418. 9  | 1864 | 0. 41139 | 6. 496398926 | -1 |
| MSTRG. 32419. 2  | 1041 | 0. 41668 | 5. 743103027 | 1  |
| MSTRG. 32424. 1  | 267  | 0. 37473 | 9. 018615723 | 1  |
| MSTRG. 32427. 1  | 129  | 0. 36274 | 12. 07440186 | 1  |
| MSTRG. 32434. 2  | 197  | 0. 37416 | 6. 243225098 | 1  |
| MSTRG. 32441. 1  | 115  | 0. 36424 | 6. 339172363 | 1  |
| MSTRG. 32441. 2  | 115  | 0. 38593 | 6. 339172363 | 1  |
| MSTRG. 32441. 3  | 115  | 0. 39192 | 6. 339172363 | 1  |
| MSTRG. 32444. 1  | 87   | 0. 35024 | 10. 71405029 | 1  |
| MSTRG. 32444. 2  | 78   | 0. 40913 | 10. 66558838 | 1  |
| MSTRG. 32456. 3  | 256  | 0. 41851 | 6. 365661621 | 1  |
| MSTRG. 32456. 2  | 256  | 0. 38352 | 6. 365661621 | 1  |

|                  |     |          |              |    |
|------------------|-----|----------|--------------|----|
| MSTRG. 32447. 2  | 150 | 0. 42084 | 9. 371887207 | 1  |
| MSTRG. 32451. 2  | 337 | 0. 44363 | 6. 807678223 | 1  |
| MSTRG. 32457. 1  | 82  | 0. 30464 | 6. 011779785 | 1  |
| MSTRG. 32484. 5  | 362 | 0. 42777 | 6. 60736084  | 1  |
| MSTRG. 32484. 6  | 362 | 0. 37096 | 6. 60736084  | 1  |
| MSTRG. 32484. 1  | 669 | 0. 33996 | 9. 678894043 | 1  |
| MSTRG. 32484. 4  | 362 | 0. 42077 | 6. 60736084  | 1  |
| MSTRG. 32484. 3  | 143 | 0. 40373 | 5. 681091309 | 1  |
| MSTRG. 32484. 2  | 362 | 0. 39218 | 6. 60736084  | 1  |
| MSTRG. 32484. 7  | 551 | 0. 31946 | 9. 787780762 | 1  |
| MSTRG. 32484. 8  | 551 | 0. 27678 | 9. 787780762 | 1  |
| MSTRG. 32484. 9  | 362 | 0. 44413 | 6. 60736084  | 1  |
| MSTRG. 32484. 11 | 143 | 0. 40471 | 5. 681091309 | 1  |
| MSTRG. 32489. 1  | 566 | 0. 44691 | 6. 065612793 | 1  |
| MSTRG. 32489. 2  | 567 | 0. 44691 | 6. 065612793 | 1  |
| MSTRG. 32492. 2  | 930 | 0. 42958 | 7. 127502441 | 1  |
| MSTRG. 32492. 5  | 563 | 0. 45013 | 5. 441467285 | 1  |
| MSTRG. 32494. 1  | 68  | 0. 28486 | 11. 14312744 | 1  |
| MSTRG. 32468. 1  | 765 | 0. 34885 | 6. 871398926 | 1  |
| MSTRG. 32468. 4  | 980 | 0. 35483 | 8. 50213623  | 1  |
| MSTRG. 32468. 5  | 980 | 0. 36931 | 8. 50213623  | 1  |
| MSTRG. 32468. 6  | 126 | 0. 32624 | 7. 902160645 | 1  |
| MSTRG. 32469. 1  | 88  | 0. 30191 | 5. 534118652 | 1  |
| MSTRG. 32474. 2  | 87  | 0. 3588  | 9. 492492676 | 1  |
| MSTRG. 32474. 3  | 32  | 0. 396   | 6. 804992676 | 1  |
| MSTRG. 32480. 1  | 200 | 0. 39509 | 5. 938781738 | 1  |
| MSTRG. 32497. 2  | 127 | 0. 31915 | 9. 513122559 | 1  |
| MSTRG. 32501. 2  | 160 | 0. 37485 | 5. 416442871 | 1  |
| MSTRG. 32501. 3  | 182 | 0. 35123 | 10. 17681885 | 1  |
| MSTRG. 32507. 4  | 335 | 0. 40164 | 5. 695251465 | 1  |
| MSTRG. 32507. 3  | 352 | 0. 34832 | 8. 051574707 | 1  |
| MSTRG. 32507. 6  | 407 | 0. 46578 | 6. 236755371 | 1  |
| MSTRG. 32509. 1  | 883 | 0. 39869 | 8. 894470215 | 1  |
| MSTRG. 32509. 3  | 883 | 0. 42333 | 8. 894470215 | 1  |
| MSTRG. 32513. 1  | 104 | 0. 32626 | 8. 640808105 | 1  |
| MSTRG. 32513. 2  | 92  | 0. 41202 | 10. 44281006 | 1  |
| MSTRG. 32514. 4  | 873 | 0. 40554 | 4. 474182129 | 1  |
| MSTRG. 32514. 5  | 648 | 0. 31208 | 5. 576721191 | 1  |
| MSTRG. 32515. 1  | 111 | 0. 29967 | 9. 330505371 | 1  |
| MSTRG. 32519. 1  | 511 | 0. 34372 | 5. 36541748  | 1  |
| MSTRG. 32519. 3  | 465 | 0. 41958 | 5. 66986084  | -1 |
| MSTRG. 32519. 4  | 478 | 0. 44758 | 5. 75579834  | -1 |
| MSTRG. 32519. 5  | 354 | 0. 31208 | 4. 787414551 | 1  |
| MSTRG. 32519. 6  | 217 | 0. 35948 | 4. 669128418 | 1  |
| MSTRG. 32519. 7  | 349 | 0. 38252 | 4. 987243652 | 1  |
| MSTRG. 32519. 8  | 325 | 0. 37928 | 4. 741149902 | 1  |
| MSTRG. 32519. 9  | 327 | 0. 42143 | 4. 987731934 | 1  |
| MSTRG. 32520. 1  | 57  | 0. 31506 | 8. 282653809 | 1  |
| MSTRG. 32520. 2  | 44  | 0. 30823 | 7. 977844238 | 1  |
| MSTRG. 32520. 3  | 44  | 0. 31341 | 7. 977844238 | 1  |
| MSTRG. 32520. 4  | 44  | 0. 39239 | 7. 977844238 | 1  |
| MSTRG. 32520. 5  | 44  | 0. 36703 | 7. 977844238 | 1  |
| MSTRG. 32523. 3  | 53  | 0. 44157 | 12. 3012085  | 1  |
| MSTRG. 32528. 2  | 101 | 0. 35263 | 6. 719421387 | 1  |

|                  |     |          |              |    |
|------------------|-----|----------|--------------|----|
| MSTRG. 32528. 1  | 120 | 0. 39713 | 9. 931213379 | 1  |
| MSTRG. 32534. 11 | 323 | 0. 33569 | 9. 067077637 | 1  |
| MSTRG. 32534. 10 | 385 | 0. 32231 | 8. 779724121 | 1  |
| MSTRG. 32534. 3  | 367 | 0. 29456 | 9. 255432129 | 1  |
| MSTRG. 32534. 4  | 383 | 0. 27379 | 9. 206115723 | 1  |
| MSTRG. 32534. 6  | 350 | 0. 27379 | 8. 746643066 | 1  |
| MSTRG. 32534. 7  | 383 | 0. 29456 | 9. 206115723 | 1  |
| MSTRG. 32534. 13 | 316 | 0. 45417 | 8. 452453613 | 1  |
| MSTRG. 32534. 5  | 847 | 0. 43059 | 8. 885681152 | 1  |
| MSTRG. 32534. 12 | 843 | 0. 42517 | 8. 88873291  | 1  |
| MSTRG. 32534. 8  | 843 | 0. 45182 | 8. 88873291  | 1  |
| MSTRG. 32542. 1  | 116 | 0. 38198 | 5. 829650879 | 1  |
| MSTRG. 32542. 3  | 109 | 0. 37496 | 5. 820251465 | 1  |
| MSTRG. 32545. 1  | 106 | 0. 2535  | 10. 6293335  | 1  |
| MSTRG. 32546. 2  | 241 | 0. 34599 | 8. 895446777 | 1  |
| MSTRG. 32547. 4  | 501 | 0. 43251 | 5. 132507324 | 1  |
| MSTRG. 32547. 5  | 501 | 0. 41069 | 5. 132507324 | 1  |
| MSTRG. 32547. 6  | 464 | 0. 4266  | 5. 111877441 | 1  |
| MSTRG. 32549. 1  | 190 | 0. 27089 | 11. 28411865 | 1  |
| MSTRG. 32549. 2  | 179 | 0. 27739 | 11. 19207764 | 1  |
| MSTRG. 32549. 3  | 143 | 0. 27739 | 10. 74957275 | 1  |
| MSTRG. 32550. 1  | 42  | 0. 36867 | 5. 446472168 | 1  |
| MSTRG. 32552. 1  | 171 | 0. 37256 | 9. 733215332 | -1 |
| MSTRG. 32554. 2  | 70  | 0. 41516 | 7. 999694824 | -1 |
| MSTRG. 32554. 1  | 101 | 0. 34274 | 6. 392272949 | 1  |
| MSTRG. 32554. 3  | 279 | 0. 39866 | 10. 34234619 | 1  |
| MSTRG. 32538. 2  | 40  | 0. 42835 | 6. 011291504 | 1  |
| MSTRG. 32538. 4  | 31  | 0. 41754 | 6. 011535645 | 1  |
| MSTRG. 32538. 5  | 363 | 0. 45565 | 5. 429870605 | 1  |
| MSTRG. 32541. 1  | 475 | 0. 39059 | 8. 733825684 | 1  |
| MSTRG. 32541. 4  | 475 | 0. 39514 | 8. 733825684 | 1  |
| MSTRG. 32557. 1  | 96  | 0. 40282 | 9. 692565918 | 1  |
| MSTRG. 32558. 1  | 873 | 0. 42214 | 6. 655700684 | 1  |
| MSTRG. 32558. 2  | 865 | 0. 42214 | 6. 497375488 | 1  |
| MSTRG. 32561. 2  | 684 | 0. 48064 | 5. 892028809 | 1  |
| MSTRG. 32561. 3  | 684 | 0. 42592 | 5. 892028809 | 1  |
| MSTRG. 32561. 4  | 630 | 0. 45826 | 5. 758728027 | 1  |
| MSTRG. 32561. 5  | 629 | 0. 43905 | 5. 858825684 | 1  |
| MSTRG. 32564. 1  | 174 | 0. 28002 | 9. 127258301 | 1  |
| MSTRG. 32564. 2  | 174 | 0. 28338 | 9. 127258301 | 1  |
| MSTRG. 32562. 1  | 161 | 0. 3886  | 10. 35321045 | 1  |
| MSTRG. 32566. 3  | 252 | 0. 27415 | 9. 703918457 | 1  |
| MSTRG. 32566. 4  | 174 | 0. 28796 | 11. 02215576 | 1  |
| MSTRG. 32566. 5  | 190 | 0. 27385 | 9. 096618652 | 1  |
| MSTRG. 32568. 3  | 325 | 0. 42389 | 5. 304992676 | 1  |
| MSTRG. 32575. 3  | 235 | 0. 30184 | 8. 960998535 | 1  |
| MSTRG. 32575. 4  | 235 | 0. 35973 | 8. 960998535 | 1  |
| MSTRG. 32575. 5  | 235 | 0. 41378 | 8. 960998535 | 1  |
| MSTRG. 32575. 6  | 111 | 0. 30673 | 9. 750305176 | 1  |
| MSTRG. 32575. 8  | 179 | 0. 31798 | 9. 109802246 | 1  |
| MSTRG. 32575. 10 | 217 | 0. 35085 | 8. 822692871 | 1  |
| MSTRG. 32575. 9  | 217 | 0. 32261 | 8. 822692871 | 1  |
| MSTRG. 32575. 11 | 179 | 0. 36309 | 9. 109802246 | 1  |
| MSTRG. 32575. 12 | 179 | 0. 33901 | 9. 109802246 | 1  |

|                 |      |          |              |    |
|-----------------|------|----------|--------------|----|
| MSTRG. 32574. 3 | 108  | 0. 35221 | 10. 17181396 | 1  |
| MSTRG. 32576. 2 | 188  | 0. 37385 | 9. 437194824 | 1  |
| MSTRG. 32582. 1 | 144  | 0. 41912 | 6. 140075684 | 1  |
| MSTRG. 32588. 3 | 561  | 0. 46309 | 5. 227111816 | 1  |
| MSTRG. 32592. 1 | 238  | 0. 34654 | 6. 674621582 | 1  |
| MSTRG. 32592. 3 | 238  | 0. 37414 | 6. 674621582 | 1  |
| MSTRG. 32596. 2 | 486  | 0. 4086  | 6. 827331543 | 1  |
| MSTRG. 32598. 2 | 104  | 0. 32844 | 11. 94610596 | 1  |
| MSTRG. 32606. 2 | 534  | 0. 38728 | 9. 112854004 | 1  |
| MSTRG. 32606. 4 | 703  | 0. 4006  | 7. 070251465 | 1  |
| MSTRG. 32606. 3 | 713  | 0. 40648 | 7. 065246582 | 1  |
| MSTRG. 32607. 2 | 123  | 0. 38941 | 4. 96673584  | 1  |
| MSTRG. 32607. 3 | 140  | 0. 41384 | 5. 048034668 | 1  |
| MSTRG. 32604. 3 | 1080 | 0. 37828 | 9. 427307129 | 1  |
| MSTRG. 32609. 2 | 708  | 0. 45713 | 7. 327941895 | 1  |
| MSTRG. 32611. 1 | 170  | 0. 40914 | 4. 947814941 | 1  |
| MSTRG. 32613. 1 | 134  | 0. 30594 | 9. 495788574 | 1  |
| MSTRG. 32614. 1 | 399  | 0. 38423 | 4. 59161377  | 1  |
| MSTRG. 32614. 2 | 456  | 0. 39668 | 4. 637756348 | 1  |
| MSTRG. 32614. 3 | 399  | 0. 43474 | 4. 59161377  | 1  |
| MSTRG. 32614. 4 | 456  | 0. 42114 | 4. 637756348 | 1  |
| MSTRG. 32614. 5 | 399  | 0. 39524 | 4. 59161377  | 1  |
| MSTRG. 32614. 6 | 399  | 0. 39524 | 4. 59161377  | 1  |
| MSTRG. 32617. 1 | 146  | 0. 4306  | 6. 38494873  | 1  |
| MSTRG. 32619. 2 | 124  | 0. 42255 | 7. 76751709  | 1  |
| MSTRG. 32621. 1 | 80   | 0. 41831 | 9. 443664551 | 1  |
| MSTRG. 32628. 1 | 443  | 0. 42502 | 8. 054626465 | -1 |
| MSTRG. 32628. 2 | 31   | 0. 4587  | 12. 00848389 | 1  |
| MSTRG. 32640. 1 | 759  | 0. 3463  | 6. 814880371 | 1  |
| MSTRG. 32641. 1 | 1685 | 0. 44546 | 9. 178649902 | 1  |
| MSTRG. 32641. 2 | 1683 | 0. 41828 | 9. 178649902 | 1  |
| MSTRG. 32641. 3 | 1635 | 0. 41828 | 9. 051452637 | 1  |
| MSTRG. 32641. 4 | 1630 | 0. 37087 | 9. 053405762 | 1  |
| MSTRG. 32634. 1 | 521  | 0. 35655 | 9. 067565918 | 1  |
| MSTRG. 32634. 2 | 917  | 0. 38635 | 9. 247497559 | 1  |
| MSTRG. 32646. 2 | 45   | 0. 41273 | 12. 40863037 | 1  |
| MSTRG. 32646. 3 | 51   | 0. 40798 | 12. 55194092 | 1  |
| MSTRG. 32658. 1 | 173  | 0. 37446 | 4. 73614502  | 1  |
| MSTRG. 32658. 2 | 308  | 0. 4324  | 5. 256408691 | 1  |
| MSTRG. 32658. 4 | 70   | 0. 35542 | 12. 47845459 | 1  |
| MSTRG. 32658. 3 | 308  | 0. 45364 | 5. 559753418 | 1  |
| MSTRG. 32660. 1 | 74   | 0. 34927 | 5. 496154785 | -1 |
| MSTRG. 32661. 2 | 715  | 0. 26767 | 8. 199890137 | 1  |
| MSTRG. 32662. 1 | 96   | 0. 46854 | 11. 04364014 | -1 |
| MSTRG. 32663. 1 | 308  | 0. 44781 | 5. 331848145 | 1  |
| MSTRG. 32664. 1 | 75   | 0. 31425 | 10. 22357178 | 1  |
| MSTRG. 32665. 1 | 61   | 0. 35309 | 6. 692321777 | 1  |
| MSTRG. 32666. 2 | 290  | 0. 43123 | 9. 512756348 | -1 |
| MSTRG. 32656. 1 | 407  | 0. 32244 | 5. 697570801 | 1  |
| MSTRG. 32656. 3 | 406  | 0. 39704 | 6. 104797363 | 1  |
| MSTRG. 32668. 5 | 918  | 0. 43632 | 6. 823303223 | 1  |
| MSTRG. 32668. 6 | 918  | 0. 46756 | 6. 823303223 | 1  |
| MSTRG. 32674. 2 | 274  | 0. 40942 | 4. 508728027 | 1  |
| MSTRG. 32672. 1 | 82   | 0. 29695 | 9. 828552246 | 1  |

|                  |      |          |              |    |
|------------------|------|----------|--------------|----|
| MSTRG. 32681. 3  | 1446 | 0. 4437  | 8. 344665527 | 1  |
| MSTRG. 32683. 1  | 91   | 0. 28165 | 9. 482727051 | 1  |
| MSTRG. 32682. 3  | 445  | 0. 31204 | 5. 900939941 | 1  |
| MSTRG. 32682. 4  | 297  | 0. 27517 | 6. 503234863 | 1  |
| MSTRG. 32686. 1  | 1231 | 0. 45973 | 5. 26776123  | 1  |
| MSTRG. 32686. 3  | 1231 | 0. 46461 | 5. 26776123  | 1  |
| MSTRG. 32687. 1  | 101  | 0. 27661 | 5. 444641113 | 1  |
| MSTRG. 32688. 1  | 216  | 0. 3609  | 10. 15081787 | 1  |
| MSTRG. 32689. 1  | 110  | 0. 3279  | 8. 215637207 | 1  |
| MSTRG. 32690. 1  | 732  | 0. 33102 | 5. 976013184 | 1  |
| MSTRG. 32691. 1  | 175  | 0. 43216 | 5. 281555176 | 1  |
| MSTRG. 32692. 1  | 132  | 0. 44549 | 5. 79119873  | 1  |
| MSTRG. 32697. 1  | 28   | 0. 37444 | 11. 69903564 | -1 |
| MSTRG. 32698. 1  | 56   | 0. 33953 | 7. 961364746 | 1  |
| MSTRG. 32699. 1  | 504  | 0. 43882 | 9. 546447754 | 1  |
| MSTRG. 32699. 2  | 499  | 0. 42291 | 9. 504089355 | 1  |
| MSTRG. 32699. 3  | 499  | 0. 42291 | 9. 504089355 | 1  |
| MSTRG. 32699. 4  | 468  | 0. 41113 | 9. 584533691 | -1 |
| MSTRG. 32699. 5  | 473  | 0. 40618 | 9. 390075684 | -1 |
| MSTRG. 32709. 11 | 30   | 0. 32233 | 6. 502746582 | 1  |
| MSTRG. 32712. 1  | 1105 | 0. 38046 | 8. 600402832 | 1  |
| MSTRG. 32719. 2  | 662  | 0. 40374 | 5. 457458496 | 1  |
| MSTRG. 32720. 1  | 151  | 0. 27327 | 6. 949401855 | 1  |
| MSTRG. 32718. 2  | 91   | 0. 3937  | 9. 327209473 | 1  |
| MSTRG. 32723. 2  | 674  | 0. 37814 | 8. 458679199 | 1  |
| MSTRG. 32723. 3  | 728  | 0. 37814 | 8. 425231934 | 1  |
| MSTRG. 32723. 10 | 674  | 0. 39354 | 8. 458679199 | 1  |
| MSTRG. 32723. 8  | 649  | 0. 3963  | 8. 629333496 | 1  |
| MSTRG. 32723. 7  | 703  | 0. 40002 | 8. 59185791  | 1  |
| MSTRG. 32723. 11 | 663  | 0. 37442 | 8. 526428223 | 1  |
| MSTRG. 32723. 9  | 663  | 0. 37442 | 8. 526428223 | 1  |
| MSTRG. 32723. 12 | 728  | 0. 39354 | 8. 425231934 | 1  |
| MSTRG. 32723. 14 | 728  | 0. 39354 | 8. 425231934 | 1  |
| MSTRG. 32723. 16 | 728  | 0. 39354 | 8. 425231934 | 1  |
| MSTRG. 32723. 13 | 155  | 0. 38902 | 4. 824645996 | 1  |
| MSTRG. 32723. 15 | 649  | 0. 39878 | 8. 629333496 | 1  |
| MSTRG. 32723. 17 | 674  | 0. 42437 | 8. 458679199 | 1  |
| MSTRG. 32723. 18 | 628  | 0. 38728 | 8. 313659668 | 1  |
| MSTRG. 32721. 5  | 181  | 0. 31497 | 9. 551086426 | 1  |
| MSTRG. 32721. 6  | 181  | 0. 31345 | 9. 551086426 | 1  |
| MSTRG. 32730. 1  | 654  | 0. 4455  | 8. 854797363 | -1 |
| MSTRG. 32731. 1  | 15   | 0. 36116 | 6. 491394043 | -1 |
| MSTRG. 32732. 1  | 105  | 0. 38784 | 10. 28106689 | -1 |
| MSTRG. 32730. 3  | 340  | 0. 39008 | 9. 201965332 | 1  |
| MSTRG. 32738. 1  | 500  | 0. 43895 | 9. 18548584  | 1  |
| MSTRG. 32738. 2  | 500  | 0. 44839 | 9. 18548584  | 1  |
| MSTRG. 32738. 4  | 1076 | 0. 43751 | 4. 195495605 | 1  |
| MSTRG. 32738. 5  | 500  | 0. 44086 | 9. 18548584  | 1  |
| MSTRG. 32738. 6  | 500  | 0. 44086 | 9. 18548584  | 1  |
| MSTRG. 32738. 7  | 500  | 0. 33219 | 9. 18548584  | 1  |
| MSTRG. 32739. 1  | 1337 | 0. 441   | 5. 681335449 | 1  |
| MSTRG. 32740. 1  | 58   | 0. 30553 | 4. 460388184 | 1  |
| MSTRG. 32747. 4  | 263  | 0. 31204 | 9. 070251465 | 1  |
| MSTRG. 32747. 9  | 251  | 0. 4372  | 9. 140197754 | 1  |



|                  |     |          |              |    |
|------------------|-----|----------|--------------|----|
| MSTRG. 32749. 1  | 67  | 0. 24856 | 9. 773132324 | -1 |
| MSTRG. 32751. 3  | 896 | 0. 43741 | 8. 694641113 | 1  |
| MSTRG. 32751. 2  | 896 | 0. 42673 | 8. 694641113 | 1  |
| MSTRG. 32752. 1  | 43  | 0. 41212 | 4. 033508301 | 1  |
| MSTRG. 32749. 2  | 37  | 0. 39243 | 5. 362121582 | -1 |
| MSTRG. 32752. 2  | 225 | 0. 47481 | 8. 977600098 | 1  |
| MSTRG. 32752. 4  | 225 | 0. 47543 | 8. 977600098 | 1  |
| MSTRG. 32752. 5  | 134 | 0. 47654 | 8. 608337402 | 1  |
| MSTRG. 32752. 6  | 134 | 0. 47654 | 8. 608337402 | 1  |
| MSTRG. 32752. 7  | 134 | 0. 46336 | 8. 591125488 | 1  |
| MSTRG. 32752. 8  | 82  | 0. 42659 | 9. 625549316 | 1  |
| MSTRG. 32752. 9  | 96  | 0. 47239 | 10. 22735596 | 1  |
| MSTRG. 32754. 1  | 94  | 0. 33285 | 9. 571105957 | 1  |
| MSTRG. 32754. 2  | 82  | 0. 39606 | 8. 52130127  | 1  |
| MSTRG. 32754. 3  | 82  | 0. 43536 | 8. 52130127  | 1  |
| MSTRG. 32755. 1  | 42  | 0. 38238 | 7. 807312012 | 1  |
| MSTRG. 32754. 4  | 34  | 0. 35689 | 7. 794372559 | -1 |
| MSTRG. 32756. 1  | 63  | 0. 421   | 5. 968933105 | 1  |
| MSTRG. 32757. 1  | 183 | 0. 38433 | 11. 17706299 | 1  |
| MSTRG. 32760. 1  | 102 | 0. 4578  | 10. 84088135 | -1 |
| MSTRG. 32765. 1  | 82  | 0. 32237 | 10. 83416748 | 1  |
| MSTRG. 32773. 1  | 298 | 0. 2895  | 9. 675842285 | 1  |
| MSTRG. 32767. 1  | 245 | 0. 40889 | 6. 319885254 | 1  |
| MSTRG. 32781. 1  | 97  | 0. 41398 | 5. 799499512 | 1  |
| MSTRG. 32782. 1  | 113 | 0. 38449 | 5. 390686035 | 1  |
| MSTRG. 32796. 3  | 51  | 0. 31402 | 10. 25604248 | -1 |
| MSTRG. 32796. 5  | 51  | 0. 31402 | 10. 25604248 | -1 |
| MSTRG. 32796. 4  | 90  | 0. 37104 | 11. 64190674 | 1  |
| MSTRG. 32796. 6  | 145 | 0. 28675 | 11. 01409912 | 1  |
| MSTRG. 32796. 7  | 521 | 0. 34813 | 8. 484558105 | 1  |
| MSTRG. 32796. 9  | 296 | 0. 37738 | 5. 338806152 | 1  |
| MSTRG. 32796. 10 | 521 | 0. 34538 | 8. 484558105 | 1  |
| MSTRG. 32796. 8  | 521 | 0. 34538 | 8. 484558105 | 1  |
| MSTRG. 32796. 11 | 521 | 0. 35681 | 8. 484558105 | 1  |
| MSTRG. 32796. 12 | 713 | 0. 39117 | 7. 571350098 | 1  |
| MSTRG. 32796. 14 | 10  | 0. 25515 | 12. 30108643 | 1  |
| MSTRG. 32796. 13 | 521 | 0. 37571 | 8. 484558105 | 1  |
| MSTRG. 32796. 15 | 296 | 0. 38681 | 5. 338806152 | 1  |
| MSTRG. 32796. 16 | 296 | 0. 36885 | 5. 338806152 | 1  |
| MSTRG. 32796. 17 | 296 | 0. 38681 | 5. 338806152 | 1  |
| MSTRG. 32796. 18 | 521 | 0. 36238 | 8. 73626709  | 1  |
| MSTRG. 32796. 19 | 521 | 0. 38235 | 8. 636413574 | 1  |
| MSTRG. 32796. 20 | 521 | 0. 39621 | 8. 636413574 | 1  |
| MSTRG. 32798. 3  | 350 | 0. 3869  | 5. 325622559 | 1  |
| MSTRG. 32798. 4  | 360 | 0. 4386  | 5. 372619629 | 1  |
| MSTRG. 32798. 5  | 350 | 0. 38502 | 5. 325622559 | 1  |
| MSTRG. 32798. 2  | 360 | 0. 41782 | 5. 312805176 | 1  |
| MSTRG. 32798. 6  | 360 | 0. 4162  | 5. 239562988 | 1  |
| MSTRG. 32798. 8  | 360 | 0. 33887 | 5. 312805176 | 1  |
| MSTRG. 32789. 1  | 416 | 0. 37705 | 9. 21295166  | 1  |
| MSTRG. 32792. 1  | 38  | 0. 42075 | 5. 207336426 | -1 |
| MSTRG. 32801. 1  | 941 | 0. 43606 | 5. 764221191 | 1  |
| MSTRG. 32801. 3  | 955 | 0. 43525 | 5. 641540527 | 1  |
| MSTRG. 32801. 4  | 707 | 0. 45082 | 5. 396789551 | 1  |

|                 |      |          |              |    |
|-----------------|------|----------|--------------|----|
| MSTRG. 32802. 1 | 43   | 0. 45198 | 9. 519104004 | 1  |
| MSTRG. 32814. 2 | 737  | 0. 38558 | 6. 02532959  | 1  |
| MSTRG. 32815. 1 | 39   | 0. 36957 | 8. 736877441 | -1 |
| MSTRG. 32821. 1 | 859  | 0. 39432 | 6. 047546387 | 1  |
| MSTRG. 32821. 2 | 859  | 0. 4208  | 6. 047546387 | 1  |
| MSTRG. 32821. 3 | 859  | 0. 42264 | 6. 047546387 | 1  |
| MSTRG. 32821. 4 | 859  | 0. 44431 | 6. 047546387 | 1  |
| MSTRG. 32821. 5 | 859  | 0. 44431 | 6. 047546387 | 1  |
| MSTRG. 32819. 1 | 55   | 0. 34369 | 9. 303894043 | -1 |
| MSTRG. 32820. 2 | 225  | 0. 3543  | 11. 27642822 | -1 |
| MSTRG. 32827. 1 | 131  | 0. 43035 | 5. 944763184 | 1  |
| MSTRG. 32828. 1 | 95   | 0. 42324 | 9. 696105957 | 1  |
| MSTRG. 32832. 1 | 17   | 0. 36158 | 5. 927185059 | -1 |
| MSTRG. 32832. 2 | 88   | 0. 4015  | 5. 79864502  | -1 |
| MSTRG. 32836. 1 | 607  | 0. 36837 | 8. 584533691 | 1  |
| MSTRG. 32837. 1 | 54   | 0. 45993 | 11. 00860596 | -1 |
| MSTRG. 32841. 1 | 104  | 0. 34908 | 6. 487487793 | 1  |
| MSTRG. 32842. 7 | 110  | 0. 40879 | 12. 56878662 | 1  |
| MSTRG. 32842. 8 | 110  | 0. 40879 | 12. 56878662 | 1  |
| MSTRG. 32842. 6 | 110  | 0. 41203 | 12. 56878662 | 1  |
| MSTRG. 32842. 2 | 110  | 0. 42589 | 12. 56878662 | 1  |
| MSTRG. 32839. 1 | 34   | 0. 40712 | 4. 628479004 | 1  |
| MSTRG. 32839. 2 | 34   | 0. 43638 | 4. 895812988 | 1  |
| MSTRG. 32839. 3 | 34   | 0. 45867 | 4. 895812988 | 1  |
| MSTRG. 32840. 1 | 83   | 0. 40768 | 8. 504943848 | 1  |
| MSTRG. 32849. 1 | 68   | 0. 30894 | 6. 228210449 | 1  |
| MSTRG. 32859. 1 | 47   | 0. 38601 | 5. 098327637 | 1  |
| MSTRG. 32860. 1 | 153  | 0. 29367 | 11. 19415283 | 1  |
| MSTRG. 32862. 1 | 136  | 0. 27218 | 9. 50604248  | 1  |
| MSTRG. 32859. 2 | 70   | 0. 30277 | 9. 625915527 | 1  |
| MSTRG. 32855. 1 | 42   | 0. 43444 | 4. 027648926 | 1  |
| MSTRG. 32866. 1 | 60   | 0. 28958 | 4. 295837402 | -1 |
| MSTRG. 32867. 1 | 63   | 0. 32762 | 8. 293395996 | 1  |
| MSTRG. 32867. 2 | 100  | 0. 30191 | 5. 396057129 | 1  |
| MSTRG. 32867. 3 | 73   | 0. 28518 | 9. 132019043 | 1  |
| MSTRG. 32867. 4 | 189  | 0. 32697 | 9. 676330566 | 1  |
| MSTRG. 32867. 5 | 144  | 0. 2921  | 9. 590393066 | 1  |
| MSTRG. 32867. 6 | 100  | 0. 31048 | 10. 39251709 | 1  |
| MSTRG. 32867. 7 | 144  | 0. 2921  | 9. 590393066 | 1  |
| MSTRG. 32863. 5 | 550  | 0. 45485 | 7. 265686035 | 1  |
| MSTRG. 32863. 6 | 562  | 0. 41834 | 6. 764465332 | 1  |
| MSTRG. 32864. 2 | 281  | 0. 34054 | 9. 98223877  | 1  |
| MSTRG. 32874. 3 | 1295 | 0. 39173 | 8. 61895752  | 1  |
| MSTRG. 32874. 5 | 1219 | 0. 34944 | 8. 994934082 | 1  |
| MSTRG. 32874. 6 | 372  | 0. 3852  | 5. 135070801 | 1  |
| MSTRG. 32876. 1 | 189  | 0. 30869 | 10. 01495361 | 1  |
| MSTRG. 32877. 1 | 211  | 0. 29367 | 9. 625793457 | 1  |
| MSTRG. 32869. 1 | 147  | 0. 45503 | 9. 799621582 | 1  |
| MSTRG. 32880. 1 | 36   | 0. 46264 | 4. 43572998  | -1 |
| MSTRG. 32884. 1 | 99   | 0. 45077 | 10. 02276611 | 1  |
| MSTRG. 32888. 1 | 90   | 0. 3676  | 9. 000061035 | 1  |
| MSTRG. 32889. 4 | 176  | 0. 27075 | 9. 817321777 | 1  |
| MSTRG. 32889. 3 | 1025 | 0. 40898 | 7. 415588379 | 1  |
| MSTRG. 32889. 6 | 176  | 0. 29527 | 9. 817321777 | 1  |

|                 |      |          |              |    |
|-----------------|------|----------|--------------|----|
| MSTRG. 32889. 5 | 727  | 0. 36933 | 6. 869812012 | 1  |
| MSTRG. 32889. 7 | 727  | 0. 34898 | 6. 869812012 | 1  |
| MSTRG. 32889. 8 | 685  | 0. 34898 | 6. 786437988 | 1  |
| MSTRG. 32889. 9 | 176  | 0. 29709 | 9. 817321777 | 1  |
| MSTRG. 32892. 1 | 620  | 0. 37713 | 8. 944885254 | 1  |
| MSTRG. 32892. 5 | 155  | 0. 30325 | 9. 963684082 | 1  |
| MSTRG. 32893. 4 | 593  | 0. 31289 | 6. 335510254 | 1  |
| MSTRG. 32895. 3 | 620  | 0. 46451 | 4. 678405762 | 1  |
| MSTRG. 32897. 1 | 52   | 0. 36735 | 7. 698425293 | 1  |
| MSTRG. 32899. 1 | 66   | 0. 33552 | 5. 160339355 | 1  |
| MSTRG. 32906. 3 | 369  | 0. 39085 | 4. 378845215 | 1  |
| MSTRG. 32906. 4 | 369  | 0. 43456 | 4. 378845215 | 1  |
| MSTRG. 32906. 6 | 369  | 0. 38886 | 4. 378845215 | 1  |
| MSTRG. 32906. 5 | 369  | 0. 43294 | 4. 378845215 | 1  |
| MSTRG. 32907. 1 | 56   | 0. 40358 | 3. 71661377  | -1 |
| MSTRG. 32916. 1 | 163  | 0. 40758 | 8. 97479248  | 1  |
| MSTRG. 32921. 1 | 64   | 0. 40021 | 9. 812927246 | 1  |
| MSTRG. 32922. 2 | 587  | 0. 46544 | 7. 602355957 | 1  |
| MSTRG. 32922. 4 | 513  | 0. 47867 | 8. 280944824 | 1  |
| MSTRG. 32925. 1 | 68   | 0. 3592  | 8. 118835449 | 1  |
| MSTRG. 32925. 2 | 85   | 0. 34959 | 8. 625793457 | 1  |
| MSTRG. 32927. 1 | 160  | 0. 29526 | 8. 490661621 | 1  |
| MSTRG. 32929. 1 | 527  | 0. 48875 | 8. 938049316 | 1  |
| MSTRG. 32930. 2 | 507  | 0. 45749 | 9. 636779785 | 1  |
| MSTRG. 32933. 1 | 286  | 0. 45245 | 6. 447692871 | 1  |
| MSTRG. 32936. 6 | 92   | 0. 2785  | 9. 379699707 | 1  |
| MSTRG. 32936. 7 | 91   | 0. 28218 | 5. 066223145 | 1  |
| MSTRG. 32936. 8 | 91   | 0. 27943 | 5. 066223145 | 1  |
| MSTRG. 32936. 9 | 91   | 0. 27943 | 5. 066223145 | 1  |
| MSTRG. 32934. 2 | 818  | 0. 44001 | 4. 268859863 | 1  |
| MSTRG. 32934. 3 | 798  | 0. 46417 | 4. 224914551 | 1  |
| MSTRG. 32934. 4 | 868  | 0. 43933 | 4. 162658691 | 1  |
| MSTRG. 32934. 5 | 850  | 0. 46754 | 4. 181335449 | 1  |
| MSTRG. 32935. 1 | 452  | 0. 32274 | 9. 164611816 | 1  |
| MSTRG. 32937. 2 | 366  | 0. 38495 | 4. 98223877  | 1  |
| MSTRG. 32939. 2 | 628  | 0. 43966 | 5. 684631348 | 1  |
| MSTRG. 32943. 1 | 61   | 0. 3466  | 4. 08404541  | 1  |
| MSTRG. 32945. 2 | 264  | 0. 45095 | 9. 02947998  | 1  |
| MSTRG. 32946. 1 | 185  | 0. 44467 | 5. 49822998  | 1  |
| MSTRG. 32951. 4 | 2005 | 0. 46793 | 7. 315368652 | 1  |
| MSTRG. 32953. 1 | 596  | 0. 46901 | 5. 704528809 | 1  |
| MSTRG. 32957. 5 | 2647 | 0. 41757 | 5. 737121582 | 1  |
| MSTRG. 32957. 3 | 2647 | 0. 42252 | 5. 737121582 | 1  |
| MSTRG. 32954. 2 | 172  | 0. 33526 | 9. 83416748  | 1  |
| MSTRG. 32961. 2 | 425  | 0. 43867 | 5. 251647949 | 1  |
| MSTRG. 32964. 1 | 844  | 0. 40152 | 7. 085510254 | -1 |
| MSTRG. 32968. 2 | 477  | 0. 45318 | 8. 791809082 | 1  |
| MSTRG. 32984. 2 | 198  | 0. 33642 | 6. 430236816 | 1  |
| MSTRG. 32984. 4 | 198  | 0. 44393 | 6. 430236816 | 1  |
| MSTRG. 32984. 3 | 198  | 0. 46511 | 6. 430236816 | 1  |
| MSTRG. 32984. 5 | 198  | 0. 33642 | 6. 430236816 | 1  |
| MSTRG. 32981. 1 | 331  | 0. 38265 | 8. 343688965 | 1  |
| MSTRG. 32988. 1 | 63   | 0. 35772 | 8. 841003418 | 1  |
| MSTRG. 32992. 1 | 17   | 0. 40294 | 6. 693054199 | 1  |

|                |      |         |             |    |
|----------------|------|---------|-------------|----|
| MSTRG. 33013.3 | 1038 | 0.46029 | 4.989196777 | 1  |
| MSTRG. 33013.4 | 1011 | 0.47647 | 4.925109863 | 1  |
| MSTRG. 33014.1 | 149  | 0.27289 | 7.663879395 | 1  |
| MSTRG. 33018.1 | 150  | 0.26969 | 10.54095459 | 1  |
| MSTRG. 33003.1 | 43   | 0.43802 | 9.382995605 | 1  |
| MSTRG. 33021.1 | 1101 | 0.40512 | 6.336608887 | 1  |
| MSTRG. 33021.2 | 1095 | 0.45751 | 6.046813965 | -1 |
| MSTRG. 33021.3 | 981  | 0.40029 | 6.223449707 | 1  |
| MSTRG. 33023.1 | 95   | 0.31675 | 9.925964355 | 1  |
| MSTRG. 33024.1 | 84   | 0.39522 | 9.512878418 | 1  |
| MSTRG. 33025.1 | 84   | 0.30387 | 9.793029785 | 1  |
| MSTRG. 33031.5 | 245  | 0.44706 | 7.951965332 | 1  |
| MSTRG. 33031.6 | 245  | 0.47221 | 7.951965332 | 1  |
| MSTRG. 33033.2 | 510  | 0.3924  | 8.746398926 | 1  |
| MSTRG. 33036.1 | 80   | 0.29835 | 9.182678223 | 1  |
| MSTRG. 33036.3 | 112  | 0.3     | 8.01751709  | 1  |
| MSTRG. 33050.3 | 44   | 0.34862 | 4.830871582 | 1  |
| MSTRG. 33050.2 | 57   | 0.30391 | 8.739196777 | 1  |
| MSTRG. 33050.5 | 44   | 0.33857 | 4.830871582 | 1  |
| MSTRG. 33054.1 | 67   | 0.28723 | 4.636169434 | 1  |
| MSTRG. 33056.1 | 434  | 0.37179 | 5.60736084  | 1  |
| MSTRG. 33063.2 | 367  | 0.43561 | 5.801086426 | 1  |
| MSTRG. 33063.3 | 385  | 0.40536 | 5.981384277 | 1  |
| MSTRG. 33068.1 | 254  | 0.41602 | 3.991027832 | 1  |
| MSTRG. 33069.1 | 416  | 0.38997 | 4.196472168 | 1  |
| MSTRG. 33083.6 | 287  | 0.42258 | 9.750183105 | 1  |
| MSTRG. 33088.1 | 306  | 0.29551 | 9.729553223 | 1  |
| MSTRG. 33090.2 | 295  | 0.27517 | 4.80267334  | 1  |
| MSTRG. 33090.3 | 64   | 0.26498 | 7.928771973 | 1  |
| MSTRG. 33097.2 | 403  | 0.39925 | 5.771057129 | 1  |
| MSTRG. 33101.1 | 1577 | 0.46083 | 5.85369873  | 1  |
| MSTRG. 33102.5 | 694  | 0.43873 | 4.896179199 | 1  |
| MSTRG. 33102.4 | 694  | 0.40277 | 4.896179199 | 1  |
| MSTRG. 33102.6 | 694  | 0.41922 | 4.896179199 | 1  |
| MSTRG. 33114.1 | 856  | 0.42822 | 9.09588623  | 1  |
| MSTRG. 33114.2 | 856  | 0.42822 | 9.09588623  | 1  |
| MSTRG. 33114.3 | 216  | 0.45014 | 7.63494873  | 1  |
| MSTRG. 33114.4 | 856  | 0.47126 | 9.09588623  | 1  |
| MSTRG. 33114.5 | 855  | 0.47126 | 9.078674316 | 1  |
| MSTRG. 33114.6 | 856  | 0.47126 | 9.09588623  | 1  |
| MSTRG. 33114.7 | 822  | 0.42481 | 9.06427002  | 1  |
| MSTRG. 33114.8 | 631  | 0.41778 | 9.304748535 | 1  |
| MSTRG. 33114.9 | 630  | 0.39523 | 9.283874512 | 1  |
| MSTRG. 33109.1 | 42   | 0.40557 | 7.799743652 | 1  |
| MSTRG. 33108.3 | 144  | 0.28467 | 9.772277832 | 1  |
| MSTRG. 33120.2 | 334  | 0.43698 | 8.657409668 | 1  |
| MSTRG. 33124.3 | 75   | 0.36978 | 9.374328613 | 1  |
| MSTRG. 33124.1 | 259  | 0.46742 | 4.519958496 | 1  |
| MSTRG. 33127.4 | 77   | 0.36396 | 4.653137207 | 1  |
| MSTRG. 33127.5 | 200  | 0.39877 | 4.777893066 | 1  |
| MSTRG. 33128.1 | 685  | 0.36405 | 6.62713623  | 1  |
| MSTRG. 33131.1 | 71   | 0.32229 | 6.696960449 | 1  |
| MSTRG. 33132.1 | 111  | 0.31526 | 7.597106934 | 1  |
| MSTRG. 33131.2 | 71   | 0.32153 | 6.696960449 | 1  |

|                 |      |          |              |    |
|-----------------|------|----------|--------------|----|
| MSTRG. 33131. 4 | 383  | 0. 40908 | 5. 238952637 | 1  |
| MSTRG. 33133. 1 | 103  | 0. 31603 | 7. 930480957 | 1  |
| MSTRG. 33129. 2 | 342  | 0. 45412 | 4. 995544434 | 1  |
| MSTRG. 33135. 1 | 398  | 0. 38175 | 4. 940368652 | 1  |
| MSTRG. 33138. 2 | 180  | 0. 45902 | 8. 938537598 | 1  |
| MSTRG. 33141. 2 | 142  | 0. 33757 | 5. 283752441 | 1  |
| MSTRG. 33144. 1 | 432  | 0. 42794 | 8. 115783691 | 1  |
| MSTRG. 33144. 2 | 432  | 0. 42794 | 8. 115783691 | 1  |
| MSTRG. 33150. 2 | 157  | 0. 28503 | 6. 402160645 | 1  |
| MSTRG. 33151. 1 | 104  | 0. 29268 | 4. 796691895 | 1  |
| MSTRG. 33148. 1 | 348  | 0. 31763 | 8. 435241699 | 1  |
| MSTRG. 33155. 2 | 149  | 0. 31705 | 10. 03729248 | 1  |
| MSTRG. 33158. 1 | 544  | 0. 32642 | 5. 37689209  | 1  |
| MSTRG. 33161. 1 | 669  | 0. 45168 | 6. 218688965 | 1  |
| MSTRG. 33161. 2 | 840  | 0. 47932 | 5. 671447754 | -1 |
| MSTRG. 33161. 3 | 881  | 0. 47143 | 5. 861999512 | -1 |
| MSTRG. 33164. 1 | 153  | 0. 3846  | 4. 554626465 | 1  |
| MSTRG. 33165. 1 | 153  | 0. 3846  | 4. 554626465 | 1  |
| MSTRG. 33166. 1 | 176  | 0. 39599 | 4. 96685791  | 1  |
| MSTRG. 33166. 2 | 176  | 0. 39523 | 4. 96685791  | 1  |
| MSTRG. 33168. 1 | 53   | 0. 44412 | 6. 62701416  | 1  |
| MSTRG. 33172. 1 | 54   | 0. 445   | 10. 29498291 | -1 |
| MSTRG. 33179. 1 | 109  | 0. 30152 | 10. 12298584 | 1  |
| MSTRG. 33189. 1 | 225  | 0. 35269 | 8. 640441895 | -1 |
| MSTRG. 33224. 2 | 390  | 0. 37608 | 6. 22454834  | 1  |
| MSTRG. 33224. 3 | 390  | 0. 39557 | 6. 22454834  | 1  |
| MSTRG. 33223. 1 | 65   | 0. 45351 | 10. 54864502 | 1  |
| MSTRG. 33234. 1 | 106  | 0. 43778 | 11. 31500244 | -1 |
| MSTRG. 33248. 1 | 76   | 0. 29864 | 8. 20513916  | 1  |
| MSTRG. 33249. 1 | 52   | 0. 35163 | 8. 093200684 | 1  |
| MSTRG. 33245. 1 | 476  | 0. 42775 | 9. 110778809 | 1  |
| MSTRG. 33278. 2 | 256  | 0. 39409 | 5. 038635254 | 1  |
| MSTRG. 33280. 1 | 187  | 0. 38787 | 4. 70135498  | 1  |
| MSTRG. 33282. 4 | 82   | 0. 28576 | 10. 24664307 | 1  |
| MSTRG. 33284. 1 | 1806 | 0. 44965 | 5. 108825684 | 1  |
| MSTRG. 33287. 3 | 470  | 0. 44604 | 9. 009338379 | 1  |
| MSTRG. 33301. 2 | 189  | 0. 30446 | 8. 831970215 | 1  |
| MSTRG. 33306. 3 | 174  | 0. 29708 | 9. 207336426 | 1  |
| MSTRG. 33309. 1 | 343  | 0. 28683 | 9. 096252441 | 1  |
| MSTRG. 33309. 3 | 519  | 0. 38314 | 4. 86151123  | 1  |
| MSTRG. 33319. 1 | 44   | 0. 43898 | 6. 688171387 | 1  |
| MSTRG. 33322. 3 | 823  | 0. 31852 | 6. 42364502  | 1  |
| MSTRG. 33322. 4 | 823  | 0. 2985  | 6. 42364502  | 1  |
| MSTRG. 33322. 5 | 78   | 0. 28982 | 6. 542175293 | 1  |
| MSTRG. 33323. 1 | 115  | 0. 29387 | 6. 554382324 | 1  |
| MSTRG. 33325. 2 | 905  | 0. 39709 | 5. 868469238 | 1  |
| MSTRG. 33325. 4 | 906  | 0. 42586 | 5. 868469238 | 1  |
| MSTRG. 33325. 5 | 894  | 0. 39792 | 8. 337463379 | 1  |
| MSTRG. 33333. 1 | 496  | 0. 39029 | 7. 22833252  | 1  |
| MSTRG. 33333. 2 | 578  | 0. 37351 | 8. 267150879 | 1  |
| MSTRG. 33333. 5 | 578  | 0. 36197 | 8. 267150879 | 1  |
| MSTRG. 33333. 4 | 508  | 0. 31941 | 6. 915344238 | 1  |
| MSTRG. 33328. 1 | 775  | 0. 39263 | 9. 022399902 | 1  |
| MSTRG. 33329. 1 | 611  | 0. 44249 | 9. 282165527 | 1  |

|                  |      |          |              |    |
|------------------|------|----------|--------------|----|
| MSTRG. 33329. 2  | 795  | 0. 41425 | 9. 318786621 | 1  |
| MSTRG. 33329. 4  | 606  | 0. 46666 | 9. 282165527 | 1  |
| MSTRG. 33329. 5  | 207  | 0. 37979 | 8. 465026855 | 1  |
| MSTRG. 33338. 1  | 336  | 0. 35244 | 9. 241882324 | 1  |
| MSTRG. 33338. 3  | 96   | 0. 2912  | 9. 760681152 | 1  |
| MSTRG. 33339. 1  | 39   | 0. 38772 | 8. 462341309 | 1  |
| MSTRG. 33348. 1  | 58   | 0. 43429 | 9. 804748535 | 1  |
| MSTRG. 33367. 7  | 816  | 0. 49163 | 5. 20513916  | 1  |
| MSTRG. 33373. 2  | 509  | 0. 3276  | 5. 868469238 | 1  |
| MSTRG. 33373. 3  | 566  | 0. 34908 | 6. 101379395 | 1  |
| MSTRG. 33373. 5  | 247  | 0. 35315 | 7. 624816895 | 1  |
| MSTRG. 33373. 4  | 376  | 0. 32522 | 5. 786560059 | 1  |
| MSTRG. 33373. 8  | 376  | 0. 41495 | 5. 786560059 | 1  |
| MSTRG. 33374. 1  | 69   | 0. 3271  | 6. 51348877  | 1  |
| MSTRG. 33369. 2  | 406  | 0. 42271 | 5. 774353027 | 1  |
| MSTRG. 33369. 3  | 511  | 0. 45564 | 5. 230651855 | 1  |
| MSTRG. 33376. 1  | 73   | 0. 3802  | 12. 52459717 | 1  |
| MSTRG. 33386. 1  | 52   | 0. 26294 | 5. 343078613 | 1  |
| MSTRG. 33388. 1  | 37   | 0. 34348 | 7. 922790527 | 1  |
| MSTRG. 33389. 2  | 860  | 0. 48053 | 6. 305358887 | 1  |
| MSTRG. 33391. 1  | 1226 | 0. 37981 | 6. 068664551 | 1  |
| MSTRG. 33398. 2  | 164  | 0. 39026 | 5. 994567871 | 1  |
| MSTRG. 33398. 1  | 164  | 0. 38482 | 5. 994567871 | 1  |
| MSTRG. 33400. 2  | 714  | 0. 41087 | 12. 16278076 | 1  |
| MSTRG. 33400. 1  | 651  | 0. 4134  | 12. 20172119 | 1  |
| MSTRG. 33400. 5  | 651  | 0. 4112  | 12. 20172119 | 1  |
| MSTRG. 33403. 5  | 785  | 0. 43233 | 5. 390441895 | 1  |
| MSTRG. 33404. 1  | 91   | 0. 36795 | 10. 19732666 | 1  |
| MSTRG. 33405. 2  | 558  | 0. 4775  | 7. 721862793 | 1  |
| MSTRG. 33405. 3  | 496  | 0. 40491 | 6. 219787598 | 1  |
| MSTRG. 33417. 1  | 41   | 0. 39141 | 10. 05596924 | -1 |
| MSTRG. 33419. 13 | 135  | 0. 42576 | 3. 923278809 | 1  |
| MSTRG. 33419. 20 | 119  | 0. 42817 | 3. 839782715 | 1  |
| MSTRG. 33419. 23 | 116  | 0. 42303 | 3. 867370605 | 1  |
| MSTRG. 33419. 24 | 117  | 0. 42303 | 3. 867370605 | 1  |
| MSTRG. 33408. 3  | 403  | 0. 37406 | 3. 911437988 | 1  |
| MSTRG. 33423. 3  | 1513 | 0. 45871 | 5. 388122559 | 1  |
| MSTRG. 33423. 4  | 1597 | 0. 46175 | 5. 335998535 | 1  |
| MSTRG. 33424. 1  | 861  | 0. 39528 | 8. 244812012 | 1  |
| MSTRG. 33424. 2  | 1257 | 0. 37643 | 9. 246398926 | 1  |
| MSTRG. 33424. 3  | 1154 | 0. 42526 | 6. 517150879 | 1  |
| MSTRG. 33443. 13 | 3215 | 0. 47416 | 4. 932678223 | 1  |
| MSTRG. 33443. 9  | 4122 | 0. 47134 | 5. 036071777 | 1  |
| MSTRG. 33443. 3  | 4402 | 0. 47134 | 5. 075500488 | 1  |
| MSTRG. 33443. 11 | 4417 | 0. 45699 | 5. 09197998  | 1  |
| MSTRG. 33443. 14 | 4417 | 0. 45699 | 5. 09197998  | 1  |
| MSTRG. 33443. 6  | 4417 | 0. 45699 | 5. 09197998  | 1  |
| MSTRG. 33443. 5  | 4412 | 0. 45699 | 5. 101501465 | 1  |
| MSTRG. 33443. 15 | 4417 | 0. 37186 | 5. 09197998  | 1  |
| MSTRG. 33448. 8  | 1024 | 0. 38804 | 8. 618835449 | 1  |
| MSTRG. 33450. 1  | 994  | 0. 42439 | 9. 28704834  | 1  |
| MSTRG. 33451. 1  | 128  | 0. 33331 | 5. 652770996 | 1  |
| MSTRG. 33452. 1  | 96   | 0. 32209 | 9. 510803223 | 1  |
| MSTRG. 33453. 1  | 1743 | 0. 45195 | 5. 289978027 | 1  |

|                 |      |          |              |    |
|-----------------|------|----------|--------------|----|
| MSTRG. 33453. 2 | 1743 | 0. 44915 | 5. 289978027 | 1  |
| MSTRG. 33453. 3 | 1743 | 0. 44915 | 5. 289978027 | 1  |
| MSTRG. 33453. 4 | 1743 | 0. 4499  | 5. 289978027 | 1  |
| MSTRG. 33453. 5 | 1743 | 0. 43368 | 5. 289978027 | 1  |
| MSTRG. 33453. 6 | 877  | 0. 45891 | 5. 77532959  | 1  |
| MSTRG. 33430. 1 | 54   | 0. 42649 | 4. 794006348 | -1 |
| MSTRG. 33439. 2 | 439  | 0. 49643 | 8. 795715332 | 1  |
| MSTRG. 33439. 3 | 434  | 0. 38155 | 9. 034484863 | 1  |
| MSTRG. 33444. 1 | 58   | 0. 3556  | 4. 442565918 | 1  |
| MSTRG. 33466. 2 | 206  | 0. 4015  | 5. 374572754 | 1  |
| MSTRG. 33467. 1 | 20   | 0. 37044 | 8. 518737793 | 1  |
| MSTRG. 33482. 1 | 536  | 0. 46658 | 4. 288879395 | 1  |
| MSTRG. 33482. 3 | 569  | 0. 47011 | 4. 37310791  | 1  |
| MSTRG. 33483. 1 | 309  | 0. 43705 | 8. 927185059 | 1  |
| MSTRG. 33482. 5 | 766  | 0. 45607 | 4. 444763184 | 1  |
| MSTRG. 33482. 6 | 611  | 0. 47124 | 4. 194885254 | 1  |
| MSTRG. 33482. 7 | 604  | 0. 47124 | 4. 219299316 | 1  |
| MSTRG. 33482. 8 | 601  | 0. 47124 | 4. 201721191 | 1  |
| MSTRG. 33519. 1 | 846  | 0. 3869  | 6. 774841309 | 1  |
| MSTRG. 33521. 1 | 826  | 0. 37957 | 6. 652526855 | 1  |
| MSTRG. 33525. 1 | 78   | 0. 45195 | 9. 696105957 | 1  |
| MSTRG. 33534. 1 | 114  | 0. 27794 | 8. 356262207 | 1  |
| MSTRG. 33534. 2 | 114  | 0. 33746 | 8. 356262207 | 1  |
| MSTRG. 33535. 4 | 1006 | 0. 39213 | 8. 281311035 | 1  |
| MSTRG. 33535. 5 | 999  | 0. 39662 | 7. 851501465 | 1  |
| MSTRG. 33535. 6 | 999  | 0. 38243 | 7. 851501465 | 1  |
| MSTRG. 33536. 1 | 117  | 0. 37792 | 5. 900817871 | -1 |
| MSTRG. 33535. 7 | 196  | 0. 32884 | 6. 426330566 | 1  |
| MSTRG. 33537. 1 | 222  | 0. 37324 | 5. 80291748  | -1 |
| MSTRG. 33535. 8 | 102  | 0. 30088 | 6. 570495605 | 1  |
| MSTRG. 33535. 9 | 196  | 0. 46783 | 6. 426330566 | 1  |
| MSTRG. 33546. 1 | 661  | 0. 40871 | 6. 731994629 | 1  |
| MSTRG. 33546. 3 | 661  | 0. 4079  | 6. 731994629 | 1  |
| MSTRG. 33548. 4 | 2554 | 0. 48397 | 5. 51751709  | 1  |
| MSTRG. 33553. 1 | 1338 | 0. 41228 | 8. 926696777 | 1  |
| MSTRG. 33553. 2 | 1338 | 0. 41228 | 8. 926696777 | 1  |
| MSTRG. 33553. 3 | 1294 | 0. 41228 | 8. 891296387 | 1  |
| MSTRG. 33555. 1 | 197  | 0. 32181 | 5. 684753418 | 1  |
| MSTRG. 33553. 8 | 1318 | 0. 45798 | 9. 114562988 | 1  |
| MSTRG. 33550. 2 | 171  | 0. 39994 | 6. 876647949 | 1  |
| MSTRG. 33559. 4 | 676  | 0. 372   | 5. 298400879 | 1  |
| MSTRG. 33568. 1 | 74   | 0. 44088 | 10. 29779053 | -1 |
| MSTRG. 33573. 1 | 207  | 0. 29772 | 6. 304992676 | 1  |
| MSTRG. 33577. 2 | 288  | 0. 32477 | 4. 971374512 | 1  |
| MSTRG. 33577. 1 | 218  | 0. 33929 | 5. 146179199 | 1  |
| MSTRG. 33587. 3 | 98   | 0. 37852 | 10. 14666748 | 1  |
| MSTRG. 33609. 2 | 717  | 0. 33888 | 8. 730285645 | 1  |
| MSTRG. 33614. 1 | 337  | 0. 40233 | 9. 995300293 | 1  |
| MSTRG. 33613. 2 | 436  | 0. 43959 | 8. 276428223 | 1  |
| MSTRG. 33619. 1 | 281  | 0. 43885 | 9. 664611816 | 1  |
| MSTRG. 33619. 2 | 281  | 0. 45073 | 9. 664611816 | 1  |
| MSTRG. 33627. 2 | 340  | 0. 44278 | 9. 410827637 | 1  |
| MSTRG. 33629. 2 | 607  | 0. 46778 | 4. 721740723 | 1  |
| MSTRG. 33629. 1 | 614  | 0. 4773  | 4. 67791748  | 1  |

|                  |      |          |              |    |
|------------------|------|----------|--------------|----|
| MSTRG. 33629. 4  | 589  | 0. 45219 | 4. 699645996 | 1  |
| MSTRG. 33629. 6  | 614  | 0. 45935 | 4. 655090332 | 1  |
| MSTRG. 33629. 3  | 614  | 0. 46705 | 4. 67791748  | 1  |
| MSTRG. 33629. 5  | 614  | 0. 46705 | 4. 684387207 | 1  |
| MSTRG. 33629. 7  | 614  | 0. 46705 | 4. 684387207 | 1  |
| MSTRG. 33629. 10 | 614  | 0. 45935 | 4. 684387207 | 1  |
| MSTRG. 33629. 8  | 614  | 0. 45935 | 4. 684387207 | 1  |
| MSTRG. 33629. 9  | 614  | 0. 45935 | 4. 671203613 | 1  |
| MSTRG. 33629. 11 | 589  | 0. 45064 | 4. 699645996 | 1  |
| MSTRG. 33634. 2  | 1398 | 0. 46081 | 5. 475402832 | 1  |
| MSTRG. 33634. 4  | 357  | 0. 46063 | 4. 651428223 | 1  |
| MSTRG. 33639. 6  | 604  | 0. 4483  | 8. 296569824 | 1  |
| MSTRG. 33639. 7  | 80   | 0. 34931 | 8. 987365723 | 1  |
| MSTRG. 33648. 2  | 260  | 0. 44197 | 5. 739685059 | 1  |
| MSTRG. 33648. 5  | 260  | 0. 45471 | 5. 608215332 | 1  |
| MSTRG. 33649. 1  | 889  | 0. 49692 | 9. 01348877  | 1  |
| MSTRG. 33649. 3  | 879  | 0. 48581 | 8. 965270996 | 1  |
| MSTRG. 33654. 2  | 302  | 0. 29178 | 6. 870056152 | 1  |
| MSTRG. 33658. 1  | 249  | 0. 42783 | 7. 860046387 | 1  |
| MSTRG. 33662. 3  | 712  | 0. 44652 | 6. 680114746 | 1  |
| MSTRG. 33662. 4  | 712  | 0. 4129  | 6. 680114746 | 1  |
| MSTRG. 33661. 1  | 179  | 0. 3439  | 8. 297790527 | 1  |
| MSTRG. 33664. 6  | 724  | 0. 46914 | 9. 036437988 | 1  |
| MSTRG. 33664. 2  | 640  | 0. 43403 | 9. 362243652 | 1  |
| MSTRG. 33664. 3  | 716  | 0. 37819 | 9. 058654785 | 1  |
| MSTRG. 33664. 4  | 648  | 0. 44789 | 9. 342468262 | 1  |
| MSTRG. 33664. 7  | 614  | 0. 43775 | 9. 370178223 | 1  |
| MSTRG. 33664. 8  | 604  | 0. 43555 | 9. 323791504 | 1  |
| MSTRG. 33664. 9  | 511  | 0. 454   | 9. 317321777 | 1  |
| MSTRG. 33664. 10 | 92   | 0. 2785  | 9. 03729248  | 1  |
| MSTRG. 33666. 1  | 151  | 0. 31248 | 8. 340148926 | 1  |
| MSTRG. 33669. 2  | 131  | 0. 34727 | 9. 454650879 | -1 |
| MSTRG. 33669. 1  | 90   | 0. 28567 | 9. 467346191 | 1  |
| MSTRG. 33670. 2  | 1221 | 0. 4873  | 5. 655822754 | 1  |
| MSTRG. 33676. 1  | 658  | 0. 41763 | 7. 263122559 | 1  |
| MSTRG. 33676. 2  | 658  | 0. 37874 | 7. 263122559 | 1  |
| MSTRG. 33676. 3  | 658  | 0. 42993 | 7. 263122559 | 1  |
| MSTRG. 33679. 1  | 70   | 0. 30006 | 9. 094543457 | 1  |
| MSTRG. 33679. 2  | 55   | 0. 27849 | 9. 492736816 | 1  |
| MSTRG. 33681. 1  | 914  | 0. 3849  | 9. 533874512 | 1  |
| MSTRG. 33682. 1  | 183  | 0. 38644 | 10. 22991943 | 1  |
| MSTRG. 33683. 1  | 1204 | 0. 45478 | 4. 30645752  | 1  |
| MSTRG. 33683. 2  | 1174 | 0. 45313 | 4. 385925293 | 1  |
| MSTRG. 33683. 3  | 634  | 0. 39447 | 4. 512756348 | 1  |
| MSTRG. 33686. 2  | 563  | 0. 44155 | 6. 07598877  | -1 |
| MSTRG. 33687. 3  | 89   | 0. 28711 | 12. 17852783 | 1  |
| MSTRG. 33688. 2  | 1526 | 0. 37058 | 6. 627624512 | 1  |
| MSTRG. 33690. 1  | 163  | 0. 28923 | 10. 43084717 | 1  |
| MSTRG. 33690. 2  | 157  | 0. 28338 | 10. 68353271 | 1  |
| MSTRG. 33692. 1  | 144  | 0. 28503 | 10. 05474854 | 1  |
| MSTRG. 33692. 2  | 149  | 0. 28503 | 9. 614196777 | 1  |
| MSTRG. 33692. 3  | 198  | 0. 28584 | 8. 88494873  | 1  |
| MSTRG. 33709. 1  | 216  | 0. 36195 | 11. 56365967 | 1  |
| MSTRG. 33709. 2  | 216  | 0. 4015  | 11. 56365967 | 1  |



|                |     |         |             |    |
|----------------|-----|---------|-------------|----|
| MSTRG. 33709.3 | 216 | 0.3615  | 11.56365967 | 1  |
| MSTRG. 33709.4 | 129 | 0.36261 | 10.41766357 | 1  |
| MSTRG. 33709.5 | 216 | 0.40003 | 11.56365967 | 1  |
| MSTRG. 33709.6 | 216 | 0.40298 | 11.56365967 | 1  |
| MSTRG. 33712.1 | 502 | 0.44026 | 8.889099121 | 1  |
| MSTRG. 33712.2 | 485 | 0.39853 | 9.066345215 | 1  |
| MSTRG. 33713.1 | 224 | 0.38471 | 7.258483887 | 1  |
| MSTRG. 33714.1 | 139 | 0.36389 | 9.476257324 | 1  |
| MSTRG. 33729.1 | 246 | 0.33535 | 5.916320801 | 1  |
| MSTRG. 33731.1 | 851 | 0.49304 | 6.06829834  | 1  |
| MSTRG. 33744.3 | 302 | 0.4433  | 9.20135498  | 1  |
| MSTRG. 33754.2 | 114 | 0.38921 | 11.13922119 | 1  |
| MSTRG. 33754.1 | 114 | 0.38613 | 11.34991455 | 1  |
| MSTRG. 33754.4 | 114 | 0.39073 | 11.34991455 | 1  |
| MSTRG. 33754.5 | 114 | 0.39073 | 11.34991455 | 1  |
| MSTRG. 33754.3 | 114 | 0.35886 | 11.34991455 | 1  |
| MSTRG. 33754.6 | 114 | 0.43348 | 11.34991455 | 1  |
| MSTRG. 33756.2 | 666 | 0.45579 | 7.817687988 | 1  |
| MSTRG. 33760.1 | 100 | 0.45696 | 11.86322021 | 1  |
| MSTRG. 33760.2 | 54  | 0.37285 | 8.487243652 | -1 |
| MSTRG. 33764.1 | 131 | 0.41834 | 10.5133667  | 1  |
| MSTRG. 33758.1 | 114 | 0.40192 | 11.58917236 | 1  |
| MSTRG. 33768.1 | 528 | 0.3791  | 5.404602051 | 1  |
| MSTRG. 33768.2 | 528 | 0.27867 | 5.404602051 | 1  |
| MSTRG. 33768.3 | 260 | 0.27327 | 6.57232666  | 1  |
| MSTRG. 33768.4 | 528 | 0.43284 | 5.404602051 | 1  |
| MSTRG. 33769.1 | 114 | 0.29637 | 8.438293457 | 1  |
| MSTRG. 33770.1 | 108 | 0.29551 | 9.676574707 | 1  |
| MSTRG. 33768.5 | 122 | 0.2846  | 8.743591309 | -1 |
| MSTRG. 33768.6 | 130 | 0.32431 | 9.757019043 | 1  |
| MSTRG. 33771.1 | 125 | 0.28284 | 8.480773926 | 1  |
| MSTRG. 33772.1 | 92  | 0.27782 | 9.296813965 | 1  |
| MSTRG. 33773.1 | 156 | 0.26837 | 9.613098145 | 1  |
| MSTRG. 33787.1 | 99  | 0.32501 | 9.231262207 | 1  |
| MSTRG. 33789.1 | 133 | 0.39538 | 8.69329834  | 1  |
| MSTRG. 33792.1 | 74  | 0.37217 | 5.625427246 | 1  |
| MSTRG. 33793.1 | 68  | 0.36426 | 11.71173096 | 1  |
| MSTRG. 33791.1 | 174 | 0.5007  | 4.922058105 | 1  |
| MSTRG. 33813.2 | 347 | 0.35621 | 6.431945801 | 1  |
| MSTRG. 33813.4 | 310 | 0.2785  | 8.582458496 | 1  |
| MSTRG. 33813.5 | 310 | 0.2785  | 8.582458496 | 1  |
| MSTRG. 33813.6 | 173 | 0.29927 | 6.905700684 | 1  |
| MSTRG. 33815.1 | 179 | 0.28267 | 9.50213623  | 1  |
| MSTRG. 33817.1 | 64  | 0.31034 | 7.815124512 | 1  |
| MSTRG. 33819.2 | 289 | 0.42179 | 9.192565918 | 1  |
| MSTRG. 33820.1 | 425 | 0.35665 | 5.331481934 | 1  |
| MSTRG. 33820.2 | 389 | 0.36654 | 5.583312988 | 1  |
| MSTRG. 33820.4 | 425 | 0.36874 | 5.331481934 | 1  |
| MSTRG. 33822.1 | 143 | 0.45188 | 7.010681152 | -1 |
| MSTRG. 33824.1 | 63  | 0.46978 | 7.782287598 | 1  |
| MSTRG. 33817.2 | 707 | 0.42539 | 5.918395996 | 1  |
| MSTRG. 33817.4 | 104 | 0.32831 | 5.833312988 | 1  |
| MSTRG. 33804.1 | 7   | 0.2525  | 5.272766113 | 1  |
| MSTRG. 33803.1 | 6   | 0.41142 | 6.507263184 | 1  |

|                 |     |          |              |    |
|-----------------|-----|----------|--------------|----|
| MSTRG. 33805. 1 | 57  | 0. 34128 | 8. 018859863 | 1  |
| MSTRG. 33806. 1 | 4   | 0. 31617 | 5. 274963379 | 1  |
| MSTRG. 33806. 2 | 19  | 0. 34647 | 6. 492004395 | 1  |
| MSTRG. 33809. 1 | 16  | 0. 45483 | 6. 50567627  | 1  |
| MSTRG. 33810. 1 | 12  | 0. 24946 | 6. 487731934 | 1  |
| MSTRG. 33811. 1 | 19  | 0. 26503 | 6. 492004395 | 1  |
| MSTRG. 33812. 1 | 57  | 0. 34559 | 8. 842468262 | 1  |
| MSTRG. 33812. 2 | 57  | 0. 35463 | 8. 842468262 | 1  |
| MSTRG. 33846. 1 | 206 | 0. 39917 | 6. 28314209  | 1  |
| MSTRG. 33829. 1 | 80  | 0. 35677 | 5. 458312988 | 1  |
| MSTRG. 33831. 1 | 106 | 0. 30388 | 8. 950256348 | 1  |
| MSTRG. 33831. 2 | 113 | 0. 27437 | 8. 373352051 | 1  |
| MSTRG. 33831. 3 | 48  | 0. 33528 | 10. 08966064 | 1  |
| MSTRG. 33831. 4 | 43  | 0. 33296 | 10. 09747314 | 1  |
| MSTRG. 33832. 1 | 149 | 0. 35031 | 7. 624328613 | 1  |
| MSTRG. 33832. 2 | 147 | 0. 33309 | 10. 86273193 | 1  |
| MSTRG. 33838. 1 | 26  | 0. 32742 | 8. 210388184 | 1  |
| MSTRG. 33839. 1 | 62  | 0. 36515 | 6. 546325684 | -1 |
| MSTRG. 33839. 2 | 48  | 0. 36331 | 5. 658508301 | 1  |
| MSTRG. 33841. 1 | 88  | 0. 31649 | 10. 36431885 | 1  |
| MSTRG. 33843. 1 | 77  | 0. 25541 | 6. 927062988 | 1  |
| MSTRG. 33851. 1 | 42  | 0. 41653 | 6. 012878418 | 1  |
| MSTRG. 33852. 1 | 92  | 0. 34932 | 8. 042419434 | 1  |
| MSTRG. 33858. 1 | 102 | 0. 28396 | 11. 31890869 | 1  |
| MSTRG. 33860. 1 | 67  | 0. 28396 | 8. 649841309 | 1  |
| MSTRG. 33861. 1 | 85  | 0. 25635 | 8. 591247559 | 1  |
| MSTRG. 33863. 1 | 85  | 0. 31683 | 8. 591247559 | 1  |
| MSTRG. 33865. 1 | 52  | 0. 44785 | 11. 39508057 | 1  |
| MSTRG. 33868. 1 | 196 | 0. 27251 | 6. 270568848 | 1  |
| MSTRG. 33868. 2 | 196 | 0. 27379 | 6. 270568848 | 1  |
| MSTRG. 33869. 1 | 44  | 0. 31329 | 9. 296569824 | -1 |
| MSTRG. 33869. 2 | 44  | 0. 31753 | 9. 296569824 | -1 |
| MSTRG. 33875. 1 | 164 | 0. 30475 | 7. 296691895 | -1 |
| MSTRG. 33875. 2 | 164 | 0. 27466 | 7. 296691895 | -1 |
| MSTRG. 33875. 4 | 164 | 0. 37492 | 7. 296691895 | -1 |
| MSTRG. 33875. 6 | 164 | 0. 30866 | 7. 296691895 | -1 |
| MSTRG. 33874. 1 | 84  | 0. 42376 | 11. 5803833  | -1 |
| MSTRG. 33879. 1 | 44  | 0. 37651 | 7. 655700684 | 1  |
| MSTRG. 33882. 1 | 385 | 0. 40862 | 9. 650085449 | 1  |
| MSTRG. 33883. 1 | 38  | 0. 33963 | 9. 09979248  | 1  |
| MSTRG. 33886. 1 | 51  | 0. 35423 | 6. 803161621 | 1  |
| MSTRG. 33880. 1 | 62  | 0. 34809 | 9. 737243652 | 1  |
| MSTRG. 33881. 1 | 40  | 0. 31811 | 9. 976501465 | 1  |
| MSTRG. 33896. 2 | 237 | 0. 29988 | 6. 086364746 | 1  |
| MSTRG. 33896. 3 | 171 | 0. 30781 | 8. 347351074 | 1  |
| MSTRG. 33896. 1 | 237 | 0. 28338 | 6. 086364746 | 1  |
| MSTRG. 33896. 4 | 310 | 0. 34234 | 5. 798034668 | 1  |
| MSTRG. 33896. 5 | 371 | 0. 34283 | 6. 464416504 | 1  |
| MSTRG. 33896. 6 | 301 | 0. 34393 | 8. 14642334  | 1  |
| MSTRG. 33894. 2 | 59  | 0. 38606 | 7. 737731934 | 1  |
| MSTRG. 33898. 1 | 56  | 0. 33294 | 8. 840759277 | 1  |
| MSTRG. 33898. 2 | 56  | 0. 33294 | 8. 840759277 | 1  |
| MSTRG. 33898. 3 | 112 | 0. 34984 | 9. 659240723 | 1  |
| MSTRG. 33898. 4 | 26  | 0. 44028 | 9. 782165527 | 1  |

|                  |     |          |              |    |
|------------------|-----|----------|--------------|----|
| MSTRG. 33898. 5  | 50  | 0. 41334 | 8. 63092041  | 1  |
| MSTRG. 33898. 6  | 40  | 0. 41129 | 7. 999938965 | 1  |
| MSTRG. 33899. 1  | 86  | 0. 36263 | 9. 434387207 | 1  |
| MSTRG. 33899. 2  | 93  | 0. 30966 | 9. 245422363 | 1  |
| MSTRG. 33899. 3  | 93  | 0. 30966 | 9. 245422363 | 1  |
| MSTRG. 33899. 4  | 93  | 0. 30966 | 9. 245422363 | 1  |
| MSTRG. 33898. 7  | 40  | 0. 42793 | 9. 492736816 | 1  |
| MSTRG. 33901. 1  | 55  | 0. 46631 | 9. 510559082 | 1  |
| MSTRG. 33901. 2  | 55  | 0. 47189 | 9. 510559082 | 1  |
| MSTRG. 33901. 3  | 81  | 0. 42423 | 9. 063415527 | 1  |
| MSTRG. 33901. 4  | 83  | 0. 4406  | 9. 250549316 | 1  |
| MSTRG. 33901. 5  | 55  | 0. 33589 | 10. 69012451 | 1  |
| MSTRG. 33901. 6  | 35  | 0. 41371 | 5. 332092285 | -1 |
| MSTRG. 33901. 7  | 25  | 0. 44785 | 5. 426330566 | -1 |
| MSTRG. 33901. 8  | 51  | 0. 43786 | 10. 01275635 | 1  |
| MSTRG. 33901. 9  | 55  | 0. 4555  | 10. 16790771 | 1  |
| MSTRG. 33903. 1  | 343 | 0. 42461 | 6. 430358887 | 1  |
| MSTRG. 33910. 1  | 0   | 0. 32015 | 0            | -1 |
| MSTRG. 33910. 2  | 0   | 0. 33327 | 0            | -1 |
| MSTRG. 33914. 2  | 343 | 0. 44251 | 6. 779724121 | 1  |
| MSTRG. 33914. 1  | 343 | 0. 43786 | 6. 779724121 | 1  |
| MSTRG. 33914. 3  | 343 | 0. 45869 | 6. 779724121 | 1  |
| MSTRG. 33917. 1  | 35  | 0. 35421 | 10. 94671631 | -1 |
| MSTRG. 33911. 1  | 43  | 0. 32396 | 10. 25469971 | -1 |
| MSTRG. 33920. 2  | 48  | 0. 30644 | 5. 751037598 | 1  |
| MSTRG. 33920. 3  | 48  | 0. 30328 | 5. 751037598 | 1  |
| MSTRG. 33921. 2  | 62  | 0. 32414 | 10. 21368408 | -1 |
| MSTRG. 33921. 3  | 55  | 0. 30324 | 6. 696960449 | 1  |
| MSTRG. 33922. 1  | 104 | 0. 41585 | 7. 680847168 | 1  |
| MSTRG. 33922. 2  | 32  | 0. 41699 | 5. 49822998  | 1  |
| MSTRG. 33949. 1  | 39  | 0. 45428 | 9. 035583496 | 1  |
| MSTRG. 33949. 2  | 32  | 0. 39993 | 5. 49822998  | 1  |
| MSTRG. 33949. 3  | 47  | 0. 43862 | 4. 51739502  | 1  |
| MSTRG. 33950. 2  | 137 | 0. 36411 | 7. 016784668 | 1  |
| MSTRG. 33950. 5  | 195 | 0. 36816 | 8. 906555176 | 1  |
| MSTRG. 33950. 6  | 137 | 0. 3217  | 7. 016784668 | 1  |
| MSTRG. 33950. 7  | 120 | 0. 38613 | 6. 29876709  | 1  |
| MSTRG. 33950. 12 | 67  | 0. 42434 | 11. 09954834 | 1  |
| MSTRG. 33950. 10 | 67  | 0. 33257 | 8. 291320801 | 1  |
| MSTRG. 33950. 13 | 158 | 0. 3195  | 8. 694152832 | 1  |
| MSTRG. 33950. 14 | 249 | 0. 3195  | 6. 153259277 | 1  |
| MSTRG. 33950. 9  | 158 | 0. 3195  | 8. 694152832 | 1  |
| MSTRG. 33950. 11 | 94  | 0. 33959 | 9. 070983887 | 1  |
| MSTRG. 33950. 15 | 98  | 0. 28683 | 7. 799377441 | 1  |
| MSTRG. 33950. 17 | 76  | 0. 3618  | 8. 480895996 | 1  |
| MSTRG. 33950. 19 | 67  | 0. 33714 | 6. 502502441 | 1  |
| MSTRG. 33953. 1  | 95  | 0. 35685 | 4. 913513184 | 1  |
| MSTRG. 33931. 1  | 83  | 0. 28463 | 8. 853088379 | 1  |
| MSTRG. 33932. 1  | 38  | 0. 44621 | 5. 982849121 | 1  |
| MSTRG. 33931. 2  | 63  | 0. 37571 | 5. 869812012 | 1  |
| MSTRG. 33933. 1  | 83  | 0. 38385 | 9. 515563965 | 1  |
| MSTRG. 33934. 1  | 32  | 0. 40097 | 8. 275817871 | -1 |
| MSTRG. 33928. 1  | 80  | 0. 36914 | 9. 566101074 | 1  |
| MSTRG. 33929. 1  | 116 | 0. 33439 | 8. 864196777 | 1  |

|                  |     |          |              |    |
|------------------|-----|----------|--------------|----|
| MSTRG. 33935. 1  | 117 | 0. 38476 | 6. 692810059 | -1 |
| MSTRG. 33941. 2  | 95  | 0. 30661 | 6. 864318848 | 1  |
| MSTRG. 33944. 1  | 90  | 0. 34091 | 11. 19415283 | 1  |
| MSTRG. 33946. 1  | 62  | 0. 30946 | 7. 642028809 | 1  |
| MSTRG. 33946. 2  | 62  | 0. 30946 | 7. 642028809 | 1  |
| MSTRG. 33946. 3  | 25  | 0. 28337 | 5. 530822754 | 1  |
| MSTRG. 33947. 1  | 49  | 0. 33621 | 9. 368591309 | -1 |
| MSTRG. 33960. 1  | 86  | 0. 26413 | 8. 845153809 | 1  |
| MSTRG. 33960. 2  | 164 | 0. 28432 | 5. 336364746 | 1  |
| MSTRG. 33960. 7  | 164 | 0. 31325 | 5. 336364746 | 1  |
| MSTRG. 33960. 8  | 164 | 0. 34875 | 5. 336364746 | 1  |
| MSTRG. 33960. 9  | 164 | 0. 42033 | 5. 336364746 | 1  |
| MSTRG. 33960. 10 | 164 | 0. 35732 | 5. 336364746 | 1  |
| MSTRG. 33960. 11 | 164 | 0. 35732 | 5. 336364746 | 1  |
| MSTRG. 33963. 1  | 72  | 0. 44937 | 3. 94720459  | 1  |
| MSTRG. 33964. 1  | 66  | 0. 29307 | 7. 864440918 | 1  |
| MSTRG. 33965. 1  | 62  | 0. 34431 | 10. 01409912 | 1  |
| MSTRG. 33965. 2  | 62  | 0. 39718 | 9. 743591309 | 1  |
| MSTRG. 33966. 1  | 63  | 0. 30431 | 6. 24420166  | -1 |
| MSTRG. 33962. 1  | 52  | 0. 3859  | 12. 00421143 | 1  |
| MSTRG. 33962. 2  | 52  | 0. 37991 | 12. 00421143 | 1  |
| MSTRG. 33967. 1  | 52  | 0. 4464  | 11. 00006104 | 1  |
| MSTRG. 33985. 4  | 299 | 0. 28923 | 6. 84564209  | 1  |
| MSTRG. 33985. 7  | 211 | 0. 29772 | 7. 656188965 | 1  |
| MSTRG. 33985. 10 | 318 | 0. 29628 | 8. 144348145 | 1  |
| MSTRG. 33985. 9  | 192 | 0. 33267 | 8. 164978027 | 1  |
| MSTRG. 33985. 11 | 174 | 0. 29772 | 9. 758483887 | 1  |
| MSTRG. 33979. 1  | 57  | 0. 30228 | 9. 184265137 | 1  |
| MSTRG. 33986. 1  | 91  | 0. 38093 | 6. 964538574 | 1  |
| MSTRG. 33986. 2  | 83  | 0. 40885 | 9. 515563965 | 1  |
| MSTRG. 33986. 3  | 55  | 0. 4555  | 9. 033996582 | 1  |
| MSTRG. 33986. 4  | 91  | 0. 47067 | 6. 965637207 | 1  |
| MSTRG. 33987. 1  | 55  | 0. 472   | 9. 510559082 | 1  |
| MSTRG. 33986. 5  | 91  | 0. 46738 | 6. 965637207 | 1  |
| MSTRG. 33992. 1  | 38  | 0. 44245 | 5. 982849121 | 1  |
| MSTRG. 33993. 1  | 55  | 0. 48036 | 9. 510559082 | 1  |
| MSTRG. 33993. 2  | 55  | 0. 45892 | 9. 510559082 | 1  |
| MSTRG. 33998. 1  | 19  | 0. 28743 | 12. 00006104 | 1  |
| MSTRG. 33999. 1  | 51  | 0. 40806 | 12. 00421143 | -1 |
| MSTRG. 34000. 2  | 154 | 0. 28343 | 9. 451477051 | 1  |
| MSTRG. 34000. 3  | 112 | 0. 30521 | 11. 64703369 | 1  |
| MSTRG. 34000. 1  | 135 | 0. 30808 | 9. 683044434 | 1  |
| MSTRG. 34000. 4  | 112 | 0. 27327 | 9. 506164551 | 1  |
| MSTRG. 34000. 5  | 112 | 0. 27327 | 9. 506164551 | 1  |
| MSTRG. 34000. 6  | 112 | 0. 27651 | 9. 506164551 | 1  |
| MSTRG. 34016. 1  | 82  | 0. 3817  | 9. 415466309 | -1 |
| MSTRG. 34016. 2  | 80  | 0. 40822 | 9. 415466309 | -1 |
| MSTRG. 34016. 4  | 74  | 0. 40822 | 8. 639465332 | -1 |
| MSTRG. 34016. 5  | 155 | 0. 28428 | 11. 81097412 | 1  |
| MSTRG. 34016. 6  | 155 | 0. 28428 | 11. 81097412 | 1  |
| MSTRG. 34016. 3  | 93  | 0. 30801 | 9. 245422363 | 1  |
| MSTRG. 34016. 7  | 73  | 0. 40741 | 8. 639465332 | -1 |
| MSTRG. 34016. 8  | 82  | 0. 40741 | 10. 28094482 | 1  |
| MSTRG. 34016. 9  | 155 | 0. 35815 | 11. 81097412 | 1  |

|                  |     |          |              |    |
|------------------|-----|----------|--------------|----|
| MSTRG. 34016. 10 | 56  | 0. 36024 | 8. 840759277 | 1  |
| MSTRG. 34016. 11 | 50  | 0. 41334 | 8. 63092041  | 1  |
| MSTRG. 34016. 12 | 50  | 0. 41334 | 8. 63092041  | 1  |
| MSTRG. 34016. 13 | 50  | 0. 42058 | 8. 63092041  | 1  |
| MSTRG. 34016. 15 | 114 | 0. 34457 | 9. 660217285 | 1  |
| MSTRG. 34016. 14 | 115 | 0. 37375 | 9. 660217285 | 1  |
| MSTRG. 34016. 16 | 115 | 0. 34457 | 9. 660217285 | 1  |
| MSTRG. 34016. 17 | 53  | 0. 36171 | 4. 830871582 | 1  |
| MSTRG. 34016. 18 | 53  | 0. 38297 | 4. 830871582 | 1  |
| MSTRG. 34012. 1  | 44  | 0. 35352 | 11. 7119751  | 1  |
| MSTRG. 34013. 1  | 88  | 0. 36709 | 10. 30267334 | 1  |
| MSTRG. 34017. 1  | 90  | 0. 34761 | 11. 19415283 | 1  |
| MSTRG. 34017. 3  | 41  | 0. 37587 | 8. 883239746 | 1  |
| MSTRG. 34017. 2  | 52  | 0. 35428 | 11. 00006104 | 1  |
| MSTRG. 34017. 4  | 90  | 0. 37988 | 11. 19415283 | 1  |
| MSTRG. 34017. 5  | 52  | 0. 37698 | 11. 00006104 | 1  |
| MSTRG. 34018. 1  | 35  | 0. 39896 | 9. 778991699 | 1  |
| MSTRG. 34026. 2  | 42  | 0. 46191 | 4. 289367676 | -1 |
| MSTRG. 34028. 1  | 96  | 0. 38572 | 9. 695251465 | 1  |
| MSTRG. 34035. 1  | 304 | 0. 44635 | 6. 69354248  | 1  |
| MSTRG. 34037. 1  | 28  | 0. 33533 | 11. 34869385 | -1 |
| MSTRG. 34038. 1  | 47  | 0. 33133 | 4. 63885498  | -1 |
| MSTRG. 34046. 1  | 93  | 0. 35772 | 8. 817199707 | 1  |
| MSTRG. 34046. 2  | 104 | 0. 3202  | 9. 228820801 | 1  |
| MSTRG. 34046. 3  | 93  | 0. 38163 | 8. 817199707 | 1  |
| MSTRG. 34046. 4  | 241 | 0. 31674 | 8. 840515137 | 1  |
| MSTRG. 34046. 5  | 93  | 0. 37062 | 9. 336364746 | 1  |
| MSTRG. 34046. 6  | 241 | 0. 30816 | 8. 840515137 | 1  |
| MSTRG. 34047. 2  | 63  | 0. 46132 | 3. 800476074 | 1  |
| MSTRG. 34052. 1  | 52  | 0. 32184 | 11. 00006104 | 1  |
| MSTRG. 34053. 1  | 40  | 0. 45446 | 7. 999938965 | 1  |
| MSTRG. 34053. 2  | 40  | 0. 43558 | 7. 999938965 | 1  |
| MSTRG. 34055. 1  | 216 | 0. 48286 | 10. 84625244 | 1  |
| MSTRG. 34056. 2  | 84  | 0. 32228 | 7. 70501709  | 1  |
| MSTRG. 34066. 1  | 96  | 0. 36318 | 9. 625793457 | 1  |
| MSTRG. 34072. 1  | 0   | 0. 25855 | 0            | -1 |
| MSTRG. 34072. 2  | 0   | 0. 3076  | 0            | -1 |
| MSTRG. 34072. 3  | 0   | 0. 27064 | 0            | -1 |
| MSTRG. 34072. 4  | 0   | 0. 27064 | 0            | -1 |
| MSTRG. 34072. 5  | 0   | 0. 28165 | 0            | -1 |
| MSTRG. 34088. 1  | 2   | 0. 2789  | 6. 491394043 | 1  |
| MSTRG. 34090. 1  | 19  | 0. 40636 | 6. 492004395 | -1 |
| MSTRG. 34088. 2  | 2   | 0. 36273 | 6. 491394043 | 1  |
| MSTRG. 34084. 1  | 7   | 0. 41378 | 6. 491394043 | -1 |
| MSTRG. 34085. 1  | 2   | 0. 38833 | 6. 491394043 | 1  |
| MSTRG. 34093. 1  | 202 | 0. 45114 | 5. 901550293 | 1  |
| MSTRG. 34094. 1  | 466 | 0. 46807 | 6. 574279785 | -1 |
| MSTRG. 34101. 1  | 49  | 0. 43214 | 7. 746520996 | 1  |
| MSTRG. 34097. 1  | 47  | 0. 44804 | 6. 711730957 | -1 |
| MSTRG. 34108. 2  | 411 | 0. 46212 | 9. 27947998  | 1  |
| MSTRG. 34110. 1  | 35  | 0. 37023 | 5. 791320801 | -1 |
| MSTRG. 34110. 2  | 23  | 0. 39754 | 11. 52288818 | 1  |
| MSTRG. 34129. 1  | 159 | 0. 34166 | 10. 50970459 | 1  |
| MSTRG. 34130. 3  | 68  | 0. 39587 | 4. 734802246 | 1  |

|                  |      |          |              |    |
|------------------|------|----------|--------------|----|
| MSTRG. 34130. 1  | 68   | 0. 38047 | 4. 734802246 | 1  |
| MSTRG. 34130. 2  | 68   | 0. 38047 | 4. 734802246 | 1  |
| MSTRG. 34131. 1  | 68   | 0. 30031 | 4. 734802246 | 1  |
| MSTRG. 34131. 2  | 68   | 0. 35583 | 4. 734802246 | 1  |
| MSTRG. 34130. 4  | 84   | 0. 31781 | 10. 99395752 | 1  |
| MSTRG. 34130. 5  | 68   | 0. 39587 | 4. 734802246 | 1  |
| MSTRG. 34135. 3  | 58   | 0. 30682 | 8. 93560791  | -1 |
| MSTRG. 34135. 1  | 59   | 0. 30982 | 8. 93560791  | -1 |
| MSTRG. 34135. 2  | 59   | 0. 30982 | 8. 93560791  | -1 |
| MSTRG. 34135. 4  | 59   | 0. 33852 | 8. 93560791  | -1 |
| MSTRG. 34136. 1  | 86   | 0. 3889  | 9. 434387207 | 1  |
| MSTRG. 34135. 5  | 59   | 0. 32851 | 8. 93560791  | -1 |
| MSTRG. 34137. 3  | 78   | 0. 41334 | 8. 905578613 | 1  |
| MSTRG. 34137. 1  | 78   | 0. 41334 | 8. 905578613 | 1  |
| MSTRG. 34137. 2  | 78   | 0. 41334 | 8. 905578613 | 1  |
| MSTRG. 34135. 6  | 70   | 0. 34211 | 11. 92120361 | 1  |
| MSTRG. 34133. 1  | 38   | 0. 28335 | 8. 683166504 | -1 |
| MSTRG. 34146. 1  | 1066 | 0. 46818 | 6. 90435791  | -1 |
| MSTRG. 34149. 1  | 98   | 0. 31037 | 8. 18182373  | 1  |
| MSTRG. 34152. 1  | 39   | 0. 33783 | 4. 192565918 | 1  |
| MSTRG. 34153. 1  | 59   | 0. 44773 | 10. 20733643 | -1 |
| MSTRG. 34185. 7  | 149  | 0. 31381 | 9. 160461426 | 1  |
| MSTRG. 34185. 8  | 64   | 0. 38374 | 6. 698425293 | 1  |
| MSTRG. 34185. 10 | 77   | 0. 31464 | 4. 906188965 | 1  |
| MSTRG. 34185. 9  | 55   | 0. 42499 | 4. 960144043 | 1  |
| MSTRG. 34185. 11 | 55   | 0. 39334 | 4. 929382324 | 1  |
| MSTRG. 34185. 12 | 55   | 0. 38812 | 4. 960144043 | 1  |
| MSTRG. 34185. 13 | 55   | 0. 43707 | 4. 960144043 | 1  |
| MSTRG. 34185. 15 | 168  | 0. 37701 | 9. 745178223 | 1  |
| MSTRG. 34185. 14 | 168  | 0. 43763 | 9. 893981934 | 1  |
| MSTRG. 34185. 16 | 55   | 0. 42642 | 4. 909240723 | 1  |
| MSTRG. 34185. 17 | 168  | 0. 35383 | 9. 745178223 | 1  |
| MSTRG. 34185. 18 | 168  | 0. 36742 | 9. 893981934 | 1  |
| MSTRG. 34185. 19 | 168  | 0. 4519  | 9. 745178223 | 1  |
| MSTRG. 34185. 20 | 55   | 0. 41205 | 4. 960144043 | 1  |
| MSTRG. 34185. 21 | 168  | 0. 39919 | 9. 745178223 | 1  |
| MSTRG. 34185. 22 | 168  | 0. 38635 | 9. 893981934 | 1  |
| MSTRG. 34185. 23 | 40   | 0. 44697 | 4. 433776855 | 1  |
| MSTRG. 34154. 1  | 69   | 0. 38614 | 10. 52496338 | 1  |
| MSTRG. 34155. 1  | 15   | 0. 41043 | 8. 000305176 | -1 |
| MSTRG. 34154. 2  | 69   | 0. 38437 | 10. 52496338 | 1  |
| MSTRG. 34161. 2  | 441  | 0. 40383 | 9. 561096191 | 1  |
| MSTRG. 34161. 3  | 441  | 0. 44985 | 8. 90826416  | 1  |
| MSTRG. 34159. 1  | 68   | 0. 39587 | 4. 734802246 | 1  |
| MSTRG. 34164. 1  | 83   | 0. 42025 | 9. 914978027 | 1  |
| MSTRG. 34164. 2  | 83   | 0. 42228 | 9. 250549316 | 1  |
| MSTRG. 34171. 2  | 353  | 0. 40583 | 5. 367370605 | 1  |
| MSTRG. 34171. 5  | 364  | 0. 3889  | 5. 377258301 | 1  |
| MSTRG. 34171. 6  | 353  | 0. 46128 | 5. 367370605 | 1  |
| MSTRG. 34174. 1  | 61   | 0. 39289 | 11. 85870361 | -1 |
| MSTRG. 34178. 1  | 32   | 0. 37053 | 7. 835021973 | 1  |
| MSTRG. 34183. 2  | 489  | 0. 4348  | 7. 994934082 | -1 |
| MSTRG. 34183. 3  | 482  | 0. 44419 | 8. 249572754 | -1 |
| MSTRG. 34183. 4  | 21   | 0. 35513 | 5. 274719238 | 1  |

|                 |      |          |              |    |
|-----------------|------|----------|--------------|----|
| MSTRG. 34190. 1 | 1021 | 0. 42644 | 6. 416442871 | 1  |
| MSTRG. 34190. 2 | 1024 | 0. 42644 | 6. 35369873  | 1  |
| MSTRG. 34190. 6 | 415  | 0. 48317 | 7. 159240723 | 1  |
| MSTRG. 34190. 9 | 357  | 0. 43952 | 4. 907287598 | 1  |
| MSTRG. 34169. 1 | 119  | 0. 2733  | 12. 00469971 | 1  |
| MSTRG. 34196. 1 | 84   | 0. 28037 | 8. 183410645 | 1  |
| MSTRG. 34198. 3 | 144  | 0. 47376 | 3. 923278809 | 1  |
| MSTRG. 34198. 4 | 135  | 0. 42531 | 3. 923278809 | 1  |
| MSTRG. 34206. 1 | 36   | 0. 34857 | 6. 030822754 | 1  |
| MSTRG. 34202. 1 | 69   | 0. 34755 | 9. 445739746 | 1  |
| MSTRG. 34209. 1 | 83   | 0. 37935 | 9. 842712402 | 1  |
| MSTRG. 34209. 2 | 59   | 0. 40657 | 9. 019592285 | 1  |
| MSTRG. 34210. 1 | 89   | 0. 36691 | 6. 005432129 | 1  |
| MSTRG. 34210. 2 | 62   | 0. 39612 | 10. 53192139 | -1 |
| MSTRG. 34219. 1 | 30   | 0. 37528 | 8. 020690918 | -1 |
| MSTRG. 34220. 1 | 5    | 0. 37483 | 5. 272766113 | 1  |
| MSTRG. 34219. 2 | 30   | 0. 37528 | 8. 020690918 | -1 |
| MSTRG. 34220. 2 | 5    | 0. 35399 | 5. 272766113 | 1  |
| MSTRG. 34220. 3 | 5    | 0. 34305 | 5. 272766113 | 1  |
| MSTRG. 34219. 3 | 45   | 0. 36485 | 6. 22845459  | -1 |
| MSTRG. 34225. 1 | 19   | 0. 27066 | 6. 492004395 | 1  |
| MSTRG. 34226. 1 | 53   | 0. 33845 | 9. 184265137 | 1  |
| MSTRG. 34235. 1 | 86   | 0. 47444 | 9. 736999512 | -1 |
| MSTRG. 34238. 1 | 0    | 0. 38655 | 0            | -1 |
| MSTRG. 34252. 1 | 161  | 0. 33075 | 10. 98529053 | -1 |
| MSTRG. 34252. 2 | 130  | 0. 33861 | 9. 686950684 | -1 |
| MSTRG. 34252. 3 | 86   | 0. 32179 | 9. 434387207 | 1  |
| MSTRG. 34252. 4 | 86   | 0. 32179 | 9. 434387207 | 1  |
| MSTRG. 34272. 1 | 120  | 0. 29452 | 7. 68572998  | 1  |
| MSTRG. 34272. 2 | 120  | 0. 29452 | 7. 68572998  | 1  |
| MSTRG. 34272. 4 | 120  | 0. 29857 | 7. 68572998  | 1  |
| MSTRG. 34272. 3 | 120  | 0. 29452 | 7. 68572998  | 1  |
| MSTRG. 34272. 6 | 120  | 0. 29452 | 7. 68572998  | 1  |
| MSTRG. 34272. 5 | 120  | 0. 29452 | 7. 68572998  | 1  |
| MSTRG. 34272. 7 | 120  | 0. 3032  | 7. 68572998  | 1  |
| MSTRG. 34272. 8 | 120  | 0. 29452 | 7. 68572998  | 1  |
| MSTRG. 34272. 9 | 120  | 0. 29727 | 7. 68572998  | 1  |
| MSTRG. 34293. 1 | 127  | 0. 32361 | 6. 863586426 | 1  |
| MSTRG. 34294. 1 | 190  | 0. 36053 | 9. 72857666  | 1  |
| MSTRG. 34294. 2 | 190  | 0. 34878 | 9. 565002441 | 1  |
| MSTRG. 34295. 1 | 132  | 0. 29772 | 8. 969177246 | 1  |
| MSTRG. 34295. 2 | 62   | 0. 29772 | 10. 36273193 | 1  |
| MSTRG. 34295. 4 | 61   | 0. 3094  | 6. 518371582 | 1  |
| MSTRG. 34295. 3 | 61   | 0. 31264 | 6. 518371582 | 1  |
| MSTRG. 34295. 5 | 66   | 0. 35841 | 11. 74737549 | 1  |
| MSTRG. 34294. 3 | 227  | 0. 28396 | 9. 504699707 | 1  |
| MSTRG. 34294. 4 | 122  | 0. 28648 | 7. 034973145 | 1  |
| MSTRG. 34294. 6 | 122  | 0. 28243 | 7. 034973145 | 1  |
| MSTRG. 34294. 5 | 122  | 0. 28648 | 7. 034973145 | 1  |
| MSTRG. 34295. 6 | 119  | 0. 31398 | 9. 354919434 | 1  |
| MSTRG. 34294. 8 | 114  | 0. 34453 | 6. 635437012 | -1 |
| MSTRG. 34294. 7 | 122  | 0. 29857 | 7. 034973145 | 1  |
| MSTRG. 34294. 9 | 122  | 0. 28648 | 7. 034973145 | 1  |
| MSTRG. 34295. 7 | 20   | 0. 28914 | 12. 00006104 | 1  |

|                  |     |          |              |    |
|------------------|-----|----------|--------------|----|
| MSTRG. 34294. 10 | 90  | 0. 29705 | 9. 588806152 | 1  |
| MSTRG. 34294. 11 | 83  | 0. 3319  | 8. 890808105 | 1  |
| MSTRG. 34298. 1  | 32  | 0. 45841 | 4. 957702637 | -1 |
| MSTRG. 34298. 2  | 31  | 0. 47934 | 4. 957702637 | -1 |
| MSTRG. 34299. 1  | 55  | 0. 49052 | 9. 510559082 | 1  |
| MSTRG. 34282. 1  | 51  | 0. 39215 | 4. 655822754 | 1  |
| MSTRG. 34283. 1  | 0   | 0. 33168 | 0            | -1 |
| MSTRG. 34284. 1  | 52  | 0. 42752 | 11. 00006104 | 1  |
| MSTRG. 34287. 1  | 47  | 0. 326   | 8. 508850098 | 1  |
| MSTRG. 34300. 1  | 71  | 0. 44791 | 8. 028869629 | -1 |
| MSTRG. 34302. 1  | 83  | 0. 41843 | 9. 250549316 | 1  |
| MSTRG. 34303. 1  | 58  | 0. 4349  | 9. 183410645 | 1  |
| MSTRG. 34314. 1  | 40  | 0. 45676 | 5. 756652832 | -1 |
| MSTRG. 34314. 3  | 91  | 0. 3777  | 6. 965637207 | 1  |
| MSTRG. 34314. 4  | 111 | 0. 30309 | 10. 54327393 | 1  |
| MSTRG. 34314. 2  | 111 | 0. 2952  | 10. 54327393 | 1  |
| MSTRG. 34315. 1  | 193 | 0. 28419 | 9. 358947754 | 1  |
| MSTRG. 34315. 2  | 168 | 0. 28063 | 12. 2678833  | 1  |
| MSTRG. 34315. 3  | 304 | 0. 26247 | 12. 37432861 | 1  |
| MSTRG. 34315. 4  | 176 | 0. 29498 | 12. 10272217 | 1  |
| MSTRG. 34317. 2  | 467 | 0. 31593 | 9. 078308105 | 1  |
| MSTRG. 34317. 3  | 172 | 0. 35719 | 5. 820617676 | 1  |
| MSTRG. 34315. 5  | 192 | 0. 29639 | 9. 953674316 | 1  |
| MSTRG. 34315. 6  | 163 | 0. 34964 | 8. 441589355 | 1  |
| MSTRG. 34315. 7  | 90  | 0. 28584 | 5. 089904785 | 1  |
| MSTRG. 34315. 8  | 139 | 0. 37867 | 8. 836975098 | 1  |
| MSTRG. 34315. 10 | 55  | 0. 37578 | 4. 633850098 | 1  |
| MSTRG. 34315. 11 | 168 | 0. 28719 | 9. 667297363 | 1  |
| MSTRG. 34315. 9  | 168 | 0. 3568  | 9. 667297363 | 1  |
| MSTRG. 34304. 1  | 30  | 0. 327   | 8. 49420166  | -1 |
| MSTRG. 34305. 1  | 85  | 0. 29189 | 8. 591247559 | 1  |
| MSTRG. 34306. 2  | 12  | 0. 27327 | 5. 270568848 | 1  |
| MSTRG. 34306. 1  | 12  | 0. 31335 | 5. 270568848 | 1  |
| MSTRG. 34307. 1  | 29  | 0. 29995 | 4. 944641113 | 1  |
| MSTRG. 34307. 2  | 29  | 0. 3039  | 5. 478210449 | 1  |
| MSTRG. 34308. 1  | 12  | 0. 28932 | 6. 487731934 | 1  |
| MSTRG. 34321. 1  | 184 | 0. 4404  | 9. 085510254 | 1  |
| MSTRG. 34328. 1  | 38  | 0. 4194  | 5. 982849121 | 1  |
| MSTRG. 34330. 1  | 51  | 0. 42396 | 10. 01275635 | 1  |
| MSTRG. 34327. 1  | 20  | 0. 41137 | 9. 692199707 | 1  |
| MSTRG. 34334. 2  | 88  | 0. 40545 | 10. 01422119 | 1  |
| MSTRG. 34346. 1  | 60  | 0. 43167 | 7. 869689941 | 1  |
| MSTRG. 34346. 2  | 90  | 0. 41215 | 10. 65814209 | 1  |
| MSTRG. 34346. 3  | 78  | 0. 42612 | 8. 905578613 | 1  |
| MSTRG. 34346. 4  | 78  | 0. 42612 | 8. 905578613 | 1  |
| MSTRG. 34342. 1  | 21  | 0. 34561 | 8. 537902832 | -1 |
| MSTRG. 34342. 2  | 21  | 0. 34561 | 8. 537902832 | -1 |
| MSTRG. 34351. 1  | 91  | 0. 37409 | 6. 964538574 | 1  |
| MSTRG. 34351. 3  | 55  | 0. 46724 | 9. 510559082 | 1  |
| MSTRG. 34351. 2  | 55  | 0. 35429 | 9. 033996582 | 1  |
| MSTRG. 34351. 4  | 91  | 0. 41161 | 6. 964538574 | 1  |
| MSTRG. 34351. 5  | 55  | 0. 37739 | 9. 033996582 | 1  |
| MSTRG. 34351. 6  | 38  | 0. 461   | 5. 747497559 | -1 |
| MSTRG. 34351. 7  | 38  | 0. 44738 | 5. 747497559 | -1 |



|                 |     |         |             |    |
|-----------------|-----|---------|-------------|----|
| MSTRG. 34351.8  | 52  | 0.47933 | 9.033996582 | -1 |
| MSTRG. 34349.1  | 49  | 0.42481 | 9.972351074 | 1  |
| MSTRG. 34352.1  | 69  | 0.32184 | 10.52496338 | 1  |
| MSTRG. 34352.2  | 52  | 0.38985 | 11.00006104 | 1  |
| MSTRG. 34369.1  | 473 | 0.29772 | 6.590515137 | 1  |
| MSTRG. 34369.2  | 132 | 0.29772 | 6.942810059 | 1  |
| MSTRG. 34369.3  | 121 | 0.29772 | 6.807067871 | 1  |
| MSTRG. 34369.4  | 132 | 0.33851 | 6.942810059 | 1  |
| MSTRG. 34369.5  | 121 | 0.29772 | 6.807067871 | 1  |
| MSTRG. 34369.7  | 132 | 0.29867 | 6.942810059 | 1  |
| MSTRG. 34369.8  | 530 | 0.37705 | 6.670471191 | 1  |
| MSTRG. 34369.9  | 103 | 0.30981 | 6.272399902 | 1  |
| MSTRG. 34369.10 | 212 | 0.38771 | 9.481750488 | 1  |
| MSTRG. 34369.11 | 283 | 0.4575  | 6.18951416  | 1  |
| MSTRG. 34356.1  | 52  | 0.30709 | 10.27728271 | 1  |
| MSTRG. 34356.2  | 49  | 0.38986 | 9.972351074 | 1  |
| MSTRG. 34357.1  | 52  | 0.37443 | 10.36431885 | 1  |
| MSTRG. 34355.1  | 190 | 0.45916 | 6.587585449 | 1  |
| MSTRG. 34363.2  | 131 | 0.35191 | 9.934631348 | 1  |
| MSTRG. 34363.3  | 567 | 0.44116 | 7.680480957 | 1  |
| MSTRG. 34365.2  | 197 | 0.27911 | 7.911193848 | 1  |
| MSTRG. 34365.3  | 142 | 0.2785  | 4.808898926 | 1  |
| MSTRG. 34365.4  | 50  | 0.45023 | 12.47784424 | -1 |
| MSTRG. 34361.1  | 84  | 0.35824 | 11.20684814 | 1  |
| MSTRG. 34373.1  | 135 | 0.38976 | 9.430114746 | -1 |
| MSTRG. 34373.2  | 169 | 0.40197 | 9.440979004 | -1 |
| MSTRG. 34373.3  | 135 | 0.38976 | 9.430114746 | -1 |
| MSTRG. 34374.1  | 28  | 0.39636 | 9.624694824 | 1  |
| MSTRG. 34374.2  | 28  | 0.38427 | 9.624694824 | 1  |
| MSTRG. 34374.3  | 28  | 0.41002 | 9.624694824 | 1  |
| MSTRG. 34375.1  | 87  | 0.35024 | 9.39654541  | 1  |
| MSTRG. 34375.2  | 110 | 0.37814 | 9.957214355 | 1  |
| MSTRG. 34373.4  | 91  | 0.36265 | 9.161682129 | 1  |
| MSTRG. 34373.5  | 91  | 0.36265 | 9.161682129 | 1  |
| MSTRG. 34376.5  | 78  | 0.40121 | 8.905578613 | 1  |
| MSTRG. 34376.2  | 40  | 0.41869 | 7.999938965 | 1  |
| MSTRG. 34376.4  | 78  | 0.38319 | 8.905578613 | 1  |
| MSTRG. 34376.3  | 78  | 0.38319 | 8.905578613 | 1  |
| MSTRG. 34376.6  | 85  | 0.36035 | 9.39642334  | 1  |
| MSTRG. 34376.7  | 78  | 0.38319 | 8.905578613 | 1  |
| MSTRG. 34376.1  | 78  | 0.38967 | 8.905578613 | 1  |
| MSTRG. 34383.1  | 19  | 0.27231 | 6.492004395 | 1  |
| MSTRG. 34383.2  | 19  | 0.27934 | 6.492004395 | 1  |
| MSTRG. 34383.3  | 5   | 0.32348 | 5.272766113 | 1  |
| MSTRG. 34384.1  | 47  | 0.29919 | 6.812561035 | -1 |
| MSTRG. 34389.1  | 52  | 0.43328 | 11.00006104 | 1  |
| MSTRG. 34390.1  | 67  | 0.33971 | 9.096984863 | 1  |
| MSTRG. 34391.1  | 52  | 0.3797  | 12.00421143 | 1  |
| MSTRG. 34393.1  | 141 | 0.31035 | 10.01812744 | 1  |
| MSTRG. 34395.2  | 373 | 0.46135 | 5.609436035 | -1 |
| MSTRG. 34394.1  | 166 | 0.45465 | 4.936340332 | 1  |
| MSTRG. 34394.3  | 140 | 0.39511 | 5.385070801 | 1  |
| MSTRG. 34400.1  | 67  | 0.43452 | 9.969665527 | -1 |
| MSTRG. 34401.2  | 53  | 0.38359 | 4.749694824 | 1  |

|                  |     |          |               |    |
|------------------|-----|----------|---------------|----|
| MSTRG. 34401. 1  | 22  | 0. 40676 | 5. 746154785  | 1  |
| MSTRG. 34402. 1  | 29  | 0. 36901 | 8. 3644440918 | 1  |
| MSTRG. 34402. 2  | 29  | 0. 36901 | 8. 3644440918 | 1  |
| MSTRG. 34401. 3  | 44  | 0. 40849 | 8. 045227051  | -1 |
| MSTRG. 34402. 3  | 29  | 0. 37995 | 8. 3644440918 | 1  |
| MSTRG. 34400. 2  | 117 | 0. 38188 | 9. 453674316  | 1  |
| MSTRG. 34411. 1  | 48  | 0. 4605  | 8. 27520752   | 1  |
| MSTRG. 34414. 1  | 170 | 0. 32495 | 6. 72088623   | 1  |
| MSTRG. 34414. 2  | 170 | 0. 36036 | 6. 72088623   | 1  |
| MSTRG. 34414. 3  | 170 | 0. 36036 | 6. 72088623   | 1  |
| MSTRG. 34416. 1  | 42  | 0. 35932 | 10. 83441162  | 1  |
| MSTRG. 34435. 10 | 515 | 0. 40399 | 8. 298400879  | 1  |
| MSTRG. 34435. 7  | 390 | 0. 34404 | 6. 793395996  | 1  |
| MSTRG. 34435. 8  | 495 | 0. 40399 | 8. 192443848  | 1  |
| MSTRG. 34435. 9  | 515 | 0. 40399 | 8. 298400879  | 1  |
| MSTRG. 34435. 2  | 515 | 0. 40399 | 8. 298400879  | 1  |
| MSTRG. 34418. 1  | 0   | 0. 32013 | 0             | -1 |
| MSTRG. 34420. 1  | 30  | 0. 33782 | 7. 834777832  | 1  |
| MSTRG. 34421. 1  | 50  | 0. 30152 | 11. 83428955  | 1  |
| MSTRG. 34422. 1  | 0   | 0. 30991 | 0             | -1 |
| MSTRG. 34427. 1  | 165 | 0. 46781 | 4. 566345215  | 1  |
| MSTRG. 34427. 2  | 165 | 0. 45907 | 4. 566345215  | 1  |
| MSTRG. 34427. 3  | 165 | 0. 45907 | 4. 566345215  | 1  |
| MSTRG. 34429. 2  | 26  | 0. 45877 | 11. 12213135  | 1  |
| MSTRG. 34429. 1  | 83  | 0. 33901 | 9. 726623535  | 1  |
| MSTRG. 34438. 1  | 26  | 0. 46454 | 11. 75421143  | 1  |
| MSTRG. 34439. 1  | 45  | 0. 4817  | 6. 810974121  | -1 |
| MSTRG. 34449. 1  | 26  | 0. 45357 | 10. 5647583   | 1  |
| MSTRG. 34449. 2  | 83  | 0. 32646 | 9. 515563965  | 1  |
| MSTRG. 34449. 3  | 111 | 0. 38919 | 9. 677307129  | 1  |
| MSTRG. 34449. 4  | 55  | 0. 47195 | 9. 510559082  | 1  |
| MSTRG. 34449. 5  | 83  | 0. 30877 | 9. 515563965  | 1  |
| MSTRG. 34449. 6  | 83  | 0. 37006 | 9. 515563965  | 1  |
| MSTRG. 34449. 7  | 83  | 0. 37874 | 9. 515563965  | 1  |
| MSTRG. 34449. 9  | 83  | 0. 31437 | 9. 515563965  | 1  |
| MSTRG. 34449. 8  | 83  | 0. 31437 | 9. 515563965  | 1  |
| MSTRG. 34449. 10 | 83  | 0. 36513 | 9. 515563965  | 1  |
| MSTRG. 34446. 1  | 44  | 0. 40034 | 9. 609558105  | 1  |
| MSTRG. 34446. 2  | 0   | 0. 41804 | 0             | -1 |
| MSTRG. 34452. 1  | 66  | 0. 32927 | 10. 66656494  | 1  |
| MSTRG. 34452. 2  | 66  | 0. 40041 | 10. 66656494  | 1  |
| MSTRG. 34458. 1  | 80  | 0. 44838 | 7. 847229004  | 1  |
| MSTRG. 34460. 1  | 55  | 0. 46463 | 9. 510559082  | 1  |
| MSTRG. 34455. 1  | 63  | 0. 36476 | 5. 585754395  | 1  |
| MSTRG. 34455. 2  | 63  | 0. 34541 | 5. 585754395  | 1  |
| MSTRG. 34467. 1  | 66  | 0. 35544 | 9. 940979004  | 1  |
| MSTRG. 34471. 1  | 0   | 0. 28    | 0             | -1 |
| MSTRG. 34478. 1  | 92  | 0. 31037 | 7. 81842041   | 1  |
| MSTRG. 34482. 3  | 39  | 0. 39297 | 9. 983947754  | 1  |
| MSTRG. 34481. 1  | 46  | 0. 39044 | 9. 894104004  | 1  |
| MSTRG. 34486. 1  | 38  | 0. 43098 | 4. 075378418  | -1 |
| MSTRG. 34489. 1  | 95  | 0. 34587 | 10. 00079346  | 1  |
| MSTRG. 34501. 1  | 17  | 0. 37725 | 5. 194152832  | 1  |
| MSTRG. 34505. 1  | 574 | 0. 46904 | 8. 696838379  | 1  |

|                  |     |          |              |    |
|------------------|-----|----------|--------------|----|
| MSTRG. 34511. 1  | 86  | 0. 32885 | 9. 434387207 | 1  |
| MSTRG. 34511. 2  | 86  | 0. 33529 | 9. 434387207 | 1  |
| MSTRG. 34511. 3  | 86  | 0. 33529 | 9. 434387207 | 1  |
| MSTRG. 34511. 4  | 134 | 0. 37283 | 9. 686950684 | -1 |
| MSTRG. 34512. 1  | 60  | 0. 42305 | 7. 869689941 | 1  |
| MSTRG. 34513. 1  | 40  | 0. 46496 | 7. 999938965 | 1  |
| MSTRG. 34514. 1  | 19  | 0. 36665 | 3. 877380371 | -1 |
| MSTRG. 34515. 1  | 32  | 0. 26    | 3. 503723145 | 1  |
| MSTRG. 34519. 2  | 78  | 0. 376   | 8. 905578613 | 1  |
| MSTRG. 34519. 1  | 87  | 0. 35243 | 10. 14666748 | 1  |
| MSTRG. 34519. 3  | 78  | 0. 43948 | 8. 905578613 | 1  |
| MSTRG. 34519. 4  | 78  | 0. 43948 | 8. 905578613 | 1  |
| MSTRG. 34519. 5  | 109 | 0. 38188 | 10. 03448486 | 1  |
| MSTRG. 34519. 6  | 87  | 0. 37956 | 10. 14666748 | 1  |
| MSTRG. 34520. 1  | 67  | 0. 32188 | 8. 769714355 | 1  |
| MSTRG. 34521. 1  | 23  | 0. 33882 | 9. 303649902 | 1  |
| MSTRG. 34519. 7  | 78  | 0. 43948 | 8. 905578613 | 1  |
| MSTRG. 34524. 1  | 19  | 0. 38968 | 7. 999816895 | -1 |
| MSTRG. 34524. 2  | 76  | 0. 42411 | 11. 6005249  | 1  |
| MSTRG. 34524. 3  | 76  | 0. 45092 | 11. 6005249  | 1  |
| MSTRG. 34524. 4  | 76  | 0. 47764 | 11. 6005249  | 1  |
| MSTRG. 34524. 5  | 76  | 0. 45105 | 11. 6005249  | 1  |
| MSTRG. 34528. 2  | 44  | 0. 32513 | 11. 31182861 | -1 |
| MSTRG. 34528. 1  | 100 | 0. 30527 | 5. 535827637 | 1  |
| MSTRG. 34529. 1  | 49  | 0. 35455 | 9. 972351074 | 1  |
| MSTRG. 34537. 1  | 121 | 0. 31917 | 6. 253234863 | -1 |
| MSTRG. 34537. 3  | 75  | 0. 37206 | 8. 969787598 | 1  |
| MSTRG. 34537. 2  | 121 | 0. 36753 | 6. 253234863 | -1 |
| MSTRG. 34537. 4  | 121 | 0. 2908  | 6. 253234863 | -1 |
| MSTRG. 34532. 1  | 26  | 0. 33845 | 9. 693908691 | 1  |
| MSTRG. 34554. 1  | 282 | 0. 33743 | 8. 810974121 | 1  |
| MSTRG. 34556. 1  | 235 | 0. 38027 | 6. 42364502  | -1 |
| MSTRG. 34554. 2  | 256 | 0. 33974 | 8. 24029541  | 1  |
| MSTRG. 34557. 2  | 91  | 0. 38277 | 8. 934509277 | -1 |
| MSTRG. 34557. 1  | 181 | 0. 41631 | 9. 647888184 | 1  |
| MSTRG. 34557. 4  | 647 | 0. 44673 | 8. 623718262 | 1  |
| MSTRG. 34550. 1  | 19  | 0. 34323 | 6. 492004395 | 1  |
| MSTRG. 34550. 2  | 5   | 0. 36939 | 5. 272766113 | 1  |
| MSTRG. 34561. 1  | 0   | 0. 26014 | 0            | -1 |
| MSTRG. 34561. 2  | 0   | 0. 33168 | 0            | -1 |
| MSTRG. 34563. 1  | 52  | 0. 32714 | 6. 012268066 | 1  |
| MSTRG. 34621. 2  | 164 | 0. 30245 | 9. 79876709  | 1  |
| MSTRG. 34621. 1  | 310 | 0. 34247 | 10. 50823975 | 1  |
| MSTRG. 34621. 3  | 237 | 0. 30253 | 10. 24212646 | 1  |
| MSTRG. 34621. 4  | 114 | 0. 3166  | 10. 14556885 | 1  |
| MSTRG. 34621. 5  | 114 | 0. 27911 | 9. 382019043 | 1  |
| MSTRG. 34622. 1  | 162 | 0. 27814 | 11. 92254639 | 1  |
| MSTRG. 34621. 8  | 217 | 0. 27516 | 11. 80853271 | 1  |
| MSTRG. 34621. 6  | 217 | 0. 29392 | 11. 80853271 | 1  |
| MSTRG. 34621. 7  | 70  | 0. 24708 | 10. 80657959 | 1  |
| MSTRG. 34621. 11 | 217 | 0. 26958 | 11. 80853271 | 1  |
| MSTRG. 34621. 12 | 127 | 0. 26522 | 11. 64471436 | -1 |
| MSTRG. 34621. 10 | 217 | 0. 30601 | 11. 80853271 | 1  |
| MSTRG. 34621. 9  | 217 | 0. 24708 | 11. 80853271 | 1  |

|                  |     |          |              |    |
|------------------|-----|----------|--------------|----|
| MSTRG. 34621. 13 | 314 | 0. 27484 | 12. 07952881 | 1  |
| MSTRG. 34621. 14 | 217 | 0. 30778 | 11. 80853271 | 1  |
| MSTRG. 34621. 15 | 217 | 0. 33666 | 11. 80853271 | 1  |
| MSTRG. 34621. 17 | 217 | 0. 31616 | 11. 80853271 | 1  |
| MSTRG. 34621. 16 | 84  | 0. 26089 | 12. 0010376  | 1  |
| MSTRG. 34621. 18 | 217 | 0. 33961 | 11. 80853271 | 1  |
| MSTRG. 34622. 3  | 327 | 0. 25669 | 11. 98602295 | 1  |
| MSTRG. 34622. 4  | 311 | 0. 26214 | 11. 47894287 | 1  |
| MSTRG. 34622. 5  | 316 | 0. 27082 | 11. 41802979 | 1  |
| MSTRG. 34622. 6  | 222 | 0. 28374 | 11. 91766357 | 1  |
| MSTRG. 34622. 7  | 218 | 0. 26605 | 12. 10345459 | -1 |
| MSTRG. 34622. 8  | 327 | 0. 25669 | 11. 98602295 | 1  |
| MSTRG. 34622. 10 | 714 | 0. 29392 | 11. 78521729 | -1 |
| MSTRG. 34622. 9  | 640 | 0. 2964  | 11. 87762451 | 1  |
| MSTRG. 34622. 11 | 325 | 0. 2446  | 11. 38092041 | 1  |
| MSTRG. 34622. 12 | 325 | 0. 25855 | 11. 38092041 | 1  |
| MSTRG. 34622. 13 | 325 | 0. 24212 | 11. 38092041 | 1  |
| MSTRG. 34622. 14 | 535 | 0. 2733  | 11. 49066162 | 1  |
| MSTRG. 34622. 15 | 327 | 0. 28539 | 11. 98602295 | 1  |
| MSTRG. 34622. 16 | 410 | 0. 2446  | 12. 07513428 | -1 |
| MSTRG. 34568. 1  | 83  | 0. 36855 | 9. 250549316 | 1  |
| MSTRG. 34568. 2  | 63  | 0. 38143 | 6. 15802002  | 1  |
| MSTRG. 34569. 1  | 80  | 0. 40181 | 8. 712341309 | 1  |
| MSTRG. 34570. 1  | 57  | 0. 41493 | 5. 519470215 | 1  |
| MSTRG. 34572. 1  | 58  | 0. 42625 | 7. 656677246 | 1  |
| MSTRG. 34574. 1  | 7   | 0. 27885 | 5. 272766113 | 1  |
| MSTRG. 34575. 1  | 57  | 0. 32608 | 9. 184265137 | 1  |
| MSTRG. 34576. 1  | 5   | 0. 3488  | 5. 272766113 | 1  |
| MSTRG. 34579. 2  | 264 | 0. 37964 | 4. 017150879 | 1  |
| MSTRG. 34580. 1  | 24  | 0. 44866 | 3. 665710449 | -1 |
| MSTRG. 34583. 1  | 84  | 0. 33722 | 9. 945129395 | 1  |
| MSTRG. 34583. 2  | 106 | 0. 30981 | 9. 807922363 | 1  |
| MSTRG. 34587. 1  | 0   | 0. 28324 | 0            | -1 |
| MSTRG. 34592. 2  | 69  | 0. 45347 | 12. 31158447 | 1  |
| MSTRG. 34592. 1  | 76  | 0. 43069 | 12. 65960693 | -1 |
| MSTRG. 34592. 3  | 76  | 0. 43069 | 12. 65960693 | -1 |
| MSTRG. 34592. 4  | 50  | 0. 45358 | 12. 70611572 | -1 |
| MSTRG. 34592. 5  | 74  | 0. 39626 | 12. 65899658 | -1 |
| MSTRG. 34595. 7  | 114 | 0. 34111 | 11. 06304932 | 1  |
| MSTRG. 34595. 3  | 114 | 0. 36821 | 11. 06304932 | 1  |
| MSTRG. 34595. 5  | 114 | 0. 36821 | 11. 06304932 | 1  |
| MSTRG. 34595. 6  | 114 | 0. 36821 | 11. 06304932 | 1  |
| MSTRG. 34595. 8  | 13  | 0. 38181 | 11. 52459717 | 1  |
| MSTRG. 34595. 2  | 114 | 0. 36981 | 10. 87286377 | 1  |
| MSTRG. 34595. 4  | 21  | 0. 35775 | 11. 09698486 | 1  |
| MSTRG. 34595. 9  | 114 | 0. 36821 | 11. 06304932 | 1  |
| MSTRG. 34595. 10 | 13  | 0. 38367 | 11. 52459717 | 1  |
| MSTRG. 34595. 11 | 13  | 0. 3976  | 11. 52459717 | 1  |
| MSTRG. 34595. 12 | 21  | 0. 35775 | 11. 09698486 | 1  |
| MSTRG. 34595. 13 | 114 | 0. 36981 | 10. 87286377 | 1  |
| MSTRG. 34595. 14 | 13  | 0. 37093 | 11. 52459717 | 1  |
| MSTRG. 34595. 15 | 13  | 0. 36981 | 11. 52459717 | 1  |
| MSTRG. 34595. 16 | 13  | 0. 3899  | 11. 52459717 | 1  |
| MSTRG. 34600. 1  | 40  | 0. 45021 | 4. 779968262 | 1  |

|                |     |         |             |    |
|----------------|-----|---------|-------------|----|
| MSTRG. 34601.2 | 42  | 0.46225 | 6.226745605 | -1 |
| MSTRG. 34601.3 | 42  | 0.45287 | 6.226745605 | -1 |
| MSTRG. 34601.1 | 42  | 0.44419 | 6.226745605 | -1 |
| MSTRG. 34603.1 | 21  | 0.42011 | 4.571960449 | 1  |
| MSTRG. 34600.2 | 83  | 0.32646 | 9.250549316 | 1  |
| MSTRG. 34600.3 | 83  | 0.33153 | 8.853088379 | 1  |
| MSTRG. 34606.1 | 83  | 0.37577 | 9.515563965 | 1  |
| MSTRG. 34600.5 | 83  | 0.39459 | 8.853088379 | 1  |
| MSTRG. 34600.4 | 83  | 0.33514 | 9.250549316 | 1  |
| MSTRG. 34600.6 | 80  | 0.46138 | 9.154846191 | 1  |
| MSTRG. 34597.1 | 52  | 0.41372 | 11.00006104 | 1  |
| MSTRG. 34612.1 | 116 | 0.33648 | 9.660217285 | 1  |
| MSTRG. 34613.1 | 53  | 0.37729 | 4.749694824 | 1  |
| MSTRG. 34611.1 | 53  | 0.35153 | 4.749694824 | 1  |
| MSTRG. 34616.1 | 114 | 0.42091 | 10.581604   | -1 |
| MSTRG. 34616.2 | 114 | 0.42091 | 10.581604   | -1 |
| MSTRG. 34616.3 | 66  | 0.39483 | 9.940979004 | 1  |
| MSTRG. 34616.4 | 114 | 0.38395 | 10.581604   | -1 |
| MSTRG. 34616.5 | 114 | 0.42091 | 10.581604   | -1 |
| MSTRG. 34615.1 | 14  | 0.36253 | 12.30108643 | -1 |
| MSTRG. 34619.1 | 100 | 0.40039 | 11.362854   | -1 |
| MSTRG. 34631.3 | 212 | 0.43263 | 3.995300293 | 1  |
| MSTRG. 34631.2 | 212 | 0.42738 | 4.032165527 | 1  |
| MSTRG. 34632.1 | 65  | 0.32603 | 6.551330566 | 1  |
| MSTRG. 34633.1 | 121 | 0.40194 | 11.58758545 | 1  |
| MSTRG. 34632.2 | 38  | 0.33354 | 11.29364014 | -1 |
| MSTRG. 34638.2 | 188 | 0.37763 | 11.253479   | 1  |
| MSTRG. 34638.1 | 188 | 0.46988 | 11.26165771 | 1  |
| MSTRG. 34637.2 | 845 | 0.40366 | 5.612121582 | 1  |
| MSTRG. 34637.4 | 845 | 0.38993 | 5.612121582 | 1  |
| MSTRG. 34653.1 | 163 | 0.44375 | 3.953186035 | 1  |
| MSTRG. 34655.2 | 79  | 0.34566 | 4.628356934 | 1  |
| MSTRG. 34655.1 | 76  | 0.33423 | 8.480895996 | 1  |
| MSTRG. 34656.2 | 54  | 0.41586 | 9.694274902 | 1  |
| MSTRG. 34656.1 | 73  | 0.35701 | 6.373718262 | 1  |
| MSTRG. 34657.1 | 29  | 0.42956 | 5.823303223 | 1  |
| MSTRG. 34660.1 | 29  | 0.47323 | 8.555603027 | -1 |
| MSTRG. 34661.1 | 35  | 0.41648 | 4.22052002  | 1  |
| MSTRG. 34653.2 | 76  | 0.36955 | 8.480895996 | 1  |
| MSTRG. 34664.1 | 121 | 0.41109 | 6.739562988 | 1  |
| MSTRG. 34666.1 | 41  | 0.29318 | 7.745544434 | 1  |
| MSTRG. 34671.1 | 141 | 0.34316 | 9.954162598 | 1  |
| MSTRG. 34646.1 | 34  | 0.36309 | 9.199523926 | 1  |
| MSTRG. 34647.3 | 121 | 0.46688 | 3.960021973 | 1  |
| MSTRG. 34647.1 | 124 | 0.48747 | 3.909973145 | 1  |
| MSTRG. 34675.3 | 111 | 0.42604 | 3.741027832 | -1 |
| MSTRG. 34675.2 | 111 | 0.43171 | 3.741027832 | -1 |
| MSTRG. 34675.4 | 109 | 0.42466 | 3.780334473 | -1 |
| MSTRG. 34675.5 | 105 | 0.4259  | 3.766540527 | -1 |
| MSTRG. 34681.2 | 360 | 0.30628 | 5.280822754 | 1  |
| MSTRG. 34681.4 | 360 | 0.44022 | 5.280822754 | 1  |
| MSTRG. 34681.3 | 360 | 0.35626 | 5.280822754 | 1  |
| MSTRG. 34682.7 | 360 | 0.39558 | 5.491516113 | 1  |
| MSTRG. 34682.9 | 360 | 0.40944 | 5.491516113 | 1  |

|                  |     |          |              |    |
|------------------|-----|----------|--------------|----|
| MSTRG. 34682. 11 | 360 | 0. 41534 | 5. 491516113 | 1  |
| MSTRG. 34682. 12 | 360 | 0. 41534 | 5. 491516113 | 1  |
| MSTRG. 34683. 1  | 57  | 0. 37938 | 10. 25604248 | -1 |
| MSTRG. 34707. 1  | 69  | 0. 43772 | 6. 893981934 | 1  |
| MSTRG. 34708. 1  | 90  | 0. 40232 | 7. 614562988 | -1 |
| MSTRG. 34712. 1  | 53  | 0. 40961 | 6. 47857666  | 1  |
| MSTRG. 34714. 1  | 45  | 0. 38078 | 7. 999084473 | 1  |
| MSTRG. 34715. 1  | 334 | 0. 46141 | 5. 776916504 | -1 |
| MSTRG. 34716. 1  | 23  | 0. 45165 | 9. 187805176 | 1  |
| MSTRG. 34717. 1  | 58  | 0. 35682 | 10. 01678467 | 1  |
| MSTRG. 34715. 2  | 343 | 0. 45388 | 6. 737976074 | 1  |
| MSTRG. 34715. 3  | 274 | 0. 46137 | 6. 031921387 | 1  |
| MSTRG. 34718. 1  | 104 | 0. 39582 | 4. 55657959  | 1  |
| MSTRG. 34719. 1  | 49  | 0. 38671 | 8. 292907715 | 1  |
| MSTRG. 34720. 1  | 82  | 0. 38312 | 5. 690612793 | 1  |
| MSTRG. 34721. 1  | 68  | 0. 3814  | 9. 79107666  | 1  |
| MSTRG. 34722. 1  | 63  | 0. 33063 | 9. 68939209  | 1  |
| MSTRG. 34715. 4  | 343 | 0. 39402 | 6. 126159668 | 1  |
| MSTRG. 34723. 1  | 23  | 0. 3667  | 8. 044616699 | 1  |
| MSTRG. 34723. 2  | 54  | 0. 33783 | 7. 901428223 | 1  |
| MSTRG. 34724. 1  | 343 | 0. 37887 | 9. 24005127  | 1  |
| MSTRG. 34725. 1  | 26  | 0. 31899 | 3. 584411621 | 1  |
| MSTRG. 34719. 2  | 57  | 0. 34146 | 9. 149719238 | 1  |
| MSTRG. 34717. 2  | 58  | 0. 40257 | 10. 01678467 | 1  |
| MSTRG. 34717. 3  | 58  | 0. 4715  | 10. 01678467 | 1  |
| MSTRG. 34726. 1  | 262 | 0. 38392 | 6. 368347168 | 1  |
| MSTRG. 34715. 5  | 208 | 0. 45794 | 5. 624084473 | -1 |
| MSTRG. 34727. 1  | 63  | 0. 35287 | 4. 112365723 | -1 |
| MSTRG. 34687. 1  | 75  | 0. 29998 | 9. 897766113 | 1  |
| MSTRG. 34689. 2  | 80  | 0. 43012 | 10. 293396   | 1  |
| MSTRG. 34690. 2  | 500 | 0. 34156 | 6. 505187988 | 1  |
| MSTRG. 34692. 1  | 16  | 0. 43132 | 5. 752258301 | 1  |
| MSTRG. 34701. 1  | 95  | 0. 39699 | 9. 696105957 | 1  |
| MSTRG. 34702. 1  | 131 | 0. 43344 | 5. 944763184 | 1  |
| MSTRG. 34729. 1  | 138 | 0. 41216 | 10. 63775635 | 1  |
| MSTRG. 34743. 1  | 96  | 0. 34848 | 9. 579040527 | 1  |
| MSTRG. 34743. 2  | 96  | 0. 40669 | 9. 579040527 | 1  |
| MSTRG. 34744. 2  | 297 | 0. 47439 | 4. 886047363 | 1  |
| MSTRG. 34744. 3  | 307 | 0. 47249 | 5. 24420166  | 1  |
| MSTRG. 34744. 4  | 291 | 0. 48652 | 4. 91583252  | 1  |
| MSTRG. 34744. 5  | 570 | 0. 44365 | 5. 781799316 | 1  |
| MSTRG. 34751. 1  | 238 | 0. 31894 | 5. 307434082 | 1  |
| MSTRG. 34755. 2  | 539 | 0. 43132 | 4. 761413574 | 1  |
| MSTRG. 34755. 1  | 669 | 0. 45986 | 4. 782653809 | 1  |
| MSTRG. 34761. 2  | 184 | 0. 47346 | 5. 615661621 | -1 |
| MSTRG. 34763. 2  | 389 | 0. 43512 | 6. 708557129 | 1  |
| MSTRG. 34764. 1  | 96  | 0. 39361 | 9. 384216309 | 1  |
| MSTRG. 34771. 9  | 114 | 0. 36821 | 10. 87286377 | 1  |
| MSTRG. 34771. 13 | 114 | 0. 38367 | 10. 87286377 | 1  |
| MSTRG. 34778. 1  | 114 | 0. 36821 | 10. 69244385 | 1  |
| MSTRG. 34778. 3  | 114 | 0. 37921 | 10. 87286377 | 1  |
| MSTRG. 34778. 4  | 114 | 0. 37921 | 10. 87286377 | 1  |
| MSTRG. 34778. 5  | 114 | 0. 38367 | 10. 69244385 | 1  |
| MSTRG. 34778. 6  | 114 | 0. 38367 | 10. 69244385 | 1  |

| coding_probability | label     |
|--------------------|-----------|
| 0.43947            | noncoding |
| 0.083571           | noncoding |
| 0.0873591          | noncoding |
| 0.72401            | coding    |
| 0.0694934          | noncoding |
| 0.999933           | coding    |
| 0.279463           | noncoding |
| 0.0539043          | noncoding |
| 1                  | coding    |
| 0.999959           | coding    |
| 0.477182           | noncoding |
| 0.208052           | noncoding |
| 0.19386            | noncoding |
| 1                  | coding    |
| 1                  | coding    |
| 0.999999           | coding    |
| 1                  | coding    |
| 0.999881           | coding    |
| 1                  | coding    |
| 0.999993           | coding    |
| 0.934215           | coding    |
| 0.829377           | coding    |
| 1                  | coding    |
| 0.81872            | coding    |
| 0.758752           | coding    |
| 0.987051           | coding    |
| 0.107095           | noncoding |
| 0.417751           | noncoding |
| 0.764007           | coding    |

|           |           |
|-----------|-----------|
| 0.17939   | noncoding |
| 0.0461449 | noncoding |
| 0.434383  | noncoding |
| 0.779852  | coding    |
| 0.980443  | coding    |
| 0.24338   | noncoding |
| 0.0971334 | noncoding |
| 0.0715293 | noncoding |
| 1         | coding    |
| 0.248777  | noncoding |
| 0.999992  | coding    |
| 0.184304  | noncoding |
| 1         | coding    |
| 0.999765  | coding    |
| 0.999369  | coding    |
| 0.0395802 | noncoding |
| 1         | coding    |
| 0.416003  | noncoding |
| 0.0287351 | noncoding |
| 0.0543857 | noncoding |
| 0.037944  | noncoding |
| 0.161793  | noncoding |
| 0.0989945 | noncoding |
| 0.0574046 | noncoding |
| 0.963923  | coding    |
| 0.0917063 | noncoding |
| 0.071765  | noncoding |
| 0.403951  | noncoding |
| 0.0456876 | noncoding |
| 0.171913  | noncoding |
| 1         | coding    |
| 0.0258648 | noncoding |
| 1         | coding    |
| 0.0443178 | noncoding |
| 0.488776  | noncoding |
| 0.0798721 | noncoding |
| 0.0886923 | noncoding |
| 1         | coding    |



|           |           |
|-----------|-----------|
| 1         | coding    |
| 0.153412  | noncoding |
| 0.495518  | noncoding |
| 0.264345  | noncoding |
| 0.0426876 | noncoding |
| 1         | coding    |
| 0.0363683 | noncoding |
| 1         | coding    |
| 1         | coding    |
| 0.147613  | noncoding |
| 0.991349  | coding    |
| 0.257069  | noncoding |
| 0.995866  | coding    |
| 0.0325868 | noncoding |
| 0.0188313 | noncoding |
| 0.763092  | coding    |
| 0.120017  | noncoding |
| 0.0989736 | noncoding |
| 0.111413  | noncoding |
| 0.0883135 | noncoding |
| 0.0461153 | noncoding |
| 0.628745  | coding    |
| 0.0253381 | noncoding |
| 0.0841486 | noncoding |
| 0.203725  | noncoding |
| 0.923374  | coding    |
| 0.0639435 | noncoding |
| 0.553244  | coding    |
| 0.383154  | noncoding |
| 0.0497351 | noncoding |
| 0.13355   | noncoding |
| 0.257791  | noncoding |
| 0.11979   | noncoding |
| 0.0510246 | noncoding |
| 0.220091  | noncoding |
| 0.339634  | noncoding |
| 0.296214  | noncoding |
| 0.954191  | coding    |
| 0.205336  | noncoding |
| 0.480624  | noncoding |
| 0.0430996 | noncoding |
| 0.396728  | noncoding |
| 0.0210919 | noncoding |
| 0.0184622 | noncoding |
| 0.0609049 | noncoding |
| 0.999976  | coding    |
| 0.0800556 | noncoding |
| 0.0809752 | noncoding |
| 1         | coding    |
| 0.0747929 | noncoding |
| 0.695437  | coding    |

|           |           |
|-----------|-----------|
| 0.0906376 | noncoding |
| 0.0230252 | noncoding |
| 0.0730396 | noncoding |
| 0.508634  | coding    |
| 0.03042   | noncoding |
| 1         | coding    |
| 0.465068  | noncoding |
| 0.344647  | noncoding |
| 0.375101  | noncoding |
| 0.020612  | noncoding |
| 1         | coding    |
| 1         | coding    |
| 0.0571582 | noncoding |
| 0.0446624 | noncoding |
| 1         | coding    |
| 1         | coding    |
| 0.0360806 | noncoding |
| 0.0366384 | noncoding |
| 0.999569  | coding    |
| 1         | coding    |
| 1         | coding    |
| 0.0441862 | noncoding |
| 1         | coding    |
| 0.215449  | noncoding |
| 0.0808647 | noncoding |
| 0.0392982 | noncoding |
| 0.459104  | noncoding |
| 1         | coding    |
| 0.999997  | coding    |
| 1         | coding    |
| 0.999942  | coding    |
| 1         | coding    |
| 0.089138  | noncoding |
| 1         | coding    |
| 0.2014    | noncoding |
| 0.0637003 | noncoding |
| 1         | coding    |
| 0.109977  | noncoding |
| 1         | coding    |
| 0.308134  | noncoding |
| 0.0312085 | noncoding |
| 1         | coding    |
| 1         | coding    |
| 1         | coding    |
| 0.848232  | coding    |
| 0.324932  | noncoding |
| 1         | coding    |
| 1         | coding    |

|            |           |
|------------|-----------|
| 0.00452412 | noncoding |
| 0.986248   | coding    |
| 0.342529   | noncoding |
| 0.042034   | noncoding |
| 0.51436    | coding    |
| 0.999695   | coding    |
| 0.0979853  | noncoding |
| 0.785475   | coding    |
| 0.268127   | noncoding |
| 0.656273   | coding    |
| 0.0714594  | noncoding |
| 0.062226   | noncoding |
| 0.102531   | noncoding |
| 0.12746    | noncoding |
| 0.0280254  | noncoding |
| 0.113526   | noncoding |
| 0.898031   | coding    |
| 0.0230039  | noncoding |
| 1          | coding    |
| 1          | coding    |
| 1          | coding    |
| 0.185276   | noncoding |
| 0.489705   | noncoding |
| 0.998817   | coding    |
| 0.999977   | coding    |
| 0.0406402  | noncoding |
| 0.0242707  | noncoding |
| 1          | coding    |
| 0.0139527  | noncoding |
| 0.0947569  | noncoding |
| 1          | coding    |
| 1          | coding    |
| 0.0123454  | noncoding |
| 0.0800201  | noncoding |
| 0.174147   | noncoding |
| 0.0905306  | noncoding |
| 0.999999   | coding    |
| 0.999999   | coding    |
| 1          | coding    |
| 1          | coding    |
| 0.162985   | noncoding |
| 0.0175647  | noncoding |
| 1          | coding    |
| 0.259936   | noncoding |
| 1          | coding    |
| 1          | coding    |
| 0.919857   | coding    |
| 0.894696   | coding    |
| 1          | coding    |
| 0.994569   | coding    |
| 0.994516   | coding    |

|           |           |
|-----------|-----------|
| 0.334742  | noncoding |
| 0.707798  | coding    |
| 0.0082531 | noncoding |
| 1         | coding    |
| 0.853175  | coding    |
| 0.0846586 | noncoding |
| 1         | coding    |
| 0.0593129 | noncoding |
| 1         | coding    |
| 0.195688  | noncoding |
| 0.312532  | noncoding |
| 0.0816812 | noncoding |
| 0.0162982 | noncoding |
| 0.171637  | noncoding |
| 0.0184777 | noncoding |
| 0.0458538 | noncoding |
| 0.0884985 | noncoding |
| 0.246959  | noncoding |
| 0.026273  | noncoding |
| 0.287214  | noncoding |
| 0.197059  | noncoding |
| 0.155696  | noncoding |
| 0.157407  | noncoding |
| 0.111855  | noncoding |
| 0.027599  | noncoding |
| 0.816715  | coding    |
| 0.999967  | coding    |
| 0.67427   | coding    |
| 0.999873  | coding    |
| 0.992605  | coding    |
| 0.999991  | coding    |
| 0.139817  | noncoding |
| 0.0961962 | noncoding |
| 0.0138468 | noncoding |
| 0.999999  | coding    |
| 0.999997  | coding    |
| 0.999998  | coding    |
| 1         | coding    |
| 0.0345441 | noncoding |
| 0.0576935 | noncoding |
| 0.95388   | coding    |

|           |           |
|-----------|-----------|
| 0.943786  | coding    |
| 0.537187  | coding    |
| 0.588895  | coding    |
| 0.999982  | coding    |
| 0.999982  | coding    |
| 0.0386276 | noncoding |
| 0.0467483 | noncoding |
| 1         | coding    |
| 0.0569048 | noncoding |
| 0.111749  | noncoding |
| 0.117491  | noncoding |
| 1         | coding    |
| 0.589986  | coding    |
| 0.73793   | coding    |
| 1         | coding    |
| 0.0266913 | noncoding |
| 0.0100626 | noncoding |
| 0.999989  | coding    |
| 0.107194  | noncoding |
| 0.0172165 | noncoding |
| 1         | coding    |
| 0.998566  | coding    |
| 0.999993  | coding    |
| 1         | coding    |
| 0.0136874 | noncoding |
| 1         | coding    |
| 0.823966  | coding    |
| 1         | coding    |
| 1         | coding    |
| 0.0415551 | noncoding |
| 0.038795  | noncoding |
| 0.139776  | noncoding |
| 1         | coding    |
| 0.956188  | coding    |

|           |           |
|-----------|-----------|
| 0.0497973 | noncoding |
| 0.305781  | noncoding |
| 1         | coding    |
| 1         | coding    |
| 0.464894  | noncoding |
| 1         | coding    |
| 0.236152  | noncoding |
| 0.977167  | coding    |
| 0.0414243 | noncoding |
| 0.669674  | coding    |
| 0.464473  | noncoding |
| 0.74293   | coding    |
| 0.693499  | coding    |
| 1         | coding    |
| 0.999901  | coding    |
| 1         | coding    |
| 0.205505  | noncoding |
| 0.0171795 | noncoding |
| 0.999997  | coding    |
| 0.999977  | coding    |
| 1         | coding    |
| 1         | coding    |
| 0.9995    | coding    |
| 1         | coding    |
| 0.599524  | coding    |
| 0.567698  | coding    |
| 0.653929  | coding    |
| 0.0106292 | noncoding |
| 0.019031  | noncoding |
| 1         | coding    |
| 0.0203822 | noncoding |
| 0.26412   | noncoding |
| 0.406223  | noncoding |
| 1         | coding    |
| 0.999999  | coding    |
| 0.999999  | coding    |
| 0.0188475 | noncoding |
| 0.0168589 | noncoding |
| 0.0167652 | noncoding |
| 0.183266  | noncoding |

|            |           |
|------------|-----------|
| 0.0274647  | noncoding |
| 0.0470864  | noncoding |
| 0.559428   | coding    |
| 0.998307   | coding    |
| 0.988761   | coding    |
| 0.986822   | coding    |
| 0.0262248  | noncoding |
| 0.32825    | noncoding |
| 0.0661331  | noncoding |
| 0.583011   | coding    |
| 0.0994802  | noncoding |
| 0.0308343  | noncoding |
| 0.0473228  | noncoding |
| 0.014728   | noncoding |
| 0.00478487 | noncoding |
| 0.0213176  | noncoding |
| 0.999994   | coding    |
| 1          | coding    |
| 1          | coding    |
| 1          | coding    |
| 0.79152    | coding    |
| 1          | coding    |
| 0.972499   | coding    |
| 0.516381   | coding    |
| 1          | coding    |
| 0.0205289  | noncoding |
| 0.0107343  | noncoding |
| 0.962997   | coding    |
| 1          | coding    |
| 0.985379   | coding    |
| 0.0574145  | noncoding |
| 0.999998   | coding    |
| 1          | coding    |
| 1          | coding    |
| 1          | coding    |
| 0.0661847  | noncoding |
| 0.980567   | coding    |
| 1          | coding    |
| 1          | coding    |
| 0.913015   | coding    |
| 0.999999   | coding    |
| 1          | coding    |
| 0.999597   | coding    |
| 0.652853   | coding    |
| 1          | coding    |
| 0.929129   | coding    |
| 0.0314809  | noncoding |
| 1          | coding    |

|           |           |
|-----------|-----------|
| 0.0681679 | noncoding |
| 0.0320039 | noncoding |
| 1         | coding    |
| 1         | coding    |
| 0.999959  | coding    |
| 0.122006  | noncoding |
| 1         | coding    |
| 1         | coding    |
| 1         | coding    |
| 0.270254  | noncoding |
| 0.999329  | coding    |
| 0.999992  | coding    |
| 0.999898  | coding    |
| 1         | coding    |
| 1         | coding    |
| 0.0181393 | noncoding |
| 0.287094  | noncoding |
| 0.0554791 | noncoding |
| 0.942415  | coding    |
| 0.999881  | coding    |
| 1         | coding    |
| 0.110093  | noncoding |
| 1         | coding    |
| 0.143232  | noncoding |
| 0.630535  | coding    |
| 0.0409434 | noncoding |
| 0.0242682 | noncoding |
| 0.0400068 | noncoding |
| 1         | coding    |
| 0.904928  | coding    |
| 0.124365  | noncoding |
| 0.400448  | noncoding |
| 0.141272  | noncoding |
| 0.177962  | noncoding |
| 1         | coding    |
| 0.0356171 | noncoding |
| 0.845947  | coding    |
| 0.026964  | noncoding |
| 1         | coding    |
| 0.0595121 | noncoding |
| 0.0623908 | noncoding |
| 0.044066  | noncoding |
| 0.0660134 | noncoding |
| 0.983133  | coding    |
| 0.987721  | coding    |
| 0.991568  | coding    |
| 1         | coding    |
| 1         | coding    |
| 1         | coding    |
| 0.148166  | noncoding |
| 1         | coding    |
| 0.999462  | coding    |
| 0.997795  | coding    |
| 0.998599  | coding    |



|           |           |
|-----------|-----------|
| 1         | coding    |
| 1         | coding    |
| 1         | coding    |
| 0.993642  | coding    |
| 0.455207  | noncoding |
| 0.510026  | coding    |
| 1         | coding    |
| 1         | coding    |
| 0.999998  | coding    |
| 0.999996  | coding    |
| 0.990954  | coding    |
| 0.999907  | coding    |
| 1         | coding    |
| 1         | coding    |
| 0.213382  | noncoding |
| 0.693981  | coding    |
| 0.999829  | coding    |
| 0.999844  | coding    |
| 0.999994  | coding    |
| 0.999972  | coding    |
| 0.848814  | coding    |
| 0.0496561 | noncoding |
| 0.0369127 | noncoding |
| 0.730955  | coding    |
| 0.999997  | coding    |
| 1         | coding    |
| 0.0112912 | noncoding |
| 1         | coding    |
| 0.0125583 | noncoding |
| 0.47851   | noncoding |
| 0.797488  | coding    |
| 0.997798  | coding    |
| 0.256914  | noncoding |
| 0.104028  | noncoding |
| 0.255982  | noncoding |
| 0.999567  | coding    |
| 0.980252  | coding    |
| 0.999868  | coding    |
| 0.999999  | coding    |
| 1         | coding    |
| 0.0241072 | noncoding |
| 0.0283348 | noncoding |
| 0.201662  | noncoding |
| 0.160249  | noncoding |
| 0.160763  | noncoding |
| 0.791357  | coding    |
| 0.997244  | coding    |
| 0.0486179 | noncoding |
| 0.0644521 | noncoding |
| 0.0236762 | noncoding |
| 0.100014  | noncoding |
| 0.950618  | coding    |
| 0.0100649 | noncoding |
| 0.0674144 | noncoding |

|            |           |
|------------|-----------|
| 0.999955   | coding    |
| 0.0191303  | noncoding |
| 0.0892858  | noncoding |
| 0.236148   | noncoding |
| 0.643045   | coding    |
| 0.00832506 | noncoding |
| 0.845928   | coding    |
| 0.972241   | coding    |
| 0.980789   | coding    |
| 0.214922   | noncoding |
| 0.99999    | coding    |
| 0.217733   | noncoding |
| 0.660941   | coding    |
| 0.026917   | noncoding |
| 0.841016   | coding    |
| 1          | coding    |
| 0.989125   | coding    |
| 0.0172415  | noncoding |
| 1          | coding    |
| 1          | coding    |
| 0.0954955  | noncoding |
| 0.67167    | coding    |
| 0.82198    | coding    |
| 0.898991   | coding    |
| 0.667427   | coding    |
| 0.853176   | coding    |
| 0.620405   | coding    |
| 1          | coding    |
| 1          | coding    |
| 0.997599   | coding    |
| 0.997111   | coding    |
| 0.227071   | noncoding |
| 0.0587602  | noncoding |
| 0.0287253  | noncoding |
| 0.0235206  | noncoding |
| 0.0747009  | noncoding |
| 0.999996   | coding    |
| 0.999999   | coding    |
| 1          | coding    |
| 1          | coding    |
| 0.999998   | coding    |
| 1          | coding    |
| 1          | coding    |
| 0.105608   | noncoding |
| 0.533209   | coding    |
| 1          | coding    |
| 0.527038   | coding    |
| 1          | coding    |
| 1          | coding    |
| 0.0642904  | noncoding |
| 0.817444   | coding    |
| 0.942029   | coding    |
| 0.577732   | coding    |
| 0.480623   | noncoding |

|           |           |
|-----------|-----------|
| 1         | coding    |
| 0.999999  | coding    |
| 1         | coding    |
| 0.999592  | coding    |
| 0.16764   | noncoding |
| 0.971353  | coding    |
| 0.996686  | coding    |
| 1         | coding    |
| 1         | coding    |
| 0.984991  | coding    |
| 0.399391  | noncoding |
| 0.990255  | coding    |
| 0.399307  | noncoding |
| 0.17408   | noncoding |
| 0.0271136 | noncoding |
| 0.640293  | coding    |
| 0.916362  | coding    |
| 0.597158  | coding    |
| 0.739353  | coding    |
| 1         | coding    |
| 0.16496   | noncoding |
| 0.284622  | noncoding |
| 0.994345  | coding    |
| 0.0517483 | noncoding |
| 1         | coding    |
| 1         | coding    |
| 1         | coding    |
| 0.973536  | coding    |
| 0.025293  | noncoding |
| 0.155002  | noncoding |
| 1         | coding    |
| 1         | coding    |
| 0.0273965 | noncoding |
| 1         | coding    |
| 0.998867  | coding    |
| 1         | coding    |
| 0.479654  | noncoding |

|            |           |
|------------|-----------|
| 0.613345   | coding    |
| 0.00411474 | noncoding |
| 1          | coding    |
| 0.999787   | coding    |
| 0.0377743  | noncoding |
| 1          | coding    |
| 0.916143   | coding    |
| 1          | coding    |
| 1          | coding    |
| 1          | coding    |
| 0.0685899  | noncoding |
| 0.999659   | coding    |
| 0.25786    | noncoding |
| 1          | coding    |
| 1          | coding    |
| 0.0523564  | noncoding |
| 0.489266   | noncoding |
| 0.288335   | noncoding |
| 1          | coding    |
| 0.995319   | coding    |
| 0.999913   | coding    |
| 0.48398    | noncoding |
| 0.999584   | coding    |
| 0.838023   | coding    |
| 0.998248   | coding    |
| 0.997897   | coding    |
| 0.0691002  | noncoding |
| 0.259285   | noncoding |
| 0.99976    | coding    |
| 0.999584   | coding    |
| 1          | coding    |
| 0.417823   | noncoding |
| 0.999985   | coding    |
| 0.117198   | noncoding |
| 1          | coding    |
| 0.997686   | coding    |
| 0.881898   | coding    |
| 0.89787    | coding    |
| 0.825646   | coding    |
| 0.066744   | noncoding |
| 0.144853   | noncoding |
| 0.0328603  | noncoding |
| 0.999998   | coding    |
| 0.108415   | noncoding |
| 0.99863    | coding    |
| 1          | coding    |
| 1          | coding    |
| 0.976524   | coding    |
| 0.12778    | noncoding |
| 1          | coding    |
| 0.545138   | coding    |

|           |           |
|-----------|-----------|
| 1         | coding    |
| 1         | coding    |
| 0.998695  | coding    |
| 0.148823  | noncoding |
| 1         | coding    |
| 1         | coding    |
| 1         | coding    |
| 0.919643  | coding    |
| 0.999999  | coding    |
| 1         | coding    |
| 0.0473583 | noncoding |
| 0.840936  | coding    |
| 0.158923  | noncoding |
| 1         | coding    |
| 0.855382  | coding    |
| 0.863239  | coding    |
| 0.999947  | coding    |
| 0.999957  | coding    |
| 0.871194  | coding    |
| 0.999957  | coding    |
| 0.697092  | coding    |
| 0.40617   | noncoding |
| 0.698137  | coding    |
| 0.698137  | coding    |
| 0.449439  | noncoding |
| 0.470343  | noncoding |
| 0.656433  | coding    |
| 0.443053  | noncoding |
| 0.976233  | coding    |
| 1         | coding    |
| 1         | coding    |
| 1         | coding    |
| 0.997248  | coding    |
| 0.153046  | noncoding |
| 0.0869821 | noncoding |
| 0.161615  | noncoding |
| 0.999996  | coding    |
| 0.26178   | noncoding |
| 0.0855756 | noncoding |
| 0.903198  | coding    |
| 0.715187  | coding    |
| 1         | coding    |

|           |           |
|-----------|-----------|
| 0.999999  | coding    |
| 1         | coding    |
| 0.999983  | coding    |
| 0.0412297 | noncoding |
| 0.107328  | noncoding |
| 1         | coding    |
| 1         | coding    |
| 0.165734  | noncoding |
| 0.0368232 | noncoding |
| 1         | coding    |
| 1         | coding    |
| 0.559011  | coding    |
| 1         | coding    |
| 0.116895  | noncoding |
| 0.0302667 | noncoding |
| 0.311939  | noncoding |
| 1         | coding    |
| 1         | coding    |
| 0.17275   | noncoding |
| 0.0816644 | noncoding |
| 1         | coding    |
| 1         | coding    |
| 0.809396  | coding    |
| 1         | coding    |
| 0.0275697 | noncoding |
| 0.346555  | noncoding |
| 0.580584  | coding    |
| 0.998359  | coding    |
| 0.615677  | coding    |
| 0.986025  | coding    |
| 0.912367  | coding    |
| 0.104325  | noncoding |
| 0.127508  | noncoding |
| 1         | coding    |
| 1         | coding    |
| 1         | coding    |
| 0.116361  | noncoding |
| 0.180123  | noncoding |
| 0.0740462 | noncoding |
| 0.999854  | coding    |
| 0.410709  | noncoding |
| 0.0958949 | noncoding |
| 0.986135  | coding    |
| 0.938555  | coding    |
| 0.999455  | coding    |
| 0.0429363 | noncoding |
| 0.999967  | coding    |
| 0.999983  | coding    |
| 1         | coding    |
| 1         | coding    |
| 0.917574  | coding    |
| 0.999993  | coding    |
| 0.999758  | coding    |
| 0.0583229 | noncoding |

|            |           |
|------------|-----------|
| 0.722205   | coding    |
| 0.996503   | coding    |
| 0.999949   | coding    |
| 0.496198   | noncoding |
| 1          | coding    |
| 1          | coding    |
| 0.0150444  | noncoding |
| 0.879259   | coding    |
| 0.137141   | noncoding |
| 0.995565   | coding    |
| 0.141785   | noncoding |
| 0.0934064  | noncoding |
| 0.00878003 | noncoding |
| 0.19242    | noncoding |
| 0.318756   | noncoding |
| 0.00409683 | noncoding |
| 0.00429283 | noncoding |
| 0.247779   | noncoding |
| 0.0965851  | noncoding |
| 0.766809   | coding    |
| 0.0392353  | noncoding |
| 0.047258   | noncoding |
| 0.51333    | coding    |
| 0.999874   | coding    |
| 1          | coding    |
| 0.0498012  | noncoding |
| 0.999999   | coding    |
| 0.999993   | coding    |
| 0.97904    | coding    |
| 1          | coding    |
| 1          | coding    |
| 0.0887344  | noncoding |
| 1          | coding    |
| 1          | coding    |
| 0.109259   | noncoding |
| 0.13553    | noncoding |
| 1          | coding    |
| 0.0769983  | noncoding |
| 0.999982   | coding    |
| 0.302613   | noncoding |
| 0.351916   | noncoding |
| 1          | coding    |
| 0.999984   | coding    |
| 0.0286967  | noncoding |
| 0.954459   | coding    |
| 0.768049   | coding    |
| 0.775679   | coding    |
| 0.775679   | coding    |
| 0.870132   | coding    |
| 0.995646   | coding    |
| 0.995408   | coding    |
| 0.999725   | coding    |
| 0.0366361  | noncoding |
| 0.100529   | noncoding |

|           |           |
|-----------|-----------|
| 1         | coding    |
| 0.998429  | coding    |
| 0.177104  | noncoding |
| 0.0405542 | noncoding |
| 0.2283    | noncoding |
| 0.0705003 | noncoding |
| 0.160161  | noncoding |
| 1         | coding    |
| 0.915361  | coding    |
| 1         | coding    |
| 1         | coding    |
| 0.0892091 | noncoding |
| 0.0176734 | noncoding |
| 0.0195718 | noncoding |
| 0.172336  | noncoding |
| 0.999986  | coding    |
| 0.996103  | coding    |
| 0.999656  | coding    |
| 0.0110718 | noncoding |
| 0.0113892 | noncoding |
| 0.477132  | noncoding |
| 0.999201  | coding    |
| 0.0266379 | noncoding |
| 0.997949  | coding    |
| 0.067908  | noncoding |
| 1         | coding    |
| 0.997325  | coding    |
| 0.834231  | coding    |
| 0.920986  | coding    |
| 0.781975  | coding    |
| 0.915826  | coding    |
| 0.279096  | noncoding |
| 0.0738707 | noncoding |
| 0.0255031 | noncoding |
| 0.999864  | coding    |
| 0.595968  | coding    |
| 0.168743  | noncoding |
| 0.0699674 | noncoding |
| 0.0484136 | noncoding |
| 0.296375  | noncoding |
| 0.0108286 | noncoding |
| 0.999998  | coding    |
| 0.999774  | coding    |
| 1         | coding    |
| 1         | coding    |



|            |           |
|------------|-----------|
| 0.0217308  | noncoding |
| 0.0506815  | noncoding |
| 0.999997   | coding    |
| 0.999996   | coding    |
| 0.949851   | coding    |
| 0.135211   | noncoding |
| 1          | coding    |
| 1          | coding    |
| 0.673058   | coding    |
| 0.0344735  | noncoding |
| 0.00706358 | noncoding |
| 1          | coding    |
| 0.0368764  | noncoding |
| 0.446826   | noncoding |
| 0.0682051  | noncoding |
| 0.0506632  | noncoding |
| 0.178479   | noncoding |
| 0.0617802  | noncoding |
| 1          | coding    |
| 1          | coding    |
| 0.0324193  | noncoding |
| 0.989356   | coding    |
| 0.975088   | coding    |
| 0.994423   | coding    |
| 0.996601   | coding    |
| 0.133155   | noncoding |
| 0.992383   | coding    |
| 0.0325145  | noncoding |
| 0.0565145  | noncoding |
| 0.11618    | noncoding |
| 0.996847   | coding    |
| 0.999993   | coding    |
| 0.0105868  | noncoding |
| 0.00307934 | noncoding |
| 0.0217116  | noncoding |
| 0.937518   | coding    |
| 1          | coding    |
| 0.703574   | coding    |
| 1          | coding    |
| 0.0469471  | noncoding |
| 1          | coding    |
| 1          | coding    |
| 0.0901768  | noncoding |
| 0.996424   | coding    |
| 0.0601968  | noncoding |
| 0.200087   | noncoding |

|           |           |
|-----------|-----------|
| 0.133517  | noncoding |
| 0.818584  | coding    |
| 0.0322477 | noncoding |
| 0.0929919 | noncoding |
| 0.278354  | noncoding |
| 1         | coding    |
| 0.514003  | coding    |
| 0.173674  | noncoding |
| 0.436631  | noncoding |
| 0.127953  | noncoding |
| 0.0266948 | noncoding |
| 0.0251467 | noncoding |
| 0.758998  | coding    |
| 0.113352  | noncoding |
| 1         | coding    |
| 0.559017  | coding    |
| 1         | coding    |
| 1         | coding    |
| 1         | coding    |
| 0.413119  | noncoding |
| 0.394     | noncoding |
| 1         | coding    |
| 1         | coding    |
| 0.0765488 | noncoding |
| 0.960285  | coding    |
| 0.0717518 | noncoding |
| 0.132339  | noncoding |
| 0.0646373 | noncoding |
| 1         | coding    |
| 1         | coding    |
| 1         | coding    |
| 0.999999  | coding    |
| 0.0335109 | noncoding |
| 0.390432  | noncoding |
| 0.999999  | coding    |
| 1         | coding    |
| 1         | coding    |
| 1         | coding    |
| 0.174236  | noncoding |
| 1         | coding    |
| 0.131637  | noncoding |
| 0.999999  | coding    |
| 1         | coding    |
| 1         | coding    |
| 0.126419  | noncoding |
| 0.999889  | coding    |
| 0.763235  | coding    |
| 0.999929  | coding    |
| 0.0566469 | noncoding |
| 0.0124351 | noncoding |
| 0.999435  | coding    |
| 1         | coding    |
| 0.0292171 | noncoding |
| 0.999944  | coding    |

|           |           |
|-----------|-----------|
| 0.989297  | coding    |
| 0.986908  | coding    |
| 0.999999  | coding    |
| 0.0302614 | noncoding |
| 0.0567085 | noncoding |
| 0.067903  | noncoding |
| 1         | coding    |
| 1         | coding    |
| 1         | coding    |
| 0.111488  | noncoding |
| 1         | coding    |
| 0.063739  | noncoding |
| 0.199552  | noncoding |
| 0.0726198 | noncoding |
| 0.296151  | noncoding |
| 0.229806  | noncoding |
| 1         | coding    |
| 0.225611  | noncoding |
| 0.953397  | coding    |
| 0.909818  | coding    |
| 1         | coding    |
| 1         | coding    |
| 1         | coding    |
| 0.0384759 | noncoding |
| 0.0656254 | noncoding |
| 0.083148  | noncoding |
| 0.99995   | coding    |
| 0.999989  | coding    |
| 0.0262247 | noncoding |
| 0.602124  | coding    |
| 1         | coding    |
| 1         | coding    |
| 0.0664242 | noncoding |
| 0.0614624 | noncoding |
| 0.152123  | noncoding |
| 0.0802541 | noncoding |
| 0.0870001 | noncoding |
| 0.69739   | coding    |
| 0.109661  | noncoding |
| 0.109661  | noncoding |
| 0.0403922 | noncoding |
| 0.134572  | noncoding |
| 1         | coding    |
| 1         | coding    |
| 1         | coding    |
| 0.015683  | noncoding |
| 0.0148949 | noncoding |
| 1         | coding    |
| 1         | coding    |
| 0.999999  | coding    |
| 0.952954  | coding    |

|            |           |
|------------|-----------|
| 0.912519   | coding    |
| 1          | coding    |
| 0.99323    | coding    |
| 0.99523    | coding    |
| 0.738478   | coding    |
| 0.993324   | coding    |
| 0.00233927 | noncoding |
| 0.0161693  | noncoding |
| 0.014885   | noncoding |
| 0.123754   | noncoding |
| 0.0600459  | noncoding |
| 0.999977   | coding    |
| 0.997787   | coding    |
| 1          | coding    |
| 0.9381     | coding    |
| 0.112423   | noncoding |
| 0.134121   | noncoding |
| 1          | coding    |
| 0.999995   | coding    |
| 0.0161694  | noncoding |
| 0.339481   | noncoding |
| 0.0529435  | noncoding |
| 0.215265   | noncoding |
| 0.014481   | noncoding |
| 1          | coding    |
| 0.0863819  | noncoding |
| 0.00741646 | noncoding |
| 0.898058   | coding    |
| 0.714143   | coding    |
| 0.0572479  | noncoding |
| 1          | coding    |
| 0.115477   | noncoding |
| 0.999991   | coding    |
| 0.177536   | noncoding |
| 0.171908   | noncoding |
| 1          | coding    |
| 0.0617381  | noncoding |
| 0.951316   | coding    |
| 0.0339922  | noncoding |
| 0.0358075  | noncoding |
| 1          | coding    |
| 0.195981   | noncoding |

|            |           |
|------------|-----------|
| 1          | coding    |
| 0.106036   | noncoding |
| 1          | coding    |
| 0.0811192  | noncoding |
| 0.067262   | noncoding |
| 0.0712303  | noncoding |
| 0.390841   | noncoding |
| 0.0305008  | noncoding |
| 0.12928    | noncoding |
| 0.195793   | noncoding |
| 0.262472   | noncoding |
| 0.985328   | coding    |
| 0.990658   | coding    |
| 1          | coding    |
| 0.799407   | coding    |
| 0.999996   | coding    |
| 0.334155   | noncoding |
| 0.0536832  | noncoding |
| 0.806552   | coding    |
| 0.144324   | noncoding |
| 0.771116   | coding    |
| 1          | coding    |
| 0.00866877 | noncoding |
| 0.060476   | noncoding |
| 1          | coding    |
| 1          | coding    |
| 0.999997   | coding    |
| 1          | coding    |
| 1          | coding    |
| 1          | coding    |
| 0.0233618  | noncoding |
| 0.0493861  | noncoding |
| 0.0506874  | noncoding |
| 0.0783472  | noncoding |
| 0.0556779  | noncoding |
| 0.145046   | noncoding |
| 0.997933   | coding    |
| 0.905724   | coding    |
| 0.0074484  | noncoding |
| 0.0849516  | noncoding |

|            |           |
|------------|-----------|
| 1          | coding    |
| 0.0908669  | noncoding |
| 0.0527844  | noncoding |
| 0.0413582  | noncoding |
| 0.0372039  | noncoding |
| 1          | coding    |
| 1          | coding    |
| 0.0126042  | noncoding |
| 0.6387     | coding    |
| 0.217488   | noncoding |
| 0.696911   | coding    |
| 0.0370734  | noncoding |
| 0.178992   | noncoding |
| 0.0153529  | noncoding |
| 0.150628   | noncoding |
| 0.0646692  | noncoding |
| 1          | coding    |
| 1          | coding    |
| 0.866685   | coding    |
| 0.268171   | noncoding |
| 0.994083   | coding    |
| 0.999963   | coding    |
| 0.999997   | coding    |
| 0.561698   | coding    |
| 0.645148   | coding    |
| 0.460153   | noncoding |
| 0.885254   | coding    |
| 0.645148   | coding    |
| 0.635609   | coding    |
| 1          | coding    |
| 0.0601119  | noncoding |
| 0.585364   | coding    |
| 0.013648   | noncoding |
| 1          | coding    |
| 0.678945   | coding    |
| 0.0156808  | noncoding |
| 0.253538   | noncoding |
| 0.829815   | coding    |
| 0.999827   | coding    |
| 0.999034   | coding    |
| 1          | coding    |
| 1          | coding    |
| 0.118306   | noncoding |
| 0.0302345  | noncoding |
| 0.0133343  | noncoding |
| 0.999973   | coding    |
| 1          | coding    |
| 1          | coding    |
| 0.999986   | coding    |
| 0.00788725 | noncoding |
| 1          | coding    |

|           |           |
|-----------|-----------|
| 1         | coding    |
| 0.449804  | noncoding |
| 0.231349  | noncoding |
| 0.999994  | coding    |
| 0.999967  | coding    |
| 0.0195298 | noncoding |
| 1         | coding    |
| 0.242854  | noncoding |
| 0.81331   | coding    |
| 0.976383  | coding    |
| 0.0789318 | noncoding |
| 1         | coding    |
| 0.0229647 | noncoding |
| 0.54719   | coding    |
| 0.0196102 | noncoding |
| 0.0998179 | noncoding |
| 0.999799  | coding    |
| 0.422533  | noncoding |
| 0.335198  | noncoding |
| 0.207403  | noncoding |
| 0.996478  | coding    |
| 0.501119  | coding    |
| 0.136368  | noncoding |
| 0.168544  | noncoding |
| 0.805937  | coding    |
| 0.999996  | coding    |
| 0.624364  | coding    |
| 0.999998  | coding    |
| 0.999646  | coding    |
| 0.0590566 | noncoding |
| 0.0191258 | noncoding |
| 0.0185878 | noncoding |
| 0.0149737 | noncoding |
| 0.124013  | noncoding |

|           |           |
|-----------|-----------|
| 0.0805681 | noncoding |
| 0.999979  | coding    |
| 1         | coding    |
| 1         | coding    |
| 0.735186  | coding    |
| 1         | coding    |
| 1         | coding    |
| 0.997681  | coding    |
| 0.146776  | noncoding |
| 0.0659681 | noncoding |
| 1         | coding    |
| 0.15488   | noncoding |
| 0.991848  | coding    |
| 0.990048  | coding    |
| 0.990225  | coding    |
| 0.993305  | coding    |
| 0.999993  | coding    |
| 0.999985  | coding    |
| 0.989819  | coding    |
| 0.993912  | coding    |
| 0.999994  | coding    |
| 0.965018  | coding    |
| 0.0209186 | noncoding |
| 1         | coding    |
| 1         | coding    |
| 1         | coding    |
| 0.501521  | coding    |
| 0.637631  | coding    |
| 0.978559  | coding    |
| 1         | coding    |
| 1         | coding    |
| 1         | coding    |
| 0.997655  | coding    |
| 1         | coding    |
| 0.999478  | coding    |
| 0.263379  | noncoding |
| 0.313784  | noncoding |
| 0.383021  | noncoding |
| 0.0443008 | noncoding |
| 0.0157419 | noncoding |
| 0.270781  | noncoding |
| 0.158649  | noncoding |
| 1         | coding    |
| 0.0243936 | noncoding |
| 0.0350153 | noncoding |
| 0.132959  | noncoding |
| 0.0199546 | noncoding |
| 0.117966  | noncoding |
| 1         | coding    |



|           |           |
|-----------|-----------|
| 1         | coding    |
| 1         | coding    |
| 0.99134   | coding    |
| 1         | coding    |
| 0.391467  | noncoding |
| 1         | coding    |
| 1         | coding    |
| 1         | coding    |
| 0.0234971 | noncoding |
| 0.055062  | noncoding |
| 1         | coding    |
| 0.893797  | coding    |
| 1         | coding    |
| 0.102905  | noncoding |
| 0.0765799 | noncoding |
| 1         | coding    |
| 1         | coding    |
| 0.146389  | noncoding |
| 0.0696762 | noncoding |
| 0.0112209 | noncoding |
| 0.0233792 | noncoding |
| 0.0469003 | noncoding |
| 0.0332216 | noncoding |
| 0.0999501 | noncoding |
| 0.999939  | coding    |
| 1         | coding    |
| 0.997611  | coding    |
| 0.997611  | coding    |
| 0.0549245 | noncoding |
| 0.999995  | coding    |
| 0.0646943 | noncoding |
| 1         | coding    |
| 0.0504563 | noncoding |
| 0.0483906 | noncoding |
| 0.0418253 | noncoding |
| 0.0791598 | noncoding |
| 0.0300846 | noncoding |
| 1         | coding    |
| 1         | coding    |
| 1         | coding    |
| 0.0127913 | noncoding |
| 0.0138423 | noncoding |
| 0.0194715 | noncoding |
| 0.122353  | noncoding |
| 0.118516  | noncoding |
| 0.175075  | noncoding |
| 0.0806754 | noncoding |
| 0.0806754 | noncoding |
| 0.0743714 | noncoding |
| 0.0396479 | noncoding |
| 0.290218  | noncoding |
| 1         | coding    |
| 1         | coding    |
| 1         | coding    |

|            |           |
|------------|-----------|
| 1          | coding    |
| 0.0569365  | noncoding |
| 0.973938   | coding    |
| 1          | coding    |
| 0.802905   | coding    |
| 0.0126599  | noncoding |
| 0.0155865  | noncoding |
| 0.0820712  | noncoding |
| 0.26025    | noncoding |
| 0.400958   | noncoding |
| 0.059733   | noncoding |
| 0.00944942 | noncoding |
| 1          | coding    |
| 0.290998   | noncoding |
| 0.0661252  | noncoding |
| 0.0292856  | noncoding |
| 0.0420745  | noncoding |
| 0.0800041  | noncoding |
| 0.0304633  | noncoding |
| 0.0109375  | noncoding |
| 0.360153   | noncoding |
| 0.0840607  | noncoding |
| 1          | coding    |
| 0.999987   | coding    |
| 1          | coding    |
| 0.0781392  | noncoding |
| 0.146186   | noncoding |
| 1          | coding    |
| 0.999998   | coding    |
| 1          | coding    |
| 1          | coding    |
| 1          | coding    |
| 0.99881    | coding    |
| 0.0772786  | noncoding |
| 0.928969   | coding    |
| 0.720171   | coding    |
| 0.999998   | coding    |
| 1          | coding    |
| 0.999944   | coding    |
| 0.999998   | coding    |
| 0.999998   | coding    |
| 1          | coding    |

|           |           |
|-----------|-----------|
| 0.999989  | coding    |
| 0.99998   | coding    |
| 1         | coding    |
| 0.971707  | coding    |
| 0.0369153 | noncoding |
| 1         | coding    |
| 0.132448  | noncoding |
| 0.0362299 | noncoding |
| 0.0481991 | noncoding |
| 1         | coding    |
| 0.199767  | noncoding |
| 0.0302333 | noncoding |
| 0.021243  | noncoding |
| 1         | coding    |
| 0.0652283 | noncoding |
| 0.445533  | noncoding |
| 0.569166  | coding    |
| 1         | coding    |
| 1         | coding    |
| 1         | coding    |
| 0.186797  | noncoding |
| 1         | coding    |
| 0.0170091 | noncoding |
| 0.0296319 | noncoding |
| 0.0245162 | noncoding |
| 0.999983  | coding    |
| 0.999993  | coding    |
| 0.994754  | coding    |
| 0.0778674 | noncoding |
| 0.245839  | noncoding |
| 0.0306057 | noncoding |
| 0.256774  | noncoding |
| 0.999988  | coding    |
| 0.999872  | coding    |
| 0.999794  | coding    |
| 1         | coding    |
| 0.994083  | coding    |
| 1         | coding    |
| 0.298295  | noncoding |
| 1         | coding    |
| 1         | coding    |
| 0.0914673 | noncoding |
| 0.149771  | noncoding |
| 0.17522   | noncoding |
| 0.106118  | noncoding |
| 0.151657  | noncoding |
| 0.0920378 | noncoding |
| 1         | coding    |

|           |           |
|-----------|-----------|
| 0.999669  | coding    |
| 0.999669  | coding    |
| 0.999669  | coding    |
| 0.16104   | noncoding |
| 0.0254152 | noncoding |
| 1         | coding    |
| 1         | coding    |
| 1         | coding    |
| 0.333818  | noncoding |
| 0.932709  | coding    |
| 1         | coding    |
| 0.982789  | coding    |
| 0.988248  | coding    |
| 0.92191   | coding    |
| 0.999993  | coding    |
| 1         | coding    |
| 1         | coding    |
| 0.853657  | coding    |
| 1         | coding    |
| 0.0283163 | noncoding |
| 0.858059  | coding    |
| 0.57539   | coding    |
| 0.284969  | noncoding |
| 0.990918  | coding    |
| 0.0598551 | noncoding |
| 0.982358  | coding    |
| 0.949829  | coding    |
| 0.0651966 | noncoding |
| 1         | coding    |
| 0.999659  | coding    |
| 0.998529  | coding    |
| 0.998529  | coding    |
| 0.996347  | coding    |
| 0.278194  | noncoding |
| 1         | coding    |
| 1         | coding    |
| 1         | coding    |
| 0.955292  | coding    |
| 1         | coding    |
| 0.999904  | coding    |
| 0.998697  | coding    |
| 1         | coding    |
| 0.186175  | noncoding |
| 0.118622  | noncoding |
| 0.0492912 | noncoding |
| 1         | coding    |
| 1         | coding    |
| 1         | coding    |
| 0.657705  | coding    |
| 0.795486  | coding    |
| 0.681153  | coding    |
| 1         | coding    |
| 0.999537  | coding    |
| 0.423958  | noncoding |

|           |           |
|-----------|-----------|
| 1         | coding    |
| 1         | coding    |
| 1         | coding    |
| 0.781555  | coding    |
| 0.897439  | coding    |
| 0.912795  | coding    |
| 0.988266  | coding    |
| 1         | coding    |
| 0.0109733 | noncoding |
| 0.999922  | coding    |
| 0.999895  | coding    |
| 0.10722   | noncoding |
| 0.547786  | coding    |
| 0.0934183 | noncoding |
| 0.0126173 | noncoding |
| 1         | coding    |
| 1         | coding    |
| 0.973288  | coding    |
| 1         | coding    |
| 0.998124  | coding    |
| 0.0810512 | noncoding |
| 1         | coding    |
| 0.999944  | coding    |
| 0.95378   | coding    |
| 0.974617  | coding    |
| 0.957358  | coding    |
| 0.999997  | coding    |
| 1         | coding    |
| 1         | coding    |
| 1         | coding    |
| 0.204387  | noncoding |
| 0.999993  | coding    |
| 0.999993  | coding    |
| 1         | coding    |
| 1         | coding    |
| 0.107772  | noncoding |
| 1         | coding    |
| 0.0172747 | noncoding |
| 0.996292  | coding    |
| 0.427567  | noncoding |
| 0.999387  | coding    |
| 0.977711  | coding    |
| 1         | coding    |
| 1         | coding    |
| 1         | coding    |
| 0.0181165 | noncoding |
| 0.170995  | noncoding |
| 0.164903  | noncoding |
| 0.207024  | noncoding |
| 0.999998  | coding    |
| 0.999998  | coding    |
| 1         | coding    |
| 1         | coding    |
| 1         | coding    |

|           |           |
|-----------|-----------|
| 0.999703  | coding    |
| 1         | coding    |
| 1         | coding    |
| 0.999999  | coding    |
| 0.404038  | noncoding |
| 0.543915  | coding    |
| 1         | coding    |
| 1         | coding    |
| 0.0558297 | noncoding |
| 0.999999  | coding    |
| 0.999992  | coding    |
| 0.606832  | coding    |
| 0.999783  | coding    |
| 0.698961  | coding    |
| 0.844151  | coding    |
| 0.599176  | coding    |
| 0.968898  | coding    |
| 0.0398055 | noncoding |
| 1         | coding    |
| 0.997584  | coding    |
| 1         | coding    |
| 1         | coding    |
| 1         | coding    |
| 0.999866  | coding    |
| 0.717595  | coding    |
| 0.454108  | noncoding |
| 0.702936  | coding    |
| 0.513492  | coding    |
| 0.545034  | coding    |
| 0.187053  | noncoding |
| 0.184683  | noncoding |
| 0.180493  | noncoding |
| 0.69559   | coding    |
| 0.290915  | noncoding |
| 0.0297736 | noncoding |
| 0.0209007 | noncoding |
| 0.999068  | coding    |
| 0.592405  | coding    |
| 1         | coding    |
| 0.950221  | coding    |
| 1         | coding    |
| 0.999279  | coding    |
| 0.0265496 | noncoding |
| 0.0388194 | noncoding |
| 1         | coding    |
| 1         | coding    |
| 0.242657  | noncoding |
| 1         | coding    |
| 1         | coding    |
| 1         | coding    |
| 0.0115584 | noncoding |

|            |           |
|------------|-----------|
| 0.540608   | coding    |
| 1          | coding    |
| 1          | coding    |
| 0.100809   | noncoding |
| 0.339482   | noncoding |
| 0.0163477  | noncoding |
| 1          | coding    |
| 0.555381   | coding    |
| 1          | coding    |
| 1          | coding    |
| 0.118521   | noncoding |
| 1          | coding    |
| 0.495233   | noncoding |
| 0.229276   | noncoding |
| 0.228461   | noncoding |
| 1          | coding    |
| 0.0822111  | noncoding |
| 0.0622376  | noncoding |
| 1          | coding    |
| 1          | coding    |
| 0.00526184 | noncoding |
| 1          | coding    |
| 1          | coding    |
| 1          | coding    |
| 0.961774   | coding    |
| 0.144002   | noncoding |
| 1          | coding    |
| 0.998041   | coding    |
| 0.0467901  | noncoding |
| 1          | coding    |
| 0.970276   | coding    |
| 1          | coding    |
| 1          | coding    |
| 1          | coding    |
| 0.999995   | coding    |
| 0.973044   | coding    |
| 0.0306742  | noncoding |
| 0.667385   | coding    |
| 0.130519   | noncoding |
| 0.973709   | coding    |
| 0.178271   | noncoding |
| 0.999998   | coding    |
| 0.999976   | coding    |
| 0.999949   | coding    |

|            |           |
|------------|-----------|
| 0.999995   | coding    |
| 0.999999   | coding    |
| 0.999642   | coding    |
| 0.997937   | coding    |
| 1          | coding    |
| 0.224928   | noncoding |
| 1          | coding    |
| 0.220327   | noncoding |
| 0.0415553  | noncoding |
| 0.259865   | noncoding |
| 0.0505057  | noncoding |
| 0.759397   | coding    |
| 0.388637   | noncoding |
| 0.156443   | noncoding |
| 0.0682139  | noncoding |
| 1          | coding    |
| 1          | coding    |
| 1          | coding    |
| 0.152629   | noncoding |
| 0.00206017 | noncoding |
| 0.156655   | noncoding |
| 0.997867   | coding    |
| 0.998412   | coding    |
| 0.999759   | coding    |
| 0.942906   | coding    |
| 0.083404   | noncoding |
| 0.132767   | noncoding |
| 0.0752098  | noncoding |
| 1          | coding    |
| 0.742118   | coding    |
| 0.481667   | noncoding |
| 0.87377    | coding    |
| 0.180332   | noncoding |
| 0.999996   | coding    |
| 0.655222   | coding    |
| 0.24286    | noncoding |
| 0.0195469  | noncoding |
| 0.027369   | noncoding |
| 1          | coding    |
| 1          | coding    |
| 0.979484   | coding    |
| 0.866993   | coding    |
| 0.913477   | coding    |
| 1          | coding    |
| 0.999999   | coding    |
| 0.152181   | noncoding |
| 0.253697   | noncoding |
| 0.823418   | coding    |



|           |           |
|-----------|-----------|
| 0.135471  | noncoding |
| 0.135471  | noncoding |
| 0.995098  | coding    |
| 0.0550361 | noncoding |
| 0.0297566 | noncoding |
| 0.476068  | noncoding |
| 0.33445   | noncoding |
| 1         | coding    |
| 0.980281  | coding    |
| 0.0563039 | noncoding |
| 0.279694  | noncoding |
| 0.026274  | noncoding |
| 0.999875  | coding    |
| 0.0811816 | noncoding |
| 0.0822928 | noncoding |
| 0.125144  | noncoding |
| 0.0304544 | noncoding |
| 0.0259507 | noncoding |
| 0.0702386 | noncoding |
| 0.0702386 | noncoding |
| 0.0731115 | noncoding |
| 0.0918717 | noncoding |
| 0.541789  | coding    |
| 1         | coding    |
| 1         | coding    |
| 0.99299   | coding    |
| 0.657706  | coding    |
| 0.0076795 | noncoding |
| 1         | coding    |
| 1         | coding    |
| 0.811301  | coding    |
| 1         | coding    |
| 0.999747  | coding    |
| 0.907836  | coding    |
| 0.0420584 | noncoding |
| 0.552852  | coding    |
| 0.23811   | noncoding |
| 0.271298  | noncoding |
| 0.702963  | coding    |
| 0.502886  | coding    |
| 0.869486  | coding    |
| 0.0473445 | noncoding |
| 0.0845872 | noncoding |
| 0.963173  | coding    |
| 0.89419   | coding    |
| 0.999994  | coding    |
| 0.999705  | coding    |
| 0.699575  | coding    |
| 0.0923418 | noncoding |
| 1         | coding    |
| 0.999973  | coding    |
| 1         | coding    |
| 1         | coding    |
| 1         | coding    |

|           |           |
|-----------|-----------|
| 1         | coding    |
| 0.0941615 | noncoding |
| 1         | coding    |
| 0.474443  | noncoding |
| 0.992196  | coding    |
| 0.999408  | coding    |
| 0.986656  | coding    |
| 0.0735893 | noncoding |
| 1         | coding    |
| 1         | coding    |
| 0.126343  | noncoding |
| 0.728002  | coding    |
| 0.686922  | coding    |
| 0.0318144 | noncoding |
| 0.159723  | noncoding |
| 0.0145998 | noncoding |
| 0.0446396 | noncoding |
| 1         | coding    |
| 1         | coding    |
| 0.0832888 | noncoding |
| 1         | coding    |
| 0.295216  | noncoding |
| 0.998799  | coding    |
| 0.998355  | coding    |
| 0.998619  | coding    |
| 0.99947   | coding    |
| 0.99947   | coding    |
| 0.0712309 | noncoding |
| 1         | coding    |
| 1         | coding    |
| 0.527214  | coding    |
| 0.570717  | coding    |
| 0.243803  | noncoding |
| 1         | coding    |
| 0.999497  | coding    |
| 1         | coding    |
| 1         | coding    |
| 0.964729  | coding    |
| 0.999922  | coding    |
| 1         | coding    |
| 0.0534268 | noncoding |
| 0.93735   | coding    |
| 0.999998  | coding    |
| 0.999748  | coding    |
| 0.999999  | coding    |
| 0.999999  | coding    |

[illegible]

|           |           |
|-----------|-----------|
| 0.98448   | coding    |
| 0.517284  | coding    |
| 0.295987  | noncoding |
| 0.603252  | coding    |
| 0.613456  | coding    |
| 0.364805  | noncoding |
| 1         | coding    |
| 0.999993  | coding    |
| 0.999993  | coding    |
| 0.999999  | coding    |
| 1         | coding    |
| 1         | coding    |
| 0.165605  | noncoding |
| 1         | coding    |
| 0.79857   | coding    |
| 0.199676  | noncoding |
| 1         | coding    |
| 1         | coding    |
| 0.120915  | noncoding |
| 0.705018  | coding    |
| 1         | coding    |
| 0.9999    | coding    |
| 0.999992  | coding    |
| 0.992839  | coding    |
| 0.999995  | coding    |
| 0.999929  | coding    |
| 0.999929  | coding    |
| 1         | coding    |
| 0.320729  | noncoding |
| 0.734319  | coding    |
| 1         | coding    |
| 0.999998  | coding    |
| 0.999862  | coding    |
| 0.174817  | noncoding |
| 0.673366  | coding    |
| 0.495554  | noncoding |
| 1         | coding    |
| 1         | coding    |
| 0.999647  | coding    |
| 0.983988  | coding    |
| 0.961644  | coding    |
| 0.242583  | noncoding |
| 0.94377   | coding    |
| 0.0365936 | noncoding |
| 0.755011  | coding    |
| 0.721344  | coding    |
| 0.0717826 | noncoding |
| 0.999996  | coding    |

|            |           |
|------------|-----------|
| 1          | coding    |
| 0.980527   | coding    |
| 0.0702345  | noncoding |
| 0.468004   | noncoding |
| 1          | coding    |
| 1          | coding    |
| 0.72043    | coding    |
| 0.784766   | coding    |
| 1          | coding    |
| 0.0375568  | noncoding |
| 0.00776664 | noncoding |
| 0.999925   | coding    |
| 0.246499   | noncoding |
| 0.0358907  | noncoding |
| 0.999522   | coding    |
| 1          | coding    |
| 1          | coding    |
| 1          | coding    |
| 0.976261   | coding    |
| 1          | coding    |
| 0.999992   | coding    |
| 0.476171   | noncoding |
| 0.0249329  | noncoding |
| 1          | coding    |
| 0.999479   | coding    |
| 0.729736   | coding    |
| 1          | coding    |
| 1          | coding    |
| 0.0539472  | noncoding |
| 1          | coding    |
| 0.00406678 | noncoding |
| 0.027338   | noncoding |
| 1          | coding    |
| 0.0435795  | noncoding |
| 1          | coding    |
| 0.999974   | coding    |
| 1          | coding    |
| 0.0527521  | noncoding |
| 0.0604926  | noncoding |
| 1          | coding    |
| 0.294831   | noncoding |

|           |           |
|-----------|-----------|
| 0.445455  | noncoding |
| 1         | coding    |
| 0.977339  | coding    |
| 1         | coding    |
| 0.0644277 | noncoding |
| 0.88977   | coding    |
| 0.136708  | noncoding |
| 0.622245  | coding    |
| 0.0448897 | noncoding |
| 0.0336083 | noncoding |
| 0.166164  | noncoding |
| 0.0266581 | noncoding |
| 0.979176  | coding    |
| 0.939407  | coding    |
| 0.989475  | coding    |
| 0.0247669 | noncoding |
| 1         | coding    |
| 0.994016  | coding    |
| 1         | coding    |
| 0.0592815 | noncoding |
| 0.0244906 | noncoding |
| 0.0274227 | noncoding |
| 1         | coding    |
| 1         | coding    |
| 0.0507385 | noncoding |
| 0.999978  | coding    |
| 0.999488  | coding    |
| 0.999583  | coding    |
| 0.999488  | coding    |
| 0.999597  | coding    |
| 1         | coding    |
| 0.0662338 | noncoding |
| 0.302828  | noncoding |
| 1         | coding    |
| 0.0318324 | noncoding |
| 1         | coding    |
| 0.997569  | coding    |
| 0.997429  | coding    |
| 1         | coding    |

|            |           |
|------------|-----------|
| 0.0901598  | noncoding |
| 1          | coding    |
| 0.0726141  | noncoding |
| 0.999999   | coding    |
| 0.0168851  | noncoding |
| 1          | coding    |
| 1          | coding    |
| 0.127317   | noncoding |
| 0.717731   | coding    |
| 0.0725523  | noncoding |
| 0.10999    | noncoding |
| 0.0825299  | noncoding |
| 0.993012   | coding    |
| 0.169022   | noncoding |
| 0.651194   | coding    |
| 0.393427   | noncoding |
| 0.00286172 | noncoding |
| 0.0495806  | noncoding |
| 0.0198915  | noncoding |
| 0.0588782  | noncoding |
| 0.0281143  | noncoding |
| 0.0239785  | noncoding |
| 0.129777   | noncoding |
| 0.0326081  | noncoding |
| 0.998986   | coding    |
| 0.0234523  | noncoding |
| 0.15396    | noncoding |
| 0.129231   | noncoding |
| 0.099244   | noncoding |
| 0.0556991  | noncoding |
| 0.0563452  | noncoding |
| 0.00551606 | noncoding |
| 0.961219   | coding    |
| 0.146681   | noncoding |
| 0.00756622 | noncoding |
| 0.0562312  | noncoding |
| 0.00481194 | noncoding |
| 0.999968   | coding    |
| 1          | coding    |
| 0.282867   | noncoding |
| 1          | coding    |
| 0.999982   | coding    |
| 0.371919   | noncoding |
| 0.283588   | noncoding |
| 0.0556681  | noncoding |
| 0.999998   | coding    |
| 0.999997   | coding    |
| 1          | coding    |
| 0.223525   | noncoding |
| 1          | coding    |
| 1          | coding    |

|           |           |
|-----------|-----------|
| 0.999845  | coding    |
| 0.0337973 | noncoding |
| 0.999999  | coding    |
| 1         | coding    |
| 1         | coding    |
| 0.996012  | coding    |
| 0.999997  | coding    |
| 0.0386041 | noncoding |
| 0.141885  | noncoding |
| 0.0515863 | noncoding |
| 0.122011  | noncoding |
| 0.0597743 | noncoding |
| 0.948176  | coding    |
| 0.0468204 | noncoding |
| 0.979496  | coding    |
| 0.0578051 | noncoding |
| 0.0644112 | noncoding |
| 0.12168   | noncoding |
| 0.202266  | noncoding |
| 1         | coding    |
| 0.317087  | noncoding |
| 1         | coding    |
| 0.0193729 | noncoding |
| 1         | coding    |
| 0.997923  | coding    |
| 0.826392  | coding    |
| 0.0135574 | noncoding |
| 0.126487  | noncoding |
| 0.995817  | coding    |
| 0.73621   | coding    |
| 1         | coding    |
| 0.633571  | coding    |
| 0.964845  | coding    |
| 0.991867  | coding    |
| 1         | coding    |
| 1         | coding    |
| 1         | coding    |
| 0.820659  | coding    |
| 0.452091  | noncoding |
| 0.0721297 | noncoding |
| 1         | coding    |
| 1         | coding    |
| 1         | coding    |
| 0.0898851 | noncoding |
| 0.999999  | coding    |
| 0.63086   | coding    |
| 0.259927  | noncoding |
| 0.0851212 | noncoding |
| 1         | coding    |



|            |           |
|------------|-----------|
| 1          | coding    |
| 0.0116841  | noncoding |
| 1          | coding    |
| 0.0151637  | noncoding |
| 1          | coding    |
| 0.037691   | noncoding |
| 1          | coding    |
| 1          | coding    |
| 0.991216   | coding    |
| 0.024989   | noncoding |
| 0.296529   | noncoding |
| 0.144873   | noncoding |
| 1          | coding    |
| 0.934249   | coding    |
| 0.00223582 | noncoding |
| 1          | coding    |
| 1          | coding    |
| 1          | coding    |
| 0.0438856  | noncoding |
| 0.070081   | noncoding |
| 0.539238   | coding    |
| 0.0377967  | noncoding |
| 0.998936   | coding    |
| 0.0579077  | noncoding |
| 0.999999   | coding    |
| 1          | coding    |
| 0.0555493  | noncoding |
| 0.995754   | coding    |
| 0.869514   | coding    |
| 0.523332   | coding    |
| 0.0737074  | noncoding |
| 0.0642421  | noncoding |
| 0.517371   | coding    |
| 0.317907   | noncoding |
| 0.56445    | coding    |
| 0.610253   | coding    |
| 0.0621511  | noncoding |
| 0.281893   | noncoding |
| 0.807515   | coding    |
| 0.0848922  | noncoding |
| 1          | coding    |
| 1          | coding    |
| 0.988738   | coding    |
| 0.114693   | noncoding |
| 1          | coding    |
| 0.967375   | coding    |

|            |           |
|------------|-----------|
| 0.953313   | coding    |
| 1          | coding    |
| 1          | coding    |
| 0.999994   | coding    |
| 1          | coding    |
| 0.571259   | coding    |
| 0.82808    | coding    |
| 0.175482   | noncoding |
| 0.991069   | coding    |
| 0.00186658 | noncoding |
| 0.397749   | noncoding |
| 0.448099   | noncoding |
| 0.00861178 | noncoding |
| 0.48487    | noncoding |
| 0.0149511  | noncoding |
| 0.999999   | coding    |
| 0.99989    | coding    |
| 1          | coding    |
| 0.366311   | noncoding |
| 0.871323   | coding    |
| 0.14496    | noncoding |
| 1          | coding    |
| 0.0173064  | noncoding |
| 0.998469   | coding    |
| 0.995294   | coding    |
| 0.999999   | coding    |
| 0.999327   | coding    |
| 0.998511   | coding    |
| 0.999997   | coding    |
| 0.263092   | noncoding |
| 0.43462    | noncoding |
| 0.752531   | coding    |
| 0.0405324  | noncoding |
| 0.122345   | noncoding |
| 0.915652   | coding    |
| 0.985285   | coding    |
| 0.99905    | coding    |
| 0.556233   | coding    |
| 0.489043   | noncoding |
| 0.999976   | coding    |
| 0.0592253  | noncoding |
| 0.0273597  | noncoding |
| 0.137944   | noncoding |
| 1          | coding    |
| 1          | coding    |

|            |           |
|------------|-----------|
| 0.0285711  | noncoding |
| 1          | coding    |
| 0.915375   | coding    |
| 0.880837   | coding    |
| 0.99188    | coding    |
| 0.940443   | coding    |
| 0.99993    | coding    |
| 0.831981   | coding    |
| 0.0649572  | noncoding |
| 0.0552252  | noncoding |
| 0.924208   | coding    |
| 0.034203   | noncoding |
| 1          | coding    |
| 0.999977   | coding    |
| 0.99997    | coding    |
| 0.999984   | coding    |
| 0.0148598  | noncoding |
| 1          | coding    |
| 0.00639986 | noncoding |
| 0.163307   | noncoding |
| 0.166628   | noncoding |
| 0.161406   | noncoding |
| 0.16701    | noncoding |
| 0.164861   | noncoding |
| 0.0419806  | noncoding |
| 1          | coding    |
| 0.992766   | coding    |
| 0.309107   | noncoding |
| 0.0761217  | noncoding |
| 0.0255848  | noncoding |
| 0.11755    | noncoding |
| 0.999493   | coding    |
| 1          | coding    |
| 0.890328   | coding    |
| 0.999991   | coding    |
| 0.96172    | coding    |
| 0.964306   | coding    |
| 0.772937   | coding    |
| 0.140598   | noncoding |
| 0.225154   | noncoding |
| 1          | coding    |
| 0.448837   | noncoding |

|           |           |
|-----------|-----------|
| 0.0183122 | noncoding |
| 0.999381  | coding    |
| 0.999865  | coding    |
| 0.926844  | coding    |
| 0.999993  | coding    |
| 0.991134  | coding    |
| 1         | coding    |
| 0.0998481 | noncoding |
| 1         | coding    |
| 0.326457  | noncoding |
| 0.0682584 | noncoding |
| 0.0240586 | noncoding |
| 1         | coding    |
| 0.10502   | noncoding |
| 0.0209772 | noncoding |
| 0.2719    | noncoding |
| 0.99981   | coding    |
| 1         | coding    |
| 1         | coding    |
| 0.99923   | coding    |
| 1         | coding    |
| 0.999998  | coding    |
| 0.999823  | coding    |
| 1         | coding    |
| 1         | coding    |
| 1         | coding    |
| 0.463053  | noncoding |
| 0.195027  | noncoding |
| 0.994915  | coding    |
| 0.685038  | coding    |
| 0.999117  | coding    |
| 0.999071  | coding    |
| 0.0354267 | noncoding |
| 1         | coding    |
| 0.0138593 | noncoding |
| 1         | coding    |
| 1         | coding    |
| 1         | coding    |
| 0.315616  | noncoding |
| 0.0993767 | noncoding |
| 0.187652  | noncoding |
| 0.0676777 | noncoding |
| 0.0179633 | noncoding |
| 1         | coding    |
| 0.658372  | coding    |
| 1         | coding    |
| 0.999966  | coding    |
| 0.658372  | coding    |
| 0.658372  | coding    |
| 0.654989  | coding    |
| 0.658372  | coding    |
| 0.658372  | coding    |
| 0.653397  | coding    |
| 0.654989  | coding    |

|            |           |
|------------|-----------|
| 0.654989   | coding    |
| 0.650537   | coding    |
| 0.999998   | coding    |
| 1          | coding    |
| 0.636699   | coding    |
| 0.0372199  | noncoding |
| 1          | coding    |
| 0.790764   | coding    |
| 0.906003   | coding    |
| 0.689417   | coding    |
| 0.844747   | coding    |
| 1          | coding    |
| 0.101718   | noncoding |
| 0.00274865 | noncoding |
| 0.00795437 | noncoding |
| 1          | coding    |
| 1          | coding    |
| 0.0872133  | noncoding |
| 1          | coding    |
| 0.932749   | coding    |
| 0.057385   | noncoding |
| 0.162696   | noncoding |
| 0.460573   | noncoding |
| 0.828124   | coding    |
| 0.414104   | noncoding |
| 1          | coding    |
| 1          | coding    |
| 0.978864   | coding    |
| 0.996495   | coding    |
| 0.281926   | noncoding |
| 0.0648433  | noncoding |
| 0.0382257  | noncoding |
| 0.0860728  | noncoding |
| 0.176614   | noncoding |
| 0.0239162  | noncoding |
| 0.99953    | coding    |
| 0.397721   | noncoding |
| 0.427188   | noncoding |
| 0.298694   | noncoding |
| 0.0464778  | noncoding |
| 0.186529   | noncoding |
| 0.177805   | noncoding |
| 0.999934   | coding    |
| 0.958023   | coding    |
| 0.953192   | coding    |

|           |           |
|-----------|-----------|
| 0.976022  | coding    |
| 0.999995  | coding    |
| 0.173486  | noncoding |
| 0.385203  | noncoding |
| 1         | coding    |
| 1         | coding    |
| 1         | coding    |
| 0.999111  | coding    |
| 1         | coding    |
| 1         | coding    |
| 0.999967  | coding    |
| 0.999999  | coding    |
| 1         | coding    |
| 0.0293281 | noncoding |
| 0.318566  | noncoding |
| 0.430499  | noncoding |
| 0.889882  | coding    |
| 0.575923  | coding    |
| 0.763171  | coding    |
| 1         | coding    |
| 0.342016  | noncoding |
| 0.432009  | noncoding |
| 0.914386  | coding    |
| 0.191301  | noncoding |
| 0.972996  | coding    |
| 0.176988  | noncoding |
| 0.928453  | coding    |
| 0.0769934 | noncoding |
| 0.864907  | coding    |
| 0.0461829 | noncoding |
| 0.394063  | noncoding |
| 1         | coding    |
| 0.0403341 | noncoding |
| 0.999994  | coding    |
| 1         | coding    |
| 0.0384958 | noncoding |
| 1         | coding    |
| 0.26497   | noncoding |
| 1         | coding    |
| 0.0200176 | noncoding |
| 0.0137756 | noncoding |
| 1         | coding    |
| 1         | coding    |
| 0.0197966 | noncoding |

|           |           |
|-----------|-----------|
| 0.999353  | coding    |
| 0.989315  | coding    |
| 0.208504  | noncoding |
| 0.999351  | coding    |
| 0.999956  | coding    |
| 0.999859  | coding    |
| 0.999863  | coding    |
| 0.999841  | coding    |
| 0.999194  | coding    |
| 0.999957  | coding    |
| 0.999992  | coding    |
| 0.999996  | coding    |
| 0.20649   | noncoding |
| 0.292235  | noncoding |
| 0.0529932 | noncoding |
| 0.17782   | noncoding |
| 0.999975  | coding    |
| 0.011535  | noncoding |
| 1         | coding    |
| 0.0738396 | noncoding |
| 1         | coding    |
| 1         | coding    |
| 0.996187  | coding    |
| 0.916898  | coding    |
| 1         | coding    |
| 1         | coding    |
| 0.0128879 | noncoding |
| 0.823073  | coding    |
| 0.626428  | coding    |
| 0.275013  | noncoding |
| 0.124089  | noncoding |
| 0.0453466 | noncoding |
| 0.0594811 | noncoding |
| 0.999997  | coding    |
| 0.194946  | noncoding |
| 0.994981  | coding    |
| 0.999977  | coding    |
| 1         | coding    |
| 1         | coding    |
| 1         | coding    |
| 0.99981   | coding    |
| 1         | coding    |
| 0.999994  | coding    |
| 0.376316  | noncoding |
| 0.125113  | noncoding |
| 1         | coding    |
| 0.859511  | coding    |
| 0.741503  | coding    |
| 0.259119  | noncoding |
| 1         | coding    |
| 0.0529092 | noncoding |
| 0.140522  | noncoding |
| 0.224142  | noncoding |
| 0.335817  | noncoding |

|           |           |
|-----------|-----------|
| 0.28433   | noncoding |
| 1         | coding    |
| 1         | coding    |
| 0.599023  | coding    |
| 0.225156  | noncoding |
| 0.260351  | noncoding |
| 0.601235  | coding    |
| 0.999994  | coding    |
| 1         | coding    |
| 0.999999  | coding    |
| 0.10361   | noncoding |
| 0.0606122 | noncoding |
| 1         | coding    |
| 1         | coding    |
| 1         | coding    |
| 0.0118634 | noncoding |
| 0.0231066 | noncoding |
| 1         | coding    |
| 0.175752  | noncoding |
| 0.0949241 | noncoding |
| 0.269591  | noncoding |
| 1         | coding    |
| 1         | coding    |
| 1         | coding    |
| 0.999201  | coding    |
| 0.153131  | noncoding |
| 1         | coding    |
| 0.963612  | coding    |
| 1         | coding    |
| 0.0778489 | noncoding |
| 0.202567  | noncoding |
| 0.167944  | noncoding |
| 0.295103  | noncoding |
| 0.191112  | noncoding |
| 0.0941395 | noncoding |
| 0.0612002 | noncoding |
| 0.999976  | coding    |
| 1         | coding    |



[illegible]

|            |           |
|------------|-----------|
| 1          | coding    |
| 0.112502   | noncoding |
| 0.846519   | coding    |
| 1          | coding    |
| 1          | coding    |
| 0.815131   | coding    |
| 0.999868   | coding    |
| 0.236499   | noncoding |
| 0.00798619 | noncoding |
| 0.0274463  | noncoding |
| 0.0930266  | noncoding |
| 0.075741   | noncoding |
| 0.0272516  | noncoding |
| 1          | coding    |
| 0.112314   | noncoding |
| 0.104005   | noncoding |
| 1          | coding    |
| 0.997747   | coding    |
| 1          | coding    |
| 0.999972   | coding    |
| 0.999981   | coding    |
| 1          | coding    |
| 0.0930823  | noncoding |
| 0.903387   | coding    |
| 0.37842    | noncoding |
| 1          | coding    |
| 1          | coding    |
| 1          | coding    |
| 0.0697638  | noncoding |
| 0.786201   | coding    |
| 0.0946634  | noncoding |
| 0.106439   | noncoding |
| 1          | coding    |
| 0.120798   | noncoding |
| 1          | coding    |
| 1          | coding    |
| 0.00791443 | noncoding |
| 0.00753395 | noncoding |
| 0.0133105  | noncoding |
| 0.999999   | coding    |
| 0.999999   | coding    |
| 1          | coding    |
| 1          | coding    |
| 0.999948   | coding    |
| 0.20285    | noncoding |
| 0.193398   | noncoding |
| 1          | coding    |
| 1          | coding    |
| 1          | coding    |
| 0.963948   | coding    |
| 0.978825   | coding    |
| 1          | coding    |
| 1          | coding    |
| 0.04242    | noncoding |

|            |           |
|------------|-----------|
| 0.0422686  | noncoding |
| 1          | coding    |
| 0.271122   | noncoding |
| 0.0117147  | noncoding |
| 0.963718   | coding    |
| 0.999998   | coding    |
| 0.999934   | coding    |
| 1          | coding    |
| 1          | coding    |
| 0.190147   | noncoding |
| 1          | coding    |
| 1          | coding    |
| 0.999999   | coding    |
| 0.00862605 | noncoding |
| 1          | coding    |
| 0.0135415  | noncoding |
| 0.145751   | noncoding |
| 0.0356809  | noncoding |
| 0.925138   | coding    |
| 0.463959   | noncoding |
| 1          | coding    |
| 1          | coding    |
| 0.483634   | noncoding |
| 0.999991   | coding    |
| 0.0475521  | noncoding |
| 0.0304585  | noncoding |
| 0.0460749  | noncoding |
| 0.159507   | noncoding |
| 0.999992   | coding    |
| 1          | coding    |
| 0.751074   | coding    |
| 0.990222   | coding    |
| 0.304422   | noncoding |
| 0.999892   | coding    |
| 1          | coding    |
| 1          | coding    |
| 1          | coding    |
| 0.27373    | noncoding |
| 0.997979   | coding    |
| 1          | coding    |
| 1          | coding    |
| 0.750843   | coding    |
| 0.031893   | noncoding |
| 0.767856   | coding    |
| 1          | coding    |
| 0.999997   | coding    |
| 0.999629   | coding    |
| 0.998072   | coding    |
| 0.998561   | coding    |
| 0.0606792  | noncoding |

|            |           |
|------------|-----------|
| 0.147958   | noncoding |
| 0.162189   | noncoding |
| 0.174187   | noncoding |
| 0.772385   | coding    |
| 1          | coding    |
| 0.0410899  | noncoding |
| 0.294043   | noncoding |
| 0.123658   | noncoding |
| 0.6013     | coding    |
| 0.376896   | noncoding |
| 0.636505   | coding    |
| 0.0134013  | noncoding |
| 0.0241801  | noncoding |
| 0.835004   | coding    |
| 0.03874    | noncoding |
| 0.0259354  | noncoding |
| 1          | coding    |
| 0.0281638  | noncoding |
| 0.40651    | noncoding |
| 1          | coding    |
| 0.999999   | coding    |
| 1          | coding    |
| 1          | coding    |
| 0.210751   | noncoding |
| 0.0111285  | noncoding |
| 0.122319   | noncoding |
| 0.99978    | coding    |
| 0.999862   | coding    |
| 0.999856   | coding    |
| 0.937127   | coding    |
| 0.0972568  | noncoding |
| 1          | coding    |
| 0.0285595  | noncoding |
| 0.00612942 | noncoding |
| 0.996513   | coding    |
| 0.0140954  | noncoding |
| 0.0292858  | noncoding |

|            |           |
|------------|-----------|
| 1          | coding    |
| 1          | coding    |
| 0.0325684  | noncoding |
| 0.215306   | noncoding |
| 0.968102   | coding    |
| 0.998036   | coding    |
| 0.0149471  | noncoding |
| 0.0509476  | noncoding |
| 0.323906   | noncoding |
| 1          | coding    |
| 0.0743261  | noncoding |
| 0.0253631  | noncoding |
| 0.18972    | noncoding |
| 1          | coding    |
| 1          | coding    |
| 0.00500455 | noncoding |
| 1          | coding    |
| 1          | coding    |
| 0.598626   | coding    |
| 0.408629   | noncoding |
| 0.0313696  | noncoding |
| 0.309674   | noncoding |
| 1          | coding    |
| 1          | coding    |
| 0.994801   | coding    |
| 0.106302   | noncoding |
| 0.0488491  | noncoding |
| 0.0455076  | noncoding |
| 0.00599769 | noncoding |
| 1          | coding    |
| 1          | coding    |
| 0.220347   | noncoding |
| 1          | coding    |
| 0.0487779  | noncoding |
| 0.78991    | coding    |
| 1          | coding    |
| 0.999963   | coding    |
| 0.999995   | coding    |
| 0.999921   | coding    |
| 0.0366843  | noncoding |
| 0.617551   | coding    |
| 1          | coding    |
| 0.0829067  | noncoding |
| 0.320769   | noncoding |
| 0.982004   | coding    |
| 0.522873   | coding    |
| 0.0663986  | noncoding |
| 0.606871   | coding    |
| 0.10016    | noncoding |
| 0.248198   | noncoding |
| 0.182759   | noncoding |

|            |           |
|------------|-----------|
| 0.0619179  | noncoding |
| 0.946262   | coding    |
| 0.999998   | coding    |
| 0.999988   | coding    |
| 0.0428304  | noncoding |
| 0.968476   | coding    |
| 1          | coding    |
| 1          | coding    |
| 1          | coding    |
| 0.0397532  | noncoding |
| 1          | coding    |
| 0.999992   | coding    |
| 0.154244   | noncoding |
| 1          | coding    |
| 0.802804   | coding    |
| 0.0515963  | noncoding |
| 0.983271   | coding    |
| 0.00629083 | noncoding |
| 0.00720527 | noncoding |
| 0.0568426  | noncoding |
| 0.0226639  | noncoding |
| 1          | coding    |
| 0.0385565  | noncoding |
| 1          | coding    |
| 0.417663   | noncoding |
| 0.0441629  | noncoding |
| 0.978127   | coding    |
| 0.227632   | noncoding |
| 0.076241   | noncoding |
| 0.224161   | noncoding |
| 0.20243    | noncoding |
| 1          | coding    |
| 1          | coding    |
| 0.706364   | coding    |
| 0.110678   | noncoding |
| 1          | coding    |
| 1          | coding    |
| 0.0786493  | noncoding |
| 0.061694   | noncoding |
| 1          | coding    |
| 1          | coding    |
| 0.935693   | coding    |
| 0.247635   | noncoding |
| 0.0707787  | noncoding |
| 0.999996   | coding    |
| 0.997784   | coding    |
| 0.999891   | coding    |
| 0.999927   | coding    |
| 0.999698   | coding    |

|           |           |
|-----------|-----------|
| 1         | coding    |
| 1         | coding    |
| 1         | coding    |
| 0.276794  | noncoding |
| 0.966893  | coding    |
| 0.0439851 | noncoding |
| 0.746572  | coding    |
| 0.0910035 | noncoding |
| 1         | coding    |
| 0.0367888 | noncoding |
| 0.553108  | coding    |
| 0.571914  | coding    |
| 0.277812  | noncoding |
| 0.0945077 | noncoding |
| 1         | coding    |
| 0.745669  | coding    |
| 0.538599  | coding    |
| 0.0470139 | noncoding |
| 0.134113  | noncoding |
| 0.0614851 | noncoding |
| 1         | coding    |
| 0.900375  | coding    |
| 0.156778  | noncoding |
| 1         | coding    |
| 1         | coding    |
| 1         | coding    |
| 0.0939133 | noncoding |
| 0.999444  | coding    |
| 0.999512  | coding    |
| 1         | coding    |
| 1         | coding    |
| 0.406317  | noncoding |
| 1         | coding    |
| 0.0286861 | noncoding |
| 1         | coding    |
| 0.26412   | noncoding |
| 1         | coding    |
| 1         | coding    |
| 1         | coding    |
| 0.0276066 | noncoding |
| 1         | coding    |
| 0.997644  | coding    |
| 0.982557  | coding    |
| 0.994054  | coding    |
| 0.584813  | coding    |
| 0.0262534 | noncoding |
| 1         | coding    |

|           |           |
|-----------|-----------|
| 1         | coding    |
| 1         | coding    |
| 0.0053967 | noncoding |
| 0.202699  | noncoding |
| 0.736674  | coding    |
| 0.0300171 | noncoding |
| 0.0907945 | noncoding |
| 0.197773  | noncoding |
| 0.0290874 | noncoding |
| 0.015634  | noncoding |
| 0.0464257 | noncoding |
| 0.102819  | noncoding |
| 0.953532  | coding    |
| 1         | coding    |
| 0.0942324 | noncoding |
| 0.755902  | coding    |
| 0.0463724 | noncoding |
| 0.374875  | noncoding |
| 0.999985  | coding    |
| 0.999691  | coding    |
| 0.998812  | coding    |
| 0.998854  | coding    |
| 0.998736  | coding    |
| 0.979867  | coding    |
| 0.442467  | noncoding |
| 0.0575819 | noncoding |
| 1         | coding    |
| 0.0378547 | noncoding |
| 0.999992  | coding    |
| 1         | coding    |
| 0.539549  | coding    |
| 1         | coding    |
| 1         | coding    |
| 0.484933  | noncoding |
| 1         | coding    |
| 1         | coding    |
| 0.0252469 | noncoding |
| 1         | coding    |
| 1         | coding    |
| 0.999999  | coding    |
| 0.182285  | noncoding |
| 0.996809  | coding    |
| 0.338367  | noncoding |
| 0.116697  | noncoding |
| 1         | coding    |
| 0.227741  | noncoding |
| 0.999998  | coding    |
| 1         | coding    |
| 0.669688  | coding    |
| 0.126651  | noncoding |
| 0.0744764 | noncoding |



|            |           |
|------------|-----------|
| 0.259227   | noncoding |
| 0.762612   | coding    |
| 0.324466   | noncoding |
| 0.622887   | coding    |
| 0.158674   | noncoding |
| 0.554331   | coding    |
| 0.405389   | noncoding |
| 0.405389   | noncoding |
| 0.126173   | noncoding |
| 0.126173   | noncoding |
| 0.1302     | noncoding |
| 0.612276   | coding    |
| 0.620722   | coding    |
| 0.0609246  | noncoding |
| 0.151075   | noncoding |
| 0.167738   | noncoding |
| 0.075311   | noncoding |
| 0.921443   | coding    |
| 0.585877   | coding    |
| 0.553944   | coding    |
| 1          | coding    |
| 0.160995   | noncoding |
| 0.999937   | coding    |
| 0.99176    | coding    |
| 0.194383   | noncoding |
| 0.0171669  | noncoding |
| 0.994279   | coding    |
| 0.999989   | coding    |
| 0.385898   | noncoding |
| 0.165589   | noncoding |
| 0.12375    | noncoding |
| 1          | coding    |
| 1          | coding    |
| 1          | coding    |
| 0.0115656  | noncoding |
| 0.630919   | coding    |
| 0.00592106 | noncoding |
| 0.0571844  | noncoding |
| 1          | coding    |
| 0.999881   | coding    |
| 0.997071   | coding    |
| 0.995149   | coding    |
| 0.980093   | coding    |
| 1          | coding    |
| 0.0244952  | noncoding |
| 0.0550902  | noncoding |
| 0.142987   | noncoding |
| 0.158415   | noncoding |
| 0.37751    | noncoding |
| 0.300273   | noncoding |
| 0.0454751  | noncoding |
| 0.999906   | coding    |
| 1          | coding    |
| 0.143381   | noncoding |

|           |           |
|-----------|-----------|
| 0.999855  | coding    |
| 0.0394453 | noncoding |
| 1         | coding    |
| 1         | coding    |
| 0.876272  | coding    |
| 0.99227   | coding    |
| 0.0627805 | noncoding |
| 0.76903   | coding    |
| 1         | coding    |
| 1         | coding    |
| 0.0189083 | noncoding |
| 0.196989  | noncoding |
| 0.999995  | coding    |
| 0.999066  | coding    |
| 0.998246  | coding    |
| 1         | coding    |
| 0.999499  | coding    |
| 0.999499  | coding    |
| 0.999493  | coding    |
| 0.999486  | coding    |
| 0.999478  | coding    |
| 0.999167  | coding    |
| 0.999449  | coding    |
| 0.99825   | coding    |
| 1         | coding    |
| 0.905362  | coding    |
| 1         | coding    |
| 0.873361  | coding    |
| 1         | coding    |
| 1         | coding    |
| 0.994588  | coding    |
| 0.970783  | coding    |
| 0.892247  | coding    |
| 0.999989  | coding    |
| 0.07939   | noncoding |
| 0.955899  | coding    |
| 0.963814  | coding    |
| 0.809614  | coding    |
| 0.637502  | coding    |
| 0.996402  | coding    |
| 0.369034  | noncoding |
| 0.130054  | noncoding |
| 0.0384091 | noncoding |
| 0.0377806 | noncoding |
| 1         | coding    |
| 1         | coding    |
| 0.394037  | noncoding |
| 0.044113  | noncoding |
| 0.0714811 | noncoding |
| 0.393013  | noncoding |
| 0.100979  | noncoding |

|            |           |
|------------|-----------|
| 0.551661   | coding    |
| 0.095126   | noncoding |
| 0.113598   | noncoding |
| 0.982867   | coding    |
| 0.790059   | coding    |
| 0.248844   | noncoding |
| 0.167991   | noncoding |
| 0.259958   | noncoding |
| 0.0643081  | noncoding |
| 0.0917931  | noncoding |
| 0.408144   | noncoding |
| 0.284282   | noncoding |
| 0.284282   | noncoding |
| 0.167183   | noncoding |
| 0.666328   | coding    |
| 0.167224   | noncoding |
| 0.971047   | coding    |
| 0.158332   | noncoding |
| 0.819858   | coding    |
| 0.982867   | coding    |
| 0.0594314  | noncoding |
| 0.152038   | noncoding |
| 0.076027   | noncoding |
| 0.0737587  | noncoding |
| 0.126263   | noncoding |
| 0.963142   | coding    |
| 1          | coding    |
| 0.508119   | coding    |
| 0.0427319  | noncoding |
| 0.0200572  | noncoding |
| 0.886756   | coding    |
| 0.118101   | noncoding |
| 0.17069    | noncoding |
| 0.00214538 | noncoding |
| 1          | coding    |
| 0.999515   | coding    |
| 1          | coding    |
| 0.999999   | coding    |
| 0.121978   | noncoding |
| 0.427262   | noncoding |
| 0.980802   | coding    |
| 1          | coding    |
| 0.210958   | noncoding |
| 0.0160723  | noncoding |
| 0.0571132  | noncoding |
| 1          | coding    |
| 0.048448   | noncoding |
| 0.974487   | coding    |
| 0.783332   | coding    |

|            |           |
|------------|-----------|
| 0.990721   | coding    |
| 0.981716   | coding    |
| 1          | coding    |
| 0.118727   | noncoding |
| 1          | coding    |
| 0.0208283  | noncoding |
| 1          | coding    |
| 0.999999   | coding    |
| 0.998453   | coding    |
| 0.229691   | noncoding |
| 0.0899565  | noncoding |
| 0.999998   | coding    |
| 0.998968   | coding    |
| 0.999969   | coding    |
| 1          | coding    |
| 0.310127   | noncoding |
| 0.55247    | coding    |
| 1          | coding    |
| 0.700063   | coding    |
| 0.999936   | coding    |
| 1          | coding    |
| 0.898742   | coding    |
| 1          | coding    |
| 0.953053   | coding    |
| 0.474782   | noncoding |
| 0.00331561 | noncoding |
| 0.976306   | coding    |
| 0.419392   | noncoding |
| 0.0813489  | noncoding |
| 1          | coding    |
| 1          | coding    |
| 1          | coding    |
| 0.0238216  | noncoding |
| 0.368442   | noncoding |
| 0.122128   | noncoding |
| 0.212347   | noncoding |
| 1          | coding    |
| 1          | coding    |
| 1          | coding    |
| 0.999999   | coding    |
| 1          | coding    |
| 1          | coding    |
| 0.988955   | coding    |
| 0.87354    | coding    |
| 0.999833   | coding    |
| 1          | coding    |
| 1          | coding    |
| 0.999967   | coding    |

|            |           |
|------------|-----------|
| 1          | coding    |
| 0.0141818  | noncoding |
| 0.0174414  | noncoding |
| 0.0197671  | noncoding |
| 0.00844261 | noncoding |
| 0.0143944  | noncoding |
| 0.0280941  | noncoding |
| 0.0350724  | noncoding |
| 0.0210722  | noncoding |
| 0.0225081  | noncoding |
| 0.0224941  | noncoding |
| 0.0259508  | noncoding |
| 0.0100101  | noncoding |
| 0.0271008  | noncoding |
| 0.368464   | noncoding |
| 0.0776519  | noncoding |
| 1          | coding    |
| 0.0387961  | noncoding |
| 0.99896    | coding    |
| 0.141864   | noncoding |
| 0.999873   | coding    |
| 0.0216097  | noncoding |
| 0.0865425  | noncoding |
| 0.686612   | coding    |
| 0.718775   | coding    |
| 0.366069   | noncoding |
| 1          | coding    |
| 1          | coding    |
| 0.106506   | noncoding |
| 0.328589   | noncoding |
| 1          | coding    |
| 1          | coding    |
| 0.043482   | noncoding |
| 0.0727411  | noncoding |
| 0.0348712  | noncoding |
| 0.023983   | noncoding |
| 0.999616   | coding    |
| 1          | coding    |
| 0.367012   | noncoding |
| 1          | coding    |
| 0.934556   | coding    |
| 0.158864   | noncoding |
| 0.0669679  | noncoding |
| 0.985011   | coding    |
| 0.958337   | coding    |
| 0.11888    | noncoding |
| 1          | coding    |
| 0.436313   | noncoding |
| 1          | coding    |
| 0.136089   | noncoding |
| 0.0666982  | noncoding |
| 0.0112916  | noncoding |
| 0.507133   | coding    |
| 1          | coding    |

|           |           |
|-----------|-----------|
| 1         | coding    |
| 0.108932  | noncoding |
| 0.0216195 | noncoding |
| 1         | coding    |
| 0.0386114 | noncoding |
| 0.285098  | noncoding |
| 0.41735   | noncoding |
| 1         | coding    |
| 0.0105401 | noncoding |
| 0.556625  | coding    |
| 1         | coding    |
| 0.998909  | coding    |
| 0.999887  | coding    |
| 1         | coding    |
| 0.013148  | noncoding |
| 0.955504  | coding    |
| 0.213216  | noncoding |
| 0.999999  | coding    |
| 0.999999  | coding    |
| 0.109212  | noncoding |
| 1         | coding    |
| 0.92776   | coding    |
| 0.984385  | coding    |
| 0.994463  | coding    |
| 1         | coding    |
| 0.999963  | coding    |
| 1         | coding    |
| 0.138609  | noncoding |
| 0.136464  | noncoding |
| 0.251524  | noncoding |
| 0.262672  | noncoding |
| 1         | coding    |
| 1         | coding    |
| 0.0267151 | noncoding |
| 1         | coding    |
| 1         | coding    |
| 0.991972  | coding    |
| 0.696051  | coding    |
| 1         | coding    |
| 1         | coding    |
| 0.147054  | noncoding |
| 0.125536  | noncoding |

|           |           |
|-----------|-----------|
| 0.281952  | noncoding |
| 0.460878  | noncoding |
| 0.710074  | coding    |
| 1         | coding    |
| 0.952051  | coding    |
| 0.999962  | coding    |
| 0.90183   | coding    |
| 0.174796  | noncoding |
| 0.0770688 | noncoding |
| 0.105605  | noncoding |
| 0.0041041 | noncoding |
| 0.27573   | noncoding |
| 0.999071  | coding    |
| 0.339396  | noncoding |
| 1         | coding    |
| 0.999996  | coding    |
| 0.0327321 | noncoding |
| 0.122205  | noncoding |
| 0.0363424 | noncoding |
| 0.0310625 | noncoding |
| 0.51505   | coding    |
| 0.175616  | noncoding |
| 1         | coding    |
| 1         | coding    |
| 0.999996  | coding    |
| 1         | coding    |
| 1         | coding    |
| 0.999923  | coding    |
| 0.999662  | coding    |
| 1         | coding    |
| 0.009889  | noncoding |
| 0.0038087 | noncoding |
| 0.0038462 | noncoding |
| 0.95737   | coding    |
| 0.0456852 | noncoding |
| 0.999951  | coding    |
| 1         | coding    |
| 0.0098489 | noncoding |
| 1         | coding    |
| 0.999998  | coding    |
| 0.999995  | coding    |
| 0.996625  | coding    |
| 0.999172  | coding    |
| 0.994019  | coding    |
| 0.996612  | coding    |
| 0.999993  | coding    |
| 1         | coding    |
| 0.999837  | coding    |
| 1         | coding    |
| 1         | coding    |

|            |           |
|------------|-----------|
| 1          | coding    |
| 1          | coding    |
| 0.0549458  | noncoding |
| 0.0625698  | noncoding |
| 0.047396   | noncoding |
| 0.0863227  | noncoding |
| 0.0790621  | noncoding |
| 1          | coding    |
| 1          | coding    |
| 1          | coding    |
| 0.0127738  | noncoding |
| 0.0141381  | noncoding |
| 0.988792   | coding    |
| 1          | coding    |
| 0.368282   | noncoding |
| 0.0183254  | noncoding |
| 0.0377712  | noncoding |
| 0.190232   | noncoding |
| 0.919077   | coding    |
| 0.669741   | coding    |
| 0.932511   | coding    |
| 1          | coding    |
| 1          | coding    |
| 0.997216   | coding    |
| 0.027058   | noncoding |
| 0.0214838  | noncoding |
| 0.185517   | noncoding |
| 0.222364   | noncoding |
| 0.197856   | noncoding |
| 0.970367   | coding    |
| 0.182907   | noncoding |
| 0.0258817  | noncoding |
| 1          | coding    |
| 1          | coding    |
| 1          | coding    |
| 0.00861689 | noncoding |
| 1          | coding    |
| 1          | coding    |
| 0.0685709  | noncoding |
| 1          | coding    |
| 0.0432777  | noncoding |
| 1          | coding    |



|           |           |
|-----------|-----------|
| 0.998705  | coding    |
| 0.213871  | noncoding |
| 1         | coding    |
| 1         | coding    |
| 1         | coding    |
| 0.0560075 | noncoding |
| 0.0562506 | noncoding |
| 0.999995  | coding    |
| 0.999965  | coding    |
| 0.999848  | coding    |
| 0.308878  | noncoding |
| 0.999844  | coding    |
| 0.99736   | coding    |
| 1         | coding    |
| 0.943105  | coding    |
| 0.0988921 | noncoding |
| 0.133636  | noncoding |
| 0.0812323 | noncoding |
| 1         | coding    |
| 0.999072  | coding    |
| 0.999997  | coding    |
| 0.271122  | noncoding |
| 0.999832  | coding    |
| 1         | coding    |
| 0.128945  | noncoding |
| 0.944665  | coding    |
| 1         | coding    |
| 1         | coding    |
| 0.850367  | coding    |
| 0.999633  | coding    |
| 0.984836  | coding    |
| 0.848587  | coding    |
| 0.0544088 | noncoding |
| 0.282557  | noncoding |
| 0.998852  | coding    |
| 1         | coding    |
| 0.917759  | coding    |
| 0.869715  | coding    |
| 0.494593  | noncoding |
| 0.254969  | noncoding |
| 0.657501  | coding    |
| 0.37484   | noncoding |
| 0.364197  | noncoding |
| 0.0946115 | noncoding |
| 0.584734  | coding    |

|           |           |
|-----------|-----------|
| 0.0754648 | noncoding |
| 0.0740239 | noncoding |
| 0.0211014 | noncoding |
| 0.33182   | noncoding |
| 0.521377  | coding    |
| 0.0441653 | noncoding |
| 0.013483  | noncoding |
| 0.0484646 | noncoding |
| 0.01203   | noncoding |
| 0.362256  | noncoding |
| 0.934766  | coding    |
| 1         | coding    |
| 0.0322091 | noncoding |
| 0.99999   | coding    |
| 0.999994  | coding    |
| 0.354498  | noncoding |
| 0.875384  | coding    |
| 0.0232727 | noncoding |
| 0.147839  | noncoding |
| 1         | coding    |
| 0.013384  | noncoding |
| 0.0673789 | noncoding |
| 0.999994  | coding    |
| 0.0335772 | noncoding |
| 1         | coding    |
| 0.0452322 | noncoding |
| 0.0982233 | noncoding |
| 0.0198925 | noncoding |
| 0.346116  | noncoding |
| 0.132464  | noncoding |
| 0.219277  | noncoding |
| 0.187135  | noncoding |
| 0.0139863 | noncoding |
| 1         | coding    |
| 0.996441  | coding    |
| 0.102083  | noncoding |
| 0.0246996 | noncoding |
| 0.251754  | noncoding |
| 0.0462815 | noncoding |
| 0.026746  | noncoding |
| 0.64319   | coding    |
| 0.864757  | coding    |
| 0.985487  | coding    |
| 1         | coding    |
| 1         | coding    |
| 0.0921653 | noncoding |
| 0.0146161 | noncoding |

|           |           |
|-----------|-----------|
| 0.999479  | coding    |
| 1         | coding    |
| 0.999999  | coding    |
| 0.998385  | coding    |
| 0.137917  | noncoding |
| 0.318125  | noncoding |
| 0.0345337 | noncoding |
| 0.0368275 | noncoding |
| 0.0377525 | noncoding |
| 0.0377525 | noncoding |
| 0.0368387 | noncoding |
| 0.0113698 | noncoding |
| 0.939687  | coding    |
| 1         | coding    |
| 0.140753  | noncoding |
| 0.0825497 | noncoding |
| 1         | coding    |
| 0.202998  | noncoding |
| 0.999997  | coding    |
| 0.699861  | coding    |
| 1         | coding    |
| 0.0146465 | noncoding |
| 0.0466737 | noncoding |

[illegible]

|            |           |
|------------|-----------|
| 1          | coding    |
| 0.348279   | noncoding |
| 0.217155   | noncoding |
| 1          | coding    |
| 0.0124909  | noncoding |
| 0.0552638  | noncoding |
| 0.999999   | coding    |
| 0.574021   | coding    |
| 0.0909378  | noncoding |
| 0.689119   | coding    |
| 1          | coding    |
| 1          | coding    |
| 1          | coding    |
| 0.9387     | coding    |
| 0.976394   | coding    |
| 0.907795   | coding    |
| 0.944207   | coding    |
| 1          | coding    |
| 0.999974   | coding    |
| 0.951376   | coding    |
| 0.933596   | coding    |
| 0.00270416 | noncoding |
| 1          | coding    |
| 0.0436618  | noncoding |
| 1          | coding    |
| 0.999278   | coding    |
| 0.994072   | coding    |
| 0.999992   | coding    |
| 0.999998   | coding    |
| 0.999992   | coding    |
| 0.999991   | coding    |
| 1          | coding    |
| 0.210029   | noncoding |
| 0.0421299  | noncoding |
| 1          | coding    |
| 1          | coding    |
| 0.999973   | coding    |
| 0.99737    | coding    |

|            |           |
|------------|-----------|
| 0.999976   | coding    |
| 0.991319   | coding    |
| 0.981632   | coding    |
| 0.999997   | coding    |
| 0.999992   | coding    |
| 0.999913   | coding    |
| 1          | coding    |
| 0.0380901  | noncoding |
| 0.395439   | noncoding |
| 0.499838   | noncoding |
| 1          | coding    |
| 0.0184186  | noncoding |
| 0.0425591  | noncoding |
| 0.99998    | coding    |
| 0.101463   | noncoding |
| 0.236103   | noncoding |
| 0.1373     | noncoding |
| 1          | coding    |
| 1          | coding    |
| 0.142657   | noncoding |
| 0.0107085  | noncoding |
| 0.529374   | coding    |
| 0.591847   | coding    |
| 0.0980986  | noncoding |
| 0.114631   | noncoding |
| 0.179986   | noncoding |
| 0.367204   | noncoding |
| 0.270284   | noncoding |
| 0.338219   | noncoding |
| 0.0593395  | noncoding |
| 0.341114   | noncoding |
| 0.0143807  | noncoding |
| 0.999905   | coding    |
| 0.0464172  | noncoding |
| 0.00750236 | noncoding |
| 0.0454317  | noncoding |
| 1          | coding    |
| 1          | coding    |
| 0.999998   | coding    |
| 0.158884   | noncoding |
| 0.0131614  | noncoding |
| 0.999955   | coding    |
| 0.999999   | coding    |
| 0.966046   | coding    |
| 0.996298   | coding    |
| 0.0991233  | noncoding |
| 0.112076   | noncoding |
| 0.138437   | noncoding |
| 1          | coding    |

|           |           |
|-----------|-----------|
| 1         | coding    |
| 1         | coding    |
| 0.0933011 | noncoding |
| 0.0610467 | noncoding |
| 0.332171  | noncoding |
| 0.734863  | coding    |
| 0.444172  | noncoding |
| 0.485947  | noncoding |
| 0.049763  | noncoding |
| 0.078241  | noncoding |
| 0.369488  | noncoding |
| 0.269893  | noncoding |
| 0.034662  | noncoding |
| 0.040106  | noncoding |
| 0.0634792 | noncoding |
| 0.997897  | coding    |
| 0.0270214 | noncoding |
| 0.0106217 | noncoding |
| 1         | coding    |
| 1         | coding    |
| 0.999931  | coding    |
| 0.0193967 | noncoding |
| 0.0226947 | noncoding |
| 1         | coding    |
| 0.997543  | coding    |
| 0.488726  | noncoding |
| 0.161184  | noncoding |
| 0.100119  | noncoding |
| 0.0530504 | noncoding |
| 0.623722  | coding    |
| 1         | coding    |
| 1         | coding    |
| 1         | coding    |
| 0.0856275 | noncoding |
| 0.278628  | noncoding |
| 0.931996  | coding    |
| 0.248364  | noncoding |
| 0.146498  | noncoding |
| 0.862056  | coding    |
| 0.104548  | noncoding |
| 0.864271  | coding    |
| 0.189985  | noncoding |
| 0.79683   | coding    |
| 0.79683   | coding    |
| 0.301371  | noncoding |
| 0.467715  | noncoding |
| 0.12054   | noncoding |
| 0.12054   | noncoding |
| 0.0891943 | noncoding |
| 0.0234389 | noncoding |
| 0.517393  | coding    |
| 0.81319   | coding    |
| 0.365142  | noncoding |
| 0.0480702 | noncoding |

|            |           |
|------------|-----------|
| 0.150962   | noncoding |
| 0.140107   | noncoding |
| 1          | coding    |
| 1          | coding    |
| 0.387059   | noncoding |
| 1          | coding    |
| 0.32396    | noncoding |
| 0.0810842  | noncoding |
| 0.738498   | coding    |
| 0.0644487  | noncoding |
| 0.0890434  | noncoding |
| 0.962127   | coding    |
| 0.0655363  | noncoding |
| 0.0717325  | noncoding |
| 1          | coding    |
| 0.0172017  | noncoding |
| 0.995961   | coding    |
| 0.989587   | coding    |
| 1          | coding    |
| 0.620867   | coding    |
| 0.999838   | coding    |
| 0.136223   | noncoding |
| 0.304118   | noncoding |
| 0.0226414  | noncoding |
| 1          | coding    |
| 1          | coding    |
| 1          | coding    |
| 0.999996   | coding    |
| 0.575318   | coding    |
| 0.146907   | noncoding |
| 0.0860006  | noncoding |
| 0.279249   | noncoding |
| 0.0329702  | noncoding |
| 0.899883   | coding    |
| 1          | coding    |
| 0.286328   | noncoding |
| 0.00733171 | noncoding |
| 0.206655   | noncoding |
| 0.0539722  | noncoding |
| 0.0730244  | noncoding |
| 0.0822488  | noncoding |
| 0.937095   | coding    |
| 0.331391   | noncoding |
| 1          | coding    |
| 1          | coding    |
| 0.986926   | coding    |
| 0.974653   | coding    |
| 0.973689   | coding    |
| 1          | coding    |
| 1          | coding    |
| 1          | coding    |



|           |           |
|-----------|-----------|
| 1         | coding    |
| 0.92249   | coding    |
| 1         | coding    |
| 1         | coding    |
| 1         | coding    |
| 0.95352   | coding    |
| 0.999987  | coding    |
| 1         | coding    |
| 0.921488  | coding    |
| 1         | coding    |
| 0.999996  | coding    |
| 0.998476  | coding    |
| 1         | coding    |
| 1         | coding    |
| 0.986628  | coding    |
| 0.976289  | coding    |
| 0.0375883 | noncoding |
| 0.01745   | noncoding |
| 0.0174093 | noncoding |
| 0.210324  | noncoding |
| 0.157851  | noncoding |
| 0.206773  | noncoding |
| 0.0406726 | noncoding |
| 0.491169  | noncoding |
| 0.891229  | coding    |
| 0.97494   | coding    |
| 0.980839  | coding    |
| 0.0105159 | noncoding |
| 1         | coding    |
| 1         | coding    |
| 0.876458  | coding    |
| 0.830526  | coding    |
| 0.830526  | coding    |
| 0.999847  | coding    |
| 1         | coding    |
| 0.999964  | coding    |
| 1         | coding    |
| 0.809725  | coding    |
| 1         | coding    |
| 0.72578   | coding    |
| 0.0563732 | noncoding |
| 0.418887  | noncoding |
| 0.677073  | coding    |
| 1         | coding    |
| 0.999594  | coding    |
| 0.400567  | noncoding |
| 1         | coding    |
| 0.819025  | coding    |
| 0.0520977 | noncoding |
| 0.0488333 | noncoding |
| 0.0431647 | noncoding |
| 0.0906884 | noncoding |
| 0.0423038 | noncoding |
| 0.999868  | coding    |

|           |           |
|-----------|-----------|
| 0.0485251 | noncoding |
| 1         | coding    |
| 0.0607353 | noncoding |
| 0.999999  | coding    |
| 1         | coding    |
| 1         | coding    |
| 1         | coding    |
| 0.122296  | noncoding |
| 0.999897  | coding    |
| 1         | coding    |
| 0.999955  | coding    |
| 0.341751  | noncoding |
| 1         | coding    |
| 0.0291891 | noncoding |
| 1         | coding    |
| 0.999941  | coding    |
| 0.999922  | coding    |
| 0.988053  | coding    |
| 0.937842  | coding    |
| 1         | coding    |
| 1         | coding    |
| 1         | coding    |
| 0.122128  | noncoding |
| 0.158272  | noncoding |
| 1         | coding    |
| 1         | coding    |
| 1         | coding    |
| 0.0371862 | noncoding |
| 0.0247965 | noncoding |
| 1         | coding    |
| 0.102706  | noncoding |
| 1         | coding    |
| 1         | coding    |
| 0.291299  | noncoding |
| 0.999971  | coding    |
| 1         | coding    |
| 1         | coding    |
| 0.989307  | coding    |
| 0.351519  | noncoding |
| 0.915613  | coding    |
| 0.278665  | noncoding |
| 0.33458   | noncoding |
| 0.0233591 | noncoding |
| 0.45554   | noncoding |
| 0.252803  | noncoding |
| 0.373416  | noncoding |
| 0.0330896 | noncoding |
| 0.0334373 | noncoding |
| 0.0347864 | noncoding |
| 0.0330896 | noncoding |
| 0.0328642 | noncoding |
| 0.0322491 | noncoding |
| 0.0319924 | noncoding |
| 0.115541  | noncoding |

|           |           |
|-----------|-----------|
| 0.0330896 | noncoding |
| 0.0110805 | noncoding |
| 0.0110805 | noncoding |
| 0.0314755 | noncoding |
| 0.0328248 | noncoding |
| 0.0328642 | noncoding |
| 0.0322491 | noncoding |
| 0.266649  | noncoding |
| 0.115162  | noncoding |
| 0.0547381 | noncoding |
| 0.262461  | noncoding |
| 0.999987  | coding    |
| 1         | coding    |
| 0.999987  | coding    |
| 0.99998   | coding    |
| 1         | coding    |
| 1         | coding    |
| 0.10971   | noncoding |
| 0.99994   | coding    |
| 0.422582  | noncoding |
| 0.996812  | coding    |
| 0.999729  | coding    |
| 0.656715  | coding    |
| 0.351287  | noncoding |
| 0.0271952 | noncoding |
| 1         | coding    |
| 1         | coding    |
| 1         | coding    |
| 0.330717  | noncoding |
| 1         | coding    |
| 0.999997  | coding    |
| 1         | coding    |
| 0.0836132 | noncoding |
| 0.13542   | noncoding |
| 0.0858713 | noncoding |
| 0.832615  | coding    |
| 1         | coding    |
| 0.996361  | coding    |
| 0.515614  | coding    |
| 0.822458  | coding    |
| 1         | coding    |
| 0.999799  | coding    |
| 0.524965  | coding    |
| 0.0974038 | noncoding |
| 1         | coding    |
| 1         | coding    |
| 1         | coding    |
| 0.493847  | noncoding |
| 1         | coding    |
| 0.99991   | coding    |
| 0.0794988 | noncoding |
| 1         | coding    |
| 1         | coding    |
| 1         | coding    |

|           |           |
|-----------|-----------|
| 0.0641483 | noncoding |
| 1         | coding    |
| 0.993108  | coding    |
| 0.172865  | noncoding |
| 0.228466  | noncoding |
| 0.0256132 | noncoding |
| 1         | coding    |
| 0.116457  | noncoding |
| 0.0757331 | noncoding |
| 0.218707  | noncoding |
| 0.484752  | noncoding |
| 0.246311  | noncoding |
| 0.217216  | noncoding |
| 0.100618  | noncoding |
| 0.992543  | coding    |
| 0.0798465 | noncoding |
| 0.578414  | coding    |
| 0.136018  | noncoding |
| 0.200989  | noncoding |
| 0.32666   | noncoding |
| 0.04627   | noncoding |
| 0.72128   | coding    |
| 1         | coding    |
| 0.118405  | noncoding |
| 0.149384  | noncoding |
| 1         | coding    |
| 0.954708  | coding    |
| 1         | coding    |
| 0.999997  | coding    |
| 0.999996  | coding    |
| 1         | coding    |
| 1         | coding    |
| 1         | coding    |
| 0.226207  | noncoding |
| 0.0550621 | noncoding |
| 0.388547  | noncoding |
| 0.19851   | noncoding |
| 0.0960411 | noncoding |
| 0.537372  | coding    |
| 0.926259  | coding    |
| 0.0264085 | noncoding |
| 0.998919  | coding    |
| 0.403913  | noncoding |
| 1         | coding    |
| 1         | coding    |
| 0.0817216 | noncoding |
| 0.0314774 | noncoding |
| 0.0163248 | noncoding |

|           |           |
|-----------|-----------|
| 0.0294045 | noncoding |
| 0.371211  | noncoding |
| 0.0101096 | noncoding |
| 1         | coding    |
| 0.995136  | coding    |
| 0.995136  | coding    |
| 0.994195  | coding    |
| 0.996058  | coding    |
| 0.0273624 | noncoding |
| 0.0316025 | noncoding |
| 0.0253182 | noncoding |
| 0.196197  | noncoding |
| 0.984315  | coding    |
| 0.177242  | noncoding |
| 0.0799444 | noncoding |
| 0.0801544 | noncoding |
| 0.999997  | coding    |
| 1         | coding    |
| 0.29793   | noncoding |
| 0.536139  | coding    |
| 0.110207  | noncoding |
| 0.87325   | coding    |
| 0.647582  | coding    |
| 0.426459  | noncoding |
| 0.313981  | noncoding |
| 1         | coding    |
| 0.0850288 | noncoding |
| 0.0229907 | noncoding |
| 0.0621972 | noncoding |
| 0.0541187 | noncoding |
| 0.0622182 | noncoding |
| 1         | coding    |
| 1         | coding    |
| 0.226087  | noncoding |
| 0.0597036 | noncoding |
| 0.999999  | coding    |
| 1         | coding    |
| 0.0872766 | noncoding |
| 1         | coding    |
| 0.621548  | coding    |
| 0.430388  | noncoding |
| 1         | coding    |
| 0.999432  | coding    |
| 0.999359  | coding    |
| 0.999685  | coding    |
| 0.999545  | coding    |
| 1         | coding    |
| 0.998516  | coding    |

|            |           |
|------------|-----------|
| 0.999757   | coding    |
| 1          | coding    |
| 0.0735124  | noncoding |
| 1          | coding    |
| 1          | coding    |
| 1          | coding    |
| 0.0089912  | noncoding |
| 0.550666   | coding    |
| 0.329768   | noncoding |
| 0.00974561 | noncoding |
| 0.740088   | coding    |
| 0.999999   | coding    |
| 1          | coding    |
| 0.158806   | noncoding |
| 0.217812   | noncoding |
| 1          | coding    |
| 1          | coding    |
| 0.283896   | noncoding |
| 1          | coding    |
| 0.0847149  | noncoding |
| 0.0760065  | noncoding |
| 0.371102   | noncoding |
| 0.951625   | coding    |
| 1          | coding    |
| 0.0119122  | noncoding |
| 0.896508   | coding    |
| 0.0169454  | noncoding |
| 0.103269   | noncoding |
| 1          | coding    |
| 1          | coding    |
| 0.445786   | noncoding |
| 0.0233051  | noncoding |
| 1          | coding    |
| 1          | coding    |
| 0.0433115  | noncoding |
| 0.00606901 | noncoding |
| 0.0582963  | noncoding |
| 0.0657444  | noncoding |
| 0.386087   | noncoding |
| 1          | coding    |
| 0.67647    | coding    |
| 1          | coding    |
| 0.999997   | coding    |
| 0.00627477 | noncoding |
| 1          | coding    |
| 0.807385   | coding    |
| 1          | coding    |
| 1          | coding    |
| 0.111804   | noncoding |

|           |           |
|-----------|-----------|
| 0.105471  | noncoding |
| 0.118095  | noncoding |
| 1         | coding    |
| 0.998871  | coding    |
| 0.999606  | coding    |
| 0.999983  | coding    |
| 0.107511  | noncoding |
| 0.999601  | coding    |
| 0.999987  | coding    |
| 0.383853  | noncoding |
| 1         | coding    |
| 1         | coding    |
| 1         | coding    |
| 0.998573  | coding    |
| 0.839936  | coding    |
| 0.999829  | coding    |
| 1         | coding    |
| 1         | coding    |
| 0.223973  | noncoding |
| 0.999997  | coding    |
| 0.998765  | coding    |
| 1         | coding    |
| 0.980354  | coding    |
| 1         | coding    |
| 1         | coding    |
| 0.997257  | coding    |
| 1         | coding    |
| 0.0298744 | noncoding |
| 0.0760185 | noncoding |
| 0.0182952 | noncoding |
| 1         | coding    |
| 1         | coding    |
| 1         | coding    |
| 0.217208  | noncoding |
| 0.999983  | coding    |
| 0.927563  | coding    |
| 0.999404  | coding    |
| 1         | coding    |
| 0.993593  | coding    |
| 0.997689  | coding    |
| 1         | coding    |
| 0.99271   | coding    |
| 1         | coding    |
| 1         | coding    |
| 1         | coding    |
| 0.999995  | coding    |
| 1         | coding    |
| 0.023961  | noncoding |
| 1         | coding    |
| 1         | coding    |
| 0.944166  | coding    |
| 0.952422  | coding    |
| 1         | coding    |
| 1         | coding    |

|           |           |
|-----------|-----------|
| 0.994714  | coding    |
| 0.99574   | coding    |
| 0.999121  | coding    |
| 0.998956  | coding    |
| 1         | coding    |
| 0.99999   | coding    |
| 0.896246  | coding    |
| 0.168953  | noncoding |
| 0.706718  | coding    |
| 0.249118  | noncoding |
| 0.110304  | noncoding |
| 0.999605  | coding    |
| 0.999999  | coding    |
| 0.999999  | coding    |
| 1         | coding    |
| 0.999985  | coding    |
| 0.872764  | coding    |
| 0.974644  | coding    |
| 1         | coding    |
| 0.994999  | coding    |
| 0.0644376 | noncoding |
| 0.999999  | coding    |
| 0.99556   | coding    |
| 0.995819  | coding    |
| 1         | coding    |
| 0.837258  | coding    |
| 0.999995  | coding    |
| 1         | coding    |
| 1         | coding    |
| 0.951624  | coding    |
| 0.110807  | noncoding |
| 0.753494  | coding    |
| 1         | coding    |
| 0.0654533 | noncoding |
| 0.99725   | coding    |
| 0.240511  | noncoding |
| 1         | coding    |
| 0.563425  | coding    |
| 0.414079  | noncoding |



|           |           |
|-----------|-----------|
| 0.420535  | noncoding |
| 0.778724  | coding    |
| 0.744699  | coding    |
| 0.999997  | coding    |
| 0.999993  | coding    |
| 0.885321  | coding    |
| 0.451455  | noncoding |
| 0.0726658 | noncoding |
| 0.993616  | coding    |
| 1         | coding    |
| 1         | coding    |
| 0.999977  | coding    |
| 0.999702  | coding    |
| 0.722554  | coding    |
| 1         | coding    |
| 0.999969  | coding    |
| 0.669101  | coding    |
| 1         | coding    |
| 1         | coding    |
| 0.223732  | noncoding |
| 1         | coding    |
| 0.017572  | noncoding |
| 1         | coding    |
| 0.0446245 | noncoding |
| 0.999561  | coding    |
| 0.496337  | noncoding |
| 0.163813  | noncoding |
| 0.0261313 | noncoding |
| 1         | coding    |
| 0.0950353 | noncoding |
| 1         | coding    |
| 0.977484  | coding    |
| 0.262018  | noncoding |
| 0.173343  | noncoding |
| 0.999941  | coding    |
| 0.996995  | coding    |
| 0.999999  | coding    |
| 0.0238726 | noncoding |
| 0.985835  | coding    |
| 0.517514  | coding    |
| 0.0282137 | noncoding |
| 0.0328057 | noncoding |
| 0.889732  | coding    |
| 0.2462    | noncoding |
| 0.275752  | noncoding |
| 0.141861  | noncoding |

|           |           |
|-----------|-----------|
| 1         | coding    |
| 0.999804  | coding    |
| 0.0336728 | noncoding |
| 0.996045  | coding    |
| 0.16664   | noncoding |
| 0.206104  | noncoding |
| 0.179818  | noncoding |
| 0.206264  | noncoding |
| 0.142803  | noncoding |
| 0.187387  | noncoding |
| 0.193346  | noncoding |
| 0.16664   | noncoding |
| 0.166644  | noncoding |
| 0.171027  | noncoding |
| 0.990722  | coding    |
| 0.0704495 | noncoding |
| 0.0428399 | noncoding |
| 0.166147  | noncoding |
| 0.999604  | coding    |
| 0.0256495 | noncoding |
| 0.282677  | noncoding |
| 0.414492  | noncoding |
| 1         | coding    |
| 0.997929  | coding    |
| 0.162694  | noncoding |
| 0.166334  | noncoding |
| 0.250445  | noncoding |
| 1         | coding    |
| 0.0644158 | noncoding |
| 0.102826  | noncoding |
| 0.102826  | noncoding |
| 0.622139  | coding    |
| 0.945886  | coding    |
| 0.999972  | coding    |
| 0.920828  | coding    |
| 0.565196  | coding    |
| 0.976474  | coding    |
| 0.971514  | coding    |
| 0.209882  | noncoding |
| 1         | coding    |
| 1         | coding    |
| 0.999978  | coding    |
| 1         | coding    |
| 0.0175564 | noncoding |
| 0.160904  | noncoding |
| 0.15448   | noncoding |
| 0.998991  | coding    |
| 0.366844  | noncoding |
| 0.138498  | noncoding |
| 0.0736702 | noncoding |
| 1         | coding    |
| 1         | coding    |
| 0.999999  | coding    |
| 1         | coding    |

[illegible]

|            |           |
|------------|-----------|
| 1          | coding    |
| 0.087382   | noncoding |
| 0.553728   | coding    |
| 1          | coding    |
| 0.999882   | coding    |
| 0.9759     | coding    |
| 0.127185   | noncoding |
| 0.490208   | noncoding |
| 0.879642   | coding    |
| 0.739568   | coding    |
| 0.00361842 | noncoding |
| 0.78607    | coding    |
| 0.0685298  | noncoding |
| 0.0898727  | noncoding |
| 0.0117251  | noncoding |
| 1          | coding    |
| 0.0284936  | noncoding |
| 0.995944   | coding    |
| 0.995838   | coding    |
| 0.99965    | coding    |
| 0.255201   | noncoding |
| 0.705264   | coding    |
| 0.122513   | noncoding |
| 0.0281366  | noncoding |
| 0.297622   | noncoding |
| 0.0351326  | noncoding |
| 0.447818   | noncoding |
| 0.0771331  | noncoding |
| 0.994778   | coding    |
| 0.985379   | coding    |
| 0.657754   | coding    |
| 0.266005   | noncoding |
| 0.112901   | noncoding |
| 0.99856    | coding    |
| 0.999949   | coding    |
| 0.999999   | coding    |
| 0.999999   | coding    |
| 1          | coding    |
| 0.999976   | coding    |
| 0.999866   | coding    |
| 0.388949   | noncoding |
| 0.252216   | noncoding |
| 0.0207358  | noncoding |
| 0.0497868  | noncoding |
| 0.832674   | coding    |
| 0.0769398  | noncoding |
| 1          | coding    |
| 0.016994   | noncoding |
| 0.0428645  | noncoding |
| 0.128917   | noncoding |

|            |           |
|------------|-----------|
| 0.153283   | noncoding |
| 0.394081   | noncoding |
| 0.434628   | noncoding |
| 1          | coding    |
| 0.10074    | noncoding |
| 1          | coding    |
| 1          | coding    |
| 0.147405   | noncoding |
| 0.999818   | coding    |
| 0.0171137  | noncoding |
| 0.386823   | noncoding |
| 0.0510344  | noncoding |
| 0.132773   | noncoding |
| 1          | coding    |
| 0.0325257  | noncoding |
| 0.153516   | noncoding |
| 0.153516   | noncoding |
| 0.262059   | noncoding |
| 0.160036   | noncoding |
| 0.870788   | coding    |
| 0.495189   | noncoding |
| 0.257853   | noncoding |
| 0.257853   | noncoding |
| 0.257853   | noncoding |
| 0.337256   | noncoding |
| 0.0777194  | noncoding |
| 0.0395955  | noncoding |
| 0.692346   | coding    |
| 0.703204   | coding    |
| 0.141433   | noncoding |
| 0.999922   | coding    |
| 0.999934   | coding    |
| 1          | coding    |
| 0.00520767 | noncoding |
| 0.134069   | noncoding |
| 0.247146   | noncoding |
| 0.758247   | coding    |
| 0.999322   | coding    |

|            |           |
|------------|-----------|
| 0.996723   | coding    |
| 0.999847   | coding    |
| 0.999988   | coding    |
| 0.999967   | coding    |
| 1          | coding    |
| 0.999998   | coding    |
| 0.0435138  | noncoding |
| 0.0190587  | noncoding |
| 1          | coding    |
| 0.0998757  | noncoding |
| 0.661269   | coding    |
| 0.0379516  | noncoding |
| 0.661269   | coding    |
| 1          | coding    |
| 1          | coding    |
| 0.00762953 | noncoding |
| 0.0299247  | noncoding |
| 0.138235   | noncoding |
| 0.999993   | coding    |
| 1          | coding    |
| 0.999604   | coding    |
| 1          | coding    |
| 1          | coding    |
| 0.0365233  | noncoding |
| 0.999872   | coding    |
| 0.790539   | coding    |
| 0.99744    | coding    |
| 0.776941   | coding    |
| 0.71629    | coding    |
| 0.712445   | coding    |
| 1          | coding    |
| 1          | coding    |
| 0.0277413  | noncoding |
| 0.124392   | noncoding |
| 0.58153    | coding    |
| 0.64734    | coding    |
| 0.0512492  | noncoding |
| 1          | coding    |
| 0.0396567  | noncoding |
| 0.0114857  | noncoding |
| 0.0199353  | noncoding |
| 0.0290777  | noncoding |
| 0.0976885  | noncoding |
| 1          | coding    |
| 0.0479165  | noncoding |
| 0.94634    | coding    |
| 0.011821   | noncoding |
| 0.238996   | noncoding |
| 0.857082   | coding    |
| 0.620081   | coding    |
| 0.99933    | coding    |

|            |           |
|------------|-----------|
| 0.996134   | coding    |
| 0.69265    | coding    |
| 0.715042   | coding    |
| 0.0737691  | noncoding |
| 0.0449584  | noncoding |
| 0.797269   | coding    |
| 0.99917    | coding    |
| 0.822149   | coding    |
| 0.999899   | coding    |
| 0.999999   | coding    |
| 0.0708742  | noncoding |
| 0.99989    | coding    |
| 0.976241   | coding    |
| 0.0299697  | noncoding |
| 0.306996   | noncoding |
| 1          | coding    |
| 1          | coding    |
| 0.0696164  | noncoding |
| 0.635246   | coding    |
| 0.945385   | coding    |
| 0.132998   | noncoding |
| 1          | coding    |
| 0.627362   | coding    |
| 0.128047   | noncoding |
| 0.0252904  | noncoding |
| 0.132905   | noncoding |
| 0.421653   | noncoding |
| 1          | coding    |
| 0.10573    | noncoding |
| 0.145757   | noncoding |
| 0.151883   | noncoding |
| 0.432772   | noncoding |
| 0.71728    | coding    |
| 0.0449551  | noncoding |
| 0.0481057  | noncoding |
| 0.0116242  | noncoding |
| 0.526517   | coding    |
| 0.0358981  | noncoding |
| 0.366136   | noncoding |
| 0.225347   | noncoding |
| 0.0221462  | noncoding |
| 0.836227   | coding    |
| 0.832794   | coding    |
| 0.123827   | noncoding |
| 0.203623   | noncoding |
| 0.568588   | coding    |
| 0.0566739  | noncoding |
| 0.0392206  | noncoding |
| 0.225614   | noncoding |
| 0.00373961 | noncoding |
| 1          | coding    |

|            |           |
|------------|-----------|
| 0.179538   | noncoding |
| 0.0312585  | noncoding |
| 0.483804   | noncoding |
| 0.110139   | noncoding |
| 0.103388   | noncoding |
| 0.996685   | coding    |
| 0.721267   | coding    |
| 0.916502   | coding    |
| 0.873077   | coding    |
| 0.0280517  | noncoding |
| 0.999217   | coding    |
| 1          | coding    |
| 0.0843872  | noncoding |
| 0.0479733  | noncoding |
| 0.171181   | noncoding |
| 1          | coding    |
| 0.0416806  | noncoding |
| 0.770026   | coding    |
| 0.056642   | noncoding |
| 0.175863   | noncoding |
| 0.149371   | noncoding |
| 0.999634   | coding    |
| 0.97677    | coding    |
| 0.99862    | coding    |
| 0.00741114 | noncoding |
| 0.0282087  | noncoding |
| 0.012187   | noncoding |
| 1          | coding    |
| 0.0452795  | noncoding |
| 0.0425846  | noncoding |
| 0.194955   | noncoding |
| 0.0241929  | noncoding |
| 0.999999   | coding    |
| 1          | coding    |
| 1          | coding    |
| 0.999999   | coding    |
| 1          | coding    |
| 0.0298142  | noncoding |



|           |           |
|-----------|-----------|
| 1         | coding    |
| 1         | coding    |
| 0.161323  | noncoding |
| 1         | coding    |
| 0.0244774 | noncoding |
| 0.0830042 | noncoding |
| 0.0123387 | noncoding |
| 0.0851642 | noncoding |
| 0.030519  | noncoding |
| 0.0253239 | noncoding |
| 1         | coding    |
| 0.182037  | noncoding |
| 0.999885  | coding    |
| 1         | coding    |
| 0.0918715 | noncoding |
| 0.438567  | noncoding |
| 0.262144  | noncoding |
| 1         | coding    |
| 0.950311  | coding    |
| 0.99987   | coding    |
| 0.45116   | noncoding |
| 0.29117   | noncoding |
| 0.054208  | noncoding |
| 0.495128  | noncoding |
| 1         | coding    |
| 0.969503  | coding    |
| 0.0527953 | noncoding |
| 0.172227  | noncoding |
| 1         | coding    |
| 0.663633  | coding    |
| 0.308508  | noncoding |
| 0.469791  | noncoding |
| 1         | coding    |
| 1         | coding    |
| 1         | coding    |
| 0.0546473 | noncoding |
| 0.0202543 | noncoding |
| 0.0450876 | noncoding |
| 0.936579  | coding    |
| 0.999863  | coding    |
| 1         | coding    |
| 0.0444663 | noncoding |
| 1         | coding    |

|            |           |
|------------|-----------|
| 1          | coding    |
| 1          | coding    |
| 0.0427371  | noncoding |
| 0.0406825  | noncoding |
| 0.00847724 | noncoding |
| 0.0500781  | noncoding |
| 0.0226365  | noncoding |
| 0.0141292  | noncoding |
| 0.113014   | noncoding |
| 0.0471202  | noncoding |
| 0.988036   | coding    |
| 0.250854   | noncoding |
| 0.995454   | coding    |
| 1          | coding    |
| 0.037219   | noncoding |
| 1          | coding    |
| 1          | coding    |
| 0.99998    | coding    |
| 0.0643259  | noncoding |
| 0.733696   | coding    |
| 0.00934464 | noncoding |
| 0.998505   | coding    |
| 0.999503   | coding    |
| 0.983425   | coding    |
| 0.867438   | coding    |
| 0.999685   | coding    |
| 0.992084   | coding    |
| 0.995886   | coding    |
| 0.101689   | noncoding |
| 1          | coding    |
| 0.257621   | noncoding |
| 0.137552   | noncoding |
| 0.0843382  | noncoding |
| 0.161951   | noncoding |
| 1          | coding    |
| 0.140011   | noncoding |
| 0.0149734  | noncoding |
| 0.960814   | coding    |
| 0.0538031  | noncoding |
| 0.0258891  | noncoding |
| 1          | coding    |
| 1          | coding    |
| 1          | coding    |
| 0.343001   | noncoding |
| 0.998965   | coding    |
| 1          | coding    |
| 0.0320151  | noncoding |

|            |           |
|------------|-----------|
| 1          | coding    |
| 0.99974    | coding    |
| 0.99999    | coding    |
| 1          | coding    |
| 1          | coding    |
| 0.999999   | coding    |
| 1          | coding    |
| 0.0392836  | noncoding |
| 1          | coding    |
| 1          | coding    |
| 1          | coding    |
| 0.986803   | coding    |
| 1          | coding    |
| 0.998628   | coding    |
| 1          | coding    |
| 0.999994   | coding    |
| 1          | coding    |
| 0.072896   | noncoding |
| 0.0863952  | noncoding |
| 0.00725052 | noncoding |
| 0.152863   | noncoding |
| 0.154332   | noncoding |
| 0.134588   | noncoding |
| 1          | coding    |
| 1          | coding    |
| 1          | coding    |
| 0.0107825  | noncoding |
| 1          | coding    |
| 1          | coding    |
| 1          | coding    |
| 0.0846346  | noncoding |
| 0.0414442  | noncoding |
| 0.0110929  | noncoding |
| 0.239531   | noncoding |
| 0.098525   | noncoding |
| 1          | coding    |
| 0.962502   | coding    |
| 1          | coding    |
| 0.0363638  | noncoding |
| 0.125175   | noncoding |

|            |           |
|------------|-----------|
| 0.096816   | noncoding |
| 0.124766   | noncoding |
| 0.0400777  | noncoding |
| 1          | coding    |
| 1          | coding    |
| 0.503613   | coding    |
| 0.922383   | coding    |
| 0.894898   | coding    |
| 0.999978   | coding    |
| 0.416437   | noncoding |
| 1          | coding    |
| 0.168077   | noncoding |
| 0.176155   | noncoding |
| 0.99971    | coding    |
| 0.911354   | coding    |
| 1          | coding    |
| 0.149178   | noncoding |
| 0.0643903  | noncoding |
| 0.0739116  | noncoding |
| 0.0815443  | noncoding |
| 1          | coding    |
| 0.996921   | coding    |
| 1          | coding    |
| 1          | coding    |
| 0.0948602  | noncoding |
| 0.999602   | coding    |
| 1          | coding    |
| 0.999999   | coding    |
| 1          | coding    |
| 1          | coding    |
| 0.999966   | coding    |
| 0.999962   | coding    |
| 0.999991   | coding    |
| 0.403502   | noncoding |
| 0.0482362  | noncoding |
| 0.828726   | coding    |
| 0.981391   | coding    |
| 0.999937   | coding    |
| 0.99999    | coding    |
| 1          | coding    |
| 0.00666215 | noncoding |
| 0.999888   | coding    |

[illegible]

|            |           |
|------------|-----------|
| 0.945154   | coding    |
| 0.999398   | coding    |
| 0.970233   | coding    |
| 0.0452755  | noncoding |
| 1          | coding    |
| 0.212879   | noncoding |
| 0.228162   | noncoding |
| 0.036735   | noncoding |
| 1          | coding    |
| 0.0260521  | noncoding |
| 0.106548   | noncoding |
| 0.00393247 | noncoding |
| 0.076388   | noncoding |
| 0.19285    | noncoding |
| 0.0537519  | noncoding |
| 0.844047   | coding    |
| 0.0814075  | noncoding |
| 1          | coding    |
| 1          | coding    |
| 1          | coding    |
| 0.0299021  | noncoding |
| 0.068183   | noncoding |
| 1          | coding    |
| 0.999887   | coding    |
| 1          | coding    |
| 1          | coding    |
| 0.265425   | noncoding |
| 0.0573645  | noncoding |
| 0.0171939  | noncoding |
| 0.178901   | noncoding |
| 0.022358   | noncoding |
| 1          | coding    |
| 0.0145401  | noncoding |
| 1          | coding    |
| 1          | coding    |
| 0.862602   | coding    |
| 1          | coding    |
| 0.987308   | coding    |
| 0.0957172  | noncoding |
| 0.0747358  | noncoding |
| 0.0754482  | noncoding |
| 0.14234    | noncoding |
| 0.0671138  | noncoding |
| 0.131271   | noncoding |
| 0.981056   | coding    |
| 0.820415   | coding    |
| 0.0602246  | noncoding |
| 0.216594   | noncoding |

|           |           |
|-----------|-----------|
| 1         | coding    |
| 0.250674  | noncoding |
| 0.999997  | coding    |
| 0.997471  | coding    |
| 0.960581  | coding    |
| 0.998428  | coding    |
| 0.0693734 | noncoding |
| 1         | coding    |
| 0.0683875 | noncoding |
| 0.10667   | noncoding |
| 0.0270398 | noncoding |
| 0.0998949 | noncoding |
| 0.999919  | coding    |
| 1         | coding    |
| 0.0674913 | noncoding |
| 0.113035  | noncoding |
| 0.109806  | noncoding |
| 0.0786768 | noncoding |
| 1         | coding    |
| 0.0642253 | noncoding |
| 0.0817499 | noncoding |
| 1         | coding    |
| 0.999092  | coding    |
| 0.232415  | noncoding |
| 0.999864  | coding    |
| 1         | coding    |
| 0.999995  | coding    |
| 1         | coding    |
| 0.640908  | coding    |
| 1         | coding    |
| 1         | coding    |
| 1         | coding    |
| 0.0537589 | noncoding |
| 1         | coding    |
| 1         | coding    |
| 0.601733  | coding    |
| 0.0629179 | noncoding |
| 1         | coding    |
| 0.99992   | coding    |
| 0.018428  | noncoding |

|           |           |
|-----------|-----------|
| 0.998306  | coding    |
| 0.867802  | coding    |
| 0.404808  | noncoding |
| 0.463619  | noncoding |
| 0.914071  | coding    |
| 0.914071  | coding    |
| 0.914071  | coding    |
| 0.875639  | coding    |
| 0.887347  | coding    |
| 0.875639  | coding    |
| 0.914071  | coding    |
| 0.903391  | coding    |
| 0.05207   | noncoding |
| 0.0896583 | noncoding |
| 0.100541  | noncoding |
| 0.422484  | noncoding |
| 0.403188  | noncoding |
| 1         | coding    |
| 1         | coding    |
| 0.999991  | coding    |
| 1         | coding    |
| 1         | coding    |
| 0.716361  | coding    |
| 0.851835  | coding    |
| 1         | coding    |
| 0.999987  | coding    |
| 0.787831  | coding    |
| 0.0160885 | noncoding |
| 1         | coding    |
| 1         | coding    |
| 0.999999  | coding    |
| 1         | coding    |
| 0.976233  | coding    |
| 0.0313427 | noncoding |
| 1         | coding    |
| 1         | coding    |
| 0.10083   | noncoding |
| 0.0522837 | noncoding |
| 0.994365  | coding    |
| 0.323269  | noncoding |
| 0.0703317 | noncoding |
| 1         | coding    |
| 0.999981  | coding    |
| 0.998914  | coding    |
| 1         | coding    |
| 0.999624  | coding    |
| 0.999865  | coding    |
| 1         | coding    |
| 0.995312  | coding    |
| 0.997628  | coding    |
| 0.894774  | coding    |



|            |           |
|------------|-----------|
| 0.833237   | coding    |
| 0.88322    | coding    |
| 0.181748   | noncoding |
| 0.242991   | noncoding |
| 0.942587   | coding    |
| 0.874094   | coding    |
| 0.0567368  | noncoding |
| 1          | coding    |
| 1          | coding    |
| 0.262674   | noncoding |
| 0.1071     | noncoding |
| 0.97422    | coding    |
| 0.303876   | noncoding |
| 0.00358074 | noncoding |
| 1          | coding    |
| 0.176128   | noncoding |
| 0.999985   | coding    |
| 0.991967   | coding    |
| 0.999357   | coding    |
| 0.995988   | coding    |
| 0.999999   | coding    |
| 0.983556   | coding    |
| 1          | coding    |
| 0.0197236  | noncoding |
| 0.998957   | coding    |
| 0.998904   | coding    |
| 0.999971   | coding    |
| 1          | coding    |
| 0.999941   | coding    |
| 0.999972   | coding    |
| 0.999946   | coding    |
| 1          | coding    |
| 0.266991   | noncoding |
| 0.0184995  | noncoding |
| 0.791219   | coding    |
| 0.78062    | coding    |
| 0.902014   | coding    |
| 0.329196   | noncoding |
| 0.114895   | noncoding |
| 0.929976   | coding    |
| 1          | coding    |
| 0.0871116  | noncoding |
| 1          | coding    |
| 0.865859   | coding    |
| 0.181321   | noncoding |
| 0.852989   | coding    |
| 0.98857    | coding    |
| 0.443377   | noncoding |
| 0.828198   | coding    |
| 0.901414   | coding    |

|           |           |
|-----------|-----------|
| 0.0251204 | noncoding |
| 1         | coding    |
| 1         | coding    |
| 0.999984  | coding    |
| 0.999984  | coding    |
| 0.998762  | coding    |
| 0.998362  | coding    |
| 1         | coding    |
| 1         | coding    |
| 1         | coding    |
| 0.30908   | noncoding |
| 1         | coding    |
| 0.999993  | coding    |
| 1         | coding    |
| 0.0105524 | noncoding |
| 0.0141207 | noncoding |
| 0.999998  | coding    |
| 0.280136  | noncoding |
| 0.774047  | coding    |
| 0.978366  | coding    |
| 0.979657  | coding    |
| 0.166526  | noncoding |
| 1         | coding    |
| 1         | coding    |
| 0.880937  | coding    |
| 0.043182  | noncoding |
| 1         | coding    |
| 0.999995  | coding    |
| 1         | coding    |
| 0.699232  | coding    |
| 0.711323  | coding    |
| 1         | coding    |

[illegible]

|           |           |
|-----------|-----------|
| 1         | coding    |
| 0.0401596 | noncoding |
| 0.668166  | coding    |
| 0.999999  | coding    |
| 1         | coding    |
| 1         | coding    |
| 1         | coding    |
| 0.999582  | coding    |
| 1         | coding    |
| 1         | coding    |
| 0.281572  | noncoding |
| 0.472984  | noncoding |
| 0.0508799 | noncoding |
| 0.992628  | coding    |
| 0.0897751 | noncoding |
| 0.999982  | coding    |
| 0.987314  | coding    |
| 0.993348  | coding    |
| 0.994136  | coding    |
| 0.999395  | coding    |
| 1         | coding    |
| 1         | coding    |
| 1         | coding    |
| 0.999919  | coding    |
| 1         | coding    |
| 0.99997   | coding    |
| 0.999637  | coding    |
| 0.802622  | coding    |
| 0.999591  | coding    |
| 0.437874  | noncoding |
| 1         | coding    |
| 0.0257349 | noncoding |
| 0.545303  | coding    |
| 1         | coding    |
| 0.999998  | coding    |
| 1         | coding    |
| 0.999993  | coding    |
| 1         | coding    |
| 0.57708   | coding    |
| 0.923981  | coding    |
| 0.999999  | coding    |
| 1         | coding    |
| 0.999979  | coding    |

|            |           |
|------------|-----------|
| 1          | coding    |
| 1          | coding    |
| 1          | coding    |
| 0.999979   | coding    |
| 0.999977   | coding    |
| 0.861681   | coding    |
| 0.167374   | noncoding |
| 0.0177238  | noncoding |
| 0.99983    | coding    |
| 1          | coding    |
| 0.999999   | coding    |
| 0.999998   | coding    |
| 0.12923    | noncoding |
| 0.0207731  | noncoding |
| 0.00524921 | noncoding |
| 0.0771156  | noncoding |
| 0.0178163  | noncoding |
| 1          | coding    |
| 0.856076   | coding    |
| 0.449473   | noncoding |
| 1          | coding    |
| 0.00795724 | noncoding |
| 0.863764   | coding    |
| 0.470353   | noncoding |
| 0.0605831  | noncoding |
| 0.0514942  | noncoding |
| 0.04931    | noncoding |
| 0.0447111  | noncoding |
| 0.0556004  | noncoding |
| 1          | coding    |
| 0.0236792  | noncoding |
| 0.129211   | noncoding |
| 0.169506   | noncoding |
| 0.202995   | noncoding |

|           |           |
|-----------|-----------|
| 0.254026  | noncoding |
| 1         | coding    |
| 0.999993  | coding    |
| 0.9997    | coding    |
| 1         | coding    |
| 0.292205  | noncoding |
| 1         | coding    |
| 0.219847  | noncoding |
| 0.999615  | coding    |
| 1         | coding    |
| 0.036339  | noncoding |
| 0.999998  | coding    |
| 1         | coding    |
| 0.969294  | coding    |
| 0.999946  | coding    |
| 0.999779  | coding    |
| 0.605472  | coding    |
| 0.997196  | coding    |
| 0.999652  | coding    |
| 0.999902  | coding    |
| 0.999955  | coding    |
| 1         | coding    |
| 0.997087  | coding    |
| 1         | coding    |
| 0.0665834 | noncoding |
| 0.0605648 | noncoding |
| 1         | coding    |

|           |           |
|-----------|-----------|
| 0.885827  | coding    |
| 0.0267299 | noncoding |
| 1         | coding    |
| 0.11481   | noncoding |
| 1         | coding    |
| 0.0466317 | noncoding |
| 1         | coding    |
| 0.113968  | noncoding |
| 0.0645958 | noncoding |
| 0.852551  | coding    |
| 1         | coding    |
| 0.0788726 | noncoding |
| 0.011327  | noncoding |
| 0.0898002 | noncoding |
| 1         | coding    |
| 0.49455   | noncoding |
| 0.0205985 | noncoding |
| 0.0452776 | noncoding |
| 0.154272  | noncoding |
| 0.0410714 | noncoding |
| 1         | coding    |
| 1         | coding    |
| 1         | coding    |
| 0.951256  | coding    |
| 1         | coding    |
| 0.999726  | coding    |
| 0.999842  | coding    |
| 1         | coding    |
| 0.0653156 | noncoding |
| 0.555725  | coding    |
| 0.0677036 | noncoding |
| 0.925169  | coding    |
| 0.132737  | noncoding |
| 1         | coding    |
| 1         | coding    |
| 0.0851575 | noncoding |
| 0.999997  | coding    |
| 1         | coding    |
| 0.999546  | coding    |
| 1         | coding    |
| 0.671326  | coding    |
| 1         | coding    |
| 1         | coding    |
| 1         | coding    |

|           |           |
|-----------|-----------|
| 1         | coding    |
| 0.490005  | noncoding |
| 0.136919  | noncoding |
| 0.222701  | noncoding |
| 0.0942679 | noncoding |
| 0.479174  | noncoding |
| 0.0896701 | noncoding |
| 0.462967  | noncoding |
| 0.202094  | noncoding |
| 0.434311  | noncoding |
| 0.0550053 | noncoding |
| 0.999924  | coding    |
| 1         | coding    |
| 0.333641  | noncoding |
| 1         | coding    |
| 0.999996  | coding    |
| 0.987639  | coding    |
| 0.999998  | coding    |
| 1         | coding    |
| 0.0378602 | noncoding |
| 0.084917  | noncoding |
| 0.99435   | coding    |
| 0.0167024 | noncoding |
| 0.0326352 | noncoding |
| 0.921186  | coding    |
| 0.953081  | coding    |
| 0.110409  | noncoding |
| 0.0474199 | noncoding |
| 0.0853727 | noncoding |
| 1         | coding    |
| 1         | coding    |
| 0.971078  | coding    |
| 0.999949  | coding    |
| 0.999997  | coding    |
| 0.317927  | noncoding |
| 1         | coding    |
| 1         | coding    |
| 1         | coding    |
| 0.160217  | noncoding |
| 0.209368  | noncoding |
| 0.712154  | coding    |
| 0.712154  | coding    |
| 1         | coding    |
| 1         | coding    |
| 1         | coding    |



|           |           |
|-----------|-----------|
| 1         | coding    |
| 0.996717  | coding    |
| 0.0290396 | noncoding |
| 0.999998  | coding    |
| 1         | coding    |
| 1         | coding    |
| 0.257553  | noncoding |
| 0.999997  | coding    |
| 0.0092236 | noncoding |
| 1         | coding    |
| 0.999999  | coding    |
| 0.999999  | coding    |
| 0.0458598 | noncoding |
| 0.0441345 | noncoding |
| 0.0441345 | noncoding |
| 0.0580481 | noncoding |
| 1         | coding    |
| 1         | coding    |
| 0.847189  | coding    |
| 0.261257  | noncoding |
| 0.0891987 | noncoding |
| 0.972945  | coding    |
| 0.150857  | noncoding |
| 1         | coding    |
| 0.989775  | coding    |
| 0.022129  | noncoding |
| 0.988223  | coding    |
| 0.989913  | coding    |
| 1         | coding    |
| 1         | coding    |
| 0.999997  | coding    |
| 0.0750484 | noncoding |
| 0.998858  | coding    |
| 1         | coding    |
| 1         | coding    |
| 0.0612602 | noncoding |
| 0.999123  | coding    |
| 0.220453  | noncoding |
| 0.0285236 | noncoding |
| 1         | coding    |
| 0.999999  | coding    |
| 0.980215  | coding    |
| 1         | coding    |
| 0.928729  | coding    |
| 0.999989  | coding    |
| 1         | coding    |
| 1         | coding    |
| 1         | coding    |

|            |           |
|------------|-----------|
| 0.0553841  | noncoding |
| 0.0151077  | noncoding |
| 0.599567   | coding    |
| 0.00953705 | noncoding |
| 0.800513   | coding    |
| 1          | coding    |
| 0.0235096  | noncoding |
| 0.327876   | noncoding |
| 0.136039   | noncoding |
| 0.999999   | coding    |
| 0.999999   | coding    |
| 0.183761   | noncoding |
| 1          | coding    |
| 0.238927   | noncoding |
| 0.0912876  | noncoding |
| 0.0162255  | noncoding |
| 0.0211142  | noncoding |
| 0.422418   | noncoding |
| 0.0858385  | noncoding |
| 0.703696   | coding    |
| 0.740419   | coding    |
| 0.0176998  | noncoding |
| 0.0609978  | noncoding |
| 0.136918   | noncoding |
| 0.0167602  | noncoding |
| 0.11078    | noncoding |
| 0.112488   | noncoding |
| 0.0733426  | noncoding |
| 0.30057    | noncoding |
| 0.0186682  | noncoding |
| 0.0437508  | noncoding |
| 1          | coding    |
| 1          | coding    |
| 1          | coding    |
| 0.51407    | coding    |
| 0.999994   | coding    |
| 1          | coding    |
| 0.670175   | coding    |
| 0.998402   | coding    |
| 0.998384   | coding    |
| 0.0307686  | noncoding |
| 0.0792815  | noncoding |
| 0.0275767  | noncoding |
| 0.087168   | noncoding |
| 0.057302   | noncoding |
| 0.0891892  | noncoding |
| 0.999996   | coding    |
| 1          | coding    |
| 0.999999   | coding    |
| 1          | coding    |
| 1          | coding    |

|           |           |
|-----------|-----------|
| 0.999999  | coding    |
| 1         | coding    |
| 0.0203387 | noncoding |
| 1         | coding    |
| 1         | coding    |
| 1         | coding    |
| 0.0531513 | noncoding |
| 0.0679544 | noncoding |
| 1         | coding    |
| 1         | coding    |
| 0.0984078 | noncoding |
| 1         | coding    |
| 1         | coding    |
| 1         | coding    |
| 0.974728  | coding    |
| 0.253594  | noncoding |
| 0.489757  | noncoding |
| 1         | coding    |
| 1         | coding    |
| 0.993869  | coding    |
| 1         | coding    |
| 0.107884  | noncoding |
| 0.999997  | coding    |
| 0.998544  | coding    |
| 0.921838  | coding    |
| 1         | coding    |
| 1         | coding    |
| 1         | coding    |
| 0.999978  | coding    |
| 1         | coding    |
| 1         | coding    |
| 0.999949  | coding    |
| 0.998743  | coding    |
| 0.999999  | coding    |
| 0.186976  | noncoding |
| 0.0198451 | noncoding |
| 1         | coding    |
| 1         | coding    |
| 0.999767  | coding    |
| 0.02234   | noncoding |
| 1         | coding    |
| 1         | coding    |
| 0.0770288 | noncoding |
| 0.658393  | coding    |
| 0.928818  | coding    |
| 1         | coding    |
| 1         | coding    |
| 0.99994   | coding    |
| 0.828037  | coding    |
| 0.792609  | coding    |

|            |           |
|------------|-----------|
| 1          | coding    |
| 1          | coding    |
| 0.00558444 | noncoding |
| 0.992682   | coding    |
| 0.988311   | coding    |
| 0.999914   | coding    |
| 0.999929   | coding    |
| 1          | coding    |
| 0.999949   | coding    |
| 1          | coding    |
| 0.999994   | coding    |
| 1          | coding    |
| 1          | coding    |
| 0.998798   | coding    |
| 0.996437   | coding    |
| 0.997731   | coding    |
| 1          | coding    |
| 1          | coding    |
| 0.0737721  | noncoding |
| 1          | coding    |
| 1          | coding    |
| 0.999999   | coding    |
| 0.075596   | noncoding |
| 0.63021    | coding    |
| 0.463227   | noncoding |
| 0.373524   | noncoding |
| 1          | coding    |
| 0.966954   | coding    |
| 0.860933   | coding    |
| 0.947916   | coding    |
| 0.0536126  | noncoding |
| 0.0510462  | noncoding |
| 1          | coding    |
| 1          | coding    |
| 1          | coding    |
| 0.0578554  | noncoding |
| 1          | coding    |
| 0.988021   | coding    |
| 0.999495   | coding    |
| 0.138488   | noncoding |
| 0.999641   | coding    |
| 0.541916   | coding    |
| 0.0794491  | noncoding |
| 0.999625   | coding    |
| 0.063644   | noncoding |
| 1          | coding    |
| 0.996643   | coding    |
| 0.0454223  | noncoding |
| 0.420556   | noncoding |
| 1          | coding    |

[illegible]

[illegible]

|            |           |
|------------|-----------|
| 1          | coding    |
| 0.999543   | coding    |
| 0.9929     | coding    |
| 1          | coding    |
| 0.992921   | coding    |
| 0.35526    | noncoding |
| 0.573879   | coding    |
| 0.0379179  | noncoding |
| 0.449246   | noncoding |
| 1          | coding    |
| 0.119823   | noncoding |
| 0.812909   | coding    |
| 0.161901   | noncoding |
| 0.925489   | coding    |
| 0.228607   | noncoding |
| 0.0307335  | noncoding |
| 0.947022   | coding    |
| 0.999985   | coding    |
| 0.0620097  | noncoding |
| 0.0284871  | noncoding |
| 0.0844619  | noncoding |
| 1          | coding    |
| 1          | coding    |
| 0.00183943 | noncoding |
| 0.116162   | noncoding |
| 0.0319865  | noncoding |
| 1          | coding    |
| 0.00885101 | noncoding |
| 0.999038   | coding    |
| 1          | coding    |
| 0.267068   | noncoding |
| 1          | coding    |
| 0.365432   | noncoding |
| 0.0419069  | noncoding |
| 0.444815   | noncoding |
| 1          | coding    |
| 1          | coding    |
| 0.605128   | coding    |
| 0.0174615  | noncoding |
| 0.0124371  | noncoding |
| 0.0233431  | noncoding |
| 1          | coding    |
| 1          | coding    |
| 0.0281074  | noncoding |
| 1          | coding    |

|           |           |
|-----------|-----------|
| 0.0596309 | noncoding |
| 0.597651  | coding    |
| 0.0658156 | noncoding |
| 1         | coding    |
| 0.0338981 | noncoding |
| 0.0244031 | noncoding |
| 0.999997  | coding    |
| 0.997197  | coding    |
| 0.995656  | coding    |
| 0.99512   | coding    |
| 0.0230158 | noncoding |
| 1         | coding    |
| 0.999992  | coding    |
| 1         | coding    |
| 0.0429307 | noncoding |
| 0.108618  | noncoding |
| 1         | coding    |
| 1         | coding    |
| 0.0456064 | noncoding |
| 0.0219607 | noncoding |
| 1         | coding    |
| 0.20029   | noncoding |
| 0.139839  | noncoding |
| 0.0496535 | noncoding |
| 0.997093  | coding    |
| 0.942211  | coding    |
| 1         | coding    |
| 0.141117  | noncoding |
| 1         | coding    |
| 0.0705998 | noncoding |
| 1         | coding    |
| 0.999873  | coding    |
| 0.096055  | noncoding |
| 1         | coding    |



|            |           |
|------------|-----------|
| 1          | coding    |
| 0.80772    | coding    |
| 1          | coding    |
| 1          | coding    |
| 0.886544   | coding    |
| 1          | coding    |
| 1          | coding    |
| 0.133372   | noncoding |
| 0.145526   | noncoding |
| 0.835204   | coding    |
| 0.00900152 | noncoding |
| 0.014816   | noncoding |
| 0.236059   | noncoding |
| 0.163124   | noncoding |
| 0.977873   | coding    |
| 0.973682   | coding    |
| 0.0814871  | noncoding |
| 0.698817   | coding    |
| 0.147214   | noncoding |
| 0.4651     | noncoding |
| 0.978431   | coding    |
| 0.977873   | coding    |
| 0.446661   | noncoding |
| 0.878795   | coding    |
| 0.895878   | coding    |
| 0.619669   | coding    |
| 0.978431   | coding    |
| 0.625889   | coding    |
| 0.814563   | coding    |
| 0.16341    | noncoding |
| 0.120938   | noncoding |
| 0.988266   | coding    |
| 0.351209   | noncoding |
| 0.998744   | coding    |
| 0.0495871  | noncoding |
| 0.99975    | coding    |
| 0.958694   | coding    |
| 0.0573658  | noncoding |
| 0.0349432  | noncoding |
| 0.0667681  | noncoding |
| 0.233661   | noncoding |
| 0.352355   | noncoding |
| 0.0819884  | noncoding |
| 0.158066   | noncoding |
| 0.464209   | noncoding |
| 0.431995   | noncoding |
| 0.254311   | noncoding |
| 0.0861151  | noncoding |
| 0.0242836  | noncoding |
| 0.758075   | coding    |
| 0.957821   | coding    |
| 1          | coding    |
| 0.999966   | coding    |
| 0.18831    | noncoding |

|           |           |
|-----------|-----------|
| 0.982421  | coding    |
| 0.0392828 | noncoding |
| 0.998248  | coding    |
| 0.992896  | coding    |
| 1         | coding    |
| 0.667185  | coding    |
| 0.5185    | coding    |
| 0.999997  | coding    |
| 0.99997   | coding    |
| 0.0493506 | noncoding |
| 0.999999  | coding    |
| 0.987647  | coding    |
| 0.234164  | noncoding |
| 0.363757  | noncoding |
| 0.0693349 | noncoding |
| 0.0821841 | noncoding |
| 0.999375  | coding    |
| 0.999503  | coding    |
| 0.0779329 | noncoding |
| 0.668479  | coding    |
| 0.0273417 | noncoding |
| 0.999662  | coding    |
| 0.0898776 | noncoding |
| 0.444647  | noncoding |
| 0.999991  | coding    |
| 1         | coding    |
| 1         | coding    |
| 1         | coding    |
| 0.999127  | coding    |
| 0.999276  | coding    |
| 0.999276  | coding    |
| 0.987372  | coding    |
| 0.999717  | coding    |
| 0.970325  | coding    |
| 1         | coding    |
| 0.0768475 | noncoding |
| 0.929712  | coding    |
| 1         | coding    |
| 0.999999  | coding    |
| 1         | coding    |
| 1         | coding    |
| 0.396549  | noncoding |
| 0.117197  | noncoding |
| 0.0450938 | noncoding |
| 1         | coding    |
| 0.0237713 | noncoding |
| 1         | coding    |
| 0.0150839 | noncoding |
| 0.792057  | coding    |
| 0.986877  | coding    |
| 1         | coding    |
| 0.0747834 | noncoding |
| 0.0525468 | noncoding |
| 0.203665  | noncoding |

|           |           |
|-----------|-----------|
| 0.999913  | coding    |
| 0.999536  | coding    |
| 0.0164801 | noncoding |
| 0.0896571 | noncoding |
| 0.0284372 | noncoding |
| 0.40139   | noncoding |
| 0.0136031 | noncoding |
| 0.0509279 | noncoding |
| 0.0632831 | noncoding |
| 0.0190984 | noncoding |
| 0.170042  | noncoding |
| 0.0170692 | noncoding |
| 0.936829  | coding    |
| 0.311174  | noncoding |
| 0.999999  | coding    |
| 0.999997  | coding    |
| 0.999995  | coding    |
| 0.999989  | coding    |
| 1         | coding    |
| 0.0266345 | noncoding |
| 1         | coding    |
| 0.0131754 | noncoding |
| 0.044273  | noncoding |
| 0.273093  | noncoding |
| 0.999986  | coding    |
| 0.675647  | coding    |
| 0.0264644 | noncoding |
| 0.185592  | noncoding |
| 0.228632  | noncoding |
| 1         | coding    |
| 1         | coding    |
| 0.389482  | noncoding |
| 0.999505  | coding    |
| 0.999987  | coding    |
| 0.999991  | coding    |
| 1         | coding    |
| 0.997296  | coding    |
| 0.999052  | coding    |
| 0.167111  | noncoding |
| 1         | coding    |
| 1         | coding    |
| 0.523451  | coding    |
| 1         | coding    |
| 1         | coding    |
| 0.153843  | noncoding |
| 0.350855  | noncoding |
| 1         | coding    |
| 1         | coding    |
| 1         | coding    |
| 0.117217  | noncoding |
| 0.120429  | noncoding |
| 0.0491497 | noncoding |
| 0.0217848 | noncoding |
| 0.0848205 | noncoding |

|            |           |
|------------|-----------|
| 0.383918   | noncoding |
| 0.0128036  | noncoding |
| 0.99812    | coding    |
| 0.22266    | noncoding |
| 1          | coding    |
| 1          | coding    |
| 0.85458    | coding    |
| 0.993898   | coding    |
| 1          | coding    |
| 0.088635   | noncoding |
| 0.0337073  | noncoding |
| 0.0416632  | noncoding |
| 0.999423   | coding    |
| 0.0538331  | noncoding |
| 0.0523947  | noncoding |
| 0.0117832  | noncoding |
| 0.00210648 | noncoding |
| 0.685118   | coding    |
| 0.685118   | coding    |
| 0.115669   | noncoding |
| 0.0167644  | noncoding |
| 0.101056   | noncoding |
| 0.793047   | coding    |
| 0.064869   | noncoding |
| 0.0168395  | noncoding |
| 0.00980375 | noncoding |
| 0.0995377  | noncoding |
| 0.0740008  | noncoding |
| 0.0339555  | noncoding |
| 0.0225629  | noncoding |
| 0.364196   | noncoding |
| 0.951505   | coding    |
| 0.999918   | coding    |
| 0.999997   | coding    |
| 0.2329     | noncoding |
| 0.123058   | noncoding |
| 0.161085   | noncoding |
| 0.0182651  | noncoding |
| 1          | coding    |
| 0.999999   | coding    |
| 0.959799   | coding    |
| 0.501646   | coding    |
| 0.0492253  | noncoding |
| 0.141542   | noncoding |
| 0.0498239  | noncoding |
| 1          | coding    |
| 1          | coding    |
| 0.183961   | noncoding |
| 0.047812   | noncoding |

|            |           |
|------------|-----------|
| 1          | coding    |
| 1          | coding    |
| 0.00379008 | noncoding |
| 1          | coding    |
| 0.272701   | noncoding |
| 0.999961   | coding    |
| 0.443879   | noncoding |
| 0.962656   | coding    |
| 0.999999   | coding    |
| 0.0440195  | noncoding |
| 0.0387741  | noncoding |
| 0.168164   | noncoding |
| 0.999985   | coding    |
| 0.973658   | coding    |
| 0.440193   | noncoding |
| 0.0640552  | noncoding |
| 0.994862   | coding    |
| 0.72262    | coding    |
| 1          | coding    |
| 1          | coding    |
| 0.999988   | coding    |
| 0.019861   | noncoding |
| 1          | coding    |
| 0.17331    | noncoding |
| 0.915759   | coding    |
| 0.999977   | coding    |
| 0.999508   | coding    |
| 0.813994   | coding    |
| 0.318423   | noncoding |
| 1          | coding    |
| 0.0337522  | noncoding |
| 0.120138   | noncoding |
| 0.0222227  | noncoding |
| 0.999869   | coding    |
| 1          | coding    |
| 0.378789   | noncoding |
| 1          | coding    |
| 0.0192534  | noncoding |
| 0.999985   | coding    |
| 1          | coding    |
| 0.104746   | noncoding |
| 0.650008   | coding    |
| 0.081676   | noncoding |
| 0.499516   | noncoding |

|           |           |
|-----------|-----------|
| 0.712107  | coding    |
| 0.949346  | coding    |
| 0.987337  | coding    |
| 0.997221  | coding    |
| 0.445684  | noncoding |
| 0.228286  | noncoding |
| 0.406315  | noncoding |
| 0.994441  | coding    |
| 0.999413  | coding    |
| 0.173567  | noncoding |
| 0.999997  | coding    |
| 0.947079  | coding    |
| 0.0131511 | noncoding |
| 1         | coding    |
| 1         | coding    |
| 0.0127564 | noncoding |
| 1         | coding    |
| 0.999999  | coding    |
| 0.204442  | noncoding |
| 0.108832  | noncoding |
| 1         | coding    |
| 0.395864  | noncoding |
| 1         | coding    |
| 0.256748  | noncoding |
| 0.0190609 | noncoding |
| 1         | coding    |
| 1         | coding    |
| 1         | coding    |
| 0.0558903 | noncoding |
| 0.040563  | noncoding |
| 0.0356119 | noncoding |
| 0.0332954 | noncoding |
| 0.040919  | noncoding |
| 0.0225865 | noncoding |
| 0.110024  | noncoding |
| 1         | coding    |
| 0.180107  | noncoding |
| 0.239777  | noncoding |
| 0.198944  | noncoding |
| 0.0723444 | noncoding |
| 0.999309  | coding    |
| 0.999827  | coding    |
| 0.0787551 | noncoding |
| 0.158689  | noncoding |
| 0.272069  | noncoding |
| 0.829998  | coding    |
| 0.417923  | noncoding |
| 0.914833  | coding    |
| 0.829817  | coding    |
| 0.0475895 | noncoding |
| 1         | coding    |

|            |           |
|------------|-----------|
| 1          | coding    |
| 0.00996146 | noncoding |
| 0.043483   | noncoding |
| 0.0131135  | noncoding |
| 0.437855   | noncoding |
| 0.0601233  | noncoding |
| 0.715502   | coding    |
| 1          | coding    |
| 0.0969097  | noncoding |
| 0.0552338  | noncoding |
| 1          | coding    |
| 1          | coding    |
| 0.999875   | coding    |
| 0.191196   | noncoding |
| 0.168356   | noncoding |
| 0.0955229  | noncoding |
| 1          | coding    |
| 0.996407   | coding    |
| 0.148113   | noncoding |
| 0.0209126  | noncoding |
| 1          | coding    |
| 0.190736   | noncoding |
| 0.0700185  | noncoding |
| 0.351615   | noncoding |
| 0.0694223  | noncoding |
| 0.881145   | coding    |
| 0.0244393  | noncoding |
| 0.999993   | coding    |
| 1          | coding    |
| 0.0237532  | noncoding |
| 1          | coding    |
| 0.0675715  | noncoding |
| 1          | coding    |
| 1          | coding    |
| 0.995325   | coding    |
| 0.416998   | noncoding |
| 0.384108   | noncoding |
| 0.836829   | coding    |
| 0.0429351  | noncoding |
| 1          | coding    |
| 0.999954   | coding    |
| 0.999998   | coding    |
| 1          | coding    |
| 0.0310439  | noncoding |
| 1          | coding    |
| 0.356763   | noncoding |
| 1          | coding    |

|            |           |
|------------|-----------|
| 1          | coding    |
| 0.0200288  | noncoding |
| 0.0479209  | noncoding |
| 1          | coding    |
| 0.13011    | noncoding |
| 0.00808808 | noncoding |
| 0.0434202  | noncoding |
| 0.0324687  | noncoding |
| 1          | coding    |
| 1          | coding    |
| 0.186861   | noncoding |
| 1          | coding    |
| 0.0278554  | noncoding |
| 1          | coding    |
| 0.078133   | noncoding |
| 0.999871   | coding    |
| 0.99998    | coding    |
| 0.212653   | noncoding |
| 0.240868   | noncoding |
| 0.0276465  | noncoding |
| 0.253812   | noncoding |
| 0.0655056  | noncoding |
| 0.271538   | noncoding |
| 0.166688   | noncoding |
| 0.0085817  | noncoding |
| 0.999888   | coding    |
| 0.999757   | coding    |
| 1          | coding    |
| 0.161336   | noncoding |
| 0.0887603  | noncoding |
| 1          | coding    |
| 1          | coding    |
| 0.00998937 | noncoding |
| 1          | coding    |
| 0.998287   | coding    |
| 0.973673   | coding    |
| 0.406468   | noncoding |
| 0.0407544  | noncoding |
| 0.623223   | coding    |
| 0.186261   | noncoding |
| 0.0360819  | noncoding |
| 0.997955   | coding    |
| 0.959267   | coding    |
| 0.979393   | coding    |
| 0.998698   | coding    |
| 0.00821354 | noncoding |



|           |           |
|-----------|-----------|
| 0.450604  | noncoding |
| 0.952035  | coding    |
| 0.965286  | coding    |
| 0.0878981 | noncoding |
| 0.396638  | noncoding |
| 0.999957  | coding    |
| 0.191568  | noncoding |
| 0.193862  | noncoding |
| 0.771532  | coding    |
| 0.893023  | coding    |
| 0.940093  | coding    |
| 0.074056  | noncoding |
| 0.045864  | noncoding |
| 1         | coding    |
| 0.177761  | noncoding |
| 1         | coding    |
| 0.355756  | noncoding |
| 0.998374  | coding    |
| 0.0432835 | noncoding |
| 1         | coding    |
| 1         | coding    |
| 0.0846903 | noncoding |
| 0.134195  | noncoding |
| 1         | coding    |
| 0.854407  | coding    |
| 0.0693635 | noncoding |
| 1         | coding    |
| 0.881001  | coding    |
| 0.45353   | noncoding |
| 0.0894182 | noncoding |
| 0.120396  | noncoding |
| 0.0309495 | noncoding |
| 0.46626   | noncoding |
| 0.0697033 | noncoding |
| 0.517183  | coding    |
| 0.100971  | noncoding |
| 0.15525   | noncoding |
| 0.944257  | coding    |
| 0.0172818 | noncoding |
| 0.169027  | noncoding |
| 0.164624  | noncoding |
| 0.201665  | noncoding |
| 0.205593  | noncoding |
| 1         | coding    |
| 1         | coding    |
| 1         | coding    |
| 0.225149  | noncoding |
| 0.998015  | coding    |
| 1         | coding    |
| 1         | coding    |

|           |           |
|-----------|-----------|
| 1         | coding    |
| 1         | coding    |
| 0.99999   | coding    |
| 0.14955   | noncoding |
| 0.108256  | noncoding |
| 0.999776  | coding    |
| 0.944992  | coding    |
| 0.99999   | coding    |
| 0.0116085 | noncoding |
| 0.142546  | noncoding |
| 0.0684873 | noncoding |
| 0.168202  | noncoding |
| 0.105414  | noncoding |
| 1         | coding    |
| 0.0709982 | noncoding |
| 1         | coding    |
| 1         | coding    |
| 1         | coding    |
| 0.0222949 | noncoding |
| 0.477447  | noncoding |
| 0.310017  | noncoding |
| 0.999973  | coding    |
| 0.999998  | coding    |
| 1         | coding    |
| 0.0287849 | noncoding |
| 1         | coding    |
| 0.999999  | coding    |
| 0.12465   | noncoding |
| 0.982075  | coding    |
| 1         | coding    |
| 0.141662  | noncoding |
| 0.997428  | coding    |
| 0.998561  | coding    |
| 0.995596  | coding    |
| 0.171135  | noncoding |
| 1         | coding    |
| 0.0415733 | noncoding |
| 0.0269716 | noncoding |
| 0.0564182 | noncoding |

|           |           |
|-----------|-----------|
| 0.0288711 | noncoding |
| 1         | coding    |
| 1         | coding    |
| 1         | coding    |
| 0.999979  | coding    |
| 1         | coding    |
| 0.999902  | coding    |
| 0.22933   | noncoding |
| 0.179844  | noncoding |
| 0.568963  | coding    |
| 0.191021  | noncoding |
| 0.166682  | noncoding |
| 0.170634  | noncoding |
| 0.0460472 | noncoding |
| 0.168933  | noncoding |
| 0.0702814 | noncoding |
| 0.982529  | coding    |
| 0.86602   | coding    |
| 0.999978  | coding    |
| 1         | coding    |
| 0.999999  | coding    |
| 1         | coding    |
| 0.999999  | coding    |
| 0.999998  | coding    |
| 1         | coding    |
| 0.0696012 | noncoding |
| 0.702102  | coding    |
| 0.0298379 | noncoding |
| 1         | coding    |
| 1         | coding    |
| 1         | coding    |
| 0.998747  | coding    |
| 0.972788  | coding    |
| 1         | coding    |
| 0.999994  | coding    |
| 0.957924  | coding    |
| 0.217223  | noncoding |
| 0.993152  | coding    |
| 0.629734  | coding    |
| 0.999718  | coding    |
| 0.629734  | coding    |
| 0.987265  | coding    |
| 0.997465  | coding    |
| 0.646744  | coding    |
| 1         | coding    |
| 0.976796  | coding    |

|            |           |
|------------|-----------|
| 1          | coding    |
| 0.0997431  | noncoding |
| 1          | coding    |
| 0.0168027  | noncoding |
| 0.0247619  | noncoding |
| 0.141742   | noncoding |
| 1          | coding    |
| 1          | coding    |
| 0.729042   | coding    |
| 1          | coding    |
| 0.865992   | coding    |
| 0.991171   | coding    |
| 0.255742   | noncoding |
| 0.341982   | noncoding |
| 0.999999   | coding    |
| 0.0221939  | noncoding |
| 0.105152   | noncoding |
| 0.906463   | coding    |
| 0.377559   | noncoding |
| 0.32189    | noncoding |
| 0.0699889  | noncoding |
| 0.999878   | coding    |
| 0.0840277  | noncoding |
| 0.0199327  | noncoding |
| 0.111341   | noncoding |
| 0.897019   | coding    |
| 1          | coding    |
| 0.999998   | coding    |
| 1          | coding    |
| 1          | coding    |
| 0.2276     | noncoding |
| 0.0368207  | noncoding |
| 1          | coding    |
| 0.999984   | coding    |
| 0.152011   | noncoding |
| 0.224007   | noncoding |
| 1          | coding    |
| 1          | coding    |
| 0.0375548  | noncoding |
| 0.999992   | coding    |
| 0.00632154 | noncoding |
| 0.978278   | coding    |
| 0.232672   | noncoding |
| 0.103237   | noncoding |
| 0.0293819  | noncoding |
| 1          | coding    |
| 0.0705945  | noncoding |
| 1          | coding    |
| 0.999987   | coding    |
| 0.00395    | noncoding |
| 0.99661    | coding    |

|           |           |
|-----------|-----------|
| 1         | coding    |
| 1         | coding    |
| 0.999429  | coding    |
| 0.238739  | noncoding |
| 0.747083  | coding    |
| 0.568678  | coding    |
| 0.0098809 | noncoding |
| 0.777257  | coding    |
| 0.744718  | coding    |
| 0.91515   | coding    |
| 0.99994   | coding    |
| 0.039713  | noncoding |
| 0.051413  | noncoding |
| 0.0295924 | noncoding |
| 0.478767  | noncoding |
| 0.0791249 | noncoding |
| 0.999888  | coding    |
| 0.196325  | noncoding |
| 1         | coding    |
| 0.14979   | noncoding |
| 0.860881  | coding    |
| 0.855127  | coding    |
| 0.198301  | noncoding |
| 1         | coding    |
| 1         | coding    |
| 0.999999  | coding    |
| 1         | coding    |
| 1         | coding    |
| 1         | coding    |
| 0.998912  | coding    |
| 0.225106  | noncoding |
| 0.960708  | coding    |
| 0.998768  | coding    |
| 1         | coding    |
| 1         | coding    |
| 0.0182692 | noncoding |
| 0.896177  | coding    |
| 0.107539  | noncoding |
| 0.0700998 | noncoding |
| 0.999999  | coding    |
| 1         | coding    |
| 1         | coding    |
| 1         | coding    |
| 0.153966  | noncoding |
| 1         | coding    |
| 0.0176859 | noncoding |
| 1         | coding    |
| 0.999991  | coding    |
| 0.302379  | noncoding |
| 0.221543  | noncoding |
| 0.978627  | coding    |
| 1         | coding    |
| 1         | coding    |
| 1         | coding    |

|           |           |
|-----------|-----------|
| 0.160798  | noncoding |
| 0.517461  | coding    |
| 1         | coding    |
| 0.0463434 | noncoding |
| 0.951083  | coding    |
| 0.0595354 | noncoding |
| 0.0463219 | noncoding |
| 1         | coding    |
| 0.133232  | noncoding |
| 0.145395  | noncoding |
| 0.0798627 | noncoding |
| 0.0964851 | noncoding |
| 1         | coding    |
| 1         | coding    |
| 0.0302044 | noncoding |
| 0.490994  | noncoding |
| 0.845915  | coding    |
| 0.100616  | noncoding |
| 0.106902  | noncoding |
| 0.999999  | coding    |
| 1         | coding    |
| 1         | coding    |
| 1         | coding    |
| 0.145368  | noncoding |
| 0.0181497 | noncoding |
| 0.38917   | noncoding |
| 0.12965   | noncoding |
| 0.206821  | noncoding |
| 1         | coding    |
| 1         | coding    |
| 1         | coding    |
| 0.02263   | noncoding |
| 0.0261539 | noncoding |
| 1         | coding    |
| 0.139106  | noncoding |
| 0.999987  | coding    |
| 0.951044  | coding    |
| 0.177953  | noncoding |
| 0.462603  | noncoding |
| 0.785527  | coding    |
| 0.549556  | coding    |
| 1         | coding    |
| 0.0990563 | noncoding |
| 1         | coding    |
| 0.999575  | coding    |
| 0.78989   | coding    |
| 0.0131768 | noncoding |
| 1         | coding    |
| 1         | coding    |
| 0.895033  | coding    |
| 0.311427  | noncoding |
| 0.311427  | noncoding |
| 0.136389  | noncoding |
| 0.330541  | noncoding |

|            |           |
|------------|-----------|
| 0.999578   | coding    |
| 0.999999   | coding    |
| 0.021735   | noncoding |
| 0.0236695  | noncoding |
| 0.0192773  | noncoding |
| 0.125278   | noncoding |
| 1          | coding    |
| 0.998105   | coding    |
| 0.992497   | coding    |
| 0.999994   | coding    |
| 0.280158   | noncoding |
| 0.289052   | noncoding |
| 0.0716584  | noncoding |
| 1          | coding    |
| 0.352663   | noncoding |
| 0.825383   | coding    |
| 0.0603153  | noncoding |
| 0.0259661  | noncoding |
| 0.999889   | coding    |
| 0.996336   | coding    |
| 0.981536   | coding    |
| 1          | coding    |
| 0.99999    | coding    |
| 0.988784   | coding    |
| 1          | coding    |
| 0.00381501 | noncoding |
| 1          | coding    |
| 0.0146734  | noncoding |
| 0.19865    | noncoding |
| 0.0593537  | noncoding |
| 0.0139342  | noncoding |
| 0.111066   | noncoding |
| 0.0184998  | noncoding |
| 0.00576154 | noncoding |
| 0.194307   | noncoding |
| 0.199629   | noncoding |
| 0.0764523  | noncoding |
| 0.25695    | noncoding |
| 0.163096   | noncoding |
| 0.482736   | noncoding |
| 1          | coding    |
| 1          | coding    |
| 0.344882   | noncoding |
| 1          | coding    |
| 0.0233205  | noncoding |
| 0.0179298  | noncoding |

|            |           |
|------------|-----------|
| 0.0674704  | noncoding |
| 0.0211147  | noncoding |
| 0.0256228  | noncoding |
| 0.0119842  | noncoding |
| 0.0372559  | noncoding |
| 0.0242165  | noncoding |
| 0.110312   | noncoding |
| 0.0246192  | noncoding |
| 0.115406   | noncoding |
| 0.0525795  | noncoding |
| 0.00891708 | noncoding |
| 0.0113067  | noncoding |
| 0.0104959  | noncoding |
| 0.00871837 | noncoding |
| 0.00432776 | noncoding |
| 0.0112592  | noncoding |
| 0.999999   | coding    |
| 0.999999   | coding    |
| 0.168502   | noncoding |
| 0.999487   | coding    |
| 1          | coding    |
| 0.0258121  | noncoding |
| 1          | coding    |
| 1          | coding    |
| 1          | coding    |
| 0.999998   | coding    |
| 0.0954845  | noncoding |
| 1          | coding    |
| 0.12632    | noncoding |
| 1          | coding    |
| 0.0834456  | noncoding |
| 0.999999   | coding    |
| 0.999999   | coding    |
| 1          | coding    |
| 0.999998   | coding    |
| 0.999992   | coding    |
| 0.996917   | coding    |
| 0.999156   | coding    |
| 1          | coding    |
| 1          | coding    |
| 0.0508144  | noncoding |
| 1          | coding    |
| 1          | coding    |
| 0.0271309  | noncoding |
| 0.0956941  | noncoding |
| 0.0724958  | noncoding |
| 0.0982916  | noncoding |
| 0.0138487  | noncoding |
| 0.977784   | coding    |
| 0.999669   | coding    |



|           |           |
|-----------|-----------|
| 0.999998  | coding    |
| 0.999998  | coding    |
| 1         | coding    |
| 1         | coding    |
| 0.0328898 | noncoding |
| 0.305248  | noncoding |
| 1         | coding    |
| 0.697891  | coding    |
| 0.0742053 | noncoding |
| 0.117493  | noncoding |
| 0.999962  | coding    |
| 1         | coding    |
| 0.290786  | noncoding |
| 0.879689  | coding    |
| 0.566258  | coding    |
| 0.189489  | noncoding |
| 0.782743  | coding    |
| 0.0823632 | noncoding |
| 0.329463  | noncoding |
| 0.0114124 | noncoding |
| 0.220021  | noncoding |
| 0.0758916 | noncoding |
| 0.0524507 | noncoding |
| 0.349835  | noncoding |
| 0.131928  | noncoding |
| 0.149936  | noncoding |
| 0.106837  | noncoding |
| 0.071795  | noncoding |
| 0.129514  | noncoding |
| 0.0412291 | noncoding |
| 0.0293363 | noncoding |
| 0.0341746 | noncoding |
| 0.999998  | coding    |
| 0.983041  | coding    |
| 0.257609  | noncoding |
| 0.382292  | noncoding |
| 1         | coding    |
| 0.0549044 | noncoding |
| 0.124321  | noncoding |
| 1         | coding    |
| 1         | coding    |
| 0.698161  | coding    |
| 0.992275  | coding    |
| 0.0041721 | noncoding |
| 0.999812  | coding    |
| 1         | coding    |
| 1         | coding    |
| 0.0252446 | noncoding |
| 1         | coding    |
| 1         | coding    |

|            |           |
|------------|-----------|
| 1          | coding    |
| 1          | coding    |
| 0.142874   | noncoding |
| 1          | coding    |
| 0.999814   | coding    |
| 0.563756   | coding    |
| 1          | coding    |
| 0.00273832 | noncoding |
| 0.391184   | noncoding |
| 0.854106   | coding    |
| 0.0861349  | noncoding |
| 0.69127    | coding    |
| 0.999994   | coding    |
| 0.0424624  | noncoding |
| 0.252152   | noncoding |
| 0.236715   | noncoding |
| 0.233444   | noncoding |
| 0.148305   | noncoding |
| 0.031019   | noncoding |
| 0.403009   | noncoding |
| 0.0503274  | noncoding |
| 0.0708453  | noncoding |
| 0.851026   | coding    |
| 0.80539    | coding    |
| 0.104638   | noncoding |
| 0.0604304  | noncoding |
| 0.0747774  | noncoding |
| 0.619834   | coding    |
| 0.101428   | noncoding |
| 0.485265   | noncoding |
| 0.0949774  | noncoding |
| 0.913929   | coding    |
| 0.880367   | coding    |
| 0.135033   | noncoding |
| 0.037516   | noncoding |
| 0.0769613  | noncoding |
| 1          | coding    |
| 1          | coding    |
| 0.7969     | coding    |
| 0.775923   | coding    |
| 0.0347586  | noncoding |
| 0.0146155  | noncoding |
| 0.184716   | noncoding |
| 0.911124   | coding    |
| 0.00394961 | noncoding |
| 0.244474   | noncoding |
| 0.0409357  | noncoding |
| 0.514338   | coding    |
| 0.107056   | noncoding |
| 0.247561   | noncoding |

[illegible]

|            |           |
|------------|-----------|
| 0.188958   | noncoding |
| 0.537901   | coding    |
| 0.0528313  | noncoding |
| 0.166865   | noncoding |
| 0.390897   | noncoding |
| 0.369123   | noncoding |
| 0.560288   | coding    |
| 1          | coding    |
| 1          | coding    |
| 1          | coding    |
| 0.581567   | coding    |
| 1          | coding    |
| 0.557827   | coding    |
| 0.063572   | noncoding |
| 0.0467986  | noncoding |
| 0.0992546  | noncoding |
| 0.998431   | coding    |
| 0.999945   | coding    |
| 1          | coding    |
| 0.325988   | noncoding |
| 0.0350148  | noncoding |
| 0.0835546  | noncoding |
| 0.716807   | coding    |
| 0.717115   | coding    |
| 0.0267197  | noncoding |
| 0.610106   | coding    |
| 0.220815   | noncoding |
| 0.239836   | noncoding |
| 0.212015   | noncoding |
| 0.612214   | coding    |
| 0.0267197  | noncoding |
| 0.600499   | coding    |
| 0.26047    | noncoding |
| 1          | coding    |
| 0.0465399  | noncoding |
| 0.0547133  | noncoding |
| 0.14866    | noncoding |
| 0.205298   | noncoding |
| 0.199603   | noncoding |
| 0.245813   | noncoding |
| 0.188724   | noncoding |
| 0.00988628 | noncoding |
| 0.221005   | noncoding |
| 1          | coding    |

|           |           |
|-----------|-----------|
| 0.897041  | coding    |
| 0.24332   | noncoding |
| 1         | coding    |
| 0.0150336 | noncoding |
| 1         | coding    |
| 1         | coding    |
| 1         | coding    |
| 0.999912  | coding    |
| 1         | coding    |
| 0.170141  | noncoding |
| 0.0141236 | noncoding |
| 0.0166285 | noncoding |
| 0.0795537 | noncoding |
| 0.126173  | noncoding |
| 1         | coding    |
| 1         | coding    |
| 0.112821  | noncoding |
| 0.0403069 | noncoding |
| 0.140356  | noncoding |
| 0.0891038 | noncoding |
| 0.0786444 | noncoding |
| 0.995169  | coding    |
| 0.999506  | coding    |
| 0.996664  | coding    |
| 0.999993  | coding    |
| 1         | coding    |
| 0.0432401 | noncoding |
| 0.08241   | noncoding |
| 0.200354  | noncoding |
| 0.224865  | noncoding |
| 0.485045  | noncoding |
| 0.137964  | noncoding |
| 0.999544  | coding    |
| 0.0640293 | noncoding |
| 0.0401488 | noncoding |
| 0.314117  | noncoding |
| 0.999994  | coding    |
| 0.848007  | coding    |
| 0.999999  | coding    |
| 0.0302119 | noncoding |
| 0.999997  | coding    |
| 1         | coding    |
| 0.020159  | noncoding |
| 0.108001  | noncoding |
| 0.0178391 | noncoding |
| 0.0134347 | noncoding |
| 0.0143449 | noncoding |
| 0.927729  | coding    |

|           |           |
|-----------|-----------|
| 0.999431  | coding    |
| 0.938053  | coding    |
| 0.902867  | coding    |
| 1         | coding    |
| 0.045327  | noncoding |
| 0.16618   | noncoding |
| 1         | coding    |
| 0.987601  | coding    |
| 0.0192646 | noncoding |
| 0.560548  | coding    |
| 0.193516  | noncoding |
| 0.0192087 | noncoding |
| 0.0192087 | noncoding |
| 0.328947  | noncoding |
| 0.338824  | noncoding |
| 0.0476291 | noncoding |
| 0.45172   | noncoding |
| 0.122597  | noncoding |
| 0.032978  | noncoding |
| 1         | coding    |
| 1         | coding    |
| 0.99979   | coding    |
| 0.837821  | coding    |
| 0.0405014 | noncoding |
| 1         | coding    |
| 0.9998    | coding    |
| 0.99975   | coding    |
| 0.999931  | coding    |
| 0.999994  | coding    |
| 0.999995  | coding    |
| 1         | coding    |
| 0.34968   | noncoding |
| 0.62068   | coding    |
| 0.999282  | coding    |
| 0.948392  | coding    |
| 0.987135  | coding    |
| 1         | coding    |
| 0.973843  | coding    |
| 0.143166  | noncoding |
| 1         | coding    |
| 0.999973  | coding    |
| 0.947486  | coding    |
| 0.951198  | coding    |
| 0.015953  | noncoding |
| 1         | coding    |
| 0.913124  | coding    |
| 0.116121  | noncoding |

|            |           |
|------------|-----------|
| 0.44272    | noncoding |
| 0.725071   | coding    |
| 0.707435   | coding    |
| 0.0271635  | noncoding |
| 0.839906   | coding    |
| 0.102667   | noncoding |
| 1          | coding    |
| 1          | coding    |
| 1          | coding    |
| 0.0430604  | noncoding |
| 0.416222   | noncoding |
| 0.0606447  | noncoding |
| 0.059316   | noncoding |
| 0.00273376 | noncoding |
| 0.127748   | noncoding |
| 1          | coding    |
| 1          | coding    |
| 0.0346551  | noncoding |
| 0.517678   | coding    |
| 1          | coding    |
| 0.408472   | noncoding |
| 0.999999   | coding    |
| 0.999962   | coding    |
| 1          | coding    |
| 0.848621   | coding    |
| 1          | coding    |
| 0.0156938  | noncoding |
| 0.00494089 | noncoding |
| 0.0284203  | noncoding |
| 0.999841   | coding    |
| 0.996536   | coding    |
| 0.139452   | noncoding |
| 0.0222296  | noncoding |
| 0.0176255  | noncoding |
| 1          | coding    |
| 0.0343505  | noncoding |
| 0.0472985  | noncoding |
| 0.112406   | noncoding |
| 0.311548   | noncoding |
| 1          | coding    |
| 0.999785   | coding    |
| 0.00598152 | noncoding |
| 0.28054    | noncoding |
| 0.377177   | noncoding |
| 0.438011   | noncoding |
| 1          | coding    |
| 0.707968   | coding    |

|            |           |
|------------|-----------|
| 0.357809   | noncoding |
| 1          | coding    |
| 0.0920987  | noncoding |
| 0.744492   | coding    |
| 0.0263569  | noncoding |
| 1          | coding    |
| 0.48736    | noncoding |
| 0.0710508  | noncoding |
| 0.0358538  | noncoding |
| 0.0396908  | noncoding |
| 0.0159923  | noncoding |
| 0.999999   | coding    |
| 1          | coding    |
| 1          | coding    |
| 0.0415182  | noncoding |
| 1          | coding    |
| 0.999947   | coding    |
| 1          | coding    |
| 0.788231   | coding    |
| 0.0359519  | noncoding |
| 0.00263605 | noncoding |
| 0.113221   | noncoding |
| 0.836839   | coding    |
| 0.0419277  | noncoding |
| 1          | coding    |
| 1          | coding    |
| 1          | coding    |
| 0.103627   | noncoding |
| 0.999998   | coding    |
| 0.999997   | coding    |
| 0.993165   | coding    |
| 0.0109094  | noncoding |
| 0.993671   | coding    |
| 0.992813   | coding    |
| 0.994992   | coding    |
| 0.985167   | coding    |
| 0.985969   | coding    |



|            |           |
|------------|-----------|
| 1          | coding    |
| 0.0932741  | noncoding |
| 0.63685    | coding    |
| 1          | coding    |
| 1          | coding    |
| 0.0154762  | noncoding |
| 0.0106713  | noncoding |
| 0.00496677 | noncoding |
| 0.0165104  | noncoding |
| 1          | coding    |
| 1          | coding    |
| 1          | coding    |
| 0.1069     | noncoding |
| 0.350157   | noncoding |
| 0.349094   | noncoding |
| 1          | coding    |
| 0.0645597  | noncoding |
| 1          | coding    |
| 0.999999   | coding    |
| 1          | coding    |
| 0.0408487  | noncoding |
| 1          | coding    |
| 0.999986   | coding    |
| 0.0941837  | noncoding |
| 0.0676519  | noncoding |
| 0.0861715  | noncoding |
| 0.177757   | noncoding |
| 0.012675   | noncoding |
| 0.152908   | noncoding |
| 0.095686   | noncoding |
| 0.138852   | noncoding |
| 0.104277   | noncoding |
| 0.133169   | noncoding |
| 0.385016   | noncoding |
| 0.991027   | coding    |
| 0.175699   | noncoding |
| 0.334657   | noncoding |
| 0.0706866  | noncoding |
| 0.221299   | noncoding |
| 1          | coding    |
| 0.171102   | noncoding |
| 0.416432   | noncoding |
| 0.0951685  | noncoding |
| 1          | coding    |
| 0.0533248  | noncoding |
| 1          | coding    |
| 0.972752   | coding    |
| 1          | coding    |
| 1          | coding    |
| 0.0177264  | noncoding |
| 0.00332013 | noncoding |
| 0.0590287  | noncoding |
| 1          | coding    |
| 1          | coding    |

|            |           |
|------------|-----------|
| 0.0162096  | noncoding |
| 1          | coding    |
| 0.114303   | noncoding |
| 0.0127966  | noncoding |
| 0.13988    | noncoding |
| 0.999998   | coding    |
| 1          | coding    |
| 1          | coding    |
| 0.391468   | noncoding |
| 0.548555   | coding    |
| 0.0631648  | noncoding |
| 0.0378189  | noncoding |
| 0.999701   | coding    |
| 1          | coding    |
| 0.00652095 | noncoding |
| 0.999701   | coding    |
| 0.320057   | noncoding |
| 1          | coding    |
| 0.0365365  | noncoding |
| 0.0877825  | noncoding |
| 0.880025   | coding    |
| 1          | coding    |
| 0.271904   | noncoding |
| 0.999994   | coding    |
| 1          | coding    |
| 1          | coding    |
| 1          | coding    |
| 0.0195408  | noncoding |
| 0.992851   | coding    |
| 1          | coding    |
| 0.0613187  | noncoding |
| 0.0464619  | noncoding |
| 1          | coding    |
| 0.0633289  | noncoding |
| 1          | coding    |
| 0.91915    | coding    |
| 0.16897    | noncoding |
| 0.0554221  | noncoding |
| 0.777253   | coding    |
| 0.0935389  | noncoding |
| 1          | coding    |
| 0.0671802  | noncoding |
| 1          | coding    |
| 1          | coding    |

|           |           |
|-----------|-----------|
| 0.0180929 | noncoding |
| 0.531296  | coding    |
| 0.0286347 | noncoding |
| 0.382372  | noncoding |
| 0.0335682 | noncoding |
| 0.0755007 | noncoding |
| 0.138191  | noncoding |
| 0.0686549 | noncoding |
| 0.0684709 | noncoding |
| 0.0839975 | noncoding |
| 1         | coding    |
| 0.287675  | noncoding |
| 0.221796  | noncoding |
| 0.742675  | coding    |
| 0.908499  | coding    |
| 0.988922  | coding    |
| 0.883027  | coding    |
| 0.621667  | coding    |
| 0.154825  | noncoding |
| 0.203556  | noncoding |
| 0.199139  | noncoding |
| 0.877317  | coding    |
| 0.999933  | coding    |
| 0.999989  | coding    |
| 0.999981  | coding    |
| 0.0349013 | noncoding |
| 0.0102214 | noncoding |
| 0.0338241 | noncoding |
| 0.0284919 | noncoding |
| 1         | coding    |
| 0.352997  | noncoding |
| 0.534589  | coding    |
| 0.436839  | noncoding |
| 1         | coding    |
| 0.15646   | noncoding |
| 1         | coding    |
| 0.857332  | coding    |
| 0.892772  | coding    |
| 0.454368  | noncoding |
| 0.0903435 | noncoding |
| 0.0210268 | noncoding |
| 1         | coding    |
| 0.171535  | noncoding |
| 0.0428523 | noncoding |
| 0.31293   | noncoding |

|            |           |
|------------|-----------|
| 0.0587199  | noncoding |
| 1          | coding    |
| 1          | coding    |
| 0.999938   | coding    |
| 0.999958   | coding    |
| 0.0796285  | noncoding |
| 0.0848372  | noncoding |
| 0.00516634 | noncoding |
| 0.999862   | coding    |
| 0.999854   | coding    |
| 0.660423   | coding    |
| 0.991419   | coding    |
| 0.0384896  | noncoding |
| 0.0811652  | noncoding |
| 0.999998   | coding    |
| 1          | coding    |
| 1          | coding    |
| 1          | coding    |
| 0.0677617  | noncoding |
| 0.0278436  | noncoding |
| 0.37857    | noncoding |
| 0.116754   | noncoding |
| 1          | coding    |
| 0.857982   | coding    |
| 0.114795   | noncoding |
| 1          | coding    |
| 1          | coding    |
| 0.997401   | coding    |
| 0.99918    | coding    |
| 0.989769   | coding    |
| 0.996535   | coding    |
| 1          | coding    |
| 0.410783   | noncoding |
| 0.117907   | noncoding |
| 0.804207   | coding    |
| 0.429151   | noncoding |
| 0.115399   | noncoding |
| 0.144124   | noncoding |
| 0.0377052  | noncoding |
| 0.00298613 | noncoding |
| 0.999749   | coding    |
| 0.999031   | coding    |

|            |           |
|------------|-----------|
| 1          | coding    |
| 0.968722   | coding    |
| 0.0584534  | noncoding |
| 1          | coding    |
| 0.868002   | coding    |
| 0.727323   | coding    |
| 0.515583   | coding    |
| 0.513001   | coding    |
| 0.0526842  | noncoding |
| 0.0714057  | noncoding |
| 1          | coding    |
| 0.999977   | coding    |
| 0.0310584  | noncoding |
| 0.00540431 | noncoding |
| 0.954165   | coding    |
| 1          | coding    |
| 0.217006   | noncoding |
| 0.999995   | coding    |
| 0.463794   | noncoding |
| 0.140745   | noncoding |
| 0.805698   | coding    |
| 0.0348317  | noncoding |
| 0.945667   | coding    |
| 0.0109165  | noncoding |
| 0.999975   | coding    |
| 0.736254   | coding    |
| 0.993211   | coding    |
| 0.0910151  | noncoding |
| 0.0213532  | noncoding |
| 1          | coding    |
| 0.596929   | coding    |
| 1          | coding    |
| 0.531281   | coding    |
| 0.95694    | coding    |
| 0.0295269  | noncoding |
| 0.729064   | coding    |
| 0.0551938  | noncoding |
| 0.92115    | coding    |
| 0.0282213  | noncoding |
| 0.0297846  | noncoding |
| 0.0810947  | noncoding |
| 0.0184911  | noncoding |
| 0.0686632  | noncoding |
| 0.0415618  | noncoding |
| 0.0478821  | noncoding |
| 1          | coding    |
| 0.159206   | noncoding |
| 1          | coding    |
| 0.469338   | noncoding |
| 1          | coding    |
| 1          | coding    |
| 0.885063   | coding    |
| 0.909945   | coding    |
| 0.0141348  | noncoding |

|            |           |
|------------|-----------|
| 0.0704697  | noncoding |
| 0.056043   | noncoding |
| 0.0787689  | noncoding |
| 0.475387   | noncoding |
| 0.581494   | coding    |
| 0.702024   | coding    |
| 0.0331939  | noncoding |
| 0.0451607  | noncoding |
| 0.0406393  | noncoding |
| 1          | coding    |
| 1          | coding    |
| 1          | coding    |
| 0.06143    | noncoding |
| 0.180399   | noncoding |
| 0.756412   | coding    |
| 0.106412   | noncoding |
| 1          | coding    |
| 0.453516   | noncoding |
| 0.573036   | coding    |
| 1          | coding    |
| 0.0616994  | noncoding |
| 1          | coding    |
| 0.132682   | noncoding |
| 0.493552   | noncoding |
| 0.670915   | coding    |
| 0.996955   | coding    |
| 0.999242   | coding    |
| 0.956028   | coding    |
| 0.987997   | coding    |
| 0.993837   | coding    |
| 0.0292061  | noncoding |
| 0.057616   | noncoding |
| 0.00559014 | noncoding |
| 0.501968   | coding    |
| 0.148198   | noncoding |
| 0.25405    | noncoding |
| 0.114684   | noncoding |
| 0.161757   | noncoding |
| 0.492775   | noncoding |
| 0.183564   | noncoding |
| 0.933961   | coding    |
| 0.629843   | coding    |
| 0.0781764  | noncoding |
| 0.993911   | coding    |
| 0.997868   | coding    |
| 0.0624703  | noncoding |
| 0.0186333  | noncoding |
| 0.00964159 | noncoding |

|            |           |
|------------|-----------|
| 0.36897    | noncoding |
| 0.941335   | coding    |
| 0.0302099  | noncoding |
| 0.00902809 | noncoding |
| 1          | coding    |
| 1          | coding    |
| 0.0313756  | noncoding |
| 0.0625129  | noncoding |
| 0.412263   | noncoding |
| 0.0846986  | noncoding |
| 0.0659905  | noncoding |
| 0.00512148 | noncoding |
| 0.535136   | coding    |
| 1          | coding    |
| 0.00879398 | noncoding |
| 0.00993816 | noncoding |
| 0.916447   | coding    |
| 0.135661   | noncoding |
| 0.0390999  | noncoding |
| 0.311711   | noncoding |
| 0.329553   | noncoding |
| 0.410311   | noncoding |
| 1          | coding    |
| 0.0150543  | noncoding |
| 1          | coding    |
| 0.557863   | coding    |
| 0.999998   | coding    |
| 1          | coding    |
| 0.269367   | noncoding |
| 1          | coding    |
| 0.0833807  | noncoding |
| 1          | coding    |
| 1          | coding    |
| 0.0381518  | noncoding |
| 0.0355215  | noncoding |
| 0.846224   | coding    |
| 0.0075228  | noncoding |
| 0.980369   | coding    |
| 0.995394   | coding    |
| 0.893886   | coding    |
| 1          | coding    |
| 1          | coding    |

|           |           |
|-----------|-----------|
| 0.385213  | noncoding |
| 0.0239084 | noncoding |
| 1         | coding    |
| 0.624159  | coding    |
| 0.139369  | noncoding |
| 0.0269646 | noncoding |
| 1         | coding    |
| 0.204102  | noncoding |
| 0.180969  | noncoding |
| 0.241265  | noncoding |
| 1         | coding    |
| 0.999996  | coding    |
| 1         | coding    |
| 1         | coding    |
| 0.999999  | coding    |
| 0.981     | coding    |
| 0.998077  | coding    |
| 1         | coding    |
| 1         | coding    |
| 0.0652463 | noncoding |
| 0.648209  | coding    |
| 0.999816  | coding    |
| 0.0979879 | noncoding |
| 0.867505  | coding    |
| 0.99827   | coding    |
| 0.762781  | coding    |
| 0.860039  | coding    |
| 0.762781  | coding    |
| 0.108186  | noncoding |
| 1         | coding    |
| 0.876917  | coding    |
| 0.997591  | coding    |



|           |           |
|-----------|-----------|
| 1         | coding    |
| 0.0187031 | noncoding |
| 1         | coding    |
| 1         | coding    |
| 1         | coding    |
| 0.0819205 | noncoding |
| 1         | coding    |
| 1         | coding    |
| 1         | coding    |
| 0.0751741 | noncoding |
| 0.211012  | noncoding |
| 1         | coding    |
| 1         | coding    |
| 1         | coding    |
| 0.0938247 | noncoding |
| 0.55766   | coding    |
| 0.99993   | coding    |
| 0.99999   | coding    |
| 0.999981  | coding    |
| 0.708744  | coding    |
| 1         | coding    |
| 1         | coding    |
| 1         | coding    |
| 0.152957  | noncoding |
| 0.132291  | noncoding |
| 0.325751  | noncoding |
| 1         | coding    |
| 0.737725  | coding    |
| 1         | coding    |
| 0.849144  | coding    |
| 0.999466  | coding    |
| 0.998963  | coding    |
| 1         | coding    |
| 0.977641  | coding    |
| 1         | coding    |
| 0.449419  | noncoding |
| 0.967609  | coding    |
| 0.565619  | coding    |
| 0.475071  | noncoding |
| 1         | coding    |
| 0.906427  | coding    |
| 0.999938  | coding    |
| 0.999988  | coding    |
| 0.0086404 | noncoding |

|           |           |
|-----------|-----------|
| 0.999983  | coding    |
| 0.952929  | coding    |
| 1         | coding    |
| 0.0422661 | noncoding |
| 0.999401  | coding    |
| 0.999419  | coding    |
| 0.999345  | coding    |
| 0.0869851 | noncoding |
| 0.39865   | noncoding |
| 0.049443  | noncoding |
| 0.986626  | coding    |
| 0.987538  | coding    |
| 0.143507  | noncoding |
| 0.99243   | coding    |
| 0.135726  | noncoding |
| 1         | coding    |
| 0.999998  | coding    |
| 1         | coding    |
| 0.999999  | coding    |
| 1         | coding    |
| 0.264564  | noncoding |
| 0.999916  | coding    |
| 1         | coding    |
| 0.995965  | coding    |
| 0.170943  | noncoding |
| 0.996329  | coding    |
| 0.471759  | noncoding |
| 0.941566  | coding    |
| 0.997657  | coding    |
| 0.0647297 | noncoding |
| 0.988212  | coding    |
| 0.0089232 | noncoding |
| 0.967776  | coding    |
| 0.999838  | coding    |
| 0.0299305 | noncoding |
| 0.0361415 | noncoding |
| 0.0499542 | noncoding |
| 1         | coding    |
| 0.643619  | coding    |
| 0.973653  | coding    |

|            |           |
|------------|-----------|
| 0.125572   | noncoding |
| 0.0683417  | noncoding |
| 0.0303234  | noncoding |
| 0.786217   | coding    |
| 0.0211986  | noncoding |
| 0.999932   | coding    |
| 1          | coding    |
| 0.507893   | coding    |
| 1          | coding    |
| 0.707499   | coding    |
| 0.999996   | coding    |
| 1          | coding    |
| 1          | coding    |
| 1          | coding    |
| 0.0604417  | noncoding |
| 0.772015   | coding    |
| 0.0477601  | noncoding |
| 0.299558   | noncoding |
| 0.0197345  | noncoding |
| 0.993336   | coding    |
| 0.999947   | coding    |
| 0.999791   | coding    |
| 0.999847   | coding    |
| 0.183558   | noncoding |
| 0.0419324  | noncoding |
| 0.182824   | noncoding |
| 0.999786   | coding    |
| 0.00827217 | noncoding |
| 0.00786888 | noncoding |
| 0.0519224  | noncoding |
| 0.0177285  | noncoding |
| 0.379983   | noncoding |
| 1          | coding    |
| 0.101226   | noncoding |
| 0.999999   | coding    |
| 1          | coding    |
| 0.0916308  | noncoding |
| 1          | coding    |
| 1          | coding    |
| 1          | coding    |
| 0.999813   | coding    |
| 1          | coding    |
| 0.721081   | coding    |
| 1          | coding    |
| 0.999991   | coding    |
| 1          | coding    |
| 0.918171   | coding    |
| 1          | coding    |
| 0.0219923  | noncoding |
| 0.339286   | noncoding |
| 1          | coding    |

|            |           |
|------------|-----------|
| 1          | coding    |
| 0.0868504  | noncoding |
| 1          | coding    |
| 0.401667   | noncoding |
| 0.999294   | coding    |
| 1          | coding    |
| 0.999845   | coding    |
| 1          | coding    |
| 1          | coding    |
| 0.0703054  | noncoding |
| 0.235874   | noncoding |
| 0.504896   | coding    |
| 1          | coding    |
| 0.152798   | noncoding |
| 1          | coding    |
| 0.136135   | noncoding |
| 0.122235   | noncoding |
| 0.0397034  | noncoding |
| 0.19746    | noncoding |
| 0.278652   | noncoding |
| 1          | coding    |
| 0.999993   | coding    |
| 0.0570968  | noncoding |
| 0.999999   | coding    |
| 1          | coding    |
| 0.155053   | noncoding |
| 0.0180425  | noncoding |
| 0.156639   | noncoding |
| 0.0196239  | noncoding |
| 0.170096   | noncoding |
| 0.0900071  | noncoding |
| 0.122595   | noncoding |
| 0.0149736  | noncoding |
| 0.00857535 | noncoding |
| 0.0113457  | noncoding |
| 0.00881641 | noncoding |
| 0.010984   | noncoding |
| 0.0100814  | noncoding |

|            |           |
|------------|-----------|
| 0.00857535 | noncoding |
| 0.00866158 | noncoding |
| 0.00803472 | noncoding |
| 0.0113817  | noncoding |
| 0.00857959 | noncoding |
| 0.0105921  | noncoding |
| 0.0236911  | noncoding |
| 0.00857867 | noncoding |
| 0.00857759 | noncoding |
| 0.00824982 | noncoding |
| 0.00887473 | noncoding |
| 0.00857867 | noncoding |
| 0.00939423 | noncoding |
| 0.00891073 | noncoding |
| 0.0108051  | noncoding |
| 0.0116338  | noncoding |
| 0.00873614 | noncoding |
| 0.00857535 | noncoding |
| 0.0108051  | noncoding |
| 0.149023   | noncoding |
| 0.997836   | coding    |
| 1          | coding    |
| 1          | coding    |
| 0.0237748  | noncoding |
| 1          | coding    |
| 0.999999   | coding    |
| 0.0323961  | noncoding |
| 0.999998   | coding    |
| 0.999998   | coding    |
| 0.97756    | coding    |
| 0.504534   | coding    |
| 0.0759876  | noncoding |
| 0.039337   | noncoding |
| 0.106925   | noncoding |
| 0.0127795  | noncoding |
| 0.0826597  | noncoding |
| 0.0197523  | noncoding |
| 0.0219365  | noncoding |
| 0.0703732  | noncoding |
| 0.522855   | coding    |
| 1          | coding    |
| 1          | coding    |
| 1          | coding    |
| 0.0473657  | noncoding |
| 0.0274482  | noncoding |
| 1          | coding    |
| 0.992351   | coding    |
| 1          | coding    |
| 0.999884   | coding    |
| 0.71582    | coding    |
| 0.135381   | noncoding |

|            |           |
|------------|-----------|
| 0.39033    | noncoding |
| 0.00873216 | noncoding |
| 0.999995   | coding    |
| 0.0187454  | noncoding |
| 0.0734206  | noncoding |
| 0.280687   | noncoding |
| 0.18672    | noncoding |
| 0.898354   | coding    |
| 0.0624925  | noncoding |
| 0.0377257  | noncoding |
| 0.0545984  | noncoding |
| 0.456952   | noncoding |
| 0.753091   | coding    |
| 0.269258   | noncoding |
| 1          | coding    |
| 0.0915483  | noncoding |
| 1          | coding    |
| 0.0353112  | noncoding |
| 0.636385   | coding    |
| 0.0408787  | noncoding |
| 0.0282654  | noncoding |
| 1          | coding    |
| 0.090836   | noncoding |
| 0.0315018  | noncoding |
| 1          | coding    |
| 0.00571301 | noncoding |
| 0.999992   | coding    |
| 0.999971   | coding    |
| 0.490204   | noncoding |
| 1          | coding    |
| 1          | coding    |
| 0.0446396  | noncoding |
| 1          | coding    |
| 0.998724   | coding    |
| 0.347703   | noncoding |
| 0.0714847  | noncoding |
| 0.114456   | noncoding |
| 0.0656274  | noncoding |
| 0.0274783  | noncoding |
| 0.997191   | coding    |
| 0.999911   | coding    |
| 1          | coding    |
| 0.116037   | noncoding |
| 0.463277   | noncoding |

|            |           |
|------------|-----------|
| 0.320471   | noncoding |
| 0.999988   | coding    |
| 0.985222   | coding    |
| 0.0071554  | noncoding |
| 1          | coding    |
| 0.0461315  | noncoding |
| 0.967637   | coding    |
| 0.343923   | noncoding |
| 1          | coding    |
| 1          | coding    |
| 1          | coding    |
| 0.152267   | noncoding |
| 1          | coding    |
| 1          | coding    |
| 0.00384177 | noncoding |
| 0.995341   | coding    |
| 0.751607   | coding    |
| 0.0348579  | noncoding |
| 0.964903   | coding    |
| 0.935083   | coding    |
| 0.212768   | noncoding |
| 0.230644   | noncoding |
| 0.232703   | noncoding |
| 0.361347   | noncoding |
| 0.365439   | noncoding |
| 0.149083   | noncoding |
| 0.00457736 | noncoding |
| 0.0113366  | noncoding |
| 0.999848   | coding    |
| 0.999977   | coding    |
| 0.999908   | coding    |
| 0.999922   | coding    |
| 0.999994   | coding    |
| 1          | coding    |
| 1          | coding    |
| 0.999977   | coding    |
| 1          | coding    |
| 0.0539297  | noncoding |
| 0.0846237  | noncoding |
| 0.999999   | coding    |
| 0.792861   | coding    |
| 1          | coding    |
| 0.999617   | coding    |
| 0.999558   | coding    |
| 1          | coding    |
| 1          | coding    |
| 0.131579   | noncoding |
| 0.0578663  | noncoding |
| 0.0281482  | noncoding |
| 0.047038   | noncoding |
| 0.0944581  | noncoding |
| 0.70392    | coding    |
| 0.999727   | coding    |
| 0.808019   | coding    |

|           |           |
|-----------|-----------|
| 1         | coding    |
| 1         | coding    |
| 0.999864  | coding    |
| 0.0122423 | noncoding |
| 0.106286  | noncoding |
| 0.998458  | coding    |
| 0.518386  | coding    |
| 0.0222072 | noncoding |
| 0.999991  | coding    |
| 0.999984  | coding    |
| 0.40403   | noncoding |
| 0.0297302 | noncoding |
| 0.02094   | noncoding |
| 0.297528  | noncoding |
| 0.0192313 | noncoding |
| 0.0231808 | noncoding |
| 0.160543  | noncoding |
| 0.420028  | noncoding |
| 0.0320479 | noncoding |
| 0.492632  | noncoding |
| 0.999216  | coding    |
| 0.99792   | coding    |
| 0.9992    | coding    |
| 0.99518   | coding    |
| 0.811341  | coding    |
| 1         | coding    |
| 0.979886  | coding    |
| 0.23597   | noncoding |
| 1         | coding    |
| 0.0341811 | noncoding |
| 0.0971136 | noncoding |
| 1         | coding    |
| 0.476296  | noncoding |
| 1         | coding    |
| 0.855406  | coding    |
| 0.0231603 | noncoding |
| 0.279443  | noncoding |
| 0.0176463 | noncoding |
| 0.0472982 | noncoding |
| 0.116902  | noncoding |
| 0.0804407 | noncoding |
| 0.0723534 | noncoding |
| 0.0269495 | noncoding |
| 0.0568271 | noncoding |
| 0.966839  | coding    |
| 0.141537  | noncoding |
| 0.999726  | coding    |



|            |           |
|------------|-----------|
| 0.999989   | coding    |
| 0.999726   | coding    |
| 0.999813   | coding    |
| 0.151618   | noncoding |
| 0.0190466  | noncoding |
| 0.310316   | noncoding |
| 0.560425   | coding    |
| 0.1531     | noncoding |
| 1          | coding    |
| 0.047443   | noncoding |
| 0.0139063  | noncoding |
| 0.997941   | coding    |
| 0.059798   | noncoding |
| 0.117263   | noncoding |
| 0.0674166  | noncoding |
| 0.0573882  | noncoding |
| 0.202297   | noncoding |
| 0.349214   | noncoding |
| 0.0996563  | noncoding |
| 1          | coding    |
| 0.99899    | coding    |
| 0.485571   | noncoding |
| 0.297495   | noncoding |
| 1          | coding    |
| 1          | coding    |
| 0.00546452 | noncoding |
| 0.0154026  | noncoding |
| 1          | coding    |
| 0.999915   | coding    |
| 0.999996   | coding    |
| 0.999808   | coding    |
| 0.995015   | coding    |
| 0.157346   | noncoding |
| 0.446944   | noncoding |
| 1          | coding    |
| 0.00938452 | noncoding |
| 0.152056   | noncoding |
| 0.008334   | noncoding |
| 1          | coding    |
| 1          | coding    |
| 1          | coding    |
| 0.0446391  | noncoding |
| 1          | coding    |

|            |           |
|------------|-----------|
| 1          | coding    |
| 0.0197776  | noncoding |
| 0.00841495 | noncoding |
| 0.0309941  | noncoding |
| 0.992862   | coding    |
| 0.999951   | coding    |
| 0.999956   | coding    |
| 0.019643   | noncoding |
| 0.104831   | noncoding |
| 0.0192124  | noncoding |
| 0.337054   | noncoding |
| 0.999925   | coding    |
| 0.535833   | coding    |
| 0.253214   | noncoding |
| 0.142965   | noncoding |
| 0.164367   | noncoding |
| 0.0596481  | noncoding |
| 0.0964732  | noncoding |
| 0.0128521  | noncoding |
| 0.0119489  | noncoding |
| 1          | coding    |
| 1          | coding    |
| 0.152774   | noncoding |
| 0.978121   | coding    |
| 0.0729842  | noncoding |
| 1          | coding    |
| 0.997862   | coding    |
| 0.044554   | noncoding |
| 0.998996   | coding    |
| 1          | coding    |
| 0.987728   | coding    |
| 0.999951   | coding    |
| 0.999851   | coding    |
| 1          | coding    |
| 0.999998   | coding    |
| 0.0218861  | noncoding |
| 0.0250719  | noncoding |
| 0.999575   | coding    |
| 1          | coding    |
| 0.191616   | noncoding |
| 0.0186359  | noncoding |
| 0.0141734  | noncoding |
| 0.0105947  | noncoding |
| 1          | coding    |

|           |           |
|-----------|-----------|
| 0.435636  | noncoding |
| 1         | coding    |
| 1         | coding    |
| 0.999992  | coding    |
| 0.887995  | coding    |
| 0.938439  | coding    |
| 0.887995  | coding    |
| 1         | coding    |
| 1         | coding    |
| 0.0887312 | noncoding |
| 0.999867  | coding    |
| 0.999823  | coding    |
| 0.142292  | noncoding |
| 0.142292  | noncoding |
| 0.97973   | coding    |
| 0.798167  | coding    |
| 0.747913  | coding    |
| 0.998428  | coding    |
| 0.9996    | coding    |
| 0.999999  | coding    |
| 0.999998  | coding    |
| 0.999961  | coding    |
| 0.074532  | noncoding |
| 0.182042  | noncoding |
| 0.0286299 | noncoding |
| 0.54871   | coding    |
| 0.0409591 | noncoding |
| 0.139817  | noncoding |
| 1         | coding    |
| 0.057824  | noncoding |
| 1         | coding    |
| 0.215176  | noncoding |
| 1         | coding    |
| 0.0336573 | noncoding |
| 1         | coding    |
| 1         | coding    |
| 0.0898466 | noncoding |
| 0.0164438 | noncoding |
| 0.0556835 | noncoding |
| 0.179153  | noncoding |
| 0.427156  | noncoding |
| 0.0771786 | noncoding |
| 0.0461518 | noncoding |
| 0.223292  | noncoding |
| 0.0818069 | noncoding |
| 0.187186  | noncoding |
| 0.568646  | coding    |
| 0.0368316 | noncoding |
| 0.0317262 | noncoding |
| 0.416591  | noncoding |

|           |           |
|-----------|-----------|
| 0.0240432 | noncoding |
| 0.024429  | noncoding |
| 0.68359   | coding    |
| 0.1303    | noncoding |
| 0.0750378 | noncoding |
| 0.105927  | noncoding |
| 0.333984  | noncoding |
| 0.170559  | noncoding |
| 0.999992  | coding    |
| 0.976968  | coding    |
| 0.943361  | coding    |
| 0.0121729 | noncoding |
| 1         | coding    |
| 0.0602111 | noncoding |
| 0.668648  | coding    |
| 0.0710404 | noncoding |
| 0.937508  | coding    |
| 0.0655871 | noncoding |
| 1         | coding    |
| 0.999983  | coding    |
| 1         | coding    |
| 1         | coding    |
| 0.790133  | coding    |
| 0.0468222 | noncoding |
| 1         | coding    |
| 0.999999  | coding    |
| 1         | coding    |
| 1         | coding    |
| 0.0547512 | noncoding |
| 1         | coding    |
| 1         | coding    |
| 1         | coding    |
| 0.0982026 | noncoding |
| 1         | coding    |
| 0.999999  | coding    |
| 1         | coding    |
| 1         | coding    |
| 0.0291204 | noncoding |
| 1         | coding    |
| 1         | coding    |
| 0.666352  | coding    |

|           |           |
|-----------|-----------|
| 0.248423  | noncoding |
| 0.966955  | coding    |
| 0.059863  | noncoding |
| 0.450477  | noncoding |
| 1         | coding    |
| 1         | coding    |
| 0.438351  | noncoding |
| 1         | coding    |
| 1         | coding    |
| 0.999922  | coding    |
| 0.999996  | coding    |
| 0.0204073 | noncoding |
| 0.78967   | coding    |
| 0.999996  | coding    |
| 1         | coding    |
| 1         | coding    |
| 0.996846  | coding    |
| 0.98585   | coding    |
| 0.998207  | coding    |
| 0.997466  | coding    |
| 1         | coding    |
| 0.0269894 | noncoding |
| 0.0459009 | noncoding |
| 0.0493441 | noncoding |
| 0.996734  | coding    |
| 0.148277  | noncoding |
| 0.306988  | noncoding |
| 0.549477  | coding    |
| 0.0911941 | noncoding |
| 0.999722  | coding    |
| 0.999982  | coding    |
| 0.0132113 | noncoding |
| 0.175545  | noncoding |
| 1         | coding    |
| 1         | coding    |
| 0.999999  | coding    |
| 0.999999  | coding    |
| 1         | coding    |
| 0.999999  | coding    |
| 0.068326  | noncoding |
| 0.411     | noncoding |
| 0.102715  | noncoding |
| 0.992376  | coding    |
| 0.993325  | coding    |
| 0.942878  | coding    |
| 0.993325  | coding    |
| 1         | coding    |

|            |           |
|------------|-----------|
| 1          | coding    |
| 1          | coding    |
| 0.999332   | coding    |
| 0.999215   | coding    |
| 0.957448   | coding    |
| 0.998963   | coding    |
| 0.0404563  | noncoding |
| 0.984095   | coding    |
| 0.999991   | coding    |
| 1          | coding    |
| 0.0447972  | noncoding |
| 0.025215   | noncoding |
| 0.00819083 | noncoding |
| 1          | coding    |
| 0.305297   | noncoding |
| 0.374962   | noncoding |
| 1          | coding    |
| 0.0151027  | noncoding |
| 0.445438   | noncoding |
| 0.00716122 | noncoding |
| 0.0401548  | noncoding |
| 0.0265615  | noncoding |
| 1          | coding    |
| 0.212013   | noncoding |
| 0.00545454 | noncoding |
| 0.028165   | noncoding |
| 0.0271502  | noncoding |
| 1          | coding    |
| 0.0388222  | noncoding |
| 0.179602   | noncoding |
| 0.1442     | noncoding |
| 0.442208   | noncoding |
| 0.413227   | noncoding |
| 0.492752   | noncoding |
| 0.669455   | coding    |
| 0.707986   | coding    |
| 0.669455   | coding    |
| 0.154424   | noncoding |
| 1          | coding    |
| 1          | coding    |
| 1          | coding    |
| 0.999996   | coding    |
| 1          | coding    |
| 0.0655065  | noncoding |

|           |           |
|-----------|-----------|
| 1         | coding    |
| 0.999998  | coding    |
| 0.231692  | noncoding |
| 0.0838297 | noncoding |
| 0.999997  | coding    |
| 0.635543  | coding    |
| 0.999985  | coding    |
| 1         | coding    |
| 1         | coding    |
| 1         | coding    |
| 0.156819  | noncoding |
| 1         | coding    |
| 0.0509499 | noncoding |
| 0.527294  | coding    |
| 0.337238  | noncoding |
| 0.0553146 | noncoding |
| 0.0875964 | noncoding |
| 0.452643  | noncoding |
| 0.20403   | noncoding |
| 0.0255573 | noncoding |
| 0.0220735 | noncoding |
| 0.021205  | noncoding |
| 0.338691  | noncoding |
| 1         | coding    |
| 0.129348  | noncoding |
| 0.203145  | noncoding |
| 0.215931  | noncoding |
| 0.377291  | noncoding |
| 0.46603   | noncoding |
| 0.108955  | noncoding |
| 1         | coding    |
| 1         | coding    |
| 0.704612  | coding    |
| 0.9406    | coding    |
| 0.695096  | coding    |
| 0.200022  | noncoding |
| 0.0978381 | noncoding |
| 0.404946  | noncoding |
| 1         | coding    |
| 0.266286  | noncoding |
| 0.998893  | coding    |
| 1         | coding    |
| 0.998893  | coding    |
| 0.163499  | noncoding |

|           |           |
|-----------|-----------|
| 0.207962  | noncoding |
| 0.0874289 | noncoding |
| 0.0513791 | noncoding |
| 0.0589178 | noncoding |
| 1         | coding    |
| 1         | coding    |
| 0.993783  | coding    |
| 0.362238  | noncoding |
| 0.526728  | coding    |
| 0.0355956 | noncoding |
| 1         | coding    |
| 1         | coding    |
| 1         | coding    |
| 0.0401796 | noncoding |
| 0.920208  | coding    |
| 0.999798  | coding    |
| 0.296411  | noncoding |
| 0.999999  | coding    |
| 1         | coding    |
| 0.999407  | coding    |
| 0.999355  | coding    |
| 0.743957  | coding    |
| 0.020457  | noncoding |
| 1         | coding    |
| 0.0167472 | noncoding |
| 1         | coding    |
| 1         | coding    |
| 1         | coding    |
| 0.999984  | coding    |
| 1         | coding    |
| 0.111192  | noncoding |
| 0.169478  | noncoding |
| 0.0431288 | noncoding |
| 0.999481  | coding    |
| 1         | coding    |
| 1         | coding    |
| 1         | coding    |
| 0.999916  | coding    |
| 0.945979  | coding    |
| 0.975044  | coding    |
| 0.633764  | coding    |
| 0.945738  | coding    |
| 0.99951   | coding    |
| 1         | coding    |
| 0.291397  | noncoding |



|           |           |
|-----------|-----------|
| 0.699417  | coding    |
| 0.0298403 | noncoding |
| 0.301188  | noncoding |
| 0.0827958 | noncoding |
| 0.142599  | noncoding |
| 0.100432  | noncoding |
| 0.100432  | noncoding |
| 0.141975  | noncoding |
| 0.332814  | noncoding |
| 0.171707  | noncoding |
| 0.0123513 | noncoding |
| 0.999999  | coding    |
| 0.999999  | coding    |
| 0.123806  | noncoding |
| 0.245998  | noncoding |
| 0.999999  | coding    |
| 1         | coding    |
| 0.0124431 | noncoding |
| 0.0201621 | noncoding |
| 0.0483313 | noncoding |
| 0.999997  | coding    |
| 0.954797  | coding    |
| 0.999778  | coding    |
| 1         | coding    |
| 0.0202487 | noncoding |
| 0.0311133 | noncoding |
| 0.866134  | coding    |
| 0.0636675 | noncoding |
| 0.020199  | noncoding |
| 0.195651  | noncoding |
| 0.998889  | coding    |
| 0.0698601 | noncoding |
| 1         | coding    |
| 0.0256519 | noncoding |
| 0.999999  | coding    |
| 0.500241  | coding    |
| 0.144882  | noncoding |
| 0.999935  | coding    |
| 1         | coding    |
| 1         | coding    |
| 1         | coding    |
| 0.0888371 | noncoding |
| 0.999977  | coding    |
| 0.994262  | coding    |
| 0.295637  | noncoding |
| 0.277988  | noncoding |
| 0.177069  | noncoding |
| 0.991978  | coding    |
| 0.128666  | noncoding |
| 0.36076   | noncoding |

|            |           |
|------------|-----------|
| 0.181162   | noncoding |
| 0.0229826  | noncoding |
| 0.0180674  | noncoding |
| 0.107787   | noncoding |
| 0.169797   | noncoding |
| 1          | coding    |
| 0.937374   | coding    |
| 1          | coding    |
| 1          | coding    |
| 1          | coding    |
| 0.086054   | noncoding |
| 0.0476048  | noncoding |
| 1          | coding    |
| 0.0297362  | noncoding |
| 0.999999   | coding    |
| 1          | coding    |
| 0.052112   | noncoding |
| 0.0754697  | noncoding |
| 0.100416   | noncoding |
| 0.999819   | coding    |
| 0.32747    | noncoding |
| 0.0277373  | noncoding |
| 0.999605   | coding    |
| 0.999899   | coding    |
| 1          | coding    |
| 0.00361771 | noncoding |
| 1          | coding    |
| 0.0577705  | noncoding |
| 1          | coding    |
| 0.0422086  | noncoding |
| 0.0121496  | noncoding |
| 0.010881   | noncoding |
| 0.212379   | noncoding |
| 0.424066   | noncoding |
| 1          | coding    |
| 0.999953   | coding    |
| 0.888717   | coding    |
| 0.636152   | coding    |
| 0.743663   | coding    |
| 0.999999   | coding    |
| 0.0107305  | noncoding |
| 0.800475   | coding    |
| 1          | coding    |
| 1          | coding    |
| 0.0389823  | noncoding |
| 1          | coding    |
| 0.0101849  | noncoding |

|            |           |
|------------|-----------|
| 0.0322617  | noncoding |
| 0.0568785  | noncoding |
| 0.208027   | noncoding |
| 1          | coding    |
| 1          | coding    |
| 0.134337   | noncoding |
| 1          | coding    |
| 0.976692   | coding    |
| 1          | coding    |
| 1          | coding    |
| 1          | coding    |
| 0.267817   | noncoding |
| 0.968995   | coding    |
| 0.90808    | coding    |
| 1          | coding    |
| 0.999939   | coding    |
| 1          | coding    |
| 0.967128   | coding    |
| 0.997979   | coding    |
| 0.614716   | coding    |
| 0.621936   | coding    |
| 0.178454   | noncoding |
| 0.968284   | coding    |
| 0.950366   | coding    |
| 0.944339   | coding    |
| 0.94008    | coding    |
| 1          | coding    |
| 0.0247419  | noncoding |
| 0.191395   | noncoding |
| 0.301491   | noncoding |
| 0.00449426 | noncoding |
| 1          | coding    |
| 0.999929   | coding    |
| 1          | coding    |
| 1          | coding    |
| 1          | coding    |
| 0.156511   | noncoding |
| 0.0501693  | noncoding |
| 0.0215633  | noncoding |
| 0.0952544  | noncoding |
| 0.00898571 | noncoding |
| 0.0408699  | noncoding |
| 0.179242   | noncoding |
| 1          | coding    |
| 1          | coding    |
| 0.202209   | noncoding |
| 0.37602    | noncoding |
| 0.626497   | coding    |
| 0.999792   | coding    |
| 0.987966   | coding    |
| 0.0359242  | noncoding |

|           |           |
|-----------|-----------|
| 0.0833277 | noncoding |
| 1         | coding    |
| 0.992763  | coding    |
| 1         | coding    |
| 0.139528  | noncoding |
| 0.136599  | noncoding |
| 0.105943  | noncoding |
| 0.561395  | coding    |
| 1         | coding    |
| 0.995811  | coding    |
| 0.999821  | coding    |
| 0.194491  | noncoding |
| 0.121436  | noncoding |
| 0.0823735 | noncoding |
| 1         | coding    |
| 0.027648  | noncoding |
| 0.972596  | coding    |
| 0.612754  | coding    |
| 0.487511  | noncoding |
| 0.500377  | coding    |
| 0.114039  | noncoding |
| 0.0342311 | noncoding |
| 0.0364641 | noncoding |
| 0.954053  | coding    |
| 0.0545844 | noncoding |
| 0.301796  | noncoding |
| 1         | coding    |
| 1         | coding    |
| 0.143549  | noncoding |
| 0.0159137 | noncoding |
| 0.989859  | coding    |
| 0.0244226 | noncoding |
| 0.888593  | coding    |
| 0.988944  | coding    |
| 0.982668  | coding    |
| 0.362038  | noncoding |
| 0.239667  | noncoding |
| 0.969626  | coding    |
| 0.973033  | coding    |
| 0.947328  | coding    |
| 0.9898    | coding    |
| 0.457515  | noncoding |
| 0.144632  | noncoding |

|            |           |
|------------|-----------|
| 1          | coding    |
| 0.157419   | noncoding |
| 0.117756   | noncoding |
| 0.0234074  | noncoding |
| 1          | coding    |
| 0.999455   | coding    |
| 0.999999   | coding    |
| 0.999999   | coding    |
| 0.0847566  | noncoding |
| 1          | coding    |
| 0.185299   | noncoding |
| 0.133183   | noncoding |
| 0.202269   | noncoding |
| 0.964783   | coding    |
| 0.0248312  | noncoding |
| 1          | coding    |
| 0.0212535  | noncoding |
| 0.992616   | coding    |
| 0.999996   | coding    |
| 1          | coding    |
| 0.112285   | noncoding |
| 1          | coding    |
| 0.999954   | coding    |
| 0.896193   | coding    |
| 0.215174   | noncoding |
| 0.223392   | noncoding |
| 0.148066   | noncoding |
| 1          | coding    |
| 0.877763   | coding    |
| 0.0518583  | noncoding |
| 0.0730935  | noncoding |
| 0.280134   | noncoding |
| 1          | coding    |
| 0.999999   | coding    |
| 1          | coding    |
| 0.121361   | noncoding |
| 0.0266139  | noncoding |
| 0.238161   | noncoding |
| 0.0597985  | noncoding |
| 0.0321035  | noncoding |
| 0.14963    | noncoding |
| 1          | coding    |
| 0.0568252  | noncoding |
| 0.0515394  | noncoding |
| 0.105839   | noncoding |
| 0.149643   | noncoding |
| 0.455308   | noncoding |
| 0.00567969 | noncoding |
| 0.00526099 | noncoding |
| 0.992021   | coding    |
| 1          | coding    |
| 1          | coding    |
| 0.999985   | coding    |
| 0.596834   | coding    |

|            |           |
|------------|-----------|
| 1          | coding    |
| 0.319384   | noncoding |
| 0.0725072  | noncoding |
| 0.998256   | coding    |
| 0.0521647  | noncoding |
| 0.040723   | noncoding |
| 0.999995   | coding    |
| 0.851234   | coding    |
| 1          | coding    |
| 0.572954   | coding    |
| 0.0508658  | noncoding |
| 0.061246   | noncoding |
| 0.0158126  | noncoding |
| 1          | coding    |
| 0.510481   | coding    |
| 0.974246   | coding    |
| 0.973904   | coding    |
| 0.0446463  | noncoding |
| 0.0414379  | noncoding |
| 0.0119052  | noncoding |
| 0.999713   | coding    |
| 0.999982   | coding    |
| 0.293679   | noncoding |
| 0.242686   | noncoding |
| 0.00782959 | noncoding |
| 1          | coding    |
| 1          | coding    |
| 0.13471    | noncoding |
| 0.0252757  | noncoding |
| 0.989788   | coding    |
| 1          | coding    |
| 1          | coding    |
| 0.0398195  | noncoding |
| 0.185871   | noncoding |
| 0.477505   | noncoding |
| 0.563981   | coding    |
| 1          | coding    |
| 0.999999   | coding    |
| 0.135362   | noncoding |
| 0.999989   | coding    |
| 1          | coding    |
| 0.999541   | coding    |
| 0.0498323  | noncoding |
| 0.305617   | noncoding |
| 0.24074    | noncoding |
| 1          | coding    |
| 0.999838   | coding    |

|           |           |
|-----------|-----------|
| 0.999704  | coding    |
| 0.0554978 | noncoding |
| 0.99986   | coding    |
| 0.999999  | coding    |
| 0.0768732 | noncoding |
| 1         | coding    |
| 0.0402827 | noncoding |
| 0.0348131 | noncoding |
| 0.161166  | noncoding |
| 1         | coding    |
| 0.983909  | coding    |
| 0.215046  | noncoding |
| 0.119751  | noncoding |
| 0.312029  | noncoding |
| 0.108953  | noncoding |
| 0.383998  | noncoding |
| 0.0682499 | noncoding |
| 0.999993  | coding    |
| 0.030323  | noncoding |
| 0.998841  | coding    |
| 0.071227  | noncoding |
| 0.299957  | noncoding |
| 0.0414246 | noncoding |
| 0.98786   | coding    |
| 0.712122  | coding    |
| 0.246779  | noncoding |
| 0.0255887 | noncoding |
| 0.299811  | noncoding |
| 1         | coding    |
| 0.380303  | noncoding |
| 1         | coding    |
| 0.0205576 | noncoding |
| 1         | coding    |
| 0.928268  | coding    |
| 1         | coding    |
| 1         | coding    |
| 0.0619941 | noncoding |
| 0.201533  | noncoding |
| 1         | coding    |
| 0.135083  | noncoding |
| 0.478339  | noncoding |
| 0.102018  | noncoding |
| 0.0351912 | noncoding |
| 1         | coding    |
| 1         | coding    |

|           |           |
|-----------|-----------|
| 1         | coding    |
| 0.0914977 | noncoding |
| 0.0875148 | noncoding |
| 0.177305  | noncoding |
| 0.962565  | coding    |
| 0.117302  | noncoding |
| 0.117819  | noncoding |
| 0.0699604 | noncoding |
| 0.0491513 | noncoding |
| 0.217171  | noncoding |
| 0.0840535 | noncoding |
| 0.577386  | coding    |
| 0.0293334 | noncoding |
| 0.834086  | coding    |
| 0.0471375 | noncoding |
| 1         | coding    |
| 0.99519   | coding    |
| 0.959374  | coding    |
| 0.993235  | coding    |
| 1         | coding    |
| 0.999303  | coding    |
| 0.0165795 | noncoding |
| 0.385086  | noncoding |
| 0.973113  | coding    |
| 1         | coding    |
| 0.995375  | coding    |
| 0.998845  | coding    |
| 0.986252  | coding    |
| 1         | coding    |
| 0.999999  | coding    |
| 0.988558  | coding    |
| 1         | coding    |
| 1         | coding    |
| 0.999751  | coding    |
| 0.368031  | noncoding |
| 0.841162  | coding    |
| 1         | coding    |
| 1         | coding    |
| 1         | coding    |
| 0.117172  | noncoding |
| 0.0233437 | noncoding |
| 1         | coding    |
| 0.994255  | coding    |
| 0.908894  | coding    |
| 0.996487  | coding    |
| 0.895499  | coding    |
| 0.204884  | noncoding |
| 0.98358   | coding    |
| 0.112337  | noncoding |
| 0.0530906 | noncoding |
| 1         | coding    |
| 1         | coding    |
| 1         | coding    |
| 0.999981  | coding    |



|           |           |
|-----------|-----------|
| 0.179127  | noncoding |
| 0.999997  | coding    |
| 0.999994  | coding    |
| 0.0159881 | noncoding |
| 0.999998  | coding    |
| 0.0264056 | noncoding |
| 0.024744  | noncoding |
| 0.0340858 | noncoding |
| 1         | coding    |
| 1         | coding    |
| 0.248872  | noncoding |
| 0.0407059 | noncoding |
| 0.116154  | noncoding |
| 0.99999   | coding    |
| 0.0841672 | noncoding |
| 1         | coding    |
| 0.0720982 | noncoding |
| 1         | coding    |
| 0.978628  | coding    |
| 0.995938  | coding    |
| 0.995938  | coding    |
| 0.978628  | coding    |
| 1         | coding    |
| 0.595424  | coding    |
| 0.656502  | coding    |
| 0.684702  | coding    |
| 0.861286  | coding    |
| 0.999988  | coding    |
| 1         | coding    |
| 0.999969  | coding    |
| 0.0361487 | noncoding |
| 1         | coding    |
| 1         | coding    |
| 1         | coding    |
| 0.0577467 | noncoding |
| 0.999941  | coding    |
| 0.990308  | coding    |
| 1         | coding    |
| 0.999998  | coding    |
| 1         | coding    |
| 1         | coding    |
| 0.999995  | coding    |
| 0.99999   | coding    |
| 1         | coding    |
| 1         | coding    |
| 1         | coding    |
| 0.949259  | coding    |
| 1         | coding    |
| 1         | coding    |

|            |           |
|------------|-----------|
| 1          | coding    |
| 1          | coding    |
| 0.5807     | coding    |
| 0.5807     | coding    |
| 0.5807     | coding    |
| 1          | coding    |
| 0.999924   | coding    |
| 1          | coding    |
| 0.0371419  | noncoding |
| 0.151706   | noncoding |
| 0.127963   | noncoding |
| 0.0775948  | noncoding |
| 0.382298   | noncoding |
| 0.720741   | coding    |
| 0.104129   | noncoding |
| 0.210268   | noncoding |
| 0.784923   | coding    |
| 0.999996   | coding    |
| 0.110875   | noncoding |
| 0.374607   | noncoding |
| 0.0339801  | noncoding |
| 0.979266   | coding    |
| 0.212546   | noncoding |
| 1          | coding    |
| 0.109111   | noncoding |
| 0.109117   | noncoding |
| 0.0305526  | noncoding |
| 0.948965   | coding    |
| 0.159316   | noncoding |
| 0.245503   | noncoding |
| 0.968988   | coding    |
| 0.0597456  | noncoding |
| 1          | coding    |
| 0.288166   | noncoding |
| 0.470487   | noncoding |
| 0.779877   | coding    |
| 0.753005   | coding    |
| 0.020583   | noncoding |
| 1          | coding    |
| 1          | coding    |
| 1          | coding    |
| 0.213661   | noncoding |
| 0.998429   | coding    |
| 1          | coding    |
| 0.00435301 | noncoding |
| 0.886402   | coding    |
| 0.0745311  | noncoding |
| 0.639399   | coding    |
| 0.499543   | noncoding |
| 0.500199   | coding    |

|           |           |
|-----------|-----------|
| 0.514131  | coding    |
| 0.997553  | coding    |
| 0.17353   | noncoding |
| 0.997635  | coding    |
| 0.0421103 | noncoding |
| 0.0118299 | noncoding |
| 0.0254186 | noncoding |
| 0.999517  | coding    |
| 0.0230896 | noncoding |
| 1         | coding    |
| 0.117222  | noncoding |
| 0.0776115 | noncoding |
| 0.0246723 | noncoding |
| 0.0438262 | noncoding |
| 0.0205849 | noncoding |
| 0.0314529 | noncoding |
| 1         | coding    |
| 0.845762  | coding    |
| 0.507574  | coding    |
| 0.637771  | coding    |
| 0.63805   | coding    |
| 0.169474  | noncoding |
| 0.999998  | coding    |
| 0.999998  | coding    |
| 0.999998  | coding    |
| 0.124335  | noncoding |
| 0.999823  | coding    |
| 1         | coding    |
| 0.231981  | noncoding |
| 1         | coding    |
| 0.139457  | noncoding |
| 0.999973  | coding    |
| 0.891432  | coding    |
| 1         | coding    |
| 0.0124736 | noncoding |
| 0.245747  | noncoding |
| 0.0159483 | noncoding |
| 1         | coding    |
| 0.999996  | coding    |
| 1         | coding    |
| 1         | coding    |
| 1         | coding    |

|            |           |
|------------|-----------|
| 1          | coding    |
| 0.00891102 | noncoding |
| 0.999648   | coding    |
| 0.764797   | coding    |
| 0.970223   | coding    |
| 0.999998   | coding    |
| 0.999993   | coding    |
| 0.99999    | coding    |
| 0.993836   | coding    |
| 0.112316   | noncoding |
| 1          | coding    |
| 0.0903775  | noncoding |
| 0.0402646  | noncoding |
| 1          | coding    |
| 1          | coding    |
| 0.434547   | noncoding |
| 1          | coding    |
| 0.999645   | coding    |
| 0.114171   | noncoding |
| 0.539052   | coding    |
| 0.281107   | noncoding |
| 0.88126    | coding    |
| 0.97368    | coding    |
| 0.99993    | coding    |
| 0.997945   | coding    |
| 0.0202268  | noncoding |
| 1          | coding    |
| 0.137284   | noncoding |
| 0.879804   | coding    |
| 1          | coding    |
| 0.0508164  | noncoding |
| 0.411648   | noncoding |
| 0.890054   | coding    |
| 0.0293037  | noncoding |
| 0.160586   | noncoding |
| 0.346258   | noncoding |
| 0.38914    | noncoding |
| 0.382339   | noncoding |
| 0.0268282  | noncoding |
| 1          | coding    |
| 1          | coding    |
| 0.999982   | coding    |
| 0.0651059  | noncoding |
| 0.695267   | coding    |
| 0.102338   | noncoding |
| 0.0438454  | noncoding |

|            |           |
|------------|-----------|
| 0.834548   | coding    |
| 0.12524    | noncoding |
| 0.111833   | noncoding |
| 0.0351052  | noncoding |
| 0.85904    | coding    |
| 1          | coding    |
| 1          | coding    |
| 0.0411209  | noncoding |
| 0.108569   | noncoding |
| 1          | coding    |
| 0.999984   | coding    |
| 0.974574   | coding    |
| 1          | coding    |
| 1          | coding    |
| 0.23716    | noncoding |
| 0.0547002  | noncoding |
| 0.999989   | coding    |
| 0.145937   | noncoding |
| 0.00210001 | noncoding |
| 0.173521   | noncoding |
| 0.0286968  | noncoding |
| 1          | coding    |
| 0.0105349  | noncoding |
| 0.99988    | coding    |
| 1          | coding    |
| 0.995765   | coding    |
| 1          | coding    |
| 1          | coding    |
| 1          | coding    |
| 0.089477   | noncoding |
| 0.133808   | noncoding |
| 1          | coding    |
| 1          | coding    |
| 0.99946    | coding    |
| 0.041018   | noncoding |
| 0.0395692  | noncoding |
| 0.0901737  | noncoding |
| 1          | coding    |
| 0.999758   | coding    |
| 0.999236   | coding    |
| 0.92169    | coding    |
| 0.178419   | noncoding |
| 0.252132   | noncoding |
| 0.211192   | noncoding |
| 0.468716   | noncoding |
| 1          | coding    |
| 0.99996    | coding    |

|           |           |
|-----------|-----------|
| 1         | coding    |
| 0.999017  | coding    |
| 0.211211  | noncoding |
| 1         | coding    |
| 1         | coding    |
| 1         | coding    |
| 0.990991  | coding    |
| 1         | coding    |
| 0.999999  | coding    |
| 0.999968  | coding    |
| 0.687224  | coding    |
| 1         | coding    |
| 0.105273  | noncoding |
| 0.0988099 | noncoding |
| 0.0643975 | noncoding |
| 0.995891  | coding    |
| 0.789429  | coding    |
| 1         | coding    |
| 1         | coding    |
| 0.991112  | coding    |
| 1         | coding    |
| 1         | coding    |
| 1         | coding    |
| 0.999885  | coding    |
| 1         | coding    |
| 0.026762  | noncoding |
| 1         | coding    |
| 0.0721751 | noncoding |
| 0.298661  | noncoding |
| 1         | coding    |
| 1         | coding    |
| 1         | coding    |
| 0.997697  | coding    |
| 0.958876  | coding    |
| 0.246032  | noncoding |
| 1         | coding    |
| 1         | coding    |
| 0.395035  | noncoding |

|           |           |
|-----------|-----------|
| 1         | coding    |
| 0.0940598 | noncoding |
| 0.999729  | coding    |
| 1         | coding    |
| 1         | coding    |
| 0.0504994 | noncoding |
| 1         | coding    |
| 0.401816  | noncoding |
| 1         | coding    |
| 1         | coding    |
| 1         | coding    |
| 0.9199    | coding    |
| 1         | coding    |
| 1         | coding    |
| 1         | coding    |
| 0.996516  | coding    |
| 1         | coding    |
| 1         | coding    |
| 1         | coding    |
| 0.125044  | noncoding |
| 0.999999  | coding    |
| 1         | coding    |
| 1         | coding    |
| 1         | coding    |
| 0.953719  | coding    |
| 0.999952  | coding    |
| 1         | coding    |
| 0.168267  | noncoding |
| 0.89844   | coding    |
| 0.938356  | coding    |
| 0.142811  | noncoding |
| 0.0931245 | noncoding |
| 0.154767  | noncoding |
| 1         | coding    |
| 0.999988  | coding    |
| 0.680305  | coding    |
| 0.716964  | coding    |
| 0.0462046 | noncoding |
| 0.075032  | noncoding |
| 1         | coding    |
| 1         | coding    |

|            |           |
|------------|-----------|
| 0.999949   | coding    |
| 1          | coding    |
| 1          | coding    |
| 0.00647675 | noncoding |
| 0.997142   | coding    |
| 0.102811   | noncoding |
| 1          | coding    |
| 1          | coding    |
| 0.019129   | noncoding |
| 0.999992   | coding    |
| 0.999984   | coding    |
| 0.999971   | coding    |
| 0.137208   | noncoding |
| 0.991671   | coding    |
| 0.217677   | noncoding |
| 1          | coding    |
| 0.999867   | coding    |
| 0.999946   | coding    |
| 0.999998   | coding    |
| 0.0634916  | noncoding |
| 0.0653744  | noncoding |
| 1          | coding    |
| 0.147414   | noncoding |
| 1          | coding    |
| 1          | coding    |
| 0.0602189  | noncoding |
| 0.145868   | noncoding |
| 0.234052   | noncoding |
| 0.156669   | noncoding |
| 1          | coding    |
| 1          | coding    |
| 1          | coding    |
| 0.00653963 | noncoding |
| 1          | coding    |
| 0.116027   | noncoding |
| 0.400758   | noncoding |
| 0.492409   | noncoding |
| 0.148454   | noncoding |
| 0.993781   | coding    |
| 0.363398   | noncoding |
| 0.0231018  | noncoding |
| 0.111094   | noncoding |
| 0.0924082  | noncoding |
| 0.0332984  | noncoding |
| 0.0336059  | noncoding |
| 0.864863   | coding    |
| 0.999972   | coding    |
| 0.999993   | coding    |
| 0.999974   | coding    |
| 0.999965   | coding    |



[illegible]

|            |           |
|------------|-----------|
| 1          | coding    |
| 0.999991   | coding    |
| 1          | coding    |
| 0.999963   | coding    |
| 0.996076   | coding    |
| 1          | coding    |
| 1          | coding    |
| 0.884197   | coding    |
| 0.738383   | coding    |
| 0.0482034  | noncoding |
| 1          | coding    |
| 0.127132   | noncoding |
| 0.112318   | noncoding |
| 0.0155469  | noncoding |
| 1          | coding    |
| 1          | coding    |
| 0.999897   | coding    |
| 0.124973   | noncoding |
| 0.00961025 | noncoding |
| 0.0119962  | noncoding |
| 0.454047   | noncoding |
| 0.0421606  | noncoding |
| 1          | coding    |
| 1          | coding    |
| 0.725349   | coding    |
| 0.85257    | coding    |
| 1          | coding    |
| 1          | coding    |
| 1          | coding    |
| 0.999999   | coding    |
| 1          | coding    |
| 0.999984   | coding    |
| 1          | coding    |
| 0.999999   | coding    |
| 1          | coding    |
| 0.0545548  | noncoding |
| 0.015447   | noncoding |
| 0.0115388  | noncoding |
| 1          | coding    |
| 0.999996   | coding    |
| 0.878389   | coding    |
| 0.988537   | coding    |
| 0.122916   | noncoding |
| 0.999999   | coding    |
| 1          | coding    |
| 0.262085   | noncoding |
| 0.138846   | noncoding |

|            |           |
|------------|-----------|
| 0.0549288  | noncoding |
| 1          | coding    |
| 0.999999   | coding    |
| 1          | coding    |
| 0.134475   | noncoding |
| 1          | coding    |
| 0.0334653  | noncoding |
| 0.0435382  | noncoding |
| 0.0271204  | noncoding |
| 1          | coding    |
| 0.0495376  | noncoding |
| 0.999903   | coding    |
| 0.050276   | noncoding |
| 0.0781493  | noncoding |
| 1          | coding    |
| 1          | coding    |
| 1          | coding    |
| 0.0898303  | noncoding |
| 1          | coding    |
| 0.999997   | coding    |
| 0.107488   | noncoding |
| 0.00502141 | noncoding |
| 0.00482537 | noncoding |
| 0.034151   | noncoding |
| 0.31353    | noncoding |
| 0.261087   | noncoding |
| 0.969213   | coding    |
| 0.0686958  | noncoding |
| 0.461474   | noncoding |
| 0.213111   | noncoding |
| 0.170455   | noncoding |
| 0.149331   | noncoding |
| 0.176112   | noncoding |
| 0.776757   | coding    |
| 0.686271   | coding    |
| 0.685297   | coding    |
| 0.46739    | noncoding |
| 0.458387   | noncoding |
| 0.08165    | noncoding |
| 0.110949   | noncoding |
| 0.0436795  | noncoding |
| 0.51588    | coding    |
| 0.301508   | noncoding |
| 0.999996   | coding    |
| 0.944842   | coding    |
| 0.999639   | coding    |

|            |           |
|------------|-----------|
| 0.999326   | coding    |
| 0.086881   | noncoding |
| 0.200852   | noncoding |
| 0.999476   | coding    |
| 0.997311   | coding    |
| 0.148499   | noncoding |
| 1          | coding    |
| 1          | coding    |
| 0.999999   | coding    |
| 0.967265   | coding    |
| 0.999676   | coding    |
| 0.999591   | coding    |
| 1          | coding    |
| 1          | coding    |
| 1          | coding    |
| 0.999979   | coding    |
| 0.124453   | noncoding |
| 1          | coding    |
| 0.998084   | coding    |
| 0.784956   | coding    |
| 0.329513   | noncoding |
| 0.828757   | coding    |
| 0.999299   | coding    |
| 0.99974    | coding    |
| 0.0299092  | noncoding |
| 1          | coding    |
| 1          | coding    |
| 1          | coding    |
| 0.0274922  | noncoding |
| 0.0170928  | noncoding |
| 1          | coding    |
| 0.273352   | noncoding |
| 1          | coding    |
| 0.999697   | coding    |
| 1          | coding    |
| 1          | coding    |
| 0.00547312 | noncoding |
| 0.150428   | noncoding |
| 0.662526   | coding    |
| 0.150428   | noncoding |
| 0.0242863  | noncoding |
| 0.0190545  | noncoding |
| 1          | coding    |
| 0.216359   | noncoding |
| 0.262971   | noncoding |
| 0.273934   | noncoding |
| 0.112581   | noncoding |
| 0.0620198  | noncoding |
| 0.174349   | noncoding |
| 0.271843   | noncoding |
| 0.134132   | noncoding |
| 0.00963501 | noncoding |
| 0.00935342 | noncoding |
| 1          | coding    |

|           |           |
|-----------|-----------|
| 0.999399  | coding    |
| 0.20399   | noncoding |
| 1         | coding    |
| 0.0426727 | noncoding |
| 0.998353  | coding    |
| 1         | coding    |
| 0.998084  | coding    |
| 0.999999  | coding    |
| 1         | coding    |
| 0.0105154 | noncoding |
| 0.80821   | coding    |
| 0.59396   | coding    |
| 0.0246363 | noncoding |
| 0.0138497 | noncoding |
| 0.0315385 | noncoding |
| 1         | coding    |
| 1         | coding    |
| 0.999992  | coding    |
| 0.0631735 | noncoding |
| 0.0162355 | noncoding |
| 0.029103  | noncoding |
| 0.0363425 | noncoding |
| 1         | coding    |
| 0.453851  | noncoding |
| 0.320417  | noncoding |
| 0.135671  | noncoding |
| 0.0312502 | noncoding |
| 1         | coding    |
| 0.0845799 | noncoding |
| 1         | coding    |

|            |           |
|------------|-----------|
| 1          | coding    |
| 0.0255886  | noncoding |
| 0.904547   | coding    |
| 1          | coding    |
| 0.212068   | noncoding |
| 0.0547668  | noncoding |
| 0.0266138  | noncoding |
| 0.998763   | coding    |
| 0.127236   | noncoding |
| 0.013792   | noncoding |
| 0.0173134  | noncoding |
| 1          | coding    |
| 0.553219   | coding    |
| 0.063078   | noncoding |
| 0.23668    | noncoding |
| 0.150074   | noncoding |
| 0.462229   | noncoding |
| 0.999167   | coding    |
| 0.145514   | noncoding |
| 0.143277   | noncoding |
| 0.0380008  | noncoding |
| 0.141733   | noncoding |
| 0.00556106 | noncoding |
| 0.00548045 | noncoding |
| 0.986426   | coding    |
| 0.0193131  | noncoding |
| 0.0317676  | noncoding |
| 0.0345281  | noncoding |
| 0.0268154  | noncoding |
| 0.0941139  | noncoding |
| 0.0830204  | noncoding |
| 1          | coding    |
| 0.999986   | coding    |
| 0.999998   | coding    |
| 1          | coding    |
| 1          | coding    |
| 0.291866   | noncoding |
| 0.999984   | coding    |
| 0.999999   | coding    |
| 1          | coding    |
| 0.999571   | coding    |

|           |           |
|-----------|-----------|
| 0.999156  | coding    |
| 0.999847  | coding    |
| 0.999646  | coding    |
| 0.988087  | coding    |
| 0.521257  | coding    |
| 0.342935  | noncoding |
| 0.995578  | coding    |
| 0.999999  | coding    |
| 0.999147  | coding    |
| 0.99958   | coding    |
| 0.059792  | noncoding |
| 0.0141815 | noncoding |
| 0.178354  | noncoding |
| 0.585509  | coding    |
| 0.140141  | noncoding |
| 0.110334  | noncoding |
| 0.0843518 | noncoding |
| 0.183342  | noncoding |
| 0.491729  | noncoding |
| 0.779942  | coding    |
| 0.0289344 | noncoding |
| 0.268986  | noncoding |
| 0.614806  | coding    |
| 0.993666  | coding    |
| 0.0319297 | noncoding |
| 0.516661  | coding    |
| 0.999335  | coding    |
| 0.074588  | noncoding |
| 0.0186606 | noncoding |
| 0.732509  | coding    |
| 0.112551  | noncoding |
| 0.999045  | coding    |
| 0.999983  | coding    |
| 0.165557  | noncoding |
| 0.571533  | coding    |
| 0.675682  | coding    |
| 0.0518233 | noncoding |
| 0.0594466 | noncoding |
| 0.0422015 | noncoding |
| 0.070116  | noncoding |
| 0.203096  | noncoding |
| 0.0953363 | noncoding |
| 0.0411492 | noncoding |
| 0.152102  | noncoding |
| 0.0871416 | noncoding |
| 0.353345  | noncoding |
| 0.0572674 | noncoding |
| 0.085128  | noncoding |
| 1         | coding    |
| 0.614494  | coding    |
| 1         | coding    |
| 1         | coding    |
| 0.999245  | coding    |
| 0.994847  | coding    |

|           |           |
|-----------|-----------|
| 0.998991  | coding    |
| 0.0754239 | noncoding |
| 0.0754239 | noncoding |
| 0.0890645 | noncoding |
| 0.901681  | coding    |
| 0.999968  | coding    |
| 0.0738876 | noncoding |
| 0.05498   | noncoding |
| 0.0407475 | noncoding |
| 0.984625  | coding    |
| 1         | coding    |
| 0.989925  | coding    |
| 0.54886   | coding    |
| 1         | coding    |
| 1         | coding    |
| 0.999196  | coding    |
| 0.999196  | coding    |
| 0.121607  | noncoding |
| 0.0329917 | noncoding |
| 0.0106755 | noncoding |
| 1         | coding    |
| 1         | coding    |
| 0.101343  | noncoding |
| 0.999998  | coding    |
| 0.209588  | noncoding |
| 0.999999  | coding    |
| 0.717948  | coding    |
| 0.580418  | coding    |
| 0.580418  | coding    |
| 0.758907  | coding    |
| 0.376038  | noncoding |
| 1         | coding    |
| 0.0917205 | noncoding |
| 0.999999  | coding    |
| 1         | coding    |
| 0.21426   | noncoding |
| 0.991874  | coding    |
| 0.991874  | coding    |
| 0.115329  | noncoding |
| 0.0528915 | noncoding |
| 0.998054  | coding    |
| 0.997717  | coding    |
| 0.122883  | noncoding |
| 0.999867  | coding    |
| 0.163435  | noncoding |
| 0.987353  | coding    |
| 0.975747  | coding    |
| 0.80632   | coding    |
| 0.764169  | coding    |
| 0.152445  | noncoding |
| 0.0512142 | noncoding |
| 0.0373861 | noncoding |
| 1         | coding    |
| 1         | coding    |



|            |           |
|------------|-----------|
| 1          | coding    |
| 0.99999    | coding    |
| 1          | coding    |
| 0.12523    | noncoding |
| 0.959907   | coding    |
| 0.922878   | coding    |
| 1          | coding    |
| 0.944131   | coding    |
| 1          | coding    |
| 0.00699834 | noncoding |
| 0.0927873  | noncoding |
| 0.0652667  | noncoding |
| 0.0405725  | noncoding |
| 0.0300494  | noncoding |
| 0.0336859  | noncoding |
| 0.0372746  | noncoding |
| 0.157795   | noncoding |
| 0.0215865  | noncoding |
| 0.16954    | noncoding |
| 0.896979   | coding    |
| 0.861174   | coding    |
| 0.982161   | coding    |
| 0.692655   | coding    |
| 0.321419   | noncoding |
| 0.0882768  | noncoding |
| 0.00178136 | noncoding |
| 0.00830591 | noncoding |
| 1          | coding    |
| 1          | coding    |
| 0.53719    | coding    |
| 1          | coding    |
| 0.0410312  | noncoding |
| 0.163719   | noncoding |
| 0.151375   | noncoding |
| 0.0348797  | noncoding |
| 0.362339   | noncoding |
| 1          | coding    |
| 0.990286   | coding    |
| 0.993924   | coding    |
| 0.463517   | noncoding |
| 1          | coding    |
| 0.999997   | coding    |
| 1          | coding    |
| 1          | coding    |

|           |           |
|-----------|-----------|
| 1         | coding    |
| 0.999997  | coding    |
| 0.972074  | coding    |
| 0.976872  | coding    |
| 0.158274  | noncoding |
| 0.830538  | coding    |
| 0.0689521 | noncoding |
| 1         | coding    |
| 1         | coding    |
| 0.237291  | noncoding |
| 0.0395219 | noncoding |
| 0.0540782 | noncoding |
| 0.0482167 | noncoding |
| 0.049158  | noncoding |
| 0.0409355 | noncoding |
| 1         | coding    |
| 1         | coding    |
| 1         | coding    |
| 0.920174  | coding    |
| 0.979745  | coding    |
| 1         | coding    |
| 0.943318  | coding    |
| 1         | coding    |
| 0.790547  | coding    |
| 0.151464  | noncoding |
| 1         | coding    |
| 1         | coding    |
| 0.189384  | noncoding |
| 1         | coding    |
| 0.999983  | coding    |
| 1         | coding    |
| 1         | coding    |
| 0.999999  | coding    |
| 0.999999  | coding    |
| 0.999999  | coding    |
| 0.954011  | coding    |
| 0.145147  | noncoding |
| 0.999999  | coding    |
| 0.995008  | coding    |
| 0.999961  | coding    |
| 0.100318  | noncoding |
| 0.999999  | coding    |
| 0.988997  | coding    |
| 0.0341298 | noncoding |
| 0.0746082 | noncoding |
| 0.0805451 | noncoding |
| 1         | coding    |
| 0.463437  | noncoding |
| 0.891381  | coding    |
| 0.938758  | coding    |
| 0.058587  | noncoding |

|           |           |
|-----------|-----------|
| 0.138946  | noncoding |
| 0.777315  | coding    |
| 1         | coding    |
| 0.0198353 | noncoding |
| 0.202624  | noncoding |
| 0.380679  | noncoding |
| 1         | coding    |
| 1         | coding    |
| 0.999999  | coding    |
| 1         | coding    |
| 0.118328  | noncoding |
| 0.117209  | noncoding |
| 0.119155  | noncoding |
| 0.0717205 | noncoding |
| 0.0347312 | noncoding |
| 0.0561409 | noncoding |
| 0.0562315 | noncoding |
| 0.0209026 | noncoding |
| 1         | coding    |
| 0.937447  | coding    |
| 0.701095  | coding    |
| 1         | coding    |
| 0.158466  | noncoding |
| 0.0145537 | noncoding |
| 0.999826  | coding    |
| 0.108498  | noncoding |
| 0.0313207 | noncoding |
| 0.050609  | noncoding |
| 0.987458  | coding    |
| 0.0897015 | noncoding |
| 0.0599063 | noncoding |
| 0.0701193 | noncoding |
| 0.114212  | noncoding |
| 0.53937   | coding    |
| 0.0942679 | noncoding |
| 0.350769  | noncoding |
| 0.0433604 | noncoding |
| 0.0560449 | noncoding |
| 1         | coding    |
| 0.642409  | coding    |
| 1         | coding    |
| 0.807539  | coding    |
| 0.999994  | coding    |
| 1         | coding    |
| 0.990203  | coding    |
| 1         | coding    |

|            |           |
|------------|-----------|
| 1          | coding    |
| 0.0499189  | noncoding |
| 0.485349   | noncoding |
| 0.0566006  | noncoding |
| 0.0367204  | noncoding |
| 0.0244028  | noncoding |
| 1          | coding    |
| 0.0182307  | noncoding |
| 0.202178   | noncoding |
| 0.157003   | noncoding |
| 0.238916   | noncoding |
| 0.061364   | noncoding |
| 0.0382617  | noncoding |
| 0.00596984 | noncoding |
| 0.106748   | noncoding |
| 0.146721   | noncoding |
| 0.812735   | coding    |
| 0.0583104  | noncoding |
| 0.04017    | noncoding |
| 0.0217188  | noncoding |
| 0.999999   | coding    |
| 0.999989   | coding    |
| 0.272045   | noncoding |
| 0.0150863  | noncoding |
| 0.071598   | noncoding |
| 0.101873   | noncoding |
| 0.998974   | coding    |
| 0.999473   | coding    |
| 0.798903   | coding    |
| 0.0799607  | noncoding |
| 0.0580417  | noncoding |
| 0.996704   | coding    |
| 0.992467   | coding    |
| 0.0505692  | noncoding |
| 1          | coding    |
| 1          | coding    |
| 0.223893   | noncoding |
| 0.105748   | noncoding |
| 0.0851065  | noncoding |
| 1          | coding    |
| 0.15521    | noncoding |
| 0.0254006  | noncoding |
| 0.017315   | noncoding |
| 0.0371787  | noncoding |
| 0.208694   | noncoding |
| 0.97101    | coding    |
| 0.982053   | coding    |
| 0.618636   | coding    |
| 0.177673   | noncoding |
| 0.999785   | coding    |
| 0.994738   | coding    |
| 0.99211    | coding    |
| 0.999821   | coding    |
| 0.99984    | coding    |

|            |           |
|------------|-----------|
| 1          | coding    |
| 0.931465   | coding    |
| 1          | coding    |
| 1          | coding    |
| 0.150514   | noncoding |
| 0.2723     | noncoding |
| 0.143414   | noncoding |
| 0.105347   | noncoding |
| 0.99721    | coding    |
| 0.996782   | coding    |
| 0.679643   | coding    |
| 0.621161   | coding    |
| 0.011896   | noncoding |
| 0.760597   | coding    |
| 1          | coding    |
| 0.115183   | noncoding |
| 0.345566   | noncoding |
| 0.0115137  | noncoding |
| 1          | coding    |
| 1          | coding    |
| 0.999563   | coding    |
| 0.978268   | coding    |
| 1          | coding    |
| 1          | coding    |
| 0.470891   | noncoding |
| 0.463125   | noncoding |
| 0.460427   | noncoding |
| 0.263933   | noncoding |
| 0.0215835  | noncoding |
| 0.318557   | noncoding |
| 0.219502   | noncoding |
| 0.00390816 | noncoding |
| 1          | coding    |
| 0.895154   | coding    |
| 0.999948   | coding    |
| 0.999759   | coding    |
| 0.564828   | coding    |
| 1          | coding    |
| 1          | coding    |
| 0.0112541  | noncoding |
| 0.0856442  | noncoding |
| 1          | coding    |
| 0.0304065  | noncoding |
| 0.0560952  | noncoding |
| 1          | coding    |
| 0.0542197  | noncoding |
| 0.0147414  | noncoding |
| 1          | coding    |
| 1          | coding    |
| 1          | coding    |
| 0.997671   | coding    |
| 0.572234   | coding    |
| 1          | coding    |
| 0.145953   | noncoding |

|            |           |
|------------|-----------|
| 0.197843   | noncoding |
| 0.017705   | noncoding |
| 0.0155591  | noncoding |
| 0.020148   | noncoding |
| 0.999999   | coding    |
| 1          | coding    |
| 0.00200987 | noncoding |
| 1          | coding    |
| 1          | coding    |
| 0.258022   | noncoding |
| 1          | coding    |
| 0.293678   | noncoding |
| 1          | coding    |
| 0.136959   | noncoding |
| 0.077518   | noncoding |
| 0.0262041  | noncoding |
| 1          | coding    |
| 0.398562   | noncoding |
| 0.121269   | noncoding |
| 0.985132   | coding    |
| 0.891837   | coding    |
| 1          | coding    |
| 0.993345   | coding    |
| 1          | coding    |
| 0.822945   | coding    |
| 0.68833    | coding    |
| 0.894668   | coding    |
| 0.14157    | noncoding |
| 0.646815   | coding    |
| 0.785312   | coding    |
| 0.172874   | noncoding |
| 0.040406   | noncoding |
| 0.194121   | noncoding |
| 0.754335   | coding    |
| 0.0738561  | noncoding |
| 0.0453097  | noncoding |
| 1          | coding    |
| 0.338673   | noncoding |
| 1          | coding    |
| 1          | coding    |

[illegible]

|           |           |
|-----------|-----------|
| 0.999853  | coding    |
| 1         | coding    |
| 0.999902  | coding    |
| 1         | coding    |
| 0.363746  | noncoding |
| 0.207158  | noncoding |
| 0.1538    | noncoding |
| 0.506022  | coding    |
| 0.21844   | noncoding |
| 0.393742  | noncoding |
| 0.0773016 | noncoding |
| 0.865033  | coding    |
| 0.144654  | noncoding |
| 0.313515  | noncoding |
| 0.174869  | noncoding |
| 0.322113  | noncoding |
| 0.0368633 | noncoding |
| 0.266598  | noncoding |
| 0.266598  | noncoding |
| 0.266598  | noncoding |
| 0.184136  | noncoding |
| 0.184136  | noncoding |
| 0.23089   | noncoding |
| 0.397991  | noncoding |
| 0.144889  | noncoding |
| 0.138112  | noncoding |
| 0.457512  | noncoding |
| 0.912765  | coding    |
| 0.467767  | noncoding |
| 0.89686   | coding    |
| 0.400704  | noncoding |
| 0.979184  | coding    |
| 1         | coding    |
| 0.999468  | coding    |
| 0.999574  | coding    |
| 0.115472  | noncoding |
| 0.999965  | coding    |
| 0.999998  | coding    |
| 0.999977  | coding    |
| 1         | coding    |
| 1         | coding    |
| 0.736423  | coding    |
| 0.999993  | coding    |
| 0.999999  | coding    |
| 0.999998  | coding    |
| 0.999995  | coding    |
| 0.999995  | coding    |
| 0.999618  | coding    |
| 0.44147   | noncoding |
| 0.809009  | coding    |
| 0.0523117 | noncoding |



|           |           |
|-----------|-----------|
| 0.201956  | noncoding |
| 0.999968  | coding    |
| 0.996555  | coding    |
| 0.170598  | noncoding |
| 0.0490666 | noncoding |
| 1         | coding    |
| 1         | coding    |
| 0.0722067 | noncoding |
| 0.121743  | noncoding |
| 1         | coding    |
| 0.999999  | coding    |
| 1         | coding    |
| 0.999993  | coding    |
| 0.999999  | coding    |
| 0.999986  | coding    |
| 0.201086  | noncoding |
| 0.49625   | noncoding |
| 0.0473616 | noncoding |
| 0.595768  | coding    |
| 0.633062  | coding    |
| 0.998765  | coding    |
| 0.991467  | coding    |
| 0.952873  | coding    |
| 0.240366  | noncoding |
| 1         | coding    |
| 0.0154955 | noncoding |
| 0.0154949 | noncoding |
| 0.0707175 | noncoding |
| 0.927097  | coding    |
| 0.0451199 | noncoding |
| 0.119391  | noncoding |
| 0.0868639 | noncoding |
| 0.0827664 | noncoding |
| 0.411471  | noncoding |
| 1         | coding    |
| 0.121579  | noncoding |
| 1         | coding    |
| 1         | coding    |
| 1         | coding    |
| 0.0061632 | noncoding |
| 0.0217743 | noncoding |
| 0.0208166 | noncoding |
| 0.0200762 | noncoding |

|           |           |
|-----------|-----------|
| 0.996472  | coding    |
| 1         | coding    |
| 1         | coding    |
| 1         | coding    |
| 0.996808  | coding    |
| 0.993404  | coding    |
| 1         | coding    |
| 1         | coding    |
| 1         | coding    |
| 0.999999  | coding    |
| 1         | coding    |
| 1         | coding    |
| 1         | coding    |
| 0.386692  | noncoding |
| 0.123158  | noncoding |
| 0.292728  | noncoding |
| 0.125971  | noncoding |
| 0.0770968 | noncoding |
| 1         | coding    |
| 1         | coding    |
| 0.138167  | noncoding |
| 0.959277  | coding    |
| 0.971336  | coding    |
| 1         | coding    |
| 0.140004  | noncoding |
| 1         | coding    |
| 1         | coding    |
| 1         | coding    |
| 0.139761  | noncoding |
| 1         | coding    |
| 1         | coding    |
| 1         | coding    |
| 0.985024  | coding    |
| 0.762565  | coding    |
| 1         | coding    |
| 1         | coding    |
| 1         | coding    |
| 0.987741  | coding    |
| 1         | coding    |
| 0.999999  | coding    |
| 1         | coding    |
| 0.384875  | noncoding |
| 1         | coding    |
| 0.0583701 | noncoding |
| 0.208663  | noncoding |

[illegible]

|            |           |
|------------|-----------|
| 0.273922   | noncoding |
| 0.999985   | coding    |
| 0.160989   | noncoding |
| 0.999712   | coding    |
| 0.999925   | coding    |
| 0.995761   | coding    |
| 0.00473052 | noncoding |
| 1          | coding    |
| 1          | coding    |
| 1          | coding    |
| 0.235887   | noncoding |
| 1          | coding    |
| 0.279449   | noncoding |
| 0.999999   | coding    |
| 1          | coding    |
| 1          | coding    |
| 0.220344   | noncoding |
| 0.119079   | noncoding |
| 0.077863   | noncoding |
| 0.00985415 | noncoding |
| 0.308512   | noncoding |
| 1          | coding    |
| 0.0937075  | noncoding |
| 0.200949   | noncoding |
| 0.688146   | coding    |
| 0.999988   | coding    |
| 1          | coding    |
| 1          | coding    |
| 1          | coding    |
| 0.820586   | coding    |
| 0.132253   | noncoding |
| 0.0181405  | noncoding |
| 0.999986   | coding    |
| 0.0638211  | noncoding |
| 0.996151   | coding    |
| 0.945394   | coding    |
| 0.0128264  | noncoding |
| 1          | coding    |
| 0.983667   | coding    |
| 0.987404   | coding    |
| 0.208106   | noncoding |
| 0.00223908 | noncoding |
| 0.240896   | noncoding |
| 0.371406   | noncoding |
| 0.999956   | coding    |
| 1          | coding    |
| 0.999956   | coding    |
| 1          | coding    |
| 1          | coding    |
| 0.999944   | coding    |
| 1          | coding    |

|           |           |
|-----------|-----------|
| 0.99922   | coding    |
| 0.079437  | noncoding |
| 0.167997  | noncoding |
| 0.3603    | noncoding |
| 1         | coding    |
| 0.672637  | coding    |
| 0.0145398 | noncoding |
| 0.116318  | noncoding |
| 1         | coding    |
| 0.0778558 | noncoding |
| 1         | coding    |
| 0.17566   | noncoding |
| 0.254144  | noncoding |
| 1         | coding    |
| 0.143597  | noncoding |
| 1         | coding    |
| 1         | coding    |
| 0.25921   | noncoding |
| 1         | coding    |
| 0.0184935 | noncoding |
| 0.999981  | coding    |
| 0.217418  | noncoding |
| 0.0654207 | noncoding |
| 1         | coding    |
| 1         | coding    |
| 0.999999  | coding    |
| 0.520921  | coding    |
| 0.994754  | coding    |
| 0.998239  | coding    |
| 1         | coding    |
| 0.999439  | coding    |
| 1         | coding    |
| 0.998946  | coding    |
| 0.999611  | coding    |
| 0.999749  | coding    |
| 0.99974   | coding    |
| 0.993791  | coding    |
| 0.993938  | coding    |
| 0.998655  | coding    |
| 0.430718  | noncoding |
| 0.98707   | coding    |
| 0.986441  | coding    |
| 0.984315  | coding    |
| 1         | coding    |
| 0.174493  | noncoding |
| 0.999755  | coding    |

|            |           |
|------------|-----------|
| 1          | coding    |
| 1          | coding    |
| 0.995744   | coding    |
| 0.608295   | coding    |
| 1          | coding    |
| 0.116496   | noncoding |
| 1          | coding    |
| 1          | coding    |
| 0.999999   | coding    |
| 1          | coding    |
| 1          | coding    |
| 1          | coding    |
| 0.932739   | coding    |
| 0.999998   | coding    |
| 1          | coding    |
| 1          | coding    |
| 1          | coding    |
| 0.999218   | coding    |
| 0.99993    | coding    |
| 0.230883   | noncoding |
| 1          | coding    |
| 0.64974    | coding    |
| 0.998257   | coding    |
| 1          | coding    |
| 1          | coding    |
| 0.999456   | coding    |
| 0.995253   | coding    |
| 0.983368   | coding    |
| 1          | coding    |
| 0.212024   | noncoding |
| 0.19447    | noncoding |
| 0.126588   | noncoding |
| 0.144929   | noncoding |
| 0.104256   | noncoding |
| 0.101869   | noncoding |
| 0.999686   | coding    |
| 1          | coding    |
| 0.997569   | coding    |
| 0.00861748 | noncoding |
| 1          | coding    |
| 1          | coding    |
| 0.999743   | coding    |
| 0.963721   | coding    |
| 0.00357364 | noncoding |
| 0.989219   | coding    |
| 0.0470353  | noncoding |
| 0.147865   | noncoding |
| 0.999998   | coding    |

|            |           |
|------------|-----------|
| 0.999998   | coding    |
| 0.999999   | coding    |
| 1          | coding    |
| 0.0342273  | noncoding |
| 0.999998   | coding    |
| 0.999997   | coding    |
| 0.375679   | noncoding |
| 0.199577   | noncoding |
| 0.0112574  | noncoding |
| 0.0154687  | noncoding |
| 0.999954   | coding    |
| 0.00460551 | noncoding |
| 0.619652   | coding    |
| 1          | coding    |
| 1          | coding    |
| 0.801001   | coding    |
| 0.999996   | coding    |
| 0.999992   | coding    |
| 0.999999   | coding    |
| 1          | coding    |
| 0.999991   | coding    |
| 0.0288959  | noncoding |
| 0.0364982  | noncoding |
| 1          | coding    |
| 0.0288027  | noncoding |
| 1          | coding    |
| 0.126821   | noncoding |
| 1          | coding    |
| 1          | coding    |
| 0.999979   | coding    |
| 1          | coding    |
| 0.0714836  | noncoding |
| 1          | coding    |
| 0.00622154 | noncoding |
| 0.114055   | noncoding |
| 1          | coding    |
| 1          | coding    |
| 0.999701   | coding    |
| 0.418947   | noncoding |
| 0.959843   | coding    |
| 0.126644   | noncoding |
| 0.989985   | coding    |

|            |           |
|------------|-----------|
| 0.724085   | coding    |
| 0.0907133  | noncoding |
| 0.630787   | coding    |
| 0.999874   | coding    |
| 0.999986   | coding    |
| 0.629553   | coding    |
| 0.742466   | coding    |
| 0.622014   | coding    |
| 1          | coding    |
| 0.543221   | coding    |
| 0.365208   | noncoding |
| 0.105564   | noncoding |
| 1          | coding    |
| 0.998874   | coding    |
| 0.703954   | coding    |
| 1          | coding    |
| 0.0269305  | noncoding |
| 0.998788   | coding    |
| 0.00838527 | noncoding |
| 0.99998    | coding    |
| 0.99912    | coding    |
| 1          | coding    |
| 0.840786   | coding    |
| 1          | coding    |
| 0.225819   | noncoding |
| 0.225819   | noncoding |
| 0.276141   | noncoding |
| 1          | coding    |
| 0.601466   | coding    |
| 0.171513   | noncoding |
| 1          | coding    |
| 1          | coding    |
| 0.419155   | noncoding |
| 0.999995   | coding    |
| 0.999991   | coding    |
| 0.999776   | coding    |
| 0.998493   | coding    |
| 1          | coding    |
| 1          | coding    |
| 1          | coding    |



|           |           |
|-----------|-----------|
| 0.0477139 | noncoding |
| 0.661916  | coding    |
| 0.0406335 | noncoding |
| 1         | coding    |
| 0.502556  | coding    |
| 0.0926892 | noncoding |
| 0.143608  | noncoding |
| 0.0752643 | noncoding |
| 0.0292938 | noncoding |
| 0.0189227 | noncoding |
| 0.856684  | coding    |
| 0.376649  | noncoding |
| 0.0199112 | noncoding |
| 0.217481  | noncoding |
| 0.165385  | noncoding |
| 0.228405  | noncoding |
| 0.027834  | noncoding |
| 1         | coding    |
| 0.132124  | noncoding |
| 1         | coding    |
| 0.0699397 | noncoding |
| 0.25651   | noncoding |
| 0.0116241 | noncoding |
| 0.0213757 | noncoding |
| 0.129166  | noncoding |
| 0.103361  | noncoding |
| 0.0515797 | noncoding |
| 0.978999  | coding    |
| 0.999961  | coding    |
| 0.89136   | coding    |
| 1         | coding    |
| 0.999997  | coding    |
| 1         | coding    |
| 1         | coding    |
| 0.0458925 | noncoding |
| 0.028368  | noncoding |
| 0.998307  | coding    |
| 0.97026   | coding    |
| 0.504575  | coding    |
| 0.572518  | coding    |
| 0.999961  | coding    |
| 0.0806987 | noncoding |
| 0.999572  | coding    |
| 1         | coding    |
| 1         | coding    |
| 0.99994   | coding    |
| 0.96683   | coding    |
| 0.841054  | coding    |

|           |           |
|-----------|-----------|
| 0.855269  | coding    |
| 0.967103  | coding    |
| 0.974705  | coding    |
| 0.210628  | noncoding |
| 0.3017    | noncoding |
| 0.999487  | coding    |
| 0.158576  | noncoding |
| 0.0948201 | noncoding |
| 0.0948201 | noncoding |
| 0.15459   | noncoding |
| 0.0978492 | noncoding |
| 0.827498  | coding    |
| 0.416283  | noncoding |
| 0.288647  | noncoding |
| 0.203607  | noncoding |
| 0.962432  | coding    |
| 0.945527  | coding    |
| 0.940708  | coding    |
| 0.110197  | noncoding |
| 0.999983  | coding    |
| 1         | coding    |
| 0.993211  | coding    |
| 1         | coding    |
| 0.925701  | coding    |
| 0.863087  | coding    |
| 0.663319  | coding    |
| 0.0605959 | noncoding |
| 1         | coding    |
| 0.954299  | coding    |
| 1         | coding    |
| 1         | coding    |
| 1         | coding    |
| 0.0172171 | noncoding |
| 1         | coding    |
| 0.608443  | coding    |
| 1         | coding    |
| 1         | coding    |
| 1         | coding    |
| 0.0726483 | noncoding |
| 0.0351996 | noncoding |
| 1         | coding    |
| 0.197329  | noncoding |
| 1         | coding    |

|           |           |
|-----------|-----------|
| 1         | coding    |
| 0.995263  | coding    |
| 1         | coding    |
| 0.179884  | noncoding |
| 1         | coding    |
| 0.175902  | noncoding |
| 0.220181  | noncoding |
| 0.0580667 | noncoding |
| 0.0383977 | noncoding |
| 0.342847  | noncoding |
| 0.349213  | noncoding |
| 0.202228  | noncoding |
| 0.0257323 | noncoding |
| 0.112023  | noncoding |
| 0.999914  | coding    |
| 0.99989   | coding    |
| 0.998325  | coding    |
| 0.999914  | coding    |
| 0.99989   | coding    |
| 0.999954  | coding    |
| 0.363675  | noncoding |
| 0.0404145 | noncoding |
| 0.0404145 | noncoding |
| 1         | coding    |
| 1         | coding    |
| 0.812076  | coding    |
| 0.969127  | coding    |
| 0.428765  | noncoding |
| 0.949063  | coding    |
| 0.216641  | noncoding |
| 0.870701  | coding    |
| 0.721945  | coding    |
| 1         | coding    |
| 1         | coding    |
| 0.409877  | noncoding |
| 0.620646  | coding    |
| 0.0497334 | noncoding |
| 0.174017  | noncoding |
| 0.248254  | noncoding |
| 0.185507  | noncoding |
| 0.115815  | noncoding |
| 1         | coding    |
| 0.156253  | noncoding |
| 0.879282  | coding    |
| 0.995511  | coding    |
| 0.99956   | coding    |
| 0.999763  | coding    |
| 0.197708  | noncoding |
| 1         | coding    |
| 0.31489   | noncoding |
| 0.0458344 | noncoding |
| 0.256759  | noncoding |
| 0.0731482 | noncoding |
| 1         | coding    |

|           |           |
|-----------|-----------|
| 1         | coding    |
| 0.998422  | coding    |
| 0.996975  | coding    |
| 0.0660755 | noncoding |
| 0.191621  | noncoding |
| 0.0619828 | noncoding |
| 0.400646  | noncoding |
| 0.034291  | noncoding |
| 0.0257341 | noncoding |
| 0.0788783 | noncoding |
| 0.989473  | coding    |
| 0.999325  | coding    |
| 0.998802  | coding    |
| 0.998101  | coding    |
| 0.3161    | noncoding |
| 0.397987  | noncoding |
| 1         | coding    |
| 1         | coding    |
| 0.999999  | coding    |
| 1         | coding    |
| 0.999062  | coding    |
| 0.154717  | noncoding |
| 1         | coding    |
| 1         | coding    |
| 0.987759  | coding    |
| 0.90143   | coding    |
| 1         | coding    |
| 0.57253   | coding    |
| 0.255966  | noncoding |
| 1         | coding    |
| 0.99603   | coding    |
| 0.999724  | coding    |
| 0.999655  | coding    |
| 1         | coding    |
| 0.999994  | coding    |
| 1         | coding    |
| 1         | coding    |
| 0.999879  | coding    |
| 1         | coding    |
| 0.999996  | coding    |
| 0.186817  | noncoding |
| 0.729645  | coding    |

|            |           |
|------------|-----------|
| 1          | coding    |
| 0.122825   | noncoding |
| 0.00757333 | noncoding |
| 1          | coding    |
| 0.999963   | coding    |
| 1          | coding    |
| 1          | coding    |
| 0.999962   | coding    |
| 0.99988    | coding    |
| 0.99994    | coding    |
| 0.999819   | coding    |
| 1          | coding    |
| 1          | coding    |
| 0.449162   | noncoding |
| 0.351141   | noncoding |
| 0.876828   | coding    |
| 0.783645   | coding    |
| 0.343768   | noncoding |
| 0.224164   | noncoding |
| 0.351705   | noncoding |
| 0.764922   | coding    |
| 0.605488   | coding    |
| 0.766277   | coding    |
| 0.999551   | coding    |
| 0.999919   | coding    |
| 0.99974    | coding    |
| 1          | coding    |
| 0.119941   | noncoding |
| 0.0661847  | noncoding |
| 1          | coding    |
| 0.999981   | coding    |
| 1          | coding    |
| 0.383715   | noncoding |
| 0.0462898  | noncoding |
| 1          | coding    |
| 0.181038   | noncoding |
| 1          | coding    |
| 0.00723009 | noncoding |
| 1          | coding    |
| 0.0435455  | noncoding |
| 0.730302   | coding    |

|            |           |
|------------|-----------|
| 0.382484   | noncoding |
| 0.242157   | noncoding |
| 1          | coding    |
| 0.832643   | coding    |
| 1          | coding    |
| 0.590465   | coding    |
| 1          | coding    |
| 0.0938949  | noncoding |
| 0.033827   | noncoding |
| 0.432072   | noncoding |
| 0.574456   | coding    |
| 0.909976   | coding    |
| 0.999197   | coding    |
| 0.0103357  | noncoding |
| 0.0615632  | noncoding |
| 0.176623   | noncoding |
| 1          | coding    |
| 0.14369    | noncoding |
| 0.999972   | coding    |
| 0.0674544  | noncoding |
| 0.121765   | noncoding |
| 0.204515   | noncoding |
| 0.0396381  | noncoding |
| 0.0175772  | noncoding |
| 0.148075   | noncoding |
| 0.146762   | noncoding |
| 0.999863   | coding    |
| 0.999999   | coding    |
| 0.999999   | coding    |
| 0.999995   | coding    |
| 0.732256   | coding    |
| 0.730114   | coding    |
| 1          | coding    |
| 1          | coding    |
| 0.00954336 | noncoding |
| 0.98952    | coding    |
| 0.9612     | coding    |
| 1          | coding    |
| 0.0212971  | noncoding |
| 1          | coding    |
| 0.0274906  | noncoding |
| 0.988619   | coding    |
| 1          | coding    |
| 1          | coding    |
| 0.441595   | noncoding |
| 0.445708   | noncoding |
| 0.25237    | noncoding |
| 0.0110099  | noncoding |
| 0.0144579  | noncoding |
| 0.520352   | coding    |
| 0.0615865  | noncoding |

|            |           |
|------------|-----------|
| 0.363816   | noncoding |
| 0.085272   | noncoding |
| 0.0740344  | noncoding |
| 0.0690106  | noncoding |
| 0.0531077  | noncoding |
| 0.751931   | coding    |
| 0.0456968  | noncoding |
| 0.26113    | noncoding |
| 0.595842   | coding    |
| 0.00796255 | noncoding |
| 0.976986   | coding    |
| 0.979854   | coding    |
| 0.341021   | noncoding |
| 0.189891   | noncoding |
| 0.0320713  | noncoding |
| 0.363766   | noncoding |
| 0.92365    | coding    |
| 1          | coding    |
| 0.0730275  | noncoding |
| 0.0730275  | noncoding |
| 0.0246552  | noncoding |
| 0.984625   | coding    |
| 0.924432   | coding    |
| 0.126089   | noncoding |
| 0.0254398  | noncoding |
| 0.999529   | coding    |
| 0.999931   | coding    |
| 0.201556   | noncoding |
| 0.176009   | noncoding |
| 0.663699   | coding    |
| 0.88565    | coding    |
| 0.57692    | coding    |
| 0.888983   | coding    |
| 0.3533     | noncoding |
| 0.155494   | noncoding |
| 0.907464   | coding    |
| 0.963782   | coding    |
| 0.0022824  | noncoding |
| 0.486687   | noncoding |
| 0.132754   | noncoding |
| 0.0622824  | noncoding |
| 1          | coding    |
| 1          | coding    |
| 0.999931   | coding    |
| 0.0388892  | noncoding |
| 1          | coding    |
| 0.997444   | coding    |
| 0.43046    | noncoding |
| 0.960776   | coding    |
| 1          | coding    |
| 0.0277755  | noncoding |

|           |           |
|-----------|-----------|
| 0.999629  | coding    |
| 0.99995   | coding    |
| 0.997306  | coding    |
| 0.997949  | coding    |
| 1         | coding    |
| 1         | coding    |
| 0.999978  | coding    |
| 1         | coding    |
| 0.0836958 | noncoding |
| 0.447542  | noncoding |
| 0.0663495 | noncoding |
| 0.0129164 | noncoding |
| 0.995199  | coding    |
| 0.49868   | noncoding |
| 0.982348  | coding    |
| 0.335505  | noncoding |
| 0.700528  | coding    |
| 0.181111  | noncoding |
| 1         | coding    |
| 0.0110692 | noncoding |
| 0.360096  | noncoding |
| 0.999518  | coding    |
| 0.279116  | noncoding |
| 0.991753  | coding    |
| 0.893004  | coding    |
| 1         | coding    |
| 1         | coding    |
| 0.978284  | coding    |
| 0.342015  | noncoding |
| 0.926249  | coding    |
| 0.353506  | noncoding |
| 0.439055  | noncoding |
| 0.361555  | noncoding |
| 0.971238  | coding    |
| 0.998501  | coding    |
| 0.0725654 | noncoding |
| 0.134596  | noncoding |
| 0.0403841 | noncoding |
| 0.999836  | coding    |
| 0.0144336 | noncoding |
| 0.889863  | coding    |
| 0.999788  | coding    |
| 0.998449  | coding    |
| 0.189143  | noncoding |
| 0.0400642 | noncoding |
| 0.0359316 | noncoding |
| 0.270723  | noncoding |
| 0.165181  | noncoding |
| 0.999959  | coding    |
| 0.996412  | coding    |



|            |           |
|------------|-----------|
| 0.926415   | coding    |
| 0.997716   | coding    |
| 0.0133438  | noncoding |
| 0.0521965  | noncoding |
| 0.979309   | coding    |
| 0.166232   | noncoding |
| 1          | coding    |
| 1          | coding    |
| 0.0169494  | noncoding |
| 0.218103   | noncoding |
| 0.0997535  | noncoding |
| 0.0872413  | noncoding |
| 0.0885357  | noncoding |
| 0.0329105  | noncoding |
| 0.99989    | coding    |
| 0.990785   | coding    |
| 0.999425   | coding    |
| 1          | coding    |
| 1          | coding    |
| 1          | coding    |
| 0.00876435 | noncoding |
| 0.898981   | coding    |
| 0.991101   | coding    |
| 1          | coding    |
| 1          | coding    |
| 0.999943   | coding    |
| 0.999389   | coding    |
| 1          | coding    |
| 0.999986   | coding    |
| 0.171883   | noncoding |
| 0.995785   | coding    |
| 1          | coding    |
| 0.99921    | coding    |
| 1          | coding    |
| 1          | coding    |
| 1          | coding    |
| 0.209567   | noncoding |
| 0.15243    | noncoding |
| 0.0198989  | noncoding |
| 0.0101761  | noncoding |
| 0.0254514  | noncoding |
| 0.97226    | coding    |
| 0.920519   | coding    |
| 0.255965   | noncoding |
| 0.0479418  | noncoding |
| 0.115958   | noncoding |
| 0.999989   | coding    |
| 0.058967   | noncoding |
| 0.0395182  | noncoding |
| 0.736342   | coding    |

|            |           |
|------------|-----------|
| 0.423162   | noncoding |
| 0.0194566  | noncoding |
| 0.16211    | noncoding |
| 0.147517   | noncoding |
| 0.0156969  | noncoding |
| 1          | coding    |
| 0.651002   | coding    |
| 0.0472625  | noncoding |
| 0.023132   | noncoding |
| 0.0306647  | noncoding |
| 0.547817   | coding    |
| 0.957332   | coding    |
| 0.549493   | coding    |
| 0.787841   | coding    |
| 0.584856   | coding    |
| 0.937858   | coding    |
| 0.0729458  | noncoding |
| 0.0603248  | noncoding |
| 0.0177702  | noncoding |
| 0.0272878  | noncoding |
| 1          | coding    |
| 1          | coding    |
| 0.0115774  | noncoding |
| 0.99976    | coding    |
| 1          | coding    |
| 0.0996056  | noncoding |
| 0.653526   | coding    |
| 1          | coding    |
| 0.28411    | noncoding |
| 0.999269   | coding    |
| 0.378819   | noncoding |
| 0.703346   | coding    |
| 0.522789   | coding    |
| 0.0646378  | noncoding |
| 0.643562   | coding    |
| 0.431866   | noncoding |
| 0.725187   | coding    |
| 1          | coding    |
| 1          | coding    |
| 0.00480539 | noncoding |
| 0.00420516 | noncoding |
| 0.0337063  | noncoding |
| 0.0119581  | noncoding |
| 0.019336   | noncoding |
| 0.11511    | noncoding |
| 0.786419   | coding    |
| 0.788137   | coding    |
| 0.0166622  | noncoding |
| 0.0500452  | noncoding |
| 0.946558   | coding    |
| 0.092192   | noncoding |
| 0.0804881  | noncoding |
| 0.999995   | coding    |
| 1          | coding    |

|            |           |
|------------|-----------|
| 1          | coding    |
| 1          | coding    |
| 1          | coding    |
| 0.768443   | coding    |
| 0.163892   | noncoding |
| 0.430987   | noncoding |
| 0.0163247  | noncoding |
| 0.999614   | coding    |
| 0.999548   | coding    |
| 0.99968    | coding    |
| 0.116735   | noncoding |
| 1          | coding    |
| 0.0455508  | noncoding |
| 0.216468   | noncoding |
| 1          | coding    |
| 1          | coding    |
| 0.0247348  | noncoding |
| 1          | coding    |
| 0.0779724  | noncoding |
| 1          | coding    |
| 0.022508   | noncoding |
| 0.0543128  | noncoding |
| 0.114604   | noncoding |
| 1          | coding    |
| 0.999182   | coding    |
| 0.0953371  | noncoding |
| 0.964862   | coding    |
| 0.0345175  | noncoding |
| 0.999791   | coding    |
| 0.282479   | noncoding |
| 1          | coding    |
| 0.047359   | noncoding |
| 0.995098   | coding    |
| 1          | coding    |
| 1          | coding    |
| 0.0552974  | noncoding |
| 0.866854   | coding    |
| 0.999998   | coding    |
| 0.0267001  | noncoding |
| 0.00436711 | noncoding |
| 0.731803   | coding    |
| 0.00508191 | noncoding |
| 0.852898   | coding    |
| 0.933662   | coding    |
| 0.963321   | coding    |
| 0.927385   | coding    |
| 0.48912    | noncoding |
| 0.973913   | coding    |

|            |           |
|------------|-----------|
| 0.872304   | coding    |
| 0.322657   | noncoding |
| 0.862039   | coding    |
| 0.296874   | noncoding |
| 0.211901   | noncoding |
| 1          | coding    |
| 0.999948   | coding    |
| 0.0760621  | noncoding |
| 1          | coding    |
| 1          | coding    |
| 1          | coding    |
| 0.96373    | coding    |
| 1          | coding    |
| 1          | coding    |
| 0.991275   | coding    |
| 0.00550373 | noncoding |
| 0.00752731 | noncoding |
| 0.0105218  | noncoding |
| 0.16029    | noncoding |
| 0.999365   | coding    |
| 0.0640238  | noncoding |
| 0.932653   | coding    |
| 0.999997   | coding    |
| 0.931843   | coding    |
| 0.999997   | coding    |
| 0.0304137  | noncoding |
| 0.999999   | coding    |
| 1          | coding    |
| 0.99999    | coding    |
| 0.999938   | coding    |
| 0.071122   | noncoding |
| 0.979355   | coding    |
| 0.307562   | noncoding |
| 0.0965722  | noncoding |
| 0.561268   | coding    |
| 0.076768   | noncoding |
| 1          | coding    |
| 0.256564   | noncoding |
| 1          | coding    |
| 0.840936   | coding    |
| 0.978116   | coding    |
| 0.999998   | coding    |
| 0.99107    | coding    |
| 0.978116   | coding    |
| 0.99991    | coding    |
| 0.999803   | coding    |
| 0.0961343  | noncoding |
| 0.373762   | noncoding |
| 1          | coding    |
| 0.502518   | coding    |
| 0.999959   | coding    |
| 0.0687962  | noncoding |
| 0.0500792  | noncoding |
| 0.0578384  | noncoding |

|           |           |
|-----------|-----------|
| 0.133625  | noncoding |
| 0.41505   | noncoding |
| 0.25203   | noncoding |
| 1         | coding    |
| 0.0909556 | noncoding |
| 0.711537  | coding    |
| 0.0389339 | noncoding |
| 0.199483  | noncoding |
| 0.0304472 | noncoding |
| 0.976084  | coding    |
| 1         | coding    |
| 1         | coding    |
| 1         | coding    |
| 0.0691163 | noncoding |
| 0.304946  | noncoding |
| 0.999955  | coding    |
| 0.558771  | coding    |
| 0.0945464 | noncoding |
| 0.201285  | noncoding |
| 0.15427   | noncoding |
| 0.0482056 | noncoding |
| 0.124742  | noncoding |
| 0.222065  | noncoding |
| 0.282624  | noncoding |
| 0.198749  | noncoding |
| 0.486461  | noncoding |
| 0.129069  | noncoding |
| 0.0743075 | noncoding |
| 0.158009  | noncoding |
| 0.867678  | coding    |
| 0.540245  | coding    |
| 0.142373  | noncoding |
| 0.485043  | noncoding |
| 0.58212   | coding    |
| 0.0651372 | noncoding |
| 0.137381  | noncoding |
| 0.0572745 | noncoding |
| 0.117272  | noncoding |
| 0.238152  | noncoding |
| 0.0344559 | noncoding |
| 0.0111362 | noncoding |
| 0.401165  | noncoding |
| 0.0852861 | noncoding |
| 0.0871466 | noncoding |
| 0.04746   | noncoding |
| 0.999997  | coding    |
| 0.0377525 | noncoding |
| 0.424111  | noncoding |
| 0.0255936 | noncoding |
| 0.016261  | noncoding |
| 0.0408265 | noncoding |

|           |           |
|-----------|-----------|
| 0.758508  | coding    |
| 0.234779  | noncoding |
| 0.649848  | coding    |
| 0.968751  | coding    |
| 1         | coding    |
| 1         | coding    |
| 0.0813863 | noncoding |
| 0.999836  | coding    |
| 0.26771   | noncoding |
| 0.0520088 | noncoding |
| 0.348224  | noncoding |
| 0.078571  | noncoding |
| 0.122495  | noncoding |
| 1         | coding    |
| 0.999996  | coding    |
| 0.180303  | noncoding |
| 1         | coding    |
| 1         | coding    |
| 0.106492  | noncoding |
| 1         | coding    |
| 1         | coding    |
| 0.0146546 | noncoding |
| 0.999997  | coding    |
| 0.905179  | coding    |
| 0.999988  | coding    |
| 1         | coding    |
| 0.824064  | coding    |
| 1         | coding    |
| 1         | coding    |
| 1         | coding    |
| 0.444682  | noncoding |
| 1         | coding    |
| 1         | coding    |
| 1         | coding    |
| 0.999998  | coding    |
| 0.999991  | coding    |
| 0.99344   | coding    |
| 0.206619  | noncoding |
| 0.999999  | coding    |
| 1         | coding    |
| 0.999996  | coding    |
| 0.999886  | coding    |
| 1         | coding    |
| 0.755127  | coding    |
| 0.986036  | coding    |
| 0.176288  | noncoding |
| 0.934893  | coding    |
| 0.67796   | coding    |
| 1         | coding    |
| 1         | coding    |
| 0.703732  | coding    |
| 1         | coding    |
| 1         | coding    |
| 1         | coding    |

|            |           |
|------------|-----------|
| 0.700309   | coding    |
| 0.999992   | coding    |
| 0.999998   | coding    |
| 1          | coding    |
| 0.469103   | noncoding |
| 0.0951791  | noncoding |
| 0.0597665  | noncoding |
| 0.10694    | noncoding |
| 0.0276464  | noncoding |
| 0.231425   | noncoding |
| 0.00578381 | noncoding |
| 0.00220501 | noncoding |
| 0.0173543  | noncoding |
| 0.0680611  | noncoding |
| 0.0352538  | noncoding |
| 0.92297    | coding    |
| 1          | coding    |
| 1          | coding    |
| 0.999997   | coding    |
| 1          | coding    |
| 1          | coding    |
| 0.150569   | noncoding |
| 0.147965   | noncoding |
| 0.697325   | coding    |
| 1          | coding    |
| 0.634185   | coding    |
| 1          | coding    |
| 0.307928   | noncoding |
| 1          | coding    |
| 1          | coding    |
| 1          | coding    |
| 0.11324    | noncoding |
| 1          | coding    |
| 0.373701   | noncoding |
| 0.0356978  | noncoding |
| 0.172027   | noncoding |
| 0.00816789 | noncoding |
| 0.0705656  | noncoding |
| 1          | coding    |
| 1          | coding    |
| 0.352479   | noncoding |
| 1          | coding    |
| 0.0403232  | noncoding |
| 0.140766   | noncoding |
| 0.244281   | noncoding |
| 0.237345   | noncoding |
| 0.079745   | noncoding |
| 1          | coding    |
| 0.0345349  | noncoding |
| 0.372613   | noncoding |
| 0.994698   | coding    |

|            |           |
|------------|-----------|
| 0.071682   | noncoding |
| 0.985466   | coding    |
| 0.969318   | coding    |
| 0.0579798  | noncoding |
| 1          | coding    |
| 1          | coding    |
| 0.0744967  | noncoding |
| 0.706285   | coding    |
| 0.503458   | coding    |
| 0.067523   | noncoding |
| 0.407377   | noncoding |
| 0.111466   | noncoding |
| 0.966399   | coding    |
| 0.998118   | coding    |
| 0.970404   | coding    |
| 0.100542   | noncoding |
| 0.911039   | coding    |
| 0.649892   | coding    |
| 1          | coding    |
| 0.240134   | noncoding |
| 0.771914   | coding    |
| 0.88598    | coding    |
| 1          | coding    |
| 0.998114   | coding    |
| 0.993616   | coding    |
| 0.0291263  | noncoding |
| 0.282696   | noncoding |
| 0.592236   | coding    |
| 0.549524   | coding    |
| 0.00697408 | noncoding |
| 0.0453843  | noncoding |
| 0.323405   | noncoding |
| 0.0178561  | noncoding |
| 0.198414   | noncoding |
| 1          | coding    |
| 0.156103   | noncoding |
| 0.0711896  | noncoding |
| 0.22213    | noncoding |
| 1          | coding    |
| 1          | coding    |
| 1          | coding    |
| 0.0112985  | noncoding |
| 0.922332   | coding    |
| 0.987678   | coding    |
| 1          | coding    |
| 0.999997   | coding    |
| 0.999999   | coding    |
| 0.999999   | coding    |
| 0.999993   | coding    |
| 0.18026    | noncoding |
| 0.0824229  | noncoding |
| 0.346009   | noncoding |
| 0.0464349  | noncoding |
| 0.40509    | noncoding |



|           |           |
|-----------|-----------|
| 0.424054  | noncoding |
| 0.424054  | noncoding |
| 0.346009  | noncoding |
| 0.043748  | noncoding |
| 0.380565  | noncoding |
| 0.897699  | coding    |
| 0.420729  | noncoding |
| 0.349226  | noncoding |
| 0.352757  | noncoding |
| 1         | coding    |
| 0.0709089 | noncoding |
| 0.0934206 | noncoding |
| 0.202258  | noncoding |
| 0.0589941 | noncoding |
| 0.13607   | noncoding |
| 0.992284  | coding    |
| 0.992635  | coding    |
| 0.998696  | coding    |
| 1         | coding    |
| 0.991247  | coding    |
| 1         | coding    |
| 0.999993  | coding    |
| 1         | coding    |
| 0.0154143 | noncoding |
| 1         | coding    |
| 0.999205  | coding    |
| 0.0119076 | noncoding |
| 0.218356  | noncoding |
| 0.118817  | noncoding |
| 0.977248  | coding    |
| 1         | coding    |
| 0.999999  | coding    |
| 1         | coding    |
| 0.654377  | coding    |
| 1         | coding    |
| 0.999999  | coding    |
| 0.209076  | noncoding |

|            |           |
|------------|-----------|
| 1          | coding    |
| 0.00674139 | noncoding |
| 0.0603862  | noncoding |
| 1          | coding    |
| 1          | coding    |
| 1          | coding    |
| 0.133962   | noncoding |
| 0.684939   | coding    |
| 0.997829   | coding    |
| 0.999867   | coding    |
| 0.999937   | coding    |
| 1          | coding    |
| 1          | coding    |
| 0.999991   | coding    |
| 0.123443   | noncoding |
| 1          | coding    |
| 1          | coding    |
| 0.999995   | coding    |
| 0.157889   | noncoding |
| 0.157889   | noncoding |
| 0.999996   | coding    |
| 1          | coding    |
| 0.104735   | noncoding |
| 0.105469   | noncoding |
| 0.305713   | noncoding |
| 1          | coding    |
| 1          | coding    |
| 0.0339907  | noncoding |
| 1          | coding    |
| 0.523493   | coding    |
| 0.157074   | noncoding |
| 0.999912   | coding    |
| 0.0605976  | noncoding |
| 0.239561   | noncoding |
| 0.0688143  | noncoding |
| 0.237497   | noncoding |
| 0.0784759  | noncoding |
| 1          | coding    |
| 1          | coding    |
| 0.217861   | noncoding |
| 1          | coding    |
| 0.0113831  | noncoding |
| 0.0446652  | noncoding |

|            |           |
|------------|-----------|
| 0.018894   | noncoding |
| 0.257515   | noncoding |
| 0.0107465  | noncoding |
| 0.0754387  | noncoding |
| 0.430791   | noncoding |
| 0.421703   | noncoding |
| 0.756958   | coding    |
| 0.0261442  | noncoding |
| 0.0324892  | noncoding |
| 0.0209792  | noncoding |
| 0.0297879  | noncoding |
| 0.0591095  | noncoding |
| 0.175463   | noncoding |
| 0.107414   | noncoding |
| 0.0886224  | noncoding |
| 0.0992326  | noncoding |
| 0.0977081  | noncoding |
| 0.107983   | noncoding |
| 0.149156   | noncoding |
| 0.13465    | noncoding |
| 0.102769   | noncoding |
| 0.0508414  | noncoding |
| 0.010385   | noncoding |
| 0.00820168 | noncoding |
| 0.0285361  | noncoding |
| 0.0708573  | noncoding |
| 0.0962642  | noncoding |
| 0.106257   | noncoding |
| 0.0750004  | noncoding |
| 0.117264   | noncoding |
| 0.148447   | noncoding |
| 0.355638   | noncoding |
| 0.191929   | noncoding |
| 0.785382   | coding    |
| 0.0306974  | noncoding |
| 1          | coding    |
| 0.0645431  | noncoding |
| 0.569709   | coding    |
| 0.104083   | noncoding |
| 0.999998   | coding    |
| 0.557371   | coding    |
| 0.997774   | coding    |
| 1          | coding    |
| 0.308371   | noncoding |
| 0.999998   | coding    |
| 0.101198   | noncoding |
| 0.529602   | coding    |
| 0.105083   | noncoding |
| 1          | coding    |
| 1          | coding    |

|           |           |
|-----------|-----------|
| 1         | coding    |
| 1         | coding    |
| 0.0825703 | noncoding |
| 0.989664  | coding    |
| 0.202218  | noncoding |
| 0.703494  | coding    |
| 0.0157127 | noncoding |
| 0.63116   | coding    |
| 0.504652  | coding    |
| 0.0329858 | noncoding |
| 0.215132  | noncoding |
| 0.0569483 | noncoding |
| 0.0820303 | noncoding |
| 0.833581  | coding    |
| 0.833581  | coding    |
| 0.839108  | coding    |
| 0.104056  | noncoding |
| 0.0749838 | noncoding |
| 0.999973  | coding    |
| 0.614902  | coding    |
| 0.0925166 | noncoding |
| 0.0445275 | noncoding |
| 1         | coding    |
| 0.999992  | coding    |
| 0.994581  | coding    |
| 0.994581  | coding    |
| 1         | coding    |
| 0.582087  | coding    |
| 1         | coding    |
| 0.194316  | noncoding |
| 0.981671  | coding    |
| 0.0139751 | noncoding |
| 0.0639004 | noncoding |
| 0.0192972 | noncoding |
| 0.0383285 | noncoding |
| 0.028608  | noncoding |
| 0.933438  | coding    |
| 0.0163783 | noncoding |
| 1         | coding    |
| 1         | coding    |
| 0.0132212 | noncoding |
| 0.991397  | coding    |
| 0.999674  | coding    |
| 0.997912  | coding    |
| 0.999202  | coding    |
| 0.999878  | coding    |
| 0.999497  | coding    |
| 0.995788  | coding    |
| 1         | coding    |
| 0.796825  | coding    |
| 0.999995  | coding    |

|           |           |
|-----------|-----------|
| 0.999782  | coding    |
| 0.966711  | coding    |
| 0.994417  | coding    |
| 0.999211  | coding    |
| 1         | coding    |
| 0.0187652 | noncoding |
| 0.148823  | noncoding |
| 0.0364592 | noncoding |
| 1         | coding    |
| 1         | coding    |
| 0.849493  | coding    |
| 0.999997  | coding    |
| 0.999992  | coding    |
| 0.100237  | noncoding |
| 0.014995  | noncoding |
| 0.471358  | noncoding |
| 0.0663676 | noncoding |
| 0.19938   | noncoding |
| 0.817198  | coding    |
| 0.16437   | noncoding |
| 0.999998  | coding    |
| 0.484259  | noncoding |
| 1         | coding    |
| 0.0181725 | noncoding |
| 0.0700467 | noncoding |
| 0.999984  | coding    |
| 0.999904  | coding    |
| 0.999995  | coding    |
| 0.255276  | noncoding |
| 0.0839726 | noncoding |
| 1         | coding    |
| 0.211398  | noncoding |
| 1         | coding    |
| 0.118288  | noncoding |
| 0.386449  | noncoding |
| 0.0443936 | noncoding |
| 0.327363  | noncoding |
| 0.170989  | noncoding |
| 0.362381  | noncoding |

|           |           |
|-----------|-----------|
| 0.147945  | noncoding |
| 0.0340056 | noncoding |
| 0.831422  | coding    |
| 1         | coding    |
| 0.557696  | coding    |
| 0.99945   | coding    |
| 0.999998  | coding    |
| 0.740555  | coding    |
| 0.999999  | coding    |
| 0.999999  | coding    |
| 0.999795  | coding    |
| 1         | coding    |
| 0.0470762 | noncoding |
| 0.171573  | noncoding |
| 0.0689141 | noncoding |
| 0.0615088 | noncoding |
| 0.999941  | coding    |
| 0.999778  | coding    |
| 0.973425  | coding    |
| 0.952058  | coding    |
| 1         | coding    |
| 0.999174  | coding    |
| 0.0325887 | noncoding |
| 0.0297917 | noncoding |
| 0.0585349 | noncoding |
| 0.175346  | noncoding |
| 0.295366  | noncoding |
| 1         | coding    |
| 1         | coding    |
| 0.327272  | noncoding |
| 1         | coding    |
| 0.489373  | noncoding |
| 1         | coding    |
| 1         | coding    |
| 0.135426  | noncoding |
| 1         | coding    |
| 1         | coding    |
| 1         | coding    |
| 0.45564   | noncoding |
| 0.137035  | noncoding |
| 0.21924   | noncoding |
| 0.99997   | coding    |
| 0.878741  | coding    |
| 0.892042  | coding    |
| 1         | coding    |
| 1         | coding    |
| 0.999956  | coding    |
| 0.0535491 | noncoding |
| 0.015244  | noncoding |
| 0.0602466 | noncoding |
| 0.999999  | coding    |

|            |           |
|------------|-----------|
| 0.0320368  | noncoding |
| 0.0532695  | noncoding |
| 0.131973   | noncoding |
| 1          | coding    |
| 0.99999    | coding    |
| 0.0755983  | noncoding |
| 0.918579   | coding    |
| 0.0340788  | noncoding |
| 0.99998    | coding    |
| 0.99998    | coding    |
| 1          | coding    |
| 0.749002   | coding    |
| 0.011095   | noncoding |
| 0.0129695  | noncoding |
| 1          | coding    |
| 0.335433   | noncoding |
| 1          | coding    |
| 0.0494234  | noncoding |
| 0.0265078  | noncoding |
| 0.313895   | noncoding |
| 0.984794   | coding    |
| 0.0397559  | noncoding |
| 0.567379   | coding    |
| 0.695931   | coding    |
| 0.82798    | coding    |
| 0.996249   | coding    |
| 0.0622523  | noncoding |
| 1          | coding    |
| 0.0596925  | noncoding |
| 0.0801146  | noncoding |
| 1          | coding    |
| 0.119219   | noncoding |
| 0.0302275  | noncoding |
| 0.0217757  | noncoding |
| 0.0183865  | noncoding |
| 0.203485   | noncoding |
| 0.2367     | noncoding |
| 1          | coding    |
| 1          | coding    |
| 0.00799122 | noncoding |
| 1          | coding    |
| 0.135204   | noncoding |
| 0.999979   | coding    |
| 1          | coding    |
| 1          | coding    |
| 0.988409   | coding    |
| 0.0980533  | noncoding |
| 0.0698375  | noncoding |
| 0.1096     | noncoding |
| 0.0541947  | noncoding |
| 0.105194   | noncoding |
| 0.0372973  | noncoding |
| 1          | coding    |
| 0.984278   | coding    |

|            |           |
|------------|-----------|
| 1          | coding    |
| 1          | coding    |
| 0.124662   | noncoding |
| 0.121921   | noncoding |
| 0.0953302  | noncoding |
| 0.0516456  | noncoding |
| 0.236493   | noncoding |
| 1          | coding    |
| 1          | coding    |
| 0.322069   | noncoding |
| 0.0553763  | noncoding |
| 0.00702025 | noncoding |
| 0.980821   | coding    |
| 0.998856   | coding    |
| 0.984786   | coding    |
| 1          | coding    |
| 0.103755   | noncoding |
| 1          | coding    |
| 0.28948    | noncoding |
| 0.99986    | coding    |
| 1          | coding    |
| 0.894308   | coding    |
| 0.11482    | noncoding |
| 0.0353797  | noncoding |
| 1          | coding    |
| 0.999985   | coding    |
| 0.999998   | coding    |
| 0.999998   | coding    |
| 0.999998   | coding    |
| 0.999955   | coding    |
| 0.999959   | coding    |
| 1          | coding    |
| 0.999191   | coding    |
| 0.966025   | coding    |
| 0.999941   | coding    |
| 1          | coding    |



|           |           |
|-----------|-----------|
| 1         | coding    |
| 0.125635  | noncoding |
| 1         | coding    |
| 1         | coding    |
| 0.027873  | noncoding |
| 0.999995  | coding    |
| 0.0690653 | noncoding |
| 0.977329  | coding    |
| 0.0285146 | noncoding |
| 0.0288291 | noncoding |
| 0.0276043 | noncoding |
| 1         | coding    |
| 1         | coding    |
| 0.148015  | noncoding |
| 1         | coding    |
| 1         | coding    |
| 0.0633819 | noncoding |
| 0.202484  | noncoding |
| 0.810571  | coding    |
| 1         | coding    |
| 0.907461  | coding    |
| 0.936417  | coding    |
| 1         | coding    |
| 0.0253795 | noncoding |
| 1         | coding    |
| 0.962667  | coding    |
| 0.995375  | coding    |
| 0.999862  | coding    |
| 1         | coding    |
| 1         | coding    |
| 0.999895  | coding    |
| 0.619871  | coding    |
| 1         | coding    |
| 0.0758798 | noncoding |
| 1         | coding    |
| 0.999999  | coding    |
| 1         | coding    |
| 0.0131044 | noncoding |
| 0.96021   | coding    |
| 0.999824  | coding    |
| 0.992955  | coding    |
| 0.999877  | coding    |
| 1         | coding    |
| 0.0846111 | noncoding |

|            |           |
|------------|-----------|
| 0.990619   | coding    |
| 1          | coding    |
| 0.967024   | coding    |
| 0.049719   | noncoding |
| 0.0770943  | noncoding |
| 0.132426   | noncoding |
| 0.121249   | noncoding |
| 0.0963468  | noncoding |
| 0.998325   | coding    |
| 0.938071   | coding    |
| 0.0177304  | noncoding |
| 0.425248   | noncoding |
| 0.97542    | coding    |
| 0.425248   | noncoding |
| 0.00758538 | noncoding |
| 0.0425133  | noncoding |
| 0.0180896  | noncoding |
| 0.00219752 | noncoding |
| 0.00622365 | noncoding |
| 0.00748703 | noncoding |
| 0.00529623 | noncoding |
| 0.0986623  | noncoding |
| 0.24108    | noncoding |
| 0.235347   | noncoding |
| 0.996791   | coding    |
| 0.934991   | coding    |
| 0.991714   | coding    |
| 0.971246   | coding    |
| 0.99385    | coding    |
| 0.973858   | coding    |
| 0.482785   | noncoding |
| 0.072074   | noncoding |
| 0.479534   | noncoding |
| 0.999637   | coding    |
| 1          | coding    |
| 0.0022532  | noncoding |
| 1          | coding    |
| 0.0382582  | noncoding |
| 0.0390531  | noncoding |
| 1          | coding    |
| 0.999917   | coding    |
| 0.999917   | coding    |
| 0.999984   | coding    |
| 0.999261   | coding    |
| 0.999988   | coding    |
| 0.999999   | coding    |
| 1          | coding    |
| 1          | coding    |
| 0.999996   | coding    |
| 0.999968   | coding    |
| 0.999999   | coding    |

|            |           |
|------------|-----------|
| 1          | coding    |
| 0.522218   | coding    |
| 1          | coding    |
| 0.241853   | noncoding |
| 0.439129   | noncoding |
| 0.288751   | noncoding |
| 1          | coding    |
| 1          | coding    |
| 0.42909    | noncoding |
| 0.0846762  | noncoding |
| 0.0362017  | noncoding |
| 0.521492   | coding    |
| 0.233175   | noncoding |
| 1          | coding    |
| 0.103638   | noncoding |
| 0.999518   | coding    |
| 1          | coding    |
| 1          | coding    |
| 1          | coding    |
| 0.00718275 | noncoding |
| 1          | coding    |
| 1          | coding    |
| 0.999074   | coding    |
| 0.176332   | noncoding |
| 1          | coding    |
| 0.0649814  | noncoding |
| 0.459788   | noncoding |
| 1          | coding    |
| 1          | coding    |
| 0.234093   | noncoding |
| 0.774402   | coding    |
| 0.997904   | coding    |
| 0.999924   | coding    |
| 0.796696   | coding    |
| 0.455072   | noncoding |
| 0.478919   | noncoding |
| 1          | coding    |
| 0.999999   | coding    |
| 0.0265721  | noncoding |
| 1          | coding    |
| 0.226558   | noncoding |
| 1          | coding    |
| 0.999984   | coding    |
| 0.999998   | coding    |
| 0.0842414  | noncoding |
| 0.0820304  | noncoding |
| 0.904837   | coding    |
| 0.0301062  | noncoding |
| 0.183147   | noncoding |
| 0.345037   | noncoding |

|            |           |
|------------|-----------|
| 0.477253   | noncoding |
| 0.178394   | noncoding |
| 0.0416491  | noncoding |
| 0.0668086  | noncoding |
| 0.134579   | noncoding |
| 0.447098   | noncoding |
| 1          | coding    |
| 0.999135   | coding    |
| 0.0447295  | noncoding |
| 0.0296835  | noncoding |
| 0.0975498  | noncoding |
| 0.101671   | noncoding |
| 0.101648   | noncoding |
| 0.0255115  | noncoding |
| 0.0683467  | noncoding |
| 0.130293   | noncoding |
| 0.0566996  | noncoding |
| 0.999832   | coding    |
| 0.0450726  | noncoding |
| 0.0382849  | noncoding |
| 0.0107833  | noncoding |
| 0.182452   | noncoding |
| 1          | coding    |
| 0.196905   | noncoding |
| 0.0141478  | noncoding |
| 1          | coding    |
| 0.314133   | noncoding |
| 1          | coding    |
| 0.0404802  | noncoding |
| 0.477761   | noncoding |
| 0.999997   | coding    |
| 0.0409088  | noncoding |
| 0.028114   | noncoding |
| 0.938284   | coding    |
| 0.00627659 | noncoding |
| 0.995839   | coding    |
| 0.999902   | coding    |
| 1          | coding    |
| 1          | coding    |
| 0.80721    | coding    |
| 0.768742   | coding    |
| 1          | coding    |
| 0.0432101  | noncoding |
| 0.0344063  | noncoding |
| 0.999963   | coding    |
| 0.106604   | noncoding |
| 0.13926    | noncoding |
| 0.998319   | coding    |
| 0.992724   | coding    |
| 0.995215   | coding    |
| 0.0475517  | noncoding |
| 0.12564    | noncoding |
| 0.999948   | coding    |
| 0.00191882 | noncoding |

|           |           |
|-----------|-----------|
| 1         | coding    |
| 0.269778  | noncoding |
| 1         | coding    |
| 0.0213842 | noncoding |
| 0.0204883 | noncoding |
| 0.999294  | coding    |
| 0.553298  | coding    |
| 1         | coding    |
| 1         | coding    |
| 0.311559  | noncoding |
| 1         | coding    |
| 1         | coding    |
| 1         | coding    |
| 0.0334252 | noncoding |
| 0.592958  | coding    |
| 0.0262381 | noncoding |
| 1         | coding    |
| 0.394155  | noncoding |
| 1         | coding    |
| 0.999989  | coding    |
| 0.951422  | coding    |
| 0.969121  | coding    |
| 0.999998  | coding    |
| 1         | coding    |
| 0.26185   | noncoding |
| 0.192927  | noncoding |
| 0.0449582 | noncoding |
| 0.772083  | coding    |
| 0.493814  | noncoding |
| 1         | coding    |
| 1         | coding    |
| 1         | coding    |
| 0.943316  | coding    |
| 1         | coding    |
| 1         | coding    |
| 1         | coding    |
| 0.0517693 | noncoding |
| 0.0655963 | noncoding |
| 0.646037  | coding    |
| 0.443144  | noncoding |
| 0.592808  | coding    |
| 0.497624  | noncoding |
| 1         | coding    |
| 0.99997   | coding    |
| 0.0674921 | noncoding |
| 0.930413  | coding    |
| 0.990872  | coding    |
| 0.0914481 | noncoding |
| 1         | coding    |
| 0.999982  | coding    |
| 1         | coding    |

|            |           |
|------------|-----------|
| 1          | coding    |
| 1          | coding    |
| 0.0830878  | noncoding |
| 1          | coding    |
| 0.98338    | coding    |
| 1          | coding    |
| 0.050455   | noncoding |
| 0.889376   | coding    |
| 0.0948667  | noncoding |
| 0.182184   | noncoding |
| 0.377705   | noncoding |
| 0.0849362  | noncoding |
| 0.551124   | coding    |
| 0.648035   | coding    |
| 0.166523   | noncoding |
| 0.491596   | noncoding |
| 0.0431077  | noncoding |
| 0.284652   | noncoding |
| 0.999851   | coding    |
| 0.727537   | coding    |
| 0.99388    | coding    |
| 0.982999   | coding    |
| 0.871085   | coding    |
| 1          | coding    |
| 1          | coding    |
| 0.00728678 | noncoding |
| 1          | coding    |
| 0.272847   | noncoding |
| 0.21867    | noncoding |
| 1          | coding    |
| 0.31892    | noncoding |
| 0.591003   | coding    |
| 0.0422367  | noncoding |
| 0.199444   | noncoding |
| 0.0933819  | noncoding |
| 0.0359609  | noncoding |
| 1          | coding    |
| 0.999994   | coding    |
| 0.999707   | coding    |
| 0.0201235  | noncoding |
| 0.286164   | noncoding |
| 0.16515    | noncoding |
| 0.999011   | coding    |
| 0.999998   | coding    |
| 1          | coding    |
| 0.999986   | coding    |
| 1          | coding    |

|           |           |
|-----------|-----------|
| 0.150558  | noncoding |
| 0.999998  | coding    |
| 1         | coding    |
| 0.99999   | coding    |
| 1         | coding    |
| 0.999995  | coding    |
| 1         | coding    |
| 1         | coding    |
| 1         | coding    |
| 0.0162639 | noncoding |
| 1         | coding    |
| 1         | coding    |
| 0.399152  | noncoding |
| 1         | coding    |
| 0.101408  | noncoding |
| 0.149124  | noncoding |
| 0.156048  | noncoding |
| 0.0589713 | noncoding |
| 0.581778  | coding    |
| 0.0444119 | noncoding |
| 0.619529  | coding    |
| 0.717528  | coding    |
| 0.13606   | noncoding |
| 0.32215   | noncoding |
| 0.889446  | coding    |
| 0.791471  | coding    |
| 0.718006  | coding    |
| 0.968249  | coding    |
| 0.691193  | coding    |
| 0.664135  | coding    |
| 0.0726073 | noncoding |
| 0.145445  | noncoding |
| 0.839848  | coding    |
| 0.991727  | coding    |
| 0.998317  | coding    |
| 0.017656  | noncoding |
| 0.139117  | noncoding |
| 0.999983  | coding    |
| 1         | coding    |
| 1         | coding    |
| 0.0209319 | noncoding |
| 0.999988  | coding    |
| 0.999999  | coding    |
| 0.999568  | coding    |
| 1         | coding    |
| 0.999998  | coding    |
| 1         | coding    |

|            |           |
|------------|-----------|
| 1          | coding    |
| 0.821386   | coding    |
| 1          | coding    |
| 0.511525   | coding    |
| 0.52664    | coding    |
| 0.237285   | noncoding |
| 0.997489   | coding    |
| 0.999959   | coding    |
| 1          | coding    |
| 0.551      | coding    |
| 1          | coding    |
| 0.979157   | coding    |
| 0.165351   | noncoding |
| 1          | coding    |
| 0.937575   | coding    |
| 0.896177   | coding    |
| 0.00630757 | noncoding |
| 1          | coding    |
| 0.0502363  | noncoding |
| 1          | coding    |
| 0.0467435  | noncoding |
| 0.823617   | coding    |
| 0.0918202  | noncoding |
| 0.689338   | coding    |
| 0.999997   | coding    |
| 0.0176656  | noncoding |
| 1          | coding    |
| 1          | coding    |
| 1          | coding    |
| 0.643219   | coding    |
| 0.426668   | noncoding |
| 0.43201    | noncoding |
| 0.581981   | coding    |
| 0.781909   | coding    |
| 1          | coding    |
| 0.999997   | coding    |
| 0.954279   | coding    |
| 1          | coding    |
| 1          | coding    |
| 1          | coding    |
| 0.104436   | noncoding |



|            |           |
|------------|-----------|
| 1          | coding    |
| 0.0374192  | noncoding |
| 0.0145095  | noncoding |
| 0.00512633 | noncoding |
| 0.0102169  | noncoding |
| 0.316172   | noncoding |
| 0.054407   | noncoding |
| 0.999091   | coding    |
| 0.055597   | noncoding |
| 1          | coding    |
| 0.453456   | noncoding |
| 0.242985   | noncoding |
| 0.135205   | noncoding |
| 1          | coding    |
| 0.999992   | coding    |
| 0.973837   | coding    |
| 0.981506   | coding    |
| 0.921503   | coding    |
| 0.335371   | noncoding |
| 1          | coding    |
| 0.165441   | noncoding |
| 0.00434792 | noncoding |
| 0.999998   | coding    |
| 0.999998   | coding    |
| 1          | coding    |
| 0.641131   | coding    |
| 1          | coding    |
| 0.721395   | coding    |
| 1          | coding    |
| 1          | coding    |
| 0.948108   | coding    |
| 1          | coding    |
| 0.999999   | coding    |
| 1          | coding    |
| 0.999192   | coding    |
| 0.0209341  | noncoding |
| 0.319594   | noncoding |

|           |           |
|-----------|-----------|
| 1         | coding    |
| 1         | coding    |
| 1         | coding    |
| 0.062334  | noncoding |
| 0.354719  | noncoding |
| 1         | coding    |
| 0.0462962 | noncoding |
| 1         | coding    |
| 1         | coding    |
| 0.575548  | coding    |
| 1         | coding    |
| 1         | coding    |
| 1         | coding    |
| 0.0136958 | noncoding |
| 1         | coding    |
| 0.865835  | coding    |
| 1         | coding    |
| 0.767089  | coding    |
| 0.999221  | coding    |
| 0.999985  | coding    |
| 1         | coding    |
| 1         | coding    |
| 0.942334  | coding    |
| 1         | coding    |
| 1         | coding    |
| 0.954979  | coding    |
| 1         | coding    |
| 0.997063  | coding    |
| 1         | coding    |
| 0.991636  | coding    |
| 0.997193  | coding    |
| 0.125388  | noncoding |
| 1         | coding    |
| 0.239546  | noncoding |
| 0.0109579 | noncoding |
| 0.116922  | noncoding |
| 0.019204  | noncoding |
| 0.999711  | coding    |
| 0.998366  | coding    |
| 0.86475   | coding    |
| 1         | coding    |
| 0.998667  | coding    |
| 1         | coding    |
| 1         | coding    |
| 1         | coding    |
| 0.0227233 | noncoding |
| 1         | coding    |
| 0.999999  | coding    |

|           |           |
|-----------|-----------|
| 1         | coding    |
| 0.997374  | coding    |
| 0.0696345 | noncoding |
| 0.999893  | coding    |
| 0.999953  | coding    |
| 1         | coding    |
| 0.558398  | coding    |
| 0.158993  | noncoding |
| 1         | coding    |
| 1         | coding    |
| 0.871432  | coding    |
| 0.277743  | noncoding |
| 0.0150309 | noncoding |
| 0.0579235 | noncoding |
| 0.120261  | noncoding |
| 1         | coding    |
| 0.214352  | noncoding |
| 0.999495  | coding    |
| 1         | coding    |
| 1         | coding    |
| 0.0275743 | noncoding |
| 0.9999    | coding    |
| 0.196407  | noncoding |
| 1         | coding    |
| 1         | coding    |
| 0.9997    | coding    |
| 1         | coding    |
| 0.997735  | coding    |
| 0.520859  | coding    |
| 0.510963  | coding    |
| 0.388991  | noncoding |
| 0.654501  | coding    |
| 1         | coding    |
| 0.999999  | coding    |
| 0.200825  | noncoding |
| 1         | coding    |
| 1         | coding    |
| 0.994091  | coding    |
| 0.360524  | noncoding |
| 0.0895835 | noncoding |
| 0.999999  | coding    |
| 0.951996  | coding    |
| 1         | coding    |

|            |           |
|------------|-----------|
| 0.0457074  | noncoding |
| 1          | coding    |
| 1          | coding    |
| 0.0258723  | noncoding |
| 0.0735874  | noncoding |
| 1          | coding    |
| 0.0243659  | noncoding |
| 0.00863893 | noncoding |
| 0.00506962 | noncoding |
| 1          | coding    |
| 0.999999   | coding    |
| 0.504685   | coding    |
| 0.999333   | coding    |
| 1          | coding    |
| 0.999993   | coding    |
| 0.999973   | coding    |
| 0.998781   | coding    |
| 0.36772    | noncoding |
| 0.218731   | noncoding |
| 0.999996   | coding    |
| 0.0293117  | noncoding |
| 0.0313938  | noncoding |
| 1          | coding    |
| 0.0229458  | noncoding |
| 0.0216577  | noncoding |
| 0.0108725  | noncoding |
| 0.136065   | noncoding |
| 0.999999   | coding    |
| 0.17213    | noncoding |
| 0.131466   | noncoding |
| 0.153972   | noncoding |
| 0.118413   | noncoding |
| 0.0495619  | noncoding |
| 1          | coding    |
| 1          | coding    |
| 0.0501964  | noncoding |
| 1          | coding    |
| 0.0533734  | noncoding |
| 0.0280488  | noncoding |
| 1          | coding    |
| 0.121443   | noncoding |
| 1          | coding    |
| 0.102321   | noncoding |
| 0.425646   | noncoding |
| 1          | coding    |
| 0.520553   | coding    |
| 1          | coding    |

[illegible]

|           |           |
|-----------|-----------|
| 1         | coding    |
| 0.998543  | coding    |
| 0.195973  | noncoding |
| 0.962018  | coding    |
| 0.999994  | coding    |
| 0.464665  | noncoding |
| 0.999618  | coding    |
| 0.0778562 | noncoding |
| 0.999722  | coding    |
| 0.999987  | coding    |
| 0.999988  | coding    |
| 0.0379191 | noncoding |
| 0.123062  | noncoding |
| 0.117242  | noncoding |
| 0.0163199 | noncoding |
| 0.211471  | noncoding |
| 1         | coding    |
| 0.169462  | noncoding |
| 0.0823371 | noncoding |
| 1         | coding    |
| 0.173231  | noncoding |
| 0.9943    | coding    |
| 1         | coding    |
| 1         | coding    |
| 0.0838367 | noncoding |
| 0.0206285 | noncoding |
| 0.0319969 | noncoding |
| 0.0424062 | noncoding |
| 0.0235074 | noncoding |
| 0.0335542 | noncoding |
| 0.181902  | noncoding |
| 0.15452   | noncoding |
| 1         | coding    |
| 0.994972  | coding    |
| 0.761713  | coding    |
| 1         | coding    |
| 0.998795  | coding    |
| 1         | coding    |

|           |           |
|-----------|-----------|
| 1         | coding    |
| 0.999495  | coding    |
| 1         | coding    |
| 0.116114  | noncoding |
| 0.99919   | coding    |
| 1         | coding    |
| 0.022966  | noncoding |
| 0.999065  | coding    |
| 1         | coding    |
| 0.020064  | noncoding |
| 0.0140698 | noncoding |
| 0.94218   | coding    |
| 1         | coding    |
| 0.982488  | coding    |
| 0.704425  | coding    |
| 0.133224  | noncoding |
| 0.0973339 | noncoding |
| 0.317829  | noncoding |
| 0.808715  | coding    |
| 0.455252  | noncoding |
| 0.313081  | noncoding |
| 0.187286  | noncoding |
| 1         | coding    |
| 0.998982  | coding    |
| 0.999784  | coding    |
| 1         | coding    |
| 1         | coding    |
| 0.169647  | noncoding |
| 0.430623  | noncoding |
| 0.999989  | coding    |
| 1         | coding    |
| 0.999598  | coding    |
| 1         | coding    |
| 0.0620505 | noncoding |
| 0.0913661 | noncoding |
| 0.0862594 | noncoding |
| 0.195207  | noncoding |
| 0.0159216 | noncoding |
| 0.13511   | noncoding |
| 1         | coding    |
| 0.695819  | coding    |
| 0.90896   | coding    |
| 0.0378216 | noncoding |
| 0.9448    | coding    |
| 0.112513  | noncoding |
| 0.216839  | noncoding |
| 0.997835  | coding    |
| 0.997862  | coding    |
| 0.110978  | noncoding |
| 0.915569  | coding    |

|            |           |
|------------|-----------|
| 0.0666345  | noncoding |
| 0.425503   | noncoding |
| 0.132387   | noncoding |
| 0.49774    | noncoding |
| 0.264912   | noncoding |
| 0.999999   | coding    |
| 1          | coding    |
| 0.114174   | noncoding |
| 0.566394   | coding    |
| 0.35184    | noncoding |
| 0.0436465  | noncoding |
| 0.0143969  | noncoding |
| 0.0835187  | noncoding |
| 1          | coding    |
| 0.0119863  | noncoding |
| 0.0268521  | noncoding |
| 0.00972953 | noncoding |
| 1          | coding    |
| 0.0719295  | noncoding |
| 0.999957   | coding    |
| 0.22074    | noncoding |
| 1          | coding    |
| 0.0528611  | noncoding |
| 1          | coding    |
| 0.170326   | noncoding |
| 0.133797   | noncoding |
| 0.0647273  | noncoding |
| 0.258461   | noncoding |
| 0.0936513  | noncoding |
| 0.150932   | noncoding |
| 0.0266111  | noncoding |
| 0.011891   | noncoding |
| 0.126613   | noncoding |
| 1          | coding    |
| 1          | coding    |
| 0.787517   | coding    |
| 0.0586222  | noncoding |
| 0.0247201  | noncoding |
| 0.0687612  | noncoding |
| 0.0136063  | noncoding |
| 0.0921983  | noncoding |
| 0.878819   | coding    |
| 0.0180482  | noncoding |
| 0.177249   | noncoding |
| 1          | coding    |
| 0.0773733  | noncoding |
| 0.0533399  | noncoding |
| 0.431516   | noncoding |
| 1          | coding    |
| 0.292835   | noncoding |



|           |           |
|-----------|-----------|
| 1         | coding    |
| 0.0739049 | noncoding |
| 0.0448478 | noncoding |
| 1         | coding    |
| 0.0974119 | noncoding |
| 1         | coding    |
| 1         | coding    |
| 0.876443  | coding    |
| 0.0193325 | noncoding |
| 1         | coding    |
| 0.999989  | coding    |
| 0.0780208 | noncoding |
| 0.999848  | coding    |
| 0.103276  | noncoding |
| 0.0492761 | noncoding |
| 1         | coding    |
| 1         | coding    |
| 0.018641  | noncoding |
| 0.999732  | coding    |
| 0.495553  | noncoding |
| 0.707601  | coding    |
| 1         | coding    |
| 1         | coding    |
| 0.0249094 | noncoding |
| 0.241196  | noncoding |
| 0.972363  | coding    |
| 0.999992  | coding    |
| 0.134734  | noncoding |
| 0.308808  | noncoding |
| 0.999963  | coding    |
| 0.944154  | coding    |
| 1         | coding    |
| 0.521051  | coding    |
| 0.999563  | coding    |
| 0.999905  | coding    |
| 0.0200305 | noncoding |
| 1         | coding    |

|           |           |
|-----------|-----------|
| 1         | coding    |
| 0.0561721 | noncoding |
| 0.683203  | coding    |
| 1         | coding    |
| 0.139444  | noncoding |
| 0.999964  | coding    |
| 0.999992  | coding    |
| 0.0159465 | noncoding |
| 0.872932  | coding    |
| 0.122933  | noncoding |
| 0.637839  | coding    |
| 0.999997  | coding    |
| 1         | coding    |
| 0.0402823 | noncoding |
| 0.141667  | noncoding |
| 0.0230543 | noncoding |
| 1         | coding    |
| 1         | coding    |
| 1         | coding    |
| 0.133339  | noncoding |
| 0.463943  | noncoding |
| 0.402278  | noncoding |
| 0.0413581 | noncoding |
| 0.402278  | noncoding |
| 0.403087  | noncoding |
| 0.17347   | noncoding |
| 0.985712  | coding    |
| 0.946376  | coding    |
| 0.0307866 | noncoding |
| 1         | coding    |
| 0.0615971 | noncoding |
| 1         | coding    |
| 0.999998  | coding    |
| 1         | coding    |
| 0.438673  | noncoding |
| 0.887377  | coding    |
| 0.533654  | coding    |
| 0.999701  | coding    |
| 0.538975  | coding    |
| 0.957514  | coding    |
| 0.442936  | noncoding |
| 0.121774  | noncoding |
| 0.0746786 | noncoding |
| 1         | coding    |
| 1         | coding    |

|           |           |
|-----------|-----------|
| 1         | coding    |
| 0.177209  | noncoding |
| 0.0596897 | noncoding |
| 0.0274325 | noncoding |
| 1         | coding    |
| 0.0242226 | noncoding |
| 0.945037  | coding    |
| 0.288084  | noncoding |
| 0.36953   | noncoding |
| 0.102399  | noncoding |
| 0.168617  | noncoding |
| 0.0968244 | noncoding |
| 0.132661  | noncoding |
| 0.206674  | noncoding |
| 1         | coding    |
| 1         | coding    |
| 1         | coding    |
| 0.996172  | coding    |
| 0.999999  | coding    |
| 1         | coding    |
| 0.0917576 | noncoding |
| 0.752252  | coding    |
| 0.910976  | coding    |
| 0.0223697 | noncoding |
| 1         | coding    |
| 1         | coding    |
| 0.0872863 | noncoding |
| 1         | coding    |
| 1         | coding    |
| 0.182987  | noncoding |
| 0.155534  | noncoding |
| 1         | coding    |
| 1         | coding    |
| 0.439808  | noncoding |
| 0.711797  | coding    |

|            |           |
|------------|-----------|
| 1          | coding    |
| 0.999997   | coding    |
| 0.999251   | coding    |
| 0.0659139  | noncoding |
| 1          | coding    |
| 1          | coding    |
| 0.999999   | coding    |
| 0.984939   | coding    |
| 1          | coding    |
| 0.0390794  | noncoding |
| 1          | coding    |
| 0.997637   | coding    |
| 0.00380336 | noncoding |
| 0.0403495  | noncoding |
| 0.362323   | noncoding |
| 0.330357   | noncoding |
| 0.355314   | noncoding |
| 0.908746   | coding    |
| 0.727809   | coding    |
| 0.34561    | noncoding |
| 0.919894   | coding    |
| 0.449476   | noncoding |
| 0.470638   | noncoding |
| 1          | coding    |
| 0.999995   | coding    |
| 0.992884   | coding    |
| 0.290971   | noncoding |
| 1          | coding    |
| 0.548935   | coding    |
| 0.999986   | coding    |
| 0.943829   | coding    |
| 0.0167166  | noncoding |
| 0.871072   | coding    |
| 0.871072   | coding    |
| 0.965291   | coding    |
| 0.937571   | coding    |
| 0.875907   | coding    |
| 0.389743   | noncoding |
| 1          | coding    |
| 0.999995   | coding    |
| 0.999975   | coding    |

|           |           |
|-----------|-----------|
| 0.999999  | coding    |
| 0.999996  | coding    |
| 0.999413  | coding    |
| 1         | coding    |
| 0.040744  | noncoding |
| 1         | coding    |
| 1         | coding    |
| 0.305908  | noncoding |
| 0.315278  | noncoding |
| 0.327747  | noncoding |
| 1         | coding    |
| 1         | coding    |
| 1         | coding    |
| 0.181291  | noncoding |
| 0.709685  | coding    |
| 0.999998  | coding    |
| 0.630082  | coding    |
| 0.40903   | noncoding |
| 0.0337631 | noncoding |
| 1         | coding    |
| 0.999999  | coding    |
| 0.743753  | coding    |
| 1         | coding    |
| 0.67951   | coding    |
| 0.073468  | noncoding |
| 0.0117649 | noncoding |
| 1         | coding    |
| 0.880927  | coding    |
| 1         | coding    |
| 0.441     | noncoding |
| 0.791608  | coding    |
| 1         | coding    |
| 0.0773699 | noncoding |
| 0.0849444 | noncoding |
| 0.999993  | coding    |
| 0.0891232 | noncoding |
| 0.0790755 | noncoding |
| 1         | coding    |
| 1         | coding    |
| 0.99996   | coding    |
| 0.195501  | noncoding |
| 0.021787  | noncoding |

|            |           |
|------------|-----------|
| 1          | coding    |
| 1          | coding    |
| 0.999996   | coding    |
| 1          | coding    |
| 1          | coding    |
| 1          | coding    |
| 0.981948   | coding    |
| 0.592217   | coding    |
| 0.751926   | coding    |
| 0.849111   | coding    |
| 1          | coding    |
| 1          | coding    |
| 1          | coding    |
| 0.0303701  | noncoding |
| 1          | coding    |
| 0.999898   | coding    |
| 0.999973   | coding    |
| 1          | coding    |
| 1          | coding    |
| 1          | coding    |
| 0.6314     | coding    |
| 1          | coding    |
| 1          | coding    |
| 0.00995906 | noncoding |
| 0.136895   | noncoding |
| 1          | coding    |
| 0.999997   | coding    |
| 0.0330556  | noncoding |
| 0.979645   | coding    |
| 0.979945   | coding    |
| 0.994117   | coding    |
| 0.23032    | noncoding |
| 0.267631   | noncoding |
| 0.0498913  | noncoding |
| 0.999712   | coding    |
| 0.990245   | coding    |
| 1          | coding    |
| 1          | coding    |
| 0.0534735  | noncoding |
| 0.117528   | noncoding |
| 0.180441   | noncoding |
| 0.353689   | noncoding |

|           |           |
|-----------|-----------|
| 0.96982   | coding    |
| 1         | coding    |
| 1         | coding    |
| 1         | coding    |
| 0.999994  | coding    |
| 0.999889  | coding    |
| 1         | coding    |
| 0.996733  | coding    |
| 0.164536  | noncoding |
| 0.999952  | coding    |
| 0.999999  | coding    |
| 1         | coding    |
| 1         | coding    |
| 0.913299  | coding    |
| 0.884109  | coding    |
| 0.360475  | noncoding |
| 0.254207  | noncoding |
| 0.56432   | coding    |
| 0.56432   | coding    |
| 0.247871  | noncoding |
| 0.491975  | noncoding |
| 0.262162  | noncoding |
| 0.247871  | noncoding |
| 0.262162  | noncoding |
| 0.263248  | noncoding |
| 0.281989  | noncoding |
| 0.173372  | noncoding |
| 0.212973  | noncoding |
| 0.191641  | noncoding |
| 0.193144  | noncoding |
| 0.369817  | noncoding |
| 0.116737  | noncoding |
| 0.112572  | noncoding |
| 0.999663  | coding    |
| 0.999999  | coding    |
| 0.119201  | noncoding |
| 1         | coding    |
| 0.467291  | noncoding |
| 1         | coding    |
| 1         | coding    |
| 1         | coding    |
| 0.061074  | noncoding |
| 0.999509  | coding    |
| 0.99998   | coding    |
| 1         | coding    |
| 1         | coding    |
| 0.0312959 | noncoding |
| 0.0851894 | noncoding |

|           |           |
|-----------|-----------|
| 0.116163  | noncoding |
| 0.057502  | noncoding |
| 1         | coding    |
| 1         | coding    |
| 1         | coding    |
| 0.0416956 | noncoding |
| 0.32946   | noncoding |
| 0.530916  | coding    |
| 0.0820689 | noncoding |
| 1         | coding    |
| 0.121639  | noncoding |
| 0.999965  | coding    |
| 0.974703  | coding    |
| 0.974324  | coding    |
| 0.130232  | noncoding |
| 0.663405  | coding    |
| 0.47525   | noncoding |
| 0.999997  | coding    |
| 0.0209486 | noncoding |
| 0.91279   | coding    |
| 0.0217642 | noncoding |
| 0.299717  | noncoding |
| 0.138091  | noncoding |
| 0.990734  | coding    |
| 0.100516  | noncoding |
| 1         | coding    |
| 0.999753  | coding    |
| 1         | coding    |
| 1         | coding    |
| 0.817935  | coding    |
| 0.684083  | coding    |
| 0.426671  | noncoding |
| 0.562904  | coding    |
| 0.139206  | noncoding |
| 1         | coding    |
| 0.0429094 | noncoding |
| 0.387855  | noncoding |
| 0.739719  | coding    |
| 0.458406  | noncoding |
| 0.0980784 | noncoding |
| 0.080059  | noncoding |
| 1         | coding    |
| 0.999729  | coding    |
| 0.999997  | coding    |
| 0.999578  | coding    |
| 1         | coding    |
| 1         | coding    |
| 0.816795  | coding    |



|            |           |
|------------|-----------|
| 1          | coding    |
| 1          | coding    |
| 0.819756   | coding    |
| 0.959337   | coding    |
| 0.0906742  | noncoding |
| 0.870394   | coding    |
| 0.808498   | coding    |
| 0.974538   | coding    |
| 0.0168571  | noncoding |
| 1          | coding    |
| 1          | coding    |
| 0.563841   | coding    |
| 1          | coding    |
| 0.102922   | noncoding |
| 0.966525   | coding    |
| 0.0990988  | noncoding |
| 0.0694471  | noncoding |
| 0.186815   | noncoding |
| 0.974017   | coding    |
| 0.974017   | coding    |
| 0.997754   | coding    |
| 1          | coding    |
| 0.141509   | noncoding |
| 0.188982   | noncoding |
| 0.999325   | coding    |
| 1          | coding    |
| 0.997592   | coding    |
| 0.00793823 | noncoding |
| 0.353453   | noncoding |
| 0.00328847 | noncoding |
| 0.00311759 | noncoding |
| 0.00324258 | noncoding |
| 0.00457985 | noncoding |
| 0.00486719 | noncoding |
| 0.00246972 | noncoding |
| 0.999999   | coding    |
| 0.00831472 | noncoding |
| 0.999942   | coding    |
| 0.956995   | coding    |
| 0.964859   | coding    |
| 0.0370093  | noncoding |
| 0.321334   | noncoding |
| 0.278131   | noncoding |
| 0.992052   | coding    |
| 0.838998   | coding    |
| 0.999999   | coding    |

|           |           |
|-----------|-----------|
| 0.999999  | coding    |
| 0.999993  | coding    |
| 1         | coding    |
| 0.461366  | noncoding |
| 0.346105  | noncoding |
| 0.298888  | noncoding |
| 0.408175  | noncoding |
| 0.886932  | coding    |
| 1         | coding    |
| 1         | coding    |
| 1         | coding    |
| 0.528703  | coding    |
| 0.349953  | noncoding |
| 1         | coding    |
| 0.015561  | noncoding |
| 0.0169163 | noncoding |
| 1         | coding    |
| 0.061236  | noncoding |
| 0.0343221 | noncoding |
| 0.850535  | coding    |
| 0.625752  | coding    |
| 0.999997  | coding    |
| 1         | coding    |
| 0.999999  | coding    |
| 0.999998  | coding    |
| 1         | coding    |
| 1         | coding    |
| 0.210453  | noncoding |
| 1         | coding    |
| 0.568471  | coding    |
| 1         | coding    |
| 0.746547  | coding    |
| 1         | coding    |
| 1         | coding    |
| 0.999807  | coding    |
| 1         | coding    |
| 0.999998  | coding    |
| 1         | coding    |

|           |           |
|-----------|-----------|
| 0.372465  | noncoding |
| 0.294887  | noncoding |
| 0.90152   | coding    |
| 0.0324248 | noncoding |
| 0.151167  | noncoding |
| 0.99994   | coding    |
| 1         | coding    |
| 0.999993  | coding    |
| 1         | coding    |
| 1         | coding    |
| 0.256384  | noncoding |
| 0.985589  | coding    |
| 0.881247  | coding    |
| 0.423535  | noncoding |
| 0.978745  | coding    |
| 0.99975   | coding    |
| 1         | coding    |
| 1         | coding    |
| 0.99227   | coding    |
| 1         | coding    |
| 0.138657  | noncoding |
| 0.184539  | noncoding |
| 0.0180545 | noncoding |
| 0.014894  | noncoding |
| 0.122639  | noncoding |
| 0.0888083 | noncoding |
| 1         | coding    |
| 1         | coding    |
| 1         | coding    |
| 0.920496  | coding    |
| 1         | coding    |
| 1         | coding    |
| 1         | coding    |
| 0.0243578 | noncoding |
| 1         | coding    |
| 0.995431  | coding    |
| 1         | coding    |
| 1         | coding    |
| 1         | coding    |
| 0.0604148 | noncoding |
| 0.962258  | coding    |
| 0.999639  | coding    |

|            |           |
|------------|-----------|
| 0.999815   | coding    |
| 0.999731   | coding    |
| 1          | coding    |
| 0.189393   | noncoding |
| 0.265338   | noncoding |
| 0.9007     | coding    |
| 0.130288   | noncoding |
| 0.0676648  | noncoding |
| 0.140569   | noncoding |
| 0.758251   | coding    |
| 0.372881   | noncoding |
| 0.239501   | noncoding |
| 1          | coding    |
| 0.0790035  | noncoding |
| 0.876391   | coding    |
| 0.050039   | noncoding |
| 1          | coding    |
| 0.222803   | noncoding |
| 0.00447831 | noncoding |
| 1          | coding    |
| 0.999954   | coding    |
| 1          | coding    |
| 0.952453   | coding    |
| 0.999961   | coding    |
| 0.995317   | coding    |
| 1          | coding    |
| 0.999732   | coding    |
| 0.0502121  | noncoding |
| 0.120448   | noncoding |
| 0.0381128  | noncoding |
| 0.794252   | coding    |
| 1          | coding    |
| 0.0360538  | noncoding |
| 0.0332766  | noncoding |
| 0.413541   | noncoding |
| 0.173367   | noncoding |
| 0.131382   | noncoding |
| 1          | coding    |
| 0.107853   | noncoding |
| 1          | coding    |
| 0.0234976  | noncoding |
| 0.0244168  | noncoding |
| 0.0786189  | noncoding |
| 0.122642   | noncoding |
| 0.322441   | noncoding |
| 0.322441   | noncoding |
| 0.0441364  | noncoding |

|           |           |
|-----------|-----------|
| 0.0628507 | noncoding |
| 0.0197274 | noncoding |
| 0.0256742 | noncoding |
| 0.999999  | coding    |
| 1         | coding    |
| 0.999999  | coding    |
| 1         | coding    |
| 0.0831749 | noncoding |
| 0.998829  | coding    |
| 1         | coding    |
| 0.096873  | noncoding |
| 1         | coding    |
| 1         | coding    |
| 0.0467806 | noncoding |
| 0.179055  | noncoding |
| 0.0117819 | noncoding |
| 0.0104532 | noncoding |
| 0.429087  | noncoding |
| 0.422276  | noncoding |
| 1         | coding    |
| 1         | coding    |
| 1         | coding    |
| 0.644086  | coding    |
| 0.565131  | coding    |
| 1         | coding    |
| 1         | coding    |
| 1         | coding    |
| 0.983733  | coding    |
| 0.965686  | coding    |
| 0.985618  | coding    |
| 0.0283813 | noncoding |
| 0.83363   | coding    |
| 0.999915  | coding    |
| 0.440559  | noncoding |
| 0.0600681 | noncoding |
| 0.999994  | coding    |
| 0.742619  | coding    |
| 0.172317  | noncoding |
| 0.304213  | noncoding |
| 0.169949  | noncoding |
| 1         | coding    |
| 0.0583332 | noncoding |
| 0.0575159 | noncoding |
| 0.0583332 | noncoding |
| 0.378924  | noncoding |
| 1         | coding    |
| 0.351148  | noncoding |
| 1         | coding    |

|           |           |
|-----------|-----------|
| 1         | coding    |
| 0.300936  | noncoding |
| 0.417435  | noncoding |
| 0.673482  | coding    |
| 0.240542  | noncoding |
| 0.514582  | coding    |
| 0.0605296 | noncoding |
| 0.224382  | noncoding |
| 0.0537766 | noncoding |
| 0.0202387 | noncoding |
| 0.0146687 | noncoding |
| 0.0393807 | noncoding |
| 0.0734137 | noncoding |
| 0.0826113 | noncoding |
| 0.0149551 | noncoding |
| 1         | coding    |
| 0.543179  | coding    |
| 0.554701  | coding    |
| 0.101513  | noncoding |
| 0.521865  | coding    |
| 1         | coding    |
| 0.99956   | coding    |
| 0.749034  | coding    |
| 1         | coding    |
| 1         | coding    |
| 0.23989   | noncoding |
| 0.179557  | noncoding |
| 0.997951  | coding    |
| 0.997133  | coding    |
| 0.999965  | coding    |
| 1         | coding    |
| 1         | coding    |
| 1         | coding    |
| 0.387842  | noncoding |
| 0.999998  | coding    |
| 0.0628619 | noncoding |
| 0.613523  | coding    |
| 0.0565906 | noncoding |
| 0.28164   | noncoding |
| 0.0692969 | noncoding |
| 0.400059  | noncoding |
| 0.0228582 | noncoding |
| 1         | coding    |
| 0.378983  | noncoding |
| 0.289157  | noncoding |
| 0.960069  | coding    |
| 0.0294128 | noncoding |
| 0.347252  | noncoding |
| 0.353663  | noncoding |

|           |           |
|-----------|-----------|
| 0.952494  | coding    |
| 1         | coding    |
| 0.999988  | coding    |
| 1         | coding    |
| 0.999842  | coding    |
| 0.0617373 | noncoding |
| 1         | coding    |
| 0.999684  | coding    |
| 0.0706955 | noncoding |
| 0.0389309 | noncoding |
| 1         | coding    |
| 0.0312344 | noncoding |
| 0.0479702 | noncoding |
| 0.034335  | noncoding |
| 0.202073  | noncoding |
| 1         | coding    |
| 1         | coding    |
| 1         | coding    |
| 0.677194  | coding    |
| 1         | coding    |
| 0.999884  | coding    |
| 0.999964  | coding    |
| 1         | coding    |
| 1         | coding    |
| 0.99985   | coding    |
| 0.381076  | noncoding |
| 0.0397104 | noncoding |
| 0.128994  | noncoding |
| 0.0448038 | noncoding |
| 0.306211  | noncoding |
| 0.973872  | coding    |
| 0.977204  | coding    |
| 0.973962  | coding    |
| 0.0217673 | noncoding |
| 1         | coding    |
| 0.999999  | coding    |
| 0.935178  | coding    |
| 1         | coding    |
| 0.76636   | coding    |

|           |           |
|-----------|-----------|
| 0.912145  | coding    |
| 0.999781  | coding    |
| 0.839037  | coding    |
| 0.999982  | coding    |
| 0.999966  | coding    |
| 0.0800826 | noncoding |
| 0.705368  | coding    |
| 0.658904  | coding    |
| 0.927304  | coding    |
| 1         | coding    |
| 0.7873    | coding    |
| 0.999999  | coding    |
| 0.999999  | coding    |
| 0.999996  | coding    |
| 0.999997  | coding    |
| 1         | coding    |
| 0.234738  | noncoding |
| 0.996809  | coding    |
| 0.997957  | coding    |
| 0.996139  | coding    |
| 0.979413  | coding    |
| 0.97149   | coding    |
| 1         | coding    |
| 1         | coding    |
| 0.999325  | coding    |
| 1         | coding    |
| 0.0569718 | noncoding |
| 0.0293106 | noncoding |
| 1         | coding    |
| 1         | coding    |
| 0.999089  | coding    |
| 0.999089  | coding    |
| 0.0866532 | noncoding |
| 0.467212  | noncoding |
| 0.988559  | coding    |
| 1         | coding    |
| 1         | coding    |
| 1         | coding    |



|           |           |
|-----------|-----------|
| 0.259005  | noncoding |
| 0.999566  | coding    |
| 1         | coding    |
| 0.281954  | noncoding |
| 1         | coding    |
| 0.92591   | coding    |
| 1         | coding    |
| 0.0748866 | noncoding |
| 1         | coding    |
| 1         | coding    |
| 0.999994  | coding    |
| 0.166645  | noncoding |
| 0.408957  | noncoding |
| 0.999999  | coding    |
| 1         | coding    |
| 0.999971  | coding    |
| 1         | coding    |
| 1         | coding    |
| 1         | coding    |
| 0.992832  | coding    |
| 0.999993  | coding    |
| 0.682523  | coding    |
| 1         | coding    |
| 0.781024  | coding    |
| 0.600508  | coding    |
| 0.999837  | coding    |
| 1         | coding    |
| 0.285971  | noncoding |
| 1         | coding    |
| 0.0238828 | noncoding |
| 0.14595   | noncoding |
| 0.658714  | coding    |
| 0.521896  | coding    |
| 1         | coding    |
| 0.99337   | coding    |
| 0.999977  | coding    |

|           |           |
|-----------|-----------|
| 1         | coding    |
| 0.992318  | coding    |
| 0.986825  | coding    |
| 0.990123  | coding    |
| 0.903285  | coding    |
| 0.999247  | coding    |
| 0.999999  | coding    |
| 1         | coding    |
| 0.999996  | coding    |
| 1         | coding    |
| 0.965779  | coding    |
| 0.0159705 | noncoding |
| 0.260926  | noncoding |
| 0.184744  | noncoding |
| 1         | coding    |
| 0.0178406 | noncoding |
| 0.250399  | noncoding |
| 0.277225  | noncoding |
| 1         | coding    |
| 1         | coding    |
| 0.131116  | noncoding |
| 1         | coding    |
| 0.0941588 | noncoding |
| 0.262672  | noncoding |
| 0.0115738 | noncoding |
| 1         | coding    |
| 1         | coding    |
| 0.0237064 | noncoding |
| 0.744449  | coding    |
| 0.0931035 | noncoding |
| 0.134705  | noncoding |
| 0.0107332 | noncoding |
| 0.999999  | coding    |
| 0.999999  | coding    |
| 0.999998  | coding    |
| 1         | coding    |
| 0.434859  | noncoding |
| 0.0446404 | noncoding |
| 0.999933  | coding    |
| 0.0195386 | noncoding |
| 1         | coding    |
| 0.103615  | noncoding |
| 0.265393  | noncoding |
| 1         | coding    |

|           |           |
|-----------|-----------|
| 0.999999  | coding    |
| 1         | coding    |
| 1         | coding    |
| 0.0563048 | noncoding |
| 0.339355  | noncoding |
| 1         | coding    |
| 1         | coding    |
| 0.0458859 | noncoding |
| 0.0466688 | noncoding |
| 1         | coding    |
| 1         | coding    |
| 0.0152847 | noncoding |
| 0.0255365 | noncoding |
| 0.999207  | coding    |
| 0.555719  | coding    |
| 0.649828  | coding    |
| 0.675565  | coding    |
| 1         | coding    |
| 0.530064  | coding    |
| 1         | coding    |
| 0.0521974 | noncoding |
| 0.0689855 | noncoding |
| 0.0672398 | noncoding |
| 0.214463  | noncoding |
| 0.999262  | coding    |
| 1         | coding    |
| 0.912776  | coding    |
| 0.989833  | coding    |
| 0.855231  | coding    |
| 0.586048  | coding    |
| 0.163116  | noncoding |
| 0.163116  | noncoding |
| 0.197607  | noncoding |
| 0.455604  | noncoding |
| 0.0979277 | noncoding |
| 1         | coding    |
| 1         | coding    |
| 0.999947  | coding    |
| 0.0930003 | noncoding |
| 0.116731  | noncoding |
| 0.999942  | coding    |
| 1         | coding    |
| 0.0205887 | noncoding |
| 0.550461  | coding    |
| 0.385485  | noncoding |

|           |           |
|-----------|-----------|
| 0.386115  | noncoding |
| 0.504216  | coding    |
| 0.386468  | noncoding |
| 0.3032    | noncoding |
| 0.139046  | noncoding |
| 0.999997  | coding    |
| 0.999998  | coding    |
| 0.0178397 | noncoding |
| 0.987653  | coding    |
| 0.814497  | coding    |
| 0.814497  | coding    |
| 0.939633  | coding    |
| 1         | coding    |
| 0.627373  | coding    |
| 0.996413  | coding    |
| 0.992912  | coding    |
| 0.204178  | noncoding |
| 1         | coding    |
| 1         | coding    |
| 1         | coding    |
| 0.958747  | coding    |
| 0.968644  | coding    |
| 0.926382  | coding    |
| 0.942783  | coding    |
| 0.535566  | coding    |
| 1         | coding    |
| 0.0518252 | noncoding |
| 0.999967  | coding    |
| 1         | coding    |
| 0.992563  | coding    |
| 0.999991  | coding    |
| 0.979183  | coding    |
| 0.140525  | noncoding |
| 1         | coding    |
| 1         | coding    |
| 0.999984  | coding    |
| 0.0433226 | noncoding |
| 1         | coding    |
| 0.999999  | coding    |
| 0.999999  | coding    |
| 0.999999  | coding    |
| 0.017512  | noncoding |
| 0.105841  | noncoding |
| 1         | coding    |
| 1         | coding    |
| 1         | coding    |
| 0.330913  | noncoding |
| 0.401527  | noncoding |
| 1         | coding    |
| 0.0316433 | noncoding |
| 1         | coding    |

[illegible]

|           |           |
|-----------|-----------|
| 0.776531  | coding    |
| 0.798693  | coding    |
| 0.10971   | noncoding |
| 0.0625784 | noncoding |
| 0.0795139 | noncoding |
| 0.0827502 | noncoding |
| 1         | coding    |
| 0.997606  | coding    |
| 0.999484  | coding    |
| 0.068705  | noncoding |
| 0.114216  | noncoding |
| 0.156886  | noncoding |
| 0.129543  | noncoding |
| 0.674756  | coding    |
| 1         | coding    |
| 1         | coding    |
| 1         | coding    |
| 0.999995  | coding    |
| 0.998669  | coding    |
| 0.999846  | coding    |
| 0.999792  | coding    |
| 0.999808  | coding    |
| 0.999773  | coding    |
| 0.999685  | coding    |
| 1         | coding    |
| 1         | coding    |
| 1         | coding    |
| 0.999974  | coding    |
| 0.40712   | noncoding |
| 0.4173    | noncoding |
| 0.374601  | noncoding |
| 0.124192  | noncoding |
| 1         | coding    |
| 1         | coding    |
| 1         | coding    |
| 0.851922  | coding    |
| 0.996341  | coding    |
| 0.986044  | coding    |
| 0.988009  | coding    |
| 0.0287193 | noncoding |
| 0.999907  | coding    |
| 0.999942  | coding    |
| 0.991413  | coding    |
| 1         | coding    |
| 0.875415  | coding    |
| 0.866266  | coding    |
| 0.1627    | noncoding |
| 1         | coding    |
| 0.99934   | coding    |
| 1         | coding    |
| 1         | coding    |

|           |           |
|-----------|-----------|
| 1         | coding    |
| 0.179376  | noncoding |
| 1         | coding    |
| 0.697985  | coding    |
| 1         | coding    |
| 0.0828882 | noncoding |
| 1         | coding    |
| 1         | coding    |
| 0.0266307 | noncoding |
| 1         | coding    |
| 0.999999  | coding    |
| 0.999999  | coding    |
| 1         | coding    |
| 0.140113  | noncoding |
| 1         | coding    |
| 1         | coding    |
| 0.0769083 | noncoding |
| 0.992793  | coding    |
| 0.999605  | coding    |
| 1         | coding    |
| 0.636436  | coding    |
| 0.110288  | noncoding |
| 0.686275  | coding    |
| 1         | coding    |
| 0.290753  | noncoding |
| 1         | coding    |
| 1         | coding    |
| 1         | coding    |
| 0.141077  | noncoding |
| 1         | coding    |
| 1         | coding    |
| 0.940151  | coding    |
| 0.0730724 | noncoding |
| 1         | coding    |
| 0.999999  | coding    |
| 1         | coding    |
| 0.883025  | coding    |
| 0.941862  | coding    |
| 1         | coding    |

|           |           |
|-----------|-----------|
| 0.605026  | coding    |
| 1         | coding    |
| 1         | coding    |
| 0.999996  | coding    |
| 1         | coding    |
| 0.938203  | coding    |
| 1         | coding    |
| 0.997115  | coding    |
| 0.963325  | coding    |
| 0.961761  | coding    |
| 0.963552  | coding    |
| 1         | coding    |
| 0.999525  | coding    |
| 0.688761  | coding    |
| 1         | coding    |
| 1         | coding    |
| 1         | coding    |
| 0.998069  | coding    |
| 0.994035  | coding    |
| 0.993078  | coding    |
| 0.999865  | coding    |
| 0.999838  | coding    |
| 0.794741  | coding    |
| 0.750429  | coding    |
| 0.693242  | coding    |
| 1         | coding    |
| 0.999984  | coding    |
| 1         | coding    |
| 0.0367982 | noncoding |
| 1         | coding    |
| 0.343061  | noncoding |
| 1         | coding    |
| 0.991458  | coding    |
| 0.799869  | coding    |
| 0.869066  | coding    |



|           |           |
|-----------|-----------|
| 0.798916  | coding    |
| 1         | coding    |
| 1         | coding    |
| 1         | coding    |
| 0.238564  | noncoding |
| 0.916095  | coding    |
| 0.930246  | coding    |
| 1         | coding    |
| 0.999998  | coding    |
| 1         | coding    |
| 1         | coding    |
| 0.286101  | noncoding |
| 1         | coding    |
| 0.995368  | coding    |
| 0.91019   | coding    |
| 1         | coding    |
| 0.103466  | noncoding |
| 0.974287  | coding    |
| 1         | coding    |
| 0.418315  | noncoding |
| 0.976315  | coding    |
| 0.999989  | coding    |
| 0.471873  | noncoding |
| 1         | coding    |
| 0.994014  | coding    |
| 0.83512   | coding    |
| 0.53074   | coding    |
| 0.51162   | coding    |
| 0.995184  | coding    |
| 0.76034   | coding    |
| 0.922004  | coding    |
| 0.861738  | coding    |
| 0.999648  | coding    |
| 0.892021  | coding    |
| 0.391663  | noncoding |
| 0.982813  | coding    |
| 0.984195  | coding    |
| 0.0621422 | noncoding |
| 0.999325  | coding    |
| 0.0542782 | noncoding |
| 0.953168  | coding    |
| 0.990314  | coding    |
| 0.682134  | coding    |
| 0.964238  | coding    |
| 0.3614    | noncoding |
| 0.357523  | noncoding |
| 0.994876  | coding    |
| 1         | coding    |
| 1         | coding    |
| 1         | coding    |
| 0.999629  | coding    |
| 1         | coding    |
| 0.023968  | noncoding |
| 0.0665735 | noncoding |

|           |           |
|-----------|-----------|
| 0.999864  | coding    |
| 0.485505  | noncoding |
| 1         | coding    |
| 0.122713  | noncoding |
| 1         | coding    |
| 1         | coding    |
| 1         | coding    |
| 0.12773   | noncoding |
| 1         | coding    |
| 0.018312  | noncoding |
| 0.0892513 | noncoding |
| 0.971739  | coding    |
| 0.998203  | coding    |
| 0.999818  | coding    |
| 0.99727   | coding    |
| 0.0256921 | noncoding |
| 0.22135   | noncoding |
| 0.240694  | noncoding |
| 1         | coding    |
| 1         | coding    |
| 0.741741  | coding    |
| 1         | coding    |
| 0.0360446 | noncoding |
| 0.402509  | noncoding |
| 1         | coding    |
| 0.403024  | noncoding |
| 1         | coding    |
| 0.200151  | noncoding |
| 1         | coding    |
| 1         | coding    |
| 1         | coding    |
| 0.406704  | noncoding |
| 1         | coding    |
| 1         | coding    |
| 1         | coding    |
| 0.0820776 | noncoding |
| 0.071773  | noncoding |
| 0.071773  | noncoding |
| 0.0813217 | noncoding |
| 0.0813217 | noncoding |
| 0.0813217 | noncoding |
| 0.0229856 | noncoding |
| 0.0273044 | noncoding |

|            |           |
|------------|-----------|
| 0.0312418  | noncoding |
| 0.0246879  | noncoding |
| 0.0233625  | noncoding |
| 0.0273044  | noncoding |
| 0.0230831  | noncoding |
| 0.577152   | coding    |
| 1          | coding    |
| 0.132375   | noncoding |
| 0.0377221  | noncoding |
| 0.0522973  | noncoding |
| 1          | coding    |
| 1          | coding    |
| 1          | coding    |
| 0.0334294  | noncoding |
| 1          | coding    |
| 0.00610733 | noncoding |
| 0.591691   | coding    |
| 0.0117697  | noncoding |
| 1          | coding    |
| 0.996221   | coding    |
| 0.692258   | coding    |
| 0.886964   | coding    |
| 0.273193   | noncoding |
| 0.0343986  | noncoding |
| 0.52507    | coding    |
| 0.477924   | noncoding |
| 1          | coding    |
| 0.999998   | coding    |
| 1          | coding    |
| 1          | coding    |
| 1          | coding    |
| 0.999953   | coding    |
| 1          | coding    |
| 0.999706   | coding    |
| 1          | coding    |
| 0.999998   | coding    |
| 0.999989   | coding    |
| 1          | coding    |
| 0.0536293  | noncoding |
| 0.999997   | coding    |

|           |           |
|-----------|-----------|
| 1         | coding    |
| 1         | coding    |
| 0.999428  | coding    |
| 0.991165  | coding    |
| 0.0388737 | noncoding |
| 0.0930169 | noncoding |
| 0.768187  | coding    |
| 0.173217  | noncoding |
| 0.020672  | noncoding |
| 0.0216027 | noncoding |
| 0.0135166 | noncoding |
| 0.909471  | coding    |
| 0.0600931 | noncoding |
| 0.0918769 | noncoding |
| 0.0478642 | noncoding |
| 0.962047  | coding    |
| 0.896196  | coding    |
| 0.038152  | noncoding |
| 0.0456264 | noncoding |
| 0.185745  | noncoding |
| 0.0257171 | noncoding |
| 1         | coding    |
| 1         | coding    |
| 1         | coding    |
| 0.0370355 | noncoding |
| 0.0323139 | noncoding |
| 0.0928974 | noncoding |
| 0.0313202 | noncoding |
| 0.0333403 | noncoding |
| 1         | coding    |
| 1         | coding    |
| 1         | coding    |
| 0.992546  | coding    |
| 0.999815  | coding    |
| 0.999916  | coding    |
| 0.728503  | coding    |
| 0.345143  | noncoding |
| 0.565241  | coding    |
| 0.521912  | coding    |
| 1         | coding    |
| 0.235495  | noncoding |
| 0.17375   | noncoding |
| 1         | coding    |
| 0.999921  | coding    |
| 1         | coding    |
| 1         | coding    |
| 1         | coding    |
| 0.373773  | noncoding |
| 1         | coding    |

|            |           |
|------------|-----------|
| 1          | coding    |
| 0.999562   | coding    |
| 0.999938   | coding    |
| 0.997922   | coding    |
| 0.0409846  | noncoding |
| 0.0459497  | noncoding |
| 1          | coding    |
| 0.0132823  | noncoding |
| 0.0149939  | noncoding |
| 1          | coding    |
| 1          | coding    |
| 1          | coding    |
| 0.998704   | coding    |
| 0.00741982 | noncoding |
| 0.0570007  | noncoding |
| 1          | coding    |
| 1          | coding    |
| 1          | coding    |
| 0.999651   | coding    |
| 0.999933   | coding    |
| 1          | coding    |
| 0.999999   | coding    |
| 0.999999   | coding    |
| 1          | coding    |
| 0.174104   | noncoding |
| 0.479837   | noncoding |
| 1          | coding    |
| 0.999867   | coding    |
| 1          | coding    |
| 1          | coding    |
| 0.335259   | noncoding |
| 0.282256   | noncoding |
| 1          | coding    |
| 0.0593171  | noncoding |
| 0.1463     | noncoding |
| 0.1463     | noncoding |
| 0.999951   | coding    |
| 0.0941809  | noncoding |
| 0.999792   | coding    |
| 0.984291   | coding    |
| 0.0554406  | noncoding |
| 0.999999   | coding    |
| 0.999984   | coding    |
| 0.999969   | coding    |
| 0.999997   | coding    |
| 0.0840081  | noncoding |
| 1          | coding    |
| 0.0406759  | noncoding |
| 0.998122   | coding    |
| 0.999974   | coding    |
| 0.999991   | coding    |

|            |           |
|------------|-----------|
| 0.995356   | coding    |
| 0.205624   | noncoding |
| 0.108445   | noncoding |
| 0.971694   | coding    |
| 1          | coding    |
| 1          | coding    |
| 0.999995   | coding    |
| 1          | coding    |
| 0.999997   | coding    |
| 0.999999   | coding    |
| 0.999999   | coding    |
| 0.999822   | coding    |
| 1          | coding    |
| 0.999995   | coding    |
| 0.999993   | coding    |
| 0.625949   | coding    |
| 0.624285   | coding    |
| 0.179135   | noncoding |
| 0.31132    | noncoding |
| 1          | coding    |
| 1          | coding    |
| 0.10163    | noncoding |
| 0.99523    | coding    |
| 0.958766   | coding    |
| 0.928537   | coding    |
| 1          | coding    |
| 0.0488034  | noncoding |
| 0.99796    | coding    |
| 0.744461   | coding    |
| 1          | coding    |
| 1          | coding    |
| 0.171433   | noncoding |
| 0.0179848  | noncoding |
| 1          | coding    |
| 0.996816   | coding    |
| 0.914822   | coding    |
| 0.00966858 | noncoding |
| 1          | coding    |
| 0.0612324  | noncoding |
| 1          | coding    |
| 1          | coding    |
| 0.0312515  | noncoding |
| 0.104707   | noncoding |
| 1          | coding    |
| 0.999998   | coding    |
| 0.760069   | coding    |
| 0.762274   | coding    |
| 1          | coding    |
| 1          | coding    |
| 0.615989   | coding    |
| 0.916772   | coding    |

|           |           |
|-----------|-----------|
| 0.635794  | coding    |
| 0.630408  | coding    |
| 0.925787  | coding    |
| 0.999812  | coding    |
| 0.336008  | noncoding |
| 0.0785635 | noncoding |
| 0.308982  | noncoding |
| 0.31395   | noncoding |
| 0.162475  | noncoding |
| 0.0317219 | noncoding |
| 0.635794  | coding    |
| 0.128563  | noncoding |
| 0.182158  | noncoding |
| 0.0336518 | noncoding |
| 0.173515  | noncoding |
| 1         | coding    |
| 0.999996  | coding    |
| 1         | coding    |
| 0.999999  | coding    |
| 1         | coding    |
| 0.201282  | noncoding |
| 0.462398  | noncoding |
| 0.024423  | noncoding |
| 0.0110469 | noncoding |
| 0.027669  | noncoding |
| 0.0178635 | noncoding |
| 0.131697  | noncoding |
| 0.725286  | coding    |
| 0.0599116 | noncoding |
| 0.172267  | noncoding |
| 0.563398  | coding    |
| 0.996121  | coding    |
| 0.506329  | coding    |
| 0.506329  | coding    |
| 0.913361  | coding    |
| 0.990073  | coding    |
| 0.470757  | noncoding |
| 1         | coding    |
| 0.0273416 | noncoding |
| 0.0307781 | noncoding |
| 0.073559  | noncoding |
| 0.149491  | noncoding |
| 1         | coding    |
| 0.0211823 | noncoding |
| 0.0209512 | noncoding |
| 0.191903  | noncoding |

|            |           |
|------------|-----------|
| 0.0473217  | noncoding |
| 0.995571   | coding    |
| 1          | coding    |
| 0.996603   | coding    |
| 0.99997    | coding    |
| 1          | coding    |
| 1          | coding    |
| 1          | coding    |
| 0.00400636 | noncoding |
| 0.107546   | noncoding |
| 0.829444   | coding    |
| 1          | coding    |
| 1          | coding    |
| 0.04794    | noncoding |
| 0.974742   | coding    |
| 1          | coding    |
| 0.140456   | noncoding |
| 0.21194    | noncoding |
| 0.162874   | noncoding |
| 1          | coding    |
| 0.994264   | coding    |
| 0.999885   | coding    |
| 0.2228     | noncoding |
| 1          | coding    |
| 1          | coding    |
| 1          | coding    |
| 0.038999   | noncoding |
| 0.132377   | noncoding |
| 1          | coding    |
| 0.157421   | noncoding |
| 0.174208   | noncoding |
| 0.170254   | noncoding |
| 0.950398   | coding    |
| 0.952814   | coding    |
| 0.957878   | coding    |
| 0.865756   | coding    |
| 0.884419   | coding    |
| 0.868854   | coding    |
| 1          | coding    |
| 0.992817   | coding    |



[illegible]

|            |           |
|------------|-----------|
| 0.00596969 | noncoding |
| 0.994183   | coding    |
| 0.142349   | noncoding |
| 0.0261873  | noncoding |
| 0.109795   | noncoding |
| 0.16688    | noncoding |
| 1          | coding    |
| 0.51784    | coding    |
| 0.324403   | noncoding |
| 0.0808772  | noncoding |
| 0.999993   | coding    |
| 0.739991   | coding    |
| 0.999566   | coding    |
| 0.0363909  | noncoding |
| 1          | coding    |
| 1          | coding    |
| 0.959135   | coding    |
| 0.66715    | coding    |
| 0.48628    | noncoding |
| 1          | coding    |
| 0.999426   | coding    |
| 0.999919   | coding    |
| 0.998565   | coding    |
| 0.999882   | coding    |
| 0.967649   | coding    |
| 0.0111775  | noncoding |
| 0.996959   | coding    |
| 0.054485   | noncoding |
| 0.160156   | noncoding |
| 1          | coding    |
| 0.988456   | coding    |
| 0.0683357  | noncoding |
| 0.688878   | coding    |
| 0.856242   | coding    |
| 0.338974   | noncoding |
| 1          | coding    |
| 1          | coding    |
| 0.796301   | coding    |
| 0.017065   | noncoding |
| 0.110765   | noncoding |
| 0.997173   | coding    |
| 1          | coding    |
| 0.999432   | coding    |
| 0.997008   | coding    |
| 0.153968   | noncoding |
| 1          | coding    |
| 0.487985   | noncoding |

|           |           |
|-----------|-----------|
| 0.88676   | coding    |
| 0.999991  | coding    |
| 0.171068  | noncoding |
| 1         | coding    |
| 0.997573  | coding    |
| 1         | coding    |
| 1         | coding    |
| 0.977501  | coding    |
| 1         | coding    |
| 1         | coding    |
| 1         | coding    |
| 0.999992  | coding    |
| 0.999974  | coding    |
| 1         | coding    |
| 0.0571334 | noncoding |
| 0.999992  | coding    |
| 0.999992  | coding    |
| 1         | coding    |
| 1         | coding    |
| 0.146669  | noncoding |
| 0.0703538 | noncoding |
| 0.999997  | coding    |
| 0.999995  | coding    |
| 0.999995  | coding    |
| 0.998024  | coding    |
| 0.999999  | coding    |
| 0.0638904 | noncoding |
| 0.419122  | noncoding |
| 0.119495  | noncoding |
| 1         | coding    |
| 0.353271  | noncoding |
| 0.991855  | coding    |
| 0.273131  | noncoding |
| 0.708158  | coding    |
| 0.625967  | coding    |
| 0.15448   | noncoding |
| 1         | coding    |
| 0.864442  | coding    |
| 0.935684  | coding    |
| 0.996793  | coding    |
| 0.0785568 | noncoding |
| 0.999997  | coding    |
| 0.999652  | coding    |
| 0.484981  | noncoding |
| 0.195529  | noncoding |
| 1         | coding    |
| 1         | coding    |

|           |           |
|-----------|-----------|
| 1         | coding    |
| 1         | coding    |
| 0.0319123 | noncoding |
| 0.202682  | noncoding |
| 1         | coding    |
| 1         | coding    |
| 0.91386   | coding    |
| 1         | coding    |
| 0.889044  | coding    |
| 0.67228   | coding    |
| 0.766845  | coding    |
| 0.773377  | coding    |
| 0.999898  | coding    |
| 0.999735  | coding    |
| 0.997545  | coding    |
| 1         | coding    |
| 0.928897  | coding    |
| 0.867399  | coding    |
| 1         | coding    |
| 0.897649  | coding    |
| 1         | coding    |
| 1         | coding    |
| 0.118278  | noncoding |
| 1         | coding    |
| 0.0531536 | noncoding |
| 0.92744   | coding    |
| 0.999998  | coding    |
| 0.929828  | coding    |
| 0.833171  | coding    |
| 0.826586  | coding    |
| 0.833171  | coding    |
| 0.833171  | coding    |
| 0.981961  | coding    |
| 1         | coding    |
| 0.3299    | noncoding |
| 0.999188  | coding    |
| 1         | coding    |
| 0.994712  | coding    |
| 1         | coding    |
| 0.999987  | coding    |

|            |           |
|------------|-----------|
| 1          | coding    |
| 0.0293504  | noncoding |
| 0.00770471 | noncoding |
| 1          | coding    |
| 0.936076   | coding    |
| 0.916901   | coding    |
| 0.953597   | coding    |
| 0.539111   | coding    |
| 0.980426   | coding    |
| 0.993304   | coding    |
| 0.999994   | coding    |
| 0.999998   | coding    |
| 0.0732051  | noncoding |
| 0.994081   | coding    |
| 0.993401   | coding    |
| 0.999996   | coding    |
| 1          | coding    |
| 0.1579     | noncoding |
| 0.156352   | noncoding |
| 0.576236   | coding    |
| 0.0525093  | noncoding |
| 0.395621   | noncoding |
| 0.308295   | noncoding |
| 1          | coding    |
| 1          | coding    |
| 1          | coding    |
| 0.433604   | noncoding |
| 0.0549375  | noncoding |
| 0.940903   | coding    |
| 0.995417   | coding    |
| 1          | coding    |
| 0.798869   | coding    |
| 0.999979   | coding    |
| 0.374676   | noncoding |
| 0.889821   | coding    |
| 0.0521173  | noncoding |
| 0.0343956  | noncoding |
| 0.991693   | coding    |
| 1          | coding    |
| 1          | coding    |
| 0.97387    | coding    |
| 0.885605   | coding    |
| 0.739948   | coding    |

|           |           |
|-----------|-----------|
| 0.574642  | coding    |
| 0.936005  | coding    |
| 0.849446  | coding    |
| 0.966668  | coding    |
| 0.931443  | coding    |
| 0.960556  | coding    |
| 1         | coding    |
| 0.999997  | coding    |
| 1         | coding    |
| 0.946354  | coding    |
| 0.177627  | noncoding |
| 0.318887  | noncoding |
| 0.558552  | coding    |
| 0.967431  | coding    |
| 0.241023  | noncoding |
| 1         | coding    |
| 0.999655  | coding    |
| 0.129264  | noncoding |
| 0.0230267 | noncoding |
| 0.0298435 | noncoding |
| 0.0527408 | noncoding |
| 0.268213  | noncoding |
| 0.353185  | noncoding |
| 0.0215994 | noncoding |
| 0.0693914 | noncoding |
| 0.142598  | noncoding |
| 0.955348  | coding    |
| 0.040542  | noncoding |
| 0.524951  | coding    |
| 0.831697  | coding    |
| 0.655591  | coding    |
| 0.62951   | coding    |
| 0.978231  | coding    |
| 0.285616  | noncoding |
| 0.139761  | noncoding |
| 0.986927  | coding    |
| 1         | coding    |
| 1         | coding    |
| 1         | coding    |
| 0.93478   | coding    |
| 1         | coding    |
| 1         | coding    |
| 1         | coding    |
| 0.999424  | coding    |
| 0.946127  | coding    |
| 0.999424  | coding    |
| 0.999424  | coding    |
| 0.999512  | coding    |
| 0.999424  | coding    |
| 0.0733339 | noncoding |
| 0.144448  | noncoding |
| 0.392111  | noncoding |
| 1         | coding    |
| 1         | coding    |

|           |           |
|-----------|-----------|
| 1         | coding    |
| 0.999972  | coding    |
| 0.512534  | coding    |
| 1         | coding    |
| 0.03401   | noncoding |
| 0.0480962 | noncoding |
| 1         | coding    |
| 1         | coding    |
| 0.928285  | coding    |
| 0.807498  | coding    |
| 0.994781  | coding    |
| 1         | coding    |
| 1         | coding    |
| 0.999998  | coding    |
| 1         | coding    |
| 1         | coding    |
| 0.22956   | noncoding |
| 0.0561069 | noncoding |
| 0.404295  | noncoding |
| 0.0159722 | noncoding |
| 0.355778  | noncoding |
| 1         | coding    |
| 1         | coding    |
| 0.954356  | coding    |
| 0.976604  | coding    |
| 0.982803  | coding    |
| 0.941938  | coding    |
| 0.902581  | coding    |
| 0.576996  | coding    |
| 0.499326  | noncoding |
| 0.956515  | coding    |
| 0.146453  | noncoding |
| 0.883246  | coding    |
| 0.999996  | coding    |
| 0.999081  | coding    |
| 0.0547352 | noncoding |
| 0.181452  | noncoding |
| 0.296625  | noncoding |
| 0.325091  | noncoding |
| 1         | coding    |
| 0.60609   | coding    |
| 1         | coding    |
| 1         | coding    |
| 0.0170939 | noncoding |
| 1         | coding    |

|           |           |
|-----------|-----------|
| 0.999966  | coding    |
| 0.983714  | coding    |
| 1         | coding    |
| 0.737723  | coding    |
| 1         | coding    |
| 0.16286   | noncoding |
| 0.160208  | noncoding |
| 0.164372  | noncoding |
| 0.16086   | noncoding |
| 0.161745  | noncoding |
| 0.790422  | coding    |
| 0.45497   | noncoding |
| 1         | coding    |
| 1         | coding    |
| 0.206485  | noncoding |
| 0.999415  | coding    |
| 0.999993  | coding    |
| 1         | coding    |
| 1         | coding    |
| 0.999999  | coding    |
| 0.9999    | coding    |
| 0.997786  | coding    |
| 0.938637  | coding    |
| 0.999931  | coding    |
| 0.999337  | coding    |
| 0.999941  | coding    |
| 0.999218  | coding    |
| 0.999999  | coding    |
| 0.999841  | coding    |
| 0.306723  | noncoding |
| 0.313143  | noncoding |
| 1         | coding    |
| 0.899496  | coding    |
| 1         | coding    |
| 0.0235089 | noncoding |
| 1         | coding    |
| 1         | coding    |
| 0.0876576 | noncoding |
| 1         | coding    |
| 0.119584  | noncoding |
| 1         | coding    |
| 0.999905  | coding    |
| 1         | coding    |
| 1         | coding    |
| 1         | coding    |



|           |           |
|-----------|-----------|
| 1         | coding    |
| 1         | coding    |
| 0.999954  | coding    |
| 0.320782  | noncoding |
| 0.99793   | coding    |
| 0.983624  | coding    |
| 0.992432  | coding    |
| 0.983979  | coding    |
| 0.984795  | coding    |
| 0.0969119 | noncoding |
| 0.0224909 | noncoding |
| 1         | coding    |
| 0.999995  | coding    |
| 0.698009  | coding    |
| 0.983823  | coding    |
| 1         | coding    |
| 0.999997  | coding    |
| 1         | coding    |
| 0.959994  | coding    |
| 1         | coding    |
| 1         | coding    |
| 0.0255885 | noncoding |
| 1         | coding    |
| 0.0179411 | noncoding |
| 1         | coding    |
| 0.917622  | coding    |
| 0.811984  | coding    |
| 0.49201   | noncoding |
| 0.0126073 | noncoding |
| 1         | coding    |
| 0.0811299 | noncoding |
| 0.244448  | noncoding |
| 1         | coding    |
| 0.999935  | coding    |
| 1         | coding    |

|           |           |
|-----------|-----------|
| 0.999828  | coding    |
| 1         | coding    |
| 0.995806  | coding    |
| 1         | coding    |
| 1         | coding    |
| 0.760928  | coding    |
| 1         | coding    |
| 0.999485  | coding    |
| 0.999762  | coding    |
| 0.996707  | coding    |
| 1         | coding    |
| 0.220437  | noncoding |
| 1         | coding    |
| 0.999934  | coding    |
| 0.384293  | noncoding |
| 1         | coding    |
| 1         | coding    |
| 0.061139  | noncoding |
| 0.24308   | noncoding |
| 0.0428629 | noncoding |
| 0.99611   | coding    |
| 0.904023  | coding    |
| 0.995217  | coding    |
| 1         | coding    |
| 1         | coding    |
| 0.881512  | coding    |
| 0.999986  | coding    |
| 1         | coding    |
| 1         | coding    |
| 1         | coding    |
| 0.369827  | noncoding |
| 0.999999  | coding    |
| 0.0819401 | noncoding |
| 0.534294  | coding    |
| 1         | coding    |
| 0.0170598 | noncoding |
| 0.027263  | noncoding |
| 1         | coding    |
| 1         | coding    |
| 0.999443  | coding    |
| 0.999828  | coding    |
| 0.999957  | coding    |
| 0.999991  | coding    |
| 0.216336  | noncoding |
| 1         | coding    |
| 0.144822  | noncoding |
| 1         | coding    |
| 0.969921  | coding    |

|            |           |
|------------|-----------|
| 0.913378   | coding    |
| 0.98564    | coding    |
| 0.999961   | coding    |
| 0.786456   | coding    |
| 1          | coding    |
| 0.0125092  | noncoding |
| 0.040336   | noncoding |
| 0.999999   | coding    |
| 0.999999   | coding    |
| 1          | coding    |
| 1          | coding    |
| 1          | coding    |
| 0.999999   | coding    |
| 0.999976   | coding    |
| 1          | coding    |
| 0.999998   | coding    |
| 1          | coding    |
| 1          | coding    |
| 0.999999   | coding    |
| 0.999693   | coding    |
| 0.41894    | noncoding |
| 0.160831   | noncoding |
| 0.297398   | noncoding |
| 1          | coding    |
| 0.00859308 | noncoding |
| 0.999906   | coding    |
| 0.930818   | coding    |
| 1          | coding    |
| 1          | coding    |
| 0.998143   | coding    |
| 1          | coding    |
| 1          | coding    |
| 0.853915   | coding    |
| 1          | coding    |
| 0.016436   | noncoding |
| 0.0164993  | noncoding |
| 0.994556   | coding    |
| 0.217143   | noncoding |
| 0.29624    | noncoding |
| 1          | coding    |
| 0.285276   | noncoding |
| 0.034233   | noncoding |
| 0.0827708  | noncoding |
| 0.0850993  | noncoding |
| 0.0895605  | noncoding |
| 0.99853    | coding    |
| 0.999154   | coding    |
| 0.010546   | noncoding |
| 1          | coding    |

|           |           |
|-----------|-----------|
| 1         | coding    |
| 0.999999  | coding    |
| 0.535898  | coding    |
| 0.363809  | noncoding |
| 1         | coding    |
| 0.0843716 | noncoding |
| 0.247162  | noncoding |
| 0.660113  | coding    |
| 0.354091  | noncoding |
| 0.218101  | noncoding |
| 1         | coding    |
| 0.999955  | coding    |
| 0.999923  | coding    |
| 0.996903  | coding    |
| 0.0525246 | noncoding |
| 0.999241  | coding    |
| 1         | coding    |
| 0.999971  | coding    |
| 0.999738  | coding    |
| 0.998412  | coding    |
| 0.996065  | coding    |
| 0.838876  | coding    |
| 0.885225  | coding    |
| 0.0606025 | noncoding |
| 1         | coding    |
| 0.0459714 | noncoding |
| 0.99841   | coding    |
| 0.0493967 | noncoding |
| 0.0367765 | noncoding |
| 0.999992  | coding    |
| 0.977254  | coding    |

|           |           |
|-----------|-----------|
| 0.986458  | coding    |
| 0.343329  | noncoding |
| 0.0761915 | noncoding |
| 0.999996  | coding    |
| 0.99999   | coding    |
| 1         | coding    |
| 0.989712  | coding    |
| 1         | coding    |
| 0.999959  | coding    |
| 0.999496  | coding    |
| 0.999444  | coding    |
| 0.997972  | coding    |
| 0.020917  | noncoding |
| 1         | coding    |
| 0.725597  | coding    |
| 0.11368   | noncoding |
| 0.0674241 | noncoding |
| 0.0631787 | noncoding |
| 0.0764226 | noncoding |
| 0.0695654 | noncoding |
| 1         | coding    |
| 1         | coding    |
| 0.998966  | coding    |
| 1         | coding    |
| 1         | coding    |
| 1         | coding    |
| 0.522135  | coding    |
| 1         | coding    |
| 1         | coding    |
| 0.904644  | coding    |
| 1         | coding    |
| 0.998338  | coding    |
| 0.894311  | coding    |
| 1         | coding    |
| 0.215137  | noncoding |
| 0.999971  | coding    |
| 0.999998  | coding    |
| 1         | coding    |

|           |           |
|-----------|-----------|
| 1         | coding    |
| 0.999996  | coding    |
| 0.499667  | noncoding |
| 1         | coding    |
| 1         | coding    |
| 0.832022  | coding    |
| 1         | coding    |
| 0.121968  | noncoding |
| 1         | coding    |
| 1         | coding    |
| 0.979112  | coding    |
| 1         | coding    |
| 1         | coding    |
| 1         | coding    |
| 0.999956  | coding    |
| 1         | coding    |
| 0.0578278 | noncoding |
| 0.780594  | coding    |
| 0.0873514 | noncoding |
| 0.0824783 | noncoding |
| 0.258434  | noncoding |
| 0.99999   | coding    |
| 0.885114  | coding    |
| 0.997571  | coding    |
| 0.0693212 | noncoding |
| 0.0399035 | noncoding |
| 0.995662  | coding    |
| 0.940847  | coding    |
| 0.0977265 | noncoding |
| 1         | coding    |
| 1         | coding    |
| 1         | coding    |
| 0.982061  | coding    |
| 0.135601  | noncoding |
| 0.0673545 | noncoding |
| 1         | coding    |
| 0.187209  | noncoding |
| 1         | coding    |
| 0.99725   | coding    |
| 0.369919  | noncoding |
| 0.368338  | noncoding |
| 0.997989  | coding    |
| 0.537615  | coding    |
| 0.935627  | coding    |
| 0.597774  | coding    |
| 0.674905  | coding    |
| 0.694532  | coding    |
| 0.999997  | coding    |

|            |           |
|------------|-----------|
| 1          | coding    |
| 1          | coding    |
| 1          | coding    |
| 0.98362    | coding    |
| 1          | coding    |
| 0.918138   | coding    |
| 0.936168   | coding    |
| 1          | coding    |
| 1          | coding    |
| 0.1148     | noncoding |
| 0.148246   | noncoding |
| 0.885544   | coding    |
| 0.999934   | coding    |
| 1          | coding    |
| 0.945841   | coding    |
| 0.993786   | coding    |
| 0.846968   | coding    |
| 0.15683    | noncoding |
| 1          | coding    |
| 0.997708   | coding    |
| 0.18084    | noncoding |
| 0.00360055 | noncoding |
| 0.01184    | noncoding |
| 1          | coding    |
| 1          | coding    |
| 0.0310468  | noncoding |
| 0.387308   | noncoding |
| 1          | coding    |
| 0.163298   | noncoding |
| 1          | coding    |
| 0.999999   | coding    |
| 0.0418207  | noncoding |
| 0.783792   | coding    |
| 0.761163   | coding    |
| 0.783792   | coding    |
| 0.100192   | noncoding |
| 0.0297531  | noncoding |
| 0.170469   | noncoding |
| 0.999985   | coding    |
| 0.0571341  | noncoding |
| 1          | coding    |
| 1          | coding    |
| 1          | coding    |
| 0.99894    | coding    |
| 0.999578   | coding    |
| 0.999673   | coding    |
| 0.221338   | noncoding |
| 0.999817   | coding    |
| 0.944813   | coding    |
| 0.872751   | coding    |

|           |           |
|-----------|-----------|
| 0.943429  | coding    |
| 0.380731  | noncoding |
| 0.820515  | coding    |
| 0.999374  | coding    |
| 0.999977  | coding    |
| 1         | coding    |
| 1         | coding    |
| 1         | coding    |
| 0.999724  | coding    |
| 0.0175732 | noncoding |
| 1         | coding    |
| 1         | coding    |
| 1         | coding    |
| 0.183388  | noncoding |
| 0.999983  | coding    |
| 0.0847513 | noncoding |
| 0.235287  | noncoding |
| 0.258592  | noncoding |
| 0.0810306 | noncoding |
| 0.0117825 | noncoding |
| 0.0329848 | noncoding |
| 0.133807  | noncoding |
| 0.131841  | noncoding |
| 1         | coding    |
| 0.156102  | noncoding |
| 0.0653867 | noncoding |
| 1         | coding    |
| 0.181265  | noncoding |
| 0.0356934 | noncoding |
| 0.963164  | coding    |
| 0.153483  | noncoding |
| 0.223185  | noncoding |
| 0.219264  | noncoding |
| 0.224029  | noncoding |
| 1         | coding    |
| 1         | coding    |
| 0.179046  | noncoding |
| 0.215605  | noncoding |
| 0.0841194 | noncoding |
| 0.941737  | coding    |
| 1         | coding    |
| 0.0221391 | noncoding |
| 0.975649  | coding    |
| 0.99458   | coding    |
| 0.0152926 | noncoding |
| 0.0535787 | noncoding |
| 0.0187239 | noncoding |
| 0.0379531 | noncoding |
| 0.543927  | coding    |
| 1         | coding    |
| 0.736444  | coding    |
| 0.176126  | noncoding |
| 0.0697464 | noncoding |
| 0.2572    | noncoding |



|            |           |
|------------|-----------|
| 1          | coding    |
| 0.197679   | noncoding |
| 1          | coding    |
| 1          | coding    |
| 1          | coding    |
| 0.168711   | noncoding |
| 0.0487179  | noncoding |
| 1          | coding    |
| 0.987496   | coding    |
| 1          | coding    |
| 1          | coding    |
| 1          | coding    |
| 0.0175668  | noncoding |
| 1          | coding    |
| 0.991994   | coding    |
| 1          | coding    |
| 1          | coding    |
| 1          | coding    |
| 0.0324282  | noncoding |
| 1          | coding    |
| 1          | coding    |
| 0.999673   | coding    |
| 0.999566   | coding    |
| 0.00329718 | noncoding |
| 0.0180111  | noncoding |
| 0.972099   | coding    |
| 0.607461   | coding    |
| 0.0559271  | noncoding |
| 1          | coding    |
| 0.196011   | noncoding |
| 0.99783    | coding    |
| 1          | coding    |
| 1          | coding    |
| 0.157632   | noncoding |
| 1          | coding    |
| 0.294891   | noncoding |
| 0.472315   | noncoding |
| 0.205861   | noncoding |
| 0.140916   | noncoding |
| 1          | coding    |
| 1          | coding    |
| 0.274564   | noncoding |
| 0.999981   | coding    |
| 1          | coding    |
| 0.963725   | coding    |
| 0.990061   | coding    |
| 1          | coding    |
| 1          | coding    |

|           |           |
|-----------|-----------|
| 0.029104  | noncoding |
| 1         | coding    |
| 0.014191  | noncoding |
| 0.861503  | coding    |
| 0.123424  | noncoding |
| 1         | coding    |
| 0.129776  | noncoding |
| 0.61196   | coding    |
| 0.60653   | coding    |
| 0.0667214 | noncoding |
| 0.999978  | coding    |
| 1         | coding    |
| 1         | coding    |
| 1         | coding    |
| 0.0300779 | noncoding |
| 0.999915  | coding    |
| 1         | coding    |
| 1         | coding    |
| 1         | coding    |
| 0.147548  | noncoding |
| 0.9814    | coding    |
| 0.999997  | coding    |
| 0.198369  | noncoding |
| 0.998515  | coding    |
| 0.103675  | noncoding |
| 0.999955  | coding    |
| 1         | coding    |
| 0.313969  | noncoding |
| 0.599757  | coding    |
| 0.999995  | coding    |
| 1         | coding    |
| 1         | coding    |
| 0.0188651 | noncoding |
| 0.0345001 | noncoding |
| 0.999875  | coding    |
| 1         | coding    |
| 1         | coding    |
| 0.991882  | coding    |
| 0.824102  | coding    |
| 0.974571  | coding    |
| 0.973436  | coding    |
| 0.66257   | coding    |
| 0.997059  | coding    |
| 0.687806  | coding    |
| 0.082153  | noncoding |
| 0.835311  | coding    |
| 0.887361  | coding    |
| 0.0330535 | noncoding |
| 0.990024  | coding    |
| 0.786637  | coding    |

|           |           |
|-----------|-----------|
| 0.972354  | coding    |
| 0.990024  | coding    |
| 0.425373  | noncoding |
| 0.969198  | coding    |
| 0.405984  | noncoding |
| 0.449372  | noncoding |
| 0.025641  | noncoding |
| 0.39637   | noncoding |
| 0.188732  | noncoding |
| 0.0667972 | noncoding |
| 0.0191047 | noncoding |
| 0.0202794 | noncoding |
| 0.159751  | noncoding |
| 0.195101  | noncoding |
| 0.243409  | noncoding |
| 0.131435  | noncoding |
| 0.0892448 | noncoding |
| 0.301217  | noncoding |
| 0.298675  | noncoding |
| 0.31046   | noncoding |
| 1         | coding    |
| 0.999998  | coding    |
| 1         | coding    |
| 0.032029  | noncoding |
| 0.198687  | noncoding |
| 0.359293  | noncoding |
| 0.0268735 | noncoding |
| 0.110675  | noncoding |
| 1         | coding    |
| 0.999998  | coding    |
| 0.999998  | coding    |
| 1         | coding    |
| 0.206645  | noncoding |
| 1         | coding    |
| 0.425647  | noncoding |
| 1         | coding    |
| 0.963016  | coding    |
| 1         | coding    |
| 0.008783  | noncoding |
| 1         | coding    |
| 1         | coding    |
| 1         | coding    |

|            |           |
|------------|-----------|
| 0.0931315  | noncoding |
| 0.0109699  | noncoding |
| 0.012718   | noncoding |
| 0.468838   | noncoding |
| 0.632262   | coding    |
| 0.97279    | coding    |
| 0.99926    | coding    |
| 0.350819   | noncoding |
| 0.372763   | noncoding |
| 1          | coding    |
| 0.0261468  | noncoding |
| 0.106107   | noncoding |
| 0.398472   | noncoding |
| 0.79217    | coding    |
| 0.0227162  | noncoding |
| 0.174302   | noncoding |
| 0.999949   | coding    |
| 0.0348634  | noncoding |
| 1          | coding    |
| 0.10625    | noncoding |
| 0.0332704  | noncoding |
| 0.011068   | noncoding |
| 0.154303   | noncoding |
| 0.0442033  | noncoding |
| 0.999881   | coding    |
| 0.962584   | coding    |
| 0.985062   | coding    |
| 0.622538   | coding    |
| 1          | coding    |
| 0.157804   | noncoding |
| 0.173287   | noncoding |
| 0.0671664  | noncoding |
| 0.0760118  | noncoding |
| 0.176501   | noncoding |
| 0.0389416  | noncoding |
| 0.486596   | noncoding |
| 0.234115   | noncoding |
| 1          | coding    |
| 0.999634   | coding    |
| 1          | coding    |
| 0.0172798  | noncoding |
| 0.00379275 | noncoding |
| 0.0203849  | noncoding |
| 0.00639527 | noncoding |
| 0.0180631  | noncoding |
| 0.336541   | noncoding |
| 0.0735777  | noncoding |

|           |           |
|-----------|-----------|
| 0.976101  | coding    |
| 0.551059  | coding    |
| 0.0250719 | noncoding |
| 0.016509  | noncoding |
| 0.999981  | coding    |
| 0.0560204 | noncoding |
| 0.700852  | coding    |
| 0.999724  | coding    |
| 1         | coding    |
| 1         | coding    |
| 0.755798  | coding    |
| 0.880253  | coding    |
| 0.999987  | coding    |
| 1         | coding    |
| 1         | coding    |
| 0.0602111 | noncoding |
| 0.062601  | noncoding |
| 0.795777  | coding    |
| 0.0774109 | noncoding |
| 0.0139947 | noncoding |
| 0.0137924 | noncoding |
| 0.0628768 | noncoding |
| 1         | coding    |
| 0.561695  | coding    |
| 1         | coding    |
| 0.157548  | noncoding |
| 1         | coding    |
| 1         | coding    |
| 0.449755  | noncoding |
| 0.999998  | coding    |
| 0.773242  | coding    |
| 0.635208  | coding    |
| 0.0182205 | noncoding |
| 1         | coding    |
| 0.0267696 | noncoding |
| 0.0385025 | noncoding |
| 0.549935  | coding    |
| 0.863988  | coding    |
| 0.0107193 | noncoding |
| 1         | coding    |
| 1         | coding    |
| 0.493714  | noncoding |
| 0.246129  | noncoding |
| 0.0568618 | noncoding |
| 0.227329  | noncoding |
| 0.830586  | coding    |
| 0.945718  | coding    |
| 0.223268  | noncoding |
| 0.66139   | coding    |
| 0.66139   | coding    |
| 0.165221  | noncoding |
| 1         | coding    |
| 1         | coding    |
| 1         | coding    |

|           |           |
|-----------|-----------|
| 1         | coding    |
| 0.328382  | noncoding |
| 0.96778   | coding    |
| 0.777378  | coding    |
| 0.142357  | noncoding |
| 0.0512475 | noncoding |
| 0.615186  | coding    |
| 0.0501539 | noncoding |
| 0.522297  | coding    |
| 0.031874  | noncoding |
| 0.17153   | noncoding |
| 0.14407   | noncoding |
| 0.992174  | coding    |
| 0.995589  | coding    |
| 0.84242   | coding    |
| 0.98582   | coding    |
| 0.201869  | noncoding |
| 0.0345074 | noncoding |
| 0.346266  | noncoding |
| 0.166607  | noncoding |
| 0.119976  | noncoding |
| 1         | coding    |
| 1         | coding    |
| 0.806761  | coding    |
| 0.569949  | coding    |
| 0.999866  | coding    |
| 1         | coding    |
| 0.999909  | coding    |
| 0.999986  | coding    |
| 0.0237516 | noncoding |
| 0.0403803 | noncoding |
| 0.999991  | coding    |
| 1         | coding    |
| 0.0609744 | noncoding |
| 0.223074  | noncoding |
| 0.361627  | noncoding |
| 0.845666  | coding    |
| 1         | coding    |
| 0.156657  | noncoding |
| 0.703987  | coding    |
| 1         | coding    |
| 0.0425118 | noncoding |
| 0.244839  | noncoding |
| 0.273934  | noncoding |
| 0.126745  | noncoding |
| 0.169923  | noncoding |
| 0.662211  | coding    |
| 0.617907  | coding    |

|           |           |
|-----------|-----------|
| 0.416782  | noncoding |
| 0.741524  | coding    |
| 0.10333   | noncoding |
| 0.430386  | noncoding |
| 0.520581  | coding    |
| 1         | coding    |
| 0.0889787 | noncoding |
| 0.993855  | coding    |
| 1         | coding    |
| 0.999651  | coding    |
| 0.995888  | coding    |
| 0.121114  | noncoding |
| 0.240212  | noncoding |
| 0.165876  | noncoding |
| 0.271669  | noncoding |
| 0.0637916 | noncoding |
| 0.655704  | coding    |
| 1         | coding    |
| 0.425795  | noncoding |
| 1         | coding    |
| 0.622982  | coding    |
| 0.988929  | coding    |
| 0.171792  | noncoding |
| 0.0098702 | noncoding |
| 0.0912411 | noncoding |
| 0.0391805 | noncoding |
| 0.646722  | coding    |
| 0.514767  | coding    |
| 0.514767  | coding    |
| 0.492737  | noncoding |
| 0.644512  | coding    |
| 0.417221  | noncoding |
| 0.428986  | noncoding |
| 0.444868  | noncoding |
| 0.428986  | noncoding |
| 0.452595  | noncoding |
| 0.99925   | coding    |
| 0.940841  | coding    |
| 1         | coding    |
| 0.0686449 | noncoding |
| 0.0577165 | noncoding |
| 0.117931  | noncoding |
| 0.869274  | coding    |
| 0.348748  | noncoding |
| 0.977495  | coding    |

|           |           |
|-----------|-----------|
| 1         | coding    |
| 0.197337  | noncoding |
| 0.145757  | noncoding |
| 0.155648  | noncoding |
| 0.0450475 | noncoding |
| 0.983535  | coding    |
| 0.981499  | coding    |
| 0.921034  | coding    |
| 0.957509  | coding    |
| 0.93656   | coding    |
| 1         | coding    |
| 0.0153792 | noncoding |
| 0.215415  | noncoding |
| 1         | coding    |
| 0.0751097 | noncoding |
| 0.029186  | noncoding |
| 0.0252679 | noncoding |
| 0.021196  | noncoding |
| 0.416605  | noncoding |
| 0.265567  | noncoding |
| 1         | coding    |
| 0.766811  | coding    |
| 1         | coding    |
| 0.99997   | coding    |
| 0.0629339 | noncoding |
| 0.371403  | noncoding |
| 1         | coding    |
| 0.804631  | coding    |
| 0.367753  | noncoding |
| 1         | coding    |
| 0.245864  | noncoding |
| 0.186183  | noncoding |
| 1         | coding    |
| 0.999997  | coding    |
| 1         | coding    |
| 0.0336953 | noncoding |
| 0.104197  | noncoding |
| 0.998983  | coding    |
| 0.126864  | noncoding |
| 0.135806  | noncoding |
| 0.0417667 | noncoding |



|           |           |
|-----------|-----------|
| 0.855379  | coding    |
| 0.0609328 | noncoding |
| 1         | coding    |
| 0.0240692 | noncoding |
| 0.929193  | coding    |
| 0.747929  | coding    |
| 0.0638965 | noncoding |
| 0.97648   | coding    |
| 0.969905  | coding    |
| 0.999678  | coding    |
| 1         | coding    |
| 0.411272  | noncoding |
| 0.0662408 | noncoding |
| 0.99984   | coding    |
| 0.999968  | coding    |
| 0.999984  | coding    |
| 1         | coding    |
| 0.999967  | coding    |
| 0.999997  | coding    |
| 0.999268  | coding    |
| 0.205445  | noncoding |
| 0.0911809 | noncoding |
| 0.268104  | noncoding |
| 1         | coding    |
| 0.179066  | noncoding |
| 1         | coding    |
| 0.134061  | noncoding |
| 0.0587656 | noncoding |
| 0.698678  | coding    |
| 0.972736  | coding    |
| 1         | coding    |
| 0.103177  | noncoding |
| 1         | coding    |
| 0.879869  | coding    |
| 0.992209  | coding    |
| 0.969258  | coding    |
| 0.461967  | noncoding |
| 0.186645  | noncoding |
| 0.720604  | coding    |
| 0.104291  | noncoding |
| 0.338123  | noncoding |
| 0.986622  | coding    |
| 1         | coding    |
| 0.0689544 | noncoding |
| 0.188271  | noncoding |
| 0.656165  | coding    |
| 0.637197  | coding    |
| 0.840531  | coding    |
| 0.982041  | coding    |
| 0.997806  | coding    |
| 0.867531  | coding    |

|            |           |
|------------|-----------|
| 0.725662   | coding    |
| 0.590912   | coding    |
| 1          | coding    |
| 1          | coding    |
| 0.0947237  | noncoding |
| 0.0518648  | noncoding |
| 0.636349   | coding    |
| 0.00826509 | noncoding |
| 0.89678    | coding    |
| 0.268824   | noncoding |
| 0.0242901  | noncoding |
| 0.1772     | noncoding |
| 0.128395   | noncoding |
| 0.241573   | noncoding |
| 0.0124553  | noncoding |
| 0.320611   | noncoding |
| 0.169655   | noncoding |
| 0.265445   | noncoding |
| 1          | coding    |
| 1          | coding    |
| 0.948153   | coding    |
| 1          | coding    |
| 0.999934   | coding    |
| 0.857986   | coding    |
| 0.999883   | coding    |
| 1          | coding    |
| 0.161783   | noncoding |
| 0.180516   | noncoding |
| 0.111204   | noncoding |
| 0.376869   | noncoding |
| 0.0861204  | noncoding |
| 0.113968   | noncoding |
| 0.0272893  | noncoding |
| 0.0121609  | noncoding |
| 0.257921   | noncoding |
| 0.0111722  | noncoding |
| 1          | coding    |
| 1          | coding    |
| 1          | coding    |
| 0.325831   | noncoding |
| 0.623958   | coding    |
| 0.630788   | coding    |
| 0.0950082  | noncoding |

|            |           |
|------------|-----------|
| 0.996064   | coding    |
| 0.130896   | noncoding |
| 0.409727   | noncoding |
| 0.421429   | noncoding |
| 0.866183   | coding    |
| 0.156722   | noncoding |
| 1          | coding    |
| 0.0774508  | noncoding |
| 0.111851   | noncoding |
| 0.999981   | coding    |
| 0.382109   | noncoding |
| 1          | coding    |
| 0.999996   | coding    |
| 1          | coding    |
| 0.291067   | noncoding |
| 0.999993   | coding    |
| 0.0307298  | noncoding |
| 0.70411    | coding    |
| 0.00943442 | noncoding |
| 1          | coding    |
| 0.0232319  | noncoding |
| 0.0171434  | noncoding |
| 0.361809   | noncoding |
| 0.295911   | noncoding |
| 1          | coding    |
| 0.153151   | noncoding |
| 0.165918   | noncoding |
| 0.106707   | noncoding |
| 0.0340536  | noncoding |
| 0.0386861  | noncoding |
| 0.0226676  | noncoding |
| 0.999957   | coding    |
| 1          | coding    |
| 0.112571   | noncoding |
| 0.00635593 | noncoding |
| 1          | coding    |
| 0.143394   | noncoding |
| 0.145571   | noncoding |
| 0.120448   | noncoding |
| 0.112307   | noncoding |
| 0.027629   | noncoding |
| 0.0242581  | noncoding |
| 0.073924   | noncoding |
| 1          | coding    |
| 0.999923   | coding    |
| 1          | coding    |
| 1          | coding    |
| 1          | coding    |

|           |           |
|-----------|-----------|
| 0.997817  | coding    |
| 0.0528599 | noncoding |
| 0.114173  | noncoding |
| 0.650637  | coding    |
| 0.59769   | coding    |
| 0.129974  | noncoding |
| 0.956853  | coding    |
| 0.272068  | noncoding |
| 0.788855  | coding    |
| 1         | coding    |
| 1         | coding    |
| 1         | coding    |
| 0.616816  | coding    |
| 0.947711  | coding    |
| 0.999998  | coding    |
| 0.997485  | coding    |
| 0.134474  | noncoding |
| 1         | coding    |
| 0.999168  | coding    |
| 0.999995  | coding    |
| 0.999995  | coding    |
| 0.0559424 | noncoding |
| 0.344915  | noncoding |
| 0.0529266 | noncoding |
| 0.802743  | coding    |
| 0.120717  | noncoding |
| 0.907946  | coding    |
| 0.238912  | noncoding |
| 0.999086  | coding    |
| 0.999739  | coding    |
| 0.0726174 | noncoding |
| 0.708131  | coding    |
| 0.877691  | coding    |
| 0.0252513 | noncoding |
| 0.0219518 | noncoding |
| 1         | coding    |
| 1         | coding    |
| 1         | coding    |
| 0.0181165 | noncoding |
| 0.0486137 | noncoding |
| 0.0210541 | noncoding |
| 0.10027   | noncoding |
| 0.999536  | coding    |
| 1         | coding    |
| 0.135342  | noncoding |
| 0.977635  | coding    |
| 0.157253  | noncoding |

|            |           |
|------------|-----------|
| 0.462795   | noncoding |
| 0.999997   | coding    |
| 0.301628   | noncoding |
| 0.00874233 | noncoding |
| 0.189467   | noncoding |
| 0.287263   | noncoding |
| 0.0222645  | noncoding |
| 0.548055   | coding    |
| 0.619843   | coding    |
| 1          | coding    |
| 0.999856   | coding    |
| 0.0945449  | noncoding |
| 0.821605   | coding    |
| 0.25113    | noncoding |
| 0.0216258  | noncoding |
| 0.0250768  | noncoding |
| 0.0135035  | noncoding |
| 0.115948   | noncoding |
| 0.0145394  | noncoding |
| 0.0598102  | noncoding |
| 0.0215172  | noncoding |
| 1          | coding    |
| 0.149584   | noncoding |
| 0.98386    | coding    |
| 0.674094   | coding    |
| 0.999278   | coding    |
| 0.0771546  | noncoding |
| 0.130428   | noncoding |
| 0.904478   | coding    |
| 0.73087    | coding    |
| 0.555694   | coding    |
| 0.875046   | coding    |
| 0.0166136  | noncoding |
| 0.123213   | noncoding |
| 0.223975   | noncoding |
| 0.700648   | coding    |
| 0.0367698  | noncoding |
| 0.130591   | noncoding |
| 0.532504   | coding    |
| 0.549161   | coding    |
| 0.798457   | coding    |

|           |           |
|-----------|-----------|
| 0.650777  | coding    |
| 0.786119  | coding    |
| 1         | coding    |
| 1         | coding    |
| 1         | coding    |
| 0.151914  | noncoding |
| 1         | coding    |
| 0.499474  | noncoding |
| 0.827766  | coding    |
| 1         | coding    |
| 0.999999  | coding    |
| 1         | coding    |
| 1         | coding    |
| 1         | coding    |
| 0.0449652 | noncoding |
| 0.999892  | coding    |
| 1         | coding    |
| 1         | coding    |
| 1         | coding    |
| 0.179568  | noncoding |
| 0.0606628 | noncoding |
| 0.0388952 | noncoding |
| 0.0705975 | noncoding |
| 0.774437  | coding    |
| 0.105124  | noncoding |
| 0.855775  | coding    |
| 0.870477  | coding    |
| 0.964613  | coding    |
| 0.0368321 | noncoding |
| 1         | coding    |
| 0.978952  | coding    |
| 0.386459  | noncoding |
| 1         | coding    |
| 1         | coding    |
| 0.052211  | noncoding |
| 1         | coding    |
| 1         | coding    |
| 1         | coding    |
| 0.283541  | noncoding |

|            |           |
|------------|-----------|
| 1          | coding    |
| 1          | coding    |
| 0.121483   | noncoding |
| 0.230271   | noncoding |
| 0.377665   | noncoding |
| 0.901231   | coding    |
| 0.220002   | noncoding |
| 0.0176578  | noncoding |
| 0.985749   | coding    |
| 0.972845   | coding    |
| 0.25588    | noncoding |
| 1          | coding    |
| 0.0220188  | noncoding |
| 1          | coding    |
| 0.0272793  | noncoding |
| 0.0180251  | noncoding |
| 0.309105   | noncoding |
| 0.0409868  | noncoding |
| 0.259491   | noncoding |
| 1          | coding    |
| 1          | coding    |
| 0.999998   | coding    |
| 1          | coding    |
| 0.999997   | coding    |
| 0.99999    | coding    |
| 0.957694   | coding    |
| 0.179204   | noncoding |
| 0.0758299  | noncoding |
| 1          | coding    |
| 1          | coding    |
| 0.999996   | coding    |
| 0.999937   | coding    |
| 1          | coding    |
| 0.999794   | coding    |
| 0.99997    | coding    |
| 0.927282   | coding    |
| 0.0719338  | noncoding |
| 0.00971239 | noncoding |
| 0.0117092  | noncoding |
| 1          | coding    |
| 0.0356166  | noncoding |
| 0.0857912  | noncoding |
| 0.980373   | coding    |
| 0.973897   | coding    |
| 0.878761   | coding    |
| 0.914752   | coding    |
| 0.962012   | coding    |

|           |           |
|-----------|-----------|
| 0.974835  | coding    |
| 0.115115  | noncoding |
| 0.999989  | coding    |
| 0.999998  | coding    |
| 0.139763  | noncoding |
| 1         | coding    |
| 0.992991  | coding    |
| 0.994383  | coding    |
| 0.992752  | coding    |
| 0.138611  | noncoding |
| 0.115954  | noncoding |
| 1         | coding    |
| 0.980467  | coding    |
| 1         | coding    |
| 1         | coding    |
| 1         | coding    |
| 0.972845  | coding    |
| 0.544443  | coding    |
| 0.0816591 | noncoding |
| 0.654393  | coding    |
| 1         | coding    |
| 1         | coding    |
| 1         | coding    |
| 0.328921  | noncoding |
| 0.775322  | coding    |
| 0.373439  | noncoding |
| 1         | coding    |
| 1         | coding    |
| 1         | coding    |
| 0.139562  | noncoding |
| 1         | coding    |
| 1         | coding    |
| 0.99919   | coding    |
| 0.999127  | coding    |
| 0.909608  | coding    |
| 1         | coding    |
| 1         | coding    |
| 1         | coding    |
| 0.0176498 | noncoding |
| 0.171692  | noncoding |
| 1         | coding    |
| 1         | coding    |
| 1         | coding    |
| 0.166565  | noncoding |
| 0.0764248 | noncoding |
| 0.999968  | coding    |
| 0.105619  | noncoding |
| 1         | coding    |
| 0.276209  | noncoding |
| 0.732993  | coding    |
| 0.0447508 | noncoding |
| 1         | coding    |
| 1         | coding    |
| 0.0356107 | noncoding |



|           |           |
|-----------|-----------|
| 0.982448  | coding    |
| 0.997352  | coding    |
| 0.945651  | coding    |
| 1         | coding    |
| 0.548157  | coding    |
| 0.996342  | coding    |
| 1         | coding    |
| 0.162946  | noncoding |
| 0.215787  | noncoding |
| 0.997981  | coding    |
| 0.999436  | coding    |
| 0.999245  | coding    |
| 0.702494  | coding    |
| 1         | coding    |
| 0.254765  | noncoding |
| 0.422666  | noncoding |
| 0.167601  | noncoding |
| 0.167601  | noncoding |
| 0.162364  | noncoding |
| 0.274124  | noncoding |
| 0.125036  | noncoding |
| 0.153388  | noncoding |
| 0.0762306 | noncoding |
| 0.969558  | coding    |
| 0.122304  | noncoding |
| 0.0792635 | noncoding |
| 0.793182  | coding    |
| 0.992581  | coding    |
| 0.12385   | noncoding |
| 0.150367  | noncoding |
| 1         | coding    |
| 0.0790716 | noncoding |
| 1         | coding    |
| 0.0777633 | noncoding |
| 0.999991  | coding    |
| 1         | coding    |
| 1         | coding    |
| 0.0380176 | noncoding |
| 0.998986  | coding    |
| 0.999352  | coding    |
| 0.0406469 | noncoding |
| 0.31925   | noncoding |
| 0.02994   | noncoding |
| 0.132208  | noncoding |
| 0.0240429 | noncoding |
| 0.327998  | noncoding |
| 0.999999  | coding    |
| 0.0481695 | noncoding |
| 0.281856  | noncoding |
| 0.690928  | coding    |
| 0.0579468 | noncoding |

|           |           |
|-----------|-----------|
| 0.0375796 | noncoding |
| 0.151001  | noncoding |
| 0.0847396 | noncoding |
| 0.0184442 | noncoding |
| 0.174291  | noncoding |
| 0.407827  | noncoding |
| 0.18263   | noncoding |
| 0.999969  | coding    |
| 1         | coding    |
| 0.0847196 | noncoding |
| 0.0531013 | noncoding |
| 0.0219823 | noncoding |
| 0.997998  | coding    |
| 0.0598808 | noncoding |
| 0.212727  | noncoding |
| 0.121802  | noncoding |
| 0.997353  | coding    |
| 0.186947  | noncoding |
| 0.333786  | noncoding |
| 0.498744  | noncoding |
| 1         | coding    |
| 0.396679  | noncoding |
| 1         | coding    |
| 0.32129   | noncoding |
| 0.822999  | coding    |
| 0.309868  | noncoding |
| 1         | coding    |
| 0.755582  | coding    |
| 1         | coding    |
| 1         | coding    |
| 0.999998  | coding    |
| 1         | coding    |
| 0.999993  | coding    |
| 1         | coding    |

|           |           |
|-----------|-----------|
| 0.054332  | noncoding |
| 1         | coding    |
| 0.999966  | coding    |
| 0.07763   | noncoding |
| 0.999902  | coding    |
| 0.635931  | coding    |
| 0.898043  | coding    |
| 1         | coding    |
| 0.999818  | coding    |
| 0.89466   | coding    |
| 1         | coding    |
| 0.0567325 | noncoding |
| 1         | coding    |
| 1         | coding    |
| 1         | coding    |
| 0.997131  | coding    |
| 0.294119  | noncoding |
| 0.01615   | noncoding |
| 1         | coding    |
| 0.983855  | coding    |
| 0.0220691 | noncoding |
| 0.999939  | coding    |
| 0.98688   | coding    |
| 0.999987  | coding    |
| 0.226146  | noncoding |
| 1         | coding    |
| 0.849915  | coding    |
| 0.999997  | coding    |
| 0.827193  | coding    |
| 0.14694   | noncoding |
| 1         | coding    |
| 0.999962  | coding    |
| 0.999912  | coding    |
| 0.999906  | coding    |
| 0.999912  | coding    |
| 1         | coding    |
| 1         | coding    |
| 1         | coding    |
| 0.631845  | coding    |
| 0.0432532 | noncoding |
| 0.040321  | noncoding |
| 1         | coding    |
| 0.530662  | coding    |
| 0.387458  | noncoding |
| 0.518532  | coding    |
| 1         | coding    |
| 0.165021  | noncoding |
| 1         | coding    |
| 0.0158314 | noncoding |
| 0.0155187 | noncoding |

[illegible]

|           |           |
|-----------|-----------|
| 1         | coding    |
| 1         | coding    |
| 0.999645  | coding    |
| 1         | coding    |
| 0.223101  | noncoding |
| 1         | coding    |
| 0.142599  | noncoding |
| 0.999998  | coding    |
| 0.368772  | noncoding |
| 0.40907   | noncoding |
| 0.290934  | noncoding |
| 0.31064   | noncoding |
| 0.670423  | coding    |
| 0.249561  | noncoding |
| 0.117409  | noncoding |
| 0.5557    | coding    |
| 1         | coding    |
| 0.265799  | noncoding |
| 0.0315895 | noncoding |
| 0.793455  | coding    |
| 0.139608  | noncoding |
| 1         | coding    |
| 0.99993   | coding    |
| 0.334808  | noncoding |
| 1         | coding    |
| 0.22745   | noncoding |
| 0.178651  | noncoding |
| 1         | coding    |
| 0.472721  | noncoding |
| 0.941125  | coding    |
| 0.999644  | coding    |
| 0.0123105 | noncoding |
| 0.0131426 | noncoding |
| 0.0422752 | noncoding |
| 0.116296  | noncoding |
| 0.101276  | noncoding |
| 0.658929  | coding    |
| 0.0834162 | noncoding |
| 1         | coding    |
| 0.408289  | noncoding |
| 1         | coding    |
| 1         | coding    |
| 0.0472056 | noncoding |
| 1         | coding    |
| 1         | coding    |
| 0.0387231 | noncoding |
| 0.0438302 | noncoding |
| 0.0508326 | noncoding |
| 0.998775  | coding    |

|           |           |
|-----------|-----------|
| 0.0613972 | noncoding |
| 0.168289  | noncoding |
| 1         | coding    |
| 1         | coding    |
| 1         | coding    |
| 0.996534  | coding    |
| 0.0138745 | noncoding |
| 0.306445  | noncoding |
| 0.412181  | noncoding |
| 0.0522446 | noncoding |
| 0.0906235 | noncoding |
| 0.0123154 | noncoding |
| 0.0723733 | noncoding |
| 0.590747  | coding    |
| 0.228857  | noncoding |
| 0.143611  | noncoding |
| 0.10273   | noncoding |
| 0.145398  | noncoding |
| 0.116266  | noncoding |
| 0.993348  | coding    |
| 0.0443811 | noncoding |
| 0.414632  | noncoding |
| 0.610227  | coding    |
| 0.763223  | coding    |
| 0.121545  | noncoding |
| 1         | coding    |
| 0.0953667 | noncoding |
| 0.690042  | coding    |
| 0.116697  | noncoding |
| 1         | coding    |
| 0.999999  | coding    |
| 0.82617   | coding    |
| 0.771183  | coding    |
| 1         | coding    |
| 0.943957  | coding    |
| 1         | coding    |
| 1         | coding    |
| 0.592443  | coding    |
| 0.083487  | noncoding |
| 0.401924  | noncoding |
| 0.108529  | noncoding |
| 1         | coding    |
| 0.777579  | coding    |
| 0.0179923 | noncoding |
| 0.106329  | noncoding |
| 0.707044  | coding    |
| 0.760702  | coding    |
| 0.76243   | coding    |
| 0.119341  | noncoding |
| 0.199913  | noncoding |
| 0.199913  | noncoding |
| 0.208773  | noncoding |
| 0.0988997 | noncoding |
| 0.0792002 | noncoding |

|           |           |
|-----------|-----------|
| 0.0986512 | noncoding |
| 0.385945  | noncoding |
| 0.443066  | noncoding |
| 1         | coding    |
| 1         | coding    |
| 0.0499513 | noncoding |
| 0.101056  | noncoding |
| 0.975162  | coding    |
| 0.551039  | coding    |
| 0.53127   | coding    |
| 0.0777817 | noncoding |
| 0.163673  | noncoding |
| 0.553751  | coding    |
| 0.0151812 | noncoding |
| 0.130666  | noncoding |
| 0.0929334 | noncoding |
| 0.156496  | noncoding |
| 1         | coding    |
| 1         | coding    |
| 1         | coding    |
| 0.0261539 | noncoding |
| 0.164791  | noncoding |
| 1         | coding    |
| 1         | coding    |
| 0.0091595 | noncoding |
| 0.125729  | noncoding |
| 0.0569202 | noncoding |
| 0.0821236 | noncoding |
| 0.0691859 | noncoding |
| 0.029328  | noncoding |
| 0.105922  | noncoding |
| 0.928646  | coding    |
| 0.888237  | coding    |
| 0.35829   | noncoding |
| 0.113735  | noncoding |
| 0.313112  | noncoding |
| 0.999614  | coding    |
| 0.0199164 | noncoding |
| 1         | coding    |
| 1         | coding    |
| 0.114836  | noncoding |
| 0.412525  | noncoding |
| 0.51515   | coding    |
| 0.453463  | noncoding |
| 0.432871  | noncoding |
| 0.436339  | noncoding |
| 0.99998   | coding    |
| 0.999993  | coding    |
| 0.999982  | coding    |
| 1         | coding    |

|            |           |
|------------|-----------|
| 0.761896   | coding    |
| 0.962192   | coding    |
| 1          | coding    |
| 0.569366   | coding    |
| 0.1547     | noncoding |
| 0.160716   | noncoding |
| 1          | coding    |
| 0.0667586  | noncoding |
| 0.314871   | noncoding |
| 0.379348   | noncoding |
| 1          | coding    |
| 0.999429   | coding    |
| 1          | coding    |
| 1          | coding    |
| 0.99819    | coding    |
| 0.0170909  | noncoding |
| 0.0112326  | noncoding |
| 0.00741085 | noncoding |
| 0.00974822 | noncoding |
| 0.00968626 | noncoding |
| 0.00985869 | noncoding |
| 0.973543   | coding    |
| 0.972333   | coding    |
| 0.0191013  | noncoding |
| 0.00773505 | noncoding |
| 0.0168637  | noncoding |
| 0.982567   | coding    |
| 1          | coding    |
| 0.00978988 | noncoding |
| 1          | coding    |
| 0.0233191  | noncoding |
| 0.112138   | noncoding |
| 1          | coding    |
| 0.0441909  | noncoding |
| 0.0627428  | noncoding |
| 0.0250519  | noncoding |
| 0.176186   | noncoding |
| 0.281816   | noncoding |
| 0.162071   | noncoding |
| 0.321443   | noncoding |
| 1          | coding    |
| 1          | coding    |
| 0.140241   | noncoding |



|           |           |
|-----------|-----------|
| 0.23732   | noncoding |
| 0.999921  | coding    |
| 1         | coding    |
| 0.266496  | noncoding |
| 0.152492  | noncoding |
| 0.0907655 | noncoding |
| 1         | coding    |
| 0.937232  | coding    |
| 1         | coding    |
| 0.128508  | noncoding |
| 1         | coding    |
| 1         | coding    |
| 0.999999  | coding    |
| 0.999945  | coding    |
| 1         | coding    |
| 1         | coding    |
| 0.999334  | coding    |
| 0.165036  | noncoding |
| 0.668152  | coding    |
| 0.262307  | noncoding |
| 0.810388  | coding    |
| 0.877288  | coding    |
| 1         | coding    |
| 1         | coding    |
| 1         | coding    |
| 0.0340957 | noncoding |
| 0.999999  | coding    |
| 0.843408  | coding    |
| 0.90244   | coding    |
| 0.98161   | coding    |
| 0.974477  | coding    |
| 0.994042  | coding    |
| 0.953678  | coding    |
| 0.979477  | coding    |
| 0.806039  | coding    |

|           |           |
|-----------|-----------|
| 1         | coding    |
| 0.964089  | coding    |
| 1         | coding    |
| 1         | coding    |
| 1         | coding    |
| 0.111044  | noncoding |
| 1         | coding    |
| 1         | coding    |
| 0.200735  | noncoding |
| 1         | coding    |
| 0.999973  | coding    |
| 1         | coding    |
| 0.99548   | coding    |
| 1         | coding    |
| 1         | coding    |
| 0.163023  | noncoding |
| 0.995811  | coding    |
| 0.178735  | noncoding |
| 0.138711  | noncoding |
| 0.0546339 | noncoding |
| 1         | coding    |
| 0.433744  | noncoding |
| 0.983386  | coding    |
| 0.708813  | coding    |
| 0.992916  | coding    |
| 1         | coding    |
| 0.308196  | noncoding |
| 0.895158  | coding    |
| 0.999955  | coding    |
| 1         | coding    |
| 0.999953  | coding    |
| 1         | coding    |
| 0.0265188 | noncoding |
| 0.13121   | noncoding |
| 0.999965  | coding    |
| 0.996921  | coding    |
| 1         | coding    |

|            |           |
|------------|-----------|
| 1          | coding    |
| 0.0494443  | noncoding |
| 0.0287268  | noncoding |
| 0.0805949  | noncoding |
| 0.0997037  | noncoding |
| 0.0959804  | noncoding |
| 0.993507   | coding    |
| 1          | coding    |
| 1          | coding    |
| 0.875994   | coding    |
| 0.760293   | coding    |
| 0.319313   | noncoding |
| 1          | coding    |
| 0.189792   | noncoding |
| 1          | coding    |
| 0.00456476 | noncoding |
| 1          | coding    |
| 0.998752   | coding    |
| 1          | coding    |
| 0.163819   | noncoding |
| 0.999994   | coding    |
| 0.999823   | coding    |
| 0.999858   | coding    |
| 0.999999   | coding    |
| 1          | coding    |
| 0.173061   | noncoding |
| 1          | coding    |
| 0.0670506  | noncoding |
| 0.560223   | coding    |
| 1          | coding    |
| 1          | coding    |
| 0.0262519  | noncoding |
| 0.0140252  | noncoding |

|            |           |
|------------|-----------|
| 0.336901   | noncoding |
| 1          | coding    |
| 1          | coding    |
| 1          | coding    |
| 0.998088   | coding    |
| 0.770836   | coding    |
| 0.0948632  | noncoding |
| 0.342192   | noncoding |
| 1          | coding    |
| 0.168394   | noncoding |
| 0.145195   | noncoding |
| 0.0717231  | noncoding |
| 0.0534536  | noncoding |
| 1          | coding    |
| 1          | coding    |
| 0.999499   | coding    |
| 0.993098   | coding    |
| 0.958386   | coding    |
| 0.999761   | coding    |
| 0.0669941  | noncoding |
| 0.999999   | coding    |
| 0.947944   | coding    |
| 0.999908   | coding    |
| 1          | coding    |
| 0.0595337  | noncoding |
| 0.123286   | noncoding |
| 0.117817   | noncoding |
| 0.335189   | noncoding |
| 0.0541193  | noncoding |
| 0.00731376 | noncoding |
| 0.201428   | noncoding |
| 1          | coding    |
| 0.935196   | coding    |
| 1          | coding    |
| 0.999176   | coding    |
| 0.997915   | coding    |
| 0.999985   | coding    |
| 0.130774   | noncoding |
| 0.193822   | noncoding |
| 1          | coding    |
| 1          | coding    |
| 0.871041   | coding    |
| 0.023287   | noncoding |
| 0.986152   | coding    |
| 0.158263   | noncoding |
| 0.158131   | noncoding |
| 0.921577   | coding    |

|           |           |
|-----------|-----------|
| 0.510543  | coding    |
| 1         | coding    |
| 1         | coding    |
| 1         | coding    |
| 0.053636  | noncoding |
| 0.0379449 | noncoding |
| 1         | coding    |
| 0.113358  | noncoding |
| 1         | coding    |
| 1         | coding    |
| 0.210839  | noncoding |
| 1         | coding    |
| 1         | coding    |
| 0.0190269 | noncoding |
| 1         | coding    |
| 0.0361155 | noncoding |
| 0.923968  | coding    |
| 1         | coding    |
| 1         | coding    |
| 1         | coding    |
| 0.15709   | noncoding |
| 0.166216  | noncoding |
| 0.0803519 | noncoding |
| 1         | coding    |
| 0.0134813 | noncoding |
| 0.0320149 | noncoding |
| 1         | coding    |
| 1         | coding    |
| 0.438971  | noncoding |
| 1         | coding    |
| 1         | coding    |
| 1         | coding    |
| 0.284022  | noncoding |
| 0.999997  | coding    |
| 0.999999  | coding    |
| 0.999998  | coding    |
| 0.230035  | noncoding |
| 1         | coding    |
| 1         | coding    |
| 0.996619  | coding    |
| 0.999963  | coding    |
| 0.990038  | coding    |
| 0.999999  | coding    |
| 1         | coding    |
| 1         | coding    |
| 1         | coding    |
| 0.132211  | noncoding |
| 0.146895  | noncoding |
| 0.97878   | coding    |
| 1         | coding    |
| 0.981353  | coding    |
| 0.400426  | noncoding |
| 1         | coding    |
| 1         | coding    |

[illegible]

|            |           |
|------------|-----------|
| 1          | coding    |
| 0.0242634  | noncoding |
| 0.998513   | coding    |
| 0.206173   | noncoding |
| 0.99996    | coding    |
| 0.123759   | noncoding |
| 0.373956   | noncoding |
| 1          | coding    |
| 0.0442925  | noncoding |
| 0.999995   | coding    |
| 1          | coding    |
| 1          | coding    |
| 1          | coding    |
| 0.21551    | noncoding |
| 0.988161   | coding    |
| 1          | coding    |
| 1          | coding    |
| 1          | coding    |
| 0.897632   | coding    |
| 1          | coding    |
| 0.993669   | coding    |
| 0.118755   | noncoding |
| 1          | coding    |
| 0.00380956 | noncoding |
| 0.923545   | coding    |
| 0.789705   | coding    |
| 0.886638   | coding    |
| 0.870157   | coding    |
| 0.999382   | coding    |
| 0.993838   | coding    |
| 0.790991   | coding    |
| 0.170077   | noncoding |
| 0.903979   | coding    |
| 0.933284   | coding    |
| 0.997366   | coding    |
| 1          | coding    |
| 0.649818   | coding    |
| 0.114181   | noncoding |
| 1          | coding    |
| 0.0499253  | noncoding |
| 0.00957043 | noncoding |
| 0.06215    | noncoding |
| 0.0621869  | noncoding |
| 0.0808232  | noncoding |
| 0.0691665  | noncoding |
| 0.28084    | noncoding |
| 1          | coding    |
| 1          | coding    |

|           |           |
|-----------|-----------|
| 1         | coding    |
| 0.0644269 | noncoding |
| 0.99853   | coding    |
| 0.246179  | noncoding |
| 0.971413  | coding    |
| 0.150976  | noncoding |
| 0.999989  | coding    |
| 1         | coding    |
| 0.999775  | coding    |
| 0.506223  | coding    |
| 0.225084  | noncoding |
| 0.232583  | noncoding |
| 0.399989  | noncoding |
| 1         | coding    |
| 0.86596   | coding    |
| 0.385272  | noncoding |
| 0.775135  | coding    |
| 0.999471  | coding    |
| 0.999471  | coding    |
| 0.813001  | coding    |
| 0.257608  | noncoding |
| 0.833325  | coding    |
| 0.330814  | noncoding |
| 0.987984  | coding    |
| 0.0520286 | noncoding |
| 1         | coding    |
| 0.949615  | coding    |
| 0.0392437 | noncoding |
| 0.30236   | noncoding |
| 0.30236   | noncoding |
| 0.202055  | noncoding |
| 1         | coding    |
| 0.0172818 | noncoding |
| 0.774458  | coding    |
| 0.774458  | coding    |
| 1         | coding    |
| 1         | coding    |
| 0.132289  | noncoding |



|            |           |
|------------|-----------|
| 0.841325   | coding    |
| 1          | coding    |
| 1          | coding    |
| 1          | coding    |
| 0.024399   | noncoding |
| 0.0793784  | noncoding |
| 1          | coding    |
| 1          | coding    |
| 1          | coding    |
| 0.130684   | noncoding |
| 0.999986   | coding    |
| 0.999988   | coding    |
| 0.999994   | coding    |
| 0.999991   | coding    |
| 0.999925   | coding    |
| 0.999835   | coding    |
| 1          | coding    |
| 0.957366   | coding    |
| 0.988189   | coding    |
| 0.210812   | noncoding |
| 1          | coding    |
| 0.149649   | noncoding |
| 0.145838   | noncoding |
| 1          | coding    |
| 1          | coding    |
| 1          | coding    |
| 0.965205   | coding    |
| 0.275825   | noncoding |
| 0.0145814  | noncoding |
| 0.365554   | noncoding |
| 0.00448843 | noncoding |
| 1          | coding    |
| 0.051396   | noncoding |
| 0.0999891  | noncoding |
| 0.0552901  | noncoding |
| 0.999409   | coding    |
| 1          | coding    |
| 0.999463   | coding    |
| 0.0343567  | noncoding |
| 0.383767   | noncoding |
| 1          | coding    |
| 1          | coding    |
| 0.827382   | coding    |
| 0.999997   | coding    |
| 1          | coding    |
| 0.42408    | noncoding |
| 0.996809   | coding    |
| 0.0256566  | noncoding |
| 0.310535   | noncoding |
| 0.243281   | noncoding |
| 0.956865   | coding    |
| 1          | coding    |
| 1          | coding    |
| 1          | coding    |

|            |           |
|------------|-----------|
| 0.999464   | coding    |
| 1          | coding    |
| 0.999946   | coding    |
| 0.971779   | coding    |
| 0.99927    | coding    |
| 0.999827   | coding    |
| 0.0511203  | noncoding |
| 0.0794726  | noncoding |
| 0.0261554  | noncoding |
| 0.99988    | coding    |
| 0.109455   | noncoding |
| 1          | coding    |
| 0.0368292  | noncoding |
| 0.718554   | coding    |
| 0.00971124 | noncoding |
| 1          | coding    |
| 1          | coding    |
| 0.00678333 | noncoding |
| 1          | coding    |
| 0.997515   | coding    |
| 0.0895024  | noncoding |
| 0.816778   | coding    |
| 1          | coding    |
| 0.16997    | noncoding |
| 0.217195   | noncoding |
| 0.841219   | coding    |
| 0.230501   | noncoding |
| 0.996136   | coding    |
| 0.136864   | noncoding |
| 0.0328967  | noncoding |
| 0.171687   | noncoding |
| 0.0165464  | noncoding |
| 0.999648   | coding    |
| 0.232842   | noncoding |
| 0.0198458  | noncoding |
| 0.33901    | noncoding |
| 0.0118321  | noncoding |
| 0.999873   | coding    |
| 0.899434   | coding    |
| 0.327444   | noncoding |
| 0.0141155  | noncoding |
| 0.0538259  | noncoding |
| 0.0216829  | noncoding |
| 1          | coding    |
| 1          | coding    |
| 0.265887   | noncoding |
| 0.999815   | coding    |
| 0.0107611  | noncoding |
| 0.013261   | noncoding |
| 0.999999   | coding    |

|           |           |
|-----------|-----------|
| 1         | coding    |
| 0.159846  | noncoding |
| 1         | coding    |
| 1         | coding    |
| 1         | coding    |
| 0.586766  | coding    |
| 1         | coding    |
| 1         | coding    |
| 0.945067  | coding    |
| 1         | coding    |
| 0.913063  | coding    |
| 1         | coding    |
| 0.0132294 | noncoding |
| 1         | coding    |
| 0.994315  | coding    |
| 0.104548  | noncoding |
| 0.934207  | coding    |
| 0.108299  | noncoding |
| 0.0799812 | noncoding |
| 0.665526  | coding    |
| 0.997921  | coding    |
| 0.998875  | coding    |
| 0.999679  | coding    |
| 0.999958  | coding    |
| 0.316972  | noncoding |
| 1         | coding    |
| 0.0273137 | noncoding |
| 0.141976  | noncoding |
| 0.0452873 | noncoding |
| 1         | coding    |
| 0.765691  | coding    |
| 1         | coding    |

|           |           |
|-----------|-----------|
| 1         | coding    |
| 0.0105141 | noncoding |
| 1         | coding    |
| 0.996907  | coding    |
| 0.999985  | coding    |
| 1         | coding    |
| 1         | coding    |
| 0.84707   | coding    |
| 1         | coding    |
| 0.920271  | coding    |
| 0.0546175 | noncoding |
| 1         | coding    |
| 0.833696  | coding    |
| 0.134963  | noncoding |
| 0.633566  | coding    |
| 0.362887  | noncoding |
| 0.0725188 | noncoding |
| 0.141387  | noncoding |
| 0.185178  | noncoding |
| 0.999996  | coding    |
| 0.970005  | coding    |
| 1         | coding    |
| 0.999475  | coding    |
| 0.999994  | coding    |
| 0.999999  | coding    |
| 0.414787  | noncoding |
| 1         | coding    |
| 0.055934  | noncoding |
| 1         | coding    |
| 0.999978  | coding    |
| 0.999911  | coding    |
| 1         | coding    |
| 1         | coding    |
| 0.0701321 | noncoding |
| 0.843562  | coding    |
| 0.790256  | coding    |
| 0.830932  | coding    |

|            |           |
|------------|-----------|
| 0.69964    | coding    |
| 0.59407    | coding    |
| 0.348608   | noncoding |
| 0.0950697  | noncoding |
| 0.0839109  | noncoding |
| 0.658417   | coding    |
| 0.451844   | noncoding |
| 0.87336    | coding    |
| 0.993406   | coding    |
| 0.841987   | coding    |
| 0.807913   | coding    |
| 0.851577   | coding    |
| 0.785116   | coding    |
| 0.588526   | coding    |
| 0.959918   | coding    |
| 0.814356   | coding    |
| 0.931487   | coding    |
| 0.973143   | coding    |
| 0.774688   | coding    |
| 0.104782   | noncoding |
| 1          | coding    |
| 0.999991   | coding    |
| 1          | coding    |
| 1          | coding    |
| 1          | coding    |
| 0.0822141  | noncoding |
| 0.107127   | noncoding |
| 0.145544   | noncoding |
| 0.279415   | noncoding |
| 0.282534   | noncoding |
| 0.364967   | noncoding |
| 0.262005   | noncoding |
| 1          | coding    |
| 1          | coding    |
| 1          | coding    |
| 0.0383842  | noncoding |
| 0.945381   | coding    |
| 0.97263    | coding    |
| 0.835948   | coding    |
| 0.978861   | coding    |
| 1          | coding    |
| 0.999772   | coding    |
| 1          | coding    |
| 1          | coding    |
| 1          | coding    |
| 0.0701462  | noncoding |
| 0.985247   | coding    |
| 0.00592715 | noncoding |
| 0.364421   | noncoding |
| 0.160269   | noncoding |
| 0.254874   | noncoding |
| 0.011211   | noncoding |
| 0.0303948  | noncoding |
| 0.0576956  | noncoding |

|           |           |
|-----------|-----------|
| 0.0241929 | noncoding |
| 0.170557  | noncoding |
| 0.321614  | noncoding |
| 0.0871876 | noncoding |
| 0.189236  | noncoding |
| 0.468868  | noncoding |
| 0.468291  | noncoding |
| 0.0348153 | noncoding |
| 1         | coding    |
| 0.2154    | noncoding |
| 0.102033  | noncoding |
| 0.4415    | noncoding |
| 0.298346  | noncoding |
| 0.0531407 | noncoding |
| 0.0696377 | noncoding |
| 0.0452102 | noncoding |
| 0.0452102 | noncoding |
| 0.998249  | coding    |
| 0.998136  | coding    |
| 0.439806  | noncoding |
| 0.243359  | noncoding |
| 0.727039  | coding    |
| 0.0276146 | noncoding |
| 0.0444457 | noncoding |
| 0.876433  | coding    |
| 0.0330389 | noncoding |
| 1         | coding    |
| 0.151987  | noncoding |
| 0.999999  | coding    |
| 0.99997   | coding    |
| 0.0967768 | noncoding |
| 0.12368   | noncoding |
| 0.895652  | coding    |
| 0.999999  | coding    |
| 0.129725  | noncoding |
| 0.137233  | noncoding |
| 0.283905  | noncoding |
| 0.115993  | noncoding |
| 0.15453   | noncoding |
| 0.0617203 | noncoding |
| 0.999993  | coding    |
| 0.999992  | coding    |
| 1         | coding    |
| 0.822939  | coding    |
| 0.524065  | coding    |
| 0.171333  | noncoding |

|           |           |
|-----------|-----------|
| 0.171333  | noncoding |
| 0.187516  | noncoding |
| 0.249695  | noncoding |
| 0.124664  | noncoding |
| 0.0116385 | noncoding |
| 0.057632  | noncoding |
| 0.057632  | noncoding |
| 0.999823  | coding    |
| 0.999949  | coding    |
| 0.135018  | noncoding |
| 0.0251218 | noncoding |
| 0.99998   | coding    |
| 0.087064  | noncoding |
| 0.657273  | coding    |
| 0.996646  | coding    |
| 0.0658765 | noncoding |
| 0.164213  | noncoding |
| 1         | coding    |
| 0.990555  | coding    |
| 0.996692  | coding    |
| 0.99652   | coding    |
| 0.0170908 | noncoding |
| 0.0762486 | noncoding |
| 0.0167552 | noncoding |
| 0.0126229 | noncoding |
| 0.0133128 | noncoding |
| 0.0182402 | noncoding |
| 0.987221  | coding    |
| 0.998803  | coding    |
| 0.998732  | coding    |
| 0.998178  | coding    |
| 0.997547  | coding    |
| 1         | coding    |
| 0.999999  | coding    |
| 0.713854  | coding    |
| 0.120626  | noncoding |
| 0.0325965 | noncoding |
| 1         | coding    |
| 1         | coding    |
| 0.998755  | coding    |
| 1         | coding    |
| 0.997843  | coding    |
| 1         | coding    |
| 0.172772  | noncoding |
| 0.214602  | noncoding |
| 0.31058   | noncoding |

|            |           |
|------------|-----------|
| 0.120638   | noncoding |
| 0.0770483  | noncoding |
| 0.0509484  | noncoding |
| 0.0300605  | noncoding |
| 0.0310525  | noncoding |
| 0.0305787  | noncoding |
| 0.0201638  | noncoding |
| 0.303965   | noncoding |
| 0.999925   | coding    |
| 1          | coding    |
| 1          | coding    |
| 0.181072   | noncoding |
| 0.0134793  | noncoding |
| 0.217972   | noncoding |
| 0.237328   | noncoding |
| 0.0185528  | noncoding |
| 0.993966   | coding    |
| 0.853741   | coding    |
| 0.169246   | noncoding |
| 1          | coding    |
| 0.975145   | coding    |
| 0.84251    | coding    |
| 0.999026   | coding    |
| 0.0172486  | noncoding |
| 0.150793   | noncoding |
| 0.856387   | coding    |
| 1          | coding    |
| 0.0485404  | noncoding |
| 0.0268257  | noncoding |
| 0.469308   | noncoding |
| 0.999719   | coding    |
| 0.758671   | coding    |
| 0.999989   | coding    |
| 0.999995   | coding    |
| 0.113354   | noncoding |
| 0.982673   | coding    |
| 0.999991   | coding    |
| 0.0122583  | noncoding |
| 0.418072   | noncoding |
| 0.0256243  | noncoding |
| 0.00526197 | noncoding |
| 0.246378   | noncoding |
| 0.10189    | noncoding |
| 1          | coding    |
| 0.0973445  | noncoding |
| 0.126401   | noncoding |
| 0.0256443  | noncoding |



|            |           |
|------------|-----------|
| 0.101584   | noncoding |
| 1          | coding    |
| 1          | coding    |
| 0.999131   | coding    |
| 0.0885229  | noncoding |
| 0.844782   | coding    |
| 0.956853   | coding    |
| 0.119255   | noncoding |
| 1          | coding    |
| 1          | coding    |
| 1          | coding    |
| 0.879384   | coding    |
| 0.840814   | coding    |
| 0.435251   | noncoding |
| 0.0527164  | noncoding |
| 1          | coding    |
| 0.99967    | coding    |
| 0.995577   | coding    |
| 0.999996   | coding    |
| 0.999997   | coding    |
| 0.999996   | coding    |
| 0.0142876  | noncoding |
| 0.0791396  | noncoding |
| 0.123166   | noncoding |
| 1          | coding    |
| 0.179474   | noncoding |
| 0.124736   | noncoding |
| 0.179738   | noncoding |
| 0.709401   | coding    |
| 0.215154   | noncoding |
| 0.226306   | noncoding |
| 0.385956   | noncoding |
| 0.0415103  | noncoding |
| 0.103916   | noncoding |
| 0.0492459  | noncoding |
| 0.00570229 | noncoding |
| 1          | coding    |
| 0.236066   | noncoding |
| 0.0387599  | noncoding |
| 1          | coding    |
| 0.117249   | noncoding |
| 1          | coding    |
| 1          | coding    |
| 0.23484    | noncoding |
| 0.454602   | noncoding |
| 1          | coding    |
| 1          | coding    |
| 0.111229   | noncoding |
| 0.0193062  | noncoding |
| 0.0318469  | noncoding |
| 0.012413   | noncoding |
| 0.0277287  | noncoding |
| 0.0623464  | noncoding |
| 1          | coding    |

|            |           |
|------------|-----------|
| 0.197175   | noncoding |
| 0.019553   | noncoding |
| 0.0219086  | noncoding |
| 0.00254759 | noncoding |
| 0.0615719  | noncoding |
| 0.164689   | noncoding |
| 0.00722955 | noncoding |
| 0.0046227  | noncoding |
| 0.419178   | noncoding |
| 1          | coding    |
| 0.171071   | noncoding |
| 0.102127   | noncoding |
| 0.0200233  | noncoding |
| 0.401654   | noncoding |
| 0.999998   | coding    |
| 0.0120903  | noncoding |
| 0.296668   | noncoding |
| 0.990897   | coding    |
| 0.0447686  | noncoding |
| 0.913266   | coding    |
| 1          | coding    |
| 1          | coding    |
| 0.116367   | noncoding |
| 0.999897   | coding    |
| 1          | coding    |
| 1          | coding    |
| 0.79289    | coding    |
| 0.972782   | coding    |
| 0.461537   | noncoding |
| 0.097472   | noncoding |
| 0.0375189  | noncoding |
| 0.0348755  | noncoding |
| 0.159923   | noncoding |
| 0.999991   | coding    |
| 0.999992   | coding    |
| 1          | coding    |
| 0.0693048  | noncoding |
| 0.00844644 | noncoding |
| 0.0171967  | noncoding |
| 0.0197825  | noncoding |
| 1          | coding    |
| 0.164475   | noncoding |
| 0.0138209  | noncoding |
| 1          | coding    |
| 1          | coding    |
| 0.999085   | coding    |
| 0.0629802  | noncoding |
| 1          | coding    |
| 0.99999    | coding    |
| 0.999911   | coding    |
| 1          | coding    |

|            |           |
|------------|-----------|
| 1          | coding    |
| 1          | coding    |
| 0.542283   | coding    |
| 0.104714   | noncoding |
| 0.854629   | coding    |
| 1          | coding    |
| 0.200046   | noncoding |
| 1          | coding    |
| 1          | coding    |
| 1          | coding    |
| 0.999997   | coding    |
| 0.99937    | coding    |
| 0.237225   | noncoding |
| 1          | coding    |
| 0.990698   | coding    |
| 0.996257   | coding    |
| 1          | coding    |
| 0.174339   | noncoding |
| 0.00485826 | noncoding |
| 0.178916   | noncoding |
| 0.385858   | noncoding |
| 0.136891   | noncoding |
| 0.429063   | noncoding |
| 1          | coding    |
| 0.977355   | coding    |
| 1          | coding    |
| 0.987052   | coding    |
| 0.11914    | noncoding |
| 0.418269   | noncoding |
| 0.0327633  | noncoding |
| 0.830043   | coding    |
| 0.845676   | coding    |
| 1          | coding    |
| 0.062943   | noncoding |
| 1          | coding    |
| 0.999999   | coding    |
| 1          | coding    |
| 0.999999   | coding    |
| 0.999999   | coding    |
| 0.999991   | coding    |
| 0.0199541  | noncoding |
| 0.99495    | coding    |
| 0.0068135  | noncoding |
| 0.00799318 | noncoding |
| 1          | coding    |
| 1          | coding    |

|           |           |
|-----------|-----------|
| 0.996596  | coding    |
| 0.0411395 | noncoding |
| 0.177785  | noncoding |
| 1         | coding    |
| 1         | coding    |
| 0.231743  | noncoding |
| 0.0363795 | noncoding |
| 1         | coding    |
| 0.0498594 | noncoding |
| 0.221833  | noncoding |
| 0.405877  | noncoding |
| 0.0613315 | noncoding |
| 0.421785  | noncoding |
| 0.157968  | noncoding |
| 0.179322  | noncoding |
| 1         | coding    |
| 0.999939  | coding    |
| 0.976318  | coding    |
| 0.47659   | noncoding |
| 1         | coding    |
| 0.999924  | coding    |
| 0.999976  | coding    |
| 0.308815  | noncoding |
| 0.0343261 | noncoding |
| 1         | coding    |
| 0.153947  | noncoding |
| 0.0607024 | noncoding |
| 0.0261187 | noncoding |
| 0.0163158 | noncoding |
| 0.993774  | coding    |
| 0.544677  | coding    |
| 0.14042   | noncoding |
| 0.0825787 | noncoding |
| 0.518083  | coding    |
| 0.575492  | coding    |
| 0.062391  | noncoding |
| 0.174306  | noncoding |
| 0.341289  | noncoding |
| 1         | coding    |
| 1         | coding    |

|            |           |
|------------|-----------|
| 0.903623   | coding    |
| 0.999967   | coding    |
| 1          | coding    |
| 0.999758   | coding    |
| 0.999245   | coding    |
| 0.0490633  | noncoding |
| 0.993823   | coding    |
| 1          | coding    |
| 0.997884   | coding    |
| 0.999944   | coding    |
| 0.987711   | coding    |
| 1          | coding    |
| 0.0329994  | noncoding |
| 0.352069   | noncoding |
| 0.646977   | coding    |
| 0.433699   | noncoding |
| 0.0865694  | noncoding |
| 1          | coding    |
| 0.426399   | noncoding |
| 0.192253   | noncoding |
| 0.0232215  | noncoding |
| 0.00595803 | noncoding |
| 0.166884   | noncoding |
| 0.166884   | noncoding |
| 1          | coding    |
| 0.952204   | coding    |
| 0.0391597  | noncoding |
| 0.999997   | coding    |
| 0.788218   | coding    |
| 1          | coding    |
| 0.135972   | noncoding |
| 0.998512   | coding    |
| 1          | coding    |
| 1          | coding    |
| 1          | coding    |
| 0.911      | coding    |
| 0.756109   | coding    |
| 0.391958   | noncoding |
| 1          | coding    |
| 0.0689959  | noncoding |
| 0.0307612  | noncoding |
| 1          | coding    |
| 1          | coding    |
| 0.128904   | noncoding |
| 1          | coding    |
| 0.999974   | coding    |
| 0.999998   | coding    |
| 0.101607   | noncoding |

[illegible]

|            |           |
|------------|-----------|
| 1          | coding    |
| 0.999929   | coding    |
| 1          | coding    |
| 0.12078    | noncoding |
| 0.0179995  | noncoding |
| 0.339155   | noncoding |
| 0.0465895  | noncoding |
| 1          | coding    |
| 1          | coding    |
| 1          | coding    |
| 0.996852   | coding    |
| 0.999188   | coding    |
| 0.998633   | coding    |
| 1          | coding    |
| 0.996579   | coding    |
| 0.203857   | noncoding |
| 0.0866289  | noncoding |
| 0.00719728 | noncoding |
| 0.00574535 | noncoding |
| 0.909884   | coding    |
| 0.0782745  | noncoding |
| 0.345294   | noncoding |
| 0.158938   | noncoding |
| 0.0197567  | noncoding |
| 0.0214057  | noncoding |
| 0.00394166 | noncoding |
| 1          | coding    |
| 1          | coding    |
| 1          | coding    |
| 0.999996   | coding    |
| 0.568579   | coding    |
| 0.132463   | noncoding |
| 1          | coding    |
| 0.999597   | coding    |
| 0.999977   | coding    |
| 1          | coding    |
| 1          | coding    |
| 0.0392719  | noncoding |
| 0.0294346  | noncoding |
| 0.22873    | noncoding |
| 0.0369612  | noncoding |
| 0.0698179  | noncoding |
| 0.0344632  | noncoding |
| 0.501997   | coding    |
| 0.0696734  | noncoding |
| 0.0253845  | noncoding |
| 0.0158608  | noncoding |

|           |           |
|-----------|-----------|
| 0.0301302 | noncoding |
| 0.99998   | coding    |
| 0.885132  | coding    |
| 0.885132  | coding    |
| 0.99902   | coding    |
| 0.997914  | coding    |
| 1         | coding    |
| 0.636676  | coding    |
| 1         | coding    |
| 0.305625  | noncoding |
| 0.370002  | noncoding |
| 0.655096  | coding    |
| 0.856472  | coding    |
| 0.914569  | coding    |
| 0.908977  | coding    |
| 0.170034  | noncoding |
| 0.620431  | coding    |
| 0.999426  | coding    |
| 0.313302  | noncoding |
| 1         | coding    |
| 0.975437  | coding    |
| 0.716085  | coding    |
| 0.913585  | coding    |
| 0.999507  | coding    |
| 1         | coding    |
| 1         | coding    |
| 0.404229  | noncoding |
| 0.290512  | noncoding |
| 0.980909  | coding    |
| 0.995315  | coding    |
| 1         | coding    |
| 1         | coding    |
| 0.323657  | noncoding |
| 0.926768  | coding    |
| 0.357026  | noncoding |
| 0.317378  | noncoding |
| 0.0441295 | noncoding |
| 1         | coding    |
| 0.311638  | noncoding |
| 1         | coding    |
| 0.999948  | coding    |
| 0.999999  | coding    |
| 1         | coding    |
| 0.436846  | noncoding |



|           |           |
|-----------|-----------|
| 0.996957  | coding    |
| 0.981483  | coding    |
| 1         | coding    |
| 1         | coding    |
| 0.136324  | noncoding |
| 0.989457  | coding    |
| 0.999786  | coding    |
| 1         | coding    |
| 0.338542  | noncoding |
| 1         | coding    |
| 0.0146766 | noncoding |
| 0.982428  | coding    |
| 0.894246  | coding    |
| 0.0308294 | noncoding |
| 0.0204053 | noncoding |
| 0.209889  | noncoding |
| 0.999785  | coding    |
| 1         | coding    |
| 0.943017  | coding    |
| 0.0490565 | noncoding |
| 1         | coding    |
| 1         | coding    |
| 1         | coding    |
| 0.999497  | coding    |
| 0.113723  | noncoding |
| 0.110563  | noncoding |
| 1         | coding    |
| 0.89807   | coding    |
| 0.273359  | noncoding |
| 0.589817  | coding    |
| 0.641716  | coding    |
| 0.74246   | coding    |
| 0.27335   | noncoding |
| 1         | coding    |
| 0.969878  | coding    |
| 0.961973  | coding    |
| 0.519493  | coding    |
| 1         | coding    |

|           |           |
|-----------|-----------|
| 1         | coding    |
| 1         | coding    |
| 1         | coding    |
| 0.868786  | coding    |
| 0.945591  | coding    |
| 1         | coding    |
| 0.999989  | coding    |
| 0.999948  | coding    |
| 0.996083  | coding    |
| 0.999973  | coding    |
| 1         | coding    |
| 1         | coding    |
| 0.875981  | coding    |
| 1         | coding    |
| 0.0801743 | noncoding |
| 0.361903  | noncoding |
| 0.72266   | coding    |
| 0.0785986 | noncoding |
| 0.0279197 | noncoding |
| 0.232782  | noncoding |
| 1         | coding    |
| 0.999151  | coding    |
| 1         | coding    |
| 1         | coding    |
| 0.999989  | coding    |
| 0.178997  | noncoding |
| 0.842957  | coding    |
| 0.848685  | coding    |
| 0.599019  | coding    |
| 0.940423  | coding    |
| 0.966525  | coding    |
| 0.117046  | noncoding |
| 0.119468  | noncoding |
| 1         | coding    |
| 1         | coding    |
| 0.0912071 | noncoding |
| 0.028736  | noncoding |
| 1         | coding    |
| 0.323186  | noncoding |
| 1         | coding    |
| 0.0629558 | noncoding |
| 0.022867  | noncoding |
| 0.586528  | coding    |
| 0.062379  | noncoding |
| 1         | coding    |
| 1         | coding    |
| 1         | coding    |

|           |           |
|-----------|-----------|
| 0.999411  | coding    |
| 1         | coding    |
| 1         | coding    |
| 0.2059    | noncoding |
| 1         | coding    |
| 1         | coding    |
| 1         | coding    |
| 0.101653  | noncoding |
| 0.992155  | coding    |
| 0.240136  | noncoding |
| 0.175952  | noncoding |
| 1         | coding    |
| 1         | coding    |
| 1         | coding    |
| 0.999964  | coding    |
| 0.999977  | coding    |
| 0.999968  | coding    |
| 0.99997   | coding    |
| 0.0321075 | noncoding |
| 0.135009  | noncoding |
| 0.122443  | noncoding |
| 0.999993  | coding    |
| 0.688242  | coding    |
| 1         | coding    |
| 0.0328972 | noncoding |
| 1         | coding    |
| 0.999014  | coding    |
| 0.981441  | coding    |
| 0.998982  | coding    |
| 0.150296  | noncoding |
| 1         | coding    |
| 0.131726  | noncoding |
| 0.144628  | noncoding |
| 0.999968  | coding    |
| 0.98975   | coding    |
| 0.998364  | coding    |
| 0.373301  | noncoding |
| 1         | coding    |
| 1         | coding    |
| 0.987044  | coding    |
| 1         | coding    |
| 0.976509  | coding    |
| 0.995861  | coding    |
| 0.942329  | coding    |
| 0.980013  | coding    |
| 0.998492  | coding    |
| 0.999181  | coding    |
| 0.998618  | coding    |
| 0.998743  | coding    |
| 0.997673  | coding    |
| 0.977041  | coding    |
| 1         | coding    |
| 1         | coding    |
| 0.124962  | noncoding |

|           |           |
|-----------|-----------|
| 0.999965  | coding    |
| 0.999996  | coding    |
| 0.999994  | coding    |
| 0.0437387 | noncoding |
| 0.0825259 | noncoding |
| 1         | coding    |
| 0.0763476 | noncoding |
| 0.320806  | noncoding |
| 0.207989  | noncoding |
| 0.215407  | noncoding |
| 0.275078  | noncoding |
| 1         | coding    |
| 0.819771  | coding    |
| 0.176097  | noncoding |
| 1         | coding    |
| 1         | coding    |
| 0.743211  | coding    |
| 1         | coding    |
| 0.999602  | coding    |
| 0.999364  | coding    |
| 0.125054  | noncoding |
| 0.149686  | noncoding |
| 0.125054  | noncoding |
| 0.320395  | noncoding |
| 0.999537  | coding    |
| 0.076381  | noncoding |
| 0.13657   | noncoding |
| 1         | coding    |
| 1         | coding    |
| 0.0657384 | noncoding |
| 0.0141762 | noncoding |
| 1         | coding    |
| 0.707814  | coding    |
| 0.977688  | coding    |
| 0.125612  | noncoding |
| 1         | coding    |
| 1         | coding    |
| 0.265113  | noncoding |
| 1         | coding    |
| 1         | coding    |
| 0.499948  | noncoding |
| 0.0202668 | noncoding |
| 1         | coding    |
| 0.978593  | coding    |
| 1         | coding    |
| 0.196945  | noncoding |
| 0.052167  | noncoding |
| 0.0160449 | noncoding |
| 1         | coding    |
| 0.318079  | noncoding |
| 0.0144506 | noncoding |
| 1         | coding    |
| 1         | coding    |
| 0.0312788 | noncoding |

[illegible]

|           |           |
|-----------|-----------|
| 0.970477  | coding    |
| 0.447227  | noncoding |
| 0.0834325 | noncoding |
| 1         | coding    |
| 0.0768855 | noncoding |
| 0.0119964 | noncoding |
| 1         | coding    |
| 0.0291988 | noncoding |
| 0.44591   | noncoding |
| 0.759534  | coding    |
| 0.123391  | noncoding |
| 0.176097  | noncoding |
| 0.0238126 | noncoding |
| 0.128009  | noncoding |
| 0.72637   | coding    |
| 0.0692993 | noncoding |
| 0.0271883 | noncoding |
| 0.16324   | noncoding |
| 0.120702  | noncoding |
| 0.484548  | noncoding |
| 1         | coding    |
| 0.0403058 | noncoding |
| 1         | coding    |
| 0.999968  | coding    |
| 1         | coding    |
| 0.993728  | coding    |
| 1         | coding    |
| 1         | coding    |
| 0.0558673 | noncoding |
| 0.223024  | noncoding |
| 0.999997  | coding    |
| 1         | coding    |
| 0.999981  | coding    |
| 0.0562333 | noncoding |
| 1         | coding    |
| 0.23775   | noncoding |
| 0.339853  | noncoding |
| 0.989265  | coding    |
| 0.999997  | coding    |
| 1         | coding    |
| 0.999873  | coding    |
| 0.998332  | coding    |
| 0.999929  | coding    |
| 0.999924  | coding    |
| 0.99988   | coding    |
| 0.999897  | coding    |
| 0.528823  | coding    |
| 0.837032  | coding    |
| 0.994929  | coding    |
| 0.977235  | coding    |

|           |           |
|-----------|-----------|
| 0.994929  | coding    |
| 0.996232  | coding    |
| 0.97514   | coding    |
| 0.999315  | coding    |
| 0.994929  | coding    |
| 0.254719  | noncoding |
| 1         | coding    |
| 0.620747  | coding    |
| 0.374279  | noncoding |
| 0.177082  | noncoding |
| 0.0458283 | noncoding |
| 0.257731  | noncoding |
| 0.371201  | noncoding |
| 0.336454  | noncoding |
| 0.0179527 | noncoding |
| 0.99948   | coding    |
| 0.999451  | coding    |
| 0.999845  | coding    |
| 0.36164   | noncoding |
| 0.108472  | noncoding |
| 0.10547   | noncoding |
| 0.0973269 | noncoding |
| 0.0973269 | noncoding |
| 0.0616769 | noncoding |
| 1         | coding    |
| 0.999963  | coding    |
| 0.99998   | coding    |
| 0.0401969 | noncoding |
| 1         | coding    |
| 1         | coding    |
| 1         | coding    |
| 0.999237  | coding    |
| 0.019574  | noncoding |
| 0.999954  | coding    |
| 0.999912  | coding    |
| 1         | coding    |
| 0.588386  | coding    |
| 0.999814  | coding    |
| 0.999993  | coding    |
| 0.999814  | coding    |
| 0.99991   | coding    |
| 0.449807  | noncoding |
| 0.999746  | coding    |
| 0.999971  | coding    |

|           |           |
|-----------|-----------|
| 0.294192  | noncoding |
| 0.049165  | noncoding |
| 0.134292  | noncoding |
| 0.292116  | noncoding |
| 1         | coding    |
| 1         | coding    |
| 1         | coding    |
| 0.865026  | coding    |
| 0.952073  | coding    |
| 0.562292  | coding    |
| 0.999539  | coding    |
| 0.960077  | coding    |
| 0.834912  | coding    |
| 0.999903  | coding    |
| 0.99998   | coding    |
| 1         | coding    |
| 0.0198139 | noncoding |
| 0.999999  | coding    |
| 1         | coding    |
| 0.85852   | coding    |
| 1         | coding    |
| 0.703337  | coding    |
| 0.17505   | noncoding |
| 0.116819  | noncoding |
| 0.496802  | noncoding |
| 0.985685  | coding    |
| 0.997725  | coding    |
| 0.941221  | coding    |
| 0.0156645 | noncoding |
| 0.409731  | noncoding |
| 0.119229  | noncoding |
| 0.411266  | noncoding |
| 0.319438  | noncoding |
| 0.02202   | noncoding |
| 0.99925   | coding    |
| 0.190285  | noncoding |
| 1         | coding    |
| 0.828472  | coding    |
| 0.807682  | coding    |
| 0.945222  | coding    |
| 1         | coding    |
| 0.99926   | coding    |
| 0.423426  | noncoding |
| 0.443428  | noncoding |
| 1         | coding    |



|            |           |
|------------|-----------|
| 1          | coding    |
| 1          | coding    |
| 0.999994   | coding    |
| 1          | coding    |
| 0.978871   | coding    |
| 0.912237   | coding    |
| 0.982879   | coding    |
| 0.400584   | noncoding |
| 1          | coding    |
| 0.999999   | coding    |
| 0.0507835  | noncoding |
| 0.029225   | noncoding |
| 0.0458657  | noncoding |
| 0.995238   | coding    |
| 1          | coding    |
| 0.294588   | noncoding |
| 0.535735   | coding    |
| 0.0409151  | noncoding |
| 0.999649   | coding    |
| 0.782151   | coding    |
| 0.999866   | coding    |
| 0.995054   | coding    |
| 0.993001   | coding    |
| 0.863851   | coding    |
| 0.999994   | coding    |
| 1          | coding    |
| 1          | coding    |
| 1          | coding    |
| 0.0296337  | noncoding |
| 1          | coding    |
| 1          | coding    |
| 0.00648998 | noncoding |
| 1          | coding    |
| 0.999782   | coding    |
| 0.987525   | coding    |
| 1          | coding    |
| 1          | coding    |
| 0.999936   | coding    |
| 1          | coding    |
| 1          | coding    |
| 1          | coding    |
| 0.642099   | coding    |
| 0.80768    | coding    |
| 0.681662   | coding    |
| 1          | coding    |
| 0.0276808  | noncoding |

|            |           |
|------------|-----------|
| 0.832574   | coding    |
| 0.0482298  | noncoding |
| 0.407248   | noncoding |
| 0.210817   | noncoding |
| 1          | coding    |
| 0.99994    | coding    |
| 1          | coding    |
| 0.0543571  | noncoding |
| 0.00842301 | noncoding |
| 0.917551   | coding    |
| 1          | coding    |
| 0.0716423  | noncoding |
| 0.189799   | noncoding |
| 0.999989   | coding    |
| 0.175238   | noncoding |
| 0.00991276 | noncoding |
| 1          | coding    |
| 0.176071   | noncoding |
| 0.0411031  | noncoding |
| 1          | coding    |
| 0.166115   | noncoding |
| 0.0210414  | noncoding |
| 0.178356   | noncoding |
| 0.955208   | coding    |

|            |           |
|------------|-----------|
| 1          | coding    |
| 0.911486   | coding    |
| 0.987575   | coding    |
| 1          | coding    |
| 0.912543   | coding    |
| 0.994868   | coding    |
| 0.986732   | coding    |
| 0.991812   | coding    |
| 0.999968   | coding    |
| 1          | coding    |
| 0.167966   | noncoding |
| 0.0639643  | noncoding |
| 0.075283   | noncoding |
| 0.0901725  | noncoding |
| 0.0123114  | noncoding |
| 0.0253034  | noncoding |
| 0.0249244  | noncoding |
| 0.0133401  | noncoding |
| 0.927256   | coding    |
| 0.0190716  | noncoding |
| 0.999986   | coding    |
| 0.999868   | coding    |
| 1          | coding    |
| 0.999999   | coding    |
| 1          | coding    |
| 0.970411   | coding    |
| 0.90415    | coding    |
| 0.949806   | coding    |
| 1          | coding    |
| 0.778093   | coding    |
| 0.981257   | coding    |
| 0.00997935 | noncoding |
| 0.0354739  | noncoding |
| 1          | coding    |
| 1          | coding    |
| 0.094801   | noncoding |

|            |           |
|------------|-----------|
| 0.657268   | coding    |
| 0.0852388  | noncoding |
| 0.0148518  | noncoding |
| 0.0162009  | noncoding |
| 0.141711   | noncoding |
| 0.150629   | noncoding |
| 1          | coding    |
| 1          | coding    |
| 0.999884   | coding    |
| 1          | coding    |
| 0.86001    | coding    |
| 0.999851   | coding    |
| 0.231911   | noncoding |
| 0.447138   | noncoding |
| 0.989212   | coding    |
| 0.56402    | coding    |
| 0.051813   | noncoding |
| 1          | coding    |
| 0.0323727  | noncoding |
| 0.0214797  | noncoding |
| 0.990901   | coding    |
| 0.999945   | coding    |
| 0.363028   | noncoding |
| 0.00786152 | noncoding |
| 0.999972   | coding    |
| 0.0136367  | noncoding |
| 0.0607557  | noncoding |
| 0.0575779  | noncoding |
| 0.242178   | noncoding |
| 0.066517   | noncoding |
| 1          | coding    |
| 0.994609   | coding    |
| 0.443921   | noncoding |
| 0.0891568  | noncoding |
| 0.156833   | noncoding |
| 0.995695   | coding    |
| 0.0214461  | noncoding |
| 1          | coding    |
| 0.981637   | coding    |
| 1          | coding    |
| 0.548847   | coding    |
| 0.249383   | noncoding |
| 0.1738     | noncoding |
| 0.1738     | noncoding |
| 0.960848   | coding    |
| 0.0327994  | noncoding |
| 0.999999   | coding    |
| 1          | coding    |
| 0.0723994  | noncoding |
| 0.371847   | noncoding |
| 1          | coding    |

|           |           |
|-----------|-----------|
| 0.999994  | coding    |
| 0.124011  | noncoding |
| 1         | coding    |
| 1         | coding    |
| 0.0461508 | noncoding |
| 0.0546421 | noncoding |
| 1         | coding    |
| 0.198873  | noncoding |
| 0.0542503 | noncoding |
| 1         | coding    |
| 0.223804  | noncoding |
| 1         | coding    |
| 1         | coding    |
| 0.024149  | noncoding |
| 0.0336648 | noncoding |
| 0.999915  | coding    |
| 0.999999  | coding    |
| 0.999998  | coding    |
| 1         | coding    |
| 0.221083  | noncoding |
| 0.992066  | coding    |
| 1         | coding    |
| 1         | coding    |
| 1         | coding    |
| 0.091422  | noncoding |
| 1         | coding    |
| 0.999994  | coding    |
| 1         | coding    |
| 0.995809  | coding    |
| 0.0841476 | noncoding |
| 0.29298   | noncoding |
| 0.153797  | noncoding |
| 0.999998  | coding    |
| 0.544051  | coding    |
| 0.99987   | coding    |
| 0.999801  | coding    |
| 1         | coding    |
| 1         | coding    |
| 0.997068  | coding    |
| 0.997334  | coding    |
| 0.804583  | coding    |
| 0.998992  | coding    |
| 0.694136  | coding    |
| 0.427132  | noncoding |
| 0.487496  | noncoding |
| 0.0135971 | noncoding |
| 0.911418  | coding    |
| 0.971319  | coding    |
| 0.96318   | coding    |
| 0.976861  | coding    |
| 0.963277  | coding    |

|            |           |
|------------|-----------|
| 0.999869   | coding    |
| 0.993824   | coding    |
| 0.999957   | coding    |
| 0.999974   | coding    |
| 1          | coding    |
| 0.997521   | coding    |
| 0.0506656  | noncoding |
| 0.620163   | coding    |
| 1          | coding    |
| 0.0624073  | noncoding |
| 0.0248071  | noncoding |
| 0.074382   | noncoding |
| 0.999477   | coding    |
| 1          | coding    |
| 0.981635   | coding    |
| 0.983799   | coding    |
| 1          | coding    |
| 0.070997   | noncoding |
| 1          | coding    |
| 1          | coding    |
| 0.00670882 | noncoding |
| 0.0297446  | noncoding |
| 0.317014   | noncoding |
| 0.998836   | coding    |
| 1          | coding    |
| 0.0637736  | noncoding |
| 0.998461   | coding    |
| 0.996829   | coding    |
| 0.997106   | coding    |
| 0.999921   | coding    |
| 0.999688   | coding    |
| 0.980859   | coding    |
| 0.997043   | coding    |
| 0.999438   | coding    |
| 0.999986   | coding    |
| 0.999994   | coding    |
| 0.999409   | coding    |
| 0.993468   | coding    |
| 1          | coding    |
| 0.999997   | coding    |
| 0.168288   | noncoding |
| 0.999994   | coding    |
| 0.999998   | coding    |
| 0.999998   | coding    |
| 0.999998   | coding    |
| 1          | coding    |

|            |           |
|------------|-----------|
| 1          | coding    |
| 0.999972   | coding    |
| 1          | coding    |
| 1          | coding    |
| 1          | coding    |
| 0.999877   | coding    |
| 1          | coding    |
| 1          | coding    |
| 1          | coding    |
| 0.999997   | coding    |
| 0.868272   | coding    |
| 0.25222    | noncoding |
| 0.0272914  | noncoding |
| 0.0234541  | noncoding |
| 0.99919    | coding    |
| 0.0166735  | noncoding |
| 1          | coding    |
| 0.497784   | noncoding |
| 0.1238     | noncoding |
| 0.0485062  | noncoding |
| 0.0411031  | noncoding |
| 1          | coding    |
| 0.00603817 | noncoding |
| 0.136644   | noncoding |
| 0.782379   | coding    |
| 0.999792   | coding    |
| 0.999514   | coding    |
| 0.00861012 | noncoding |
| 0.998927   | coding    |
| 0.997567   | coding    |
| 0.995913   | coding    |
| 0.995571   | coding    |
| 0.992918   | coding    |
| 0.152326   | noncoding |
| 0.563819   | coding    |
| 0.0995941  | noncoding |
| 1          | coding    |
| 0.962701   | coding    |
| 1          | coding    |
| 0.908112   | coding    |
| 0.941841   | coding    |
| 0.999316   | coding    |

|            |           |
|------------|-----------|
| 1          | coding    |
| 0.851723   | coding    |
| 0.00686615 | noncoding |
| 1          | coding    |
| 1          | coding    |
| 1          | coding    |
| 0.912862   | coding    |
| 0.999957   | coding    |
| 0.22913    | noncoding |
| 0.204756   | noncoding |
| 0.126636   | noncoding |
| 0.0100298  | noncoding |
| 0.0738052  | noncoding |
| 0.00571093 | noncoding |
| 0.30658    | noncoding |
| 0.865298   | coding    |
| 0.475018   | noncoding |
| 0.0601755  | noncoding |
| 0.999382   | coding    |
| 0.314176   | noncoding |
| 0.247279   | noncoding |
| 1          | coding    |
| 1          | coding    |
| 0.0246929  | noncoding |
| 0.324176   | noncoding |
| 0.999855   | coding    |
| 0.99903    | coding    |
| 0.999578   | coding    |
| 0.900235   | coding    |
| 1          | coding    |
| 0.999985   | coding    |
| 0.0385161  | noncoding |
| 0.0382088  | noncoding |
| 1          | coding    |
| 0.999996   | coding    |
| 0.398621   | noncoding |
| 0.623868   | coding    |
| 0.18743    | noncoding |
| 0.0317785  | noncoding |
| 1          | coding    |
| 1          | coding    |
| 0.637599   | coding    |
| 0.216553   | noncoding |
| 0.28724    | noncoding |
| 1          | coding    |
| 0.0244379  | noncoding |
| 0.044406   | noncoding |
| 0.986698   | coding    |
| 0.99999    | coding    |
| 0.0860908  | noncoding |
| 0.970079   | coding    |



|            |           |
|------------|-----------|
| 1          | coding    |
| 0.99935    | coding    |
| 0.999431   | coding    |
| 1          | coding    |
| 0.737598   | coding    |
| 0.535231   | coding    |
| 0.957602   | coding    |
| 0.141879   | noncoding |
| 0.131194   | noncoding |
| 0.0630125  | noncoding |
| 0.246582   | noncoding |
| 0.031238   | noncoding |
| 0.599785   | coding    |
| 0.998811   | coding    |
| 0.315849   | noncoding |
| 0.217787   | noncoding |
| 0.920664   | coding    |
| 0.995977   | coding    |
| 1          | coding    |
| 0.311092   | noncoding |
| 0.119467   | noncoding |
| 0.00262548 | noncoding |
| 0.0193023  | noncoding |
| 0.999014   | coding    |
| 1          | coding    |
| 0.12633    | noncoding |
| 0.98483    | coding    |
| 0.0136834  | noncoding |
| 0.999999   | coding    |
| 0.999999   | coding    |
| 1          | coding    |
| 0.98632    | coding    |
| 0.997528   | coding    |
| 0.40455    | noncoding |
| 0.575178   | coding    |
| 1          | coding    |
| 0.999846   | coding    |
| 1          | coding    |
| 1          | coding    |
| 0.163739   | noncoding |
| 0.0515519  | noncoding |
| 0.508985   | coding    |
| 0.508985   | coding    |
| 0.0830377  | noncoding |

[illegible]

|            |           |
|------------|-----------|
| 0.384698   | noncoding |
| 0.00932705 | noncoding |
| 0.0090223  | noncoding |
| 0.185433   | noncoding |
| 0.0676901  | noncoding |
| 0.115569   | noncoding |
| 0.064753   | noncoding |
| 0.921157   | coding    |
| 0.305982   | noncoding |
| 0.419215   | noncoding |
| 0.0681206  | noncoding |
| 0.107927   | noncoding |
| 1          | coding    |
| 0.959089   | coding    |
| 0.959042   | coding    |
| 0.147607   | noncoding |
| 0.118749   | noncoding |
| 1          | coding    |
| 1          | coding    |
| 0.995954   | coding    |
| 1          | coding    |
| 1          | coding    |
| 1          | coding    |
| 0.177161   | noncoding |
| 0.88763    | coding    |
| 0.333346   | noncoding |
| 0.33728    | noncoding |
| 0.803456   | coding    |
| 0.0455389  | noncoding |
| 0.764096   | coding    |
| 0.0376644  | noncoding |
| 0.995449   | coding    |
| 0.999999   | coding    |
| 1          | coding    |
| 1          | coding    |
| 0.13184    | noncoding |
| 0.239744   | noncoding |
| 0.998746   | coding    |
| 0.355806   | noncoding |
| 0.10013    | noncoding |
| 0.0302648  | noncoding |
| 0.363276   | noncoding |
| 1          | coding    |
| 0.999993   | coding    |
| 0.137855   | noncoding |
| 0.41471    | noncoding |
| 0.793761   | coding    |
| 0.640614   | coding    |
| 0.876498   | coding    |
| 0.0092315  | noncoding |
| 0.988176   | coding    |
| 0.46046    | noncoding |
| 0.608463   | coding    |
| 1          | coding    |

|            |           |
|------------|-----------|
| 0.0798198  | noncoding |
| 1          | coding    |
| 0.142231   | noncoding |
| 1          | coding    |
| 0.0187193  | noncoding |
| 0.218538   | noncoding |
| 0.0114711  | noncoding |
| 0.0799516  | noncoding |
| 0.269745   | noncoding |
| 0.00930274 | noncoding |
| 0.0158048  | noncoding |
| 0.0138335  | noncoding |
| 0.580344   | coding    |
| 0.337615   | noncoding |
| 0.0324735  | noncoding |
| 0.483696   | noncoding |
| 0.100765   | noncoding |
| 0.0202706  | noncoding |
| 0.477304   | noncoding |
| 0.999983   | coding    |
| 0.999677   | coding    |
| 0.975753   | coding    |
| 0.158141   | noncoding |
| 0.618131   | coding    |
| 0.221516   | noncoding |
| 0.0963729  | noncoding |
| 0.221611   | noncoding |
| 1          | coding    |
| 1          | coding    |
| 1          | coding    |
| 0.0476995  | noncoding |
| 0.0884035  | noncoding |
| 0.999931   | coding    |
| 0.876556   | coding    |
| 0.999568   | coding    |
| 0.365255   | noncoding |
| 0.0117594  | noncoding |
| 0.0247579  | noncoding |
| 0.105305   | noncoding |
| 0.0285161  | noncoding |
| 0.19752    | noncoding |
| 0.649098   | coding    |
| 0.834835   | coding    |
| 0.709833   | coding    |
| 0.542942   | coding    |
| 0.94952    | coding    |
| 0.95156    | coding    |
| 0.157055   | noncoding |
| 0.326584   | noncoding |
| 0.0286091  | noncoding |
| 0.04089    | noncoding |
| 0.224186   | noncoding |
| 0.0287666  | noncoding |
| 0.0263477  | noncoding |

|           |           |
|-----------|-----------|
| 0.106743  | noncoding |
| 1         | coding    |
| 1         | coding    |
| 0.0436667 | noncoding |
| 0.0222715 | noncoding |
| 0.681409  | coding    |
| 0.47123   | noncoding |
| 0.0558523 | noncoding |
| 0.26211   | noncoding |
| 0.0506904 | noncoding |
| 0.466749  | noncoding |
| 0.147069  | noncoding |
| 0.597257  | coding    |
| 0.128159  | noncoding |
| 0.93249   | coding    |
| 0.874101  | coding    |
| 0.0428511 | noncoding |
| 0.172523  | noncoding |
| 0.0972787 | noncoding |
| 1         | coding    |
| 0.0268748 | noncoding |
| 0.210796  | noncoding |
| 0.763071  | coding    |
| 0.639066  | coding    |
| 1         | coding    |
| 0.999582  | coding    |
| 0.999908  | coding    |
| 0.0222451 | noncoding |
| 0.999995  | coding    |
| 0.331456  | noncoding |
| 0.378942  | noncoding |
| 0.565347  | coding    |
| 1         | coding    |
| 0.378942  | noncoding |
| 1         | coding    |
| 1         | coding    |
| 1         | coding    |
| 0.936118  | coding    |
| 0.0253769 | noncoding |
| 1         | coding    |
| 0.999325  | coding    |
| 1         | coding    |
| 0.923428  | coding    |

|           |           |
|-----------|-----------|
| 0.992017  | coding    |
| 0.518326  | coding    |
| 0.114641  | noncoding |
| 0.0169465 | noncoding |
| 0.0488512 | noncoding |
| 0.151111  | noncoding |
| 0.0109639 | noncoding |
| 0.312268  | noncoding |
| 0.169957  | noncoding |
| 0.764686  | coding    |
| 0.379942  | noncoding |
| 0.0253931 | noncoding |
| 0.058755  | noncoding |
| 0.119514  | noncoding |
| 1         | coding    |
| 0.988358  | coding    |
| 0.139681  | noncoding |
| 0.601024  | coding    |
| 0.229039  | noncoding |
| 1         | coding    |
| 0.723841  | coding    |
| 0.0378062 | noncoding |
| 1         | coding    |
| 0.020943  | noncoding |
| 0.0106773 | noncoding |
| 0.999179  | coding    |
| 1         | coding    |
| 1         | coding    |
| 0.999947  | coding    |
| 0.999914  | coding    |
| 1         | coding    |
| 1         | coding    |
| 0.99797   | coding    |
| 1         | coding    |
| 0.999832  | coding    |
| 0.999589  | coding    |
| 0.0119374 | noncoding |
| 0.999995  | coding    |
| 0.0773192 | noncoding |
| 0.378159  | noncoding |
| 0.0362393 | noncoding |
| 0.0235009 | noncoding |

|           |           |
|-----------|-----------|
| 0.0222866 | noncoding |
| 0.0212499 | noncoding |
| 0.117485  | noncoding |
| 0.997937  | coding    |
| 0.998064  | coding    |
| 0.998121  | coding    |
| 0.999956  | coding    |
| 0.0119716 | noncoding |
| 0.0617153 | noncoding |
| 0.0207515 | noncoding |
| 0.0204571 | noncoding |
| 0.0194281 | noncoding |
| 0.0266069 | noncoding |
| 0.0521269 | noncoding |
| 1         | coding    |
| 0.999874  | coding    |
| 0.0137828 | noncoding |
| 0.398116  | noncoding |
| 0.40556   | noncoding |
| 0.745988  | coding    |
| 0.989002  | coding    |
| 0.928496  | coding    |
| 0.870422  | coding    |
| 0.638485  | coding    |
| 0.997679  | coding    |
| 0.999704  | coding    |
| 0.999366  | coding    |
| 0.0271041 | noncoding |
| 0.822719  | coding    |
| 0.999999  | coding    |
| 0.0813444 | noncoding |
| 0.85895   | coding    |
| 1         | coding    |
| 0.99997   | coding    |
| 1         | coding    |
| 0.999945  | coding    |
| 1         | coding    |
| 1         | coding    |
| 0.999849  | coding    |
| 1         | coding    |
| 0.0853993 | noncoding |
| 0.424303  | noncoding |
| 0.105648  | noncoding |
| 0.122719  | noncoding |
| 1         | coding    |
| 0.999668  | coding    |
| 0.0322375 | noncoding |
| 0.0211735 | noncoding |

|           |           |
|-----------|-----------|
| 1         | coding    |
| 1         | coding    |
| 1         | coding    |
| 0.0767905 | noncoding |
| 0.999963  | coding    |
| 0.483099  | noncoding |
| 1         | coding    |
| 1         | coding    |
| 1         | coding    |
| 0.0361149 | noncoding |
| 0.148543  | noncoding |
| 1         | coding    |
| 1         | coding    |
| 1         | coding    |
| 0.0141557 | noncoding |
| 0.111141  | noncoding |
| 1         | coding    |
| 0.771626  | coding    |
| 0.87425   | coding    |
| 0.0936374 | noncoding |
| 0.994072  | coding    |
| 1         | coding    |
| 0.995484  | coding    |
| 0.0484219 | noncoding |
| 0.709047  | coding    |
| 0.0519153 | noncoding |
| 0.0208484 | noncoding |
| 0.994914  | coding    |
| 1         | coding    |
| 0.997052  | coding    |
| 1         | coding    |
| 0.258337  | noncoding |
| 0.783984  | coding    |
| 0.141692  | noncoding |
| 0.0424322 | noncoding |
| 1         | coding    |
| 0.0514868 | noncoding |
| 1         | coding    |
| 0.99984   | coding    |
| 0.0163799 | noncoding |
| 0.0573143 | noncoding |
| 1         | coding    |
| 0.015573  | noncoding |
| 0.0215954 | noncoding |
| 0.977092  | coding    |
| 0.995451  | coding    |
| 0.989679  | coding    |
| 0.128752  | noncoding |
| 0.999502  | coding    |
| 0.99913   | coding    |
| 0.999931  | coding    |
| 0.0154579 | noncoding |
| 0.433058  | noncoding |
| 0.0548506 | noncoding |



|            |           |
|------------|-----------|
| 0.103006   | noncoding |
| 0.0626383  | noncoding |
| 1          | coding    |
| 0.98926    | coding    |
| 0.994932   | coding    |
| 1          | coding    |
| 0.92349    | coding    |
| 1          | coding    |
| 1          | coding    |
| 0.997077   | coding    |
| 1          | coding    |
| 1          | coding    |
| 0.0280462  | noncoding |
| 0.0731553  | noncoding |
| 0.125651   | noncoding |
| 0.178599   | noncoding |
| 0.182628   | noncoding |
| 0.0418134  | noncoding |
| 0.00751938 | noncoding |
| 0.132775   | noncoding |
| 0.0698065  | noncoding |
| 0.99993    | coding    |
| 1          | coding    |
| 1          | coding    |
| 0.856167   | coding    |
| 0.518237   | coding    |
| 0.00752509 | noncoding |
| 0.178715   | noncoding |
| 0.0776566  | noncoding |
| 0.396709   | noncoding |
| 0.687733   | coding    |
| 0.0102734  | noncoding |
| 0.0672824  | noncoding |
| 0.359758   | noncoding |
| 0.893031   | coding    |
| 0.058336   | noncoding |
| 0.809974   | coding    |
| 0.319033   | noncoding |
| 0.400079   | noncoding |
| 0.181781   | noncoding |
| 0.939589   | coding    |
| 0.998574   | coding    |
| 0.222992   | noncoding |
| 0.19415    | noncoding |
| 0.101167   | noncoding |
| 0.102829   | noncoding |
| 0.062878   | noncoding |
| 0.147018   | noncoding |

|           |           |
|-----------|-----------|
| 0.0336787 | noncoding |
| 0.114457  | noncoding |
| 0.0484923 | noncoding |
| 0.999908  | coding    |
| 0.214141  | noncoding |
| 0.999955  | coding    |
| 0.999992  | coding    |
| 0.466439  | noncoding |
| 0.723355  | coding    |
| 0.18314   | noncoding |
| 0.644134  | coding    |
| 0.0976155 | noncoding |
| 0.791072  | coding    |
| 0.997396  | coding    |
| 0.977089  | coding    |
| 0.04445   | noncoding |
| 0.0337113 | noncoding |
| 1         | coding    |
| 0.852032  | coding    |
| 0.166067  | noncoding |
| 0.488615  | noncoding |
| 0.684279  | coding    |
| 0.0308698 | noncoding |
| 0.550952  | coding    |
| 0.551052  | coding    |
| 0.584644  | coding    |
| 0.067563  | noncoding |
| 0.0327555 | noncoding |
| 0.170743  | noncoding |
| 0.288487  | noncoding |
| 0.0537192 | noncoding |
| 0.0868756 | noncoding |
| 0.614893  | coding    |
| 0.503319  | coding    |
| 0.453323  | noncoding |
| 0.427701  | noncoding |
| 0.489445  | noncoding |
| 0.415582  | noncoding |
| 0.735862  | coding    |
| 0.35414   | noncoding |
| 0.346088  | noncoding |
| 0.616688  | coding    |
| 0.287018  | noncoding |
| 0.177864  | noncoding |
| 0.99987   | coding    |
| 1         | coding    |
| 0.999999  | coding    |
| 0.143615  | noncoding |
| 0.0321089 | noncoding |
| 1         | coding    |
| 0.0272988 | noncoding |
| 0.951228  | coding    |
| 1         | coding    |
| 0.024777  | noncoding |

|           |           |
|-----------|-----------|
| 0.182315  | noncoding |
| 0.0542814 | noncoding |
| 0.999999  | coding    |
| 0.999889  | coding    |
| 0.124632  | noncoding |
| 1         | coding    |
| 0.104687  | noncoding |
| 0.0301495 | noncoding |
| 0.999955  | coding    |
| 1         | coding    |
| 0.0133502 | noncoding |
| 0.999304  | coding    |
| 0.999304  | coding    |
| 1         | coding    |
| 0.387932  | noncoding |
| 1         | coding    |
| 0.955852  | coding    |
| 0.154197  | noncoding |
| 0.0505511 | noncoding |
| 1         | coding    |
| 1         | coding    |
| 1         | coding    |
| 0.375286  | noncoding |
| 0.0433628 | noncoding |
| 0.0240303 | noncoding |
| 0.937181  | coding    |
| 0.569305  | coding    |
| 1         | coding    |
| 0.999987  | coding    |
| 0.468431  | noncoding |
| 1         | coding    |
| 0.0165177 | noncoding |
| 0.0481136 | noncoding |
| 0.999932  | coding    |
| 1         | coding    |
| 0.998309  | coding    |
| 0.0252664 | noncoding |
| 0.494041  | noncoding |
| 0.274587  | noncoding |
| 0.936077  | coding    |
| 0.0533182 | noncoding |
| 0.29381   | noncoding |
| 0.077572  | noncoding |
| 0.0129377 | noncoding |
| 0.303546  | noncoding |
| 0.322967  | noncoding |
| 1         | coding    |
| 0.933129  | coding    |
| 0.93358   | coding    |
| 1         | coding    |
| 0.229451  | noncoding |

|            |           |
|------------|-----------|
| 0.225745   | noncoding |
| 1          | coding    |
| 1          | coding    |
| 0.0429523  | noncoding |
| 0.946217   | coding    |
| 0.566976   | coding    |
| 0.13257    | noncoding |
| 0.46248    | noncoding |
| 0.949693   | coding    |
| 0.153857   | noncoding |
| 0.109261   | noncoding |
| 0.052421   | noncoding |
| 0.0512735  | noncoding |
| 0.582035   | coding    |
| 0.964192   | coding    |
| 0.4417     | noncoding |
| 0.391981   | noncoding |
| 0.234706   | noncoding |
| 0.00696806 | noncoding |
| 0.18682    | noncoding |
| 0.208555   | noncoding |
| 0.0481916  | noncoding |
| 0.119441   | noncoding |
| 0.999415   | coding    |
| 1          | coding    |
| 0.0164352  | noncoding |
| 0.0685403  | noncoding |
| 0.922991   | coding    |
| 0.0634098  | noncoding |
| 1          | coding    |
| 1          | coding    |
| 0.0255354  | noncoding |
| 0.216577   | noncoding |
| 0.0338748  | noncoding |
| 0.99381    | coding    |
| 1          | coding    |
| 0.0636498  | noncoding |
| 1          | coding    |
| 1          | coding    |
| 0.999418   | coding    |
| 0.999418   | coding    |
| 0.999418   | coding    |
| 0.999971   | coding    |
| 0.999108   | coding    |
| 0.29413    | noncoding |
| 0.999997   | coding    |
| 1          | coding    |
| 0.11633    | noncoding |
| 0.999995   | coding    |
| 0.999999   | coding    |
| 0.999953   | coding    |
| 0.99999    | coding    |
| 0.99999    | coding    |
| 0.99997    | coding    |

|            |           |
|------------|-----------|
| 1          | coding    |
| 1          | coding    |
| 0.00379481 | noncoding |
| 0.909915   | coding    |
| 1          | coding    |
| 0.999998   | coding    |
| 0.999961   | coding    |
| 1          | coding    |
| 0.0419582  | noncoding |
| 0.169391   | noncoding |
| 0.160672   | noncoding |
| 0.169391   | noncoding |
| 0.996564   | coding    |
| 0.0317535  | noncoding |
| 0.998987   | coding    |
| 0.0715847  | noncoding |
| 0.999046   | coding    |
| 0.0867246  | noncoding |
| 1          | coding    |
| 0.999877   | coding    |
| 0.999862   | coding    |
| 0.999991   | coding    |
| 1          | coding    |
| 1          | coding    |
| 1          | coding    |
| 0.988603   | coding    |
| 0.838825   | coding    |
| 0.999442   | coding    |
| 0.999795   | coding    |
| 0.0190264  | noncoding |
| 0.110215   | noncoding |
| 0.0284901  | noncoding |
| 0.475036   | noncoding |
| 0.999868   | coding    |
| 0.980809   | coding    |
| 0.102385   | noncoding |
| 0.99955    | coding    |
| 0.99955    | coding    |
| 1          | coding    |
| 1          | coding    |
| 0.999999   | coding    |
| 0.999999   | coding    |
| 0.999404   | coding    |
| 0.0693175  | noncoding |
| 1          | coding    |

|           |           |
|-----------|-----------|
| 1         | coding    |
| 0.0239158 | noncoding |
| 1         | coding    |
| 1         | coding    |
| 1         | coding    |
| 0.0119914 | noncoding |
| 1         | coding    |
| 1         | coding    |
| 0.788845  | coding    |
| 1         | coding    |
| 1         | coding    |
| 0.042323  | noncoding |
| 0.0925868 | noncoding |
| 0.926873  | coding    |
| 1         | coding    |
| 0.876731  | coding    |
| 0.992981  | coding    |
| 0.291283  | noncoding |
| 0.662927  | coding    |
| 0.0909257 | noncoding |
| 0.242564  | noncoding |
| 0.170998  | noncoding |
| 0.947273  | coding    |
| 0.83599   | coding    |
| 1         | coding    |
| 0.854553  | coding    |
| 0.291346  | noncoding |
| 0.999997  | coding    |
| 0.99999   | coding    |
| 0.0113599 | noncoding |
| 0.99998   | coding    |
| 0.063272  | noncoding |
| 0.0278511 | noncoding |
| 0.682565  | coding    |
| 1         | coding    |
| 0.230564  | noncoding |
| 0.362987  | noncoding |
| 0.362987  | noncoding |
| 1         | coding    |
| 0.0459009 | noncoding |
| 0.0400318 | noncoding |
| 1         | coding    |
| 1         | coding    |
| 0.0321275 | noncoding |
| 1         | coding    |
| 0.140289  | noncoding |
| 0.960862  | coding    |
| 0.146318  | noncoding |
| 0.995625  | coding    |
| 0.888747  | coding    |
| 0.996836  | coding    |
| 0.996938  | coding    |
| 0.999948  | coding    |
| 0.999947  | coding    |

|           |           |
|-----------|-----------|
| 0.551644  | coding    |
| 0.0135293 | noncoding |
| 0.999928  | coding    |
| 1         | coding    |
| 0.43671   | noncoding |
| 0.561874  | coding    |
| 0.433956  | noncoding |
| 1         | coding    |
| 1         | coding    |
| 1         | coding    |
| 0.0638043 | noncoding |
| 0.0464895 | noncoding |
| 0.173039  | noncoding |
| 0.0742855 | noncoding |
| 0.0455044 | noncoding |
| 0.0404458 | noncoding |
| 0.154173  | noncoding |
| 0.146268  | noncoding |
| 0.542107  | coding    |
| 1         | coding    |
| 1         | coding    |
| 1         | coding    |
| 0.444854  | noncoding |
| 0.0120793 | noncoding |
| 0.0839515 | noncoding |
| 0.0470503 | noncoding |
| 1         | coding    |
| 0.0361374 | noncoding |
| 1         | coding    |
| 1         | coding    |
| 0.0928094 | noncoding |
| 1         | coding    |
| 0.999952  | coding    |
| 1         | coding    |
| 1         | coding    |
| 0.999999  | coding    |
| 0.0740194 | noncoding |
| 1         | coding    |
| 0.33528   | noncoding |
| 0.275176  | noncoding |
| 0.371782  | noncoding |
| 0.14401   | noncoding |
| 0.0866285 | noncoding |
| 0.0499296 | noncoding |
| 0.0275947 | noncoding |
| 0.102408  | noncoding |
| 0.999089  | coding    |
| 0.999942  | coding    |
| 0.999999  | coding    |
| 0.996335  | coding    |
| 0.51675   | coding    |
| 0.0132416 | noncoding |
| 0.0140298 | noncoding |
| 0.998376  | coding    |

|           |           |
|-----------|-----------|
| 1         | coding    |
| 0.999942  | coding    |
| 0.0606757 | noncoding |
| 0.0168241 | noncoding |
| 0.789774  | coding    |
| 0.130766  | noncoding |
| 0.38861   | noncoding |
| 0.149283  | noncoding |
| 0.19423   | noncoding |
| 1         | coding    |
| 1         | coding    |
| 1         | coding    |
| 0.0934736 | noncoding |
| 0.0209303 | noncoding |
| 0.0208206 | noncoding |
| 1         | coding    |
| 0.993591  | coding    |
| 1         | coding    |
| 1         | coding    |
| 0.991625  | coding    |
| 0.954624  | coding    |
| 0.991103  | coding    |
| 0.909099  | coding    |
| 0.991103  | coding    |
| 0.911023  | coding    |
| 0.991997  | coding    |
| 0.0586597 | noncoding |
| 1         | coding    |
| 0.156582  | noncoding |
| 0.0758733 | noncoding |
| 0.0118995 | noncoding |
| 0.999783  | coding    |
| 0.0128565 | noncoding |
| 1         | coding    |
| 0.113014  | noncoding |
| 0.0286608 | noncoding |
| 1         | coding    |
| 1         | coding    |
| 0.998764  | coding    |
| 0.029522  | noncoding |
| 0.0903752 | noncoding |
| 0.870881  | coding    |
| 0.577637  | coding    |
| 0.122308  | noncoding |
| 0.124961  | noncoding |
| 0.919474  | coding    |



|           |           |
|-----------|-----------|
| 0.73242   | coding    |
| 0.934188  | coding    |
| 0.0519711 | noncoding |
| 0.58939   | coding    |
| 0.084258  | noncoding |
| 0.369149  | noncoding |
| 0.999998  | coding    |
| 0.882972  | coding    |
| 0.238318  | noncoding |
| 0.0575585 | noncoding |
| 0.0160177 | noncoding |
| 0.999398  | coding    |
| 1         | coding    |
| 1         | coding    |
| 1         | coding    |
| 0.0787493 | noncoding |
| 0.457208  | noncoding |
| 0.998641  | coding    |
| 0.948207  | coding    |
| 0.930965  | coding    |
| 0.982824  | coding    |
| 0.982824  | coding    |
| 0.933981  | coding    |
| 0.0452222 | noncoding |
| 0.0330296 | noncoding |
| 0.0122775 | noncoding |
| 0.999987  | coding    |
| 0.999998  | coding    |
| 1         | coding    |
| 0.103344  | noncoding |
| 0.0413034 | noncoding |
| 0.0539228 | noncoding |
| 0.0670011 | noncoding |
| 0.0591431 | noncoding |
| 0.0135117 | noncoding |
| 0.280313  | noncoding |
| 0.0881585 | noncoding |
| 0.0428306 | noncoding |
| 0.0423851 | noncoding |
| 0.0426192 | noncoding |
| 0.0744191 | noncoding |
| 1         | coding    |
| 0.0422454 | noncoding |
| 0.999995  | coding    |
| 0.165306  | noncoding |
| 0.0418453 | noncoding |
| 0.4771    | noncoding |
| 0.495436  | noncoding |
| 0.0700663 | noncoding |
| 1         | coding    |

|            |           |
|------------|-----------|
| 1          | coding    |
| 0.943678   | coding    |
| 0.141289   | noncoding |
| 1          | coding    |
| 0.501349   | coding    |
| 1          | coding    |
| 1          | coding    |
| 0.0797763  | noncoding |
| 0.0653611  | noncoding |
| 0.57291    | coding    |
| 0.0563865  | noncoding |
| 1          | coding    |
| 0.999783   | coding    |
| 0.999999   | coding    |
| 1          | coding    |
| 0.999948   | coding    |
| 0.00862545 | noncoding |
| 0.999992   | coding    |
| 0.100814   | noncoding |
| 0.0291621  | noncoding |
| 0.23875    | noncoding |
| 0.484872   | noncoding |
| 0.892715   | coding    |
| 0.970912   | coding    |
| 0.103997   | noncoding |
| 0.00890878 | noncoding |
| 0.0103101  | noncoding |
| 0.0346366  | noncoding |
| 0.0172574  | noncoding |
| 0.0306976  | noncoding |
| 0.0312844  | noncoding |
| 0.0852501  | noncoding |
| 0.141475   | noncoding |
| 0.110849   | noncoding |
| 0.0817881  | noncoding |
| 0.0817105  | noncoding |
| 0.0356035  | noncoding |
| 0.0408528  | noncoding |
| 0.0184981  | noncoding |
| 0.043582   | noncoding |
| 0.0209898  | noncoding |
| 0.0093062  | noncoding |
| 0.0975794  | noncoding |
| 0.163195   | noncoding |
| 0.103767   | noncoding |
| 0.0643641  | noncoding |
| 0.0733971  | noncoding |
| 0.462272   | noncoding |
| 1          | coding    |
| 1          | coding    |
| 0.0474218  | noncoding |
| 1          | coding    |
| 1          | coding    |
| 1          | coding    |

|            |           |
|------------|-----------|
| 0.277708   | noncoding |
| 0.0137769  | noncoding |
| 1          | coding    |
| 0.209744   | noncoding |
| 1          | coding    |
| 1          | coding    |
| 0.376646   | noncoding |
| 1          | coding    |
| 1          | coding    |
| 0.312313   | noncoding |
| 0.0652412  | noncoding |
| 1          | coding    |
| 0.999996   | coding    |
| 1          | coding    |
| 0.0739165  | noncoding |
| 0.0565016  | noncoding |
| 0.00894749 | noncoding |
| 0.875998   | coding    |
| 0.180157   | noncoding |
| 0.980714   | coding    |
| 1          | coding    |
| 0.99999    | coding    |
| 0.981498   | coding    |
| 0.999999   | coding    |
| 1          | coding    |
| 0.104496   | noncoding |
| 0.056383   | noncoding |
| 0.534051   | coding    |
| 0.205093   | noncoding |
| 0.0268458  | noncoding |
| 0.212402   | noncoding |
| 0.736996   | coding    |
| 1          | coding    |
| 0.21648    | noncoding |
| 0.234423   | noncoding |
| 0.201639   | noncoding |
| 0.0924304  | noncoding |
| 0.711807   | coding    |
| 1          | coding    |
| 1          | coding    |
| 0.121523   | noncoding |
| 0.123729   | noncoding |
| 0.969501   | coding    |
| 0.115553   | noncoding |
| 0.997521   | coding    |
| 0.0458789  | noncoding |
| 0.363953   | noncoding |
| 0.999932   | coding    |
| 1          | coding    |

[illegible]

|           |           |
|-----------|-----------|
| 1         | coding    |
| 0.0410036 | noncoding |
| 0.954147  | coding    |
| 1         | coding    |
| 0.0059171 | noncoding |
| 0.066315  | noncoding |
| 0.297644  | noncoding |
| 0.218971  | noncoding |
| 1         | coding    |
| 0.999997  | coding    |
| 0.999999  | coding    |
| 0.882529  | coding    |
| 0.356406  | noncoding |
| 0.0465758 | noncoding |
| 0.0721343 | noncoding |
| 0.256322  | noncoding |
| 0.125051  | noncoding |
| 0.999997  | coding    |
| 0.999857  | coding    |
| 0.995009  | coding    |
| 0.15924   | noncoding |
| 0.0353423 | noncoding |
| 1         | coding    |
| 0.999951  | coding    |
| 0.930821  | coding    |
| 1         | coding    |
| 0.902846  | coding    |
| 0.330292  | noncoding |
| 0.282189  | noncoding |
| 0.22395   | noncoding |
| 0.252752  | noncoding |
| 0.786745  | coding    |
| 0.999972  | coding    |

|           |           |
|-----------|-----------|
| 0.999996  | coding    |
| 0.999994  | coding    |
| 1         | coding    |
| 0.919928  | coding    |
| 1         | coding    |
| 0.596885  | coding    |
| 0.0337361 | noncoding |
| 1         | coding    |
| 0.989679  | coding    |
| 0.971348  | coding    |
| 0.993378  | coding    |
| 0.977737  | coding    |
| 0.994126  | coding    |
| 0.172834  | noncoding |
| 0.999985  | coding    |
| 1         | coding    |
| 1         | coding    |
| 0.996411  | coding    |
| 0.998058  | coding    |
| 1         | coding    |
| 0.0630136 | noncoding |
| 0.091436  | noncoding |
| 0.999842  | coding    |
| 1         | coding    |
| 0.0341238 | noncoding |
| 0.0654898 | noncoding |
| 0.0442238 | noncoding |
| 0.996546  | coding    |
| 1         | coding    |
| 0.998914  | coding    |
| 0.258932  | noncoding |
| 0.992489  | coding    |
| 0.459851  | noncoding |
| 0.551164  | coding    |
| 0.575982  | coding    |
| 0.103749  | noncoding |
| 0.15371   | noncoding |
| 0.999934  | coding    |
| 0.99981   | coding    |

|            |           |
|------------|-----------|
| 0.901362   | coding    |
| 1          | coding    |
| 0.0850091  | noncoding |
| 1          | coding    |
| 0.999999   | coding    |
| 1          | coding    |
| 1          | coding    |
| 0.932254   | coding    |
| 1          | coding    |
| 0.999999   | coding    |
| 0.999928   | coding    |
| 1          | coding    |
| 0.933374   | coding    |
| 1          | coding    |
| 0.0431292  | noncoding |
| 1          | coding    |
| 1          | coding    |
| 1          | coding    |
| 0.326719   | noncoding |
| 0.138082   | noncoding |
| 0.111964   | noncoding |
| 0.00837788 | noncoding |
| 0.997116   | coding    |
| 0.257222   | noncoding |
| 0.963704   | coding    |
| 0.831163   | coding    |
| 1          | coding    |
| 0.999973   | coding    |
| 1          | coding    |
| 1          | coding    |
| 1          | coding    |
| 0.143548   | noncoding |
| 0.271134   | noncoding |
| 1          | coding    |
| 1          | coding    |
| 0.132105   | noncoding |
| 1          | coding    |
| 0.95056    | coding    |
| 0.974534   | coding    |
| 0.999998   | coding    |
| 0.999137   | coding    |
| 1          | coding    |
| 0.999999   | coding    |
| 1          | coding    |
| 0.0208113  | noncoding |
| 0.0117497  | noncoding |
| 0.0116877  | noncoding |
| 0.0170441  | noncoding |
| 0.0140646  | noncoding |
| 0.0660343  | noncoding |
| 0.220278   | noncoding |

|           |           |
|-----------|-----------|
| 0.522303  | coding    |
| 0.999409  | coding    |
| 0.999926  | coding    |
| 0.998449  | coding    |
| 0.996894  | coding    |
| 0.995557  | coding    |
| 0.99914   | coding    |
| 0.999998  | coding    |
| 1         | coding    |
| 1         | coding    |
| 1         | coding    |
| 0.610574  | coding    |
| 0.477793  | noncoding |
| 0.0923196 | noncoding |
| 0.989475  | coding    |
| 1         | coding    |
| 1         | coding    |
| 1         | coding    |
| 0.301536  | noncoding |
| 0.293083  | noncoding |
| 0.18819   | noncoding |
| 0.0169803 | noncoding |
| 0.188456  | noncoding |
| 0.0484358 | noncoding |
| 0.217551  | noncoding |
| 0.999396  | coding    |
| 0.0203071 | noncoding |
| 0.0105948 | noncoding |
| 1         | coding    |
| 1         | coding    |
| 1         | coding    |
| 0.2753    | noncoding |
| 1         | coding    |
| 0.471516  | noncoding |
| 0.488077  | noncoding |
| 0.844473  | coding    |
| 0.835659  | coding    |
| 0.33187   | noncoding |
| 0.56386   | coding    |
| 1         | coding    |
| 0.93092   | coding    |
| 0.991465  | coding    |
| 0.998756  | coding    |
| 0.139306  | noncoding |
| 0.722387  | coding    |
| 0.975636  | coding    |
| 0.938354  | coding    |
| 0.901208  | coding    |
| 0.822252  | coding    |



|           |           |
|-----------|-----------|
| 0.215564  | noncoding |
| 0.943987  | coding    |
| 0.935617  | coding    |
| 1         | coding    |
| 0.997543  | coding    |
| 0.999035  | coding    |
| 1         | coding    |
| 0.0988619 | noncoding |
| 1         | coding    |
| 1         | coding    |
| 1         | coding    |
| 0.828751  | coding    |
| 0.954842  | coding    |
| 1         | coding    |
| 1         | coding    |
| 0.993522  | coding    |
| 0.262093  | noncoding |
| 1         | coding    |
| 0.945705  | coding    |
| 0.721891  | coding    |
| 0.174915  | noncoding |
| 0.839218  | coding    |
| 0.0414625 | noncoding |
| 1         | coding    |
| 0.0285677 | noncoding |
| 0.0307231 | noncoding |
| 0.990434  | coding    |
| 0.999999  | coding    |
| 0.0381011 | noncoding |
| 0.999999  | coding    |
| 0.0386043 | noncoding |
| 1         | coding    |
| 0.199541  | noncoding |
| 1         | coding    |
| 0.0516656 | noncoding |
| 0.0312629 | noncoding |
| 0.467064  | noncoding |
| 1         | coding    |
| 0.999996  | coding    |
| 0.0558555 | noncoding |

|            |           |
|------------|-----------|
| 1          | coding    |
| 0.0661728  | noncoding |
| 1          | coding    |
| 0.998478   | coding    |
| 1          | coding    |
| 1          | coding    |
| 0.265608   | noncoding |
| 0.963852   | coding    |
| 0.187004   | noncoding |
| 1          | coding    |
| 0.995797   | coding    |
| 0.917205   | coding    |
| 0.175649   | noncoding |
| 0.0213101  | noncoding |
| 1          | coding    |
| 1          | coding    |
| 1          | coding    |
| 0.747589   | coding    |
| 0.745764   | coding    |
| 0.00589845 | noncoding |
| 1          | coding    |
| 1          | coding    |
| 0.519692   | coding    |
| 0.19957    | noncoding |
| 1          | coding    |
| 0.976887   | coding    |
| 1          | coding    |
| 1          | coding    |
| 1          | coding    |
| 0.685585   | coding    |
| 0.676695   | coding    |
| 0.98733    | coding    |
| 0.0230575  | noncoding |
| 0.157595   | noncoding |
| 0.999983   | coding    |
| 1          | coding    |
| 0.999999   | coding    |
| 1          | coding    |
| 0.0586192  | noncoding |
| 0.980825   | coding    |
| 0.999744   | coding    |

|           |           |
|-----------|-----------|
| 0.151682  | noncoding |
| 1         | coding    |
| 1         | coding    |
| 0.0625855 | noncoding |
| 0.0167907 | noncoding |
| 0.999634  | coding    |
| 0.999639  | coding    |
| 0.92237   | coding    |
| 0.92237   | coding    |
| 0.904208  | coding    |
| 0.217441  | noncoding |
| 0.631161  | coding    |
| 0.108544  | noncoding |
| 0.132138  | noncoding |
| 0.213032  | noncoding |
| 0.0138042 | noncoding |
| 0.051862  | noncoding |
| 0.0808917 | noncoding |
| 0.889722  | coding    |
| 0.191577  | noncoding |
| 0.0684478 | noncoding |
| 0.972411  | coding    |
| 0.999836  | coding    |
| 0.440561  | noncoding |
| 0.637591  | coding    |
| 0.17849   | noncoding |
| 0.17849   | noncoding |
| 0.120765  | noncoding |
| 0.202183  | noncoding |
| 1         | coding    |
| 0.999993  | coding    |
| 1         | coding    |
| 0.0314569 | noncoding |
| 1         | coding    |
| 0.999995  | coding    |
| 0.99999   | coding    |
| 0.999995  | coding    |
| 1         | coding    |
| 0.999999  | coding    |
| 0.999999  | coding    |
| 0.0169224 | noncoding |
| 1         | coding    |
| 1         | coding    |
| 1         | coding    |

|           |           |
|-----------|-----------|
| 0.0465156 | noncoding |
| 1         | coding    |
| 0.0704247 | noncoding |
| 1         | coding    |
| 0.122443  | noncoding |
| 0.173514  | noncoding |
| 0.891191  | coding    |
| 0.343252  | noncoding |
| 0.0187815 | noncoding |
| 0.0381493 | noncoding |
| 1         | coding    |
| 0.139369  | noncoding |
| 0.255548  | noncoding |
| 0.224939  | noncoding |
| 0.224939  | noncoding |
| 0.237593  | noncoding |
| 0.30198   | noncoding |
| 0.0221883 | noncoding |
| 0.0232927 | noncoding |
| 0.0235621 | noncoding |
| 0.15941   | noncoding |
| 0.0410623 | noncoding |
| 0.0315708 | noncoding |
| 0.240315  | noncoding |
| 0.191638  | noncoding |
| 0.0388743 | noncoding |
| 0.0700687 | noncoding |
| 0.0527601 | noncoding |
| 0.02812   | noncoding |
| 0.242632  | noncoding |
| 0.0385721 | noncoding |
| 0.795498  | coding    |
| 0.276995  | noncoding |
| 0.103931  | noncoding |
| 0.276995  | noncoding |
| 1         | coding    |
| 1         | coding    |
| 0.994147  | coding    |
| 1         | coding    |
| 1         | coding    |
| 1         | coding    |
| 0.664098  | coding    |
| 0.755619  | coding    |
| 0.946517  | coding    |
| 0.0234175 | noncoding |
| 0.5398    | coding    |
| 0.136317  | noncoding |
| 0.37867   | noncoding |
| 1         | coding    |
| 0.503401  | coding    |

|            |           |
|------------|-----------|
| 1          | coding    |
| 1          | coding    |
| 1          | coding    |
| 0.514122   | coding    |
| 1          | coding    |
| 0.376717   | noncoding |
| 1          | coding    |
| 1          | coding    |
| 0.0206827  | noncoding |
| 0.0605167  | noncoding |
| 1          | coding    |
| 0.0222786  | noncoding |
| 0.933596   | coding    |
| 0.0708627  | noncoding |
| 1          | coding    |
| 1          | coding    |
| 0.0440428  | noncoding |
| 0.0883967  | noncoding |
| 0.487341   | noncoding |
| 1          | coding    |
| 1          | coding    |
| 0.999995   | coding    |
| 0.0671815  | noncoding |
| 0.220018   | noncoding |
| 0.225419   | noncoding |
| 0.225419   | noncoding |
| 1          | coding    |
| 0.999991   | coding    |
| 1          | coding    |
| 1          | coding    |
| 0.0883299  | noncoding |
| 0.999925   | coding    |
| 0.997796   | coding    |
| 1          | coding    |
| 0.709572   | coding    |
| 1          | coding    |
| 0.998615   | coding    |
| 1          | coding    |
| 0.977292   | coding    |
| 0.998311   | coding    |
| 0.998637   | coding    |
| 0.977292   | coding    |
| 0.999983   | coding    |
| 0.037411   | noncoding |
| 0.00358371 | noncoding |

|           |           |
|-----------|-----------|
| 1         | coding    |
| 1         | coding    |
| 0.39746   | noncoding |
| 0.206623  | noncoding |
| 0.0365264 | noncoding |
| 1         | coding    |
| 0.999999  | coding    |
| 1         | coding    |
| 0.0958307 | noncoding |
| 0.154649  | noncoding |
| 0.0613844 | noncoding |
| 0.999833  | coding    |
| 0.999902  | coding    |
| 1         | coding    |
| 0.0499571 | noncoding |
| 0.155763  | noncoding |
| 0.0219577 | noncoding |
| 0.0217238 | noncoding |
| 0.0210587 | noncoding |
| 0.0983982 | noncoding |
| 1         | coding    |
| 1         | coding    |
| 1         | coding    |
| 0.999992  | coding    |
| 1         | coding    |
| 0.999909  | coding    |
| 0.982668  | coding    |
| 0.99986   | coding    |
| 0.0305827 | noncoding |
| 1         | coding    |
| 0.999181  | coding    |
| 1         | coding    |
| 0.0167119 | noncoding |
| 0.246919  | noncoding |
| 0.999998  | coding    |
| 0.0768043 | noncoding |
| 0.999994  | coding    |
| 0.178219  | noncoding |
| 0.999028  | coding    |
| 1         | coding    |
| 0.0428224 | noncoding |
| 0.185557  | noncoding |
| 0.0426892 | noncoding |

[illegible]

|            |           |
|------------|-----------|
| 1          | coding    |
| 1          | coding    |
| 0.987077   | coding    |
| 0.999836   | coding    |
| 0.0800589  | noncoding |
| 0.0137639  | noncoding |
| 0.0836692  | noncoding |
| 1          | coding    |
| 1          | coding    |
| 1          | coding    |
| 0.997442   | coding    |
| 0.999999   | coding    |
| 1          | coding    |
| 0.0414396  | noncoding |
| 1          | coding    |
| 1          | coding    |
| 0.0490892  | noncoding |
| 0.0511468  | noncoding |
| 0.00880244 | noncoding |
| 1          | coding    |
| 1          | coding    |
| 0.969607   | coding    |
| 0.965818   | coding    |
| 1          | coding    |
| 0.148498   | noncoding |
| 1          | coding    |
| 1          | coding    |
| 0.105747   | noncoding |
| 0.979248   | coding    |
| 0.945624   | coding    |
| 0.928569   | coding    |
| 0.933007   | coding    |
| 1          | coding    |
| 0.609287   | coding    |
| 0.10347    | noncoding |
| 1          | coding    |



|            |           |
|------------|-----------|
| 1          | coding    |
| 0.0234268  | noncoding |
| 1          | coding    |
| 1          | coding    |
| 0.0647127  | noncoding |
| 0.998938   | coding    |
| 0.00481813 | noncoding |
| 1          | coding    |
| 1          | coding    |
| 0.999991   | coding    |
| 1          | coding    |
| 0.265257   | noncoding |
| 0.135389   | noncoding |
| 0.237733   | noncoding |
| 1          | coding    |
| 1          | coding    |
| 1          | coding    |
| 0.0603945  | noncoding |
| 0.969513   | coding    |
| 0.215526   | noncoding |
| 0.158049   | noncoding |
| 0.998469   | coding    |
| 1          | coding    |
| 0.981001   | coding    |
| 1          | coding    |
| 0.973297   | coding    |
| 1          | coding    |
| 0.12436    | noncoding |
| 0.966084   | coding    |
| 0.999942   | coding    |
| 0.997674   | coding    |
| 0.217221   | noncoding |
| 1          | coding    |
| 0.999976   | coding    |
| 1          | coding    |
| 0.999939   | coding    |
| 0.999961   | coding    |
| 0.999998   | coding    |
| 1          | coding    |
| 1          | coding    |

|           |           |
|-----------|-----------|
| 1         | coding    |
| 0.0732808 | noncoding |
| 0.999981  | coding    |
| 0.999985  | coding    |
| 1         | coding    |
| 1         | coding    |
| 0.998923  | coding    |
| 0.99979   | coding    |
| 1         | coding    |
| 1         | coding    |
| 0.877795  | coding    |
| 1         | coding    |
| 0.0669214 | noncoding |
| 0.496515  | noncoding |
| 0.158528  | noncoding |
| 0.0652423 | noncoding |
| 1         | coding    |
| 0.0358073 | noncoding |
| 0.0244191 | noncoding |
| 1         | coding    |
| 0.934769  | coding    |
| 1         | coding    |
| 1         | coding    |
| 1         | coding    |
| 0.991293  | coding    |
| 0.0547623 | noncoding |
| 1         | coding    |
| 0.331621  | noncoding |
| 0.26129   | noncoding |
| 0.236629  | noncoding |
| 0.283145  | noncoding |
| 0.708998  | coding    |
| 0.905146  | coding    |
| 0.975677  | coding    |

|            |           |
|------------|-----------|
| 0.903765   | coding    |
| 0.425068   | noncoding |
| 0.974348   | coding    |
| 0.97695    | coding    |
| 1          | coding    |
| 1          | coding    |
| 0.997681   | coding    |
| 0.579607   | coding    |
| 0.998833   | coding    |
| 1          | coding    |
| 0.999988   | coding    |
| 0.360617   | noncoding |
| 0.32921    | noncoding |
| 0.349611   | noncoding |
| 0.349611   | noncoding |
| 0.229906   | noncoding |
| 0.586634   | coding    |
| 1          | coding    |
| 0.528832   | coding    |
| 0.0680645  | noncoding |
| 0.733262   | coding    |
| 0.377827   | noncoding |
| 1          | coding    |
| 1          | coding    |
| 0.991966   | coding    |
| 1          | coding    |
| 0.151501   | noncoding |
| 0.1151     | noncoding |
| 0.166009   | noncoding |
| 0.290423   | noncoding |
| 0.187164   | noncoding |
| 0.0669511  | noncoding |
| 0.273597   | noncoding |
| 0.117638   | noncoding |
| 0.693579   | coding    |
| 0.103982   | noncoding |
| 0.0544648  | noncoding |
| 0.994455   | coding    |
| 0.999997   | coding    |
| 0.98967    | coding    |
| 0.98967    | coding    |
| 0.795239   | coding    |
| 0.485424   | noncoding |
| 0.0267248  | noncoding |
| 0.999942   | coding    |
| 1          | coding    |
| 1          | coding    |
| 1          | coding    |
| 0.101353   | noncoding |
| 0.102014   | noncoding |
| 1          | coding    |
| 0.263225   | noncoding |
| 0.0112508  | noncoding |
| 0.00193054 | noncoding |

|            |           |
|------------|-----------|
| 0.0226632  | noncoding |
| 0.00204047 | noncoding |
| 0.00323993 | noncoding |
| 0.00446321 | noncoding |
| 0.0089764  | noncoding |
| 0.00745153 | noncoding |
| 0.0261928  | noncoding |
| 0.0278957  | noncoding |
| 0.997685   | coding    |
| 0.130691   | noncoding |
| 0.120191   | noncoding |
| 0.129141   | noncoding |
| 0.0227991  | noncoding |
| 0.0189594  | noncoding |
| 0.715157   | coding    |
| 0.399727   | noncoding |
| 0.0055529  | noncoding |
| 0.0384596  | noncoding |
| 0.021435   | noncoding |
| 0.078031   | noncoding |
| 0.0672295  | noncoding |
| 0.0210771  | noncoding |
| 0.118675   | noncoding |
| 0.0835054  | noncoding |
| 0.030554   | noncoding |
| 0.0583155  | noncoding |
| 0.0647549  | noncoding |
| 0.0939869  | noncoding |
| 0.922085   | coding    |
| 0.923134   | coding    |
| 0.151667   | noncoding |
| 0.147042   | noncoding |
| 0.170407   | noncoding |
| 0.191794   | noncoding |
| 0.124749   | noncoding |
| 0.167143   | noncoding |
| 0.188814   | noncoding |
| 0.0144885  | noncoding |
| 0.999999   | coding    |
| 0.0120315  | noncoding |
| 0.0182219  | noncoding |
| 0.0387485  | noncoding |
| 0.0162271  | noncoding |
| 0.993534   | coding    |
| 0.665833   | coding    |
| 0.990359   | coding    |
| 0.999977   | coding    |
| 0.999998   | coding    |
| 0.999582   | coding    |
| 0.0353683  | noncoding |
| 0.0233149  | noncoding |
| 0.0233149  | noncoding |
| 0.243038   | noncoding |
| 0.0174901  | noncoding |

|             |           |
|-------------|-----------|
| 0.0323972   | noncoding |
| 0.0161723   | noncoding |
| 0.112111    | noncoding |
| 0.0826964   | noncoding |
| 0.0826964   | noncoding |
| 0.0826964   | noncoding |
| 0.0283704   | noncoding |
| 0.108804    | noncoding |
| 0.118929    | noncoding |
| 0.18883     | noncoding |
| 0.260782    | noncoding |
| 0.0321816   | noncoding |
| 0.01594     | noncoding |
| 0.0146142   | noncoding |
| 0.0656236   | noncoding |
| 0.11023     | noncoding |
| 1           | coding    |
| 0.000402857 | noncoding |
| 0.000461091 | noncoding |
| 1           | coding    |
| 1           | coding    |
| 1           | coding    |
| 0.170857    | noncoding |
| 0.173252    | noncoding |
| 0.0184957   | noncoding |
| 0.0188565   | noncoding |
| 0.171236    | noncoding |
| 0.0200546   | noncoding |
| 0.418115    | noncoding |
| 0.0134421   | noncoding |
| 0.0323437   | noncoding |
| 0.0117073   | noncoding |
| 0.0695611   | noncoding |
| 0.688903    | coding    |
| 0.96039     | coding    |
| 0.502819    | coding    |
| 0.629102    | coding    |
| 0.121182    | noncoding |
| 0.0343959   | noncoding |
| 0.576855    | coding    |
| 0.997865    | coding    |
| 0.576855    | coding    |
| 0.115172    | noncoding |
| 0.0926347   | noncoding |
| 0.0672923   | noncoding |
| 0.0396806   | noncoding |
| 0.336317    | noncoding |
| 0.0516064   | noncoding |
| 0.0197784   | noncoding |
| 0.0530228   | noncoding |
| 0.12867     | noncoding |
| 0.0392631   | noncoding |
| 0.0958639   | noncoding |
| 0.235841    | noncoding |

|            |           |
|------------|-----------|
| 0.0664591  | noncoding |
| 0.111223   | noncoding |
| 0.0976918  | noncoding |
| 0.0245746  | noncoding |
| 0.0245746  | noncoding |
| 0.00879805 | noncoding |
| 0.130566   | noncoding |
| 0.0569996  | noncoding |
| 0.883942   | coding    |
| 0.911041   | coding    |
| 0.952409   | coding    |
| 0.989239   | coding    |
| 0.960324   | coding    |
| 0.960324   | coding    |
| 0.401518   | noncoding |
| 0.0285732  | noncoding |
| 0.039451   | noncoding |
| 0.0617513  | noncoding |
| 0.0791762  | noncoding |
| 0.0343066  | noncoding |
| 0.03273    | noncoding |
| 0.0922626  | noncoding |
| 0.998685   | coding    |
| 0.919592   | coding    |
| 0.997929   | coding    |
| 0.909819   | coding    |
| 0.507866   | coding    |
| 0.0234751  | noncoding |
| 0.183684   | noncoding |
| 0.176876   | noncoding |
| 0.079193   | noncoding |
| 0.382537   | noncoding |
| 0.119138   | noncoding |
| 0.379098   | noncoding |
| 0.0194879  | noncoding |
| 0.136234   | noncoding |
| 0.0968591  | noncoding |
| 0.0174739  | noncoding |
| 0.17494    | noncoding |
| 0.317511   | noncoding |
| 0.107279   | noncoding |
| 0.269733   | noncoding |
| 0.110283   | noncoding |
| 0.110283   | noncoding |
| 0.112146   | noncoding |
| 0.110343   | noncoding |
| 0.0967864  | noncoding |
| 0.0669604  | noncoding |
| 0.17471    | noncoding |
| 0.17471    | noncoding |
| 0.0815639  | noncoding |
| 0.0665646  | noncoding |
| 0.175355   | noncoding |
| 0.472838   | noncoding |

|             |           |
|-------------|-----------|
| 0.0278019   | noncoding |
| 0.0323972   | noncoding |
| 0.0323972   | noncoding |
| 0.0350672   | noncoding |
| 0.241849    | noncoding |
| 0.358364    | noncoding |
| 0.24931     | noncoding |
| 0.0410907   | noncoding |
| 0.0509154   | noncoding |
| 0.0238009   | noncoding |
| 0.131848    | noncoding |
| 0.104617    | noncoding |
| 0.0154847   | noncoding |
| 0.0325011   | noncoding |
| 0.152124    | noncoding |
| 0.0378384   | noncoding |
| 0.0177567   | noncoding |
| 0.0274777   | noncoding |
| 0.221654    | noncoding |
| 0.999998    | coding    |
| 0.192094    | noncoding |
| 0.0256445   | noncoding |
| 0.135862    | noncoding |
| 0.132093    | noncoding |
| 0.1819      | noncoding |
| 0.96935     | coding    |
| 0.161837    | noncoding |
| 0.958201    | coding    |
| 0.277706    | noncoding |
| 0.028876    | noncoding |
| 0.0243863   | noncoding |
| 0.0203453   | noncoding |
| 0.999336    | coding    |
| 0.0663277   | noncoding |
| 0.166803    | noncoding |
| 0.00110406  | noncoding |
| 0.000397128 | noncoding |
| 0.00073563  | noncoding |
| 0.00073563  | noncoding |
| 0.000553359 | noncoding |
| 0.00267832  | noncoding |
| 0.015648    | noncoding |
| 0.0012749   | noncoding |
| 0.0126291   | noncoding |
| 0.00135738  | noncoding |
| 0.999122    | coding    |
| 0.964673    | coding    |
| 0.0320068   | noncoding |
| 0.0227355   | noncoding |
| 1           | coding    |
| 0.0206866   | noncoding |
| 0.0138272   | noncoding |
| 0.583338    | coding    |
| 0.150198    | noncoding |

|            |           |
|------------|-----------|
| 0.126117   | noncoding |
| 0.126117   | noncoding |
| 0.0852824  | noncoding |
| 0.0971174  | noncoding |
| 0.0694245  | noncoding |
| 0.150198   | noncoding |
| 0.149121   | noncoding |
| 0.146247   | noncoding |
| 0.146247   | noncoding |
| 0.115524   | noncoding |
| 0.154206   | noncoding |
| 0.126176   | noncoding |
| 0.140509   | noncoding |
| 0.140509   | noncoding |
| 0.140509   | noncoding |
| 0.0463722  | noncoding |
| 0.163979   | noncoding |
| 0.999997   | coding    |
| 0.101297   | noncoding |
| 0.0220788  | noncoding |
| 0.104941   | noncoding |
| 0.428751   | noncoding |
| 0.0487107  | noncoding |
| 0.114518   | noncoding |
| 0.081286   | noncoding |
| 0.0610134  | noncoding |
| 0.056669   | noncoding |
| 0.087425   | noncoding |
| 0.868766   | coding    |
| 0.971459   | coding    |
| 0.0845443  | noncoding |
| 0.779603   | coding    |
| 0.829507   | coding    |
| 0.981107   | coding    |
| 0.0728061  | noncoding |
| 0.923835   | coding    |
| 0.890847   | coding    |
| 0.047489   | noncoding |
| 0.0799962  | noncoding |
| 0.0263568  | noncoding |
| 0.0784148  | noncoding |
| 1          | coding    |
| 1          | coding    |
| 0.150198   | noncoding |
| 0.213417   | noncoding |
| 0.20536    | noncoding |
| 1          | coding    |
| 1          | coding    |
| 1          | coding    |
| 0.178509   | noncoding |
| 0.00754453 | noncoding |
| 0.920908   | coding    |
| 0.922488   | coding    |
| 0.00477992 | noncoding |



|            |           |
|------------|-----------|
| 1          | coding    |
| 0.0901847  | noncoding |
| 0.0539573  | noncoding |
| 0.988319   | coding    |
| 0.979137   | coding    |
| 0.00889107 | noncoding |
| 0.0486195  | noncoding |
| 0.124697   | noncoding |
| 0.0520025  | noncoding |
| 0.183924   | noncoding |
| 0.136749   | noncoding |
| 0.0441802  | noncoding |
| 0.00196189 | noncoding |
| 0.0441802  | noncoding |
| 0.00184247 | noncoding |
| 0.00184802 | noncoding |
| 0.0285074  | noncoding |
| 0.00653133 | noncoding |
| 0.022752   | noncoding |
| 0.112749   | noncoding |
| 0.00239394 | noncoding |
| 0.157786   | noncoding |
| 0.165076   | noncoding |
| 0.0731713  | noncoding |
| 0.0731713  | noncoding |
| 0.207868   | noncoding |
| 0.207868   | noncoding |
| 0.214423   | noncoding |
| 0.207868   | noncoding |
| 0.207868   | noncoding |
| 0.207868   | noncoding |
| 0.222862   | noncoding |
| 0.207868   | noncoding |
| 0.212235   | noncoding |
| 0.405914   | noncoding |
| 0.916279   | coding    |
| 0.891035   | coding    |
| 0.241544   | noncoding |
| 0.0341228  | noncoding |
| 0.0271877  | noncoding |
| 0.0271588  | noncoding |
| 0.0483438  | noncoding |
| 0.799849   | coding    |
| 0.255756   | noncoding |
| 0.252038   | noncoding |
| 0.255756   | noncoding |
| 0.195085   | noncoding |
| 0.0822801  | noncoding |
| 0.272653   | noncoding |
| 0.255756   | noncoding |
| 0.017363   | noncoding |

|             |           |
|-------------|-----------|
| 0.069514    | noncoding |
| 0.0691951   | noncoding |
| 0.0184402   | noncoding |
| 0.0193157   | noncoding |
| 0.16018     | noncoding |
| 0.0551274   | noncoding |
| 0.000450717 | noncoding |
| 0.0673139   | noncoding |
| 0.014644    | noncoding |
| 0.0460821   | noncoding |
| 0.195295    | noncoding |
| 0.0728577   | noncoding |
| 0.0191612   | noncoding |
| 0.17696     | noncoding |
| 0.127496    | noncoding |
| 0.118436    | noncoding |
| 0.612041    | coding    |
| 0.155893    | noncoding |
| 0.381111    | noncoding |
| 0.231104    | noncoding |
| 0.999992    | coding    |
| 0.964121    | coding    |
| 0.614182    | coding    |
| 0.789612    | coding    |
| 0.202952    | noncoding |
| 0.678533    | coding    |
| 0.0594075   | noncoding |
| 0.413857    | noncoding |
| 0.797023    | coding    |
| 0.100336    | noncoding |
| 0.0560092   | noncoding |
| 0.00685208  | noncoding |
| 0.00322932  | noncoding |
| 0.0105425   | noncoding |
| 0.00802926  | noncoding |
| 0.00339685  | noncoding |
| 0.990298    | coding    |
| 0.0169005   | noncoding |
| 0.0538295   | noncoding |
| 0.00912665  | noncoding |
| 0.21378     | noncoding |
| 0.0607987   | noncoding |
| 0.251106    | noncoding |
| 0.16541     | noncoding |
| 0.16541     | noncoding |
| 0.0770353   | noncoding |
| 0.0770353   | noncoding |
| 0.169806    | noncoding |
| 0.110424    | noncoding |
| 0.0264339   | noncoding |
| 0.256961    | noncoding |
| 0.0317964   | noncoding |
| 0.0186651   | noncoding |
| 0.0181219   | noncoding |

|            |           |
|------------|-----------|
| 0.0535198  | noncoding |
| 0.0489481  | noncoding |
| 0.0461163  | noncoding |
| 0.0423633  | noncoding |
| 1          | coding    |
| 0.376027   | noncoding |
| 0.282697   | noncoding |
| 0.519052   | coding    |
| 0.282697   | noncoding |
| 0.378324   | noncoding |
| 1          | coding    |
| 0.19072    | noncoding |
| 0.987672   | coding    |
| 0.999995   | coding    |
| 0.0254357  | noncoding |
| 0.0330119  | noncoding |
| 0.0352139  | noncoding |
| 0.997437   | coding    |
| 0.413722   | noncoding |
| 1          | coding    |
| 0.780995   | coding    |
| 0.813771   | coding    |
| 0.18058    | noncoding |
| 0.0968213  | noncoding |
| 0.148992   | noncoding |
| 0.186869   | noncoding |
| 0.148992   | noncoding |
| 0.0118284  | noncoding |
| 0.0109427  | noncoding |
| 0.0131969  | noncoding |
| 0.100983   | noncoding |
| 0.321692   | noncoding |
| 0.134732   | noncoding |
| 0.134732   | noncoding |
| 0.120673   | noncoding |
| 0.0173127  | noncoding |
| 0.0970274  | noncoding |
| 0.0970274  | noncoding |
| 0.104657   | noncoding |
| 0.0970274  | noncoding |
| 0.104807   | noncoding |
| 0.00630033 | noncoding |
| 0.0054736  | noncoding |
| 0.00201876 | noncoding |
| 0.0908109  | noncoding |
| 0.0736648  | noncoding |
| 0.0399358  | noncoding |
| 0.0326794  | noncoding |
| 0.305475   | noncoding |
| 0.890015   | coding    |
| 0.995005   | coding    |
| 0.922028   | coding    |
| 0.102867   | noncoding |
| 0.0536577  | noncoding |

|             |           |
|-------------|-----------|
| 0.00597706  | noncoding |
| 0.00719013  | noncoding |
| 0.00719013  | noncoding |
| 0.0379917   | noncoding |
| 0.00759567  | noncoding |
| 0.419784    | noncoding |
| 0.0448864   | noncoding |
| 0.863688    | coding    |
| 0.935492    | coding    |
| 0.935492    | coding    |
| 0.0230418   | noncoding |
| 1           | coding    |
| 0.999999    | coding    |
| 1           | coding    |
| 1           | coding    |
| 1           | coding    |
| 0.000402811 | noncoding |
| 0.00614537  | noncoding |
| 0.027904    | noncoding |
| 0.000394785 | noncoding |
| 0.995762    | coding    |
| 0.995977    | coding    |
| 0.995977    | coding    |
| 0.0345781   | noncoding |
| 0.0790552   | noncoding |
| 0.0394863   | noncoding |
| 0.0219291   | noncoding |
| 0.0278584   | noncoding |
| 0.0690912   | noncoding |
| 0.381766    | noncoding |
| 0.119043    | noncoding |
| 0.0600822   | noncoding |
| 0.109042    | noncoding |
| 0.120903    | noncoding |
| 0.0625461   | noncoding |
| 0.0625461   | noncoding |
| 0.102985    | noncoding |
| 0.0265157   | noncoding |
| 0.0108638   | noncoding |
| 0.0442397   | noncoding |
| 0.0842058   | noncoding |
| 0.209379    | noncoding |
| 0.105946    | noncoding |
| 0.0530265   | noncoding |
| 0.0451978   | noncoding |
| 0.0496239   | noncoding |
| 0.000574412 | noncoding |
| 0.083482    | noncoding |
| 0.0215521   | noncoding |
| 0.0284717   | noncoding |
| 0.0202834   | noncoding |
| 0.131233    | noncoding |
| 0.00432254  | noncoding |
| 1           | coding    |

|             |           |
|-------------|-----------|
| 0.0780824   | noncoding |
| 0.0831694   | noncoding |
| 0.0831694   | noncoding |
| 0.159834    | noncoding |
| 0.0554308   | noncoding |
| 0.026831    | noncoding |
| 0.00983627  | noncoding |
| 0.0918095   | noncoding |
| 0.0892465   | noncoding |
| 0.107306    | noncoding |
| 0.196297    | noncoding |
| 0.196297    | noncoding |
| 0.325619    | noncoding |
| 0.147801    | noncoding |
| 0.0338737   | noncoding |
| 0.00690008  | noncoding |
| 0.196297    | noncoding |
| 0.0334922   | noncoding |
| 0.157331    | noncoding |
| 0.252785    | noncoding |
| 0.416647    | noncoding |
| 0.2534      | noncoding |
| 0.188195    | noncoding |
| 0.227868    | noncoding |
| 0.0252988   | noncoding |
| 0.103689    | noncoding |
| 0.0751527   | noncoding |
| 0.0698126   | noncoding |
| 0.140356    | noncoding |
| 0.0089567   | noncoding |
| 0.9976      | coding    |
| 0.242258    | noncoding |
| 0.995615    | coding    |
| 0.0983312   | noncoding |
| 0.9749      | coding    |
| 1           | coding    |
| 0.0032374   | noncoding |
| 0.00191637  | noncoding |
| 0.00104104  | noncoding |
| 0.000450717 | noncoding |
| 0.0200411   | noncoding |
| 0.453051    | noncoding |
| 0.996904    | coding    |
| 0.861124    | coding    |
| 0.165489    | noncoding |
| 0.120827    | noncoding |
| 0.171496    | noncoding |
| 0.340544    | noncoding |
| 0.453911    | noncoding |
| 0.0564795   | noncoding |
| 0.314005    | noncoding |
| 0.0651806   | noncoding |
| 0.541624    | coding    |
| 0.242684    | noncoding |

|             |           |
|-------------|-----------|
| 0.622609    | coding    |
| 0.55495     | coding    |
| 0.760951    | coding    |
| 0.618247    | coding    |
| 0.0613206   | noncoding |
| 0.778745    | coding    |
| 0.524628    | coding    |
| 0.675008    | coding    |
| 0.77478     | coding    |
| 0.385259    | noncoding |
| 0.0197683   | noncoding |
| 0.524628    | coding    |
| 0.00143366  | noncoding |
| 0.999708    | coding    |
| 0.600835    | coding    |
| 0.714352    | coding    |
| 0.581631    | coding    |
| 0.993129    | coding    |
| 0.786702    | coding    |
| 0.00102927  | noncoding |
| 0.10487     | noncoding |
| 0.0511661   | noncoding |
| 0.130988    | noncoding |
| 0.0637058   | noncoding |
| 0.0503929   | noncoding |
| 0.00465241  | noncoding |
| 0.0251101   | noncoding |
| 0.00183841  | noncoding |
| 0.999989    | coding    |
| 0.0212837   | noncoding |
| 0.0816635   | noncoding |
| 0.124391    | noncoding |
| 0.000534766 | noncoding |
| 0.158906    | noncoding |
| 0.18926     | noncoding |
| 0.18926     | noncoding |
| 0.179728    | noncoding |
| 0.171242    | noncoding |
| 0.197177    | noncoding |
| 0.279798    | noncoding |
| 0.279798    | noncoding |
| 0.279798    | noncoding |
| 0.00876626  | noncoding |
| 0.296608    | noncoding |
| 0.0110923   | noncoding |
| 0.279798    | noncoding |
| 0.00879981  | noncoding |
| 0.00923713  | noncoding |
| 0.0110923   | noncoding |
| 0.296608    | noncoding |
| 0.00867239  | noncoding |
| 0.00867214  | noncoding |
| 0.00895289  | noncoding |
| 0.0381461   | noncoding |

|           |           |
|-----------|-----------|
| 0.0199773 | noncoding |
| 0.019817  | noncoding |
| 0.0196661 | noncoding |
| 0.0108525 | noncoding |
| 0.0676191 | noncoding |
| 0.0687929 | noncoding |
| 0.116664  | noncoding |
| 0.139062  | noncoding |
| 0.0732742 | noncoding |
| 0.29543   | noncoding |
| 0.0554186 | noncoding |
| 0.231773  | noncoding |
| 0.0501026 | noncoding |
| 0.0395065 | noncoding |
| 0.178429  | noncoding |
| 0.178429  | noncoding |
| 0.0740637 | noncoding |
| 0.174161  | noncoding |
| 0.178429  | noncoding |
| 0.183905  | noncoding |
| 0.188787  | noncoding |
| 0.999896  | coding    |
| 0.999884  | coding    |
| 0.0335877 | noncoding |
| 0.447676  | noncoding |
| 0.189103  | noncoding |
| 0.883199  | coding    |
| 0.994395  | coding    |
| 1         | coding    |
| 1         | coding    |
| 0.997305  | coding    |
| 0.168313  | noncoding |
| 0.0517984 | noncoding |
| 0.0523451 | noncoding |
| 0.0654281 | noncoding |
| 0.0106681 | noncoding |
| 0.0312414 | noncoding |
| 0.0339179 | noncoding |
| 0.0731065 | noncoding |
| 0.696862  | coding    |
| 0.0107727 | noncoding |
| 0.465371  | noncoding |
| 0.0113259 | noncoding |
| 0.948057  | coding    |
| 0.939123  | coding    |
| 0.0801639 | noncoding |
| 0.086546  | noncoding |
| 0.0751375 | noncoding |
| 0.0713393 | noncoding |
| 0.999996  | coding    |
| 1         | coding    |

|            |           |
|------------|-----------|
| 1          | coding    |
| 1          | coding    |
| 0.13179    | noncoding |
| 0.107206   | noncoding |
| 0.056369   | noncoding |
| 0.0347182  | noncoding |
| 0.0164076  | noncoding |
| 0.789068   | coding    |
| 0.0134923  | noncoding |
| 0.0370436  | noncoding |
| 1          | coding    |
| 0.999993   | coding    |
| 0.681278   | coding    |
| 0.0222371  | noncoding |
| 0.174539   | noncoding |
| 0.0680724  | noncoding |
| 0.0354688  | noncoding |
| 0.999999   | coding    |
| 0.00485279 | noncoding |
| 0.0191537  | noncoding |
| 0.999972   | coding    |
| 0.0153236  | noncoding |
| 0.0270719  | noncoding |
| 0.0572872  | noncoding |
| 0.161779   | noncoding |
| 0.999868   | coding    |
| 0.289232   | noncoding |
| 0.0224116  | noncoding |
| 0.0464559  | noncoding |
| 0.223766   | noncoding |
| 1          | coding    |
| 0.00471072 | noncoding |
| 0.246527   | noncoding |
| 0.89476    | coding    |
| 0.76133    | coding    |
| 0.139355   | noncoding |
| 0.287942   | noncoding |
| 0.999999   | coding    |
| 1          | coding    |
| 0.999999   | coding    |
| 1          | coding    |
| 0.998401   | coding    |
| 1          | coding    |
| 1          | coding    |
| 0.224365   | noncoding |
| 1          | coding    |
| 0.242713   | noncoding |
| 0.290575   | noncoding |
| 0.35365    | noncoding |
| 0.299162   | noncoding |
| 0.334356   | noncoding |
| 0.334356   | noncoding |
| 0.363235   | noncoding |
| 0.363235   | noncoding |
