# Supplementary material for: Identification of Novel lncRNA and Differentially Expressed Genes (DEGs) of Testicular Tissues among Cattle, Yak, and Cattle-Yak Associated with Male Infertility
Source: MDPI journal article supplement (doi:10.3390/ani11082420), 2021-08-17
Supplement: s1 [file s1]

Table S9 The significantly enriched pathway description for the up-regulated lncRNA target genes of cattle-yak

| Pathway Id | Description | Annotated | Pvalue   | Qvalue   |
|------------|-------------|-----------|----------|----------|
| ko04210    | Apoptosis   | 225/8066  | 0.055015 | 0.049557 |

Table S10 The significantly enriched pathway description for the up-regulated lncRNA target genes of cattle

| Pathway Id | Description                    | Annotated | Pvalue   | Qvalue   |
|------------|--------------------------------|-----------|----------|----------|
| ko04512    | ECM-receptor interaction       | 146/8066  | 0.001906 | 0.00602  |
| ko04510    | Focal adhesion                 | 330/8066  | 0.009479 | 0.014967 |
| ko04151    | PI3K-Akt signaling pathway     | 493/8066  | 0.020597 | 0.021681 |
| ko04066    | HIF-1 signaling pathway        | 147/8066  | 0.070943 | 0.056007 |
| ko04120    | Ubiquitin mediated proteolysis | 290/8066  | 0.136266 | 0.071719 |

Table S11 The significantly enriched pathway description for the up-regulated mRNA target genes of cattle

| Pathway Id | Description                                 | Significant | Annotated | Pvalue   | Qvalue   |
|------------|---------------------------------------------|-------------|-----------|----------|----------|
| ko04120    | Ubiquitin mediated proteolysis              | 51/836      | 290/8066  | 9.57E-05 | 0.014715 |
| ko04340    | Hedgehog signaling pathway                  | 25/836      | 116/8066  | 0.000277 | 0.021253 |
| ko04141    | Protein processing in endoplasmic reticulum | 44/836      | 267/8066  | 0.001177 | 0.060271 |
| ko04114    | Oocyte meiosis                              | 30/836      | 171/8066  | 0.002635 | 0.087095 |
| ko00521    | Streptomycin biosynthesis                   | 5/836       | 11/8066   | 0.003201 | 0.087095 |
| ko00564    | Glycerophospholipid metabolism              | 23/836      | 124/8066  | 0.003918 | 0.087095 |
| ko04330    | Notch signaling pathway                     | 18/836      | 89/8066   | 0.003967 | 0.087095 |
| ko04341    | Hedgehog signaling pathway - Fly            | 11/836      | 49/8066   | 0.010149 | 0.176362 |
| ko00010    | Glycolysis / Gluconeogenesis                | 14/836      | 70/8066   | 0.011476 | 0.176362 |
| ko03460    | Fanconi anemia pathway                      | 14/836      | 70/8066   | 0.011476 | 0.176362 |
| ko00520    | Amino sugar and nucleotide sugar metabolism | 13/836      | 66/8066   | 0.016467 | 0.218762 |
| ko04110    | Cell cycle                                  | 30/836      | 196/8066  | 0.018421 | 0.218762 |
| ko03022    | Basal transcription factors                 | 12/836      | 60/8066   | 0.018505 | 0.218762 |
| ko00250    | Alanine, aspartate and glutamate metabolism | 10/836      | 48/8066   | 0.023128 | 0.253884 |

|         |                                 |        |          |          |          |
|---------|---------------------------------|--------|----------|----------|----------|
| ko00051 | Fructose and mannose metabolism | 8/836  | 36/8066  | 0.028159 | 0.279824 |
| ko04144 | Endocytosis                     | 57/836 | 430/8066 | 0.029132 | 0.279824 |
| ko00061 | Fatty acid biosynthesis         | 4/836  | 13/8066  | 0.038218 | 0.345498 |
| ko00562 | Inositol phosphate metabolism   | 14/836 | 84/8066  | 0.049012 | 0.409839 |

Table S12 The significantly enriched pathway description for the up-regulated mRNA target genes of yak

| Pathway Id | Description                                              | Annotated | Pvalue   | Qvalue   |
|------------|----------------------------------------------------------|-----------|----------|----------|
| ko04150    | mTOR signaling pathway                                   | 214/8066  | 0.011195 | 0.149375 |
| ko04550    | Signaling pathways regulating pluripotency of stem cells | 243/8066  | 0.015767 | 0.149375 |
| ko04064    | NF-kappa B signaling pathway                             | 138/8066  | 0.037175 | 0.192707 |
| ko04668    | TNF signaling pathway                                    | 145/8066  | 0.040683 | 0.192707 |
