# Supplementary material for: Identification of Novel lncRNA and Differentially Expressed Genes (DEGs) of Testicular Tissues among Cattle, Yak, and Cattle-Yak Associated with Male Infertility
Source: MDPI journal article supplement (doi:10.3390/ani11082420), 2021-08-17
Supplement: s1 [file s1]

Table S7 The significantly enriched GO description of BP, CC and MF  
for the upregulated mRNA target genes of cattle

| Ontology | Term                           | GO.ID      | Significant | Annotated | Qvalue   |
|----------|--------------------------------|------------|-------------|-----------|----------|
| BP       | cellular component             | GO:0071840 | 658         | 5228      | 1.14E-11 |
|          | organization or biogenesis     |            |             |           |          |
| BP       | reproductive process           | GO:0022414 | 187         | 1188      | 3.10E-08 |
| BP       | reproduction                   | GO:0000003 | 187         | 1190      | 3.40E-08 |
| BP       | metabolic process              | GO:0008152 | 1067        | 9982      | 0.002728 |
| BP       | cellular process               | GO:0009987 | 1505        | 14842     | 0.092403 |
| BP       | localization                   | GO:0051179 | 556         | 5065      | 0.094813 |
| BP       | multi-organism process         | GO:0051704 | 242         | 2045      | 0.095071 |
| BP       | establishment of localization  | GO:0051234 | 433         | 3965      | 0.357635 |
| CC       | organelle                      | GO:0043226 | 1476        | 12576     | 4.94E-28 |
| CC       | organelle part                 | GO:0044422 | 988         | 7853      | 1.39E-20 |
| CC       | membrane-enclosed lumen        | GO:0031974 | 471         | 3755      | 6.06E-07 |
| CC       | supramolecular fiber           | GO:0099512 | 135         | 841       | 8.82E-07 |
| CC       | cell part                      | GO:0044464 | 1728        | 16747     | 0.001307 |
| CC       | cell                           | GO:0005623 | 1728        | 16775     | 0.002938 |
| CC       | protein-containing complex     | GO:0032991 | 493         | 4316      | 0.008014 |
| CC       | synapse                        | GO:0045202 | 82          | 716       | 0.762281 |
| CC       | synapse part                   | GO:0044456 | 67          | 582       | 0.820478 |
| CC       | nucleoid                       | GO:0009295 | 7           | 43        | 0.856805 |
| MF       | catalytic activity             | GO:0003824 | 713         | 5764      | 7.85E-17 |
| MF       | binding                        | GO:0005488 | 1152        | 10991     | 2.38E-08 |
| MF       | translation regulator activity | GO:0045182 | 11          | 39        | 0.064563 |
