# Supplementary material for: Identification of Novel lncRNA and Differentially Expressed Genes (DEGs) of Testicular Tissues among Cattle, Yak, and Cattle-Yak Associated with Male Infertility
Source: MDPI journal article supplement (doi:10.3390/ani11082420), 2021-08-17
Supplement: s1 [file s1]

|               |       |           |         |
|---------------|-------|-----------|---------|
| MSTRG. 12. 1  | 2283  | coding    | PF00517 |
| MSTRG. 12. 2  | 676   | noncoding | —       |
| MSTRG. 12. 3  | 1262  | noncoding | —       |
| MSTRG. 32. 2  | 4334  | noncoding | —       |
| MSTRG. 33. 1  | 420   | noncoding | —       |
| MSTRG. 34. 2  | 1149  | noncoding | —       |
| MSTRG. 35. 1  | 867   | coding    | PF14981 |
| MSTRG. 39. 3  | 1065  | noncoding | —       |
| MSTRG. 39. 6  | 10401 | coding    | PF00474 |
| MSTRG. 59. 3  | 1764  | coding    | PF16617 |
| MSTRG. 60. 1  | 2252  | noncoding | —       |
| MSTRG. 61. 1  | 1132  | noncoding | —       |
| MSTRG. 60. 2  | 4486  | noncoding | —       |
| MSTRG. 63. 2  | 4052  | noncoding | —       |
| MSTRG. 63. 4  | 3991  | noncoding | —       |
| MSTRG. 63. 6  | 6056  | noncoding | —       |
| MSTRG. 63. 7  | 3748  | noncoding | —       |
| MSTRG. 63. 5  | 3494  | noncoding | —       |
| MSTRG. 63. 8  | 3902  | noncoding | —       |
| MSTRG. 63. 3  | 4087  | noncoding | —       |
| MSTRG. 65. 10 | 8160  | noncoding | —       |
| MSTRG. 65. 11 | 8199  | noncoding | —       |
| MSTRG. 65. 4  | 8008  | noncoding | —       |
| MSTRG. 65. 5  | 8193  | noncoding | —       |
| MSTRG. 65. 6  | 8029  | noncoding | —       |
| MSTRG. 65. 8  | 8140  | noncoding | —       |
| MSTRG. 65. 9  | 8190  | noncoding | —       |
| MSTRG. 65. 14 | 7836  | noncoding | —       |
| MSTRG. 65. 15 | 7806  | noncoding | —       |
| MSTRG. 65. 16 | 7815  | noncoding | —       |
| MSTRG. 66. 1  | 4138  | coding    | PF01071 |
| MSTRG. 66. 2  | 4105  | coding    | PF01071 |
| MSTRG. 66. 3  | 4040  | coding    | PF01071 |
| MSTRG. 66. 4  | 3995  | coding    | PF01071 |
| MSTRG. 68. 2  | 3679  | coding    | PF09350 |
| MSTRG. 42. 1  | 5454  | noncoding | —       |
| MSTRG. 56. 2  | 4773  | noncoding | —       |
| MSTRG. 56. 4  | 4711  | noncoding | —       |
| MSTRG. 56. 6  | 7508  | noncoding | —       |
| MSTRG. 56. 7  | 2812  | noncoding | —       |
| MSTRG. 56. 8  | 2870  | noncoding | —       |
| MSTRG. 52. 1  | 7093  | coding    | PF02383 |
| MSTRG. 52. 2  | 6984  | coding    | PF02383 |
| MSTRG. 53. 1  | 1555  | coding    | PF11069 |
| MSTRG. 53. 2  | 1632  | coding    | PF11069 |
| MSTRG. 70. 1  | 3716  | noncoding | —       |
| MSTRG. 73. 2  | 3795  | noncoding | —       |
| MSTRG. 78. 1  | 7956  | noncoding | —       |
| MSTRG. 79. 2  | 2529  | noncoding | —       |
| MSTRG. 78. 2  | 8273  | noncoding | —       |
| MSTRG. 80. 1  | 328   | noncoding | —       |
| MSTRG. 81. 1  | 1462  | coding    | PF00078 |
| MSTRG. 79. 3  | 9939  | noncoding | —       |
| MSTRG. 82. 1  | 446   | noncoding | —       |

|               |       |           |         |
|---------------|-------|-----------|---------|
| MSTRG. 79. 4  | 3123  | noncoding | –       |
| MSTRG. 79. 5  | 6284  | noncoding | –       |
| MSTRG. 79. 6  | 3198  | noncoding | –       |
| MSTRG. 83. 1  | 3477  | noncoding | –       |
| MSTRG. 79. 7  | 9751  | noncoding | –       |
| MSTRG. 85. 1  | 1564  | noncoding | –       |
| MSTRG. 86. 1  | 6606  | noncoding | –       |
| MSTRG. 96. 9  | 3025  | coding    | PF00443 |
| MSTRG. 96. 10 | 3187  | coding    | PF00443 |
| MSTRG. 96. 6  | 4207  | coding    | PF00443 |
| MSTRG. 96. 8  | 3423  | coding    | PF00443 |
| MSTRG. 96. 3  | 3545  | coding    | PF00443 |
| MSTRG. 97. 1  | 2424  | noncoding | –       |
| MSTRG. 97. 2  | 2332  | noncoding | –       |
| MSTRG. 91. 1  | 1940  | noncoding | –       |
| MSTRG. 103. 6 | 3212  | noncoding | –       |
| MSTRG. 103. 2 | 7991  | noncoding | –       |
| MSTRG. 103. 5 | 7127  | noncoding | –       |
| MSTRG. 103. 4 | 5797  | noncoding | –       |
| MSTRG. 104. 1 | 1278  | noncoding | –       |
| MSTRG. 104. 3 | 822   | noncoding | –       |
| MSTRG. 111. 1 | 462   | noncoding | –       |
| MSTRG. 117. 6 | 1795  | coding    | PF00178 |
| MSTRG. 118. 5 | 509   | coding    | PF05511 |
| MSTRG. 123. 1 | 386   | noncoding | –       |
| MSTRG. 127. 1 | 672   | noncoding | –       |
| MSTRG. 131. 1 | 226   | noncoding | –       |
| MSTRG. 132. 1 | 2022  | noncoding | –       |
| MSTRG. 134. 1 | 408   | noncoding | –       |
| MSTRG. 151. 1 | 2839  | noncoding | –       |
| MSTRG. 188. 1 | 18614 | coding    | PF00078 |
| MSTRG. 189. 1 | 3356  | coding    | PF02994 |
| MSTRG. 193. 1 | 669   | noncoding | –       |
| MSTRG. 196. 1 | 1087  | coding    | PF00078 |
| MSTRG. 223. 1 | 670   | noncoding | –       |
| MSTRG. 241. 1 | 1743  | noncoding | –       |
| MSTRG. 158. 1 | 9706  | noncoding | –       |
| MSTRG. 158. 6 | 3741  | noncoding | –       |
| MSTRG. 158. 5 | 3712  | noncoding | –       |
| MSTRG. 158. 4 | 3958  | noncoding | –       |
| MSTRG. 158. 8 | 3405  | noncoding | –       |
| MSTRG. 158. 7 | 3554  | noncoding | –       |
| MSTRG. 158. 9 | 4805  | coding    | PF00443 |
| MSTRG. 160. 1 | 1441  | noncoding | –       |
| MSTRG. 160. 3 | 7489  | coding    | PF15690 |
| MSTRG. 160. 4 | 7684  | coding    | PF15690 |
| MSTRG. 160. 5 | 6419  | coding    | PF15690 |
| MSTRG. 160. 6 | 7735  | coding    | PF15690 |
| MSTRG. 161. 1 | 806   | noncoding | –       |
| MSTRG. 162. 1 | 11244 | noncoding | –       |
| MSTRG. 162. 2 | 4935  | noncoding | –       |
| MSTRG. 160. 7 | 1232  | noncoding | –       |
| MSTRG. 163. 1 | 2378  | coding    | PF00012 |
| MSTRG. 163. 3 | 4264  | coding    | PF00012 |

|                |       |           |         |
|----------------|-------|-----------|---------|
| MSTRG. 164. 1  | 948   | noncoding | —       |
| MSTRG. 166. 2  | 1809  | coding    | PF00076 |
| MSTRG. 168. 2  | 518   | noncoding | —       |
| MSTRG. 169. 1  | 333   | noncoding | —       |
| MSTRG. 175. 3  | 5067  | coding    | PF07679 |
| MSTRG. 175. 4  | 3094  | noncoding | —       |
| MSTRG. 175. 5  | 3963  | coding    | PF07679 |
| MSTRG. 175. 6  | 3343  | coding    | PF07679 |
| MSTRG. 265. 8  | 4630  | noncoding | —       |
| MSTRG. 265. 9  | 16818 | coding    | PF00078 |
| MSTRG. 266. 1  | 1593  | noncoding | —       |
| MSTRG. 267. 1  | 7874  | noncoding | —       |
| MSTRG. 268. 1  | 5779  | noncoding | —       |
| MSTRG. 269. 1  | 1804  | noncoding | —       |
| MSTRG. 268. 2  | 2022  | noncoding | —       |
| MSTRG. 270. 1  | 5102  | noncoding | —       |
| MSTRG. 271. 1  | 4432  | noncoding | —       |
| MSTRG. 272. 1  | 10685 | noncoding | —       |
| MSTRG. 273. 1  | 3854  | noncoding | —       |
| MSTRG. 274. 1  | 4757  | noncoding | —       |
| MSTRG. 275. 1  | 2568  | noncoding | —       |
| MSTRG. 276. 1  | 2355  | noncoding | —       |
| MSTRG. 277. 1  | 6352  | noncoding | —       |
| MSTRG. 277. 2  | 4614  | noncoding | —       |
| MSTRG. 278. 1  | 15264 | noncoding | —       |
| MSTRG. 265. 10 | 5365  | noncoding | —       |
| MSTRG. 265. 11 | 15534 | noncoding | —       |
| MSTRG. 279. 1  | 13704 | noncoding | —       |
| MSTRG. 265. 12 | 10450 | noncoding | —       |
| MSTRG. 280. 1  | 5462  | noncoding | —       |
| MSTRG. 281. 1  | 14521 | noncoding | —       |
| MSTRG. 282. 1  | 7437  | noncoding | —       |
| MSTRG. 283. 1  | 5415  | noncoding | —       |
| MSTRG. 284. 1  | 6419  | noncoding | —       |
| MSTRG. 284. 2  | 4997  | noncoding | —       |
| MSTRG. 265. 14 | 31168 | coding    | PF00078 |
| MSTRG. 285. 1  | 6274  | noncoding | —       |
| MSTRG. 250. 1  | 3949  | noncoding | —       |
| MSTRG. 255. 1  | 3932  | noncoding | —       |
| MSTRG. 258. 1  | 7201  | noncoding | —       |
| MSTRG. 261. 1  | 1785  | noncoding | —       |
| MSTRG. 262. 1  | 4299  | noncoding | —       |
| MSTRG. 263. 1  | 2450  | noncoding | —       |
| MSTRG. 297. 1  | 987   | noncoding | —       |
| MSTRG. 307. 1  | 11283 | noncoding | —       |
| MSTRG. 308. 1  | 3366  | noncoding | —       |
| MSTRG. 312. 1  | 900   | noncoding | —       |
| MSTRG. 314. 1  | 2186  | noncoding | —       |
| MSTRG. 314. 3  | 5604  | noncoding | —       |
| MSTRG. 325. 3  | 2349  | coding    | PF01404 |
| MSTRG. 325. 4  | 2546  | coding    | PF01404 |
| MSTRG. 326. 1  | 4429  | noncoding | —       |
| MSTRG. 327. 1  | 5165  | noncoding | —       |
| MSTRG. 324. 1  | 377   | noncoding | —       |

|               |       |           |         |
|---------------|-------|-----------|---------|
| MSTRG. 328. 1 | 1297  | noncoding | –       |
| MSTRG. 328. 2 | 4067  | noncoding | –       |
| MSTRG. 332. 1 | 5526  | noncoding | –       |
| MSTRG. 348. 1 | 277   | noncoding | –       |
| MSTRG. 351. 1 | 2447  | coding    | PF00025 |
| MSTRG. 352. 1 | 6301  | noncoding | –       |
| MSTRG. 353. 1 | 1004  | noncoding | –       |
| MSTRG. 356. 1 | 1752  | noncoding | –       |
| MSTRG. 361. 1 | 224   | noncoding | –       |
| MSTRG. 375. 2 | 11388 | coding    | PF00025 |
| MSTRG. 375. 5 | 10605 | coding    | PF00030 |
| MSTRG. 377. 1 | 1084  | noncoding | –       |
| MSTRG. 377. 2 | 1407  | noncoding | –       |
| MSTRG. 379. 3 | 1947  | coding    | PF08007 |
| MSTRG. 379. 5 | 1795  | coding    | PF08007 |
| MSTRG. 369. 1 | 921   | noncoding | –       |
| MSTRG. 370. 1 | 213   | noncoding | –       |
| MSTRG. 371. 1 | 1977  | noncoding | –       |
| MSTRG. 381. 3 | 5793  | coding    | PF00754 |
| MSTRG. 396. 1 | 7683  | noncoding | –       |
| MSTRG. 397. 1 | 11618 | noncoding | –       |
| MSTRG. 396. 3 | 4020  | noncoding | –       |
| MSTRG. 398. 1 | 7300  | noncoding | –       |
| MSTRG. 399. 1 | 4279  | noncoding | –       |
| MSTRG. 400. 1 | 5086  | noncoding | –       |
| MSTRG. 401. 1 | 3548  | noncoding | –       |
| MSTRG. 404. 3 | 3800  | noncoding | –       |
| MSTRG. 404. 4 | 2391  | noncoding | –       |
| MSTRG. 404. 6 | 3203  | noncoding | –       |
| MSTRG. 404. 5 | 3481  | noncoding | –       |
| MSTRG. 404. 7 | 3160  | noncoding | –       |
| MSTRG. 404. 8 | 3547  | noncoding | –       |
| MSTRG. 391. 3 | 2350  | noncoding | –       |
| MSTRG. 392. 2 | 2025  | coding    | PF15419 |
| MSTRG. 393. 2 | 822   | noncoding | –       |
| MSTRG. 405. 1 | 1840  | noncoding | –       |
| MSTRG. 405. 7 | 2317  | noncoding | –       |
| MSTRG. 405. 3 | 1940  | noncoding | –       |
| MSTRG. 405. 4 | 2331  | noncoding | –       |
| MSTRG. 405. 5 | 1937  | noncoding | –       |
| MSTRG. 405. 6 | 1949  | noncoding | –       |
| MSTRG. 405. 8 | 1920  | noncoding | –       |
| MSTRG. 405. 9 | 1719  | noncoding | –       |
| MSTRG. 407. 1 | 1465  | noncoding | –       |
| MSTRG. 416. 1 | 916   | noncoding | –       |
| MSTRG. 423. 2 | 2210  | coding    | PF15473 |
| MSTRG. 424. 1 | 7023  | coding    | PF15131 |
| MSTRG. 424. 2 | 6720  | coding    | PF15131 |
| MSTRG. 424. 3 | 6242  | noncoding | –       |
| MSTRG. 426. 1 | 5075  | noncoding | –       |
| MSTRG. 427. 1 | 5367  | coding    | PF15131 |
| MSTRG. 429. 1 | 3857  | coding    | PF14580 |
| MSTRG. 429. 2 | 3432  | coding    | PF14580 |
| MSTRG. 449. 1 | 301   | noncoding | –       |

|                |       |           |         |
|----------------|-------|-----------|---------|
| MSTRG. 451. 1  | 16139 | noncoding | -       |
| MSTRG. 451. 2  | 4912  | noncoding | -       |
| MSTRG. 452. 1  | 1063  | noncoding | -       |
| MSTRG. 457. 1  | 13686 | noncoding | -       |
| MSTRG. 435. 3  | 1434  | noncoding | -       |
| MSTRG. 439. 1  | 1614  | noncoding | -       |
| MSTRG. 438. 2  | 3811  | coding    | PF02761 |
| MSTRG. 440. 1  | 8222  | noncoding | -       |
| MSTRG. 441. 1  | 5551  | noncoding | -       |
| MSTRG. 467. 6  | 8476  | coding    | PF00078 |
| MSTRG. 467. 7  | 795   | noncoding | -       |
| MSTRG. 468. 1  | 28602 | noncoding | -       |
| MSTRG. 468. 2  | 21333 | noncoding | -       |
| MSTRG. 468. 3  | 4826  | noncoding | -       |
| MSTRG. 468. 4  | 2649  | noncoding | -       |
| MSTRG. 468. 5  | 9859  | noncoding | -       |
| MSTRG. 470. 1  | 1555  | noncoding | -       |
| MSTRG. 467. 10 | 8230  | coding    | PF09667 |
| MSTRG. 467. 9  | 8202  | coding    | PF09667 |
| MSTRG. 467. 11 | 8946  | coding    | PF09667 |
| MSTRG. 471. 1  | 2752  | noncoding | -       |
| MSTRG. 472. 1  | 6260  | noncoding | -       |
| MSTRG. 463. 1  | 4928  | coding    | PF08204 |
| MSTRG. 463. 4  | 2748  | coding    | PF08204 |
| MSTRG. 464. 1  | 2608  | noncoding | -       |
| MSTRG. 474. 1  | 1811  | noncoding | -       |
| MSTRG. 479. 1  | 1304  | coding    | PF01576 |
| MSTRG. 481. 2  | 533   | coding    | PF00063 |
| MSTRG. 481. 1  | 513   | coding    | PF00063 |
| MSTRG. 487. 2  | 3659  | noncoding | -       |
| MSTRG. 488. 3  | 2220  | noncoding | -       |
| MSTRG. 484. 1  | 310   | noncoding | -       |
| MSTRG. 493. 1  | 884   | noncoding | -       |
| MSTRG. 497. 1  | 311   | noncoding | -       |
| MSTRG. 506. 1  | 872   | noncoding | -       |
| MSTRG. 508. 3  | 3919  | coding    | PF08205 |
| MSTRG. 508. 4  | 4202  | coding    | PF08205 |
| MSTRG. 508. 2  | 2701  | coding    | PF08205 |
| MSTRG. 508. 5  | 10720 | coding    | PF08205 |
| MSTRG. 509. 1  | 1125  | noncoding | -       |
| MSTRG. 512. 2  | 761   | noncoding | -       |
| MSTRG. 513. 4  | 6094  | noncoding | -       |
| MSTRG. 514. 4  | 3432  | noncoding | -       |
| MSTRG. 514. 3  | 3938  | noncoding | -       |
| MSTRG. 514. 5  | 3707  | noncoding | -       |
| MSTRG. 515. 1  | 4307  | noncoding | -       |
| MSTRG. 521. 1  | 2518  | noncoding | -       |
| MSTRG. 521. 3  | 2203  | noncoding | -       |
| MSTRG. 521. 4  | 2292  | coding    | PF04142 |
| MSTRG. 521. 6  | 1818  | coding    | PF04142 |
| MSTRG. 521. 7  | 2428  | noncoding | -       |
| MSTRG. 526. 3  | 2484  | noncoding | -       |
| MSTRG. 526. 1  | 5409  | noncoding | -       |
| MSTRG. 526. 2  | 10942 | noncoding | -       |

|                |       |           |         |
|----------------|-------|-----------|---------|
| MSTRG. 527. 2  | 2549  | noncoding | –       |
| MSTRG. 533. 2  | 620   | noncoding | –       |
| MSTRG. 533. 3  | 2975  | coding    | PF15678 |
| MSTRG. 535. 1  | 1805  | coding    | PF00583 |
| MSTRG. 535. 4  | 2959  | noncoding | –       |
| MSTRG. 538. 1  | 4464  | coding    | PF00006 |
| MSTRG. 538. 2  | 4857  | coding    | PF00006 |
| MSTRG. 538. 3  | 4420  | coding    | PF00006 |
| MSTRG. 538. 4  | 4694  | coding    | PF00006 |
| MSTRG. 539. 1  | 2739  | noncoding | –       |
| MSTRG. 570. 1  | 4124  | coding    | PF00651 |
| MSTRG. 570. 15 | 28296 | coding    | PF00651 |
| MSTRG. 570. 14 | 10728 | coding    | PF00651 |
| MSTRG. 570. 16 | 24886 | coding    | PF00651 |
| MSTRG. 570. 18 | 11197 | coding    | PF00651 |
| MSTRG. 570. 17 | 11343 | coding    | PF00651 |
| MSTRG. 570. 19 | 11680 | coding    | PF00651 |
| MSTRG. 570. 20 | 12149 | coding    | PF00651 |
| MSTRG. 570. 22 | 28372 | coding    | PF00651 |
| MSTRG. 570. 21 | 11567 | coding    | PF00651 |
| MSTRG. 570. 23 | 11470 | coding    | PF00651 |
| MSTRG. 571. 1  | 1869  | noncoding | –       |
| MSTRG. 572. 1  | 1690  | noncoding | –       |
| MSTRG. 570. 24 | 12937 | noncoding | –       |
| MSTRG. 573. 1  | 884   | noncoding | –       |
| MSTRG. 574. 1  | 1848  | noncoding | –       |
| MSTRG. 575. 1  | 265   | noncoding | –       |
| MSTRG. 576. 1  | 1934  | noncoding | –       |
| MSTRG. 577. 1  | 3572  | noncoding | –       |
| MSTRG. 578. 1  | 12679 | coding    | PF00078 |
| MSTRG. 570. 25 | 2096  | noncoding | –       |
| MSTRG. 579. 1  | 6774  | noncoding | –       |
| MSTRG. 580. 1  | 3642  | noncoding | –       |
| MSTRG. 581. 1  | 9689  | noncoding | –       |
| MSTRG. 582. 1  | 7226  | noncoding | –       |
| MSTRG. 583. 1  | 792   | noncoding | –       |
| MSTRG. 584. 1  | 1597  | noncoding | –       |
| MSTRG. 546. 1  | 1478  | coding    | PF06614 |
| MSTRG. 546. 2  | 1548  | coding    | PF06614 |
| MSTRG. 547. 1  | 1414  | coding    | PF07679 |
| MSTRG. 560. 4  | 3605  | noncoding | –       |
| MSTRG. 560. 1  | 3265  | coding    | PF07686 |
| MSTRG. 560. 6  | 1888  | noncoding | –       |
| MSTRG. 561. 1  | 2009  | noncoding | –       |
| MSTRG. 562. 1  | 2221  | noncoding | –       |
| MSTRG. 564. 1  | 827   | noncoding | –       |
| MSTRG. 601. 2  | 1650  | coding    | PF10271 |
| MSTRG. 615. 6  | 1420  | coding    | PF00069 |
| MSTRG. 615. 4  | 1543  | coding    | PF00069 |
| MSTRG. 615. 5  | 1544  | coding    | PF00069 |
| MSTRG. 616. 1  | 1868  | noncoding | –       |
| MSTRG. 617. 1  | 2030  | noncoding | –       |
| MSTRG. 622. 2  | 6793  | noncoding | –       |
| MSTRG. 622. 3  | 5259  | noncoding | –       |

|                |       |           |         |
|----------------|-------|-----------|---------|
| MSTRG. 622. 4  | 6825  | noncoding | -       |
| MSTRG. 623. 1  | 1389  | noncoding | -       |
| MSTRG. 624. 2  | 3651  | coding    | PF07648 |
| MSTRG. 624. 3  | 3503  | coding    | PF07648 |
| MSTRG. 625. 1  | 1091  | noncoding | -       |
| MSTRG. 627. 1  | 2349  | noncoding | -       |
| MSTRG. 628. 1  | 2622  | coding    | PF11521 |
| MSTRG. 628. 2  | 2721  | coding    | PF11521 |
| MSTRG. 628. 3  | 1946  | coding    | PF11521 |
| MSTRG. 628. 6  | 3441  | coding    | PF11521 |
| MSTRG. 628. 5  | 1994  | coding    | PF11521 |
| MSTRG. 639. 1  | 4455  | noncoding | -       |
| MSTRG. 639. 2  | 12639 | noncoding | -       |
| MSTRG. 645. 1  | 2423  | noncoding | -       |
| MSTRG. 646. 1  | 9004  | coding    | PF00476 |
| MSTRG. 646. 3  | 3301  | noncoding | -       |
| MSTRG. 646. 4  | 4504  | noncoding | -       |
| MSTRG. 633. 4  | 2317  | noncoding | -       |
| MSTRG. 633. 5  | 2214  | noncoding | -       |
| MSTRG. 633. 6  | 2171  | noncoding | -       |
| MSTRG. 633. 7  | 2186  | noncoding | -       |
| MSTRG. 635. 1  | 810   | noncoding | -       |
| MSTRG. 635. 2  | 475   | noncoding | -       |
| MSTRG. 650. 1  | 8225  | coding    | PF16186 |
| MSTRG. 665. 2  | 1579  | coding    | PF04387 |
| MSTRG. 665. 3  | 1257  | noncoding | -       |
| MSTRG. 671. 6  | 5177  | coding    | PF00069 |
| MSTRG. 671. 9  | 2301  | coding    | PF00069 |
| MSTRG. 671. 10 | 3950  | coding    | PF00069 |
| MSTRG. 671. 12 | 3950  | coding    | PF00069 |
| MSTRG. 671. 15 | 3914  | coding    | PF00069 |
| MSTRG. 671. 16 | 3914  | coding    | PF00069 |
| MSTRG. 671. 18 | 1357  | coding    | PF07679 |
| MSTRG. 672. 1  | 6181  | coding    | PF00078 |
| MSTRG. 667. 3  | 2241  | coding    | PF15254 |
| MSTRG. 691. 1  | 13843 | coding    | PF16609 |
| MSTRG. 691. 2  | 13870 | coding    | PF16609 |
| MSTRG. 691. 5  | 11375 | coding    | PF00621 |
| MSTRG. 691. 6  | 12421 | coding    | PF00621 |
| MSTRG. 691. 3  | 14952 | coding    | PF16609 |
| MSTRG. 691. 7  | 341   | noncoding | -       |
| MSTRG. 691. 8  | 9053  | coding    | PF16609 |
| MSTRG. 691. 9  | 23036 | coding    | PF00078 |
| MSTRG. 691. 10 | 9449  | coding    | PF16609 |
| MSTRG. 691. 11 | 13172 | coding    | PF16609 |
| MSTRG. 691. 12 | 2639  | noncoding | -       |
| MSTRG. 693. 1  | 10826 | noncoding | -       |
| MSTRG. 694. 1  | 2144  | noncoding | -       |
| MSTRG. 691. 13 | 9745  | coding    | PF16609 |
| MSTRG. 691. 14 | 15325 | coding    | PF16609 |
| MSTRG. 691. 15 | 9401  | coding    | PF16609 |
| MSTRG. 691. 17 | 30379 | coding    | PF16609 |
| MSTRG. 691. 18 | 15278 | coding    | PF00078 |
| MSTRG. 695. 1  | 5304  | noncoding | -       |

|                |       |           |         |
|----------------|-------|-----------|---------|
| MSTRG. 691. 21 | 14645 | noncoding | -       |
| MSTRG. 691. 20 | 5117  | coding    | PF16609 |
| MSTRG. 691. 22 | 4118  | coding    | PF16609 |
| MSTRG. 696. 1  | 6548  | noncoding | -       |
| MSTRG. 675. 2  | 10001 | noncoding | -       |
| MSTRG. 681. 5  | 2790  | noncoding | -       |
| MSTRG. 681. 4  | 3288  | noncoding | -       |
| MSTRG. 684. 1  | 1615  | noncoding | -       |
| MSTRG. 684. 4  | 1406  | noncoding | -       |
| MSTRG. 699. 1  | 2576  | noncoding | -       |
| MSTRG. 699. 3  | 4028  | noncoding | -       |
| MSTRG. 699. 4  | 2441  | noncoding | -       |
| MSTRG. 702. 1  | 3322  | coding    | PF01247 |
| MSTRG. 704. 4  | 4609  | noncoding | -       |
| MSTRG. 704. 6  | 2959  | noncoding | -       |
| MSTRG. 704. 7  | 13606 | noncoding | -       |
| MSTRG. 685. 2  | 6877  | coding    | PF07078 |
| MSTRG. 685. 1  | 5119  | coding    | PF07078 |
| MSTRG. 685. 3  | 4736  | coding    | PF07078 |
| MSTRG. 687. 5  | 5563  | coding    | PF13901 |
| MSTRG. 687. 6  | 1552  | noncoding | -       |
| MSTRG. 705. 6  | 7076  | noncoding | -       |
| MSTRG. 705. 3  | 3897  | coding    | PF07714 |
| MSTRG. 705. 4  | 10002 | coding    | PF07714 |
| MSTRG. 705. 5  | 5311  | coding    | PF07714 |
| MSTRG. 705. 1  | 5266  | coding    | PF07714 |
| MSTRG. 705. 7  | 5212  | coding    | PF07714 |
| MSTRG. 705. 8  | 5104  | coding    | PF07714 |
| MSTRG. 706. 3  | 5291  | coding    | PF04389 |
| MSTRG. 706. 4  | 5449  | noncoding | -       |
| MSTRG. 707. 1  | 653   | noncoding | -       |
| MSTRG. 708. 1  | 5127  | coding    | PF01467 |
| MSTRG. 708. 5  | 3198  | coding    | PF01467 |
| MSTRG. 708. 4  | 1556  | coding    | PF01467 |
| MSTRG. 708. 3  | 1320  | coding    | PF01467 |
| MSTRG. 710. 3  | 6744  | coding    | PF00789 |
| MSTRG. 713. 3  | 1801  | noncoding | -       |
| MSTRG. 714. 1  | 1915  | noncoding | -       |
| MSTRG. 714. 2  | 2194  | noncoding | -       |
| MSTRG. 715. 1  | 3601  | noncoding | -       |
| MSTRG. 717. 1  | 516   | noncoding | -       |
| MSTRG. 718. 1  | 1535  | noncoding | -       |
| MSTRG. 730. 7  | 2727  | coding    | PF10608 |
| MSTRG. 731. 1  | 719   | noncoding | -       |
| MSTRG. 732. 1  | 6110  | noncoding | -       |
| MSTRG. 733. 1  | 1395  | noncoding | -       |
| MSTRG. 727. 2  | 1672  | coding    | PF00106 |
| MSTRG. 727. 3  | 1640  | coding    | PF00106 |
| MSTRG. 727. 4  | 1826  | coding    | PF00106 |
| MSTRG. 728. 1  | 2248  | noncoding | -       |
| MSTRG. 728. 2  | 1835  | noncoding | -       |
| MSTRG. 728. 3  | 1645  | noncoding | -       |
| MSTRG. 735. 1  | 1746  | noncoding | -       |
| MSTRG. 739. 1  | 4526  | noncoding | -       |



|               |       |           |         |
|---------------|-------|-----------|---------|
| MSTRG. 740. 1 | 3842  | noncoding | -       |
| MSTRG. 741. 1 | 3971  | noncoding | -       |
| MSTRG. 743. 2 | 1318  | noncoding | -       |
| MSTRG. 752. 5 | 972   | coding    | PF04970 |
| MSTRG. 752. 6 | 918   | coding    | PF04970 |
| MSTRG. 755. 1 | 518   | noncoding | -       |
| MSTRG. 756. 1 | 3083  | noncoding | -       |
| MSTRG. 758. 1 | 5125  | noncoding | -       |
| MSTRG. 774. 1 | 7359  | noncoding | -       |
| MSTRG. 776. 1 | 6943  | noncoding | -       |
| MSTRG. 777. 1 | 2218  | noncoding | -       |
| MSTRG. 770. 1 | 552   | coding    | PF00870 |
| MSTRG. 771. 1 | 437   | noncoding | -       |
| MSTRG. 771. 2 | 228   | noncoding | -       |
| MSTRG. 778. 1 | 363   | noncoding | -       |
| MSTRG. 782. 2 | 18584 | coding    | PF00412 |
| MSTRG. 782. 3 | 17253 | coding    | PF00412 |
| MSTRG. 782. 4 | 2281  | coding    | PF00412 |
| MSTRG. 782. 5 | 3474  | coding    | PF00412 |
| MSTRG. 784. 1 | 1690  | coding    | PF13695 |
| MSTRG. 784. 2 | 2254  | coding    | PF13695 |
| MSTRG. 786. 1 | 2289  | coding    | PF00089 |
| MSTRG. 794. 2 | 535   | noncoding | -       |
| MSTRG. 803. 3 | 1988  | coding    | PF00226 |
| MSTRG. 804. 1 | 1257  | coding    | PF00226 |
| MSTRG. 804. 2 | 404   | coding    | PF00226 |
| MSTRG. 805. 1 | 2354  | noncoding | -       |
| MSTRG. 806. 1 | 3284  | coding    | PF07986 |
| MSTRG. 806. 4 | 2048  | coding    | PF00030 |
| MSTRG. 801. 1 | 800   | noncoding | -       |
| MSTRG. 813. 2 | 6871  | coding    | PF02902 |
| MSTRG. 817. 1 | 5449  | noncoding | -       |
| MSTRG. 831. 2 | 5847  | coding    | PF12816 |
| MSTRG. 831. 4 | 3823  | coding    | PF12816 |
| MSTRG. 833. 1 | 236   | noncoding | -       |
| MSTRG. 835. 1 | 4143  | coding    | PF15010 |
| MSTRG. 836. 2 | 3156  | coding    | PF00654 |
| MSTRG. 837. 4 | 5318  | coding    | PF02854 |
| MSTRG. 839. 2 | 1037  | noncoding | -       |
| MSTRG. 840. 3 | 1451  | coding    | PF05208 |
| MSTRG. 840. 2 | 2211  | coding    | PF05208 |
| MSTRG. 841. 3 | 4153  | coding    | PF13757 |
| MSTRG. 841. 2 | 4479  | coding    | PF13757 |
| MSTRG. 854. 3 | 4121  | coding    | PF00005 |
| MSTRG. 855. 1 | 5141  | noncoding | -       |
| MSTRG. 855. 2 | 5732  | noncoding | -       |
| MSTRG. 848. 3 | 6790  | coding    | PF00651 |
| MSTRG. 848. 5 | 4597  | coding    | PF00651 |
| MSTRG. 848. 6 | 2444  | coding    | PF00651 |
| MSTRG. 848. 8 | 2476  | coding    | PF00651 |
| MSTRG. 859. 4 | 845   | coding    | PF03556 |
| MSTRG. 859. 6 | 1525  | noncoding | -       |
| MSTRG. 862. 2 | 6923  | coding    | PF16212 |
| MSTRG. 862. 5 | 1214  | noncoding | -       |

|                |       |           |         |
|----------------|-------|-----------|---------|
| MSTRG. 862. 7  | 1333  | noncoding | –       |
| MSTRG. 862. 6  | 4094  | coding    | PF16212 |
| MSTRG. 862. 3  | 4270  | coding    | PF16212 |
| MSTRG. 862. 8  | 1114  | coding    | PF16209 |
| MSTRG. 874. 1  | 2596  | noncoding | –       |
| MSTRG. 892. 3  | 7443  | noncoding | –       |
| MSTRG. 892. 2  | 7254  | noncoding | –       |
| MSTRG. 892. 1  | 7720  | noncoding | –       |
| MSTRG. 897. 2  | 5388  | coding    | PF04799 |
| MSTRG. 914. 4  | 2234  | noncoding | –       |
| MSTRG. 914. 3  | 6733  | noncoding | –       |
| MSTRG. 914. 5  | 2062  | noncoding | –       |
| MSTRG. 915. 2  | 2892  | noncoding | –       |
| MSTRG. 915. 3  | 2908  | noncoding | –       |
| MSTRG. 908. 1  | 232   | noncoding | –       |
| MSTRG. 920. 1  | 6148  | noncoding | –       |
| MSTRG. 921. 1  | 591   | noncoding | –       |
| MSTRG. 945. 1  | 629   | coding    | PF02800 |
| MSTRG. 934. 4  | 1661  | coding    | PF15015 |
| MSTRG. 951. 3  | 4108  | coding    | PF00621 |
| MSTRG. 952. 1  | 342   | noncoding | –       |
| MSTRG. 956. 4  | 2429  | noncoding | –       |
| MSTRG. 957. 1  | 16602 | noncoding | –       |
| MSTRG. 959. 1  | 834   | noncoding | –       |
| MSTRG. 965. 1  | 926   | noncoding | –       |
| MSTRG. 965. 2  | 3161  | noncoding | –       |
| MSTRG. 965. 3  | 538   | noncoding | –       |
| MSTRG. 979. 3  | 11959 | noncoding | –       |
| MSTRG. 979. 7  | 2961  | noncoding | –       |
| MSTRG. 980. 3  | 4964  | noncoding | –       |
| MSTRG. 981. 1  | 9865  | noncoding | –       |
| MSTRG. 980. 5  | 25559 | noncoding | –       |
| MSTRG. 980. 6  | 19375 | noncoding | –       |
| MSTRG. 980. 7  | 9626  | coding    | PF00069 |
| MSTRG. 985. 1  | 1485  | noncoding | –       |
| MSTRG. 967. 2  | 3871  | coding    | PF01287 |
| MSTRG. 972. 2  | 1216  | coding    | PF01776 |
| MSTRG. 974. 1  | 2327  | coding    | PF13906 |
| MSTRG. 975. 1  | 2726  | noncoding | –       |
| MSTRG. 991. 1  | 873   | noncoding | –       |
| MSTRG. 991. 2  | 923   | noncoding | –       |
| MSTRG. 991. 3  | 656   | noncoding | –       |
| MSTRG. 994. 1  | 1949  | noncoding | –       |
| MSTRG. 994. 2  | 2431  | noncoding | –       |
| MSTRG. 994. 3  | 1925  | noncoding | –       |
| MSTRG. 997. 1  | 6877  | coding    | PF00651 |
| MSTRG. 1000. 1 | 3712  | noncoding | –       |
| MSTRG. 1000. 2 | 3927  | noncoding | –       |
| MSTRG. 1005. 5 | 3684  | noncoding | –       |
| MSTRG. 1005. 6 | 4311  | noncoding | –       |
| MSTRG. 1002. 3 | 1227  | noncoding | –       |
| MSTRG. 1002. 4 | 1188  | noncoding | –       |
| MSTRG. 1008. 4 | 1081  | coding    | PF06840 |
| MSTRG. 1013. 4 | 2651  | noncoding | –       |

|                 |       |           |         |
|-----------------|-------|-----------|---------|
| MSTRG. 1013. 7  | 2691  | noncoding | -       |
| MSTRG. 1013. 8  | 2687  | noncoding | -       |
| MSTRG. 1013. 9  | 2613  | noncoding | -       |
| MSTRG. 1012. 2  | 4015  | noncoding | -       |
| MSTRG. 1012. 1  | 2210  | noncoding | -       |
| MSTRG. 1029. 1  | 2592  | coding    | PF04981 |
| MSTRG. 1029. 3  | 2629  | coding    | PF04981 |
| MSTRG. 1031. 1  | 7550  | coding    | PF00481 |
| MSTRG. 1031. 2  | 7277  | coding    | PF00481 |
| MSTRG. 1031. 3  | 2575  | noncoding | -       |
| MSTRG. 1041. 2  | 4311  | noncoding | -       |
| MSTRG. 1044. 3  | 3261  | noncoding | -       |
| MSTRG. 1036. 3  | 3272  | coding    | PF13553 |
| MSTRG. 1037. 1  | 1931  | coding    | PF03039 |
| MSTRG. 1060. 2  | 1073  | coding    | PF06907 |
| MSTRG. 1063. 1  | 1393  | coding    | PF06907 |
| MSTRG. 1063. 2  | 1201  | coding    | PF06907 |
| MSTRG. 1066. 1  | 1454  | noncoding | -       |
| MSTRG. 1066. 2  | 1498  | noncoding | -       |
| MSTRG. 1066. 3  | 962   | noncoding | -       |
| MSTRG. 1065. 1  | 227   | noncoding | -       |
| MSTRG. 1070. 1  | 473   | noncoding | -       |
| MSTRG. 1085. 2  | 4713  | coding    | PF07074 |
| MSTRG. 1086. 2  | 2682  | coding    | PF00248 |
| MSTRG. 1096. 1  | 3021  | coding    | PF00117 |
| MSTRG. 1097. 1  | 2344  | noncoding | -       |
| MSTRG. 1096. 2  | 8562  | coding    | PF00117 |
| MSTRG. 1108. 1  | 275   | noncoding | -       |
| MSTRG. 1119. 1  | 7339  | noncoding | -       |
| MSTRG. 1132. 1  | 13698 | noncoding | -       |
| MSTRG. 1125. 1  | 4084  | noncoding | -       |
| MSTRG. 1141. 1  | 1539  | noncoding | -       |
| MSTRG. 1149. 1  | 2740  | noncoding | -       |
| MSTRG. 1150. 1  | 457   | noncoding | -       |
| MSTRG. 1157. 6  | 5509  | noncoding | -       |
| MSTRG. 1157. 7  | 22857 | noncoding | -       |
| MSTRG. 1157. 8  | 3188  | noncoding | -       |
| MSTRG. 1157. 10 | 3019  | noncoding | -       |
| MSTRG. 1157. 9  | 3003  | noncoding | -       |
| MSTRG. 1158. 1  | 2676  | noncoding | -       |
| MSTRG. 1158. 2  | 3976  | noncoding | -       |
| MSTRG. 1159. 1  | 8625  | noncoding | -       |
| MSTRG. 1173. 1  | 3213  | noncoding | -       |
| MSTRG. 1174. 1  | 3382  | noncoding | -       |
| MSTRG. 1175. 1  | 21537 | noncoding | -       |
| MSTRG. 1161. 2  | 2093  | coding    | PF03145 |
| MSTRG. 1161. 3  | 2927  | noncoding | -       |
| MSTRG. 1164. 2  | 1275  | noncoding | -       |
| MSTRG. 1167. 1  | 285   | noncoding | -       |
| MSTRG. 1184. 1  | 1977  | noncoding | -       |
| MSTRG. 1189. 2  | 815   | noncoding | -       |
| MSTRG. 1190. 1  | 677   | noncoding | -       |
| MSTRG. 1194. 2  | 1625  | coding    | PF14763 |
| MSTRG. 1196. 2  | 2186  | noncoding | -       |

|                 |       |           |         |
|-----------------|-------|-----------|---------|
| MSTRG. 1207. 1  | 304   | noncoding | –       |
| MSTRG. 1209. 1  | 201   | noncoding | –       |
| MSTRG. 1214. 2  | 1041  | coding    | PF03803 |
| MSTRG. 1215. 1  | 1241  | noncoding | –       |
| MSTRG. 1211. 1  | 360   | noncoding | –       |
| MSTRG. 1236. 4  | 5657  | noncoding | –       |
| MSTRG. 1245. 2  | 2239  | coding    | PF08344 |
| MSTRG. 1250. 2  | 2835  | noncoding | –       |
| MSTRG. 1251. 1  | 1162  | noncoding | –       |
| MSTRG. 1252. 4  | 938   | noncoding | –       |
| MSTRG. 1253. 1  | 411   | noncoding | –       |
| MSTRG. 1259. 2  | 1089  | coding    | PF00370 |
| MSTRG. 1260. 1  | 1804  | noncoding | –       |
| MSTRG. 1261. 2  | 1242  | noncoding | –       |
| MSTRG. 1261. 5  | 1450  | coding    | PF08781 |
| MSTRG. 1261. 6  | 1541  | coding    | PF08781 |
| MSTRG. 1254. 1  | 726   | noncoding | –       |
| MSTRG. 1263. 1  | 5495  | noncoding | –       |
| MSTRG. 1267. 4  | 4855  | noncoding | –       |
| MSTRG. 1269. 1  | 478   | noncoding | –       |
| MSTRG. 1272. 1  | 5637  | coding    | PF00153 |
| MSTRG. 1272. 4  | 5009  | coding    | PF00153 |
| MSTRG. 1272. 6  | 3588  | coding    | PF00153 |
| MSTRG. 1272. 7  | 5724  | coding    | PF00153 |
| MSTRG. 1278. 2  | 2526  | noncoding | –       |
| MSTRG. 1278. 3  | 5293  | noncoding | –       |
| MSTRG. 1279. 2  | 4337  | coding    | PF04053 |
| MSTRG. 1288. 3  | 3937  | coding    | PF00613 |
| MSTRG. 1288. 4  | 3521  | coding    | PF00454 |
| MSTRG. 1288. 5  | 2809  | coding    | PF00454 |
| MSTRG. 1285. 1  | 720   | noncoding | –       |
| MSTRG. 1309. 1  | 2948  | noncoding | –       |
| MSTRG. 1310. 2  | 1897  | noncoding | –       |
| MSTRG. 1310. 1  | 879   | noncoding | –       |
| MSTRG. 1310. 3  | 286   | noncoding | –       |
| MSTRG. 1311. 1  | 10779 | coding    | PF00017 |
| MSTRG. 1311. 7  | 3115  | coding    | PF00017 |
| MSTRG. 1311. 5  | 2926  | coding    | PF00017 |
| MSTRG. 1311. 6  | 3055  | coding    | PF00017 |
| MSTRG. 1311. 8  | 6596  | coding    | PF00017 |
| MSTRG. 1311. 9  | 3104  | coding    | PF00017 |
| MSTRG. 1311. 10 | 1873  | coding    | PF00017 |
| MSTRG. 1309. 2  | 2817  | noncoding | –       |
| MSTRG. 1312. 1  | 1779  | noncoding | –       |
| MSTRG. 1314. 2  | 1478  | noncoding | –       |
| MSTRG. 1317. 1  | 1912  | noncoding | –       |
| MSTRG. 1318. 2  | 2861  | coding    | PF08514 |
| MSTRG. 1318. 3  | 3458  | coding    | PF08514 |
| MSTRG. 1319. 1  | 2063  | noncoding | –       |
| MSTRG. 1320. 1  | 3196  | noncoding | –       |
| MSTRG. 1321. 1  | 1464  | noncoding | –       |
| MSTRG. 1323. 1  | 10102 | noncoding | –       |
| MSTRG. 1318. 4  | 4913  | noncoding | –       |
| MSTRG. 1325. 1  | 5485  | coding    | PF01039 |

|                 |       |           |         |
|-----------------|-------|-----------|---------|
| MSTRG. 1332. 2  | 10108 | coding    | PF16685 |
| MSTRG. 1338. 1  | 3433  | coding    | PF17045 |
| MSTRG. 1338. 2  | 3005  | coding    | PF17045 |
| MSTRG. 1338. 4  | 3063  | coding    | PF17045 |
| MSTRG. 1338. 3  | 2937  | coding    | PF17045 |
| MSTRG. 1338. 7  | 2533  | coding    | PF17045 |
| MSTRG. 1338. 8  | 2338  | coding    | PF17045 |
| MSTRG. 1339. 1  | 1295  | coding    | PF05839 |
| MSTRG. 1344. 2  | 3722  | coding    | PF00071 |
| MSTRG. 1346. 1  | 4771  | coding    | PF09439 |
| MSTRG. 1351. 5  | 5113  | coding    | PF12738 |
| MSTRG. 1351. 6  | 5392  | coding    | PF12738 |
| MSTRG. 1352. 6  | 2937  | coding    | PF15359 |
| MSTRG. 1352. 2  | 2768  | coding    | PF15359 |
| MSTRG. 1352. 4  | 2552  | coding    | PF15359 |
| MSTRG. 1352. 9  | 2699  | coding    | PF15359 |
| MSTRG. 1352. 11 | 1166  | coding    | PF15359 |
| MSTRG. 1352. 12 | 1188  | coding    | PF15359 |
| MSTRG. 1352. 10 | 939   | coding    | PF15359 |
| MSTRG. 1352. 13 | 1222  | coding    | PF15359 |
| MSTRG. 1352. 14 | 1044  | coding    | PF15359 |
| MSTRG. 1352. 15 | 1326  | coding    | PF15359 |
| MSTRG. 1355. 4  | 2229  | coding    | PF15759 |
| MSTRG. 1363. 1  | 1382  | noncoding | –       |
| MSTRG. 1367. 2  | 6001  | noncoding | –       |
| MSTRG. 1367. 3  | 4006  | noncoding | –       |
| MSTRG. 1380. 9  | 2339  | noncoding | –       |
| MSTRG. 1380. 7  | 3406  | coding    | PF00122 |
| MSTRG. 1380. 5  | 3330  | coding    | PF00122 |
| MSTRG. 1380. 8  | 3368  | coding    | PF00122 |
| MSTRG. 1380. 10 | 2202  | coding    | PF00122 |
| MSTRG. 1380. 11 | 1353  | noncoding | –       |
| MSTRG. 1382. 1  | 1423  | noncoding | –       |
| MSTRG. 1384. 4  | 5851  | coding    | PF00439 |
| MSTRG. 1384. 3  | 10228 | coding    | PF00439 |
| MSTRG. 1384. 5  | 2261  | noncoding | –       |
| MSTRG. 1387. 1  | 1400  | coding    | PF01359 |
| MSTRG. 1391. 1  | 2349  | noncoding | –       |
| MSTRG. 1395. 10 | 2814  | coding    | PF15619 |
| MSTRG. 1395. 11 | 2407  | coding    | PF15619 |
| MSTRG. 1395. 12 | 2343  | coding    | PF15619 |
| MSTRG. 1395. 13 | 2648  | coding    | PF15619 |
| MSTRG. 1395. 14 | 2249  | coding    | PF15619 |
| MSTRG. 1395. 15 | 2501  | coding    | PF15619 |
| MSTRG. 1395. 17 | 2380  | coding    | PF15619 |
| MSTRG. 1395. 18 | 2484  | coding    | PF15619 |
| MSTRG. 1395. 19 | 2452  | coding    | PF15619 |
| MSTRG. 1395. 20 | 2538  | coding    | PF15619 |
| MSTRG. 1395. 21 | 2375  | coding    | PF15619 |
| MSTRG. 1395. 22 | 2306  | coding    | PF15619 |
| MSTRG. 1395. 23 | 2458  | coding    | PF15619 |
| MSTRG. 1395. 24 | 2453  | coding    | PF15619 |
| MSTRG. 1396. 1  | 3276  | noncoding | –       |
| MSTRG. 1396. 2  | 2871  | noncoding | –       |

|                |       |           |         |
|----------------|-------|-----------|---------|
| MSTRG. 1394. 1 | 290   | noncoding | –       |
| MSTRG. 1398. 1 | 2247  | noncoding | –       |
| MSTRG. 1398. 2 | 1881  | noncoding | –       |
| MSTRG. 1407. 1 | 581   | noncoding | –       |
| MSTRG. 1408. 1 | 1263  | noncoding | –       |
| MSTRG. 1414. 3 | 1118  | noncoding | –       |
| MSTRG. 1415. 1 | 2427  | noncoding | –       |
| MSTRG. 1415. 3 | 2959  | noncoding | –       |
| MSTRG. 1416. 2 | 1785  | coding    | PF00233 |
| MSTRG. 1419. 4 | 2481  | noncoding | –       |
| MSTRG. 1419. 3 | 1761  | noncoding | –       |
| MSTRG. 1420. 1 | 1157  | noncoding | –       |
| MSTRG. 1421. 1 | 2498  | coding    | PF16493 |
| MSTRG. 1426. 2 | 2591  | coding    | PF00069 |
| MSTRG. 1432. 3 | 766   | noncoding | –       |
| MSTRG. 1432. 2 | 1002  | noncoding | –       |
| MSTRG. 1433. 1 | 2566  | coding    | PF05997 |
| MSTRG. 1433. 5 | 6677  | coding    | PF05997 |
| MSTRG. 1429. 2 | 6349  | coding    | PF08543 |
| MSTRG. 1429. 3 | 6732  | coding    | PF08543 |
| MSTRG. 1428. 1 | 573   | noncoding | –       |
| MSTRG. 1436. 1 | 8252  | noncoding | –       |
| MSTRG. 1436. 4 | 5668  | noncoding | –       |
| MSTRG. 1436. 2 | 8206  | noncoding | –       |
| MSTRG. 1436. 3 | 11908 | noncoding | –       |
| MSTRG. 1437. 1 | 2673  | noncoding | –       |
| MSTRG. 1438. 1 | 8281  | noncoding | –       |
| MSTRG. 1436. 7 | 5744  | noncoding | –       |
| MSTRG. 1436. 6 | 8608  | noncoding | –       |
| MSTRG. 1439. 2 | 4070  | coding    | PF04003 |
| MSTRG. 1440. 1 | 894   | noncoding | –       |
| MSTRG. 1441. 1 | 1392  | noncoding | –       |
| MSTRG. 1447. 1 | 2899  | noncoding | –       |
| MSTRG. 1449. 1 | 2207  | noncoding | –       |
| MSTRG. 1450. 1 | 2879  | noncoding | –       |
| MSTRG. 1451. 2 | 906   | noncoding | –       |
| MSTRG. 1451. 3 | 953   | noncoding | –       |
| MSTRG. 1454. 5 | 2016  | coding    | PF00179 |
| MSTRG. 1455. 2 | 1196  | noncoding | –       |
| MSTRG. 1455. 1 | 992   | noncoding | –       |
| MSTRG. 1460. 1 | 1037  | noncoding | –       |
| MSTRG. 1463. 2 | 1501  | coding    | PF02137 |
| MSTRG. 1464. 1 | 2525  | noncoding | –       |
| MSTRG. 1465. 2 | 2144  | coding    | PF10250 |
| MSTRG. 1467. 2 | 4285  | coding    | PF06482 |
| MSTRG. 1469. 1 | 2465  | coding    | PF01770 |
| MSTRG. 1470. 1 | 1880  | noncoding | –       |
| MSTRG. 1475. 3 | 4992  | noncoding | –       |
| MSTRG. 1475. 2 | 1949  | coding    | PF00013 |
| MSTRG. 1475. 4 | 1986  | coding    | PF00013 |
| MSTRG. 1475. 5 | 2068  | coding    | PF00013 |
| MSTRG. 1475. 6 | 1911  | coding    | PF00013 |
| MSTRG. 1477. 1 | 10235 | noncoding | –       |
| MSTRG. 1473. 1 | 4010  | coding    | PF00092 |

|                 |       |           |         |
|-----------------|-------|-----------|---------|
| MSTRG. 1473. 2  | 3939  | coding    | PF00092 |
| MSTRG. 1494. 2  | 940   | coding    | PF15059 |
| MSTRG. 1495. 1  | 927   | noncoding | —       |
| MSTRG. 1496. 1  | 6383  | coding    | PF16769 |
| MSTRG. 1497. 1  | 4239  | noncoding | —       |
| MSTRG. 1497. 2  | 2352  | noncoding | —       |
| MSTRG. 1499. 1  | 4282  | coding    | PF02130 |
| MSTRG. 1500. 3  | 1648  | noncoding | —       |
| MSTRG. 1501. 5  | 9914  | noncoding | —       |
| MSTRG. 1501. 1  | 9970  | noncoding | —       |
| MSTRG. 1501. 2  | 9811  | noncoding | —       |
| MSTRG. 1501. 3  | 9793  | noncoding | —       |
| MSTRG. 1501. 4  | 9991  | noncoding | —       |
| MSTRG. 1501. 6  | 10081 | noncoding | —       |
| MSTRG. 1501. 9  | 9808  | noncoding | —       |
| MSTRG. 1501. 10 | 9972  | noncoding | —       |
| MSTRG. 1501. 11 | 9948  | noncoding | —       |
| MSTRG. 1501. 14 | 6479  | noncoding | —       |
| MSTRG. 1481. 1  | 667   | noncoding | —       |
| MSTRG. 1483. 2  | 2973  | coding    | PF15683 |
| MSTRG. 1484. 1  | 1225  | noncoding | —       |
| MSTRG. 1512. 6  | 1759  | noncoding | —       |
| MSTRG. 1512. 5  | 1484  | noncoding | —       |
| MSTRG. 1512. 7  | 35438 | noncoding | —       |
| MSTRG. 1512. 10 | 12550 | coding    | PF02093 |
| MSTRG. 1512. 8  | 49985 | coding    | PF02093 |
| MSTRG. 1512. 9  | 12905 | noncoding | —       |
| MSTRG. 1512. 11 | 33095 | coding    | PF02093 |
| MSTRG. 1512. 12 | 16815 | coding    | PF02994 |
| MSTRG. 1512. 13 | 20386 | noncoding | —       |
| MSTRG. 1512. 14 | 48143 | coding    | PF02994 |
| MSTRG. 1512. 15 | 31165 | coding    | PF02994 |
| MSTRG. 1512. 16 | 9064  | coding    | PF02994 |
| MSTRG. 1512. 17 | 3323  | noncoding | —       |
| MSTRG. 1512. 18 | 6011  | coding    | PF00106 |
| MSTRG. 1512. 19 | 9369  | noncoding | —       |
| MSTRG. 1514. 1  | 1464  | noncoding | —       |
| MSTRG. 1509. 3  | 7455  | coding    | PF04118 |
| MSTRG. 1511. 2  | 3101  | coding    | PF15512 |
| MSTRG. 1511. 3  | 6025  | coding    | PF15512 |
| MSTRG. 1511. 5  | 15714 | coding    | PF15512 |
| MSTRG. 1516. 1  | 675   | noncoding | —       |
| MSTRG. 1518. 1  | 1247  | noncoding | —       |
| MSTRG. 1519. 1  | 790   | noncoding | —       |
| MSTRG. 1520. 2  | 4414  | coding    | PF03099 |
| MSTRG. 1535. 1  | 3533  | noncoding | —       |
| MSTRG. 1536. 1  | 469   | noncoding | —       |
| MSTRG. 1537. 4  | 626   | coding    | PF08510 |
| MSTRG. 1538. 1  | 4020  | noncoding | —       |
| MSTRG. 1538. 7  | 8474  | noncoding | —       |
| MSTRG. 1538. 8  | 1819  | noncoding | —       |
| MSTRG. 1538. 9  | 5089  | noncoding | —       |
| MSTRG. 1538. 10 | 4773  | noncoding | —       |
| MSTRG. 1538. 12 | 6762  | noncoding | —       |

|                 |       |           |         |
|-----------------|-------|-----------|---------|
| MSTRG. 1538. 13 | 6981  | noncoding | –       |
| MSTRG. 1526. 2  | 2749  | coding    | PF03643 |
| MSTRG. 1531. 6  | 2134  | noncoding | –       |
| MSTRG. 1531. 5  | 9026  | noncoding | –       |
| MSTRG. 1531. 4  | 5035  | coding    | PF00069 |
| MSTRG. 1531. 7  | 17349 | coding    | PF00069 |
| MSTRG. 1532. 1  | 1785  | noncoding | –       |
| MSTRG. 1533. 1  | 2264  | noncoding | –       |
| MSTRG. 1531. 8  | 5227  | coding    | PF00069 |
| MSTRG. 1531. 9  | 5254  | coding    | PF00069 |
| MSTRG. 1534. 1  | 4151  | noncoding | –       |
| MSTRG. 1531. 10 | 7302  | coding    | PF00069 |
| MSTRG. 1528. 1  | 2444  | noncoding | –       |
| MSTRG. 1528. 3  | 3067  | noncoding | –       |
| MSTRG. 1530. 1  | 6984  | coding    | PF01007 |
| MSTRG. 1544. 1  | 3160  | coding    | PF00178 |
| MSTRG. 1544. 2  | 2859  | coding    | PF00178 |
| MSTRG. 1545. 1  | 224   | noncoding | –       |
| MSTRG. 1549. 1  | 778   | noncoding | –       |
| MSTRG. 1550. 5  | 2949  | noncoding | –       |
| MSTRG. 1550. 6  | 4408  | noncoding | –       |
| MSTRG. 1550. 7  | 2473  | noncoding | –       |
| MSTRG. 1554. 2  | 2473  | coding    | PF05276 |
| MSTRG. 1555. 1  | 1969  | noncoding | –       |
| MSTRG. 1556. 1  | 5429  | noncoding | –       |
| MSTRG. 1562. 3  | 1100  | noncoding | –       |
| MSTRG. 1562. 4  | 2307  | noncoding | –       |
| MSTRG. 1562. 5  | 1068  | noncoding | –       |
| MSTRG. 1563. 1  | 1491  | coding    | PF09816 |
| MSTRG. 1563. 3  | 4021  | coding    | PF09816 |
| MSTRG. 1558. 2  | 1568  | noncoding | –       |
| MSTRG. 1560. 1  | 2208  | noncoding | –       |
| MSTRG. 1576. 2  | 2053  | noncoding | –       |
| MSTRG. 1578. 4  | 4764  | coding    | PF12796 |
| MSTRG. 1578. 7  | 5253  | coding    | PF12796 |
| MSTRG. 1578. 9  | 2431  | noncoding | –       |
| MSTRG. 1578. 11 | 9741  | noncoding | –       |
| MSTRG. 1578. 10 | 5818  | noncoding | –       |
| MSTRG. 1578. 12 | 11419 | noncoding | –       |
| MSTRG. 1578. 13 | 15302 | noncoding | –       |
| MSTRG. 1578. 14 | 6310  | noncoding | –       |
| MSTRG. 1567. 3  | 2045  | noncoding | –       |
| MSTRG. 1567. 4  | 1952  | noncoding | –       |
| MSTRG. 1567. 5  | 1662  | noncoding | –       |
| MSTRG. 1567. 7  | 2342  | noncoding | –       |
| MSTRG. 1568. 2  | 2314  | coding    | PF15250 |
| MSTRG. 1568. 4  | 2289  | coding    | PF15250 |
| MSTRG. 1568. 6  | 2618  | coding    | PF15250 |
| MSTRG. 1568. 5  | 2719  | coding    | PF15250 |
| MSTRG. 1573. 1  | 4177  | noncoding | –       |
| MSTRG. 1574. 2  | 1227  | coding    | PF00076 |
| MSTRG. 1574. 3  | 2708  | coding    | PF00076 |
| MSTRG. 1589. 1  | 693   | noncoding | –       |
| MSTRG. 1590. 1  | 1556  | noncoding | –       |



|                |       |           |         |
|----------------|-------|-----------|---------|
| MSTRG. 1592. 2 | 5648  | noncoding | —       |
| MSTRG. 1592. 1 | 8452  | noncoding | —       |
| MSTRG. 1592. 4 | 2086  | noncoding | —       |
| MSTRG. 1592. 5 | 2898  | noncoding | —       |
| MSTRG. 1592. 6 | 1956  | noncoding | —       |
| MSTRG. 1593. 1 | 698   | noncoding | —       |
| MSTRG. 1592. 7 | 2751  | noncoding | —       |
| MSTRG. 1592. 8 | 1994  | noncoding | —       |
| MSTRG. 1594. 1 | 1661  | noncoding | —       |
| MSTRG. 1595. 1 | 2133  | noncoding | —       |
| MSTRG. 1596. 1 | 3306  | noncoding | —       |
| MSTRG. 1597. 1 | 942   | noncoding | —       |
| MSTRG. 1598. 1 | 3230  | noncoding | —       |
| MSTRG. 1596. 2 | 8377  | coding    | PF02994 |
| MSTRG. 1583. 1 | 265   | noncoding | —       |
| MSTRG. 1583. 2 | 360   | noncoding | —       |
| MSTRG. 1585. 1 | 515   | noncoding | —       |
| MSTRG. 1600. 1 | 365   | noncoding | —       |
| MSTRG. 1603. 1 | 1210  | noncoding | —       |
| MSTRG. 1604. 1 | 345   | noncoding | —       |
| MSTRG. 1606. 1 | 1398  | noncoding | —       |
| MSTRG. 1610. 1 | 990   | noncoding | —       |
| MSTRG. 1610. 3 | 2587  | noncoding | —       |
| MSTRG. 1610. 4 | 1328  | noncoding | —       |
| MSTRG. 1613. 3 | 6703  | noncoding | —       |
| MSTRG. 1614. 1 | 1502  | noncoding | —       |
| MSTRG. 1614. 2 | 1548  | noncoding | —       |
| MSTRG. 1614. 3 | 1194  | coding    | PF00481 |
| MSTRG. 1614. 4 | 2953  | noncoding | —       |
| MSTRG. 1618. 1 | 8654  | coding    | PF06466 |
| MSTRG. 1618. 2 | 808   | coding    | PF06466 |
| MSTRG. 1618. 4 | 3394  | coding    | PF06466 |
| MSTRG. 1618. 3 | 3874  | coding    | PF06466 |
| MSTRG. 1619. 1 | 2077  | noncoding | —       |
| MSTRG. 1619. 2 | 2461  | noncoding | —       |
| MSTRG. 1623. 2 | 2107  | coding    | PF02023 |
| MSTRG. 1637. 4 | 5416  | noncoding | —       |
| MSTRG. 1637. 5 | 6652  | coding    | PF16186 |
| MSTRG. 1632. 1 | 6583  | noncoding | —       |
| MSTRG. 1632. 2 | 5764  | noncoding | —       |
| MSTRG. 1644. 3 | 14784 | coding    | PF00632 |
| MSTRG. 1642. 3 | 2996  | coding    | PF05653 |
| MSTRG. 1640. 1 | 2030  | noncoding | —       |
| MSTRG. 1647. 3 | 1893  | noncoding | —       |
| MSTRG. 1650. 1 | 10151 | noncoding | —       |
| MSTRG. 1650. 2 | 10044 | noncoding | —       |
| MSTRG. 1650. 3 | 9992  | noncoding | —       |
| MSTRG. 1653. 1 | 3005  | coding    | PF14944 |
| MSTRG. 1654. 1 | 3414  | noncoding | —       |
| MSTRG. 1654. 2 | 3411  | noncoding | —       |
| MSTRG. 1654. 3 | 3722  | noncoding | —       |
| MSTRG. 1657. 1 | 873   | noncoding | —       |
| MSTRG. 1659. 1 | 496   | noncoding | —       |
| MSTRG. 1662. 1 | 13359 | coding    | PF16014 |

|                 |       |           |         |
|-----------------|-------|-----------|---------|
| MSTRG. 1662. 4  | 3972  | coding    | PF16014 |
| MSTRG. 1662. 7  | 4011  | coding    | PF16014 |
| MSTRG. 1662. 9  | 3889  | coding    | PF16014 |
| MSTRG. 1662. 10 | 4658  | coding    | PF16014 |
| MSTRG. 1662. 12 | 3849  | coding    | PF16014 |
| MSTRG. 1662. 13 | 3192  | coding    | PF16014 |
| MSTRG. 1663. 1  | 5349  | coding    | PF01871 |
| MSTRG. 1663. 5  | 516   | noncoding | —       |
| MSTRG. 1663. 4  | 2251  | noncoding | —       |
| MSTRG. 1663. 3  | 1583  | noncoding | —       |
| MSTRG. 1665. 1  | 4198  | noncoding | —       |
| MSTRG. 1667. 1  | 3095  | noncoding | —       |
| MSTRG. 1671. 1  | 2883  | coding    | PF00001 |
| MSTRG. 1673. 5  | 5206  | noncoding | —       |
| MSTRG. 1673. 4  | 4595  | noncoding | —       |
| MSTRG. 1673. 3  | 6046  | noncoding | —       |
| MSTRG. 1675. 1  | 8938  | noncoding | —       |
| MSTRG. 1676. 1  | 244   | noncoding | —       |
| MSTRG. 1677. 1  | 974   | noncoding | —       |
| MSTRG. 1678. 1  | 288   | noncoding | —       |
| MSTRG. 1681. 1  | 1599  | coding    | PF00089 |
| MSTRG. 1685. 2  | 3059  | noncoding | —       |
| MSTRG. 1685. 3  | 1709  | noncoding | —       |
| MSTRG. 1689. 1  | 322   | noncoding | —       |
| MSTRG. 1691. 1  | 2246  | coding    | PF15127 |
| MSTRG. 1692. 1  | 696   | coding    | PF15127 |
| MSTRG. 1697. 2  | 2098  | coding    | PF00517 |
| MSTRG. 1697. 1  | 812   | noncoding | —       |
| MSTRG. 1697. 3  | 6450  | coding    | PF00607 |
| MSTRG. 1697. 4  | 1056  | noncoding | —       |
| MSTRG. 1709. 2  | 4127  | coding    | PF12796 |
| MSTRG. 1709. 4  | 4327  | coding    | PF12796 |
| MSTRG. 1709. 6  | 3986  | coding    | PF12796 |
| MSTRG. 1709. 8  | 3246  | coding    | PF12796 |
| MSTRG. 1716. 2  | 1647  | coding    | PF00640 |
| MSTRG. 1716. 1  | 1475  | coding    | PF00640 |
| MSTRG. 1716. 3  | 1110  | coding    | PF00640 |
| MSTRG. 1717. 1  | 1816  | noncoding | —       |
| MSTRG. 1725. 1  | 4991  | noncoding | —       |
| MSTRG. 1726. 1  | 5290  | noncoding | —       |
| MSTRG. 1721. 1  | 321   | noncoding | —       |
| MSTRG. 1721. 2  | 395   | noncoding | —       |
| MSTRG. 1729. 2  | 1897  | noncoding | —       |
| MSTRG. 1730. 1  | 6301  | coding    | PF00078 |
| MSTRG. 1731. 1  | 1819  | noncoding | —       |
| MSTRG. 1734. 1  | 5731  | coding    | PF10577 |
| MSTRG. 1734. 2  | 1688  | noncoding | —       |
| MSTRG. 1727. 1  | 10124 | coding    | PF01198 |
| MSTRG. 1727. 2  | 894   | noncoding | —       |
| MSTRG. 1740. 3  | 2155  | noncoding | —       |
| MSTRG. 1740. 2  | 1977  | noncoding | —       |
| MSTRG. 1745. 1  | 20894 | coding    | PF15783 |
| MSTRG. 1745. 3  | 20967 | coding    | PF15783 |
| MSTRG. 1753. 1  | 391   | noncoding | —       |

|                |       |           |         |
|----------------|-------|-----------|---------|
| MSTRG. 1753. 2 | 458   | noncoding | -       |
| MSTRG. 1768. 1 | 1135  | coding    | PF05172 |
| MSTRG. 1768. 2 | 1541  | coding    | PF05172 |
| MSTRG. 1768. 3 | 1370  | noncoding | -       |
| MSTRG. 1770. 2 | 624   | coding    | PF09735 |
| MSTRG. 1772. 1 | 4283  | coding    | PF00226 |
| MSTRG. 1772. 3 | 3975  | coding    | PF00226 |
| MSTRG. 1772. 4 | 1532  | coding    | PF00226 |
| MSTRG. 1773. 1 | 474   | noncoding | -       |
| MSTRG. 1774. 1 | 227   | noncoding | -       |
| MSTRG. 1777. 2 | 1734  | coding    | PF00233 |
| MSTRG. 1777. 3 | 2956  | coding    | PF00233 |
| MSTRG. 1782. 1 | 5481  | coding    | PF14723 |
| MSTRG. 1782. 5 | 4910  | coding    | PF14723 |
| MSTRG. 1782. 4 | 6376  | coding    | PF14723 |
| MSTRG. 1783. 1 | 6921  | noncoding | -       |
| MSTRG. 1784. 1 | 11439 | noncoding | -       |
| MSTRG. 1787. 1 | 506   | noncoding | -       |
| MSTRG. 1787. 2 | 499   | noncoding | -       |
| MSTRG. 1779. 1 | 401   | noncoding | -       |
| MSTRG. 1780. 1 | 1963  | noncoding | -       |
| MSTRG. 1791. 2 | 2074  | coding    | PF00781 |
| MSTRG. 1791. 3 | 1980  | coding    | PF00781 |
| MSTRG. 1798. 1 | 4198  | noncoding | -       |
| MSTRG. 1799. 1 | 5681  | coding    | PF00179 |
| MSTRG. 1799. 2 | 3875  | coding    | PF00179 |
| MSTRG. 1799. 3 | 2052  | coding    | PF00179 |
| MSTRG. 1799. 4 | 1095  | coding    | PF00179 |
| MSTRG. 1799. 7 | 2938  | coding    | PF00179 |
| MSTRG. 1799. 6 | 1423  | coding    | PF00179 |
| MSTRG. 1798. 2 | 4969  | noncoding | -       |
| MSTRG. 1798. 3 | 10417 | noncoding | -       |
| MSTRG. 1799. 8 | 4560  | noncoding | -       |
| MSTRG. 1805. 1 | 3623  | noncoding | -       |
| MSTRG. 1805. 3 | 2674  | noncoding | -       |
| MSTRG. 1801. 1 | 616   | noncoding | -       |
| MSTRG. 1801. 2 | 580   | noncoding | -       |
| MSTRG. 1801. 3 | 1731  | noncoding | -       |
| MSTRG. 1804. 1 | 1837  | coding    | PF07679 |
| MSTRG. 1819. 1 | 68416 | coding    | PF00069 |
| MSTRG. 1811. 3 | 1003  | coding    | PF00254 |
| MSTRG. 1814. 1 | 7597  | coding    | PF01237 |
| MSTRG. 1814. 3 | 4405  | coding    | PF01237 |
| MSTRG. 1814. 4 | 4501  | coding    | PF01237 |
| MSTRG. 1814. 2 | 4586  | coding    | PF01237 |
| MSTRG. 1814. 7 | 5234  | coding    | PF01237 |
| MSTRG. 1814. 8 | 1507  | noncoding | -       |
| MSTRG. 1818. 1 | 4596  | noncoding | -       |
| MSTRG. 1818. 3 | 4599  | noncoding | -       |
| MSTRG. 1832. 1 | 7304  | noncoding | -       |
| MSTRG. 1832. 3 | 2076  | noncoding | -       |
| MSTRG. 1833. 2 | 2442  | noncoding | -       |
| MSTRG. 1833. 1 | 1146  | noncoding | -       |
| MSTRG. 1833. 3 | 1660  | noncoding | -       |

|                 |       |           |         |
|-----------------|-------|-----------|---------|
| MSTRG. 1834. 1  | 3092  | noncoding | –       |
| MSTRG. 1840. 1  | 1429  | noncoding | –       |
| MSTRG. 1829. 1  | 3310  | noncoding | –       |
| MSTRG. 1841. 5  | 940   | noncoding | –       |
| MSTRG. 1847. 1  | 2215  | coding    | PF10058 |
| MSTRG. 1847. 2  | 3565  | coding    | PF10058 |
| MSTRG. 1869. 1  | 3871  | noncoding | –       |
| MSTRG. 1868. 11 | 35981 | noncoding | –       |
| MSTRG. 1868. 12 | 7977  | noncoding | –       |
| MSTRG. 1868. 13 | 2349  | noncoding | –       |
| MSTRG. 1873. 1  | 1407  | noncoding | –       |
| MSTRG. 1874. 1  | 34390 | noncoding | –       |
| MSTRG. 1874. 2  | 16937 | noncoding | –       |
| MSTRG. 1849. 4  | 2149  | noncoding | –       |
| MSTRG. 1850. 1  | 2928  | noncoding | –       |
| MSTRG. 1856. 4  | 3473  | noncoding | –       |
| MSTRG. 1857. 1  | 6096  | noncoding | –       |
| MSTRG. 1860. 1  | 1638  | coding    | PF06071 |
| MSTRG. 1860. 5  | 7782  | coding    | PF01926 |
| MSTRG. 1860. 6  | 3087  | coding    | PF01926 |
| MSTRG. 1860. 3  | 2209  | coding    | PF06071 |
| MSTRG. 1860. 4  | 2013  | coding    | PF06071 |
| MSTRG. 1862. 1  | 583   | noncoding | –       |
| MSTRG. 1860. 7  | 6323  | coding    | PF06071 |
| MSTRG. 1864. 1  | 2720  | noncoding | –       |
| MSTRG. 1865. 1  | 1854  | noncoding | –       |
| MSTRG. 1866. 1  | 9772  | noncoding | –       |
| MSTRG. 1867. 2  | 3832  | noncoding | –       |
| MSTRG. 1867. 3  | 3887  | noncoding | –       |
| MSTRG. 1891. 2  | 6858  | coding    | PF07714 |
| MSTRG. 1895. 2  | 5378  | coding    | PF10436 |
| MSTRG. 1895. 3  | 551   | noncoding | –       |
| MSTRG. 1895. 5  | 1454  | coding    | PF10436 |
| MSTRG. 1895. 4  | 1542  | coding    | PF10436 |
| MSTRG. 1900. 3  | 1825  | coding    | PF10394 |
| MSTRG. 1900. 4  | 1924  | coding    | PF10394 |
| MSTRG. 1900. 5  | 1481  | coding    | PF10394 |
| MSTRG. 1900. 6  | 1189  | noncoding | –       |
| MSTRG. 1902. 4  | 2255  | noncoding | –       |
| MSTRG. 1906. 1  | 1615  | noncoding | –       |
| MSTRG. 1907. 2  | 3629  | coding    | PF15802 |
| MSTRG. 1907. 3  | 3639  | coding    | PF15802 |
| MSTRG. 1907. 4  | 3563  | coding    | PF15802 |
| MSTRG. 1911. 1  | 626   | noncoding | –       |
| MSTRG. 1912. 2  | 3853  | noncoding | –       |
| MSTRG. 1912. 4  | 1143  | noncoding | –       |
| MSTRG. 1912. 7  | 7046  | coding    | PF00069 |
| MSTRG. 1914. 1  | 1316  | noncoding | –       |
| MSTRG. 1912. 8  | 1807  | noncoding | –       |
| MSTRG. 1912. 9  | 6839  | coding    | PF00069 |
| MSTRG. 1909. 2  | 2261  | coding    | PF04495 |
| MSTRG. 1910. 1  | 625   | noncoding | –       |
| MSTRG. 1922. 1  | 934   | noncoding | –       |
| MSTRG. 1922. 4  | 1635  | noncoding | –       |

|                 |       |           |         |
|-----------------|-------|-----------|---------|
| MSTRG. 1922. 6  | 1639  | noncoding | –       |
| MSTRG. 1922. 5  | 1018  | noncoding | –       |
| MSTRG. 1923. 1  | 346   | noncoding | –       |
| MSTRG. 1924. 1  | 938   | noncoding | –       |
| MSTRG. 1924. 2  | 796   | noncoding | –       |
| MSTRG. 1928. 3  | 5115  | coding    | PF00063 |
| MSTRG. 1928. 5  | 5122  | coding    | PF00063 |
| MSTRG. 1928. 7  | 4930  | coding    | PF00063 |
| MSTRG. 1928. 8  | 1421  | noncoding | –       |
| MSTRG. 1928. 9  | 3890  | coding    | PF00063 |
| MSTRG. 1928. 10 | 7864  | coding    | PF01359 |
| MSTRG. 1930. 1  | 7548  | noncoding | –       |
| MSTRG. 1928. 11 | 4852  | noncoding | –       |
| MSTRG. 1928. 12 | 17946 | noncoding | –       |
| MSTRG. 1928. 13 | 10750 | noncoding | –       |
| MSTRG. 1920. 4  | 7991  | coding    | PF02207 |
| MSTRG. 1920. 5  | 7974  | coding    | PF02207 |
| MSTRG. 1920. 6  | 4192  | noncoding | –       |
| MSTRG. 1920. 7  | 6852  | coding    | PF02207 |
| MSTRG. 1921. 1  | 3176  | coding    | PF00078 |
| MSTRG. 1918. 3  | 2545  | coding    | PF05383 |
| MSTRG. 1940. 1  | 10100 | noncoding | –       |
| MSTRG. 1940. 2  | 9950  | coding    | PF00651 |
| MSTRG. 1940. 5  | 6731  | coding    | PF00651 |
| MSTRG. 1940. 4  | 6856  | coding    | PF00651 |
| MSTRG. 1941. 1  | 8733  | noncoding | –       |
| MSTRG. 1943. 1  | 3704  | coding    | PF00078 |
| MSTRG. 1943. 2  | 1891  | noncoding | –       |
| MSTRG. 1943. 4  | 1308  | coding    | PF06888 |
| MSTRG. 1945. 2  | 1047  | noncoding | –       |
| MSTRG. 1948. 1  | 1342  | noncoding | –       |
| MSTRG. 1949. 1  | 1361  | noncoding | –       |
| MSTRG. 1951. 1  | 3042  | coding    | PF07289 |
| MSTRG. 1934. 1  | 15307 | coding    | PF00057 |
| MSTRG. 1953. 1  | 2578  | noncoding | –       |
| MSTRG. 1954. 1  | 4334  | noncoding | –       |
| MSTRG. 1995. 1  | 3928  | noncoding | –       |
| MSTRG. 2012. 1  | 3912  | noncoding | –       |
| MSTRG. 2013. 1  | 371   | noncoding | –       |
| MSTRG. 2022. 1  | 3387  | noncoding | –       |
| MSTRG. 2023. 1  | 10824 | noncoding | –       |
| MSTRG. 2023. 2  | 5156  | noncoding | –       |
| MSTRG. 2025. 1  | 3127  | noncoding | –       |
| MSTRG. 2028. 1  | 1877  | noncoding | –       |
| MSTRG. 1959. 1  | 4793  | noncoding | –       |
| MSTRG. 1959. 3  | 4330  | noncoding | –       |
| MSTRG. 1960. 1  | 2707  | coding    | PF00652 |
| MSTRG. 1962. 1  | 921   | noncoding | –       |
| MSTRG. 1962. 2  | 738   | noncoding | –       |
| MSTRG. 1968. 3  | 5275  | coding    | PF09469 |
| MSTRG. 1968. 8  | 4030  | coding    | PF09469 |
| MSTRG. 1972. 2  | 2627  | coding    | PF08947 |
| MSTRG. 1972. 6  | 6478  | noncoding | –       |
| MSTRG. 1972. 4  | 2498  | coding    | PF08947 |

|                 |      |           |         |
|-----------------|------|-----------|---------|
| MSTRG. 1972. 3  | 1845 | coding    | PF08947 |
| MSTRG. 1972. 8  | 2408 | coding    | PF08947 |
| MSTRG. 1972. 10 | 1536 | noncoding | —       |
| MSTRG. 1972. 9  | 6594 | noncoding | —       |
| MSTRG. 1972. 11 | 1859 | coding    | PF08947 |
| MSTRG. 1970. 1  | 222  | noncoding | —       |
| MSTRG. 1989. 1  | 745  | noncoding | —       |
| MSTRG. 1989. 2  | 500  | noncoding | —       |
| MSTRG. 1990. 1  | 558  | noncoding | —       |
| MSTRG. 2059. 1  | 629  | coding    | PF00078 |
| MSTRG. 2062. 3  | 1854 | coding    | PF12845 |
| MSTRG. 2062. 4  | 5070 | coding    | PF12845 |
| MSTRG. 2062. 6  | 4410 | coding    | PF12845 |
| MSTRG. 2062. 5  | 2511 | coding    | PF12845 |
| MSTRG. 2063. 1  | 3876 | noncoding | —       |
| MSTRG. 2060. 1  | 400  | noncoding | —       |
| MSTRG. 2068. 4  | 1525 | coding    | PF00076 |
| MSTRG. 2068. 5  | 1604 | coding    | PF00076 |
| MSTRG. 2068. 6  | 1471 | coding    | PF00076 |
| MSTRG. 2068. 7  | 1762 | coding    | PF00076 |
| MSTRG. 2068. 9  | 1753 | coding    | PF00076 |
| MSTRG. 2068. 8  | 4016 | coding    | PF00076 |
| MSTRG. 2070. 1  | 368  | noncoding | —       |
| MSTRG. 2071. 1  | 2108 | noncoding | —       |
| MSTRG. 2067. 1  | 243  | noncoding | —       |
| MSTRG. 2067. 2  | 325  | coding    | PF01283 |
| MSTRG. 2066. 1  | 647  | noncoding | —       |
| MSTRG. 2072. 2  | 2205 | coding    | PF00040 |
| MSTRG. 2079. 1  | 3616 | noncoding | —       |
| MSTRG. 2079. 2  | 706  | noncoding | —       |
| MSTRG. 2085. 1  | 1067 | noncoding | —       |
| MSTRG. 2085. 2  | 2137 | noncoding | —       |
| MSTRG. 2086. 1  | 311  | noncoding | —       |
| MSTRG. 2088. 6  | 2335 | coding    | PF12906 |
| MSTRG. 2088. 4  | 3021 | coding    | PF12906 |
| MSTRG. 2088. 5  | 2412 | coding    | PF12906 |
| MSTRG. 2088. 8  | 3585 | coding    | PF12906 |
| MSTRG. 2083. 1  | 7792 | noncoding | —       |
| MSTRG. 2095. 1  | 5285 | coding    | PF00078 |
| MSTRG. 2095. 2  | 1006 | noncoding | —       |
| MSTRG. 2098. 1  | 2846 | noncoding | —       |
| MSTRG. 2097. 6  | 8174 | coding    | PF00439 |
| MSTRG. 2097. 7  | 5707 | noncoding | —       |
| MSTRG. 2097. 8  | 6896 | coding    | PF01429 |
| MSTRG. 2110. 8  | 4183 | noncoding | —       |
| MSTRG. 2110. 1  | 3808 | noncoding | —       |
| MSTRG. 2110. 5  | 3805 | noncoding | —       |
| MSTRG. 2111. 1  | 1872 | noncoding | —       |
| MSTRG. 2110. 9  | 1546 | noncoding | —       |
| MSTRG. 2112. 1  | 751  | noncoding | —       |
| MSTRG. 2113. 1  | 1749 | noncoding | —       |
| MSTRG. 2114. 1  | 2395 | noncoding | —       |
| MSTRG. 2116. 1  | 1198 | coding    | PF02994 |
| MSTRG. 2114. 2  | 2385 | noncoding | —       |

|                 |       |           |         |
|-----------------|-------|-----------|---------|
| MSTRG. 2108. 1  | 570   | noncoding | -       |
| MSTRG. 2119. 3  | 4434  | coding    | PF16901 |
| MSTRG. 2118. 1  | 242   | noncoding | -       |
| MSTRG. 2126. 1  | 406   | noncoding | -       |
| MSTRG. 2148. 1  | 1296  | noncoding | -       |
| MSTRG. 2152. 1  | 910   | noncoding | -       |
| MSTRG. 2154. 1  | 2752  | noncoding | -       |
| MSTRG. 2153. 6  | 5155  | coding    | PF15062 |
| MSTRG. 2153. 3  | 1857  | coding    | PF15062 |
| MSTRG. 2153. 5  | 1836  | coding    | PF15062 |
| MSTRG. 2153. 4  | 3044  | coding    | PF15062 |
| MSTRG. 2153. 7  | 2620  | coding    | PF03467 |
| MSTRG. 2155. 1  | 4273  | coding    | PF01846 |
| MSTRG. 2155. 2  | 4613  | coding    | PF01846 |
| MSTRG. 2155. 3  | 3697  | coding    | PF01846 |
| MSTRG. 2155. 4  | 4106  | coding    | PF01846 |
| MSTRG. 2155. 7  | 729   | noncoding | -       |
| MSTRG. 2155. 8  | 1625  | noncoding | -       |
| MSTRG. 2155. 9  | 1982  | noncoding | -       |
| MSTRG. 2144. 1  | 958   | noncoding | -       |
| MSTRG. 2145. 1  | 998   | noncoding | -       |
| MSTRG. 2146. 1  | 11452 | noncoding | -       |
| MSTRG. 2146. 2  | 20377 | noncoding | -       |
| MSTRG. 2175. 1  | 18820 | noncoding | -       |
| MSTRG. 2175. 2  | 4765  | noncoding | -       |
| MSTRG. 2177. 2  | 8891  | coding    | PF12231 |
| MSTRG. 2177. 1  | 9062  | coding    | PF12231 |
| MSTRG. 2177. 6  | 11614 | coding    | PF12231 |
| MSTRG. 2177. 4  | 10896 | coding    | PF12231 |
| MSTRG. 2177. 7  | 15564 | coding    | PF12231 |
| MSTRG. 2177. 8  | 8421  | coding    | PF12231 |
| MSTRG. 2177. 10 | 11306 | coding    | PF12231 |
| MSTRG. 2177. 12 | 9858  | noncoding | -       |
| MSTRG. 2177. 11 | 10874 | coding    | PF12231 |
| MSTRG. 2157. 1  | 1520  | coding    | PF07292 |
| MSTRG. 2166. 1  | 752   | noncoding | -       |
| MSTRG. 2167. 1  | 385   | noncoding | -       |
| MSTRG. 2179. 2  | 6115  | coding    | PF00225 |
| MSTRG. 2179. 3  | 2781  | coding    | PF00225 |
| MSTRG. 2179. 4  | 5771  | noncoding | -       |
| MSTRG. 2200. 2  | 6842  | noncoding | -       |
| MSTRG. 2200. 3  | 6484  | noncoding | -       |
| MSTRG. 2200. 5  | 6527  | noncoding | -       |
| MSTRG. 2201. 1  | 2333  | noncoding | -       |
| MSTRG. 2202. 1  | 1955  | noncoding | -       |
| MSTRG. 2203. 1  | 3579  | noncoding | -       |
| MSTRG. 2210. 3  | 6201  | noncoding | -       |
| MSTRG. 2211. 1  | 4060  | noncoding | -       |
| MSTRG. 2210. 4  | 8054  | noncoding | -       |
| MSTRG. 2212. 1  | 6762  | noncoding | -       |
| MSTRG. 2213. 3  | 3989  | noncoding | -       |
| MSTRG. 2196. 1  | 467   | noncoding | -       |
| MSTRG. 2219. 1  | 9913  | noncoding | -       |
| MSTRG. 2220. 2  | 6033  | noncoding | -       |

|                |       |           |         |
|----------------|-------|-----------|---------|
| MSTRG. 2221. 1 | 17829 | noncoding | –       |
| MSTRG. 2221. 2 | 981   | noncoding | –       |
| MSTRG. 2222. 1 | 12317 | noncoding | –       |
| MSTRG. 2222. 2 | 6978  | noncoding | –       |
| MSTRG. 2220. 3 | 7010  | noncoding | –       |
| MSTRG. 2220. 4 | 4190  | noncoding | –       |
| MSTRG. 2223. 3 | 787   | noncoding | –       |
| MSTRG. 2223. 4 | 9652  | coding    | PF00078 |
| MSTRG. 2223. 5 | 6259  | noncoding | –       |
| MSTRG. 2223. 6 | 5490  | noncoding | –       |
| MSTRG. 2224. 1 | 2448  | noncoding | –       |
| MSTRG. 2225. 1 | 1188  | noncoding | –       |
| MSTRG. 2230. 1 | 774   | noncoding | –       |
| MSTRG. 2240. 1 | 216   | noncoding | –       |
| MSTRG. 2241. 1 | 884   | noncoding | –       |
| MSTRG. 2248. 2 | 1849  | coding    | PF00651 |
| MSTRG. 2248. 4 | 3828  | coding    | PF00651 |
| MSTRG. 2248. 6 | 1641  | coding    | PF00651 |
| MSTRG. 2250. 1 | 885   | noncoding | –       |
| MSTRG. 2252. 1 | 2612  | noncoding | –       |
| MSTRG. 2257. 2 | 2372  | coding    | PF00001 |
| MSTRG. 2257. 3 | 2058  | coding    | PF00001 |
| MSTRG. 2265. 1 | 6939  | noncoding | –       |
| MSTRG. 2265. 2 | 3522  | noncoding | –       |
| MSTRG. 2265. 3 | 9834  | noncoding | –       |
| MSTRG. 2265. 4 | 2553  | noncoding | –       |
| MSTRG. 2265. 6 | 3865  | noncoding | –       |
| MSTRG. 2265. 5 | 5727  | noncoding | –       |
| MSTRG. 2262. 2 | 2777  | coding    | PF00789 |
| MSTRG. 2268. 4 | 3906  | noncoding | –       |
| MSTRG. 2268. 3 | 4306  | noncoding | –       |
| MSTRG. 2268. 5 | 4439  | noncoding | –       |
| MSTRG. 2269. 1 | 2404  | noncoding | –       |
| MSTRG. 2273. 1 | 706   | noncoding | –       |
| MSTRG. 2278. 1 | 1907  | noncoding | –       |
| MSTRG. 2280. 1 | 6410  | coding    | PF13890 |
| MSTRG. 2281. 1 | 2766  | noncoding | –       |
| MSTRG. 2282. 1 | 558   | noncoding | –       |
| MSTRG. 2283. 1 | 2458  | noncoding | –       |
| MSTRG. 2284. 1 | 3430  | noncoding | –       |
| MSTRG. 2270. 4 | 5619  | noncoding | –       |
| MSTRG. 2270. 5 | 6037  | noncoding | –       |
| MSTRG. 2288. 1 | 7913  | coding    | PF15024 |
| MSTRG. 2288. 3 | 8256  | coding    | PF15024 |
| MSTRG. 2289. 1 | 7857  | noncoding | –       |
| MSTRG. 2285. 1 | 405   | noncoding | –       |
| MSTRG. 2311. 1 | 453   | noncoding | –       |
| MSTRG. 2350. 1 | 1445  | coding    | PF00002 |
| MSTRG. 2352. 2 | 3569  | noncoding | –       |
| MSTRG. 2352. 3 | 2279  | noncoding | –       |
| MSTRG. 2352. 4 | 2186  | noncoding | –       |
| MSTRG. 2355. 1 | 418   | noncoding | –       |
| MSTRG. 2361. 1 | 5682  | coding    | PF00102 |
| MSTRG. 2361. 2 | 6918  | coding    | PF00102 |



|                 |       |           |         |
|-----------------|-------|-----------|---------|
| MSTRG. 2361. 4  | 7441  | coding    | PF00102 |
| MSTRG. 2361. 5  | 10589 | coding    | PF00102 |
| MSTRG. 2361. 3  | 10368 | coding    | PF00102 |
| MSTRG. 2362. 1  | 1616  | noncoding | —       |
| MSTRG. 2364. 1  | 6197  | coding    | PF09379 |
| MSTRG. 2364. 4  | 8154  | coding    | PF09380 |
| MSTRG. 2364. 6  | 8973  | coding    | PF09380 |
| MSTRG. 2365. 1  | 2277  | noncoding | —       |
| MSTRG. 2364. 7  | 8748  | coding    | PF09380 |
| MSTRG. 2364. 8  | 12542 | noncoding | —       |
| MSTRG. 2364. 9  | 1331  | noncoding | —       |
| MSTRG. 2366. 1  | 3360  | noncoding | —       |
| MSTRG. 2364. 11 | 7645  | noncoding | —       |
| MSTRG. 2371. 1  | 6802  | noncoding | —       |
| MSTRG. 2381. 1  | 7775  | noncoding | —       |
| MSTRG. 2381. 10 | 7089  | noncoding | —       |
| MSTRG. 2381. 7  | 6821  | noncoding | —       |
| MSTRG. 2381. 4  | 7506  | noncoding | —       |
| MSTRG. 2381. 6  | 7774  | noncoding | —       |
| MSTRG. 2381. 5  | 7666  | noncoding | —       |
| MSTRG. 2381. 2  | 7886  | noncoding | —       |
| MSTRG. 2381. 3  | 8101  | noncoding | —       |
| MSTRG. 2381. 9  | 8389  | noncoding | —       |
| MSTRG. 2381. 13 | 6806  | noncoding | —       |
| MSTRG. 2381. 12 | 7775  | noncoding | —       |
| MSTRG. 2381. 15 | 7408  | noncoding | —       |
| MSTRG. 2381. 17 | 7402  | noncoding | —       |
| MSTRG. 2381. 16 | 11949 | noncoding | —       |
| MSTRG. 2381. 14 | 8418  | noncoding | —       |
| MSTRG. 2381. 18 | 8325  | noncoding | —       |
| MSTRG. 2381. 19 | 3846  | noncoding | —       |
| MSTRG. 2387. 1  | 464   | noncoding | —       |
| MSTRG. 2385. 1  | 444   | noncoding | —       |
| MSTRG. 2391. 1  | 209   | noncoding | —       |
| MSTRG. 2392. 1  | 275   | noncoding | —       |
| MSTRG. 2398. 5  | 823   | noncoding | —       |
| MSTRG. 2412. 1  | 4321  | noncoding | —       |
| MSTRG. 2412. 2  | 4315  | noncoding | —       |
| MSTRG. 2412. 3  | 7458  | noncoding | —       |
| MSTRG. 2415. 1  | 5963  | noncoding | —       |
| MSTRG. 2412. 4  | 6076  | noncoding | —       |
| MSTRG. 2417. 1  | 2620  | noncoding | —       |
| MSTRG. 2417. 2  | 2528  | noncoding | —       |
| MSTRG. 2418. 1  | 10784 | noncoding | —       |
| MSTRG. 2419. 2  | 1726  | coding    | PF04960 |
| MSTRG. 2419. 5  | 1120  | noncoding | —       |
| MSTRG. 2419. 6  | 1767  | coding    | PF04960 |
| MSTRG. 2419. 4  | 2081  | coding    | PF04960 |
| MSTRG. 2403. 1  | 737   | noncoding | —       |
| MSTRG. 2407. 1  | 737   | noncoding | —       |
| MSTRG. 2426. 1  | 875   | noncoding | —       |
| MSTRG. 2431. 1  | 215   | noncoding | —       |
| MSTRG. 2433. 1  | 278   | noncoding | —       |
| MSTRG. 2438. 1  | 871   | noncoding | —       |

|                 |       |           |         |
|-----------------|-------|-----------|---------|
| MSTRG. 2439. 4  | 1377  | coding    | PF03028 |
| MSTRG. 2435. 3  | 1312  | coding    | PF00069 |
| MSTRG. 2446. 3  | 2700  | noncoding | –       |
| MSTRG. 2447. 1  | 3737  | noncoding | –       |
| MSTRG. 2475. 4  | 2264  | noncoding | –       |
| MSTRG. 2475. 5  | 1469  | coding    | PF00118 |
| MSTRG. 2476. 1  | 873   | coding    | PF00166 |
| MSTRG. 2476. 2  | 527   | coding    | PF00166 |
| MSTRG. 2477. 1  | 561   | noncoding | –       |
| MSTRG. 2479. 4  | 2975  | coding    | PF15250 |
| MSTRG. 2480. 1  | 7270  | noncoding | –       |
| MSTRG. 2479. 5  | 2012  | coding    | PF00076 |
| MSTRG. 2479. 6  | 1967  | coding    | PF00076 |
| MSTRG. 2479. 7  | 1990  | coding    | PF00076 |
| MSTRG. 2479. 8  | 1738  | coding    | PF00076 |
| MSTRG. 2479. 9  | 2134  | coding    | PF00076 |
| MSTRG. 2479. 10 | 2669  | coding    | PF00076 |
| MSTRG. 2479. 13 | 1516  | coding    | PF00076 |
| MSTRG. 2479. 14 | 2826  | coding    | PF00076 |
| MSTRG. 2479. 15 | 2538  | coding    | PF00076 |
| MSTRG. 2479. 16 | 1149  | coding    | PF00076 |
| MSTRG. 2479. 17 | 2256  | coding    | PF00076 |
| MSTRG. 2485. 2  | 4145  | coding    | PF00388 |
| MSTRG. 2485. 3  | 4180  | coding    | PF00388 |
| MSTRG. 2460. 1  | 2196  | coding    | PF16534 |
| MSTRG. 2464. 2  | 3126  | coding    | PF07837 |
| MSTRG. 2468. 1  | 4664  | coding    | PF13621 |
| MSTRG. 2489. 3  | 2551  | noncoding | –       |
| MSTRG. 2492. 2  | 4224  | coding    | PF00941 |
| MSTRG. 2493. 1  | 3688  | coding    | PF02738 |
| MSTRG. 2498. 2  | 6338  | noncoding | –       |
| MSTRG. 2509. 3  | 1601  | coding    | PF00069 |
| MSTRG. 2509. 5  | 1585  | coding    | PF00069 |
| MSTRG. 2509. 4  | 1993  | coding    | PF00069 |
| MSTRG. 2510. 1  | 2183  | noncoding | –       |
| MSTRG. 2510. 2  | 1539  | noncoding | –       |
| MSTRG. 2513. 3  | 4638  | noncoding | –       |
| MSTRG. 2513. 5  | 6780  | noncoding | –       |
| MSTRG. 2514. 3  | 1158  | noncoding | –       |
| MSTRG. 2515. 1  | 4414  | noncoding | –       |
| MSTRG. 2499. 1  | 232   | noncoding | –       |
| MSTRG. 2508. 1  | 1821  | noncoding | –       |
| MSTRG. 2517. 2  | 1997  | coding    | PF15729 |
| MSTRG. 2517. 3  | 1799  | coding    | PF15729 |
| MSTRG. 2519. 3  | 6290  | coding    | PF02204 |
| MSTRG. 2519. 4  | 6161  | coding    | PF02204 |
| MSTRG. 2529. 1  | 10322 | noncoding | –       |
| MSTRG. 2529. 2  | 2077  | noncoding | –       |
| MSTRG. 2530. 1  | 1627  | noncoding | –       |
| MSTRG. 2566. 1  | 1724  | noncoding | –       |
| MSTRG. 2567. 1  | 2063  | noncoding | –       |
| MSTRG. 2568. 2  | 2112  | coding    | PF08154 |
| MSTRG. 2569. 1  | 3309  | coding    | PF15299 |
| MSTRG. 2569. 2  | 3411  | coding    | PF15299 |

|                 |       |           |         |
|-----------------|-------|-----------|---------|
| MSTRG. 2569. 4  | 4865  | coding    | PF15299 |
| MSTRG. 2569. 6  | 1160  | coding    | PF15299 |
| MSTRG. 2569. 5  | 2831  | coding    | PF15299 |
| MSTRG. 2572. 1  | 1443  | noncoding | –       |
| MSTRG. 2569. 7  | 17256 | coding    | PF16057 |
| MSTRG. 2569. 8  | 15390 | coding    | PF16057 |
| MSTRG. 2569. 9  | 8461  | coding    | PF16057 |
| MSTRG. 2575. 1  | 1896  | noncoding | –       |
| MSTRG. 2576. 4  | 292   | noncoding | –       |
| MSTRG. 2576. 3  | 13110 | coding    | PF00018 |
| MSTRG. 2577. 1  | 2095  | noncoding | –       |
| MSTRG. 2576. 5  | 5395  | coding    | PF07815 |
| MSTRG. 2576. 6  | 8095  | noncoding | –       |
| MSTRG. 2576. 7  | 14455 | coding    | PF00018 |
| MSTRG. 2579. 2  | 7772  | noncoding | –       |
| MSTRG. 2579. 3  | 2385  | noncoding | –       |
| MSTRG. 2541. 2  | 873   | coding    | PF12053 |
| MSTRG. 2542. 1  | 370   | noncoding | –       |
| MSTRG. 2543. 1  | 419   | noncoding | –       |
| MSTRG. 2544. 1  | 1911  | noncoding | –       |
| MSTRG. 2545. 1  | 2925  | noncoding | –       |
| MSTRG. 2536. 1  | 447   | noncoding | –       |
| MSTRG. 2540. 1  | 649   | noncoding | –       |
| MSTRG. 2561. 4  | 870   | coding    | PF00736 |
| MSTRG. 2564. 3  | 2567  | noncoding | –       |
| MSTRG. 2582. 2  | 7056  | noncoding | –       |
| MSTRG. 2582. 3  | 6873  | noncoding | –       |
| MSTRG. 2588. 1  | 1648  | noncoding | –       |
| MSTRG. 2589. 2  | 5827  | noncoding | –       |
| MSTRG. 2589. 3  | 1849  | noncoding | –       |
| MSTRG. 2589. 4  | 1265  | noncoding | –       |
| MSTRG. 2590. 2  | 1972  | coding    | PF10294 |
| MSTRG. 2590. 1  | 1934  | coding    | PF10294 |
| MSTRG. 2590. 3  | 2050  | coding    | PF10294 |
| MSTRG. 2591. 5  | 5570  | noncoding | –       |
| MSTRG. 2591. 6  | 462   | noncoding | –       |
| MSTRG. 2594. 1  | 1834  | noncoding | –       |
| MSTRG. 2596. 4  | 9241  | coding    | PF00118 |
| MSTRG. 2596. 3  | 9312  | coding    | PF00118 |
| MSTRG. 2597. 2  | 910   | noncoding | –       |
| MSTRG. 2597. 1  | 797   | noncoding | –       |
| MSTRG. 2598. 1  | 233   | noncoding | –       |
| MSTRG. 2602. 1  | 677   | noncoding | –       |
| MSTRG. 2602. 2  | 505   | noncoding | –       |
| MSTRG. 2602. 3  | 502   | noncoding | –       |
| MSTRG. 2602. 10 | 5075  | noncoding | –       |
| MSTRG. 2602. 11 | 5067  | noncoding | –       |
| MSTRG. 2602. 12 | 1362  | noncoding | –       |
| MSTRG. 2601. 1  | 420   | noncoding | –       |
| MSTRG. 2601. 2  | 324   | noncoding | –       |
| MSTRG. 2605. 3  | 5675  | noncoding | –       |
| MSTRG. 2605. 4  | 5372  | noncoding | –       |
| MSTRG. 2605. 5  | 11145 | coding    | PF15778 |
| MSTRG. 2605. 6  | 5565  | noncoding | –       |

|                 |       |           |         |
|-----------------|-------|-----------|---------|
| MSTRG. 2605. 7  | 13368 | coding    | PF15778 |
| MSTRG. 2605. 8  | 4417  | noncoding | –       |
| MSTRG. 2605. 10 | 6774  | noncoding | –       |
| MSTRG. 2605. 9  | 6599  | noncoding | –       |
| MSTRG. 2605. 11 | 3327  | noncoding | –       |
| MSTRG. 2609. 7  | 4551  | coding    | PF15275 |
| MSTRG. 2609. 8  | 4377  | coding    | PF15275 |
| MSTRG. 2609. 9  | 4516  | coding    | PF15275 |
| MSTRG. 2610. 2  | 6722  | coding    | PF15275 |
| MSTRG. 2611. 1  | 4492  | noncoding | –       |
| MSTRG. 2607. 3  | 1595  | coding    | PF05147 |
| MSTRG. 2682. 1  | 4907  | coding    | PF01359 |
| MSTRG. 2614. 1  | 276   | noncoding | –       |
| MSTRG. 2632. 1  | 1097  | noncoding | –       |
| MSTRG. 2633. 1  | 513   | noncoding | –       |
| MSTRG. 2634. 3  | 1206  | noncoding | –       |
| MSTRG. 2635. 1  | 3104  | noncoding | –       |
| MSTRG. 2636. 1  | 1735  | noncoding | –       |
| MSTRG. 2638. 1  | 1017  | noncoding | –       |
| MSTRG. 2639. 1  | 6591  | noncoding | –       |
| MSTRG. 2640. 1  | 5197  | noncoding | –       |
| MSTRG. 2641. 1  | 1839  | noncoding | –       |
| MSTRG. 2642. 1  | 508   | noncoding | –       |
| MSTRG. 2645. 1  | 5407  | noncoding | –       |
| MSTRG. 2645. 2  | 8683  | noncoding | –       |
| MSTRG. 2645. 3  | 868   | noncoding | –       |
| MSTRG. 2647. 1  | 593   | noncoding | –       |
| MSTRG. 2647. 2  | 879   | noncoding | –       |
| MSTRG. 2649. 1  | 952   | noncoding | –       |
| MSTRG. 2668. 3  | 10210 | coding    | PF10409 |
| MSTRG. 2668. 4  | 10189 | coding    | PF10409 |
| MSTRG. 2668. 5  | 10313 | coding    | PF10409 |
| MSTRG. 2668. 6  | 8973  | coding    | PF08416 |
| MSTRG. 2668. 7  | 6121  | coding    | PF08416 |
| MSTRG. 2706. 2  | 1067  | noncoding | –       |
| MSTRG. 2706. 3  | 1391  | noncoding | –       |
| MSTRG. 2711. 3  | 580   | noncoding | –       |
| MSTRG. 2711. 4  | 1481  | coding    | PF00168 |
| MSTRG. 2714. 3  | 1566  | noncoding | –       |
| MSTRG. 2714. 4  | 3661  | coding    | PF05773 |
| MSTRG. 2715. 1  | 4526  | coding    | PF00069 |
| MSTRG. 2715. 4  | 4320  | coding    | PF00069 |
| MSTRG. 2715. 5  | 3991  | coding    | PF00069 |
| MSTRG. 2717. 2  | 1412  | coding    | PF00110 |
| MSTRG. 2720. 1  | 1287  | noncoding | –       |
| MSTRG. 2721. 2  | 1019  | coding    | PF00178 |
| MSTRG. 2721. 3  | 878   | coding    | PF00178 |
| MSTRG. 2724. 3  | 2268  | noncoding | –       |
| MSTRG. 2740. 1  | 2897  | noncoding | –       |
| MSTRG. 2742. 1  | 1549  | coding    | PF00069 |
| MSTRG. 2742. 4  | 1515  | coding    | PF00069 |
| MSTRG. 2742. 5  | 1425  | coding    | PF00069 |
| MSTRG. 2730. 2  | 2039  | coding    | PF03953 |
| MSTRG. 2732. 1  | 2793  | coding    | PF00226 |

|                 |       |           |         |
|-----------------|-------|-----------|---------|
| MSTRG. 2732. 2  | 1898  | coding    | PF00226 |
| MSTRG. 2732. 5  | 1204  | coding    | PF00226 |
| MSTRG. 2743. 1  | 3290  | coding    | PF16650 |
| MSTRG. 2744. 1  | 798   | noncoding | –       |
| MSTRG. 2747. 4  | 1568  | noncoding | –       |
| MSTRG. 2750. 1  | 589   | coding    | PF07679 |
| MSTRG. 2750. 2  | 576   | coding    | PF07679 |
| MSTRG. 2750. 3  | 630   | coding    | PF07679 |
| MSTRG. 2749. 5  | 7260  | coding    | PF07679 |
| MSTRG. 2757. 1  | 386   | noncoding | –       |
| MSTRG. 2761. 1  | 256   | noncoding | –       |
| MSTRG. 2762. 1  | 435   | noncoding | –       |
| MSTRG. 2766. 2  | 2032  | coding    | PF03484 |
| MSTRG. 2770. 1  | 315   | noncoding | –       |
| MSTRG. 2771. 3  | 819   | coding    | PF01127 |
| MSTRG. 2771. 2  | 759   | noncoding | –       |
| MSTRG. 2772. 1  | 2986  | noncoding | –       |
| MSTRG. 2774. 2  | 2222  | coding    | PF00079 |
| MSTRG. 2774. 3  | 2022  | coding    | PF00079 |
| MSTRG. 2775. 1  | 2961  | noncoding | –       |
| MSTRG. 2777. 3  | 3112  | coding    | PF00888 |
| MSTRG. 2778. 1  | 413   | noncoding | –       |
| MSTRG. 2778. 2  | 341   | noncoding | –       |
| MSTRG. 2804. 3  | 1492  | noncoding | –       |
| MSTRG. 2806. 5  | 8758  | noncoding | –       |
| MSTRG. 2806. 6  | 6113  | noncoding | –       |
| MSTRG. 2806. 7  | 11784 | noncoding | –       |
| MSTRG. 2806. 8  | 370   | noncoding | –       |
| MSTRG. 2807. 1  | 7118  | noncoding | –       |
| MSTRG. 2808. 1  | 1546  | noncoding | –       |
| MSTRG. 2809. 1  | 8207  | noncoding | –       |
| MSTRG. 2810. 2  | 7254  | noncoding | –       |
| MSTRG. 2811. 8  | 4207  | coding    | PF05644 |
| MSTRG. 2811. 10 | 2314  | coding    | PF05644 |
| MSTRG. 2788. 4  | 8272  | noncoding | –       |
| MSTRG. 2788. 5  | 9350  | noncoding | –       |
| MSTRG. 2788. 6  | 2494  | noncoding | –       |
| MSTRG. 2788. 7  | 2421  | noncoding | –       |
| MSTRG. 2793. 3  | 1619  | coding    | PF00400 |
| MSTRG. 2798. 2  | 2979  | noncoding | –       |
| MSTRG. 2822. 10 | 5894  | coding    | PF00632 |
| MSTRG. 2822. 6  | 6362  | coding    | PF00632 |
| MSTRG. 2829. 1  | 3146  | noncoding | –       |
| MSTRG. 2830. 1  | 2173  | noncoding | –       |
| MSTRG. 2799. 1  | 2962  | coding    | PF03172 |
| MSTRG. 2800. 2  | 2803  | coding    | PF03172 |
| MSTRG. 2817. 1  | 4693  | noncoding | –       |
| MSTRG. 2819. 1  | 627   | noncoding | –       |
| MSTRG. 2819. 2  | 450   | noncoding | –       |
| MSTRG. 2819. 3  | 573   | noncoding | –       |
| MSTRG. 2819. 4  | 1800  | noncoding | –       |
| MSTRG. 2820. 2  | 3233  | noncoding | –       |
| MSTRG. 2820. 3  | 3960  | coding    | PF08569 |
| MSTRG. 2816. 4  | 5290  | noncoding | –       |

|                |       |           |         |
|----------------|-------|-----------|---------|
| MSTRG. 2816. 3 | 5352  | noncoding | –       |
| MSTRG. 2816. 1 | 5252  | noncoding | –       |
| MSTRG. 2816. 5 | 4657  | noncoding | –       |
| MSTRG. 2814. 1 | 754   | noncoding | –       |
| MSTRG. 2821. 2 | 3094  | noncoding | –       |
| MSTRG. 2821. 3 | 3347  | noncoding | –       |
| MSTRG. 2833. 3 | 4202  | noncoding | –       |
| MSTRG. 2833. 4 | 2512  | noncoding | –       |
| MSTRG. 2833. 5 | 1843  | noncoding | –       |
| MSTRG. 2836. 2 | 2637  | coding    | PF00076 |
| MSTRG. 2837. 1 | 12154 | noncoding | –       |
| MSTRG. 2837. 2 | 4995  | noncoding | –       |
| MSTRG. 2843. 2 | 1190  | noncoding | –       |
| MSTRG. 2840. 3 | 2248  | noncoding | –       |
| MSTRG. 2848. 2 | 3914  | coding    | PF00773 |
| MSTRG. 2848. 3 | 3300  | coding    | PF00773 |
| MSTRG. 2848. 4 | 1434  | noncoding | –       |
| MSTRG. 2848. 6 | 4513  | coding    | PF00773 |
| MSTRG. 2848. 7 | 257   | noncoding | –       |
| MSTRG. 2845. 1 | 969   | noncoding | –       |
| MSTRG. 2845. 2 | 888   | noncoding | –       |
| MSTRG. 2850. 5 | 4449  | coding    | PF01652 |
| MSTRG. 2850. 4 | 4335  | coding    | PF01652 |
| MSTRG. 2850. 6 | 1901  | noncoding | –       |
| MSTRG. 2850. 7 | 8626  | coding    | PF01652 |
| MSTRG. 2850. 8 | 7773  | coding    | PF01652 |
| MSTRG. 2846. 1 | 1666  | noncoding | –       |
| MSTRG. 2857. 2 | 3734  | coding    | PF16616 |
| MSTRG. 2857. 4 | 2339  | coding    | PF16616 |
| MSTRG. 2852. 4 | 15093 | noncoding | –       |
| MSTRG. 2852. 3 | 15127 | noncoding | –       |
| MSTRG. 2858. 2 | 3215  | coding    | PF00406 |
| MSTRG. 2859. 1 | 352   | noncoding | –       |
| MSTRG. 2865. 3 | 2754  | coding    | PF01485 |
| MSTRG. 2866. 8 | 1980  | coding    | PF15427 |
| MSTRG. 2871. 1 | 3691  | coding    | PF12265 |
| MSTRG. 2873. 1 | 5655  | coding    | PF01951 |
| MSTRG. 2870. 1 | 2085  | coding    | PF00651 |
| MSTRG. 2879. 1 | 1530  | coding    | PF00069 |
| MSTRG. 2879. 3 | 1148  | coding    | PF00069 |
| MSTRG. 2884. 3 | 2631  | coding    | PF00850 |
| MSTRG. 2889. 3 | 1395  | coding    | PF10639 |
| MSTRG. 2889. 4 | 1127  | coding    | PF10639 |
| MSTRG. 2894. 2 | 322   | noncoding | –       |
| MSTRG. 2897. 1 | 6919  | coding    | PF03953 |
| MSTRG. 2898. 2 | 3611  | coding    | PF07500 |
| MSTRG. 2898. 1 | 3814  | coding    | PF07500 |
| MSTRG. 2899. 1 | 1920  | noncoding | –       |
| MSTRG. 2899. 3 | 1161  | noncoding | –       |
| MSTRG. 2899. 2 | 1098  | noncoding | –       |
| MSTRG. 2898. 4 | 1688  | coding    | PF07744 |
| MSTRG. 2900. 4 | 1540  | noncoding | –       |
| MSTRG. 2900. 5 | 778   | noncoding | –       |
| MSTRG. 2906. 4 | 5090  | noncoding | –       |

|                |       |           |         |
|----------------|-------|-----------|---------|
| MSTRG. 2906. 5 | 3363  | noncoding | -       |
| MSTRG. 2907. 3 | 2392  | coding    | PF03348 |
| MSTRG. 2909. 1 | 1347  | coding    | PF00061 |
| MSTRG. 2909. 2 | 1005  | coding    | PF00061 |
| MSTRG. 2910. 1 | 3603  | noncoding | -       |
| MSTRG. 2910. 4 | 2015  | noncoding | -       |
| MSTRG. 2912. 2 | 2245  | coding    | PF01034 |
| MSTRG. 2913. 1 | 962   | noncoding | -       |
| MSTRG. 2914. 1 | 2420  | coding    | PF03821 |
| MSTRG. 2914. 2 | 2202  | coding    | PF03821 |
| MSTRG. 2921. 1 | 889   | noncoding | -       |
| MSTRG. 2922. 1 | 793   | noncoding | -       |
| MSTRG. 2922. 2 | 688   | noncoding | -       |
| MSTRG. 2920. 1 | 256   | noncoding | -       |
| MSTRG. 2924. 2 | 5218  | coding    | PF00102 |
| MSTRG. 2924. 3 | 5295  | coding    | PF00102 |
| MSTRG. 2927. 3 | 13020 | noncoding | -       |
| MSTRG. 2932. 2 | 5404  | coding    | PF05902 |
| MSTRG. 2932. 6 | 2985  | coding    | PF05902 |
| MSTRG. 2929. 1 | 781   | coding    | PF00001 |
| MSTRG. 2935. 3 | 2542  | coding    | PF01342 |
| MSTRG. 2943. 3 | 1010  | noncoding | -       |
| MSTRG. 2943. 4 | 1481  | coding    | PF00076 |
| MSTRG. 2943. 5 | 1189  | coding    | PF00076 |
| MSTRG. 2943. 7 | 1135  | noncoding | -       |
| MSTRG. 2943. 6 | 1022  | coding    | PF00076 |
| MSTRG. 2950. 1 | 2659  | noncoding | -       |
| MSTRG. 2950. 2 | 2281  | noncoding | -       |
| MSTRG. 2950. 3 | 3184  | noncoding | -       |
| MSTRG. 2951. 1 | 903   | noncoding | -       |
| MSTRG. 2956. 4 | 3995  | noncoding | -       |
| MSTRG. 2956. 5 | 3839  | noncoding | -       |
| MSTRG. 2956. 6 | 6402  | noncoding | -       |
| MSTRG. 2956. 7 | 5042  | noncoding | -       |
| MSTRG. 2957. 1 | 4411  | coding    | PF01359 |
| MSTRG. 2948. 3 | 5344  | noncoding | -       |
| MSTRG. 2960. 1 | 1130  | noncoding | -       |
| MSTRG. 2968. 1 | 3035  | coding    | PF16046 |
| MSTRG. 2968. 2 | 3213  | coding    | PF16046 |
| MSTRG. 2968. 3 | 3149  | coding    | PF16046 |
| MSTRG. 2973. 1 | 669   | coding    | PF05283 |
| MSTRG. 2978. 3 | 2669  | noncoding | -       |
| MSTRG. 2978. 1 | 3890  | noncoding | -       |
| MSTRG. 2978. 2 | 2610  | noncoding | -       |
| MSTRG. 2979. 1 | 440   | noncoding | -       |
| MSTRG. 2980. 1 | 2458  | noncoding | -       |
| MSTRG. 2983. 1 | 2242  | noncoding | -       |
| MSTRG. 2995. 1 | 1344  | noncoding | -       |
| MSTRG. 2996. 3 | 3132  | coding    | PF01255 |
| MSTRG. 2996. 4 | 3075  | coding    | PF01255 |
| MSTRG. 3004. 4 | 1414  | coding    | PF08059 |
| MSTRG. 3004. 6 | 1864  | coding    | PF08059 |
| MSTRG. 3004. 7 | 1650  | coding    | PF08059 |
| MSTRG. 3001. 1 | 1820  | noncoding | -       |

|                 |       |           |         |
|-----------------|-------|-----------|---------|
| MSTRG. 3012. 4  | 1386  | coding    | PF03006 |
| MSTRG. 3012. 5  | 1866  | coding    | PF03006 |
| MSTRG. 3012. 6  | 1421  | coding    | PF03006 |
| MSTRG. 3017. 3  | 3063  | coding    | PF05308 |
| MSTRG. 3017. 7  | 2383  | coding    | PF05308 |
| MSTRG. 3014. 2  | 4018  | noncoding | —       |
| MSTRG. 3021. 2  | 2606  | coding    | PF09726 |
| MSTRG. 3026. 1  | 359   | noncoding | —       |
| MSTRG. 3027. 2  | 4023  | coding    | PF00853 |
| MSTRG. 3027. 3  | 3739  | coding    | PF00853 |
| MSTRG. 3027. 4  | 1394  | coding    | PF00853 |
| MSTRG. 3028. 1  | 4390  | noncoding | —       |
| MSTRG. 3028. 2  | 4148  | noncoding | —       |
| MSTRG. 3028. 3  | 3934  | noncoding | —       |
| MSTRG. 3028. 4  | 4711  | noncoding | —       |
| MSTRG. 3028. 5  | 1527  | noncoding | —       |
| MSTRG. 3029. 1  | 1423  | noncoding | —       |
| MSTRG. 3031. 6  | 3947  | coding    | PF01480 |
| MSTRG. 3031. 10 | 3718  | coding    | PF01480 |
| MSTRG. 3031. 7  | 3895  | coding    | PF01480 |
| MSTRG. 3031. 9  | 3937  | coding    | PF01480 |
| MSTRG. 3036. 2  | 1293  | coding    | PF04847 |
| MSTRG. 3037. 1  | 2104  | noncoding | —       |
| MSTRG. 3037. 5  | 2861  | noncoding | —       |
| MSTRG. 3037. 6  | 1928  | noncoding | —       |
| MSTRG. 3039. 3  | 2263  | noncoding | —       |
| MSTRG. 3043. 1  | 6325  | coding    | PF00076 |
| MSTRG. 3043. 7  | 4368  | noncoding | —       |
| MSTRG. 3043. 4  | 2381  | noncoding | —       |
| MSTRG. 3043. 6  | 2371  | noncoding | —       |
| MSTRG. 3043. 3  | 6157  | noncoding | —       |
| MSTRG. 3043. 10 | 7064  | noncoding | —       |
| MSTRG. 3043. 11 | 7061  | noncoding | —       |
| MSTRG. 3043. 12 | 4314  | noncoding | —       |
| MSTRG. 3043. 9  | 2314  | noncoding | —       |
| MSTRG. 3043. 13 | 2190  | noncoding | —       |
| MSTRG. 3042. 1  | 1012  | noncoding | —       |
| MSTRG. 3050. 1  | 501   | noncoding | —       |
| MSTRG. 3054. 2  | 800   | coding    | PF02230 |
| MSTRG. 3055. 2  | 1939  | coding    | PF06201 |
| MSTRG. 3044. 2  | 4773  | coding    | PF06881 |
| MSTRG. 3056. 2  | 601   | coding    | PF00673 |
| MSTRG. 3059. 1  | 4040  | coding    | PF01412 |
| MSTRG. 3060. 1  | 3533  | coding    | PF07500 |
| MSTRG. 3061. 1  | 1907  | noncoding | —       |
| MSTRG. 3061. 2  | 1471  | noncoding | —       |
| MSTRG. 3064. 6  | 3070  | coding    | PF00076 |
| MSTRG. 3064. 5  | 19187 | coding    | PF00076 |
| MSTRG. 3066. 1  | 1184  | noncoding | —       |
| MSTRG. 3068. 4  | 3438  | coding    | PF01593 |
| MSTRG. 3068. 5  | 3001  | coding    | PF01593 |
| MSTRG. 3068. 3  | 3167  | coding    | PF01593 |
| MSTRG. 3065. 1  | 464   | noncoding | —       |
| MSTRG. 3070. 1  | 2168  | noncoding | —       |



|                 |       |           |         |
|-----------------|-------|-----------|---------|
| MSTRG. 3076. 1  | 7673  | coding    | PF00651 |
| MSTRG. 3085. 2  | 12360 | coding    | PF02210 |
| MSTRG. 3087. 2  | 724   | noncoding | –       |
| MSTRG. 3087. 1  | 691   | noncoding | –       |
| MSTRG. 3093. 1  | 393   | noncoding | –       |
| MSTRG. 3092. 4  | 3274  | coding    | PF02145 |
| MSTRG. 3092. 5  | 1709  | noncoding | –       |
| MSTRG. 3088. 2  | 2463  | coding    | PF00245 |
| MSTRG. 3088. 3  | 2461  | coding    | PF00245 |
| MSTRG. 3113. 1  | 3625  | noncoding | –       |
| MSTRG. 3114. 1  | 6502  | coding    | PF02854 |
| MSTRG. 3115. 1  | 12912 | noncoding | –       |
| MSTRG. 3116. 1  | 17077 | noncoding | –       |
| MSTRG. 3116. 2  | 13185 | noncoding | –       |
| MSTRG. 3114. 2  | 5864  | coding    | PF02854 |
| MSTRG. 3114. 4  | 5713  | coding    | PF02854 |
| MSTRG. 3114. 3  | 5813  | coding    | PF02854 |
| MSTRG. 3114. 5  | 5777  | coding    | PF02854 |
| MSTRG. 3114. 7  | 6662  | coding    | PF02854 |
| MSTRG. 3114. 13 | 5891  | coding    | PF02854 |
| MSTRG. 3114. 8  | 5774  | coding    | PF02854 |
| MSTRG. 3114. 9  | 6872  | coding    | PF02854 |
| MSTRG. 3117. 1  | 3470  | noncoding | –       |
| MSTRG. 3118. 1  | 3973  | noncoding | –       |
| MSTRG. 3114. 14 | 7394  | coding    | PF02854 |
| MSTRG. 3114. 15 | 6706  | coding    | PF02854 |
| MSTRG. 3122. 1  | 546   | noncoding | –       |
| MSTRG. 3124. 3  | 4095  | noncoding | –       |
| MSTRG. 3124. 4  | 3422  | noncoding | –       |
| MSTRG. 3124. 5  | 3408  | noncoding | –       |
| MSTRG. 3124. 8  | 3718  | noncoding | –       |
| MSTRG. 3100. 1  | 2860  | noncoding | –       |
| MSTRG. 3101. 1  | 4100  | coding    | PF00225 |
| MSTRG. 3101. 3  | 4036  | coding    | PF00225 |
| MSTRG. 3101. 2  | 8631  | coding    | PF00225 |
| MSTRG. 3101. 4  | 3884  | coding    | PF00225 |
| MSTRG. 3101. 5  | 1515  | noncoding | –       |
| MSTRG. 3104. 1  | 1983  | noncoding | –       |
| MSTRG. 3101. 6  | 2023  | coding    | PF03345 |
| MSTRG. 3096. 2  | 2463  | coding    | PF13920 |
| MSTRG. 3106. 3  | 3892  | coding    | PF13768 |
| MSTRG. 3106. 4  | 3752  | coding    | PF13768 |
| MSTRG. 3106. 5  | 3629  | coding    | PF13768 |
| MSTRG. 3106. 6  | 3730  | coding    | PF13768 |
| MSTRG. 3106. 7  | 1690  | coding    | PF13768 |
| MSTRG. 3106. 8  | 953   | noncoding | –       |
| MSTRG. 3109. 1  | 1417  | coding    | PF00068 |
| MSTRG. 3111. 1  | 757   | noncoding | –       |
| MSTRG. 3125. 3  | 1736  | coding    | PF03045 |
| MSTRG. 3126. 2  | 638   | noncoding | –       |
| MSTRG. 3127. 3  | 1366  | coding    | PF01115 |
| MSTRG. 3127. 4  | 1404  | coding    | PF01115 |
| MSTRG. 3130. 1  | 1064  | coding    | PF00248 |
| MSTRG. 3130. 2  | 4167  | coding    | PF00248 |

|                 |       |           |         |
|-----------------|-------|-----------|---------|
| MSTRG. 3130. 3  | 4060  | coding    | PF00248 |
| MSTRG. 3132. 1  | 2769  | noncoding | –       |
| MSTRG. 3132. 3  | 1972  | noncoding | –       |
| MSTRG. 3133. 1  | 5271  | coding    | PF07774 |
| MSTRG. 3133. 3  | 4412  | coding    | PF07774 |
| MSTRG. 3133. 4  | 4326  | coding    | PF07774 |
| MSTRG. 3133. 5  | 4329  | coding    | PF07774 |
| MSTRG. 3134. 1  | 2278  | noncoding | –       |
| MSTRG. 3144. 2  | 15753 | coding    | PF13764 |
| MSTRG. 3136. 1  | 2374  | noncoding | –       |
| MSTRG. 3137. 1  | 972   | noncoding | –       |
| MSTRG. 3135. 1  | 988   | noncoding | –       |
| MSTRG. 3135. 2  | 684   | noncoding | –       |
| MSTRG. 3141. 1  | 654   | noncoding | –       |
| MSTRG. 3146. 1  | 548   | noncoding | –       |
| MSTRG. 3146. 2  | 993   | noncoding | –       |
| MSTRG. 3153. 1  | 631   | noncoding | –       |
| MSTRG. 3154. 1  | 4439  | coding    | PF00621 |
| MSTRG. 3154. 4  | 4416  | coding    | PF00621 |
| MSTRG. 3154. 5  | 1961  | coding    | PF00621 |
| MSTRG. 3155. 1  | 1717  | noncoding | –       |
| MSTRG. 3151. 1  | 473   | noncoding | –       |
| MSTRG. 3152. 1  | 927   | coding    | PF03068 |
| MSTRG. 3157. 2  | 1490  | coding    | PF13085 |
| MSTRG. 3157. 3  | 1360  | coding    | PF13085 |
| MSTRG. 3157. 5  | 1313  | coding    | PF13085 |
| MSTRG. 3163. 1  | 1505  | noncoding | –       |
| MSTRG. 3166. 3  | 7976  | noncoding | –       |
| MSTRG. 3166. 6  | 1214  | noncoding | –       |
| MSTRG. 3166. 7  | 1071  | noncoding | –       |
| MSTRG. 3159. 4  | 5642  | noncoding | –       |
| MSTRG. 3179. 7  | 9743  | noncoding | –       |
| MSTRG. 3179. 9  | 1972  | noncoding | –       |
| MSTRG. 3179. 10 | 10496 | noncoding | –       |
| MSTRG. 3179. 11 | 2632  | coding    | PF00078 |
| MSTRG. 3183. 1  | 3120  | coding    | PF04666 |
| MSTRG. 3173. 1  | 1416  | noncoding | –       |
| MSTRG. 3176. 1  | 7359  | coding    | PF04178 |
| MSTRG. 3177. 1  | 417   | noncoding | –       |
| MSTRG. 3178. 3  | 3435  | coding    | PF01359 |
| MSTRG. 3185. 1  | 4959  | noncoding | –       |
| MSTRG. 3185. 2  | 10303 | coding    | PF15761 |
| MSTRG. 3186. 1  | 14103 | coding    | PF01359 |
| MSTRG. 3185. 3  | 4189  | noncoding | –       |
| MSTRG. 3186. 6  | 9912  | noncoding | –       |
| MSTRG. 3186. 4  | 3402  | noncoding | –       |
| MSTRG. 3186. 9  | 3208  | noncoding | –       |
| MSTRG. 3186. 10 | 3156  | noncoding | –       |
| MSTRG. 3186. 11 | 3310  | noncoding | –       |
| MSTRG. 3186. 12 | 5425  | noncoding | –       |
| MSTRG. 3187. 1  | 5376  | noncoding | –       |
| MSTRG. 3188. 1  | 5010  | noncoding | –       |
| MSTRG. 3189. 1  | 1178  | coding    | PF03650 |
| MSTRG. 3190. 2  | 1471  | noncoding | –       |

|               |       |           |         |
|---------------|-------|-----------|---------|
| MSTRG. 3190.3 | 1468  | noncoding | —       |
| MSTRG. 3197.1 | 1440  | noncoding | —       |
| MSTRG. 3198.1 | 1153  | noncoding | —       |
| MSTRG. 3214.1 | 4637  | noncoding | —       |
| MSTRG. 3221.1 | 1186  | noncoding | —       |
| MSTRG. 3226.1 | 1025  | noncoding | —       |
| MSTRG. 3228.2 | 4508  | coding    | PF03184 |
| MSTRG. 3215.1 | 1290  | noncoding | —       |
| MSTRG. 3217.1 | 769   | noncoding | —       |
| MSTRG. 3218.1 | 4544  | noncoding | —       |
| MSTRG. 3220.1 | 358   | noncoding | —       |
| MSTRG. 3234.2 | 1164  | noncoding | —       |
| MSTRG. 3248.1 | 7473  | noncoding | —       |
| MSTRG. 3249.1 | 9651  | noncoding | —       |
| MSTRG. 3243.1 | 833   | noncoding | —       |
| MSTRG. 3244.1 | 430   | noncoding | —       |
| MSTRG. 3245.1 | 282   | noncoding | —       |
| MSTRG. 3252.1 | 2916  | noncoding | —       |
| MSTRG. 3252.3 | 2874  | noncoding | —       |
| MSTRG. 3252.4 | 4189  | noncoding | —       |
| MSTRG. 3252.5 | 4043  | noncoding | —       |
| MSTRG. 3254.1 | 801   | coding    | PF15768 |
| MSTRG. 3259.3 | 3403  | noncoding | —       |
| MSTRG. 3259.4 | 3350  | noncoding | —       |
| MSTRG. 3261.1 | 887   | coding    | PF01852 |
| MSTRG. 3263.1 | 11233 | noncoding | —       |
| MSTRG. 3264.1 | 615   | noncoding | —       |
| MSTRG. 3267.2 | 3207  | coding    | PF02191 |
| MSTRG. 3267.4 | 2866  | coding    | PF02191 |
| MSTRG. 3269.1 | 2428  | noncoding | —       |
| MSTRG. 3270.2 | 6842  | noncoding | —       |
| MSTRG. 3270.3 | 6005  | coding    | PF02252 |
| MSTRG. 3271.1 | 4799  | noncoding | —       |
| MSTRG. 3279.1 | 4980  | noncoding | —       |
| MSTRG. 3282.2 | 1064  | coding    | PF01127 |
| MSTRG. 3282.3 | 962   | noncoding | —       |
| MSTRG. 3282.4 | 1019  | noncoding | —       |
| MSTRG. 3282.6 | 2608  | coding    | PF01127 |
| MSTRG. 3282.5 | 763   | coding    | PF01127 |
| MSTRG. 3282.7 | 688   | coding    | PF01127 |
| MSTRG. 3294.1 | 634   | noncoding | —       |
| MSTRG. 3294.2 | 293   | noncoding | —       |
| MSTRG. 3296.4 | 1045  | coding    | PF08694 |
| MSTRG. 3296.3 | 1112  | coding    | PF08694 |
| MSTRG. 3297.5 | 1646  | noncoding | —       |
| MSTRG. 3300.1 | 5175  | noncoding | —       |
| MSTRG. 3300.2 | 1160  | noncoding | —       |
| MSTRG. 3287.1 | 364   | noncoding | —       |
| MSTRG. 3307.1 | 5616  | coding    | PF06638 |
| MSTRG. 3307.4 | 6048  | coding    | PF06638 |
| MSTRG. 3307.2 | 8418  | coding    | PF06638 |
| MSTRG. 3307.3 | 5456  | coding    | PF06638 |
| MSTRG. 3307.6 | 5089  | coding    | PF06638 |
| MSTRG. 3312.1 | 22351 | coding    | PF04614 |

|                |       |           |         |
|----------------|-------|-----------|---------|
| MSTRG. 3314. 1 | 6724  | noncoding | -       |
| MSTRG. 3317. 2 | 3411  | coding    | PF00122 |
| MSTRG. 3317. 3 | 2952  | coding    | PF00122 |
| MSTRG. 3317. 4 | 2869  | coding    | PF00122 |
| MSTRG. 3317. 5 | 2939  | coding    | PF00122 |
| MSTRG. 3317. 6 | 2979  | coding    | PF00122 |
| MSTRG. 3320. 1 | 7012  | noncoding | -       |
| MSTRG. 3321. 4 | 1447  | coding    | PF00307 |
| MSTRG. 3321. 3 | 1536  | coding    | PF00307 |
| MSTRG. 3321. 6 | 1564  | coding    | PF00307 |
| MSTRG. 3333. 1 | 1564  | noncoding | -       |
| MSTRG. 3339. 3 | 9998  | coding    | PF13895 |
| MSTRG. 3339. 4 | 2520  | coding    | PF13895 |
| MSTRG. 3340. 1 | 4615  | noncoding | -       |
| MSTRG. 3342. 2 | 888   | coding    | PF00530 |
| MSTRG. 3342. 1 | 1127  | coding    | PF00530 |
| MSTRG. 3343. 1 | 1179  | noncoding | -       |
| MSTRG. 3343. 2 | 3455  | noncoding | -       |
| MSTRG. 3346. 1 | 298   | noncoding | -       |
| MSTRG. 3354. 3 | 274   | coding    | PF00178 |
| MSTRG. 3357. 1 | 6946  | coding    | PF09128 |
| MSTRG. 3357. 2 | 7066  | coding    | PF09128 |
| MSTRG. 3358. 1 | 2728  | noncoding | -       |
| MSTRG. 3357. 4 | 6096  | coding    | PF09128 |
| MSTRG. 3359. 6 | 798   | noncoding | -       |
| MSTRG. 3364. 1 | 2265  | noncoding | -       |
| MSTRG. 3364. 3 | 2303  | noncoding | -       |
| MSTRG. 3364. 4 | 2762  | noncoding | -       |
| MSTRG. 3364. 5 | 2340  | noncoding | -       |
| MSTRG. 3364. 6 | 2541  | noncoding | -       |
| MSTRG. 3364. 7 | 2039  | noncoding | -       |
| MSTRG. 3371. 1 | 1934  | noncoding | -       |
| MSTRG. 3373. 2 | 5028  | coding    | PF00616 |
| MSTRG. 3374. 3 | 13965 | noncoding | -       |
| MSTRG. 3375. 1 | 682   | noncoding | -       |
| MSTRG. 3381. 2 | 987   | noncoding | -       |
| MSTRG. 3384. 1 | 3026  | coding    | PF01403 |
| MSTRG. 3389. 3 | 7560  | coding    | PF00240 |
| MSTRG. 3389. 2 | 3550  | coding    | PF00240 |
| MSTRG. 3389. 4 | 4331  | coding    | PF00240 |
| MSTRG. 3390. 2 | 847   | noncoding | -       |
| MSTRG. 3415. 2 | 1168  | noncoding | -       |
| MSTRG. 3415. 3 | 2842  | noncoding | -       |
| MSTRG. 3418. 1 | 1886  | coding    | PF10236 |
| MSTRG. 3420. 6 | 10753 | coding    | PF00856 |
| MSTRG. 3420. 7 | 10570 | coding    | PF00856 |
| MSTRG. 3420. 8 | 10654 | coding    | PF00856 |
| MSTRG. 3421. 1 | 2496  | noncoding | -       |
| MSTRG. 3424. 1 | 2586  | coding    | PF00348 |
| MSTRG. 3400. 2 | 4137  | coding    | PF04144 |
| MSTRG. 3400. 6 | 3937  | coding    | PF04144 |
| MSTRG. 3400. 3 | 4013  | coding    | PF04144 |
| MSTRG. 3400. 4 | 3928  | coding    | PF04144 |
| MSTRG. 3401. 2 | 3141  | noncoding | -       |

|                 |       |           |         |
|-----------------|-------|-----------|---------|
| MSTRG. 3402. 2  | 1456  | coding    | PF11801 |
| MSTRG. 3427. 2  | 1589  | noncoding | –       |
| MSTRG. 3429. 1  | 2351  | coding    | PF00651 |
| MSTRG. 3434. 8  | 3248  | coding    | PF00640 |
| MSTRG. 3435. 1  | 3689  | noncoding | –       |
| MSTRG. 3435. 3  | 4157  | noncoding | –       |
| MSTRG. 3438. 1  | 1707  | noncoding | –       |
| MSTRG. 3444. 1  | 12624 | coding    | PF02137 |
| MSTRG. 3444. 3  | 12487 | coding    | PF02137 |
| MSTRG. 3444. 5  | 6318  | coding    | PF02137 |
| MSTRG. 3444. 7  | 6482  | coding    | PF02137 |
| MSTRG. 3444. 12 | 8907  | coding    | PF02137 |
| MSTRG. 3444. 13 | 5807  | coding    | PF02137 |
| MSTRG. 3441. 3  | 1403  | coding    | PF00076 |
| MSTRG. 3441. 4  | 1365  | noncoding | –       |
| MSTRG. 3446. 1  | 734   | noncoding | –       |
| MSTRG. 3470. 3  | 1175  | noncoding | –       |
| MSTRG. 3471. 3  | 4444  | noncoding | –       |
| MSTRG. 3471. 1  | 4073  | noncoding | –       |
| MSTRG. 3471. 5  | 3434  | noncoding | –       |
| MSTRG. 3471. 4  | 3661  | noncoding | –       |
| MSTRG. 3471. 10 | 4195  | noncoding | –       |
| MSTRG. 3471. 11 | 3599  | noncoding | –       |
| MSTRG. 3471. 12 | 4110  | noncoding | –       |
| MSTRG. 3471. 13 | 3907  | noncoding | –       |
| MSTRG. 3471. 14 | 4148  | noncoding | –       |
| MSTRG. 3471. 16 | 2112  | noncoding | –       |
| MSTRG. 3472. 3  | 1318  | coding    | PF07406 |
| MSTRG. 3474. 1  | 1688  | noncoding | –       |
| MSTRG. 3475. 1  | 4985  | coding    | PF00261 |
| MSTRG. 3475. 3  | 1867  | coding    | PF00261 |
| MSTRG. 3477. 1  | 598   | noncoding | –       |
| MSTRG. 3477. 2  | 454   | noncoding | –       |
| MSTRG. 3478. 5  | 5822  | noncoding | –       |
| MSTRG. 3478. 7  | 6515  | noncoding | –       |
| MSTRG. 3482. 1  | 1162  | coding    | PF00071 |
| MSTRG. 3447. 2  | 1238  | coding    | PF05439 |
| MSTRG. 3454. 1  | 571   | noncoding | –       |
| MSTRG. 3463. 2  | 789   | noncoding | –       |
| MSTRG. 3469. 2  | 723   | noncoding | –       |
| MSTRG. 3493. 2  | 1320  | noncoding | –       |
| MSTRG. 3497. 1  | 374   | noncoding | –       |
| MSTRG. 3498. 2  | 2980  | coding    | PF00567 |
| MSTRG. 3504. 1  | 4022  | noncoding | –       |
| MSTRG. 3509. 1  | 632   | noncoding | –       |
| MSTRG. 3521. 1  | 8349  | coding    | PF00454 |
| MSTRG. 3521. 2  | 3747  | coding    | PF00454 |
| MSTRG. 3521. 3  | 3716  | coding    | PF00454 |
| MSTRG. 3521. 4  | 3608  | coding    | PF00454 |
| MSTRG. 3521. 5  | 3716  | coding    | PF00454 |
| MSTRG. 3521. 6  | 3617  | coding    | PF00454 |
| MSTRG. 3521. 7  | 3706  | coding    | PF00454 |
| MSTRG. 3521. 11 | 4437  | coding    | PF00454 |
| MSTRG. 3530. 4  | 965   | coding    | PF15805 |

|                |       |           |         |
|----------------|-------|-----------|---------|
| MSTRG. 3536. 2 | 924   | noncoding | -       |
| MSTRG. 3536. 3 | 833   | noncoding | -       |
| MSTRG. 3536. 4 | 765   | noncoding | -       |
| MSTRG. 3536. 5 | 689   | noncoding | -       |
| MSTRG. 3536. 6 | 869   | noncoding | -       |
| MSTRG. 3543. 3 | 4173  | coding    | PF02833 |
| MSTRG. 3544. 1 | 2445  | coding    | PF04424 |
| MSTRG. 3544. 2 | 2698  | coding    | PF04424 |
| MSTRG. 3544. 4 | 2332  | coding    | PF04424 |
| MSTRG. 3544. 3 | 3220  | coding    | PF04424 |
| MSTRG. 3544. 7 | 2993  | coding    | PF04424 |
| MSTRG. 3546. 1 | 2102  | coding    | PF03798 |
| MSTRG. 3547. 5 | 4341  | coding    | PF05033 |
| MSTRG. 3547. 4 | 4409  | coding    | PF05033 |
| MSTRG. 3547. 6 | 2195  | noncoding | -       |
| MSTRG. 3542. 4 | 4597  | noncoding | -       |
| MSTRG. 3550. 3 | 3064  | noncoding | -       |
| MSTRG. 3548. 1 | 1087  | noncoding | -       |
| MSTRG. 3557. 2 | 8057  | coding    | PF04818 |
| MSTRG. 3557. 3 | 8135  | coding    | PF04818 |
| MSTRG. 3558. 1 | 2072  | noncoding | -       |
| MSTRG. 3559. 1 | 17056 | coding    | PF00078 |
| MSTRG. 3561. 4 | 1878  | coding    | PF08572 |
| MSTRG. 3561. 5 | 2637  | coding    | PF08572 |
| MSTRG. 3561. 6 | 2741  | coding    | PF08572 |
| MSTRG. 3561. 7 | 2314  | coding    | PF08572 |
| MSTRG. 3563. 3 | 1301  | coding    | PF15673 |
| MSTRG. 3563. 4 | 1367  | coding    | PF15673 |
| MSTRG. 3565. 1 | 1991  | coding    | PF06105 |
| MSTRG. 3562. 1 | 3427  | noncoding | -       |
| MSTRG. 3566. 3 | 1354  | noncoding | -       |
| MSTRG. 3566. 2 | 1400  | noncoding | -       |
| MSTRG. 3570. 2 | 5934  | noncoding | -       |
| MSTRG. 3580. 1 | 2561  | noncoding | -       |
| MSTRG. 3580. 2 | 2174  | noncoding | -       |
| MSTRG. 3588. 6 | 1497  | noncoding | -       |
| MSTRG. 3588. 7 | 1378  | noncoding | -       |
| MSTRG. 3592. 6 | 1280  | noncoding | -       |
| MSTRG. 3593. 3 | 1287  | noncoding | -       |
| MSTRG. 3598. 1 | 1311  | noncoding | -       |
| MSTRG. 3602. 1 | 1831  | noncoding | -       |
| MSTRG. 3604. 2 | 3733  | coding    | PF14954 |
| MSTRG. 3604. 3 | 3736  | coding    | PF14954 |
| MSTRG. 3604. 4 | 3697  | coding    | PF14954 |
| MSTRG. 3604. 5 | 3239  | noncoding | -       |
| MSTRG. 3604. 6 | 3123  | coding    | PF00076 |
| MSTRG. 3606. 2 | 1583  | coding    | PF05648 |
| MSTRG. 3606. 3 | 1589  | coding    | PF05648 |
| MSTRG. 3612. 3 | 2594  | noncoding | -       |
| MSTRG. 3612. 2 | 6649  | coding    | PF13639 |
| MSTRG. 3612. 4 | 3023  | coding    | PF13639 |
| MSTRG. 3614. 1 | 923   | noncoding | -       |
| MSTRG. 3623. 1 | 11680 | coding    | PF12537 |
| MSTRG. 3623. 2 | 1563  | coding    | PF12537 |

|                 |      |           |         |
|-----------------|------|-----------|---------|
| MSTRG. 3623. 7  | 2479 | coding    | PF12430 |
| MSTRG. 3631. 1  | 505  | noncoding | –       |
| MSTRG. 3633. 4  | 7667 | noncoding | –       |
| MSTRG. 3642. 2  | 3242 | coding    | PF06758 |
| MSTRG. 3642. 3  | 3023 | coding    | PF06758 |
| MSTRG. 3650. 1  | 2020 | noncoding | –       |
| MSTRG. 3651. 1  | 3572 | coding    | PF08516 |
| MSTRG. 3652. 1  | 3048 | coding    | PF08516 |
| MSTRG. 3654. 1  | 2208 | noncoding | –       |
| MSTRG. 3658. 1  | 355  | noncoding | –       |
| MSTRG. 3659. 2  | 1487 | coding    | PF00579 |
| MSTRG. 3663. 1  | 1300 | noncoding | –       |
| MSTRG. 3664. 1  | 384  | noncoding | –       |
| MSTRG. 3675. 1  | 8445 | coding    | PF01532 |
| MSTRG. 3675. 2  | 7898 | coding    | PF01532 |
| MSTRG. 3675. 3  | 7318 | coding    | PF01532 |
| MSTRG. 3675. 4  | 5368 | coding    | PF01532 |
| MSTRG. 3675. 5  | 5608 | coding    | PF01532 |
| MSTRG. 3675. 6  | 6134 | coding    | PF01532 |
| MSTRG. 3675. 7  | 3627 | coding    | PF01532 |
| MSTRG. 3675. 8  | 7054 | coding    | PF01532 |
| MSTRG. 3675. 9  | 6708 | coding    | PF01532 |
| MSTRG. 3675. 10 | 5238 | coding    | PF01532 |
| MSTRG. 3675. 11 | 7489 | coding    | PF01532 |
| MSTRG. 3676. 1  | 5543 | noncoding | –       |
| MSTRG. 3674. 1  | 255  | noncoding | –       |
| MSTRG. 3679. 1  | 2371 | coding    | PF00630 |
| MSTRG. 3679. 2  | 2718 | coding    | PF00630 |
| MSTRG. 3679. 3  | 2515 | coding    | PF00630 |
| MSTRG. 3685. 1  | 6906 | noncoding | –       |
| MSTRG. 3685. 2  | 7582 | noncoding | –       |
| MSTRG. 3687. 2  | 4358 | noncoding | –       |
| MSTRG. 3694. 1  | 921  | coding    | PF01216 |
| MSTRG. 3702. 2  | 6702 | coding    | PF05483 |
| MSTRG. 3702. 3  | 5242 | coding    | PF05483 |
| MSTRG. 3704. 1  | 593  | noncoding | –       |
| MSTRG. 3707. 2  | 5165 | coding    | PF02141 |
| MSTRG. 3707. 3  | 346  | noncoding | –       |
| MSTRG. 3708. 2  | 982  | noncoding | –       |
| MSTRG. 3710. 1  | 7925 | coding    | PF00439 |
| MSTRG. 3712. 1  | 4536 | coding    | PF01359 |
| MSTRG. 3710. 4  | 7422 | coding    | PF00439 |
| MSTRG. 3710. 5  | 7522 | coding    | PF00439 |
| MSTRG. 3716. 2  | 7527 | coding    | PF00069 |
| MSTRG. 3716. 3  | 7653 | coding    | PF00069 |
| MSTRG. 3716. 5  | 8341 | coding    | PF00069 |
| MSTRG. 3716. 6  | 8003 | coding    | PF00069 |
| MSTRG. 3716. 7  | 7676 | coding    | PF00069 |
| MSTRG. 3716. 9  | 3456 | coding    | PF00069 |
| MSTRG. 3725. 1  | 8224 | coding    | PF01602 |
| MSTRG. 3733. 3  | 919  | noncoding | –       |
| MSTRG. 3737. 2  | 3876 | noncoding | –       |
| MSTRG. 3721. 1  | 4753 | coding    | PF12020 |
| MSTRG. 3721. 2  | 1845 | coding    | PF12020 |

|                |       |           |         |
|----------------|-------|-----------|---------|
| MSTRG. 3722. 1 | 1873  | noncoding | -       |
| MSTRG. 3748. 4 | 2718  | coding    | PF00071 |
| MSTRG. 3749. 6 | 3315  | coding    | PF13087 |
| MSTRG. 3749. 7 | 3246  | coding    | PF13087 |
| MSTRG. 3749. 3 | 3243  | coding    | PF13087 |
| MSTRG. 3749. 5 | 3349  | coding    | PF13087 |
| MSTRG. 3755. 1 | 3044  | noncoding | -       |
| MSTRG. 3764. 2 | 4984  | coding    | PF00071 |
| MSTRG. 3765. 1 | 1041  | noncoding | -       |
| MSTRG. 3765. 2 | 2916  | noncoding | -       |
| MSTRG. 3767. 1 | 1140  | noncoding | -       |
| MSTRG. 3768. 1 | 1081  | noncoding | -       |
| MSTRG. 3769. 1 | 1333  | noncoding | -       |
| MSTRG. 3770. 1 | 925   | noncoding | -       |
| MSTRG. 3773. 2 | 1145  | noncoding | -       |
| MSTRG. 3773. 3 | 4940  | noncoding | -       |
| MSTRG. 3773. 4 | 6649  | noncoding | -       |
| MSTRG. 3777. 2 | 559   | noncoding | -       |
| MSTRG. 3778. 1 | 2126  | coding    | PF00704 |
| MSTRG. 3756. 2 | 968   | noncoding | -       |
| MSTRG. 3780. 4 | 4142  | coding    | PF15741 |
| MSTRG. 3780. 5 | 1362  | noncoding | -       |
| MSTRG. 3784. 1 | 776   | noncoding | -       |
| MSTRG. 3788. 1 | 2165  | noncoding | -       |
| MSTRG. 3789. 1 | 6286  | coding    | PF00076 |
| MSTRG. 3789. 3 | 10170 | coding    | PF00076 |
| MSTRG. 3790. 1 | 2168  | noncoding | -       |
| MSTRG. 3800. 1 | 1010  | coding    | PF00043 |
| MSTRG. 3802. 2 | 1194  | coding    | PF00043 |
| MSTRG. 3802. 3 | 1194  | coding    | PF00043 |
| MSTRG. 3802. 4 | 1193  | coding    | PF00043 |
| MSTRG. 3802. 5 | 1193  | coding    | PF00043 |
| MSTRG. 3804. 1 | 4148  | coding    | PF00962 |
| MSTRG. 3807. 1 | 1490  | noncoding | -       |
| MSTRG. 3813. 1 | 1521  | noncoding | -       |
| MSTRG. 3817. 3 | 6378  | coding    | PF16489 |
| MSTRG. 3821. 2 | 4799  | noncoding | -       |
| MSTRG. 3821. 1 | 6604  | noncoding | -       |
| MSTRG. 3821. 4 | 3747  | noncoding | -       |
| MSTRG. 3831. 5 | 2136  | coding    | PF05934 |
| MSTRG. 3832. 3 | 2852  | noncoding | -       |
| MSTRG. 3832. 4 | 3170  | noncoding | -       |
| MSTRG. 3832. 5 | 3779  | noncoding | -       |
| MSTRG. 3833. 1 | 985   | noncoding | -       |
| MSTRG. 3834. 1 | 2662  | coding    | PF12443 |
| MSTRG. 3834. 2 | 6434  | coding    | PF12443 |
| MSTRG. 3839. 1 | 2323  | coding    | PF00995 |
| MSTRG. 3825. 2 | 3901  | noncoding | -       |
| MSTRG. 3825. 1 | 3823  | noncoding | -       |
| MSTRG. 3828. 1 | 1449  | noncoding | -       |
| MSTRG. 3842. 1 | 6432  | coding    | PF00153 |
| MSTRG. 3842. 2 | 6580  | coding    | PF00153 |
| MSTRG. 3842. 3 | 5386  | coding    | PF00153 |
| MSTRG. 3842. 4 | 3144  | noncoding | -       |



|                |       |           |         |
|----------------|-------|-----------|---------|
| MSTRG. 3842. 6 | 1963  | coding    | PF00153 |
| MSTRG. 3855. 1 | 4547  | noncoding | –       |
| MSTRG. 3854. 3 | 4598  | coding    | PF00055 |
| MSTRG. 3856. 1 | 1055  | noncoding | –       |
| MSTRG. 3852. 1 | 1365  | noncoding | –       |
| MSTRG. 3852. 2 | 2109  | noncoding | –       |
| MSTRG. 3868. 1 | 1703  | noncoding | –       |
| MSTRG. 3969. 1 | 4659  | noncoding | –       |
| MSTRG. 3970. 1 | 3249  | noncoding | –       |
| MSTRG. 3971. 1 | 2968  | noncoding | –       |
| MSTRG. 3975. 1 | 3862  | noncoding | –       |
| MSTRG. 3976. 1 | 2004  | coding    | PF00078 |
| MSTRG. 3977. 1 | 6824  | noncoding | –       |
| MSTRG. 3978. 1 | 5107  | noncoding | –       |
| MSTRG. 3979. 1 | 3486  | noncoding | –       |
| MSTRG. 3980. 1 | 457   | noncoding | –       |
| MSTRG. 3972. 5 | 11297 | noncoding | –       |
| MSTRG. 3981. 1 | 1480  | noncoding | –       |
| MSTRG. 3982. 1 | 1843  | noncoding | –       |
| MSTRG. 3983. 1 | 3232  | noncoding | –       |
| MSTRG. 3983. 2 | 1166  | noncoding | –       |
| MSTRG. 3984. 1 | 5506  | noncoding | –       |
| MSTRG. 3984. 2 | 3276  | noncoding | –       |
| MSTRG. 3985. 1 | 6073  | noncoding | –       |
| MSTRG. 3985. 2 | 4108  | noncoding | –       |
| MSTRG. 3972. 6 | 6526  | noncoding | –       |
| MSTRG. 3986. 1 | 1506  | noncoding | –       |
| MSTRG. 3987. 1 | 5423  | noncoding | –       |
| MSTRG. 3987. 2 | 4246  | noncoding | –       |
| MSTRG. 3987. 3 | 3742  | noncoding | –       |
| MSTRG. 3987. 4 | 919   | noncoding | –       |
| MSTRG. 3989. 1 | 5822  | noncoding | –       |
| MSTRG. 3972. 9 | 4446  | noncoding | –       |
| MSTRG. 3991. 1 | 1074  | noncoding | –       |
| MSTRG. 3877. 1 | 3647  | noncoding | –       |
| MSTRG. 3883. 1 | 322   | noncoding | –       |
| MSTRG. 3889. 2 | 3206  | coding    | PF09258 |
| MSTRG. 3890. 1 | 2641  | coding    | PF13895 |
| MSTRG. 3893. 1 | 3562  | noncoding | –       |
| MSTRG. 3895. 3 | 2062  | coding    | PF14671 |
| MSTRG. 3895. 4 | 2362  | coding    | PF14671 |
| MSTRG. 3895. 6 | 1415  | noncoding | –       |
| MSTRG. 3895. 7 | 2019  | coding    | PF14671 |
| MSTRG. 3896. 1 | 339   | noncoding | –       |
| MSTRG. 3897. 1 | 1433  | coding    | PF01137 |
| MSTRG. 3900. 2 | 3595  | coding    | PF05206 |
| MSTRG. 3902. 2 | 3980  | coding    | PF16531 |
| MSTRG. 3903. 2 | 2628  | noncoding | –       |
| MSTRG. 3903. 3 | 2503  | noncoding | –       |
| MSTRG. 3903. 4 | 2325  | noncoding | –       |
| MSTRG. 3903. 5 | 6908  | noncoding | –       |
| MSTRG. 3910. 2 | 4152  | coding    | PF06202 |
| MSTRG. 3911. 3 | 2492  | coding    | PF02014 |
| MSTRG. 3913. 3 | 4599  | noncoding | –       |

|                 |       |           |         |
|-----------------|-------|-----------|---------|
| MSTRG. 3918. 1  | 688   | noncoding | —       |
| MSTRG. 3935. 6  | 3045  | noncoding | —       |
| MSTRG. 3935. 5  | 3091  | noncoding | —       |
| MSTRG. 3935. 7  | 2975  | noncoding | —       |
| MSTRG. 3935. 8  | 1962  | noncoding | —       |
| MSTRG. 3935. 9  | 2073  | noncoding | —       |
| MSTRG. 3935. 11 | 2747  | noncoding | —       |
| MSTRG. 3936. 1  | 816   | noncoding | —       |
| MSTRG. 3937. 1  | 3504  | noncoding | —       |
| MSTRG. 3930. 1  | 858   | noncoding | —       |
| MSTRG. 3934. 1  | 2109  | noncoding | —       |
| MSTRG. 3939. 2  | 1098  | noncoding | —       |
| MSTRG. 3939. 4  | 660   | noncoding | —       |
| MSTRG. 3940. 3  | 5947  | noncoding | —       |
| MSTRG. 3940. 6  | 3306  | noncoding | —       |
| MSTRG. 3940. 7  | 3309  | noncoding | —       |
| MSTRG. 3941. 1  | 492   | noncoding | —       |
| MSTRG. 3954. 1  | 448   | noncoding | —       |
| MSTRG. 3959. 2  | 2156  | coding    | PF06472 |
| MSTRG. 3960. 1  | 827   | noncoding | —       |
| MSTRG. 3963. 3  | 4101  | coding    | PF00620 |
| MSTRG. 3964. 1  | 836   | noncoding | —       |
| MSTRG. 3963. 6  | 2716  | coding    | PF00620 |
| MSTRG. 3965. 2  | 6797  | noncoding | —       |
| MSTRG. 3993. 2  | 5195  | coding    | PF08698 |
| MSTRG. 3995. 1  | 469   | noncoding | —       |
| MSTRG. 3997. 3  | 4775  | noncoding | —       |
| MSTRG. 3997. 2  | 24021 | noncoding | —       |
| MSTRG. 4000. 1  | 1893  | noncoding | —       |
| MSTRG. 4003. 1  | 4423  | noncoding | —       |
| MSTRG. 4003. 3  | 5162  | noncoding | —       |
| MSTRG. 4003. 4  | 5696  | noncoding | —       |
| MSTRG. 4004. 1  | 5092  | noncoding | —       |
| MSTRG. 4006. 1  | 7922  | coding    | PF00808 |
| MSTRG. 4006. 2  | 2182  | coding    | PF00808 |
| MSTRG. 4010. 2  | 6017  | noncoding | —       |
| MSTRG. 4010. 1  | 5410  | noncoding | —       |
| MSTRG. 4010. 3  | 16470 | noncoding | —       |
| MSTRG. 4011. 1  | 1904  | noncoding | —       |
| MSTRG. 4010. 6  | 3121  | noncoding | —       |
| MSTRG. 4014. 1  | 3180  | noncoding | —       |
| MSTRG. 4017. 1  | 3984  | coding    | PF14061 |
| MSTRG. 4017. 3  | 2570  | coding    | PF14061 |
| MSTRG. 4008. 3  | 2598  | coding    | PF00566 |
| MSTRG. 4020. 1  | 6337  | noncoding | —       |
| MSTRG. 4023. 2  | 3674  | noncoding | —       |
| MSTRG. 4024. 2  | 623   | coding    | PF15162 |
| MSTRG. 4024. 4  | 568   | coding    | PF15162 |
| MSTRG. 4024. 5  | 537   | coding    | PF15162 |
| MSTRG. 4026. 1  | 3612  | coding    | PF17035 |
| MSTRG. 4026. 2  | 3468  | coding    | PF17035 |
| MSTRG. 4026. 3  | 3463  | coding    | PF17035 |
| MSTRG. 4026. 4  | 4878  | coding    | PF17035 |
| MSTRG. 4026. 5  | 3440  | coding    | PF17035 |

|                |       |           |         |
|----------------|-------|-----------|---------|
| MSTRG. 4026. 6 | 3170  | coding    | PF17035 |
| MSTRG. 4028. 5 | 6035  | noncoding | —       |
| MSTRG. 4028. 6 | 4436  | noncoding | —       |
| MSTRG. 4028. 7 | 4446  | noncoding | —       |
| MSTRG. 4028. 8 | 5876  | noncoding | —       |
| MSTRG. 4028. 9 | 4382  | noncoding | —       |
| MSTRG. 4030. 3 | 3434  | noncoding | —       |
| MSTRG. 4036. 1 | 6704  | noncoding | —       |
| MSTRG. 4037. 1 | 314   | noncoding | —       |
| MSTRG. 4047. 3 | 5667  | noncoding | —       |
| MSTRG. 4047. 4 | 1669  | noncoding | —       |
| MSTRG. 4047. 5 | 5624  | noncoding | —       |
| MSTRG. 4047. 6 | 4852  | noncoding | —       |
| MSTRG. 4047. 7 | 4202  | noncoding | —       |
| MSTRG. 4047. 8 | 8437  | noncoding | —       |
| MSTRG. 4047. 9 | 3825  | noncoding | —       |
| MSTRG. 4038. 1 | 1866  | noncoding | —       |
| MSTRG. 4051. 1 | 3991  | noncoding | —       |
| MSTRG. 4051. 2 | 11712 | noncoding | —       |
| MSTRG. 4052. 4 | 2075  | coding    | PF04988 |
| MSTRG. 4053. 1 | 2594  | coding    | PF12534 |
| MSTRG. 4055. 1 | 806   | noncoding | —       |
| MSTRG. 4058. 1 | 6582  | coding    | PF12534 |
| MSTRG. 4058. 5 | 5031  | coding    | PF12534 |
| MSTRG. 4072. 1 | 2120  | coding    | PF02263 |
| MSTRG. 4072. 3 | 344   | coding    | PF02263 |
| MSTRG. 4074. 1 | 369   | coding    | PF02841 |
| MSTRG. 4079. 1 | 2367  | coding    | PF02841 |
| MSTRG. 4080. 1 | 427   | coding    | PF02263 |
| MSTRG. 4081. 1 | 3913  | coding    | PF02841 |
| MSTRG. 4082. 1 | 611   | coding    | PF02263 |
| MSTRG. 4083. 1 | 1718  | coding    | PF02263 |
| MSTRG. 4068. 2 | 3405  | coding    | PF02185 |
| MSTRG. 4070. 1 | 399   | noncoding | —       |
| MSTRG. 4092. 3 | 17295 | coding    | PF12001 |
| MSTRG. 4092. 4 | 10095 | noncoding | —       |
| MSTRG. 4093. 1 | 3740  | noncoding | —       |
| MSTRG. 4093. 2 | 271   | coding    | PF00078 |
| MSTRG. 4094. 1 | 4358  | noncoding | —       |
| MSTRG. 4095. 1 | 1479  | noncoding | —       |
| MSTRG. 4096. 1 | 4472  | noncoding | —       |
| MSTRG. 4092. 5 | 8876  | noncoding | —       |
| MSTRG. 4092. 6 | 8574  | noncoding | —       |
| MSTRG. 4092. 7 | 1377  | noncoding | —       |
| MSTRG. 4092. 8 | 2232  | noncoding | —       |
| MSTRG. 4099. 1 | 6881  | coding    | PF03114 |
| MSTRG. 4104. 1 | 1411  | noncoding | —       |
| MSTRG. 4108. 1 | 2319  | noncoding | —       |
| MSTRG. 4108. 2 | 2106  | noncoding | —       |
| MSTRG. 4108. 3 | 4191  | noncoding | —       |
| MSTRG. 4108. 6 | 2034  | noncoding | —       |
| MSTRG. 4108. 5 | 2044  | noncoding | —       |
| MSTRG. 4116. 1 | 4131  | noncoding | —       |
| MSTRG. 4122. 3 | 4829  | noncoding | —       |

|                |      |           |         |
|----------------|------|-----------|---------|
| MSTRG. 4122. 2 | 2987 | noncoding | -       |
| MSTRG. 4122. 1 | 8733 | noncoding | -       |
| MSTRG. 4125. 3 | 2518 | noncoding | -       |
| MSTRG. 4129. 4 | 2607 | coding    | PF11559 |
| MSTRG. 4129. 7 | 2643 | coding    | PF11559 |
| MSTRG. 4129. 8 | 3375 | coding    | PF11559 |
| MSTRG. 4129. 9 | 3369 | coding    | PF11559 |
| MSTRG. 4130. 1 | 9426 | noncoding | -       |
| MSTRG. 4143. 2 | 2137 | coding    | PF15743 |
| MSTRG. 4143. 4 | 426  | noncoding | -       |
| MSTRG. 4143. 3 | 1895 | coding    | PF15743 |
| MSTRG. 4144. 1 | 366  | noncoding | -       |
| MSTRG. 4143. 6 | 4200 | noncoding | -       |
| MSTRG. 4146. 2 | 1475 | noncoding | -       |
| MSTRG. 4147. 1 | 496  | noncoding | -       |
| MSTRG. 4152. 2 | 1494 | noncoding | -       |
| MSTRG. 4131. 1 | 496  | noncoding | -       |
| MSTRG. 4132. 3 | 3703 | coding    | PF00069 |
| MSTRG. 4132. 5 | 3482 | coding    | PF00069 |
| MSTRG. 4132. 6 | 1571 | coding    | PF00069 |
| MSTRG. 4133. 1 | 9020 | noncoding | -       |
| MSTRG. 4134. 1 | 4348 | noncoding | -       |
| MSTRG. 4139. 1 | 5900 | noncoding | -       |
| MSTRG. 4163. 2 | 7000 | coding    | PF02354 |
| MSTRG. 4163. 1 | 7061 | coding    | PF02354 |
| MSTRG. 4163. 3 | 2609 | coding    | PF02354 |
| MSTRG. 4163. 4 | 5810 | coding    | PF02354 |
| MSTRG. 4163. 5 | 5763 | coding    | PF02354 |
| MSTRG. 4163. 6 | 7637 | coding    | PF02354 |
| MSTRG. 4163. 7 | 5138 | coding    | PF02354 |
| MSTRG. 4162. 1 | 216  | noncoding | -       |
| MSTRG. 4178. 5 | 8196 | coding    | PF00226 |
| MSTRG. 4178. 3 | 9969 | coding    | PF01556 |
| MSTRG. 4178. 6 | 1220 | coding    | PF00226 |
| MSTRG. 4178. 4 | 1221 | coding    | PF01556 |
| MSTRG. 4178. 8 | 1283 | coding    | PF01556 |
| MSTRG. 4178. 7 | 2033 | coding    | PF00226 |
| MSTRG. 4183. 1 | 2082 | noncoding | -       |
| MSTRG. 4186. 1 | 7118 | coding    | PF01359 |
| MSTRG. 4186. 2 | 3836 | coding    | PF00078 |
| MSTRG. 4186. 3 | 1528 | noncoding | -       |
| MSTRG. 4187. 1 | 833  | noncoding | -       |
| MSTRG. 4203. 3 | 1252 | noncoding | -       |
| MSTRG. 4203. 5 | 830  | noncoding | -       |
| MSTRG. 4203. 2 | 2675 | noncoding | -       |
| MSTRG. 4203. 6 | 1142 | noncoding | -       |
| MSTRG. 4203. 7 | 2374 | noncoding | -       |
| MSTRG. 4213. 3 | 1406 | noncoding | -       |
| MSTRG. 4214. 1 | 2634 | noncoding | -       |
| MSTRG. 4216. 1 | 592  | noncoding | -       |
| MSTRG. 4217. 3 | 894  | noncoding | -       |
| MSTRG. 4226. 1 | 4110 | coding    | PF11904 |
| MSTRG. 4226. 2 | 2213 | coding    | PF11904 |
| MSTRG. 4227. 1 | 910  | noncoding | -       |

|                |       |           |         |
|----------------|-------|-----------|---------|
| MSTRG. 4226. 3 | 2215  | coding    | PF11904 |
| MSTRG. 4228. 7 | 8390  | noncoding | —       |
| MSTRG. 4228. 3 | 7748  | noncoding | —       |
| MSTRG. 4229. 4 | 4684  | noncoding | —       |
| MSTRG. 4229. 2 | 5730  | noncoding | —       |
| MSTRG. 4229. 3 | 3002  | coding    | PF01359 |
| MSTRG. 4230. 1 | 936   | noncoding | —       |
| MSTRG. 4231. 1 | 219   | noncoding | —       |
| MSTRG. 4219. 1 | 289   | noncoding | —       |
| MSTRG. 4246. 3 | 1489  | noncoding | —       |
| MSTRG. 4250. 5 | 2986  | coding    | PF00631 |
| MSTRG. 4256. 1 | 3455  | coding    | PF04774 |
| MSTRG. 4256. 3 | 7198  | coding    | PF04774 |
| MSTRG. 4256. 2 | 7201  | coding    | PF04774 |
| MSTRG. 4256. 4 | 7356  | coding    | PF04774 |
| MSTRG. 4257. 1 | 378   | noncoding | —       |
| MSTRG. 4260. 3 | 2205  | noncoding | —       |
| MSTRG. 4260. 4 | 3833  | noncoding | —       |
| MSTRG. 4261. 3 | 4077  | noncoding | —       |
| MSTRG. 4261. 2 | 4018  | noncoding | —       |
| MSTRG. 4261. 4 | 3911  | noncoding | —       |
| MSTRG. 4262. 1 | 348   | noncoding | —       |
| MSTRG. 4293. 3 | 941   | coding    | PF00179 |
| MSTRG. 4293. 4 | 1323  | coding    | PF00179 |
| MSTRG. 4293. 5 | 1107  | coding    | PF00179 |
| MSTRG. 4293. 6 | 1161  | coding    | PF00179 |
| MSTRG. 4293. 7 | 1043  | coding    | PF00179 |
| MSTRG. 4296. 1 | 1111  | noncoding | —       |
| MSTRG. 4301. 2 | 2969  | coding    | PF02878 |
| MSTRG. 4301. 1 | 2822  | coding    | PF02878 |
| MSTRG. 4301. 3 | 2924  | coding    | PF02878 |
| MSTRG. 4301. 4 | 2483  | coding    | PF02878 |
| MSTRG. 4301. 5 | 2032  | coding    | PF02878 |
| MSTRG. 4301. 6 | 2860  | coding    | PF02878 |
| MSTRG. 4302. 1 | 2460  | noncoding | —       |
| MSTRG. 4303. 2 | 4891  | noncoding | —       |
| MSTRG. 4304. 2 | 1468  | coding    | PF06729 |
| MSTRG. 4297. 1 | 799   | noncoding | —       |
| MSTRG. 4298. 1 | 894   | noncoding | —       |
| MSTRG. 4312. 5 | 1450  | noncoding | —       |
| MSTRG. 4312. 4 | 7020  | coding    | PF06920 |
| MSTRG. 4312. 2 | 9709  | coding    | PF06920 |
| MSTRG. 4312. 1 | 15143 | coding    | PF06920 |
| MSTRG. 4312. 3 | 11509 | coding    | PF06920 |
| MSTRG. 4310. 2 | 2552  | noncoding | —       |
| MSTRG. 4317. 2 | 8555  | coding    | PF00859 |
| MSTRG. 4319. 1 | 23271 | noncoding | —       |
| MSTRG. 4319. 2 | 60402 | noncoding | —       |
| MSTRG. 4319. 3 | 9501  | coding    | PF00078 |
| MSTRG. 4319. 4 | 24222 | noncoding | —       |
| MSTRG. 4319. 5 | 1952  | noncoding | —       |
| MSTRG. 4325. 2 | 3448  | coding    | PF00067 |
| MSTRG. 4325. 3 | 823   | noncoding | —       |
| MSTRG. 4326. 2 | 1696  | noncoding | —       |

|                 |       |           |         |
|-----------------|-------|-----------|---------|
| MSTRG. 4328. 2  | 8106  | coding    | PF00067 |
| MSTRG. 4328. 6  | 5472  | coding    | PF00067 |
| MSTRG. 4328. 5  | 1443  | coding    | PF00067 |
| MSTRG. 4328. 7  | 1676  | coding    | PF00067 |
| MSTRG. 4328. 11 | 7757  | coding    | PF00067 |
| MSTRG. 4329. 3  | 5574  | coding    | PF05622 |
| MSTRG. 4330. 1  | 519   | noncoding | -       |
| MSTRG. 4335. 2  | 6217  | coding    | PF04433 |
| MSTRG. 4341. 1  | 1028  | noncoding | -       |
| MSTRG. 4341. 2  | 579   | noncoding | -       |
| MSTRG. 4341. 3  | 1079  | noncoding | -       |
| MSTRG. 4343. 1  | 3457  | noncoding | -       |
| MSTRG. 4344. 1  | 1772  | coding    | PF00078 |
| MSTRG. 4340. 1  | 421   | noncoding | -       |
| MSTRG. 4346. 2  | 3365  | noncoding | -       |
| MSTRG. 4345. 1  | 3128  | noncoding | -       |
| MSTRG. 4359. 2  | 10549 | coding    | PF00443 |
| MSTRG. 4357. 1  | 4134  | noncoding | -       |
| MSTRG. 4358. 2  | 1318  | noncoding | -       |
| MSTRG. 4360. 2  | 3906  | noncoding | -       |
| MSTRG. 4361. 1  | 4747  | noncoding | -       |
| MSTRG. 4361. 3  | 1797  | noncoding | -       |
| MSTRG. 4363. 1  | 3835  | coding    | PF10223 |
| MSTRG. 4363. 2  | 8114  | coding    | PF10223 |
| MSTRG. 4363. 3  | 2786  | noncoding | -       |
| MSTRG. 4367. 4  | 7030  | noncoding | -       |
| MSTRG. 4367. 5  | 40314 | noncoding | -       |
| MSTRG. 4369. 1  | 25459 | noncoding | -       |
| MSTRG. 4365. 2  | 523   | noncoding | -       |
| MSTRG. 4371. 1  | 1055  | coding    | PF12280 |
| MSTRG. 4371. 2  | 1035  | coding    | PF12280 |
| MSTRG. 4375. 1  | 971   | noncoding | -       |
| MSTRG. 4372. 2  | 4535  | coding    | PF09531 |
| MSTRG. 4382. 1  | 942   | noncoding | -       |
| MSTRG. 4388. 1  | 7138  | coding    | PF00058 |
| MSTRG. 4388. 3  | 7561  | noncoding | -       |
| MSTRG. 4388. 9  | 7177  | coding    | PF00058 |
| MSTRG. 4384. 2  | 767   | coding    | PF02792 |
| MSTRG. 4390. 1  | 2047  | noncoding | -       |
| MSTRG. 4390. 2  | 1610  | noncoding | -       |
| MSTRG. 4390. 3  | 1547  | noncoding | -       |
| MSTRG. 4399. 1  | 572   | noncoding | -       |
| MSTRG. 4400. 2  | 2298  | coding    | PF02036 |
| MSTRG. 4401. 2  | 10257 | noncoding | -       |
| MSTRG. 4401. 3  | 10085 | noncoding | -       |
| MSTRG. 4399. 3  | 1451  | coding    | PF00378 |
| MSTRG. 4401. 5  | 11743 | noncoding | -       |
| MSTRG. 4401. 8  | 11124 | noncoding | -       |
| MSTRG. 4401. 9  | 12847 | noncoding | -       |
| MSTRG. 4401. 11 | 10238 | noncoding | -       |
| MSTRG. 4401. 12 | 10301 | noncoding | -       |
| MSTRG. 4401. 10 | 12938 | noncoding | -       |
| MSTRG. 4401. 13 | 10437 | noncoding | -       |
| MSTRG. 4401. 14 | 10374 | noncoding | -       |

|                 |       |           |         |
|-----------------|-------|-----------|---------|
| MSTRG. 4401. 16 | 7520  | noncoding | -       |
| MSTRG. 4403. 1  | 2843  | noncoding | -       |
| MSTRG. 4403. 3  | 7094  | noncoding | -       |
| MSTRG. 4404. 1  | 2672  | noncoding | -       |
| MSTRG. 4408. 1  | 2370  | noncoding | -       |
| MSTRG. 4409. 2  | 3130  | coding    | PF01426 |
| MSTRG. 4409. 3  | 2671  | noncoding | -       |
| MSTRG. 4411. 1  | 10320 | noncoding | -       |
| MSTRG. 4411. 2  | 8836  | noncoding | -       |
| MSTRG. 4412. 1  | 4766  | coding    | PF11979 |
| MSTRG. 4412. 2  | 4582  | coding    | PF11979 |
| MSTRG. 4412. 3  | 4386  | coding    | PF11979 |
| MSTRG. 4413. 1  | 5657  | coding    | PF01849 |
| MSTRG. 4413. 2  | 3466  | coding    | PF01849 |
| MSTRG. 4413. 5  | 1108  | noncoding | -       |
| MSTRG. 4414. 2  | 1495  | coding    | PF13899 |
| MSTRG. 4418. 1  | 4176  | coding    | PF16187 |
| MSTRG. 4420. 9  | 5535  | coding    | PF01237 |
| MSTRG. 4420. 10 | 11231 | coding    | PF01237 |
| MSTRG. 4420. 11 | 5419  | coding    | PF01237 |
| MSTRG. 4421. 1  | 5550  | noncoding | -       |
| MSTRG. 4422. 1  | 359   | noncoding | -       |
| MSTRG. 4422. 2  | 346   | noncoding | -       |
| MSTRG. 4423. 4  | 3173  | coding    | PF12763 |
| MSTRG. 4423. 5  | 3930  | coding    | PF12763 |
| MSTRG. 4424. 1  | 255   | coding    | PF05071 |
| MSTRG. 4426. 4  | 2799  | coding    | PF10300 |
| MSTRG. 4428. 2  | 2232  | coding    | PF13639 |
| MSTRG. 4429. 1  | 1936  | noncoding | -       |
| MSTRG. 4431. 1  | 1648  | noncoding | -       |
| MSTRG. 4432. 2  | 1968  | coding    | PF12796 |
| MSTRG. 4434. 1  | 1995  | noncoding | -       |
| MSTRG. 4446. 2  | 989   | noncoding | -       |
| MSTRG. 4446. 1  | 1676  | noncoding | -       |
| MSTRG. 4446. 4  | 1684  | noncoding | -       |
| MSTRG. 4448. 1  | 28325 | coding    | PF03184 |
| MSTRG. 4448. 2  | 6046  | coding    | PF03184 |
| MSTRG. 4449. 1  | 6784  | noncoding | -       |
| MSTRG. 4450. 1  | 835   | noncoding | -       |
| MSTRG. 4451. 1  | 2684  | noncoding | -       |
| MSTRG. 4452. 1  | 2549  | noncoding | -       |
| MSTRG. 4454. 1  | 938   | noncoding | -       |
| MSTRG. 4456. 1  | 248   | noncoding | -       |
| MSTRG. 4443. 3  | 1192  | noncoding | -       |
| MSTRG. 4445. 1  | 3568  | noncoding | -       |
| MSTRG. 4462. 1  | 10178 | coding    | PF02337 |
| MSTRG. 4462. 2  | 12615 | coding    | PF02337 |
| MSTRG. 4463. 1  | 4867  | noncoding | -       |
| MSTRG. 4464. 1  | 970   | noncoding | -       |
| MSTRG. 4465. 1  | 304   | noncoding | -       |
| MSTRG. 4467. 4  | 4463  | noncoding | -       |
| MSTRG. 4470. 3  | 3630  | coding    | PF06644 |
| MSTRG. 4470. 4  | 3761  | coding    | PF06644 |
| MSTRG. 4470. 5  | 2230  | coding    | PF06644 |

|                 |       |           |         |
|-----------------|-------|-----------|---------|
| MSTRG. 4473. 3  | 2841  | coding    | PF00069 |
| MSTRG. 4471. 2  | 570   | noncoding | —       |
| MSTRG. 4471. 1  | 840   | noncoding | —       |
| MSTRG. 4474. 5  | 4474  | coding    | PF01425 |
| MSTRG. 4474. 4  | 3737  | coding    | PF01425 |
| MSTRG. 4474. 7  | 15197 | coding    | PF01425 |
| MSTRG. 4474. 8  | 9348  | coding    | PF01189 |
| MSTRG. 4474. 10 | 4745  | noncoding | —       |
| MSTRG. 4474. 12 | 4098  | noncoding | —       |
| MSTRG. 4474. 13 | 3517  | noncoding | —       |
| MSTRG. 4474. 14 | 3899  | noncoding | —       |
| MSTRG. 4474. 11 | 4795  | noncoding | —       |
| MSTRG. 4479. 6  | 1018  | coding    | PF02320 |
| MSTRG. 4479. 4  | 1576  | coding    | PF02320 |
| MSTRG. 4479. 7  | 1330  | coding    | PF02320 |
| MSTRG. 4479. 2  | 1879  | coding    | PF02320 |
| MSTRG. 4479. 1  | 624   | coding    | PF02320 |
| MSTRG. 4480. 2  | 2453  | noncoding | —       |
| MSTRG. 4481. 4  | 10153 | coding    | PF00176 |
| MSTRG. 4481. 5  | 12175 | coding    | PF00176 |
| MSTRG. 4481. 1  | 12065 | coding    | PF00176 |
| MSTRG. 4481. 2  | 11335 | coding    | PF00176 |
| MSTRG. 4477. 2  | 2997  | coding    | PF03071 |
| MSTRG. 4477. 3  | 3189  | coding    | PF03071 |
| MSTRG. 4477. 4  | 3050  | coding    | PF03071 |
| MSTRG. 4487. 1  | 4772  | coding    | PF16454 |
| MSTRG. 4488. 1  | 14126 | noncoding | —       |
| MSTRG. 4488. 2  | 7700  | noncoding | —       |
| MSTRG. 4488. 3  | 1556  | noncoding | —       |
| MSTRG. 4494. 1  | 15951 | noncoding | —       |
| MSTRG. 4495. 1  | 6450  | noncoding | —       |
| MSTRG. 4494. 8  | 3001  | noncoding | —       |
| MSTRG. 4494. 9  | 2030  | noncoding | —       |
| MSTRG. 4496. 1  | 2031  | noncoding | —       |
| MSTRG. 4494. 10 | 11302 | noncoding | —       |
| MSTRG. 4494. 11 | 7615  | noncoding | —       |
| MSTRG. 4498. 1  | 8408  | noncoding | —       |
| MSTRG. 4494. 12 | 2845  | coding    | PF15337 |
| MSTRG. 4494. 13 | 1827  | noncoding | —       |
| MSTRG. 4499. 3  | 1754  | noncoding | —       |
| MSTRG. 4483. 6  | 3492  | noncoding | —       |
| MSTRG. 4483. 4  | 6414  | noncoding | —       |
| MSTRG. 4483. 5  | 3306  | noncoding | —       |
| MSTRG. 4483. 3  | 3710  | noncoding | —       |
| MSTRG. 4503. 1  | 546   | noncoding | —       |
| MSTRG. 4504. 5  | 5273  | coding    | PF07714 |
| MSTRG. 4506. 1  | 473   | noncoding | —       |
| MSTRG. 4515. 1  | 4499  | coding    | PF12349 |
| MSTRG. 4516. 2  | 509   | noncoding | —       |
| MSTRG. 4516. 1  | 562   | noncoding | —       |
| MSTRG. 4520. 2  | 5089  | coding    | PF00225 |
| MSTRG. 4520. 4  | 4812  | coding    | PF00225 |
| MSTRG. 4521. 1  | 853   | noncoding | —       |
| MSTRG. 4533. 11 | 2131  | coding    | PF15926 |



|                 |      |           |         |
|-----------------|------|-----------|---------|
| MSTRG. 4533. 7  | 2021 | coding    | PF15926 |
| MSTRG. 4533. 10 | 1950 | coding    | PF15926 |
| MSTRG. 4533. 3  | 1847 | coding    | PF15926 |
| MSTRG. 4533. 1  | 2161 | coding    | PF15926 |
| MSTRG. 4533. 2  | 2083 | coding    | PF15926 |
| MSTRG. 4533. 4  | 2165 | coding    | PF15926 |
| MSTRG. 4533. 8  | 1957 | coding    | PF15926 |
| MSTRG. 4533. 6  | 1956 | coding    | PF15926 |
| MSTRG. 4533. 5  | 1778 | coding    | PF15926 |
| MSTRG. 4523. 3  | 1706 | coding    | PF00929 |
| MSTRG. 4523. 4  | 1543 | coding    | PF00929 |
| MSTRG. 4524. 1  | 6065 | noncoding | –       |
| MSTRG. 4525. 1  | 2100 | noncoding | –       |
| MSTRG. 4538. 1  | 492  | noncoding | –       |
| MSTRG. 4540. 1  | 781  | coding    | PF00209 |
| MSTRG. 4541. 2  | 1454 | coding    | PF15669 |
| MSTRG. 4549. 1  | 686  | noncoding | –       |
| MSTRG. 4552. 4  | 4189 | coding    | PF13832 |
| MSTRG. 4553. 1  | 3148 | noncoding | –       |
| MSTRG. 4543. 2  | 7212 | coding    | PF00102 |
| MSTRG. 4543. 3  | 8005 | coding    | PF00102 |
| MSTRG. 4562. 2  | 6993 | coding    | PF10232 |
| MSTRG. 4562. 3  | 4153 | coding    | PF10232 |
| MSTRG. 4564. 1  | 2217 | noncoding | –       |
| MSTRG. 4555. 2  | 4100 | noncoding | –       |
| MSTRG. 4557. 1  | 348  | noncoding | –       |
| MSTRG. 4559. 3  | 1214 | coding    | PF14886 |
| MSTRG. 4571. 1  | 2916 | coding    | PF13853 |
| MSTRG. 4572. 1  | 6422 | noncoding | –       |
| MSTRG. 4574. 1  | 1177 | noncoding | –       |
| MSTRG. 4578. 1  | 673  | coding    | PF15674 |
| MSTRG. 4578. 3  | 629  | coding    | PF15674 |
| MSTRG. 4579. 2  | 1048 | noncoding | –       |
| MSTRG. 4580. 2  | 1306 | coding    | PF10504 |
| MSTRG. 4592. 1  | 2223 | coding    | PF00160 |
| MSTRG. 4592. 2  | 1786 | coding    | PF00160 |
| MSTRG. 4594. 1  | 4929 | coding    | PF15742 |
| MSTRG. 4594. 2  | 4526 | coding    | PF15742 |
| MSTRG. 4594. 4  | 3902 | coding    | PF15742 |
| MSTRG. 4594. 6  | 2323 | coding    | PF15742 |
| MSTRG. 4594. 5  | 5073 | coding    | PF15742 |
| MSTRG. 4594. 7  | 9802 | coding    | PF15742 |
| MSTRG. 4595. 1  | 6305 | coding    | PF02994 |
| MSTRG. 4594. 9  | 9913 | noncoding | –       |
| MSTRG. 4594. 10 | 2687 | noncoding | –       |
| MSTRG. 4594. 11 | 2205 | noncoding | –       |
| MSTRG. 4585. 3  | 1971 | coding    | PF00250 |
| MSTRG. 4585. 4  | 526  | noncoding | –       |
| MSTRG. 4585. 5  | 4827 | coding    | PF00250 |
| MSTRG. 4583. 1  | 571  | coding    | PF02058 |
| MSTRG. 4588. 1  | 1024 | noncoding | –       |
| MSTRG. 4600. 1  | 9778 | noncoding | –       |
| MSTRG. 4600. 2  | 2909 | noncoding | –       |
| MSTRG. 4600. 3  | 3639 | noncoding | –       |

|                 |       |           |         |
|-----------------|-------|-----------|---------|
| MSTRG. 4601. 3  | 3312  | coding    | PF12140 |
| MSTRG. 4601. 4  | 3455  | coding    | PF12140 |
| MSTRG. 4602. 1  | 4597  | noncoding | —       |
| MSTRG. 4603. 1  | 1334  | noncoding | —       |
| MSTRG. 4601. 8  | 2596  | noncoding | —       |
| MSTRG. 4601. 9  | 1744  | noncoding | —       |
| MSTRG. 4604. 1  | 6088  | noncoding | —       |
| MSTRG. 4604. 3  | 1687  | noncoding | —       |
| MSTRG. 4605. 7  | 1428  | noncoding | —       |
| MSTRG. 4605. 8  | 4319  | noncoding | —       |
| MSTRG. 4605. 4  | 1691  | noncoding | —       |
| MSTRG. 4605. 6  | 2183  | noncoding | —       |
| MSTRG. 4605. 9  | 1302  | noncoding | —       |
| MSTRG. 4605. 10 | 4583  | noncoding | —       |
| MSTRG. 4608. 3  | 353   | noncoding | —       |
| MSTRG. 4608. 6  | 2166  | noncoding | —       |
| MSTRG. 4609. 2  | 3855  | coding    | PF01352 |
| MSTRG. 4609. 1  | 6909  | coding    | PF01352 |
| MSTRG. 4611. 1  | 229   | noncoding | —       |
| MSTRG. 4615. 2  | 458   | coding    | PF15844 |
| MSTRG. 4616. 2  | 6152  | noncoding | —       |
| MSTRG. 4617. 1  | 16053 | noncoding | —       |
| MSTRG. 4618. 1  | 3389  | noncoding | —       |
| MSTRG. 4616. 3  | 2085  | noncoding | —       |
| MSTRG. 4627. 9  | 3008  | coding    | PF01213 |
| MSTRG. 4627. 10 | 2657  | coding    | PF01213 |
| MSTRG. 4627. 7  | 2660  | coding    | PF01213 |
| MSTRG. 4620. 2  | 3127  | coding    | PF01715 |
| MSTRG. 4632. 3  | 3531  | noncoding | —       |
| MSTRG. 4634. 9  | 3107  | coding    | PF00658 |
| MSTRG. 4634. 10 | 1724  | coding    | PF00076 |
| MSTRG. 4634. 13 | 1824  | coding    | PF00658 |
| MSTRG. 4706. 9  | 13984 | coding    | PF02187 |
| MSTRG. 4706. 6  | 17442 | coding    | PF02187 |
| MSTRG. 4706. 4  | 17385 | coding    | PF02187 |
| MSTRG. 4706. 27 | 11242 | coding    | PF02187 |
| MSTRG. 4706. 18 | 15399 | coding    | PF02187 |
| MSTRG. 4706. 25 | 20787 | coding    | PF02187 |
| MSTRG. 4706. 19 | 23164 | coding    | PF02187 |
| MSTRG. 4706. 12 | 30801 | coding    | PF02187 |
| MSTRG. 4706. 14 | 44413 | coding    | PF02187 |
| MSTRG. 4706. 24 | 18709 | coding    | PF02187 |
| MSTRG. 4706. 16 | 23388 | coding    | PF02187 |
| MSTRG. 4706. 15 | 23272 | coding    | PF02187 |
| MSTRG. 4706. 30 | 13445 | noncoding | —       |
| MSTRG. 4706. 31 | 1658  | noncoding | —       |
| MSTRG. 4706. 32 | 6555  | noncoding | —       |
| MSTRG. 4706. 33 | 50619 | noncoding | —       |
| MSTRG. 4648. 1  | 1878  | noncoding | —       |
| MSTRG. 4649. 1  | 1117  | noncoding | —       |
| MSTRG. 4649. 2  | 1026  | noncoding | —       |
| MSTRG. 4651. 1  | 1673  | noncoding | —       |
| MSTRG. 4660. 3  | 3118  | noncoding | —       |
| MSTRG. 4654. 1  | 2845  | coding    | PF15855 |

|                 |      |           |         |
|-----------------|------|-----------|---------|
| MSTRG. 4654. 2  | 2986 | coding    | PF15855 |
| MSTRG. 4666. 1  | 2699 | coding    | PF10211 |
| MSTRG. 4673. 2  | 2171 | coding    | PF10188 |
| MSTRG. 4673. 3  | 1590 | coding    | PF10188 |
| MSTRG. 4675. 2  | 3169 | coding    | PF00069 |
| MSTRG. 4679. 3  | 2291 | coding    | PF07653 |
| MSTRG. 4679. 2  | 2309 | coding    | PF14604 |
| MSTRG. 4679. 5  | 1825 | noncoding | –       |
| MSTRG. 4680. 6  | 4299 | coding    | PF15440 |
| MSTRG. 4680. 7  | 9427 | noncoding | –       |
| MSTRG. 4680. 8  | 3350 | noncoding | –       |
| MSTRG. 4677. 1  | 1722 | coding    | PF04051 |
| MSTRG. 4677. 4  | 1843 | coding    | PF04051 |
| MSTRG. 4682. 1  | 1778 | noncoding | –       |
| MSTRG. 4682. 2  | 1206 | noncoding | –       |
| MSTRG. 4687. 1  | 2343 | coding    | PF03148 |
| MSTRG. 4687. 5  | 2080 | coding    | PF03148 |
| MSTRG. 4687. 4  | 2019 | coding    | PF03148 |
| MSTRG. 4689. 1  | 8850 | coding    | PF02171 |
| MSTRG. 4689. 2  | 8186 | coding    | PF02171 |
| MSTRG. 4691. 1  | 432  | noncoding | –       |
| MSTRG. 4692. 2  | 3369 | coding    | PF05536 |
| MSTRG. 4698. 1  | 1774 | noncoding | –       |
| MSTRG. 4700. 1  | 6070 | noncoding | –       |
| MSTRG. 4701. 1  | 4573 | noncoding | –       |
| MSTRG. 4703. 2  | 5559 | coding    | PF14291 |
| MSTRG. 4703. 1  | 3961 | noncoding | –       |
| MSTRG. 4703. 3  | 2030 | noncoding | –       |
| MSTRG. 4704. 1  | 1738 | noncoding | –       |
| MSTRG. 4703. 4  | 5349 | coding    | PF14291 |
| MSTRG. 4718. 3  | 1415 | noncoding | –       |
| MSTRG. 4718. 6  | 5826 | noncoding | –       |
| MSTRG. 4718. 8  | 2822 | noncoding | –       |
| MSTRG. 4705. 2  | 1279 | coding    | PF15990 |
| MSTRG. 4709. 2  | 1028 | noncoding | –       |
| MSTRG. 4709. 1  | 799  | noncoding | –       |
| MSTRG. 4711. 4  | 3339 | coding    | PF02023 |
| MSTRG. 4711. 5  | 3312 | coding    | PF02023 |
| MSTRG. 4711. 6  | 3328 | coding    | PF02023 |
| MSTRG. 4710. 1  | 2186 | noncoding | –       |
| MSTRG. 4725. 1  | 5869 | coding    | PF02213 |
| MSTRG. 4725. 2  | 7017 | coding    | PF02213 |
| MSTRG. 4725. 12 | 647  | noncoding | –       |
| MSTRG. 4725. 10 | 5628 | coding    | PF02213 |
| MSTRG. 4725. 11 | 7325 | coding    | PF02213 |
| MSTRG. 4725. 9  | 6870 | coding    | PF02213 |
| MSTRG. 4725. 13 | 7147 | coding    | PF02213 |
| MSTRG. 4725. 16 | 7054 | coding    | PF02213 |
| MSTRG. 4725. 17 | 4943 | coding    | PF02213 |
| MSTRG. 4725. 18 | 4985 | coding    | PF02213 |
| MSTRG. 4725. 19 | 6163 | coding    | PF02213 |
| MSTRG. 4725. 20 | 6226 | coding    | PF02213 |
| MSTRG. 4725. 21 | 6053 | coding    | PF02213 |
| MSTRG. 4725. 22 | 4961 | coding    | PF02213 |

|                |       |           |         |
|----------------|-------|-----------|---------|
| MSTRG. 4722. 3 | 4744  | noncoding | -       |
| MSTRG. 4729. 1 | 854   | coding    | PF00201 |
| MSTRG. 4734. 4 | 2962  | noncoding | -       |
| MSTRG. 4734. 5 | 3295  | noncoding | -       |
| MSTRG. 4735. 1 | 825   | noncoding | -       |
| MSTRG. 4735. 2 | 2390  | noncoding | -       |
| MSTRG. 4730. 1 | 596   | noncoding | -       |
| MSTRG. 4731. 1 | 772   | noncoding | -       |
| MSTRG. 4738. 1 | 569   | noncoding | -       |
| MSTRG. 4741. 2 | 7133  | noncoding | -       |
| MSTRG. 4744. 1 | 3928  | noncoding | -       |
| MSTRG. 4746. 1 | 799   | noncoding | -       |
| MSTRG. 4747. 3 | 11286 | coding    | PF01412 |
| MSTRG. 4750. 1 | 377   | noncoding | -       |
| MSTRG. 4751. 1 | 668   | noncoding | -       |
| MSTRG. 4754. 1 | 2877  | coding    | PF00004 |
| MSTRG. 4754. 4 | 2759  | coding    | PF00004 |
| MSTRG. 4754. 5 | 1659  | coding    | PF00004 |
| MSTRG. 4754. 6 | 2990  | coding    | PF00004 |
| MSTRG. 4754. 7 | 1977  | coding    | PF00004 |
| MSTRG. 4752. 1 | 1788  | noncoding | -       |
| MSTRG. 4757. 1 | 7550  | noncoding | -       |
| MSTRG. 4758. 2 | 1622  | coding    | PF10075 |
| MSTRG. 4758. 3 | 1382  | coding    | PF10075 |
| MSTRG. 4761. 1 | 9094  | coding    | PF00092 |
| MSTRG. 4761. 3 | 8905  | coding    | PF00092 |
| MSTRG. 4761. 5 | 8755  | coding    | PF00092 |
| MSTRG. 4762. 1 | 765   | noncoding | -       |
| MSTRG. 4763. 1 | 10596 | coding    | PF00071 |
| MSTRG. 4767. 2 | 5213  | noncoding | -       |
| MSTRG. 4768. 1 | 1469  | noncoding | -       |
| MSTRG. 4767. 6 | 2023  | coding    | PF09738 |
| MSTRG. 4769. 1 | 3712  | noncoding | -       |
| MSTRG. 4767. 7 | 10996 | coding    | PF09738 |
| MSTRG. 4772. 2 | 5680  | noncoding | -       |
| MSTRG. 4766. 1 | 711   | noncoding | -       |
| MSTRG. 4766. 2 | 816   | noncoding | -       |
| MSTRG. 4766. 3 | 673   | noncoding | -       |
| MSTRG. 4774. 3 | 1330  | coding    | PF00266 |
| MSTRG. 4774. 2 | 1491  | coding    | PF00266 |
| MSTRG. 4781. 2 | 6759  | coding    | PF12114 |
| MSTRG. 4785. 3 | 2805  | coding    | PF10243 |
| MSTRG. 4785. 6 | 5226  | coding    | PF10243 |
| MSTRG. 4782. 1 | 7010  | coding    | PF12796 |
| MSTRG. 4782. 3 | 6612  | coding    | PF12796 |
| MSTRG. 4787. 1 | 8756  | coding    | PF00850 |
| MSTRG. 4787. 2 | 6636  | coding    | PF00850 |
| MSTRG. 4787. 3 | 4956  | coding    | PF00850 |
| MSTRG. 4788. 1 | 1647  | noncoding | -       |
| MSTRG. 4789. 1 | 991   | noncoding | -       |
| MSTRG. 4796. 1 | 4545  | coding    | PF09240 |
| MSTRG. 4800. 2 | 2094  | noncoding | -       |
| MSTRG. 4811. 1 | 2696  | noncoding | -       |
| MSTRG. 4811. 3 | 2461  | noncoding | -       |

|                 |       |           |         |
|-----------------|-------|-----------|---------|
| MSTRG. 4813. 1  | 7790  | coding    | PF00225 |
| MSTRG. 4814. 1  | 7159  | noncoding | –       |
| MSTRG. 4815. 1  | 514   | noncoding | –       |
| MSTRG. 4826. 4  | 1552  | noncoding | –       |
| MSTRG. 4826. 5  | 1679  | noncoding | –       |
| MSTRG. 4826. 2  | 2136  | noncoding | –       |
| MSTRG. 4826. 3  | 5877  | coding    | PF00069 |
| MSTRG. 4826. 10 | 4950  | coding    | PF00069 |
| MSTRG. 4816. 1  | 1268  | noncoding | –       |
| MSTRG. 4818. 1  | 2993  | coding    | PF00735 |
| MSTRG. 4818. 2  | 3696  | coding    | PF00735 |
| MSTRG. 4818. 4  | 3321  | coding    | PF00735 |
| MSTRG. 4819. 1  | 434   | noncoding | –       |
| MSTRG. 4830. 2  | 2244  | coding    | PF09380 |
| MSTRG. 4831. 4  | 1735  | coding    | PF00069 |
| MSTRG. 4831. 5  | 1671  | coding    | PF00069 |
| MSTRG. 4836. 1  | 2638  | coding    | PF02913 |
| MSTRG. 4836. 2  | 2535  | coding    | PF02913 |
| MSTRG. 4843. 1  | 286   | noncoding | –       |
| MSTRG. 4844. 1  | 232   | noncoding | –       |
| MSTRG. 4848. 1  | 703   | noncoding | –       |
| MSTRG. 4849. 1  | 1968  | noncoding | –       |
| MSTRG. 4860. 1  | 1799  | noncoding | –       |
| MSTRG. 4861. 1  | 1499  | coding    | PF09469 |
| MSTRG. 4861. 2  | 5086  | coding    | PF09469 |
| MSTRG. 4870. 1  | 589   | noncoding | –       |
| MSTRG. 4876. 1  | 1728  | coding    | PF07354 |
| MSTRG. 4877. 1  | 2621  | noncoding | –       |
| MSTRG. 4882. 1  | 1272  | noncoding | –       |
| MSTRG. 4882. 2  | 1288  | noncoding | –       |
| MSTRG. 4873. 1  | 917   | noncoding | –       |
| MSTRG. 4886. 1  | 2961  | coding    | PF00005 |
| MSTRG. 4887. 1  | 4175  | coding    | PF00005 |
| MSTRG. 4887. 2  | 2445  | coding    | PF00005 |
| MSTRG. 4895. 2  | 3962  | coding    | PF00069 |
| MSTRG. 4903. 1  | 662   | noncoding | –       |
| MSTRG. 4903. 2  | 2669  | coding    | PF02536 |
| MSTRG. 4921. 2  | 12812 | coding    | PF10495 |
| MSTRG. 4921. 3  | 11889 | coding    | PF10495 |
| MSTRG. 4922. 2  | 1419  | coding    | PF00067 |
| MSTRG. 4924. 1  | 1464  | noncoding | –       |
| MSTRG. 4925. 1  | 818   | noncoding | –       |
| MSTRG. 4928. 3  | 5461  | noncoding | –       |
| MSTRG. 4928. 4  | 3741  | noncoding | –       |
| MSTRG. 4929. 1  | 4115  | noncoding | –       |
| MSTRG. 4928. 6  | 505   | noncoding | –       |
| MSTRG. 4930. 1  | 5370  | coding    | PF00078 |
| MSTRG. 4928. 7  | 4539  | noncoding | –       |
| MSTRG. 4912. 2  | 1343  | noncoding | –       |
| MSTRG. 4913. 1  | 3173  | noncoding | –       |
| MSTRG. 4913. 3  | 5062  | noncoding | –       |
| MSTRG. 4913. 4  | 5603  | noncoding | –       |
| MSTRG. 4920. 1  | 466   | noncoding | –       |
| MSTRG. 4942. 1  | 451   | noncoding | –       |

|                 |       |           |         |
|-----------------|-------|-----------|---------|
| MSTRG. 4950. 1  | 1196  | noncoding | -       |
| MSTRG. 4951. 2  | 3316  | noncoding | -       |
| MSTRG. 4953. 1  | 1402  | coding    | PF16297 |
| MSTRG. 4961. 1  | 10354 | coding    | PF07647 |
| MSTRG. 4961. 7  | 7744  | coding    | PF07647 |
| MSTRG. 4961. 4  | 10120 | coding    | PF07647 |
| MSTRG. 4961. 5  | 10100 | coding    | PF07647 |
| MSTRG. 4961. 6  | 8455  | coding    | PF07647 |
| MSTRG. 4961. 10 | 10337 | coding    | PF07647 |
| MSTRG. 4961. 8  | 10393 | coding    | PF07647 |
| MSTRG. 4961. 9  | 10391 | coding    | PF07647 |
| MSTRG. 4961. 12 | 2572  | noncoding | -       |
| MSTRG. 4961. 11 | 9559  | coding    | PF07647 |
| MSTRG. 4961. 13 | 10323 | coding    | PF07647 |
| MSTRG. 4961. 15 | 10186 | coding    | PF07647 |
| MSTRG. 4961. 14 | 10298 | coding    | PF07647 |
| MSTRG. 4962. 1  | 2006  | noncoding | -       |
| MSTRG. 4963. 1  | 2256  | noncoding | -       |
| MSTRG. 4964. 1  | 8243  | noncoding | -       |
| MSTRG. 4965. 1  | 9619  | noncoding | -       |
| MSTRG. 4965. 2  | 4819  | noncoding | -       |
| MSTRG. 4965. 3  | 3053  | noncoding | -       |
| MSTRG. 4966. 1  | 225   | noncoding | -       |
| MSTRG. 4967. 1  | 1793  | noncoding | -       |
| MSTRG. 4961. 17 | 3919  | noncoding | -       |
| MSTRG. 4955. 1  | 1276  | noncoding | -       |
| MSTRG. 4956. 1  | 280   | noncoding | -       |
| MSTRG. 4959. 3  | 3051  | coding    | PF00153 |
| MSTRG. 4960. 1  | 540   | noncoding | -       |
| MSTRG. 4975. 2  | 958   | noncoding | -       |
| MSTRG. 4980. 10 | 2051  | coding    | PF00733 |
| MSTRG. 4980. 4  | 2788  | coding    | PF00733 |
| MSTRG. 4980. 9  | 1935  | coding    | PF00733 |
| MSTRG. 4980. 8  | 2277  | coding    | PF00733 |
| MSTRG. 4980. 5  | 2127  | coding    | PF00733 |
| MSTRG. 4980. 2  | 2306  | coding    | PF00733 |
| MSTRG. 4981. 2  | 5990  | noncoding | -       |
| MSTRG. 4985. 6  | 4422  | coding    | PF17034 |
| MSTRG. 4985. 8  | 1630  | coding    | PF17034 |
| MSTRG. 4990. 3  | 16036 | noncoding | -       |
| MSTRG. 4990. 4  | 1043  | noncoding | -       |
| MSTRG. 4991. 1  | 7490  | noncoding | -       |
| MSTRG. 4998. 3  | 3796  | coding    | PF15388 |
| MSTRG. 4998. 4  | 6751  | coding    | PF15388 |
| MSTRG. 4998. 5  | 6748  | coding    | PF15388 |
| MSTRG. 4998. 6  | 5448  | coding    | PF15388 |
| MSTRG. 4998. 7  | 793   | noncoding | -       |
| MSTRG. 4988. 6  | 1661  | coding    | PF06456 |
| MSTRG. 5003. 1  | 680   | noncoding | -       |
| MSTRG. 5020. 1  | 495   | noncoding | -       |
| MSTRG. 5021. 2  | 6109  | coding    | PF07092 |
| MSTRG. 5046. 1  | 637   | noncoding | -       |
| MSTRG. 5052. 1  | 2744  | noncoding | -       |
| MSTRG. 5077. 2  | 2276  | coding    | PF04621 |

|                 |       |           |         |
|-----------------|-------|-----------|---------|
| MSTRG. 5077. 3  | 2210  | coding    | PF04621 |
| MSTRG. 5078. 1  | 448   | noncoding | –       |
| MSTRG. 5106. 1  | 410   | noncoding | –       |
| MSTRG. 5095. 2  | 931   | noncoding | –       |
| MSTRG. 5137. 1  | 11272 | coding    | PF00078 |
| MSTRG. 5138. 1  | 569   | noncoding | –       |
| MSTRG. 5137. 3  | 2845  | noncoding | –       |
| MSTRG. 5137. 2  | 12163 | noncoding | –       |
| MSTRG. 5137. 4  | 3498  | noncoding | –       |
| MSTRG. 5137. 5  | 3280  | noncoding | –       |
| MSTRG. 5137. 6  | 1418  | noncoding | –       |
| MSTRG. 5140. 2  | 762   | noncoding | –       |
| MSTRG. 5137. 7  | 3315  | noncoding | –       |
| MSTRG. 5137. 8  | 3279  | noncoding | –       |
| MSTRG. 5137. 10 | 1259  | noncoding | –       |
| MSTRG. 5133. 1  | 3560  | coding    | PF08628 |
| MSTRG. 5133. 3  | 6448  | coding    | PF08628 |
| MSTRG. 5133. 4  | 2151  | noncoding | –       |
| MSTRG. 5134. 1  | 2177  | noncoding | –       |
| MSTRG. 5135. 1  | 3290  | noncoding | –       |
| MSTRG. 5160. 1  | 5343  | noncoding | –       |
| MSTRG. 5192. 2  | 2903  | coding    | PF00850 |
| MSTRG. 5192. 1  | 2992  | coding    | PF00850 |
| MSTRG. 5192. 3  | 807   | coding    | PF00850 |
| MSTRG. 5192. 4  | 371   | noncoding | –       |
| MSTRG. 5196. 1  | 590   | noncoding | –       |
| MSTRG. 5201. 1  | 394   | noncoding | –       |
| MSTRG. 5209. 1  | 392   | noncoding | –       |
| MSTRG. 5236. 1  | 17583 | coding    | PF03028 |
| MSTRG. 5236. 3  | 14323 | coding    | PF03028 |
| MSTRG. 5237. 1  | 4180  | noncoding | –       |
| MSTRG. 5236. 6  | 9360  | coding    | PF03028 |
| MSTRG. 5238. 5  | 1986  | coding    | PF10497 |
| MSTRG. 5217. 3  | 6802  | coding    | PF00617 |
| MSTRG. 5217. 4  | 2225  | coding    | PF00617 |
| MSTRG. 5218. 1  | 3968  | noncoding | –       |
| MSTRG. 5226. 1  | 4973  | noncoding | –       |
| MSTRG. 5247. 1  | 4346  | coding    | PF09790 |
| MSTRG. 5249. 2  | 4447  | coding    | PF00651 |
| MSTRG. 5249. 3  | 1590  | coding    | PF00651 |
| MSTRG. 5249. 4  | 4579  | coding    | PF00651 |
| MSTRG. 5250. 1  | 620   | noncoding | –       |
| MSTRG. 5250. 2  | 7994  | noncoding | –       |
| MSTRG. 5232. 1  | 3443  | noncoding | –       |
| MSTRG. 5240. 3  | 2764  | coding    | PF02410 |
| MSTRG. 5252. 4  | 7232  | coding    | PF00076 |
| MSTRG. 5252. 3  | 1975  | coding    | PF00076 |
| MSTRG. 5252. 10 | 2147  | coding    | PF00076 |
| MSTRG. 5256. 1  | 1053  | noncoding | –       |
| MSTRG. 5257. 1  | 7802  | coding    | PF15027 |
| MSTRG. 5257. 3  | 3649  | noncoding | –       |
| MSTRG. 5257. 5  | 7925  | coding    | PF15027 |
| MSTRG. 5257. 6  | 3927  | coding    | PF15027 |
| MSTRG. 5258. 1  | 1786  | noncoding | –       |

|                |       |           |         |
|----------------|-------|-----------|---------|
| MSTRG. 5260. 1 | 1940  | coding    | PF00078 |
| MSTRG. 5261. 4 | 2263  | noncoding | –       |
| MSTRG. 5261. 5 | 1829  | coding    | PF07535 |
| MSTRG. 5265. 1 | 1709  | noncoding | –       |
| MSTRG. 5254. 1 | 580   | coding    | PF00664 |
| MSTRG. 5285. 2 | 3649  | coding    | PF00664 |
| MSTRG. 5285. 3 | 3739  | coding    | PF00664 |
| MSTRG. 5285. 4 | 3289  | coding    | PF00664 |
| MSTRG. 5286. 1 | 1856  | noncoding | –       |
| MSTRG. 5285. 5 | 2911  | coding    | PF00664 |
| MSTRG. 5288. 2 | 6939  | coding    | PF00005 |
| MSTRG. 5289. 1 | 5178  | noncoding | –       |
| MSTRG. 5293. 1 | 2211  | coding    | PF00755 |
| MSTRG. 5297. 5 | 2319  | noncoding | –       |
| MSTRG. 5298. 1 | 6027  | noncoding | –       |
| MSTRG. 5297. 6 | 5386  | noncoding | –       |
| MSTRG. 5297. 7 | 499   | noncoding | –       |
| MSTRG. 5297. 8 | 606   | noncoding | –       |
| MSTRG. 5299. 3 | 1136  | noncoding | –       |
| MSTRG. 5300. 1 | 1686  | noncoding | –       |
| MSTRG. 5301. 1 | 3737  | noncoding | –       |
| MSTRG. 5301. 2 | 1935  | noncoding | –       |
| MSTRG. 5301. 4 | 3762  | noncoding | –       |
| MSTRG. 5301. 8 | 4569  | noncoding | –       |
| MSTRG. 5301. 7 | 3540  | noncoding | –       |
| MSTRG. 5301. 3 | 3648  | noncoding | –       |
| MSTRG. 5301. 6 | 3696  | noncoding | –       |
| MSTRG. 5301. 5 | 4054  | noncoding | –       |
| MSTRG. 5305. 1 | 18955 | noncoding | –       |
| MSTRG. 5305. 2 | 2600  | noncoding | –       |
| MSTRG. 5306. 1 | 2876  | noncoding | –       |
| MSTRG. 5307. 1 | 1464  | noncoding | –       |
| MSTRG. 5271. 1 | 232   | noncoding | –       |
| MSTRG. 5275. 1 | 2697  | noncoding | –       |
| MSTRG. 5275. 2 | 2697  | noncoding | –       |
| MSTRG. 5276. 2 | 4794  | coding    | PF01403 |
| MSTRG. 5283. 2 | 7622  | coding    | PF08473 |
| MSTRG. 5283. 3 | 1245  | noncoding | –       |
| MSTRG. 5284. 1 | 2514  | coding    | PF00078 |
| MSTRG. 5310. 2 | 3703  | coding    | PF00089 |
| MSTRG. 5310. 3 | 2776  | coding    | PF00089 |
| MSTRG. 5312. 1 | 1500  | noncoding | –       |
| MSTRG. 5317. 1 | 3712  | noncoding | –       |
| MSTRG. 5324. 1 | 2214  | noncoding | –       |
| MSTRG. 5324. 2 | 3815  | coding    | PF00595 |
| MSTRG. 5324. 3 | 1255  | noncoding | –       |
| MSTRG. 5331. 1 | 6251  | noncoding | –       |
| MSTRG. 5358. 2 | 2462  | noncoding | –       |
| MSTRG. 5359. 2 | 1760  | noncoding | –       |
| MSTRG. 5359. 3 | 2634  | noncoding | –       |
| MSTRG. 5363. 2 | 6094  | coding    | PF04826 |
| MSTRG. 5363. 4 | 6065  | coding    | PF04826 |
| MSTRG. 5363. 5 | 16144 | coding    | PF04826 |
| MSTRG. 5365. 2 | 3074  | coding    | PF00675 |



|               |       |           |         |
|---------------|-------|-----------|---------|
| MSTRG. 5354.2 | 10254 | noncoding | -       |
| MSTRG. 5354.3 | 1868  | noncoding | -       |
| MSTRG. 5370.2 | 1541  | coding    | PF14630 |
| MSTRG. 5382.1 | 1347  | noncoding | -       |
| MSTRG. 5384.1 | 4441  | noncoding | -       |
| MSTRG. 5383.7 | 4084  | noncoding | -       |
| MSTRG. 5385.2 | 5402  | noncoding | -       |
| MSTRG. 5386.1 | 7133  | coding    | PF00069 |
| MSTRG. 5386.3 | 5435  | coding    | PF00069 |
| MSTRG. 5386.4 | 2285  | coding    | PF00069 |
| MSTRG. 5386.5 | 2349  | coding    | PF00069 |
| MSTRG. 5386.7 | 2442  | coding    | PF00069 |
| MSTRG. 5386.9 | 652   | noncoding | -       |
| MSTRG. 5387.1 | 6983  | noncoding | -       |
| MSTRG. 5388.1 | 11313 | noncoding | -       |
| MSTRG. 5389.1 | 6218  | noncoding | -       |
| MSTRG. 5391.1 | 3290  | noncoding | -       |
| MSTRG. 5377.3 | 5132  | coding    | PF08313 |
| MSTRG. 5377.2 | 5168  | coding    | PF08313 |
| MSTRG. 5377.1 | 5505  | coding    | PF08313 |
| MSTRG. 5392.1 | 4538  | coding    | PF04095 |
| MSTRG. 5392.2 | 3404  | coding    | PF04095 |
| MSTRG. 5393.2 | 4599  | coding    | PF15374 |
| MSTRG. 5401.3 | 1064  | noncoding | -       |
| MSTRG. 5401.2 | 1317  | noncoding | -       |
| MSTRG. 5401.1 | 604   | noncoding | -       |
| MSTRG. 5402.3 | 3087  | coding    | PF08517 |
| MSTRG. 5402.4 | 3959  | noncoding | -       |
| MSTRG. 5403.1 | 424   | noncoding | -       |
| MSTRG. 5404.2 | 4952  | noncoding | -       |
| MSTRG. 5404.1 | 10759 | noncoding | -       |
| MSTRG. 5404.3 | 6024  | noncoding | -       |
| MSTRG. 5405.1 | 699   | noncoding | -       |
| MSTRG. 5404.4 | 812   | noncoding | -       |
| MSTRG. 5408.4 | 1052  | coding    | PF05529 |
| MSTRG. 5399.1 | 2055  | noncoding | -       |
| MSTRG. 5399.2 | 2029  | noncoding | -       |
| MSTRG. 5412.1 | 3753  | noncoding | -       |
| MSTRG. 5413.2 | 5623  | coding    | PF00055 |
| MSTRG. 5414.1 | 218   | noncoding | -       |
| MSTRG. 5416.3 | 3812  | noncoding | -       |
| MSTRG. 5417.1 | 745   | noncoding | -       |
| MSTRG. 5419.7 | 2465  | coding    | PF00334 |
| MSTRG. 5419.6 | 7888  | coding    | PF00334 |
| MSTRG. 5419.8 | 3049  | coding    | PF00334 |
| MSTRG. 5440.1 | 483   | noncoding | -       |
| MSTRG. 5445.2 | 1467  | coding    | PF04184 |
| MSTRG. 5491.1 | 2099  | noncoding | -       |
| MSTRG. 5493.1 | 735   | noncoding | -       |
| MSTRG. 5493.2 | 2658  | noncoding | -       |
| MSTRG. 5470.2 | 3495  | coding    | PF01359 |
| MSTRG. 5471.1 | 1922  | noncoding | -       |
| MSTRG. 5478.3 | 1606  | coding    | PF05004 |
| MSTRG. 5480.1 | 1546  | coding    | PF12756 |

|                |       |           |         |
|----------------|-------|-----------|---------|
| MSTRG. 5514. 1 | 6000  | coding    | PF06920 |
| MSTRG. 5515. 1 | 362   | noncoding | —       |
| MSTRG. 5558. 2 | 7634  | noncoding | —       |
| MSTRG. 5560. 1 | 2993  | noncoding | —       |
| MSTRG. 5561. 1 | 1509  | noncoding | —       |
| MSTRG. 5561. 2 | 1360  | noncoding | —       |
| MSTRG. 5562. 1 | 6840  | noncoding | —       |
| MSTRG. 5563. 1 | 4051  | noncoding | —       |
| MSTRG. 5564. 1 | 1691  | noncoding | —       |
| MSTRG. 5565. 1 | 857   | noncoding | —       |
| MSTRG. 5558. 3 | 699   | noncoding | —       |
| MSTRG. 5532. 1 | 8488  | coding    | PF00226 |
| MSTRG. 5533. 1 | 1364  | coding    | PF05485 |
| MSTRG. 5533. 2 | 2665  | coding    | PF05485 |
| MSTRG. 5539. 1 | 834   | noncoding | —       |
| MSTRG. 5540. 1 | 3328  | noncoding | —       |
| MSTRG. 5538. 4 | 1946  | noncoding | —       |
| MSTRG. 5543. 1 | 9345  | noncoding | —       |
| MSTRG. 5543. 4 | 2693  | noncoding | —       |
| MSTRG. 5543. 2 | 3801  | noncoding | —       |
| MSTRG. 5543. 3 | 3384  | noncoding | —       |
| MSTRG. 5543. 7 | 3560  | noncoding | —       |
| MSTRG. 5543. 8 | 6256  | noncoding | —       |
| MSTRG. 5543. 9 | 7960  | noncoding | —       |
| MSTRG. 5549. 1 | 413   | noncoding | —       |
| MSTRG. 5550. 2 | 2442  | coding    | PF10034 |
| MSTRG. 5552. 1 | 1037  | noncoding | —       |
| MSTRG. 5555. 4 | 1848  | coding    | PF10034 |
| MSTRG. 5555. 2 | 4540  | coding    | PF10034 |
| MSTRG. 5555. 3 | 3435  | coding    | PF10034 |
| MSTRG. 5570. 2 | 2094  | coding    | PF14728 |
| MSTRG. 5570. 4 | 2150  | coding    | PF14728 |
| MSTRG. 5572. 2 | 998   | noncoding | —       |
| MSTRG. 5574. 5 | 2471  | coding    | PF00254 |
| MSTRG. 5574. 6 | 3043  | coding    | PF00254 |
| MSTRG. 5574. 7 | 1848  | noncoding | —       |
| MSTRG. 5575. 3 | 4179  | coding    | PF00651 |
| MSTRG. 5575. 4 | 3647  | coding    | PF00651 |
| MSTRG. 5584. 1 | 1956  | noncoding | —       |
| MSTRG. 5591. 1 | 6724  | coding    | PF00002 |
| MSTRG. 5591. 2 | 6757  | coding    | PF00002 |
| MSTRG. 5595. 3 | 1306  | noncoding | —       |
| MSTRG. 5594. 1 | 753   | noncoding | —       |
| MSTRG. 5605. 2 | 1771  | coding    | PF13639 |
| MSTRG. 5606. 2 | 865   | coding    | PF01359 |
| MSTRG. 5608. 1 | 796   | noncoding | —       |
| MSTRG. 5610. 3 | 6879  | coding    | PF08718 |
| MSTRG. 5615. 1 | 2636  | noncoding | —       |
| MSTRG. 5618. 3 | 943   | coding    | PF00620 |
| MSTRG. 5612. 1 | 2273  | coding    | PF00450 |
| MSTRG. 5627. 1 | 73520 | noncoding | —       |
| MSTRG. 5628. 1 | 334   | noncoding | —       |
| MSTRG. 5629. 1 | 1526  | noncoding | —       |
| MSTRG. 5629. 2 | 768   | noncoding | —       |

|                 |       |           |         |
|-----------------|-------|-----------|---------|
| MSTRG. 5627. 3  | 3079  | noncoding | -       |
| MSTRG. 5627. 4  | 11190 | noncoding | -       |
| MSTRG. 5627. 5  | 14765 | noncoding | -       |
| MSTRG. 5627. 6  | 14449 | noncoding | -       |
| MSTRG. 5627. 7  | 9507  | noncoding | -       |
| MSTRG. 5627. 8  | 85626 | noncoding | -       |
| MSTRG. 5627. 9  | 75975 | noncoding | -       |
| MSTRG. 5627. 10 | 18506 | noncoding | -       |
| MSTRG. 5627. 11 | 18512 | noncoding | -       |
| MSTRG. 5627. 12 | 18468 | noncoding | -       |
| MSTRG. 5627. 13 | 15972 | noncoding | -       |
| MSTRG. 5627. 14 | 36838 | noncoding | -       |
| MSTRG. 5631. 1  | 6298  | noncoding | -       |
| MSTRG. 5632. 1  | 15990 | noncoding | -       |
| MSTRG. 5633. 1  | 31966 | noncoding | -       |
| MSTRG. 5633. 2  | 7531  | noncoding | -       |
| MSTRG. 5634. 1  | 2177  | noncoding | -       |
| MSTRG. 5632. 2  | 13911 | noncoding | -       |
| MSTRG. 5634. 2  | 5592  | noncoding | -       |
| MSTRG. 5635. 3  | 3862  | coding    | PF07888 |
| MSTRG. 5636. 1  | 6166  | noncoding | -       |
| MSTRG. 5621. 2  | 6459  | coding    | PF03446 |
| MSTRG. 5624. 1  | 50521 | noncoding | -       |
| MSTRG. 5624. 2  | 2221  | noncoding | -       |
| MSTRG. 5638. 1  | 1710  | noncoding | -       |
| MSTRG. 5643. 3  | 1729  | coding    | PF01393 |
| MSTRG. 5642. 4  | 23956 | noncoding | -       |
| MSTRG. 5642. 5  | 10560 | noncoding | -       |
| MSTRG. 5661. 1  | 1077  | noncoding | -       |
| MSTRG. 5668. 3  | 1617  | noncoding | -       |
| MSTRG. 5669. 3  | 4153  | coding    | PF00625 |
| MSTRG. 5669. 4  | 3403  | coding    | PF00625 |
| MSTRG. 5669. 5  | 1956  | coding    | PF00625 |
| MSTRG. 5670. 1  | 1085  | noncoding | -       |
| MSTRG. 5671. 1  | 4447  | noncoding | -       |
| MSTRG. 5672. 1  | 554   | noncoding | -       |
| MSTRG. 5667. 1  | 708   | noncoding | -       |
| MSTRG. 5681. 1  | 14479 | coding    | PF00567 |
| MSTRG. 5681. 5  | 2802  | coding    | PF00567 |
| MSTRG. 5681. 10 | 1236  | coding    | PF14753 |
| MSTRG. 5681. 7  | 2554  | coding    | PF14753 |
| MSTRG. 5681. 11 | 1974  | coding    | PF14753 |
| MSTRG. 5722. 15 | 4345  | noncoding | -       |
| MSTRG. 5726. 1  | 1718  | noncoding | -       |
| MSTRG. 5726. 2  | 5275  | noncoding | -       |
| MSTRG. 5722. 17 | 2459  | noncoding | -       |
| MSTRG. 5722. 18 | 4420  | noncoding | -       |
| MSTRG. 5727. 1  | 4233  | coding    | PF01359 |
| MSTRG. 5728. 1  | 7866  | noncoding | -       |
| MSTRG. 5729. 1  | 1601  | noncoding | -       |
| MSTRG. 5730. 4  | 1044  | noncoding | -       |
| MSTRG. 5722. 19 | 4134  | noncoding | -       |
| MSTRG. 5722. 20 | 17240 | noncoding | -       |
| MSTRG. 5722. 21 | 5335  | noncoding | -       |

|                 |       |           |         |
|-----------------|-------|-----------|---------|
| MSTRG. 5734. 1  | 1851  | noncoding | -       |
| MSTRG. 5722. 22 | 4816  | noncoding | -       |
| MSTRG. 5687. 2  | 2961  | noncoding | -       |
| MSTRG. 5690. 2  | 1083  | coding    | PF04005 |
| MSTRG. 5690. 3  | 1047  | coding    | PF04005 |
| MSTRG. 5695. 3  | 12963 | noncoding | -       |
| MSTRG. 5696. 1  | 6404  | noncoding | -       |
| MSTRG. 5695. 5  | 6752  | coding    | PF08416 |
| MSTRG. 5695. 6  | 7448  | coding    | PF08416 |
| MSTRG. 5693. 1  | 963   | noncoding | -       |
| MSTRG. 5699. 1  | 505   | noncoding | -       |
| MSTRG. 5704. 3  | 2521  | coding    | PF08368 |
| MSTRG. 5707. 14 | 1420  | coding    | PF16545 |
| MSTRG. 5707. 17 | 2950  | coding    | PF16545 |
| MSTRG. 5707. 15 | 2164  | coding    | PF16545 |
| MSTRG. 5707. 11 | 1740  | coding    | PF16545 |
| MSTRG. 5707. 13 | 1590  | coding    | PF16545 |
| MSTRG. 5707. 16 | 1678  | coding    | PF16545 |
| MSTRG. 5707. 6  | 1852  | coding    | PF16545 |
| MSTRG. 5707. 2  | 1929  | coding    | PF16545 |
| MSTRG. 5707. 5  | 1836  | coding    | PF16545 |
| MSTRG. 5707. 9  | 1986  | coding    | PF16545 |
| MSTRG. 5711. 3  | 1124  | noncoding | -       |
| MSTRG. 5713. 3  | 4168  | coding    | PF02891 |
| MSTRG. 5713. 4  | 4722  | coding    | PF02891 |
| MSTRG. 5713. 6  | 9356  | coding    | PF02891 |
| MSTRG. 5713. 5  | 4064  | coding    | PF02891 |
| MSTRG. 5717. 2  | 1563  | noncoding | -       |
| MSTRG. 5717. 1  | 5213  | coding    | PF16870 |
| MSTRG. 5717. 3  | 1061  | noncoding | -       |
| MSTRG. 5717. 4  | 4497  | coding    | PF16870 |
| MSTRG. 5717. 5  | 3255  | coding    | PF16870 |
| MSTRG. 5715. 4  | 3640  | coding    | PF14050 |
| MSTRG. 5715. 3  | 989   | coding    | PF14050 |
| MSTRG. 5716. 1  | 3269  | coding    | PF00957 |
| MSTRG. 5740. 3  | 2266  | coding    | PF10391 |
| MSTRG. 5742. 1  | 469   | noncoding | -       |
| MSTRG. 5745. 3  | 3582  | coding    | PF09166 |
| MSTRG. 5745. 2  | 4354  | coding    | PF09166 |
| MSTRG. 5746. 8  | 798   | noncoding | -       |
| MSTRG. 5746. 9  | 1195  | noncoding | -       |
| MSTRG. 5747. 1  | 5455  | noncoding | -       |
| MSTRG. 5746. 10 | 2650  | noncoding | -       |
| MSTRG. 5782. 1  | 2018  | noncoding | -       |
| MSTRG. 5757. 2  | 771   | noncoding | -       |
| MSTRG. 5757. 1  | 1036  | noncoding | -       |
| MSTRG. 5761. 1  | 8275  | noncoding | -       |
| MSTRG. 5761. 2  | 8710  | noncoding | -       |
| MSTRG. 5763. 2  | 4195  | noncoding | -       |
| MSTRG. 5762. 1  | 416   | noncoding | -       |
| MSTRG. 5835. 1  | 2548  | noncoding | -       |
| MSTRG. 5835. 2  | 9557  | noncoding | -       |
| MSTRG. 5835. 3  | 3582  | noncoding | -       |
| MSTRG. 5835. 4  | 19096 | coding    | PF02515 |

|                 |       |           |         |
|-----------------|-------|-----------|---------|
| MSTRG. 5835. 5  | 15510 | noncoding | -       |
| MSTRG. 5835. 6  | 4542  | coding    | PF02515 |
| MSTRG. 5835. 7  | 34385 | noncoding | -       |
| MSTRG. 5835. 9  | 1857  | coding    | PF02515 |
| MSTRG. 5836. 1  | 3063  | noncoding | -       |
| MSTRG. 5835. 11 | 7172  | coding    | PF02515 |
| MSTRG. 5837. 1  | 14643 | noncoding | -       |
| MSTRG. 5838. 1  | 3189  | noncoding | -       |
| MSTRG. 5835. 13 | 3935  | noncoding | -       |
| MSTRG. 5835. 12 | 7636  | noncoding | -       |
| MSTRG. 5835. 14 | 7511  | noncoding | -       |
| MSTRG. 5835. 15 | 7723  | noncoding | -       |
| MSTRG. 5835. 16 | 3272  | noncoding | -       |
| MSTRG. 5835. 17 | 3450  | coding    | PF02515 |
| MSTRG. 5835. 18 | 3347  | coding    | PF02515 |
| MSTRG. 5835. 20 | 16486 | noncoding | -       |
| MSTRG. 5835. 22 | 7240  | noncoding | -       |
| MSTRG. 5835. 23 | 27623 | noncoding | -       |
| MSTRG. 5835. 25 | 23947 | noncoding | -       |
| MSTRG. 5835. 26 | 6035  | noncoding | -       |
| MSTRG. 5835. 27 | 19207 | noncoding | -       |
| MSTRG. 5835. 28 | 3109  | noncoding | -       |
| MSTRG. 5835. 29 | 9740  | noncoding | -       |
| MSTRG. 5835. 30 | 2359  | noncoding | -       |
| MSTRG. 5840. 1  | 1854  | noncoding | -       |
| MSTRG. 5797. 1  | 8148  | coding    | PF00069 |
| MSTRG. 5797. 6  | 4411  | coding    | PF00069 |
| MSTRG. 5797. 4  | 6168  | coding    | PF00069 |
| MSTRG. 5797. 3  | 4108  | coding    | PF00069 |
| MSTRG. 5797. 5  | 3742  | coding    | PF00069 |
| MSTRG. 5797. 7  | 3428  | coding    | PF00069 |
| MSTRG. 5798. 1  | 8945  | noncoding | -       |
| MSTRG. 5802. 3  | 3805  | noncoding | -       |
| MSTRG. 5803. 1  | 1248  | noncoding | -       |
| MSTRG. 5805. 1  | 7041  | noncoding | -       |
| MSTRG. 5799. 1  | 381   | noncoding | -       |
| MSTRG. 5815. 1  | 362   | noncoding | -       |
| MSTRG. 5832. 1  | 395   | noncoding | -       |
| MSTRG. 5834. 1  | 2113  | coding    | PF12998 |
| MSTRG. 5845. 3  | 3264  | noncoding | -       |
| MSTRG. 5845. 4  | 3108  | noncoding | -       |
| MSTRG. 5856. 2  | 2646  | coding    | PF13639 |
| MSTRG. 5858. 1  | 820   | noncoding | -       |
| MSTRG. 5860. 1  | 1193  | noncoding | -       |
| MSTRG. 5862. 1  | 5740  | noncoding | -       |
| MSTRG. 5864. 1  | 3274  | coding    | PF00568 |
| MSTRG. 5865. 1  | 5128  | noncoding | -       |
| MSTRG. 5866. 1  | 1632  | noncoding | -       |
| MSTRG. 5867. 1  | 947   | noncoding | -       |
| MSTRG. 5872. 5  | 1922  | coding    | PF01630 |
| MSTRG. 5873. 1  | 4213  | noncoding | -       |
| MSTRG. 5874. 2  | 1725  | coding    | PF01630 |
| MSTRG. 5874. 3  | 1054  | coding    | PF01630 |
| MSTRG. 5874. 5  | 1451  | coding    | PF01630 |

|                |       |           |         |
|----------------|-------|-----------|---------|
| MSTRG. 5874. 4 | 1761  | coding    | PF01630 |
| MSTRG. 5877. 1 | 3070  | noncoding | –       |
| MSTRG. 5879. 1 | 2903  | noncoding | –       |
| MSTRG. 5885. 2 | 2345  | coding    | PF00003 |
| MSTRG. 5886. 1 | 389   | noncoding | –       |
| MSTRG. 5890. 2 | 4046  | coding    | PF16624 |
| MSTRG. 5890. 3 | 2755  | coding    | PF16624 |
| MSTRG. 5891. 1 | 3537  | coding    | PF01465 |
| MSTRG. 5891. 2 | 3316  | coding    | PF01465 |
| MSTRG. 5891. 3 | 3273  | coding    | PF01465 |
| MSTRG. 5896. 2 | 12861 | noncoding | –       |
| MSTRG. 5897. 1 | 11595 | noncoding | –       |
| MSTRG. 5901. 1 | 2102  | coding    | PF15220 |
| MSTRG. 5904. 1 | 4055  | coding    | PF12480 |
| MSTRG. 5904. 2 | 2038  | coding    | PF12480 |
| MSTRG. 5904. 4 | 3504  | coding    | PF12480 |
| MSTRG. 5907. 1 | 9154  | coding    | PF00630 |
| MSTRG. 5908. 1 | 1826  | noncoding | –       |
| MSTRG. 5908. 2 | 1027  | noncoding | –       |
| MSTRG. 5907. 3 | 7435  | coding    | PF00630 |
| MSTRG. 5907. 4 | 7489  | coding    | PF00630 |
| MSTRG. 5909. 2 | 3119  | noncoding | –       |
| MSTRG. 5909. 3 | 3395  | noncoding | –       |
| MSTRG. 5909. 4 | 2392  | noncoding | –       |
| MSTRG. 5910. 1 | 2320  | coding    | PF00335 |
| MSTRG. 5915. 1 | 5362  | coding    | PF05221 |
| MSTRG. 5915. 4 | 1214  | noncoding | –       |
| MSTRG. 5915. 3 | 5067  | coding    | PF05221 |
| MSTRG. 5916. 1 | 5224  | noncoding | –       |
| MSTRG. 5917. 2 | 1127  | noncoding | –       |
| MSTRG. 5918. 1 | 280   | noncoding | –       |
| MSTRG. 5919. 1 | 7350  | noncoding | –       |
| MSTRG. 5920. 1 | 11623 | noncoding | –       |
| MSTRG. 5924. 1 | 2104  | noncoding | –       |
| MSTRG. 5924. 6 | 6413  | coding    | PF10491 |
| MSTRG. 5924. 7 | 1731  | coding    | PF10491 |
| MSTRG. 5924. 8 | 2447  | coding    | PF10491 |
| MSTRG. 5921. 1 | 1084  | noncoding | –       |
| MSTRG. 5922. 3 | 2427  | coding    | PF00179 |
| MSTRG. 5922. 4 | 6628  | noncoding | –       |
| MSTRG. 5923. 1 | 9673  | noncoding | –       |
| MSTRG. 5925. 1 | 2215  | coding    | PF07967 |
| MSTRG. 5925. 2 | 2393  | coding    | PF07967 |
| MSTRG. 5925. 4 | 3197  | coding    | PF07967 |
| MSTRG. 5925. 3 | 3067  | coding    | PF07967 |
| MSTRG. 5925. 5 | 3183  | coding    | PF07967 |
| MSTRG. 5927. 1 | 6777  | coding    | PF00078 |
| MSTRG. 5927. 2 | 7821  | noncoding | –       |
| MSTRG. 5932. 1 | 998   | coding    | PF15468 |
| MSTRG. 5934. 1 | 2419  | coding    | PF00246 |
| MSTRG. 5934. 3 | 2157  | coding    | PF00246 |
| MSTRG. 5934. 4 | 2205  | coding    | PF00246 |
| MSTRG. 5935. 2 | 2342  | coding    | PF00561 |
| MSTRG. 5936. 1 | 2978  | coding    | PF01602 |

|                |      |           |         |
|----------------|------|-----------|---------|
| MSTRG. 5939. 1 | 406  | noncoding | -       |
| MSTRG. 5940. 1 | 326  | noncoding | -       |
| MSTRG. 5940. 2 | 935  | noncoding | -       |
| MSTRG. 5939. 2 | 296  | noncoding | -       |
| MSTRG. 5940. 4 | 338  | noncoding | -       |
| MSTRG. 5939. 3 | 709  | noncoding | -       |
| MSTRG. 5939. 4 | 461  | noncoding | -       |
| MSTRG. 5940. 5 | 311  | noncoding | -       |
| MSTRG. 5942. 1 | 223  | noncoding | -       |
| MSTRG. 5944. 1 | 1044 | noncoding | -       |
| MSTRG. 5945. 1 | 263  | noncoding | -       |
| MSTRG. 5946. 1 | 844  | noncoding | -       |
| MSTRG. 5945. 2 | 247  | noncoding | -       |
| MSTRG. 5949. 2 | 733  | coding    | PF14994 |
| MSTRG. 5966. 1 | 1444 | noncoding | -       |
| MSTRG. 5965. 5 | 8375 | coding    | PF06588 |
| MSTRG. 5969. 1 | 1458 | noncoding | -       |
| MSTRG. 5965. 6 | 1433 | coding    | PF06588 |
| MSTRG. 5965. 7 | 1645 | noncoding | -       |
| MSTRG. 5965. 8 | 6508 | coding    | PF06588 |
| MSTRG. 5970. 1 | 741  | noncoding | -       |
| MSTRG. 5972. 1 | 3267 | noncoding | -       |
| MSTRG. 5951. 1 | 1613 | noncoding | -       |
| MSTRG. 5953. 1 | 1234 | coding    | PF08337 |
| MSTRG. 5955. 2 | 1200 | coding    | PF05300 |
| MSTRG. 5956. 3 | 2600 | coding    | PF04048 |
| MSTRG. 5956. 2 | 6812 | coding    | PF04048 |
| MSTRG. 5956. 4 | 2677 | noncoding | -       |
| MSTRG. 5958. 1 | 5275 | noncoding | -       |
| MSTRG. 5956. 6 | 2587 | noncoding | -       |
| MSTRG. 5956. 7 | 2984 | noncoding | -       |
| MSTRG. 5959. 1 | 6012 | noncoding | -       |
| MSTRG. 5960. 1 | 3483 | noncoding | -       |
| MSTRG. 5961. 1 | 4294 | noncoding | -       |
| MSTRG. 5962. 1 | 2202 | noncoding | -       |
| MSTRG. 5956. 8 | 1813 | noncoding | -       |
| MSTRG. 5985. 4 | 2562 | noncoding | -       |
| MSTRG. 5985. 7 | 2673 | noncoding | -       |
| MSTRG. 5985. 5 | 3406 | noncoding | -       |
| MSTRG. 5985. 8 | 3748 | noncoding | -       |
| MSTRG. 5986. 1 | 5464 | coding    | PF00078 |
| MSTRG. 5989. 1 | 1382 | noncoding | -       |
| MSTRG. 5990. 2 | 1833 | coding    | PF14985 |
| MSTRG. 5989. 4 | 1496 | coding    | PF15325 |
| MSTRG. 5984. 1 | 2710 | noncoding | -       |
| MSTRG. 5991. 1 | 1480 | noncoding | -       |
| MSTRG. 5991. 3 | 522  | noncoding | -       |
| MSTRG. 5992. 1 | 6469 | coding    | PF00860 |
| MSTRG. 5994. 1 | 1203 | noncoding | -       |
| MSTRG. 5995. 1 | 1073 | noncoding | -       |
| MSTRG. 5997. 1 | 287  | noncoding | -       |
| MSTRG. 5999. 1 | 503  | noncoding | -       |
| MSTRG. 6004. 5 | 2489 | coding    | PF14570 |
| MSTRG. 6004. 4 | 2725 | coding    | PF14570 |

|                 |       |           |         |
|-----------------|-------|-----------|---------|
| MSTRG. 6005. 1  | 5677  | noncoding | -       |
| MSTRG. 6006. 1  | 4577  | noncoding | -       |
| MSTRG. 6004. 7  | 2947  | coding    | PF14570 |
| MSTRG. 6007. 1  | 1634  | noncoding | -       |
| MSTRG. 6008. 1  | 6249  | noncoding | -       |
| MSTRG. 6008. 2  | 639   | noncoding | -       |
| MSTRG. 6009. 3  | 6538  | coding    | PF11894 |
| MSTRG. 6001. 2  | 413   | coding    | PF00827 |
| MSTRG. 6010. 2  | 4061  | coding    | PF12796 |
| MSTRG. 6020. 4  | 3737  | coding    | PF00439 |
| MSTRG. 6029. 2  | 1093  | noncoding | -       |
| MSTRG. 6029. 3  | 1052  | noncoding | -       |
| MSTRG. 6029. 4  | 5935  | coding    | PF14075 |
| MSTRG. 6030. 1  | 594   | noncoding | -       |
| MSTRG. 6033. 2  | 1130  | noncoding | -       |
| MSTRG. 6035. 1  | 4197  | coding    | PF01359 |
| MSTRG. 6036. 2  | 2796  | coding    | PF03194 |
| MSTRG. 6036. 3  | 2536  | coding    | PF03194 |
| MSTRG. 6037. 1  | 5866  | noncoding | -       |
| MSTRG. 6040. 1  | 15070 | coding    | PF00069 |
| MSTRG. 6040. 2  | 15005 | coding    | PF00069 |
| MSTRG. 6040. 3  | 14792 | coding    | PF00069 |
| MSTRG. 6040. 5  | 3077  | noncoding | -       |
| MSTRG. 6040. 4  | 3980  | coding    | PF00069 |
| MSTRG. 6040. 6  | 2325  | noncoding | -       |
| MSTRG. 6040. 7  | 2343  | noncoding | -       |
| MSTRG. 6040. 8  | 2102  | noncoding | -       |
| MSTRG. 6040. 9  | 1921  | coding    | PF00069 |
| MSTRG. 6040. 10 | 1536  | coding    | PF00069 |
| MSTRG. 6040. 11 | 1614  | coding    | PF00069 |
| MSTRG. 6042. 1  | 1899  | coding    | PF00067 |
| MSTRG. 6043. 3  | 2827  | noncoding | -       |
| MSTRG. 6045. 2  | 4417  | noncoding | -       |
| MSTRG. 6050. 1  | 4752  | coding    | PF15815 |
| MSTRG. 6050. 3  | 3263  | coding    | PF15815 |
| MSTRG. 6050. 4  | 3533  | coding    | PF15815 |
| MSTRG. 6050. 7  | 1320  | noncoding | -       |
| MSTRG. 6056. 1  | 4443  | coding    | PF02141 |
| MSTRG. 6058. 1  | 3910  | noncoding | -       |
| MSTRG. 6058. 2  | 4101  | noncoding | -       |
| MSTRG. 6060. 3  | 4233  | coding    | PF14813 |
| MSTRG. 6060. 2  | 4638  | coding    | PF14813 |
| MSTRG. 6061. 2  | 9546  | coding    | PF07714 |
| MSTRG. 6061. 4  | 7844  | coding    | PF07714 |
| MSTRG. 6061. 5  | 4541  | noncoding | -       |
| MSTRG. 6061. 6  | 10573 | coding    | PF07714 |
| MSTRG. 6061. 7  | 5589  | coding    | PF07714 |
| MSTRG. 6061. 10 | 2109  | coding    | PF07714 |
| MSTRG. 6061. 11 | 2051  | coding    | PF07714 |
| MSTRG. 6061. 12 | 2490  | coding    | PF07714 |
| MSTRG. 6061. 9  | 2476  | coding    | PF07714 |
| MSTRG. 6062. 1  | 2702  | noncoding | -       |
| MSTRG. 6063. 1  | 1855  | noncoding | -       |
| MSTRG. 6055. 2  | 889   | coding    | PF00436 |



|                 |       |           |         |
|-----------------|-------|-----------|---------|
| MSTRG. 6055. 3  | 714   | coding    | PF00436 |
| MSTRG. 6065. 2  | 1249  | noncoding | –       |
| MSTRG. 6066. 1  | 6257  | coding    | PF01055 |
| MSTRG. 6067. 2  | 1119  | coding    | PF00089 |
| MSTRG. 6068. 2  | 1045  | noncoding | –       |
| MSTRG. 6073. 1  | 673   | coding    | PF07686 |
| MSTRG. 6074. 1  | 500   | noncoding | –       |
| MSTRG. 6075. 1  | 1004  | coding    | PF00089 |
| MSTRG. 6076. 1  | 797   | coding    | PF07654 |
| MSTRG. 6077. 1  | 446   | coding    | PF07654 |
| MSTRG. 6077. 2  | 746   | coding    | PF07654 |
| MSTRG. 6088. 1  | 3446  | coding    | PF01323 |
| MSTRG. 6088. 5  | 728   | coding    | PF01323 |
| MSTRG. 6089. 2  | 3653  | coding    | PF00656 |
| MSTRG. 6089. 3  | 4034  | coding    | PF00656 |
| MSTRG. 6096. 1  | 268   | noncoding | –       |
| MSTRG. 6100. 1  | 7369  | noncoding | –       |
| MSTRG. 6104. 1  | 1311  | noncoding | –       |
| MSTRG. 6105. 1  | 818   | noncoding | –       |
| MSTRG. 6112. 1  | 4678  | noncoding | –       |
| MSTRG. 6113. 1  | 852   | noncoding | –       |
| MSTRG. 6121. 3  | 13239 | coding    | PF00856 |
| MSTRG. 6121. 5  | 2559  | coding    | PF00856 |
| MSTRG. 6121. 7  | 12292 | coding    | PF00856 |
| MSTRG. 6121. 9  | 5283  | coding    | PF00856 |
| MSTRG. 6121. 10 | 5436  | coding    | PF00856 |
| MSTRG. 6119. 1  | 3877  | noncoding | –       |
| MSTRG. 6119. 3  | 3594  | coding    | PF01352 |
| MSTRG. 6124. 3  | 2815  | coding    | PF01352 |
| MSTRG. 6125. 2  | 4326  | coding    | PF01352 |
| MSTRG. 6125. 3  | 4227  | coding    | PF01352 |
| MSTRG. 6125. 4  | 4203  | coding    | PF01352 |
| MSTRG. 6130. 4  | 3713  | coding    | PF01352 |
| MSTRG. 6127. 1  | 378   | noncoding | –       |
| MSTRG. 6133. 1  | 373   | noncoding | –       |
| MSTRG. 6133. 2  | 311   | noncoding | –       |
| MSTRG. 6134. 1  | 479   | noncoding | –       |
| MSTRG. 6136. 1  | 663   | noncoding | –       |
| MSTRG. 6136. 2  | 1734  | noncoding | –       |
| MSTRG. 6139. 6  | 3237  | noncoding | –       |
| MSTRG. 6140. 2  | 661   | noncoding | –       |
| MSTRG. 6141. 2  | 2646  | noncoding | –       |
| MSTRG. 6143. 1  | 2011  | coding    | PF04548 |
| MSTRG. 6145. 3  | 1752  | coding    | PF04548 |
| MSTRG. 6149. 1  | 1921  | coding    | PF04548 |
| MSTRG. 6154. 3  | 1028  | noncoding | –       |
| MSTRG. 6163. 1  | 1491  | noncoding | –       |
| MSTRG. 6163. 2  | 1545  | noncoding | –       |
| MSTRG. 6163. 4  | 2217  | noncoding | –       |
| MSTRG. 6163. 5  | 1856  | noncoding | –       |
| MSTRG. 6161. 2  | 2386  | noncoding | –       |
| MSTRG. 6161. 3  | 3165  | coding    | PF01412 |
| MSTRG. 6167. 1  | 3616  | coding    | PF12848 |
| MSTRG. 6167. 3  | 3328  | coding    | PF12848 |

|                 |       |           |         |
|-----------------|-------|-----------|---------|
| MSTRG. 6169. 2  | 1712  | coding    | PF02201 |
| MSTRG. 6170. 1  | 2052  | noncoding | –       |
| MSTRG. 6171. 1  | 981   | noncoding | –       |
| MSTRG. 6171. 2  | 879   | noncoding | –       |
| MSTRG. 6173. 2  | 6809  | coding    | PF00071 |
| MSTRG. 6173. 3  | 2960  | noncoding | –       |
| MSTRG. 6174. 7  | 1912  | noncoding | –       |
| MSTRG. 6174. 1  | 1824  | noncoding | –       |
| MSTRG. 6174. 6  | 1819  | noncoding | –       |
| MSTRG. 6174. 9  | 316   | noncoding | –       |
| MSTRG. 6174. 10 | 325   | noncoding | –       |
| MSTRG. 6186. 2  | 1649  | noncoding | –       |
| MSTRG. 6190. 2  | 16909 | coding    | PF05965 |
| MSTRG. 6190. 1  | 16949 | coding    | PF05965 |
| MSTRG. 6190. 10 | 15065 | coding    | PF05965 |
| MSTRG. 6190. 11 | 15388 | coding    | PF05965 |
| MSTRG. 6190. 15 | 14784 | coding    | PF05965 |
| MSTRG. 6190. 12 | 15047 | coding    | PF05965 |
| MSTRG. 6190. 5  | 15034 | coding    | PF05965 |
| MSTRG. 6190. 14 | 15452 | coding    | PF05965 |
| MSTRG. 6190. 9  | 16113 | coding    | PF05965 |
| MSTRG. 6190. 6  | 16370 | coding    | PF05965 |
| MSTRG. 6190. 4  | 16371 | coding    | PF05965 |
| MSTRG. 6190. 8  | 16365 | coding    | PF05965 |
| MSTRG. 6190. 17 | 3994  | coding    | PF00628 |
| MSTRG. 6192. 1  | 2744  | noncoding | –       |
| MSTRG. 6193. 1  | 3128  | noncoding | –       |
| MSTRG. 6179. 1  | 3253  | noncoding | –       |
| MSTRG. 6179. 2  | 738   | noncoding | –       |
| MSTRG. 6180. 6  | 4482  | coding    | PF00022 |
| MSTRG. 6180. 7  | 6111  | coding    | PF00022 |
| MSTRG. 6180. 5  | 4354  | coding    | PF00022 |
| MSTRG. 6180. 2  | 2715  | coding    | PF00022 |
| MSTRG. 6180. 4  | 2705  | coding    | PF00022 |
| MSTRG. 6180. 8  | 5823  | noncoding | –       |
| MSTRG. 6181. 1  | 2674  | noncoding | –       |
| MSTRG. 6181. 2  | 3632  | noncoding | –       |
| MSTRG. 6180. 10 | 976   | coding    | PF00022 |
| MSTRG. 6180. 11 | 1024  | coding    | PF00022 |
| MSTRG. 6180. 9  | 1081  | coding    | PF00022 |
| MSTRG. 6182. 1  | 1174  | noncoding | –       |
| MSTRG. 6184. 1  | 2402  | noncoding | –       |
| MSTRG. 6196. 1  | 246   | noncoding | –       |
| MSTRG. 6201. 1  | 2924  | noncoding | –       |
| MSTRG. 6204. 2  | 3491  | coding    | PF12738 |
| MSTRG. 6204. 3  | 4807  | coding    | PF12738 |
| MSTRG. 6206. 1  | 598   | noncoding | –       |
| MSTRG. 6212. 1  | 10373 | noncoding | –       |
| MSTRG. 6212. 2  | 9838  | noncoding | –       |
| MSTRG. 6212. 3  | 1080  | noncoding | –       |
| MSTRG. 6212. 8  | 4920  | noncoding | –       |
| MSTRG. 6220. 1  | 450   | noncoding | –       |
| MSTRG. 6222. 3  | 1349  | noncoding | –       |
| MSTRG. 6222. 4  | 1194  | noncoding | –       |

|                |       |           |         |
|----------------|-------|-----------|---------|
| MSTRG. 6223. 1 | 5618  | noncoding | -       |
| MSTRG. 6231. 1 | 2583  | coding    | PF02847 |
| MSTRG. 6232. 2 | 4675  | coding    | PF00632 |
| MSTRG. 6232. 4 | 4763  | coding    | PF00632 |
| MSTRG. 6233. 1 | 1972  | noncoding | -       |
| MSTRG. 6233. 2 | 2418  | noncoding | -       |
| MSTRG. 6235. 5 | 1088  | coding    | PF00226 |
| MSTRG. 6235. 4 | 1876  | coding    | PF00226 |
| MSTRG. 6235. 6 | 8169  | coding    | PF00226 |
| MSTRG. 6235. 7 | 7907  | noncoding | -       |
| MSTRG. 6235. 8 | 6304  | coding    | PF00226 |
| MSTRG. 6235. 9 | 7384  | coding    | PF00226 |
| MSTRG. 6238. 2 | 4774  | coding    | PF00102 |
| MSTRG. 6240. 1 | 3461  | noncoding | -       |
| MSTRG. 6238. 3 | 834   | coding    | PF14948 |
| MSTRG. 6242. 1 | 1273  | noncoding | -       |
| MSTRG. 6237. 2 | 3586  | noncoding | -       |
| MSTRG. 6237. 3 | 3004  | noncoding | -       |
| MSTRG. 6237. 4 | 3280  | noncoding | -       |
| MSTRG. 6237. 5 | 4800  | coding    | PF12422 |
| MSTRG. 6251. 1 | 5923  | coding    | PF17047 |
| MSTRG. 6251. 2 | 9067  | coding    | PF17047 |
| MSTRG. 6251. 3 | 7187  | coding    | PF17047 |
| MSTRG. 6251. 4 | 18747 | coding    | PF17047 |
| MSTRG. 6251. 5 | 8424  | coding    | PF17047 |
| MSTRG. 6251. 7 | 3287  | coding    | PF17047 |
| MSTRG. 6251. 8 | 5815  | coding    | PF17047 |
| MSTRG. 6252. 1 | 3487  | noncoding | -       |
| MSTRG. 6253. 1 | 5208  | noncoding | -       |
| MSTRG. 6253. 2 | 4854  | noncoding | -       |
| MSTRG. 6253. 3 | 5354  | noncoding | -       |
| MSTRG. 6253. 5 | 4087  | noncoding | -       |
| MSTRG. 6248. 1 | 773   | noncoding | -       |
| MSTRG. 6267. 3 | 1254  | noncoding | -       |
| MSTRG. 6271. 1 | 7105  | noncoding | -       |
| MSTRG. 6271. 3 | 6848  | noncoding | -       |
| MSTRG. 6272. 1 | 3658  | coding    | PF05485 |
| MSTRG. 6273. 2 | 5670  | noncoding | -       |
| MSTRG. 6273. 3 | 6257  | noncoding | -       |
| MSTRG. 6274. 2 | 744   | coding    | PF12068 |
| MSTRG. 6285. 1 | 1856  | noncoding | -       |
| MSTRG. 6288. 1 | 403   | noncoding | -       |
| MSTRG. 6312. 1 | 10245 | coding    | PF02214 |
| MSTRG. 6312. 2 | 3656  | coding    | PF02214 |
| MSTRG. 6314. 1 | 2004  | noncoding | -       |
| MSTRG. 6312. 8 | 6546  | coding    | PF02214 |
| MSTRG. 6315. 1 | 11184 | noncoding | -       |
| MSTRG. 6316. 1 | 6954  | noncoding | -       |
| MSTRG. 6314. 2 | 11130 | noncoding | -       |
| MSTRG. 6314. 3 | 6799  | noncoding | -       |
| MSTRG. 6314. 4 | 6131  | noncoding | -       |
| MSTRG. 6317. 1 | 4392  | noncoding | -       |
| MSTRG. 6316. 2 | 15599 | noncoding | -       |
| MSTRG. 6318. 1 | 3067  | noncoding | -       |

|                |       |           |         |
|----------------|-------|-----------|---------|
| MSTRG. 6316. 3 | 2505  | noncoding | -       |
| MSTRG. 6316. 4 | 1528  | noncoding | -       |
| MSTRG. 6316. 5 | 20842 | coding    | PF00078 |
| MSTRG. 6316. 6 | 8309  | noncoding | -       |
| MSTRG. 6319. 1 | 467   | noncoding | -       |
| MSTRG. 6319. 2 | 330   | noncoding | -       |
| MSTRG. 6319. 3 | 484   | noncoding | -       |
| MSTRG. 6320. 1 | 1277  | noncoding | -       |
| MSTRG. 6323. 2 | 13730 | noncoding | -       |
| MSTRG. 6308. 4 | 6026  | noncoding | -       |
| MSTRG. 6327. 1 | 3707  | coding    | PF01237 |
| MSTRG. 6328. 1 | 945   | noncoding | -       |
| MSTRG. 6332. 2 | 1230  | coding    | PF12796 |
| MSTRG. 6332. 3 | 4765  | coding    | PF12796 |
| MSTRG. 6333. 1 | 566   | noncoding | -       |
| MSTRG. 6334. 2 | 1188  | coding    | PF00412 |
| MSTRG. 6348. 1 | 1033  | noncoding | -       |
| MSTRG. 6348. 2 | 6248  | noncoding | -       |
| MSTRG. 6349. 2 | 6205  | noncoding | -       |
| MSTRG. 6349. 1 | 7983  | noncoding | -       |
| MSTRG. 6349. 3 | 8029  | noncoding | -       |
| MSTRG. 6349. 4 | 7935  | noncoding | -       |
| MSTRG. 6349. 5 | 6119  | noncoding | -       |
| MSTRG. 6349. 6 | 6282  | noncoding | -       |
| MSTRG. 6349. 7 | 6109  | noncoding | -       |
| MSTRG. 6349. 8 | 8513  | noncoding | -       |
| MSTRG. 6350. 1 | 689   | noncoding | -       |
| MSTRG. 6351. 1 | 7826  | noncoding | -       |
| MSTRG. 6351. 3 | 6332  | noncoding | -       |
| MSTRG. 6355. 5 | 2498  | coding    | PF15898 |
| MSTRG. 6355. 4 | 9869  | coding    | PF15898 |
| MSTRG. 6356. 1 | 1294  | noncoding | -       |
| MSTRG. 6357. 1 | 953   | noncoding | -       |
| MSTRG. 6355. 6 | 1396  | noncoding | -       |
| MSTRG. 6358. 1 | 3894  | noncoding | -       |
| MSTRG. 6359. 1 | 3620  | noncoding | -       |
| MSTRG. 6359. 2 | 5656  | noncoding | -       |
| MSTRG. 6355. 7 | 1799  | noncoding | -       |
| MSTRG. 6360. 1 | 1990  | noncoding | -       |
| MSTRG. 6363. 1 | 3563  | noncoding | -       |
| MSTRG. 6364. 1 | 1978  | noncoding | -       |
| MSTRG. 6384. 1 | 3449  | noncoding | -       |
| MSTRG. 6385. 1 | 2381  | noncoding | -       |
| MSTRG. 6386. 1 | 4194  | noncoding | -       |
| MSTRG. 6387. 1 | 4306  | noncoding | -       |
| MSTRG. 6388. 1 | 5356  | noncoding | -       |
| MSTRG. 6389. 1 | 9231  | noncoding | -       |
| MSTRG. 6389. 2 | 3648  | noncoding | -       |
| MSTRG. 6389. 3 | 1769  | noncoding | -       |
| MSTRG. 6383. 2 | 6647  | coding    | PF08409 |
| MSTRG. 6383. 3 | 3488  | coding    | PF08409 |
| MSTRG. 6383. 4 | 3037  | noncoding | -       |
| MSTRG. 6379. 1 | 548   | noncoding | -       |
| MSTRG. 6391. 1 | 5116  | noncoding | -       |

|                 |       |           |         |
|-----------------|-------|-----------|---------|
| MSTRG. 6404. 2  | 5754  | noncoding | -       |
| MSTRG. 6404. 3  | 6302  | noncoding | -       |
| MSTRG. 6433. 11 | 1954  | coding    | PF15663 |
| MSTRG. 6433. 12 | 1937  | coding    | PF15663 |
| MSTRG. 6433. 15 | 1820  | coding    | PF15663 |
| MSTRG. 6433. 3  | 1695  | coding    | PF15663 |
| MSTRG. 6433. 4  | 1872  | coding    | PF15663 |
| MSTRG. 6433. 5  | 1989  | coding    | PF15663 |
| MSTRG. 6433. 6  | 2006  | coding    | PF15663 |
| MSTRG. 6433. 8  | 1920  | coding    | PF15663 |
| MSTRG. 6433. 13 | 2245  | coding    | PF15663 |
| MSTRG. 6433. 10 | 2246  | coding    | PF15663 |
| MSTRG. 6433. 14 | 2277  | coding    | PF15663 |
| MSTRG. 6433. 16 | 2993  | coding    | PF15663 |
| MSTRG. 6433. 7  | 2331  | coding    | PF15663 |
| MSTRG. 6433. 9  | 2112  | coding    | PF15663 |
| MSTRG. 6435. 2  | 8595  | coding    | PF16574 |
| MSTRG. 6436. 2  | 3048  | coding    | PF08409 |
| MSTRG. 6430. 2  | 4769  | coding    | PF02404 |
| MSTRG. 6442. 1  | 3290  | noncoding | -       |
| MSTRG. 6454. 2  | 1536  | coding    | PF07742 |
| MSTRG. 6456. 1  | 606   | noncoding | -       |
| MSTRG. 6456. 2  | 593   | noncoding | -       |
| MSTRG. 6457. 4  | 2765  | noncoding | -       |
| MSTRG. 6457. 2  | 2873  | noncoding | -       |
| MSTRG. 6457. 3  | 3366  | noncoding | -       |
| MSTRG. 6457. 5  | 2866  | noncoding | -       |
| MSTRG. 6464. 3  | 1591  | noncoding | -       |
| MSTRG. 6478. 1  | 4657  | noncoding | -       |
| MSTRG. 6497. 2  | 2846  | coding    | PF00104 |
| MSTRG. 6497. 3  | 2263  | coding    | PF00105 |
| MSTRG. 6497. 4  | 5380  | coding    | PF00105 |
| MSTRG. 6497. 5  | 5704  | coding    | PF00621 |
| MSTRG. 6497. 6  | 5602  | coding    | PF00621 |
| MSTRG. 6497. 7  | 11885 | coding    | PF00621 |
| MSTRG. 6497. 9  | 2207  | noncoding | -       |
| MSTRG. 6497. 10 | 8200  | noncoding | -       |
| MSTRG. 6497. 11 | 6114  | noncoding | -       |
| MSTRG. 6501. 1  | 4041  | coding    | PF12632 |
| MSTRG. 6501. 2  | 4126  | coding    | PF12632 |
| MSTRG. 6501. 3  | 3130  | coding    | PF12632 |
| MSTRG. 6501. 4  | 3711  | coding    | PF12632 |
| MSTRG. 6501. 5  | 3913  | coding    | PF12632 |
| MSTRG. 6501. 6  | 3167  | noncoding | -       |
| MSTRG. 6501. 7  | 1988  | noncoding | -       |
| MSTRG. 6501. 8  | 2637  | noncoding | -       |
| MSTRG. 6502. 4  | 3323  | noncoding | -       |
| MSTRG. 6503. 1  | 2171  | noncoding | -       |
| MSTRG. 6487. 2  | 4074  | coding    | PF00443 |
| MSTRG. 6487. 1  | 3693  | coding    | PF00443 |
| MSTRG. 6487. 3  | 3734  | coding    | PF00443 |
| MSTRG. 6489. 1  | 1688  | noncoding | -       |
| MSTRG. 6494. 1  | 1562  | coding    | PF09735 |
| MSTRG. 6496. 2  | 895   | noncoding | -       |

|                 |       |           |         |
|-----------------|-------|-----------|---------|
| MSTRG. 6505. 2  | 2484  | coding    | PF08441 |
| MSTRG. 6507. 1  | 2289  | noncoding | –       |
| MSTRG. 6507. 2  | 2204  | noncoding | –       |
| MSTRG. 6508. 2  | 3635  | noncoding | –       |
| MSTRG. 6513. 1  | 1720  | coding    | PF00046 |
| MSTRG. 6513. 2  | 1602  | coding    | PF00046 |
| MSTRG. 6515. 1  | 423   | noncoding | –       |
| MSTRG. 6520. 1  | 1054  | noncoding | –       |
| MSTRG. 6522. 3  | 1994  | noncoding | –       |
| MSTRG. 6522. 4  | 1662  | noncoding | –       |
| MSTRG. 6530. 1  | 3211  | coding    | PF00069 |
| MSTRG. 6530. 2  | 2704  | coding    | PF00013 |
| MSTRG. 6530. 7  | 1857  | coding    | PF00013 |
| MSTRG. 6530. 11 | 1273  | coding    | PF00013 |
| MSTRG. 6530. 13 | 2025  | coding    | PF00013 |
| MSTRG. 6530. 12 | 2160  | coding    | PF00013 |
| MSTRG. 6530. 14 | 1683  | coding    | PF00013 |
| MSTRG. 6530. 15 | 1019  | noncoding | –       |
| MSTRG. 6524. 1  | 4706  | noncoding | –       |
| MSTRG. 6524. 2  | 18420 | noncoding | –       |
| MSTRG. 6524. 3  | 17780 | noncoding | –       |
| MSTRG. 6524. 6  | 2893  | noncoding | –       |
| MSTRG. 6524. 7  | 3055  | noncoding | –       |
| MSTRG. 6524. 8  | 2897  | noncoding | –       |
| MSTRG. 6526. 1  | 2200  | noncoding | –       |
| MSTRG. 6527. 2  | 1184  | coding    | PF03690 |
| MSTRG. 6527. 3  | 1004  | coding    | PF03690 |
| MSTRG. 6538. 3  | 1867  | coding    | PF00282 |
| MSTRG. 6544. 1  | 4951  | coding    | PF08416 |
| MSTRG. 6544. 3  | 4992  | coding    | PF08416 |
| MSTRG. 6540. 2  | 2129  | noncoding | –       |
| MSTRG. 6546. 1  | 1802  | coding    | PF00038 |
| MSTRG. 6550. 2  | 1771  | coding    | PF00038 |
| MSTRG. 6550. 3  | 1793  | coding    | PF00038 |
| MSTRG. 6550. 5  | 1707  | coding    | PF00038 |
| MSTRG. 6550. 6  | 1729  | coding    | PF00038 |
| MSTRG. 6551. 1  | 3271  | noncoding | –       |
| MSTRG. 6551. 2  | 2445  | noncoding | –       |
| MSTRG. 6551. 3  | 2994  | noncoding | –       |
| MSTRG. 6554. 1  | 2557  | coding    | PF00105 |
| MSTRG. 6555. 1  | 772   | noncoding | –       |
| MSTRG. 6562. 1  | 11808 | coding    | PF06512 |
| MSTRG. 6562. 3  | 7926  | noncoding | –       |
| MSTRG. 6568. 1  | 1989  | noncoding | –       |
| MSTRG. 6567. 6  | 955   | noncoding | –       |
| MSTRG. 6564. 2  | 728   | noncoding | –       |
| MSTRG. 6564. 3  | 2083  | noncoding | –       |
| MSTRG. 6577. 3  | 3077  | coding    | PF16019 |
| MSTRG. 6577. 2  | 4618  | coding    | PF16019 |
| MSTRG. 6582. 3  | 3012  | coding    | PF01566 |
| MSTRG. 6582. 2  | 3448  | coding    | PF01566 |
| MSTRG. 6582. 1  | 2136  | coding    | PF01566 |
| MSTRG. 6582. 4  | 3140  | coding    | PF01566 |
| MSTRG. 6585. 1  | 1570  | coding    | PF00089 |

|                 |       |           |         |
|-----------------|-------|-----------|---------|
| MSTRG. 6587. 1  | 2663  | noncoding | –       |
| MSTRG. 6589. 2  | 2073  | noncoding | –       |
| MSTRG. 6591. 2  | 2889  | coding    | PF05383 |
| MSTRG. 6591. 3  | 2321  | coding    | PF05383 |
| MSTRG. 6592. 1  | 8172  | noncoding | –       |
| MSTRG. 6592. 2  | 11450 | noncoding | –       |
| MSTRG. 6594. 2  | 3313  | coding    | PF00412 |
| MSTRG. 6594. 3  | 3931  | coding    | PF00412 |
| MSTRG. 6598. 1  | 2967  | noncoding | –       |
| MSTRG. 6601. 4  | 498   | noncoding | –       |
| MSTRG. 6605. 1  | 3084  | coding    | PF00858 |
| MSTRG. 6606. 2  | 3036  | coding    | PF01359 |
| MSTRG. 6614. 1  | 2293  | noncoding | –       |
| MSTRG. 6614. 2  | 5597  | coding    | PF06367 |
| MSTRG. 6612. 3  | 2745  | noncoding | –       |
| MSTRG. 6624. 2  | 1566  | coding    | PF03953 |
| MSTRG. 6624. 3  | 1853  | coding    | PF03953 |
| MSTRG. 6624. 4  | 2003  | coding    | PF03953 |
| MSTRG. 6624. 5  | 1440  | coding    | PF03953 |
| MSTRG. 6624. 7  | 2064  | coding    | PF03953 |
| MSTRG. 6624. 6  | 2084  | coding    | PF03953 |
| MSTRG. 6624. 8  | 1398  | coding    | PF03953 |
| MSTRG. 6624. 9  | 1256  | coding    | PF00091 |
| MSTRG. 6624. 10 | 1800  | coding    | PF03953 |
| MSTRG. 6624. 11 | 1894  | coding    | PF03953 |
| MSTRG. 6626. 1  | 301   | noncoding | –       |
| MSTRG. 6627. 1  | 3234  | coding    | PF03953 |
| MSTRG. 6627. 2  | 1714  | coding    | PF03953 |
| MSTRG. 6627. 3  | 1792  | coding    | PF03953 |
| MSTRG. 6627. 4  | 1633  | coding    | PF03953 |
| MSTRG. 6627. 5  | 1722  | coding    | PF03953 |
| MSTRG. 6627. 6  | 1710  | coding    | PF03953 |
| MSTRG. 6627. 7  | 1626  | coding    | PF03953 |
| MSTRG. 6622. 2  | 2011  | noncoding | –       |
| MSTRG. 6622. 3  | 408   | noncoding | –       |
| MSTRG. 6622. 4  | 1823  | noncoding | –       |
| MSTRG. 6633. 1  | 20646 | coding    | PF05965 |
| MSTRG. 6633. 2  | 20610 | coding    | PF05965 |
| MSTRG. 6633. 7  | 12236 | coding    | PF00628 |
| MSTRG. 6633. 5  | 20093 | coding    | PF05965 |
| MSTRG. 6634. 2  | 2538  | noncoding | –       |
| MSTRG. 6629. 2  | 888   | coding    | PF00025 |
| MSTRG. 6636. 3  | 2680  | coding    | PF00625 |
| MSTRG. 6636. 4  | 2784  | coding    | PF00625 |
| MSTRG. 6636. 5  | 2764  | coding    | PF00625 |
| MSTRG. 6636. 6  | 2536  | coding    | PF00625 |
| MSTRG. 6638. 2  | 1730  | coding    | PF00211 |
| MSTRG. 6639. 2  | 480   | noncoding | –       |
| MSTRG. 6639. 3  | 439   | noncoding | –       |
| MSTRG. 6640. 3  | 2291  | noncoding | –       |
| MSTRG. 6640. 4  | 13186 | noncoding | –       |
| MSTRG. 6644. 4  | 1912  | coding    | PF13891 |
| MSTRG. 6644. 6  | 2067  | coding    | PF13891 |
| MSTRG. 6644. 7  | 2114  | coding    | PF13891 |

|                |       |           |         |
|----------------|-------|-----------|---------|
| MSTRG. 6644. 8 | 2070  | coding    | PF13891 |
| MSTRG. 6652. 1 | 1024  | noncoding | —       |
| MSTRG. 6660. 1 | 2623  | coding    | PF15726 |
| MSTRG. 6660. 2 | 2348  | coding    | PF12796 |
| MSTRG. 6660. 5 | 6047  | coding    | PF12796 |
| MSTRG. 6661. 5 | 3093  | coding    | PF00365 |
| MSTRG. 6661. 7 | 3327  | coding    | PF00365 |
| MSTRG. 6661. 3 | 3058  | coding    | PF00365 |
| MSTRG. 6662. 6 | 4431  | coding    | PF02902 |
| MSTRG. 6662. 7 | 4464  | coding    | PF02902 |
| MSTRG. 6657. 1 | 3930  | coding    | PF01410 |
| MSTRG. 6670. 1 | 2087  | noncoding | —       |
| MSTRG. 6681. 1 | 12823 | noncoding | —       |
| MSTRG. 6682. 1 | 8820  | coding    | PF00078 |
| MSTRG. 6685. 1 | 2726  | noncoding | —       |
| MSTRG. 6678. 2 | 214   | noncoding | —       |
| MSTRG. 6698. 1 | 355   | noncoding | —       |
| MSTRG. 6705. 1 | 12135 | coding    | PF02994 |
| MSTRG. 6708. 1 | 8962  | noncoding | —       |
| MSTRG. 6709. 1 | 6153  | noncoding | —       |
| MSTRG. 6710. 1 | 3506  | noncoding | —       |
| MSTRG. 6707. 3 | 5798  | noncoding | —       |
| MSTRG. 6707. 4 | 7136  | noncoding | —       |
| MSTRG. 6711. 1 | 2089  | noncoding | —       |
| MSTRG. 6713. 1 | 262   | noncoding | —       |
| MSTRG. 6714. 1 | 2288  | noncoding | —       |
| MSTRG. 6714. 2 | 1951  | noncoding | —       |
| MSTRG. 6714. 3 | 5183  | noncoding | —       |
| MSTRG. 6714. 4 | 3760  | noncoding | —       |
| MSTRG. 6714. 5 | 1478  | noncoding | —       |
| MSTRG. 6715. 1 | 4309  | noncoding | —       |
| MSTRG. 6694. 1 | 3255  | noncoding | —       |
| MSTRG. 6694. 2 | 1648  | noncoding | —       |
| MSTRG. 6695. 1 | 1786  | noncoding | —       |
| MSTRG. 6694. 3 | 8893  | noncoding | —       |
| MSTRG. 6694. 4 | 3408  | noncoding | —       |
| MSTRG. 6726. 2 | 3320  | noncoding | —       |
| MSTRG. 6739. 2 | 7327  | noncoding | —       |
| MSTRG. 6739. 4 | 643   | noncoding | —       |
| MSTRG. 6740. 2 | 5005  | noncoding | —       |
| MSTRG. 6741. 3 | 1362  | noncoding | —       |
| MSTRG. 6741. 4 | 1298  | noncoding | —       |
| MSTRG. 6741. 5 | 1559  | noncoding | —       |
| MSTRG. 6744. 1 | 1320  | coding    | PF00069 |
| MSTRG. 6744. 2 | 1976  | coding    | PF00069 |
| MSTRG. 6748. 3 | 3796  | coding    | PF08742 |
| MSTRG. 6750. 2 | 2407  | noncoding | —       |
| MSTRG. 6756. 1 | 5811  | coding    | PF15089 |
| MSTRG. 6757. 1 | 2848  | noncoding | —       |
| MSTRG. 6760. 1 | 5922  | noncoding | —       |
| MSTRG. 6762. 1 | 10197 | noncoding | —       |
| MSTRG. 6763. 1 | 1930  | noncoding | —       |
| MSTRG. 6761. 4 | 3628  | noncoding | —       |
| MSTRG. 6761. 5 | 3571  | noncoding | —       |



|                 |       |           |         |
|-----------------|-------|-----------|---------|
| MSTRG. 6761. 6  | 3434  | noncoding | —       |
| MSTRG. 6764. 1  | 451   | noncoding | —       |
| MSTRG. 6774. 1  | 5154  | noncoding | —       |
| MSTRG. 6775. 1  | 5694  | noncoding | —       |
| MSTRG. 6776. 1  | 2775  | noncoding | —       |
| MSTRG. 6777. 1  | 1765  | noncoding | —       |
| MSTRG. 6776. 2  | 1429  | noncoding | —       |
| MSTRG. 6777. 2  | 546   | noncoding | —       |
| MSTRG. 6778. 1  | 3076  | noncoding | —       |
| MSTRG. 6777. 3  | 3585  | noncoding | —       |
| MSTRG. 6777. 5  | 5860  | noncoding | —       |
| MSTRG. 6780. 1  | 2408  | coding    | PF02093 |
| MSTRG. 6781. 3  | 946   | noncoding | —       |
| MSTRG. 6781. 4  | 1626  | noncoding | —       |
| MSTRG. 6785. 2  | 2176  | coding    | PF03366 |
| MSTRG. 6786. 1  | 2240  | noncoding | —       |
| MSTRG. 6786. 2  | 708   | noncoding | —       |
| MSTRG. 6792. 5  | 1710  | coding    | PF13920 |
| MSTRG. 6797. 3  | 3776  | coding    | PF04121 |
| MSTRG. 6797. 4  | 1669  | noncoding | —       |
| MSTRG. 6798. 1  | 2354  | noncoding | —       |
| MSTRG. 6800. 1  | 5361  | noncoding | —       |
| MSTRG. 6806. 2  | 3331  | coding    | PF15501 |
| MSTRG. 6804. 1  | 965   | coding    | PF14565 |
| MSTRG. 6817. 3  | 5689  | noncoding | —       |
| MSTRG. 6823. 1  | 3707  | noncoding | —       |
| MSTRG. 6811. 1  | 1592  | noncoding | —       |
| MSTRG. 6811. 2  | 1500  | noncoding | —       |
| MSTRG. 6857. 1  | 17223 | noncoding | —       |
| MSTRG. 6857. 2  | 5758  | coding    | PF00595 |
| MSTRG. 6857. 3  | 5066  | coding    | PF00595 |
| MSTRG. 6857. 4  | 6051  | coding    | PF00595 |
| MSTRG. 6857. 5  | 40847 | noncoding | —       |
| MSTRG. 6857. 6  | 19909 | noncoding | —       |
| MSTRG. 6857. 7  | 31708 | noncoding | —       |
| MSTRG. 6857. 8  | 80663 | noncoding | —       |
| MSTRG. 6859. 1  | 5162  | noncoding | —       |
| MSTRG. 6859. 2  | 10485 | noncoding | —       |
| MSTRG. 6859. 3  | 20457 | noncoding | —       |
| MSTRG. 6859. 4  | 18157 | noncoding | —       |
| MSTRG. 6860. 1  | 9631  | noncoding | —       |
| MSTRG. 6861. 1  | 15402 | noncoding | —       |
| MSTRG. 6861. 2  | 16720 | noncoding | —       |
| MSTRG. 6857. 9  | 45971 | noncoding | —       |
| MSTRG. 6857. 10 | 23811 | noncoding | —       |
| MSTRG. 6857. 11 | 16785 | noncoding | —       |
| MSTRG. 6857. 12 | 16837 | noncoding | —       |
| MSTRG. 6857. 13 | 6125  | noncoding | —       |
| MSTRG. 6857. 14 | 1269  | noncoding | —       |
| MSTRG. 6857. 15 | 41708 | noncoding | —       |
| MSTRG. 6863. 1  | 17379 | noncoding | —       |
| MSTRG. 6864. 1  | 19751 | noncoding | —       |
| MSTRG. 6864. 2  | 2902  | noncoding | —       |
| MSTRG. 6857. 16 | 3542  | noncoding | —       |

|                 |       |           |         |
|-----------------|-------|-----------|---------|
| MSTRG. 6865. 1  | 4823  | noncoding | –       |
| MSTRG. 6857. 17 | 6504  | coding    | PF00595 |
| MSTRG. 6857. 19 | 1713  | coding    | PF00595 |
| MSTRG. 6866. 1  | 5618  | coding    | PF00078 |
| MSTRG. 6857. 20 | 3785  | coding    | PF00595 |
| MSTRG. 6857. 21 | 4197  | coding    | PF00595 |
| MSTRG. 6857. 22 | 2221  | coding    | PF00595 |
| MSTRG. 6857. 23 | 3016  | coding    | PF00595 |
| MSTRG. 6827. 2  | 2708  | coding    | PF01027 |
| MSTRG. 6837. 1  | 2037  | noncoding | –       |
| MSTRG. 6838. 1  | 854   | noncoding | –       |
| MSTRG. 6839. 1  | 2214  | noncoding | –       |
| MSTRG. 6845. 1  | 305   | noncoding | –       |
| MSTRG. 6851. 1  | 2707  | noncoding | –       |
| MSTRG. 6851. 2  | 2155  | noncoding | –       |
| MSTRG. 6852. 1  | 2171  | noncoding | –       |
| MSTRG. 6869. 1  | 2475  | coding    | PF00069 |
| MSTRG. 6871. 2  | 820   | noncoding | –       |
| MSTRG. 6873. 2  | 3154  | coding    | PF15087 |
| MSTRG. 6873. 3  | 3009  | coding    | PF15087 |
| MSTRG. 6884. 1  | 8610  | coding    | PF00620 |
| MSTRG. 6885. 1  | 5434  | noncoding | –       |
| MSTRG. 6886. 1  | 5426  | noncoding | –       |
| MSTRG. 6887. 1  | 6580  | noncoding | –       |
| MSTRG. 6888. 1  | 12726 | noncoding | –       |
| MSTRG. 6901. 1  | 3211  | coding    | PF02994 |
| MSTRG. 6906. 7  | 7343  | coding    | PF00443 |
| MSTRG. 6906. 8  | 1999  | coding    | PF00443 |
| MSTRG. 6906. 9  | 5712  | coding    | PF00443 |
| MSTRG. 6906. 10 | 983   | coding    | PF14836 |
| MSTRG. 6907. 1  | 3509  | noncoding | –       |
| MSTRG. 6902. 1  | 239   | noncoding | –       |
| MSTRG. 6919. 1  | 3718  | noncoding | –       |
| MSTRG. 6920. 1  | 5443  | noncoding | –       |
| MSTRG. 6921. 1  | 3224  | noncoding | –       |
| MSTRG. 6922. 4  | 4523  | noncoding | –       |
| MSTRG. 6922. 3  | 5210  | coding    | PF07679 |
| MSTRG. 6922. 5  | 15303 | noncoding | –       |
| MSTRG. 6923. 1  | 739   | noncoding | –       |
| MSTRG. 6925. 1  | 1374  | noncoding | –       |
| MSTRG. 6925. 2  | 1452  | noncoding | –       |
| MSTRG. 6925. 3  | 910   | noncoding | –       |
| MSTRG. 6926. 1  | 560   | noncoding | –       |
| MSTRG. 6934. 1  | 1984  | noncoding | –       |
| MSTRG. 6939. 3  | 1378  | noncoding | –       |
| MSTRG. 6941. 1  | 1703  | coding    | PF04912 |
| MSTRG. 6941. 2  | 1697  | coding    | PF04912 |
| MSTRG. 6943. 1  | 2104  | noncoding | –       |
| MSTRG. 6943. 2  | 2396  | noncoding | –       |
| MSTRG. 6943. 4  | 1586  | noncoding | –       |
| MSTRG. 6945. 2  | 2695  | coding    | PF00620 |
| MSTRG. 6947. 3  | 3884  | noncoding | –       |
| MSTRG. 6947. 4  | 3788  | noncoding | –       |
| MSTRG. 6947. 6  | 3889  | noncoding | –       |

|                 |      |           |         |
|-----------------|------|-----------|---------|
| MSTRG. 6948. 1  | 6522 | coding    | PF00078 |
| MSTRG. 6947. 7  | 4973 | noncoding | —       |
| MSTRG. 6947. 8  | 2488 | noncoding | —       |
| MSTRG. 6956. 3  | 6712 | coding    | PF00651 |
| MSTRG. 6962. 4  | 808  | coding    | PF01849 |
| MSTRG. 6962. 5  | 1019 | coding    | PF01849 |
| MSTRG. 6966. 4  | 7943 | coding    | PF00439 |
| MSTRG. 6967. 3  | 6244 | coding    | PF00076 |
| MSTRG. 6970. 3  | 4230 | coding    | PF05029 |
| MSTRG. 6973. 5  | 3270 | coding    | PF13423 |
| MSTRG. 6974. 1  | 853  | coding    | PF11938 |
| MSTRG. 6975. 1  | 2875 | coding    | PF00285 |
| MSTRG. 6985. 1  | 8955 | coding    | PF12796 |
| MSTRG. 6986. 1  | 1253 | noncoding | —       |
| MSTRG. 6986. 4  | 1047 | noncoding | —       |
| MSTRG. 6988. 1  | 1067 | noncoding | —       |
| MSTRG. 6997. 1  | 1503 | noncoding | —       |
| MSTRG. 6997. 2  | 1296 | noncoding | —       |
| MSTRG. 6995. 2  | 474  | noncoding | —       |
| MSTRG. 6995. 4  | 541  | noncoding | —       |
| MSTRG. 6995. 3  | 557  | noncoding | —       |
| MSTRG. 6995. 5  | 544  | noncoding | —       |
| MSTRG. 6977. 1  | 686  | coding    | PF01283 |
| MSTRG. 6977. 2  | 1005 | coding    | PF01283 |
| MSTRG. 6977. 3  | 957  | coding    | PF01283 |
| MSTRG. 6977. 4  | 901  | coding    | PF01283 |
| MSTRG. 6977. 5  | 786  | coding    | PF01283 |
| MSTRG. 6980. 3  | 2490 | coding    | PF00174 |
| MSTRG. 6980. 2  | 2777 | coding    | PF00174 |
| MSTRG. 6981. 6  | 3244 | coding    | PF00071 |
| MSTRG. 6981. 4  | 3878 | coding    | PF00071 |
| MSTRG. 6981. 5  | 3937 | coding    | PF00071 |
| MSTRG. 7007. 1  | 5009 | coding    | PF00069 |
| MSTRG. 7007. 2  | 8271 | coding    | PF00069 |
| MSTRG. 7007. 4  | 2445 | coding    | PF00069 |
| MSTRG. 7007. 5  | 7614 | coding    | PF00069 |
| MSTRG. 7008. 2  | 970  | noncoding | —       |
| MSTRG. 7007. 11 | 3410 | coding    | PF00609 |
| MSTRG. 6982. 1  | 1452 | noncoding | —       |
| MSTRG. 6983. 1  | 1210 | noncoding | —       |
| MSTRG. 6982. 3  | 1305 | noncoding | —       |
| MSTRG. 7005. 3  | 948  | noncoding | —       |
| MSTRG. 7006. 1  | 3179 | coding    | PF00019 |
| MSTRG. 7012. 2  | 1808 | coding    | PF00335 |
| MSTRG. 7019. 1  | 3721 | noncoding | —       |
| MSTRG. 7035. 2  | 4148 | coding    | PF13863 |
| MSTRG. 7041. 4  | 884  | noncoding | —       |
| MSTRG. 7044. 1  | 895  | noncoding | —       |
| MSTRG. 7050. 1  | 478  | noncoding | —       |
| MSTRG. 7050. 3  | 623  | noncoding | —       |
| MSTRG. 7050. 2  | 2291 | noncoding | —       |
| MSTRG. 7054. 1  | 225  | noncoding | —       |
| MSTRG. 7075. 4  | 2073 | coding    | PF00640 |
| MSTRG. 7075. 5  | 1093 | noncoding | —       |

|                 |       |           |         |
|-----------------|-------|-----------|---------|
| MSTRG. 7079. 1  | 1826  | coding    | PF12796 |
| MSTRG. 7083. 1  | 580   | noncoding | –       |
| MSTRG. 7077. 3  | 1556  | coding    | PF00022 |
| MSTRG. 7091. 3  | 3934  | noncoding | –       |
| MSTRG. 7091. 5  | 4363  | noncoding | –       |
| MSTRG. 7091. 4  | 4575  | noncoding | –       |
| MSTRG. 7096. 1  | 2799  | noncoding | –       |
| MSTRG. 7102. 1  | 3395  | noncoding | –       |
| MSTRG. 7102. 2  | 3816  | noncoding | –       |
| MSTRG. 7102. 3  | 3245  | noncoding | –       |
| MSTRG. 7103. 1  | 1785  | coding    | PF00178 |
| MSTRG. 7104. 1  | 3162  | coding    | PF07679 |
| MSTRG. 7110. 1  | 405   | noncoding | –       |
| MSTRG. 7111. 3  | 1591  | noncoding | –       |
| MSTRG. 7111. 4  | 1557  | noncoding | –       |
| MSTRG. 7111. 5  | 1332  | noncoding | –       |
| MSTRG. 7118. 2  | 1004  | noncoding | –       |
| MSTRG. 7122. 3  | 796   | coding    | PF00049 |
| MSTRG. 7130. 2  | 6180  | coding    | PF00193 |
| MSTRG. 7130. 3  | 5984  | coding    | PF00193 |
| MSTRG. 7130. 4  | 2144  | coding    | PF00193 |
| MSTRG. 7135. 3  | 838   | coding    | PF14990 |
| MSTRG. 7135. 4  | 451   | coding    | PF14990 |
| MSTRG. 7138. 2  | 3340  | coding    | PF00808 |
| MSTRG. 7141. 1  | 3478  | coding    | PF07992 |
| MSTRG. 7141. 3  | 3425  | coding    | PF07992 |
| MSTRG. 7142. 1  | 4798  | noncoding | –       |
| MSTRG. 7147. 3  | 1097  | noncoding | –       |
| MSTRG. 7147. 2  | 2980  | noncoding | –       |
| MSTRG. 7146. 1  | 255   | noncoding | –       |
| MSTRG. 7154. 2  | 2799  | coding    | PF16746 |
| MSTRG. 7154. 5  | 2814  | coding    | PF16746 |
| MSTRG. 7154. 6  | 3158  | noncoding | –       |
| MSTRG. 7156. 1  | 6242  | coding    | PF00069 |
| MSTRG. 7161. 1  | 3931  | coding    | PF02257 |
| MSTRG. 7161. 2  | 12280 | coding    | PF02257 |
| MSTRG. 7162. 1  | 1811  | noncoding | –       |
| MSTRG. 7164. 1  | 1256  | noncoding | –       |
| MSTRG. 7165. 1  | 1867  | noncoding | –       |
| MSTRG. 7165. 2  | 3498  | noncoding | –       |
| MSTRG. 7166. 1  | 3716  | coding    | PF15475 |
| MSTRG. 7169. 1  | 1097  | noncoding | –       |
| MSTRG. 7177. 1  | 3241  | noncoding | –       |
| MSTRG. 7178. 1  | 2058  | noncoding | –       |
| MSTRG. 7178. 2  | 641   | noncoding | –       |
| MSTRG. 7177. 2  | 3338  | noncoding | –       |
| MSTRG. 7177. 3  | 3196  | noncoding | –       |
| MSTRG. 7177. 4  | 3283  | noncoding | –       |
| MSTRG. 7177. 8  | 3178  | noncoding | –       |
| MSTRG. 7177. 7  | 3476  | noncoding | –       |
| MSTRG. 7177. 6  | 3875  | noncoding | –       |
| MSTRG. 7177. 5  | 3792  | noncoding | –       |
| MSTRG. 7177. 9  | 2502  | noncoding | –       |
| MSTRG. 7177. 10 | 3260  | noncoding | –       |

|                 |       |           |         |
|-----------------|-------|-----------|---------|
| MSTRG. 7177. 11 | 2717  | noncoding | -       |
| MSTRG. 7177. 12 | 2893  | noncoding | -       |
| MSTRG. 7177. 15 | 1682  | noncoding | -       |
| MSTRG. 7177. 16 | 1620  | noncoding | -       |
| MSTRG. 7177. 13 | 3279  | noncoding | -       |
| MSTRG. 7177. 14 | 3365  | noncoding | -       |
| MSTRG. 7177. 18 | 13479 | noncoding | -       |
| MSTRG. 7177. 19 | 4866  | noncoding | -       |
| MSTRG. 7179. 1  | 7196  | noncoding | -       |
| MSTRG. 7172. 1  | 9074  | noncoding | -       |
| MSTRG. 7176. 7  | 3360  | noncoding | -       |
| MSTRG. 7176. 4  | 3424  | noncoding | -       |
| MSTRG. 7176. 5  | 3192  | noncoding | -       |
| MSTRG. 7176. 6  | 3213  | noncoding | -       |
| MSTRG. 7183. 1  | 9818  | coding    | PF01139 |
| MSTRG. 7183. 3  | 4823  | coding    | PF01139 |
| MSTRG. 7189. 1  | 9899  | noncoding | -       |
| MSTRG. 7191. 3  | 3166  | noncoding | -       |
| MSTRG. 7194. 1  | 1975  | noncoding | -       |
| MSTRG. 7195. 1  | 4695  | coding    | PF00965 |
| MSTRG. 7195. 2  | 2541  | coding    | PF00965 |
| MSTRG. 7196. 1  | 13350 | noncoding | -       |
| MSTRG. 7195. 3  | 4367  | coding    | PF00965 |
| MSTRG. 7186. 1  | 481   | noncoding | -       |
| MSTRG. 7197. 3  | 3426  | coding    | PF13775 |
| MSTRG. 7200. 2  | 2438  | coding    | PF00493 |
| MSTRG. 7200. 3  | 2541  | coding    | PF00493 |
| MSTRG. 7202. 1  | 3279  | noncoding | -       |
| MSTRG. 7206. 4  | 5888  | coding    | PF00076 |
| MSTRG. 7206. 5  | 3293  | coding    | PF00076 |
| MSTRG. 7206. 6  | 1602  | coding    | PF00076 |
| MSTRG. 7207. 1  | 4524  | noncoding | -       |
| MSTRG. 7206. 7  | 9169  | noncoding | -       |
| MSTRG. 7211. 1  | 1773  | noncoding | -       |
| MSTRG. 7213. 1  | 1418  | coding    | PF00085 |
| MSTRG. 7216. 2  | 2031  | coding    | PF05091 |
| MSTRG. 7220. 2  | 1202  | noncoding | -       |
| MSTRG. 7220. 3  | 864   | coding    | PF07653 |
| MSTRG. 7220. 4  | 598   | coding    | PF07653 |
| MSTRG. 7225. 1  | 4424  | noncoding | -       |
| MSTRG. 7227. 1  | 2806  | coding    | PF00386 |
| MSTRG. 7232. 2  | 17882 | noncoding | -       |
| MSTRG. 7232. 3  | 13235 | noncoding | -       |
| MSTRG. 7232. 1  | 19555 | coding    | PF13855 |
| MSTRG. 7232. 4  | 17949 | coding    | PF13855 |
| MSTRG. 7232. 5  | 22517 | coding    | PF13855 |
| MSTRG. 7232. 6  | 16380 | noncoding | -       |
| MSTRG. 7235. 3  | 4014  | noncoding | -       |
| MSTRG. 7235. 4  | 2668  | noncoding | -       |
| MSTRG. 7245. 1  | 700   | noncoding | -       |
| MSTRG. 7258. 7  | 4183  | coding    | PF01031 |
| MSTRG. 7258. 6  | 2760  | coding    | PF01031 |
| MSTRG. 7258. 5  | 2814  | coding    | PF01031 |
| MSTRG. 7260. 1  | 3204  | noncoding | -       |

|                 |       |           |         |
|-----------------|-------|-----------|---------|
| MSTRG. 7262. 3  | 5589  | coding    | PF00621 |
| MSTRG. 7262. 5  | 7545  | noncoding | —       |
| MSTRG. 7263. 1  | 13470 | noncoding | —       |
| MSTRG. 7263. 2  | 8104  | noncoding | —       |
| MSTRG. 7264. 1  | 2102  | noncoding | —       |
| MSTRG. 7266. 9  | 6237  | coding    | PF15395 |
| MSTRG. 7266. 12 | 2219  | noncoding | —       |
| MSTRG. 7268. 1  | 452   | noncoding | —       |
| MSTRG. 7269. 5  | 782   | noncoding | —       |
| MSTRG. 7269. 7  | 718   | noncoding | —       |
| MSTRG. 7269. 3  | 1679  | noncoding | —       |
| MSTRG. 7269. 4  | 769   | noncoding | —       |
| MSTRG. 7269. 6  | 9114  | noncoding | —       |
| MSTRG. 7269. 8  | 3271  | noncoding | —       |
| MSTRG. 7269. 9  | 3608  | noncoding | —       |
| MSTRG. 7270. 1  | 1678  | noncoding | —       |
| MSTRG. 7271. 1  | 4198  | noncoding | —       |
| MSTRG. 7277. 1  | 1535  | noncoding | —       |
| MSTRG. 7278. 1  | 6771  | coding    | PF00078 |
| MSTRG. 7279. 1  | 8112  | noncoding | —       |
| MSTRG. 7276. 3  | 11344 | noncoding | —       |
| MSTRG. 7276. 4  | 11063 | coding    | PF02759 |
| MSTRG. 7281. 1  | 287   | noncoding | —       |
| MSTRG. 7281. 2  | 540   | noncoding | —       |
| MSTRG. 7286. 10 | 3536  | coding    | PF12287 |
| MSTRG. 7286. 3  | 3495  | coding    | PF12287 |
| MSTRG. 7286. 5  | 3435  | coding    | PF12287 |
| MSTRG. 7286. 7  | 3229  | coding    | PF12287 |
| MSTRG. 7286. 8  | 3285  | coding    | PF12287 |
| MSTRG. 7286. 9  | 3312  | coding    | PF12287 |
| MSTRG. 7286. 11 | 3381  | coding    | PF12287 |
| MSTRG. 7286. 17 | 1623  | coding    | PF00386 |
| MSTRG. 7292. 1  | 3316  | coding    | PF07993 |
| MSTRG. 7292. 3  | 1301  | coding    | PF07993 |
| MSTRG. 7293. 3  | 6223  | noncoding | —       |
| MSTRG. 7296. 1  | 6432  | noncoding | —       |
| MSTRG. 7297. 3  | 5024  | noncoding | —       |
| MSTRG. 7297. 5  | 5024  | noncoding | —       |
| MSTRG. 7298. 1  | 1752  | coding    | PF15480 |
| MSTRG. 7300. 1  | 6445  | noncoding | —       |
| MSTRG. 7297. 6  | 1926  | coding    | PF01359 |
| MSTRG. 7297. 7  | 6933  | noncoding | —       |
| MSTRG. 7295. 2  | 2327  | noncoding | —       |
| MSTRG. 7303. 1  | 5645  | noncoding | —       |
| MSTRG. 7306. 1  | 2926  | noncoding | —       |
| MSTRG. 7306. 2  | 1074  | noncoding | —       |
| MSTRG. 7316. 1  | 4327  | coding    | PF00078 |
| MSTRG. 7317. 1  | 2818  | noncoding | —       |
| MSTRG. 7322. 4  | 2250  | noncoding | —       |
| MSTRG. 7322. 5  | 1946  | noncoding | —       |
| MSTRG. 7323. 1  | 475   | noncoding | —       |
| MSTRG. 7323. 2  | 880   | noncoding | —       |
| MSTRG. 7325. 1  | 402   | noncoding | —       |
| MSTRG. 7320. 1  | 436   | noncoding | —       |

|                 |       |           |         |
|-----------------|-------|-----------|---------|
| MSTRG. 7320. 2  | 628   | noncoding | -       |
| MSTRG. 7321. 1  | 305   | noncoding | -       |
| MSTRG. 7333. 5  | 2181  | coding    | PF15927 |
| MSTRG. 7335. 2  | 2956  | coding    | PF00505 |
| MSTRG. 7335. 4  | 2969  | coding    | PF00505 |
| MSTRG. 7335. 5  | 3233  | coding    | PF00505 |
| MSTRG. 7335. 8  | 3276  | coding    | PF00505 |
| MSTRG. 7335. 9  | 3300  | coding    | PF00505 |
| MSTRG. 7335. 10 | 2420  | coding    | PF00505 |
| MSTRG. 7335. 11 | 1302  | noncoding | -       |
| MSTRG. 7335. 12 | 1323  | noncoding | -       |
| MSTRG. 7335. 13 | 1148  | noncoding | -       |
| MSTRG. 7340. 2  | 4856  | coding    | PF01633 |
| MSTRG. 7340. 3  | 4604  | noncoding | -       |
| MSTRG. 7340. 4  | 4366  | noncoding | -       |
| MSTRG. 7341. 1  | 264   | noncoding | -       |
| MSTRG. 7342. 1  | 3974  | noncoding | -       |
| MSTRG. 7343. 1  | 3840  | noncoding | -       |
| MSTRG. 7344. 4  | 2252  | noncoding | -       |
| MSTRG. 7346. 1  | 550   | noncoding | -       |
| MSTRG. 7348. 1  | 258   | noncoding | -       |
| MSTRG. 7350. 1  | 1792  | coding    | PF05693 |
| MSTRG. 7354. 2  | 3600  | coding    | PF03137 |
| MSTRG. 7359. 1  | 383   | noncoding | -       |
| MSTRG. 7370. 1  | 5079  | noncoding | -       |
| MSTRG. 7371. 1  | 7826  | noncoding | -       |
| MSTRG. 7369. 3  | 1542  | noncoding | -       |
| MSTRG. 7372. 1  | 6608  | noncoding | -       |
| MSTRG. 7373. 1  | 3861  | noncoding | -       |
| MSTRG. 7374. 1  | 7923  | noncoding | -       |
| MSTRG. 7366. 2  | 3877  | noncoding | -       |
| MSTRG. 7365. 1  | 392   | noncoding | -       |
| MSTRG. 7390. 1  | 1094  | noncoding | -       |
| MSTRG. 7392. 1  | 4953  | noncoding | -       |
| MSTRG. 7393. 1  | 239   | noncoding | -       |
| MSTRG. 7394. 1  | 745   | noncoding | -       |
| MSTRG. 7376. 3  | 1902  | coding    | PF00388 |
| MSTRG. 7376. 5  | 1825  | coding    | PF00388 |
| MSTRG. 7382. 1  | 3073  | noncoding | -       |
| MSTRG. 7385. 1  | 1196  | noncoding | -       |
| MSTRG. 7387. 1  | 5962  | coding    | PF00400 |
| MSTRG. 7415. 2  | 3930  | coding    | PF08416 |
| MSTRG. 7415. 4  | 9285  | coding    | PF02994 |
| MSTRG. 7415. 3  | 10971 | coding    | PF08416 |
| MSTRG. 7415. 5  | 15571 | noncoding | -       |
| MSTRG. 7415. 6  | 11258 | noncoding | -       |
| MSTRG. 7415. 7  | 5828  | coding    | PF08416 |
| MSTRG. 7421. 3  | 1146  | coding    | PF02115 |
| MSTRG. 7423. 4  | 1467  | coding    | PF15047 |
| MSTRG. 7423. 2  | 1701  | coding    | PF15047 |
| MSTRG. 7423. 3  | 1430  | coding    | PF15047 |
| MSTRG. 7426. 1  | 4384  | coding    | PF00211 |
| MSTRG. 7431. 1  | 1589  | coding    | PF04916 |
| MSTRG. 7431. 2  | 1839  | coding    | PF04916 |

|                |       |           |         |
|----------------|-------|-----------|---------|
| MSTRG. 7432. 1 | 2181  | noncoding | -       |
| MSTRG. 7432. 9 | 6151  | coding    | PF16794 |
| MSTRG. 7432. 5 | 8305  | coding    | PF16788 |
| MSTRG. 7432. 6 | 9765  | coding    | PF16788 |
| MSTRG. 7432. 7 | 8146  | coding    | PF16788 |
| MSTRG. 7434. 1 | 582   | noncoding | -       |
| MSTRG. 7429. 1 | 1623  | noncoding | -       |
| MSTRG. 7429. 2 | 1949  | noncoding | -       |
| MSTRG. 7437. 1 | 266   | noncoding | -       |
| MSTRG. 7438. 1 | 2902  | coding    | PF00822 |
| MSTRG. 7439. 4 | 1197  | coding    | PF07803 |
| MSTRG. 7441. 1 | 5113  | noncoding | -       |
| MSTRG. 7448. 1 | 1726  | noncoding | -       |
| MSTRG. 7448. 2 | 767   | noncoding | -       |
| MSTRG. 7452. 1 | 6167  | coding    | PF00782 |
| MSTRG. 7452. 3 | 5766  | coding    | PF00782 |
| MSTRG. 7454. 1 | 3527  | noncoding | -       |
| MSTRG. 7451. 2 | 1980  | noncoding | -       |
| MSTRG. 7455. 1 | 5305  | coding    | PF14670 |
| MSTRG. 7455. 2 | 10131 | coding    | PF14670 |
| MSTRG. 7456. 6 | 2138  | noncoding | -       |
| MSTRG. 7456. 7 | 1788  | noncoding | -       |
| MSTRG. 7456. 8 | 1659  | noncoding | -       |
| MSTRG. 7458. 1 | 423   | noncoding | -       |
| MSTRG. 7457. 3 | 7432  | noncoding | -       |
| MSTRG. 7462. 1 | 381   | noncoding | -       |
| MSTRG. 7467. 1 | 1966  | coding    | PF00313 |
| MSTRG. 7465. 1 | 2955  | coding    | PF07714 |
| MSTRG. 7470. 1 | 298   | noncoding | -       |
| MSTRG. 7474. 2 | 808   | coding    | PF02991 |
| MSTRG. 7476. 1 | 457   | noncoding | -       |
| MSTRG. 7487. 1 | 815   | noncoding | -       |
| MSTRG. 7485. 2 | 1625  | coding    | PF07678 |
| MSTRG. 7499. 1 | 3933  | noncoding | -       |
| MSTRG. 7496. 1 | 855   | noncoding | -       |
| MSTRG. 7501. 1 | 2269  | noncoding | -       |
| MSTRG. 7505. 1 | 4735  | coding    | PF00083 |
| MSTRG. 7505. 2 | 4892  | coding    | PF00083 |
| MSTRG. 7518. 1 | 3186  | noncoding | -       |
| MSTRG. 7529. 1 | 703   | coding    | PF00530 |
| MSTRG. 7529. 2 | 925   | coding    | PF00530 |
| MSTRG. 7531. 1 | 990   | coding    | PF00530 |
| MSTRG. 7534. 1 | 291   | noncoding | -       |
| MSTRG. 7537. 4 | 3230  | noncoding | -       |
| MSTRG. 7538. 1 | 1080  | coding    | PF00431 |
| MSTRG. 7539. 1 | 2384  | coding    | PF00089 |
| MSTRG. 7541. 1 | 1310  | noncoding | -       |
| MSTRG. 7542. 1 | 1271  | noncoding | -       |
| MSTRG. 7539. 2 | 2804  | coding    | PF00089 |
| MSTRG. 7544. 2 | 1015  | coding    | PF03587 |
| MSTRG. 7551. 1 | 4557  | coding    | PF03154 |
| MSTRG. 7551. 2 | 4347  | coding    | PF03154 |
| MSTRG. 7552. 1 | 729   | coding    | PF03154 |
| MSTRG. 7552. 3 | 668   | noncoding | -       |



|                |      |           |         |
|----------------|------|-----------|---------|
| MSTRG. 7552. 2 | 634  | noncoding | -       |
| MSTRG. 7556. 2 | 3799 | noncoding | -       |
| MSTRG. 7557. 1 | 2050 | noncoding | -       |
| MSTRG. 7557. 2 | 1906 | noncoding | -       |
| MSTRG. 7557. 3 | 1632 | noncoding | -       |
| MSTRG. 7557. 4 | 1397 | noncoding | -       |
| MSTRG. 7557. 5 | 1912 | noncoding | -       |
| MSTRG. 7557. 6 | 1638 | noncoding | -       |
| MSTRG. 7560. 3 | 1593 | noncoding | -       |
| MSTRG. 7562. 6 | 2828 | noncoding | -       |
| MSTRG. 7562. 7 | 3336 | noncoding | -       |
| MSTRG. 7562. 8 | 2533 | noncoding | -       |
| MSTRG. 7563. 1 | 2133 | coding    | PF12998 |
| MSTRG. 7563. 2 | 1444 | coding    | PF12998 |
| MSTRG. 7563. 4 | 933  | coding    | PF12998 |
| MSTRG. 7573. 4 | 6126 | coding    | PF08074 |
| MSTRG. 7573. 5 | 6111 | coding    | PF08074 |
| MSTRG. 7585. 1 | 7673 | coding    | PF10244 |
| MSTRG. 7572. 1 | 2161 | coding    | PF00858 |
| MSTRG. 7572. 2 | 2125 | coding    | PF00858 |
| MSTRG. 7580. 2 | 2347 | noncoding | -       |
| MSTRG. 7588. 2 | 1383 | coding    | PF00335 |
| MSTRG. 7591. 2 | 8870 | coding    | PF16164 |
| MSTRG. 7591. 3 | 8741 | coding    | PF16164 |
| MSTRG. 7591. 4 | 1175 | noncoding | -       |
| MSTRG. 7592. 1 | 1415 | coding    | PF04547 |
| MSTRG. 7594. 1 | 614  | noncoding | -       |
| MSTRG. 7597. 2 | 422  | noncoding | -       |
| MSTRG. 7597. 1 | 221  | noncoding | -       |
| MSTRG. 7600. 1 | 3060 | coding    | PF05716 |
| MSTRG. 7604. 3 | 8045 | coding    | PF10154 |
| MSTRG. 7604. 4 | 9449 | coding    | PF10154 |
| MSTRG. 7604. 5 | 5692 | noncoding | -       |
| MSTRG. 7606. 1 | 6388 | coding    | PF00134 |
| MSTRG. 7608. 2 | 4683 | noncoding | -       |
| MSTRG. 7611. 1 | 4131 | coding    | PF00335 |
| MSTRG. 7617. 2 | 3403 | coding    | PF01167 |
| MSTRG. 7618. 3 | 1443 | coding    | PF15319 |
| MSTRG. 7618. 4 | 1610 | coding    | PF15319 |
| MSTRG. 7619. 3 | 3627 | coding    | PF00250 |
| MSTRG. 7621. 1 | 1193 | coding    | PF15046 |
| MSTRG. 7615. 2 | 3262 | coding    | PF15907 |
| MSTRG. 7615. 1 | 2728 | coding    | PF15907 |
| MSTRG. 7615. 3 | 2048 | coding    | PF15907 |
| MSTRG. 7615. 4 | 1906 | coding    | PF15907 |
| MSTRG. 7615. 5 | 2115 | coding    | PF15907 |
| MSTRG. 7616. 2 | 882  | noncoding | -       |
| MSTRG. 7625. 1 | 3886 | coding    | PF01369 |
| MSTRG. 7625. 2 | 3939 | coding    | PF01369 |
| MSTRG. 7626. 1 | 1809 | coding    | PF00209 |
| MSTRG. 7626. 2 | 1929 | coding    | PF00209 |
| MSTRG. 7630. 2 | 6315 | noncoding | -       |
| MSTRG. 7630. 3 | 9173 | coding    | PF08429 |
| MSTRG. 7632. 3 | 1596 | noncoding | -       |

|                 |       |           |         |
|-----------------|-------|-----------|---------|
| MSTRG. 7637. 1  | 3105  | noncoding | –       |
| MSTRG. 7637. 4  | 3135  | noncoding | –       |
| MSTRG. 7637. 5  | 3274  | noncoding | –       |
| MSTRG. 7638. 1  | 3888  | coding    | PF00069 |
| MSTRG. 7638. 10 | 9552  | coding    | PF00069 |
| MSTRG. 7638. 11 | 9078  | coding    | PF00069 |
| MSTRG. 7638. 5  | 9552  | coding    | PF00069 |
| MSTRG. 7638. 6  | 9555  | coding    | PF00069 |
| MSTRG. 7638. 7  | 9636  | coding    | PF00069 |
| MSTRG. 7638. 8  | 9471  | coding    | PF00069 |
| MSTRG. 7638. 9  | 8799  | coding    | PF00069 |
| MSTRG. 7639. 1  | 1382  | coding    | PF00078 |
| MSTRG. 7638. 12 | 8778  | noncoding | –       |
| MSTRG. 7640. 2  | 1893  | coding    | PF04098 |
| MSTRG. 7640. 3  | 2097  | coding    | PF04098 |
| MSTRG. 7642. 1  | 2291  | noncoding | –       |
| MSTRG. 7642. 2  | 27921 | coding    | PF01359 |
| MSTRG. 7642. 3  | 12111 | noncoding | –       |
| MSTRG. 7642. 4  | 5571  | noncoding | –       |
| MSTRG. 7634. 2  | 1736  | noncoding | –       |
| MSTRG. 7635. 1  | 3925  | coding    | PF03006 |
| MSTRG. 7635. 2  | 3466  | coding    | PF03006 |
| MSTRG. 7635. 3  | 1820  | coding    | PF03006 |
| MSTRG. 7635. 5  | 9004  | coding    | PF03006 |
| MSTRG. 7636. 1  | 1923  | noncoding | –       |
| MSTRG. 7636. 2  | 1083  | noncoding | –       |
| MSTRG. 7650. 1  | 8326  | coding    | PF08763 |
| MSTRG. 7646. 1  | 1947  | coding    | PF00962 |
| MSTRG. 7647. 1  | 441   | noncoding | –       |
| MSTRG. 7659. 8  | 1169  | noncoding | –       |
| MSTRG. 7660. 3  | 1595  | coding    | PF06393 |
| MSTRG. 7660. 5  | 1797  | coding    | PF06393 |
| MSTRG. 7666. 1  | 11014 | coding    | PF12130 |
| MSTRG. 7666. 3  | 8099  | coding    | PF00307 |
| MSTRG. 7666. 4  | 7967  | coding    | PF12130 |
| MSTRG. 7666. 5  | 6124  | coding    | PF12130 |
| MSTRG. 7666. 6  | 5581  | noncoding | –       |
| MSTRG. 7665. 1  | 2049  | noncoding | –       |
| MSTRG. 7668. 2  | 5022  | coding    | PF00790 |
| MSTRG. 7668. 3  | 3625  | coding    | PF00790 |
| MSTRG. 7668. 4  | 1559  | coding    | PF00790 |
| MSTRG. 7673. 1  | 1328  | noncoding | –       |
| MSTRG. 7674. 2  | 1408  | noncoding | –       |
| MSTRG. 7675. 2  | 1374  | coding    | PF00169 |
| MSTRG. 7680. 1  | 1583  | noncoding | –       |
| MSTRG. 7686. 3  | 1972  | coding    | PF06456 |
| MSTRG. 7694. 1  | 602   | noncoding | –       |
| MSTRG. 7705. 5  | 3867  | coding    | PF07738 |
| MSTRG. 7703. 1  | 6273  | coding    | PF00354 |
| MSTRG. 7707. 1  | 1499  | coding    | PF08210 |
| MSTRG. 7707. 3  | 1496  | coding    | PF08210 |
| MSTRG. 7711. 4  | 5275  | noncoding | –       |
| MSTRG. 7711. 5  | 3770  | noncoding | –       |
| MSTRG. 7711. 6  | 3897  | noncoding | –       |

|                |       |           |         |
|----------------|-------|-----------|---------|
| MSTRG. 7711. 3 | 4130  | noncoding | –       |
| MSTRG. 7711. 1 | 7521  | noncoding | –       |
| MSTRG. 7717. 2 | 1880  | noncoding | –       |
| MSTRG. 7717. 1 | 2393  | noncoding | –       |
| MSTRG. 7717. 3 | 4535  | noncoding | –       |
| MSTRG. 7717. 4 | 7281  | noncoding | –       |
| MSTRG. 7717. 5 | 630   | noncoding | –       |
| MSTRG. 7717. 8 | 1110  | noncoding | –       |
| MSTRG. 7714. 2 | 4349  | noncoding | –       |
| MSTRG. 7718. 1 | 4693  | noncoding | –       |
| MSTRG. 7722. 2 | 4410  | noncoding | –       |
| MSTRG. 7722. 3 | 4145  | coding    | PF13232 |
| MSTRG. 7723. 1 | 8901  | coding    | PF13232 |
| MSTRG. 7722. 5 | 4648  | noncoding | –       |
| MSTRG. 7722. 6 | 4663  | noncoding | –       |
| MSTRG. 7723. 2 | 10290 | noncoding | –       |
| MSTRG. 7730. 5 | 18041 | coding    | PF16608 |
| MSTRG. 7730. 6 | 22672 | coding    | PF16608 |
| MSTRG. 7731. 1 | 3676  | noncoding | –       |
| MSTRG. 7733. 3 | 3142  | coding    | PF02037 |
| MSTRG. 7737. 1 | 1474  | noncoding | –       |
| MSTRG. 7738. 1 | 4079  | noncoding | –       |
| MSTRG. 7739. 4 | 314   | noncoding | –       |
| MSTRG. 7740. 2 | 804   | coding    | PF00226 |
| MSTRG. 7742. 2 | 1486  | coding    | PF12678 |
| MSTRG. 7742. 3 | 1515  | coding    | PF12678 |
| MSTRG. 7735. 1 | 492   | noncoding | –       |
| MSTRG. 7744. 2 | 8776  | coding    | PF08214 |
| MSTRG. 7745. 1 | 3654  | noncoding | –       |
| MSTRG. 7747. 2 | 5317  | coding    | PF02820 |
| MSTRG. 7747. 3 | 4702  | coding    | PF02820 |
| MSTRG. 7747. 4 | 4936  | coding    | PF02820 |
| MSTRG. 7747. 1 | 5309  | coding    | PF02820 |
| MSTRG. 7747. 5 | 4042  | coding    | PF02820 |
| MSTRG. 7751. 3 | 3407  | coding    | PF07834 |
| MSTRG. 7751. 6 | 3000  | coding    | PF07834 |
| MSTRG. 7751. 7 | 1820  | coding    | PF07834 |
| MSTRG. 7751. 8 | 1864  | coding    | PF07834 |
| MSTRG. 7751. 9 | 1737  | coding    | PF07834 |
| MSTRG. 7752. 1 | 1071  | noncoding | –       |
| MSTRG. 7752. 2 | 1973  | noncoding | –       |
| MSTRG. 7755. 1 | 3924  | noncoding | –       |
| MSTRG. 7755. 3 | 4132  | noncoding | –       |
| MSTRG. 7743. 1 | 4575  | coding    | PF07742 |
| MSTRG. 7758. 1 | 300   | noncoding | –       |
| MSTRG. 7762. 2 | 1945  | coding    | PF05903 |
| MSTRG. 7760. 2 | 1659  | coding    | PF01248 |
| MSTRG. 7767. 1 | 735   | noncoding | –       |
| MSTRG. 7767. 2 | 634   | noncoding | –       |
| MSTRG. 7769. 2 | 3141  | coding    | PF15002 |
| MSTRG. 7770. 1 | 1472  | noncoding | –       |
| MSTRG. 7770. 2 | 652   | noncoding | –       |
| MSTRG. 7771. 4 | 2557  | noncoding | –       |
| MSTRG. 7772. 3 | 6010  | coding    | PF00735 |

|                 |       |           |         |
|-----------------|-------|-----------|---------|
| MSTRG. 7773. 2  | 4879  | coding    | PF10349 |
| MSTRG. 7780. 2  | 547   | coding    | PF10161 |
| MSTRG. 7782. 1  | 2742  | noncoding | —       |
| MSTRG. 7782. 2  | 3399  | noncoding | —       |
| MSTRG. 7782. 3  | 1117  | noncoding | —       |
| MSTRG. 7782. 4  | 7538  | noncoding | —       |
| MSTRG. 7782. 5  | 7009  | noncoding | —       |
| MSTRG. 7782. 8  | 3369  | noncoding | —       |
| MSTRG. 7782. 6  | 8524  | noncoding | —       |
| MSTRG. 7782. 7  | 5161  | noncoding | —       |
| MSTRG. 7782. 9  | 3657  | noncoding | —       |
| MSTRG. 7782. 10 | 1764  | noncoding | —       |
| MSTRG. 7782. 12 | 2429  | noncoding | —       |
| MSTRG. 7782. 13 | 2755  | noncoding | —       |
| MSTRG. 7782. 14 | 1493  | noncoding | —       |
| MSTRG. 7783. 1  | 659   | noncoding | —       |
| MSTRG. 7787. 1  | 2490  | coding    | PF12923 |
| MSTRG. 7790. 3  | 3709  | noncoding | —       |
| MSTRG. 7791. 1  | 1678  | noncoding | —       |
| MSTRG. 7794. 3  | 1291  | noncoding | —       |
| MSTRG. 7795. 1  | 3855  | noncoding | —       |
| MSTRG. 7796. 3  | 1876  | coding    | PF04572 |
| MSTRG. 7796. 5  | 13092 | coding    | PF04572 |
| MSTRG. 7796. 6  | 8387  | noncoding | —       |
| MSTRG. 7796. 7  | 1809  | noncoding | —       |
| MSTRG. 7797. 1  | 2654  | noncoding | —       |
| MSTRG. 7799. 2  | 6380  | coding    | PF14604 |
| MSTRG. 7800. 1  | 760   | noncoding | —       |
| MSTRG. 7801. 2  | 3619  | noncoding | —       |
| MSTRG. 7801. 1  | 4185  | noncoding | —       |
| MSTRG. 7803. 1  | 928   | noncoding | —       |
| MSTRG. 7804. 2  | 1022  | coding    | PF12201 |
| MSTRG. 7805. 1  | 3200  | coding    | PF00698 |
| MSTRG. 7805. 3  | 2034  | noncoding | —       |
| MSTRG. 7805. 4  | 1838  | noncoding | —       |
| MSTRG. 7805. 5  | 1940  | noncoding | —       |
| MSTRG. 7809. 1  | 4900  | noncoding | —       |
| MSTRG. 7812. 1  | 12473 | noncoding | —       |
| MSTRG. 7815. 1  | 1655  | coding    | PF08976 |
| MSTRG. 7815. 3  | 4326  | coding    | PF08976 |
| MSTRG. 7814. 1  | 2395  | coding    | PF00685 |
| MSTRG. 7818. 2  | 1793  | coding    | PF01103 |
| MSTRG. 7818. 3  | 293   | noncoding | —       |
| MSTRG. 7819. 1  | 523   | noncoding | —       |
| MSTRG. 7821. 2  | 623   | noncoding | —       |
| MSTRG. 7825. 2  | 1713  | noncoding | —       |
| MSTRG. 7832. 1  | 6796  | noncoding | —       |
| MSTRG. 7832. 2  | 3354  | noncoding | —       |
| MSTRG. 7840. 1  | 2164  | noncoding | —       |
| MSTRG. 7841. 3  | 2493  | noncoding | —       |
| MSTRG. 7842. 2  | 4268  | coding    | PF02463 |
| MSTRG. 7843. 2  | 1419  | coding    | PF05914 |
| MSTRG. 7844. 1  | 2562  | coding    | PF09759 |
| MSTRG. 7844. 4  | 983   | noncoding | —       |

|                 |       |           |         |
|-----------------|-------|-----------|---------|
| MSTRG. 7844. 3  | 2511  | coding    | PF09759 |
| MSTRG. 7844. 5  | 4637  | coding    | PF09759 |
| MSTRG. 7844. 6  | 2733  | coding    | PF09759 |
| MSTRG. 7848. 1  | 2378  | noncoding | –       |
| MSTRG. 7848. 2  | 301   | noncoding | –       |
| MSTRG. 7854. 5  | 5738  | noncoding | –       |
| MSTRG. 7859. 2  | 9682  | coding    | PF08016 |
| MSTRG. 7859. 3  | 10841 | coding    | PF08016 |
| MSTRG. 7859. 1  | 10908 | coding    | PF08016 |
| MSTRG. 7859. 4  | 10580 | coding    | PF08016 |
| MSTRG. 7859. 8  | 7859  | coding    | PF08016 |
| MSTRG. 7859. 9  | 7877  | coding    | PF08016 |
| MSTRG. 7859. 7  | 8982  | coding    | PF08016 |
| MSTRG. 7859. 5  | 12084 | coding    | PF08016 |
| MSTRG. 7859. 6  | 9490  | coding    | PF08016 |
| MSTRG. 7859. 10 | 9086  | coding    | PF08016 |
| MSTRG. 7859. 11 | 9102  | coding    | PF08016 |
| MSTRG. 7859. 12 | 8374  | coding    | PF08016 |
| MSTRG. 7860. 1  | 987   | coding    | PF08016 |
| MSTRG. 7859. 14 | 630   | noncoding | –       |
| MSTRG. 7859. 13 | 7888  | coding    | PF08016 |
| MSTRG. 7859. 15 | 4278  | noncoding | –       |
| MSTRG. 7859. 16 | 8371  | coding    | PF08016 |
| MSTRG. 7863. 1  | 250   | noncoding | –       |
| MSTRG. 7855. 7  | 3794  | noncoding | –       |
| MSTRG. 7868. 7  | 1366  | noncoding | –       |
| MSTRG. 7870. 1  | 2837  | noncoding | –       |
| MSTRG. 7866. 2  | 3036  | noncoding | –       |
| MSTRG. 7866. 3  | 3229  | noncoding | –       |
| MSTRG. 7874. 1  | 508   | noncoding | –       |
| MSTRG. 7873. 2  | 1727  | noncoding | –       |
| MSTRG. 7879. 1  | 5207  | noncoding | –       |
| MSTRG. 7878. 1  | 4913  | noncoding | –       |
| MSTRG. 7881. 1  | 862   | noncoding | –       |
| MSTRG. 7881. 2  | 512   | noncoding | –       |
| MSTRG. 7884. 1  | 588   | noncoding | –       |
| MSTRG. 7891. 1  | 1315  | noncoding | –       |
| MSTRG. 7898. 2  | 2253  | coding    | PF03901 |
| MSTRG. 7889. 1  | 3174  | coding    | PF00069 |
| MSTRG. 7903. 1  | 10084 | coding    | PF03133 |
| MSTRG. 7903. 2  | 9937  | noncoding | –       |
| MSTRG. 7903. 3  | 4344  | noncoding | –       |
| MSTRG. 7903. 4  | 11340 | noncoding | –       |
| MSTRG. 7905. 6  | 6280  | coding    | PF13087 |
| MSTRG. 7905. 7  | 11256 | coding    | PF01466 |
| MSTRG. 7915. 10 | 1543  | coding    | PF04499 |
| MSTRG. 7915. 11 | 3380  | coding    | PF04499 |
| MSTRG. 7915. 5  | 3917  | coding    | PF04499 |
| MSTRG. 7915. 6  | 3749  | coding    | PF04499 |
| MSTRG. 7915. 7  | 3913  | coding    | PF04499 |
| MSTRG. 7915. 9  | 3883  | coding    | PF04499 |
| MSTRG. 7915. 12 | 4830  | coding    | PF04499 |
| MSTRG. 7917. 3  | 5894  | coding    | PF12335 |
| MSTRG. 7917. 4  | 5654  | coding    | PF12335 |

|                 |       |           |         |
|-----------------|-------|-----------|---------|
| MSTRG. 7913. 1  | 961   | noncoding | –       |
| MSTRG. 7910. 3  | 512   | coding    | PF15191 |
| MSTRG. 7921. 1  | 5063  | coding    | PF00755 |
| MSTRG. 7921. 2  | 4638  | coding    | PF00755 |
| MSTRG. 7921. 4  | 2971  | coding    | PF00755 |
| MSTRG. 7923. 1  | 7122  | coding    | PF07647 |
| MSTRG. 7923. 2  | 4310  | noncoding | –       |
| MSTRG. 7922. 2  | 1311  | coding    | PF00089 |
| MSTRG. 7922. 3  | 1281  | coding    | PF00089 |
| MSTRG. 7926. 2  | 1027  | noncoding | –       |
| MSTRG. 7930. 1  | 3442  | coding    | PF00517 |
| MSTRG. 7933. 1  | 620   | coding    | PF00210 |
| MSTRG. 7933. 2  | 548   | noncoding | –       |
| MSTRG. 7932. 1  | 250   | noncoding | –       |
| MSTRG. 7939. 1  | 1196  | coding    | PF11176 |
| MSTRG. 7939. 2  | 5918  | coding    | PF11176 |
| MSTRG. 7939. 3  | 5673  | coding    | PF11176 |
| MSTRG. 7939. 4  | 1923  | noncoding | –       |
| MSTRG. 7935. 2  | 2398  | coding    | PF00456 |
| MSTRG. 7943. 1  | 884   | noncoding | –       |
| MSTRG. 7944. 3  | 4570  | noncoding | –       |
| MSTRG. 7944. 4  | 5544  | coding    | PF04410 |
| MSTRG. 7944. 5  | 3951  | coding    | PF04410 |
| MSTRG. 7944. 6  | 3457  | coding    | PF04410 |
| MSTRG. 7945. 1  | 1819  | noncoding | –       |
| MSTRG. 7944. 7  | 2017  | coding    | PF01359 |
| MSTRG. 7958. 1  | 1215  | noncoding | –       |
| MSTRG. 7962. 1  | 5490  | noncoding | –       |
| MSTRG. 7984. 1  | 1306  | noncoding | –       |
| MSTRG. 7985. 1  | 739   | noncoding | –       |
| MSTRG. 7990. 1  | 3483  | noncoding | –       |
| MSTRG. 7995. 1  | 15776 | noncoding | –       |
| MSTRG. 7996. 1  | 5064  | noncoding | –       |
| MSTRG. 7996. 2  | 4573  | noncoding | –       |
| MSTRG. 7997. 1  | 4484  | noncoding | –       |
| MSTRG. 7998. 1  | 6987  | noncoding | –       |
| MSTRG. 7988. 15 | 1070  | noncoding | –       |
| MSTRG. 7988. 13 | 2225  | noncoding | –       |
| MSTRG. 7988. 12 | 1308  | noncoding | –       |
| MSTRG. 7988. 14 | 1197  | noncoding | –       |
| MSTRG. 7988. 11 | 6916  | coding    | PF00233 |
| MSTRG. 7988. 16 | 1366  | noncoding | –       |
| MSTRG. 7988. 18 | 1037  | noncoding | –       |
| MSTRG. 7988. 20 | 4479  | noncoding | –       |
| MSTRG. 7988. 22 | 7327  | noncoding | –       |
| MSTRG. 8002. 1  | 2927  | noncoding | –       |
| MSTRG. 8002. 2  | 7786  | noncoding | –       |
| MSTRG. 8016. 1  | 2624  | noncoding | –       |
| MSTRG. 8019. 1  | 4512  | noncoding | –       |
| MSTRG. 8020. 1  | 4920  | noncoding | –       |
| MSTRG. 8022. 1  | 1025  | noncoding | –       |
| MSTRG. 8023. 1  | 5107  | noncoding | –       |
| MSTRG. 8020. 4  | 906   | noncoding | –       |
| MSTRG. 8020. 5  | 785   | noncoding | –       |

|                 |       |           |         |
|-----------------|-------|-----------|---------|
| MSTRG. 8025. 1  | 5547  | coding    | PF05556 |
| MSTRG. 8024. 7  | 2952  | noncoding | –       |
| MSTRG. 8026. 1  | 10249 | noncoding | –       |
| MSTRG. 8027. 1  | 623   | noncoding | –       |
| MSTRG. 8029. 1  | 3629  | coding    | PF04811 |
| MSTRG. 8029. 2  | 3510  | coding    | PF04811 |
| MSTRG. 8031. 1  | 4857  | noncoding | –       |
| MSTRG. 8032. 2  | 2866  | coding    | PF05063 |
| MSTRG. 8010. 1  | 214   | noncoding | –       |
| MSTRG. 8060. 1  | 1416  | noncoding | –       |
| MSTRG. 8071. 1  | 334   | noncoding | –       |
| MSTRG. 8074. 1  | 1275  | noncoding | –       |
| MSTRG. 8096. 1  | 11359 | noncoding | –       |
| MSTRG. 8096. 2  | 8449  | coding    | PF12796 |
| MSTRG. 8096. 3  | 8776  | coding    | PF12796 |
| MSTRG. 8096. 4  | 8403  | coding    | PF12796 |
| MSTRG. 8096. 11 | 8173  | coding    | PF12796 |
| MSTRG. 8096. 12 | 17856 | coding    | PF12796 |
| MSTRG. 8096. 6  | 7988  | coding    | PF12796 |
| MSTRG. 8096. 10 | 8915  | coding    | PF12796 |
| MSTRG. 8096. 5  | 8225  | coding    | PF12796 |
| MSTRG. 8096. 7  | 8240  | coding    | PF12796 |
| MSTRG. 8096. 8  | 9975  | coding    | PF12796 |
| MSTRG. 8096. 9  | 8481  | coding    | PF12796 |
| MSTRG. 8096. 13 | 4644  | coding    | PF00791 |
| MSTRG. 8096. 14 | 7085  | coding    | PF12796 |
| MSTRG. 8097. 1  | 5545  | noncoding | –       |
| MSTRG. 8098. 1  | 20310 | noncoding | –       |
| MSTRG. 8098. 2  | 19103 | noncoding | –       |
| MSTRG. 8099. 1  | 14009 | noncoding | –       |
| MSTRG. 8098. 3  | 3733  | noncoding | –       |
| MSTRG. 8100. 1  | 24349 | noncoding | –       |
| MSTRG. 8096. 15 | 25384 | noncoding | –       |
| MSTRG. 8096. 16 | 28985 | noncoding | –       |
| MSTRG. 8096. 17 | 26229 | noncoding | –       |
| MSTRG. 8096. 18 | 26274 | noncoding | –       |
| MSTRG. 8096. 19 | 22992 | noncoding | –       |
| MSTRG. 8096. 20 | 19100 | noncoding | –       |
| MSTRG. 8096. 21 | 8019  | noncoding | –       |
| MSTRG. 8096. 22 | 12057 | noncoding | –       |
| MSTRG. 8083. 1  | 3601  | coding    | PF00078 |
| MSTRG. 8086. 1  | 528   | noncoding | –       |
| MSTRG. 8103. 1  | 1426  | noncoding | –       |
| MSTRG. 8109. 3  | 1797  | coding    | PF04678 |
| MSTRG. 8110. 2  | 4061  | coding    | PF04811 |
| MSTRG. 8110. 4  | 3938  | coding    | PF04811 |
| MSTRG. 8110. 6  | 4454  | coding    | PF04811 |
| MSTRG. 8110. 5  | 3992  | coding    | PF04811 |
| MSTRG. 8113. 1  | 531   | noncoding | –       |
| MSTRG. 8119. 1  | 2749  | noncoding | –       |
| MSTRG. 8119. 2  | 18777 | noncoding | –       |
| MSTRG. 8130. 1  | 2360  | noncoding | –       |
| MSTRG. 8131. 3  | 2210  | coding    | PF08347 |
| MSTRG. 8131. 4  | 2491  | coding    | PF08347 |

|                 |       |           |         |
|-----------------|-------|-----------|---------|
| MSTRG. 8131. 5  | 2067  | coding    | PF08347 |
| MSTRG. 8131. 6  | 2026  | coding    | PF08347 |
| MSTRG. 8131. 7  | 1666  | coding    | PF08347 |
| MSTRG. 8117. 3  | 1787  | coding    | PF01747 |
| MSTRG. 8143. 1  | 1396  | coding    | PF01588 |
| MSTRG. 8145. 1  | 792   | noncoding | —       |
| MSTRG. 8146. 1  | 370   | noncoding | —       |
| MSTRG. 8147. 2  | 1725  | noncoding | —       |
| MSTRG. 8160. 2  | 260   | noncoding | —       |
| MSTRG. 8160. 1  | 13637 | noncoding | —       |
| MSTRG. 8160. 3  | 2629  | noncoding | —       |
| MSTRG. 8160. 4  | 12349 | noncoding | —       |
| MSTRG. 8165. 1  | 8216  | coding    | PF00225 |
| MSTRG. 8165. 3  | 7947  | coding    | PF00225 |
| MSTRG. 8171. 1  | 352   | noncoding | —       |
| MSTRG. 8171. 2  | 475   | noncoding | —       |
| MSTRG. 8172. 11 | 4324  | noncoding | —       |
| MSTRG. 8172. 7  | 1350  | noncoding | —       |
| MSTRG. 8172. 6  | 2336  | noncoding | —       |
| MSTRG. 8172. 9  | 1821  | noncoding | —       |
| MSTRG. 8172. 10 | 2532  | noncoding | —       |
| MSTRG. 8172. 5  | 2168  | noncoding | —       |
| MSTRG. 8172. 8  | 15150 | noncoding | —       |
| MSTRG. 8172. 4  | 1847  | noncoding | —       |
| MSTRG. 8172. 3  | 2474  | noncoding | —       |
| MSTRG. 8172. 13 | 2683  | noncoding | —       |
| MSTRG. 8172. 12 | 11308 | noncoding | —       |
| MSTRG. 8172. 14 | 4432  | noncoding | —       |
| MSTRG. 8172. 15 | 7152  | noncoding | —       |
| MSTRG. 8185. 2  | 2412  | coding    | PF00179 |
| MSTRG. 8185. 1  | 4507  | coding    | PF00179 |
| MSTRG. 8185. 3  | 1764  | coding    | PF00179 |
| MSTRG. 8195. 1  | 4468  | coding    | PF00554 |
| MSTRG. 8195. 2  | 4620  | coding    | PF00554 |
| MSTRG. 8190. 2  | 488   | noncoding | —       |
| MSTRG. 8198. 1  | 382   | noncoding | —       |
| MSTRG. 8201. 1  | 3043  | noncoding | —       |
| MSTRG. 8201. 2  | 6363  | noncoding | —       |
| MSTRG. 8202. 1  | 5647  | noncoding | —       |
| MSTRG. 8200. 2  | 4812  | coding    | PF00149 |
| MSTRG. 8200. 3  | 1942  | noncoding | —       |
| MSTRG. 8203. 1  | 278   | noncoding | —       |
| MSTRG. 8209. 1  | 2319  | noncoding | —       |
| MSTRG. 8209. 2  | 746   | noncoding | —       |
| MSTRG. 8210. 1  | 324   | noncoding | —       |
| MSTRG. 8218. 1  | 3615  | noncoding | —       |
| MSTRG. 8219. 1  | 341   | noncoding | —       |
| MSTRG. 8224. 3  | 1400  | coding    | PF15256 |
| MSTRG. 8221. 1  | 372   | noncoding | —       |
| MSTRG. 8221. 2  | 388   | noncoding | —       |
| MSTRG. 8238. 1  | 1860  | coding    | PF01652 |
| MSTRG. 8238. 2  | 2445  | coding    | PF01652 |
| MSTRG. 8238. 5  | 1707  | coding    | PF01652 |
| MSTRG. 8238. 6  | 2354  | coding    | PF01652 |



|                 |       |           |         |
|-----------------|-------|-----------|---------|
| MSTRG. 8238. 7  | 2052  | coding    | PF01652 |
| MSTRG. 8238. 8  | 2385  | coding    | PF01652 |
| MSTRG. 8239. 1  | 9995  | noncoding | -       |
| MSTRG. 8241. 3  | 10966 | noncoding | -       |
| MSTRG. 8241. 2  | 3177  | coding    | PF00335 |
| MSTRG. 8241. 4  | 1305  | coding    | PF00335 |
| MSTRG. 8242. 1  | 43372 | noncoding | -       |
| MSTRG. 8241. 5  | 2442  | coding    | PF00335 |
| MSTRG. 8241. 6  | 1426  | coding    | PF00335 |
| MSTRG. 8244. 1  | 828   | noncoding | -       |
| MSTRG. 8241. 7  | 1306  | coding    | PF00335 |
| MSTRG. 8241. 8  | 2481  | coding    | PF00335 |
| MSTRG. 8246. 2  | 933   | noncoding | -       |
| MSTRG. 8246. 6  | 1398  | noncoding | -       |
| MSTRG. 8246. 5  | 1778  | noncoding | -       |
| MSTRG. 8246. 4  | 1863  | noncoding | -       |
| MSTRG. 8248. 1  | 3355  | noncoding | -       |
| MSTRG. 8246. 7  | 1949  | noncoding | -       |
| MSTRG. 8249. 1  | 1079  | noncoding | -       |
| MSTRG. 8255. 1  | 281   | noncoding | -       |
| MSTRG. 8283. 3  | 4924  | coding    | PF00412 |
| MSTRG. 8283. 5  | 4455  | coding    | PF00412 |
| MSTRG. 8283. 6  | 4156  | coding    | PF00412 |
| MSTRG. 8283. 7  | 4771  | coding    | PF00412 |
| MSTRG. 8283. 8  | 662   | coding    | PF00595 |
| MSTRG. 8283. 9  | 5221  | coding    | PF00595 |
| MSTRG. 8283. 10 | 3112  | noncoding | -       |
| MSTRG. 8283. 12 | 17695 | noncoding | -       |
| MSTRG. 8283. 13 | 11259 | noncoding | -       |
| MSTRG. 8285. 3  | 5948  | coding    | PF00176 |
| MSTRG. 8395. 1  | 231   | noncoding | -       |
| MSTRG. 8397. 1  | 649   | noncoding | -       |
| MSTRG. 8409. 1  | 6064  | noncoding | -       |
| MSTRG. 8410. 1  | 1072  | noncoding | -       |
| MSTRG. 8411. 1  | 7198  | coding    | PF00078 |
| MSTRG. 8412. 1  | 1995  | noncoding | -       |
| MSTRG. 8417. 2  | 3330  | noncoding | -       |
| MSTRG. 8419. 1  | 2285  | noncoding | -       |
| MSTRG. 8394. 2  | 6244  | noncoding | -       |
| MSTRG. 8394. 3  | 644   | noncoding | -       |
| MSTRG. 8420. 1  | 7284  | noncoding | -       |
| MSTRG. 8422. 1  | 2437  | noncoding | -       |
| MSTRG. 8423. 1  | 1181  | noncoding | -       |
| MSTRG. 8424. 1  | 9786  | noncoding | -       |
| MSTRG. 8425. 1  | 2449  | noncoding | -       |
| MSTRG. 8394. 4  | 1662  | noncoding | -       |
| MSTRG. 8394. 5  | 5581  | noncoding | -       |
| MSTRG. 8394. 6  | 17583 | noncoding | -       |
| MSTRG. 8394. 7  | 2977  | noncoding | -       |
| MSTRG. 8394. 8  | 1181  | noncoding | -       |
| MSTRG. 8394. 9  | 3858  | noncoding | -       |
| MSTRG. 8282. 1  | 216   | noncoding | -       |
| MSTRG. 8309. 1  | 3274  | noncoding | -       |
| MSTRG. 8315. 1  | 613   | noncoding | -       |

|                 |       |           |         |
|-----------------|-------|-----------|---------|
| MSTRG. 8316. 1  | 1918  | noncoding | –       |
| MSTRG. 8315. 2  | 14760 | noncoding | –       |
| MSTRG. 8324. 3  | 733   | coding    | PF01387 |
| MSTRG. 8324. 4  | 591   | coding    | PF01387 |
| MSTRG. 8333. 2  | 1633  | noncoding | –       |
| MSTRG. 8333. 3  | 5997  | coding    | PF00481 |
| MSTRG. 8333. 4  | 6342  | coding    | PF00481 |
| MSTRG. 8333. 5  | 6861  | coding    | PF00481 |
| MSTRG. 8337. 1  | 462   | noncoding | –       |
| MSTRG. 8338. 2  | 1279  | noncoding | –       |
| MSTRG. 8346. 2  | 2267  | coding    | PF00883 |
| MSTRG. 8349. 6  | 6783  | coding    | PF11594 |
| MSTRG. 8351. 1  | 848   | noncoding | –       |
| MSTRG. 8351. 5  | 6597  | noncoding | –       |
| MSTRG. 8352. 3  | 2983  | coding    | PF12719 |
| MSTRG. 8352. 4  | 1266  | coding    | PF12719 |
| MSTRG. 8353. 1  | 8096  | coding    | PF15090 |
| MSTRG. 8353. 2  | 9030  | coding    | PF15090 |
| MSTRG. 8353. 4  | 9057  | noncoding | –       |
| MSTRG. 8353. 6  | 8424  | noncoding | –       |
| MSTRG. 8353. 5  | 4570  | noncoding | –       |
| MSTRG. 8353. 7  | 2534  | noncoding | –       |
| MSTRG. 8353. 8  | 2467  | noncoding | –       |
| MSTRG. 8354. 1  | 3323  | noncoding | –       |
| MSTRG. 8355. 1  | 1092  | noncoding | –       |
| MSTRG. 8356. 1  | 2103  | noncoding | –       |
| MSTRG. 8340. 1  | 985   | noncoding | –       |
| MSTRG. 8343. 1  | 271   | noncoding | –       |
| MSTRG. 8359. 5  | 1147  | coding    | PF10274 |
| MSTRG. 8359. 3  | 3819  | coding    | PF10274 |
| MSTRG. 8359. 4  | 1708  | coding    | PF10274 |
| MSTRG. 8360. 1  | 337   | noncoding | –       |
| MSTRG. 8365. 1  | 3590  | noncoding | –       |
| MSTRG. 8358. 1  | 638   | noncoding | –       |
| MSTRG. 8386. 1  | 4416  | coding    | PF13855 |
| MSTRG. 8387. 1  | 455   | noncoding | –       |
| MSTRG. 8392. 1  | 714   | noncoding | –       |
| MSTRG. 8432. 1  | 12798 | noncoding | –       |
| MSTRG. 8430. 1  | 879   | noncoding | –       |
| MSTRG. 8444. 1  | 3691  | coding    | PF00454 |
| MSTRG. 8444. 2  | 1883  | coding    | PF00454 |
| MSTRG. 8444. 3  | 2364  | coding    | PF00454 |
| MSTRG. 8444. 7  | 2536  | coding    | PF00454 |
| MSTRG. 8444. 5  | 3291  | coding    | PF00454 |
| MSTRG. 8444. 6  | 2538  | coding    | PF00454 |
| MSTRG. 8444. 8  | 2745  | coding    | PF00454 |
| MSTRG. 8444. 9  | 3256  | coding    | PF00454 |
| MSTRG. 8444. 10 | 2509  | coding    | PF00454 |
| MSTRG. 8444. 11 | 2482  | coding    | PF00454 |
| MSTRG. 8445. 1  | 3167  | coding    | PF12896 |
| MSTRG. 8445. 3  | 2091  | coding    | PF12896 |
| MSTRG. 8437. 1  | 4008  | noncoding | –       |
| MSTRG. 8439. 2  | 1096  | noncoding | –       |
| MSTRG. 8446. 5  | 2670  | coding    | PF09270 |

|                 |       |           |         |
|-----------------|-------|-----------|---------|
| MSTRG. 8446. 7  | 1494  | coding    | PF09270 |
| MSTRG. 8460. 1  | 235   | noncoding | —       |
| MSTRG. 8482. 1  | 2937  | noncoding | —       |
| MSTRG. 8486. 1  | 733   | noncoding | —       |
| MSTRG. 8488. 1  | 480   | noncoding | —       |
| MSTRG. 8488. 2  | 615   | noncoding | —       |
| MSTRG. 8488. 3  | 941   | noncoding | —       |
| MSTRG. 8488. 4  | 548   | noncoding | —       |
| MSTRG. 8495. 1  | 762   | noncoding | —       |
| MSTRG. 8494. 5  | 3154  | coding    | PF00566 |
| MSTRG. 8493. 1  | 225   | noncoding | —       |
| MSTRG. 8499. 1  | 4661  | noncoding | —       |
| MSTRG. 8506. 1  | 11951 | coding    | PF05334 |
| MSTRG. 8507. 1  | 1901  | noncoding | —       |
| MSTRG. 8508. 1  | 3036  | noncoding | —       |
| MSTRG. 8509. 1  | 1725  | noncoding | —       |
| MSTRG. 8512. 2  | 3617  | coding    | PF07707 |
| MSTRG. 8512. 3  | 3716  | coding    | PF07707 |
| MSTRG. 8512. 4  | 3114  | coding    | PF07707 |
| MSTRG. 8502. 3  | 8455  | coding    | PF08519 |
| MSTRG. 8515. 3  | 1838  | noncoding | —       |
| MSTRG. 8517. 2  | 1264  | coding    | PF16881 |
| MSTRG. 8520. 1  | 2123  | noncoding | —       |
| MSTRG. 8521. 1  | 1719  | noncoding | —       |
| MSTRG. 8522. 1  | 500   | noncoding | —       |
| MSTRG. 8524. 1  | 3197  | noncoding | —       |
| MSTRG. 8526. 2  | 8650  | noncoding | —       |
| MSTRG. 8527. 1  | 5316  | noncoding | —       |
| MSTRG. 8526. 3  | 1140  | noncoding | —       |
| MSTRG. 8528. 1  | 959   | noncoding | —       |
| MSTRG. 8529. 1  | 7129  | coding    | PF08590 |
| MSTRG. 8529. 2  | 7231  | coding    | PF08590 |
| MSTRG. 8529. 3  | 7061  | coding    | PF08590 |
| MSTRG. 8529. 4  | 11546 | coding    | PF08590 |
| MSTRG. 8529. 5  | 6557  | coding    | PF08590 |
| MSTRG. 8529. 7  | 6889  | coding    | PF08590 |
| MSTRG. 8534. 9  | 4551  | coding    | PF00076 |
| MSTRG. 8534. 10 | 5129  | coding    | PF00076 |
| MSTRG. 8534. 11 | 2801  | coding    | PF00076 |
| MSTRG. 8536. 1  | 13322 | noncoding | —       |
| MSTRG. 8536. 2  | 4170  | noncoding | —       |
| MSTRG. 8538. 5  | 2111  | coding    | PF01189 |
| MSTRG. 8539. 3  | 5492  | coding    | PF00640 |
| MSTRG. 8539. 4  | 5570  | coding    | PF00640 |
| MSTRG. 8539. 5  | 3609  | coding    | PF00640 |
| MSTRG. 8543. 1  | 705   | noncoding | —       |
| MSTRG. 8544. 1  | 841   | noncoding | —       |
| MSTRG. 8542. 2  | 3250  | noncoding | —       |
| MSTRG. 8547. 1  | 1638  | noncoding | —       |
| MSTRG. 8548. 3  | 5560  | noncoding | —       |
| MSTRG. 8548. 2  | 5371  | noncoding | —       |
| MSTRG. 8556. 1  | 335   | noncoding | —       |
| MSTRG. 8557. 3  | 6111  | coding    | PF16212 |
| MSTRG. 8557. 2  | 12584 | coding    | PF16212 |

|                 |      |           |         |
|-----------------|------|-----------|---------|
| MSTRG. 8557. 5  | 8576 | coding    | PF16212 |
| MSTRG. 8554. 1  | 633  | noncoding | —       |
| MSTRG. 8555. 1  | 786  | noncoding | —       |
| MSTRG. 8565. 1  | 1716 | noncoding | —       |
| MSTRG. 8565. 2  | 1010 | noncoding | —       |
| MSTRG. 8566. 1  | 464  | noncoding | —       |
| MSTRG. 8566. 2  | 296  | noncoding | —       |
| MSTRG. 8585. 1  | 300  | noncoding | —       |
| MSTRG. 8587. 1  | 356  | noncoding | —       |
| MSTRG. 8589. 1  | 2917 | coding    | PF00078 |
| MSTRG. 8586. 1  | 567  | noncoding | —       |
| MSTRG. 8591. 2  | 2986 | noncoding | —       |
| MSTRG. 8594. 2  | 5679 | coding    | PF16212 |
| MSTRG. 8595. 1  | 322  | noncoding | —       |
| MSTRG. 8598. 3  | 3546 | noncoding | —       |
| MSTRG. 8598. 4  | 3549 | noncoding | —       |
| MSTRG. 8600. 3  | 6484 | coding    | PF15301 |
| MSTRG. 8601. 1  | 924  | noncoding | —       |
| MSTRG. 8604. 1  | 1159 | noncoding | —       |
| MSTRG. 8604. 2  | 847  | noncoding | —       |
| MSTRG. 8605. 4  | 1167 | coding    | PF07051 |
| MSTRG. 8605. 8  | 971  | coding    | PF07051 |
| MSTRG. 8605. 5  | 1483 | coding    | PF07051 |
| MSTRG. 8605. 6  | 4345 | coding    | PF07051 |
| MSTRG. 8606. 3  | 4280 | coding    | PF03556 |
| MSTRG. 8606. 5  | 4198 | coding    | PF03556 |
| MSTRG. 8606. 4  | 4249 | coding    | PF03556 |
| MSTRG. 8608. 1  | 7482 | noncoding | —       |
| MSTRG. 8611. 3  | 1859 | coding    | PF16026 |
| MSTRG. 8613. 1  | 593  | noncoding | —       |
| MSTRG. 8617. 1  | 3792 | noncoding | —       |
| MSTRG. 8614. 2  | 2232 | coding    | PF00071 |
| MSTRG. 8614. 3  | 1422 | coding    | PF00071 |
| MSTRG. 8624. 10 | 4645 | coding    | PF05182 |
| MSTRG. 8624. 11 | 4728 | coding    | PF05182 |
| MSTRG. 8624. 12 | 4684 | coding    | PF05182 |
| MSTRG. 8624. 13 | 4726 | coding    | PF05182 |
| MSTRG. 8620. 1  | 413  | noncoding | —       |
| MSTRG. 8629. 1  | 902  | noncoding | —       |
| MSTRG. 8630. 1  | 1943 | noncoding | —       |
| MSTRG. 8630. 2  | 3983 | noncoding | —       |
| MSTRG. 8632. 1  | 420  | noncoding | —       |
| MSTRG. 8645. 5  | 3214 | coding    | PF14598 |
| MSTRG. 8645. 4  | 3497 | coding    | PF14598 |
| MSTRG. 8645. 6  | 3949 | coding    | PF14598 |
| MSTRG. 8646. 1  | 1103 | noncoding | —       |
| MSTRG. 8642. 2  | 760  | noncoding | —       |
| MSTRG. 8647. 1  | 7171 | coding    | PF09763 |
| MSTRG. 8647. 3  | 3307 | coding    | PF09763 |
| MSTRG. 8648. 1  | 5178 | noncoding | —       |
| MSTRG. 8650. 2  | 5011 | coding    | PF15262 |
| MSTRG. 8650. 1  | 6989 | coding    | PF15262 |
| MSTRG. 8650. 4  | 652  | noncoding | —       |
| MSTRG. 8650. 3  | 6532 | coding    | PF15262 |

|                 |       |           |         |
|-----------------|-------|-----------|---------|
| MSTRG. 8656. 3  | 3794  | coding    | PF00501 |
| MSTRG. 8657. 1  | 5607  | coding    | PF01259 |
| MSTRG. 8657. 2  | 3486  | coding    | PF01259 |
| MSTRG. 8658. 1  | 9642  | coding    | PF00078 |
| MSTRG. 8658. 3  | 5900  | coding    | PF00078 |
| MSTRG. 8657. 3  | 5300  | coding    | PF01259 |
| MSTRG. 8657. 4  | 5144  | coding    | PF01259 |
| MSTRG. 8657. 6  | 5546  | coding    | PF01259 |
| MSTRG. 8657. 7  | 2714  | coding    | PF01259 |
| MSTRG. 8659. 2  | 1058  | noncoding | —       |
| MSTRG. 8660. 2  | 4024  | noncoding | —       |
| MSTRG. 8660. 3  | 3942  | noncoding | —       |
| MSTRG. 8660. 4  | 4308  | noncoding | —       |
| MSTRG. 8660. 10 | 5145  | noncoding | —       |
| MSTRG. 8660. 11 | 3501  | noncoding | —       |
| MSTRG. 8660. 8  | 3590  | noncoding | —       |
| MSTRG. 8660. 9  | 3672  | noncoding | —       |
| MSTRG. 8652. 1  | 2233  | coding    | PF14912 |
| MSTRG. 8652. 2  | 1883  | coding    | PF14912 |
| MSTRG. 8674. 2  | 5024  | noncoding | —       |
| MSTRG. 8674. 1  | 6975  | noncoding | —       |
| MSTRG. 8674. 3  | 7957  | noncoding | —       |
| MSTRG. 8674. 4  | 6969  | noncoding | —       |
| MSTRG. 8674. 8  | 2152  | noncoding | —       |
| MSTRG. 8674. 7  | 6522  | noncoding | —       |
| MSTRG. 8677. 5  | 628   | noncoding | —       |
| MSTRG. 8677. 3  | 751   | coding    | PF00050 |
| MSTRG. 8677. 4  | 457   | noncoding | —       |
| MSTRG. 8677. 8  | 809   | noncoding | —       |
| MSTRG. 8677. 9  | 812   | noncoding | —       |
| MSTRG. 8677. 10 | 653   | coding    | PF00050 |
| MSTRG. 8678. 2  | 2276  | noncoding | —       |
| MSTRG. 8680. 3  | 3626  | coding    | PF00562 |
| MSTRG. 8680. 2  | 3654  | coding    | PF00562 |
| MSTRG. 8686. 1  | 321   | noncoding | —       |
| MSTRG. 8701. 1  | 10370 | coding    | PF02354 |
| MSTRG. 8701. 2  | 11309 | coding    | PF02354 |
| MSTRG. 8716. 1  | 2466  | coding    | PF01404 |
| MSTRG. 8713. 1  | 233   | noncoding | —       |
| MSTRG. 8732. 1  | 2657  | noncoding | —       |
| MSTRG. 8733. 1  | 511   | noncoding | —       |
| MSTRG. 8733. 2  | 2303  | noncoding | —       |
| MSTRG. 8733. 3  | 2130  | noncoding | —       |
| MSTRG. 8734. 1  | 3940  | coding    | PF10585 |
| MSTRG. 8729. 1  | 635   | coding    | PF00956 |
| MSTRG. 8742. 1  | 3023  | coding    | PF04146 |
| MSTRG. 8742. 3  | 2660  | coding    | PF04146 |
| MSTRG. 8742. 6  | 4582  | coding    | PF04146 |
| MSTRG. 8742. 7  | 4528  | coding    | PF04146 |
| MSTRG. 8742. 8  | 3534  | coding    | PF04146 |
| MSTRG. 8742. 9  | 3480  | coding    | PF04146 |
| MSTRG. 8764. 1  | 1789  | noncoding | —       |
| MSTRG. 8765. 1  | 5157  | coding    | PF15097 |
| MSTRG. 8765. 2  | 17517 | coding    | PF15097 |

|                 |       |           |         |
|-----------------|-------|-----------|---------|
| MSTRG. 8766. 1  | 6057  | coding    | PF15362 |
| MSTRG. 8765. 4  | 1299  | noncoding | –       |
| MSTRG. 8748. 4  | 3499  | coding    | PF02759 |
| MSTRG. 8748. 6  | 5390  | coding    | PF02759 |
| MSTRG. 8768. 3  | 2314  | noncoding | –       |
| MSTRG. 8769. 1  | 6751  | coding    | PF03637 |
| MSTRG. 8785. 1  | 2739  | noncoding | –       |
| MSTRG. 8785. 2  | 2575  | noncoding | –       |
| MSTRG. 8785. 3  | 2210  | noncoding | –       |
| MSTRG. 8786. 7  | 9533  | coding    | PF12796 |
| MSTRG. 8786. 13 | 11629 | coding    | PF12796 |
| MSTRG. 8786. 8  | 13769 | coding    | PF12796 |
| MSTRG. 8786. 12 | 7937  | coding    | PF12796 |
| MSTRG. 8786. 10 | 9110  | coding    | PF12796 |
| MSTRG. 8786. 11 | 9067  | coding    | PF12796 |
| MSTRG. 8786. 9  | 8765  | coding    | PF12796 |
| MSTRG. 8786. 15 | 6405  | noncoding | –       |
| MSTRG. 8787. 1  | 11769 | noncoding | –       |
| MSTRG. 8789. 1  | 1276  | noncoding | –       |
| MSTRG. 8803. 1  | 3921  | coding    | PF05485 |
| MSTRG. 8808. 2  | 6778  | coding    | PF00069 |
| MSTRG. 8809. 1  | 1730  | coding    | PF02136 |
| MSTRG. 8809. 4  | 3609  | coding    | PF02136 |
| MSTRG. 8818. 3  | 1669  | coding    | PF01129 |
| MSTRG. 8815. 1  | 494   | noncoding | –       |
| MSTRG. 8815. 2  | 679   | noncoding | –       |
| MSTRG. 8815. 3  | 694   | noncoding | –       |
| MSTRG. 8815. 4  | 418   | noncoding | –       |
| MSTRG. 8825. 6  | 3552  | coding    | PF15921 |
| MSTRG. 8825. 7  | 3256  | coding    | PF15921 |
| MSTRG. 8825. 8  | 2210  | coding    | PF15921 |
| MSTRG. 8826. 4  | 5986  | coding    | PF08687 |
| MSTRG. 8823. 1  | 1111  | noncoding | –       |
| MSTRG. 8833. 1  | 1772  | coding    | PF00134 |
| MSTRG. 8833. 2  | 2463  | coding    | PF00134 |
| MSTRG. 8833. 3  | 2047  | coding    | PF00134 |
| MSTRG. 8833. 4  | 2389  | coding    | PF00134 |
| MSTRG. 8833. 5  | 3484  | coding    | PF00134 |
| MSTRG. 8833. 6  | 4438  | coding    | PF00134 |
| MSTRG. 8833. 7  | 4886  | coding    | PF00134 |
| MSTRG. 8833. 8  | 4451  | coding    | PF00134 |
| MSTRG. 8830. 1  | 541   | coding    | PF03939 |
| MSTRG. 8835. 1  | 2581  | noncoding | –       |
| MSTRG. 8836. 1  | 2358  | noncoding | –       |
| MSTRG. 8838. 1  | 2220  | coding    | PF00078 |
| MSTRG. 8839. 1  | 1116  | noncoding | –       |
| MSTRG. 8842. 1  | 1350  | coding    | PF16184 |
| MSTRG. 8846. 3  | 4404  | coding    | PF15282 |
| MSTRG. 8846. 4  | 4204  | coding    | PF15282 |
| MSTRG. 8846. 5  | 7556  | coding    | PF15282 |
| MSTRG. 8846. 6  | 7445  | coding    | PF15282 |
| MSTRG. 8849. 1  | 602   | noncoding | –       |
| MSTRG. 8844. 1  | 960   | noncoding | –       |
| MSTRG. 8844. 2  | 1384  | noncoding | –       |

|                 |       |           |         |
|-----------------|-------|-----------|---------|
| MSTRG. 8853. 1  | 491   | noncoding | -       |
| MSTRG. 8853. 2  | 422   | noncoding | -       |
| MSTRG. 8853. 3  | 660   | noncoding | -       |
| MSTRG. 8853. 4  | 420   | noncoding | -       |
| MSTRG. 8857. 1  | 207   | noncoding | -       |
| MSTRG. 8862. 1  | 1214  | coding    | PF14713 |
| MSTRG. 8862. 2  | 2083  | noncoding | -       |
| MSTRG. 8863. 1  | 19986 | noncoding | -       |
| MSTRG. 8864. 1  | 2975  | coding    | PF00078 |
| MSTRG. 8865. 1  | 2992  | noncoding | -       |
| MSTRG. 8881. 2  | 1297  | coding    | PF00957 |
| MSTRG. 8888. 1  | 12999 | noncoding | -       |
| MSTRG. 8893. 1  | 4407  | noncoding | -       |
| MSTRG. 8894. 1  | 31076 | coding    | PF00078 |
| MSTRG. 8898. 11 | 4591  | noncoding | -       |
| MSTRG. 8898. 12 | 4108  | noncoding | -       |
| MSTRG. 8898. 13 | 4535  | noncoding | -       |
| MSTRG. 8902. 1  | 5031  | coding    | PF03638 |
| MSTRG. 8896. 1  | 981   | noncoding | -       |
| MSTRG. 8912. 1  | 4510  | noncoding | -       |
| MSTRG. 8912. 2  | 2039  | noncoding | -       |
| MSTRG. 8913. 1  | 674   | coding    | PF01084 |
| MSTRG. 8913. 2  | 773   | coding    | PF01084 |
| MSTRG. 8914. 1  | 2223  | noncoding | -       |
| MSTRG. 8914. 2  | 1643  | noncoding | -       |
| MSTRG. 8908. 1  | 2673  | noncoding | -       |
| MSTRG. 8916. 1  | 538   | noncoding | -       |
| MSTRG. 8919. 5  | 14067 | coding    | PF02138 |
| MSTRG. 8919. 3  | 14499 | coding    | PF02138 |
| MSTRG. 8919. 1  | 14812 | coding    | PF02138 |
| MSTRG. 8919. 2  | 14750 | coding    | PF02138 |
| MSTRG. 8919. 6  | 14795 | coding    | PF02138 |
| MSTRG. 8919. 7  | 14022 | coding    | PF02138 |
| MSTRG. 8919. 8  | 14162 | coding    | PF02138 |
| MSTRG. 8919. 9  | 14110 | coding    | PF02138 |
| MSTRG. 8920. 1  | 458   | noncoding | -       |
| MSTRG. 8920. 2  | 467   | noncoding | -       |
| MSTRG. 8918. 2  | 2660  | coding    | PF00620 |
| MSTRG. 8932. 2  | 2445  | coding    | PF00069 |
| MSTRG. 8941. 1  | 13154 | noncoding | -       |
| MSTRG. 8943. 1  | 10198 | coding    | PF16599 |
| MSTRG. 8943. 2  | 9631  | coding    | PF16599 |
| MSTRG. 8943. 3  | 5991  | coding    | PF16599 |
| MSTRG. 8943. 4  | 5448  | coding    | PF16599 |
| MSTRG. 8943. 5  | 5997  | coding    | PF16599 |
| MSTRG. 8943. 6  | 3830  | noncoding | -       |
| MSTRG. 8943. 7  | 8069  | coding    | PF16599 |
| MSTRG. 8943. 8  | 6863  | coding    | PF16599 |
| MSTRG. 8943. 9  | 6392  | coding    | PF16599 |
| MSTRG. 8943. 10 | 6301  | coding    | PF16599 |
| MSTRG. 8943. 11 | 6404  | coding    | PF16599 |
| MSTRG. 8943. 12 | 6635  | coding    | PF16599 |
| MSTRG. 8943. 13 | 5607  | coding    | PF16599 |
| MSTRG. 8923. 1  | 2703  | coding    | PF15022 |

|                 |       |           |         |
|-----------------|-------|-----------|---------|
| MSTRG. 8923. 4  | 1192  | coding    | PF01758 |
| MSTRG. 8923. 3  | 1633  | coding    | PF15022 |
| MSTRG. 8924. 1  | 759   | noncoding | –       |
| MSTRG. 8928. 5  | 9773  | coding    | PF05110 |
| MSTRG. 8929. 1  | 9545  | noncoding | –       |
| MSTRG. 8949. 1  | 2269  | noncoding | –       |
| MSTRG. 8949. 2  | 520   | noncoding | –       |
| MSTRG. 8951. 2  | 3728  | noncoding | –       |
| MSTRG. 8952. 1  | 315   | noncoding | –       |
| MSTRG. 8954. 1  | 5014  | noncoding | –       |
| MSTRG. 8955. 1  | 822   | noncoding | –       |
| MSTRG. 8957. 1  | 534   | noncoding | –       |
| MSTRG. 8961. 2  | 578   | noncoding | –       |
| MSTRG. 8962. 2  | 398   | coding    | PF10496 |
| MSTRG. 8962. 3  | 7436  | coding    | PF10496 |
| MSTRG. 8966. 1  | 1101  | noncoding | –       |
| MSTRG. 8967. 3  | 1483  | noncoding | –       |
| MSTRG. 8971. 2  | 2799  | noncoding | –       |
| MSTRG. 8972. 2  | 6772  | noncoding | –       |
| MSTRG. 8976. 1  | 297   | noncoding | –       |
| MSTRG. 8981. 1  | 410   | noncoding | –       |
| MSTRG. 8994. 1  | 7114  | coding    | PF16367 |
| MSTRG. 8994. 6  | 5355  | coding    | PF16367 |
| MSTRG. 8994. 2  | 6390  | coding    | PF16367 |
| MSTRG. 8994. 4  | 6849  | coding    | PF16367 |
| MSTRG. 8994. 7  | 1314  | noncoding | –       |
| MSTRG. 8995. 1  | 5347  | noncoding | –       |
| MSTRG. 8996. 1  | 696   | noncoding | –       |
| MSTRG. 8996. 2  | 759   | noncoding | –       |
| MSTRG. 8996. 3  | 718   | noncoding | –       |
| MSTRG. 9002. 2  | 3060  | coding    | PF12937 |
| MSTRG. 9000. 2  | 851   | noncoding | –       |
| MSTRG. 9000. 3  | 2867  | noncoding | –       |
| MSTRG. 9000. 4  | 2892  | noncoding | –       |
| MSTRG. 9003. 2  | 4262  | coding    | PF02267 |
| MSTRG. 9010. 1  | 4819  | coding    | PF05478 |
| MSTRG. 9010. 2  | 5740  | coding    | PF05478 |
| MSTRG. 9010. 3  | 3811  | coding    | PF05478 |
| MSTRG. 9010. 4  | 3588  | coding    | PF05478 |
| MSTRG. 9010. 5  | 3600  | coding    | PF05478 |
| MSTRG. 9010. 6  | 4494  | coding    | PF05478 |
| MSTRG. 9010. 7  | 3418  | coding    | PF05478 |
| MSTRG. 9010. 9  | 6494  | noncoding | –       |
| MSTRG. 9010. 10 | 4923  | noncoding | –       |
| MSTRG. 9010. 11 | 1627  | noncoding | –       |
| MSTRG. 9010. 12 | 1900  | noncoding | –       |
| MSTRG. 9010. 13 | 866   | noncoding | –       |
| MSTRG. 9005. 1  | 395   | noncoding | –       |
| MSTRG. 9008. 1  | 515   | noncoding | –       |
| MSTRG. 9011. 1  | 1085  | noncoding | –       |
| MSTRG. 9025. 1  | 1200  | noncoding | –       |
| MSTRG. 9027. 2  | 1113  | noncoding | –       |
| MSTRG. 9029. 3  | 15751 | noncoding | –       |
| MSTRG. 9029. 4  | 8624  | coding    | PF15376 |



|                 |       |           |         |
|-----------------|-------|-----------|---------|
| MSTRG. 9029. 5  | 7846  | noncoding | –       |
| MSTRG. 9034. 1  | 1477  | noncoding | –       |
| MSTRG. 9034. 2  | 3875  | noncoding | –       |
| MSTRG. 9036. 2  | 1900  | coding    | PF01025 |
| MSTRG. 9036. 3  | 1686  | coding    | PF01025 |
| MSTRG. 9038. 1  | 998   | noncoding | –       |
| MSTRG. 9040. 3  | 7476  | noncoding | –       |
| MSTRG. 9040. 4  | 2702  | noncoding | –       |
| MSTRG. 9041. 1  | 1854  | coding    | PF16182 |
| MSTRG. 9041. 2  | 2137  | coding    | PF16182 |
| MSTRG. 9042. 1  | 757   | noncoding | –       |
| MSTRG. 9042. 2  | 693   | noncoding | –       |
| MSTRG. 9043. 1  | 368   | noncoding | –       |
| MSTRG. 9045. 2  | 887   | coding    | PF01756 |
| MSTRG. 9046. 2  | 1829  | coding    | PF07757 |
| MSTRG. 9050. 1  | 2242  | noncoding | –       |
| MSTRG. 9051. 1  | 2858  | noncoding | –       |
| MSTRG. 9053. 3  | 498   | noncoding | –       |
| MSTRG. 9053. 5  | 495   | noncoding | –       |
| MSTRG. 9053. 6  | 1015  | noncoding | –       |
| MSTRG. 9053. 4  | 4312  | coding    | PF16613 |
| MSTRG. 9053. 7  | 2002  | noncoding | –       |
| MSTRG. 9054. 1  | 1000  | noncoding | –       |
| MSTRG. 9055. 1  | 9922  | noncoding | –       |
| MSTRG. 9055. 4  | 10147 | noncoding | –       |
| MSTRG. 9058. 1  | 4231  | coding    | PF00069 |
| MSTRG. 9058. 2  | 2835  | coding    | PF00069 |
| MSTRG. 9058. 3  | 2966  | noncoding | –       |
| MSTRG. 9058. 4  | 4313  | noncoding | –       |
| MSTRG. 9058. 8  | 5725  | noncoding | –       |
| MSTRG. 9058. 10 | 1774  | noncoding | –       |
| MSTRG. 9058. 11 | 1764  | coding    | PF00069 |
| MSTRG. 9058. 5  | 1427  | noncoding | –       |
| MSTRG. 9058. 6  | 1748  | coding    | PF00069 |
| MSTRG. 9058. 7  | 1327  | coding    | PF00069 |
| MSTRG. 9058. 9  | 1812  | coding    | PF00069 |
| MSTRG. 9058. 12 | 1998  | coding    | PF00069 |
| MSTRG. 9058. 14 | 1876  | coding    | PF00069 |
| MSTRG. 9059. 3  | 768   | coding    | PF04147 |
| MSTRG. 9059. 2  | 2931  | coding    | PF04147 |
| MSTRG. 9062. 6  | 3778  | coding    | PF00596 |
| MSTRG. 9056. 2  | 3908  | noncoding | –       |
| MSTRG. 9081. 6  | 3138  | noncoding | –       |
| MSTRG. 9081. 7  | 5036  | coding    | PF15914 |
| MSTRG. 9081. 5  | 7858  | coding    | PF15914 |
| MSTRG. 9081. 3  | 5084  | coding    | PF15914 |
| MSTRG. 9081. 1  | 4800  | coding    | PF15914 |
| MSTRG. 9081. 4  | 4914  | coding    | PF15914 |
| MSTRG. 9081. 8  | 5954  | coding    | PF15914 |
| MSTRG. 9081. 9  | 4610  | coding    | PF15914 |
| MSTRG. 9081. 10 | 7584  | noncoding | –       |
| MSTRG. 9081. 11 | 3778  | noncoding | –       |
| MSTRG. 9081. 12 | 6322  | noncoding | –       |
| MSTRG. 9082. 1  | 14778 | coding    | PF00078 |

|                 |       |           |         |
|-----------------|-------|-----------|---------|
| MSTRG. 9082. 2  | 4575  | noncoding | -       |
| MSTRG. 9083. 1  | 1162  | noncoding | -       |
| MSTRG. 9084. 1  | 4332  | noncoding | -       |
| MSTRG. 9083. 10 | 3135  | noncoding | -       |
| MSTRG. 9083. 12 | 3152  | noncoding | -       |
| MSTRG. 9083. 13 | 3155  | noncoding | -       |
| MSTRG. 9083. 15 | 3887  | noncoding | -       |
| MSTRG. 9083. 9  | 3530  | noncoding | -       |
| MSTRG. 9083. 4  | 3902  | noncoding | -       |
| MSTRG. 9083. 8  | 2867  | noncoding | -       |
| MSTRG. 9083. 7  | 3940  | noncoding | -       |
| MSTRG. 9083. 16 | 1128  | noncoding | -       |
| MSTRG. 9085. 2  | 1601  | noncoding | -       |
| MSTRG. 9072. 1  | 873   | noncoding | -       |
| MSTRG. 9075. 2  | 2387  | noncoding | -       |
| MSTRG. 9089. 1  | 753   | coding    | PF15161 |
| MSTRG. 9090. 2  | 1987  | noncoding | -       |
| MSTRG. 9090. 3  | 2501  | noncoding | -       |
| MSTRG. 9091. 4  | 4230  | coding    | PF00856 |
| MSTRG. 9091. 5  | 7831  | coding    | PF00855 |
| MSTRG. 9091. 6  | 6947  | coding    | PF00855 |
| MSTRG. 9091. 8  | 10980 | coding    | PF00078 |
| MSTRG. 9092. 1  | 2954  | noncoding | -       |
| MSTRG. 9093. 4  | 3809  | coding    | PF05010 |
| MSTRG. 9094. 2  | 2217  | coding    | PF10272 |
| MSTRG. 9097. 1  | 3495  | noncoding | -       |
| MSTRG. 9097. 2  | 1076  | coding    | PF15242 |
| MSTRG. 9103. 5  | 10161 | coding    | PF09740 |
| MSTRG. 9103. 2  | 10023 | coding    | PF09740 |
| MSTRG. 9104. 3  | 3751  | coding    | PF10607 |
| MSTRG. 9104. 4  | 2113  | coding    | PF10607 |
| MSTRG. 9104. 5  | 2388  | coding    | PF10607 |
| MSTRG. 9104. 7  | 2604  | coding    | PF10607 |
| MSTRG. 9104. 6  | 2315  | coding    | PF10607 |
| MSTRG. 9104. 8  | 4429  | noncoding | -       |
| MSTRG. 9100. 2  | 659   | noncoding | -       |
| MSTRG. 9107. 8  | 2516  | coding    | PF02826 |
| MSTRG. 9107. 6  | 2901  | coding    | PF02826 |
| MSTRG. 9108. 1  | 610   | noncoding | -       |
| MSTRG. 9111. 1  | 504   | noncoding | -       |
| MSTRG. 9112. 2  | 1325  | noncoding | -       |
| MSTRG. 9113. 1  | 877   | noncoding | -       |
| MSTRG. 9110. 1  | 713   | noncoding | -       |
| MSTRG. 9116. 3  | 3091  | coding    | PF01229 |
| MSTRG. 9125. 6  | 2594  | coding    | PF06736 |
| MSTRG. 9125. 2  | 2621  | coding    | PF06736 |
| MSTRG. 9125. 3  | 2700  | coding    | PF06736 |
| MSTRG. 9125. 4  | 2660  | coding    | PF06736 |
| MSTRG. 9125. 5  | 2804  | coding    | PF06736 |
| MSTRG. 9126. 4  | 7735  | coding    | PF10409 |
| MSTRG. 9127. 1  | 31197 | noncoding | -       |
| MSTRG. 9120. 2  | 1913  | coding    | PF16207 |
| MSTRG. 9120. 3  | 5300  | noncoding | -       |
| MSTRG. 9123. 1  | 1171  | noncoding | -       |

|                 |       |           |         |
|-----------------|-------|-----------|---------|
| MSTRG. 9123. 2  | 1107  | noncoding | –       |
| MSTRG. 9129. 1  | 871   | noncoding | –       |
| MSTRG. 9129. 2  | 853   | noncoding | –       |
| MSTRG. 9128. 1  | 1701  | noncoding | –       |
| MSTRG. 9133. 3  | 2840  | noncoding | –       |
| MSTRG. 9136. 1  | 610   | noncoding | –       |
| MSTRG. 9138. 1  | 3197  | noncoding | –       |
| MSTRG. 9138. 3  | 4835  | noncoding | –       |
| MSTRG. 9139. 1  | 1099  | noncoding | –       |
| MSTRG. 9138. 4  | 2184  | noncoding | –       |
| MSTRG. 9140. 1  | 7114  | noncoding | –       |
| MSTRG. 9140. 3  | 1348  | noncoding | –       |
| MSTRG. 9142. 1  | 393   | noncoding | –       |
| MSTRG. 9145. 3  | 3158  | coding    | PF01380 |
| MSTRG. 9145. 5  | 3007  | coding    | PF01380 |
| MSTRG. 9145. 2  | 3315  | coding    | PF01380 |
| MSTRG. 9145. 4  | 3142  | coding    | PF01380 |
| MSTRG. 9145. 6  | 2552  | coding    | PF01380 |
| MSTRG. 9147. 1  | 3501  | noncoding | –       |
| MSTRG. 9146. 4  | 3094  | coding    | PF00069 |
| MSTRG. 9146. 5  | 4194  | coding    | PF00069 |
| MSTRG. 9144. 3  | 1794  | noncoding | –       |
| MSTRG. 9144. 2  | 3881  | noncoding | –       |
| MSTRG. 9157. 3  | 2116  | coding    | PF16577 |
| MSTRG. 9157. 4  | 2159  | noncoding | –       |
| MSTRG. 9153. 3  | 4248  | coding    | PF00262 |
| MSTRG. 9148. 1  | 3397  | coding    | PF14645 |
| MSTRG. 9150. 1  | 788   | coding    | PF14645 |
| MSTRG. 9150. 2  | 785   | coding    | PF14645 |
| MSTRG. 9175. 2  | 2479  | coding    | PF08080 |
| MSTRG. 9175. 4  | 2324  | coding    | PF08080 |
| MSTRG. 9175. 10 | 1781  | coding    | PF08080 |
| MSTRG. 9175. 9  | 1811  | coding    | PF08080 |
| MSTRG. 9175. 8  | 2033  | coding    | PF08080 |
| MSTRG. 9167. 2  | 4115  | coding    | PF05986 |
| MSTRG. 9168. 1  | 417   | noncoding | –       |
| MSTRG. 9188. 1  | 871   | noncoding | –       |
| MSTRG. 9190. 1  | 1189  | noncoding | –       |
| MSTRG. 9190. 3  | 619   | noncoding | –       |
| MSTRG. 9190. 2  | 440   | noncoding | –       |
| MSTRG. 9194. 1  | 4099  | noncoding | –       |
| MSTRG. 9194. 2  | 2088  | noncoding | –       |
| MSTRG. 9193. 3  | 10040 | coding    | PF13765 |
| MSTRG. 9202. 1  | 3374  | coding    | PF00069 |
| MSTRG. 9203. 1  | 423   | coding    | PF00069 |
| MSTRG. 9205. 1  | 4867  | coding    | PF07679 |
| MSTRG. 9205. 2  | 1315  | coding    | PF07679 |
| MSTRG. 9206. 1  | 2617  | noncoding | –       |
| MSTRG. 9209. 2  | 1956  | noncoding | –       |
| MSTRG. 9209. 3  | 3649  | noncoding | –       |
| MSTRG. 9211. 3  | 780   | coding    | PF09776 |
| MSTRG. 9211. 4  | 1720  | coding    | PF09776 |
| MSTRG. 9217. 2  | 1068  | coding    | PF00089 |
| MSTRG. 9230. 1  | 716   | coding    | PF07562 |

|                 |       |           |         |
|-----------------|-------|-----------|---------|
| MSTRG. 9231. 1  | 4094  | noncoding | —       |
| MSTRG. 9231. 3  | 3571  | noncoding | —       |
| MSTRG. 9233. 1  | 4013  | noncoding | —       |
| MSTRG. 9233. 5  | 3897  | noncoding | —       |
| MSTRG. 9235. 3  | 1753  | coding    | PF03792 |
| MSTRG. 9235. 4  | 2477  | coding    | PF03792 |
| MSTRG. 9239. 6  | 5819  | noncoding | —       |
| MSTRG. 9239. 9  | 2881  | noncoding | —       |
| MSTRG. 9239. 8  | 3497  | noncoding | —       |
| MSTRG. 9240. 1  | 2203  | coding    | PF00193 |
| MSTRG. 9249. 4  | 2584  | noncoding | —       |
| MSTRG. 9249. 5  | 2361  | noncoding | —       |
| MSTRG. 9250. 6  | 3909  | coding    | PF01585 |
| MSTRG. 9250. 7  | 5883  | coding    | PF01585 |
| MSTRG. 9250. 8  | 4003  | coding    | PF01585 |
| MSTRG. 9250. 10 | 3714  | coding    | PF01585 |
| MSTRG. 9250. 9  | 6784  | noncoding | —       |
| MSTRG. 9258. 3  | 2559  | coding    | PF05735 |
| MSTRG. 9258. 5  | 2827  | coding    | PF05735 |
| MSTRG. 9259. 2  | 6857  | coding    | PF12885 |
| MSTRG. 9260. 1  | 646   | noncoding | —       |
| MSTRG. 9260. 2  | 485   | noncoding | —       |
| MSTRG. 9256. 3  | 1365  | coding    | PF12280 |
| MSTRG. 9257. 3  | 748   | coding    | PF14966 |
| MSTRG. 9264. 2  | 522   | coding    | PF00240 |
| MSTRG. 9266. 1  | 2186  | coding    | PF10241 |
| MSTRG. 9266. 2  | 1956  | coding    | PF10241 |
| MSTRG. 9266. 3  | 1550  | coding    | PF10241 |
| MSTRG. 9267. 2  | 1882  | coding    | PF00254 |
| MSTRG. 9267. 3  | 1958  | coding    | PF00254 |
| MSTRG. 9268. 2  | 928   | coding    | PF07303 |
| MSTRG. 9269. 1  | 1562  | noncoding | —       |
| MSTRG. 9298. 1  | 5327  | noncoding | —       |
| MSTRG. 9298. 18 | 11096 | noncoding | —       |
| MSTRG. 9298. 10 | 9865  | noncoding | —       |
| MSTRG. 9298. 17 | 5064  | noncoding | —       |
| MSTRG. 9298. 20 | 7805  | noncoding | —       |
| MSTRG. 9298. 11 | 11530 | noncoding | —       |
| MSTRG. 9298. 12 | 11187 | noncoding | —       |
| MSTRG. 9298. 13 | 4924  | noncoding | —       |
| MSTRG. 9298. 15 | 10278 | noncoding | —       |
| MSTRG. 9298. 16 | 11332 | noncoding | —       |
| MSTRG. 9298. 9  | 5080  | noncoding | —       |
| MSTRG. 9298. 24 | 3985  | noncoding | —       |
| MSTRG. 9298. 26 | 4080  | noncoding | —       |
| MSTRG. 9298. 25 | 3274  | noncoding | —       |
| MSTRG. 9298. 30 | 1130  | noncoding | —       |
| MSTRG. 9298. 31 | 1130  | noncoding | —       |
| MSTRG. 9298. 29 | 5736  | noncoding | —       |
| MSTRG. 9298. 33 | 4903  | noncoding | —       |
| MSTRG. 9298. 34 | 5181  | noncoding | —       |
| MSTRG. 9298. 35 | 2407  | noncoding | —       |
| MSTRG. 9298. 36 | 2377  | noncoding | —       |
| MSTRG. 9278. 2  | 1007  | coding    | PF03227 |

|                 |       |           |         |
|-----------------|-------|-----------|---------|
| MSTRG. 9281. 1  | 927   | noncoding | -       |
| MSTRG. 9283. 2  | 1100  | coding    | PF06244 |
| MSTRG. 9284. 1  | 636   | noncoding | -       |
| MSTRG. 9285. 2  | 804   | coding    | PF01775 |
| MSTRG. 9287. 2  | 811   | noncoding | -       |
| MSTRG. 9290. 1  | 5238  | noncoding | -       |
| MSTRG. 9291. 1  | 7747  | coding    | PF06292 |
| MSTRG. 9291. 3  | 5338  | coding    | PF10540 |
| MSTRG. 9295. 1  | 10724 | coding    | PF01182 |
| MSTRG. 9295. 2  | 10643 | coding    | PF01182 |
| MSTRG. 9295. 4  | 3550  | noncoding | -       |
| MSTRG. 9296. 1  | 1850  | coding    | PF13905 |
| MSTRG. 9303. 2  | 1661  | coding    | PF10172 |
| MSTRG. 9304. 1  | 1715  | noncoding | -       |
| MSTRG. 9305. 2  | 1476  | noncoding | -       |
| MSTRG. 9305. 3  | 866   | noncoding | -       |
| MSTRG. 9304. 3  | 2159  | noncoding | -       |
| MSTRG. 9306. 1  | 957   | noncoding | -       |
| MSTRG. 9306. 2  | 1043  | coding    | PF00105 |
| MSTRG. 9307. 2  | 1626  | coding    | PF00104 |
| MSTRG. 9308. 4  | 1321  | coding    | PF07303 |
| MSTRG. 9312. 11 | 7435  | coding    | PF00063 |
| MSTRG. 9312. 12 | 7456  | coding    | PF00063 |
| MSTRG. 9312. 13 | 7417  | coding    | PF00063 |
| MSTRG. 9312. 14 | 7429  | coding    | PF00063 |
| MSTRG. 9312. 3  | 7387  | coding    | PF00063 |
| MSTRG. 9312. 4  | 7420  | coding    | PF00063 |
| MSTRG. 9312. 9  | 7411  | coding    | PF00063 |
| MSTRG. 9312. 15 | 7605  | coding    | PF00063 |
| MSTRG. 9312. 23 | 3838  | coding    | PF00063 |
| MSTRG. 9312. 24 | 15200 | noncoding | -       |
| MSTRG. 9312. 25 | 836   | noncoding | -       |
| MSTRG. 9310. 2  | 4134  | coding    | PF07678 |
| MSTRG. 9315. 1  | 13155 | noncoding | -       |
| MSTRG. 9316. 1  | 219   | noncoding | -       |
| MSTRG. 9315. 3  | 14832 | noncoding | -       |
| MSTRG. 9321. 3  | 14721 | noncoding | -       |
| MSTRG. 9321. 4  | 19190 | noncoding | -       |
| MSTRG. 9322. 1  | 6551  | noncoding | -       |
| MSTRG. 9325. 2  | 7606  | noncoding | -       |
| MSTRG. 9327. 4  | 3587  | coding    | PF15391 |
| MSTRG. 9335. 3  | 8683  | noncoding | -       |
| MSTRG. 9335. 4  | 8252  | noncoding | -       |
| MSTRG. 9333. 2  | 3018  | coding    | PF00928 |
| MSTRG. 9338. 1  | 1776  | noncoding | -       |
| MSTRG. 9361. 4  | 4447  | noncoding | -       |
| MSTRG. 9361. 6  | 4165  | noncoding | -       |
| MSTRG. 9361. 7  | 4166  | noncoding | -       |
| MSTRG. 9361. 8  | 4975  | noncoding | -       |
| MSTRG. 9361. 9  | 5131  | noncoding | -       |
| MSTRG. 9361. 10 | 4369  | noncoding | -       |
| MSTRG. 9361. 11 | 3862  | noncoding | -       |
| MSTRG. 9361. 13 | 3643  | noncoding | -       |
| MSTRG. 9361. 14 | 3538  | noncoding | -       |

|                 |       |           |         |
|-----------------|-------|-----------|---------|
| MSTRG. 9365. 1  | 525   | noncoding | -       |
| MSTRG. 9364. 12 | 3366  | noncoding | -       |
| MSTRG. 9364. 13 | 3123  | coding    | PF04988 |
| MSTRG. 9367. 2  | 10602 | coding    | PF17035 |
| MSTRG. 9367. 3  | 5963  | coding    | PF17035 |
| MSTRG. 9367. 4  | 5532  | coding    | PF17035 |
| MSTRG. 9367. 6  | 2933  | coding    | PF17035 |
| MSTRG. 9367. 9  | 5709  | coding    | PF17035 |
| MSTRG. 9367. 10 | 7623  | coding    | PF17035 |
| MSTRG. 9368. 1  | 10623 | coding    | PF01359 |
| MSTRG. 9367. 12 | 25987 | coding    | PF17035 |
| MSTRG. 9343. 3  | 528   | noncoding | -       |
| MSTRG. 9349. 1  | 2549  | coding    | PF00517 |
| MSTRG. 9353. 1  | 501   | noncoding | -       |
| MSTRG. 9358. 4  | 2411  | coding    | PF01556 |
| MSTRG. 9358. 1  | 2348  | coding    | PF01556 |
| MSTRG. 9358. 3  | 2563  | coding    | PF01556 |
| MSTRG. 9358. 5  | 2396  | coding    | PF01556 |
| MSTRG. 9358. 6  | 2078  | coding    | PF00226 |
| MSTRG. 9360. 3  | 2413  | coding    | PF00069 |
| MSTRG. 9369. 3  | 3683  | coding    | PF00270 |
| MSTRG. 9369. 4  | 3514  | coding    | PF00270 |
| MSTRG. 9369. 5  | 2075  | coding    | PF00270 |
| MSTRG. 9374. 1  | 5218  | coding    | PF02354 |
| MSTRG. 9374. 2  | 7393  | coding    | PF02191 |
| MSTRG. 9374. 3  | 7914  | coding    | PF02354 |
| MSTRG. 9374. 5  | 5102  | coding    | PF02354 |
| MSTRG. 9374. 4  | 6853  | coding    | PF02191 |
| MSTRG. 9374. 7  | 5107  | coding    | PF02354 |
| MSTRG. 9372. 2  | 5343  | coding    | PF00069 |
| MSTRG. 9372. 3  | 5004  | coding    | PF00069 |
| MSTRG. 9373. 3  | 3708  | coding    | PF11771 |
| MSTRG. 9377. 2  | 1330  | noncoding | -       |
| MSTRG. 9386. 6  | 1242  | coding    | PF04589 |
| MSTRG. 9386. 4  | 4693  | coding    | PF04589 |
| MSTRG. 9379. 1  | 738   | noncoding | -       |
| MSTRG. 9382. 1  | 765   | noncoding | -       |
| MSTRG. 9385. 2  | 1903  | coding    | PF04502 |
| MSTRG. 9385. 3  | 1516  | coding    | PF04502 |
| MSTRG. 9396. 1  | 3847  | coding    | PF00651 |
| MSTRG. 9396. 2  | 3551  | coding    | PF00651 |
| MSTRG. 9396. 3  | 3707  | coding    | PF00651 |
| MSTRG. 9398. 4  | 2456  | coding    | PF02005 |
| MSTRG. 9398. 3  | 2377  | coding    | PF02005 |
| MSTRG. 9394. 1  | 5941  | coding    | PF00859 |
| MSTRG. 9394. 2  | 5654  | coding    | PF00859 |
| MSTRG. 9394. 3  | 5529  | coding    | PF00859 |
| MSTRG. 9394. 4  | 4045  | coding    | PF00859 |
| MSTRG. 9393. 1  | 2154  | noncoding | -       |
| MSTRG. 9405. 6  | 797   | noncoding | -       |
| MSTRG. 9407. 3  | 1387  | coding    | PF01351 |
| MSTRG. 9410. 1  | 2509  | coding    | PF05622 |
| MSTRG. 9420. 2  | 800   | coding    | PF02374 |
| MSTRG. 9422. 1  | 7773  | noncoding | -       |

|                 |       |           |         |
|-----------------|-------|-----------|---------|
| MSTRG. 9422. 4  | 3257  | noncoding | –       |
| MSTRG. 9423. 2  | 1627  | coding    | PF01916 |
| MSTRG. 9423. 3  | 1267  | coding    | PF01916 |
| MSTRG. 9423. 4  | 1247  | coding    | PF01916 |
| MSTRG. 9425. 2  | 1139  | noncoding | –       |
| MSTRG. 9411. 2  | 714   | coding    | PF03669 |
| MSTRG. 9413. 2  | 586   | coding    | PF01352 |
| MSTRG. 9428. 2  | 3386  | coding    | PF01352 |
| MSTRG. 9436. 1  | 20970 | coding    | PF01390 |
| MSTRG. 9436. 2  | 21306 | coding    | PF01390 |
| MSTRG. 9436. 3  | 20731 | coding    | PF01390 |
| MSTRG. 9436. 4  | 20970 | coding    | PF01390 |
| MSTRG. 9436. 5  | 13848 | coding    | PF01390 |
| MSTRG. 9436. 6  | 13954 | coding    | PF01390 |
| MSTRG. 9436. 10 | 9779  | coding    | PF01390 |
| MSTRG. 9436. 11 | 10112 | coding    | PF01390 |
| MSTRG. 9436. 15 | 9922  | coding    | PF01390 |
| MSTRG. 9436. 12 | 18799 | coding    | PF01390 |
| MSTRG. 9436. 13 | 18318 | coding    | PF01390 |
| MSTRG. 9436. 14 | 17545 | coding    | PF01390 |
| MSTRG. 9436. 9  | 18693 | coding    | PF01390 |
| MSTRG. 9436. 16 | 20048 | coding    | PF01390 |
| MSTRG. 9436. 17 | 19571 | coding    | PF01390 |
| MSTRG. 9436. 18 | 20770 | coding    | PF01390 |
| MSTRG. 9436. 19 | 20434 | coding    | PF01390 |
| MSTRG. 9431. 3  | 5175  | coding    | PF01352 |
| MSTRG. 9431. 4  | 4146  | coding    | PF01352 |
| MSTRG. 9445. 1  | 8490  | coding    | PF00078 |
| MSTRG. 9446. 2  | 2297  | noncoding | –       |
| MSTRG. 9446. 3  | 709   | noncoding | –       |
| MSTRG. 9446. 4  | 700   | noncoding | –       |
| MSTRG. 9446. 6  | 601   | noncoding | –       |
| MSTRG. 9449. 1  | 3028  | coding    | PF01352 |
| MSTRG. 9449. 2  | 551   | coding    | PF01352 |
| MSTRG. 9449. 4  | 1612  | coding    | PF01352 |
| MSTRG. 9449. 3  | 2779  | coding    | PF01352 |
| MSTRG. 9449. 5  | 532   | noncoding | –       |
| MSTRG. 9445. 3  | 18147 | coding    | PF02994 |
| MSTRG. 9445. 4  | 2291  | coding    | PF01352 |
| MSTRG. 9445. 6  | 1269  | noncoding | –       |
| MSTRG. 9453. 1  | 759   | noncoding | –       |
| MSTRG. 9453. 2  | 744   | noncoding | –       |
| MSTRG. 9453. 3  | 2119  | noncoding | –       |
| MSTRG. 9434. 2  | 1218  | coding    | PF13616 |
| MSTRG. 9437. 2  | 3489  | noncoding | –       |
| MSTRG. 9441. 1  | 2245  | coding    | PF00147 |
| MSTRG. 9458. 2  | 5502  | coding    | PF12047 |
| MSTRG. 9458. 4  | 6508  | coding    | PF12047 |
| MSTRG. 9457. 1  | 2487  | noncoding | –       |
| MSTRG. 9464. 2  | 586   | noncoding | –       |
| MSTRG. 9464. 1  | 3160  | noncoding | –       |
| MSTRG. 9464. 3  | 3064  | noncoding | –       |
| MSTRG. 9464. 4  | 774   | noncoding | –       |
| MSTRG. 9464. 5  | 1718  | noncoding | –       |

|                 |      |           |         |
|-----------------|------|-----------|---------|
| MSTRG. 9460. 1  | 3357 | noncoding | –       |
| MSTRG. 9471. 5  | 3902 | coding    | PF00233 |
| MSTRG. 9471. 6  | 2525 | coding    | PF00233 |
| MSTRG. 9471. 7  | 2511 | coding    | PF00233 |
| MSTRG. 9471. 8  | 1841 | coding    | PF00233 |
| MSTRG. 9473. 1  | 7883 | coding    | PF00651 |
| MSTRG. 9473. 2  | 3020 | coding    | PF00651 |
| MSTRG. 9473. 3  | 8243 | coding    | PF00651 |
| MSTRG. 9473. 4  | 2542 | coding    | PF00651 |
| MSTRG. 9473. 5  | 2308 | coding    | PF00651 |
| MSTRG. 9468. 2  | 1609 | coding    | PF03416 |
| MSTRG. 9468. 3  | 1674 | coding    | PF03416 |
| MSTRG. 9481. 4  | 3794 | coding    | PF07528 |
| MSTRG. 9481. 11 | 2101 | noncoding | –       |
| MSTRG. 9481. 17 | 3993 | coding    | PF07528 |
| MSTRG. 9481. 14 | 3776 | coding    | PF07528 |
| MSTRG. 9481. 15 | 3629 | coding    | PF07528 |
| MSTRG. 9481. 16 | 3764 | coding    | PF07528 |
| MSTRG. 9481. 9  | 3740 | coding    | PF07528 |
| MSTRG. 9481. 10 | 6445 | coding    | PF07528 |
| MSTRG. 9481. 18 | 6359 | coding    | PF07528 |
| MSTRG. 9481. 7  | 6421 | coding    | PF07528 |
| MSTRG. 9477. 2  | 1342 | noncoding | –       |
| MSTRG. 9478. 4  | 1406 | coding    | PF01702 |
| MSTRG. 9482. 7  | 4155 | coding    | PF01031 |
| MSTRG. 9484. 1  | 749  | noncoding | –       |
| MSTRG. 9486. 2  | 2652 | noncoding | –       |
| MSTRG. 9493. 6  | 6649 | coding    | PF00176 |
| MSTRG. 9493. 7  | 4276 | coding    | PF00176 |
| MSTRG. 9493. 8  | 2271 | coding    | PF00176 |
| MSTRG. 9496. 4  | 6424 | coding    | PF06920 |
| MSTRG. 9498. 2  | 1662 | coding    | PF00071 |
| MSTRG. 9498. 8  | 914  | coding    | PF13664 |
| MSTRG. 9499. 1  | 3160 | noncoding | –       |
| MSTRG. 9499. 2  | 2350 | noncoding | –       |
| MSTRG. 9499. 4  | 2634 | noncoding | –       |
| MSTRG. 9499. 5  | 1511 | noncoding | –       |
| MSTRG. 9500. 1  | 2472 | noncoding | –       |
| MSTRG. 9500. 3  | 2698 | noncoding | –       |
| MSTRG. 9500. 4  | 2739 | noncoding | –       |
| MSTRG. 9503. 1  | 2169 | coding    | PF12999 |
| MSTRG. 9503. 2  | 2204 | coding    | PF12999 |
| MSTRG. 9503. 3  | 2197 | coding    | PF12999 |
| MSTRG. 9503. 4  | 2139 | coding    | PF12999 |
| MSTRG. 9503. 6  | 2219 | coding    | PF12999 |
| MSTRG. 9505. 2  | 2076 | noncoding | –       |
| MSTRG. 9505. 3  | 3292 | noncoding | –       |
| MSTRG. 9505. 4  | 3149 | coding    | PF06239 |
| MSTRG. 9505. 5  | 4086 | coding    | PF06239 |
| MSTRG. 9505. 6  | 1953 | coding    | PF06239 |
| MSTRG. 9509. 1  | 1099 | coding    | PF05129 |
| MSTRG. 9509. 3  | 631  | coding    | PF05129 |
| MSTRG. 9516. 4  | 5786 | coding    | PF00621 |
| MSTRG. 9516. 6  | 2380 | noncoding | –       |



|                |      |           |         |
|----------------|------|-----------|---------|
| MSTRG. 9516. 8 | 1603 | noncoding | -       |
| MSTRG. 9516. 7 | 5061 | coding    | PF00621 |
| MSTRG. 9518. 2 | 4566 | coding    | PF00027 |
| MSTRG. 9518. 3 | 4298 | coding    | PF00027 |
| MSTRG. 9522. 1 | 3639 | coding    | PF08683 |
| MSTRG. 9523. 2 | 440  | coding    | PF09803 |
| MSTRG. 9526. 2 | 2011 | coding    | PF00995 |
| MSTRG. 9532. 1 | 583  | noncoding | -       |
| MSTRG. 9534. 1 | 5014 | coding    | PF00076 |
| MSTRG. 9535. 1 | 6213 | noncoding | -       |
| MSTRG. 9535. 2 | 1584 | noncoding | -       |
| MSTRG. 9535. 3 | 6955 | noncoding | -       |
| MSTRG. 9536. 1 | 5671 | coding    | PF00683 |
| MSTRG. 9543. 1 | 1065 | noncoding | -       |
| MSTRG. 9543. 2 | 865  | noncoding | -       |
| MSTRG. 9550. 1 | 1206 | noncoding | -       |
| MSTRG. 9547. 1 | 3993 | coding    | PF01562 |
| MSTRG. 9554. 1 | 1343 | coding    | PF00076 |
| MSTRG. 9555. 1 | 1054 | coding    | PF00076 |
| MSTRG. 9556. 1 | 1310 | noncoding | -       |
| MSTRG. 9556. 2 | 1628 | coding    | PF16564 |
| MSTRG. 9556. 3 | 1372 | noncoding | -       |
| MSTRG. 9563. 1 | 2165 | noncoding | -       |
| MSTRG. 9563. 2 | 2006 | noncoding | -       |
| MSTRG. 9564. 2 | 2842 | noncoding | -       |
| MSTRG. 9565. 4 | 1795 | coding    | PF06814 |
| MSTRG. 9565. 5 | 1851 | coding    | PF06814 |
| MSTRG. 9566. 2 | 1624 | noncoding | -       |
| MSTRG. 9566. 3 | 1828 | noncoding | -       |
| MSTRG. 9574. 3 | 5756 | coding    | PF00153 |
| MSTRG. 9574. 4 | 3679 | coding    | PF00013 |
| MSTRG. 9574. 5 | 4750 | coding    | PF00013 |
| MSTRG. 9574. 6 | 4273 | coding    | PF00013 |
| MSTRG. 9574. 7 | 3335 | coding    | PF00013 |
| MSTRG. 9576. 1 | 1849 | coding    | PF05793 |
| MSTRG. 9576. 2 | 1816 | coding    | PF05793 |
| MSTRG. 9576. 3 | 1895 | coding    | PF05793 |
| MSTRG. 9567. 2 | 451  | noncoding | -       |
| MSTRG. 9567. 3 | 625  | noncoding | -       |
| MSTRG. 9567. 4 | 656  | noncoding | -       |
| MSTRG. 9568. 2 | 1116 | coding    | PF00574 |
| MSTRG. 9571. 1 | 977  | noncoding | -       |
| MSTRG. 9577. 4 | 1886 | coding    | PF00501 |
| MSTRG. 9586. 3 | 3949 | noncoding | -       |
| MSTRG. 9587. 2 | 2032 | noncoding | -       |
| MSTRG. 9589. 3 | 2184 | coding    | PF01207 |
| MSTRG. 9589. 5 | 1350 | coding    | PF15776 |
| MSTRG. 9590. 2 | 3354 | coding    | PF15020 |
| MSTRG. 9590. 3 | 5967 | coding    | PF15020 |
| MSTRG. 9590. 5 | 1510 | coding    | PF15020 |
| MSTRG. 9590. 7 | 2215 | coding    | PF15020 |
| MSTRG. 9590. 6 | 2346 | coding    | PF15020 |
| MSTRG. 9591. 1 | 2807 | coding    | PF05362 |
| MSTRG. 9591. 3 | 3207 | coding    | PF05362 |

|                 |      |           |         |
|-----------------|------|-----------|---------|
| MSTRG. 9598. 10 | 2505 | noncoding | —       |
| MSTRG. 9598. 3  | 2211 | noncoding | —       |
| MSTRG. 9598. 4  | 1324 | noncoding | —       |
| MSTRG. 9598. 6  | 1287 | noncoding | —       |
| MSTRG. 9598. 7  | 1651 | noncoding | —       |
| MSTRG. 9598. 8  | 1255 | noncoding | —       |
| MSTRG. 9598. 9  | 2921 | noncoding | —       |
| MSTRG. 9599. 1  | 981  | coding    | PF15884 |
| MSTRG. 9599. 3  | 836  | coding    | PF15884 |
| MSTRG. 9599. 4  | 824  | coding    | PF15884 |
| MSTRG. 9600. 12 | 8791 | noncoding | —       |
| MSTRG. 9600. 8  | 2864 | noncoding | —       |
| MSTRG. 9600. 13 | 4505 | noncoding | —       |
| MSTRG. 9600. 7  | 2931 | noncoding | —       |
| MSTRG. 9600. 9  | 2931 | noncoding | —       |
| MSTRG. 9600. 16 | 1980 | noncoding | —       |
| MSTRG. 9602. 2  | 2672 | noncoding | —       |
| MSTRG. 9594. 1  | 1203 | coding    | PF13639 |
| MSTRG. 9594. 2  | 860  | coding    | PF13639 |
| MSTRG. 9594. 3  | 1241 | coding    | PF13639 |
| MSTRG. 9594. 5  | 1623 | coding    | PF13639 |
| MSTRG. 9597. 1  | 5300 | coding    | PF13832 |
| MSTRG. 9597. 2  | 5198 | coding    | PF13832 |
| MSTRG. 9597. 3  | 5782 | coding    | PF13832 |
| MSTRG. 9597. 4  | 5819 | coding    | PF13832 |
| MSTRG. 9604. 3  | 4186 | coding    | PF12148 |
| MSTRG. 9604. 4  | 2587 | coding    | PF12148 |
| MSTRG. 9605. 1  | 454  | noncoding | —       |
| MSTRG. 9605. 2  | 313  | noncoding | —       |
| MSTRG. 9606. 1  | 999  | noncoding | —       |
| MSTRG. 9610. 1  | 581  | noncoding | —       |
| MSTRG. 9610. 2  | 718  | noncoding | —       |
| MSTRG. 9612. 2  | 3155 | coding    | PF05527 |
| MSTRG. 9612. 3  | 2871 | coding    | PF05527 |
| MSTRG. 9613. 1  | 570  | noncoding | —       |
| MSTRG. 9612. 4  | 849  | noncoding | —       |
| MSTRG. 9603. 1  | 640  | noncoding | —       |
| MSTRG. 9617. 3  | 1787 | coding    | PF09409 |
| MSTRG. 9619. 2  | 3845 | coding    | PF15539 |
| MSTRG. 9620. 1  | 958  | noncoding | —       |
| MSTRG. 9620. 2  | 922  | noncoding | —       |
| MSTRG. 9624. 3  | 1492 | coding    | PF04502 |
| MSTRG. 9625. 1  | 2048 | noncoding | —       |
| MSTRG. 9626. 1  | 1764 | coding    | PF02146 |
| MSTRG. 9626. 2  | 1646 | coding    | PF02146 |
| MSTRG. 9630. 2  | 2132 | coding    | PF02891 |
| MSTRG. 9634. 3  | 2339 | noncoding | —       |
| MSTRG. 9634. 4  | 1098 | noncoding | —       |
| MSTRG. 9633. 3  | 1496 | noncoding | —       |
| MSTRG. 9633. 2  | 1785 | noncoding | —       |
| MSTRG. 9638. 1  | 2344 | noncoding | —       |
| MSTRG. 9640. 4  | 3904 | coding    | PF01504 |
| MSTRG. 9649. 4  | 1926 | noncoding | —       |
| MSTRG. 9643. 1  | 1238 | noncoding | —       |

|                 |       |           |         |
|-----------------|-------|-----------|---------|
| MSTRG. 9651. 6  | 17190 | coding    | PF00859 |
| MSTRG. 9650. 1  | 340   | noncoding | –       |
| MSTRG. 9653. 1  | 3385  | coding    | PF00503 |
| MSTRG. 9653. 2  | 5509  | coding    | PF00503 |
| MSTRG. 9655. 3  | 2530  | coding    | PF03920 |
| MSTRG. 9657. 1  | 1283  | coding    | PF01352 |
| MSTRG. 9658. 4  | 4658  | coding    | PF01352 |
| MSTRG. 9661. 1  | 1177  | noncoding | –       |
| MSTRG. 9662. 4  | 2825  | coding    | PF16546 |
| MSTRG. 9663. 3  | 1636  | noncoding | –       |
| MSTRG. 9663. 4  | 1833  | noncoding | –       |
| MSTRG. 9665. 1  | 3453  | coding    | PF00631 |
| MSTRG. 9665. 2  | 3938  | coding    | PF00631 |
| MSTRG. 9665. 3  | 3451  | coding    | PF00631 |
| MSTRG. 9665. 5  | 3403  | coding    | PF00631 |
| MSTRG. 9667. 2  | 4386  | coding    | PF00038 |
| MSTRG. 9667. 3  | 3983  | coding    | PF00038 |
| MSTRG. 9675. 2  | 688   | coding    | PF01423 |
| MSTRG. 9675. 3  | 739   | coding    | PF01423 |
| MSTRG. 9675. 4  | 506   | coding    | PF01423 |
| MSTRG. 9670. 2  | 3778  | coding    | PF07679 |
| MSTRG. 9671. 2  | 1013  | coding    | PF02100 |
| MSTRG. 9676. 2  | 7608  | coding    | PF08123 |
| MSTRG. 9676. 3  | 1782  | coding    | PF08123 |
| MSTRG. 9685. 1  | 1507  | noncoding | –       |
| MSTRG. 9689. 1  | 3011  | coding    | PF03637 |
| MSTRG. 9689. 3  | 2752  | coding    | PF03637 |
| MSTRG. 9696. 2  | 9125  | coding    | PF00225 |
| MSTRG. 9696. 5  | 3139  | coding    | PF00225 |
| MSTRG. 9692. 1  | 3016  | coding    | PF00605 |
| MSTRG. 9693. 2  | 1457  | coding    | PF00605 |
| MSTRG. 9691. 2  | 5984  | noncoding | –       |
| MSTRG. 9706. 1  | 2456  | coding    | PF08336 |
| MSTRG. 9706. 5  | 2229  | coding    | PF08336 |
| MSTRG. 9708. 1  | 1310  | noncoding | –       |
| MSTRG. 9719. 1  | 789   | coding    | PF16121 |
| MSTRG. 9728. 1  | 4329  | noncoding | –       |
| MSTRG. 9740. 1  | 590   | noncoding | –       |
| MSTRG. 9742. 1  | 2788  | coding    | PF00501 |
| MSTRG. 9742. 2  | 2743  | coding    | PF00501 |
| MSTRG. 9742. 3  | 2812  | coding    | PF00501 |
| MSTRG. 9742. 4  | 2745  | coding    | PF00501 |
| MSTRG. 9742. 8  | 3674  | coding    | PF00501 |
| MSTRG. 9742. 9  | 2600  | coding    | PF00501 |
| MSTRG. 9742. 13 | 3947  | coding    | PF00501 |
| MSTRG. 9742. 15 | 8157  | noncoding | –       |
| MSTRG. 9742. 17 | 995   | noncoding | –       |
| MSTRG. 9742. 18 | 1669  | noncoding | –       |
| MSTRG. 9743. 1  | 1285  | noncoding | –       |
| MSTRG. 9743. 2  | 991   | noncoding | –       |
| MSTRG. 9745. 1  | 4452  | coding    | PF14637 |
| MSTRG. 9745. 3  | 7179  | coding    | PF14637 |
| MSTRG. 9745. 6  | 4236  | coding    | PF00617 |
| MSTRG. 9732. 2  | 3354  | noncoding | –       |

|                 |       |           |         |
|-----------------|-------|-----------|---------|
| MSTRG. 9734. 2  | 1724  | noncoding | –       |
| MSTRG. 9734. 5  | 462   | noncoding | –       |
| MSTRG. 9734. 4  | 662   | noncoding | –       |
| MSTRG. 9735. 1  | 541   | coding    | PF01230 |
| MSTRG. 9738. 1  | 3166  | coding    | PF05679 |
| MSTRG. 9747. 1  | 734   | noncoding | –       |
| MSTRG. 9753. 1  | 801   | noncoding | –       |
| MSTRG. 9756. 1  | 240   | noncoding | –       |
| MSTRG. 9760. 1  | 1148  | noncoding | –       |
| MSTRG. 9760. 2  | 950   | noncoding | –       |
| MSTRG. 9760. 3  | 596   | noncoding | –       |
| MSTRG. 9773. 1  | 4335  | coding    | PF00171 |
| MSTRG. 9774. 1  | 3883  | noncoding | –       |
| MSTRG. 9774. 2  | 2871  | noncoding | –       |
| MSTRG. 9774. 4  | 2866  | noncoding | –       |
| MSTRG. 9775. 1  | 4464  | noncoding | –       |
| MSTRG. 9780. 1  | 628   | coding    | PF00078 |
| MSTRG. 9798. 1  | 247   | noncoding | –       |
| MSTRG. 9815. 16 | 1463  | noncoding | –       |
| MSTRG. 9815. 18 | 14104 | noncoding | –       |
| MSTRG. 9815. 19 | 4246  | noncoding | –       |
| MSTRG. 9815. 20 | 12184 | coding    | PF00078 |
| MSTRG. 9815. 21 | 10165 | noncoding | –       |
| MSTRG. 9816. 1  | 291   | noncoding | –       |
| MSTRG. 9815. 22 | 3871  | noncoding | –       |
| MSTRG. 9815. 23 | 9434  | noncoding | –       |
| MSTRG. 9815. 24 | 1198  | noncoding | –       |
| MSTRG. 9815. 25 | 19800 | noncoding | –       |
| MSTRG. 9815. 26 | 4764  | noncoding | –       |
| MSTRG. 9815. 27 | 4613  | noncoding | –       |
| MSTRG. 9817. 1  | 36278 | noncoding | –       |
| MSTRG. 9817. 2  | 537   | noncoding | –       |
| MSTRG. 9811. 1  | 450   | noncoding | –       |
| MSTRG. 9812. 2  | 4186  | coding    | PF00069 |
| MSTRG. 9814. 2  | 4649  | coding    | PF12416 |
| MSTRG. 9827. 1  | 2180  | noncoding | –       |
| MSTRG. 9827. 3  | 648   | noncoding | –       |
| MSTRG. 9849. 1  | 3284  | noncoding | –       |
| MSTRG. 9854. 3  | 11619 | coding    | PF12234 |
| MSTRG. 9858. 2  | 2600  | coding    | PF03942 |
| MSTRG. 9859. 1  | 3894  | noncoding | –       |
| MSTRG. 9859. 2  | 4656  | noncoding | –       |
| MSTRG. 9862. 1  | 2769  | noncoding | –       |
| MSTRG. 9863. 1  | 2198  | noncoding | –       |
| MSTRG. 9878. 1  | 2388  | noncoding | –       |
| MSTRG. 9884. 1  | 1221  | noncoding | –       |
| MSTRG. 9889. 1  | 5289  | noncoding | –       |
| MSTRG. 9889. 2  | 4037  | noncoding | –       |
| MSTRG. 9890. 3  | 1880  | noncoding | –       |
| MSTRG. 9891. 1  | 3892  | coding    | PF13639 |
| MSTRG. 9891. 2  | 3269  | coding    | PF13639 |
| MSTRG. 9891. 3  | 3225  | coding    | PF13639 |
| MSTRG. 9891. 4  | 3289  | coding    | PF13639 |
| MSTRG. 9891. 6  | 3272  | coding    | PF13639 |

|                 |      |           |         |
|-----------------|------|-----------|---------|
| MSTRG. 9891. 7  | 3228 | coding    | PF13639 |
| MSTRG. 9891. 8  | 3199 | coding    | PF13639 |
| MSTRG. 9891. 9  | 3102 | coding    | PF13639 |
| MSTRG. 9891. 10 | 3139 | coding    | PF13639 |
| MSTRG. 9891. 11 | 3165 | coding    | PF13639 |
| MSTRG. 9893. 1  | 468  | noncoding | —       |
| MSTRG. 9894. 1  | 2900 | coding    | PF00028 |
| MSTRG. 9894. 2  | 2943 | coding    | PF00028 |
| MSTRG. 9894. 3  | 2679 | coding    | PF00028 |
| MSTRG. 9898. 1  | 647  | noncoding | —       |
| MSTRG. 9898. 2  | 636  | noncoding | —       |
| MSTRG. 9902. 6  | 2220 | noncoding | —       |
| MSTRG. 9902. 5  | 2375 | noncoding | —       |
| MSTRG. 9902. 9  | 4998 | noncoding | —       |
| MSTRG. 9902. 8  | 1755 | noncoding | —       |
| MSTRG. 9902. 10 | 1686 | noncoding | —       |
| MSTRG. 9902. 11 | 1170 | noncoding | —       |
| MSTRG. 9899. 3  | 2158 | noncoding | —       |
| MSTRG. 9899. 4  | 2061 | noncoding | —       |
| MSTRG. 9899. 5  | 2183 | noncoding | —       |
| MSTRG. 9906. 2  | 9366 | coding    | PF00856 |
| MSTRG. 9913. 2  | 2270 | coding    | PF00412 |
| MSTRG. 9913. 6  | 1594 | noncoding | —       |
| MSTRG. 9915. 2  | 2448 | coding    | PF00270 |
| MSTRG. 9918. 1  | 625  | noncoding | —       |
| MSTRG. 9919. 2  | 1518 | coding    | PF13733 |
| MSTRG. 9919. 3  | 1455 | coding    | PF13733 |
| MSTRG. 9919. 4  | 1962 | coding    | PF13733 |
| MSTRG. 9924. 3  | 1698 | coding    | PF00076 |
| MSTRG. 9929. 1  | 3319 | coding    | PF00069 |
| MSTRG. 9929. 6  | 2320 | coding    | PF00069 |
| MSTRG. 9929. 5  | 2142 | coding    | PF00069 |
| MSTRG. 9934. 3  | 3167 | coding    | PF03071 |
| MSTRG. 9941. 2  | 1894 | coding    | PF13765 |
| MSTRG. 9944. 1  | 4973 | coding    | PF00129 |
| MSTRG. 9944. 2  | 3660 | coding    | PF00129 |
| MSTRG. 9944. 3  | 1937 | coding    | PF00129 |
| MSTRG. 9948. 1  | 2131 | noncoding | —       |
| MSTRG. 9961. 1  | 508  | noncoding | —       |
| MSTRG. 9962. 3  | 3487 | coding    | PF05276 |
| MSTRG. 9962. 4  | 3328 | coding    | PF05276 |
| MSTRG. 9963. 2  | 4092 | noncoding | —       |
| MSTRG. 9960. 1  | 1375 | noncoding | —       |
| MSTRG. 9972. 3  | 2182 | noncoding | —       |
| MSTRG. 9972. 4  | 2972 | noncoding | —       |
| MSTRG. 9974. 1  | 522  | noncoding | —       |
| MSTRG. 9977. 1  | 2871 | noncoding | —       |
| MSTRG. 9977. 2  | 1286 | noncoding | —       |
| MSTRG. 9984. 1  | 5234 | coding    | PF00940 |
| MSTRG. 9984. 2  | 5678 | coding    | PF00940 |
| MSTRG. 9985. 2  | 1242 | coding    | PF13639 |
| MSTRG. 9986. 1  | 1908 | noncoding | —       |
| MSTRG. 9986. 3  | 2022 | noncoding | —       |
| MSTRG. 9987. 3  | 3387 | coding    | PF03285 |

|                  |       |           |         |
|------------------|-------|-----------|---------|
| MSTRG. 9987. 4   | 3425  | coding    | PF03285 |
| MSTRG. 9990. 1   | 333   | noncoding | –       |
| MSTRG. 9993. 2   | 2518  | noncoding | –       |
| MSTRG. 9994. 1   | 1185  | coding    | PF00089 |
| MSTRG. 9997. 1   | 1721  | noncoding | –       |
| MSTRG. 9997. 2   | 1502  | noncoding | –       |
| MSTRG. 9997. 3   | 2915  | coding    | PF01388 |
| MSTRG. 9997. 4   | 3169  | coding    | PF01388 |
| MSTRG. 9997. 5   | 1352  | coding    | PF01388 |
| MSTRG. 10000. 1  | 1154  | coding    | PF00060 |
| MSTRG. 10001. 1  | 2520  | coding    | PF09746 |
| MSTRG. 10001. 4  | 1968  | coding    | PF09746 |
| MSTRG. 10002. 1  | 3107  | coding    | PF00307 |
| MSTRG. 10005. 2  | 3161  | coding    | PF03871 |
| MSTRG. 10005. 1  | 2905  | coding    | PF03871 |
| MSTRG. 10008. 4  | 8009  | coding    | PF13872 |
| MSTRG. 10009. 2  | 4950  | coding    | PF00069 |
| MSTRG. 10011. 1  | 949   | coding    | PF02823 |
| MSTRG. 10012. 2  | 3207  | noncoding | –       |
| MSTRG. 10012. 3  | 3717  | noncoding | –       |
| MSTRG. 10012. 4  | 3313  | noncoding | –       |
| MSTRG. 10013. 1  | 694   | noncoding | –       |
| MSTRG. 10014. 1  | 2227  | coding    | PF00076 |
| MSTRG. 10014. 3  | 2614  | coding    | PF00076 |
| MSTRG. 10016. 1  | 2112  | coding    | PF00812 |
| MSTRG. 10020. 4  | 1327  | coding    | PF00076 |
| MSTRG. 10026. 10 | 2456  | coding    | PF01483 |
| MSTRG. 10026. 13 | 1627  | coding    | PF01483 |
| MSTRG. 10026. 11 | 1966  | coding    | PF01483 |
| MSTRG. 10026. 12 | 1969  | coding    | PF01483 |
| MSTRG. 10026. 18 | 1979  | coding    | PF01483 |
| MSTRG. 10024. 2  | 3349  | coding    | PF05986 |
| MSTRG. 10024. 3  | 3295  | coding    | PF05986 |
| MSTRG. 10025. 1  | 531   | noncoding | –       |
| MSTRG. 10031. 1  | 1170  | noncoding | –       |
| MSTRG. 10041. 2  | 4753  | coding    | PF16212 |
| MSTRG. 10041. 3  | 4683  | coding    | PF16212 |
| MSTRG. 10041. 7  | 4586  | coding    | PF16212 |
| MSTRG. 10042. 1  | 1600  | noncoding | –       |
| MSTRG. 10043. 2  | 4476  | coding    | PF15870 |
| MSTRG. 10043. 5  | 4269  | coding    | PF15870 |
| MSTRG. 10043. 6  | 4213  | coding    | PF15870 |
| MSTRG. 10045. 2  | 2657  | noncoding | –       |
| MSTRG. 10037. 3  | 2345  | coding    | PF00069 |
| MSTRG. 10038. 1  | 4682  | noncoding | –       |
| MSTRG. 10038. 2  | 1904  | noncoding | –       |
| MSTRG. 10049. 1  | 2978  | coding    | PF00019 |
| MSTRG. 10050. 2  | 703   | coding    | PF02939 |
| MSTRG. 10052. 2  | 10686 | coding    | PF05110 |
| MSTRG. 10053. 1  | 1559  | noncoding | –       |
| MSTRG. 10051. 2  | 637   | noncoding | –       |
| MSTRG. 10058. 1  | 3609  | noncoding | –       |
| MSTRG. 10060. 1  | 4786  | noncoding | –       |
| MSTRG. 10078. 4  | 3578  | coding    | PF00069 |

|                |       |           |         |
|----------------|-------|-----------|---------|
| MSTRG.10078.5  | 3702  | coding    | PF00069 |
| MSTRG.10078.3  | 4343  | coding    | PF00069 |
| MSTRG.10079.1  | 8499  | coding    | PF00179 |
| MSTRG.10079.2  | 723   | coding    | PF00179 |
| MSTRG.10079.3  | 820   | coding    | PF00179 |
| MSTRG.10082.2  | 3852  | coding    | PF00025 |
| MSTRG.10087.3  | 2359  | coding    | PF00270 |
| MSTRG.10091.1  | 1709  | noncoding | —       |
| MSTRG.10091.2  | 1663  | noncoding | —       |
| MSTRG.10091.3  | 1067  | noncoding | —       |
| MSTRG.10092.1  | 1187  | noncoding | —       |
| MSTRG.10094.8  | 1816  | coding    | PF01661 |
| MSTRG.10094.6  | 1895  | coding    | PF01661 |
| MSTRG.10094.7  | 1920  | coding    | PF01661 |
| MSTRG.10094.9  | 1807  | coding    | PF01661 |
| MSTRG.10094.10 | 1869  | coding    | PF01661 |
| MSTRG.10094.11 | 2038  | coding    | PF01661 |
| MSTRG.10100.1  | 964   | noncoding | —       |
| MSTRG.10100.2  | 766   | noncoding | —       |
| MSTRG.10101.1  | 898   | noncoding | —       |
| MSTRG.10101.3  | 909   | noncoding | —       |
| MSTRG.10104.2  | 13849 | noncoding | —       |
| MSTRG.10105.2  | 3218  | noncoding | —       |
| MSTRG.10107.1  | 11339 | coding    | PF02469 |
| MSTRG.10102.2  | 7489  | coding    | PF03166 |
| MSTRG.10103.1  | 1101  | noncoding | —       |
| MSTRG.10121.1  | 7841  | coding    | PF00651 |
| MSTRG.10121.3  | 7955  | coding    | PF00651 |
| MSTRG.10121.4  | 3190  | noncoding | —       |
| MSTRG.10122.1  | 4192  | coding    | PF07679 |
| MSTRG.10122.2  | 3985  | coding    | PF07679 |
| MSTRG.10122.3  | 3703  | coding    | PF07679 |
| MSTRG.10122.4  | 3797  | coding    | PF07679 |
| MSTRG.10123.1  | 8867  | noncoding | —       |
| MSTRG.10122.5  | 2586  | coding    | PF07679 |
| MSTRG.10122.6  | 2417  | coding    | PF07679 |
| MSTRG.10122.7  | 2426  | coding    | PF07679 |
| MSTRG.10122.8  | 2256  | coding    | PF07679 |
| MSTRG.10133.9  | 3905  | noncoding | —       |
| MSTRG.10133.3  | 4689  | coding    | PF00620 |
| MSTRG.10133.6  | 9938  | coding    | PF00620 |
| MSTRG.10133.5  | 11159 | coding    | PF00620 |
| MSTRG.10133.11 | 3436  | coding    | PF00620 |
| MSTRG.10133.12 | 9585  | coding    | PF00620 |
| MSTRG.10112.2  | 398   | noncoding | —       |
| MSTRG.10112.3  | 4954  | coding    | PF00439 |
| MSTRG.10112.4  | 4541  | coding    | PF00439 |
| MSTRG.10112.5  | 4672  | coding    | PF00439 |
| MSTRG.10112.10 | 3653  | coding    | PF00439 |
| MSTRG.10112.11 | 3578  | coding    | PF00439 |
| MSTRG.10112.12 | 3164  | coding    | PF00439 |
| MSTRG.10115.4  | 2425  | noncoding | —       |
| MSTRG.10115.3  | 2690  | noncoding | —       |
| MSTRG.10115.5  | 1224  | noncoding | —       |

|                |       |           |         |
|----------------|-------|-----------|---------|
| MSTRG.10116.2  | 4722  | coding    | PF15242 |
| MSTRG.10134.1  | 1505  | noncoding | —       |
| MSTRG.10138.3  | 313   | noncoding | —       |
| MSTRG.10138.2  | 3591  | coding    | PF01044 |
| MSTRG.10139.1  | 5083  | noncoding | —       |
| MSTRG.10138.7  | 3161  | coding    | PF01044 |
| MSTRG.10142.1  | 2050  | noncoding | —       |
| MSTRG.10146.6  | 1797  | noncoding | —       |
| MSTRG.10146.5  | 1994  | noncoding | —       |
| MSTRG.10147.1  | 1969  | noncoding | —       |
| MSTRG.10148.1  | 4006  | noncoding | —       |
| MSTRG.10148.2  | 4612  | noncoding | —       |
| MSTRG.10148.3  | 4135  | noncoding | —       |
| MSTRG.10148.7  | 3928  | noncoding | —       |
| MSTRG.10148.9  | 4180  | noncoding | —       |
| MSTRG.10148.8  | 4967  | noncoding | —       |
| MSTRG.10148.6  | 10450 | noncoding | —       |
| MSTRG.10148.4  | 7953  | noncoding | —       |
| MSTRG.10143.2  | 760   | coding    | PF15175 |
| MSTRG.10143.3  | 979   | coding    | PF15175 |
| MSTRG.10155.1  | 611   | noncoding | —       |
| MSTRG.10159.1  | 5098  | coding    | PF01369 |
| MSTRG.10160.1  | 3172  | coding    | PF02158 |
| MSTRG.10162.1  | 744   | noncoding | —       |
| MSTRG.10172.2  | 749   | noncoding | —       |
| MSTRG.10172.5  | 5665  | coding    | PF04845 |
| MSTRG.10172.6  | 863   | noncoding | —       |
| MSTRG.10173.1  | 2906  | noncoding | —       |
| MSTRG.10173.2  | 2083  | noncoding | —       |
| MSTRG.10172.8  | 697   | noncoding | —       |
| MSTRG.10172.9  | 1127  | noncoding | —       |
| MSTRG.10172.10 | 580   | noncoding | —       |
| MSTRG.10172.11 | 870   | noncoding | —       |
| MSTRG.10175.1  | 4985  | noncoding | —       |
| MSTRG.10175.2  | 11334 | noncoding | —       |
| MSTRG.10175.3  | 1882  | noncoding | —       |
| MSTRG.10175.4  | 728   | noncoding | —       |
| MSTRG.10175.5  | 1089  | noncoding | —       |
| MSTRG.10178.6  | 7482  | coding    | PF12796 |
| MSTRG.10178.15 | 8245  | coding    | PF12796 |
| MSTRG.10178.7  | 8267  | coding    | PF12796 |
| MSTRG.10178.8  | 7628  | coding    | PF12796 |
| MSTRG.10178.12 | 8197  | coding    | PF12796 |
| MSTRG.10178.11 | 8851  | coding    | PF12796 |
| MSTRG.10178.9  | 8725  | coding    | PF12796 |
| MSTRG.10178.13 | 9402  | coding    | PF12796 |
| MSTRG.10178.1  | 9485  | coding    | PF12796 |
| MSTRG.10178.14 | 9397  | coding    | PF12796 |
| MSTRG.10178.16 | 13864 | coding    | PF12796 |
| MSTRG.10178.3  | 13972 | coding    | PF12796 |
| MSTRG.10178.10 | 12117 | coding    | PF07304 |
| MSTRG.10178.5  | 13917 | coding    | PF12796 |
| MSTRG.10178.17 | 9564  | coding    | PF12796 |
| MSTRG.10178.18 | 9510  | coding    | PF12796 |



|                  |       |           |         |
|------------------|-------|-----------|---------|
| MSTRG. 10178. 19 | 7125  | coding    | PF12796 |
| MSTRG. 10178. 20 | 7251  | coding    | PF12796 |
| MSTRG. 10178. 21 | 12830 | coding    | PF12796 |
| MSTRG. 10178. 22 | 7529  | coding    | PF12796 |
| MSTRG. 10178. 24 | 7285  | coding    | PF12796 |
| MSTRG. 10178. 23 | 7285  | coding    | PF12796 |
| MSTRG. 10180. 2  | 3679  | coding    | PF07304 |
| MSTRG. 10164. 2  | 1923  | noncoding | —       |
| MSTRG. 10164. 1  | 2507  | noncoding | —       |
| MSTRG. 10164. 3  | 1934  | noncoding | —       |
| MSTRG. 10183. 4  | 3320  | noncoding | —       |
| MSTRG. 10184. 1  | 3567  | noncoding | —       |
| MSTRG. 10185. 1  | 684   | noncoding | —       |
| MSTRG. 10195. 1  | 1377  | coding    | PF08266 |
| MSTRG. 10198. 1  | 3340  | coding    | PF08266 |
| MSTRG. 10197. 5  | 1081  | coding    | PF00028 |
| MSTRG. 10197. 6  | 2360  | coding    | PF08266 |
| MSTRG. 10208. 1  | 13561 | noncoding | —       |
| MSTRG. 10209. 1  | 1210  | noncoding | —       |
| MSTRG. 10197. 7  | 4428  | coding    | PF08266 |
| MSTRG. 10197. 8  | 798   | coding    | PF08266 |
| MSTRG. 10197. 9  | 1596  | coding    | PF00028 |
| MSTRG. 10213. 1  | 4194  | coding    | PF08266 |
| MSTRG. 10214. 1  | 1122  | coding    | PF08266 |
| MSTRG. 10215. 1  | 957   | noncoding | —       |
| MSTRG. 10230. 1  | 3238  | noncoding | —       |
| MSTRG. 10231. 1  | 8229  | coding    | PF08266 |
| MSTRG. 10231. 2  | 4702  | coding    | PF08266 |
| MSTRG. 10232. 1  | 249   | coding    | PF16492 |
| MSTRG. 10234. 1  | 2035  | coding    | PF08266 |
| MSTRG. 10234. 2  | 2167  | coding    | PF00028 |
| MSTRG. 10231. 4  | 5186  | coding    | PF08266 |
| MSTRG. 10234. 3  | 1025  | coding    | PF08266 |
| MSTRG. 10235. 1  | 2146  | coding    | PF08266 |
| MSTRG. 10231. 9  | 4716  | coding    | PF08266 |
| MSTRG. 10236. 1  | 4768  | coding    | PF08266 |
| MSTRG. 10231. 12 | 4929  | coding    | PF08266 |
| MSTRG. 10231. 16 | 7459  | coding    | PF08266 |
| MSTRG. 10231. 15 | 9437  | coding    | PF08266 |
| MSTRG. 10231. 18 | 5983  | coding    | PF08266 |
| MSTRG. 10231. 19 | 4326  | coding    | PF00028 |
| MSTRG. 10237. 1  | 4934  | noncoding | —       |
| MSTRG. 10238. 1  | 5164  | noncoding | —       |
| MSTRG. 10239. 3  | 5492  | coding    | PF02181 |
| MSTRG. 10239. 4  | 5648  | coding    | PF02181 |
| MSTRG. 10222. 1  | 6273  | noncoding | —       |
| MSTRG. 10219. 1  | 262   | noncoding | —       |
| MSTRG. 10219. 2  | 374   | noncoding | —       |
| MSTRG. 10219. 3  | 318   | noncoding | —       |
| MSTRG. 10243. 7  | 6884  | coding    | PF01485 |
| MSTRG. 10243. 8  | 8910  | coding    | PF01485 |
| MSTRG. 10255. 1  | 463   | noncoding | —       |
| MSTRG. 10256. 3  | 5088  | coding    | PF16746 |
| MSTRG. 10259. 1  | 10772 | noncoding | —       |

|               |       |           |         |
|---------------|-------|-----------|---------|
| MSTRG.10260.1 | 8119  | noncoding | -       |
| MSTRG.10261.1 | 2742  | noncoding | -       |
| MSTRG.10266.2 | 2974  | coding    | PF02155 |
| MSTRG.10268.1 | 548   | noncoding | -       |
| MSTRG.10270.1 | 276   | noncoding | -       |
| MSTRG.10273.2 | 1367  | coding    | PF14604 |
| MSTRG.10273.4 | 1171  | noncoding | -       |
| MSTRG.10273.3 | 1424  | noncoding | -       |
| MSTRG.10273.5 | 1121  | noncoding | -       |
| MSTRG.10275.1 | 997   | noncoding | -       |
| MSTRG.10278.2 | 6314  | noncoding | -       |
| MSTRG.10281.7 | 3241  | coding    | PF01846 |
| MSTRG.10281.9 | 3735  | coding    | PF01846 |
| MSTRG.10281.6 | 4219  | coding    | PF01846 |
| MSTRG.10281.4 | 4245  | coding    | PF01846 |
| MSTRG.10281.5 | 4149  | coding    | PF01846 |
| MSTRG.10281.8 | 4308  | coding    | PF01846 |
| MSTRG.10282.2 | 1528  | noncoding | -       |
| MSTRG.10282.3 | 2432  | noncoding | -       |
| MSTRG.10282.4 | 2023  | noncoding | -       |
| MSTRG.10284.1 | 4977  | noncoding | -       |
| MSTRG.10284.4 | 2080  | noncoding | -       |
| MSTRG.10290.1 | 1204  | coding    | PF00050 |
| MSTRG.10290.2 | 2820  | noncoding | -       |
| MSTRG.10302.4 | 4528  | noncoding | -       |
| MSTRG.10305.1 | 19064 | noncoding | -       |
| MSTRG.10305.2 | 5882  | noncoding | -       |
| MSTRG.10306.1 | 425   | noncoding | -       |
| MSTRG.10319.2 | 7856  | coding    | PF00916 |
| MSTRG.10322.2 | 5525  | coding    | PF03184 |
| MSTRG.10322.1 | 2569  | coding    | PF03184 |
| MSTRG.10317.1 | 415   | noncoding | -       |
| MSTRG.10326.3 | 1518  | coding    | PF08831 |
| MSTRG.10330.3 | 703   | coding    | PF00411 |
| MSTRG.10331.1 | 4667  | coding    | PF12062 |
| MSTRG.10331.2 | 5996  | coding    | PF12062 |
| MSTRG.10329.3 | 12507 | noncoding | -       |
| MSTRG.10343.1 | 12577 | noncoding | -       |
| MSTRG.10344.1 | 1371  | noncoding | -       |
| MSTRG.10343.4 | 3966  | noncoding | -       |
| MSTRG.10343.5 | 12695 | noncoding | -       |
| MSTRG.10335.1 | 2554  | noncoding | -       |
| MSTRG.10335.3 | 2382  | noncoding | -       |
| MSTRG.10336.2 | 2464  | coding    | PF00191 |
| MSTRG.10337.1 | 331   | noncoding | -       |
| MSTRG.10341.2 | 2198  | noncoding | -       |
| MSTRG.10341.3 | 1059  | coding    | PF01490 |
| MSTRG.10342.1 | 693   | noncoding | -       |
| MSTRG.10350.1 | 5701  | noncoding | -       |
| MSTRG.10351.1 | 5292  | coding    | PF00028 |
| MSTRG.10351.2 | 5377  | coding    | PF00028 |
| MSTRG.10351.3 | 9775  | coding    | PF00028 |
| MSTRG.10356.3 | 1872  | coding    | PF02136 |
| MSTRG.10356.4 | 1684  | coding    | PF02136 |

|                  |       |           |         |
|------------------|-------|-----------|---------|
| MSTRG. 10362. 2  | 1382  | coding    | PF00060 |
| MSTRG. 10366. 2  | 2236  | coding    | PF05334 |
| MSTRG. 10370. 2  | 1943  | coding    | PF00535 |
| MSTRG. 10370. 3  | 5627  | coding    | PF00652 |
| MSTRG. 10373. 3  | 7640  | coding    | PF05383 |
| MSTRG. 10373. 2  | 8269  | coding    | PF05383 |
| MSTRG. 10373. 5  | 14684 | noncoding | —       |
| MSTRG. 10374. 1  | 2789  | noncoding | —       |
| MSTRG. 10375. 1  | 1156  | coding    | PF00237 |
| MSTRG. 10377. 1  | 249   | noncoding | —       |
| MSTRG. 10379. 1  | 246   | noncoding | —       |
| MSTRG. 10372. 1  | 5914  | noncoding | —       |
| MSTRG. 10372. 2  | 3549  | noncoding | —       |
| MSTRG. 10437. 2  | 5515  | coding    | PF04790 |
| MSTRG. 10437. 3  | 10034 | coding    | PF04790 |
| MSTRG. 10437. 4  | 6047  | noncoding | —       |
| MSTRG. 10437. 5  | 7309  | coding    | PF04790 |
| MSTRG. 10437. 7  | 1281  | noncoding | —       |
| MSTRG. 10437. 6  | 9005  | noncoding | —       |
| MSTRG. 10437. 8  | 21390 | coding    | PF04790 |
| MSTRG. 10437. 9  | 5585  | coding    | PF04790 |
| MSTRG. 10437. 10 | 6216  | noncoding | —       |
| MSTRG. 10437. 11 | 4189  | noncoding | —       |
| MSTRG. 10437. 12 | 52618 | coding    | PF00078 |
| MSTRG. 10437. 13 | 37827 | coding    | PF00078 |
| MSTRG. 10437. 14 | 20955 | coding    | PF04790 |
| MSTRG. 10437. 15 | 12874 | coding    | PF04790 |
| MSTRG. 10437. 16 | 27092 | noncoding | —       |
| MSTRG. 10437. 17 | 9419  | noncoding | —       |
| MSTRG. 10439. 1  | 2606  | noncoding | —       |
| MSTRG. 10437. 18 | 14501 | noncoding | —       |
| MSTRG. 10440. 1  | 4713  | noncoding | —       |
| MSTRG. 10437. 19 | 13019 | noncoding | —       |
| MSTRG. 10437. 20 | 6143  | noncoding | —       |
| MSTRG. 10441. 1  | 9486  | noncoding | —       |
| MSTRG. 10442. 1  | 12586 | noncoding | —       |
| MSTRG. 10443. 1  | 3694  | noncoding | —       |
| MSTRG. 10445. 1  | 1835  | noncoding | —       |
| MSTRG. 10437. 21 | 1153  | coding    | PF04790 |
| MSTRG. 10447. 1  | 2833  | noncoding | —       |
| MSTRG. 10437. 22 | 4884  | noncoding | —       |
| MSTRG. 10381. 1  | 715   | noncoding | —       |
| MSTRG. 10381. 3  | 475   | noncoding | —       |
| MSTRG. 10381. 4  | 532   | noncoding | —       |
| MSTRG. 10381. 5  | 568   | noncoding | —       |
| MSTRG. 10381. 6  | 849   | noncoding | —       |
| MSTRG. 10386. 1  | 824   | noncoding | —       |
| MSTRG. 10391. 1  | 1472  | noncoding | —       |
| MSTRG. 10383. 1  | 2605  | coding    | PF12480 |
| MSTRG. 10392. 1  | 647   | noncoding | —       |
| MSTRG. 10399. 2  | 2509  | noncoding | —       |
| MSTRG. 10399. 3  | 1150  | noncoding | —       |
| MSTRG. 10400. 1  | 3106  | noncoding | —       |
| MSTRG. 10401. 3  | 2189  | coding    | PF14413 |

|                |       |           |         |
|----------------|-------|-----------|---------|
| MSTRG.10410.2  | 642   | noncoding | -       |
| MSTRG.10419.2  | 3306  | coding    | PF16423 |
| MSTRG.10419.3  | 3904  | coding    | PF16423 |
| MSTRG.10419.4  | 4450  | coding    | PF16422 |
| MSTRG.10420.1  | 27797 | noncoding | -       |
| MSTRG.10419.6  | 15468 | coding    | PF16422 |
| MSTRG.10407.1  | 4493  | coding    | PF00078 |
| MSTRG.10407.2  | 1533  | noncoding | -       |
| MSTRG.10407.3  | 1371  | noncoding | -       |
| MSTRG.10409.1  | 2592  | noncoding | -       |
| MSTRG.10470.8  | 1677  | noncoding | -       |
| MSTRG.10470.10 | 1128  | noncoding | -       |
| MSTRG.10470.17 | 12285 | noncoding | -       |
| MSTRG.10470.18 | 1929  | noncoding | -       |
| MSTRG.10470.20 | 7485  | noncoding | -       |
| MSTRG.10470.22 | 10289 | noncoding | -       |
| MSTRG.10470.23 | 24071 | noncoding | -       |
| MSTRG.10470.24 | 13925 | noncoding | -       |
| MSTRG.10421.2  | 1468  | noncoding | -       |
| MSTRG.10424.2  | 430   | noncoding | -       |
| MSTRG.10424.3  | 6930  | noncoding | -       |
| MSTRG.10428.1  | 3964  | noncoding | -       |
| MSTRG.10427.3  | 5177  | noncoding | -       |
| MSTRG.10430.2  | 1188  | coding    | PF00386 |
| MSTRG.10455.1  | 3957  | coding    | PF11708 |
| MSTRG.10455.2  | 3777  | coding    | PF11708 |
| MSTRG.10455.4  | 3217  | coding    | PF11708 |
| MSTRG.10456.1  | 1381  | coding    | PF04856 |
| MSTRG.10456.3  | 739   | coding    | PF04856 |
| MSTRG.10456.5  | 748   | coding    | PF04856 |
| MSTRG.10456.6  | 711   | coding    | PF04856 |
| MSTRG.10456.7  | 1037  | coding    | PF04856 |
| MSTRG.10456.4  | 5899  | coding    | PF04856 |
| MSTRG.10464.1  | 4095  | coding    | PF16212 |
| MSTRG.10466.1  | 447   | noncoding | -       |
| MSTRG.10435.2  | 3127  | coding    | PF02932 |
| MSTRG.10488.3  | 1301  | coding    | PF04321 |
| MSTRG.10488.5  | 2724  | coding    | PF04321 |
| MSTRG.10488.2  | 1396  | coding    | PF04321 |
| MSTRG.10488.4  | 1109  | coding    | PF04321 |
| MSTRG.10489.1  | 891   | noncoding | -       |
| MSTRG.10481.1  | 219   | noncoding | -       |
| MSTRG.10491.1  | 519   | noncoding | -       |
| MSTRG.10507.1  | 9137  | coding    | PF06484 |
| MSTRG.10508.1  | 507   | noncoding | -       |
| MSTRG.10507.3  | 3317  | noncoding | -       |
| MSTRG.10513.4  | 1305  | noncoding | -       |
| MSTRG.10516.1  | 4929  | coding    | PF00186 |
| MSTRG.10511.1  | 1310  | coding    | PF00217 |
| MSTRG.10522.3  | 1488  | coding    | PF04503 |
| MSTRG.10523.1  | 1559  | noncoding | -       |
| MSTRG.10524.1  | 338   | noncoding | -       |
| MSTRG.10525.1  | 1987  | noncoding | -       |
| MSTRG.10526.3  | 1234  | coding    | PF03987 |

|               |       |           |         |
|---------------|-------|-----------|---------|
| MSTRG.10526.5 | 1712  | coding    | PF03987 |
| MSTRG.10539.3 | 4467  | noncoding | —       |
| MSTRG.10539.4 | 5398  | noncoding | —       |
| MSTRG.10542.1 | 1048  | noncoding | —       |
| MSTRG.10542.2 | 7456  | noncoding | —       |
| MSTRG.10543.1 | 443   | noncoding | —       |
| MSTRG.10573.1 | 446   | coding    | PF02935 |
| MSTRG.10577.1 | 239   | noncoding | —       |
| MSTRG.10582.1 | 2107  | noncoding | —       |
| MSTRG.10583.1 | 2200  | noncoding | —       |
| MSTRG.10584.1 | 1810  | noncoding | —       |
| MSTRG.10590.2 | 1011  | coding    | PF10268 |
| MSTRG.10590.3 | 3654  | coding    | PF10268 |
| MSTRG.10595.3 | 3494  | coding    | PF00319 |
| MSTRG.10595.4 | 3802  | coding    | PF00319 |
| MSTRG.10595.5 | 3387  | coding    | PF00319 |
| MSTRG.10595.6 | 3085  | coding    | PF00319 |
| MSTRG.10595.7 | 2579  | coding    | PF00319 |
| MSTRG.10604.1 | 366   | noncoding | —       |
| MSTRG.10633.2 | 4261  | coding    | PF09757 |
| MSTRG.10634.1 | 1088  | noncoding | —       |
| MSTRG.10635.1 | 5796  | noncoding | —       |
| MSTRG.10633.3 | 3597  | noncoding | —       |
| MSTRG.10633.4 | 7406  | coding    | PF09757 |
| MSTRG.10633.5 | 8181  | coding    | PF00078 |
| MSTRG.10636.1 | 497   | noncoding | —       |
| MSTRG.10640.1 | 5382  | noncoding | —       |
| MSTRG.10641.1 | 1206  | noncoding | —       |
| MSTRG.10639.2 | 5691  | coding    | PF14906 |
| MSTRG.10642.2 | 3018  | coding    | PF12796 |
| MSTRG.10643.1 | 817   | noncoding | —       |
| MSTRG.10642.3 | 1376  | noncoding | —       |
| MSTRG.10623.2 | 1270  | noncoding | —       |
| MSTRG.10623.3 | 1160  | noncoding | —       |
| MSTRG.10626.2 | 5246  | noncoding | —       |
| MSTRG.10629.2 | 1110  | coding    | PF15824 |
| MSTRG.10629.3 | 1066  | coding    | PF15824 |
| MSTRG.10646.1 | 776   | noncoding | —       |
| MSTRG.10646.2 | 1393  | coding    | PF01483 |
| MSTRG.10652.1 | 4685  | coding    | PF00748 |
| MSTRG.10653.1 | 734   | noncoding | —       |
| MSTRG.10652.5 | 3269  | noncoding | —       |
| MSTRG.10654.1 | 5179  | coding    | PF01433 |
| MSTRG.10659.1 | 2529  | noncoding | —       |
| MSTRG.10659.2 | 765   | noncoding | —       |
| MSTRG.10665.1 | 4865  | coding    | PF06534 |
| MSTRG.10667.4 | 10819 | coding    | PF00176 |
| MSTRG.10667.5 | 6475  | coding    | PF00176 |
| MSTRG.10668.1 | 5796  | noncoding | —       |
| MSTRG.10668.2 | 5233  | noncoding | —       |
| MSTRG.10680.1 | 838   | noncoding | —       |
| MSTRG.10680.2 | 1042  | noncoding | —       |
| MSTRG.10680.3 | 3472  | noncoding | —       |
| MSTRG.10680.4 | 8626  | noncoding | —       |

|                |       |           |         |
|----------------|-------|-----------|---------|
| MSTRG.10685.1  | 360   | noncoding | -       |
| MSTRG.10688.1  | 2099  | coding    | PF00777 |
| MSTRG.10700.2  | 1595  | coding    | PF03137 |
| MSTRG.10700.3  | 2441  | coding    | PF03137 |
| MSTRG.10700.4  | 2556  | coding    | PF03137 |
| MSTRG.10701.1  | 5105  | noncoding | -       |
| MSTRG.10700.5  | 2996  | noncoding | -       |
| MSTRG.10703.1  | 3996  | coding    | PF03712 |
| MSTRG.10703.13 | 2949  | coding    | PF03712 |
| MSTRG.10713.1  | 3076  | noncoding | -       |
| MSTRG.10713.5  | 2250  | noncoding | -       |
| MSTRG.10713.4  | 2285  | noncoding | -       |
| MSTRG.10713.6  | 2412  | noncoding | -       |
| MSTRG.10715.1  | 1986  | noncoding | -       |
| MSTRG.10707.1  | 1025  | noncoding | -       |
| MSTRG.10712.2  | 4892  | noncoding | -       |
| MSTRG.10718.1  | 1151  | noncoding | -       |
| MSTRG.10725.1  | 6803  | noncoding | -       |
| MSTRG.10725.2  | 4339  | noncoding | -       |
| MSTRG.10761.1  | 1986  | noncoding | -       |
| MSTRG.10764.1  | 422   | noncoding | -       |
| MSTRG.10766.1  | 1627  | coding    | PF00812 |
| MSTRG.10766.2  | 1629  | coding    | PF00812 |
| MSTRG.10767.1  | 215   | noncoding | -       |
| MSTRG.10768.1  | 507   | noncoding | -       |
| MSTRG.10769.1  | 8278  | noncoding | -       |
| MSTRG.10765.1  | 2701  | noncoding | -       |
| MSTRG.10765.2  | 745   | noncoding | -       |
| MSTRG.10772.1  | 1162  | noncoding | -       |
| MSTRG.10775.1  | 1082  | noncoding | -       |
| MSTRG.10776.1  | 2408  | noncoding | -       |
| MSTRG.10776.2  | 5510  | noncoding | -       |
| MSTRG.10777.1  | 2631  | noncoding | -       |
| MSTRG.10774.2  | 2463  | noncoding | -       |
| MSTRG.10778.1  | 2662  | noncoding | -       |
| MSTRG.10774.3  | 2335  | noncoding | -       |
| MSTRG.10774.4  | 3602  | noncoding | -       |
| MSTRG.10774.5  | 2679  | noncoding | -       |
| MSTRG.10779.1  | 6090  | noncoding | -       |
| MSTRG.10774.6  | 8745  | noncoding | -       |
| MSTRG.10780.1  | 1067  | noncoding | -       |
| MSTRG.10782.1  | 808   | noncoding | -       |
| MSTRG.10786.2  | 1494  | noncoding | -       |
| MSTRG.10786.4  | 5126  | coding    | PF07714 |
| MSTRG.10787.1  | 12714 | noncoding | -       |
| MSTRG.10789.1  | 8220  | noncoding | -       |
| MSTRG.10790.1  | 2951  | noncoding | -       |
| MSTRG.10791.1  | 7222  | noncoding | -       |
| MSTRG.10792.1  | 4062  | noncoding | -       |
| MSTRG.10793.3  | 3616  | coding    | PF13639 |
| MSTRG.10793.2  | 5205  | coding    | PF13639 |
| MSTRG.10794.1  | 557   | noncoding | -       |
| MSTRG.10794.2  | 409   | noncoding | -       |
| MSTRG.10795.4  | 8523  | coding    | PF01074 |

|               |       |           |         |
|---------------|-------|-----------|---------|
| MSTRG.10795.5 | 8238  | coding    | PF01074 |
| MSTRG.10796.1 | 333   | noncoding | —       |
| MSTRG.10806.4 | 2300  | coding    | PF15877 |
| MSTRG.10807.1 | 1644  | noncoding | —       |
| MSTRG.10808.2 | 4471  | noncoding | —       |
| MSTRG.10808.5 | 2688  | noncoding | —       |
| MSTRG.10808.6 | 5805  | noncoding | —       |
| MSTRG.10808.7 | 4966  | noncoding | —       |
| MSTRG.10809.1 | 1525  | noncoding | —       |
| MSTRG.10811.1 | 1117  | coding    | PF15216 |
| MSTRG.10812.1 | 298   | noncoding | —       |
| MSTRG.10820.1 | 4387  | coding    | PF00069 |
| MSTRG.10825.1 | 5123  | noncoding | —       |
| MSTRG.10830.1 | 1723  | noncoding | —       |
| MSTRG.10831.1 | 3551  | noncoding | —       |
| MSTRG.10829.4 | 6549  | noncoding | —       |
| MSTRG.10829.5 | 2534  | noncoding | —       |
| MSTRG.10837.1 | 5018  | coding    | PF07679 |
| MSTRG.10837.2 | 4511  | coding    | PF07679 |
| MSTRG.10837.4 | 1716  | coding    | PF07679 |
| MSTRG.10838.1 | 1738  | noncoding | —       |
| MSTRG.10840.2 | 4448  | coding    | PF14604 |
| MSTRG.10840.3 | 7305  | coding    | PF00018 |
| MSTRG.10843.5 | 9464  | coding    | PF01359 |
| MSTRG.10844.2 | 4557  | noncoding | —       |
| MSTRG.10844.1 | 5163  | noncoding | —       |
| MSTRG.10845.1 | 2507  | noncoding | —       |
| MSTRG.10847.1 | 940   | noncoding | —       |
| MSTRG.10848.2 | 2269  | coding    | PF10228 |
| MSTRG.10848.3 | 2386  | coding    | PF10228 |
| MSTRG.10848.4 | 1504  | coding    | PF10228 |
| MSTRG.10851.3 | 6743  | coding    | PF07679 |
| MSTRG.10852.1 | 376   | noncoding | —       |
| MSTRG.10853.1 | 283   | noncoding | —       |
| MSTRG.10857.1 | 213   | noncoding | —       |
| MSTRG.10867.3 | 4574  | coding    | PF00652 |
| MSTRG.10876.7 | 1985  | coding    | PF15007 |
| MSTRG.10876.8 | 2123  | coding    | PF15007 |
| MSTRG.10876.6 | 2259  | coding    | PF15007 |
| MSTRG.10880.3 | 2507  | coding    | PF08516 |
| MSTRG.10882.1 | 1642  | coding    | PF01562 |
| MSTRG.10882.2 | 3206  | coding    | PF08516 |
| MSTRG.10882.4 | 3263  | coding    | PF08516 |
| MSTRG.10882.5 | 2372  | coding    | PF08516 |
| MSTRG.10882.6 | 2432  | coding    | PF08516 |
| MSTRG.10882.7 | 2933  | coding    | PF08516 |
| MSTRG.10882.8 | 823   | noncoding | —       |
| MSTRG.10888.2 | 1943  | noncoding | —       |
| MSTRG.10888.4 | 1709  | coding    | PF00494 |
| MSTRG.10889.1 | 14448 | noncoding | —       |
| MSTRG.10889.2 | 1671  | coding    | PF00320 |
| MSTRG.10890.1 | 769   | noncoding | —       |
| MSTRG.10889.5 | 23935 | noncoding | —       |
| MSTRG.10889.7 | 18926 | coding    | PF05349 |

|               |       |           |         |
|---------------|-------|-----------|---------|
| MSTRG.10889.8 | 7120  | coding    | PF05349 |
| MSTRG.10889.9 | 2982  | coding    | PF05349 |
| MSTRG.10899.1 | 7557  | coding    | PF09815 |
| MSTRG.10901.1 | 13566 | noncoding | —       |
| MSTRG.10902.1 | 5507  | noncoding | —       |
| MSTRG.10903.1 | 16157 | noncoding | —       |
| MSTRG.10896.2 | 980   | coding    | PF00089 |
| MSTRG.10896.3 | 1145  | coding    | PF00089 |
| MSTRG.10906.1 | 498   | noncoding | —       |
| MSTRG.10907.2 | 1056  | coding    | PF00089 |
| MSTRG.10907.3 | 874   | coding    | PF00089 |
| MSTRG.10910.1 | 365   | noncoding | —       |
| MSTRG.10922.3 | 9147  | coding    | PF00225 |
| MSTRG.10922.5 | 9212  | coding    | PF00225 |
| MSTRG.10923.1 | 1318  | noncoding | —       |
| MSTRG.10925.1 | 3910  | coding    | PF04814 |
| MSTRG.10925.9 | 4012  | coding    | PF04814 |
| MSTRG.10928.1 | 4875  | noncoding | —       |
| MSTRG.10913.1 | 473   | noncoding | —       |
| MSTRG.10919.1 | 5118  | coding    | PF15997 |
| MSTRG.10921.1 | 648   | noncoding | —       |
| MSTRG.10935.1 | 3387  | coding    | PF16199 |
| MSTRG.10935.2 | 2877  | coding    | PF16199 |
| MSTRG.10936.2 | 3643  | coding    | PF00530 |
| MSTRG.10941.2 | 3254  | coding    | PF13878 |
| MSTRG.10942.2 | 3952  | noncoding | —       |
| MSTRG.10943.1 | 2856  | noncoding | —       |
| MSTRG.10944.1 | 7261  | noncoding | —       |
| MSTRG.10950.3 | 4509  | noncoding | —       |
| MSTRG.10950.4 | 3502  | noncoding | —       |
| MSTRG.10956.1 | 548   | noncoding | —       |
| MSTRG.10958.1 | 1447  | noncoding | —       |
| MSTRG.10961.1 | 1055  | noncoding | —       |
| MSTRG.10971.1 | 1101  | noncoding | —       |
| MSTRG.10976.1 | 654   | noncoding | —       |
| MSTRG.10976.2 | 680   | noncoding | —       |
| MSTRG.10976.3 | 355   | noncoding | —       |
| MSTRG.10984.1 | 2347  | noncoding | —       |
| MSTRG.10984.3 | 3757  | coding    | PF15176 |
| MSTRG.10990.4 | 26689 | noncoding | —       |
| MSTRG.10990.3 | 18650 | noncoding | —       |
| MSTRG.10990.5 | 7349  | noncoding | —       |
| MSTRG.11012.1 | 4066  | coding    | PF00076 |
| MSTRG.11012.2 | 4046  | coding    | PF00076 |
| MSTRG.11039.1 | 9137  | noncoding | —       |
| MSTRG.11040.1 | 6134  | noncoding | —       |
| MSTRG.11041.1 | 3811  | noncoding | —       |
| MSTRG.11042.1 | 8032  | noncoding | —       |
| MSTRG.11043.1 | 6260  | noncoding | —       |
| MSTRG.11044.1 | 2980  | coding    | PF00143 |
| MSTRG.11045.1 | 1171  | noncoding | —       |
| MSTRG.11046.1 | 384   | noncoding | —       |
| MSTRG.11036.2 | 3769  | coding    | PF00651 |
| MSTRG.11036.1 | 2571  | coding    | PF00651 |



|               |       |           |         |
|---------------|-------|-----------|---------|
| MSTRG.11037.1 | 281   | noncoding | -       |
| MSTRG.11050.1 | 1316  | noncoding | -       |
| MSTRG.11050.2 | 287   | noncoding | -       |
| MSTRG.11055.1 | 495   | coding    | PF03366 |
| MSTRG.11057.1 | 293   | noncoding | -       |
| MSTRG.11060.1 | 1261  | coding    | PF01699 |
| MSTRG.11071.2 | 9194  | coding    | PF02141 |
| MSTRG.11071.3 | 8777  | coding    | PF02141 |
| MSTRG.11071.4 | 8726  | coding    | PF02141 |
| MSTRG.11071.5 | 10014 | noncoding | -       |
| MSTRG.11072.1 | 4933  | noncoding | -       |
| MSTRG.11073.2 | 1631  | noncoding | -       |
| MSTRG.11063.1 | 1590  | coding    | PF03036 |
| MSTRG.11063.3 | 1749  | coding    | PF03036 |
| MSTRG.11076.2 | 3703  | noncoding | -       |
| MSTRG.11100.1 | 12271 | noncoding | -       |
| MSTRG.11101.1 | 3843  | noncoding | -       |
| MSTRG.11090.1 | 1086  | noncoding | -       |
| MSTRG.11091.5 | 3814  | coding    | PF11467 |
| MSTRG.11091.6 | 3849  | coding    | PF11467 |
| MSTRG.11096.2 | 1157  | coding    | PF12251 |
| MSTRG.11098.1 | 9705  | coding    | PF10300 |
| MSTRG.11098.2 | 2122  | coding    | PF10300 |
| MSTRG.11103.2 | 1393  | coding    | PF01529 |
| MSTRG.11103.3 | 1802  | noncoding | -       |
| MSTRG.11109.1 | 207   | noncoding | -       |
| MSTRG.11154.2 | 7557  | coding    | PF00102 |
| MSTRG.11156.1 | 336   | noncoding | -       |
| MSTRG.11158.1 | 4158  | coding    | PF00041 |
| MSTRG.11161.1 | 1191  | coding    | PF15055 |
| MSTRG.11161.4 | 552   | noncoding | -       |
| MSTRG.11170.1 | 2986  | coding    | PF00078 |
| MSTRG.11171.1 | 1597  | noncoding | -       |
| MSTRG.11169.3 | 2178  | coding    | PF02373 |
| MSTRG.11177.1 | 3037  | coding    | PF02347 |
| MSTRG.11163.2 | 2438  | noncoding | -       |
| MSTRG.11185.1 | 8646  | noncoding | -       |
| MSTRG.11186.1 | 2641  | noncoding | -       |
| MSTRG.11188.3 | 5994  | coding    | PF04389 |
| MSTRG.11190.3 | 6759  | coding    | PF07064 |
| MSTRG.11191.1 | 2751  | noncoding | -       |
| MSTRG.11194.2 | 702   | noncoding | -       |
| MSTRG.11199.1 | 2694  | noncoding | -       |
| MSTRG.11194.4 | 736   | noncoding | -       |
| MSTRG.11230.1 | 702   | noncoding | -       |
| MSTRG.11235.1 | 1416  | noncoding | -       |
| MSTRG.11235.2 | 3069  | noncoding | -       |
| MSTRG.11243.1 | 14645 | noncoding | -       |
| MSTRG.11243.3 | 7639  | noncoding | -       |
| MSTRG.11243.6 | 447   | noncoding | -       |
| MSTRG.11243.8 | 2668  | noncoding | -       |
| MSTRG.11219.1 | 1629  | noncoding | -       |
| MSTRG.11226.1 | 3182  | coding    | PF00057 |
| MSTRG.11226.3 | 2683  | coding    | PF00057 |

|                |       |           |         |
|----------------|-------|-----------|---------|
| MSTRG.11221.1  | 697   | noncoding | -       |
| MSTRG.11221.2  | 808   | noncoding | -       |
| MSTRG.11248.3  | 5795  | coding    | PF00176 |
| MSTRG.11248.9  | 5538  | coding    | PF00176 |
| MSTRG.11248.8  | 6030  | coding    | PF00176 |
| MSTRG.11248.6  | 6412  | coding    | PF00176 |
| MSTRG.11248.7  | 5799  | coding    | PF00176 |
| MSTRG.11249.1  | 13478 | noncoding | -       |
| MSTRG.11257.1  | 420   | noncoding | -       |
| MSTRG.11256.1  | 304   | noncoding | -       |
| MSTRG.11279.1  | 649   | noncoding | -       |
| MSTRG.11283.1  | 2564  | coding    | PF02492 |
| MSTRG.11283.2  | 1992  | coding    | PF02492 |
| MSTRG.11284.1  | 1253  | noncoding | -       |
| MSTRG.11292.1  | 3846  | coding    | PF00595 |
| MSTRG.11293.1  | 3027  | noncoding | -       |
| MSTRG.11294.2  | 6249  | coding    | PF00640 |
| MSTRG.11294.3  | 4399  | coding    | PF00595 |
| MSTRG.11294.4  | 5177  | coding    | PF00640 |
| MSTRG.11300.3  | 1925  | noncoding | -       |
| MSTRG.11301.2  | 5142  | noncoding | -       |
| MSTRG.11301.1  | 6384  | noncoding | -       |
| MSTRG.11301.3  | 2428  | noncoding | -       |
| MSTRG.11301.4  | 7062  | noncoding | -       |
| MSTRG.11301.5  | 2483  | noncoding | -       |
| MSTRG.11302.1  | 1094  | noncoding | -       |
| MSTRG.11302.2  | 9992  | coding    | PF02994 |
| MSTRG.11303.1  | 607   | noncoding | -       |
| MSTRG.11304.2  | 1993  | coding    | PF00629 |
| MSTRG.11304.3  | 946   | coding    | PF00629 |
| MSTRG.11373.3  | 3657  | noncoding | -       |
| MSTRG.11373.4  | 6336  | noncoding | -       |
| MSTRG.11373.8  | 1824  | noncoding | -       |
| MSTRG.11377.1  | 12541 | coding    | PF16519 |
| MSTRG.11377.2  | 6866  | coding    | PF16519 |
| MSTRG.11378.1  | 1192  | noncoding | -       |
| MSTRG.11377.3  | 7246  | coding    | PF16519 |
| MSTRG.11377.4  | 7555  | coding    | PF16519 |
| MSTRG.11377.5  | 10212 | coding    | PF16519 |
| MSTRG.11377.7  | 4744  | coding    | PF16519 |
| MSTRG.11377.6  | 5001  | coding    | PF16519 |
| MSTRG.11377.8  | 17452 | noncoding | -       |
| MSTRG.11377.9  | 11104 | noncoding | -       |
| MSTRG.11377.10 | 1120  | noncoding | -       |
| MSTRG.11379.1  | 2736  | noncoding | -       |
| MSTRG.11377.11 | 9210  | noncoding | -       |
| MSTRG.11381.1  | 3044  | noncoding | -       |
| MSTRG.11382.1  | 2594  | noncoding | -       |
| MSTRG.11377.18 | 3619  | noncoding | -       |
| MSTRG.11377.19 | 26685 | coding    | PF02994 |
| MSTRG.11377.20 | 15415 | noncoding | -       |
| MSTRG.11377.21 | 5204  | noncoding | -       |
| MSTRG.11377.22 | 1536  | noncoding | -       |
| MSTRG.11377.23 | 8068  | noncoding | -       |

|                 |       |           |         |
|-----------------|-------|-----------|---------|
| MSTRG. 11377.24 | 34337 | coding    | PF02994 |
| MSTRG. 11377.25 | 25658 | noncoding | —       |
| MSTRG. 11377.26 | 2255  | noncoding | —       |
| MSTRG. 11377.27 | 3447  | noncoding | —       |
| MSTRG. 11309.1  | 2806  | coding    | PF12695 |
| MSTRG. 11307.2  | 1210  | coding    | PF15851 |
| MSTRG. 11313.1  | 2700  | noncoding | —       |
| MSTRG. 11313.2  | 15851 | noncoding | —       |
| MSTRG. 11313.3  | 3975  | noncoding | —       |
| MSTRG. 11313.4  | 4980  | noncoding | —       |
| MSTRG. 11319.1  | 964   | noncoding | —       |
| MSTRG. 11319.2  | 871   | noncoding | —       |
| MSTRG. 11321.1  | 4637  | coding    | PF02816 |
| MSTRG. 11326.1  | 466   | noncoding | —       |
| MSTRG. 11328.2  | 1758  | coding    | PF07942 |
| MSTRG. 11328.4  | 4590  | coding    | PF07942 |
| MSTRG. 11331.1  | 1046  | noncoding | —       |
| MSTRG. 11335.1  | 335   | noncoding | —       |
| MSTRG. 11336.2  | 5582  | coding    | PF16470 |
| MSTRG. 11336.3  | 4344  | coding    | PF01483 |
| MSTRG. 11338.2  | 3267  | coding    | PF01687 |
| MSTRG. 11338.3  | 3980  | coding    | PF01687 |
| MSTRG. 11350.1  | 22679 | coding    | PF16910 |
| MSTRG. 11350.5  | 5554  | coding    | PF16908 |
| MSTRG. 11350.6  | 5728  | coding    | PF16908 |
| MSTRG. 11350.4  | 9411  | coding    | PF16910 |
| MSTRG. 11350.7  | 10148 | coding    | PF16910 |
| MSTRG. 11351.1  | 4643  | noncoding | —       |
| MSTRG. 11352.1  | 1777  | noncoding | —       |
| MSTRG. 11350.8  | 5691  | noncoding | —       |
| MSTRG. 11357.1  | 1754  | noncoding | —       |
| MSTRG. 11358.1  | 5726  | noncoding | —       |
| MSTRG. 11359.1  | 9327  | noncoding | —       |
| MSTRG. 11360.1  | 20756 | noncoding | —       |
| MSTRG. 11360.2  | 4492  | noncoding | —       |
| MSTRG. 11344.2  | 4891  | coding    | PF00503 |
| MSTRG. 11345.1  | 8738  | noncoding | —       |
| MSTRG. 11345.2  | 9873  | noncoding | —       |
| MSTRG. 11346.1  | 661   | noncoding | —       |
| MSTRG. 11347.1  | 17052 | noncoding | —       |
| MSTRG. 11348.3  | 2738  | noncoding | —       |
| MSTRG. 11363.1  | 1839  | noncoding | —       |
| MSTRG. 11365.1  | 3861  | noncoding | —       |
| MSTRG. 11366.1  | 4509  | noncoding | —       |
| MSTRG. 11367.1  | 15468 | noncoding | —       |
| MSTRG. 11367.2  | 14052 | noncoding | —       |
| MSTRG. 11400.1  | 17998 | coding    | PF03920 |
| MSTRG. 11400.2  | 6963  | coding    | PF03920 |
| MSTRG. 11400.3  | 4969  | coding    | PF03920 |
| MSTRG. 11400.4  | 16586 | noncoding | —       |
| MSTRG. 11400.5  | 18993 | coding    | PF03920 |
| MSTRG. 11403.1  | 4479  | coding    | PF14650 |
| MSTRG. 11404.1  | 4604  | coding    | PF14650 |
| MSTRG. 11404.2  | 4765  | coding    | PF14650 |

|                |       |           |         |
|----------------|-------|-----------|---------|
| MSTRG.11408.1  | 6047  | noncoding | -       |
| MSTRG.11410.1  | 1702  | coding    | PF15371 |
| MSTRG.11411.1  | 1278  | noncoding | -       |
| MSTRG.11411.2  | 705   | noncoding | -       |
| MSTRG.11413.3  | 5726  | coding    | PF16744 |
| MSTRG.11413.4  | 6778  | noncoding | -       |
| MSTRG.11406.3  | 2623  | coding    | PF01556 |
| MSTRG.11414.1  | 1865  | noncoding | -       |
| MSTRG.11417.1  | 1780  | noncoding | -       |
| MSTRG.11417.2  | 1994  | noncoding | -       |
| MSTRG.11417.3  | 2681  | noncoding | -       |
| MSTRG.11417.4  | 4220  | noncoding | -       |
| MSTRG.11418.4  | 3516  | noncoding | -       |
| MSTRG.11427.1  | 16481 | coding    | PF10540 |
| MSTRG.11427.3  | 16774 | coding    | PF10540 |
| MSTRG.11427.4  | 16621 | coding    | PF10540 |
| MSTRG.11429.1  | 5799  | coding    | PF16212 |
| MSTRG.11430.1  | 1710  | noncoding | -       |
| MSTRG.11431.2  | 4600  | noncoding | -       |
| MSTRG.11431.3  | 4750  | noncoding | -       |
| MSTRG.11432.1  | 2411  | coding    | PF00069 |
| MSTRG.11433.1  | 695   | noncoding | -       |
| MSTRG.11436.1  | 1896  | noncoding | -       |
| MSTRG.11436.2  | 1807  | noncoding | -       |
| MSTRG.11437.3  | 1308  | coding    | PF00194 |
| MSTRG.11438.1  | 1206  | coding    | PF00261 |
| MSTRG.11439.3  | 8550  | coding    | PF08913 |
| MSTRG.11441.4  | 3068  | coding    | PF04685 |
| MSTRG.11441.2  | 3256  | coding    | PF04685 |
| MSTRG.11441.3  | 3469  | coding    | PF04685 |
| MSTRG.11442.1  | 1666  | coding    | PF04685 |
| MSTRG.11443.4  | 2086  | coding    | PF08737 |
| MSTRG.11443.5  | 2596  | coding    | PF08737 |
| MSTRG.11443.7  | 2050  | coding    | PF08737 |
| MSTRG.11443.8  | 2126  | coding    | PF08737 |
| MSTRG.11443.6  | 2687  | coding    | PF08737 |
| MSTRG.11421.3  | 551   | coding    | PF01230 |
| MSTRG.11423.1  | 1646  | coding    | PF14753 |
| MSTRG.11424.2  | 4732  | coding    | PF12036 |
| MSTRG.11449.2  | 1809  | noncoding | -       |
| MSTRG.11457.1  | 6580  | coding    | PF01086 |
| MSTRG.11457.2  | 4549  | coding    | PF01086 |
| MSTRG.11457.3  | 1020  | coding    | PF01086 |
| MSTRG.11460.1  | 1554  | noncoding | -       |
| MSTRG.11462.12 | 5737  | coding    | PF13639 |
| MSTRG.11462.7  | 4362  | coding    | PF13639 |
| MSTRG.11462.8  | 5154  | coding    | PF13639 |
| MSTRG.11462.9  | 5318  | coding    | PF13639 |
| MSTRG.11462.13 | 4581  | coding    | PF13639 |
| MSTRG.11462.14 | 3499  | coding    | PF13639 |
| MSTRG.11462.15 | 2030  | noncoding | -       |
| MSTRG.11463.1  | 1615  | noncoding | -       |
| MSTRG.11464.1  | 6437  | noncoding | -       |
| MSTRG.11465.1  | 371   | noncoding | -       |

|                  |       |           |         |
|------------------|-------|-----------|---------|
| MSTRG. 11466. 1  | 2676  | coding    | PF00069 |
| MSTRG. 11466. 2  | 5828  | coding    | PF00069 |
| MSTRG. 11472. 1  | 3375  | noncoding | —       |
| MSTRG. 11472. 4  | 1060  | noncoding | —       |
| MSTRG. 11472. 2  | 2744  | noncoding | —       |
| MSTRG. 11472. 5  | 2638  | noncoding | —       |
| MSTRG. 11472. 6  | 6357  | noncoding | —       |
| MSTRG. 11472. 7  | 15536 | noncoding | —       |
| MSTRG. 11472. 8  | 7009  | coding    | PF00078 |
| MSTRG. 11473. 1  | 6908  | noncoding | —       |
| MSTRG. 11473. 2  | 6347  | noncoding | —       |
| MSTRG. 11473. 3  | 5245  | noncoding | —       |
| MSTRG. 11474. 1  | 3861  | noncoding | —       |
| MSTRG. 11473. 4  | 4920  | noncoding | —       |
| MSTRG. 11472. 9  | 821   | noncoding | —       |
| MSTRG. 11472. 10 | 3647  | noncoding | —       |
| MSTRG. 11475. 1  | 1802  | noncoding | —       |
| MSTRG. 11469. 1  | 2258  | coding    | PF02826 |
| MSTRG. 11470. 5  | 3565  | coding    | PF00651 |
| MSTRG. 11476. 3  | 3562  | coding    | PF13229 |
| MSTRG. 11476. 2  | 7352  | coding    | PF15178 |
| MSTRG. 11476. 4  | 3272  | coding    | PF13229 |
| MSTRG. 11476. 5  | 5715  | coding    | PF15178 |
| MSTRG. 11477. 1  | 5048  | noncoding | —       |
| MSTRG. 11478. 1  | 4861  | noncoding | —       |
| MSTRG. 11483. 2  | 1145  | coding    | PF15985 |
| MSTRG. 11489. 1  | 302   | noncoding | —       |
| MSTRG. 11490. 5  | 4847  | coding    | PF14643 |
| MSTRG. 11490. 6  | 5071  | coding    | PF14643 |
| MSTRG. 11496. 2  | 3430  | coding    | PF00567 |
| MSTRG. 11499. 2  | 2860  | coding    | PF12368 |
| MSTRG. 11499. 4  | 1457  | noncoding | —       |
| MSTRG. 11492. 7  | 1617  | noncoding | —       |
| MSTRG. 11492. 6  | 1832  | noncoding | —       |
| MSTRG. 11492. 9  | 1822  | noncoding | —       |
| MSTRG. 11492. 11 | 2299  | noncoding | —       |
| MSTRG. 11492. 12 | 1601  | noncoding | —       |
| MSTRG. 11492. 5  | 1611  | noncoding | —       |
| MSTRG. 11492. 8  | 1733  | noncoding | —       |
| MSTRG. 11492. 10 | 2036  | noncoding | —       |
| MSTRG. 11492. 4  | 1768  | noncoding | —       |
| MSTRG. 11505. 1  | 1767  | coding    | PF14580 |
| MSTRG. 11505. 2  | 2443  | coding    | PF14580 |
| MSTRG. 11507. 1  | 4790  | noncoding | —       |
| MSTRG. 11507. 6  | 5961  | noncoding | —       |
| MSTRG. 11507. 8  | 6725  | noncoding | —       |
| MSTRG. 11507. 3  | 4411  | noncoding | —       |
| MSTRG. 11507. 7  | 5284  | noncoding | —       |
| MSTRG. 11507. 2  | 6363  | noncoding | —       |
| MSTRG. 11507. 4  | 4746  | noncoding | —       |
| MSTRG. 11507. 9  | 6251  | noncoding | —       |
| MSTRG. 11508. 1  | 4806  | coding    | PF08953 |
| MSTRG. 11508. 4  | 5301  | coding    | PF16300 |
| MSTRG. 11508. 5  | 1765  | coding    | PF08953 |

|                |       |           |         |
|----------------|-------|-----------|---------|
| MSTRG.11510.1  | 4684  | noncoding | -       |
| MSTRG.11513.1  | 1766  | noncoding | -       |
| MSTRG.11514.1  | 846   | noncoding | -       |
| MSTRG.11514.2  | 587   | noncoding | -       |
| MSTRG.11515.1  | 701   | coding    | PF12796 |
| MSTRG.11520.1  | 5259  | coding    | PF06482 |
| MSTRG.11534.1  | 3623  | coding    | PF13848 |
| MSTRG.11537.1  | 1196  | noncoding | -       |
| MSTRG.11539.3  | 2639  | coding    | PF12796 |
| MSTRG.11540.4  | 1356  | noncoding | -       |
| MSTRG.11530.2  | 1268  | coding    | PF00089 |
| MSTRG.11551.1  | 5804  | coding    | PF14650 |
| MSTRG.11551.2  | 4985  | coding    | PF14650 |
| MSTRG.11553.1  | 1031  | coding    | PF00089 |
| MSTRG.11549.5  | 890   | noncoding | -       |
| MSTRG.11549.4  | 12379 | noncoding | -       |
| MSTRG.11542.1  | 5586  | coding    | PF14650 |
| MSTRG.11545.1  | 1131  | noncoding | -       |
| MSTRG.11556.2  | 1421  | noncoding | -       |
| MSTRG.11560.1  | 562   | coding    | PF01352 |
| MSTRG.11568.1  | 1973  | noncoding | -       |
| MSTRG.11570.1  | 1108  | noncoding | -       |
| MSTRG.11571.1  | 435   | noncoding | -       |
| MSTRG.11584.1  | 1007  | noncoding | -       |
| MSTRG.11586.1  | 2866  | noncoding | -       |
| MSTRG.11589.2  | 3629  | coding    | PF01400 |
| MSTRG.11590.3  | 1836  | coding    | PF05132 |
| MSTRG.11591.2  | 7480  | coding    | PF02171 |
| MSTRG.11594.3  | 7580  | coding    | PF02208 |
| MSTRG.11595.1  | 666   | noncoding | -       |
| MSTRG.11595.2  | 521   | noncoding | -       |
| MSTRG.11594.4  | 4472  | coding    | PF02208 |
| MSTRG.11606.4  | 3673  | coding    | PF14443 |
| MSTRG.11606.10 | 3882  | coding    | PF14443 |
| MSTRG.11599.1  | 3759  | noncoding | -       |
| MSTRG.11599.2  | 1600  | noncoding | -       |
| MSTRG.11610.1  | 1857  | noncoding | -       |
| MSTRG.11610.2  | 1778  | noncoding | -       |
| MSTRG.11611.2  | 5902  | coding    | PF01150 |
| MSTRG.11611.4  | 5893  | coding    | PF01150 |
| MSTRG.11613.1  | 328   | noncoding | -       |
| MSTRG.11615.1  | 3468  | coding    | PF00153 |
| MSTRG.11616.1  | 484   | noncoding | -       |
| MSTRG.11618.2  | 3304  | coding    | PF00046 |
| MSTRG.11617.1  | 531   | noncoding | -       |
| MSTRG.11622.1  | 4331  | noncoding | -       |
| MSTRG.11622.2  | 1220  | noncoding | -       |
| MSTRG.11636.2  | 2736  | coding    | PF15276 |
| MSTRG.11643.2  | 4763  | noncoding | -       |
| MSTRG.11643.3  | 2083  | noncoding | -       |
| MSTRG.11643.4  | 2247  | noncoding | -       |
| MSTRG.11645.1  | 464   | noncoding | -       |
| MSTRG.11646.1  | 1373  | coding    | PF06553 |
| MSTRG.11649.4  | 4197  | noncoding | -       |

|               |       |           |         |
|---------------|-------|-----------|---------|
| MSTRG.11656.3 | 2709  | coding    | PF07714 |
| MSTRG.11657.2 | 3658  | coding    | PF13419 |
| MSTRG.11662.1 | 901   | noncoding | —       |
| MSTRG.11663.4 | 2574  | coding    | PF04030 |
| MSTRG.11663.3 | 1516  | coding    | PF04030 |
| MSTRG.11664.2 | 745   | noncoding | —       |
| MSTRG.11666.1 | 5596  | coding    | PF11969 |
| MSTRG.11666.5 | 3714  | coding    | PF11969 |
| MSTRG.11666.3 | 1675  | coding    | PF11969 |
| MSTRG.11666.4 | 1594  | coding    | PF11969 |
| MSTRG.11659.1 | 1118  | coding    | PF00050 |
| MSTRG.11659.2 | 1689  | coding    | PF00050 |
| MSTRG.11659.3 | 936   | coding    | PF00050 |
| MSTRG.11659.4 | 10398 | noncoding | —       |
| MSTRG.11674.2 | 1870  | noncoding | —       |
| MSTRG.11675.1 | 1010  | coding    | PF03357 |
| MSTRG.11675.3 | 695   | coding    | PF03357 |
| MSTRG.11676.3 | 3470  | noncoding | —       |
| MSTRG.11678.1 | 3631  | coding    | PF00179 |
| MSTRG.11678.5 | 3486  | coding    | PF00179 |
| MSTRG.11678.3 | 4324  | coding    | PF00179 |
| MSTRG.11679.1 | 1559  | noncoding | —       |
| MSTRG.11680.1 | 5589  | noncoding | —       |
| MSTRG.11680.3 | 5523  | noncoding | —       |
| MSTRG.11677.3 | 4310  | noncoding | —       |
| MSTRG.11683.1 | 2688  | noncoding | —       |
| MSTRG.11684.1 | 6897  | coding    | PF00225 |
| MSTRG.11684.4 | 8749  | coding    | PF00225 |
| MSTRG.11687.2 | 1121  | coding    | PF15181 |
| MSTRG.11696.1 | 1581  | noncoding | —       |
| MSTRG.11697.1 | 1473  | coding    | PF01388 |
| MSTRG.11697.2 | 1260  | coding    | PF01388 |
| MSTRG.11702.1 | 5242  | noncoding | —       |
| MSTRG.11702.3 | 4351  | noncoding | —       |
| MSTRG.11703.1 | 495   | noncoding | —       |
| MSTRG.11707.1 | 2183  | noncoding | —       |
| MSTRG.11708.1 | 700   | noncoding | —       |
| MSTRG.11708.2 | 1889  | noncoding | —       |
| MSTRG.11717.1 | 2199  | coding    | PF10343 |
| MSTRG.11724.2 | 2238  | coding    | PF08067 |
| MSTRG.11724.7 | 1895  | coding    | PF08067 |
| MSTRG.11724.6 | 2658  | coding    | PF08067 |
| MSTRG.11727.1 | 761   | noncoding | —       |
| MSTRG.11728.1 | 7105  | coding    | PF07679 |
| MSTRG.11731.1 | 210   | noncoding | —       |
| MSTRG.11738.1 | 2638  | coding    | PF04112 |
| MSTRG.11738.3 | 2407  | coding    | PF04112 |
| MSTRG.11738.4 | 3864  | coding    | PF01359 |
| MSTRG.11738.6 | 4305  | noncoding | —       |
| MSTRG.11738.7 | 5231  | noncoding | —       |
| MSTRG.11738.8 | 3691  | noncoding | —       |
| MSTRG.11738.9 | 2797  | noncoding | —       |
| MSTRG.11734.3 | 4234  | noncoding | —       |
| MSTRG.11737.2 | 657   | noncoding | —       |

|                |       |           |         |
|----------------|-------|-----------|---------|
| MSTRG.11739.1  | 1867  | noncoding | -       |
| MSTRG.11745.7  | 6734  | coding    | PF16631 |
| MSTRG.11745.8  | 1098  | noncoding | -       |
| MSTRG.11746.1  | 2153  | noncoding | -       |
| MSTRG.11747.1  | 1439  | noncoding | -       |
| MSTRG.11763.3  | 1873  | noncoding | -       |
| MSTRG.11763.4  | 1905  | noncoding | -       |
| MSTRG.11764.1  | 1314  | noncoding | -       |
| MSTRG.11763.5  | 1799  | coding    | PF09127 |
| MSTRG.11765.1  | 1815  | noncoding | -       |
| MSTRG.11763.7  | 1171  | coding    | PF09127 |
| MSTRG.11756.2  | 8007  | coding    | PF12349 |
| MSTRG.11756.6  | 4490  | coding    | PF12349 |
| MSTRG.11761.1  | 863   | noncoding | -       |
| MSTRG.11782.1  | 10628 | noncoding | -       |
| MSTRG.11783.1  | 2871  | noncoding | -       |
| MSTRG.11783.4  | 1755  | noncoding | -       |
| MSTRG.11783.3  | 1578  | noncoding | -       |
| MSTRG.11792.1  | 7174  | coding    | PF14671 |
| MSTRG.11792.3  | 4177  | coding    | PF14671 |
| MSTRG.11792.2  | 3975  | coding    | PF14671 |
| MSTRG.11792.4  | 1844  | coding    | PF14671 |
| MSTRG.11792.13 | 8311  | coding    | PF00164 |
| MSTRG.11793.1  | 618   | noncoding | -       |
| MSTRG.11794.1  | 4649  | coding    | PF02994 |
| MSTRG.11785.1  | 2947  | coding    | PF13911 |
| MSTRG.11786.2  | 570   | coding    | PF01352 |
| MSTRG.11788.1  | 1434  | coding    | PF00112 |
| MSTRG.11788.2  | 1602  | coding    | PF00112 |
| MSTRG.11788.4  | 1226  | coding    | PF00112 |
| MSTRG.11795.1  | 1049  | noncoding | -       |
| MSTRG.11805.1  | 262   | noncoding | -       |
| MSTRG.11806.1  | 4648  | noncoding | -       |
| MSTRG.11807.1  | 1580  | noncoding | -       |
| MSTRG.11810.2  | 2124  | noncoding | -       |
| MSTRG.11814.4  | 1363  | coding    | PF00093 |
| MSTRG.11800.1  | 777   | noncoding | -       |
| MSTRG.11802.3  | 932   | noncoding | -       |
| MSTRG.11802.4  | 772   | noncoding | -       |
| MSTRG.11802.5  | 3396  | noncoding | -       |
| MSTRG.11820.3  | 3766  | noncoding | -       |
| MSTRG.11819.1  | 806   | noncoding | -       |
| MSTRG.11834.2  | 1411  | noncoding | -       |
| MSTRG.11834.3  | 1412  | noncoding | -       |
| MSTRG.11838.1  | 1533  | noncoding | -       |
| MSTRG.11841.4  | 2559  | noncoding | -       |
| MSTRG.11842.3  | 5576  | coding    | PF14650 |
| MSTRG.11842.6  | 4023  | coding    | PF14650 |
| MSTRG.11821.2  | 3285  | coding    | PF14650 |
| MSTRG.11824.2  | 12045 | coding    | PF14650 |
| MSTRG.11824.3  | 16861 | coding    | PF14650 |
| MSTRG.11824.4  | 3269  | noncoding | -       |
| MSTRG.11824.5  | 22513 | coding    | PF14650 |
| MSTRG.11825.3  | 1512  | coding    | PF00780 |



|               |       |           |         |
|---------------|-------|-----------|---------|
| MSTRG.11825.4 | 1611  | noncoding | -       |
| MSTRG.11827.1 | 296   | noncoding | -       |
| MSTRG.11827.3 | 717   | noncoding | -       |
| MSTRG.11827.2 | 918   | noncoding | -       |
| MSTRG.11828.1 | 201   | noncoding | -       |
| MSTRG.11847.2 | 2074  | coding    | PF06529 |
| MSTRG.11852.1 | 4016  | coding    | PF00378 |
| MSTRG.11852.2 | 1320  | coding    | PF00378 |
| MSTRG.11852.3 | 2077  | coding    | PF00378 |
| MSTRG.11852.4 | 1477  | coding    | PF00378 |
| MSTRG.11852.5 | 2667  | coding    | PF00378 |
| MSTRG.11860.1 | 679   | noncoding | -       |
| MSTRG.11861.1 | 1840  | noncoding | -       |
| MSTRG.11854.1 | 386   | noncoding | -       |
| MSTRG.11867.3 | 4018  | coding    | PF02513 |
| MSTRG.11867.4 | 592   | noncoding | -       |
| MSTRG.11867.5 | 507   | noncoding | -       |
| MSTRG.11872.1 | 2033  | noncoding | -       |
| MSTRG.11873.2 | 1594  | noncoding | -       |
| MSTRG.11873.4 | 1968  | coding    | PF00069 |
| MSTRG.11873.3 | 5734  | noncoding | -       |
| MSTRG.11873.7 | 5405  | noncoding | -       |
| MSTRG.11873.8 | 2004  | noncoding | -       |
| MSTRG.11873.6 | 1716  | noncoding | -       |
| MSTRG.11875.1 | 453   | noncoding | -       |
| MSTRG.11876.1 | 3640  | noncoding | -       |
| MSTRG.11876.3 | 4195  | coding    | PF15237 |
| MSTRG.11882.3 | 3069  | noncoding | -       |
| MSTRG.11882.4 | 3111  | coding    | PF01352 |
| MSTRG.11889.1 | 4324  | coding    | PF13923 |
| MSTRG.11889.2 | 5020  | coding    | PF13923 |
| MSTRG.11890.1 | 633   | noncoding | -       |
| MSTRG.11901.1 | 3458  | noncoding | -       |
| MSTRG.11901.2 | 2615  | noncoding | -       |
| MSTRG.11902.1 | 490   | noncoding | -       |
| MSTRG.11923.1 | 332   | noncoding | -       |
| MSTRG.11924.1 | 688   | noncoding | -       |
| MSTRG.11929.1 | 447   | noncoding | -       |
| MSTRG.11950.1 | 366   | noncoding | -       |
| MSTRG.11951.1 | 1397  | noncoding | -       |
| MSTRG.11960.1 | 699   | noncoding | -       |
| MSTRG.11968.1 | 10591 | noncoding | -       |
| MSTRG.11969.1 | 6336  | noncoding | -       |
| MSTRG.11970.1 | 11970 | noncoding | -       |
| MSTRG.11973.4 | 1533  | coding    | PF00022 |
| MSTRG.11973.3 | 1554  | coding    | PF00022 |
| MSTRG.11973.2 | 558   | coding    | PF00022 |
| MSTRG.11973.1 | 1512  | coding    | PF00022 |
| MSTRG.11974.1 | 1698  | coding    | PF00022 |
| MSTRG.11974.2 | 1560  | coding    | PF00022 |
| MSTRG.11974.3 | 1519  | coding    | PF00022 |
| MSTRG.11973.7 | 244   | noncoding | -       |
| MSTRG.11973.8 | 426   | noncoding | -       |
| MSTRG.11973.9 | 2213  | noncoding | -       |

|                  |       |           |         |
|------------------|-------|-----------|---------|
| MSTRG. 11973. 10 | 276   | noncoding | –       |
| MSTRG. 11973. 11 | 364   | noncoding | –       |
| MSTRG. 11973. 12 | 211   | noncoding | –       |
| MSTRG. 11973. 13 | 600   | noncoding | –       |
| MSTRG. 11973. 14 | 608   | noncoding | –       |
| MSTRG. 11973. 15 | 754   | noncoding | –       |
| MSTRG. 11973. 16 | 497   | noncoding | –       |
| MSTRG. 11973. 17 | 254   | noncoding | –       |
| MSTRG. 11973. 18 | 399   | noncoding | –       |
| MSTRG. 11973. 19 | 222   | noncoding | –       |
| MSTRG. 11973. 20 | 355   | noncoding | –       |
| MSTRG. 11973. 21 | 390   | noncoding | –       |
| MSTRG. 11973. 22 | 367   | noncoding | –       |
| MSTRG. 11973. 23 | 338   | noncoding | –       |
| MSTRG. 11973. 24 | 329   | noncoding | –       |
| MSTRG. 11958. 1  | 4650  | coding    | PF09380 |
| MSTRG. 11958. 2  | 4762  | coding    | PF09380 |
| MSTRG. 11972. 1  | 5457  | noncoding | –       |
| MSTRG. 11978. 2  | 710   | coding    | PF03285 |
| MSTRG. 11978. 1  | 6706  | coding    | PF03285 |
| MSTRG. 11979. 1  | 497   | noncoding | –       |
| MSTRG. 11978. 4  | 7302  | noncoding | –       |
| MSTRG. 11978. 5  | 7481  | noncoding | –       |
| MSTRG. 11985. 2  | 10252 | noncoding | –       |
| MSTRG. 11986. 4  | 2530  | coding    | PF00001 |
| MSTRG. 11987. 1  | 839   | noncoding | –       |
| MSTRG. 11995. 1  | 5816  | coding    | PF13001 |
| MSTRG. 11996. 1  | 2981  | noncoding | –       |
| MSTRG. 11995. 6  | 6942  | coding    | PF13001 |
| MSTRG. 11995. 5  | 10021 | coding    | PF13001 |
| MSTRG. 11995. 7  | 8996  | coding    | PF13001 |
| MSTRG. 11995. 8  | 5607  | coding    | PF13001 |
| MSTRG. 11995. 9  | 5765  | coding    | PF13001 |
| MSTRG. 11991. 1  | 6406  | noncoding | –       |
| MSTRG. 11994. 2  | 1610  | coding    | PF16884 |
| MSTRG. 11994. 3  | 1483  | coding    | PF16884 |
| MSTRG. 12000. 1  | 4986  | noncoding | –       |
| MSTRG. 12004. 5  | 10116 | noncoding | –       |
| MSTRG. 12004. 6  | 8900  | coding    | PF04177 |
| MSTRG. 12004. 7  | 2631  | noncoding | –       |
| MSTRG. 12004. 8  | 1954  | noncoding | –       |
| MSTRG. 12004. 9  | 2363  | noncoding | –       |
| MSTRG. 12004. 10 | 1978  | noncoding | –       |
| MSTRG. 12005. 1  | 2940  | noncoding | –       |
| MSTRG. 12004. 11 | 1238  | coding    | PF04177 |
| MSTRG. 12006. 4  | 2522  | noncoding | –       |
| MSTRG. 12007. 1  | 674   | noncoding | –       |
| MSTRG. 12008. 1  | 415   | noncoding | –       |
| MSTRG. 12009. 1  | 299   | noncoding | –       |
| MSTRG. 12019. 2  | 838   | noncoding | –       |
| MSTRG. 12019. 3  | 791   | noncoding | –       |
| MSTRG. 12027. 2  | 3763  | coding    | PF04145 |
| MSTRG. 12023. 1  | 4083  | noncoding | –       |
| MSTRG. 12030. 1  | 2287  | noncoding | –       |

|                |       |           |         |
|----------------|-------|-----------|---------|
| MSTRG.12030.3  | 2584  | noncoding | -       |
| MSTRG.12034.4  | 1737  | coding    | PF15504 |
| MSTRG.12035.1  | 4468  | coding    | PF00615 |
| MSTRG.12039.1  | 936   | noncoding | -       |
| MSTRG.12040.1  | 4121  | noncoding | -       |
| MSTRG.12041.3  | 3364  | noncoding | -       |
| MSTRG.12042.1  | 5931  | noncoding | -       |
| MSTRG.12043.1  | 5105  | noncoding | -       |
| MSTRG.12044.1  | 4867  | noncoding | -       |
| MSTRG.12045.3  | 3373  | noncoding | -       |
| MSTRG.12045.4  | 5406  | coding    | PF12443 |
| MSTRG.12047.3  | 1893  | coding    | PF00595 |
| MSTRG.12053.2  | 2200  | coding    | PF14800 |
| MSTRG.12053.3  | 6639  | coding    | PF14800 |
| MSTRG.12054.1  | 4529  | noncoding | -       |
| MSTRG.12057.4  | 712   | noncoding | -       |
| MSTRG.12055.5  | 6420  | noncoding | -       |
| MSTRG.12055.6  | 9077  | noncoding | -       |
| MSTRG.12055.7  | 1064  | noncoding | -       |
| MSTRG.12055.8  | 12406 | noncoding | -       |
| MSTRG.12055.9  | 4767  | coding    | PF00229 |
| MSTRG.12055.10 | 1898  | noncoding | -       |
| MSTRG.12055.11 | 2869  | noncoding | -       |
| MSTRG.12055.12 | 2418  | noncoding | -       |
| MSTRG.12055.13 | 9720  | noncoding | -       |
| MSTRG.12055.14 | 21455 | coding    | PF00229 |
| MSTRG.12059.1  | 7323  | noncoding | -       |
| MSTRG.12049.1  | 696   | noncoding | -       |
| MSTRG.12050.1  | 923   | noncoding | -       |
| MSTRG.12051.1  | 587   | noncoding | -       |
| MSTRG.12069.1  | 2497  | noncoding | -       |
| MSTRG.12069.2  | 10380 | noncoding | -       |
| MSTRG.12069.5  | 2038  | noncoding | -       |
| MSTRG.12070.1  | 12775 | noncoding | -       |
| MSTRG.12069.7  | 3219  | noncoding | -       |
| MSTRG.12072.3  | 2273  | noncoding | -       |
| MSTRG.12072.10 | 2355  | noncoding | -       |
| MSTRG.12072.9  | 4114  | noncoding | -       |
| MSTRG.12072.12 | 11355 | noncoding | -       |
| MSTRG.12080.1  | 2763  | noncoding | -       |
| MSTRG.12079.1  | 445   | noncoding | -       |
| MSTRG.12088.1  | 647   | noncoding | -       |
| MSTRG.12093.2  | 6139  | coding    | PF00053 |
| MSTRG.12095.3  | 2180  | noncoding | -       |
| MSTRG.12098.1  | 5531  | coding    | PF03091 |
| MSTRG.12099.2  | 2889  | coding    | PF14061 |
| MSTRG.12096.1  | 292   | noncoding | -       |
| MSTRG.12100.1  | 4972  | coding    | PF07678 |
| MSTRG.12100.2  | 5002  | coding    | PF07678 |
| MSTRG.12100.3  | 5160  | coding    | PF07678 |
| MSTRG.12102.1  | 442   | noncoding | -       |
| MSTRG.12108.4  | 7468  | coding    | PF14580 |
| MSTRG.12108.1  | 7646  | coding    | PF14580 |
| MSTRG.12108.9  | 7721  | coding    | PF14580 |

|                  |      |           |         |
|------------------|------|-----------|---------|
| MSTRG. 12108. 8  | 8044 | coding    | PF14580 |
| MSTRG. 12108. 12 | 753  | noncoding | —       |
| MSTRG. 12104. 3  | 3254 | coding    | PF00626 |
| MSTRG. 12121. 2  | 1452 | coding    | PF03607 |
| MSTRG. 12121. 5  | 1256 | coding    | PF03607 |
| MSTRG. 12123. 5  | 1614 | coding    | PF03561 |
| MSTRG. 12123. 2  | 1873 | coding    | PF03561 |
| MSTRG. 12123. 4  | 1854 | coding    | PF03561 |
| MSTRG. 12123. 1  | 2410 | coding    | PF03561 |
| MSTRG. 12123. 3  | 2058 | coding    | PF03561 |
| MSTRG. 12123. 6  | 472  | noncoding | —       |
| MSTRG. 12124. 1  | 567  | noncoding | —       |
| MSTRG. 12124. 2  | 2175 | coding    | PF00059 |
| MSTRG. 12125. 1  | 638  | coding    | PF00059 |
| MSTRG. 12114. 2  | 2331 | coding    | PF03079 |
| MSTRG. 12130. 3  | 3468 | noncoding | —       |
| MSTRG. 12131. 1  | 598  | noncoding | —       |
| MSTRG. 12138. 1  | 1258 | noncoding | —       |
| MSTRG. 12145. 1  | 1795 | noncoding | —       |
| MSTRG. 12146. 1  | 474  | noncoding | —       |
| MSTRG. 12147. 1  | 443  | noncoding | —       |
| MSTRG. 12152. 1  | 712  | noncoding | —       |
| MSTRG. 12153. 2  | 1671 | noncoding | —       |
| MSTRG. 12157. 3  | 2455 | coding    | PF01451 |
| MSTRG. 12157. 4  | 1823 | coding    | PF01451 |
| MSTRG. 12157. 2  | 2133 | coding    | PF01451 |
| MSTRG. 12157. 5  | 672  | coding    | PF01451 |
| MSTRG. 12159. 2  | 3165 | coding    | PF04366 |
| MSTRG. 12159. 1  | 1877 | coding    | PF04366 |
| MSTRG. 12159. 3  | 1134 | noncoding | —       |
| MSTRG. 12160. 1  | 7134 | noncoding | —       |
| MSTRG. 12161. 1  | 1487 | noncoding | —       |
| MSTRG. 12168. 3  | 3366 | noncoding | —       |
| MSTRG. 12188. 1  | 665  | noncoding | —       |
| MSTRG. 12189. 1  | 1567 | noncoding | —       |
| MSTRG. 12189. 3  | 2433 | noncoding | —       |
| MSTRG. 12195. 1  | 7929 | noncoding | —       |
| MSTRG. 12196. 1  | 2274 | noncoding | —       |
| MSTRG. 12197. 2  | 1760 | noncoding | —       |
| MSTRG. 12197. 3  | 3135 | noncoding | —       |
| MSTRG. 12197. 4  | 4138 | coding    | PF07500 |
| MSTRG. 12197. 5  | 4186 | noncoding | —       |
| MSTRG. 12198. 1  | 3164 | noncoding | —       |
| MSTRG. 12202. 1  | 217  | noncoding | —       |
| MSTRG. 12233. 1  | 1742 | noncoding | —       |
| MSTRG. 12238. 1  | 4955 | noncoding | —       |
| MSTRG. 12246. 2  | 4677 | noncoding | —       |
| MSTRG. 12208. 1  | 523  | noncoding | —       |
| MSTRG. 12214. 5  | 9228 | noncoding | —       |
| MSTRG. 12214. 6  | 1700 | noncoding | —       |
| MSTRG. 12214. 8  | 4234 | noncoding | —       |
| MSTRG. 12215. 1  | 1417 | noncoding | —       |
| MSTRG. 12207. 1  | 1664 | noncoding | —       |
| MSTRG. 12218. 5  | 2335 | coding    | PF01412 |

|               |       |           |         |
|---------------|-------|-----------|---------|
| MSTRG.12218.6 | 2217  | coding    | PF01412 |
| MSTRG.12224.1 | 1025  | noncoding | -       |
| MSTRG.12228.1 | 1074  | noncoding | -       |
| MSTRG.12274.1 | 414   | noncoding | -       |
| MSTRG.12277.1 | 7243  | coding    | PF01359 |
| MSTRG.12278.2 | 388   | noncoding | -       |
| MSTRG.12279.1 | 1774  | noncoding | -       |
| MSTRG.12280.1 | 4965  | coding    | PF00078 |
| MSTRG.12280.2 | 8008  | noncoding | -       |
| MSTRG.12280.3 | 4293  | noncoding | -       |
| MSTRG.12281.1 | 2042  | noncoding | -       |
| MSTRG.12281.2 | 2919  | noncoding | -       |
| MSTRG.12285.2 | 2253  | coding    | PF01134 |
| MSTRG.12288.2 | 1581  | coding    | PF00009 |
| MSTRG.12288.3 | 2024  | coding    | PF00009 |
| MSTRG.12302.2 | 1647  | coding    | PF03381 |
| MSTRG.12303.1 | 1269  | noncoding | -       |
| MSTRG.12302.3 | 2913  | coding    | PF03381 |
| MSTRG.12302.4 | 1201  | coding    | PF03381 |
| MSTRG.12302.5 | 2178  | coding    | PF03381 |
| MSTRG.12320.2 | 4462  | coding    | PF02902 |
| MSTRG.12320.4 | 4338  | coding    | PF02902 |
| MSTRG.12320.5 | 7520  | coding    | PF02902 |
| MSTRG.12320.7 | 4101  | coding    | PF02902 |
| MSTRG.12322.1 | 8462  | coding    | PF00063 |
| MSTRG.12323.1 | 930   | noncoding | -       |
| MSTRG.12322.3 | 719   | noncoding | -       |
| MSTRG.12347.5 | 6775  | coding    | PF00439 |
| MSTRG.12347.6 | 10564 | coding    | PF00439 |
| MSTRG.12347.7 | 10374 | coding    | PF00439 |
| MSTRG.12347.8 | 6116  | coding    | PF00439 |
| MSTRG.12351.1 | 1882  | noncoding | -       |
| MSTRG.12352.1 | 963   | noncoding | -       |
| MSTRG.12340.2 | 3009  | coding    | PF15619 |
| MSTRG.12340.4 | 2956  | coding    | PF15619 |
| MSTRG.12340.3 | 3458  | coding    | PF15619 |
| MSTRG.12341.1 | 4798  | noncoding | -       |
| MSTRG.12342.1 | 2550  | noncoding | -       |
| MSTRG.12353.1 | 408   | noncoding | -       |
| MSTRG.12356.1 | 587   | noncoding | -       |
| MSTRG.12355.2 | 2518  | coding    | PF02780 |
| MSTRG.12360.3 | 5210  | coding    | PF07984 |
| MSTRG.12359.1 | 277   | noncoding | -       |
| MSTRG.12416.1 | 2328  | noncoding | -       |
| MSTRG.12425.1 | 1161  | noncoding | -       |
| MSTRG.12426.2 | 14279 | noncoding | -       |
| MSTRG.12433.1 | 2024  | noncoding | -       |
| MSTRG.12434.4 | 7554  | coding    | PF04118 |
| MSTRG.12434.5 | 9457  | coding    | PF04118 |
| MSTRG.12434.7 | 7656  | coding    | PF04118 |
| MSTRG.12434.8 | 8098  | coding    | PF04118 |
| MSTRG.12435.2 | 2197  | noncoding | -       |
| MSTRG.12439.2 | 3322  | coding    | PF03949 |
| MSTRG.12440.1 | 6524  | noncoding | -       |

|               |       |           |         |
|---------------|-------|-----------|---------|
| MSTRG.12441.1 | 8970  | coding    | PF02994 |
| MSTRG.12442.1 | 5460  | noncoding | —       |
| MSTRG.12442.2 | 5923  | noncoding | —       |
| MSTRG.12441.2 | 7173  | noncoding | —       |
| MSTRG.12439.3 | 5173  | noncoding | —       |
| MSTRG.12439.4 | 6643  | coding    | PF00390 |
| MSTRG.12384.2 | 4324  | coding    | PF07651 |
| MSTRG.12384.1 | 4238  | coding    | PF07651 |
| MSTRG.12384.3 | 2509  | coding    | PF01728 |
| MSTRG.12389.1 | 1043  | noncoding | —       |
| MSTRG.12390.3 | 1349  | noncoding | —       |
| MSTRG.12391.1 | 5150  | noncoding | —       |
| MSTRG.12391.2 | 3116  | noncoding | —       |
| MSTRG.12392.1 | 353   | noncoding | —       |
| MSTRG.12395.1 | 427   | coding    | PF15510 |
| MSTRG.12407.1 | 2049  | noncoding | —       |
| MSTRG.12400.2 | 1509  | noncoding | —       |
| MSTRG.12447.5 | 4009  | coding    | PF07534 |
| MSTRG.12448.1 | 2203  | noncoding | —       |
| MSTRG.12449.1 | 5588  | noncoding | —       |
| MSTRG.12450.1 | 7779  | noncoding | —       |
| MSTRG.12444.1 | 1615  | noncoding | —       |
| MSTRG.12445.2 | 775   | coding    | PF13023 |
| MSTRG.12474.3 | 1438  | coding    | PF02827 |
| MSTRG.12474.5 | 1365  | coding    | PF02827 |
| MSTRG.12474.2 | 1147  | coding    | PF02827 |
| MSTRG.12474.4 | 1954  | coding    | PF02827 |
| MSTRG.12474.1 | 1224  | coding    | PF02827 |
| MSTRG.12474.7 | 1370  | coding    | PF02827 |
| MSTRG.12474.6 | 1138  | coding    | PF02827 |
| MSTRG.12474.9 | 1505  | coding    | PF02827 |
| MSTRG.12474.8 | 1110  | coding    | PF02827 |
| MSTRG.12475.1 | 2887  | coding    | PF03348 |
| MSTRG.12475.2 | 2780  | coding    | PF03348 |
| MSTRG.12475.3 | 2784  | coding    | PF03348 |
| MSTRG.12475.5 | 5176  | coding    | PF03348 |
| MSTRG.12476.1 | 2800  | coding    | PF00447 |
| MSTRG.12476.2 | 2222  | coding    | PF00447 |
| MSTRG.12476.3 | 3191  | coding    | PF00447 |
| MSTRG.12476.7 | 2395  | coding    | PF00447 |
| MSTRG.12476.8 | 2492  | coding    | PF00447 |
| MSTRG.12476.6 | 2231  | coding    | PF00447 |
| MSTRG.12476.9 | 2414  | coding    | PF00447 |
| MSTRG.12494.1 | 2751  | noncoding | —       |
| MSTRG.12495.1 | 2235  | noncoding | —       |
| MSTRG.12495.2 | 3721  | noncoding | —       |
| MSTRG.12504.1 | 557   | noncoding | —       |
| MSTRG.12504.2 | 858   | noncoding | —       |
| MSTRG.12505.1 | 14178 | noncoding | —       |
| MSTRG.12506.1 | 5354  | coding    | PF00078 |
| MSTRG.12507.1 | 449   | noncoding | —       |
| MSTRG.12505.2 | 4118  | noncoding | —       |
| MSTRG.12501.1 | 4254  | coding    | PF15665 |
| MSTRG.12501.3 | 1242  | noncoding | —       |

|               |       |           |         |
|---------------|-------|-----------|---------|
| MSTRG.12509.1 | 1796  | noncoding | -       |
| MSTRG.12510.2 | 2764  | noncoding | -       |
| MSTRG.12510.3 | 6952  | noncoding | -       |
| MSTRG.12510.4 | 2507  | noncoding | -       |
| MSTRG.12517.3 | 1653  | coding    | PF00595 |
| MSTRG.12521.1 | 554   | noncoding | -       |
| MSTRG.12525.2 | 3830  | coding    | PF02257 |
| MSTRG.12525.1 | 4149  | coding    | PF02257 |
| MSTRG.12525.3 | 4494  | coding    | PF02257 |
| MSTRG.12528.3 | 1393  | noncoding | -       |
| MSTRG.12537.2 | 3109  | coding    | PF00956 |
| MSTRG.12553.1 | 2358  | noncoding | -       |
| MSTRG.12558.1 | 1334  | noncoding | -       |
| MSTRG.12558.2 | 600   | noncoding | -       |
| MSTRG.12558.3 | 2613  | noncoding | -       |
| MSTRG.12560.1 | 18790 | noncoding | -       |
| MSTRG.12550.2 | 2197  | coding    | PF00850 |
| MSTRG.12550.3 | 1947  | coding    | PF00850 |
| MSTRG.12569.1 | 472   | noncoding | -       |
| MSTRG.12572.1 | 339   | noncoding | -       |
| MSTRG.12573.1 | 247   | noncoding | -       |
| MSTRG.12576.3 | 628   | coding    | PF14982 |
| MSTRG.12576.4 | 648   | coding    | PF14982 |
| MSTRG.12577.7 | 1497  | coding    | PF00091 |
| MSTRG.12577.5 | 1641  | coding    | PF00091 |
| MSTRG.12577.4 | 1492  | coding    | PF03953 |
| MSTRG.12578.4 | 5308  | coding    | PF07714 |
| MSTRG.12588.1 | 10685 | coding    | PF15735 |
| MSTRG.12588.2 | 10813 | coding    | PF15735 |
| MSTRG.12588.3 | 10652 | coding    | PF15735 |
| MSTRG.12588.5 | 10379 | coding    | PF15735 |
| MSTRG.12589.1 | 854   | noncoding | -       |
| MSTRG.12589.2 | 2802  | noncoding | -       |
| MSTRG.12589.3 | 1502  | noncoding | -       |
| MSTRG.12589.4 | 820   | noncoding | -       |
| MSTRG.12591.1 | 3693  | noncoding | -       |
| MSTRG.12595.2 | 620   | noncoding | -       |
| MSTRG.12596.3 | 2452  | coding    | PF01536 |
| MSTRG.12596.4 | 9526  | noncoding | -       |
| MSTRG.12596.5 | 3536  | noncoding | -       |
| MSTRG.12599.1 | 4843  | noncoding | -       |
| MSTRG.12598.4 | 9348  | coding    | PF00069 |
| MSTRG.12600.1 | 4065  | noncoding | -       |
| MSTRG.12598.5 | 6129  | coding    | PF00069 |
| MSTRG.12598.6 | 1516  | noncoding | -       |
| MSTRG.12598.8 | 6392  | coding    | PF00069 |
| MSTRG.12598.9 | 5338  | coding    | PF00069 |
| MSTRG.12601.1 | 894   | noncoding | -       |
| MSTRG.12602.1 | 1752  | noncoding | -       |
| MSTRG.12602.3 | 896   | noncoding | -       |
| MSTRG.12602.2 | 494   | noncoding | -       |
| MSTRG.12602.4 | 761   | noncoding | -       |
| MSTRG.12603.1 | 1508  | noncoding | -       |
| MSTRG.12603.2 | 1389  | noncoding | -       |

|               |       |           |         |
|---------------|-------|-----------|---------|
| MSTRG.12603.3 | 1896  | noncoding | —       |
| MSTRG.12603.4 | 1277  | noncoding | —       |
| MSTRG.12607.2 | 3699  | noncoding | —       |
| MSTRG.12607.3 | 2563  | noncoding | —       |
| MSTRG.12611.5 | 6578  | coding    | PF00406 |
| MSTRG.12611.3 | 6449  | coding    | PF00406 |
| MSTRG.12611.7 | 6585  | coding    | PF00406 |
| MSTRG.12612.1 | 1533  | noncoding | —       |
| MSTRG.12612.2 | 2525  | noncoding | —       |
| MSTRG.12617.2 | 1565  | noncoding | —       |
| MSTRG.12617.3 | 1569  | noncoding | —       |
| MSTRG.12619.1 | 1964  | noncoding | —       |
| MSTRG.12618.2 | 1129  | noncoding | —       |
| MSTRG.12618.3 | 7364  | noncoding | —       |
| MSTRG.12619.2 | 1867  | noncoding | —       |
| MSTRG.12619.3 | 1903  | noncoding | —       |
| MSTRG.12642.1 | 3471  | noncoding | —       |
| MSTRG.12643.1 | 4675  | noncoding | —       |
| MSTRG.12646.3 | 1136  | coding    | PF04636 |
| MSTRG.12647.1 | 3628  | noncoding | —       |
| MSTRG.12642.2 | 3100  | noncoding | —       |
| MSTRG.12648.1 | 1757  | noncoding | —       |
| MSTRG.12646.5 | 1790  | coding    | PF04636 |
| MSTRG.12646.4 | 2204  | coding    | PF04636 |
| MSTRG.12646.6 | 1279  | coding    | PF04636 |
| MSTRG.12652.3 | 2483  | noncoding | —       |
| MSTRG.12652.4 | 1353  | noncoding | —       |
| MSTRG.12623.3 | 7618  | coding    | PF16676 |
| MSTRG.12623.4 | 7329  | coding    | PF16676 |
| MSTRG.12623.6 | 9662  | coding    | PF16676 |
| MSTRG.12623.5 | 2096  | coding    | PF16676 |
| MSTRG.12625.2 | 1585  | coding    | PF03969 |
| MSTRG.12625.3 | 1296  | coding    | PF03969 |
| MSTRG.12627.1 | 1469  | coding    | PF00105 |
| MSTRG.12627.2 | 2362  | coding    | PF00104 |
| MSTRG.12633.2 | 3025  | coding    | PF09777 |
| MSTRG.12635.1 | 4392  | coding    | PF00226 |
| MSTRG.12655.1 | 468   | noncoding | —       |
| MSTRG.12660.1 | 1529  | noncoding | —       |
| MSTRG.12661.2 | 1142  | noncoding | —       |
| MSTRG.12664.1 | 2568  | noncoding | —       |
| MSTRG.12674.3 | 950   | coding    | PF13602 |
| MSTRG.12676.1 | 8622  | coding    | PF00030 |
| MSTRG.12677.2 | 2056  | coding    | PF04106 |
| MSTRG.12680.1 | 318   | noncoding | —       |
| MSTRG.12681.2 | 2630  | coding    | PF02897 |
| MSTRG.12682.1 | 1788  | coding    | PF04831 |
| MSTRG.12685.1 | 6955  | coding    | PF00313 |
| MSTRG.12685.2 | 5199  | coding    | PF00313 |
| MSTRG.12686.1 | 362   | noncoding | —       |
| MSTRG.12683.2 | 2892  | coding    | PF00632 |
| MSTRG.12709.4 | 2543  | noncoding | —       |
| MSTRG.12711.1 | 5705  | coding    | PF01359 |
| MSTRG.12711.2 | 23852 | coding    | PF01359 |



|               |       |           |         |
|---------------|-------|-----------|---------|
| MSTRG.12711.3 | 23540 | coding    | PF02994 |
| MSTRG.12709.6 | 6235  | noncoding | —       |
| MSTRG.12713.1 | 7513  | noncoding | —       |
| MSTRG.12715.1 | 11289 | noncoding | —       |
| MSTRG.12701.1 | 224   | noncoding | —       |
| MSTRG.12716.1 | 4592  | coding    | PF00060 |
| MSTRG.12716.2 | 4483  | coding    | PF00060 |
| MSTRG.12716.3 | 4862  | coding    | PF10613 |
| MSTRG.12717.1 | 2546  | noncoding | —       |
| MSTRG.12716.4 | 9199  | noncoding | —       |
| MSTRG.12718.1 | 3824  | noncoding | —       |
| MSTRG.12716.5 | 1502  | noncoding | —       |
| MSTRG.12705.2 | 265   | noncoding | —       |
| MSTRG.12705.4 | 1367  | noncoding | —       |
| MSTRG.12705.3 | 7677  | coding    | PF02889 |
| MSTRG.12705.5 | 3704  | coding    | PF02889 |
| MSTRG.12730.2 | 2060  | noncoding | —       |
| MSTRG.12731.3 | 3091  | noncoding | —       |
| MSTRG.12731.2 | 5635  | coding    | PF15996 |
| MSTRG.12731.4 | 3291  | noncoding | —       |
| MSTRG.12731.6 | 6719  | coding    | PF15996 |
| MSTRG.12731.7 | 6661  | coding    | PF15996 |
| MSTRG.12731.8 | 5640  | coding    | PF15996 |
| MSTRG.12720.2 | 1277  | noncoding | —       |
| MSTRG.12721.3 | 1897  | noncoding | —       |
| MSTRG.12722.1 | 330   | noncoding | —       |
| MSTRG.12725.1 | 420   | noncoding | —       |
| MSTRG.12725.2 | 425   | noncoding | —       |
| MSTRG.12738.3 | 1017  | noncoding | —       |
| MSTRG.12746.1 | 1569  | coding    | PF16317 |
| MSTRG.12759.1 | 331   | noncoding | —       |
| MSTRG.12768.1 | 786   | noncoding | —       |
| MSTRG.12769.1 | 1218  | noncoding | —       |
| MSTRG.12791.1 | 7581  | noncoding | —       |
| MSTRG.12791.2 | 6889  | noncoding | —       |
| MSTRG.12792.1 | 18091 | coding    | PF07728 |
| MSTRG.12792.2 | 18269 | coding    | PF07728 |
| MSTRG.12792.3 | 18130 | coding    | PF07728 |
| MSTRG.12792.6 | 1882  | noncoding | —       |
| MSTRG.12793.2 | 1978  | coding    | PF05347 |
| MSTRG.12794.1 | 1021  | noncoding | —       |
| MSTRG.12794.2 | 648   | noncoding | —       |
| MSTRG.12777.1 | 4425  | coding    | PF04670 |
| MSTRG.12778.1 | 1858  | coding    | PF00179 |
| MSTRG.12784.1 | 596   | noncoding | —       |
| MSTRG.12785.2 | 5971  | noncoding | —       |
| MSTRG.12785.3 | 7237  | noncoding | —       |
| MSTRG.12785.4 | 5574  | noncoding | —       |
| MSTRG.12789.3 | 4282  | coding    | PF01331 |
| MSTRG.12800.1 | 1198  | noncoding | —       |
| MSTRG.12800.2 | 1046  | noncoding | —       |
| MSTRG.12800.3 | 1050  | noncoding | —       |
| MSTRG.12804.2 | 2271  | noncoding | —       |
| MSTRG.12805.3 | 1798  | coding    | PF07034 |

|                |       |           |         |
|----------------|-------|-----------|---------|
| MSTRG.12806.2  | 2497  | coding    | PF00750 |
| MSTRG.12806.1  | 2882  | coding    | PF00750 |
| MSTRG.12806.4  | 2584  | coding    | PF00750 |
| MSTRG.12806.5  | 3273  | coding    | PF00750 |
| MSTRG.12808.2  | 1597  | coding    | PF04142 |
| MSTRG.12810.1  | 12164 | coding    | PF02994 |
| MSTRG.12813.1  | 2631  | noncoding | -       |
| MSTRG.12816.1  | 1115  | noncoding | -       |
| MSTRG.12829.1  | 7464  | coding    | PF00076 |
| MSTRG.12829.6  | 3597  | coding    | PF00076 |
| MSTRG.12829.4  | 2295  | coding    | PF00076 |
| MSTRG.12829.7  | 3136  | coding    | PF00076 |
| MSTRG.12830.4  | 2860  | coding    | PF00787 |
| MSTRG.12831.1  | 4084  | noncoding | -       |
| MSTRG.12835.1  | 293   | noncoding | -       |
| MSTRG.12826.1  | 1610  | noncoding | -       |
| MSTRG.12826.2  | 1844  | noncoding | -       |
| MSTRG.12827.1  | 329   | noncoding | -       |
| MSTRG.12839.2  | 2292  | noncoding | -       |
| MSTRG.12847.3  | 2294  | coding    | PF00102 |
| MSTRG.12847.4  | 2288  | coding    | PF00102 |
| MSTRG.12848.1  | 1419  | noncoding | -       |
| MSTRG.12851.2  | 2970  | coding    | PF00620 |
| MSTRG.12851.3  | 2431  | coding    | PF00620 |
| MSTRG.12863.6  | 6078  | coding    | PF05902 |
| MSTRG.12863.7  | 6238  | coding    | PF05902 |
| MSTRG.12863.14 | 5872  | coding    | PF05902 |
| MSTRG.12863.16 | 6008  | coding    | PF05902 |
| MSTRG.12863.11 | 4590  | coding    | PF05902 |
| MSTRG.12863.13 | 4870  | coding    | PF05902 |
| MSTRG.12863.15 | 4213  | coding    | PF05902 |
| MSTRG.12863.12 | 4045  | coding    | PF05902 |
| MSTRG.12863.18 | 3411  | coding    | PF05902 |
| MSTRG.12863.17 | 3509  | coding    | PF05902 |
| MSTRG.12863.19 | 7169  | noncoding | -       |
| MSTRG.12864.1  | 6043  | noncoding | -       |
| MSTRG.12863.20 | 465   | noncoding | -       |
| MSTRG.12888.1  | 3284  | noncoding | -       |
| MSTRG.12890.2  | 2959  | coding    | PF00352 |
| MSTRG.12890.4  | 2282  | coding    | PF00352 |
| MSTRG.12907.3  | 2814  | coding    | PF00009 |
| MSTRG.12907.2  | 6797  | coding    | PF00009 |
| MSTRG.12907.4  | 2580  | coding    | PF00009 |
| MSTRG.12907.5  | 3373  | noncoding | -       |
| MSTRG.12907.6  | 5679  | noncoding | -       |
| MSTRG.12912.3  | 4084  | coding    | PF00018 |
| MSTRG.12912.4  | 3583  | coding    | PF00018 |
| MSTRG.12914.1  | 900   | noncoding | -       |
| MSTRG.12933.4  | 3603  | noncoding | -       |
| MSTRG.12933.6  | 4757  | noncoding | -       |
| MSTRG.12933.5  | 3609  | noncoding | -       |
| MSTRG.12933.3  | 7558  | noncoding | -       |
| MSTRG.12933.7  | 7684  | noncoding | -       |
| MSTRG.12933.8  | 3880  | noncoding | -       |

|                |       |           |         |
|----------------|-------|-----------|---------|
| MSTRG.12934.1  | 2128  | noncoding | -       |
| MSTRG.12919.1  | 1708  | noncoding | -       |
| MSTRG.12920.1  | 1791  | coding    | PF01108 |
| MSTRG.12920.2  | 2140  | coding    | PF01108 |
| MSTRG.12925.1  | 348   | noncoding | -       |
| MSTRG.12925.2  | 284   | noncoding | -       |
| MSTRG.12926.1  | 302   | noncoding | -       |
| MSTRG.12938.1  | 1043  | noncoding | -       |
| MSTRG.12947.3  | 6974  | coding    | PF15273 |
| MSTRG.12947.2  | 7130  | coding    | PF15273 |
| MSTRG.12971.1  | 12458 | noncoding | -       |
| MSTRG.12978.1  | 746   | noncoding | -       |
| MSTRG.12978.2  | 18716 | noncoding | -       |
| MSTRG.12978.3  | 12222 | noncoding | -       |
| MSTRG.12983.5  | 2596  | coding    | PF12763 |
| MSTRG.12984.1  | 378   | noncoding | -       |
| MSTRG.12939.1  | 5109  | coding    | PF16002 |
| MSTRG.12939.2  | 3184  | coding    | PF16002 |
| MSTRG.12939.3  | 3418  | coding    | PF16002 |
| MSTRG.12940.1  | 2957  | noncoding | -       |
| MSTRG.12939.4  | 3151  | coding    | PF16002 |
| MSTRG.12939.5  | 5835  | coding    | PF16002 |
| MSTRG.12988.1  | 5831  | noncoding | -       |
| MSTRG.13003.1  | 2893  | noncoding | -       |
| MSTRG.13008.1  | 2202  | noncoding | -       |
| MSTRG.13008.2  | 1978  | noncoding | -       |
| MSTRG.13009.1  | 1894  | noncoding | -       |
| MSTRG.13010.1  | 228   | noncoding | -       |
| MSTRG.13012.1  | 1092  | noncoding | -       |
| MSTRG.13013.1  | 3299  | noncoding | -       |
| MSTRG.13013.2  | 13443 | noncoding | -       |
| MSTRG.13013.6  | 853   | noncoding | -       |
| MSTRG.13013.4  | 8489  | noncoding | -       |
| MSTRG.13013.5  | 7190  | coding    | PF04750 |
| MSTRG.13014.1  | 1225  | noncoding | -       |
| MSTRG.13022.1  | 27763 | noncoding | -       |
| MSTRG.13022.2  | 4485  | noncoding | -       |
| MSTRG.13025.2  | 24787 | noncoding | -       |
| MSTRG.13025.4  | 60730 | noncoding | -       |
| MSTRG.13025.5  | 12443 | noncoding | -       |
| MSTRG.13025.7  | 12028 | noncoding | -       |
| MSTRG.13025.8  | 12361 | noncoding | -       |
| MSTRG.13025.9  | 19710 | noncoding | -       |
| MSTRG.13025.10 | 6661  | noncoding | -       |
| MSTRG.13025.11 | 18149 | noncoding | -       |
| MSTRG.13025.12 | 7247  | noncoding | -       |
| MSTRG.13030.3  | 3967  | coding    | PF00307 |
| MSTRG.13030.1  | 12150 | coding    | PF09069 |
| MSTRG.13034.1  | 287   | noncoding | -       |
| MSTRG.13034.2  | 417   | noncoding | -       |
| MSTRG.13034.3  | 412   | noncoding | -       |
| MSTRG.13040.4  | 7808  | noncoding | -       |
| MSTRG.13040.6  | 5955  | noncoding | -       |
| MSTRG.13039.1  | 238   | noncoding | -       |

|               |       |           |         |
|---------------|-------|-----------|---------|
| MSTRG.13048.1 | 9162  | coding    | PF08366 |
| MSTRG.13049.1 | 892   | noncoding | —       |
| MSTRG.13055.1 | 1968  | noncoding | —       |
| MSTRG.13053.1 | 565   | noncoding | —       |
| MSTRG.13056.2 | 3764  | noncoding | —       |
| MSTRG.13061.1 | 3057  | noncoding | —       |
| MSTRG.13061.3 | 10573 | noncoding | —       |
| MSTRG.13062.1 | 2397  | noncoding | —       |
| MSTRG.13061.5 | 3296  | noncoding | —       |
| MSTRG.13060.1 | 2265  | coding    | PF11977 |
| MSTRG.13063.1 | 1895  | noncoding | —       |
| MSTRG.13065.2 | 1165  | noncoding | —       |
| MSTRG.13066.3 | 1696  | coding    | PF00004 |
| MSTRG.13068.1 | 253   | noncoding | —       |
| MSTRG.13077.4 | 1830  | coding    | PF01135 |
| MSTRG.13078.1 | 1142  | noncoding | —       |
| MSTRG.13079.2 | 1146  | coding    | PF07502 |
| MSTRG.13082.3 | 688   | noncoding | —       |
| MSTRG.13082.4 | 1076  | noncoding | —       |
| MSTRG.13082.2 | 1313  | noncoding | —       |
| MSTRG.13087.1 | 8486  | noncoding | —       |
| MSTRG.13087.2 | 8382  | noncoding | —       |
| MSTRG.13087.4 | 10676 | noncoding | —       |
| MSTRG.13087.6 | 8355  | noncoding | —       |
| MSTRG.13091.2 | 9218  | noncoding | —       |
| MSTRG.13096.2 | 4805  | coding    | PF01937 |
| MSTRG.13106.2 | 27569 | noncoding | —       |
| MSTRG.13106.1 | 27755 | noncoding | —       |
| MSTRG.13106.3 | 27747 | noncoding | —       |
| MSTRG.13107.1 | 1003  | noncoding | —       |
| MSTRG.13100.4 | 1024  | coding    | PF00472 |
| MSTRG.13110.4 | 7654  | noncoding | —       |
| MSTRG.13110.3 | 5840  | noncoding | —       |
| MSTRG.13110.5 | 4920  | noncoding | —       |
| MSTRG.13110.6 | 3600  | noncoding | —       |
| MSTRG.13110.7 | 4504  | noncoding | —       |
| MSTRG.13111.1 | 1287  | noncoding | —       |
| MSTRG.13112.1 | 2596  | noncoding | —       |
| MSTRG.13115.1 | 7305  | coding    | PF00621 |
| MSTRG.13117.1 | 442   | noncoding | —       |
| MSTRG.13115.2 | 6807  | coding    | PF00621 |
| MSTRG.13118.2 | 1768  | coding    | PF00398 |
| MSTRG.13119.1 | 9309  | noncoding | —       |
| MSTRG.13120.1 | 938   | noncoding | —       |
| MSTRG.13118.4 | 2585  | coding    | PF00398 |
| MSTRG.13118.5 | 1808  | coding    | PF00398 |
| MSTRG.13143.4 | 8153  | coding    | PF12031 |
| MSTRG.13143.6 | 4991  | coding    | PF01388 |
| MSTRG.13143.5 | 5581  | coding    | PF12031 |
| MSTRG.13143.7 | 6870  | coding    | PF12031 |
| MSTRG.13144.1 | 12965 | noncoding | —       |
| MSTRG.13143.8 | 7608  | coding    | PF12031 |
| MSTRG.13143.9 | 5947  | coding    | PF12031 |
| MSTRG.13145.1 | 972   | noncoding | —       |

|                  |       |           |         |
|------------------|-------|-----------|---------|
| MSTRG. 13146. 1  | 4938  | noncoding | -       |
| MSTRG. 13143. 10 | 840   | noncoding | -       |
| MSTRG. 13148. 1  | 4702  | noncoding | -       |
| MSTRG. 13149. 1  | 7817  | noncoding | -       |
| MSTRG. 13150. 1  | 3081  | noncoding | -       |
| MSTRG. 13151. 1  | 5709  | noncoding | -       |
| MSTRG. 13152. 1  | 4471  | noncoding | -       |
| MSTRG. 13152. 2  | 5686  | noncoding | -       |
| MSTRG. 13143. 11 | 4039  | noncoding | -       |
| MSTRG. 13143. 12 | 3756  | coding    | PF12031 |
| MSTRG. 13130. 1  | 416   | noncoding | -       |
| MSTRG. 13134. 1  | 2196  | noncoding | -       |
| MSTRG. 13137. 1  | 2571  | noncoding | -       |
| MSTRG. 13138. 3  | 2768  | noncoding | -       |
| MSTRG. 13138. 5  | 2030  | coding    | PF01529 |
| MSTRG. 13138. 6  | 1079  | noncoding | -       |
| MSTRG. 13139. 1  | 9449  | noncoding | -       |
| MSTRG. 13139. 2  | 5368  | noncoding | -       |
| MSTRG. 13139. 3  | 13889 | noncoding | -       |
| MSTRG. 13139. 4  | 7270  | noncoding | -       |
| MSTRG. 13139. 5  | 22132 | noncoding | -       |
| MSTRG. 13128. 2  | 3036  | coding    | PF10456 |
| MSTRG. 13128. 3  | 2743  | coding    | PF10456 |
| MSTRG. 13128. 4  | 2829  | coding    | PF10456 |
| MSTRG. 13154. 1  | 844   | noncoding | -       |
| MSTRG. 13154. 2  | 388   | noncoding | -       |
| MSTRG. 13154. 3  | 1007  | noncoding | -       |
| MSTRG. 13154. 4  | 1029  | noncoding | -       |
| MSTRG. 13155. 2  | 2395  | noncoding | -       |
| MSTRG. 13162. 1  | 3269  | noncoding | -       |
| MSTRG. 13163. 1  | 9280  | noncoding | -       |
| MSTRG. 13164. 1  | 23923 | noncoding | -       |
| MSTRG. 13161. 6  | 6216  | coding    | PF01167 |
| MSTRG. 13161. 4  | 6057  | coding    | PF01167 |
| MSTRG. 13161. 7  | 6196  | coding    | PF01167 |
| MSTRG. 13161. 5  | 13916 | coding    | PF01167 |
| MSTRG. 13165. 1  | 439   | noncoding | -       |
| MSTRG. 13159. 2  | 4674  | coding    | PF06664 |
| MSTRG. 13159. 3  | 4633  | coding    | PF06664 |
| MSTRG. 13159. 4  | 3551  | coding    | PF06664 |
| MSTRG. 13166. 1  | 2756  | coding    | PF02318 |
| MSTRG. 13170. 3  | 607   | noncoding | -       |
| MSTRG. 13171. 1  | 3596  | coding    | PF02777 |
| MSTRG. 13177. 1  | 2146  | coding    | PF00118 |
| MSTRG. 13177. 4  | 3666  | noncoding | -       |
| MSTRG. 13177. 5  | 1471  | noncoding | -       |
| MSTRG. 13174. 1  | 8993  | coding    | PF00878 |
| MSTRG. 13181. 3  | 5365  | coding    | PF00069 |
| MSTRG. 13181. 4  | 5282  | coding    | PF00069 |
| MSTRG. 13181. 5  | 5112  | coding    | PF00069 |
| MSTRG. 13179. 1  | 768   | noncoding | -       |
| MSTRG. 13179. 3  | 595   | noncoding | -       |
| MSTRG. 13179. 2  | 932   | noncoding | -       |
| MSTRG. 13180. 1  | 2305  | noncoding | -       |

|                |       |           |         |
|----------------|-------|-----------|---------|
| MSTRG.13184.1  | 3860  | coding    | PF00240 |
| MSTRG.13184.2  | 1981  | coding    | PF00240 |
| MSTRG.13199.1  | 1410  | coding    | PF10274 |
| MSTRG.13199.2  | 1124  | coding    | PF10274 |
| MSTRG.13201.1  | 894   | noncoding | —       |
| MSTRG.13183.1  | 891   | noncoding | —       |
| MSTRG.13206.2  | 526   | noncoding | —       |
| MSTRG.13208.1  | 13581 | coding    | PF16544 |
| MSTRG.13208.4  | 7705  | coding    | PF16544 |
| MSTRG.13209.1  | 12566 | noncoding | —       |
| MSTRG.13209.2  | 15529 | noncoding | —       |
| MSTRG.13203.1  | 785   | noncoding | —       |
| MSTRG.13217.1  | 202   | noncoding | —       |
| MSTRG.13221.2  | 1312  | noncoding | —       |
| MSTRG.13222.1  | 4573  | coding    | PF00233 |
| MSTRG.13222.2  | 9868  | coding    | PF00233 |
| MSTRG.13222.3  | 7950  | coding    | PF00233 |
| MSTRG.13222.6  | 3946  | noncoding | —       |
| MSTRG.13223.1  | 3376  | noncoding | —       |
| MSTRG.13224.1  | 2284  | noncoding | —       |
| MSTRG.13222.7  | 3417  | noncoding | —       |
| MSTRG.13233.1  | 5182  | coding    | PF00069 |
| MSTRG.13237.1  | 1690  | noncoding | —       |
| MSTRG.13241.3  | 1880  | noncoding | —       |
| MSTRG.13241.4  | 2412  | coding    | PF09398 |
| MSTRG.13241.5  | 2405  | coding    | PF09398 |
| MSTRG.13241.6  | 2794  | noncoding | —       |
| MSTRG.13243.1  | 1565  | coding    | PF07202 |
| MSTRG.13243.2  | 741   | coding    | PF07202 |
| MSTRG.13243.3  | 734   | coding    | PF07202 |
| MSTRG.13244.3  | 1981  | coding    | PF03133 |
| MSTRG.13261.4  | 7130  | coding    | PF00788 |
| MSTRG.13261.5  | 7133  | coding    | PF00788 |
| MSTRG.13261.6  | 7130  | coding    | PF00788 |
| MSTRG.13261.7  | 7136  | coding    | PF00788 |
| MSTRG.13261.1  | 7531  | coding    | PF00788 |
| MSTRG.13261.8  | 7112  | coding    | PF00788 |
| MSTRG.13261.9  | 6726  | coding    | PF00788 |
| MSTRG.13261.10 | 7698  | coding    | PF00788 |
| MSTRG.13261.11 | 6637  | coding    | PF00788 |
| MSTRG.13261.12 | 6559  | coding    | PF00788 |
| MSTRG.13261.13 | 7415  | coding    | PF00788 |
| MSTRG.13261.14 | 7488  | coding    | PF00788 |
| MSTRG.13263.1  | 1416  | noncoding | —       |
| MSTRG.13266.1  | 948   | noncoding | —       |
| MSTRG.13267.1  | 5126  | noncoding | —       |
| MSTRG.13267.2  | 1251  | noncoding | —       |
| MSTRG.13267.3  | 804   | noncoding | —       |
| MSTRG.13267.4  | 940   | noncoding | —       |
| MSTRG.13254.2  | 916   | noncoding | —       |
| MSTRG.13254.1  | 466   | noncoding | —       |
| MSTRG.13253.3  | 2497  | coding    | PF00086 |
| MSTRG.13253.4  | 2687  | coding    | PF00086 |
| MSTRG.13259.2  | 3093  | coding    | PF05735 |

|                |       |           |         |
|----------------|-------|-----------|---------|
| MSTRG.13260.1  | 3742  | coding    | PF05735 |
| MSTRG.13268.1  | 2438  | noncoding | —       |
| MSTRG.13268.2  | 2695  | noncoding | —       |
| MSTRG.13268.3  | 1339  | noncoding | —       |
| MSTRG.13268.4  | 7702  | noncoding | —       |
| MSTRG.13268.5  | 964   | noncoding | —       |
| MSTRG.13269.1  | 1957  | noncoding | —       |
| MSTRG.13268.8  | 3986  | noncoding | —       |
| MSTRG.13270.1  | 2279  | noncoding | —       |
| MSTRG.13273.4  | 1855  | noncoding | —       |
| MSTRG.13281.1  | 2797  | noncoding | —       |
| MSTRG.13281.2  | 271   | noncoding | —       |
| MSTRG.13282.2  | 231   | noncoding | —       |
| MSTRG.13284.8  | 4839  | coding    | PF13910 |
| MSTRG.13284.6  | 2024  | coding    | PF13910 |
| MSTRG.13284.9  | 4048  | noncoding | —       |
| MSTRG.13284.10 | 1895  | noncoding | —       |
| MSTRG.13277.1  | 901   | noncoding | —       |
| MSTRG.13277.2  | 996   | noncoding | —       |
| MSTRG.13286.3  | 3792  | noncoding | —       |
| MSTRG.13287.1  | 1077  | noncoding | —       |
| MSTRG.13303.1  | 554   | noncoding | —       |
| MSTRG.13305.1  | 243   | noncoding | —       |
| MSTRG.13314.1  | 15639 | coding    | PF05026 |
| MSTRG.13314.3  | 7923  | noncoding | —       |
| MSTRG.13314.2  | 6102  | noncoding | —       |
| MSTRG.13323.1  | 2411  | noncoding | —       |
| MSTRG.13323.2  | 1901  | noncoding | —       |
| MSTRG.13320.3  | 3889  | coding    | PF09380 |
| MSTRG.13320.4  | 9217  | noncoding | —       |
| MSTRG.13320.5  | 3430  | coding    | PF09380 |
| MSTRG.13320.6  | 14926 | noncoding | —       |
| MSTRG.13320.7  | 1748  | coding    | PF00373 |
| MSTRG.13320.9  | 2673  | noncoding | —       |
| MSTRG.13324.1  | 14321 | noncoding | —       |
| MSTRG.13325.1  | 2589  | noncoding | —       |
| MSTRG.13327.1  | 4484  | noncoding | —       |
| MSTRG.13329.1  | 2182  | noncoding | —       |
| MSTRG.13331.1  | 965   | noncoding | —       |
| MSTRG.13332.1  | 1041  | noncoding | —       |
| MSTRG.13332.2  | 977   | noncoding | —       |
| MSTRG.13332.3  | 2329  | noncoding | —       |
| MSTRG.13334.1  | 848   | coding    | PF11092 |
| MSTRG.13334.4  | 2209  | coding    | PF11092 |
| MSTRG.13318.1  | 2326  | noncoding | —       |
| MSTRG.13345.1  | 2559  | noncoding | —       |
| MSTRG.13356.1  | 3997  | coding    | PF12796 |
| MSTRG.13357.1  | 3200  | noncoding | —       |
| MSTRG.13356.3  | 4237  | coding    | PF12796 |
| MSTRG.13356.4  | 3824  | coding    | PF12796 |
| MSTRG.13356.5  | 9374  | coding    | PF12796 |
| MSTRG.13364.2  | 4031  | coding    | PF05995 |
| MSTRG.13365.1  | 310   | noncoding | —       |
| MSTRG.13366.3  | 3279  | noncoding | —       |

|                |       |           |         |
|----------------|-------|-----------|---------|
| MSTRG.13367.1  | 440   | noncoding | -       |
| MSTRG.13367.2  | 426   | noncoding | -       |
| MSTRG.13369.2  | 1561  | coding    | PF14949 |
| MSTRG.13369.4  | 1354  | coding    | PF14949 |
| MSTRG.13369.3  | 1573  | coding    | PF14949 |
| MSTRG.13378.1  | 1772  | noncoding | -       |
| MSTRG.13378.2  | 1099  | noncoding | -       |
| MSTRG.13381.2  | 970   | noncoding | -       |
| MSTRG.13389.1  | 5551  | coding    | PF15409 |
| MSTRG.13391.6  | 2218  | noncoding | -       |
| MSTRG.13391.3  | 2607  | noncoding | -       |
| MSTRG.13396.1  | 3253  | noncoding | -       |
| MSTRG.13397.1  | 16732 | noncoding | -       |
| MSTRG.13398.1  | 6856  | noncoding | -       |
| MSTRG.13401.1  | 5315  | noncoding | -       |
| MSTRG.13409.2  | 5574  | coding    | PF00616 |
| MSTRG.13410.1  | 2171  | noncoding | -       |
| MSTRG.13410.2  | 1976  | noncoding | -       |
| MSTRG.13409.3  | 6065  | coding    | PF00616 |
| MSTRG.13409.4  | 4917  | coding    | PF00616 |
| MSTRG.13409.5  | 4646  | coding    | PF00616 |
| MSTRG.13409.8  | 4745  | coding    | PF00616 |
| MSTRG.13409.6  | 4876  | coding    | PF00616 |
| MSTRG.13409.7  | 4794  | coding    | PF00616 |
| MSTRG.13409.9  | 4663  | coding    | PF00616 |
| MSTRG.13411.1  | 5880  | noncoding | -       |
| MSTRG.13411.4  | 2341  | noncoding | -       |
| MSTRG.13423.1  | 236   | noncoding | -       |
| MSTRG.13425.1  | 19056 | noncoding | -       |
| MSTRG.13427.1  | 9357  | noncoding | -       |
| MSTRG.13427.2  | 2109  | noncoding | -       |
| MSTRG.13427.4  | 2215  | noncoding | -       |
| MSTRG.13427.3  | 2190  | noncoding | -       |
| MSTRG.13427.6  | 1710  | noncoding | -       |
| MSTRG.13427.8  | 2364  | noncoding | -       |
| MSTRG.13427.9  | 1410  | noncoding | -       |
| MSTRG.13427.10 | 1375  | noncoding | -       |
| MSTRG.13427.11 | 514   | noncoding | -       |
| MSTRG.13428.1  | 13897 | noncoding | -       |
| MSTRG.13428.2  | 7330  | noncoding | -       |
| MSTRG.13429.1  | 15878 | noncoding | -       |
| MSTRG.13430.1  | 2562  | noncoding | -       |
| MSTRG.13431.1  | 13439 | coding    | PF00078 |
| MSTRG.13431.2  | 2707  | noncoding | -       |
| MSTRG.13432.1  | 8932  | noncoding | -       |
| MSTRG.13413.2  | 815   | noncoding | -       |
| MSTRG.13414.1  | 2412  | noncoding | -       |
| MSTRG.13418.1  | 2165  | noncoding | -       |
| MSTRG.13420.1  | 3499  | coding    | PF04144 |
| MSTRG.13421.2  | 4973  | coding    | PF10242 |
| MSTRG.13419.1  | 456   | noncoding | -       |
| MSTRG.13419.2  | 610   | noncoding | -       |
| MSTRG.13419.3  | 536   | noncoding | -       |
| MSTRG.13433.1  | 624   | noncoding | -       |



|               |       |           |         |
|---------------|-------|-----------|---------|
| MSTRG.13437.2 | 1836  | noncoding | -       |
| MSTRG.13440.1 | 2267  | noncoding | -       |
| MSTRG.13449.1 | 1500  | noncoding | -       |
| MSTRG.13450.3 | 4178  | coding    | PF15871 |
| MSTRG.13450.2 | 8418  | coding    | PF15871 |
| MSTRG.13451.1 | 4089  | noncoding | -       |
| MSTRG.13454.2 | 1270  | coding    | PF00568 |
| MSTRG.13456.1 | 5479  | noncoding | -       |
| MSTRG.13456.2 | 7857  | noncoding | -       |
| MSTRG.13457.1 | 5339  | noncoding | -       |
| MSTRG.13459.1 | 233   | noncoding | -       |
| MSTRG.13461.6 | 1342  | noncoding | -       |
| MSTRG.13461.5 | 3032  | coding    | PF03828 |
| MSTRG.13462.1 | 593   | noncoding | -       |
| MSTRG.13481.1 | 315   | noncoding | -       |
| MSTRG.13486.2 | 2853  | coding    | PF00071 |
| MSTRG.13492.1 | 1622  | noncoding | -       |
| MSTRG.13506.1 | 689   | noncoding | -       |
| MSTRG.13506.2 | 2372  | noncoding | -       |
| MSTRG.13506.3 | 2147  | noncoding | -       |
| MSTRG.13506.4 | 1808  | noncoding | -       |
| MSTRG.13510.1 | 8978  | coding    | PF02141 |
| MSTRG.13510.2 | 6152  | coding    | PF02141 |
| MSTRG.13510.3 | 5873  | coding    | PF02141 |
| MSTRG.13510.4 | 6337  | coding    | PF02141 |
| MSTRG.13510.5 | 5935  | coding    | PF02141 |
| MSTRG.13510.6 | 6125  | coding    | PF02141 |
| MSTRG.13497.2 | 4025  | coding    | PF00773 |
| MSTRG.13504.1 | 509   | noncoding | -       |
| MSTRG.13512.4 | 2063  | coding    | PF09817 |
| MSTRG.13512.6 | 2083  | coding    | PF09817 |
| MSTRG.13512.3 | 2311  | coding    | PF09817 |
| MSTRG.13512.7 | 1993  | coding    | PF09817 |
| MSTRG.13512.8 | 2111  | coding    | PF09817 |
| MSTRG.13512.9 | 2333  | coding    | PF09817 |
| MSTRG.13518.1 | 6002  | coding    | PF03166 |
| MSTRG.13518.3 | 4004  | coding    | PF03166 |
| MSTRG.13519.1 | 3161  | noncoding | -       |
| MSTRG.13520.4 | 2567  | noncoding | -       |
| MSTRG.13531.1 | 2193  | noncoding | -       |
| MSTRG.13532.1 | 2267  | coding    | PF14324 |
| MSTRG.13532.3 | 1171  | noncoding | -       |
| MSTRG.13532.6 | 2342  | coding    | PF14324 |
| MSTRG.13538.2 | 3369  | coding    | PF08953 |
| MSTRG.13540.4 | 1091  | noncoding | -       |
| MSTRG.13543.1 | 1152  | coding    | PF15754 |
| MSTRG.13554.1 | 11100 | noncoding | -       |
| MSTRG.13555.1 | 1242  | coding    | PF02994 |
| MSTRG.13560.2 | 1004  | coding    | PF03006 |
| MSTRG.13560.3 | 1240  | coding    | PF03006 |
| MSTRG.13562.1 | 534   | noncoding | -       |
| MSTRG.13564.1 | 4119  | coding    | PF03920 |
| MSTRG.13564.2 | 5158  | coding    | PF03920 |
| MSTRG.13563.1 | 1750  | noncoding | -       |

|                |       |           |         |
|----------------|-------|-----------|---------|
| MSTRG.13563.2  | 1304  | noncoding | -       |
| MSTRG.13566.3  | 4799  | coding    | PF12796 |
| MSTRG.13568.5  | 2777  | noncoding | -       |
| MSTRG.13568.6  | 1893  | noncoding | -       |
| MSTRG.13570.1  | 8162  | coding    | PF05986 |
| MSTRG.13578.1  | 13202 | coding    | PF00063 |
| MSTRG.13578.4  | 6728  | coding    | PF00620 |
| MSTRG.13578.2  | 12801 | coding    | PF00063 |
| MSTRG.13578.3  | 13071 | coding    | PF00063 |
| MSTRG.13578.6  | 12951 | coding    | PF00063 |
| MSTRG.13578.7  | 13074 | coding    | PF00063 |
| MSTRG.13578.8  | 12821 | coding    | PF00063 |
| MSTRG.13578.9  | 12980 | coding    | PF00063 |
| MSTRG.13578.10 | 13508 | coding    | PF00620 |
| MSTRG.13578.11 | 11930 | coding    | PF00620 |
| MSTRG.13579.1  | 2688  | noncoding | -       |
| MSTRG.13580.1  | 577   | noncoding | -       |
| MSTRG.13580.2  | 391   | noncoding | -       |
| MSTRG.13578.12 | 3768  | coding    | PF00063 |
| MSTRG.13578.13 | 6119  | coding    | PF00063 |
| MSTRG.13578.14 | 9513  | coding    | PF00063 |
| MSTRG.13578.15 | 3758  | coding    | PF00063 |
| MSTRG.13578.16 | 4320  | coding    | PF00063 |
| MSTRG.13581.1  | 398   | noncoding | -       |
| MSTRG.13583.1  | 4186  | noncoding | -       |
| MSTRG.13584.2  | 1192  | noncoding | -       |
| MSTRG.13572.3  | 2468  | coding    | PF00224 |
| MSTRG.13573.4  | 2347  | noncoding | -       |
| MSTRG.13573.5  | 2287  | noncoding | -       |
| MSTRG.13573.3  | 2747  | noncoding | -       |
| MSTRG.13573.7  | 2593  | noncoding | -       |
| MSTRG.13573.1  | 2820  | noncoding | -       |
| MSTRG.13575.2  | 3081  | coding    | PF00076 |
| MSTRG.13576.4  | 2187  | coding    | PF00728 |
| MSTRG.13576.3  | 1957  | coding    | PF00728 |
| MSTRG.13576.5  | 1855  | coding    | PF00728 |
| MSTRG.13576.6  | 1946  | coding    | PF00728 |
| MSTRG.13576.7  | 2110  | coding    | PF00728 |
| MSTRG.13576.8  | 1864  | coding    | PF00728 |
| MSTRG.13576.9  | 1711  | coding    | PF00728 |
| MSTRG.13577.2  | 650   | noncoding | -       |
| MSTRG.13577.1  | 934   | noncoding | -       |
| MSTRG.13577.5  | 900   | noncoding | -       |
| MSTRG.13577.9  | 502   | noncoding | -       |
| MSTRG.13577.10 | 867   | noncoding | -       |
| MSTRG.13577.11 | 904   | noncoding | -       |
| MSTRG.13577.6  | 714   | noncoding | -       |
| MSTRG.13577.7  | 729   | noncoding | -       |
| MSTRG.13577.8  | 786   | noncoding | -       |
| MSTRG.13577.12 | 673   | noncoding | -       |
| MSTRG.13589.3  | 4795  | coding    | PF01485 |
| MSTRG.13589.4  | 890   | noncoding | -       |
| MSTRG.13589.7  | 2452  | coding    | PF01485 |
| MSTRG.13589.6  | 10320 | coding    | PF01485 |

|                |      |           |         |
|----------------|------|-----------|---------|
| MSTRG.13591.1  | 1840 | noncoding | -       |
| MSTRG.13593.5  | 2425 | noncoding | -       |
| MSTRG.13593.6  | 2912 | noncoding | -       |
| MSTRG.13593.7  | 2516 | noncoding | -       |
| MSTRG.13594.1  | 3405 | noncoding | -       |
| MSTRG.13593.8  | 4500 | noncoding | -       |
| MSTRG.13595.2  | 2175 | coding    | PF04587 |
| MSTRG.13595.1  | 2231 | coding    | PF04587 |
| MSTRG.13596.1  | 1064 | noncoding | -       |
| MSTRG.13597.1  | 1326 | noncoding | -       |
| MSTRG.13586.1  | 7327 | coding    | PF06583 |
| MSTRG.13586.2  | 5258 | coding    | PF06583 |
| MSTRG.13586.3  | 7014 | coding    | PF06583 |
| MSTRG.13587.1  | 2988 | noncoding | -       |
| MSTRG.13598.2  | 1872 | coding    | PF15165 |
| MSTRG.13599.1  | 3702 | coding    | PF15165 |
| MSTRG.13599.2  | 1420 | coding    | PF07679 |
| MSTRG.13599.3  | 1693 | coding    | PF07679 |
| MSTRG.13599.4  | 1778 | noncoding | -       |
| MSTRG.13602.1  | 2754 | noncoding | -       |
| MSTRG.13602.3  | 2549 | noncoding | -       |
| MSTRG.13602.5  | 2552 | noncoding | -       |
| MSTRG.13600.1  | 2628 | noncoding | -       |
| MSTRG.13603.1  | 414  | noncoding | -       |
| MSTRG.13603.2  | 824  | noncoding | -       |
| MSTRG.13608.3  | 4939 | coding    | PF11977 |
| MSTRG.13608.2  | 3797 | coding    | PF11977 |
| MSTRG.13608.6  | 2332 | coding    | PF11977 |
| MSTRG.13608.5  | 2405 | coding    | PF11977 |
| MSTRG.13605.1  | 3198 | noncoding | -       |
| MSTRG.13612.2  | 807  | coding    | PF00106 |
| MSTRG.13614.2  | 2257 | coding    | PF00868 |
| MSTRG.13618.3  | 1428 | coding    | PF12689 |
| MSTRG.13618.1  | 3203 | coding    | PF12689 |
| MSTRG.13618.2  | 3793 | coding    | PF12689 |
| MSTRG.13627.2  | 5816 | coding    | PF16678 |
| MSTRG.13627.3  | 4930 | coding    | PF16678 |
| MSTRG.13630.1  | 1526 | coding    | PF07002 |
| MSTRG.13637.2  | 3378 | noncoding | -       |
| MSTRG.13657.4  | 3515 | coding    | PF00452 |
| MSTRG.13658.8  | 2719 | coding    | PF11569 |
| MSTRG.13666.4  | 1250 | coding    | PF14969 |
| MSTRG.13666.3  | 1414 | coding    | PF14969 |
| MSTRG.13666.5  | 1186 | coding    | PF14969 |
| MSTRG.13666.2  | 1450 | coding    | PF14969 |
| MSTRG.13667.1  | 4591 | noncoding | -       |
| MSTRG.13667.5  | 6670 | noncoding | -       |
| MSTRG.13667.6  | 4370 | noncoding | -       |
| MSTRG.13667.13 | 6776 | noncoding | -       |
| MSTRG.13667.12 | 5518 | noncoding | -       |
| MSTRG.13652.1  | 2000 | coding    | PF00227 |
| MSTRG.13652.2  | 1752 | coding    | PF00227 |
| MSTRG.13652.3  | 426  | noncoding | -       |
| MSTRG.13653.2  | 1263 | coding    | PF00227 |

|                |       |           |         |
|----------------|-------|-----------|---------|
| MSTRG.13653.3  | 967   | coding    | PF00227 |
| MSTRG.13669.2  | 2260  | coding    | PF15394 |
| MSTRG.13671.1  | 1515  | noncoding | —       |
| MSTRG.13672.6  | 1711  | coding    | PF14735 |
| MSTRG.13672.5  | 1771  | coding    | PF14735 |
| MSTRG.13672.4  | 1592  | coding    | PF14735 |
| MSTRG.13682.1  | 932   | noncoding | —       |
| MSTRG.13684.1  | 334   | noncoding | —       |
| MSTRG.13687.2  | 387   | noncoding | —       |
| MSTRG.13690.1  | 1717  | coding    | PF09291 |
| MSTRG.13690.2  | 1900  | coding    | PF09291 |
| MSTRG.13690.5  | 1380  | coding    | PF09291 |
| MSTRG.13690.3  | 1394  | coding    | PF09291 |
| MSTRG.13690.4  | 1353  | coding    | PF09291 |
| MSTRG.13711.1  | 13519 | coding    | PF00176 |
| MSTRG.13711.2  | 7460  | coding    | PF00176 |
| MSTRG.13711.3  | 13601 | coding    | PF00176 |
| MSTRG.13711.4  | 8387  | coding    | PF00176 |
| MSTRG.13711.5  | 13491 | coding    | PF00176 |
| MSTRG.13711.6  | 7295  | coding    | PF00176 |
| MSTRG.13713.1  | 1930  | noncoding | —       |
| MSTRG.13713.3  | 1960  | noncoding | —       |
| MSTRG.13713.2  | 2137  | noncoding | —       |
| MSTRG.13706.1  | 1926  | noncoding | —       |
| MSTRG.13706.18 | 1643  | noncoding | —       |
| MSTRG.13706.20 | 2156  | noncoding | —       |
| MSTRG.13706.17 | 1918  | noncoding | —       |
| MSTRG.13709.1  | 5719  | noncoding | —       |
| MSTRG.13706.22 | 8201  | noncoding | —       |
| MSTRG.13727.1  | 4278  | coding    | PF03096 |
| MSTRG.13727.2  | 2497  | coding    | PF03096 |
| MSTRG.13727.3  | 2105  | coding    | PF03096 |
| MSTRG.13727.4  | 2107  | coding    | PF03096 |
| MSTRG.13725.4  | 14520 | coding    | PF09243 |
| MSTRG.13725.6  | 3769  | noncoding | —       |
| MSTRG.13725.7  | 7428  | coding    | PF09243 |
| MSTRG.13725.10 | 2491  | noncoding | —       |
| MSTRG.13725.12 | 2084  | coding    | PF09243 |
| MSTRG.13725.13 | 2052  | coding    | PF09243 |
| MSTRG.13729.1  | 579   | noncoding | —       |
| MSTRG.13714.3  | 822   | coding    | PF00074 |
| MSTRG.13717.1  | 427   | noncoding | —       |
| MSTRG.13723.1  | 14612 | coding    | PF01048 |
| MSTRG.13738.1  | 1309  | coding    | PF13853 |
| MSTRG.13746.1  | 680   | noncoding | —       |
| MSTRG.13746.2  | 431   | noncoding | —       |
| MSTRG.13755.2  | 472   | noncoding | —       |
| MSTRG.13755.1  | 10666 | noncoding | —       |
| MSTRG.13755.3  | 7685  | noncoding | —       |
| MSTRG.13755.5  | 4895  | noncoding | —       |
| MSTRG.13755.6  | 5957  | noncoding | —       |
| MSTRG.13756.1  | 8521  | noncoding | —       |
| MSTRG.13758.2  | 4123  | coding    | PF13925 |
| MSTRG.13758.3  | 12094 | coding    | PF03184 |

|               |       |           |         |
|---------------|-------|-----------|---------|
| MSTRG.13758.4 | 2268  | noncoding | -       |
| MSTRG.13750.1 | 349   | noncoding | -       |
| MSTRG.13760.1 | 3236  | noncoding | -       |
| MSTRG.13760.2 | 2170  | noncoding | -       |
| MSTRG.13759.2 | 1190  | noncoding | -       |
| MSTRG.13761.2 | 8413  | coding    | PF06459 |
| MSTRG.13767.1 | 2323  | noncoding | -       |
| MSTRG.13768.4 | 6001  | coding    | PF02181 |
| MSTRG.13768.3 | 6243  | coding    | PF02181 |
| MSTRG.13768.2 | 6228  | coding    | PF02181 |
| MSTRG.13768.5 | 2957  | noncoding | -       |
| MSTRG.13769.1 | 1719  | noncoding | -       |
| MSTRG.13768.7 | 3006  | coding    | PF02181 |
| MSTRG.13765.1 | 3803  | coding    | PF00620 |
| MSTRG.13765.2 | 3416  | coding    | PF00620 |
| MSTRG.13764.1 | 1380  | coding    | PF00022 |
| MSTRG.13780.2 | 1546  | coding    | PF01902 |
| MSTRG.13782.1 | 5994  | noncoding | -       |
| MSTRG.13780.3 | 5589  | noncoding | -       |
| MSTRG.13783.1 | 843   | noncoding | -       |
| MSTRG.13784.1 | 3620  | noncoding | -       |
| MSTRG.13808.1 | 9578  | coding    | PF14811 |
| MSTRG.13808.3 | 1873  | coding    | PF14811 |
| MSTRG.13808.4 | 1479  | coding    | PF14811 |
| MSTRG.13808.2 | 5053  | coding    | PF14811 |
| MSTRG.13808.5 | 30793 | coding    | PF14811 |
| MSTRG.13809.1 | 3023  | noncoding | -       |
| MSTRG.13811.1 | 1608  | noncoding | -       |
| MSTRG.13819.3 | 1350  | coding    | PF14992 |
| MSTRG.13820.1 | 633   | noncoding | -       |
| MSTRG.13813.1 | 437   | noncoding | -       |
| MSTRG.13822.1 | 1996  | noncoding | -       |
| MSTRG.13829.1 | 244   | noncoding | -       |
| MSTRG.13831.2 | 1564  | noncoding | -       |
| MSTRG.13831.3 | 3820  | coding    | PF15554 |
| MSTRG.13832.1 | 1141  | noncoding | -       |
| MSTRG.13831.4 | 2074  | coding    | PF15554 |
| MSTRG.13836.1 | 3442  | noncoding | -       |
| MSTRG.13837.1 | 6296  | noncoding | -       |
| MSTRG.13838.5 | 3930  | coding    | PF00069 |
| MSTRG.13838.6 | 4526  | noncoding | -       |
| MSTRG.13834.2 | 3766  | coding    | PF08311 |
| MSTRG.13844.2 | 17341 | coding    | PF01426 |
| MSTRG.13844.4 | 4332  | coding    | PF01426 |
| MSTRG.13845.1 | 2037  | coding    | PF14989 |
| MSTRG.13846.1 | 1704  | coding    | PF00849 |
| MSTRG.13846.2 | 1684  | coding    | PF00849 |
| MSTRG.13854.3 | 2126  | noncoding | -       |
| MSTRG.13849.2 | 1795  | noncoding | -       |
| MSTRG.13858.2 | 6679  | coding    | PF00176 |
| MSTRG.13859.1 | 2133  | noncoding | -       |
| MSTRG.13862.3 | 7126  | noncoding | -       |
| MSTRG.13862.2 | 4567  | noncoding | -       |
| MSTRG.13862.4 | 2203  | coding    | PF01612 |

|                |       |           |         |
|----------------|-------|-----------|---------|
| MSTRG.13862.5  | 1135  | noncoding | -       |
| MSTRG.13867.1  | 2965  | coding    | PF16006 |
| MSTRG.13870.4  | 3872  | coding    | PF08620 |
| MSTRG.13871.3  | 4186  | coding    | PF07714 |
| MSTRG.13871.4  | 3679  | coding    | PF07714 |
| MSTRG.13877.3  | 11597 | coding    | PF00907 |
| MSTRG.13877.4  | 11450 | coding    | PF00907 |
| MSTRG.13877.5  | 11446 | coding    | PF00907 |
| MSTRG.13884.4  | 6890  | noncoding | -       |
| MSTRG.13884.6  | 7299  | noncoding | -       |
| MSTRG.13884.5  | 7321  | noncoding | -       |
| MSTRG.13884.7  | 7317  | noncoding | -       |
| MSTRG.13884.8  | 5865  | noncoding | -       |
| MSTRG.13885.2  | 1285  | coding    | PF13621 |
| MSTRG.13885.3  | 1238  | coding    | PF13621 |
| MSTRG.13882.1  | 4432  | noncoding | -       |
| MSTRG.13881.1  | 2323  | noncoding | -       |
| MSTRG.13886.2  | 4768  | coding    | PF10366 |
| MSTRG.13886.5  | 1860  | coding    | PF10366 |
| MSTRG.13888.1  | 827   | noncoding | -       |
| MSTRG.13900.1  | 420   | coding    | PF01067 |
| MSTRG.13902.1  | 1100  | noncoding | -       |
| MSTRG.13903.3  | 8137  | noncoding | -       |
| MSTRG.13904.1  | 375   | noncoding | -       |
| MSTRG.13908.1  | 17807 | coding    | PF00225 |
| MSTRG.13908.2  | 16660 | noncoding | -       |
| MSTRG.13910.2  | 7793  | coding    | PF15296 |
| MSTRG.13910.5  | 6489  | noncoding | -       |
| MSTRG.13910.6  | 4301  | coding    | PF00069 |
| MSTRG.13913.3  | 5468  | coding    | PF02207 |
| MSTRG.13913.4  | 5779  | noncoding | -       |
| MSTRG.13891.1  | 920   | noncoding | -       |
| MSTRG.13899.1  | 1414  | noncoding | -       |
| MSTRG.13918.2  | 1296  | coding    | PF00935 |
| MSTRG.13918.3  | 558   | coding    | PF00935 |
| MSTRG.13919.2  | 2782  | coding    | PF05060 |
| MSTRG.13919.1  | 4283  | coding    | PF05060 |
| MSTRG.13940.1  | 4225  | noncoding | -       |
| MSTRG.13941.2  | 2032  | noncoding | -       |
| MSTRG.13941.3  | 1812  | noncoding | -       |
| MSTRG.13942.1  | 1157  | noncoding | -       |
| MSTRG.13942.2  | 1709  | noncoding | -       |
| MSTRG.13942.3  | 727   | noncoding | -       |
| MSTRG.13942.4  | 1017  | noncoding | -       |
| MSTRG.13942.5  | 437   | noncoding | -       |
| MSTRG.13942.6  | 514   | noncoding | -       |
| MSTRG.13942.7  | 574   | noncoding | -       |
| MSTRG.13942.10 | 290   | noncoding | -       |
| MSTRG.13942.11 | 564   | noncoding | -       |
| MSTRG.13942.12 | 559   | noncoding | -       |
| MSTRG.13942.8  | 482   | noncoding | -       |
| MSTRG.13942.9  | 571   | noncoding | -       |
| MSTRG.13942.13 | 574   | noncoding | -       |
| MSTRG.13942.17 | 569   | noncoding | -       |

|                  |       |           |         |
|------------------|-------|-----------|---------|
| MSTRG. 13942. 18 | 431   | noncoding | —       |
| MSTRG. 13942. 19 | 453   | noncoding | —       |
| MSTRG. 13942. 20 | 505   | noncoding | —       |
| MSTRG. 13942. 14 | 576   | noncoding | —       |
| MSTRG. 13942. 15 | 310   | noncoding | —       |
| MSTRG. 13942. 16 | 476   | noncoding | —       |
| MSTRG. 13942. 21 | 539   | noncoding | —       |
| MSTRG. 13942. 22 | 541   | noncoding | —       |
| MSTRG. 13942. 25 | 450   | noncoding | —       |
| MSTRG. 13942. 27 | 431   | noncoding | —       |
| MSTRG. 13942. 28 | 506   | noncoding | —       |
| MSTRG. 13942. 29 | 407   | noncoding | —       |
| MSTRG. 13942. 30 | 317   | noncoding | —       |
| MSTRG. 13942. 31 | 517   | noncoding | —       |
| MSTRG. 13942. 23 | 560   | noncoding | —       |
| MSTRG. 13942. 24 | 583   | noncoding | —       |
| MSTRG. 13942. 26 | 540   | noncoding | —       |
| MSTRG. 13942. 32 | 566   | noncoding | —       |
| MSTRG. 13942. 33 | 226   | noncoding | —       |
| MSTRG. 13927. 1  | 4329  | coding    | PF10294 |
| MSTRG. 13928. 2  | 4413  | coding    | PF00617 |
| MSTRG. 13944. 3  | 3163  | noncoding | —       |
| MSTRG. 13945. 1  | 1034  | noncoding | —       |
| MSTRG. 13946. 3  | 2206  | coding    | PF02263 |
| MSTRG. 13929. 2  | 2321  | noncoding | —       |
| MSTRG. 13930. 2  | 3570  | noncoding | —       |
| MSTRG. 13952. 1  | 3172  | noncoding | —       |
| MSTRG. 13952. 2  | 1351  | noncoding | —       |
| MSTRG. 13952. 3  | 1141  | noncoding | —       |
| MSTRG. 13955. 1  | 703   | noncoding | —       |
| MSTRG. 13962. 2  | 842   | noncoding | —       |
| MSTRG. 13964. 1  | 515   | noncoding | —       |
| MSTRG. 13965. 1  | 573   | noncoding | —       |
| MSTRG. 13969. 2  | 941   | noncoding | —       |
| MSTRG. 13971. 1  | 564   | noncoding | —       |
| MSTRG. 13981. 1  | 957   | noncoding | —       |
| MSTRG. 13981. 2  | 1043  | noncoding | —       |
| MSTRG. 13982. 1  | 1761  | coding    | PF02100 |
| MSTRG. 13983. 1  | 2196  | noncoding | —       |
| MSTRG. 13984. 1  | 8561  | noncoding | —       |
| MSTRG. 13984. 3  | 9352  | noncoding | —       |
| MSTRG. 13984. 4  | 5030  | noncoding | —       |
| MSTRG. 13986. 1  | 4276  | noncoding | —       |
| MSTRG. 13980. 2  | 2438  | noncoding | —       |
| MSTRG. 14009. 1  | 15198 | coding    | PF00632 |
| MSTRG. 14009. 2  | 16435 | coding    | PF00632 |
| MSTRG. 14009. 3  | 15522 | coding    | PF00632 |
| MSTRG. 14009. 4  | 15160 | coding    | PF00632 |
| MSTRG. 14010. 7  | 2779  | coding    | PF00443 |
| MSTRG. 14010. 6  | 1679  | coding    | PF00443 |
| MSTRG. 14010. 8  | 1337  | coding    | PF00443 |
| MSTRG. 14010. 9  | 10060 | coding    | PF00443 |
| MSTRG. 13999. 1  | 1012  | noncoding | —       |
| MSTRG. 14003. 1  | 862   | coding    | PF01667 |

|                |       |           |         |
|----------------|-------|-----------|---------|
| MSTRG.14003.4  | 424   | coding    | PF01667 |
| MSTRG.14001.2  | 1870  | coding    | PF00144 |
| MSTRG.14014.1  | 250   | noncoding | —       |
| MSTRG.14034.2  | 3261  | noncoding | —       |
| MSTRG.14035.1  | 3195  | noncoding | —       |
| MSTRG.14036.1  | 24748 | noncoding | —       |
| MSTRG.14037.1  | 4259  | noncoding | —       |
| MSTRG.14036.2  | 13036 | noncoding | —       |
| MSTRG.14038.1  | 2409  | noncoding | —       |
| MSTRG.14038.2  | 6039  | noncoding | —       |
| MSTRG.14039.1  | 24583 | noncoding | —       |
| MSTRG.14039.2  | 14630 | noncoding | —       |
| MSTRG.14041.1  | 29071 | noncoding | —       |
| MSTRG.14034.3  | 5279  | coding    | PF00105 |
| MSTRG.14034.5  | 6592  | noncoding | —       |
| MSTRG.14034.6  | 3602  | coding    | PF00105 |
| MSTRG.14043.1  | 2018  | noncoding | —       |
| MSTRG.14026.1  | 1305  | noncoding | —       |
| MSTRG.14029.2  | 972   | coding    | PF02268 |
| MSTRG.14030.1  | 2576  | noncoding | —       |
| MSTRG.14059.4  | 4551  | coding    | PF15303 |
| MSTRG.14059.3  | 4782  | coding    | PF15303 |
| MSTRG.14059.5  | 3374  | coding    | PF15303 |
| MSTRG.14059.6  | 3345  | coding    | PF15303 |
| MSTRG.14060.2  | 772   | noncoding | —       |
| MSTRG.14063.1  | 1197  | noncoding | —       |
| MSTRG.14066.3  | 3681  | noncoding | —       |
| MSTRG.14047.1  | 954   | noncoding | —       |
| MSTRG.14050.4  | 1466  | noncoding | —       |
| MSTRG.14069.1  | 5119  | coding    | PF15328 |
| MSTRG.14069.2  | 2838  | coding    | PF15328 |
| MSTRG.14075.1  | 3187  | noncoding | —       |
| MSTRG.14075.6  | 3938  | noncoding | —       |
| MSTRG.14076.1  | 1690  | noncoding | —       |
| MSTRG.14077.1  | 7032  | coding    | PF00078 |
| MSTRG.14077.2  | 880   | coding    | PF00078 |
| MSTRG.14079.1  | 4130  | noncoding | —       |
| MSTRG.14079.2  | 1810  | noncoding | —       |
| MSTRG.14081.1  | 1976  | noncoding | —       |
| MSTRG.14082.1  | 847   | noncoding | —       |
| MSTRG.14083.1  | 5587  | noncoding | —       |
| MSTRG.14084.1  | 5103  | coding    | PF00078 |
| MSTRG.14085.1  | 20800 | noncoding | —       |
| MSTRG.14093.10 | 5357  | coding    | PF13836 |
| MSTRG.14093.11 | 4620  | coding    | PF13836 |
| MSTRG.14093.4  | 4843  | coding    | PF13836 |
| MSTRG.14093.5  | 6027  | coding    | PF13836 |
| MSTRG.14093.6  | 4442  | coding    | PF13836 |
| MSTRG.14093.7  | 4479  | coding    | PF13836 |
| MSTRG.14093.9  | 4760  | coding    | PF13836 |
| MSTRG.14093.12 | 8766  | coding    | PF13836 |
| MSTRG.14094.1  | 3934  | noncoding | —       |
| MSTRG.14095.1  | 2474  | noncoding | —       |
| MSTRG.14099.1  | 3720  | noncoding | —       |



|                |       |           |         |
|----------------|-------|-----------|---------|
| MSTRG.14100.2  | 1616  | noncoding | -       |
| MSTRG.14089.2  | 10189 | noncoding | -       |
| MSTRG.14109.1  | 562   | noncoding | -       |
| MSTRG.14115.3  | 5607  | noncoding | -       |
| MSTRG.14126.1  | 241   | noncoding | -       |
| MSTRG.14127.1  | 2463  | noncoding | -       |
| MSTRG.14130.1  | 1699  | noncoding | -       |
| MSTRG.14141.6  | 4597  | coding    | PF13889 |
| MSTRG.14141.9  | 4057  | coding    | PF13889 |
| MSTRG.14141.7  | 5012  | coding    | PF13889 |
| MSTRG.14141.11 | 2697  | noncoding | -       |
| MSTRG.14142.3  | 13047 | coding    | PF00063 |
| MSTRG.14142.4  | 7598  | coding    | PF00063 |
| MSTRG.14143.1  | 431   | noncoding | -       |
| MSTRG.14144.2  | 2289  | noncoding | -       |
| MSTRG.14147.1  | 13995 | coding    | PF00429 |
| MSTRG.14147.2  | 4757  | noncoding | -       |
| MSTRG.14153.2  | 1437  | noncoding | -       |
| MSTRG.14153.3  | 1417  | noncoding | -       |
| MSTRG.14157.1  | 18927 | noncoding | -       |
| MSTRG.14157.2  | 45615 | noncoding | -       |
| MSTRG.14157.4  | 43449 | noncoding | -       |
| MSTRG.14157.3  | 50292 | noncoding | -       |
| MSTRG.14157.5  | 46747 | coding    | PF00078 |
| MSTRG.14167.1  | 1278  | noncoding | -       |
| MSTRG.14172.1  | 286   | noncoding | -       |
| MSTRG.14177.1  | 341   | noncoding | -       |
| MSTRG.14182.3  | 1018  | noncoding | -       |
| MSTRG.14183.4  | 2501  | coding    | PF14922 |
| MSTRG.14183.6  | 2367  | coding    | PF14922 |
| MSTRG.14183.7  | 2493  | coding    | PF14922 |
| MSTRG.14183.5  | 1369  | coding    | PF14922 |
| MSTRG.14183.1  | 2028  | coding    | PF14922 |
| MSTRG.14183.8  | 1968  | coding    | PF14922 |
| MSTRG.14186.2  | 1794  | noncoding | -       |
| MSTRG.14190.2  | 5941  | coding    | PF01248 |
| MSTRG.14191.1  | 828   | noncoding | -       |
| MSTRG.14192.1  | 337   | noncoding | -       |
| MSTRG.14193.1  | 3897  | coding    | PF00640 |
| MSTRG.14193.2  | 6207  | noncoding | -       |
| MSTRG.14193.3  | 7556  | coding    | PF00640 |
| MSTRG.14194.3  | 1570  | noncoding | -       |
| MSTRG.14194.2  | 1445  | noncoding | -       |
| MSTRG.14189.2  | 5609  | noncoding | -       |
| MSTRG.14189.3  | 5753  | noncoding | -       |
| MSTRG.14198.1  | 12674 | noncoding | -       |
| MSTRG.14198.2  | 5207  | noncoding | -       |
| MSTRG.14198.3  | 6696  | noncoding | -       |
| MSTRG.14198.4  | 2098  | noncoding | -       |
| MSTRG.14198.5  | 3223  | noncoding | -       |
| MSTRG.14199.3  | 478   | coding    | PF00692 |
| MSTRG.14201.4  | 1359  | coding    | PF00076 |
| MSTRG.14201.5  | 1639  | coding    | PF00076 |
| MSTRG.14201.3  | 1752  | coding    | PF00076 |

|                |       |           |         |
|----------------|-------|-----------|---------|
| MSTRG.14201.8  | 1685  | coding    | PF00076 |
| MSTRG.14201.7  | 10677 | coding    | PF00076 |
| MSTRG.14213.1  | 554   | noncoding | —       |
| MSTRG.14219.1  | 3894  | noncoding | —       |
| MSTRG.14220.2  | 6195  | coding    | PF01545 |
| MSTRG.14223.1  | 5656  | noncoding | —       |
| MSTRG.14227.1  | 470   | noncoding | —       |
| MSTRG.14221.1  | 1850  | coding    | PF10204 |
| MSTRG.14221.2  | 1260  | coding    | PF10204 |
| MSTRG.14221.3  | 1615  | coding    | PF10204 |
| MSTRG.14233.2  | 656   | noncoding | —       |
| MSTRG.14233.3  | 629   | noncoding | —       |
| MSTRG.14233.1  | 2196  | noncoding | —       |
| MSTRG.14233.4  | 615   | noncoding | —       |
| MSTRG.14235.1  | 517   | noncoding | —       |
| MSTRG.14251.3  | 1364  | noncoding | —       |
| MSTRG.14251.4  | 9358  | coding    | PF00078 |
| MSTRG.14251.5  | 1834  | noncoding | —       |
| MSTRG.14257.1  | 25364 | noncoding | —       |
| MSTRG.14249.6  | 825   | coding    | PF05706 |
| MSTRG.14249.7  | 841   | coding    | PF05706 |
| MSTRG.14249.5  | 1054  | coding    | PF05706 |
| MSTRG.14249.8  | 873   | coding    | PF05706 |
| MSTRG.14248.2  | 4165  | coding    | PF00241 |
| MSTRG.14266.3  | 3944  | coding    | PF12341 |
| MSTRG.14269.2  | 5223  | coding    | PF15822 |
| MSTRG.14269.4  | 2971  | noncoding | —       |
| MSTRG.14272.2  | 2936  | coding    | PF03359 |
| MSTRG.14277.1  | 2608  | noncoding | —       |
| MSTRG.14278.1  | 3387  | noncoding | —       |
| MSTRG.14287.6  | 4502  | noncoding | —       |
| MSTRG.14287.7  | 4658  | noncoding | —       |
| MSTRG.14287.8  | 4571  | noncoding | —       |
| MSTRG.14287.10 | 4680  | noncoding | —       |
| MSTRG.14287.11 | 5216  | noncoding | —       |
| MSTRG.14287.12 | 4730  | noncoding | —       |
| MSTRG.14287.9  | 4904  | noncoding | —       |
| MSTRG.14287.13 | 5129  | noncoding | —       |
| MSTRG.14288.1  | 2144  | noncoding | —       |
| MSTRG.14287.14 | 2364  | noncoding | —       |
| MSTRG.14280.1  | 1774  | noncoding | —       |
| MSTRG.14281.1  | 1162  | coding    | PF04710 |
| MSTRG.14281.3  | 1064  | coding    | PF04710 |
| MSTRG.14281.4  | 1171  | coding    | PF04710 |
| MSTRG.14281.5  | 3737  | coding    | PF04710 |
| MSTRG.14282.1  | 15650 | noncoding | —       |
| MSTRG.14282.2  | 2515  | noncoding | —       |
| MSTRG.14283.1  | 5451  | noncoding | —       |
| MSTRG.14284.1  | 6317  | noncoding | —       |
| MSTRG.14285.1  | 1923  | noncoding | —       |
| MSTRG.14290.1  | 5307  | noncoding | —       |
| MSTRG.14290.4  | 6505  | noncoding | —       |
| MSTRG.14290.5  | 3039  | noncoding | —       |
| MSTRG.14290.6  | 2304  | noncoding | —       |

|                |       |           |         |
|----------------|-------|-----------|---------|
| MSTRG.14290.3  | 2972  | coding    | PF11028 |
| MSTRG.14290.7  | 3033  | noncoding | —       |
| MSTRG.14291.1  | 364   | noncoding | —       |
| MSTRG.14304.1  | 426   | noncoding | —       |
| MSTRG.14304.2  | 615   | noncoding | —       |
| MSTRG.14308.1  | 3005  | noncoding | —       |
| MSTRG.14295.1  | 4300  | noncoding | —       |
| MSTRG.14296.2  | 3109  | coding    | PF15767 |
| MSTRG.14297.1  | 280   | noncoding | —       |
| MSTRG.14298.1  | 458   | noncoding | —       |
| MSTRG.14310.2  | 2276  | coding    | PF00227 |
| MSTRG.14311.1  | 4007  | noncoding | —       |
| MSTRG.14311.2  | 1084  | noncoding | —       |
| MSTRG.14311.3  | 3777  | noncoding | —       |
| MSTRG.14311.4  | 3601  | noncoding | —       |
| MSTRG.14313.2  | 6880  | noncoding | —       |
| MSTRG.14317.2  | 609   | coding    | PF02064 |
| MSTRG.14318.2  | 3950  | coding    | PF02064 |
| MSTRG.14319.1  | 5317  | coding    | PF15324 |
| MSTRG.14319.2  | 5301  | coding    | PF15324 |
| MSTRG.14319.4  | 4797  | coding    | PF15324 |
| MSTRG.14319.3  | 5310  | coding    | PF15324 |
| MSTRG.14319.12 | 4396  | coding    | PF15324 |
| MSTRG.14319.13 | 2845  | coding    | PF15324 |
| MSTRG.14319.14 | 2068  | coding    | PF15324 |
| MSTRG.14320.1  | 1962  | noncoding | —       |
| MSTRG.14324.1  | 14426 | noncoding | —       |
| MSTRG.14325.1  | 4783  | noncoding | —       |
| MSTRG.14325.2  | 2438  | noncoding | —       |
| MSTRG.14326.1  | 322   | noncoding | —       |
| MSTRG.14330.1  | 1057  | noncoding | —       |
| MSTRG.14331.1  | 5992  | noncoding | —       |
| MSTRG.14331.3  | 4301  | noncoding | —       |
| MSTRG.14334.2  | 2813  | noncoding | —       |
| MSTRG.14349.2  | 2733  | coding    | PF02475 |
| MSTRG.14350.1  | 2845  | noncoding | —       |
| MSTRG.14354.1  | 3991  | noncoding | —       |
| MSTRG.14343.1  | 2574  | coding    | PF03381 |
| MSTRG.14359.2  | 3999  | coding    | PF08778 |
| MSTRG.14360.2  | 1335  | coding    | PF09808 |
| MSTRG.14367.4  | 2031  | coding    | PF01603 |
| MSTRG.14367.5  | 1973  | coding    | PF01603 |
| MSTRG.14368.1  | 802   | noncoding | —       |
| MSTRG.14369.1  | 4955  | noncoding | —       |
| MSTRG.14401.1  | 631   | noncoding | —       |
| MSTRG.14409.7  | 21313 | noncoding | —       |
| MSTRG.14409.8  | 21225 | noncoding | —       |
| MSTRG.14409.9  | 21876 | noncoding | —       |
| MSTRG.14409.10 | 3372  | noncoding | —       |
| MSTRG.14409.11 | 18914 | noncoding | —       |
| MSTRG.14409.12 | 18692 | noncoding | —       |
| MSTRG.14409.13 | 14019 | noncoding | —       |
| MSTRG.14409.14 | 14466 | noncoding | —       |
| MSTRG.14411.3  | 3485  | noncoding | —       |

|               |      |           |         |
|---------------|------|-----------|---------|
| MSTRG.14411.4 | 3497 | noncoding | -       |
| MSTRG.14411.5 | 4047 | noncoding | -       |
| MSTRG.14411.6 | 3502 | noncoding | -       |
| MSTRG.14412.1 | 3088 | coding    | PF01268 |
| MSTRG.14376.1 | 2350 | coding    | PF00651 |
| MSTRG.14376.2 | 6733 | coding    | PF00651 |
| MSTRG.14379.1 | 1308 | noncoding | -       |
| MSTRG.14376.3 | 332  | noncoding | -       |
| MSTRG.14379.2 | 3153 | noncoding | -       |
| MSTRG.14380.1 | 2066 | coding    | PF00012 |
| MSTRG.14380.2 | 1562 | coding    | PF00012 |
| MSTRG.14371.4 | 1222 | coding    | PF14895 |
| MSTRG.14385.1 | 841  | noncoding | -       |
| MSTRG.14386.1 | 207  | noncoding | -       |
| MSTRG.14387.1 | 490  | noncoding | -       |
| MSTRG.14395.1 | 4927 | noncoding | -       |
| MSTRG.14398.1 | 2245 | coding    | PF00078 |
| MSTRG.14399.1 | 3945 | noncoding | -       |
| MSTRG.14419.1 | 5369 | noncoding | -       |
| MSTRG.14421.1 | 854  | noncoding | -       |
| MSTRG.14422.1 | 1271 | noncoding | -       |
| MSTRG.14424.1 | 677  | noncoding | -       |
| MSTRG.14424.2 | 920  | noncoding | -       |
| MSTRG.14426.2 | 826  | noncoding | -       |
| MSTRG.14426.3 | 1217 | noncoding | -       |
| MSTRG.14427.3 | 5468 | coding    | PF00625 |
| MSTRG.14427.4 | 5179 | coding    | PF00625 |
| MSTRG.14428.1 | 3854 | noncoding | -       |
| MSTRG.14429.1 | 804  | noncoding | -       |
| MSTRG.14414.1 | 4151 | noncoding | -       |
| MSTRG.14434.1 | 6569 | coding    | PF00784 |
| MSTRG.14435.1 | 1126 | coding    | PF10181 |
| MSTRG.14436.2 | 518  | coding    | PF00832 |
| MSTRG.14437.1 | 1877 | coding    | PF12352 |
| MSTRG.14436.4 | 1611 | coding    | PF00491 |
| MSTRG.14437.5 | 1462 | coding    | PF12352 |
| MSTRG.14439.2 | 2736 | coding    | PF00106 |
| MSTRG.14439.3 | 2280 | coding    | PF00106 |
| MSTRG.14454.3 | 6492 | coding    | PF01363 |
| MSTRG.14455.1 | 3540 | coding    | PF08423 |
| MSTRG.14461.1 | 2012 | noncoding | -       |
| MSTRG.14440.1 | 414  | noncoding | -       |
| MSTRG.14441.2 | 2828 | coding    | PF04553 |
| MSTRG.14442.1 | 3001 | coding    | PF08726 |
| MSTRG.14442.3 | 3075 | coding    | PF08726 |
| MSTRG.14442.4 | 3239 | coding    | PF08726 |
| MSTRG.14442.5 | 3148 | coding    | PF08726 |
| MSTRG.14442.6 | 3282 | coding    | PF08726 |
| MSTRG.14445.2 | 402  | noncoding | -       |
| MSTRG.14445.1 | 894  | noncoding | -       |
| MSTRG.14445.3 | 477  | noncoding | -       |
| MSTRG.14446.1 | 650  | noncoding | -       |
| MSTRG.14447.1 | 4432 | noncoding | -       |
| MSTRG.14448.1 | 5441 | noncoding | -       |

|                  |       |           |         |
|------------------|-------|-----------|---------|
| MSTRG. 14453. 2  | 3957  | coding    | PF00652 |
| MSTRG. 14453. 4  | 3943  | coding    | PF00652 |
| MSTRG. 14453. 5  | 3527  | coding    | PF00652 |
| MSTRG. 14486. 1  | 4917  | coding    | PF02535 |
| MSTRG. 14486. 3  | 4875  | coding    | PF02535 |
| MSTRG. 14486. 4  | 4882  | coding    | PF02535 |
| MSTRG. 14487. 1  | 8511  | noncoding | —       |
| MSTRG. 14487. 2  | 8350  | noncoding | —       |
| MSTRG. 14488. 3  | 9289  | noncoding | —       |
| MSTRG. 14488. 5  | 5074  | noncoding | —       |
| MSTRG. 14491. 3  | 2099  | coding    | PF00078 |
| MSTRG. 14491. 5  | 2617  | coding    | PF00076 |
| MSTRG. 14491. 8  | 2564  | coding    | PF00076 |
| MSTRG. 14491. 7  | 2824  | coding    | PF00076 |
| MSTRG. 14491. 10 | 21114 | coding    | PF00076 |
| MSTRG. 14491. 6  | 7990  | coding    | PF00076 |
| MSTRG. 14491. 4  | 2147  | coding    | PF00078 |
| MSTRG. 14491. 11 | 1186  | coding    | PF00076 |
| MSTRG. 14489. 1  | 1641  | coding    | PF00086 |
| MSTRG. 14489. 3  | 1795  | coding    | PF00086 |
| MSTRG. 14489. 4  | 3136  | coding    | PF00086 |
| MSTRG. 14492. 2  | 4294  | noncoding | —       |
| MSTRG. 14492. 3  | 8824  | noncoding | —       |
| MSTRG. 14492. 4  | 2634  | noncoding | —       |
| MSTRG. 14493. 1  | 6843  | noncoding | —       |
| MSTRG. 14492. 6  | 839   | noncoding | —       |
| MSTRG. 14492. 5  | 9320  | noncoding | —       |
| MSTRG. 14495. 1  | 2648  | coding    | PF01562 |
| MSTRG. 14508. 5  | 4364  | noncoding | —       |
| MSTRG. 14508. 7  | 3758  | noncoding | —       |
| MSTRG. 14508. 8  | 4866  | noncoding | —       |
| MSTRG. 14508. 4  | 6299  | noncoding | —       |
| MSTRG. 14508. 6  | 7922  | coding    | PF05041 |
| MSTRG. 14508. 9  | 3555  | noncoding | —       |
| MSTRG. 14509. 1  | 2599  | noncoding | —       |
| MSTRG. 14508. 10 | 3463  | coding    | PF05041 |
| MSTRG. 14513. 1  | 4460  | noncoding | —       |
| MSTRG. 14512. 3  | 7666  | coding    | PF02145 |
| MSTRG. 14512. 4  | 5992  | coding    | PF02145 |
| MSTRG. 14515. 1  | 4293  | noncoding | —       |
| MSTRG. 14515. 2  | 603   | noncoding | —       |
| MSTRG. 14515. 3  | 2310  | noncoding | —       |
| MSTRG. 14516. 1  | 778   | noncoding | —       |
| MSTRG. 14528. 1  | 9916  | noncoding | —       |
| MSTRG. 14528. 3  | 3182  | noncoding | —       |
| MSTRG. 14528. 5  | 1511  | noncoding | —       |
| MSTRG. 14529. 1  | 12243 | noncoding | —       |
| MSTRG. 14529. 2  | 8271  | noncoding | —       |
| MSTRG. 14530. 1  | 11594 | noncoding | —       |
| MSTRG. 14529. 3  | 8467  | noncoding | —       |
| MSTRG. 14529. 4  | 2712  | noncoding | —       |
| MSTRG. 14529. 5  | 1519  | noncoding | —       |
| MSTRG. 14531. 1  | 20672 | noncoding | —       |
| MSTRG. 14531. 2  | 386   | noncoding | —       |

|                |       |           |         |
|----------------|-------|-----------|---------|
| MSTRG.14533.1  | 2795  | noncoding | -       |
| MSTRG.14534.1  | 58941 | noncoding | -       |
| MSTRG.14534.2  | 11168 | noncoding | -       |
| MSTRG.14534.3  | 2065  | noncoding | -       |
| MSTRG.14534.4  | 5919  | noncoding | -       |
| MSTRG.14533.2  | 4796  | noncoding | -       |
| MSTRG.14535.1  | 390   | noncoding | -       |
| MSTRG.14517.3  | 3035  | coding    | PF14051 |
| MSTRG.14517.4  | 12112 | noncoding | -       |
| MSTRG.14518.1  | 1266  | noncoding | -       |
| MSTRG.14519.1  | 247   | noncoding | -       |
| MSTRG.14526.3  | 3609  | coding    | PF01363 |
| MSTRG.14536.1  | 1459  | noncoding | -       |
| MSTRG.14538.2  | 5968  | noncoding | -       |
| MSTRG.14538.3  | 1144  | noncoding | -       |
| MSTRG.14538.4  | 7428  | noncoding | -       |
| MSTRG.14538.5  | 2350  | noncoding | -       |
| MSTRG.14539.5  | 2979  | coding    | PF01080 |
| MSTRG.14539.7  | 2210  | coding    | PF01080 |
| MSTRG.14540.1  | 3726  | coding    | PF06311 |
| MSTRG.14540.11 | 3412  | coding    | PF06311 |
| MSTRG.14540.9  | 14290 | coding    | PF06311 |
| MSTRG.14540.12 | 3020  | coding    | PF06311 |
| MSTRG.14540.13 | 2960  | coding    | PF06311 |
| MSTRG.14540.10 | 3503  | coding    | PF06311 |
| MSTRG.14540.4  | 3296  | coding    | PF06311 |
| MSTRG.14540.3  | 3005  | coding    | PF06311 |
| MSTRG.14540.6  | 3001  | coding    | PF06311 |
| MSTRG.14540.7  | 5887  | coding    | PF06311 |
| MSTRG.14540.2  | 6268  | coding    | PF06311 |
| MSTRG.14540.8  | 6274  | coding    | PF06311 |
| MSTRG.14540.14 | 6450  | noncoding | -       |
| MSTRG.14541.1  | 1348  | noncoding | -       |
| MSTRG.14543.5  | 3424  | noncoding | -       |
| MSTRG.14544.1  | 2498  | coding    | PF08007 |
| MSTRG.14553.1  | 5934  | coding    | PF14893 |
| MSTRG.14553.2  | 6734  | noncoding | -       |
| MSTRG.14553.3  | 3669  | coding    | PF14893 |
| MSTRG.14558.2  | 2013  | coding    | PF16884 |
| MSTRG.14560.3  | 2474  | noncoding | -       |
| MSTRG.14560.7  | 3460  | noncoding | -       |
| MSTRG.14563.6  | 6278  | coding    | PF01150 |
| MSTRG.14563.4  | 5305  | coding    | PF01150 |
| MSTRG.14563.5  | 5302  | coding    | PF01150 |
| MSTRG.14564.6  | 1803  | noncoding | -       |
| MSTRG.14564.4  | 2885  | coding    | PF14988 |
| MSTRG.14564.5  | 2685  | coding    | PF14988 |
| MSTRG.14564.2  | 2745  | coding    | PF14988 |
| MSTRG.14565.1  | 3277  | coding    | PF00171 |
| MSTRG.14564.7  | 346   | noncoding | -       |
| MSTRG.14564.8  | 3097  | coding    | PF14988 |
| MSTRG.14565.2  | 3297  | coding    | PF00171 |
| MSTRG.14566.4  | 5616  | coding    | PF10044 |
| MSTRG.14567.1  | 12577 | noncoding | -       |

|                |       |           |         |
|----------------|-------|-----------|---------|
| MSTRG.14568.1  | 5680  | noncoding | -       |
| MSTRG.14569.1  | 634   | noncoding | -       |
| MSTRG.14556.2  | 947   | noncoding | -       |
| MSTRG.14557.1  | 6683  | coding    | PF00683 |
| MSTRG.14574.4  | 7166  | coding    | PF00632 |
| MSTRG.14576.2  | 638   | coding    | PF04900 |
| MSTRG.14579.4  | 7209  | noncoding | -       |
| MSTRG.14580.1  | 1937  | coding    | PF00198 |
| MSTRG.14580.3  | 2639  | coding    | PF00198 |
| MSTRG.14570.2  | 1404  | coding    | PF01008 |
| MSTRG.14573.2  | 1102  | noncoding | -       |
| MSTRG.14583.1  | 1611  | noncoding | -       |
| MSTRG.14593.1  | 1682  | noncoding | -       |
| MSTRG.14593.3  | 2643  | noncoding | -       |
| MSTRG.14593.4  | 3804  | noncoding | -       |
| MSTRG.14593.5  | 12577 | noncoding | -       |
| MSTRG.14593.7  | 10330 | noncoding | -       |
| MSTRG.14600.1  | 1908  | coding    | PF03133 |
| MSTRG.14600.8  | 2068  | coding    | PF03133 |
| MSTRG.14600.11 | 4683  | coding    | PF03133 |
| MSTRG.14600.5  | 4842  | coding    | PF03133 |
| MSTRG.14600.6  | 4323  | coding    | PF03133 |
| MSTRG.14600.7  | 4761  | coding    | PF03133 |
| MSTRG.14600.2  | 4892  | coding    | PF03133 |
| MSTRG.14600.3  | 4766  | coding    | PF03133 |
| MSTRG.14600.9  | 4493  | coding    | PF03133 |
| MSTRG.14600.12 | 11975 | noncoding | -       |
| MSTRG.14601.1  | 806   | noncoding | -       |
| MSTRG.14600.13 | 3647  | noncoding | -       |
| MSTRG.14600.14 | 2848  | noncoding | -       |
| MSTRG.14603.2  | 3303  | coding    | PF00019 |
| MSTRG.14605.3  | 2886  | noncoding | -       |
| MSTRG.14605.4  | 4031  | noncoding | -       |
| MSTRG.14605.2  | 1210  | coding    | PF15305 |
| MSTRG.14605.5  | 6920  | coding    | PF15305 |
| MSTRG.14591.4  | 1483  | noncoding | -       |
| MSTRG.14591.5  | 1460  | noncoding | -       |
| MSTRG.14589.1  | 701   | noncoding | -       |
| MSTRG.14590.1  | 411   | noncoding | -       |
| MSTRG.14592.1  | 2061  | coding    | PF00105 |
| MSTRG.14592.2  | 2253  | coding    | PF00105 |
| MSTRG.14608.1  | 8090  | noncoding | -       |
| MSTRG.14608.2  | 7975  | noncoding | -       |
| MSTRG.14608.5  | 4089  | noncoding | -       |
| MSTRG.14608.4  | 5415  | noncoding | -       |
| MSTRG.14610.1  | 2742  | noncoding | -       |
| MSTRG.14608.7  | 5154  | noncoding | -       |
| MSTRG.14612.1  | 1006  | noncoding | -       |
| MSTRG.14615.1  | 7039  | coding    | PF15800 |
| MSTRG.14615.2  | 7361  | coding    | PF15800 |
| MSTRG.14615.3  | 4282  | coding    | PF15800 |
| MSTRG.14615.5  | 5678  | coding    | PF15800 |
| MSTRG.14619.3  | 3196  | coding    | PF02366 |
| MSTRG.14619.2  | 3170  | coding    | PF02366 |

|               |       |           |         |
|---------------|-------|-----------|---------|
| MSTRG.14619.4 | 3202  | coding    | PF02366 |
| MSTRG.14620.1 | 1488  | coding    | PF02798 |
| MSTRG.14620.2 | 1433  | coding    | PF02798 |
| MSTRG.14620.3 | 1762  | coding    | PF02798 |
| MSTRG.14620.4 | 1484  | coding    | PF13417 |
| MSTRG.14620.5 | 993   | noncoding | —       |
| MSTRG.14620.6 | 1055  | coding    | PF02798 |
| MSTRG.14616.3 | 8345  | coding    | PF13897 |
| MSTRG.14624.4 | 2686  | coding    | PF09787 |
| MSTRG.14625.3 | 1536  | coding    | PF09229 |
| MSTRG.14629.1 | 3277  | coding    | PF02731 |
| MSTRG.14629.3 | 2218  | coding    | PF02731 |
| MSTRG.14626.2 | 2039  | coding    | PF03109 |
| MSTRG.14630.1 | 649   | noncoding | —       |
| MSTRG.14633.1 | 975   | noncoding | —       |
| MSTRG.14638.1 | 372   | noncoding | —       |
| MSTRG.14645.1 | 5163  | noncoding | —       |
| MSTRG.14646.1 | 2073  | noncoding | —       |
| MSTRG.14648.2 | 937   | noncoding | —       |
| MSTRG.14648.3 | 2527  | noncoding | —       |
| MSTRG.14651.1 | 2910  | coding    | PF03153 |
| MSTRG.14651.3 | 4399  | coding    | PF03153 |
| MSTRG.14651.4 | 1695  | coding    | PF03153 |
| MSTRG.14647.1 | 284   | noncoding | —       |
| MSTRG.14658.1 | 1916  | noncoding | —       |
| MSTRG.14656.1 | 570   | noncoding | —       |
| MSTRG.14672.1 | 359   | noncoding | —       |
| MSTRG.14673.1 | 364   | noncoding | —       |
| MSTRG.14675.2 | 5357  | coding    | PF04192 |
| MSTRG.14678.1 | 849   | noncoding | —       |
| MSTRG.14686.1 | 633   | noncoding | —       |
| MSTRG.14687.1 | 1037  | noncoding | —       |
| MSTRG.14687.2 | 1342  | noncoding | —       |
| MSTRG.14688.2 | 8266  | noncoding | —       |
| MSTRG.14692.1 | 795   | noncoding | —       |
| MSTRG.14692.2 | 1002  | noncoding | —       |
| MSTRG.14695.1 | 758   | noncoding | —       |
| MSTRG.14696.5 | 6654  | noncoding | —       |
| MSTRG.14696.6 | 5272  | noncoding | —       |
| MSTRG.14697.1 | 1440  | noncoding | —       |
| MSTRG.14699.2 | 19685 | noncoding | —       |
| MSTRG.14699.1 | 30953 | noncoding | —       |
| MSTRG.14699.3 | 27471 | noncoding | —       |
| MSTRG.14699.4 | 34020 | noncoding | —       |
| MSTRG.14699.5 | 32094 | noncoding | —       |
| MSTRG.14699.6 | 19654 | noncoding | —       |
| MSTRG.14701.8 | 1005  | coding    | PF15244 |
| MSTRG.14701.4 | 1911  | coding    | PF15244 |
| MSTRG.14701.5 | 1839  | coding    | PF15244 |
| MSTRG.14701.7 | 2187  | coding    | PF15244 |
| MSTRG.14701.9 | 1494  | coding    | PF15244 |
| MSTRG.14702.1 | 8441  | coding    | PF00102 |
| MSTRG.14703.1 | 5121  | noncoding | —       |
| MSTRG.14707.5 | 2155  | noncoding | —       |



|                |       |           |         |
|----------------|-------|-----------|---------|
| MSTRG.14707.4  | 3013  | noncoding | -       |
| MSTRG.14707.2  | 3144  | noncoding | -       |
| MSTRG.14708.2  | 13168 | coding    | PF03451 |
| MSTRG.14708.6  | 6512  | coding    | PF03451 |
| MSTRG.14708.7  | 3935  | coding    | PF03451 |
| MSTRG.14709.1  | 4068  | noncoding | -       |
| MSTRG.14710.1  | 2482  | noncoding | -       |
| MSTRG.14708.9  | 2459  | coding    | PF03451 |
| MSTRG.14711.1  | 4558  | coding    | PF02994 |
| MSTRG.14708.10 | 2320  | noncoding | -       |
| MSTRG.14704.2  | 2109  | noncoding | -       |
| MSTRG.14704.3  | 1965  | noncoding | -       |
| MSTRG.14704.4  | 2609  | noncoding | -       |
| MSTRG.14706.1  | 1678  | noncoding | -       |
| MSTRG.14715.1  | 7646  | coding    | PF00250 |
| MSTRG.14715.6  | 3021  | coding    | PF00250 |
| MSTRG.14715.7  | 3067  | coding    | PF00250 |
| MSTRG.14715.8  | 3155  | coding    | PF00250 |
| MSTRG.14716.1  | 1780  | noncoding | -       |
| MSTRG.14717.1  | 14685 | noncoding | -       |
| MSTRG.14718.1  | 1487  | noncoding | -       |
| MSTRG.14719.1  | 3967  | noncoding | -       |
| MSTRG.14720.1  | 5785  | noncoding | -       |
| MSTRG.14721.1  | 14929 | noncoding | -       |
| MSTRG.14722.1  | 4408  | noncoding | -       |
| MSTRG.14723.1  | 2156  | noncoding | -       |
| MSTRG.14727.1  | 1874  | noncoding | -       |
| MSTRG.14727.2  | 874   | noncoding | -       |
| MSTRG.14730.1  | 3175  | noncoding | -       |
| MSTRG.14731.2  | 2296  | coding    | PF06087 |
| MSTRG.14734.2  | 1636  | coding    | PF00004 |
| MSTRG.14735.2  | 4541  | coding    | PF08424 |
| MSTRG.14735.3  | 4480  | coding    | PF08424 |
| MSTRG.14736.1  | 2373  | noncoding | -       |
| MSTRG.14745.1  | 4225  | noncoding | -       |
| MSTRG.14746.1  | 2594  | noncoding | -       |
| MSTRG.14748.1  | 1975  | noncoding | -       |
| MSTRG.14749.1  | 2301  | noncoding | -       |
| MSTRG.14751.1  | 3353  | noncoding | -       |
| MSTRG.14750.3  | 1920  | noncoding | -       |
| MSTRG.14750.2  | 2187  | noncoding | -       |
| MSTRG.14750.5  | 1377  | noncoding | -       |
| MSTRG.14750.4  | 1541  | noncoding | -       |
| MSTRG.14750.6  | 1425  | noncoding | -       |
| MSTRG.14753.3  | 6965  | coding    | PF00069 |
| MSTRG.14754.1  | 513   | noncoding | -       |
| MSTRG.14753.4  | 2913  | noncoding | -       |
| MSTRG.14769.4  | 7215  | noncoding | -       |
| MSTRG.14771.1  | 1584  | coding    | PF04321 |
| MSTRG.14772.1  | 2085  | coding    | PF13765 |
| MSTRG.14772.2  | 2176  | coding    | PF13765 |
| MSTRG.14772.4  | 1909  | coding    | PF13765 |
| MSTRG.14773.1  | 4384  | noncoding | -       |
| MSTRG.14773.2  | 6897  | noncoding | -       |

|               |       |           |         |
|---------------|-------|-----------|---------|
| MSTRG.14775.1 | 1412  | noncoding | -       |
| MSTRG.14777.1 | 6492  | coding    | PF01359 |
| MSTRG.14778.1 | 1872  | noncoding | -       |
| MSTRG.14780.2 | 4929  | coding    | PF06814 |
| MSTRG.14780.3 | 4747  | coding    | PF06814 |
| MSTRG.14782.6 | 1653  | noncoding | -       |
| MSTRG.14785.4 | 874   | coding    | PF06773 |
| MSTRG.14785.5 | 873   | coding    | PF06773 |
| MSTRG.14787.1 | 834   | noncoding | -       |
| MSTRG.14789.4 | 3393  | coding    | PF08311 |
| MSTRG.14790.3 | 2175  | coding    | PF00018 |
| MSTRG.14790.4 | 2171  | coding    | PF00018 |
| MSTRG.14791.2 | 545   | noncoding | -       |
| MSTRG.14792.2 | 869   | noncoding | -       |
| MSTRG.14793.2 | 1530  | noncoding | -       |
| MSTRG.14796.1 | 1065  | noncoding | -       |
| MSTRG.14800.1 | 1246  | coding    | PF01557 |
| MSTRG.14801.2 | 3025  | noncoding | -       |
| MSTRG.14808.2 | 3592  | noncoding | -       |
| MSTRG.14808.4 | 3435  | noncoding | -       |
| MSTRG.14818.2 | 5405  | noncoding | -       |
| MSTRG.14818.4 | 4832  | noncoding | -       |
| MSTRG.14819.1 | 6523  | coding    | PF08150 |
| MSTRG.14821.2 | 3639  | noncoding | -       |
| MSTRG.14821.3 | 3575  | noncoding | -       |
| MSTRG.14821.5 | 3293  | noncoding | -       |
| MSTRG.14814.1 | 315   | noncoding | -       |
| MSTRG.14815.3 | 2448  | coding    | PF14816 |
| MSTRG.14827.1 | 824   | noncoding | -       |
| MSTRG.14828.3 | 4539  | coding    | PF15057 |
| MSTRG.14828.4 | 4132  | coding    | PF15057 |
| MSTRG.14828.2 | 4396  | coding    | PF15057 |
| MSTRG.14828.6 | 4907  | coding    | PF15057 |
| MSTRG.14830.5 | 4000  | coding    | PF16526 |
| MSTRG.14835.1 | 2155  | noncoding | -       |
| MSTRG.14835.2 | 7155  | noncoding | -       |
| MSTRG.14834.5 | 2827  | noncoding | -       |
| MSTRG.14840.1 | 9392  | coding    | PF04666 |
| MSTRG.14840.5 | 2196  | coding    | PF04666 |
| MSTRG.14833.7 | 3158  | noncoding | -       |
| MSTRG.14833.3 | 2941  | noncoding | -       |
| MSTRG.14841.1 | 825   | coding    | PF16565 |
| MSTRG.14842.3 | 934   | noncoding | -       |
| MSTRG.14842.2 | 903   | noncoding | -       |
| MSTRG.14842.1 | 1691  | noncoding | -       |
| MSTRG.14842.5 | 876   | noncoding | -       |
| MSTRG.14844.2 | 1834  | noncoding | -       |
| MSTRG.14846.1 | 4440  | coding    | PF16727 |
| MSTRG.14846.3 | 4223  | coding    | PF16727 |
| MSTRG.14849.1 | 9106  | coding    | PF05110 |
| MSTRG.14849.2 | 5082  | coding    | PF05110 |
| MSTRG.14849.3 | 5544  | coding    | PF05110 |
| MSTRG.14852.1 | 13698 | noncoding | -       |
| MSTRG.14852.2 | 5867  | coding    | PF02337 |

|               |       |           |         |
|---------------|-------|-----------|---------|
| MSTRG.14853.1 | 312   | noncoding | -       |
| MSTRG.14852.3 | 1522  | noncoding | -       |
| MSTRG.14854.2 | 1374  | noncoding | -       |
| MSTRG.14854.1 | 1560  | noncoding | -       |
| MSTRG.14854.3 | 3461  | noncoding | -       |
| MSTRG.14854.4 | 3461  | noncoding | -       |
| MSTRG.14854.5 | 2200  | noncoding | -       |
| MSTRG.14855.1 | 12426 | coding    | PF00517 |
| MSTRG.14856.1 | 424   | noncoding | -       |
| MSTRG.14864.1 | 541   | noncoding | -       |
| MSTRG.14866.2 | 2620  | coding    | PF10155 |
| MSTRG.14866.3 | 2530  | coding    | PF10155 |
| MSTRG.14867.5 | 2545  | noncoding | -       |
| MSTRG.14867.6 | 9554  | noncoding | -       |
| MSTRG.14865.2 | 1086  | noncoding | -       |
| MSTRG.14869.2 | 4760  | coding    | PF00069 |
| MSTRG.14869.5 | 4241  | coding    | PF00069 |
| MSTRG.14869.1 | 7323  | coding    | PF00069 |
| MSTRG.14869.3 | 7131  | coding    | PF00069 |
| MSTRG.14868.1 | 1962  | noncoding | -       |
| MSTRG.14871.2 | 1666  | noncoding | -       |
| MSTRG.14871.1 | 1700  | noncoding | -       |
| MSTRG.14871.3 | 992   | noncoding | -       |
| MSTRG.14872.2 | 2112  | noncoding | -       |
| MSTRG.14872.3 | 3364  | coding    | PF16644 |
| MSTRG.14873.2 | 3023  | noncoding | -       |
| MSTRG.14873.3 | 2771  | noncoding | -       |
| MSTRG.14875.1 | 583   | noncoding | -       |
| MSTRG.14883.1 | 1402  | noncoding | -       |
| MSTRG.14884.1 | 3068  | noncoding | -       |
| MSTRG.14885.1 | 632   | noncoding | -       |
| MSTRG.14877.1 | 425   | noncoding | -       |
| MSTRG.14878.1 | 1137  | noncoding | -       |
| MSTRG.14890.2 | 2428  | coding    | PF15323 |
| MSTRG.14892.2 | 535   | noncoding | -       |
| MSTRG.14905.1 | 1752  | noncoding | -       |
| MSTRG.14907.2 | 820   | noncoding | -       |
| MSTRG.14909.2 | 1252  | coding    | PF11669 |
| MSTRG.14909.3 | 1256  | coding    | PF11669 |
| MSTRG.14909.4 | 1766  | noncoding | -       |
| MSTRG.14909.5 | 1174  | noncoding | -       |
| MSTRG.14911.1 | 1356  | coding    | PF15479 |
| MSTRG.14913.2 | 4447  | coding    | PF12455 |
| MSTRG.14913.3 | 4468  | coding    | PF12455 |
| MSTRG.14921.1 | 3288  | coding    | PF00078 |
| MSTRG.14920.2 | 5415  | coding    | PF00955 |
| MSTRG.14914.2 | 1997  | coding    | PF03637 |
| MSTRG.14915.1 | 471   | noncoding | -       |
| MSTRG.14915.3 | 2396  | noncoding | -       |
| MSTRG.14915.4 | 1327  | noncoding | -       |
| MSTRG.14930.4 | 946   | coding    | PF01712 |
| MSTRG.14930.5 | 4714  | coding    | PF01712 |
| MSTRG.14930.6 | 775   | coding    | PF01712 |
| MSTRG.14931.1 | 3457  | noncoding | -       |

|               |       |           |         |
|---------------|-------|-----------|---------|
| MSTRG.14932.1 | 3170  | noncoding | -       |
| MSTRG.14933.1 | 812   | coding    | PF07114 |
| MSTRG.14933.2 | 902   | coding    | PF07114 |
| MSTRG.14939.1 | 591   | noncoding | -       |
| MSTRG.14940.2 | 2279  | coding    | PF15442 |
| MSTRG.14944.1 | 2145  | coding    | PF08617 |
| MSTRG.14945.1 | 11997 | coding    | PF15309 |
| MSTRG.14945.5 | 11551 | coding    | PF15309 |
| MSTRG.14945.6 | 9953  | coding    | PF15309 |
| MSTRG.14946.1 | 1374  | noncoding | -       |
| MSTRG.14947.1 | 3467  | noncoding | -       |
| MSTRG.14945.7 | 16241 | noncoding | -       |
| MSTRG.14948.1 | 2904  | noncoding | -       |
| MSTRG.14945.8 | 7353  | noncoding | -       |
| MSTRG.14945.9 | 7532  | noncoding | -       |
| MSTRG.14942.2 | 1163  | noncoding | -       |
| MSTRG.14942.3 | 1192  | noncoding | -       |
| MSTRG.14942.6 | 1998  | noncoding | -       |
| MSTRG.14942.5 | 1025  | noncoding | -       |
| MSTRG.14942.4 | 4599  | noncoding | -       |
| MSTRG.14958.1 | 948   | noncoding | -       |
| MSTRG.14957.2 | 4368  | coding    | PF04091 |
| MSTRG.14959.1 | 1848  | noncoding | -       |
| MSTRG.14962.2 | 5774  | coding    | PF00067 |
| MSTRG.14960.1 | 336   | noncoding | -       |
| MSTRG.14965.4 | 5831  | coding    | PF16165 |
| MSTRG.14965.3 | 5266  | coding    | PF08150 |
| MSTRG.14965.1 | 6724  | coding    | PF08150 |
| MSTRG.14965.2 | 7551  | coding    | PF08150 |
| MSTRG.14965.5 | 6676  | coding    | PF08150 |
| MSTRG.14966.1 | 8481  | noncoding | -       |
| MSTRG.14968.7 | 10701 | noncoding | -       |
| MSTRG.14968.4 | 4927  | noncoding | -       |
| MSTRG.14968.5 | 4937  | noncoding | -       |
| MSTRG.14968.8 | 6580  | noncoding | -       |
| MSTRG.14969.1 | 1312  | noncoding | -       |
| MSTRG.14970.1 | 506   | noncoding | -       |
| MSTRG.14975.1 | 649   | noncoding | -       |
| MSTRG.14986.2 | 2547  | coding    | PF05811 |
| MSTRG.14986.3 | 2155  | coding    | PF05811 |
| MSTRG.14987.2 | 4611  | coding    | PF02738 |
| MSTRG.14989.1 | 1896  | coding    | PF01875 |
| MSTRG.14989.2 | 1974  | coding    | PF01875 |
| MSTRG.14989.3 | 1837  | coding    | PF01875 |
| MSTRG.14990.1 | 1783  | noncoding | -       |
| MSTRG.14992.2 | 2248  | coding    | PF00004 |
| MSTRG.15000.1 | 674   | noncoding | -       |
| MSTRG.15001.1 | 2500  | noncoding | -       |
| MSTRG.15007.4 | 13518 | coding    | PF12356 |
| MSTRG.15007.5 | 13363 | coding    | PF12356 |
| MSTRG.15007.7 | 3745  | noncoding | -       |
| MSTRG.15007.8 | 9776  | coding    | PF12356 |
| MSTRG.14997.1 | 226   | noncoding | -       |
| MSTRG.14998.1 | 1079  | noncoding | -       |

|               |       |           |         |
|---------------|-------|-----------|---------|
| MSTRG.15017.1 | 1143  | noncoding | -       |
| MSTRG.15018.1 | 4151  | noncoding | -       |
| MSTRG.15021.1 | 13004 | coding    | PF08232 |
| MSTRG.15021.4 | 6044  | coding    | PF08232 |
| MSTRG.15022.1 | 1812  | noncoding | -       |
| MSTRG.15023.4 | 2468  | noncoding | -       |
| MSTRG.15023.5 | 2154  | noncoding | -       |
| MSTRG.15033.1 | 4243  | coding    | PF00069 |
| MSTRG.15033.2 | 4336  | coding    | PF00069 |
| MSTRG.15033.5 | 4086  | coding    | PF00069 |
| MSTRG.15026.1 | 580   | noncoding | -       |
| MSTRG.15028.1 | 1938  | noncoding | -       |
| MSTRG.15038.2 | 669   | noncoding | -       |
| MSTRG.15046.1 | 2180  | coding    | PF13893 |
| MSTRG.15046.4 | 2946  | coding    | PF13893 |
| MSTRG.15046.5 | 2403  | coding    | PF13893 |
| MSTRG.15046.6 | 2551  | coding    | PF13893 |
| MSTRG.15046.7 | 2263  | noncoding | -       |
| MSTRG.15047.1 | 6794  | noncoding | -       |
| MSTRG.15047.2 | 5812  | noncoding | -       |
| MSTRG.15046.9 | 4736  | noncoding | -       |
| MSTRG.15050.6 | 1500  | coding    | PF00076 |
| MSTRG.15050.2 | 1517  | coding    | PF00076 |
| MSTRG.15050.4 | 1175  | coding    | PF00076 |
| MSTRG.15050.7 | 1727  | coding    | PF00076 |
| MSTRG.15051.1 | 2439  | coding    | PF10300 |
| MSTRG.15051.2 | 9590  | coding    | PF10300 |
| MSTRG.15051.3 | 3208  | coding    | PF10300 |
| MSTRG.15051.4 | 3381  | coding    | PF10300 |
| MSTRG.15052.2 | 448   | noncoding | -       |
| MSTRG.15054.1 | 687   | noncoding | -       |
| MSTRG.15043.1 | 1763  | noncoding | -       |
| MSTRG.15039.1 | 274   | noncoding | -       |
| MSTRG.15055.2 | 8891  | coding    | PF00069 |
| MSTRG.15055.4 | 5129  | coding    | PF00069 |
| MSTRG.15055.6 | 4326  | coding    | PF00069 |
| MSTRG.15055.7 | 3679  | coding    | PF00069 |
| MSTRG.15055.8 | 3060  | coding    | PF00069 |
| MSTRG.15057.1 | 635   | noncoding | -       |
| MSTRG.15058.1 | 731   | noncoding | -       |
| MSTRG.15045.1 | 700   | noncoding | -       |
| MSTRG.15068.1 | 237   | noncoding | -       |
| MSTRG.15072.1 | 403   | noncoding | -       |
| MSTRG.15072.2 | 468   | noncoding | -       |
| MSTRG.15080.1 | 3362  | noncoding | -       |
| MSTRG.15083.4 | 3643  | coding    | PF03451 |
| MSTRG.15083.3 | 4264  | coding    | PF03451 |
| MSTRG.15083.5 | 3241  | noncoding | -       |
| MSTRG.15084.1 | 3290  | noncoding | -       |
| MSTRG.15085.1 | 878   | noncoding | -       |
| MSTRG.15090.1 | 2720  | coding    | PF02214 |
| MSTRG.15090.2 | 17513 | coding    | PF02214 |
| MSTRG.15091.1 | 2250  | noncoding | -       |
| MSTRG.15092.1 | 1958  | noncoding | -       |

|                  |       |           |         |
|------------------|-------|-----------|---------|
| MSTRG. 15093. 10 | 4967  | coding    | PF01448 |
| MSTRG. 15093. 9  | 5353  | coding    | PF01448 |
| MSTRG. 15093. 11 | 2192  | coding    | PF01448 |
| MSTRG. 15093. 12 | 1840  | coding    | PF01448 |
| MSTRG. 15097. 3  | 5919  | coding    | PF10350 |
| MSTRG. 15097. 4  | 2115  | noncoding | —       |
| MSTRG. 15100. 2  | 6492  | coding    | PF00784 |
| MSTRG. 15105. 1  | 6746  | coding    | PF00481 |
| MSTRG. 15105. 2  | 3127  | coding    | PF00481 |
| MSTRG. 15105. 5  | 4445  | coding    | PF00481 |
| MSTRG. 15105. 3  | 10841 | coding    | PF00481 |
| MSTRG. 15105. 4  | 6437  | coding    | PF00481 |
| MSTRG. 15105. 6  | 2499  | coding    | PF00481 |
| MSTRG. 15105. 8  | 6933  | coding    | PF00481 |
| MSTRG. 15105. 9  | 7848  | noncoding | —       |
| MSTRG. 15106. 1  | 10859 | noncoding | —       |
| MSTRG. 15106. 2  | 8542  | noncoding | —       |
| MSTRG. 15106. 3  | 3626  | noncoding | —       |
| MSTRG. 15107. 1  | 6926  | coding    | PF00102 |
| MSTRG. 15108. 1  | 1574  | noncoding | —       |
| MSTRG. 15108. 2  | 1480  | noncoding | —       |
| MSTRG. 15109. 1  | 222   | noncoding | —       |
| MSTRG. 15109. 2  | 322   | noncoding | —       |
| MSTRG. 15105. 11 | 2225  | noncoding | —       |
| MSTRG. 15124. 5  | 4675  | coding    | PF00326 |
| MSTRG. 15126. 1  | 898   | noncoding | —       |
| MSTRG. 15127. 5  | 803   | noncoding | —       |
| MSTRG. 15127. 4  | 3620  | noncoding | —       |
| MSTRG. 15127. 3  | 13780 | noncoding | —       |
| MSTRG. 15127. 1  | 23661 | noncoding | —       |
| MSTRG. 15129. 1  | 2971  | noncoding | —       |
| MSTRG. 15131. 1  | 7208  | noncoding | —       |
| MSTRG. 15132. 1  | 3050  | noncoding | —       |
| MSTRG. 15118. 3  | 1548  | coding    | PF12836 |
| MSTRG. 15119. 1  | 290   | noncoding | —       |
| MSTRG. 15141. 1  | 6694  | noncoding | —       |
| MSTRG. 15141. 2  | 5737  | coding    | PF14598 |
| MSTRG. 15141. 4  | 4945  | coding    | PF14598 |
| MSTRG. 15138. 1  | 1887  | coding    | PF15444 |
| MSTRG. 15138. 2  | 1284  | noncoding | —       |
| MSTRG. 15145. 1  | 3875  | coding    | PF00071 |
| MSTRG. 15146. 4  | 5788  | noncoding | —       |
| MSTRG. 15146. 5  | 1914  | coding    | PF06699 |
| MSTRG. 15146. 6  | 1297  | coding    | PF06699 |
| MSTRG. 15146. 7  | 1154  | coding    | PF06699 |
| MSTRG. 15146. 10 | 733   | coding    | PF06699 |
| MSTRG. 15146. 13 | 1645  | coding    | PF06699 |
| MSTRG. 15146. 11 | 1001  | coding    | PF06699 |
| MSTRG. 15146. 15 | 1462  | coding    | PF06699 |
| MSTRG. 15146. 8  | 1678  | coding    | PF06699 |
| MSTRG. 15146. 14 | 755   | coding    | PF06699 |
| MSTRG. 15146. 12 | 758   | coding    | PF06699 |
| MSTRG. 15147. 2  | 1292  | coding    | PF10235 |
| MSTRG. 15149. 1  | 4899  | noncoding | —       |

|                |       |           |         |
|----------------|-------|-----------|---------|
| MSTRG.15151.1  | 1019  | noncoding | -       |
| MSTRG.15152.1  | 1501  | noncoding | -       |
| MSTRG.15143.1  | 1047  | noncoding | -       |
| MSTRG.15156.3  | 2164  | noncoding | -       |
| MSTRG.15156.4  | 3230  | noncoding | -       |
| MSTRG.15153.1  | 1824  | coding    | PF00086 |
| MSTRG.15153.2  | 1540  | noncoding | -       |
| MSTRG.15167.2  | 1059  | noncoding | -       |
| MSTRG.15174.3  | 4973  | coding    | PF12937 |
| MSTRG.15175.1  | 3384  | noncoding | -       |
| MSTRG.15176.1  | 2558  | noncoding | -       |
| MSTRG.15174.4  | 14199 | noncoding | -       |
| MSTRG.15174.5  | 13283 | noncoding | -       |
| MSTRG.15177.1  | 2083  | noncoding | -       |
| MSTRG.15181.1  | 7800  | coding    | PF10212 |
| MSTRG.15181.5  | 3333  | noncoding | -       |
| MSTRG.15183.2  | 886   | coding    | PF03153 |
| MSTRG.15184.1  | 1996  | noncoding | -       |
| MSTRG.15184.2  | 3413  | noncoding | -       |
| MSTRG.15185.1  | 6646  | noncoding | -       |
| MSTRG.15184.3  | 2602  | noncoding | -       |
| MSTRG.15184.5  | 2028  | noncoding | -       |
| MSTRG.15184.9  | 768   | noncoding | -       |
| MSTRG.15184.10 | 11418 | noncoding | -       |
| MSTRG.15188.1  | 1409  | noncoding | -       |
| MSTRG.15188.2  | 1557  | noncoding | -       |
| MSTRG.15190.1  | 3920  | coding    | PF12369 |
| MSTRG.15190.6  | 3421  | noncoding | -       |
| MSTRG.15191.1  | 7421  | noncoding | -       |
| MSTRG.15192.1  | 13063 | noncoding | -       |
| MSTRG.15194.1  | 14302 | noncoding | -       |
| MSTRG.15219.1  | 8178  | coding    | PF02210 |
| MSTRG.15219.2  | 4185  | coding    | PF02210 |
| MSTRG.15219.3  | 7295  | coding    | PF02210 |
| MSTRG.15220.1  | 240   | noncoding | -       |
| MSTRG.15221.1  | 202   | noncoding | -       |
| MSTRG.15227.1  | 2725  | noncoding | -       |
| MSTRG.15253.1  | 1599  | noncoding | -       |
| MSTRG.15197.1  | 209   | noncoding | -       |
| MSTRG.15199.1  | 416   | noncoding | -       |
| MSTRG.15209.3  | 3046  | coding    | PF12796 |
| MSTRG.15210.1  | 9596  | coding    | PF02994 |
| MSTRG.15210.2  | 2612  | coding    | PF02994 |
| MSTRG.15209.4  | 621   | coding    | PF12796 |
| MSTRG.15212.1  | 231   | noncoding | -       |
| MSTRG.15213.2  | 417   | noncoding | -       |
| MSTRG.15268.1  | 922   | noncoding | -       |
| MSTRG.15268.2  | 923   | noncoding | -       |
| MSTRG.15284.1  | 1933  | noncoding | -       |
| MSTRG.15287.5  | 9132  | coding    | PF00435 |
| MSTRG.15287.6  | 11326 | coding    | PF00435 |
| MSTRG.15291.1  | 1586  | noncoding | -       |
| MSTRG.15296.3  | 2772  | coding    | PF13838 |
| MSTRG.15302.2  | 8977  | noncoding | -       |

|               |       |           |         |
|---------------|-------|-----------|---------|
| MSTRG.15312.1 | 8711  | noncoding | -       |
| MSTRG.15304.1 | 1395  | noncoding | -       |
| MSTRG.15328.2 | 947   | coding    | PF09765 |
| MSTRG.15333.1 | 658   | noncoding | -       |
| MSTRG.15338.1 | 922   | noncoding | -       |
| MSTRG.15347.1 | 9644  | coding    | PF16179 |
| MSTRG.15353.1 | 2313  | noncoding | -       |
| MSTRG.15359.2 | 4802  | coding    | PF11822 |
| MSTRG.15360.1 | 15509 | noncoding | -       |
| MSTRG.15360.2 | 497   | noncoding | -       |
| MSTRG.15362.1 | 3175  | noncoding | -       |
| MSTRG.15357.1 | 610   | noncoding | -       |
| MSTRG.15368.2 | 1992  | coding    | PF00735 |
| MSTRG.15368.3 | 1815  | coding    | PF00735 |
| MSTRG.15375.2 | 10062 | coding    | PF00638 |
| MSTRG.15379.2 | 4215  | coding    | PF16704 |
| MSTRG.15381.1 | 652   | coding    | PF00685 |
| MSTRG.15381.2 | 700   | coding    | PF00685 |
| MSTRG.15381.3 | 728   | coding    | PF00685 |
| MSTRG.15380.1 | 990   | noncoding | -       |
| MSTRG.15380.2 | 851   | noncoding | -       |
| MSTRG.15383.1 | 431   | noncoding | -       |
| MSTRG.15386.3 | 1384  | coding    | PF01370 |
| MSTRG.15386.5 | 7941  | coding    | PF01370 |
| MSTRG.15394.2 | 599   | coding    | PF16860 |
| MSTRG.15394.1 | 2656  | coding    | PF16860 |
| MSTRG.15399.1 | 706   | noncoding | -       |
| MSTRG.15405.4 | 4925  | coding    | PF01369 |
| MSTRG.15405.6 | 4521  | coding    | PF01369 |
| MSTRG.15402.1 | 647   | noncoding | -       |
| MSTRG.15416.3 | 291   | noncoding | -       |
| MSTRG.15416.4 | 1929  | noncoding | -       |
| MSTRG.15421.1 | 2559  | coding    | PF13639 |
| MSTRG.15421.2 | 3588  | coding    | PF13639 |
| MSTRG.15422.1 | 654   | noncoding | -       |
| MSTRG.15423.1 | 710   | noncoding | -       |
| MSTRG.15426.4 | 4400  | coding    | PF03134 |
| MSTRG.15427.2 | 909   | noncoding | -       |
| MSTRG.15429.6 | 2428  | coding    | PF09731 |
| MSTRG.15429.7 | 2647  | coding    | PF09731 |
| MSTRG.15429.8 | 2668  | coding    | PF09731 |
| MSTRG.15431.1 | 6386  | coding    | PF00623 |
| MSTRG.15431.3 | 6033  | coding    | PF00623 |
| MSTRG.15433.3 | 2884  | coding    | PF00777 |
| MSTRG.15433.5 | 10434 | coding    | PF00777 |
| MSTRG.15436.2 | 2137  | noncoding | -       |
| MSTRG.15436.3 | 2096  | noncoding | -       |
| MSTRG.15442.1 | 3195  | noncoding | -       |
| MSTRG.15444.2 | 672   | noncoding | -       |
| MSTRG.15444.3 | 3217  | noncoding | -       |
| MSTRG.15447.5 | 2745  | noncoding | -       |
| MSTRG.15447.4 | 2462  | noncoding | -       |
| MSTRG.15447.6 | 2298  | noncoding | -       |
| MSTRG.15447.8 | 2307  | noncoding | -       |



|               |       |           |         |
|---------------|-------|-----------|---------|
| MSTRG.15447.9 | 2434  | noncoding | -       |
| MSTRG.15450.2 | 2965  | noncoding | -       |
| MSTRG.15450.3 | 2578  | coding    | PF08347 |
| MSTRG.15457.1 | 3925  | noncoding | -       |
| MSTRG.15467.2 | 5517  | coding    | PF03028 |
| MSTRG.15469.1 | 382   | noncoding | -       |
| MSTRG.15470.1 | 201   | noncoding | -       |
| MSTRG.15471.1 | 248   | noncoding | -       |
| MSTRG.15486.2 | 2612  | coding    | PF01044 |
| MSTRG.15486.4 | 582   | coding    | PF01044 |
| MSTRG.15490.1 | 4286  | noncoding | -       |
| MSTRG.15491.1 | 705   | noncoding | -       |
| MSTRG.15492.1 | 24385 | coding    | PF00078 |
| MSTRG.15492.2 | 17879 | coding    | PF00078 |
| MSTRG.15493.1 | 9873  | noncoding | -       |
| MSTRG.15494.1 | 4026  | noncoding | -       |
| MSTRG.15486.5 | 7387  | coding    | PF01044 |
| MSTRG.15494.2 | 3078  | noncoding | -       |
| MSTRG.15497.1 | 17787 | noncoding | -       |
| MSTRG.15499.1 | 5518  | noncoding | -       |
| MSTRG.15499.2 | 965   | noncoding | -       |
| MSTRG.15500.1 | 5984  | noncoding | -       |
| MSTRG.15502.1 | 6800  | noncoding | -       |
| MSTRG.15503.1 | 3354  | noncoding | -       |
| MSTRG.15502.2 | 2046  | noncoding | -       |
| MSTRG.15477.1 | 468   | noncoding | -       |
| MSTRG.15480.2 | 3289  | noncoding | -       |
| MSTRG.15532.2 | 12713 | noncoding | -       |
| MSTRG.15532.1 | 12896 | noncoding | -       |
| MSTRG.15532.4 | 7549  | noncoding | -       |
| MSTRG.15532.5 | 11562 | noncoding | -       |
| MSTRG.15532.3 | 11739 | noncoding | -       |
| MSTRG.15532.6 | 12618 | noncoding | -       |
| MSTRG.15533.1 | 3794  | noncoding | -       |
| MSTRG.15532.8 | 6647  | noncoding | -       |
| MSTRG.15534.1 | 1701  | noncoding | -       |
| MSTRG.15535.1 | 3584  | coding    | PF08767 |
| MSTRG.15536.1 | 6905  | coding    | PF01198 |
| MSTRG.15535.3 | 4187  | coding    | PF08767 |
| MSTRG.15535.4 | 4271  | coding    | PF08767 |
| MSTRG.15538.1 | 6229  | noncoding | -       |
| MSTRG.15517.1 | 2687  | noncoding | -       |
| MSTRG.15518.4 | 2595  | coding    | PF10595 |
| MSTRG.15518.5 | 3270  | coding    | PF10595 |
| MSTRG.15518.6 | 4756  | coding    | PF10595 |
| MSTRG.15518.8 | 2915  | coding    | PF10595 |
| MSTRG.15518.7 | 2648  | coding    | PF10595 |
| MSTRG.15519.1 | 1511  | noncoding | -       |
| MSTRG.15521.2 | 5932  | coding    | PF07258 |
| MSTRG.15521.3 | 3976  | coding    | PF07258 |
| MSTRG.15528.3 | 398   | noncoding | -       |
| MSTRG.15540.2 | 4033  | coding    | PF00307 |
| MSTRG.15540.8 | 2323  | noncoding | -       |
| MSTRG.15540.7 | 3471  | coding    | PF00307 |

|                |       |           |         |
|----------------|-------|-----------|---------|
| MSTRG.15547.1  | 6125  | noncoding | -       |
| MSTRG.15547.2  | 3745  | noncoding | -       |
| MSTRG.15547.3  | 4395  | noncoding | -       |
| MSTRG.15548.1  | 5981  | noncoding | -       |
| MSTRG.15548.2  | 1336  | noncoding | -       |
| MSTRG.15548.3  | 1165  | noncoding | -       |
| MSTRG.15549.1  | 373   | noncoding | -       |
| MSTRG.15554.1  | 1885  | coding    | PF02994 |
| MSTRG.15572.1  | 1045  | noncoding | -       |
| MSTRG.15571.3  | 5703  | coding    | PF07928 |
| MSTRG.15571.4  | 1151  | noncoding | -       |
| MSTRG.15563.1  | 4687  | noncoding | -       |
| MSTRG.15574.1  | 972   | coding    | PF00337 |
| MSTRG.15575.1  | 1463  | noncoding | -       |
| MSTRG.15594.4  | 5511  | noncoding | -       |
| MSTRG.15595.1  | 1719  | coding    | PF00071 |
| MSTRG.15595.2  | 2486  | coding    | PF00071 |
| MSTRG.15596.2  | 4643  | coding    | PF05210 |
| MSTRG.15596.3  | 4602  | coding    | PF05210 |
| MSTRG.15600.2  | 2301  | coding    | PF16493 |
| MSTRG.15601.1  | 858   | noncoding | -       |
| MSTRG.15602.1  | 1772  | noncoding | -       |
| MSTRG.15602.2  | 2131  | noncoding | -       |
| MSTRG.15603.3  | 2969  | coding    | PF15350 |
| MSTRG.15611.2  | 1310  | noncoding | -       |
| MSTRG.15614.2  | 888   | coding    | PF13499 |
| MSTRG.15618.1  | 1684  | noncoding | -       |
| MSTRG.15619.2  | 3075  | coding    | PF05586 |
| MSTRG.15619.3  | 1343  | coding    | PF05587 |
| MSTRG.15619.4  | 2340  | coding    | PF05586 |
| MSTRG.15625.1  | 12625 | coding    | PF15282 |
| MSTRG.15625.2  | 4594  | coding    | PF15282 |
| MSTRG.15628.2  | 3037  | noncoding | -       |
| MSTRG.15630.3  | 547   | noncoding | -       |
| MSTRG.15630.2  | 4743  | noncoding | -       |
| MSTRG.15638.2  | 3725  | coding    | PF14952 |
| MSTRG.15638.3  | 3611  | coding    | PF00076 |
| MSTRG.15638.4  | 1852  | coding    | PF00076 |
| MSTRG.15638.8  | 1044  | coding    | PF00076 |
| MSTRG.15638.10 | 3082  | noncoding | -       |
| MSTRG.15644.1  | 2970  | coding    | PF00648 |
| MSTRG.15644.4  | 1106  | noncoding | -       |
| MSTRG.15644.7  | 2051  | noncoding | -       |
| MSTRG.15644.5  | 1023  | noncoding | -       |
| MSTRG.15644.6  | 1205  | noncoding | -       |
| MSTRG.15650.1  | 787   | noncoding | -       |
| MSTRG.15651.1  | 2886  | noncoding | -       |
| MSTRG.15656.1  | 2368  | noncoding | -       |
| MSTRG.15671.1  | 870   | noncoding | -       |
| MSTRG.15654.1  | 2367  | coding    | PF01302 |
| MSTRG.15654.2  | 3056  | coding    | PF01302 |
| MSTRG.15677.1  | 2193  | noncoding | -       |
| MSTRG.15678.2  | 11983 | coding    | PF11357 |
| MSTRG.15679.1  | 3739  | noncoding | -       |

|                |       |           |         |
|----------------|-------|-----------|---------|
| MSTRG.15678.3  | 2758  | coding    | PF00149 |
| MSTRG.15678.4  | 3569  | coding    | PF00149 |
| MSTRG.15672.1  | 260   | noncoding | —       |
| MSTRG.15674.1  | 1303  | noncoding | —       |
| MSTRG.15675.1  | 652   | noncoding | —       |
| MSTRG.15681.2  | 543   | noncoding | —       |
| MSTRG.15681.3  | 875   | noncoding | —       |
| MSTRG.15681.5  | 1679  | coding    | PF06113 |
| MSTRG.15681.4  | 1921  | coding    | PF06113 |
| MSTRG.15682.1  | 2250  | noncoding | —       |
| MSTRG.15683.1  | 6218  | noncoding | —       |
| MSTRG.15681.6  | 576   | noncoding | —       |
| MSTRG.15684.1  | 1064  | coding    | PF00294 |
| MSTRG.15681.8  | 804   | noncoding | —       |
| MSTRG.15685.2  | 4566  | coding    | PF00498 |
| MSTRG.15692.1  | 228   | noncoding | —       |
| MSTRG.15694.3  | 19246 | noncoding | —       |
| MSTRG.15694.1  | 18271 | noncoding | —       |
| MSTRG.15694.2  | 18251 | noncoding | —       |
| MSTRG.15694.4  | 18310 | noncoding | —       |
| MSTRG.15701.4  | 2350  | noncoding | —       |
| MSTRG.15701.5  | 2086  | noncoding | —       |
| MSTRG.15703.5  | 1604  | noncoding | —       |
| MSTRG.15703.4  | 1842  | noncoding | —       |
| MSTRG.15703.6  | 1839  | noncoding | —       |
| MSTRG.15703.7  | 1628  | noncoding | —       |
| MSTRG.15705.3  | 1646  | coding    | PF01008 |
| MSTRG.15707.2  | 873   | coding    | PF04117 |
| MSTRG.15707.4  | 851   | coding    | PF04117 |
| MSTRG.15714.3  | 1658  | coding    | PF00226 |
| MSTRG.15714.4  | 1587  | coding    | PF00226 |
| MSTRG.15715.1  | 3912  | noncoding | —       |
| MSTRG.15715.5  | 3001  | noncoding | —       |
| MSTRG.15715.6  | 3051  | noncoding | —       |
| MSTRG.15719.2  | 957   | noncoding | —       |
| MSTRG.15720.1  | 3508  | noncoding | —       |
| MSTRG.15720.2  | 3709  | noncoding | —       |
| MSTRG.15720.3  | 3291  | noncoding | —       |
| MSTRG.15708.1  | 4083  | noncoding | —       |
| MSTRG.15709.1  | 2210  | coding    | PF15728 |
| MSTRG.15711.3  | 575   | noncoding | —       |
| MSTRG.15722.4  | 2936  | noncoding | —       |
| MSTRG.15722.10 | 2434  | noncoding | —       |
| MSTRG.15722.9  | 2613  | noncoding | —       |
| MSTRG.15724.2  | 3112  | coding    | PF10151 |
| MSTRG.15726.5  | 1683  | coding    | PF03271 |
| MSTRG.15726.6  | 1594  | coding    | PF03271 |
| MSTRG.15723.2  | 2288  | noncoding | —       |
| MSTRG.15723.3  | 1558  | noncoding | —       |
| MSTRG.15747.3  | 8162  | coding    | PF13919 |
| MSTRG.15750.2  | 2918  | noncoding | —       |
| MSTRG.15750.3  | 5430  | noncoding | —       |
| MSTRG.15750.4  | 3437  | noncoding | —       |
| MSTRG.15751.5  | 1404  | noncoding | —       |

|                |       |           |         |
|----------------|-------|-----------|---------|
| MSTRG.15751.4  | 2642  | noncoding | -       |
| MSTRG.15752.3  | 4788  | coding    | PF00071 |
| MSTRG.15752.4  | 8665  | coding    | PF00071 |
| MSTRG.15752.5  | 9446  | coding    | PF00071 |
| MSTRG.15754.2  | 3090  | coding    | PF00211 |
| MSTRG.15756.4  | 2477  | noncoding | -       |
| MSTRG.15766.3  | 4807  | coding    | PF14598 |
| MSTRG.15766.4  | 4939  | coding    | PF14598 |
| MSTRG.15766.10 | 4530  | coding    | PF14598 |
| MSTRG.15766.8  | 4587  | coding    | PF14598 |
| MSTRG.15766.9  | 4533  | coding    | PF14598 |
| MSTRG.15767.1  | 2904  | noncoding | -       |
| MSTRG.15766.11 | 4456  | noncoding | -       |
| MSTRG.15766.12 | 274   | noncoding | -       |
| MSTRG.15766.13 | 1054  | noncoding | -       |
| MSTRG.15768.1  | 1452  | noncoding | -       |
| MSTRG.15769.1  | 2978  | noncoding | -       |
| MSTRG.15773.1  | 6448  | noncoding | -       |
| MSTRG.15773.2  | 8359  | noncoding | -       |
| MSTRG.15776.1  | 5779  | noncoding | -       |
| MSTRG.15776.2  | 2522  | noncoding | -       |
| MSTRG.15778.3  | 2021  | coding    | PF00235 |
| MSTRG.15778.2  | 2610  | coding    | PF00235 |
| MSTRG.15781.1  | 1016  | coding    | PF00254 |
| MSTRG.15781.5  | 1458  | coding    | PF00254 |
| MSTRG.15781.7  | 638   | coding    | PF00254 |
| MSTRG.15782.1  | 4182  | coding    | PF15390 |
| MSTRG.15785.1  | 334   | noncoding | -       |
| MSTRG.15786.1  | 1213  | noncoding | -       |
| MSTRG.15786.2  | 242   | noncoding | -       |
| MSTRG.15786.3  | 1632  | noncoding | -       |
| MSTRG.15788.1  | 2033  | noncoding | -       |
| MSTRG.15791.1  | 917   | noncoding | -       |
| MSTRG.15793.1  | 2573  | noncoding | -       |
| MSTRG.15795.1  | 343   | noncoding | -       |
| MSTRG.15796.1  | 7244  | coding    | PF00567 |
| MSTRG.15796.2  | 10375 | noncoding | -       |
| MSTRG.15796.3  | 5598  | noncoding | -       |
| MSTRG.15797.4  | 581   | coding    | PF10230 |
| MSTRG.15797.6  | 1299  | coding    | PF10230 |
| MSTRG.15798.1  | 970   | noncoding | -       |
| MSTRG.15804.2  | 3188  | noncoding | -       |
| MSTRG.15804.3  | 1588  | noncoding | -       |
| MSTRG.15804.5  | 3021  | noncoding | -       |
| MSTRG.15800.1  | 4106  | noncoding | -       |
| MSTRG.15801.1  | 2202  | coding    | PF00071 |
| MSTRG.15809.10 | 5328  | noncoding | -       |
| MSTRG.15810.1  | 295   | noncoding | -       |
| MSTRG.15811.1  | 3224  | noncoding | -       |
| MSTRG.15812.1  | 2054  | noncoding | -       |
| MSTRG.15813.2  | 9314  | noncoding | -       |
| MSTRG.15813.1  | 9379  | noncoding | -       |
| MSTRG.15813.3  | 7099  | noncoding | -       |
| MSTRG.15813.4  | 7144  | noncoding | -       |

|                |      |           |         |
|----------------|------|-----------|---------|
| MSTRG.15809.11 | 4260 | noncoding | -       |
| MSTRG.15806.1  | 2358 | noncoding | -       |
| MSTRG.15807.1  | 1665 | noncoding | -       |
| MSTRG.15816.1  | 635  | noncoding | -       |
| MSTRG.15816.2  | 547  | noncoding | -       |
| MSTRG.15814.1  | 1952 | noncoding | -       |
| MSTRG.15817.1  | 1937 | noncoding | -       |
| MSTRG.15821.1  | 225  | noncoding | -       |
| MSTRG.15822.3  | 1874 | coding    | PF06189 |
| MSTRG.15826.1  | 953  | noncoding | -       |
| MSTRG.15832.1  | 351  | noncoding | -       |
| MSTRG.15834.1  | 483  | noncoding | -       |
| MSTRG.15834.2  | 565  | noncoding | -       |
| MSTRG.15835.1  | 970  | noncoding | -       |
| MSTRG.15835.2  | 458  | noncoding | -       |
| MSTRG.15841.1  | 3093 | coding    | PF15492 |
| MSTRG.15841.2  | 1562 | coding    | PF15492 |
| MSTRG.15843.2  | 2749 | noncoding | -       |
| MSTRG.15846.6  | 1120 | coding    | PF02146 |
| MSTRG.15846.5  | 1274 | coding    | PF02146 |
| MSTRG.15847.1  | 1425 | noncoding | -       |
| MSTRG.15848.1  | 1544 | noncoding | -       |
| MSTRG.15848.2  | 2131 | noncoding | -       |
| MSTRG.15848.3  | 1420 | noncoding | -       |
| MSTRG.15858.1  | 1678 | noncoding | -       |
| MSTRG.15858.2  | 2155 | noncoding | -       |
| MSTRG.15858.3  | 2179 | coding    | PF01399 |
| MSTRG.15868.1  | 6431 | coding    | PF08235 |
| MSTRG.15868.6  | 5891 | coding    | PF08235 |
| MSTRG.15868.9  | 5553 | coding    | PF08235 |
| MSTRG.15868.7  | 6195 | coding    | PF08235 |
| MSTRG.15868.3  | 5457 | coding    | PF08235 |
| MSTRG.15868.10 | 3431 | coding    | PF08235 |
| MSTRG.15867.3  | 1749 | noncoding | -       |
| MSTRG.15873.2  | 2979 | coding    | PF00085 |
| MSTRG.15874.2  | 1317 | coding    | PF03223 |
| MSTRG.15879.2  | 2908 | noncoding | -       |
| MSTRG.15886.2  | 4308 | noncoding | -       |
| MSTRG.15890.1  | 320  | noncoding | -       |
| MSTRG.15891.2  | 1860 | coding    | PF00244 |
| MSTRG.15896.2  | 2954 | coding    | PF00657 |
| MSTRG.15902.5  | 3058 | coding    | PF01412 |
| MSTRG.15902.3  | 3386 | coding    | PF01412 |
| MSTRG.15902.4  | 3350 | coding    | PF01412 |
| MSTRG.15902.6  | 3850 | coding    | PF01412 |
| MSTRG.15903.1  | 722  | noncoding | -       |
| MSTRG.15897.1  | 2102 | noncoding | -       |
| MSTRG.15898.1  | 2839 | noncoding | -       |
| MSTRG.15899.3  | 3138 | noncoding | -       |
| MSTRG.15899.2  | 2197 | noncoding | -       |
| MSTRG.15899.4  | 2094 | noncoding | -       |
| MSTRG.15909.4  | 9162 | coding    | PF12796 |
| MSTRG.15909.1  | 4613 | coding    | PF12796 |
| MSTRG.15909.6  | 6799 | coding    | PF12796 |

|                |       |           |         |
|----------------|-------|-----------|---------|
| MSTRG.15907.1  | 493   | noncoding | -       |
| MSTRG.15917.2  | 5884  | noncoding | -       |
| MSTRG.15917.3  | 5347  | noncoding | -       |
| MSTRG.15917.6  | 1931  | noncoding | -       |
| MSTRG.15917.7  | 1470  | noncoding | -       |
| MSTRG.15917.5  | 1787  | noncoding | -       |
| MSTRG.15917.8  | 2151  | noncoding | -       |
| MSTRG.15917.9  | 1705  | noncoding | -       |
| MSTRG.15917.10 | 3006  | noncoding | -       |
| MSTRG.15914.2  | 3332  | noncoding | -       |
| MSTRG.15913.1  | 994   | noncoding | -       |
| MSTRG.15921.1  | 513   | noncoding | -       |
| MSTRG.15929.1  | 6697  | coding    | PF12004 |
| MSTRG.15929.4  | 6237  | coding    | PF12004 |
| MSTRG.15930.1  | 2895  | noncoding | -       |
| MSTRG.15929.5  | 6830  | coding    | PF12004 |
| MSTRG.15929.7  | 9739  | coding    | PF12004 |
| MSTRG.15929.9  | 9805  | coding    | PF12004 |
| MSTRG.15929.10 | 10504 | coding    | PF12004 |
| MSTRG.15929.11 | 6720  | coding    | PF12004 |
| MSTRG.15932.1  | 10762 | coding    | PF03133 |
| MSTRG.15932.2  | 1034  | noncoding | -       |
| MSTRG.15931.1  | 359   | noncoding | -       |
| MSTRG.15936.2  | 915   | noncoding | -       |
| MSTRG.15936.3  | 768   | noncoding | -       |
| MSTRG.15937.3  | 754   | noncoding | -       |
| MSTRG.15935.1  | 1645  | coding    | PF00046 |
| MSTRG.15940.1  | 1464  | coding    | PF01765 |
| MSTRG.15940.4  | 689   | coding    | PF01765 |
| MSTRG.15943.1  | 494   | coding    | PF13853 |
| MSTRG.15961.2  | 8410  | coding    | PF00651 |
| MSTRG.15962.3  | 4424  | coding    | PF00566 |
| MSTRG.15962.2  | 4160  | coding    | PF00566 |
| MSTRG.15962.7  | 15142 | coding    | PF00566 |
| MSTRG.15963.1  | 5240  | noncoding | -       |
| MSTRG.15964.1  | 9389  | noncoding | -       |
| MSTRG.15952.1  | 3706  | coding    | PF02141 |
| MSTRG.15955.1  | 3073  | noncoding | -       |
| MSTRG.15956.1  | 6436  | noncoding | -       |
| MSTRG.15957.1  | 3004  | noncoding | -       |
| MSTRG.15958.1  | 3338  | noncoding | -       |
| MSTRG.15951.1  | 426   | noncoding | -       |
| MSTRG.15969.2  | 1819  | coding    | PF00069 |
| MSTRG.15969.3  | 1838  | coding    | PF00069 |
| MSTRG.15969.4  | 2062  | coding    | PF00069 |
| MSTRG.15973.1  | 311   | noncoding | -       |
| MSTRG.15974.1  | 3377  | coding    | PF00105 |
| MSTRG.15974.5  | 2014  | coding    | PF00105 |
| MSTRG.15978.5  | 14287 | noncoding | -       |
| MSTRG.15978.7  | 3523  | coding    | PF00105 |
| MSTRG.15978.6  | 23994 | noncoding | -       |
| MSTRG.15979.1  | 2702  | noncoding | -       |
| MSTRG.15980.1  | 429   | noncoding | -       |
| MSTRG.15981.1  | 5408  | noncoding | -       |

|                |      |           |         |
|----------------|------|-----------|---------|
| MSTRG.15978.8  | 8066 | noncoding | -       |
| MSTRG.15982.1  | 670  | noncoding | -       |
| MSTRG.15978.9  | 4319 | noncoding | -       |
| MSTRG.15976.2  | 1280 | coding    | PF00400 |
| MSTRG.15990.4  | 3806 | noncoding | -       |
| MSTRG.15994.1  | 1538 | noncoding | -       |
| MSTRG.15996.1  | 430  | noncoding | -       |
| MSTRG.15997.1  | 946  | noncoding | -       |
| MSTRG.15998.4  | 2225 | coding    | PF16978 |
| MSTRG.15998.3  | 1733 | coding    | PF16978 |
| MSTRG.15998.10 | 8087 | coding    | PF16979 |
| MSTRG.15998.11 | 2074 | coding    | PF16978 |
| MSTRG.15998.9  | 2099 | coding    | PF16978 |
| MSTRG.15999.1  | 580  | noncoding | -       |
| MSTRG.16000.1  | 609  | noncoding | -       |
| MSTRG.16003.1  | 1701 | coding    | PF03792 |
| MSTRG.16004.1  | 2706 | noncoding | -       |
| MSTRG.16006.1  | 322  | noncoding | -       |
| MSTRG.16005.2  | 3557 | noncoding | -       |
| MSTRG.16012.1  | 627  | noncoding | -       |
| MSTRG.16013.2  | 3727 | coding    | PF02145 |
| MSTRG.16014.1  | 1162 | noncoding | -       |
| MSTRG.16015.2  | 1837 | coding    | PF00083 |
| MSTRG.16019.1  | 8210 | noncoding | -       |
| MSTRG.16019.2  | 3785 | noncoding | -       |
| MSTRG.16022.2  | 3750 | noncoding | -       |
| MSTRG.16027.2  | 3425 | coding    | PF00017 |
| MSTRG.16031.2  | 2418 | noncoding | -       |
| MSTRG.16034.2  | 1329 | noncoding | -       |
| MSTRG.16035.1  | 778  | noncoding | -       |
| MSTRG.16039.1  | 4579 | coding    | PF00153 |
| MSTRG.16039.2  | 2933 | coding    | PF00153 |
| MSTRG.16041.1  | 876  | coding    | PF00061 |
| MSTRG.16042.2  | 841  | coding    | PF03670 |
| MSTRG.16042.3  | 708  | coding    | PF03670 |
| MSTRG.16042.4  | 805  | coding    | PF03670 |
| MSTRG.16044.3  | 4911 | coding    | PF02212 |
| MSTRG.16049.2  | 4387 | coding    | PF01509 |
| MSTRG.16050.3  | 1172 | coding    | PF05019 |
| MSTRG.16050.4  | 1783 | coding    | PF05019 |
| MSTRG.16052.1  | 7813 | noncoding | -       |
| MSTRG.16052.2  | 6044 | noncoding | -       |
| MSTRG.16052.3  | 5605 | noncoding | -       |
| MSTRG.16056.1  | 4868 | noncoding | -       |
| MSTRG.16057.12 | 2360 | noncoding | -       |
| MSTRG.16057.15 | 2355 | noncoding | -       |
| MSTRG.16057.11 | 4740 | noncoding | -       |
| MSTRG.16057.14 | 4797 | noncoding | -       |
| MSTRG.16057.17 | 5223 | noncoding | -       |
| MSTRG.16057.19 | 4724 | noncoding | -       |
| MSTRG.16057.20 | 3575 | noncoding | -       |
| MSTRG.16067.2  | 1427 | noncoding | -       |
| MSTRG.16058.1  | 1867 | coding    | PF00956 |
| MSTRG.16064.2  | 3723 | coding    | PF00566 |

|                |       |           |         |
|----------------|-------|-----------|---------|
| MSTRG.16064.3  | 2680  | coding    | PF00566 |
| MSTRG.16064.4  | 1835  | coding    | PF00566 |
| MSTRG.16064.7  | 3732  | coding    | PF00566 |
| MSTRG.16069.2  | 2238  | coding    | PF02598 |
| MSTRG.16069.5  | 1997  | noncoding | —       |
| MSTRG.16069.6  | 2997  | noncoding | —       |
| MSTRG.16069.8  | 2411  | noncoding | —       |
| MSTRG.16072.1  | 459   | noncoding | —       |
| MSTRG.16079.2  | 5458  | noncoding | —       |
| MSTRG.16079.4  | 5705  | noncoding | —       |
| MSTRG.16074.1  | 4290  | coding    | PF10265 |
| MSTRG.16074.3  | 2819  | coding    | PF10265 |
| MSTRG.16081.1  | 4134  | coding    | PF00755 |
| MSTRG.16082.2  | 2817  | coding    | PF03095 |
| MSTRG.16082.3  | 2480  | coding    | PF03095 |
| MSTRG.16082.4  | 3498  | coding    | PF03095 |
| MSTRG.16076.2  | 1363  | coding    | PF05760 |
| MSTRG.16083.1  | 4056  | noncoding | —       |
| MSTRG.16083.2  | 1784  | noncoding | —       |
| MSTRG.16083.3  | 887   | noncoding | —       |
| MSTRG.16088.2  | 1103  | coding    | PF05891 |
| MSTRG.16088.4  | 1238  | coding    | PF05891 |
| MSTRG.16085.1  | 1852  | coding    | PF12796 |
| MSTRG.16092.3  | 5902  | coding    | PF00443 |
| MSTRG.16093.3  | 3717  | noncoding | —       |
| MSTRG.16104.1  | 9365  | coding    | PF07714 |
| MSTRG.16104.4  | 7471  | coding    | PF07714 |
| MSTRG.16104.5  | 9852  | coding    | PF07714 |
| MSTRG.16102.1  | 4637  | coding    | PF00147 |
| MSTRG.16109.4  | 7098  | noncoding | —       |
| MSTRG.16110.1  | 930   | noncoding | —       |
| MSTRG.16113.5  | 11038 | coding    | PF07001 |
| MSTRG.16113.6  | 9130  | coding    | PF07001 |
| MSTRG.16113.8  | 9127  | coding    | PF07001 |
| MSTRG.16113.7  | 10949 | coding    | PF07001 |
| MSTRG.16113.9  | 8596  | coding    | PF07001 |
| MSTRG.16113.11 | 10106 | noncoding | —       |
| MSTRG.16113.12 | 5321  | noncoding | —       |
| MSTRG.16113.13 | 8280  | noncoding | —       |
| MSTRG.16113.14 | 7505  | noncoding | —       |
| MSTRG.16117.2  | 5646  | coding    | PF00617 |
| MSTRG.16117.3  | 5436  | coding    | PF00617 |
| MSTRG.16118.1  | 925   | noncoding | —       |
| MSTRG.16123.1  | 2218  | noncoding | —       |
| MSTRG.16128.1  | 13631 | coding    | PF13086 |
| MSTRG.16128.5  | 11064 | coding    | PF13086 |
| MSTRG.16128.6  | 11072 | coding    | PF13087 |
| MSTRG.16129.1  | 7920  | noncoding | —       |
| MSTRG.16129.2  | 7779  | noncoding | —       |
| MSTRG.16129.3  | 3815  | noncoding | —       |
| MSTRG.16132.2  | 2530  | coding    | PF00270 |
| MSTRG.16132.3  | 3012  | coding    | PF00270 |
| MSTRG.16133.1  | 9437  | noncoding | —       |
| MSTRG.16133.2  | 7142  | coding    | PF12657 |



|               |       |           |         |
|---------------|-------|-----------|---------|
| MSTRG.16133.4 | 13592 | coding    | PF12657 |
| MSTRG.16136.1 | 1927  | coding    | PF00406 |
| MSTRG.16136.2 | 1566  | coding    | PF00406 |
| MSTRG.16138.2 | 7927  | coding    | PF04388 |
| MSTRG.16138.5 | 7774  | coding    | PF04388 |
| MSTRG.16138.6 | 3644  | coding    | PF04388 |
| MSTRG.16144.1 | 1032  | coding    | PF03414 |
| MSTRG.16144.4 | 1427  | coding    | PF03414 |
| MSTRG.16148.2 | 5028  | coding    | PF08683 |
| MSTRG.16148.5 | 4796  | coding    | PF08683 |
| MSTRG.16149.1 | 1931  | noncoding | —       |
| MSTRG.16159.1 | 3634  | noncoding | —       |
| MSTRG.16159.2 | 3012  | noncoding | —       |
| MSTRG.16159.3 | 3403  | noncoding | —       |
| MSTRG.16159.4 | 3374  | noncoding | —       |
| MSTRG.16159.5 | 4061  | noncoding | —       |
| MSTRG.16162.1 | 1609  | coding    | PF05180 |
| MSTRG.16163.5 | 5256  | coding    | PF00249 |
| MSTRG.16167.2 | 2961  | coding    | PF00675 |
| MSTRG.16170.5 | 8677  | coding    | PF12931 |
| MSTRG.16174.2 | 1346  | coding    | PF01553 |
| MSTRG.16191.3 | 3437  | noncoding | —       |
| MSTRG.16191.4 | 3793  | noncoding | —       |
| MSTRG.16191.5 | 2778  | noncoding | —       |
| MSTRG.16182.2 | 2155  | noncoding | —       |
| MSTRG.16196.2 | 4848  | coding    | PF00307 |
| MSTRG.16198.1 | 5729  | coding    | PF17035 |
| MSTRG.16198.2 | 5596  | coding    | PF17035 |
| MSTRG.16199.1 | 1408  | noncoding | —       |
| MSTRG.16195.3 | 1574  | coding    | PF00400 |
| MSTRG.16201.2 | 5415  | coding    | PF00104 |
| MSTRG.16201.3 | 4956  | coding    | PF00104 |
| MSTRG.16201.6 | 4636  | coding    | PF00104 |
| MSTRG.16202.1 | 3148  | noncoding | —       |
| MSTRG.16201.7 | 4988  | coding    | PF00104 |
| MSTRG.16203.1 | 2579  | coding    | PF02191 |
| MSTRG.16207.1 | 3073  | noncoding | —       |
| MSTRG.16210.2 | 974   | coding    | PF14892 |
| MSTRG.16211.1 | 2114  | coding    | PF00318 |
| MSTRG.16214.2 | 889   | coding    | PF15110 |
| MSTRG.16214.3 | 694   | coding    | PF15110 |
| MSTRG.16215.1 | 391   | noncoding | —       |
| MSTRG.16217.1 | 10519 | noncoding | —       |
| MSTRG.16218.3 | 3879  | coding    | PF16673 |
| MSTRG.16218.4 | 3780  | coding    | PF16673 |
| MSTRG.16221.4 | 2409  | coding    | PF12937 |
| MSTRG.16221.3 | 2373  | coding    | PF12937 |
| MSTRG.16222.1 | 2518  | coding    | PF12937 |
| MSTRG.16222.3 | 1112  | noncoding | —       |
| MSTRG.16219.1 | 682   | noncoding | —       |
| MSTRG.16226.5 | 825   | coding    | PF15384 |
| MSTRG.16239.3 | 2680  | coding    | PF01532 |
| MSTRG.16239.4 | 2597  | coding    | PF01532 |
| MSTRG.16244.1 | 1808  | coding    | PF01532 |

|                |       |           |         |
|----------------|-------|-----------|---------|
| MSTRG.16244.3  | 2193  | coding    | PF01532 |
| MSTRG.16244.5  | 4077  | coding    | PF01532 |
| MSTRG.16242.7  | 400   | noncoding | —       |
| MSTRG.16233.1  | 4446  | coding    | PF15195 |
| MSTRG.16233.2  | 776   | coding    | PF15195 |
| MSTRG.16248.2  | 2235  | coding    | PF00667 |
| MSTRG.16248.3  | 2286  | coding    | PF00667 |
| MSTRG.16237.1  | 847   | noncoding | —       |
| MSTRG.16252.3  | 1746  | noncoding | —       |
| MSTRG.16252.4  | 2039  | noncoding | —       |
| MSTRG.16252.1  | 1569  | noncoding | —       |
| MSTRG.16253.2  | 1779  | noncoding | —       |
| MSTRG.16253.6  | 1155  | noncoding | —       |
| MSTRG.16253.7  | 1208  | noncoding | —       |
| MSTRG.16254.1  | 3076  | coding    | PF06209 |
| MSTRG.16261.2  | 9022  | coding    | PF00027 |
| MSTRG.16261.6  | 4358  | coding    | PF00027 |
| MSTRG.16261.5  | 4356  | coding    | PF00027 |
| MSTRG.16263.5  | 1641  | noncoding | —       |
| MSTRG.16263.3  | 1891  | noncoding | —       |
| MSTRG.16263.4  | 1577  | noncoding | —       |
| MSTRG.16263.2  | 2132  | noncoding | —       |
| MSTRG.16258.1  | 1887  | noncoding | —       |
| MSTRG.16258.2  | 1985  | noncoding | —       |
| MSTRG.16264.6  | 8035  | coding    | PF00856 |
| MSTRG.16265.1  | 1471  | noncoding | —       |
| MSTRG.16264.10 | 11663 | coding    | PF00856 |
| MSTRG.16264.9  | 4402  | coding    | PF00856 |
| MSTRG.16264.11 | 857   | noncoding | —       |
| MSTRG.16269.1  | 4053  | noncoding | —       |
| MSTRG.16269.2  | 2917  | noncoding | —       |
| MSTRG.16269.3  | 3957  | noncoding | —       |
| MSTRG.16270.1  | 6811  | coding    | PF08763 |
| MSTRG.16270.2  | 6743  | coding    | PF08763 |
| MSTRG.16270.3  | 7592  | coding    | PF08763 |
| MSTRG.16273.1  | 758   | noncoding | —       |
| MSTRG.16274.2  | 1975  | coding    | PF00567 |
| MSTRG.16275.1  | 416   | noncoding | —       |
| MSTRG.16276.1  | 1766  | noncoding | —       |
| MSTRG.16278.2  | 3228  | noncoding | —       |
| MSTRG.16284.1  | 220   | noncoding | —       |
| MSTRG.16288.1  | 4296  | noncoding | —       |
| MSTRG.16291.1  | 2298  | noncoding | —       |
| MSTRG.16296.1  | 894   | noncoding | —       |
| MSTRG.16299.1  | 234   | noncoding | —       |
| MSTRG.16299.2  | 272   | noncoding | —       |
| MSTRG.16302.1  | 680   | noncoding | —       |
| MSTRG.16307.1  | 1719  | noncoding | —       |
| MSTRG.16319.2  | 8888  | coding    | PF05002 |
| MSTRG.16319.3  | 6248  | coding    | PF05002 |
| MSTRG.16319.4  | 6127  | coding    | PF05002 |
| MSTRG.16319.5  | 6230  | coding    | PF05002 |
| MSTRG.16319.6  | 5999  | coding    | PF05002 |
| MSTRG.16320.2  | 4243  | noncoding | —       |

|                |       |           |         |
|----------------|-------|-----------|---------|
| MSTRG.16321.1  | 5529  | coding    | PF00178 |
| MSTRG.16326.1  | 2321  | coding    | PF00651 |
| MSTRG.16327.1  | 2014  | coding    | PF00472 |
| MSTRG.16328.1  | 1120  | noncoding | –       |
| MSTRG.16329.3  | 4686  | coding    | PF12569 |
| MSTRG.16329.4  | 4811  | noncoding | –       |
| MSTRG.16330.2  | 11258 | coding    | PF07728 |
| MSTRG.16332.1  | 4290  | coding    | PF00609 |
| MSTRG.16334.5  | 8920  | coding    | PF05716 |
| MSTRG.16336.1  | 212   | noncoding | –       |
| MSTRG.16337.1  | 1114  | coding    | PF15107 |
| MSTRG.16339.2  | 2852  | noncoding | –       |
| MSTRG.16349.1  | 5659  | noncoding | –       |
| MSTRG.16345.2  | 6023  | noncoding | –       |
| MSTRG.16345.3  | 5904  | noncoding | –       |
| MSTRG.16343.1  | 645   | noncoding | –       |
| MSTRG.16340.1  | 450   | noncoding | –       |
| MSTRG.16351.1  | 1114  | coding    | PF06624 |
| MSTRG.16351.2  | 916   | coding    | PF06624 |
| MSTRG.16352.4  | 2813  | coding    | PF01166 |
| MSTRG.16353.1  | 7663  | noncoding | –       |
| MSTRG.16354.1  | 2841  | noncoding | –       |
| MSTRG.16358.2  | 1869  | coding    | PF10453 |
| MSTRG.16358.3  | 1572  | coding    | PF10453 |
| MSTRG.16361.2  | 9125  | noncoding | –       |
| MSTRG.16361.1  | 4406  | coding    | PF02270 |
| MSTRG.16361.3  | 1968  | coding    | PF02270 |
| MSTRG.16361.5  | 1181  | coding    | PF02270 |
| MSTRG.16361.6  | 8011  | noncoding | –       |
| MSTRG.16361.7  | 1617  | noncoding | –       |
| MSTRG.16364.2  | 4535  | coding    | PF04136 |
| MSTRG.16366.1  | 1102  | coding    | PF03145 |
| MSTRG.16369.4  | 3380  | noncoding | –       |
| MSTRG.16370.1  | 2701  | noncoding | –       |
| MSTRG.16370.2  | 1763  | noncoding | –       |
| MSTRG.16375.3  | 1633  | coding    | PF00756 |
| MSTRG.16378.1  | 343   | noncoding | –       |
| MSTRG.16388.1  | 2009  | noncoding | –       |
| MSTRG.16389.1  | 14558 | noncoding | –       |
| MSTRG.16389.2  | 2125  | noncoding | –       |
| MSTRG.16388.2  | 852   | noncoding | –       |
| MSTRG.16397.3  | 3164  | coding    | PF01359 |
| MSTRG.16399.2  | 2423  | coding    | PF10018 |
| MSTRG.16410.1  | 278   | noncoding | –       |
| MSTRG.16418.1  | 2009  | noncoding | –       |
| MSTRG.16419.6  | 1730  | noncoding | –       |
| MSTRG.16419.5  | 1839  | noncoding | –       |
| MSTRG.16419.7  | 7045  | coding    | PF00041 |
| MSTRG.16419.8  | 6795  | coding    | PF00041 |
| MSTRG.16419.10 | 5663  | coding    | PF00041 |
| MSTRG.16422.1  | 2017  | coding    | PF08569 |
| MSTRG.16422.2  | 2060  | coding    | PF08569 |
| MSTRG.16422.3  | 1702  | coding    | PF08569 |
| MSTRG.16422.6  | 1998  | coding    | PF08569 |

|                |       |           |         |
|----------------|-------|-----------|---------|
| MSTRG.16423.4  | 4109  | coding    | PF05033 |
| MSTRG.16423.2  | 3173  | coding    | PF05033 |
| MSTRG.16423.3  | 2705  | noncoding | —       |
| MSTRG.16423.5  | 7208  | coding    | PF05033 |
| MSTRG.16423.7  | 2998  | coding    | PF05033 |
| MSTRG.16423.8  | 4429  | coding    | PF05033 |
| MSTRG.16423.10 | 4919  | coding    | PF13771 |
| MSTRG.16423.12 | 3748  | coding    | PF13771 |
| MSTRG.16425.2  | 5988  | noncoding | —       |
| MSTRG.16425.1  | 6193  | coding    | PF00415 |
| MSTRG.16425.3  | 11317 | coding    | PF00415 |
| MSTRG.16425.9  | 2839  | coding    | PF00415 |
| MSTRG.16425.10 | 2054  | coding    | PF00415 |
| MSTRG.16427.1  | 741   | noncoding | —       |
| MSTRG.16417.1  | 497   | noncoding | —       |
| MSTRG.16429.2  | 507   | noncoding | —       |
| MSTRG.16431.3  | 2022  | noncoding | —       |
| MSTRG.16431.4  | 1844  | noncoding | —       |
| MSTRG.16470.1  | 7901  | noncoding | —       |
| MSTRG.16472.1  | 3431  | noncoding | —       |
| MSTRG.16473.2  | 893   | noncoding | —       |
| MSTRG.16446.1  | 433   | noncoding | —       |
| MSTRG.16448.5  | 2791  | noncoding | —       |
| MSTRG.16448.6  | 1617  | noncoding | —       |
| MSTRG.16448.2  | 2030  | noncoding | —       |
| MSTRG.16448.4  | 2037  | noncoding | —       |
| MSTRG.16448.8  | 11671 | noncoding | —       |
| MSTRG.16448.9  | 8833  | noncoding | —       |
| MSTRG.16452.3  | 6509  | coding    | PF00122 |
| MSTRG.16452.5  | 6194  | coding    | PF00122 |
| MSTRG.16452.6  | 6928  | coding    | PF00122 |
| MSTRG.16453.2  | 4004  | coding    | PF15924 |
| MSTRG.16457.1  | 4206  | coding    | PF04157 |
| MSTRG.16461.2  | 1098  | coding    | PF15433 |
| MSTRG.16463.2  | 2908  | coding    | PF16675 |
| MSTRG.16463.3  | 5542  | coding    | PF16675 |
| MSTRG.16463.4  | 5541  | coding    | PF16675 |
| MSTRG.16464.1  | 31071 | noncoding | —       |
| MSTRG.16465.1  | 1125  | noncoding | —       |
| MSTRG.16482.1  | 520   | noncoding | —       |
| MSTRG.16484.1  | 2703  | coding    | PF06419 |
| MSTRG.16486.2  | 1861  | noncoding | —       |
| MSTRG.16486.3  | 2912  | noncoding | —       |
| MSTRG.16491.1  | 1209  | coding    | PF03671 |
| MSTRG.16492.1  | 566   | noncoding | —       |
| MSTRG.16492.2  | 1406  | coding    | PF08344 |
| MSTRG.16498.7  | 2732  | coding    | PF12090 |
| MSTRG.16498.8  | 2756  | coding    | PF12090 |
| MSTRG.16498.13 | 2775  | coding    | PF12090 |
| MSTRG.16498.14 | 2879  | coding    | PF12090 |
| MSTRG.16498.15 | 2734  | coding    | PF12090 |
| MSTRG.16498.16 | 624   | noncoding | —       |
| MSTRG.16502.2  | 634   | noncoding | —       |
| MSTRG.16507.1  | 303   | noncoding | —       |

|               |       |           |         |
|---------------|-------|-----------|---------|
| MSTRG.16511.1 | 2990  | coding    | PF00134 |
| MSTRG.16511.2 | 2853  | coding    | PF00134 |
| MSTRG.16511.7 | 2158  | coding    | PF00134 |
| MSTRG.16514.1 | 2858  | coding    | PF06911 |
| MSTRG.16514.2 | 2815  | coding    | PF06911 |
| MSTRG.16515.3 | 2247  | noncoding | —       |
| MSTRG.16539.4 | 5561  | coding    | PF02138 |
| MSTRG.16539.5 | 4535  | coding    | PF02138 |
| MSTRG.16539.2 | 9155  | coding    | PF02138 |
| MSTRG.16539.6 | 10865 | coding    | PF02138 |
| MSTRG.16539.7 | 5150  | coding    | PF15787 |
| MSTRG.16542.1 | 652   | noncoding | —       |
| MSTRG.16539.8 | 4445  | coding    | PF15787 |
| MSTRG.16565.1 | 1594  | noncoding | —       |
| MSTRG.16584.1 | 1663  | noncoding | —       |
| MSTRG.16584.2 | 3099  | noncoding | —       |
| MSTRG.16516.1 | 1339  | coding    | PF08542 |
| MSTRG.16520.1 | 3030  | noncoding | —       |
| MSTRG.16535.6 | 1453  | noncoding | —       |
| MSTRG.16535.7 | 3516  | noncoding | —       |
| MSTRG.16537.1 | 4932  | noncoding | —       |
| MSTRG.16590.2 | 5784  | noncoding | —       |
| MSTRG.16590.4 | 4056  | noncoding | —       |
| MSTRG.16590.3 | 5732  | noncoding | —       |
| MSTRG.16590.6 | 4419  | noncoding | —       |
| MSTRG.16597.2 | 10377 | coding    | PF14222 |
| MSTRG.16597.3 | 1332  | noncoding | —       |
| MSTRG.16597.4 | 927   | noncoding | —       |
| MSTRG.16597.5 | 585   | noncoding | —       |
| MSTRG.16597.6 | 914   | noncoding | —       |
| MSTRG.16613.1 | 1035  | noncoding | —       |
| MSTRG.16616.1 | 9321  | noncoding | —       |
| MSTRG.16616.2 | 14762 | noncoding | —       |
| MSTRG.16616.3 | 12960 | noncoding | —       |
| MSTRG.16619.1 | 6746  | noncoding | —       |
| MSTRG.16620.1 | 16497 | coding    | PF01359 |
| MSTRG.16616.5 | 1407  | noncoding | —       |
| MSTRG.16616.6 | 2842  | noncoding | —       |
| MSTRG.16616.7 | 2342  | noncoding | —       |
| MSTRG.16616.8 | 4944  | noncoding | —       |
| MSTRG.16620.2 | 27710 | noncoding | —       |
| MSTRG.16620.3 | 41475 | noncoding | —       |
| MSTRG.16620.4 | 32042 | noncoding | —       |
| MSTRG.16620.5 | 57416 | coding    | PF01359 |
| MSTRG.16620.6 | 54571 | coding    | PF01359 |
| MSTRG.16622.1 | 3789  | noncoding | —       |
| MSTRG.16587.1 | 352   | noncoding | —       |
| MSTRG.16601.1 | 3069  | noncoding | —       |
| MSTRG.16602.1 | 5489  | noncoding | —       |
| MSTRG.16603.3 | 2137  | noncoding | —       |
| MSTRG.16603.4 | 1181  | noncoding | —       |
| MSTRG.16604.2 | 2095  | noncoding | —       |
| MSTRG.16629.2 | 2626  | coding    | PF09011 |
| MSTRG.16629.3 | 3670  | coding    | PF09011 |

|                |       |           |         |
|----------------|-------|-----------|---------|
| MSTRG.16630.1  | 8817  | noncoding | -       |
| MSTRG.16631.3  | 11110 | noncoding | -       |
| MSTRG.16629.4  | 2488  | coding    | PF09011 |
| MSTRG.16629.5  | 4245  | coding    | PF09011 |
| MSTRG.16632.1  | 219   | noncoding | -       |
| MSTRG.16642.1  | 7191  | coding    | PF13906 |
| MSTRG.16642.2  | 6532  | coding    | PF13906 |
| MSTRG.16644.1  | 3753  | noncoding | -       |
| MSTRG.16645.2  | 1179  | coding    | PF05348 |
| MSTRG.16653.5  | 2448  | noncoding | -       |
| MSTRG.16653.6  | 2391  | noncoding | -       |
| MSTRG.16653.7  | 2781  | noncoding | -       |
| MSTRG.16653.8  | 2619  | noncoding | -       |
| MSTRG.16653.9  | 2777  | noncoding | -       |
| MSTRG.16653.10 | 4163  | noncoding | -       |
| MSTRG.16654.1  | 4363  | noncoding | -       |
| MSTRG.16652.1  | 4496  | coding    | PF00595 |
| MSTRG.16660.1  | 5024  | noncoding | -       |
| MSTRG.16660.3  | 4138  | noncoding | -       |
| MSTRG.16660.4  | 2913  | noncoding | -       |
| MSTRG.16660.5  | 1499  | noncoding | -       |
| MSTRG.16665.3  | 5710  | coding    | PF00443 |
| MSTRG.16665.4  | 6272  | coding    | PF00443 |
| MSTRG.16671.5  | 855   | noncoding | -       |
| MSTRG.16672.2  | 2436  | coding    | PF13639 |
| MSTRG.16672.5  | 3562  | coding    | PF13639 |
| MSTRG.16672.7  | 2322  | coding    | PF13639 |
| MSTRG.16669.1  | 3778  | noncoding | -       |
| MSTRG.16669.2  | 3032  | noncoding | -       |
| MSTRG.16670.1  | 3962  | coding    | PF16212 |
| MSTRG.16674.1  | 6253  | noncoding | -       |
| MSTRG.16676.1  | 2031  | coding    | PF15967 |
| MSTRG.16676.3  | 3759  | coding    | PF15967 |
| MSTRG.16677.4  | 2188  | coding    | PF06602 |
| MSTRG.16677.3  | 4097  | coding    | PF06602 |
| MSTRG.16678.1  | 518   | noncoding | -       |
| MSTRG.16679.2  | 8231  | noncoding | -       |
| MSTRG.16679.1  | 1926  | noncoding | -       |
| MSTRG.16679.3  | 8541  | noncoding | -       |
| MSTRG.16679.4  | 1429  | noncoding | -       |
| MSTRG.16679.5  | 1138  | noncoding | -       |
| MSTRG.16685.2  | 5776  | coding    | PF00621 |
| MSTRG.16687.1  | 1419  | noncoding | -       |
| MSTRG.16684.1  | 960   | noncoding | -       |
| MSTRG.16691.1  | 2010  | noncoding | -       |
| MSTRG.16694.5  | 3508  | noncoding | -       |
| MSTRG.16692.1  | 384   | coding    | PF00167 |
| MSTRG.16693.1  | 555   | noncoding | -       |
| MSTRG.16702.1  | 10870 | noncoding | -       |
| MSTRG.16702.4  | 2394  | noncoding | -       |
| MSTRG.16702.5  | 832   | noncoding | -       |
| MSTRG.16704.3  | 547   | noncoding | -       |
| MSTRG.16702.10 | 3850  | coding    | PF01529 |
| MSTRG.16702.12 | 4665  | coding    | PF01529 |

|                  |       |           |         |
|------------------|-------|-----------|---------|
| MSTRG. 16702. 13 | 3731  | noncoding | -       |
| MSTRG. 16709. 4  | 7931  | coding    | PF00069 |
| MSTRG. 16709. 7  | 3733  | noncoding | -       |
| MSTRG. 16696. 4  | 9618  | coding    | PF10237 |
| MSTRG. 16712. 1  | 10394 | coding    | PF12012 |
| MSTRG. 16712. 2  | 10017 | coding    | PF12012 |
| MSTRG. 16712. 3  | 8223  | coding    | PF12012 |
| MSTRG. 16712. 5  | 9483  | coding    | PF12012 |
| MSTRG. 16712. 4  | 6568  | coding    | PF12012 |
| MSTRG. 16712. 6  | 5869  | coding    | PF12012 |
| MSTRG. 16712. 7  | 6109  | coding    | PF12012 |
| MSTRG. 16712. 8  | 4884  | coding    | PF12012 |
| MSTRG. 16712. 9  | 4579  | coding    | PF12012 |
| MSTRG. 16712. 10 | 4694  | coding    | PF12012 |
| MSTRG. 16712. 11 | 3670  | noncoding | -       |
| MSTRG. 16713. 1  | 2620  | coding    | PF00076 |
| MSTRG. 16713. 2  | 3174  | coding    | PF08075 |
| MSTRG. 16713. 4  | 2642  | noncoding | -       |
| MSTRG. 16713. 11 | 13666 | coding    | PF08075 |
| MSTRG. 16719. 2  | 6215  | coding    | PF08487 |
| MSTRG. 16722. 1  | 5600  | coding    | PF00567 |
| MSTRG. 16722. 2  | 5255  | coding    | PF00567 |
| MSTRG. 16722. 3  | 5138  | coding    | PF00567 |
| MSTRG. 16722. 5  | 6550  | coding    | PF00567 |
| MSTRG. 16722. 6  | 6850  | coding    | PF00567 |
| MSTRG. 16726. 1  | 1249  | noncoding | -       |
| MSTRG. 16733. 1  | 1337  | noncoding | -       |
| MSTRG. 16733. 3  | 1023  | noncoding | -       |
| MSTRG. 16745. 1  | 561   | noncoding | -       |
| MSTRG. 16747. 1  | 497   | noncoding | -       |
| MSTRG. 16754. 2  | 2039  | coding    | PF12554 |
| MSTRG. 16757. 3  | 2735  | noncoding | -       |
| MSTRG. 16757. 4  | 3088  | noncoding | -       |
| MSTRG. 16748. 2  | 2837  | noncoding | -       |
| MSTRG. 16749. 1  | 274   | noncoding | -       |
| MSTRG. 16749. 2  | 335   | noncoding | -       |
| MSTRG. 16750. 1  | 691   | noncoding | -       |
| MSTRG. 16761. 3  | 1280  | noncoding | -       |
| MSTRG. 16764. 2  | 4190  | coding    | PF00566 |
| MSTRG. 16765. 1  | 2168  | noncoding | -       |
| MSTRG. 16766. 1  | 1793  | noncoding | -       |
| MSTRG. 16767. 1  | 2482  | noncoding | -       |
| MSTRG. 16769. 1  | 2486  | noncoding | -       |
| MSTRG. 16772. 2  | 4586  | coding    | PF15949 |
| MSTRG. 16772. 3  | 4650  | coding    | PF15949 |
| MSTRG. 16772. 4  | 4583  | coding    | PF15949 |
| MSTRG. 16772. 5  | 4617  | coding    | PF15949 |
| MSTRG. 16776. 1  | 530   | noncoding | -       |
| MSTRG. 16799. 10 | 6535  | noncoding | -       |
| MSTRG. 16799. 7  | 6569  | noncoding | -       |
| MSTRG. 16799. 8  | 6848  | noncoding | -       |
| MSTRG. 16799. 9  | 6895  | noncoding | -       |
| MSTRG. 16799. 3  | 7089  | noncoding | -       |
| MSTRG. 16799. 2  | 14952 | coding    | PF08005 |

|                  |       |           |         |
|------------------|-------|-----------|---------|
| MSTRG. 16799. 11 | 14652 | coding    | PF08005 |
| MSTRG. 16799. 4  | 14783 | coding    | PF08005 |
| MSTRG. 16799. 5  | 14882 | coding    | PF08005 |
| MSTRG. 16799. 1  | 14845 | coding    | PF08005 |
| MSTRG. 16801. 1  | 2241  | noncoding | —       |
| MSTRG. 16799. 12 | 4549  | noncoding | —       |
| MSTRG. 16799. 13 | 5332  | coding    | PF08005 |
| MSTRG. 16802. 1  | 1751  | noncoding | —       |
| MSTRG. 16803. 1  | 1257  | noncoding | —       |
| MSTRG. 16780. 1  | 235   | noncoding | —       |
| MSTRG. 16784. 2  | 2759  | coding    | PF15301 |
| MSTRG. 16785. 1  | 230   | noncoding | —       |
| MSTRG. 16787. 1  | 214   | noncoding | —       |
| MSTRG. 16789. 1  | 278   | noncoding | —       |
| MSTRG. 16823. 10 | 6335  | noncoding | —       |
| MSTRG. 16823. 8  | 6346  | noncoding | —       |
| MSTRG. 16823. 1  | 7000  | noncoding | —       |
| MSTRG. 16823. 5  | 6961  | noncoding | —       |
| MSTRG. 16823. 6  | 6967  | noncoding | —       |
| MSTRG. 16823. 7  | 7069  | noncoding | —       |
| MSTRG. 16823. 9  | 5832  | noncoding | —       |
| MSTRG. 16823. 2  | 6971  | noncoding | —       |
| MSTRG. 16823. 3  | 7044  | noncoding | —       |
| MSTRG. 16823. 11 | 6265  | noncoding | —       |
| MSTRG. 16823. 12 | 3149  | noncoding | —       |
| MSTRG. 16824. 1  | 873   | noncoding | —       |
| MSTRG. 16824. 2  | 1614  | noncoding | —       |
| MSTRG. 16824. 3  | 1082  | noncoding | —       |
| MSTRG. 16816. 2  | 3154  | noncoding | —       |
| MSTRG. 16816. 3  | 3156  | noncoding | —       |
| MSTRG. 16817. 1  | 2135  | noncoding | —       |
| MSTRG. 16818. 1  | 2815  | noncoding | —       |
| MSTRG. 16818. 2  | 830   | noncoding | —       |
| MSTRG. 16820. 1  | 741   | noncoding | —       |
| MSTRG. 16835. 1  | 235   | noncoding | —       |
| MSTRG. 16835. 2  | 275   | noncoding | —       |
| MSTRG. 16840. 1  | 6151  | noncoding | —       |
| MSTRG. 16847. 1  | 1001  | noncoding | —       |
| MSTRG. 16847. 2  | 484   | noncoding | —       |
| MSTRG. 16855. 1  | 641   | noncoding | —       |
| MSTRG. 16878. 1  | 337   | noncoding | —       |
| MSTRG. 16879. 1  | 237   | noncoding | —       |
| MSTRG. 16884. 1  | 1462  | noncoding | —       |
| MSTRG. 17027. 1  | 8577  | coding    | PF01153 |
| MSTRG. 17027. 4  | 12607 | coding    | PF01153 |
| MSTRG. 17027. 5  | 8911  | coding    | PF01153 |
| MSTRG. 17027. 3  | 3694  | coding    | PF01153 |
| MSTRG. 17027. 6  | 10959 | coding    | PF01153 |
| MSTRG. 17028. 1  | 3864  | noncoding | —       |
| MSTRG. 17027. 8  | 29632 | coding    | PF01153 |
| MSTRG. 17027. 12 | 5170  | coding    | PF01153 |
| MSTRG. 17027. 13 | 4339  | coding    | PF01153 |
| MSTRG. 17027. 20 | 4431  | coding    | PF01153 |
| MSTRG. 17027. 16 | 21252 | coding    | PF01153 |



|                  |       |           |         |
|------------------|-------|-----------|---------|
| MSTRG. 17027. 17 | 16054 | coding    | PF01153 |
| MSTRG. 17027. 21 | 8258  | coding    | PF01153 |
| MSTRG. 17027. 22 | 34059 | coding    | PF01153 |
| MSTRG. 17027. 23 | 4062  | noncoding | —       |
| MSTRG. 17031. 1  | 14391 | noncoding | —       |
| MSTRG. 17027. 24 | 6689  | coding    | PF01153 |
| MSTRG. 17027. 25 | 3631  | coding    | PF01153 |
| MSTRG. 17027. 26 | 19184 | noncoding | —       |
| MSTRG. 17027. 27 | 14006 | noncoding | —       |
| MSTRG. 17027. 28 | 2641  | noncoding | —       |
| MSTRG. 17033. 1  | 1679  | noncoding | —       |
| MSTRG. 17027. 29 | 9257  | noncoding | —       |
| MSTRG. 17027. 30 | 7910  | noncoding | —       |
| MSTRG. 17034. 1  | 11327 | noncoding | —       |
| MSTRG. 17035. 1  | 3445  | noncoding | —       |
| MSTRG. 17036. 1  | 12077 | noncoding | —       |
| MSTRG. 17037. 1  | 2973  | noncoding | —       |
| MSTRG. 17038. 1  | 4062  | noncoding | —       |
| MSTRG. 17039. 1  | 7025  | noncoding | —       |
| MSTRG. 17040. 1  | 2726  | noncoding | —       |
| MSTRG. 17041. 1  | 9233  | noncoding | —       |
| MSTRG. 17042. 1  | 2598  | coding    | PF00078 |
| MSTRG. 17042. 2  | 5725  | coding    | PF00078 |
| MSTRG. 17027. 31 | 4277  | noncoding | —       |
| MSTRG. 17027. 32 | 25720 | noncoding | —       |
| MSTRG. 17027. 34 | 30300 | coding    | PF00078 |
| MSTRG. 17027. 33 | 23637 | noncoding | —       |
| MSTRG. 17027. 35 | 489   | noncoding | —       |
| MSTRG. 17027. 37 | 25677 | noncoding | —       |
| MSTRG. 17027. 36 | 9163  | noncoding | —       |
| MSTRG. 17027. 38 | 12520 | coding    | PF00078 |
| MSTRG. 17027. 40 | 9537  | coding    | PF00078 |
| MSTRG. 17027. 39 | 9760  | noncoding | —       |
| MSTRG. 17027. 41 | 13188 | noncoding | —       |
| MSTRG. 17027. 42 | 7632  | noncoding | —       |
| MSTRG. 17027. 43 | 9410  | noncoding | —       |
| MSTRG. 17027. 44 | 4906  | noncoding | —       |
| MSTRG. 17044. 1  | 4513  | noncoding | —       |
| MSTRG. 17027. 45 | 9382  | noncoding | —       |
| MSTRG. 17027. 46 | 6387  | noncoding | —       |
| MSTRG. 17045. 1  | 5245  | noncoding | —       |
| MSTRG. 17046. 1  | 3780  | noncoding | —       |
| MSTRG. 17047. 1  | 12441 | noncoding | —       |
| MSTRG. 17048. 1  | 4629  | noncoding | —       |
| MSTRG. 17049. 1  | 891   | noncoding | —       |
| MSTRG. 17050. 1  | 3230  | noncoding | —       |
| MSTRG. 17051. 1  | 4105  | noncoding | —       |
| MSTRG. 16890. 1  | 3377  | coding    | PF01153 |
| MSTRG. 16890. 2  | 896   | coding    | PF01153 |
| MSTRG. 16899. 2  | 5677  | coding    | PF00005 |
| MSTRG. 16906. 1  | 3590  | coding    | PF00005 |
| MSTRG. 16906. 3  | 844   | coding    | PF00005 |
| MSTRG. 16907. 3  | 2346  | noncoding | —       |
| MSTRG. 16907. 1  | 2065  | noncoding | —       |

|               |       |           |         |
|---------------|-------|-----------|---------|
| MSTRG.16907.2 | 7217  | noncoding | -       |
| MSTRG.16907.4 | 7214  | noncoding | -       |
| MSTRG.16907.5 | 5076  | noncoding | -       |
| MSTRG.16907.6 | 5504  | noncoding | -       |
| MSTRG.16907.8 | 2481  | noncoding | -       |
| MSTRG.16907.7 | 8708  | noncoding | -       |
| MSTRG.16907.9 | 3211  | noncoding | -       |
| MSTRG.16911.1 | 1209  | noncoding | -       |
| MSTRG.16912.1 | 4070  | noncoding | -       |
| MSTRG.16915.1 | 3860  | coding    | PF00005 |
| MSTRG.16918.2 | 1088  | noncoding | -       |
| MSTRG.16918.1 | 1677  | noncoding | -       |
| MSTRG.16912.2 | 2157  | coding    | PF00005 |
| MSTRG.16912.3 | 1915  | coding    | PF00005 |
| MSTRG.16902.3 | 2260  | noncoding | -       |
| MSTRG.16902.4 | 2260  | noncoding | -       |
| MSTRG.16919.1 | 330   | noncoding | -       |
| MSTRG.16920.1 | 2288  | noncoding | -       |
| MSTRG.16922.1 | 530   | noncoding | -       |
| MSTRG.16930.6 | 3376  | coding    | PF13815 |
| MSTRG.16927.1 | 1518  | coding    | PF00001 |
| MSTRG.16928.1 | 291   | noncoding | -       |
| MSTRG.16935.7 | 2495  | noncoding | -       |
| MSTRG.16936.1 | 15963 | noncoding | -       |
| MSTRG.16935.8 | 2574  | noncoding | -       |
| MSTRG.16938.1 | 4193  | noncoding | -       |
| MSTRG.16940.1 | 2199  | coding    | PF00071 |
| MSTRG.16940.2 | 2155  | coding    | PF00071 |
| MSTRG.16940.3 | 3249  | coding    | PF00071 |
| MSTRG.16940.4 | 5668  | coding    | PF00071 |
| MSTRG.16945.1 | 8493  | noncoding | -       |
| MSTRG.16948.1 | 5733  | noncoding | -       |
| MSTRG.16949.2 | 5161  | coding    | PF00069 |
| MSTRG.16953.4 | 7369  | coding    | PF06920 |
| MSTRG.16954.1 | 2783  | noncoding | -       |
| MSTRG.16959.1 | 2474  | noncoding | -       |
| MSTRG.16959.2 | 2321  | noncoding | -       |
| MSTRG.16961.1 | 6532  | noncoding | -       |
| MSTRG.16962.1 | 827   | noncoding | -       |
| MSTRG.16965.1 | 2682  | coding    | PF03328 |
| MSTRG.16965.2 | 2402  | coding    | PF03328 |
| MSTRG.16965.4 | 3070  | noncoding | -       |
| MSTRG.16965.3 | 5265  | coding    | PF03328 |
| MSTRG.16965.5 | 3710  | coding    | PF03328 |
| MSTRG.16965.6 | 3146  | coding    | PF03328 |
| MSTRG.16965.7 | 584   | coding    | PF03328 |
| MSTRG.16966.1 | 19197 | noncoding | -       |
| MSTRG.16966.2 | 15722 | noncoding | -       |
| MSTRG.16967.1 | 1707  | noncoding | -       |
| MSTRG.16968.1 | 1441  | noncoding | -       |
| MSTRG.16963.5 | 319   | noncoding | -       |
| MSTRG.16971.1 | 2792  | coding    | PF02786 |
| MSTRG.16971.2 | 2644  | coding    | PF02786 |
| MSTRG.16971.3 | 2522  | coding    | PF02786 |

|                |       |           |         |
|----------------|-------|-----------|---------|
| MSTRG.16971.4  | 2772  | coding    | PF02786 |
| MSTRG.16971.6  | 2509  | coding    | PF02786 |
| MSTRG.16971.8  | 1895  | coding    | PF02786 |
| MSTRG.16971.10 | 2405  | coding    | PF02786 |
| MSTRG.16971.9  | 2024  | coding    | PF02786 |
| MSTRG.16973.1  | 1442  | noncoding | —       |
| MSTRG.16974.2  | 1618  | coding    | PF06094 |
| MSTRG.16974.3  | 1682  | coding    | PF06094 |
| MSTRG.16978.1  | 3960  | noncoding | —       |
| MSTRG.16978.2  | 5342  | noncoding | —       |
| MSTRG.16978.3  | 5468  | noncoding | —       |
| MSTRG.16978.4  | 5337  | noncoding | —       |
| MSTRG.16988.6  | 10549 | coding    | PF15804 |
| MSTRG.16988.4  | 26720 | coding    | PF15804 |
| MSTRG.16988.5  | 28289 | coding    | PF15804 |
| MSTRG.16988.3  | 25827 | coding    | PF15804 |
| MSTRG.16988.9  | 898   | noncoding | —       |
| MSTRG.16992.2  | 1496  | coding    | PF00867 |
| MSTRG.16996.1  | 438   | noncoding | —       |
| MSTRG.16997.1  | 649   | noncoding | —       |
| MSTRG.16997.2  | 279   | noncoding | —       |
| MSTRG.16998.1  | 2308  | noncoding | —       |
| MSTRG.16999.1  | 1187  | noncoding | —       |
| MSTRG.17005.1  | 611   | noncoding | —       |
| MSTRG.17004.6  | 826   | noncoding | —       |
| MSTRG.17004.7  | 1111  | noncoding | —       |
| MSTRG.17004.8  | 817   | noncoding | —       |
| MSTRG.17008.1  | 431   | noncoding | —       |
| MSTRG.17011.2  | 5041  | noncoding | —       |
| MSTRG.17011.3  | 1847  | noncoding | —       |
| MSTRG.17011.5  | 1162  | noncoding | —       |
| MSTRG.17012.1  | 2325  | coding    | PF02994 |
| MSTRG.17012.2  | 2195  | coding    | PF02994 |
| MSTRG.17016.1  | 689   | noncoding | —       |
| MSTRG.17053.2  | 689   | noncoding | —       |
| MSTRG.17053.1  | 649   | noncoding | —       |
| MSTRG.17054.1  | 6634  | coding    | PF00063 |
| MSTRG.17054.2  | 7205  | coding    | PF00063 |
| MSTRG.17055.1  | 1153  | noncoding | —       |
| MSTRG.17054.3  | 4543  | coding    | PF15439 |
| MSTRG.17060.1  | 655   | noncoding | —       |
| MSTRG.17061.1  | 5115  | noncoding | —       |
| MSTRG.17061.2  | 3638  | noncoding | —       |
| MSTRG.17067.1  | 753   | noncoding | —       |
| MSTRG.17067.2  | 1815  | noncoding | —       |
| MSTRG.17066.2  | 4947  | coding    | PF01413 |
| MSTRG.17069.1  | 2315  | noncoding | —       |
| MSTRG.17069.2  | 980   | noncoding | —       |
| MSTRG.17074.2  | 2302  | coding    | PF01256 |
| MSTRG.17074.4  | 2070  | coding    | PF01256 |
| MSTRG.17074.6  | 1949  | coding    | PF01256 |
| MSTRG.17076.1  | 6949  | coding    | PF01406 |
| MSTRG.17076.4  | 3056  | coding    | PF01406 |
| MSTRG.17076.6  | 2559  | coding    | PF01406 |

|               |       |           |         |
|---------------|-------|-----------|---------|
| MSTRG.17077.1 | 1310  | coding    | PF12998 |
| MSTRG.17078.5 | 7995  | noncoding | —       |
| MSTRG.17078.1 | 6902  | coding    | PF12796 |
| MSTRG.17079.1 | 9076  | noncoding | —       |
| MSTRG.17078.6 | 10917 | coding    | PF12796 |
| MSTRG.17085.2 | 3101  | noncoding | —       |
| MSTRG.17087.3 | 9597  | coding    | PF16523 |
| MSTRG.17087.4 | 5501  | coding    | PF16523 |
| MSTRG.17092.1 | 1112  | noncoding | —       |
| MSTRG.17093.1 | 1633  | noncoding | —       |
| MSTRG.17093.2 | 1943  | noncoding | —       |
| MSTRG.17093.3 | 1286  | noncoding | —       |
| MSTRG.17093.4 | 1779  | noncoding | —       |
| MSTRG.17093.5 | 1402  | noncoding | —       |
| MSTRG.17096.2 | 3780  | coding    | PF04130 |
| MSTRG.17096.3 | 3416  | coding    | PF04130 |
| MSTRG.17101.1 | 6844  | coding    | PF16212 |
| MSTRG.17105.1 | 945   | noncoding | —       |
| MSTRG.17109.4 | 1331  | coding    | PF00089 |
| MSTRG.17109.2 | 2552  | coding    | PF00089 |
| MSTRG.17109.5 | 1446  | coding    | PF00089 |
| MSTRG.17111.3 | 1498  | noncoding | —       |
| MSTRG.17114.1 | 6916  | noncoding | —       |
| MSTRG.17114.2 | 2225  | noncoding | —       |
| MSTRG.17115.2 | 1606  | coding    | PF01299 |
| MSTRG.17110.3 | 5070  | noncoding | —       |
| MSTRG.17110.1 | 1922  | noncoding | —       |
| MSTRG.17110.2 | 2993  | noncoding | —       |
| MSTRG.17110.4 | 4562  | noncoding | —       |
| MSTRG.17110.5 | 4742  | noncoding | —       |
| MSTRG.17110.6 | 4790  | noncoding | —       |
| MSTRG.17116.1 | 2653  | coding    | PF03556 |
| MSTRG.17117.1 | 2720  | noncoding | —       |
| MSTRG.17117.3 | 2669  | noncoding | —       |
| MSTRG.17119.2 | 2395  | coding    | PF08781 |
| MSTRG.17119.3 | 2377  | coding    | PF08781 |
| MSTRG.17119.5 | 2408  | coding    | PF08781 |
| MSTRG.17131.1 | 1620  | noncoding | —       |
| MSTRG.17138.2 | 1334  | noncoding | —       |
| MSTRG.17138.3 | 7216  | noncoding | —       |
| MSTRG.17138.4 | 7567  | noncoding | —       |
| MSTRG.17138.6 | 5902  | noncoding | —       |
| MSTRG.17140.2 | 1720  | noncoding | —       |
| MSTRG.17134.1 | 5919  | noncoding | —       |
| MSTRG.17134.2 | 5079  | noncoding | —       |
| MSTRG.17145.1 | 327   | noncoding | —       |
| MSTRG.17150.1 | 722   | noncoding | —       |
| MSTRG.17150.2 | 777   | noncoding | —       |
| MSTRG.17151.4 | 2852  | coding    | PF12796 |
| MSTRG.17152.2 | 1136  | noncoding | —       |
| MSTRG.17155.1 | 7438  | coding    | PF15744 |
| MSTRG.17155.4 | 5601  | coding    | PF15744 |
| MSTRG.17166.1 | 2655  | noncoding | —       |
| MSTRG.17166.2 | 455   | noncoding | —       |

|                |       |           |         |
|----------------|-------|-----------|---------|
| MSTRG.17168.2  | 4240  | noncoding | -       |
| MSTRG.17168.3  | 25115 | coding    | PF08005 |
| MSTRG.17158.1  | 533   | noncoding | -       |
| MSTRG.17172.2  | 1249  | noncoding | -       |
| MSTRG.17172.3  | 1394  | noncoding | -       |
| MSTRG.17192.2  | 2081  | noncoding | -       |
| MSTRG.17192.1  | 2264  | noncoding | -       |
| MSTRG.17192.3  | 2244  | noncoding | -       |
| MSTRG.17192.4  | 2736  | noncoding | -       |
| MSTRG.17193.1  | 1141  | noncoding | -       |
| MSTRG.17202.1  | 4118  | noncoding | -       |
| MSTRG.17207.1  | 1630  | noncoding | -       |
| MSTRG.17215.2  | 2253  | noncoding | -       |
| MSTRG.17225.1  | 836   | noncoding | -       |
| MSTRG.17175.1  | 452   | noncoding | -       |
| MSTRG.17175.2  | 612   | noncoding | -       |
| MSTRG.17176.1  | 264   | noncoding | -       |
| MSTRG.17177.4  | 6506  | coding    | PF00787 |
| MSTRG.17177.3  | 3848  | coding    | PF00787 |
| MSTRG.17177.2  | 5033  | coding    | PF00225 |
| MSTRG.17177.5  | 4046  | coding    | PF00787 |
| MSTRG.17177.6  | 3934  | coding    | PF00787 |
| MSTRG.17178.1  | 3289  | noncoding | -       |
| MSTRG.17178.2  | 2137  | noncoding | -       |
| MSTRG.17177.7  | 2364  | coding    | PF00225 |
| MSTRG.17179.1  | 2931  | noncoding | -       |
| MSTRG.17180.1  | 1053  | noncoding | -       |
| MSTRG.17398.2  | 1113  | noncoding | -       |
| MSTRG.17399.1  | 660   | noncoding | -       |
| MSTRG.17400.1  | 1615  | noncoding | -       |
| MSTRG.17401.1  | 526   | noncoding | -       |
| MSTRG.17402.1  | 4223  | coding    | PF14915 |
| MSTRG.17402.2  | 1441  | noncoding | -       |
| MSTRG.17402.3  | 2095  | noncoding | -       |
| MSTRG.17402.5  | 521   | noncoding | -       |
| MSTRG.17402.6  | 561   | noncoding | -       |
| MSTRG.17402.11 | 7397  | coding    | PF12001 |
| MSTRG.17403.1  | 1793  | noncoding | -       |
| MSTRG.17402.13 | 4354  | noncoding | -       |
| MSTRG.17405.1  | 4446  | noncoding | -       |
| MSTRG.17402.14 | 3957  | noncoding | -       |
| MSTRG.17402.15 | 3766  | noncoding | -       |
| MSTRG.17402.16 | 5070  | noncoding | -       |
| MSTRG.17402.19 | 4523  | coding    | PF14915 |
| MSTRG.17402.17 | 1924  | coding    | PF12796 |
| MSTRG.17402.20 | 3383  | coding    | PF12796 |
| MSTRG.17402.21 | 2352  | coding    | PF12796 |
| MSTRG.17402.24 | 5554  | coding    | PF14915 |
| MSTRG.17402.23 | 2102  | coding    | PF12796 |
| MSTRG.17402.25 | 1609  | coding    | PF12796 |
| MSTRG.17402.29 | 2620  | coding    | PF12796 |
| MSTRG.17402.27 | 3627  | coding    | PF14915 |
| MSTRG.17402.31 | 2522  | coding    | PF12796 |
| MSTRG.17402.32 | 2185  | coding    | PF12796 |

|                |       |           |         |
|----------------|-------|-----------|---------|
| MSTRG.17406.1  | 1355  | noncoding | -       |
| MSTRG.17407.1  | 949   | coding    | PF12796 |
| MSTRG.17402.34 | 2573  | noncoding | -       |
| MSTRG.17402.35 | 1134  | noncoding | -       |
| MSTRG.17402.36 | 1765  | noncoding | -       |
| MSTRG.17402.37 | 3091  | coding    | PF14915 |
| MSTRG.17408.1  | 1769  | noncoding | -       |
| MSTRG.17409.1  | 1938  | noncoding | -       |
| MSTRG.17409.2  | 1877  | noncoding | -       |
| MSTRG.17409.3  | 1878  | noncoding | -       |
| MSTRG.17410.1  | 329   | noncoding | -       |
| MSTRG.17411.1  | 1032  | noncoding | -       |
| MSTRG.17412.1  | 1498  | noncoding | -       |
| MSTRG.17413.1  | 3384  | coding    | PF12001 |
| MSTRG.17414.1  | 601   | noncoding | -       |
| MSTRG.17402.38 | 2384  | noncoding | -       |
| MSTRG.17415.1  | 1624  | noncoding | -       |
| MSTRG.17416.1  | 802   | noncoding | -       |
| MSTRG.17417.1  | 1231  | noncoding | -       |
| MSTRG.17407.2  | 2330  | coding    | PF12796 |
| MSTRG.17407.3  | 5402  | coding    | PF12796 |
| MSTRG.17407.4  | 1409  | coding    | PF12796 |
| MSTRG.17418.1  | 367   | noncoding | -       |
| MSTRG.17419.1  | 967   | noncoding | -       |
| MSTRG.17420.1  | 1153  | noncoding | -       |
| MSTRG.17421.2  | 1556  | coding    | PF12796 |
| MSTRG.17421.4  | 828   | coding    | PF12796 |
| MSTRG.17422.1  | 1978  | noncoding | -       |
| MSTRG.17400.2  | 917   | noncoding | -       |
| MSTRG.17402.68 | 2486  | noncoding | -       |
| MSTRG.17402.75 | 3134  | coding    | PF14915 |
| MSTRG.17402.77 | 911   | coding    | PF12001 |
| MSTRG.17424.1  | 1125  | coding    | PF12001 |
| MSTRG.17407.10 | 4360  | coding    | PF14915 |
| MSTRG.17407.12 | 4588  | coding    | PF14915 |
| MSTRG.17428.1  | 573   | noncoding | -       |
| MSTRG.17421.5  | 1331  | coding    | PF12001 |
| MSTRG.17432.1  | 359   | noncoding | -       |
| MSTRG.17421.13 | 2442  | coding    | PF12796 |
| MSTRG.17432.2  | 884   | noncoding | -       |
| MSTRG.17187.1  | 2644  | noncoding | -       |
| MSTRG.17189.1  | 767   | noncoding | -       |
| MSTRG.17189.2  | 984   | noncoding | -       |
| MSTRG.17276.3  | 7515  | noncoding | -       |
| MSTRG.17276.4  | 21590 | noncoding | -       |
| MSTRG.17276.5  | 24725 | noncoding | -       |
| MSTRG.17276.6  | 7615  | noncoding | -       |
| MSTRG.17276.7  | 838   | noncoding | -       |
| MSTRG.17278.1  | 1138  | noncoding | -       |
| MSTRG.17278.3  | 1260  | noncoding | -       |
| MSTRG.17278.2  | 1313  | noncoding | -       |
| MSTRG.17278.4  | 1124  | noncoding | -       |
| MSTRG.17279.4  | 4243  | noncoding | -       |
| MSTRG.17279.3  | 1760  | noncoding | -       |

|                |       |           |         |
|----------------|-------|-----------|---------|
| MSTRG.17280.5  | 2560  | coding    | PF16870 |
| MSTRG.17280.4  | 2539  | coding    | PF16870 |
| MSTRG.17190.1  | 5497  | coding    | PF04050 |
| MSTRG.17263.3  | 4501  | noncoding | —       |
| MSTRG.17264.1  | 10507 | noncoding | —       |
| MSTRG.17264.2  | 4658  | noncoding | —       |
| MSTRG.17265.1  | 1006  | noncoding | —       |
| MSTRG.17266.1  | 9552  | coding    | PF00378 |
| MSTRG.17266.3  | 3855  | coding    | PF00378 |
| MSTRG.17266.5  | 9174  | coding    | PF00378 |
| MSTRG.17266.6  | 7004  | coding    | PF00378 |
| MSTRG.17191.1  | 923   | noncoding | —       |
| MSTRG.17270.1  | 3909  | noncoding | —       |
| MSTRG.17269.4  | 3265  | coding    | PF00566 |
| MSTRG.17271.1  | 3071  | noncoding | —       |
| MSTRG.17292.1  | 981   | noncoding | —       |
| MSTRG.17292.2  | 247   | noncoding | —       |
| MSTRG.17294.1  | 8155  | coding    | PF00076 |
| MSTRG.17294.2  | 7907  | coding    | PF00076 |
| MSTRG.17294.3  | 17591 | coding    | PF00076 |
| MSTRG.17294.5  | 14128 | coding    | PF00076 |
| MSTRG.17294.4  | 2476  | coding    | PF00076 |
| MSTRG.17294.6  | 3206  | coding    | PF00076 |
| MSTRG.17294.7  | 10861 | noncoding | —       |
| MSTRG.17294.9  | 9252  | noncoding | —       |
| MSTRG.17294.8  | 9899  | coding    | PF00076 |
| MSTRG.17294.10 | 3553  | coding    | PF00076 |
| MSTRG.17294.12 | 2607  | noncoding | —       |
| MSTRG.17294.13 | 39055 | noncoding | —       |
| MSTRG.17294.14 | 28328 | noncoding | —       |
| MSTRG.17291.1  | 244   | noncoding | —       |
| MSTRG.17299.2  | 5653  | coding    | PF00628 |
| MSTRG.17299.3  | 7009  | noncoding | —       |
| MSTRG.17301.3  | 1773  | coding    | PF00231 |
| MSTRG.17297.2  | 2485  | coding    | PF06668 |
| MSTRG.17307.1  | 1119  | noncoding | —       |
| MSTRG.17308.3  | 7334  | coding    | PF12140 |
| MSTRG.17308.6  | 7125  | coding    | PF12140 |
| MSTRG.17304.1  | 371   | noncoding | —       |
| MSTRG.17306.1  | 548   | noncoding | —       |
| MSTRG.17309.2  | 3072  | coding    | PF00069 |
| MSTRG.17310.1  | 291   | noncoding | —       |
| MSTRG.17310.2  | 378   | noncoding | —       |
| MSTRG.17311.2  | 3731  | coding    | PF01591 |
| MSTRG.17313.1  | 1678  | noncoding | —       |
| MSTRG.17313.2  | 523   | noncoding | —       |
| MSTRG.17315.2  | 1581  | noncoding | —       |
| MSTRG.17326.3  | 3877  | coding    | PF12796 |
| MSTRG.17329.1  | 9366  | coding    | PF01434 |
| MSTRG.17333.3  | 4116  | coding    | PF00348 |
| MSTRG.17333.2  | 1500  | coding    | PF00348 |
| MSTRG.17334.2  | 1923  | coding    | PF02696 |
| MSTRG.17337.1  | 5598  | coding    | PF00078 |
| MSTRG.17339.1  | 373   | noncoding | —       |

|                |       |           |         |
|----------------|-------|-----------|---------|
| MSTRG.17336.6  | 639   | noncoding | -       |
| MSTRG.17336.7  | 571   | noncoding | -       |
| MSTRG.17340.1  | 1492  | noncoding | -       |
| MSTRG.17341.2  | 2411  | coding    | PF02173 |
| MSTRG.17341.6  | 1820  | coding    | PF02173 |
| MSTRG.17343.1  | 475   | noncoding | -       |
| MSTRG.17349.5  | 3610  | coding    | PF12053 |
| MSTRG.17349.4  | 3125  | coding    | PF12053 |
| MSTRG.17350.1  | 810   | noncoding | -       |
| MSTRG.17349.9  | 4173  | coding    | PF12053 |
| MSTRG.17349.12 | 2897  | coding    | PF12053 |
| MSTRG.17349.8  | 3177  | coding    | PF12053 |
| MSTRG.17349.7  | 8565  | coding    | PF12053 |
| MSTRG.17349.10 | 4099  | coding    | PF12053 |
| MSTRG.17349.11 | 3991  | coding    | PF12053 |
| MSTRG.17349.13 | 3073  | coding    | PF12053 |
| MSTRG.17349.14 | 8082  | noncoding | -       |
| MSTRG.17349.15 | 3618  | coding    | PF12053 |
| MSTRG.17351.1  | 6525  | noncoding | -       |
| MSTRG.17352.1  | 4985  | noncoding | -       |
| MSTRG.17347.1  | 509   | noncoding | -       |
| MSTRG.17348.1  | 5986  | coding    | PF00629 |
| MSTRG.17348.2  | 5735  | coding    | PF00629 |
| MSTRG.17348.4  | 5997  | coding    | PF00629 |
| MSTRG.17368.10 | 3126  | noncoding | -       |
| MSTRG.17368.1  | 5688  | coding    | PF15368 |
| MSTRG.17368.4  | 5697  | coding    | PF15368 |
| MSTRG.17368.5  | 5701  | coding    | PF15368 |
| MSTRG.17368.7  | 5463  | coding    | PF15368 |
| MSTRG.17368.12 | 5654  | coding    | PF15368 |
| MSTRG.17369.1  | 3053  | coding    | PF02994 |
| MSTRG.17368.13 | 924   | noncoding | -       |
| MSTRG.17368.14 | 4113  | coding    | PF15368 |
| MSTRG.17364.3  | 7128  | coding    | PF00025 |
| MSTRG.17366.1  | 13229 | noncoding | -       |
| MSTRG.17370.2  | 4316  | coding    | PF14604 |
| MSTRG.17371.2  | 4896  | noncoding | -       |
| MSTRG.17372.1  | 11409 | noncoding | -       |
| MSTRG.17370.3  | 8577  | noncoding | -       |
| MSTRG.17373.1  | 3423  | coding    | PF00078 |
| MSTRG.17374.1  | 6781  | noncoding | -       |
| MSTRG.17370.4  | 21768 | noncoding | -       |
| MSTRG.17370.5  | 7029  | noncoding | -       |
| MSTRG.17370.6  | 6187  | noncoding | -       |
| MSTRG.17370.7  | 4041  | noncoding | -       |
| MSTRG.17370.8  | 10424 | noncoding | -       |
| MSTRG.17370.9  | 16357 | noncoding | -       |
| MSTRG.17375.1  | 432   | noncoding | -       |
| MSTRG.17370.10 | 8216  | noncoding | -       |
| MSTRG.17379.1  | 4752  | coding    | PF13832 |
| MSTRG.17379.13 | 557   | noncoding | -       |
| MSTRG.17379.14 | 3794  | coding    | PF13832 |
| MSTRG.17379.12 | 3132  | coding    | PF13832 |
| MSTRG.17379.8  | 4913  | coding    | PF13832 |



|                  |       |           |         |
|------------------|-------|-----------|---------|
| MSTRG. 17379. 10 | 4890  | coding    | PF13832 |
| MSTRG. 17379. 11 | 4955  | coding    | PF13832 |
| MSTRG. 17379. 15 | 8009  | coding    | PF13832 |
| MSTRG. 17380. 1  | 2477  | noncoding | —       |
| MSTRG. 17381. 1  | 5431  | noncoding | —       |
| MSTRG. 17387. 2  | 857   | noncoding | —       |
| MSTRG. 17397. 1  | 423   | noncoding | —       |
| MSTRG. 17438. 3  | 2100  | noncoding | —       |
| MSTRG. 17438. 6  | 3987  | coding    | PF14381 |
| MSTRG. 17438. 7  | 3999  | coding    | PF14381 |
| MSTRG. 17438. 8  | 4050  | coding    | PF14381 |
| MSTRG. 17438. 9  | 6976  | noncoding | —       |
| MSTRG. 17438. 10 | 4136  | noncoding | —       |
| MSTRG. 17438. 11 | 2774  | noncoding | —       |
| MSTRG. 17437. 1  | 1369  | noncoding | —       |
| MSTRG. 17441. 1  | 2427  | coding    | PF02338 |
| MSTRG. 17441. 2  | 2520  | coding    | PF02338 |
| MSTRG. 17441. 3  | 578   | noncoding | —       |
| MSTRG. 17462. 1  | 9025  | noncoding | —       |
| MSTRG. 17463. 1  | 1602  | noncoding | —       |
| MSTRG. 17464. 1  | 4589  | noncoding | —       |
| MSTRG. 17464. 4  | 1364  | noncoding | —       |
| MSTRG. 17465. 1  | 3611  | coding    | PF00078 |
| MSTRG. 17467. 1  | 844   | noncoding | —       |
| MSTRG. 17469. 1  | 4920  | noncoding | —       |
| MSTRG. 17470. 1  | 5638  | noncoding | —       |
| MSTRG. 17471. 1  | 1726  | noncoding | —       |
| MSTRG. 17474. 1  | 14941 | noncoding | —       |
| MSTRG. 17475. 1  | 23732 | noncoding | —       |
| MSTRG. 17475. 2  | 17717 | noncoding | —       |
| MSTRG. 17475. 3  | 12242 | noncoding | —       |
| MSTRG. 17476. 1  | 5310  | noncoding | —       |
| MSTRG. 17477. 1  | 5403  | noncoding | —       |
| MSTRG. 17478. 1  | 1991  | noncoding | —       |
| MSTRG. 17464. 12 | 5907  | noncoding | —       |
| MSTRG. 17464. 11 | 5710  | noncoding | —       |
| MSTRG. 17464. 10 | 6933  | noncoding | —       |
| MSTRG. 17464. 14 | 9797  | noncoding | —       |
| MSTRG. 17464. 16 | 7265  | noncoding | —       |
| MSTRG. 17480. 1  | 999   | noncoding | —       |
| MSTRG. 17481. 1  | 7196  | coding    | PF00620 |
| MSTRG. 17481. 4  | 7380  | coding    | PF00620 |
| MSTRG. 17481. 5  | 7173  | coding    | PF00620 |
| MSTRG. 17481. 7  | 7356  | coding    | PF00620 |
| MSTRG. 17481. 6  | 7035  | coding    | PF00620 |
| MSTRG. 17446. 1  | 1393  | noncoding | —       |
| MSTRG. 17450. 1  | 5202  | coding    | PF00063 |
| MSTRG. 17454. 1  | 2662  | coding    | PF11577 |
| MSTRG. 17454. 3  | 1951  | coding    | PF11577 |
| MSTRG. 17456. 2  | 4339  | coding    | PF09332 |
| MSTRG. 17456. 3  | 4257  | coding    | PF09332 |
| MSTRG. 17456. 4  | 4236  | coding    | PF09332 |
| MSTRG. 17456. 5  | 4601  | coding    | PF09332 |
| MSTRG. 17453. 2  | 1307  | noncoding | —       |

|                |       |           |         |
|----------------|-------|-----------|---------|
| MSTRG.17458.3  | 1811  | noncoding | -       |
| MSTRG.17524.1  | 5416  | noncoding | -       |
| MSTRG.17528.1  | 7166  | coding    | PF11819 |
| MSTRG.17528.3  | 4806  | coding    | PF11819 |
| MSTRG.17528.2  | 4868  | coding    | PF11819 |
| MSTRG.17528.5  | 6189  | coding    | PF11819 |
| MSTRG.17529.1  | 360   | noncoding | -       |
| MSTRG.17530.1  | 2404  | noncoding | -       |
| MSTRG.17531.1  | 1186  | noncoding | -       |
| MSTRG.17528.6  | 24162 | noncoding | -       |
| MSTRG.17528.7  | 7345  | noncoding | -       |
| MSTRG.17528.8  | 25791 | noncoding | -       |
| MSTRG.17528.9  | 8147  | noncoding | -       |
| MSTRG.17532.1  | 28868 | noncoding | -       |
| MSTRG.17532.2  | 5147  | noncoding | -       |
| MSTRG.17532.3  | 14815 | noncoding | -       |
| MSTRG.17528.10 | 1951  | noncoding | -       |
| MSTRG.17528.11 | 10849 | noncoding | -       |
| MSTRG.17533.1  | 1735  | noncoding | -       |
| MSTRG.17528.12 | 15584 | noncoding | -       |
| MSTRG.17528.13 | 22038 | noncoding | -       |
| MSTRG.17528.14 | 13416 | noncoding | -       |
| MSTRG.17528.15 | 6427  | noncoding | -       |
| MSTRG.17528.16 | 6429  | noncoding | -       |
| MSTRG.17528.17 | 6569  | noncoding | -       |
| MSTRG.17528.18 | 10562 | noncoding | -       |
| MSTRG.17535.1  | 898   | noncoding | -       |
| MSTRG.17528.19 | 2178  | noncoding | -       |
| MSTRG.17528.20 | 851   | noncoding | -       |
| MSTRG.17536.1  | 2804  | noncoding | -       |
| MSTRG.17528.21 | 3855  | noncoding | -       |
| MSTRG.17459.2  | 1531  | coding    | PF06625 |
| MSTRG.17482.3  | 7118  | noncoding | -       |
| MSTRG.17482.4  | 7131  | noncoding | -       |
| MSTRG.17490.2  | 1817  | coding    | PF00012 |
| MSTRG.17490.5  | 4306  | coding    | PF00012 |
| MSTRG.17490.4  | 5795  | coding    | PF00012 |
| MSTRG.17460.3  | 796   | coding    | PF15163 |
| MSTRG.17496.2  | 1106  | noncoding | -       |
| MSTRG.17498.2  | 2787  | coding    | PF01233 |
| MSTRG.17498.3  | 2837  | coding    | PF01233 |
| MSTRG.17539.1  | 10376 | coding    | PF00431 |
| MSTRG.17539.2  | 4081  | coding    | PF00431 |
| MSTRG.17541.1  | 4622  | noncoding | -       |
| MSTRG.17541.2  | 3619  | noncoding | -       |
| MSTRG.17541.3  | 1385  | coding    | PF00145 |
| MSTRG.17541.4  | 1785  | coding    | PF00145 |
| MSTRG.17541.5  | 2168  | coding    | PF00777 |
| MSTRG.17541.6  | 2103  | coding    | PF00145 |
| MSTRG.17541.7  | 1330  | coding    | PF00777 |
| MSTRG.17546.1  | 5867  | noncoding | -       |
| MSTRG.17541.8  | 7860  | noncoding | -       |
| MSTRG.17548.1  | 1507  | noncoding | -       |
| MSTRG.17550.1  | 2906  | noncoding | -       |

|                |       |           |         |
|----------------|-------|-----------|---------|
| MSTRG.17551.1  | 1199  | coding    | PF04387 |
| MSTRG.17551.2  | 850   | coding    | PF04387 |
| MSTRG.17552.1  | 2667  | noncoding | —       |
| MSTRG.17553.1  | 1773  | noncoding | —       |
| MSTRG.17557.1  | 5490  | coding    | PF00059 |
| MSTRG.17512.2  | 2200  | coding    | PF00625 |
| MSTRG.17515.1  | 1675  | noncoding | —       |
| MSTRG.17516.3  | 947   | noncoding | —       |
| MSTRG.17516.4  | 6225  | coding    | PF06752 |
| MSTRG.17516.5  | 10577 | coding    | PF06752 |
| MSTRG.17523.6  | 2888  | coding    | PF16618 |
| MSTRG.17523.4  | 4034  | coding    | PF16618 |
| MSTRG.17523.7  | 4029  | coding    | PF16618 |
| MSTRG.17523.5  | 3982  | coding    | PF00620 |
| MSTRG.17523.8  | 4123  | coding    | PF00620 |
| MSTRG.17559.1  | 6360  | noncoding | —       |
| MSTRG.17559.3  | 3036  | noncoding | —       |
| MSTRG.17559.4  | 4430  | noncoding | —       |
| MSTRG.17559.5  | 4745  | noncoding | —       |
| MSTRG.17559.7  | 3933  | noncoding | —       |
| MSTRG.17559.6  | 6685  | noncoding | —       |
| MSTRG.17559.8  | 2924  | noncoding | —       |
| MSTRG.17560.1  | 4495  | noncoding | —       |
| MSTRG.17560.2  | 803   | noncoding | —       |
| MSTRG.17566.3  | 5074  | coding    | PF00078 |
| MSTRG.17566.5  | 2726  | noncoding | —       |
| MSTRG.17567.1  | 2162  | noncoding | —       |
| MSTRG.17567.2  | 8673  | coding    | PF00078 |
| MSTRG.17568.1  | 5666  | noncoding | —       |
| MSTRG.17579.1  | 4300  | noncoding | —       |
| MSTRG.17580.1  | 7189  | coding    | PF02209 |
| MSTRG.17580.3  | 8912  | coding    | PF02209 |
| MSTRG.17580.2  | 6068  | coding    | PF02209 |
| MSTRG.17580.4  | 5802  | coding    | PF02209 |
| MSTRG.17580.6  | 5148  | coding    | PF02209 |
| MSTRG.17581.2  | 298   | noncoding | —       |
| MSTRG.17581.1  | 369   | noncoding | —       |
| MSTRG.17581.3  | 411   | noncoding | —       |
| MSTRG.17582.1  | 34422 | noncoding | —       |
| MSTRG.17582.2  | 7429  | noncoding | —       |
| MSTRG.17580.8  | 23800 | noncoding | —       |
| MSTRG.17580.9  | 18411 | noncoding | —       |
| MSTRG.17580.10 | 7206  | noncoding | —       |
| MSTRG.17580.11 | 17221 | noncoding | —       |
| MSTRG.17571.1  | 4414  | coding    | PF15351 |
| MSTRG.17572.1  | 1154  | noncoding | —       |
| MSTRG.17571.3  | 4495  | coding    | PF15351 |
| MSTRG.17571.4  | 4408  | coding    | PF15351 |
| MSTRG.17571.5  | 4625  | coding    | PF15351 |
| MSTRG.17575.1  | 348   | noncoding | —       |
| MSTRG.17577.1  | 774   | noncoding | —       |
| MSTRG.17577.2  | 751   | noncoding | —       |
| MSTRG.17584.1  | 2647  | noncoding | —       |
| MSTRG.17585.9  | 25985 | noncoding | —       |

|                |       |           |         |
|----------------|-------|-----------|---------|
| MSTRG.17585.8  | 5068  | noncoding | -       |
| MSTRG.17585.5  | 5003  | noncoding | -       |
| MSTRG.17585.12 | 4891  | noncoding | -       |
| MSTRG.17585.15 | 27415 | noncoding | -       |
| MSTRG.17585.16 | 31031 | noncoding | -       |
| MSTRG.17585.13 | 5062  | noncoding | -       |
| MSTRG.17585.14 | 5060  | noncoding | -       |
| MSTRG.17585.17 | 4971  | noncoding | -       |
| MSTRG.17585.18 | 5785  | noncoding | -       |
| MSTRG.17590.2  | 2677  | noncoding | -       |
| MSTRG.17590.3  | 3123  | noncoding | -       |
| MSTRG.17590.6  | 2392  | noncoding | -       |
| MSTRG.17592.1  | 5602  | noncoding | -       |
| MSTRG.17597.2  | 1688  | coding    | PF00071 |
| MSTRG.17602.1  | 695   | noncoding | -       |
| MSTRG.17615.1  | 4698  | noncoding | -       |
| MSTRG.17615.2  | 3146  | noncoding | -       |
| MSTRG.17615.15 | 3644  | coding    | PF00209 |
| MSTRG.17615.5  | 3081  | coding    | PF00209 |
| MSTRG.17615.18 | 4643  | noncoding | -       |
| MSTRG.17605.2  | 805   | coding    | PF00241 |
| MSTRG.17605.3  | 931   | coding    | PF00241 |
| MSTRG.17608.6  | 5062  | coding    | PF05104 |
| MSTRG.17608.8  | 4987  | coding    | PF05104 |
| MSTRG.17608.4  | 5039  | coding    | PF05104 |
| MSTRG.17608.5  | 5069  | coding    | PF05104 |
| MSTRG.17608.7  | 5189  | coding    | PF05104 |
| MSTRG.17608.9  | 5492  | coding    | PF05104 |
| MSTRG.17608.2  | 4870  | coding    | PF05104 |
| MSTRG.17607.1  | 1368  | noncoding | -       |
| MSTRG.17619.1  | 2660  | coding    | PF01352 |
| MSTRG.17622.1  | 5750  | noncoding | -       |
| MSTRG.17622.2  | 5436  | noncoding | -       |
| MSTRG.17619.3  | 2245  | coding    | PF01352 |
| MSTRG.17622.8  | 4604  | noncoding | -       |
| MSTRG.17622.9  | 4540  | noncoding | -       |
| MSTRG.17622.11 | 2004  | noncoding | -       |
| MSTRG.17628.2  | 2625  | coding    | PF05158 |
| MSTRG.17629.1  | 1840  | noncoding | -       |
| MSTRG.17631.2  | 2606  | coding    | PF04811 |
| MSTRG.17631.3  | 2960  | coding    | PF04811 |
| MSTRG.17631.4  | 3078  | coding    | PF04811 |
| MSTRG.17624.1  | 597   | coding    | PF14204 |
| MSTRG.17635.2  | 3593  | coding    | PF01699 |
| MSTRG.17635.1  | 3887  | coding    | PF01699 |
| MSTRG.17635.3  | 3584  | coding    | PF01699 |
| MSTRG.17636.1  | 1168  | noncoding | -       |
| MSTRG.17635.4  | 5522  | coding    | PF01699 |
| MSTRG.17635.6  | 4301  | coding    | PF01699 |
| MSTRG.17635.7  | 4301  | coding    | PF01699 |
| MSTRG.17635.9  | 3457  | coding    | PF01699 |
| MSTRG.17635.10 | 886   | noncoding | -       |
| MSTRG.17638.1  | 7044  | noncoding | -       |
| MSTRG.17639.1  | 11009 | noncoding | -       |

|                |       |           |         |
|----------------|-------|-----------|---------|
| MSTRG.17640.1  | 1131  | noncoding | -       |
| MSTRG.17641.1  | 2221  | noncoding | -       |
| MSTRG.17635.12 | 10059 | coding    | PF00078 |
| MSTRG.17632.2  | 4545  | coding    | PF02204 |
| MSTRG.17632.3  | 4385  | coding    | PF02204 |
| MSTRG.17643.2  | 807   | noncoding | -       |
| MSTRG.17643.3  | 812   | noncoding | -       |
| MSTRG.17645.3  | 4204  | coding    | PF16092 |
| MSTRG.17645.7  | 7376  | coding    | PF16092 |
| MSTRG.17647.1  | 22062 | coding    | PF02145 |
| MSTRG.17647.2  | 9160  | coding    | PF02145 |
| MSTRG.17647.3  | 14478 | coding    | PF02145 |
| MSTRG.17647.4  | 12912 | coding    | PF02145 |
| MSTRG.17648.2  | 2303  | noncoding | -       |
| MSTRG.17653.1  | 974   | noncoding | -       |
| MSTRG.17654.1  | 2207  | noncoding | -       |
| MSTRG.17660.1  | 6360  | coding    | PF14938 |
| MSTRG.17661.3  | 741   | coding    | PF00031 |
| MSTRG.17661.4  | 656   | coding    | PF00031 |
| MSTRG.17663.2  | 787   | noncoding | -       |
| MSTRG.17665.2  | 428   | noncoding | -       |
| MSTRG.17667.2  | 945   | noncoding | -       |
| MSTRG.17669.1  | 364   | noncoding | -       |
| MSTRG.17670.1  | 451   | noncoding | -       |
| MSTRG.17672.1  | 254   | noncoding | -       |
| MSTRG.17674.2  | 1335  | noncoding | -       |
| MSTRG.17674.1  | 1463  | noncoding | -       |
| MSTRG.17674.3  | 1484  | noncoding | -       |
| MSTRG.17677.1  | 2821  | coding    | PF03088 |
| MSTRG.17677.3  | 2807  | coding    | PF03088 |
| MSTRG.17679.2  | 3204  | coding    | PF13193 |
| MSTRG.17676.2  | 1758  | noncoding | -       |
| MSTRG.17681.1  | 2375  | noncoding | -       |
| MSTRG.17681.3  | 2640  | noncoding | -       |
| MSTRG.17682.2  | 2322  | coding    | PF00343 |
| MSTRG.17685.2  | 1775  | noncoding | -       |
| MSTRG.17686.1  | 1293  | noncoding | -       |
| MSTRG.17706.6  | 9190  | coding    | PF12509 |
| MSTRG.17706.4  | 11920 | coding    | PF12509 |
| MSTRG.17706.5  | 9639  | coding    | PF12509 |
| MSTRG.17706.8  | 9576  | coding    | PF12509 |
| MSTRG.17706.7  | 9548  | coding    | PF12509 |
| MSTRG.17706.9  | 10220 | coding    | PF12509 |
| MSTRG.17706.12 | 20361 | coding    | PF12509 |
| MSTRG.17706.14 | 9367  | coding    | PF12509 |
| MSTRG.17706.11 | 9481  | coding    | PF12509 |
| MSTRG.17706.10 | 9257  | coding    | PF12509 |
| MSTRG.17706.16 | 9270  | coding    | PF12509 |
| MSTRG.17706.18 | 10450 | coding    | PF12509 |
| MSTRG.17706.17 | 9399  | coding    | PF12509 |
| MSTRG.17706.19 | 8957  | coding    | PF12509 |
| MSTRG.17706.20 | 9326  | coding    | PF12509 |
| MSTRG.17706.22 | 4089  | coding    | PF12509 |
| MSTRG.17706.23 | 2798  | coding    | PF00078 |

|                |       |           |         |
|----------------|-------|-----------|---------|
| MSTRG.17695.1  | 2371  | noncoding | -       |
| MSTRG.17697.1  | 1186  | noncoding | -       |
| MSTRG.17698.2  | 2129  | noncoding | -       |
| MSTRG.17698.3  | 1586  | noncoding | -       |
| MSTRG.17701.2  | 3349  | noncoding | -       |
| MSTRG.17702.1  | 233   | noncoding | -       |
| MSTRG.17710.3  | 5568  | coding    | PF08367 |
| MSTRG.17710.4  | 5565  | coding    | PF08367 |
| MSTRG.17710.6  | 3429  | coding    | PF08367 |
| MSTRG.17711.4  | 551   | noncoding | -       |
| MSTRG.17711.2  | 3141  | coding    | PF00365 |
| MSTRG.17709.1  | 426   | noncoding | -       |
| MSTRG.17714.1  | 11364 | noncoding | -       |
| MSTRG.17714.4  | 3736  | noncoding | -       |
| MSTRG.17718.2  | 5521  | coding    | PF05383 |
| MSTRG.17718.3  | 2556  | noncoding | -       |
| MSTRG.17730.1  | 2805  | noncoding | -       |
| MSTRG.17731.1  | 5834  | noncoding | -       |
| MSTRG.17731.2  | 1382  | noncoding | -       |
| MSTRG.17729.6  | 16185 | noncoding | -       |
| MSTRG.17729.4  | 8215  | noncoding | -       |
| MSTRG.17729.5  | 8383  | noncoding | -       |
| MSTRG.17729.7  | 4651  | noncoding | -       |
| MSTRG.17729.8  | 4994  | noncoding | -       |
| MSTRG.17729.9  | 7939  | noncoding | -       |
| MSTRG.17732.1  | 7373  | noncoding | -       |
| MSTRG.17729.10 | 4150  | noncoding | -       |
| MSTRG.17733.7  | 4345  | noncoding | -       |
| MSTRG.17733.10 | 4276  | noncoding | -       |
| MSTRG.17733.12 | 2656  | noncoding | -       |
| MSTRG.17733.11 | 2339  | noncoding | -       |
| MSTRG.17725.2  | 3323  | coding    | PF00377 |
| MSTRG.17728.1  | 392   | noncoding | -       |
| MSTRG.17735.2  | 1628  | noncoding | -       |
| MSTRG.17740.2  | 1671  | coding    | PF01148 |
| MSTRG.17741.4  | 2029  | noncoding | -       |
| MSTRG.17741.5  | 2679  | coding    | PF03009 |
| MSTRG.17741.6  | 4608  | noncoding | -       |
| MSTRG.17744.1  | 352   | noncoding | -       |
| MSTRG.17751.2  | 1651  | coding    | PF04189 |
| MSTRG.17755.2  | 1671  | noncoding | -       |
| MSTRG.17755.3  | 1682  | noncoding | -       |
| MSTRG.17747.1  | 1166  | noncoding | -       |
| MSTRG.17762.1  | 355   | noncoding | -       |
| MSTRG.17775.2  | 5884  | coding    | PF13639 |
| MSTRG.17776.2  | 7123  | coding    | PF03630 |
| MSTRG.17779.1  | 32600 | noncoding | -       |
| MSTRG.17779.2  | 14939 | noncoding | -       |
| MSTRG.17779.4  | 23835 | noncoding | -       |
| MSTRG.17779.5  | 19781 | noncoding | -       |
| MSTRG.17779.10 | 18157 | noncoding | -       |
| MSTRG.17779.11 | 13056 | noncoding | -       |
| MSTRG.17768.1  | 2757  | coding    | PF09026 |
| MSTRG.17769.3  | 1113  | coding    | PF06294 |

|               |       |           |         |
|---------------|-------|-----------|---------|
| MSTRG.17770.2 | 1669  | coding    | PF15006 |
| MSTRG.17770.3 | 1223  | coding    | PF15006 |
| MSTRG.17773.1 | 7413  | noncoding | -       |
| MSTRG.17773.2 | 8526  | coding    | PF00059 |
| MSTRG.17773.3 | 15590 | coding    | PF01597 |
| MSTRG.17774.1 | 680   | noncoding | -       |
| MSTRG.17781.2 | 7335  | noncoding | -       |
| MSTRG.17781.3 | 12244 | noncoding | -       |
| MSTRG.17782.1 | 4346  | noncoding | -       |
| MSTRG.17784.3 | 3105  | coding    | PF00955 |
| MSTRG.17785.2 | 1563  | coding    | PF01725 |
| MSTRG.17785.3 | 3156  | coding    | PF00078 |
| MSTRG.17789.1 | 2368  | coding    | PF04564 |
| MSTRG.17789.4 | 2458  | coding    | PF04564 |
| MSTRG.17789.6 | 2284  | coding    | PF04564 |
| MSTRG.17791.6 | 3349  | coding    | PF00102 |
| MSTRG.17791.5 | 3492  | coding    | PF00102 |
| MSTRG.17791.4 | 3254  | coding    | PF00102 |
| MSTRG.17792.1 | 4311  | noncoding | -       |
| MSTRG.17796.2 | 3120  | coding    | PF04841 |
| MSTRG.17794.1 | 2798  | coding    | PF00246 |
| MSTRG.17802.1 | 861   | coding    | PF00927 |
| MSTRG.17807.1 | 4269  | coding    | PF07654 |
| MSTRG.17806.1 | 622   | noncoding | -       |
| MSTRG.17814.1 | 1447  | noncoding | -       |
| MSTRG.17814.2 | 14620 | coding    | PF02093 |
| MSTRG.17816.1 | 2592  | noncoding | -       |
| MSTRG.17814.6 | 3749  | noncoding | -       |
| MSTRG.17814.4 | 3623  | noncoding | -       |
| MSTRG.17814.5 | 3761  | noncoding | -       |
| MSTRG.17817.2 | 1204  | noncoding | -       |
| MSTRG.17817.1 | 1151  | noncoding | -       |
| MSTRG.17817.3 | 1313  | noncoding | -       |
| MSTRG.17810.2 | 3128  | coding    | PF00001 |
| MSTRG.17811.3 | 1406  | coding    | PF15478 |
| MSTRG.17825.4 | 5991  | noncoding | -       |
| MSTRG.17826.4 | 1719  | coding    | PF14681 |
| MSTRG.17826.3 | 1613  | coding    | PF14681 |
| MSTRG.17826.2 | 1679  | coding    | PF14681 |
| MSTRG.17826.7 | 904   | coding    | PF14681 |
| MSTRG.17826.8 | 1197  | coding    | PF14681 |
| MSTRG.17826.6 | 1071  | coding    | PF14681 |
| MSTRG.17826.9 | 958   | coding    | PF14681 |
| MSTRG.17828.6 | 6311  | coding    | PF00226 |
| MSTRG.17828.7 | 9270  | coding    | PF00226 |
| MSTRG.17828.3 | 4348  | coding    | PF00226 |
| MSTRG.17829.1 | 2377  | noncoding | -       |
| MSTRG.17830.4 | 2249  | coding    | PF04201 |
| MSTRG.17830.5 | 2246  | coding    | PF04201 |
| MSTRG.17830.6 | 4499  | coding    | PF04201 |
| MSTRG.17832.2 | 1547  | noncoding | -       |
| MSTRG.17833.1 | 284   | noncoding | -       |
| MSTRG.17835.2 | 1354  | noncoding | -       |
| MSTRG.17836.2 | 2150  | noncoding | -       |

|               |      |           |         |
|---------------|------|-----------|---------|
| MSTRG.17836.3 | 2559 | noncoding | -       |
| MSTRG.17837.3 | 1662 | coding    | PF00025 |
| MSTRG.17837.4 | 1594 | coding    | PF00025 |
| MSTRG.17839.4 | 4353 | coding    | PF06733 |
| MSTRG.17819.1 | 1708 | noncoding | -       |
| MSTRG.17821.2 | 2248 | coding    | PF01342 |
| MSTRG.17841.2 | 1937 | noncoding | -       |
| MSTRG.17841.3 | 1140 | noncoding | -       |
| MSTRG.17841.4 | 1286 | noncoding | -       |
| MSTRG.17841.5 | 2012 | noncoding | -       |
| MSTRG.17841.6 | 1361 | noncoding | -       |
| MSTRG.17842.1 | 2270 | coding    | PF07714 |
| MSTRG.17842.4 | 1432 | coding    | PF07714 |
| MSTRG.17840.1 | 1828 | coding    | PF00009 |
| MSTRG.17840.2 | 1846 | coding    | PF00009 |
| MSTRG.17845.4 | 2609 | coding    | PF01412 |
| MSTRG.17847.1 | 3200 | coding    | PF10607 |
| MSTRG.17847.3 | 1657 | coding    | PF10607 |
| MSTRG.17849.1 | 519  | noncoding | -       |
| MSTRG.17848.5 | 7882 | coding    | PF07744 |
| MSTRG.17856.1 | 1646 | coding    | PF01249 |
| MSTRG.17863.4 | 1815 | coding    | PF04683 |
| MSTRG.17863.2 | 1556 | coding    | PF04683 |
| MSTRG.17863.3 | 1796 | coding    | PF04683 |
| MSTRG.17863.5 | 1595 | coding    | PF04683 |
| MSTRG.17873.4 | 3236 | coding    | PF09532 |
| MSTRG.17873.3 | 2890 | coding    | PF12701 |
| MSTRG.17878.1 | 4346 | coding    | PF05236 |
| MSTRG.17878.2 | 4259 | coding    | PF05236 |
| MSTRG.17878.4 | 3776 | coding    | PF05236 |
| MSTRG.17878.5 | 3475 | coding    | PF05236 |
| MSTRG.17878.6 | 5275 | noncoding | -       |
| MSTRG.17879.2 | 1108 | noncoding | -       |
| MSTRG.17878.7 | 4291 | noncoding | -       |
| MSTRG.17865.1 | 653  | noncoding | -       |
| MSTRG.17866.1 | 1152 | noncoding | -       |
| MSTRG.17867.1 | 1066 | noncoding | -       |
| MSTRG.17891.1 | 3716 | coding    | PF03370 |
| MSTRG.17892.2 | 5342 | noncoding | -       |
| MSTRG.17892.3 | 3793 | noncoding | -       |
| MSTRG.17892.4 | 8565 | noncoding | -       |
| MSTRG.17892.5 | 4745 | noncoding | -       |
| MSTRG.17892.7 | 1754 | noncoding | -       |
| MSTRG.17903.1 | 425  | coding    | PF00503 |
| MSTRG.17904.6 | 1862 | coding    | PF00503 |
| MSTRG.17904.5 | 4021 | coding    | PF00503 |
| MSTRG.17904.7 | 1915 | noncoding | -       |
| MSTRG.17908.1 | 1819 | coding    | PF00071 |
| MSTRG.17906.1 | 579  | noncoding | -       |
| MSTRG.17907.2 | 1199 | coding    | PF12796 |
| MSTRG.17912.2 | 524  | coding    | PF14945 |
| MSTRG.17913.1 | 1375 | noncoding | -       |
| MSTRG.17921.1 | 2370 | noncoding | -       |
| MSTRG.17921.5 | 1862 | noncoding | -       |



|                |       |           |         |
|----------------|-------|-----------|---------|
| MSTRG.17923.1  | 1714  | coding    | PF00019 |
| MSTRG.17924.1  | 1275  | coding    | PF04406 |
| MSTRG.17923.2  | 929   | noncoding | —       |
| MSTRG.17923.3  | 1546  | coding    | PF00019 |
| MSTRG.17923.4  | 2949  | coding    | PF00019 |
| MSTRG.17923.5  | 922   | noncoding | —       |
| MSTRG.17918.1  | 1291  | noncoding | —       |
| MSTRG.17929.1  | 1545  | noncoding | —       |
| MSTRG.17919.1  | 324   | noncoding | —       |
| MSTRG.17931.1  | 1384  | coding    | PF04641 |
| MSTRG.17931.3  | 616   | noncoding | —       |
| MSTRG.17931.4  | 633   | noncoding | —       |
| MSTRG.17941.1  | 4699  | coding    | PF15290 |
| MSTRG.17942.3  | 3157  | coding    | PF04825 |
| MSTRG.17943.4  | 1133  | noncoding | —       |
| MSTRG.17943.2  | 1362  | coding    | PF11566 |
| MSTRG.17943.3  | 1740  | noncoding | —       |
| MSTRG.17954.3  | 5245  | coding    | PF00069 |
| MSTRG.17952.2  | 3239  | noncoding | —       |
| MSTRG.17958.1  | 4559  | coding    | PF15397 |
| MSTRG.17963.2  | 466   | noncoding | —       |
| MSTRG.17963.1  | 609   | noncoding | —       |
| MSTRG.17972.5  | 5681  | coding    | PF09041 |
| MSTRG.17972.7  | 5758  | coding    | PF09041 |
| MSTRG.17972.6  | 12521 | coding    | PF09041 |
| MSTRG.17972.10 | 5720  | coding    | PF09041 |
| MSTRG.17972.8  | 5646  | coding    | PF09041 |
| MSTRG.17972.9  | 5646  | coding    | PF09041 |
| MSTRG.17972.11 | 3194  | coding    | PF09041 |
| MSTRG.17973.1  | 1308  | noncoding | —       |
| MSTRG.17975.1  | 1681  | coding    | PF03133 |
| MSTRG.17978.2  | 2136  | coding    | PF07714 |
| MSTRG.17980.2  | 3925  | coding    | PF02990 |
| MSTRG.17980.3  | 5574  | coding    | PF02990 |
| MSTRG.17981.1  | 1837  | noncoding | —       |
| MSTRG.17982.2  | 3146  | noncoding | —       |
| MSTRG.17984.8  | 4842  | coding    | PF00225 |
| MSTRG.17984.7  | 5734  | coding    | PF00225 |
| MSTRG.17984.10 | 6163  | coding    | PF00225 |
| MSTRG.17985.1  | 1663  | noncoding | —       |
| MSTRG.17986.2  | 6739  | coding    | PF13919 |
| MSTRG.17987.3  | 5109  | noncoding | —       |
| MSTRG.17987.4  | 6452  | noncoding | —       |
| MSTRG.17987.5  | 7723  | noncoding | —       |
| MSTRG.17988.1  | 373   | noncoding | —       |
| MSTRG.17989.1  | 1175  | noncoding | —       |
| MSTRG.17999.2  | 13261 | noncoding | —       |
| MSTRG.17999.3  | 14482 | noncoding | —       |
| MSTRG.17999.5  | 9524  | noncoding | —       |
| MSTRG.17995.1  | 521   | noncoding | —       |
| MSTRG.17996.1  | 1033  | noncoding | —       |
| MSTRG.17998.1  | 521   | noncoding | —       |
| MSTRG.18002.1  | 817   | noncoding | —       |
| MSTRG.18015.1  | 4763  | coding    | PF15318 |

|                |      |           |         |
|----------------|------|-----------|---------|
| MSTRG.18019.1  | 1605 | noncoding | -       |
| MSTRG.18024.4  | 1835 | coding    | PF00076 |
| MSTRG.18024.9  | 2608 | coding    | PF00076 |
| MSTRG.18024.11 | 1588 | coding    | PF00076 |
| MSTRG.18024.12 | 1752 | coding    | PF00076 |
| MSTRG.18024.13 | 2059 | coding    | PF00076 |
| MSTRG.18025.1  | 3246 | noncoding | -       |
| MSTRG.18026.2  | 1724 | coding    | PF01873 |
| MSTRG.18023.2  | 2692 | coding    | PF05221 |
| MSTRG.18031.3  | 5411 | coding    | PF00632 |
| MSTRG.18031.4  | 5756 | coding    | PF00632 |
| MSTRG.18032.1  | 7259 | coding    | PF16906 |
| MSTRG.18033.1  | 5444 | noncoding | -       |
| MSTRG.18037.2  | 653  | coding    | PF02991 |
| MSTRG.18038.3  | 2078 | coding    | PF06728 |
| MSTRG.18038.2  | 1906 | coding    | PF06728 |
| MSTRG.18040.7  | 2222 | coding    | PF01359 |
| MSTRG.18040.10 | 4140 | coding    | PF13820 |
| MSTRG.18040.9  | 7359 | coding    | PF13820 |
| MSTRG.18040.12 | 6701 | coding    | PF13820 |
| MSTRG.18040.13 | 3926 | coding    | PF13820 |
| MSTRG.18040.4  | 7080 | coding    | PF13820 |
| MSTRG.18040.8  | 3856 | coding    | PF13820 |
| MSTRG.18046.1  | 874  | noncoding | -       |
| MSTRG.18050.1  | 1850 | coding    | PF03981 |
| MSTRG.18051.1  | 661  | noncoding | -       |
| MSTRG.18054.3  | 1081 | coding    | PF00777 |
| MSTRG.18052.1  | 1515 | noncoding | -       |
| MSTRG.18063.1  | 5196 | coding    | PF07002 |
| MSTRG.18063.2  | 3456 | coding    | PF07002 |
| MSTRG.18063.3  | 5092 | coding    | PF07002 |
| MSTRG.18063.5  | 5403 | noncoding | -       |
| MSTRG.18064.2  | 2219 | coding    | PF00266 |
| MSTRG.18066.7  | 3359 | coding    | PF00076 |
| MSTRG.18066.5  | 2455 | coding    | PF00076 |
| MSTRG.18066.6  | 2389 | coding    | PF00076 |
| MSTRG.18060.1  | 2199 | coding    | PF00027 |
| MSTRG.18068.1  | 5040 | noncoding | -       |
| MSTRG.18068.3  | 5133 | noncoding | -       |
| MSTRG.18068.4  | 4995 | noncoding | -       |
| MSTRG.18069.1  | 6546 | coding    | PF09380 |
| MSTRG.18069.2  | 9227 | noncoding | -       |
| MSTRG.18070.1  | 646  | noncoding | -       |
| MSTRG.18069.4  | 6966 | coding    | PF09380 |
| MSTRG.18069.5  | 6869 | coding    | PF09380 |
| MSTRG.18073.1  | 4657 | noncoding | -       |
| MSTRG.18072.2  | 2974 | coding    | PF03359 |
| MSTRG.18072.4  | 2953 | coding    | PF03359 |
| MSTRG.18072.8  | 4586 | coding    | PF03359 |
| MSTRG.18074.2  | 1398 | noncoding | -       |
| MSTRG.18093.6  | 3828 | coding    | PF03096 |
| MSTRG.18093.2  | 3481 | coding    | PF03096 |
| MSTRG.18093.4  | 2694 | coding    | PF03096 |
| MSTRG.18093.8  | 2388 | noncoding | -       |

|               |       |           |         |
|---------------|-------|-----------|---------|
| MSTRG.18095.4 | 2310  | coding    | PF08202 |
| MSTRG.18098.1 | 2587  | noncoding | —       |
| MSTRG.18099.2 | 5753  | noncoding | —       |
| MSTRG.18101.1 | 28351 | noncoding | —       |
| MSTRG.18101.2 | 12116 | noncoding | —       |
| MSTRG.18102.3 | 3086  | noncoding | —       |
| MSTRG.18103.1 | 8008  | noncoding | —       |
| MSTRG.18105.1 | 867   | noncoding | —       |
| MSTRG.18106.1 | 643   | coding    | PF05817 |
| MSTRG.18083.2 | 2053  | coding    | PF00017 |
| MSTRG.18083.3 | 24630 | noncoding | —       |
| MSTRG.18085.2 | 368   | noncoding | —       |
| MSTRG.18089.1 | 2482  | noncoding | —       |
| MSTRG.18091.3 | 1658  | noncoding | —       |
| MSTRG.18089.2 | 2104  | noncoding | —       |
| MSTRG.18122.1 | 510   | noncoding | —       |
| MSTRG.18129.1 | 5864  | coding    | PF00388 |
| MSTRG.18130.3 | 8799  | coding    | PF11569 |
| MSTRG.18130.4 | 8832  | coding    | PF11569 |
| MSTRG.18131.5 | 10597 | coding    | PF00176 |
| MSTRG.18131.4 | 9385  | coding    | PF00176 |
| MSTRG.18131.3 | 8807  | coding    | PF00176 |
| MSTRG.18131.6 | 7273  | coding    | PF00271 |
| MSTRG.18132.1 | 785   | noncoding | —       |
| MSTRG.18135.1 | 10626 | coding    | PF00102 |
| MSTRG.18137.1 | 516   | noncoding | —       |
| MSTRG.18137.2 | 566   | noncoding | —       |
| MSTRG.18138.2 | 981   | noncoding | —       |
| MSTRG.18138.1 | 1386  | noncoding | —       |
| MSTRG.18148.9 | 8654  | noncoding | —       |
| MSTRG.18149.1 | 764   | noncoding | —       |
| MSTRG.18151.1 | 3846  | noncoding | —       |
| MSTRG.18152.2 | 3924  | coding    | PF00076 |
| MSTRG.18152.3 | 2006  | coding    | PF00076 |
| MSTRG.18152.4 | 1928  | noncoding | —       |
| MSTRG.18153.1 | 5361  | coding    | PF02820 |
| MSTRG.18153.2 | 4388  | coding    | PF02820 |
| MSTRG.18142.3 | 1885  | noncoding | —       |
| MSTRG.18147.2 | 2782  | coding    | PF09316 |
| MSTRG.18140.1 | 273   | noncoding | —       |
| MSTRG.18140.2 | 291   | noncoding | —       |
| MSTRG.18155.1 | 16261 | coding    | PF00078 |
| MSTRG.18155.2 | 4132  | noncoding | —       |
| MSTRG.18156.1 | 8025  | noncoding | —       |
| MSTRG.18157.1 | 6823  | noncoding | —       |
| MSTRG.18158.3 | 1709  | coding    | PF05604 |
| MSTRG.18159.1 | 2522  | noncoding | —       |
| MSTRG.18161.4 | 2224  | noncoding | —       |
| MSTRG.18162.2 | 4464  | coding    | PF00105 |
| MSTRG.18164.1 | 1600  | coding    | PF03348 |
| MSTRG.18169.1 | 1154  | coding    | PF00658 |
| MSTRG.18170.3 | 1809  | noncoding | —       |
| MSTRG.18174.1 | 660   | noncoding | —       |
| MSTRG.18174.5 | 626   | noncoding | —       |

|                |      |           |         |
|----------------|------|-----------|---------|
| MSTRG.18173.1  | 789  | noncoding | -       |
| MSTRG.18173.2  | 807  | noncoding | -       |
| MSTRG.18176.2  | 413  | noncoding | -       |
| MSTRG.18177.2  | 608  | noncoding | -       |
| MSTRG.18183.4  | 1002 | coding    | PF15331 |
| MSTRG.18191.1  | 654  | coding    | PF00014 |
| MSTRG.18191.2  | 969  | coding    | PF00014 |
| MSTRG.18191.3  | 966  | coding    | PF00014 |
| MSTRG.18191.4  | 672  | coding    | PF00014 |
| MSTRG.18185.1  | 1947 | coding    | PF00014 |
| MSTRG.18196.2  | 1074 | noncoding | -       |
| MSTRG.18196.3  | 631  | noncoding | -       |
| MSTRG.18196.4  | 711  | noncoding | -       |
| MSTRG.18198.1  | 526  | noncoding | -       |
| MSTRG.18200.2  | 929  | noncoding | -       |
| MSTRG.18200.3  | 1041 | noncoding | -       |
| MSTRG.18200.4  | 955  | noncoding | -       |
| MSTRG.18200.5  | 697  | noncoding | -       |
| MSTRG.18201.2  | 1294 | noncoding | -       |
| MSTRG.18219.2  | 9443 | coding    | PF12237 |
| MSTRG.18219.1  | 8819 | coding    | PF12237 |
| MSTRG.18219.3  | 4989 | noncoding | -       |
| MSTRG.18219.4  | 5252 | noncoding | -       |
| MSTRG.18219.5  | 4984 | noncoding | -       |
| MSTRG.18219.6  | 5348 | noncoding | -       |
| MSTRG.18219.8  | 4705 | noncoding | -       |
| MSTRG.18210.1  | 2013 | noncoding | -       |
| MSTRG.18211.4  | 2415 | noncoding | -       |
| MSTRG.18212.2  | 3351 | noncoding | -       |
| MSTRG.18214.1  | 1397 | coding    | PF00028 |
| MSTRG.18214.2  | 981  | noncoding | -       |
| MSTRG.18215.1  | 3727 | noncoding | -       |
| MSTRG.18220.2  | 4160 | coding    | PF16457 |
| MSTRG.18226.2  | 1446 | noncoding | -       |
| MSTRG.18229.2  | 5533 | coding    | PF12064 |
| MSTRG.18229.1  | 5462 | coding    | PF12064 |
| MSTRG.18229.5  | 5376 | coding    | PF12064 |
| MSTRG.18234.1  | 822  | noncoding | -       |
| MSTRG.18240.1  | 7884 | coding    | PF16279 |
| MSTRG.18240.8  | 5882 | coding    | PF16279 |
| MSTRG.18240.7  | 6065 | coding    | PF16279 |
| MSTRG.18240.9  | 7894 | coding    | PF16279 |
| MSTRG.18240.10 | 7805 | coding    | PF16279 |
| MSTRG.18240.11 | 6245 | coding    | PF16279 |
| MSTRG.18241.1  | 4038 | noncoding | -       |
| MSTRG.18240.12 | 8425 | coding    | PF16279 |
| MSTRG.18242.2  | 4454 | coding    | PF12548 |
| MSTRG.18242.4  | 3021 | coding    | PF12548 |
| MSTRG.18245.1  | 2441 | noncoding | -       |
| MSTRG.18245.2  | 593  | noncoding | -       |
| MSTRG.18238.2  | 7298 | coding    | PF01369 |
| MSTRG.18239.1  | 4900 | noncoding | -       |
| MSTRG.18246.2  | 4000 | coding    | PF08506 |
| MSTRG.18246.3  | 4608 | coding    | PF03378 |

|                |       |           |         |
|----------------|-------|-----------|---------|
| MSTRG.18252.2  | 2366  | coding    | PF00270 |
| MSTRG.18253.2  | 7425  | coding    | PF13087 |
| MSTRG.18251.1  | 1325  | noncoding | —       |
| MSTRG.18259.2  | 3579  | coding    | PF13733 |
| MSTRG.18261.1  | 2329  | noncoding | —       |
| MSTRG.18269.10 | 1803  | noncoding | —       |
| MSTRG.18269.8  | 1835  | noncoding | —       |
| MSTRG.18269.6  | 1866  | noncoding | —       |
| MSTRG.18269.13 | 3147  | noncoding | —       |
| MSTRG.18269.3  | 4915  | noncoding | —       |
| MSTRG.18269.7  | 3631  | noncoding | —       |
| MSTRG.18269.11 | 1674  | noncoding | —       |
| MSTRG.18269.12 | 2389  | coding    | PF00179 |
| MSTRG.18269.1  | 3606  | coding    | PF10520 |
| MSTRG.18269.14 | 3027  | coding    | PF10520 |
| MSTRG.18269.2  | 5475  | coding    | PF10520 |
| MSTRG.18269.4  | 3603  | coding    | PF10520 |
| MSTRG.18269.5  | 3030  | coding    | PF10520 |
| MSTRG.18269.9  | 3454  | coding    | PF10520 |
| MSTRG.18275.1  | 7220  | noncoding | —       |
| MSTRG.18276.4  | 5117  | noncoding | —       |
| MSTRG.18276.3  | 5010  | noncoding | —       |
| MSTRG.18277.1  | 4451  | coding    | PF15903 |
| MSTRG.18277.4  | 4069  | coding    | PF15903 |
| MSTRG.18278.1  | 1028  | noncoding | —       |
| MSTRG.18270.2  | 2441  | noncoding | —       |
| MSTRG.18274.1  | 688   | noncoding | —       |
| MSTRG.18274.2  | 1988  | noncoding | —       |
| MSTRG.18274.3  | 2661  | noncoding | —       |
| MSTRG.18274.4  | 1039  | noncoding | —       |
| MSTRG.18273.2  | 1332  | noncoding | —       |
| MSTRG.18292.2  | 7125  | coding    | PF16212 |
| MSTRG.18292.3  | 6464  | coding    | PF16212 |
| MSTRG.18294.2  | 1089  | noncoding | —       |
| MSTRG.18294.5  | 1577  | noncoding | —       |
| MSTRG.18329.1  | 2518  | noncoding | —       |
| MSTRG.18346.1  | 2543  | noncoding | —       |
| MSTRG.18346.2  | 1702  | noncoding | —       |
| MSTRG.18346.3  | 2094  | noncoding | —       |
| MSTRG.18347.1  | 8711  | noncoding | —       |
| MSTRG.18348.1  | 12025 | noncoding | —       |
| MSTRG.18348.2  | 5680  | noncoding | —       |
| MSTRG.18349.1  | 35431 | noncoding | —       |
| MSTRG.18350.1  | 48418 | noncoding | —       |
| MSTRG.18350.2  | 45333 | noncoding | —       |
| MSTRG.18350.3  | 22085 | noncoding | —       |
| MSTRG.18351.1  | 35960 | noncoding | —       |
| MSTRG.18348.3  | 11824 | noncoding | —       |
| MSTRG.18352.1  | 9884  | noncoding | —       |
| MSTRG.18353.1  | 1834  | noncoding | —       |
| MSTRG.18354.1  | 8440  | noncoding | —       |
| MSTRG.18355.1  | 783   | noncoding | —       |
| MSTRG.18297.2  | 5448  | noncoding | —       |
| MSTRG.18297.3  | 5558  | noncoding | —       |

|               |      |           |         |
|---------------|------|-----------|---------|
| MSTRG.18297.6 | 2805 | noncoding | —       |
| MSTRG.18297.5 | 2709 | noncoding | —       |
| MSTRG.18299.2 | 1395 | noncoding | —       |
| MSTRG.18299.3 | 7226 | noncoding | —       |
| MSTRG.18304.1 | 489  | noncoding | —       |
| MSTRG.18306.2 | 1784 | noncoding | —       |
| MSTRG.18306.3 | 1057 | noncoding | —       |
| MSTRG.18307.1 | 835  | noncoding | —       |
| MSTRG.18321.1 | 2454 | noncoding | —       |
| MSTRG.18369.2 | 1422 | coding    | PF03947 |
| MSTRG.18369.5 | 899  | coding    | PF03947 |
| MSTRG.18369.4 | 1254 | coding    | PF03947 |
| MSTRG.18369.3 | 1295 | coding    | PF03947 |
| MSTRG.18371.2 | 1762 | noncoding | —       |
| MSTRG.18373.1 | 1884 | noncoding | —       |
| MSTRG.18378.2 | 2185 | noncoding | —       |
| MSTRG.18379.6 | 2795 | coding    | PF12796 |
| MSTRG.18381.3 | 2990 | coding    | PF00225 |
| MSTRG.18381.4 | 3034 | coding    | PF00225 |
| MSTRG.18382.3 | 8668 | noncoding | —       |
| MSTRG.18382.4 | 1445 | noncoding | —       |
| MSTRG.18383.3 | 1640 | coding    | PF06237 |
| MSTRG.18383.1 | 2751 | coding    | PF06237 |
| MSTRG.18386.1 | 977  | coding    | PF15158 |
| MSTRG.18386.2 | 845  | coding    | PF15158 |
| MSTRG.18398.5 | 2072 | coding    | PF06546 |
| MSTRG.18400.4 | 4153 | noncoding | —       |
| MSTRG.18400.3 | 5428 | noncoding | —       |
| MSTRG.18400.5 | 6473 | noncoding | —       |
| MSTRG.18400.7 | 5173 | noncoding | —       |
| MSTRG.18400.6 | 5316 | noncoding | —       |
| MSTRG.18400.9 | 4215 | noncoding | —       |
| MSTRG.18401.1 | 5608 | noncoding | —       |
| MSTRG.18405.1 | 3768 | noncoding | —       |
| MSTRG.18406.1 | 5102 | noncoding | —       |
| MSTRG.18408.1 | 2274 | coding    | PF16764 |
| MSTRG.18408.3 | 1521 | coding    | PF16764 |
| MSTRG.18408.4 | 1594 | coding    | PF16764 |
| MSTRG.18413.2 | 3660 | coding    | PF02538 |
| MSTRG.18413.3 | 3431 | coding    | PF02538 |
| MSTRG.18414.1 | 2180 | noncoding | —       |
| MSTRG.18416.4 | 2075 | coding    | PF15059 |
| MSTRG.18416.5 | 2011 | coding    | PF15059 |
| MSTRG.18416.6 | 1814 | coding    | PF15059 |
| MSTRG.18417.1 | 2210 | noncoding | —       |
| MSTRG.18417.3 | 1606 | noncoding | —       |
| MSTRG.18433.6 | 3746 | coding    | PF00076 |
| MSTRG.18433.7 | 1824 | coding    | PF00076 |
| MSTRG.18434.3 | 4921 | coding    | PF00595 |
| MSTRG.18435.1 | 2107 | coding    | PF12796 |
| MSTRG.18435.2 | 1967 | coding    | PF12796 |
| MSTRG.18438.1 | 4595 | noncoding | —       |
| MSTRG.18438.2 | 1179 | noncoding | —       |
| MSTRG.18447.3 | 4731 | coding    | PF00736 |

|                |       |           |         |
|----------------|-------|-----------|---------|
| MSTRG.18448.1  | 697   | noncoding | -       |
| MSTRG.18448.2  | 409   | noncoding | -       |
| MSTRG.18447.5  | 2472  | coding    | PF00736 |
| MSTRG.18424.4  | 2643  | noncoding | -       |
| MSTRG.18424.3  | 3362  | noncoding | -       |
| MSTRG.18424.2  | 3320  | noncoding | -       |
| MSTRG.18425.1  | 5212  | noncoding | -       |
| MSTRG.18425.2  | 2933  | noncoding | -       |
| MSTRG.18425.4  | 1996  | noncoding | -       |
| MSTRG.18425.3  | 1751  | noncoding | -       |
| MSTRG.18428.3  | 1585  | noncoding | -       |
| MSTRG.18428.2  | 3666  | noncoding | -       |
| MSTRG.18428.4  | 4361  | noncoding | -       |
| MSTRG.18428.5  | 4301  | noncoding | -       |
| MSTRG.18452.2  | 873   | noncoding | -       |
| MSTRG.18449.1  | 627   | noncoding | -       |
| MSTRG.18449.2  | 506   | noncoding | -       |
| MSTRG.18453.2  | 1897  | noncoding | -       |
| MSTRG.18454.2  | 3039  | noncoding | -       |
| MSTRG.18454.1  | 3119  | noncoding | -       |
| MSTRG.18454.3  | 2989  | noncoding | -       |
| MSTRG.18459.1  | 7520  | coding    | PF01781 |
| MSTRG.18462.1  | 2843  | noncoding | -       |
| MSTRG.18462.5  | 3838  | noncoding | -       |
| MSTRG.18462.7  | 3204  | noncoding | -       |
| MSTRG.18455.1  | 2553  | coding    | PF00002 |
| MSTRG.18464.1  | 549   | noncoding | -       |
| MSTRG.18466.1  | 1187  | noncoding | -       |
| MSTRG.18465.3  | 4014  | noncoding | -       |
| MSTRG.18465.2  | 4816  | noncoding | -       |
| MSTRG.18465.5  | 4974  | noncoding | -       |
| MSTRG.18465.4  | 5141  | noncoding | -       |
| MSTRG.18468.2  | 1754  | noncoding | -       |
| MSTRG.18470.4  | 5591  | noncoding | -       |
| MSTRG.18470.6  | 4117  | noncoding | -       |
| MSTRG.18470.8  | 1720  | noncoding | -       |
| MSTRG.18470.9  | 15568 | noncoding | -       |
| MSTRG.18470.11 | 6589  | noncoding | -       |
| MSTRG.18469.2  | 5325  | coding    | PF02141 |
| MSTRG.18477.2  | 4439  | coding    | PF07714 |
| MSTRG.18477.1  | 4582  | coding    | PF07714 |
| MSTRG.18477.3  | 4299  | coding    | PF07714 |
| MSTRG.18477.4  | 7177  | coding    | PF07714 |
| MSTRG.18477.5  | 4448  | coding    | PF07714 |
| MSTRG.18477.6  | 4429  | coding    | PF07714 |
| MSTRG.18477.7  | 4675  | coding    | PF07714 |
| MSTRG.18477.8  | 4296  | coding    | PF07714 |
| MSTRG.18477.9  | 4521  | coding    | PF07714 |
| MSTRG.18477.10 | 4175  | coding    | PF07714 |
| MSTRG.18477.11 | 768   | noncoding | -       |
| MSTRG.18477.12 | 6296  | coding    | PF07714 |
| MSTRG.18478.1  | 6460  | noncoding | -       |
| MSTRG.18477.14 | 5802  | coding    | PF03623 |
| MSTRG.18479.1  | 836   | noncoding | -       |

|                |       |           |         |
|----------------|-------|-----------|---------|
| MSTRG.18479.2  | 974   | noncoding | -       |
| MSTRG.18472.8  | 14759 | coding    | PF02171 |
| MSTRG.18473.1  | 1321  | noncoding | -       |
| MSTRG.18472.12 | 5410  | coding    | PF02171 |
| MSTRG.18474.2  | 1254  | noncoding | -       |
| MSTRG.18481.1  | 4077  | noncoding | -       |
| MSTRG.18482.1  | 1377  | noncoding | -       |
| MSTRG.18483.2  | 986   | noncoding | -       |
| MSTRG.18484.1  | 1521  | noncoding | -       |
| MSTRG.18484.2  | 1625  | noncoding | -       |
| MSTRG.18484.3  | 1307  | noncoding | -       |
| MSTRG.18480.2  | 2491  | coding    | PF07885 |
| MSTRG.18485.1  | 357   | noncoding | -       |
| MSTRG.18487.1  | 1130  | noncoding | -       |
| MSTRG.18487.2  | 4355  | noncoding | -       |
| MSTRG.18492.2  | 3805  | coding    | PF12394 |
| MSTRG.18490.1  | 380   | noncoding | -       |
| MSTRG.18499.2  | 1420  | coding    | PF16568 |
| MSTRG.18500.1  | 1521  | noncoding | -       |
| MSTRG.18504.1  | 1778  | noncoding | -       |
| MSTRG.18507.4  | 10368 | noncoding | -       |
| MSTRG.18507.5  | 1520  | noncoding | -       |
| MSTRG.18507.6  | 3643  | noncoding | -       |
| MSTRG.18508.2  | 3386  | noncoding | -       |
| MSTRG.18508.3  | 2842  | noncoding | -       |
| MSTRG.18511.1  | 6354  | coding    | PF00777 |
| MSTRG.18511.2  | 2626  | coding    | PF00777 |
| MSTRG.18511.3  | 2756  | coding    | PF00777 |
| MSTRG.18511.4  | 2710  | coding    | PF00777 |
| MSTRG.18513.3  | 2986  | noncoding | -       |
| MSTRG.18513.2  | 2799  | noncoding | -       |
| MSTRG.18516.2  | 8897  | coding    | PF16660 |
| MSTRG.18516.5  | 8620  | coding    | PF16660 |
| MSTRG.18517.1  | 1208  | noncoding | -       |
| MSTRG.18514.2  | 1449  | noncoding | -       |
| MSTRG.18514.3  | 1371  | noncoding | -       |
| MSTRG.18514.4  | 1598  | noncoding | -       |
| MSTRG.18519.1  | 291   | noncoding | -       |
| MSTRG.18524.1  | 3788  | noncoding | -       |
| MSTRG.18524.2  | 4564  | noncoding | -       |
| MSTRG.18524.4  | 3074  | noncoding | -       |
| MSTRG.18527.1  | 3478  | coding    | PF00211 |
| MSTRG.18527.2  | 823   | coding    | PF06327 |
| MSTRG.18529.3  | 1765  | coding    | PF07159 |
| MSTRG.18529.5  | 1705  | coding    | PF07159 |
| MSTRG.18529.4  | 1715  | coding    | PF07159 |
| MSTRG.18530.1  | 10927 | noncoding | -       |
| MSTRG.18530.2  | 10540 | noncoding | -       |
| MSTRG.18531.1  | 5922  | noncoding | -       |
| MSTRG.18536.1  | 344   | noncoding | -       |
| MSTRG.18538.1  | 402   | noncoding | -       |
| MSTRG.18540.1  | 506   | noncoding | -       |
| MSTRG.18600.2  | 3561  | noncoding | -       |
| MSTRG.18614.1  | 1473  | noncoding | -       |



|                |       |           |         |
|----------------|-------|-----------|---------|
| MSTRG.18615.1  | 2606  | noncoding | -       |
| MSTRG.18626.2  | 1870  | noncoding | -       |
| MSTRG.18622.6  | 11406 | noncoding | -       |
| MSTRG.18622.7  | 5465  | noncoding | -       |
| MSTRG.18631.2  | 12067 | coding    | PF00069 |
| MSTRG.18631.3  | 3117  | noncoding | -       |
| MSTRG.18632.1  | 4823  | noncoding | -       |
| MSTRG.18631.4  | 15388 | coding    | PF00069 |
| MSTRG.18633.1  | 392   | noncoding | -       |
| MSTRG.18622.8  | 5055  | coding    | PF00069 |
| MSTRG.18622.14 | 3281  | coding    | PF00069 |
| MSTRG.18631.6  | 6342  | coding    | PF00069 |
| MSTRG.18631.7  | 233   | noncoding | -       |
| MSTRG.18622.16 | 308   | noncoding | -       |
| MSTRG.18622.17 | 7428  | coding    | PF00069 |
| MSTRG.18631.9  | 3402  | coding    | PF00069 |
| MSTRG.18631.8  | 3981  | coding    | PF00069 |
| MSTRG.18622.20 | 4796  | noncoding | -       |
| MSTRG.18622.21 | 4790  | noncoding | -       |
| MSTRG.18622.22 | 1218  | noncoding | -       |
| MSTRG.18631.10 | 2225  | coding    | PF00069 |
| MSTRG.18622.34 | 6660  | coding    | PF00069 |
| MSTRG.18638.1  | 268   | noncoding | -       |
| MSTRG.18637.1  | 301   | noncoding | -       |
| MSTRG.18542.3  | 4476  | coding    | PF04970 |
| MSTRG.18546.4  | 1014  | noncoding | -       |
| MSTRG.18546.5  | 28286 | noncoding | -       |
| MSTRG.18546.6  | 38258 | noncoding | -       |
| MSTRG.18546.7  | 4448  | noncoding | -       |
| MSTRG.18546.8  | 22046 | noncoding | -       |
| MSTRG.18546.9  | 20728 | noncoding | -       |
| MSTRG.18546.10 | 13940 | noncoding | -       |
| MSTRG.18546.11 | 2401  | noncoding | -       |
| MSTRG.18546.12 | 26496 | noncoding | -       |
| MSTRG.18546.13 | 8816  | noncoding | -       |
| MSTRG.18546.14 | 5964  | noncoding | -       |
| MSTRG.18548.2  | 356   | noncoding | -       |
| MSTRG.18551.1  | 7390  | noncoding | -       |
| MSTRG.18552.1  | 12535 | noncoding | -       |
| MSTRG.18552.2  | 4090  | noncoding | -       |
| MSTRG.18555.1  | 5472  | coding    | PF08397 |
| MSTRG.18555.2  | 4808  | coding    | PF08397 |
| MSTRG.18557.4  | 1232  | coding    | PF01026 |
| MSTRG.18558.1  | 2857  | noncoding | -       |
| MSTRG.18559.1  | 3464  | coding    | PF13705 |
| MSTRG.18559.4  | 5866  | coding    | PF13705 |
| MSTRG.18559.6  | 5119  | coding    | PF13705 |
| MSTRG.18561.1  | 4210  | coding    | PF14648 |
| MSTRG.18561.3  | 3157  | coding    | PF14648 |
| MSTRG.18562.1  | 1327  | coding    | PF00191 |
| MSTRG.18562.2  | 1372  | coding    | PF00191 |
| MSTRG.18562.3  | 1733  | coding    | PF00191 |
| MSTRG.18563.1  | 497   | noncoding | -       |
| MSTRG.18564.1  | 7457  | noncoding | -       |

|                |       |           |         |
|----------------|-------|-----------|---------|
| MSTRG.18564.2  | 6822  | noncoding | -       |
| MSTRG.18565.1  | 3362  | coding    | PF09764 |
| MSTRG.18565.2  | 1565  | coding    | PF09764 |
| MSTRG.18568.1  | 5095  | coding    | PF00004 |
| MSTRG.18568.3  | 2548  | noncoding | -       |
| MSTRG.18568.6  | 2854  | noncoding | -       |
| MSTRG.18572.1  | 4791  | coding    | PF11569 |
| MSTRG.18572.4  | 5236  | coding    | PF11569 |
| MSTRG.18574.4  | 3179  | noncoding | -       |
| MSTRG.18574.5  | 3276  | noncoding | -       |
| MSTRG.18574.6  | 3389  | noncoding | -       |
| MSTRG.18574.7  | 7799  | noncoding | -       |
| MSTRG.18567.2  | 3083  | coding    | PF04511 |
| MSTRG.18589.1  | 215   | noncoding | -       |
| MSTRG.18590.1  | 327   | noncoding | -       |
| MSTRG.18594.2  | 1117  | coding    | PF00089 |
| MSTRG.18594.3  | 679   | noncoding | -       |
| MSTRG.18594.5  | 1130  | coding    | PF00089 |
| MSTRG.18594.6  | 1043  | noncoding | -       |
| MSTRG.18594.7  | 935   | noncoding | -       |
| MSTRG.18654.3  | 5915  | coding    | PF14951 |
| MSTRG.18654.4  | 15740 | coding    | PF14950 |
| MSTRG.18656.1  | 919   | noncoding | -       |
| MSTRG.18645.1  | 4533  | coding    | PF00179 |
| MSTRG.18647.2  | 980   | noncoding | -       |
| MSTRG.18653.1  | 387   | noncoding | -       |
| MSTRG.18659.1  | 1157  | noncoding | -       |
| MSTRG.18659.5  | 18100 | coding    | PF01135 |
| MSTRG.18662.5  | 6008  | coding    | PF10377 |
| MSTRG.18662.3  | 6485  | coding    | PF10377 |
| MSTRG.18666.8  | 3171  | coding    | PF02230 |
| MSTRG.18666.9  | 3286  | coding    | PF02230 |
| MSTRG.18666.4  | 2550  | coding    | PF02230 |
| MSTRG.18666.5  | 2681  | coding    | PF02230 |
| MSTRG.18666.6  | 2658  | coding    | PF02230 |
| MSTRG.18666.7  | 2638  | coding    | PF02230 |
| MSTRG.18666.10 | 3084  | coding    | PF02230 |
| MSTRG.18667.2  | 2438  | coding    | PF00828 |
| MSTRG.18677.1  | 1917  | noncoding | -       |
| MSTRG.18679.3  | 380   | noncoding | -       |
| MSTRG.18681.1  | 423   | noncoding | -       |
| MSTRG.18684.2  | 1376  | coding    | PF01160 |
| MSTRG.18685.1  | 632   | noncoding | -       |
| MSTRG.18698.1  | 3602  | noncoding | -       |
| MSTRG.18697.4  | 1663  | coding    | PF00595 |
| MSTRG.18702.2  | 8823  | noncoding | -       |
| MSTRG.18703.1  | 3072  | noncoding | -       |
| MSTRG.18704.1  | 5259  | noncoding | -       |
| MSTRG.18705.1  | 1209  | noncoding | -       |
| MSTRG.18706.1  | 7080  | noncoding | -       |
| MSTRG.18707.1  | 8950  | noncoding | -       |
| MSTRG.18709.2  | 11646 | coding    | PF00194 |
| MSTRG.18709.3  | 8951  | coding    | PF00194 |
| MSTRG.18709.4  | 12331 | coding    | PF00194 |

|               |       |           |         |
|---------------|-------|-----------|---------|
| MSTRG.18711.4 | 1738  | coding    | PF00071 |
| MSTRG.18713.1 | 547   | noncoding | —       |
| MSTRG.18715.2 | 900   | noncoding | —       |
| MSTRG.18715.4 | 1950  | noncoding | —       |
| MSTRG.18722.1 | 898   | noncoding | —       |
| MSTRG.18725.6 | 6350  | coding    | PF04146 |
| MSTRG.18725.7 | 5857  | coding    | PF04146 |
| MSTRG.18726.1 | 852   | noncoding | —       |
| MSTRG.18718.1 | 2496  | noncoding | —       |
| MSTRG.18732.2 | 5817  | noncoding | —       |
| MSTRG.18733.1 | 2266  | noncoding | —       |
| MSTRG.18734.1 | 9700  | noncoding | —       |
| MSTRG.18734.2 | 4446  | noncoding | —       |
| MSTRG.18741.3 | 2597  | coding    | PF05308 |
| MSTRG.18743.3 | 1395  | coding    | PF00226 |
| MSTRG.18744.1 | 2550  | noncoding | —       |
| MSTRG.18749.1 | 5107  | noncoding | —       |
| MSTRG.18749.2 | 6270  | noncoding | —       |
| MSTRG.18749.3 | 8219  | noncoding | —       |
| MSTRG.18750.1 | 845   | noncoding | —       |
| MSTRG.18751.2 | 1318  | coding    | PF00787 |
| MSTRG.18751.4 | 805   | coding    | PF00787 |
| MSTRG.18752.1 | 2808  | noncoding | —       |
| MSTRG.18752.2 | 2558  | noncoding | —       |
| MSTRG.18762.2 | 3761  | noncoding | —       |
| MSTRG.18762.1 | 3664  | noncoding | —       |
| MSTRG.18763.1 | 4697  | noncoding | —       |
| MSTRG.18762.3 | 1738  | noncoding | —       |
| MSTRG.18764.1 | 4573  | noncoding | —       |
| MSTRG.18762.4 | 1628  | noncoding | —       |
| MSTRG.18763.2 | 4683  | noncoding | —       |
| MSTRG.18763.4 | 4058  | noncoding | —       |
| MSTRG.18763.5 | 4055  | noncoding | —       |
| MSTRG.18763.7 | 4644  | noncoding | —       |
| MSTRG.18768.2 | 7446  | coding    | PF01369 |
| MSTRG.18756.1 | 673   | noncoding | —       |
| MSTRG.18761.1 | 5527  | coding    | PF12548 |
| MSTRG.18769.5 | 10337 | coding    | PF16665 |
| MSTRG.18769.6 | 7945  | coding    | PF16665 |
| MSTRG.18770.1 | 7025  | noncoding | —       |
| MSTRG.18771.1 | 1411  | noncoding | —       |
| MSTRG.18772.1 | 487   | noncoding | —       |
| MSTRG.18773.1 | 1078  | noncoding | —       |
| MSTRG.18776.1 | 552   | noncoding | —       |
| MSTRG.18805.1 | 18699 | noncoding | —       |
| MSTRG.18805.2 | 7727  | noncoding | —       |
| MSTRG.18816.4 | 703   | noncoding | —       |
| MSTRG.18816.5 | 1840  | noncoding | —       |
| MSTRG.18818.2 | 3219  | noncoding | —       |
| MSTRG.18825.7 | 7942  | coding    | PF16482 |
| MSTRG.18829.1 | 8023  | noncoding | —       |
| MSTRG.18821.1 | 1410  | noncoding | —       |
| MSTRG.18822.4 | 1847  | noncoding | —       |
| MSTRG.18830.2 | 2776  | noncoding | —       |

|               |       |           |         |
|---------------|-------|-----------|---------|
| MSTRG.18830.3 | 298   | noncoding | -       |
| MSTRG.18838.1 | 414   | noncoding | -       |
| MSTRG.18841.1 | 1212  | noncoding | -       |
| MSTRG.18850.1 | 505   | noncoding | -       |
| MSTRG.18852.1 | 10781 | coding    | PF00046 |
| MSTRG.18861.1 | 1167  | noncoding | -       |
| MSTRG.18862.1 | 378   | noncoding | -       |
| MSTRG.18872.1 | 218   | noncoding | -       |
| MSTRG.18882.1 | 488   | noncoding | -       |
| MSTRG.18894.1 | 517   | noncoding | -       |
| MSTRG.18894.4 | 723   | coding    | PF00061 |
| MSTRG.18894.6 | 636   | noncoding | -       |
| MSTRG.18894.7 | 535   | coding    | PF00061 |
| MSTRG.18894.3 | 494   | noncoding | -       |
| MSTRG.18894.5 | 601   | coding    | PF00061 |
| MSTRG.18906.1 | 9654  | noncoding | -       |
| MSTRG.18907.1 | 3175  | noncoding | -       |
| MSTRG.18908.1 | 1050  | noncoding | -       |
| MSTRG.18911.1 | 252   | noncoding | -       |
| MSTRG.18917.2 | 4023  | coding    | PF04825 |
| MSTRG.18917.3 | 4239  | coding    | PF04825 |
| MSTRG.18958.1 | 438   | noncoding | -       |
| MSTRG.18967.1 | 1308  | coding    | PF00431 |
| MSTRG.18967.3 | 5440  | coding    | PF00431 |
| MSTRG.18955.1 | 1416  | noncoding | -       |
| MSTRG.18979.1 | 1019  | noncoding | -       |
| MSTRG.18983.2 | 4150  | coding    | PF10162 |
| MSTRG.18986.1 | 1651  | noncoding | -       |
| MSTRG.18987.1 | 2778  | noncoding | -       |
| MSTRG.18984.2 | 524   | noncoding | -       |
| MSTRG.18997.1 | 896   | noncoding | -       |
| MSTRG.18997.2 | 1586  | noncoding | -       |
| MSTRG.18999.1 | 733   | noncoding | -       |
| MSTRG.18999.2 | 1191  | noncoding | -       |
| MSTRG.19005.1 | 8811  | noncoding | -       |
| MSTRG.19006.1 | 16484 | noncoding | -       |
| MSTRG.19014.6 | 3409  | coding    | PF07534 |
| MSTRG.19014.5 | 3624  | coding    | PF07534 |
| MSTRG.19015.1 | 510   | noncoding | -       |
| MSTRG.19015.2 | 565   | noncoding | -       |
| MSTRG.19015.3 | 850   | noncoding | -       |
| MSTRG.19009.1 | 234   | noncoding | -       |
| MSTRG.19024.1 | 431   | noncoding | -       |
| MSTRG.19041.1 | 222   | noncoding | -       |
| MSTRG.19049.1 | 21591 | noncoding | -       |
| MSTRG.19049.2 | 17093 | noncoding | -       |
| MSTRG.19049.3 | 526   | noncoding | -       |
| MSTRG.19049.4 | 4763  | noncoding | -       |
| MSTRG.19052.2 | 3097  | coding    | PF00153 |
| MSTRG.19034.1 | 1232  | noncoding | -       |
| MSTRG.19038.1 | 994   | noncoding | -       |
| MSTRG.19039.3 | 4312  | coding    | PF02784 |
| MSTRG.19053.2 | 3056  | noncoding | -       |
| MSTRG.19053.3 | 3467  | noncoding | -       |

|               |       |           |         |
|---------------|-------|-----------|---------|
| MSTRG.19059.4 | 8794  | coding    | PF00632 |
| MSTRG.19059.3 | 9864  | coding    | PF00632 |
| MSTRG.19061.1 | 1186  | coding    | PF04516 |
| MSTRG.19063.1 | 780   | noncoding | —       |
| MSTRG.19066.1 | 1248  | noncoding | —       |
| MSTRG.19068.2 | 586   | noncoding | —       |
| MSTRG.19069.1 | 3423  | coding    | PF00244 |
| MSTRG.19069.2 | 3121  | coding    | PF00244 |
| MSTRG.19069.4 | 3299  | coding    | PF00244 |
| MSTRG.19069.6 | 25219 | coding    | PF00244 |
| MSTRG.19072.1 | 2689  | coding    | PF00658 |
| MSTRG.19072.2 | 3514  | coding    | PF00658 |
| MSTRG.19072.3 | 3772  | coding    | PF00658 |
| MSTRG.19072.4 | 2701  | coding    | PF00076 |
| MSTRG.19073.3 | 354   | noncoding | —       |
| MSTRG.19075.1 | 5466  | noncoding | —       |
| MSTRG.19089.2 | 10459 | noncoding | —       |
| MSTRG.19089.3 | 3718  | noncoding | —       |
| MSTRG.19090.2 | 1897  | noncoding | —       |
| MSTRG.19094.1 | 5027  | coding    | PF02937 |
| MSTRG.19094.2 | 4771  | noncoding | —       |
| MSTRG.19094.3 | 4679  | coding    | PF02937 |
| MSTRG.19094.5 | 2793  | noncoding | —       |
| MSTRG.19095.1 | 1411  | noncoding | —       |
| MSTRG.19096.1 | 14239 | coding    | PF16909 |
| MSTRG.19099.1 | 901   | noncoding | —       |
| MSTRG.19100.1 | 460   | noncoding | —       |
| MSTRG.19101.1 | 1354  | noncoding | —       |
| MSTRG.19078.2 | 2692  | coding    | PF00069 |
| MSTRG.19078.3 | 2892  | coding    | PF00069 |
| MSTRG.19079.1 | 1995  | noncoding | —       |
| MSTRG.19081.1 | 3777  | noncoding | —       |
| MSTRG.19083.1 | 565   | noncoding | —       |
| MSTRG.19084.3 | 1886  | coding    | PF05653 |
| MSTRG.19085.1 | 2065  | coding    | PF00078 |
| MSTRG.19107.3 | 4155  | coding    | PF00092 |
| MSTRG.19110.1 | 895   | noncoding | —       |
| MSTRG.19113.4 | 2958  | coding    | PF00956 |
| MSTRG.19115.4 | 3072  | noncoding | —       |
| MSTRG.19115.5 | 1912  | noncoding | —       |
| MSTRG.19116.2 | 2930  | coding    | PF01034 |
| MSTRG.19116.4 | 1086  | coding    | PF01034 |
| MSTRG.19117.2 | 1262  | coding    | PF03034 |
| MSTRG.19121.1 | 431   | noncoding | —       |
| MSTRG.19122.1 | 294   | noncoding | —       |
| MSTRG.19126.2 | 2963  | coding    | PF14996 |
| MSTRG.19127.1 | 493   | noncoding | —       |
| MSTRG.19129.1 | 4500  | coding    | PF00494 |
| MSTRG.19129.2 | 8897  | noncoding | —       |
| MSTRG.19129.4 | 2181  | coding    | PF00494 |
| MSTRG.19129.5 | 2380  | coding    | PF00494 |
| MSTRG.19131.8 | 1094  | coding    | PF14839 |
| MSTRG.19131.7 | 4405  | coding    | PF14839 |
| MSTRG.19131.4 | 5493  | coding    | PF14839 |

|                |       |           |         |
|----------------|-------|-----------|---------|
| MSTRG.19131.5  | 5413  | coding    | PF14839 |
| MSTRG.19131.6  | 5375  | coding    | PF14839 |
| MSTRG.19133.3  | 2325  | noncoding | —       |
| MSTRG.19133.4  | 3756  | noncoding | —       |
| MSTRG.19134.3  | 4262  | coding    | PF10034 |
| MSTRG.19134.4  | 3870  | coding    | PF10034 |
| MSTRG.19136.1  | 1301  | noncoding | —       |
| MSTRG.19138.1  | 13531 | coding    | PF15912 |
| MSTRG.19142.5  | 3739  | coding    | PF00481 |
| MSTRG.19148.3  | 2864  | coding    | PF09773 |
| MSTRG.19148.4  | 2094  | coding    | PF09773 |
| MSTRG.19150.1  | 7942  | noncoding | —       |
| MSTRG.19150.2  | 9381  | coding    | PF06730 |
| MSTRG.19152.2  | 1305  | coding    | PF06730 |
| MSTRG.19144.1  | 679   | noncoding | —       |
| MSTRG.19146.1  | 774   | noncoding | —       |
| MSTRG.19155.1  | 1129  | noncoding | —       |
| MSTRG.19156.1  | 203   | noncoding | —       |
| MSTRG.19158.4  | 5488  | coding    | PF08788 |
| MSTRG.19175.1  | 971   | noncoding | —       |
| MSTRG.19177.4  | 6166  | noncoding | —       |
| MSTRG.19177.1  | 1666  | coding    | PF02338 |
| MSTRG.19177.3  | 1476  | coding    | PF02338 |
| MSTRG.19177.5  | 1495  | coding    | PF02338 |
| MSTRG.19177.6  | 3466  | noncoding | —       |
| MSTRG.19177.7  | 5191  | coding    | PF00078 |
| MSTRG.19177.8  | 2641  | coding    | PF00078 |
| MSTRG.19177.9  | 3086  | coding    | PF02338 |
| MSTRG.19177.10 | 3869  | noncoding | —       |
| MSTRG.19177.12 | 2136  | noncoding | —       |
| MSTRG.19177.13 | 1809  | coding    | PF02338 |
| MSTRG.19183.1  | 1211  | noncoding | —       |
| MSTRG.19183.2  | 748   | noncoding | —       |
| MSTRG.19189.2  | 2016  | noncoding | —       |
| MSTRG.19166.2  | 3489  | coding    | PF16508 |
| MSTRG.19166.3  | 3317  | coding    | PF08599 |
| MSTRG.19168.1  | 2079  | noncoding | —       |
| MSTRG.19169.4  | 3344  | noncoding | —       |
| MSTRG.19171.7  | 1951  | noncoding | —       |
| MSTRG.19171.2  | 1893  | noncoding | —       |
| MSTRG.19171.3  | 1606  | coding    | PF07714 |
| MSTRG.19171.4  | 1808  | coding    | PF07714 |
| MSTRG.19171.5  | 1872  | noncoding | —       |
| MSTRG.19171.6  | 1743  | noncoding | —       |
| MSTRG.19194.2  | 926   | noncoding | —       |
| MSTRG.19196.1  | 1021  | noncoding | —       |
| MSTRG.19196.2  | 1064  | noncoding | —       |
| MSTRG.19203.1  | 1541  | coding    | PF00027 |
| MSTRG.19203.2  | 648   | noncoding | —       |
| MSTRG.19204.3  | 2761  | coding    | PF07002 |
| MSTRG.19205.1  | 1568  | coding    | PF07002 |
| MSTRG.19205.2  | 1835  | coding    | PF07002 |
| MSTRG.19205.3  | 1056  | coding    | PF07002 |
| MSTRG.19206.1  | 283   | noncoding | —       |

|               |       |           |         |
|---------------|-------|-----------|---------|
| MSTRG.19207.2 | 1239  | noncoding | -       |
| MSTRG.19210.5 | 2670  | noncoding | -       |
| MSTRG.19210.6 | 10292 | coding    | PF00632 |
| MSTRG.19210.4 | 5853  | coding    | PF00632 |
| MSTRG.19210.7 | 9995  | coding    | PF00632 |
| MSTRG.19210.3 | 8751  | coding    | PF00632 |
| MSTRG.19210.8 | 4176  | noncoding | -       |
| MSTRG.19197.1 | 2171  | noncoding | -       |
| MSTRG.19202.1 | 696   | noncoding | -       |
| MSTRG.19213.1 | 2107  | coding    | PF15679 |
| MSTRG.19213.2 | 1668  | noncoding | -       |
| MSTRG.19215.1 | 2296  | noncoding | -       |
| MSTRG.19217.4 | 3024  | noncoding | -       |
| MSTRG.19217.2 | 2980  | noncoding | -       |
| MSTRG.19217.5 | 2319  | noncoding | -       |
| MSTRG.19218.1 | 861   | noncoding | -       |
| MSTRG.19318.1 | 5925  | noncoding | -       |
| MSTRG.19319.3 | 2767  | noncoding | -       |
| MSTRG.19323.1 | 1166  | noncoding | -       |
| MSTRG.19319.4 | 9672  | noncoding | -       |
| MSTRG.19319.5 | 3332  | noncoding | -       |
| MSTRG.19319.6 | 5934  | noncoding | -       |
| MSTRG.19325.1 | 4401  | noncoding | -       |
| MSTRG.19325.2 | 8539  | noncoding | -       |
| MSTRG.19326.1 | 8218  | noncoding | -       |
| MSTRG.19328.1 | 11791 | coding    | PF00078 |
| MSTRG.19338.1 | 2537  | noncoding | -       |
| MSTRG.19339.1 | 8312  | noncoding | -       |
| MSTRG.19340.1 | 6707  | noncoding | -       |
| MSTRG.19342.1 | 3415  | noncoding | -       |
| MSTRG.19347.2 | 12469 | noncoding | -       |
| MSTRG.19339.2 | 33253 | coding    | PF00078 |
| MSTRG.19339.3 | 10211 | coding    | PF00078 |
| MSTRG.19339.4 | 8541  | noncoding | -       |
| MSTRG.19339.5 | 12283 | coding    | PF00078 |
| MSTRG.19339.6 | 6459  | noncoding | -       |
| MSTRG.19339.7 | 2642  | noncoding | -       |
| MSTRG.19339.8 | 5934  | noncoding | -       |
| MSTRG.19349.1 | 2906  | noncoding | -       |
| MSTRG.19221.1 | 9078  | noncoding | -       |
| MSTRG.19221.2 | 2513  | noncoding | -       |
| MSTRG.19230.1 | 1059  | noncoding | -       |
| MSTRG.19235.1 | 470   | noncoding | -       |
| MSTRG.19249.1 | 1854  | noncoding | -       |
| MSTRG.19249.2 | 2062  | noncoding | -       |
| MSTRG.19249.3 | 744   | noncoding | -       |
| MSTRG.19249.4 | 2565  | noncoding | -       |
| MSTRG.19237.1 | 3282  | coding    | PF00787 |
| MSTRG.19252.4 | 1789  | noncoding | -       |
| MSTRG.19253.1 | 1201  | noncoding | -       |
| MSTRG.19253.4 | 919   | noncoding | -       |
| MSTRG.19253.5 | 895   | noncoding | -       |
| MSTRG.19254.1 | 5126  | noncoding | -       |
| MSTRG.19258.1 | 3515  | noncoding | -       |

|                |       |           |         |
|----------------|-------|-----------|---------|
| MSTRG.19258.2  | 2337  | noncoding | -       |
| MSTRG.19264.1  | 7782  | noncoding | -       |
| MSTRG.19265.1  | 1451  | coding    | PF00572 |
| MSTRG.19266.2  | 3618  | coding    | PF14919 |
| MSTRG.19270.2  | 2275  | coding    | PF00083 |
| MSTRG.19278.1  | 667   | noncoding | -       |
| MSTRG.19281.2  | 2741  | coding    | PF12796 |
| MSTRG.19285.2  | 6074  | noncoding | -       |
| MSTRG.19285.3  | 6865  | noncoding | -       |
| MSTRG.19285.4  | 6468  | noncoding | -       |
| MSTRG.19291.1  | 4140  | noncoding | -       |
| MSTRG.19291.2  | 1617  | noncoding | -       |
| MSTRG.19283.1  | 3141  | coding    | PF13873 |
| MSTRG.19283.3  | 6305  | coding    | PF13873 |
| MSTRG.19305.4  | 2958  | noncoding | -       |
| MSTRG.19311.1  | 3394  | coding    | PF03028 |
| MSTRG.19311.2  | 13532 | coding    | PF12774 |
| MSTRG.19311.4  | 538   | noncoding | -       |
| MSTRG.19311.5  | 9169  | coding    | PF12774 |
| MSTRG.19311.6  | 5506  | coding    | PF12774 |
| MSTRG.19312.1  | 811   | noncoding | -       |
| MSTRG.19314.1  | 3001  | noncoding | -       |
| MSTRG.19314.3  | 3793  | noncoding | -       |
| MSTRG.19314.4  | 3058  | noncoding | -       |
| MSTRG.19316.1  | 3376  | coding    | PF00653 |
| MSTRG.19314.6  | 3486  | noncoding | -       |
| MSTRG.19316.2  | 5284  | coding    | PF00653 |
| MSTRG.19316.3  | 3645  | coding    | PF00653 |
| MSTRG.19316.4  | 3594  | coding    | PF00653 |
| MSTRG.19317.1  | 1907  | noncoding | -       |
| MSTRG.19313.1  | 4792  | coding    | PF00653 |
| MSTRG.19352.1  | 5773  | coding    | PF00833 |
| MSTRG.19352.3  | 4163  | noncoding | -       |
| MSTRG.19352.4  | 2855  | noncoding | -       |
| MSTRG.19352.5  | 3389  | noncoding | -       |
| MSTRG.19352.12 | 1374  | noncoding | -       |
| MSTRG.19352.10 | 6783  | noncoding | -       |
| MSTRG.19352.13 | 1108  | noncoding | -       |
| MSTRG.19352.9  | 1168  | noncoding | -       |
| MSTRG.19352.8  | 2879  | noncoding | -       |
| MSTRG.19352.11 | 3097  | noncoding | -       |
| MSTRG.19352.6  | 1661  | noncoding | -       |
| MSTRG.19354.1  | 3926  | noncoding | -       |
| MSTRG.19359.2  | 1426  | coding    | PF14926 |
| MSTRG.19359.3  | 4112  | coding    | PF14926 |
| MSTRG.19359.4  | 2305  | coding    | PF14926 |
| MSTRG.19359.5  | 1150  | coding    | PF14926 |
| MSTRG.19361.1  | 6176  | coding    | PF15352 |
| MSTRG.19361.2  | 4686  | coding    | PF15352 |
| MSTRG.19361.3  | 2027  | coding    | PF15352 |
| MSTRG.19361.4  | 4453  | coding    | PF15352 |
| MSTRG.19361.5  | 7937  | coding    | PF15352 |
| MSTRG.19361.6  | 12135 | coding    | PF15352 |
| MSTRG.19361.10 | 1662  | coding    | PF15352 |



|                  |       |           |         |
|------------------|-------|-----------|---------|
| MSTRG. 19361. 7  | 3570  | coding    | PF15352 |
| MSTRG. 19361. 8  | 2742  | coding    | PF15352 |
| MSTRG. 19361. 9  | 3852  | coding    | PF15352 |
| MSTRG. 19361. 11 | 4644  | coding    | PF15352 |
| MSTRG. 19361. 12 | 13860 | coding    | PF15352 |
| MSTRG. 19361. 13 | 8371  | coding    | PF15352 |
| MSTRG. 19361. 14 | 7824  | coding    | PF15352 |
| MSTRG. 19363. 1  | 632   | noncoding | —       |
| MSTRG. 19401. 1  | 3876  | noncoding | —       |
| MSTRG. 19402. 1  | 426   | noncoding | —       |
| MSTRG. 19368. 1  | 223   | noncoding | —       |
| MSTRG. 19369. 1  | 728   | noncoding | —       |
| MSTRG. 19370. 1  | 358   | noncoding | —       |
| MSTRG. 19407. 1  | 917   | noncoding | —       |
| MSTRG. 19408. 1  | 1973  | coding    | PF09596 |
| MSTRG. 19414. 1  | 2709  | coding    | PF06602 |
| MSTRG. 19414. 2  | 2798  | coding    | PF06602 |
| MSTRG. 19415. 1  | 2868  | coding    | PF14073 |
| MSTRG. 19415. 3  | 1789  | coding    | PF14073 |
| MSTRG. 19415. 4  | 1632  | coding    | PF14073 |
| MSTRG. 19416. 1  | 2739  | coding    | PF16046 |
| MSTRG. 19416. 2  | 1834  | coding    | PF16046 |
| MSTRG. 19413. 1  | 1454  | noncoding | —       |
| MSTRG. 19420. 2  | 9443  | coding    | PF04636 |
| MSTRG. 19422. 1  | 1604  | coding    | PF02373 |
| MSTRG. 19422. 3  | 4664  | coding    | PF02373 |
| MSTRG. 19422. 2  | 2809  | coding    | PF02373 |
| MSTRG. 19422. 4  | 2511  | coding    | PF02373 |
| MSTRG. 19422. 5  | 2427  | coding    | PF02373 |
| MSTRG. 19423. 1  | 3239  | noncoding | —       |
| MSTRG. 19425. 1  | 4809  | coding    | PF12240 |
| MSTRG. 19425. 4  | 8463  | coding    | PF12240 |
| MSTRG. 19428. 1  | 2984  | coding    | PF02171 |
| MSTRG. 19432. 1  | 1062  | noncoding | —       |
| MSTRG. 19434. 1  | 3328  | coding    | PF04676 |
| MSTRG. 19435. 1  | 1634  | noncoding | —       |
| MSTRG. 19436. 1  | 1445  | noncoding | —       |
| MSTRG. 19440. 2  | 2207  | noncoding | —       |
| MSTRG. 19440. 1  | 592   | noncoding | —       |
| MSTRG. 19441. 1  | 1025  | noncoding | —       |
| MSTRG. 19446. 2  | 6547  | coding    | PF00888 |
| MSTRG. 19464. 1  | 11294 | coding    | PF00454 |
| MSTRG. 19464. 6  | 812   | noncoding | —       |
| MSTRG. 19478. 2  | 3199  | coding    | PF05686 |
| MSTRG. 19479. 1  | 1248  | noncoding | —       |
| MSTRG. 19448. 1  | 1542  | noncoding | —       |
| MSTRG. 19458. 2  | 2722  | noncoding | —       |
| MSTRG. 19458. 4  | 2707  | noncoding | —       |
| MSTRG. 19458. 3  | 621   | noncoding | —       |
| MSTRG. 19458. 5  | 10278 | coding    | PF11977 |
| MSTRG. 19459. 1  | 3968  | noncoding | —       |
| MSTRG. 19481. 1  | 9242  | noncoding | —       |
| MSTRG. 19480. 2  | 9592  | coding    | PF00769 |
| MSTRG. 19485. 1  | 6734  | noncoding | —       |

|               |       |           |         |
|---------------|-------|-----------|---------|
| MSTRG.19485.2 | 6949  | noncoding | -       |
| MSTRG.19485.3 | 872   | noncoding | -       |
| MSTRG.19486.1 | 6701  | noncoding | -       |
| MSTRG.19490.5 | 6139  | coding    | PF00620 |
| MSTRG.19490.8 | 1810  | coding    | PF00620 |
| MSTRG.19491.1 | 2296  | noncoding | -       |
| MSTRG.19492.1 | 10202 | noncoding | -       |
| MSTRG.19493.1 | 2311  | coding    | PF02994 |
| MSTRG.19494.1 | 1757  | noncoding | -       |
| MSTRG.19495.1 | 6926  | coding    | PF02994 |
| MSTRG.19496.1 | 3187  | noncoding | -       |
| MSTRG.19505.2 | 2367  | coding    | PF07742 |
| MSTRG.19505.3 | 1313  | coding    | PF07742 |
| MSTRG.19505.4 | 2596  | coding    | PF07742 |
| MSTRG.19506.1 | 1966  | noncoding | -       |
| MSTRG.19507.4 | 1289  | noncoding | -       |
| MSTRG.19508.3 | 802   | coding    | PF00069 |
| MSTRG.19509.2 | 2204  | noncoding | -       |
| MSTRG.19515.3 | 936   | coding    | PF06608 |
| MSTRG.19515.2 | 3863  | coding    | PF06608 |
| MSTRG.19515.4 | 740   | coding    | PF06608 |
| MSTRG.19521.1 | 1397  | noncoding | -       |
| MSTRG.19521.2 | 1891  | noncoding | -       |
| MSTRG.19522.4 | 3303  | coding    | PF15692 |
| MSTRG.19526.1 | 355   | noncoding | -       |
| MSTRG.19530.1 | 5417  | coding    | PF01242 |
| MSTRG.19531.1 | 4855  | coding    | PF02994 |
| MSTRG.19526.2 | 7882  | noncoding | -       |
| MSTRG.19532.1 | 749   | noncoding | -       |
| MSTRG.19516.1 | 2109  | noncoding | -       |
| MSTRG.19533.5 | 9803  | noncoding | -       |
| MSTRG.19533.6 | 427   | noncoding | -       |
| MSTRG.19534.1 | 3594  | noncoding | -       |
| MSTRG.19533.7 | 5894  | coding    | PF07679 |
| MSTRG.19535.1 | 1688  | noncoding | -       |
| MSTRG.19538.1 | 2946  | noncoding | -       |
| MSTRG.19540.1 | 5225  | noncoding | -       |
| MSTRG.19543.4 | 3448  | coding    | PF00443 |
| MSTRG.19543.5 | 2879  | coding    | PF00443 |
| MSTRG.19543.6 | 3305  | coding    | PF00443 |
| MSTRG.19544.1 | 1140  | noncoding | -       |
| MSTRG.19547.1 | 6569  | noncoding | -       |
| MSTRG.19551.2 | 1092  | coding    | PF00929 |
| MSTRG.19555.1 | 1961  | noncoding | -       |
| MSTRG.19559.7 | 3728  | coding    | PF08205 |
| MSTRG.19559.8 | 3776  | coding    | PF08205 |
| MSTRG.19559.5 | 4252  | coding    | PF08205 |
| MSTRG.19559.6 | 4138  | coding    | PF08205 |
| MSTRG.19560.1 | 40849 | noncoding | -       |
| MSTRG.19561.1 | 18371 | noncoding | -       |
| MSTRG.19562.2 | 39462 | noncoding | -       |
| MSTRG.19562.1 | 2896  | noncoding | -       |
| MSTRG.19562.4 | 52749 | noncoding | -       |
| MSTRG.19562.5 | 41335 | noncoding | -       |

|                |       |           |         |
|----------------|-------|-----------|---------|
| MSTRG.19562.3  | 43292 | noncoding | -       |
| MSTRG.19562.6  | 54484 | noncoding | -       |
| MSTRG.19559.9  | 9553  | noncoding | -       |
| MSTRG.19563.1  | 2389  | noncoding | -       |
| MSTRG.19568.1  | 2587  | coding    | PF01442 |
| MSTRG.19568.2  | 1063  | coding    | PF01442 |
| MSTRG.19568.3  | 907   | coding    | PF01442 |
| MSTRG.19568.4  | 1168  | coding    | PF01442 |
| MSTRG.19572.9  | 4060  | noncoding | -       |
| MSTRG.19572.8  | 4392  | coding    | PF00069 |
| MSTRG.19572.5  | 4933  | coding    | PF00069 |
| MSTRG.19572.7  | 4315  | coding    | PF00069 |
| MSTRG.19572.6  | 7472  | coding    | PF00069 |
| MSTRG.19573.1  | 3371  | noncoding | -       |
| MSTRG.19572.10 | 5410  | noncoding | -       |
| MSTRG.19572.11 | 8062  | noncoding | -       |
| MSTRG.19574.1  | 3027  | noncoding | -       |
| MSTRG.19572.12 | 9794  | noncoding | -       |
| MSTRG.19570.2  | 2302  | noncoding | -       |
| MSTRG.19570.3  | 9703  | noncoding | -       |
| MSTRG.19570.4  | 4603  | noncoding | -       |
| MSTRG.19571.2  | 3825  | coding    | PF13965 |
| MSTRG.19577.2  | 1384  | noncoding | -       |
| MSTRG.19579.1  | 4562  | noncoding | -       |
| MSTRG.19579.2  | 2383  | noncoding | -       |
| MSTRG.19582.2  | 8196  | noncoding | -       |
| MSTRG.19582.4  | 7523  | noncoding | -       |
| MSTRG.19582.5  | 7433  | noncoding | -       |
| MSTRG.19582.6  | 5604  | noncoding | -       |
| MSTRG.19582.3  | 8324  | noncoding | -       |
| MSTRG.19582.7  | 8186  | noncoding | -       |
| MSTRG.19581.1  | 1221  | noncoding | -       |
| MSTRG.19583.1  | 3004  | coding    | PF00089 |
| MSTRG.19590.1  | 1427  | noncoding | -       |
| MSTRG.19590.2  | 1007  | noncoding | -       |
| MSTRG.19591.1  | 745   | noncoding | -       |
| MSTRG.19591.2  | 916   | noncoding | -       |
| MSTRG.19593.1  | 1221  | coding    | PF16681 |
| MSTRG.19596.4  | 3533  | coding    | PF10408 |
| MSTRG.19598.3  | 16544 | coding    | PF00856 |
| MSTRG.19598.5  | 14445 | coding    | PF00856 |
| MSTRG.19598.6  | 15510 | coding    | PF00856 |
| MSTRG.19600.1  | 2682  | coding    | PF12317 |
| MSTRG.19602.1  | 5496  | noncoding | -       |
| MSTRG.19603.1  | 800   | noncoding | -       |
| MSTRG.19602.3  | 5144  | noncoding | -       |
| MSTRG.19602.4  | 5466  | noncoding | -       |
| MSTRG.19602.5  | 7475  | noncoding | -       |
| MSTRG.19602.6  | 2915  | noncoding | -       |
| MSTRG.19604.6  | 6140  | coding    | PF00270 |
| MSTRG.19604.4  | 6110  | coding    | PF00270 |
| MSTRG.19604.8  | 5765  | coding    | PF00270 |
| MSTRG.19622.1  | 2606  | noncoding | -       |
| MSTRG.19624.7  | 4878  | coding    | PF00012 |

|               |       |           |         |
|---------------|-------|-----------|---------|
| MSTRG.19624.9 | 4881  | coding    | PF00012 |
| MSTRG.19616.2 | 10178 | coding    | PF02761 |
| MSTRG.19614.1 | 2890  | coding    | PF08205 |
| MSTRG.19614.2 | 2681  | coding    | PF08205 |
| MSTRG.19629.1 | 3810  | coding    | PF00443 |
| MSTRG.19628.1 | 701   | noncoding | —       |
| MSTRG.19628.2 | 951   | noncoding | —       |
| MSTRG.19638.4 | 6246  | coding    | PF09128 |
| MSTRG.19638.2 | 7402  | coding    | PF09128 |
| MSTRG.19638.1 | 9495  | coding    | PF09128 |
| MSTRG.19639.1 | 3071  | noncoding | —       |
| MSTRG.19640.1 | 2527  | noncoding | —       |
| MSTRG.19642.5 | 4865  | noncoding | —       |
| MSTRG.19642.6 | 4982  | noncoding | —       |
| MSTRG.19642.7 | 4986  | noncoding | —       |
| MSTRG.19643.1 | 6308  | coding    | PF00094 |
| MSTRG.19648.1 | 6372  | coding    | PF14604 |
| MSTRG.19649.3 | 2348  | coding    | PF15261 |
| MSTRG.19650.1 | 233   | noncoding | —       |
| MSTRG.19671.9 | 2133  | coding    | PF16016 |
| MSTRG.19666.1 | 3900  | coding    | PF02023 |
| MSTRG.19672.2 | 1267  | coding    | PF00415 |
| MSTRG.19672.3 | 873   | noncoding | —       |
| MSTRG.19672.4 | 864   | noncoding | —       |
| MSTRG.19674.1 | 1418  | coding    | PF00005 |
| MSTRG.19675.1 | 1841  | noncoding | —       |
| MSTRG.19676.2 | 3252  | coding    | PF00794 |
| MSTRG.19678.5 | 5508  | noncoding | —       |
| MSTRG.19678.8 | 2728  | noncoding | —       |
| MSTRG.19681.1 | 5029  | noncoding | —       |
| MSTRG.19682.1 | 1009  | noncoding | —       |
| MSTRG.19683.1 | 1365  | noncoding | —       |
| MSTRG.19684.1 | 2811  | coding    | PF00505 |
| MSTRG.19684.2 | 2839  | coding    | PF00505 |
| MSTRG.19701.1 | 740   | noncoding | —       |
| MSTRG.19707.2 | 3704  | coding    | PF00233 |
| MSTRG.19708.1 | 902   | noncoding | —       |
| MSTRG.19707.3 | 3552  | noncoding | —       |
| MSTRG.19713.2 | 1331  | coding    | PF00227 |
| MSTRG.19718.1 | 1945  | noncoding | —       |
| MSTRG.19720.3 | 6402  | coding    | PF00071 |
| MSTRG.19721.1 | 3667  | noncoding | —       |
| MSTRG.19720.4 | 9077  | coding    | PF00071 |
| MSTRG.19720.5 | 6695  | noncoding | —       |
| MSTRG.19722.1 | 3682  | coding    | PF06468 |
| MSTRG.19723.1 | 6516  | coding    | PF07993 |
| MSTRG.19723.4 | 4375  | coding    | PF03015 |
| MSTRG.19723.3 | 2909  | coding    | PF07993 |
| MSTRG.19723.5 | 2326  | coding    | PF07993 |
| MSTRG.19723.6 | 1893  | coding    | PF07993 |
| MSTRG.19733.1 | 3484  | coding    | PF12130 |
| MSTRG.19743.1 | 528   | noncoding | —       |
| MSTRG.19744.2 | 1532  | noncoding | —       |
| MSTRG.19744.4 | 796   | noncoding | —       |

|                  |       |           |         |
|------------------|-------|-----------|---------|
| MSTRG. 19744. 5  | 2721  | noncoding | -       |
| MSTRG. 19744. 6  | 1708  | noncoding | -       |
| MSTRG. 19744. 7  | 237   | noncoding | -       |
| MSTRG. 19744. 8  | 893   | noncoding | -       |
| MSTRG. 19744. 9  | 701   | noncoding | -       |
| MSTRG. 19744. 10 | 620   | noncoding | -       |
| MSTRG. 19744. 11 | 300   | noncoding | -       |
| MSTRG. 19744. 12 | 275   | noncoding | -       |
| MSTRG. 19744. 13 | 368   | noncoding | -       |
| MSTRG. 19744. 14 | 476   | noncoding | -       |
| MSTRG. 19744. 15 | 1142  | noncoding | -       |
| MSTRG. 19744. 16 | 213   | noncoding | -       |
| MSTRG. 19744. 17 | 223   | noncoding | -       |
| MSTRG. 19744. 18 | 213   | noncoding | -       |
| MSTRG. 19744. 19 | 211   | noncoding | -       |
| MSTRG. 19744. 20 | 304   | noncoding | -       |
| MSTRG. 19744. 21 | 217   | noncoding | -       |
| MSTRG. 19744. 22 | 219   | noncoding | -       |
| MSTRG. 19744. 23 | 237   | noncoding | -       |
| MSTRG. 19744. 24 | 223   | noncoding | -       |
| MSTRG. 19744. 25 | 222   | noncoding | -       |
| MSTRG. 19744. 26 | 227   | noncoding | -       |
| MSTRG. 19744. 27 | 258   | noncoding | -       |
| MSTRG. 19744. 28 | 301   | noncoding | -       |
| MSTRG. 19744. 29 | 210   | noncoding | -       |
| MSTRG. 19744. 30 | 328   | noncoding | -       |
| MSTRG. 19744. 31 | 205   | noncoding | -       |
| MSTRG. 19744. 32 | 201   | noncoding | -       |
| MSTRG. 19739. 1  | 537   | noncoding | -       |
| MSTRG. 19751. 1  | 8008  | noncoding | -       |
| MSTRG. 19752. 1  | 3109  | noncoding | -       |
| MSTRG. 19752. 2  | 1371  | noncoding | -       |
| MSTRG. 19751. 2  | 2028  | noncoding | -       |
| MSTRG. 19751. 3  | 772   | noncoding | -       |
| MSTRG. 19755. 1  | 5202  | coding    | PF02854 |
| MSTRG. 19755. 2  | 3897  | coding    | PF02854 |
| MSTRG. 19755. 3  | 4338  | coding    | PF02854 |
| MSTRG. 19755. 4  | 3697  | coding    | PF02854 |
| MSTRG. 19755. 5  | 3685  | coding    | PF02854 |
| MSTRG. 19761. 1  | 2765  | noncoding | -       |
| MSTRG. 19765. 1  | 757   | noncoding | -       |
| MSTRG. 19766. 1  | 2624  | noncoding | -       |
| MSTRG. 19767. 3  | 1701  | coding    | PF12335 |
| MSTRG. 19768. 1  | 3589  | noncoding | -       |
| MSTRG. 19757. 2  | 1835  | noncoding | -       |
| MSTRG. 19774. 1  | 3785  | coding    | PF03810 |
| MSTRG. 19779. 2  | 3988  | noncoding | -       |
| MSTRG. 19784. 2  | 1830  | coding    | PF15057 |
| MSTRG. 19785. 3  | 818   | noncoding | -       |
| MSTRG. 19788. 1  | 10372 | noncoding | -       |
| MSTRG. 19791. 1  | 1315  | noncoding | -       |
| MSTRG. 19803. 2  | 7967  | coding    | PF02994 |
| MSTRG. 19803. 6  | 3049  | coding    | PF07647 |
| MSTRG. 19803. 7  | 3117  | noncoding | -       |

|                |       |           |         |
|----------------|-------|-----------|---------|
| MSTRG.19803.5  | 3303  | noncoding | -       |
| MSTRG.19804.1  | 890   | noncoding | -       |
| MSTRG.19805.1  | 4168  | coding    | PF02191 |
| MSTRG.19806.1  | 996   | noncoding | -       |
| MSTRG.19807.3  | 1698  | coding    | PF00168 |
| MSTRG.19809.1  | 268   | noncoding | -       |
| MSTRG.19811.1  | 1381  | noncoding | -       |
| MSTRG.19821.1  | 2602  | coding    | PF13853 |
| MSTRG.19822.1  | 499   | noncoding | -       |
| MSTRG.19821.2  | 1386  | coding    | PF13853 |
| MSTRG.19821.3  | 4928  | noncoding | -       |
| MSTRG.19821.4  | 2299  | coding    | PF13853 |
| MSTRG.19821.5  | 19256 | noncoding | -       |
| MSTRG.19821.7  | 15392 | noncoding | -       |
| MSTRG.19821.6  | 7427  | noncoding | -       |
| MSTRG.19821.8  | 2146  | coding    | PF13853 |
| MSTRG.19821.9  | 439   | noncoding | -       |
| MSTRG.19825.1  | 922   | noncoding | -       |
| MSTRG.19827.1  | 702   | coding    | PF01196 |
| MSTRG.19831.2  | 11021 | coding    | PF01196 |
| MSTRG.19840.1  | 1172  | noncoding | -       |
| MSTRG.19841.1  | 14445 | noncoding | -       |
| MSTRG.19848.2  | 2350  | noncoding | -       |
| MSTRG.19856.8  | 2261  | coding    | PF10257 |
| MSTRG.19856.9  | 2246  | coding    | PF10257 |
| MSTRG.19856.11 | 11569 | coding    | PF15668 |
| MSTRG.19857.2  | 1038  | coding    | PF15668 |
| MSTRG.19861.2  | 2469  | coding    | PF15227 |
| MSTRG.19863.3  | 1901  | coding    | PF15227 |
| MSTRG.19863.2  | 2279  | coding    | PF15227 |
| MSTRG.19863.4  | 2739  | coding    | PF15227 |
| MSTRG.19868.1  | 775   | noncoding | -       |
| MSTRG.19868.2  | 635   | noncoding | -       |
| MSTRG.19879.1  | 844   | noncoding | -       |
| MSTRG.19884.1  | 7871  | coding    | PF06817 |
| MSTRG.19884.2  | 464   | noncoding | -       |
| MSTRG.19884.3  | 2345  | noncoding | -       |
| MSTRG.19884.4  | 1492  | noncoding | -       |
| MSTRG.19885.1  | 1973  | coding    | PF00517 |
| MSTRG.19888.1  | 394   | noncoding | -       |
| MSTRG.19893.3  | 3466  | coding    | PF13765 |
| MSTRG.19906.4  | 3838  | coding    | PF16533 |
| MSTRG.19907.1  | 1151  | noncoding | -       |
| MSTRG.19908.2  | 1298  | coding    | PF00071 |
| MSTRG.19909.5  | 2281  | coding    | PF10277 |
| MSTRG.19909.7  | 3391  | coding    | PF10277 |
| MSTRG.19909.6  | 1926  | coding    | PF10277 |
| MSTRG.19904.1  | 1444  | coding    | PF01129 |
| MSTRG.19904.2  | 1602  | coding    | PF01129 |
| MSTRG.19904.3  | 1121  | coding    | PF01129 |
| MSTRG.19905.1  | 1634  | noncoding | -       |
| MSTRG.19905.2  | 1382  | noncoding | -       |
| MSTRG.19917.1  | 3103  | coding    | PF01834 |
| MSTRG.19918.3  | 5389  | noncoding | -       |

|                  |       |           |         |
|------------------|-------|-----------|---------|
| MSTRG. 19912. 3  | 861   | coding    | PF15243 |
| MSTRG. 19912. 4  | 884   | coding    | PF15243 |
| MSTRG. 19913. 2  | 936   | coding    | PF03024 |
| MSTRG. 19914. 2  | 4933  | coding    | PF07647 |
| MSTRG. 19923. 1  | 462   | noncoding | —       |
| MSTRG. 19924. 1  | 673   | noncoding | —       |
| MSTRG. 19924. 2  | 831   | noncoding | —       |
| MSTRG. 19925. 3  | 5379  | coding    | PF00620 |
| MSTRG. 19925. 5  | 2992  | coding    | PF00620 |
| MSTRG. 19926. 5  | 1182  | coding    | PF01852 |
| MSTRG. 19926. 4  | 1248  | coding    | PF01852 |
| MSTRG. 19926. 3  | 1613  | coding    | PF01852 |
| MSTRG. 19930. 1  | 6170  | noncoding | —       |
| MSTRG. 19931. 1  | 462   | noncoding | —       |
| MSTRG. 19937. 1  | 1741  | noncoding | —       |
| MSTRG. 19938. 1  | 1036  | noncoding | —       |
| MSTRG. 19939. 4  | 1521  | noncoding | —       |
| MSTRG. 19941. 1  | 965   | coding    | PF00338 |
| MSTRG. 19951. 1  | 911   | noncoding | —       |
| MSTRG. 19954. 2  | 1257  | coding    | PF01556 |
| MSTRG. 19958. 1  | 3883  | noncoding | —       |
| MSTRG. 19959. 1  | 8118  | noncoding | —       |
| MSTRG. 19959. 3  | 7615  | noncoding | —       |
| MSTRG. 19959. 5  | 8083  | noncoding | —       |
| MSTRG. 19959. 2  | 8013  | noncoding | —       |
| MSTRG. 19959. 8  | 7068  | noncoding | —       |
| MSTRG. 19959. 9  | 8160  | noncoding | —       |
| MSTRG. 19959. 10 | 7060  | noncoding | —       |
| MSTRG. 19959. 11 | 8274  | noncoding | —       |
| MSTRG. 19959. 12 | 6932  | noncoding | —       |
| MSTRG. 19959. 13 | 6163  | noncoding | —       |
| MSTRG. 19942. 1  | 5893  | coding    | PF02878 |
| MSTRG. 19945. 1  | 1319  | noncoding | —       |
| MSTRG. 19947. 1  | 859   | noncoding | —       |
| MSTRG. 19946. 2  | 5399  | noncoding | —       |
| MSTRG. 19967. 1  | 27195 | noncoding | —       |
| MSTRG. 19967. 5  | 5841  | noncoding | —       |
| MSTRG. 19967. 4  | 10227 | noncoding | —       |
| MSTRG. 19967. 8  | 1564  | noncoding | —       |
| MSTRG. 19965. 2  | 4051  | coding    | PF03137 |
| MSTRG. 19978. 1  | 2652  | coding    | PF03009 |
| MSTRG. 19978. 3  | 2947  | coding    | PF03009 |
| MSTRG. 19978. 2  | 2979  | coding    | PF03009 |
| MSTRG. 19978. 4  | 3102  | coding    | PF03009 |
| MSTRG. 19978. 5  | 2777  | coding    | PF03009 |
| MSTRG. 19979. 1  | 4170  | noncoding | —       |
| MSTRG. 19980. 1  | 1969  | coding    | PF00079 |
| MSTRG. 19983. 1  | 3799  | noncoding | —       |
| MSTRG. 19985. 1  | 7334  | coding    | PF03982 |
| MSTRG. 19981. 1  | 595   | noncoding | —       |
| MSTRG. 19990. 1  | 1885  | noncoding | —       |
| MSTRG. 19990. 2  | 857   | noncoding | —       |
| MSTRG. 20000. 1  | 1889  | noncoding | —       |
| MSTRG. 20003. 1  | 4946  | noncoding | —       |

|                |      |           |         |
|----------------|------|-----------|---------|
| MSTRG.20006.1  | 680  | noncoding | -       |
| MSTRG.20008.1  | 689  | noncoding | -       |
| MSTRG.20013.4  | 7005 | coding    | PF00063 |
| MSTRG.20013.5  | 5216 | noncoding | -       |
| MSTRG.20015.3  | 2221 | noncoding | -       |
| MSTRG.20015.5  | 2064 | noncoding | -       |
| MSTRG.20015.6  | 3755 | noncoding | -       |
| MSTRG.20018.1  | 1382 | noncoding | -       |
| MSTRG.20018.2  | 1252 | noncoding | -       |
| MSTRG.20018.3  | 1448 | noncoding | -       |
| MSTRG.20027.1  | 4142 | coding    | PF01795 |
| MSTRG.20033.1  | 1880 | noncoding | -       |
| MSTRG.20037.1  | 856  | noncoding | -       |
| MSTRG.20038.4  | 1332 | noncoding | -       |
| MSTRG.20047.1  | 2863 | noncoding | -       |
| MSTRG.20056.1  | 1199 | coding    | PF14949 |
| MSTRG.20056.4  | 1870 | coding    | PF14949 |
| MSTRG.20057.3  | 1273 | noncoding | -       |
| MSTRG.20057.4  | 1052 | noncoding | -       |
| MSTRG.20059.1  | 5773 | noncoding | -       |
| MSTRG.20059.5  | 1884 | noncoding | -       |
| MSTRG.20061.3  | 1684 | noncoding | -       |
| MSTRG.20061.2  | 2311 | noncoding | -       |
| MSTRG.20063.1  | 848  | noncoding | -       |
| MSTRG.20066.1  | 975  | noncoding | -       |
| MSTRG.20069.4  | 974  | noncoding | -       |
| MSTRG.20074.2  | 2763 | coding    | PF02165 |
| MSTRG.20074.4  | 2712 | coding    | PF02165 |
| MSTRG.20075.1  | 2309 | noncoding | -       |
| MSTRG.20079.1  | 4183 | coding    | PF15818 |
| MSTRG.20086.5  | 6108 | noncoding | -       |
| MSTRG.20086.6  | 8748 | noncoding | -       |
| MSTRG.20086.9  | 6370 | noncoding | -       |
| MSTRG.20087.1  | 6840 | noncoding | -       |
| MSTRG.20086.10 | 6721 | noncoding | -       |
| MSTRG.20088.2  | 1247 | noncoding | -       |
| MSTRG.20090.1  | 442  | noncoding | -       |
| MSTRG.20092.2  | 2661 | coding    | PF05843 |
| MSTRG.20094.2  | 3840 | noncoding | -       |
| MSTRG.20097.2  | 2119 | coding    | PF04379 |
| MSTRG.20098.1  | 6857 | noncoding | -       |
| MSTRG.20107.1  | 565  | noncoding | -       |
| MSTRG.20109.1  | 3131 | noncoding | -       |
| MSTRG.20110.1  | 1587 | coding    | PF00178 |
| MSTRG.20110.2  | 1363 | coding    | PF00178 |
| MSTRG.20110.3  | 4983 | coding    | PF00178 |
| MSTRG.20114.1  | 2317 | coding    | PF00198 |
| MSTRG.20114.2  | 1600 | coding    | PF00198 |
| MSTRG.20114.4  | 2328 | coding    | PF00198 |
| MSTRG.20115.1  | 6913 | noncoding | -       |
| MSTRG.20112.1  | 310  | noncoding | -       |
| MSTRG.20118.1  | 398  | noncoding | -       |
| MSTRG.20117.3  | 2502 | coding    | PF00193 |
| MSTRG.20121.2  | 1462 | noncoding | -       |



|               |       |           |         |
|---------------|-------|-----------|---------|
| MSTRG.20121.1 | 1881  | noncoding | –       |
| MSTRG.20119.1 | 872   | noncoding | –       |
| MSTRG.20120.1 | 2688  | coding    | PF00089 |
| MSTRG.20126.2 | 3901  | noncoding | –       |
| MSTRG.20126.4 | 1126  | noncoding | –       |
| MSTRG.20126.3 | 3922  | noncoding | –       |
| MSTRG.20128.2 | 1095  | coding    | PF07258 |
| MSTRG.20132.3 | 1058  | noncoding | –       |
| MSTRG.20132.4 | 1479  | noncoding | –       |
| MSTRG.20135.1 | 2710  | coding    | PF13855 |
| MSTRG.20148.1 | 2016  | coding    | PF00517 |
| MSTRG.20158.1 | 592   | noncoding | –       |
| MSTRG.20158.2 | 626   | noncoding | –       |
| MSTRG.20158.5 | 4113  | coding    | PF05918 |
| MSTRG.20158.6 | 2146  | noncoding | –       |
| MSTRG.20162.4 | 4436  | noncoding | –       |
| MSTRG.20163.1 | 1181  | noncoding | –       |
| MSTRG.20164.1 | 2273  | noncoding | –       |
| MSTRG.20168.1 | 11743 | noncoding | –       |
| MSTRG.20154.2 | 2884  | coding    | PF00106 |
| MSTRG.20155.1 | 7367  | noncoding | –       |
| MSTRG.20156.1 | 7982  | noncoding | –       |
| MSTRG.20157.1 | 4496  | noncoding | –       |
| MSTRG.20154.3 | 4790  | coding    | PF00106 |
| MSTRG.20172.3 | 1668  | noncoding | –       |
| MSTRG.20173.1 | 2419  | noncoding | –       |
| MSTRG.20177.2 | 1872  | coding    | PF09258 |
| MSTRG.20179.1 | 635   | noncoding | –       |
| MSTRG.20180.1 | 385   | noncoding | –       |
| MSTRG.20186.1 | 3226  | coding    | PF13873 |
| MSTRG.20188.1 | 1239  | noncoding | –       |
| MSTRG.20189.2 | 336   | noncoding | –       |
| MSTRG.20189.1 | 395   | noncoding | –       |
| MSTRG.20190.1 | 413   | noncoding | –       |
| MSTRG.20193.2 | 19034 | noncoding | –       |
| MSTRG.20193.3 | 26598 | coding    | PF14915 |
| MSTRG.20198.2 | 4055  | coding    | PF03441 |
| MSTRG.20198.1 | 5302  | coding    | PF03441 |
| MSTRG.20199.1 | 571   | noncoding | –       |
| MSTRG.20200.3 | 2515  | coding    | PF00640 |
| MSTRG.20202.1 | 715   | noncoding | –       |
| MSTRG.20203.2 | 2421  | coding    | PF08610 |
| MSTRG.20210.4 | 4147  | coding    | PF00628 |
| MSTRG.20210.3 | 3375  | coding    | PF00628 |
| MSTRG.20210.5 | 25454 | noncoding | –       |
| MSTRG.20210.6 | 12562 | noncoding | –       |
| MSTRG.20212.1 | 4608  | noncoding | –       |
| MSTRG.20212.2 | 10213 | noncoding | –       |
| MSTRG.20212.3 | 1385  | noncoding | –       |
| MSTRG.20212.4 | 3897  | noncoding | –       |
| MSTRG.20210.7 | 903   | noncoding | –       |
| MSTRG.20207.2 | 2685  | noncoding | –       |
| MSTRG.20207.3 | 1621  | noncoding | –       |
| MSTRG.20207.4 | 1772  | noncoding | –       |

|                  |       |           |         |
|------------------|-------|-----------|---------|
| MSTRG. 20208. 3  | 5441  | coding    | PF00609 |
| MSTRG. 20213. 5  | 6732  | noncoding | —       |
| MSTRG. 20213. 6  | 4498  | noncoding | —       |
| MSTRG. 20214. 1  | 4258  | noncoding | —       |
| MSTRG. 20215. 1  | 723   | noncoding | —       |
| MSTRG. 20216. 1  | 6665  | noncoding | —       |
| MSTRG. 20218. 4  | 4149  | noncoding | —       |
| MSTRG. 20218. 5  | 4189  | noncoding | —       |
| MSTRG. 20220. 1  | 3381  | noncoding | —       |
| MSTRG. 20225. 1  | 997   | coding    | PF09396 |
| MSTRG. 20225. 2  | 793   | noncoding | —       |
| MSTRG. 20226. 2  | 1307  | coding    | PF00089 |
| MSTRG. 20226. 3  | 1602  | coding    | PF00089 |
| MSTRG. 20226. 4  | 1269  | coding    | PF00089 |
| MSTRG. 20227. 6  | 6505  | noncoding | —       |
| MSTRG. 20227. 5  | 7465  | noncoding | —       |
| MSTRG. 20227. 3  | 7278  | noncoding | —       |
| MSTRG. 20227. 4  | 7275  | noncoding | —       |
| MSTRG. 20227. 8  | 9411  | noncoding | —       |
| MSTRG. 20227. 10 | 7457  | noncoding | —       |
| MSTRG. 20227. 9  | 6865  | noncoding | —       |
| MSTRG. 20227. 11 | 7893  | noncoding | —       |
| MSTRG. 20227. 12 | 7042  | noncoding | —       |
| MSTRG. 20228. 1  | 495   | noncoding | —       |
| MSTRG. 20229. 1  | 7998  | coding    | PF14670 |
| MSTRG. 20222. 3  | 1400  | noncoding | —       |
| MSTRG. 20222. 4  | 1035  | noncoding | —       |
| MSTRG. 20223. 1  | 7173  | coding    | PF01412 |
| MSTRG. 20223. 2  | 4625  | coding    | PF01412 |
| MSTRG. 20241. 1  | 5417  | coding    | PF02141 |
| MSTRG. 20241. 2  | 5375  | coding    | PF02141 |
| MSTRG. 20241. 3  | 5281  | coding    | PF02141 |
| MSTRG. 20241. 5  | 5120  | coding    | PF02141 |
| MSTRG. 20241. 4  | 6165  | coding    | PF02141 |
| MSTRG. 20241. 6  | 5034  | coding    | PF02141 |
| MSTRG. 20231. 1  | 1703  | noncoding | —       |
| MSTRG. 20231. 2  | 1357  | noncoding | —       |
| MSTRG. 20232. 1  | 507   | noncoding | —       |
| MSTRG. 20233. 1  | 2172  | coding    | PF02535 |
| MSTRG. 20242. 4  | 7675  | coding    | PF00076 |
| MSTRG. 20242. 1  | 4547  | coding    | PF00076 |
| MSTRG. 20242. 2  | 4535  | coding    | PF00076 |
| MSTRG. 20242. 3  | 4835  | coding    | PF00076 |
| MSTRG. 20242. 5  | 7976  | coding    | PF00076 |
| MSTRG. 20242. 8  | 7846  | coding    | PF00076 |
| MSTRG. 20244. 2  | 2794  | coding    | PF00651 |
| MSTRG. 20245. 1  | 2173  | coding    | PF00329 |
| MSTRG. 20246. 1  | 13824 | noncoding | —       |
| MSTRG. 20246. 3  | 1773  | noncoding | —       |
| MSTRG. 20249. 4  | 4189  | noncoding | —       |
| MSTRG. 20250. 2  | 4516  | noncoding | —       |
| MSTRG. 20250. 4  | 4754  | noncoding | —       |
| MSTRG. 20250. 7  | 4953  | noncoding | —       |
| MSTRG. 20250. 8  | 4008  | noncoding | —       |

|                  |      |           |         |
|------------------|------|-----------|---------|
| MSTRG. 20251. 1  | 966  | noncoding | –       |
| MSTRG. 20247. 1  | 7325 | coding    | PF00102 |
| MSTRG. 20247. 2  | 7402 | coding    | PF00102 |
| MSTRG. 20248. 1  | 1544 | noncoding | –       |
| MSTRG. 20257. 1  | 1483 | coding    | PF13853 |
| MSTRG. 20257. 2  | 739  | noncoding | –       |
| MSTRG. 20269. 2  | 4572 | coding    | PF15327 |
| MSTRG. 20270. 1  | 822  | noncoding | –       |
| MSTRG. 20270. 2  | 1053 | noncoding | –       |
| MSTRG. 20270. 3  | 966  | noncoding | –       |
| MSTRG. 20271. 2  | 3419 | coding    | PF03531 |
| MSTRG. 20272. 1  | 3735 | coding    | PF00864 |
| MSTRG. 20274. 1  | 423  | noncoding | –       |
| MSTRG. 20274. 5  | 2880 | noncoding | –       |
| MSTRG. 20274. 4  | 3041 | noncoding | –       |
| MSTRG. 20274. 6  | 2543 | noncoding | –       |
| MSTRG. 20277. 1  | 1921 | noncoding | –       |
| MSTRG. 20278. 2  | 1023 | coding    | PF00179 |
| MSTRG. 20279. 1  | 2167 | noncoding | –       |
| MSTRG. 20281. 2  | 2643 | coding    | PF16575 |
| MSTRG. 20281. 4  | 1991 | coding    | PF16575 |
| MSTRG. 20287. 3  | 4625 | coding    | PF01529 |
| MSTRG. 20288. 2  | 1845 | coding    | PF10278 |
| MSTRG. 20288. 3  | 1479 | coding    | PF10278 |
| MSTRG. 20290. 1  | 6843 | coding    | PF00651 |
| MSTRG. 20291. 3  | 834  | noncoding | –       |
| MSTRG. 20292. 1  | 4967 | noncoding | –       |
| MSTRG. 20292. 2  | 4982 | noncoding | –       |
| MSTRG. 20292. 3  | 5060 | noncoding | –       |
| MSTRG. 20292. 4  | 4740 | noncoding | –       |
| MSTRG. 20292. 7  | 5115 | noncoding | –       |
| MSTRG. 20293. 1  | 1600 | noncoding | –       |
| MSTRG. 20298. 3  | 4786 | noncoding | –       |
| MSTRG. 20298. 4  | 5632 | noncoding | –       |
| MSTRG. 20298. 5  | 4807 | noncoding | –       |
| MSTRG. 20298. 6  | 4782 | noncoding | –       |
| MSTRG. 20298. 7  | 5245 | noncoding | –       |
| MSTRG. 20299. 1  | 2807 | noncoding | –       |
| MSTRG. 20315. 2  | 7731 | coding    | PF01237 |
| MSTRG. 20315. 4  | 4281 | coding    | PF01237 |
| MSTRG. 20315. 6  | 3016 | coding    | PF01237 |
| MSTRG. 20315. 5  | 3393 | coding    | PF01237 |
| MSTRG. 20315. 7  | 1111 | noncoding | –       |
| MSTRG. 20315. 11 | 5507 | noncoding | –       |
| MSTRG. 20315. 14 | 5468 | noncoding | –       |
| MSTRG. 20315. 16 | 4234 | noncoding | –       |
| MSTRG. 20318. 1  | 581  | noncoding | –       |
| MSTRG. 20308. 1  | 911  | noncoding | –       |
| MSTRG. 20310. 1  | 3013 | coding    | PF00804 |
| MSTRG. 20313. 1  | 1071 | coding    | PF01122 |
| MSTRG. 20313. 2  | 1844 | coding    | PF01122 |
| MSTRG. 20313. 3  | 1806 | coding    | PF01122 |
| MSTRG. 20313. 4  | 528  | noncoding | –       |
| MSTRG. 20313. 5  | 941  | coding    | PF01122 |

|                  |       |           |         |
|------------------|-------|-----------|---------|
| MSTRG. 20334. 1  | 4028  | noncoding | -       |
| MSTRG. 20335. 3  | 549   | noncoding | -       |
| MSTRG. 20338. 1  | 3776  | noncoding | -       |
| MSTRG. 20338. 2  | 2480  | noncoding | -       |
| MSTRG. 20339. 3  | 1393  | noncoding | -       |
| MSTRG. 20339. 4  | 1546  | noncoding | -       |
| MSTRG. 20345. 2  | 5715  | coding    | PF03643 |
| MSTRG. 20346. 2  | 1005  | coding    | PF01878 |
| MSTRG. 20347. 4  | 1701  | coding    | PF00441 |
| MSTRG. 20321. 1  | 321   | noncoding | -       |
| MSTRG. 20328. 4  | 1211  | noncoding | -       |
| MSTRG. 20328. 5  | 980   | noncoding | -       |
| MSTRG. 20328. 6  | 1240  | noncoding | -       |
| MSTRG. 20330. 1  | 452   | noncoding | -       |
| MSTRG. 20332. 6  | 2976  | noncoding | -       |
| MSTRG. 20354. 1  | 312   | noncoding | -       |
| MSTRG. 20361. 1  | 327   | noncoding | -       |
| MSTRG. 20362. 1  | 549   | noncoding | -       |
| MSTRG. 20362. 2  | 1804  | noncoding | -       |
| MSTRG. 20362. 3  | 1074  | noncoding | -       |
| MSTRG. 20366. 1  | 2941  | noncoding | -       |
| MSTRG. 20367. 3  | 2145  | coding    | PF01359 |
| MSTRG. 20367. 4  | 2148  | coding    | PF01359 |
| MSTRG. 20367. 6  | 877   | noncoding | -       |
| MSTRG. 20367. 5  | 2122  | coding    | PF01359 |
| MSTRG. 20376. 4  | 2229  | noncoding | -       |
| MSTRG. 20376. 5  | 2731  | noncoding | -       |
| MSTRG. 20376. 7  | 2478  | coding    | PF00001 |
| MSTRG. 20376. 8  | 3691  | noncoding | -       |
| MSTRG. 20376. 6  | 12127 | noncoding | -       |
| MSTRG. 20376. 9  | 13832 | noncoding | -       |
| MSTRG. 20376. 10 | 27002 | noncoding | -       |
| MSTRG. 20378. 2  | 1800  | coding    | PF00704 |
| MSTRG. 20382. 3  | 8719  | coding    | PF12424 |
| MSTRG. 20382. 5  | 8752  | coding    | PF12424 |
| MSTRG. 20382. 8  | 4164  | coding    | PF12424 |
| MSTRG. 20387. 2  | 4997  | coding    | PF15663 |
| MSTRG. 20387. 8  | 1072  | noncoding | -       |
| MSTRG. 20387. 7  | 8916  | coding    | PF15663 |
| MSTRG. 20388. 1  | 948   | noncoding | -       |
| MSTRG. 20393. 1  | 1756  | noncoding | -       |
| MSTRG. 20394. 1  | 3944  | coding    | PF00505 |
| MSTRG. 20395. 1  | 6335  | coding    | PF01633 |
| MSTRG. 20395. 2  | 6167  | coding    | PF01633 |
| MSTRG. 20395. 3  | 5448  | coding    | PF01633 |
| MSTRG. 20395. 4  | 5810  | coding    | PF01633 |
| MSTRG. 20395. 14 | 2757  | coding    | PF01633 |
| MSTRG. 20395. 10 | 2544  | coding    | PF01633 |
| MSTRG. 20395. 11 | 2485  | coding    | PF01633 |
| MSTRG. 20395. 7  | 2544  | coding    | PF01633 |
| MSTRG. 20395. 8  | 2649  | coding    | PF01633 |
| MSTRG. 20395. 12 | 3014  | coding    | PF01633 |
| MSTRG. 20395. 13 | 2593  | coding    | PF01633 |
| MSTRG. 20395. 9  | 2367  | coding    | PF01633 |

|                 |       |           |         |
|-----------------|-------|-----------|---------|
| MSTRG. 20396. 1 | 2277  | coding    | PF00026 |
| MSTRG. 20397. 1 | 1884  | coding    | PF00026 |
| MSTRG. 20396. 2 | 2224  | coding    | PF00026 |
| MSTRG. 20396. 3 | 2070  | coding    | PF00026 |
| MSTRG. 20396. 4 | 1824  | coding    | PF00026 |
| MSTRG. 20390. 2 | 5109  | coding    | PF10472 |
| MSTRG. 20392. 1 | 7055  | coding    | PF00613 |
| MSTRG. 20400. 7 | 657   | noncoding | —       |
| MSTRG. 20401. 1 | 1732  | noncoding | —       |
| MSTRG. 20402. 1 | 1375  | noncoding | —       |
| MSTRG. 20403. 1 | 1203  | noncoding | —       |
| MSTRG. 20407. 1 | 4555  | noncoding | —       |
| MSTRG. 20414. 2 | 2845  | coding    | PF00069 |
| MSTRG. 20415. 1 | 2112  | noncoding | —       |
| MSTRG. 20416. 1 | 4047  | coding    | PF00069 |
| MSTRG. 20421. 1 | 2505  | coding    | PF00178 |
| MSTRG. 20421. 2 | 1954  | coding    | PF00178 |
| MSTRG. 20421. 3 | 5123  | coding    | PF00178 |
| MSTRG. 20424. 1 | 1337  | noncoding | —       |
| MSTRG. 20426. 1 | 4945  | noncoding | —       |
| MSTRG. 20426. 2 | 4655  | noncoding | —       |
| MSTRG. 20429. 2 | 777   | coding    | PF00071 |
| MSTRG. 20430. 1 | 204   | noncoding | —       |
| MSTRG. 20433. 4 | 3560  | coding    | PF00620 |
| MSTRG. 20434. 1 | 5323  | noncoding | —       |
| MSTRG. 20433. 7 | 1312  | noncoding | —       |
| MSTRG. 20431. 2 | 4535  | noncoding | —       |
| MSTRG. 20431. 3 | 1576  | noncoding | —       |
| MSTRG. 20431. 4 | 4388  | noncoding | —       |
| MSTRG. 20438. 4 | 1319  | coding    | PF00069 |
| MSTRG. 20439. 1 | 15062 | coding    | PF00069 |
| MSTRG. 20439. 2 | 5018  | coding    | PF00069 |
| MSTRG. 20439. 3 | 3005  | noncoding | —       |
| MSTRG. 20440. 1 | 12225 | noncoding | —       |
| MSTRG. 20440. 2 | 5872  | noncoding | —       |
| MSTRG. 20446. 2 | 2186  | coding    | PF07686 |
| MSTRG. 20451. 2 | 10263 | coding    | PF01591 |
| MSTRG. 20452. 1 | 292   | noncoding | —       |
| MSTRG. 20453. 1 | 2197  | coding    | PF00084 |
| MSTRG. 20455. 2 | 1068  | noncoding | —       |
| MSTRG. 20457. 2 | 3257  | noncoding | —       |
| MSTRG. 20457. 4 | 4749  | noncoding | —       |
| MSTRG. 20457. 7 | 3228  | noncoding | —       |
| MSTRG. 20457. 6 | 3904  | noncoding | —       |
| MSTRG. 20457. 8 | 2394  | noncoding | —       |
| MSTRG. 20469. 1 | 988   | noncoding | —       |
| MSTRG. 20469. 2 | 1075  | noncoding | —       |
| MSTRG. 20471. 1 | 3702  | noncoding | —       |
| MSTRG. 20471. 2 | 1573  | noncoding | —       |
| MSTRG. 20473. 2 | 811   | noncoding | —       |
| MSTRG. 20474. 1 | 298   | noncoding | —       |
| MSTRG. 20476. 1 | 677   | noncoding | —       |
| MSTRG. 20482. 6 | 3990  | noncoding | —       |
| MSTRG. 20483. 1 | 8118  | noncoding | —       |

|               |       |           |         |
|---------------|-------|-----------|---------|
| MSTRG.20484.1 | 3180  | noncoding | -       |
| MSTRG.20486.1 | 1001  | noncoding | -       |
| MSTRG.20479.1 | 703   | noncoding | -       |
| MSTRG.20489.1 | 2951  | noncoding | -       |
| MSTRG.20504.2 | 991   | noncoding | -       |
| MSTRG.20505.1 | 3616  | coding    | PF05731 |
| MSTRG.20506.1 | 1498  | coding    | PF01088 |
| MSTRG.20512.1 | 5212  | coding    | PF09762 |
| MSTRG.20512.2 | 668   | noncoding | -       |
| MSTRG.20512.3 | 1900  | noncoding | -       |
| MSTRG.20512.4 | 1543  | noncoding | -       |
| MSTRG.20512.5 | 3974  | noncoding | -       |
| MSTRG.20512.6 | 1685  | noncoding | -       |
| MSTRG.20514.1 | 441   | noncoding | -       |
| MSTRG.20516.1 | 222   | noncoding | -       |
| MSTRG.20526.1 | 2703  | noncoding | -       |
| MSTRG.20528.1 | 4369  | noncoding | -       |
| MSTRG.20547.1 | 1154  | noncoding | -       |
| MSTRG.20552.1 | 650   | noncoding | -       |
| MSTRG.20565.1 | 395   | noncoding | -       |
| MSTRG.20566.1 | 1251  | noncoding | -       |
| MSTRG.20568.2 | 3106  | coding    | PF02214 |
| MSTRG.20569.1 | 486   | noncoding | -       |
| MSTRG.20570.1 | 540   | noncoding | -       |
| MSTRG.20571.1 | 1668  | noncoding | -       |
| MSTRG.20574.1 | 968   | noncoding | -       |
| MSTRG.20577.2 | 3852  | coding    | PF00105 |
| MSTRG.20577.3 | 2433  | noncoding | -       |
| MSTRG.20579.2 | 4341  | coding    | PF01585 |
| MSTRG.20579.4 | 4846  | coding    | PF01585 |
| MSTRG.20580.1 | 1232  | noncoding | -       |
| MSTRG.20581.1 | 2709  | noncoding | -       |
| MSTRG.20583.1 | 6247  | noncoding | -       |
| MSTRG.20584.1 | 820   | noncoding | -       |
| MSTRG.20593.2 | 7179  | noncoding | -       |
| MSTRG.20593.3 | 3061  | noncoding | -       |
| MSTRG.20608.7 | 1934  | coding    | PF00069 |
| MSTRG.20608.6 | 4264  | coding    | PF00069 |
| MSTRG.20609.1 | 8063  | coding    | PF02994 |
| MSTRG.20610.1 | 10253 | noncoding | -       |
| MSTRG.20608.8 | 5779  | coding    | PF00069 |
| MSTRG.20611.1 | 3372  | coding    | PF02994 |
| MSTRG.20612.1 | 5346  | noncoding | -       |
| MSTRG.20608.9 | 10381 | coding    | PF00069 |
| MSTRG.20603.1 | 4484  | noncoding | -       |
| MSTRG.20603.2 | 3622  | noncoding | -       |
| MSTRG.20603.3 | 10394 | coding    | PF03476 |
| MSTRG.20613.1 | 1514  | coding    | PF00782 |
| MSTRG.20613.2 | 1424  | coding    | PF00782 |
| MSTRG.20614.1 | 346   | noncoding | -       |
| MSTRG.20616.1 | 516   | noncoding | -       |
| MSTRG.20618.2 | 2405  | noncoding | -       |
| MSTRG.20620.2 | 292   | noncoding | -       |
| MSTRG.20619.4 | 3387  | noncoding | -       |

|                |       |           |         |
|----------------|-------|-----------|---------|
| MSTRG.20621.1  | 8279  | coding    | PF14186 |
| MSTRG.20628.2  | 3761  | coding    | PF00648 |
| MSTRG.20629.1  | 322   | noncoding | —       |
| MSTRG.20629.2  | 368   | noncoding | —       |
| MSTRG.20631.2  | 2692  | noncoding | —       |
| MSTRG.20631.3  | 5980  | noncoding | —       |
| MSTRG.20634.1  | 3512  | coding    | PF00004 |
| MSTRG.20634.2  | 2801  | coding    | PF00004 |
| MSTRG.20634.3  | 1420  | noncoding | —       |
| MSTRG.20637.3  | 4275  | noncoding | —       |
| MSTRG.20637.5  | 2330  | coding    | PF00400 |
| MSTRG.20637.4  | 2850  | coding    | PF00400 |
| MSTRG.20638.1  | 1547  | noncoding | —       |
| MSTRG.20642.1  | 1613  | coding    | PF03311 |
| MSTRG.20654.1  | 252   | noncoding | —       |
| MSTRG.20654.2  | 14871 | coding    | PF03028 |
| MSTRG.20654.4  | 2471  | noncoding | —       |
| MSTRG.20654.3  | 2508  | noncoding | —       |
| MSTRG.20654.5  | 2114  | noncoding | —       |
| MSTRG.20654.12 | 1238  | noncoding | —       |
| MSTRG.20654.8  | 7290  | noncoding | —       |
| MSTRG.20654.10 | 3026  | noncoding | —       |
| MSTRG.20654.11 | 12817 | coding    | PF12774 |
| MSTRG.20654.9  | 12761 | coding    | PF12774 |
| MSTRG.20654.6  | 13939 | coding    | PF03028 |
| MSTRG.20654.7  | 14302 | coding    | PF03028 |
| MSTRG.20654.13 | 4094  | noncoding | —       |
| MSTRG.20656.1  | 8276  | noncoding | —       |
| MSTRG.20657.1  | 2255  | noncoding | —       |
| MSTRG.20658.1  | 1254  | noncoding | —       |
| MSTRG.20654.14 | 3684  | noncoding | —       |
| MSTRG.20660.2  | 3786  | coding    | PF01222 |
| MSTRG.20644.1  | 2774  | coding    | PF00568 |
| MSTRG.20644.3  | 6915  | coding    | PF00568 |
| MSTRG.20644.6  | 10352 | coding    | PF00568 |
| MSTRG.20646.1  | 2133  | coding    | PF06441 |
| MSTRG.20649.2  | 5244  | noncoding | —       |
| MSTRG.20649.3  | 3842  | noncoding | —       |
| MSTRG.20662.1  | 425   | noncoding | —       |
| MSTRG.20662.2  | 873   | noncoding | —       |
| MSTRG.20662.3  | 1069  | coding    | PF00125 |
| MSTRG.20662.4  | 1195  | coding    | PF00125 |
| MSTRG.20662.5  | 1159  | coding    | PF00125 |
| MSTRG.20662.6  | 1252  | coding    | PF00125 |
| MSTRG.20664.1  | 4391  | coding    | PF13897 |
| MSTRG.20664.2  | 3915  | coding    | PF13897 |
| MSTRG.20667.2  | 1673  | noncoding | —       |
| MSTRG.20668.1  | 1013  | coding    | PF13656 |
| MSTRG.20669.2  | 5350  | noncoding | —       |
| MSTRG.20670.1  | 10076 | noncoding | —       |
| MSTRG.20672.6  | 2803  | coding    | PF01080 |
| MSTRG.20672.8  | 4147  | coding    | PF01080 |
| MSTRG.20674.1  | 11126 | coding    | PF00780 |
| MSTRG.20674.3  | 10189 | coding    | PF00780 |

|                |       |           |         |
|----------------|-------|-----------|---------|
| MSTRG.20674.5  | 7206  | coding    | PF00780 |
| MSTRG.20674.6  | 2283  | noncoding | —       |
| MSTRG.20678.2  | 7076  | coding    | PF16687 |
| MSTRG.20678.3  | 934   | coding    | PF16687 |
| MSTRG.20678.4  | 7086  | coding    | PF16687 |
| MSTRG.20679.1  | 1231  | noncoding | —       |
| MSTRG.20677.1  | 7969  | noncoding | —       |
| MSTRG.20681.1  | 563   | noncoding | —       |
| MSTRG.20682.1  | 485   | noncoding | —       |
| MSTRG.20682.2  | 507   | noncoding | —       |
| MSTRG.20688.2  | 3126  | noncoding | —       |
| MSTRG.20705.1  | 821   | noncoding | —       |
| MSTRG.20705.2  | 710   | noncoding | —       |
| MSTRG.20710.3  | 4078  | coding    | PF05903 |
| MSTRG.20710.5  | 10269 | noncoding | —       |
| MSTRG.20711.1  | 862   | noncoding | —       |
| MSTRG.20713.1  | 1731  | noncoding | —       |
| MSTRG.20708.2  | 2723  | coding    | PF00709 |
| MSTRG.20709.1  | 628   | noncoding | —       |
| MSTRG.20714.1  | 3158  | coding    | PF00651 |
| MSTRG.20725.3  | 15327 | noncoding | —       |
| MSTRG.20725.5  | 2400  | noncoding | —       |
| MSTRG.20725.4  | 3766  | coding    | PF00069 |
| MSTRG.20725.6  | 3881  | coding    | PF00069 |
| MSTRG.20725.7  | 275   | noncoding | —       |
| MSTRG.20725.8  | 3930  | coding    | PF00069 |
| MSTRG.20725.9  | 3970  | coding    | PF00078 |
| MSTRG.20725.10 | 9170  | noncoding | —       |
| MSTRG.20725.11 | 7240  | coding    | PF00069 |
| MSTRG.20725.12 | 4858  | coding    | PF01359 |
| MSTRG.20725.14 | 2826  | coding    | PF00078 |
| MSTRG.20726.1  | 5275  | noncoding | —       |
| MSTRG.20727.1  | 3102  | noncoding | —       |
| MSTRG.20728.1  | 5172  | noncoding | —       |
| MSTRG.20730.12 | 1449  | noncoding | —       |
| MSTRG.20730.6  | 3939  | coding    | PF15308 |
| MSTRG.20730.8  | 5034  | coding    | PF15308 |
| MSTRG.20730.11 | 5176  | coding    | PF15308 |
| MSTRG.20730.10 | 6718  | coding    | PF15308 |
| MSTRG.20730.7  | 6418  | coding    | PF15308 |
| MSTRG.20730.4  | 6336  | coding    | PF15308 |
| MSTRG.20730.5  | 6394  | coding    | PF15308 |
| MSTRG.20730.9  | 5314  | coding    | PF15308 |
| MSTRG.20730.13 | 3691  | coding    | PF15308 |
| MSTRG.20730.14 | 3178  | coding    | PF15308 |
| MSTRG.20718.1  | 949   | noncoding | —       |
| MSTRG.20720.2  | 435   | noncoding | —       |
| MSTRG.20734.1  | 8159  | noncoding | —       |
| MSTRG.20740.1  | 2858  | coding    | PF00287 |
| MSTRG.20742.2  | 1536  | noncoding | —       |
| MSTRG.20742.3  | 1756  | noncoding | —       |
| MSTRG.20742.4  | 1297  | noncoding | —       |
| MSTRG.20743.1  | 2182  | noncoding | —       |
| MSTRG.20746.1  | 2526  | noncoding | —       |



|                  |       |           |         |
|------------------|-------|-----------|---------|
| MSTRG. 20737. 1  | 1859  | coding    | PF00084 |
| MSTRG. 20737. 2  | 2578  | noncoding | –       |
| MSTRG. 20751. 2  | 1643  | noncoding | –       |
| MSTRG. 20753. 3  | 3306  | noncoding | –       |
| MSTRG. 20753. 4  | 3667  | noncoding | –       |
| MSTRG. 20750. 3  | 3983  | coding    | PF05804 |
| MSTRG. 20750. 1  | 3236  | coding    | PF05804 |
| MSTRG. 20758. 1  | 2198  | coding    | PF00743 |
| MSTRG. 20763. 10 | 729   | noncoding | –       |
| MSTRG. 20763. 8  | 8589  | coding    | PF07001 |
| MSTRG. 20763. 13 | 7956  | noncoding | –       |
| MSTRG. 20774. 1  | 8406  | noncoding | –       |
| MSTRG. 20775. 4  | 2342  | coding    | PF01031 |
| MSTRG. 20775. 6  | 2267  | coding    | PF01031 |
| MSTRG. 20775. 7  | 11435 | coding    | PF01031 |
| MSTRG. 20775. 8  | 10311 | coding    | PF01031 |
| MSTRG. 20775. 9  | 3477  | coding    | PF00350 |
| MSTRG. 20776. 1  | 6726  | coding    | PF00517 |
| MSTRG. 20776. 2  | 6581  | coding    | PF00517 |
| MSTRG. 20777. 1  | 7166  | noncoding | –       |
| MSTRG. 20778. 1  | 3043  | noncoding | –       |
| MSTRG. 20780. 1  | 2250  | noncoding | –       |
| MSTRG. 20781. 1  | 2716  | noncoding | –       |
| MSTRG. 20782. 1  | 7794  | coding    | PF00078 |
| MSTRG. 20783. 1  | 3945  | noncoding | –       |
| MSTRG. 20781. 2  | 7510  | noncoding | –       |
| MSTRG. 20784. 1  | 9598  | coding    | PF03184 |
| MSTRG. 20785. 1  | 2678  | noncoding | –       |
| MSTRG. 20786. 1  | 3725  | noncoding | –       |
| MSTRG. 20775. 10 | 25752 | coding    | PF02212 |
| MSTRG. 20787. 1  | 7313  | noncoding | –       |
| MSTRG. 20787. 2  | 18030 | coding    | PF01359 |
| MSTRG. 20792. 1  | 12543 | noncoding | –       |
| MSTRG. 20793. 1  | 16596 | noncoding | –       |
| MSTRG. 20794. 1  | 4076  | noncoding | –       |
| MSTRG. 20800. 1  | 3445  | noncoding | –       |
| MSTRG. 20800. 2  | 774   | noncoding | –       |
| MSTRG. 20801. 1  | 921   | noncoding | –       |
| MSTRG. 20797. 1  | 632   | noncoding | –       |
| MSTRG. 20798. 4  | 2058  | coding    | PF00106 |
| MSTRG. 20819. 4  | 14172 | coding    | PF06650 |
| MSTRG. 20819. 8  | 11687 | coding    | PF06650 |
| MSTRG. 20822. 1  | 437   | noncoding | –       |
| MSTRG. 20816. 5  | 1894  | coding    | PF15734 |
| MSTRG. 20816. 3  | 2013  | coding    | PF15734 |
| MSTRG. 20816. 4  | 1792  | coding    | PF15734 |
| MSTRG. 20816. 2  | 1970  | coding    | PF15734 |
| MSTRG. 20823. 3  | 6703  | coding    | PF04799 |
| MSTRG. 20823. 4  | 4405  | coding    | PF04799 |
| MSTRG. 20823. 2  | 4795  | coding    | PF04799 |
| MSTRG. 20823. 1  | 7715  | coding    | PF04799 |
| MSTRG. 20817. 2  | 1987  | coding    | PF10222 |
| MSTRG. 20817. 1  | 2175  | coding    | PF10222 |
| MSTRG. 20828. 4  | 2645  | noncoding | –       |

|               |       |           |         |
|---------------|-------|-----------|---------|
| MSTRG.20828.5 | 2916  | noncoding | -       |
| MSTRG.20829.1 | 2804  | coding    | PF02219 |
| MSTRG.20829.2 | 2777  | coding    | PF02219 |
| MSTRG.20829.5 | 2586  | coding    | PF02219 |
| MSTRG.20830.4 | 4619  | coding    | PF15736 |
| MSTRG.20825.3 | 1082  | coding    | PF06396 |
| MSTRG.20825.4 | 1133  | coding    | PF06396 |
| MSTRG.20826.2 | 1744  | noncoding | -       |
| MSTRG.20831.1 | 964   | noncoding | -       |
| MSTRG.20832.3 | 1790  | coding    | PF04300 |
| MSTRG.20836.2 | 9878  | coding    | PF02259 |
| MSTRG.20836.3 | 8849  | coding    | PF02259 |
| MSTRG.20836.4 | 9462  | coding    | PF02259 |
| MSTRG.20840.1 | 4183  | coding    | PF04695 |
| MSTRG.20845.4 | 7832  | coding    | PF00225 |
| MSTRG.20845.7 | 12765 | coding    | PF00225 |
| MSTRG.20845.6 | 8100  | coding    | PF00225 |
| MSTRG.20845.9 | 4199  | noncoding | -       |
| MSTRG.20844.2 | 2112  | noncoding | -       |
| MSTRG.20850.1 | 18344 | coding    | PF06384 |
| MSTRG.20850.3 | 7520  | noncoding | -       |
| MSTRG.20852.4 | 4059  | noncoding | -       |
| MSTRG.20854.1 | 1013  | noncoding | -       |
| MSTRG.20854.2 | 1025  | noncoding | -       |
| MSTRG.20866.1 | 303   | noncoding | -       |
| MSTRG.20867.2 | 1893  | coding    | PF00083 |
| MSTRG.20873.1 | 2075  | coding    | PF00113 |
| MSTRG.20873.2 | 2033  | coding    | PF00113 |
| MSTRG.20873.3 | 1827  | coding    | PF00113 |
| MSTRG.20873.4 | 1869  | coding    | PF00113 |
| MSTRG.20875.3 | 5173  | noncoding | -       |
| MSTRG.20875.2 | 7772  | coding    | PF03154 |
| MSTRG.20876.1 | 6541  | noncoding | -       |
| MSTRG.20877.1 | 2282  | noncoding | -       |
| MSTRG.20878.1 | 15239 | noncoding | -       |
| MSTRG.20872.1 | 488   | noncoding | -       |
| MSTRG.20882.1 | 8400  | coding    | PF12114 |
| MSTRG.20883.1 | 1278  | noncoding | -       |
| MSTRG.20884.2 | 2745  | noncoding | -       |
| MSTRG.20884.3 | 3627  | noncoding | -       |
| MSTRG.20884.4 | 1958  | noncoding | -       |
| MSTRG.20891.1 | 21809 | noncoding | -       |
| MSTRG.20891.2 | 5664  | noncoding | -       |
| MSTRG.20891.3 | 4270  | noncoding | -       |
| MSTRG.20892.1 | 5183  | noncoding | -       |
| MSTRG.20895.1 | 4557  | noncoding | -       |
| MSTRG.20900.4 | 1410  | noncoding | -       |
| MSTRG.20900.3 | 5075  | coding    | PF00651 |
| MSTRG.20912.2 | 4130  | coding    | PF04140 |
| MSTRG.20913.3 | 10947 | coding    | PF08074 |
| MSTRG.20913.4 | 5915  | coding    | PF08074 |
| MSTRG.20913.5 | 9799  | coding    | PF08074 |
| MSTRG.20915.1 | 412   | noncoding | -       |
| MSTRG.20919.1 | 2411  | noncoding | -       |

|                |      |           |         |
|----------------|------|-----------|---------|
| MSTRG.20914.1  | 712  | noncoding | -       |
| MSTRG.20914.2  | 499  | noncoding | -       |
| MSTRG.20914.3  | 633  | noncoding | -       |
| MSTRG.20923.1  | 351  | noncoding | -       |
| MSTRG.20921.1  | 409  | noncoding | -       |
| MSTRG.20921.2  | 800  | noncoding | -       |
| MSTRG.20932.2  | 1437 | coding    | PF15772 |
| MSTRG.20934.1  | 773  | noncoding | -       |
| MSTRG.20930.1  | 1649 | noncoding | -       |
| MSTRG.20943.1  | 1478 | noncoding | -       |
| MSTRG.20944.1  | 1369 | noncoding | -       |
| MSTRG.20940.1  | 510  | noncoding | -       |
| MSTRG.20949.2  | 2362 | coding    | PF03630 |
| MSTRG.20951.1  | 2455 | noncoding | -       |
| MSTRG.20952.2  | 2037 | coding    | PF03248 |
| MSTRG.20953.4  | 6396 | noncoding | -       |
| MSTRG.20953.2  | 2185 | noncoding | -       |
| MSTRG.20953.5  | 5355 | noncoding | -       |
| MSTRG.20950.2  | 4405 | coding    | PF02437 |
| MSTRG.20955.3  | 1805 | coding    | PF00069 |
| MSTRG.20955.5  | 2296 | coding    | PF00069 |
| MSTRG.20955.4  | 2050 | coding    | PF00069 |
| MSTRG.20955.1  | 2302 | coding    | PF00069 |
| MSTRG.20957.1  | 2853 | noncoding | -       |
| MSTRG.20959.1  | 231  | noncoding | -       |
| MSTRG.20967.3  | 5627 | coding    | PF03151 |
| MSTRG.20967.7  | 5391 | coding    | PF03151 |
| MSTRG.20967.9  | 5234 | coding    | PF00069 |
| MSTRG.20967.10 | 4677 | coding    | PF00069 |
| MSTRG.20967.8  | 4443 | coding    | PF00069 |
| MSTRG.20967.11 | 4969 | coding    | PF00069 |
| MSTRG.20967.13 | 3371 | coding    | PF00069 |
| MSTRG.20967.14 | 2924 | coding    | PF00069 |
| MSTRG.20969.2  | 419  | noncoding | -       |
| MSTRG.20963.4  | 4066 | coding    | PF06701 |
| MSTRG.20963.5  | 4054 | coding    | PF06701 |
| MSTRG.20963.8  | 3856 | coding    | PF06701 |
| MSTRG.20963.6  | 3227 | coding    | PF06701 |
| MSTRG.20975.2  | 818  | noncoding | -       |
| MSTRG.20979.2  | 3008 | coding    | PF00778 |
| MSTRG.20981.2  | 2471 | coding    | PF16661 |
| MSTRG.20977.2  | 3508 | noncoding | -       |
| MSTRG.20978.1  | 1717 | noncoding | -       |
| MSTRG.20978.3  | 5329 | noncoding | -       |
| MSTRG.20986.2  | 4056 | coding    | PF03133 |
| MSTRG.20986.5  | 2229 | coding    | PF03133 |
| MSTRG.20986.1  | 4020 | coding    | PF03133 |
| MSTRG.20986.3  | 4064 | coding    | PF03133 |
| MSTRG.20986.7  | 3822 | coding    | PF03133 |
| MSTRG.20986.8  | 2690 | coding    | PF03133 |
| MSTRG.20989.1  | 1546 | noncoding | -       |
| MSTRG.20990.1  | 1101 | noncoding | -       |
| MSTRG.20990.2  | 1199 | noncoding | -       |
| MSTRG.20994.3  | 7406 | coding    | PF03146 |

|                 |       |           |         |
|-----------------|-------|-----------|---------|
| MSTRG. 20999. 2 | 12702 | coding    | PF07744 |
| MSTRG. 20999. 3 | 13652 | coding    | PF07744 |
| MSTRG. 21000. 1 | 1168  | noncoding | —       |
| MSTRG. 21002. 1 | 5102  | noncoding | —       |
| MSTRG. 21011. 4 | 2634  | coding    | PF00498 |
| MSTRG. 21017. 1 | 446   | noncoding | —       |
| MSTRG. 21018. 1 | 3721  | noncoding | —       |
| MSTRG. 21018. 2 | 3718  | noncoding | —       |
| MSTRG. 21018. 3 | 1144  | noncoding | —       |
| MSTRG. 21024. 5 | 9524  | noncoding | —       |
| MSTRG. 21024. 6 | 9762  | noncoding | —       |
| MSTRG. 21024. 7 | 10341 | noncoding | —       |
| MSTRG. 21022. 1 | 350   | noncoding | —       |
| MSTRG. 21027. 4 | 2335  | noncoding | —       |
| MSTRG. 21027. 6 | 2375  | noncoding | —       |
| MSTRG. 21027. 5 | 2088  | noncoding | —       |
| MSTRG. 21027. 8 | 1972  | noncoding | —       |
| MSTRG. 21037. 2 | 2010  | coding    | PF00578 |
| MSTRG. 21038. 2 | 6349  | noncoding | —       |
| MSTRG. 21038. 5 | 1040  | noncoding | —       |
| MSTRG. 21038. 6 | 6234  | noncoding | —       |
| MSTRG. 21039. 2 | 2754  | noncoding | —       |
| MSTRG. 21048. 3 | 11134 | noncoding | —       |
| MSTRG. 21048. 5 | 4203  | noncoding | —       |
| MSTRG. 21049. 2 | 10145 | noncoding | —       |
| MSTRG. 21061. 1 | 8598  | coding    | PF00566 |
| MSTRG. 21061. 2 | 11348 | coding    | PF00566 |
| MSTRG. 21062. 1 | 931   | noncoding | —       |
| MSTRG. 21061. 3 | 2179  | noncoding | —       |
| MSTRG. 21066. 1 | 1181  | coding    | PF09032 |
| MSTRG. 21068. 3 | 2915  | coding    | PF13923 |
| MSTRG. 21074. 1 | 5671  | noncoding | —       |
| MSTRG. 21076. 4 | 808   | coding    | PF15079 |
| MSTRG. 21079. 1 | 1244  | noncoding | —       |
| MSTRG. 21080. 3 | 7557  | coding    | PF00617 |
| MSTRG. 21080. 4 | 887   | noncoding | —       |
| MSTRG. 21082. 1 | 1104  | noncoding | —       |
| MSTRG. 21083. 1 | 3955  | noncoding | —       |
| MSTRG. 21086. 1 | 772   | noncoding | —       |
| MSTRG. 21087. 3 | 4825  | coding    | PF06702 |
| MSTRG. 21090. 1 | 2959  | coding    | PF00078 |
| MSTRG. 21089. 3 | 3415  | noncoding | —       |
| MSTRG. 21096. 4 | 2224  | coding    | PF03062 |
| MSTRG. 21092. 2 | 3581  | coding    | PF01145 |
| MSTRG. 21093. 3 | 3807  | coding    | PF00567 |
| MSTRG. 21104. 3 | 2923  | coding    | PF05609 |
| MSTRG. 21104. 4 | 2543  | coding    | PF05609 |
| MSTRG. 21105. 1 | 2803  | noncoding | —       |
| MSTRG. 21106. 5 | 4608  | coding    | PF05609 |
| MSTRG. 21106. 7 | 3624  | coding    | PF05609 |
| MSTRG. 21106. 6 | 3686  | coding    | PF05609 |
| MSTRG. 21106. 2 | 4827  | coding    | PF05609 |
| MSTRG. 21106. 4 | 4936  | coding    | PF05609 |
| MSTRG. 21106. 8 | 3405  | coding    | PF05609 |

|                  |      |           |         |
|------------------|------|-----------|---------|
| MSTRG. 21106. 9  | 3035 | coding    | PF05609 |
| MSTRG. 21106. 10 | 3501 | coding    | PF05609 |
| MSTRG. 21106. 11 | 3216 | coding    | PF05609 |
| MSTRG. 21101. 3  | 4866 | noncoding | —       |
| MSTRG. 21098. 1  | 9710 | noncoding | —       |
| MSTRG. 21102. 2  | 1101 | coding    | PF00887 |
| MSTRG. 21107. 2  | 7948 | coding    | PF03124 |
| MSTRG. 21107. 3  | 2574 | coding    | PF03124 |
| MSTRG. 21108. 1  | 7813 | noncoding | —       |
| MSTRG. 21109. 1  | 3910 | noncoding | —       |
| MSTRG. 21107. 4  | 1673 | coding    | PF03124 |
| MSTRG. 21111. 2  | 4669 | coding    | PF15737 |
| MSTRG. 21112. 1  | 7031 | coding    | PF09177 |
| MSTRG. 21112. 2  | 6343 | coding    | PF09177 |
| MSTRG. 21115. 1  | 2035 | coding    | PF05760 |
| MSTRG. 21117. 1  | 350  | noncoding | —       |
| MSTRG. 21120. 1  | 457  | noncoding | —       |
| MSTRG. 21126. 2  | 4508 | coding    | PF12796 |
| MSTRG. 21123. 1  | 769  | noncoding | —       |
| MSTRG. 21130. 3  | 4651 | noncoding | —       |
| MSTRG. 21127. 1  | 8099 | coding    | PF00055 |
| MSTRG. 21127. 2  | 8057 | coding    | PF00055 |
| MSTRG. 21128. 1  | 322  | noncoding | —       |
| MSTRG. 21146. 3  | 2031 | noncoding | —       |
| MSTRG. 21147. 1  | 688  | noncoding | —       |
| MSTRG. 21146. 4  | 1575 | noncoding | —       |
| MSTRG. 21146. 6  | 1545 | noncoding | —       |
| MSTRG. 21146. 5  | 8164 | noncoding | —       |
| MSTRG. 21146. 7  | 2172 | noncoding | —       |
| MSTRG. 21146. 8  | 956  | noncoding | —       |
| MSTRG. 21146. 9  | 4099 | noncoding | —       |
| MSTRG. 21146. 10 | 7677 | noncoding | —       |
| MSTRG. 21146. 11 | 9405 | noncoding | —       |
| MSTRG. 21146. 12 | 1461 | noncoding | —       |
| MSTRG. 21148. 10 | 3725 | coding    | PF10373 |
| MSTRG. 21148. 12 | 3778 | coding    | PF10373 |
| MSTRG. 21148. 6  | 3864 | coding    | PF10373 |
| MSTRG. 21148. 8  | 3844 | coding    | PF10373 |
| MSTRG. 21148. 9  | 4014 | coding    | PF10373 |
| MSTRG. 21134. 1  | 1525 | coding    | PF01755 |
| MSTRG. 21151. 1  | 3100 | noncoding | —       |
| MSTRG. 21152. 1  | 5069 | coding    | PF01532 |
| MSTRG. 21153. 1  | 6740 | noncoding | —       |
| MSTRG. 21154. 1  | 3892 | noncoding | —       |
| MSTRG. 21154. 2  | 761  | noncoding | —       |
| MSTRG. 21155. 1  | 786  | noncoding | —       |
| MSTRG. 21156. 2  | 2069 | coding    | PF16207 |
| MSTRG. 21154. 3  | 1305 | noncoding | —       |
| MSTRG. 21154. 4  | 7780 | coding    | PF00078 |
| MSTRG. 21159. 3  | 3241 | coding    | PF02005 |
| MSTRG. 21159. 4  | 3450 | coding    | PF02005 |
| MSTRG. 21159. 5  | 4963 | coding    | PF02005 |
| MSTRG. 21159. 6  | 2673 | coding    | PF02005 |
| MSTRG. 21159. 7  | 2474 | noncoding | —       |

|                 |       |           |         |
|-----------------|-------|-----------|---------|
| MSTRG. 21162. 6 | 3027  | coding    | PF01344 |
| MSTRG. 21162. 7 | 3471  | coding    | PF01344 |
| MSTRG. 21163. 1 | 778   | noncoding | –       |
| MSTRG. 21163. 2 | 1878  | noncoding | –       |
| MSTRG. 21173. 1 | 17106 | coding    | PF07474 |
| MSTRG. 21169. 1 | 1219  | noncoding | –       |
| MSTRG. 21176. 1 | 451   | noncoding | –       |
| MSTRG. 21176. 2 | 410   | noncoding | –       |
| MSTRG. 21179. 3 | 10168 | coding    | PF10481 |
| MSTRG. 21179. 2 | 10181 | coding    | PF10481 |
| MSTRG. 21179. 5 | 10444 | coding    | PF10481 |
| MSTRG. 21179. 6 | 10130 | coding    | PF10481 |
| MSTRG. 21181. 2 | 11119 | coding    | PF00102 |
| MSTRG. 21198. 1 | 1935  | coding    | PF14822 |
| MSTRG. 21198. 2 | 3647  | coding    | PF14822 |
| MSTRG. 21198. 3 | 3571  | coding    | PF14822 |
| MSTRG. 21212. 1 | 4467  | noncoding | –       |
| MSTRG. 21212. 2 | 3428  | noncoding | –       |
| MSTRG. 21213. 2 | 3003  | noncoding | –       |
| MSTRG. 21216. 2 | 4481  | noncoding | –       |
| MSTRG. 21218. 2 | 1101  | noncoding | –       |
| MSTRG. 21218. 3 | 873   | noncoding | –       |
| MSTRG. 21220. 3 | 1917  | noncoding | –       |
| MSTRG. 21220. 4 | 3431  | noncoding | –       |
| MSTRG. 21224. 1 | 748   | noncoding | –       |
| MSTRG. 21235. 3 | 2921  | coding    | PF06862 |
| MSTRG. 21234. 1 | 311   | noncoding | –       |
| MSTRG. 21244. 1 | 674   | noncoding | –       |
| MSTRG. 21248. 2 | 900   | noncoding | –       |
| MSTRG. 21249. 1 | 4384  | noncoding | –       |
| MSTRG. 21250. 2 | 2594  | coding    | PF06365 |
| MSTRG. 21251. 1 | 813   | coding    | PF06365 |
| MSTRG. 21251. 2 | 1121  | coding    | PF06365 |
| MSTRG. 21252. 1 | 2756  | noncoding | –       |
| MSTRG. 21252. 2 | 3717  | noncoding | –       |
| MSTRG. 21254. 1 | 1821  | noncoding | –       |
| MSTRG. 21256. 5 | 3651  | coding    | PF00084 |
| MSTRG. 21256. 6 | 1274  | coding    | PF00084 |
| MSTRG. 21257. 1 | 603   | noncoding | –       |
| MSTRG. 21260. 1 | 2338  | coding    | PF00084 |
| MSTRG. 21262. 1 | 928   | coding    | PF00084 |
| MSTRG. 21268. 1 | 1621  | noncoding | –       |
| MSTRG. 21269. 1 | 5929  | coding    | PF02210 |
| MSTRG. 21269. 2 | 1443  | noncoding | –       |
| MSTRG. 21271. 2 | 5184  | coding    | PF02141 |
| MSTRG. 21272. 1 | 852   | noncoding | –       |
| MSTRG. 21278. 2 | 3650  | coding    | PF00069 |
| MSTRG. 21301. 3 | 4695  | noncoding | –       |
| MSTRG. 21302. 1 | 6382  | noncoding | –       |
| MSTRG. 21308. 1 | 4842  | noncoding | –       |
| MSTRG. 21309. 2 | 4856  | coding    | PF00225 |
| MSTRG. 21310. 3 | 2598  | coding    | PF00270 |
| MSTRG. 21315. 2 | 7013  | coding    | PF08683 |
| MSTRG. 21316. 1 | 2625  | noncoding | –       |

|                 |       |           |         |
|-----------------|-------|-----------|---------|
| MSTRG. 21317.1  | 627   | noncoding | -       |
| MSTRG. 21318.1  | 1564  | noncoding | -       |
| MSTRG. 21315.4  | 1746  | noncoding | -       |
| MSTRG. 21314.1  | 1506  | coding    | PF11819 |
| MSTRG. 21319.1  | 3238  | noncoding | -       |
| MSTRG. 21323.1  | 8362  | coding    | PF00225 |
| MSTRG. 21323.5  | 7386  | coding    | PF00225 |
| MSTRG. 21323.3  | 7616  | coding    | PF00225 |
| MSTRG. 21323.8  | 5789  | coding    | PF00225 |
| MSTRG. 21323.7  | 5727  | coding    | PF00225 |
| MSTRG. 21323.9  | 5979  | coding    | PF00225 |
| MSTRG. 21321.1  | 5069  | coding    | PF08763 |
| MSTRG. 21321.2  | 4784  | coding    | PF08763 |
| MSTRG. 21321.3  | 4234  | coding    | PF08763 |
| MSTRG. 21324.2  | 4329  | noncoding | -       |
| MSTRG. 21324.3  | 2866  | noncoding | -       |
| MSTRG. 21326.1  | 3755  | noncoding | -       |
| MSTRG. 21327.3  | 2647  | coding    | PF03006 |
| MSTRG. 21327.6  | 2864  | coding    | PF03006 |
| MSTRG. 21327.8  | 2066  | coding    | PF03006 |
| MSTRG. 21330.2  | 619   | coding    | PF00651 |
| MSTRG. 21333.4  | 2019  | coding    | PF04666 |
| MSTRG. 21334.5  | 6392  | coding    | PF08429 |
| MSTRG. 21334.6  | 6599  | coding    | PF08429 |
| MSTRG. 21334.7  | 6460  | coding    | PF08429 |
| MSTRG. 21334.8  | 6477  | coding    | PF08429 |
| MSTRG. 21334.9  | 6621  | coding    | PF08429 |
| MSTRG. 21334.10 | 8186  | coding    | PF08429 |
| MSTRG. 21335.1  | 8337  | noncoding | -       |
| MSTRG. 21336.1  | 4465  | noncoding | -       |
| MSTRG. 21336.2  | 4287  | noncoding | -       |
| MSTRG. 21336.3  | 3898  | noncoding | -       |
| MSTRG. 21338.4  | 18924 | coding    | PF15898 |
| MSTRG. 21338.6  | 5771  | coding    | PF15898 |
| MSTRG. 21338.7  | 6460  | coding    | PF15898 |
| MSTRG. 21338.9  | 1446  | noncoding | -       |
| MSTRG. 21338.10 | 2120  | noncoding | -       |
| MSTRG. 21338.13 | 5147  | coding    | PF12796 |
| MSTRG. 21338.12 | 2067  | coding    | PF12796 |
| MSTRG. 21342.1  | 2531  | noncoding | -       |
| MSTRG. 21343.3  | 1203  | coding    | PF00179 |
| MSTRG. 21348.4  | 5507  | coding    | PF00102 |
| MSTRG. 21348.1  | 7606  | coding    | PF00102 |
| MSTRG. 21348.2  | 7609  | coding    | PF00102 |
| MSTRG. 21349.1  | 2740  | coding    | PF00102 |
| MSTRG. 21351.1  | 436   | noncoding | -       |
| MSTRG. 21345.1  | 3293  | coding    | PF02466 |
| MSTRG. 21371.3  | 3817  | noncoding | -       |
| MSTRG. 21371.5  | 4187  | noncoding | -       |
| MSTRG. 21371.4  | 10724 | noncoding | -       |
| MSTRG. 21371.6  | 9004  | coding    | PF00078 |
| MSTRG. 21371.7  | 4031  | noncoding | -       |
| MSTRG. 21371.9  | 10632 | noncoding | -       |
| MSTRG. 21371.10 | 12793 | noncoding | -       |

|                  |       |           |         |
|------------------|-------|-----------|---------|
| MSTRG. 21371. 11 | 12995 | noncoding | -       |
| MSTRG. 21371. 13 | 11745 | noncoding | -       |
| MSTRG. 21371. 12 | 12997 | noncoding | -       |
| MSTRG. 21371. 15 | 10983 | noncoding | -       |
| MSTRG. 21371. 16 | 11651 | noncoding | -       |
| MSTRG. 21371. 17 | 10706 | noncoding | -       |
| MSTRG. 21371. 18 | 9680  | noncoding | -       |
| MSTRG. 21372. 1  | 9582  | noncoding | -       |
| MSTRG. 21373. 1  | 863   | noncoding | -       |
| MSTRG. 21372. 2  | 5892  | noncoding | -       |
| MSTRG. 21356. 1  | 1251  | noncoding | -       |
| MSTRG. 21359. 1  | 2841  | noncoding | -       |
| MSTRG. 21361. 1  | 3362  | coding    | PF02460 |
| MSTRG. 21362. 1  | 1752  | noncoding | -       |
| MSTRG. 21363. 1  | 1968  | coding    | PF14802 |
| MSTRG. 21368. 2  | 3197  | coding    | PF00651 |
| MSTRG. 21368. 3  | 3783  | coding    | PF07707 |
| MSTRG. 21369. 1  | 1755  | noncoding | -       |
| MSTRG. 21377. 1  | 238   | noncoding | -       |
| MSTRG. 21375. 1  | 420   | noncoding | -       |
| MSTRG. 21384. 1  | 1669  | noncoding | -       |
| MSTRG. 21385. 5  | 4682  | noncoding | -       |
| MSTRG. 21385. 4  | 2042  | coding    | PF14709 |
| MSTRG. 21385. 7  | 9977  | noncoding | -       |
| MSTRG. 21385. 8  | 1648  | noncoding | -       |
| MSTRG. 21385. 9  | 4380  | coding    | PF14709 |
| MSTRG. 21385. 10 | 847   | noncoding | -       |
| MSTRG. 21395. 3  | 983   | coding    | PF03962 |
| MSTRG. 21396. 3  | 5041  | coding    | PF00630 |
| MSTRG. 21396. 4  | 3721  | coding    | PF00630 |
| MSTRG. 21406. 1  | 5012  | noncoding | -       |
| MSTRG. 21406. 2  | 2428  | noncoding | -       |
| MSTRG. 21400. 1  | 817   | noncoding | -       |
| MSTRG. 21402. 1  | 780   | noncoding | -       |
| MSTRG. 21403. 1  | 989   | noncoding | -       |
| MSTRG. 21414. 1  | 966   | noncoding | -       |
| MSTRG. 21415. 1  | 10457 | noncoding | -       |
| MSTRG. 21416. 1  | 3776  | noncoding | -       |
| MSTRG. 21433. 1  | 7479  | coding    | PF00018 |
| MSTRG. 21433. 4  | 5227  | coding    | PF00018 |
| MSTRG. 21433. 3  | 7569  | coding    | PF00018 |
| MSTRG. 21433. 5  | 12169 | coding    | PF00018 |
| MSTRG. 21433. 6  | 24139 | coding    | PF01015 |
| MSTRG. 21433. 7  | 5719  | coding    | PF00018 |
| MSTRG. 21433. 8  | 7582  | coding    | PF00018 |
| MSTRG. 21433. 9  | 17628 | noncoding | -       |
| MSTRG. 21434. 1  | 917   | coding    | PF00089 |
| MSTRG. 21433. 10 | 9120  | coding    | PF00018 |
| MSTRG. 21433. 11 | 25980 | coding    | PF00078 |
| MSTRG. 21433. 13 | 5087  | coding    | PF00018 |
| MSTRG. 21433. 14 | 5883  | coding    | PF00018 |
| MSTRG. 21433. 15 | 5695  | coding    | PF00018 |
| MSTRG. 21433. 16 | 5340  | coding    | PF00018 |
| MSTRG. 21433. 18 | 5060  | coding    | PF00018 |



|                  |       |           |         |
|------------------|-------|-----------|---------|
| MSTRG. 21433. 19 | 3691  | noncoding | —       |
| MSTRG. 21433. 20 | 7095  | coding    | PF00018 |
| MSTRG. 21433. 22 | 2199  | noncoding | —       |
| MSTRG. 21441. 2  | 715   | coding    | PF01015 |
| MSTRG. 21419. 1  | 10069 | coding    | PF02138 |
| MSTRG. 21425. 1  | 292   | noncoding | —       |
| MSTRG. 21427. 2  | 1400  | noncoding | —       |
| MSTRG. 21427. 1  | 2889  | noncoding | —       |
| MSTRG. 21428. 1  | 330   | noncoding | —       |
| MSTRG. 21429. 1  | 797   | noncoding | —       |
| MSTRG. 21432. 1  | 486   | noncoding | —       |
| MSTRG. 21449. 1  | 8328  | coding    | PF16746 |
| MSTRG. 21449. 4  | 2896  | coding    | PF00620 |
| MSTRG. 21450. 1  | 10910 | noncoding | —       |
| MSTRG. 21450. 2  | 2412  | noncoding | —       |
| MSTRG. 21451. 1  | 1616  | noncoding | —       |
| MSTRG. 21449. 5  | 12673 | noncoding | —       |
| MSTRG. 21452. 1  | 15114 | noncoding | —       |
| MSTRG. 21453. 1  | 26598 | noncoding | —       |
| MSTRG. 21454. 1  | 11154 | noncoding | —       |
| MSTRG. 21454. 2  | 2837  | noncoding | —       |
| MSTRG. 21446. 2  | 2728  | noncoding | —       |
| MSTRG. 21447. 4  | 1946  | coding    | PF03619 |
| MSTRG. 21447. 2  | 2112  | coding    | PF03619 |
| MSTRG. 21471. 1  | 7813  | noncoding | —       |
| MSTRG. 21471. 3  | 7437  | noncoding | —       |
| MSTRG. 21472. 1  | 388   | noncoding | —       |
| MSTRG. 21470. 3  | 903   | coding    | PF15849 |
| MSTRG. 21474. 3  | 1419  | coding    | PF03308 |
| MSTRG. 21484. 4  | 7211  | noncoding | —       |
| MSTRG. 21486. 2  | 1229  | coding    | PF03256 |
| MSTRG. 21502. 2  | 6716  | noncoding | —       |
| MSTRG. 21502. 7  | 4853  | noncoding | —       |
| MSTRG. 21502. 4  | 6099  | noncoding | —       |
| MSTRG. 21502. 6  | 5009  | noncoding | —       |
| MSTRG. 21502. 5  | 6137  | noncoding | —       |
| MSTRG. 21503. 1  | 905   | noncoding | —       |
| MSTRG. 21511. 1  | 2897  | noncoding | —       |
| MSTRG. 21520. 1  | 2502  | noncoding | —       |
| MSTRG. 21526. 1  | 1250  | noncoding | —       |
| MSTRG. 21533. 1  | 377   | noncoding | —       |
| MSTRG. 21534. 1  | 322   | noncoding | —       |
| MSTRG. 21532. 2  | 3190  | noncoding | —       |
| MSTRG. 21535. 1  | 10088 | noncoding | —       |
| MSTRG. 21532. 3  | 8554  | noncoding | —       |
| MSTRG. 21536. 1  | 395   | noncoding | —       |
| MSTRG. 21537. 1  | 2409  | noncoding | —       |
| MSTRG. 21532. 4  | 6791  | noncoding | —       |
| MSTRG. 21538. 1  | 5785  | noncoding | —       |
| MSTRG. 21499. 2  | 1069  | coding    | PF13639 |
| MSTRG. 21499. 3  | 949   | coding    | PF13639 |
| MSTRG. 21552. 1  | 6070  | noncoding | —       |
| MSTRG. 21553. 1  | 8609  | noncoding | —       |
| MSTRG. 21555. 1  | 4778  | noncoding | —       |

|                 |       |           |         |
|-----------------|-------|-----------|---------|
| MSTRG. 21556.1  | 6135  | noncoding | -       |
| MSTRG. 21569.1  | 857   | coding    | PF15088 |
| MSTRG. 21572.1  | 939   | noncoding | -       |
| MSTRG. 21572.2  | 1617  | noncoding | -       |
| MSTRG. 21573.5  | 10219 | coding    | PF00178 |
| MSTRG. 21573.6  | 3263  | coding    | PF00178 |
| MSTRG. 21573.7  | 4249  | coding    | PF00178 |
| MSTRG. 21573.9  | 3814  | coding    | PF00178 |
| MSTRG. 21573.14 | 3576  | coding    | PF00178 |
| MSTRG. 21575.1  | 1996  | noncoding | -       |
| MSTRG. 21580.1  | 5537  | noncoding | -       |
| MSTRG. 21580.2  | 3122  | noncoding | -       |
| MSTRG. 21580.3  | 1571  | noncoding | -       |
| MSTRG. 21598.1  | 292   | noncoding | -       |
| MSTRG. 21612.1  | 215   | noncoding | -       |
| MSTRG. 21649.1  | 1114  | noncoding | -       |
| MSTRG. 21656.9  | 13151 | coding    | PF13832 |
| MSTRG. 21657.1  | 385   | noncoding | -       |
| MSTRG. 21670.1  | 1541  | noncoding | -       |
| MSTRG. 21670.2  | 412   | noncoding | -       |
| MSTRG. 21695.4  | 3326  | coding    | PF05383 |
| MSTRG. 21696.1  | 11003 | coding    | PF02994 |
| MSTRG. 21695.6  | 2855  | coding    | PF05383 |
| MSTRG. 21697.1  | 1758  | noncoding | -       |
| MSTRG. 21695.7  | 2866  | coding    | PF05383 |
| MSTRG. 21698.1  | 2484  | noncoding | -       |
| MSTRG. 21695.10 | 2078  | coding    | PF05383 |
| MSTRG. 21708.1  | 209   | noncoding | -       |
| MSTRG. 21674.1  | 889   | noncoding | -       |
| MSTRG. 21676.1  | 1066  | noncoding | -       |
| MSTRG. 21680.1  | 946   | noncoding | -       |
| MSTRG. 21729.1  | 717   | noncoding | -       |
| MSTRG. 21725.1  | 1100  | noncoding | -       |
| MSTRG. 21739.1  | 1603  | noncoding | -       |
| MSTRG. 21741.2  | 907   | noncoding | -       |
| MSTRG. 21741.1  | 1276  | noncoding | -       |
| MSTRG. 21749.1  | 4442  | coding    | PF00004 |
| MSTRG. 21749.4  | 2710  | coding    | PF00004 |
| MSTRG. 21749.5  | 14224 | noncoding | -       |
| MSTRG. 21749.6  | 11715 | noncoding | -       |
| MSTRG. 21749.7  | 358   | noncoding | -       |
| MSTRG. 21751.1  | 1860  | noncoding | -       |
| MSTRG. 21752.1  | 955   | noncoding | -       |
| MSTRG. 21749.8  | 2194  | noncoding | -       |
| MSTRG. 21753.1  | 5860  | noncoding | -       |
| MSTRG. 21754.1  | 2362  | noncoding | -       |
| MSTRG. 21754.2  | 4388  | noncoding | -       |
| MSTRG. 21749.9  | 2924  | coding    | PF00004 |
| MSTRG. 21755.1  | 609   | noncoding | -       |
| MSTRG. 21755.2  | 909   | coding    | PF00004 |
| MSTRG. 21760.1  | 3232  | coding    | PF00167 |
| MSTRG. 21771.6  | 15724 | coding    | PF02137 |
| MSTRG. 21772.1  | 10782 | noncoding | -       |
| MSTRG. 21771.19 | 2786  | coding    | PF02137 |

|                 |       |           |         |
|-----------------|-------|-----------|---------|
| MSTRG. 21771.20 | 4952  | coding    | PF02137 |
| MSTRG. 21771.21 | 2525  | coding    | PF02137 |
| MSTRG. 21771.22 | 3056  | coding    | PF02137 |
| MSTRG. 21771.23 | 1921  | coding    | PF02137 |
| MSTRG. 21773.1  | 2336  | noncoding | —       |
| MSTRG. 21775.1  | 1223  | coding    | PF10479 |
| MSTRG. 21771.24 | 15507 | coding    | PF10479 |
| MSTRG. 21771.25 | 15832 | coding    | PF10479 |
| MSTRG. 21771.26 | 15630 | coding    | PF10479 |
| MSTRG. 21771.27 | 15167 | coding    | PF10479 |
| MSTRG. 21771.28 | 5052  | noncoding | —       |
| MSTRG. 21771.29 | 3389  | noncoding | —       |
| MSTRG. 21763.1  | 391   | noncoding | —       |
| MSTRG. 21779.2  | 6932  | coding    | PF00617 |
| MSTRG. 21779.1  | 6981  | coding    | PF00617 |
| MSTRG. 21790.1  | 3571  | coding    | PF05187 |
| MSTRG. 21791.2  | 1709  | noncoding | —       |
| MSTRG. 21795.1  | 1560  | coding    | PF07857 |
| MSTRG. 21795.3  | 4460  | coding    | PF07857 |
| MSTRG. 21795.4  | 1303  | coding    | PF07857 |
| MSTRG. 21795.5  | 1808  | coding    | PF07857 |
| MSTRG. 21795.6  | 1697  | coding    | PF07857 |
| MSTRG. 21796.1  | 1019  | noncoding | —       |
| MSTRG. 21797.1  | 4461  | coding    | PF15051 |
| MSTRG. 21797.2  | 4862  | coding    | PF15051 |
| MSTRG. 21794.1  | 209   | noncoding | —       |
| MSTRG. 21806.2  | 1158  | coding    | PF00211 |
| MSTRG. 21812.2  | 4081  | coding    | PF01352 |
| MSTRG. 21812.1  | 1507  | coding    | PF01352 |
| MSTRG. 21812.4  | 6295  | coding    | PF01352 |
| MSTRG. 21808.2  | 3180  | coding    | PF01352 |
| MSTRG. 21815.1  | 826   | noncoding | —       |
| MSTRG. 21817.2  | 610   | noncoding | —       |
| MSTRG. 21818.3  | 1034  | coding    | PF16564 |
| MSTRG. 21819.1  | 2064  | noncoding | —       |
| MSTRG. 21820.1  | 11129 | noncoding | —       |
| MSTRG. 21820.2  | 2074  | noncoding | —       |
| MSTRG. 21827.2  | 1738  | noncoding | —       |
| MSTRG. 21827.3  | 2027  | coding    | PF04117 |
| MSTRG. 21829.2  | 8261  | coding    | PF08490 |
| MSTRG. 21829.3  | 8625  | coding    | PF08490 |
| MSTRG. 21831.1  | 4588  | coding    | PF15336 |
| MSTRG. 21831.10 | 4516  | coding    | PF15336 |
| MSTRG. 21831.11 | 4618  | coding    | PF15336 |
| MSTRG. 21831.3  | 4690  | coding    | PF15336 |
| MSTRG. 21831.5  | 4621  | coding    | PF15336 |
| MSTRG. 21831.7  | 4552  | coding    | PF15336 |
| MSTRG. 21831.9  | 3079  | coding    | PF15336 |
| MSTRG. 21831.12 | 17445 | noncoding | —       |
| MSTRG. 21831.13 | 13964 | noncoding | —       |
| MSTRG. 21831.14 | 5269  | noncoding | —       |
| MSTRG. 21830.1  | 773   | noncoding | —       |
| MSTRG. 21834.3  | 2757  | coding    | PF03914 |
| MSTRG. 21834.2  | 2754  | coding    | PF03914 |

|                  |       |           |         |
|------------------|-------|-----------|---------|
| MSTRG. 21837. 5  | 11865 | coding    | PF15790 |
| MSTRG. 21837. 6  | 11622 | coding    | PF15790 |
| MSTRG. 21837. 8  | 11868 | coding    | PF15790 |
| MSTRG. 21837. 9  | 11701 | coding    | PF15790 |
| MSTRG. 21842. 2  | 3303  | coding    | PF09750 |
| MSTRG. 21842. 6  | 4546  | coding    | PF01359 |
| MSTRG. 21841. 1  | 578   | noncoding | -       |
| MSTRG. 21846. 1  | 4511  | coding    | PF00002 |
| MSTRG. 21846. 2  | 3091  | noncoding | -       |
| MSTRG. 21846. 3  | 1775  | noncoding | -       |
| MSTRG. 21856. 2  | 1977  | coding    | PF00071 |
| MSTRG. 21863. 1  | 2314  | noncoding | -       |
| MSTRG. 21864. 2  | 6719  | coding    | PF02171 |
| MSTRG. 21865. 1  | 6173  | noncoding | -       |
| MSTRG. 21850. 3  | 2630  | noncoding | -       |
| MSTRG. 21850. 2  | 2851  | noncoding | -       |
| MSTRG. 21867. 1  | 1978  | coding    | PF16070 |
| MSTRG. 21870. 1  | 419   | noncoding | -       |
| MSTRG. 21874. 1  | 2866  | noncoding | -       |
| MSTRG. 21876. 1  | 642   | noncoding | -       |
| MSTRG. 21880. 1  | 8412  | coding    | PF16070 |
| MSTRG. 21880. 2  | 8587  | coding    | PF16070 |
| MSTRG. 21880. 3  | 6757  | coding    | PF16070 |
| MSTRG. 21880. 4  | 8243  | noncoding | -       |
| MSTRG. 21880. 5  | 42836 | noncoding | -       |
| MSTRG. 21880. 6  | 38687 | noncoding | -       |
| MSTRG. 21881. 1  | 258   | noncoding | -       |
| MSTRG. 21880. 7  | 17189 | noncoding | -       |
| MSTRG. 21880. 8  | 32669 | noncoding | -       |
| MSTRG. 21880. 9  | 22949 | noncoding | -       |
| MSTRG. 21885. 4  | 1056  | coding    | PF14965 |
| MSTRG. 21885. 3  | 1437  | coding    | PF14965 |
| MSTRG. 21886. 1  | 2767  | noncoding | -       |
| MSTRG. 21887. 1  | 5437  | coding    | PF07717 |
| MSTRG. 21889. 1  | 1427  | noncoding | -       |
| MSTRG. 21890. 2  | 4894  | coding    | PF00240 |
| MSTRG. 21890. 3  | 1563  | coding    | PF00240 |
| MSTRG. 21890. 4  | 3842  | coding    | PF00240 |
| MSTRG. 21890. 5  | 2475  | coding    | PF00240 |
| MSTRG. 21890. 6  | 4214  | coding    | PF00240 |
| MSTRG. 21890. 7  | 2931  | coding    | PF00240 |
| MSTRG. 21890. 8  | 2912  | coding    | PF00240 |
| MSTRG. 21890. 12 | 880   | coding    | PF00240 |
| MSTRG. 21890. 20 | 1336  | coding    | PF00240 |
| MSTRG. 21890. 15 | 954   | coding    | PF00240 |
| MSTRG. 21890. 19 | 2810  | coding    | PF00240 |
| MSTRG. 21890. 10 | 999   | coding    | PF00240 |
| MSTRG. 21890. 21 | 2319  | coding    | PF00240 |
| MSTRG. 21890. 22 | 984   | coding    | PF00240 |
| MSTRG. 21882. 1  | 680   | noncoding | -       |
| MSTRG. 21883. 1  | 1122  | noncoding | -       |
| MSTRG. 21897. 10 | 9004  | noncoding | -       |
| MSTRG. 21897. 11 | 8838  | noncoding | -       |
| MSTRG. 21897. 12 | 8844  | noncoding | -       |

|                  |       |           |         |
|------------------|-------|-----------|---------|
| MSTRG. 21897. 13 | 8993  | noncoding | —       |
| MSTRG. 21897. 15 | 8888  | noncoding | —       |
| MSTRG. 21897. 16 | 8838  | noncoding | —       |
| MSTRG. 21897. 17 | 9003  | noncoding | —       |
| MSTRG. 21897. 18 | 8936  | noncoding | —       |
| MSTRG. 21897. 3  | 8844  | noncoding | —       |
| MSTRG. 21897. 4  | 8841  | noncoding | —       |
| MSTRG. 21897. 5  | 8703  | noncoding | —       |
| MSTRG. 21897. 6  | 8892  | noncoding | —       |
| MSTRG. 21897. 7  | 8885  | noncoding | —       |
| MSTRG. 21897. 8  | 8892  | noncoding | —       |
| MSTRG. 21897. 9  | 8895  | noncoding | —       |
| MSTRG. 21898. 2  | 1703  | noncoding | —       |
| MSTRG. 21898. 1  | 1628  | noncoding | —       |
| MSTRG. 21899. 1  | 868   | noncoding | —       |
| MSTRG. 21897. 19 | 9187  | noncoding | —       |
| MSTRG. 21897. 20 | 8292  | noncoding | —       |
| MSTRG. 21897. 21 | 18860 | noncoding | —       |
| MSTRG. 21897. 22 | 7367  | noncoding | —       |
| MSTRG. 21897. 23 | 6942  | noncoding | —       |
| MSTRG. 21897. 24 | 6766  | noncoding | —       |
| MSTRG. 21897. 25 | 6867  | noncoding | —       |
| MSTRG. 21897. 26 | 5951  | noncoding | —       |
| MSTRG. 21902. 1  | 1226  | noncoding | —       |
| MSTRG. 21903. 2  | 4305  | noncoding | —       |
| MSTRG. 21903. 5  | 1211  | noncoding | —       |
| MSTRG. 21903. 3  | 876   | noncoding | —       |
| MSTRG. 21903. 4  | 3568  | noncoding | —       |
| MSTRG. 21903. 7  | 793   | noncoding | —       |
| MSTRG. 21905. 2  | 5067  | noncoding | —       |
| MSTRG. 21905. 3  | 11573 | noncoding | —       |
| MSTRG. 21905. 6  | 20743 | noncoding | —       |
| MSTRG. 21907. 2  | 4936  | coding    | PF01496 |
| MSTRG. 21907. 3  | 5461  | coding    | PF01496 |
| MSTRG. 21912. 1  | 2934  | noncoding | —       |
| MSTRG. 21912. 2  | 1658  | noncoding | —       |
| MSTRG. 21900. 5  | 1198  | coding    | PF00856 |
| MSTRG. 21916. 3  | 5032  | coding    | PF13872 |
| MSTRG. 21917. 1  | 1741  | noncoding | —       |
| MSTRG. 21918. 2  | 1221  | coding    | PF09806 |
| MSTRG. 21919. 4  | 974   | coding    | PF00472 |
| MSTRG. 21919. 5  | 564   | noncoding | —       |
| MSTRG. 21920. 7  | 4507  | noncoding | —       |
| MSTRG. 21925. 1  | 6705  | coding    | PF02121 |
| MSTRG. 21926. 1  | 485   | noncoding | —       |
| MSTRG. 21925. 2  | 4075  | coding    | PF02121 |
| MSTRG. 21925. 3  | 8333  | coding    | PF02121 |
| MSTRG. 21927. 1  | 406   | noncoding | —       |
| MSTRG. 21927. 2  | 685   | noncoding | —       |
| MSTRG. 21925. 4  | 6940  | coding    | PF02121 |
| MSTRG. 21925. 5  | 7570  | coding    | PF02121 |
| MSTRG. 21928. 2  | 1368  | coding    | PF10500 |
| MSTRG. 21921. 2  | 2554  | noncoding | —       |
| MSTRG. 21932. 2  | 2628  | noncoding | —       |

|                  |      |           |         |
|------------------|------|-----------|---------|
| MSTRG. 21932. 3  | 2445 | noncoding | -       |
| MSTRG. 21934. 2  | 928  | noncoding | -       |
| MSTRG. 21935. 2  | 430  | coding    | PF00240 |
| MSTRG. 21941. 1  | 7981 | coding    | PF10493 |
| MSTRG. 21941. 2  | 8253 | coding    | PF10493 |
| MSTRG. 21942. 1  | 2280 | noncoding | -       |
| MSTRG. 21942. 5  | 2292 | noncoding | -       |
| MSTRG. 21939. 2  | 5881 | coding    | PF01302 |
| MSTRG. 21940. 1  | 1287 | noncoding | -       |
| MSTRG. 21939. 3  | 8173 | coding    | PF01302 |
| MSTRG. 21939. 4  | 8106 | coding    | PF01302 |
| MSTRG. 21943. 1  | 2105 | noncoding | -       |
| MSTRG. 21943. 2  | 2099 | noncoding | -       |
| MSTRG. 21949. 1  | 3714 | coding    | PF04714 |
| MSTRG. 21953. 1  | 306  | noncoding | -       |
| MSTRG. 21955. 1  | 910  | noncoding | -       |
| MSTRG. 21958. 4  | 683  | noncoding | -       |
| MSTRG. 21958. 5  | 1010 | noncoding | -       |
| MSTRG. 21958. 10 | 1227 | noncoding | -       |
| MSTRG. 21958. 3  | 739  | noncoding | -       |
| MSTRG. 21958. 6  | 897  | noncoding | -       |
| MSTRG. 21958. 7  | 1124 | noncoding | -       |
| MSTRG. 21958. 8  | 966  | noncoding | -       |
| MSTRG. 21958. 9  | 1043 | noncoding | -       |
| MSTRG. 21959. 1  | 767  | coding    | PF01242 |
| MSTRG. 21961. 2  | 3613 | coding    | PF16866 |
| MSTRG. 21961. 3  | 3622 | coding    | PF16866 |
| MSTRG. 21961. 4  | 2790 | noncoding | -       |
| MSTRG. 21961. 5  | 2916 | noncoding | -       |
| MSTRG. 21963. 3  | 1606 | coding    | PF12862 |
| MSTRG. 21977. 2  | 1882 | coding    | PF00864 |
| MSTRG. 21978. 2  | 2460 | noncoding | -       |
| MSTRG. 21980. 1  | 1715 | noncoding | -       |
| MSTRG. 21985. 2  | 5931 | coding    | PF00122 |
| MSTRG. 21985. 4  | 5483 | coding    | PF00122 |
| MSTRG. 21985. 5  | 5957 | coding    | PF00122 |
| MSTRG. 21985. 6  | 3743 | coding    | PF00122 |
| MSTRG. 21985. 7  | 3953 | coding    | PF00122 |
| MSTRG. 21985. 8  | 9683 | coding    | PF00689 |
| MSTRG. 21987. 2  | 7021 | noncoding | -       |
| MSTRG. 21987. 3  | 1700 | noncoding | -       |
| MSTRG. 21965. 1  | 2349 | coding    | PF04062 |
| MSTRG. 21965. 2  | 801  | coding    | PF04062 |
| MSTRG. 21966. 1  | 1157 | noncoding | -       |
| MSTRG. 21967. 1  | 1100 | coding    | PF15107 |
| MSTRG. 21967. 2  | 1094 | coding    | PF15107 |
| MSTRG. 21967. 4  | 1021 | coding    | PF15107 |
| MSTRG. 21967. 5  | 1027 | coding    | PF15107 |
| MSTRG. 21967. 6  | 1099 | coding    | PF15107 |
| MSTRG. 21968. 3  | 775  | noncoding | -       |
| MSTRG. 21971. 1  | 8233 | coding    | PF07773 |
| MSTRG. 21971. 2  | 7731 | coding    | PF07773 |
| MSTRG. 21972. 1  | 1269 | coding    | PF16799 |
| MSTRG. 21994. 4  | 4981 | coding    | PF00017 |

|                  |       |           |         |
|------------------|-------|-----------|---------|
| MSTRG. 21994. 3  | 4984  | coding    | PF00017 |
| MSTRG. 21994. 5  | 3498  | coding    | PF00017 |
| MSTRG. 21996. 12 | 3135  | noncoding | —       |
| MSTRG. 21996. 17 | 10488 | noncoding | —       |
| MSTRG. 21996. 14 | 5533  | coding    | PF14438 |
| MSTRG. 21996. 16 | 3668  | coding    | PF14438 |
| MSTRG. 21996. 9  | 4222  | coding    | PF14438 |
| MSTRG. 21996. 10 | 4067  | coding    | PF14438 |
| MSTRG. 21996. 13 | 5085  | coding    | PF14438 |
| MSTRG. 21996. 6  | 3851  | coding    | PF14438 |
| MSTRG. 21996. 8  | 3995  | coding    | PF14438 |
| MSTRG. 21996. 15 | 3953  | coding    | PF14438 |
| MSTRG. 21997. 1  | 3413  | noncoding | —       |
| MSTRG. 22002. 2  | 4157  | coding    | PF07576 |
| MSTRG. 22005. 4  | 3814  | coding    | PF00441 |
| MSTRG. 22008. 1  | 8009  | noncoding | —       |
| MSTRG. 22008. 2  | 20159 | noncoding | —       |
| MSTRG. 22008. 3  | 1687  | noncoding | —       |
| MSTRG. 22010. 3  | 10129 | coding    | PF00069 |
| MSTRG. 22010. 4  | 8601  | coding    | PF00069 |
| MSTRG. 22010. 5  | 8725  | coding    | PF00069 |
| MSTRG. 22021. 1  | 1502  | noncoding | —       |
| MSTRG. 22014. 1  | 701   | noncoding | —       |
| MSTRG. 22026. 1  | 3283  | noncoding | —       |
| MSTRG. 22028. 1  | 10582 | noncoding | —       |
| MSTRG. 22027. 4  | 3447  | noncoding | —       |
| MSTRG. 22029. 1  | 1527  | noncoding | —       |
| MSTRG. 22027. 6  | 3956  | coding    | PF00069 |
| MSTRG. 22034. 2  | 6953  | coding    | PF00400 |
| MSTRG. 22034. 5  | 4270  | coding    | PF00400 |
| MSTRG. 22030. 3  | 8021  | coding    | PF02898 |
| MSTRG. 22030. 2  | 9162  | coding    | PF02898 |
| MSTRG. 22030. 4  | 9177  | coding    | PF02898 |
| MSTRG. 22038. 3  | 3351  | coding    | PF08755 |
| MSTRG. 22041. 3  | 2411  | noncoding | —       |
| MSTRG. 22041. 4  | 1864  | noncoding | —       |
| MSTRG. 22042. 1  | 461   | noncoding | —       |
| MSTRG. 22043. 1  | 3311  | coding    | PF12937 |
| MSTRG. 22043. 3  | 1309  | noncoding | —       |
| MSTRG. 22043. 4  | 2263  | coding    | PF12937 |
| MSTRG. 22045. 2  | 3852  | noncoding | —       |
| MSTRG. 22046. 2  | 14928 | coding    | PF10218 |
| MSTRG. 22050. 3  | 7878  | coding    | PF11597 |
| MSTRG. 22051. 1  | 955   | noncoding | —       |
| MSTRG. 22051. 2  | 966   | noncoding | —       |
| MSTRG. 22050. 4  | 2428  | noncoding | —       |
| MSTRG. 22056. 1  | 764   | noncoding | —       |
| MSTRG. 22058. 1  | 619   | noncoding | —       |
| MSTRG. 22063. 3  | 5109  | coding    | PF00076 |
| MSTRG. 22063. 4  | 3448  | coding    | PF00076 |
| MSTRG. 22063. 5  | 2369  | coding    | PF00076 |
| MSTRG. 22059. 1  | 963   | noncoding | —       |
| MSTRG. 22059. 2  | 401   | noncoding | —       |
| MSTRG. 22064. 3  | 2634  | coding    | PF04916 |

|                  |       |           |         |
|------------------|-------|-----------|---------|
| MSTRG. 22064. 4  | 2763  | coding    | PF04916 |
| MSTRG. 22065. 2  | 1886  | noncoding | –       |
| MSTRG. 22068. 1  | 3249  | coding    | PF00270 |
| MSTRG. 22071. 2  | 1711  | noncoding | –       |
| MSTRG. 22072. 1  | 5038  | noncoding | –       |
| MSTRG. 22072. 3  | 2021  | noncoding | –       |
| MSTRG. 22074. 1  | 438   | noncoding | –       |
| MSTRG. 22070. 1  | 4589  | coding    | PF10421 |
| MSTRG. 22070. 2  | 4939  | coding    | PF10421 |
| MSTRG. 22075. 2  | 4574  | coding    | PF02318 |
| MSTRG. 22075. 3  | 4818  | coding    | PF02318 |
| MSTRG. 22075. 4  | 4570  | coding    | PF02318 |
| MSTRG. 22076. 1  | 260   | noncoding | –       |
| MSTRG. 22078. 3  | 2721  | coding    | PF00102 |
| MSTRG. 22080. 1  | 1057  | coding    | PF01159 |
| MSTRG. 22080. 6  | 1110  | coding    | PF01159 |
| MSTRG. 22113. 6  | 11472 | noncoding | –       |
| MSTRG. 22113. 5  | 15602 | coding    | PF00632 |
| MSTRG. 22113. 7  | 11653 | noncoding | –       |
| MSTRG. 22114. 1  | 3722  | noncoding | –       |
| MSTRG. 22113. 9  | 9757  | noncoding | –       |
| MSTRG. 22115. 3  | 3088  | noncoding | –       |
| MSTRG. 22116. 1  | 1539  | noncoding | –       |
| MSTRG. 22117. 1  | 534   | noncoding | –       |
| MSTRG. 22118. 4  | 3186  | coding    | PF09797 |
| MSTRG. 22118. 2  | 4982  | coding    | PF09797 |
| MSTRG. 22118. 3  | 4271  | coding    | PF09797 |
| MSTRG. 22118. 5  | 3907  | coding    | PF09797 |
| MSTRG. 22126. 1  | 3598  | coding    | PF01421 |
| MSTRG. 22126. 2  | 3488  | coding    | PF01421 |
| MSTRG. 22126. 3  | 6169  | coding    | PF01421 |
| MSTRG. 22126. 4  | 3486  | coding    | PF01421 |
| MSTRG. 22126. 5  | 3053  | coding    | PF01421 |
| MSTRG. 22126. 10 | 3150  | coding    | PF01421 |
| MSTRG. 22082. 3  | 9223  | noncoding | –       |
| MSTRG. 22082. 5  | 7693  | noncoding | –       |
| MSTRG. 22082. 4  | 7858  | noncoding | –       |
| MSTRG. 22084. 2  | 10290 | coding    | PF03535 |
| MSTRG. 22086. 1  | 704   | coding    | PF02146 |
| MSTRG. 22089. 3  | 3094  | noncoding | –       |
| MSTRG. 22089. 4  | 4943  | coding    | PF00076 |
| MSTRG. 22089. 5  | 1469  | noncoding | –       |
| MSTRG. 22091. 1  | 668   | coding    | PF01221 |
| MSTRG. 22091. 3  | 747   | coding    | PF01221 |
| MSTRG. 22098. 2  | 3015  | coding    | PF01900 |
| MSTRG. 22099. 2  | 1477  | coding    | PF13499 |
| MSTRG. 22103. 2  | 4016  | coding    | PF05351 |
| MSTRG. 22139. 5  | 2201  | coding    | PF01412 |
| MSTRG. 22139. 6  | 3140  | coding    | PF12205 |
| MSTRG. 22141. 1  | 1740  | noncoding | –       |
| MSTRG. 22141. 2  | 3380  | noncoding | –       |
| MSTRG. 22141. 3  | 780   | noncoding | –       |
| MSTRG. 22142. 1  | 1796  | coding    | PF08718 |
| MSTRG. 22145. 2  | 877   | coding    | PF01923 |



|                  |       |           |         |
|------------------|-------|-----------|---------|
| MSTRG. 22146. 1  | 7258  | coding    | PF00632 |
| MSTRG. 22146. 2  | 7220  | coding    | PF00632 |
| MSTRG. 22146. 3  | 6868  | coding    | PF00632 |
| MSTRG. 22147. 2  | 3547  | coding    | PF02214 |
| MSTRG. 22147. 3  | 4322  | coding    | PF02214 |
| MSTRG. 22155. 1  | 8805  | coding    | PF08326 |
| MSTRG. 22155. 2  | 8705  | coding    | PF08326 |
| MSTRG. 22155. 4  | 7651  | coding    | PF08326 |
| MSTRG. 22155. 3  | 7527  | coding    | PF08326 |
| MSTRG. 22155. 7  | 918   | coding    | PF00289 |
| MSTRG. 22150. 1  | 2240  | noncoding | —       |
| MSTRG. 22152. 2  | 8043  | coding    | PF00782 |
| MSTRG. 22152. 3  | 8091  | coding    | PF00782 |
| MSTRG. 22152. 5  | 9084  | coding    | PF00782 |
| MSTRG. 22153. 1  | 3803  | coding    | PF08953 |
| MSTRG. 22168. 1  | 5539  | noncoding | —       |
| MSTRG. 22179. 1  | 29808 | coding    | PF02994 |
| MSTRG. 22179. 2  | 7590  | coding    | PF15229 |
| MSTRG. 22179. 3  | 12282 | noncoding | —       |
| MSTRG. 22179. 4  | 20255 | noncoding | —       |
| MSTRG. 22179. 5  | 19288 | noncoding | —       |
| MSTRG. 22179. 7  | 8547  | noncoding | —       |
| MSTRG. 22179. 8  | 3450  | noncoding | —       |
| MSTRG. 22179. 9  | 4625  | noncoding | —       |
| MSTRG. 22179. 6  | 8815  | noncoding | —       |
| MSTRG. 22179. 10 | 8974  | noncoding | —       |
| MSTRG. 22179. 11 | 8785  | noncoding | —       |
| MSTRG. 22179. 13 | 9001  | noncoding | —       |
| MSTRG. 22179. 12 | 5255  | noncoding | —       |
| MSTRG. 22179. 14 | 2654  | noncoding | —       |
| MSTRG. 22179. 15 | 31423 | noncoding | —       |
| MSTRG. 22179. 16 | 32402 | noncoding | —       |
| MSTRG. 22181. 1  | 10550 | noncoding | —       |
| MSTRG. 22181. 2  | 11045 | noncoding | —       |
| MSTRG. 22181. 3  | 10692 | noncoding | —       |
| MSTRG. 22181. 4  | 6918  | noncoding | —       |
| MSTRG. 22181. 5  | 36338 | coding    | PF02171 |
| MSTRG. 22181. 6  | 20101 | coding    | PF02171 |
| MSTRG. 22182. 1  | 3332  | coding    | PF02171 |
| MSTRG. 22182. 3  | 2622  | coding    | PF02171 |
| MSTRG. 22181. 7  | 7829  | coding    | PF02171 |
| MSTRG. 22184. 1  | 11115 | coding    | PF15327 |
| MSTRG. 22184. 2  | 7108  | noncoding | —       |
| MSTRG. 22184. 3  | 11155 | coding    | PF15327 |
| MSTRG. 22184. 5  | 18177 | coding    | PF15327 |
| MSTRG. 22184. 6  | 11522 | coding    | PF15327 |
| MSTRG. 22185. 1  | 3880  | noncoding | —       |
| MSTRG. 22170. 2  | 1892  | coding    | PF00030 |
| MSTRG. 22172. 3  | 1271  | coding    | PF00069 |
| MSTRG. 22175. 1  | 8156  | noncoding | —       |
| MSTRG. 22175. 2  | 7384  | noncoding | —       |
| MSTRG. 22189. 2  | 1004  | noncoding | —       |
| MSTRG. 22190. 1  | 1841  | noncoding | —       |
| MSTRG. 22190. 2  | 4986  | noncoding | —       |

|                |       |           |         |
|----------------|-------|-----------|---------|
| MSTRG. 22191.2 | 4051  | noncoding | -       |
| MSTRG. 22192.3 | 4241  | noncoding | -       |
| MSTRG. 22195.3 | 2014  | noncoding | -       |
| MSTRG. 22195.2 | 2159  | noncoding | -       |
| MSTRG. 22178.2 | 1259  | noncoding | -       |
| MSTRG. 22178.3 | 9445  | noncoding | -       |
| MSTRG. 22188.1 | 991   | noncoding | -       |
| MSTRG. 22197.1 | 347   | noncoding | -       |
| MSTRG. 22219.1 | 10386 | coding    | PF02121 |
| MSTRG. 22220.1 | 594   | noncoding | -       |
| MSTRG. 22219.2 | 1398  | coding    | PF02121 |
| MSTRG. 22219.5 | 4918  | coding    | PF02121 |
| MSTRG. 22219.3 | 6664  | coding    | PF02121 |
| MSTRG. 22223.5 | 1672  | noncoding | -       |
| MSTRG. 22224.1 | 8487  | noncoding | -       |
| MSTRG. 22226.1 | 19619 | noncoding | -       |
| MSTRG. 22228.1 | 23063 | noncoding | -       |
| MSTRG. 22228.2 | 1179  | noncoding | -       |
| MSTRG. 22223.6 | 4163  | noncoding | -       |
| MSTRG. 22230.1 | 2053  | noncoding | -       |
| MSTRG. 22199.1 | 492   | noncoding | -       |
| MSTRG. 22200.1 | 3665  | noncoding | -       |
| MSTRG. 22203.2 | 1009  | coding    | PF15578 |
| MSTRG. 22204.1 | 894   | noncoding | -       |
| MSTRG. 22205.1 | 1889  | coding    | PF00051 |
| MSTRG. 22205.2 | 1736  | coding    | PF01822 |
| MSTRG. 22205.4 | 2602  | coding    | PF01822 |
| MSTRG. 22207.3 | 1840  | noncoding | -       |
| MSTRG. 22207.7 | 1752  | noncoding | -       |
| MSTRG. 22207.9 | 1731  | noncoding | -       |
| MSTRG. 22208.4 | 1984  | noncoding | -       |
| MSTRG. 22211.5 | 2562  | coding    | PF09066 |
| MSTRG. 22212.2 | 2577  | coding    | PF09766 |
| MSTRG. 22212.3 | 2257  | coding    | PF09766 |
| MSTRG. 22213.4 | 2745  | coding    | PF07978 |
| MSTRG. 22213.5 | 3106  | coding    | PF07978 |
| MSTRG. 22213.2 | 3682  | coding    | PF07978 |
| MSTRG. 22213.3 | 3278  | coding    | PF07978 |
| MSTRG. 22214.4 | 3320  | noncoding | -       |
| MSTRG. 22216.7 | 2605  | noncoding | -       |
| MSTRG. 22217.1 | 1880  | noncoding | -       |
| MSTRG. 22238.4 | 9632  | noncoding | -       |
| MSTRG. 22238.6 | 9104  | noncoding | -       |
| MSTRG. 22238.7 | 4116  | noncoding | -       |
| MSTRG. 22239.1 | 10653 | noncoding | -       |
| MSTRG. 22240.1 | 1754  | noncoding | -       |
| MSTRG. 22241.1 | 1271  | coding    | PF02301 |
| MSTRG. 22242.2 | 1734  | coding    | PF13840 |
| MSTRG. 22242.3 | 1351  | coding    | PF13840 |
| MSTRG. 22242.4 | 1505  | coding    | PF13840 |
| MSTRG. 22245.2 | 2656  | coding    | PF01805 |
| MSTRG. 22246.3 | 2296  | noncoding | -       |
| MSTRG. 22251.3 | 1787  | noncoding | -       |
| MSTRG. 22251.2 | 2287  | coding    | PF00650 |

|                  |       |           |         |
|------------------|-------|-----------|---------|
| MSTRG. 22251. 4  | 2187  | coding    | PF00650 |
| MSTRG. 22261. 1  | 12174 | coding    | PF00782 |
| MSTRG. 22261. 2  | 3015  | coding    | PF00782 |
| MSTRG. 22262. 2  | 675   | noncoding | —       |
| MSTRG. 22262. 3  | 1147  | noncoding | —       |
| MSTRG. 22262. 4  | 1858  | noncoding | —       |
| MSTRG. 22262. 5  | 670   | noncoding | —       |
| MSTRG. 22265. 1  | 398   | noncoding | —       |
| MSTRG. 22264. 3  | 3543  | coding    | PF01237 |
| MSTRG. 22264. 4  | 3815  | coding    | PF01237 |
| MSTRG. 22276. 2  | 4046  | noncoding | —       |
| MSTRG. 22277. 1  | 4600  | coding    | PF13589 |
| MSTRG. 22277. 3  | 4342  | coding    | PF13589 |
| MSTRG. 22277. 10 | 3031  | coding    | PF07496 |
| MSTRG. 22277. 5  | 2977  | coding    | PF07496 |
| MSTRG. 22277. 9  | 5325  | coding    | PF07496 |
| MSTRG. 22277. 7  | 5369  | coding    | PF07496 |
| MSTRG. 22277. 11 | 2179  | noncoding | —       |
| MSTRG. 22269. 2  | 4455  | noncoding | —       |
| MSTRG. 22269. 3  | 2672  | noncoding | —       |
| MSTRG. 22271. 1  | 870   | noncoding | —       |
| MSTRG. 22282. 1  | 4950  | noncoding | —       |
| MSTRG. 22282. 2  | 12396 | coding    | PF16637 |
| MSTRG. 22282. 3  | 12216 | coding    | PF16637 |
| MSTRG. 22283. 3  | 9606  | coding    | PF16897 |
| MSTRG. 22284. 2  | 3507  | coding    | PF10477 |
| MSTRG. 22285. 1  | 4050  | noncoding | —       |
| MSTRG. 22286. 3  | 2341  | coding    | PF02666 |
| MSTRG. 22286. 6  | 2412  | coding    | PF02666 |
| MSTRG. 22301. 1  | 1076  | noncoding | —       |
| MSTRG. 22309. 1  | 562   | noncoding | —       |
| MSTRG. 22310. 1  | 3687  | noncoding | —       |
| MSTRG. 22312. 3  | 1908  | coding    | PF13836 |
| MSTRG. 22312. 2  | 1548  | coding    | PF13836 |
| MSTRG. 22306. 4  | 659   | coding    | PF07654 |
| MSTRG. 22315. 1  | 418   | coding    | PF07654 |
| MSTRG. 22306. 5  | 369   | noncoding | —       |
| MSTRG. 22306. 7  | 822   | coding    | PF07654 |
| MSTRG. 22306. 8  | 462   | coding    | PF07654 |
| MSTRG. 22306. 6  | 509   | coding    | PF07654 |
| MSTRG. 22306. 9  | 513   | coding    | PF07654 |
| MSTRG. 22306. 11 | 576   | coding    | PF07654 |
| MSTRG. 22295. 1  | 5088  | noncoding | —       |
| MSTRG. 22295. 3  | 701   | noncoding | —       |
| MSTRG. 22299. 3  | 1481  | coding    | PF04855 |
| MSTRG. 22300. 1  | 565   | coding    | PF04511 |
| MSTRG. 22300. 3  | 788   | coding    | PF04511 |
| MSTRG. 22300. 4  | 604   | noncoding | —       |
| MSTRG. 22316. 1  | 22121 | coding    | PF01187 |
| MSTRG. 22316. 2  | 8466  | coding    | PF01187 |
| MSTRG. 22319. 2  | 838   | coding    | PF02798 |
| MSTRG. 22319. 3  | 1182  | noncoding | —       |
| MSTRG. 22332. 7  | 7882  | noncoding | —       |
| MSTRG. 22326. 2  | 2760  | coding    | PF01019 |

|                  |      |           |         |
|------------------|------|-----------|---------|
| MSTRG. 22327. 1  | 2399 | coding    | PF01019 |
| MSTRG. 22327. 3  | 2534 | coding    | PF01019 |
| MSTRG. 22325. 1  | 2684 | noncoding | –       |
| MSTRG. 22335. 2  | 1652 | coding    | PF00001 |
| MSTRG. 22335. 3  | 1317 | coding    | PF00001 |
| MSTRG. 22341. 2  | 2653 | noncoding | –       |
| MSTRG. 22341. 3  | 4994 | noncoding | –       |
| MSTRG. 22344. 1  | 1956 | noncoding | –       |
| MSTRG. 22344. 2  | 1618 | noncoding | –       |
| MSTRG. 22344. 4  | 1699 | noncoding | –       |
| MSTRG. 22344. 5  | 1322 | coding    | PF00503 |
| MSTRG. 22344. 7  | 1058 | noncoding | –       |
| MSTRG. 22344. 9  | 1869 | coding    | PF00503 |
| MSTRG. 22346. 1  | 261  | noncoding | –       |
| MSTRG. 22344. 11 | 665  | noncoding | –       |
| MSTRG. 22338. 2  | 2822 | coding    | PF00474 |
| MSTRG. 22338. 4  | 1840 | coding    | PF00474 |
| MSTRG. 22340. 2  | 1633 | noncoding | –       |
| MSTRG. 22348. 3  | 6237 | coding    | PF00069 |
| MSTRG. 22355. 2  | 2014 | noncoding | –       |
| MSTRG. 22356. 1  | 3851 | coding    | PF00160 |
| MSTRG. 22356. 4  | 2659 | coding    | PF00160 |
| MSTRG. 22356. 5  | 3895 | coding    | PF00160 |
| MSTRG. 22356. 3  | 4714 | coding    | PF00160 |
| MSTRG. 22351. 2  | 2214 | coding    | PF15774 |
| MSTRG. 22351. 3  | 2212 | coding    | PF15774 |
| MSTRG. 22358. 2  | 742  | noncoding | –       |
| MSTRG. 22359. 2  | 6741 | coding    | PF00454 |
| MSTRG. 22361. 2  | 6656 | noncoding | –       |
| MSTRG. 22370. 2  | 3217 | coding    | PF00651 |
| MSTRG. 22370. 4  | 3168 | coding    | PF00651 |
| MSTRG. 22378. 3  | 4216 | coding    | PF14724 |
| MSTRG. 22378. 5  | 3258 | coding    | PF14724 |
| MSTRG. 22378. 6  | 3928 | coding    | PF14724 |
| MSTRG. 22378. 7  | 6088 | coding    | PF14724 |
| MSTRG. 22367. 3  | 3286 | coding    | PF09606 |
| MSTRG. 22367. 4  | 9929 | coding    | PF09606 |
| MSTRG. 22367. 5  | 5417 | coding    | PF09606 |
| MSTRG. 22382. 1  | 9666 | coding    | PF00069 |
| MSTRG. 22382. 4  | 4302 | coding    | PF00069 |
| MSTRG. 22382. 5  | 3457 | noncoding | –       |
| MSTRG. 22382. 8  | 3762 | noncoding | –       |
| MSTRG. 22382. 6  | 7439 | coding    | PF00069 |
| MSTRG. 22382. 7  | 4401 | coding    | PF00069 |
| MSTRG. 22382. 9  | 4150 | coding    | PF00069 |
| MSTRG. 22383. 1  | 1418 | coding    | PF00069 |
| MSTRG. 22383. 2  | 1418 | coding    | PF00069 |
| MSTRG. 22383. 3  | 1418 | coding    | PF00069 |
| MSTRG. 22383. 4  | 1418 | coding    | PF00069 |
| MSTRG. 22390. 8  | 7029 | coding    | PF07569 |
| MSTRG. 22390. 7  | 5288 | coding    | PF07569 |
| MSTRG. 22390. 6  | 3904 | coding    | PF07569 |
| MSTRG. 22390. 2  | 4023 | coding    | PF07569 |
| MSTRG. 22391. 2  | 807  | coding    | PF09812 |

|                  |      |           |         |
|------------------|------|-----------|---------|
| MSTRG. 22391. 4  | 1305 | coding    | PF09812 |
| MSTRG. 22392. 2  | 3927 | noncoding | –       |
| MSTRG. 22392. 4  | 720  | noncoding | –       |
| MSTRG. 22394. 2  | 1380 | noncoding | –       |
| MSTRG. 22394. 3  | 1773 | coding    | PF03152 |
| MSTRG. 22385. 2  | 5355 | coding    | PF00735 |
| MSTRG. 22386. 2  | 1702 | coding    | PF00907 |
| MSTRG. 22397. 2  | 1884 | coding    | PF07992 |
| MSTRG. 22397. 3  | 1840 | coding    | PF07992 |
| MSTRG. 22397. 4  | 2837 | coding    | PF07992 |
| MSTRG. 22398. 1  | 2501 | noncoding | –       |
| MSTRG. 22399. 1  | 3779 | noncoding | –       |
| MSTRG. 22399. 2  | 3342 | noncoding | –       |
| MSTRG. 22400. 1  | 1992 | noncoding | –       |
| MSTRG. 22402. 2  | 1392 | coding    | PF05742 |
| MSTRG. 22402. 3  | 1152 | coding    | PF05742 |
| MSTRG. 22403. 1  | 4653 | noncoding | –       |
| MSTRG. 22406. 2  | 909  | coding    | PF00638 |
| MSTRG. 22406. 5  | 881  | coding    | PF00638 |
| MSTRG. 22411. 2  | 2223 | noncoding | –       |
| MSTRG. 22411. 1  | 3130 | noncoding | –       |
| MSTRG. 22407. 1  | 1698 | coding    | PF13855 |
| MSTRG. 22407. 2  | 2033 | coding    | PF13855 |
| MSTRG. 22408. 1  | 2032 | noncoding | –       |
| MSTRG. 22419. 1  | 993  | noncoding | –       |
| MSTRG. 22420. 1  | 3383 | noncoding | –       |
| MSTRG. 22417. 1  | 951  | noncoding | –       |
| MSTRG. 22417. 2  | 1070 | noncoding | –       |
| MSTRG. 22426. 1  | 565  | noncoding | –       |
| MSTRG. 22428. 2  | 3153 | coding    | PF12755 |
| MSTRG. 22430. 2  | 5697 | coding    | PF10433 |
| MSTRG. 22435. 2  | 4477 | coding    | PF07959 |
| MSTRG. 22431. 1  | 2398 | coding    | PF00777 |
| MSTRG. 22444. 7  | 2290 | coding    | PF00271 |
| MSTRG. 22444. 5  | 2467 | coding    | PF00271 |
| MSTRG. 22449. 1  | 3572 | coding    | PF01411 |
| MSTRG. 22444. 10 | 310  | noncoding | –       |
| MSTRG. 22449. 3  | 3715 | coding    | PF01411 |
| MSTRG. 22449. 4  | 3768 | coding    | PF01411 |
| MSTRG. 22449. 5  | 3772 | coding    | PF01411 |
| MSTRG. 22449. 9  | 3766 | coding    | PF01411 |
| MSTRG. 22449. 10 | 3628 | coding    | PF01411 |
| MSTRG. 22451. 3  | 7948 | coding    | PF01571 |
| MSTRG. 22451. 8  | 7444 | coding    | PF01571 |
| MSTRG. 22451. 5  | 7049 | coding    | PF01571 |
| MSTRG. 22451. 9  | 6987 | coding    | PF01571 |
| MSTRG. 22451. 13 | 1759 | coding    | PF01571 |
| MSTRG. 22451. 14 | 4168 | coding    | PF01571 |
| MSTRG. 22451. 11 | 4157 | coding    | PF01571 |
| MSTRG. 22451. 12 | 3339 | coding    | PF01571 |
| MSTRG. 22442. 1  | 2538 | noncoding | –       |
| MSTRG. 22459. 3  | 6146 | coding    | PF17034 |
| MSTRG. 22459. 1  | 2707 | coding    | PF17034 |
| MSTRG. 22459. 4  | 3032 | coding    | PF17034 |

|                  |       |           |         |
|------------------|-------|-----------|---------|
| MSTRG. 22459. 5  | 2409  | coding    | PF17034 |
| MSTRG. 22459. 6  | 3394  | coding    | PF17034 |
| MSTRG. 22460. 1  | 11914 | noncoding | —       |
| MSTRG. 22460. 2  | 1679  | noncoding | —       |
| MSTRG. 22461. 1  | 1146  | noncoding | —       |
| MSTRG. 22461. 2  | 690   | coding    | PF13639 |
| MSTRG. 22461. 4  | 1772  | noncoding | —       |
| MSTRG. 22461. 5  | 751   | coding    | PF13639 |
| MSTRG. 22461. 6  | 1412  | noncoding | —       |
| MSTRG. 22454. 1  | 2889  | coding    | PF00089 |
| MSTRG. 22454. 2  | 2503  | coding    | PF00089 |
| MSTRG. 22455. 3  | 3986  | coding    | PF12026 |
| MSTRG. 22464. 1  | 12812 | noncoding | —       |
| MSTRG. 22465. 1  | 5777  | noncoding | —       |
| MSTRG. 22466. 1  | 7100  | noncoding | —       |
| MSTRG. 22478. 3  | 2378  | noncoding | —       |
| MSTRG. 22478. 2  | 5767  | noncoding | —       |
| MSTRG. 22478. 4  | 2821  | noncoding | —       |
| MSTRG. 22478. 5  | 5767  | noncoding | —       |
| MSTRG. 22478. 7  | 6840  | coding    | PF03184 |
| MSTRG. 22478. 6  | 6604  | coding    | PF03184 |
| MSTRG. 22478. 10 | 3325  | noncoding | —       |
| MSTRG. 22478. 11 | 2634  | noncoding | —       |
| MSTRG. 22480. 1  | 3488  | noncoding | —       |
| MSTRG. 22482. 1  | 334   | noncoding | —       |
| MSTRG. 22490. 1  | 2110  | coding    | PF00009 |
| MSTRG. 22490. 2  | 1010  | coding    | PF00009 |
| MSTRG. 22490. 3  | 2048  | coding    | PF00009 |
| MSTRG. 22490. 4  | 1534  | coding    | PF00009 |
| MSTRG. 22490. 5  | 2159  | coding    | PF00009 |
| MSTRG. 22490. 6  | 1706  | coding    | PF00009 |
| MSTRG. 22490. 7  | 2185  | coding    | PF00009 |
| MSTRG. 22490. 9  | 2022  | coding    | PF00009 |
| MSTRG. 22468. 1  | 407   | noncoding | —       |
| MSTRG. 22469. 1  | 2232  | noncoding | —       |
| MSTRG. 22476. 1  | 576   | noncoding | —       |
| MSTRG. 22477. 1  | 1250  | noncoding | —       |
| MSTRG. 22519. 1  | 4111  | coding    | PF03164 |
| MSTRG. 22521. 1  | 1326  | noncoding | —       |
| MSTRG. 22517. 1  | 636   | noncoding | —       |
| MSTRG. 22517. 2  | 2517  | noncoding | —       |
| MSTRG. 22517. 3  | 1941  | noncoding | —       |
| MSTRG. 22524. 1  | 735   | noncoding | —       |
| MSTRG. 22526. 1  | 2172  | noncoding | —       |
| MSTRG. 22539. 1  | 371   | noncoding | —       |
| MSTRG. 22542. 2  | 3403  | coding    | PF03131 |
| MSTRG. 22544. 1  | 797   | noncoding | —       |
| MSTRG. 22544. 2  | 646   | noncoding | —       |
| MSTRG. 22528. 1  | 316   | noncoding | —       |
| MSTRG. 22530. 1  | 1252  | noncoding | —       |
| MSTRG. 22549. 1  | 4585  | noncoding | —       |
| MSTRG. 22549. 2  | 4386  | noncoding | —       |
| MSTRG. 22551. 3  | 917   | noncoding | —       |
| MSTRG. 22551. 2  | 1480  | coding    | PF08583 |

|                |       |           |         |
|----------------|-------|-----------|---------|
| MSTRG. 22551.4 | 619   | noncoding | -       |
| MSTRG. 22551.5 | 506   | noncoding | -       |
| MSTRG. 22552.2 | 1985  | coding    | PF05238 |
| MSTRG. 22550.2 | 5057  | noncoding | -       |
| MSTRG. 22553.3 | 1791  | coding    | PF15032 |
| MSTRG. 22563.1 | 12310 | coding    | PF07707 |
| MSTRG. 22563.3 | 2984  | noncoding | -       |
| MSTRG. 22564.3 | 2747  | noncoding | -       |
| MSTRG. 22572.1 | 4616  | coding    | PF00388 |
| MSTRG. 22574.1 | 2549  | noncoding | -       |
| MSTRG. 22572.2 | 5164  | coding    | PF00388 |
| MSTRG. 22572.3 | 4384  | coding    | PF00388 |
| MSTRG. 22576.1 | 831   | noncoding | -       |
| MSTRG. 22580.1 | 1281  | noncoding | -       |
| MSTRG. 22579.3 | 686   | noncoding | -       |
| MSTRG. 22579.4 | 669   | noncoding | -       |
| MSTRG. 22583.2 | 692   | coding    | PF06825 |
| MSTRG. 22583.5 | 811   | coding    | PF06825 |
| MSTRG. 22592.2 | 2038  | noncoding | -       |
| MSTRG. 22592.3 | 2041  | noncoding | -       |
| MSTRG. 22592.4 | 2137  | noncoding | -       |
| MSTRG. 22585.2 | 1568  | noncoding | -       |
| MSTRG. 22585.1 | 1099  | noncoding | -       |
| MSTRG. 22593.4 | 4684  | coding    | PF00082 |
| MSTRG. 22598.2 | 1825  | coding    | PF02137 |
| MSTRG. 22598.4 | 1705  | coding    | PF02137 |
| MSTRG. 22599.1 | 1915  | noncoding | -       |
| MSTRG. 22599.2 | 1370  | noncoding | -       |
| MSTRG. 22599.3 | 1325  | noncoding | -       |
| MSTRG. 22599.4 | 781   | noncoding | -       |
| MSTRG. 22599.5 | 4030  | noncoding | -       |
| MSTRG. 22605.1 | 4860  | coding    | PF07534 |
| MSTRG. 22607.3 | 6754  | noncoding | -       |
| MSTRG. 22609.1 | 2601  | noncoding | -       |
| MSTRG. 22608.2 | 5551  | noncoding | -       |
| MSTRG. 22610.1 | 5366  | noncoding | -       |
| MSTRG. 22610.2 | 4683  | coding    | PF01140 |
| MSTRG. 22611.1 | 3588  | coding    | PF02093 |
| MSTRG. 22612.1 | 6310  | noncoding | -       |
| MSTRG. 22608.4 | 3968  | coding    | PF03815 |
| MSTRG. 22617.3 | 7384  | noncoding | -       |
| MSTRG. 22617.1 | 7612  | noncoding | -       |
| MSTRG. 22617.4 | 7251  | noncoding | -       |
| MSTRG. 22618.1 | 1776  | coding    | PF06730 |
| MSTRG. 22627.2 | 31057 | coding    | PF12540 |
| MSTRG. 22627.3 | 7940  | coding    | PF12540 |
| MSTRG. 22627.4 | 7056  | coding    | PF12540 |
| MSTRG. 22627.5 | 7180  | coding    | PF12540 |
| MSTRG. 22627.6 | 8083  | coding    | PF12540 |
| MSTRG. 22627.7 | 7196  | coding    | PF12540 |
| MSTRG. 22627.8 | 7298  | coding    | PF12540 |
| MSTRG. 22621.2 | 1072  | coding    | PF03665 |
| MSTRG. 22624.2 | 2179  | coding    | PF10401 |
| MSTRG. 22633.4 | 1606  | noncoding | -       |

|                 |       |           |         |
|-----------------|-------|-----------|---------|
| MSTRG. 22634. 3 | 3279  | noncoding | -       |
| MSTRG. 22644. 1 | 7457  | coding    | PF15132 |
| MSTRG. 22644. 4 | 780   | coding    | PF15132 |
| MSTRG. 22644. 5 | 786   | coding    | PF15132 |
| MSTRG. 22644. 3 | 1269  | coding    | PF15132 |
| MSTRG. 22646. 1 | 2234  | coding    | PF02991 |
| MSTRG. 22646. 2 | 2636  | coding    | PF02991 |
| MSTRG. 22646. 4 | 4578  | coding    | PF02991 |
| MSTRG. 22650. 1 | 674   | noncoding | -       |
| MSTRG. 22650. 5 | 885   | noncoding | -       |
| MSTRG. 22650. 6 | 1818  | noncoding | -       |
| MSTRG. 22650. 3 | 1181  | noncoding | -       |
| MSTRG. 22650. 4 | 933   | noncoding | -       |
| MSTRG. 22650. 7 | 1063  | noncoding | -       |
| MSTRG. 22639. 2 | 1931  | noncoding | -       |
| MSTRG. 22651. 3 | 2311  | noncoding | -       |
| MSTRG. 22651. 4 | 3430  | noncoding | -       |
| MSTRG. 22651. 5 | 3535  | noncoding | -       |
| MSTRG. 22651. 6 | 3526  | noncoding | -       |
| MSTRG. 22651. 7 | 3439  | noncoding | -       |
| MSTRG. 22654. 1 | 1198  | noncoding | -       |
| MSTRG. 22656. 1 | 7588  | noncoding | -       |
| MSTRG. 22660. 2 | 1926  | noncoding | -       |
| MSTRG. 22668. 2 | 1961  | noncoding | -       |
| MSTRG. 22664. 1 | 4550  | coding    | PF00884 |
| MSTRG. 22683. 4 | 1592  | noncoding | -       |
| MSTRG. 22684. 1 | 2351  | noncoding | -       |
| MSTRG. 22686. 2 | 9024  | coding    | PF12796 |
| MSTRG. 22686. 3 | 9052  | coding    | PF12796 |
| MSTRG. 22689. 1 | 19557 | noncoding | -       |
| MSTRG. 22679. 1 | 5395  | coding    | PF01294 |
| MSTRG. 22703. 3 | 1654  | noncoding | -       |
| MSTRG. 22703. 2 | 1169  | noncoding | -       |
| MSTRG. 22709. 2 | 1969  | noncoding | -       |
| MSTRG. 22713. 1 | 5910  | coding    | PF16474 |
| MSTRG. 22713. 5 | 2735  | coding    | PF16474 |
| MSTRG. 22713. 4 | 2662  | coding    | PF16474 |
| MSTRG. 22714. 1 | 2999  | noncoding | -       |
| MSTRG. 22694. 2 | 5430  | coding    | PF13901 |
| MSTRG. 22718. 1 | 3277  | noncoding | -       |
| MSTRG. 22718. 2 | 9494  | noncoding | -       |
| MSTRG. 22718. 3 | 4915  | noncoding | -       |
| MSTRG. 22718. 4 | 2546  | noncoding | -       |
| MSTRG. 22721. 1 | 4358  | noncoding | -       |
| MSTRG. 22722. 1 | 3188  | noncoding | -       |
| MSTRG. 22725. 1 | 1044  | noncoding | -       |
| MSTRG. 22731. 2 | 3884  | noncoding | -       |
| MSTRG. 22733. 1 | 1276  | coding    | PF01359 |
| MSTRG. 22733. 2 | 1285  | coding    | PF01359 |
| MSTRG. 22737. 2 | 5235  | noncoding | -       |
| MSTRG. 22739. 1 | 1284  | noncoding | -       |
| MSTRG. 22740. 1 | 1479  | coding    | PF00723 |
| MSTRG. 22740. 2 | 2199  | coding    | PF00723 |
| MSTRG. 22740. 4 | 1212  | coding    | PF00723 |



|                 |       |           |          |
|-----------------|-------|-----------|----------|
| MSTRG. 22742. 1 | 3386  | noncoding | -        |
| MSTRG. 22742. 2 | 4054  | noncoding | -        |
| MSTRG. 22744. 2 | 4964  | coding    | PF000005 |
| MSTRG. 22744. 3 | 5198  | coding    | PF000005 |
| MSTRG. 22744. 5 | 6019  | coding    | PF000005 |
| MSTRG. 22744. 4 | 5019  | coding    | PF000005 |
| MSTRG. 22744. 6 | 4956  | coding    | PF000005 |
| MSTRG. 22744. 8 | 3401  | coding    | PF02994  |
| MSTRG. 22746. 1 | 4818  | coding    | PF000005 |
| MSTRG. 22747. 1 | 1287  | coding    | PF05362  |
| MSTRG. 22747. 3 | 6294  | noncoding | -        |
| MSTRG. 22747. 4 | 3031  | coding    | PF05362  |
| MSTRG. 22749. 4 | 6263  | coding    | PF03145  |
| MSTRG. 22750. 5 | 2168  | noncoding | -        |
| MSTRG. 22755. 1 | 693   | noncoding | -        |
| MSTRG. 22763. 2 | 2472  | coding    | PF03828  |
| MSTRG. 22763. 4 | 2354  | coding    | PF03828  |
| MSTRG. 22763. 5 | 2226  | coding    | PF03828  |
| MSTRG. 22763. 6 | 2259  | coding    | PF03828  |
| MSTRG. 22764. 1 | 3322  | coding    | PF12024  |
| MSTRG. 22764. 3 | 2221  | coding    | PF12024  |
| MSTRG. 22770. 2 | 7626  | coding    | PF16607  |
| MSTRG. 22774. 1 | 379   | noncoding | -        |
| MSTRG. 22776. 1 | 468   | noncoding | -        |
| MSTRG. 22779. 1 | 627   | noncoding | -        |
| MSTRG. 22780. 1 | 575   | noncoding | -        |
| MSTRG. 22790. 3 | 9246  | coding    | PF00176  |
| MSTRG. 22790. 4 | 10855 | coding    | PF00176  |
| MSTRG. 22790. 5 | 10917 | coding    | PF00176  |
| MSTRG. 22793. 1 | 1416  | noncoding | -        |
| MSTRG. 22798. 3 | 4261  | coding    | PF01858  |
| MSTRG. 22800. 5 | 2303  | coding    | PF00179  |
| MSTRG. 22800. 3 | 1920  | coding    | PF00179  |
| MSTRG. 22784. 1 | 4548  | coding    | PF11618  |
| MSTRG. 22785. 4 | 8211  | coding    | PF12933  |
| MSTRG. 22785. 5 | 3888  | coding    | PF12933  |
| MSTRG. 22785. 6 | 11797 | noncoding | -        |
| MSTRG. 22786. 1 | 890   | noncoding | -        |
| MSTRG. 22787. 1 | 2532  | noncoding | -        |
| MSTRG. 22789. 2 | 1386  | coding    | PF00045  |
| MSTRG. 22803. 1 | 454   | noncoding | -        |
| MSTRG. 22804. 1 | 1466  | coding    | PF00135  |
| MSTRG. 22804. 3 | 1848  | coding    | PF00135  |
| MSTRG. 22804. 4 | 1851  | coding    | PF00135  |
| MSTRG. 22806. 2 | 318   | noncoding | -        |
| MSTRG. 22811. 1 | 3664  | coding    | PF13639  |
| MSTRG. 22812. 3 | 7447  | coding    | PF00503  |
| MSTRG. 22813. 1 | 8471  | noncoding | -        |
| MSTRG. 22814. 2 | 3102  | coding    | PF00135  |
| MSTRG. 22818. 2 | 2843  | coding    | PF04097  |
| MSTRG. 22819. 2 | 1726  | noncoding | -        |
| MSTRG. 22819. 1 | 4231  | noncoding | -        |
| MSTRG. 22822. 2 | 967   | coding    | PF07002  |
| MSTRG. 22822. 3 | 740   | coding    | PF07002  |

|                  |      |           |         |
|------------------|------|-----------|---------|
| MSTRG. 22825. 1  | 3094 | coding    | PF10187 |
| MSTRG. 22825. 7  | 1739 | coding    | PF10187 |
| MSTRG. 22825. 5  | 1632 | coding    | PF10187 |
| MSTRG. 22825. 6  | 1531 | coding    | PF10187 |
| MSTRG. 22827. 1  | 1971 | noncoding | –       |
| MSTRG. 22829. 3  | 1652 | coding    | PF11527 |
| MSTRG. 22829. 4  | 2093 | coding    | PF11527 |
| MSTRG. 22829. 2  | 4336 | coding    | PF11527 |
| MSTRG. 22824. 1  | 3760 | coding    | PF00048 |
| MSTRG. 22832. 5  | 1318 | coding    | PF05093 |
| MSTRG. 22832. 6  | 2243 | coding    | PF05093 |
| MSTRG. 22832. 4  | 1998 | coding    | PF05093 |
| MSTRG. 22833. 2  | 2074 | coding    | PF08511 |
| MSTRG. 22833. 3  | 1572 | coding    | PF08511 |
| MSTRG. 22841. 2  | 2909 | coding    | PF13925 |
| MSTRG. 22841. 3  | 5537 | coding    | PF13925 |
| MSTRG. 22842. 8  | 3683 | coding    | PF00225 |
| MSTRG. 22842. 9  | 3564 | coding    | PF00225 |
| MSTRG. 22842. 10 | 3621 | coding    | PF00225 |
| MSTRG. 22842. 12 | 3591 | coding    | PF00225 |
| MSTRG. 22842. 13 | 3555 | coding    | PF00225 |
| MSTRG. 22835. 1  | 3887 | coding    | PF00027 |
| MSTRG. 22835. 2  | 3234 | coding    | PF00027 |
| MSTRG. 22836. 1  | 2432 | noncoding | –       |
| MSTRG. 22838. 4  | 849  | noncoding | –       |
| MSTRG. 22838. 5  | 832  | noncoding | –       |
| MSTRG. 22838. 3  | 1124 | noncoding | –       |
| MSTRG. 22838. 2  | 1225 | noncoding | –       |
| MSTRG. 22845. 2  | 5496 | noncoding | –       |
| MSTRG. 22847. 3  | 1633 | noncoding | –       |
| MSTRG. 22857. 1  | 2219 | coding    | PF04054 |
| MSTRG. 22857. 2  | 2029 | noncoding | –       |
| MSTRG. 22858. 3  | 7688 | coding    | PF04054 |
| MSTRG. 22858. 5  | 7797 | coding    | PF04054 |
| MSTRG. 22858. 6  | 7791 | coding    | PF04054 |
| MSTRG. 22858. 7  | 7794 | coding    | PF04054 |
| MSTRG. 22858. 8  | 7727 | coding    | PF04054 |
| MSTRG. 22858. 10 | 7897 | coding    | PF04054 |
| MSTRG. 22858. 4  | 7724 | coding    | PF04054 |
| MSTRG. 22858. 9  | 7883 | coding    | PF04054 |
| MSTRG. 22867. 1  | 3852 | coding    | PF01049 |
| MSTRG. 22871. 1  | 1344 | noncoding | –       |
| MSTRG. 22871. 2  | 744  | noncoding | –       |
| MSTRG. 22881. 2  | 3571 | coding    | PF01049 |
| MSTRG. 22881. 3  | 2628 | coding    | PF00028 |
| MSTRG. 22892. 2  | 2611 | coding    | PF01712 |
| MSTRG. 22892. 4  | 2551 | coding    | PF01712 |
| MSTRG. 22892. 5  | 870  | noncoding | –       |
| MSTRG. 22893. 1  | 453  | noncoding | –       |
| MSTRG. 22895. 2  | 863  | noncoding | –       |
| MSTRG. 22896. 1  | 4217 | noncoding | –       |
| MSTRG. 22896. 4  | 2800 | noncoding | –       |
| MSTRG. 22898. 2  | 2131 | noncoding | –       |
| MSTRG. 22899. 1  | 1451 | coding    | PF00194 |

|                 |      |           |         |
|-----------------|------|-----------|---------|
| MSTRG. 22909. 2 | 1281 | noncoding | –       |
| MSTRG. 22911. 3 | 2095 | noncoding | –       |
| MSTRG. 22912. 1 | 2392 | noncoding | –       |
| MSTRG. 22913. 2 | 2030 | coding    | PF06046 |
| MSTRG. 22914. 3 | 1951 | coding    | PF02319 |
| MSTRG. 22919. 1 | 4509 | noncoding | –       |
| MSTRG. 22921. 1 | 405  | noncoding | –       |
| MSTRG. 22922. 1 | 3623 | noncoding | –       |
| MSTRG. 22922. 3 | 3609 | noncoding | –       |
| MSTRG. 22924. 1 | 2071 | coding    | PF01529 |
| MSTRG. 22922. 6 | 1776 | noncoding | –       |
| MSTRG. 22924. 3 | 5981 | noncoding | –       |
| MSTRG. 22924. 2 | 1566 | coding    | PF01529 |
| MSTRG. 22928. 2 | 4662 | coding    | PF15903 |
| MSTRG. 22931. 5 | 4633 | noncoding | –       |
| MSTRG. 22931. 6 | 4135 | noncoding | –       |
| MSTRG. 22933. 1 | 2563 | coding    | PF10341 |
| MSTRG. 22935. 1 | 1199 | noncoding | –       |
| MSTRG. 22936. 1 | 2193 | coding    | PF15762 |
| MSTRG. 22937. 2 | 2344 | noncoding | –       |
| MSTRG. 22937. 3 | 2485 | noncoding | –       |
| MSTRG. 22941. 4 | 2468 | coding    | PF15739 |
| MSTRG. 22943. 1 | 1652 | coding    | PF05485 |
| MSTRG. 22944. 2 | 1028 | coding    | PF02136 |
| MSTRG. 22925. 3 | 4696 | coding    | PF16529 |
| MSTRG. 22946. 1 | 1315 | coding    | PF00227 |
| MSTRG. 22946. 4 | 1029 | coding    | PF00227 |
| MSTRG. 22947. 2 | 1149 | coding    | PF02450 |
| MSTRG. 22948. 3 | 5229 | noncoding | –       |
| MSTRG. 22948. 4 | 5167 | noncoding | –       |
| MSTRG. 22948. 2 | 4379 | noncoding | –       |
| MSTRG. 22948. 5 | 4333 | noncoding | –       |
| MSTRG. 22951. 1 | 2854 | coding    | PF01207 |
| MSTRG. 22951. 2 | 2329 | coding    | PF01207 |
| MSTRG. 22953. 1 | 5027 | noncoding | –       |
| MSTRG. 22953. 2 | 4577 | noncoding | –       |
| MSTRG. 22953. 8 | 4303 | noncoding | –       |
| MSTRG. 22953. 4 | 5634 | noncoding | –       |
| MSTRG. 22953. 5 | 4164 | noncoding | –       |
| MSTRG. 22953. 6 | 5738 | noncoding | –       |
| MSTRG. 22953. 7 | 4496 | noncoding | –       |
| MSTRG. 22953. 3 | 3978 | noncoding | –       |
| MSTRG. 22954. 1 | 2633 | noncoding | –       |
| MSTRG. 22955. 1 | 206  | noncoding | –       |
| MSTRG. 22965. 3 | 1795 | coding    | PF01352 |
| MSTRG. 22965. 5 | 1361 | coding    | PF01359 |
| MSTRG. 22965. 4 | 3586 | coding    | PF01352 |
| MSTRG. 22965. 6 | 3693 | coding    | PF01352 |
| MSTRG. 22965. 8 | 2424 | coding    | PF01359 |
| MSTRG. 22976. 4 | 2661 | noncoding | –       |
| MSTRG. 22977. 2 | 2600 | noncoding | –       |
| MSTRG. 22979. 2 | 8403 | coding    | PF00595 |
| MSTRG. 22979. 3 | 8366 | coding    | PF00595 |
| MSTRG. 22983. 2 | 2134 | coding    | PF04124 |

|                  |       |           |         |
|------------------|-------|-----------|---------|
| MSTRG. 22984. 5  | 1216  | noncoding | —       |
| MSTRG. 22984. 1  | 2952  | noncoding | —       |
| MSTRG. 22984. 3  | 2437  | noncoding | —       |
| MSTRG. 22984. 4  | 1985  | noncoding | —       |
| MSTRG. 22985. 2  | 1345  | noncoding | —       |
| MSTRG. 22986. 3  | 3101  | noncoding | —       |
| MSTRG. 22986. 4  | 2409  | noncoding | —       |
| MSTRG. 22986. 5  | 5029  | coding    | PF16772 |
| MSTRG. 22966. 6  | 5003  | coding    | PF16179 |
| MSTRG. 22966. 2  | 12573 | coding    | PF16179 |
| MSTRG. 22966. 3  | 12627 | coding    | PF16179 |
| MSTRG. 22966. 4  | 12756 | coding    | PF16179 |
| MSTRG. 22966. 5  | 8773  | noncoding | —       |
| MSTRG. 22967. 1  | 2020  | noncoding | —       |
| MSTRG. 22968. 1  | 6882  | noncoding | —       |
| MSTRG. 22967. 2  | 4548  | noncoding | —       |
| MSTRG. 22966. 7  | 17554 | coding    | PF16179 |
| MSTRG. 22966. 8  | 12354 | coding    | PF16179 |
| MSTRG. 22966. 9  | 4935  | coding    | PF16179 |
| MSTRG. 22966. 10 | 15585 | coding    | PF16179 |
| MSTRG. 22972. 1  | 2208  | coding    | PF08772 |
| MSTRG. 23003. 1  | 263   | noncoding | —       |
| MSTRG. 23003. 2  | 481   | noncoding | —       |
| MSTRG. 23003. 3  | 544   | noncoding | —       |
| MSTRG. 23015. 1  | 16415 | coding    | PF00046 |
| MSTRG. 23015. 2  | 16088 | coding    | PF00046 |
| MSTRG. 23016. 1  | 2120  | noncoding | —       |
| MSTRG. 23015. 3  | 15709 | coding    | PF00046 |
| MSTRG. 23017. 1  | 6471  | noncoding | —       |
| MSTRG. 23018. 1  | 4647  | noncoding | —       |
| MSTRG. 23006. 1  | 462   | noncoding | —       |
| MSTRG. 23007. 1  | 3959  | noncoding | —       |
| MSTRG. 23007. 3  | 3757  | noncoding | —       |
| MSTRG. 23009. 1  | 2242  | coding    | PF02966 |
| MSTRG. 23009. 2  | 2278  | coding    | PF02966 |
| MSTRG. 23009. 3  | 2221  | coding    | PF02966 |
| MSTRG. 23049. 1  | 468   | coding    | PF08016 |
| MSTRG. 23050. 1  | 1238  | noncoding | —       |
| MSTRG. 23048. 5  | 2198  | coding    | PF03398 |
| MSTRG. 23048. 4  | 2335  | coding    | PF03398 |
| MSTRG. 23048. 6  | 2346  | coding    | PF03398 |
| MSTRG. 23052. 2  | 3211  | coding    | PF08517 |
| MSTRG. 23055. 1  | 3858  | coding    | PF01602 |
| MSTRG. 23055. 5  | 4124  | coding    | PF01602 |
| MSTRG. 23054. 3  | 3536  | coding    | PF00481 |
| MSTRG. 23057. 1  | 753   | noncoding | —       |
| MSTRG. 23058. 1  | 1327  | noncoding | —       |
| MSTRG. 23061. 1  | 8759  | coding    | PF01352 |
| MSTRG. 23061. 2  | 1253  | noncoding | —       |
| MSTRG. 23071. 1  | 2310  | noncoding | —       |
| MSTRG. 23080. 2  | 16432 | noncoding | —       |
| MSTRG. 23080. 1  | 1751  | noncoding | —       |
| MSTRG. 23082. 1  | 15613 | noncoding | —       |
| MSTRG. 23082. 2  | 1736  | noncoding | —       |

|                 |       |           |         |
|-----------------|-------|-----------|---------|
| MSTRG. 23082. 3 | 15368 | noncoding | —       |
| MSTRG. 23082. 4 | 15297 | noncoding | —       |
| MSTRG. 23084. 1 | 646   | noncoding | —       |
| MSTRG. 23072. 2 | 1049  | coding    | PF01868 |
| MSTRG. 23074. 1 | 2329  | noncoding | —       |
| MSTRG. 23074. 2 | 2234  | noncoding | —       |
| MSTRG. 23075. 1 | 5174  | noncoding | —       |
| MSTRG. 23076. 1 | 1567  | noncoding | —       |
| MSTRG. 23087. 3 | 13173 | coding    | PF16606 |
| MSTRG. 23079. 2 | 5101  | noncoding | —       |
| MSTRG. 23089. 2 | 699   | noncoding | —       |
| MSTRG. 23089. 1 | 788   | noncoding | —       |
| MSTRG. 23094. 2 | 6199  | coding    | PF10034 |
| MSTRG. 23094. 4 | 9437  | noncoding | —       |
| MSTRG. 23094. 5 | 5150  | coding    | PF10034 |
| MSTRG. 23094. 6 | 8386  | coding    | PF10034 |
| MSTRG. 23101. 1 | 6485  | noncoding | —       |
| MSTRG. 23101. 2 | 6396  | noncoding | —       |
| MSTRG. 23106. 3 | 2753  | noncoding | —       |
| MSTRG. 23106. 4 | 2840  | noncoding | —       |
| MSTRG. 23106. 5 | 2476  | noncoding | —       |
| MSTRG. 23108. 1 | 3292  | coding    | PF03097 |
| MSTRG. 23105. 2 | 3726  | noncoding | —       |
| MSTRG. 23110. 2 | 1963  | coding    | PF00557 |
| MSTRG. 23110. 3 | 2313  | coding    | PF00557 |
| MSTRG. 23122. 1 | 2531  | coding    | PF00342 |
| MSTRG. 23122. 2 | 2335  | coding    | PF00342 |
| MSTRG. 23122. 3 | 2306  | coding    | PF00342 |
| MSTRG. 23127. 1 | 1808  | noncoding | —       |
| MSTRG. 23127. 2 | 9165  | noncoding | —       |
| MSTRG. 23128. 1 | 593   | noncoding | —       |
| MSTRG. 23130. 1 | 1536  | coding    | PF09252 |
| MSTRG. 23134. 1 | 5258  | coding    | PF02093 |
| MSTRG. 23139. 2 | 2505  | coding    | PF01352 |
| MSTRG. 23139. 4 | 832   | coding    | PF01352 |
| MSTRG. 23139. 5 | 850   | coding    | PF01352 |
| MSTRG. 23139. 6 | 539   | coding    | PF01352 |
| MSTRG. 23139. 7 | 726   | coding    | PF01352 |
| MSTRG. 23142. 2 | 5569  | noncoding | —       |
| MSTRG. 23142. 1 | 5364  | noncoding | —       |
| MSTRG. 23145. 1 | 5297  | noncoding | —       |
| MSTRG. 23145. 2 | 4683  | noncoding | —       |
| MSTRG. 23146. 1 | 2085  | noncoding | —       |
| MSTRG. 23153. 2 | 2741  | coding    | PF16016 |
| MSTRG. 23153. 3 | 2675  | coding    | PF16016 |
| MSTRG. 23150. 2 | 1645  | noncoding | —       |
| MSTRG. 23151. 1 | 843   | noncoding | —       |
| MSTRG. 23154. 1 | 796   | coding    | PF02038 |
| MSTRG. 23159. 3 | 1341  | noncoding | —       |
| MSTRG. 23160. 1 | 2058  | noncoding | —       |
| MSTRG. 23158. 1 | 626   | noncoding | —       |
| MSTRG. 23158. 2 | 536   | noncoding | —       |
| MSTRG. 23166. 1 | 503   | noncoding | —       |
| MSTRG. 23169. 1 | 1174  | noncoding | —       |

|                 |       |           |         |
|-----------------|-------|-----------|---------|
| MSTRG. 23173. 1 | 350   | noncoding | —       |
| MSTRG. 23175. 1 | 765   | noncoding | —       |
| MSTRG. 23175. 2 | 663   | noncoding | —       |
| MSTRG. 23174. 1 | 383   | noncoding | —       |
| MSTRG. 23178. 1 | 1510  | coding    | PF00178 |
| MSTRG. 23182. 1 | 1505  | noncoding | —       |
| MSTRG. 23187. 1 | 1366  | noncoding | —       |
| MSTRG. 23188. 1 | 1783  | noncoding | —       |
| MSTRG. 23188. 2 | 6252  | noncoding | —       |
| MSTRG. 23188. 4 | 6180  | noncoding | —       |
| MSTRG. 23188. 3 | 1371  | noncoding | —       |
| MSTRG. 23189. 2 | 10301 | coding    | PF00856 |
| MSTRG. 23191. 3 | 902   | noncoding | —       |
| MSTRG. 23191. 4 | 1187  | noncoding | —       |
| MSTRG. 23191. 2 | 1218  | noncoding | —       |
| MSTRG. 23192. 4 | 507   | coding    | PF10251 |
| MSTRG. 23186. 2 | 3319  | noncoding | —       |
| MSTRG. 23194. 1 | 4284  | coding    | PF00620 |
| MSTRG. 23194. 2 | 4287  | coding    | PF00620 |
| MSTRG. 23195. 3 | 2075  | noncoding | —       |
| MSTRG. 23195. 4 | 2231  | noncoding | —       |
| MSTRG. 23195. 2 | 1813  | noncoding | —       |
| MSTRG. 23195. 1 | 2286  | noncoding | —       |
| MSTRG. 23196. 1 | 1571  | noncoding | —       |
| MSTRG. 23193. 1 | 2408  | coding    | PF12925 |
| MSTRG. 23197. 2 | 643   | noncoding | —       |
| MSTRG. 23202. 1 | 976   | noncoding | —       |
| MSTRG. 23204. 3 | 4980  | noncoding | —       |
| MSTRG. 23201. 2 | 860   | coding    | PF14560 |
| MSTRG. 23207. 1 | 2004  | noncoding | —       |
| MSTRG. 23207. 4 | 1273  | noncoding | —       |
| MSTRG. 23212. 1 | 1018  | coding    | PF01352 |
| MSTRG. 23213. 1 | 1960  | noncoding | —       |
| MSTRG. 23221. 3 | 2426  | coding    | PF01352 |
| MSTRG. 23221. 2 | 6786  | coding    | PF01352 |
| MSTRG. 23222. 1 | 551   | noncoding | —       |
| MSTRG. 23223. 1 | 3927  | coding    | PF01352 |
| MSTRG. 23223. 2 | 2521  | noncoding | —       |
| MSTRG. 23223. 3 | 3804  | coding    | PF01352 |
| MSTRG. 23223. 4 | 3116  | noncoding | —       |
| MSTRG. 23224. 1 | 1216  | noncoding | —       |
| MSTRG. 23234. 1 | 1322  | noncoding | —       |
| MSTRG. 23237. 1 | 8447  | coding    | PF01352 |
| MSTRG. 23237. 3 | 7903  | coding    | PF01352 |
| MSTRG. 23239. 1 | 1810  | noncoding | —       |
| MSTRG. 23241. 1 | 5886  | noncoding | —       |
| MSTRG. 23253. 1 | 4975  | noncoding | —       |
| MSTRG. 23255. 2 | 8311  | coding    | PF02145 |
| MSTRG. 23255. 4 | 9080  | coding    | PF02145 |
| MSTRG. 23255. 5 | 7961  | coding    | PF02145 |
| MSTRG. 23255. 6 | 4746  | coding    | PF02145 |
| MSTRG. 23257. 1 | 2827  | noncoding | —       |
| MSTRG. 23255. 7 | 4247  | coding    | PF11881 |
| MSTRG. 23255. 8 | 2768  | coding    | PF11881 |

|                  |       |           |         |
|------------------|-------|-----------|---------|
| MSTRG. 23265. 1  | 3280  | coding    | PF15064 |
| MSTRG. 23265. 2  | 3016  | coding    | PF15064 |
| MSTRG. 23265. 3  | 1662  | coding    | PF15064 |
| MSTRG. 23265. 12 | 3072  | coding    | PF15064 |
| MSTRG. 23265. 11 | 3468  | coding    | PF15064 |
| MSTRG. 23265. 13 | 3362  | coding    | PF15064 |
| MSTRG. 23265. 7  | 3323  | coding    | PF15064 |
| MSTRG. 23265. 15 | 3766  | coding    | PF15064 |
| MSTRG. 23262. 1  | 4633  | coding    | PF05210 |
| MSTRG. 23264. 1  | 2250  | coding    | PF00130 |
| MSTRG. 23258. 1  | 256   | coding    | PF01365 |
| MSTRG. 23259. 1  | 831   | noncoding | –       |
| MSTRG. 23268. 1  | 1174  | coding    | PF10075 |
| MSTRG. 23272. 1  | 5169  | noncoding | –       |
| MSTRG. 23272. 2  | 4883  | noncoding | –       |
| MSTRG. 23272. 3  | 10160 | coding    | PF00435 |
| MSTRG. 23272. 4  | 7282  | coding    | PF00435 |
| MSTRG. 23272. 5  | 1921  | noncoding | –       |
| MSTRG. 23271. 3  | 1247  | coding    | PF08726 |
| MSTRG. 23273. 3  | 2159  | coding    | PF13893 |
| MSTRG. 23275. 3  | 1727  | coding    | PF02146 |
| MSTRG. 23280. 2  | 1741  | noncoding | –       |
| MSTRG. 23284. 2  | 1579  | coding    | PF04300 |
| MSTRG. 23285. 3  | 1971  | coding    | PF00069 |
| MSTRG. 23285. 4  | 2607  | coding    | PF00069 |
| MSTRG. 23285. 5  | 3630  | coding    | PF00069 |
| MSTRG. 23285. 6  | 3111  | coding    | PF00069 |
| MSTRG. 23285. 8  | 5032  | coding    | PF00069 |
| MSTRG. 23279. 1  | 1140  | coding    | PF04300 |
| MSTRG. 23291. 2  | 640   | coding    | PF00241 |
| MSTRG. 23291. 3  | 523   | coding    | PF00241 |
| MSTRG. 23292. 3  | 3798  | noncoding | –       |
| MSTRG. 23292. 4  | 3816  | noncoding | –       |
| MSTRG. 23292. 5  | 8665  | noncoding | –       |
| MSTRG. 23292. 6  | 3623  | noncoding | –       |
| MSTRG. 23292. 8  | 9177  | noncoding | –       |
| MSTRG. 23292. 9  | 7281  | noncoding | –       |
| MSTRG. 23292. 10 | 6531  | noncoding | –       |
| MSTRG. 23297. 4  | 3478  | coding    | PF03439 |
| MSTRG. 23297. 3  | 3424  | coding    | PF03439 |
| MSTRG. 23295. 1  | 2328  | noncoding | –       |
| MSTRG. 23296. 2  | 1721  | noncoding | –       |
| MSTRG. 23296. 3  | 1805  | noncoding | –       |
| MSTRG. 23301. 1  | 918   | coding    | PF00337 |
| MSTRG. 23307. 1  | 7455  | coding    | PF00069 |
| MSTRG. 23307. 2  | 4195  | coding    | PF00069 |
| MSTRG. 23307. 3  | 6266  | coding    | PF00069 |
| MSTRG. 23307. 7  | 2318  | coding    | PF00069 |
| MSTRG. 23318. 4  | 2173  | coding    | PF13918 |
| MSTRG. 23318. 6  | 2156  | coding    | PF13918 |
| MSTRG. 23318. 7  | 2503  | coding    | PF13918 |
| MSTRG. 23318. 8  | 2072  | coding    | PF13918 |
| MSTRG. 23318. 9  | 2050  | coding    | PF13918 |
| MSTRG. 23321. 3  | 713   | noncoding | –       |

|                  |       |           |         |
|------------------|-------|-----------|---------|
| MSTRG. 23321. 2  | 707   | noncoding | -       |
| MSTRG. 23322. 1  | 1524  | coding    | PF15410 |
| MSTRG. 23322. 4  | 1344  | noncoding | -       |
| MSTRG. 23322. 5  | 1089  | noncoding | -       |
| MSTRG. 23322. 3  | 1533  | coding    | PF15410 |
| MSTRG. 23323. 3  | 2238  | coding    | PF02214 |
| MSTRG. 23314. 1  | 4974  | noncoding | -       |
| MSTRG. 23324. 2  | 3179  | coding    | PF06311 |
| MSTRG. 23325. 1  | 2660  | coding    | PF03109 |
| MSTRG. 23332. 2  | 4163  | noncoding | -       |
| MSTRG. 23333. 1  | 1268  | coding    | PF00071 |
| MSTRG. 23333. 3  | 1815  | coding    | PF00071 |
| MSTRG. 23327. 1  | 3525  | noncoding | -       |
| MSTRG. 23327. 2  | 5287  | noncoding | -       |
| MSTRG. 23327. 3  | 2485  | noncoding | -       |
| MSTRG. 23327. 4  | 3975  | noncoding | -       |
| MSTRG. 23339. 3  | 3792  | coding    | PF07714 |
| MSTRG. 23347. 2  | 9289  | coding    | PF00431 |
| MSTRG. 23347. 3  | 10219 | coding    | PF00431 |
| MSTRG. 23348. 2  | 1555  | coding    | PF15455 |
| MSTRG. 23348. 1  | 1959  | coding    | PF15455 |
| MSTRG. 23349. 1  | 1012  | noncoding | -       |
| MSTRG. 23349. 2  | 818   | noncoding | -       |
| MSTRG. 23349. 3  | 838   | noncoding | -       |
| MSTRG. 23349. 4  | 929   | noncoding | -       |
| MSTRG. 23349. 5  | 881   | noncoding | -       |
| MSTRG. 23350. 1  | 5521  | coding    | PF00505 |
| MSTRG. 23350. 4  | 8957  | coding    | PF16090 |
| MSTRG. 23355. 2  | 3226  | coding    | PF00178 |
| MSTRG. 23357. 1  | 4044  | coding    | PF00069 |
| MSTRG. 23360. 1  | 2635  | noncoding | -       |
| MSTRG. 23360. 2  | 2347  | noncoding | -       |
| MSTRG. 23360. 3  | 2488  | noncoding | -       |
| MSTRG. 23361. 1  | 968   | noncoding | -       |
| MSTRG. 23352. 3  | 3526  | noncoding | -       |
| MSTRG. 23352. 4  | 3381  | noncoding | -       |
| MSTRG. 23352. 5  | 3379  | noncoding | -       |
| MSTRG. 23365. 2  | 1325  | coding    | PF01090 |
| MSTRG. 23369. 1  | 1215  | coding    | PF00021 |
| MSTRG. 23369. 9  | 1520  | coding    | PF00021 |
| MSTRG. 23369. 10 | 1224  | coding    | PF00021 |
| MSTRG. 23367. 1  | 342   | noncoding | -       |
| MSTRG. 23367. 3  | 1172  | noncoding | -       |
| MSTRG. 23370. 3  | 994   | noncoding | -       |
| MSTRG. 23373. 2  | 1101  | noncoding | -       |
| MSTRG. 23374. 3  | 2135  | coding    | PF01834 |
| MSTRG. 23377. 2  | 1271  | noncoding | -       |
| MSTRG. 23377. 3  | 1150  | noncoding | -       |
| MSTRG. 23379. 1  | 2313  | noncoding | -       |
| MSTRG. 23380. 1  | 2265  | noncoding | -       |
| MSTRG. 23379. 3  | 1021  | noncoding | -       |
| MSTRG. 23380. 2  | 2379  | noncoding | -       |
| MSTRG. 23380. 3  | 2532  | noncoding | -       |
| MSTRG. 23380. 4  | 2424  | noncoding | -       |



|                |      |           |         |
|----------------|------|-----------|---------|
| MSTRG. 23379.4 | 680  | noncoding | -       |
| MSTRG. 23380.5 | 2607 | noncoding | -       |
| MSTRG. 23380.6 | 2242 | noncoding | -       |
| MSTRG. 23380.7 | 3522 | noncoding | -       |
| MSTRG. 23380.8 | 2605 | noncoding | -       |
| MSTRG. 23382.4 | 1938 | coding    | PF05049 |
| MSTRG. 23384.2 | 2061 | coding    | PF05049 |
| MSTRG. 23387.2 | 2008 | coding    | PF01352 |
| MSTRG. 23388.2 | 998  | coding    | PF01352 |
| MSTRG. 23391.1 | 3904 | noncoding | -       |
| MSTRG. 23391.2 | 688  | noncoding | -       |
| MSTRG. 23391.4 | 4205 | coding    | PF01352 |
| MSTRG. 23392.1 | 3354 | coding    | PF01352 |
| MSTRG. 23396.1 | 480  | noncoding | -       |
| MSTRG. 23397.2 | 3201 | coding    | PF08205 |
| MSTRG. 23401.5 | 1531 | noncoding | -       |
| MSTRG. 23399.3 | 1340 | coding    | PF01442 |
| MSTRG. 23407.2 | 1698 | coding    | PF16181 |
| MSTRG. 23412.4 | 7096 | noncoding | -       |
| MSTRG. 23412.2 | 2792 | noncoding | -       |
| MSTRG. 23412.3 | 2864 | noncoding | -       |
| MSTRG. 23413.1 | 3482 | noncoding | -       |
| MSTRG. 23406.1 | 6753 | coding    | PF15753 |
| MSTRG. 23414.1 | 1550 | coding    | PF00106 |
| MSTRG. 23415.1 | 2504 | noncoding | -       |
| MSTRG. 23415.2 | 912  | noncoding | -       |
| MSTRG. 23415.3 | 6458 | noncoding | -       |
| MSTRG. 23415.5 | 2844 | noncoding | -       |
| MSTRG. 23415.4 | 3974 | noncoding | -       |
| MSTRG. 23416.1 | 5190 | coding    | PF00069 |
| MSTRG. 23416.2 | 3467 | coding    | PF00069 |
| MSTRG. 23420.1 | 3170 | noncoding | -       |
| MSTRG. 23430.2 | 2226 | noncoding | -       |
| MSTRG. 23433.1 | 3450 | noncoding | -       |
| MSTRG. 23433.2 | 2627 | noncoding | -       |
| MSTRG. 23435.1 | 2653 | coding    | PF16878 |
| MSTRG. 23443.5 | 3007 | coding    | PF12295 |
| MSTRG. 23443.6 | 3834 | coding    | PF12295 |
| MSTRG. 23443.7 | 2858 | coding    | PF12295 |
| MSTRG. 23438.3 | 856  | noncoding | -       |
| MSTRG. 23451.2 | 2372 | coding    | PF14893 |
| MSTRG. 23451.3 | 2345 | coding    | PF14893 |
| MSTRG. 23454.2 | 735  | noncoding | -       |
| MSTRG. 23455.1 | 1169 | noncoding | -       |
| MSTRG. 23456.1 | 4141 | coding    | PF00069 |
| MSTRG. 23461.2 | 4181 | coding    | PF04991 |
| MSTRG. 23462.1 | 2840 | coding    | PF00375 |
| MSTRG. 23457.2 | 818  | coding    | PF01217 |
| MSTRG. 23463.2 | 534  | noncoding | -       |
| MSTRG. 23467.2 | 6537 | noncoding | -       |
| MSTRG. 23467.3 | 5957 | noncoding | -       |
| MSTRG. 23467.5 | 5541 | noncoding | -       |
| MSTRG. 23467.4 | 4509 | noncoding | -       |
| MSTRG. 23466.3 | 1323 | coding    | PF15826 |

|                  |      |           |         |
|------------------|------|-----------|---------|
| MSTRG. 23470. 1  | 2985 | coding    | PF15266 |
| MSTRG. 23470. 2  | 2573 | coding    | PF15266 |
| MSTRG. 23474. 2  | 1663 | coding    | PF14938 |
| MSTRG. 23479. 8  | 4828 | noncoding | –       |
| MSTRG. 23479. 5  | 5354 | noncoding | –       |
| MSTRG. 23479. 7  | 5483 | noncoding | –       |
| MSTRG. 23479. 9  | 4203 | noncoding | –       |
| MSTRG. 23479. 3  | 4559 | noncoding | –       |
| MSTRG. 23479. 10 | 4705 | noncoding | –       |
| MSTRG. 23479. 11 | 4728 | noncoding | –       |
| MSTRG. 23482. 3  | 3504 | coding    | PF01068 |
| MSTRG. 23482. 4  | 3068 | coding    | PF01068 |
| MSTRG. 23484. 1  | 1465 | coding    | PF00822 |
| MSTRG. 23485. 2  | 2277 | noncoding | –       |
| MSTRG. 23486. 1  | 1576 | noncoding | –       |
| MSTRG. 23488. 2  | 1970 | coding    | PF00810 |
| MSTRG. 23488. 4  | 5971 | coding    | PF00810 |
| MSTRG. 23491. 2  | 856  | coding    | PF01007 |
| MSTRG. 23492. 2  | 1483 | coding    | PF01369 |
| MSTRG. 23492. 5  | 4212 | coding    | PF01369 |
| MSTRG. 23495. 1  | 1291 | noncoding | –       |
| MSTRG. 23505. 2  | 2305 | coding    | PF01843 |
| MSTRG. 23510. 2  | 2735 | noncoding | –       |
| MSTRG. 23515. 4  | 2195 | coding    | PF10488 |
| MSTRG. 23520. 1  | 1736 | coding    | PF00210 |
| MSTRG. 23520. 2  | 978  | coding    | PF00210 |
| MSTRG. 23520. 3  | 1102 | coding    | PF00210 |
| MSTRG. 23520. 4  | 1048 | coding    | PF00210 |
| MSTRG. 23513. 1  | 3961 | coding    | PF00007 |
| MSTRG. 23522. 5  | 4503 | coding    | PF00076 |
| MSTRG. 23522. 3  | 4161 | coding    | PF00076 |
| MSTRG. 23522. 4  | 4134 | coding    | PF00076 |
| MSTRG. 23525. 2  | 4355 | noncoding | –       |
| MSTRG. 23528. 2  | 8728 | noncoding | –       |
| MSTRG. 23529. 9  | 2561 | coding    | PF00209 |
| MSTRG. 23530. 1  | 1622 | coding    | PF01285 |
| MSTRG. 23531. 2  | 1450 | noncoding | –       |
| MSTRG. 23531. 1  | 1372 | noncoding | –       |
| MSTRG. 23530. 3  | 1914 | coding    | PF01285 |
| MSTRG. 23532. 1  | 360  | noncoding | –       |
| MSTRG. 23535. 3  | 2646 | coding    | PF14662 |
| MSTRG. 23535. 2  | 2670 | coding    | PF14662 |
| MSTRG. 23535. 4  | 2905 | coding    | PF14662 |
| MSTRG. 23535. 6  | 2486 | coding    | PF14662 |
| MSTRG. 23534. 2  | 1600 | noncoding | –       |
| MSTRG. 23545. 2  | 8758 | coding    | PF13926 |
| MSTRG. 23550. 1  | 4502 | noncoding | –       |
| MSTRG. 23550. 3  | 6394 | noncoding | –       |
| MSTRG. 23550. 4  | 4260 | noncoding | –       |
| MSTRG. 23551. 4  | 1607 | coding    | PF00605 |
| MSTRG. 23552. 4  | 675  | noncoding | –       |
| MSTRG. 23552. 5  | 2934 | noncoding | –       |
| MSTRG. 23552. 2  | 2127 | noncoding | –       |
| MSTRG. 23552. 3  | 3990 | noncoding | –       |

|                  |      |           |         |
|------------------|------|-----------|---------|
| MSTRG. 23553. 4  | 1698 | coding    | PF15358 |
| MSTRG. 23567. 3  | 3812 | coding    | PF01602 |
| MSTRG. 23568. 2  | 1857 | noncoding | —       |
| MSTRG. 23568. 3  | 1523 | noncoding | —       |
| MSTRG. 23572. 3  | 1444 | coding    | PF15798 |
| MSTRG. 23572. 4  | 1381 | coding    | PF15798 |
| MSTRG. 23574. 4  | 2879 | coding    | PF05064 |
| MSTRG. 23575. 2  | 1761 | noncoding | —       |
| MSTRG. 23559. 4  | 1830 | noncoding | —       |
| MSTRG. 23559. 5  | 1885 | noncoding | —       |
| MSTRG. 23560. 2  | 1656 | noncoding | —       |
| MSTRG. 23561. 1  | 3779 | coding    | PF15005 |
| MSTRG. 23561. 2  | 924  | coding    | PF15005 |
| MSTRG. 23556. 1  | 968  | coding    | PF00026 |
| MSTRG. 23558. 2  | 1847 | noncoding | —       |
| MSTRG. 23562. 1  | 897  | coding    | PF00178 |
| MSTRG. 23577. 2  | 3322 | coding    | PF15876 |
| MSTRG. 23579. 1  | 8440 | coding    | PF07647 |
| MSTRG. 23580. 1  | 1362 | noncoding | —       |
| MSTRG. 23582. 1  | 1110 | noncoding | —       |
| MSTRG. 23583. 2  | 1893 | noncoding | —       |
| MSTRG. 23585. 4  | 1074 | noncoding | —       |
| MSTRG. 23586. 1  | 2713 | noncoding | —       |
| MSTRG. 23586. 2  | 1803 | noncoding | —       |
| MSTRG. 23586. 3  | 3182 | noncoding | —       |
| MSTRG. 23585. 6  | 2193 | noncoding | —       |
| MSTRG. 23585. 7  | 1267 | noncoding | —       |
| MSTRG. 23585. 8  | 1323 | noncoding | —       |
| MSTRG. 23585. 9  | 1262 | noncoding | —       |
| MSTRG. 23585. 10 | 1296 | noncoding | —       |
| MSTRG. 23585. 11 | 1248 | noncoding | —       |
| MSTRG. 23587. 1  | 1469 | coding    | PF00089 |
| MSTRG. 23587. 2  | 1199 | coding    | PF00089 |
| MSTRG. 23592. 1  | 1111 | coding    | PF01352 |
| MSTRG. 23593. 1  | 2280 | noncoding | —       |
| MSTRG. 23594. 1  | 2273 | coding    | PF01352 |
| MSTRG. 23594. 2  | 1416 | coding    | PF01352 |
| MSTRG. 23594. 3  | 4671 | coding    | PF01352 |
| MSTRG. 23594. 4  | 1078 | coding    | PF01352 |
| MSTRG. 23595. 1  | 1744 | noncoding | —       |
| MSTRG. 23595. 2  | 1355 | noncoding | —       |
| MSTRG. 23595. 3  | 1866 | noncoding | —       |
| MSTRG. 23595. 4  | 1281 | noncoding | —       |
| MSTRG. 23594. 5  | 1203 | noncoding | —       |
| MSTRG. 23597. 2  | 2124 | noncoding | —       |
| MSTRG. 23597. 3  | 694  | coding    | PF13895 |
| MSTRG. 23598. 1  | 5851 | noncoding | —       |
| MSTRG. 23598. 2  | 4842 | noncoding | —       |
| MSTRG. 23598. 3  | 4352 | noncoding | —       |
| MSTRG. 23598. 4  | 1412 | coding    | PF01012 |
| MSTRG. 23603. 2  | 3267 | noncoding | —       |
| MSTRG. 23607. 2  | 378  | noncoding | —       |
| MSTRG. 23608. 2  | 883  | noncoding | —       |
| MSTRG. 23619. 1  | 1665 | coding    | PF01352 |

|                  |       |           |         |
|------------------|-------|-----------|---------|
| MSTRG. 23621. 5  | 993   | coding    | PF01352 |
| MSTRG. 23621. 4  | 2543  | coding    | PF01352 |
| MSTRG. 23621. 1  | 5210  | coding    | PF01352 |
| MSTRG. 23621. 6  | 5042  | coding    | PF01352 |
| MSTRG. 23621. 3  | 5920  | coding    | PF01352 |
| MSTRG. 23622. 1  | 1435  | coding    | PF00078 |
| MSTRG. 23621. 7  | 2544  | coding    | PF01352 |
| MSTRG. 23621. 9  | 4562  | coding    | PF01352 |
| MSTRG. 23621. 11 | 7535  | noncoding | —       |
| MSTRG. 23621. 17 | 6404  | noncoding | —       |
| MSTRG. 23621. 18 | 5953  | coding    | PF01352 |
| MSTRG. 23623. 1  | 462   | noncoding | —       |
| MSTRG. 23629. 1  | 2982  | noncoding | —       |
| MSTRG. 23630. 1  | 7160  | noncoding | —       |
| MSTRG. 23630. 2  | 2072  | noncoding | —       |
| MSTRG. 23630. 3  | 3009  | noncoding | —       |
| MSTRG. 23630. 4  | 6406  | coding    | PF03402 |
| MSTRG. 23631. 1  | 825   | noncoding | —       |
| MSTRG. 23616. 2  | 3150  | noncoding | —       |
| MSTRG. 23753. 1  | 1602  | noncoding | —       |
| MSTRG. 23754. 2  | 3214  | coding    | PF01352 |
| MSTRG. 23754. 1  | 2941  | coding    | PF01352 |
| MSTRG. 23754. 4  | 2482  | coding    | PF01352 |
| MSTRG. 23754. 3  | 3278  | coding    | PF01352 |
| MSTRG. 23754. 5  | 4031  | coding    | PF01352 |
| MSTRG. 23754. 7  | 2606  | coding    | PF01352 |
| MSTRG. 23754. 13 | 3231  | coding    | PF01352 |
| MSTRG. 23754. 14 | 4775  | coding    | PF01352 |
| MSTRG. 23754. 16 | 3340  | coding    | PF01352 |
| MSTRG. 23758. 1  | 766   | noncoding | —       |
| MSTRG. 23763. 1  | 3712  | noncoding | —       |
| MSTRG. 23769. 5  | 6828  | coding    | PF01352 |
| MSTRG. 23769. 6  | 10400 | coding    | PF01352 |
| MSTRG. 23769. 8  | 5510  | coding    | PF01352 |
| MSTRG. 23770. 2  | 5235  | coding    | PF01352 |
| MSTRG. 23770. 1  | 5822  | coding    | PF01352 |
| MSTRG. 23770. 3  | 6189  | coding    | PF01352 |
| MSTRG. 23770. 4  | 11573 | coding    | PF01352 |
| MSTRG. 23770. 5  | 8144  | coding    | PF01352 |
| MSTRG. 23770. 6  | 5329  | coding    | PF01352 |
| MSTRG. 23770. 7  | 7434  | coding    | PF01352 |
| MSTRG. 23770. 8  | 4176  | coding    | PF01352 |
| MSTRG. 23770. 10 | 5925  | coding    | PF01352 |
| MSTRG. 23770. 9  | 5811  | coding    | PF01352 |
| MSTRG. 23773. 2  | 3946  | coding    | PF01352 |
| MSTRG. 23769. 11 | 2058  | coding    | PF01352 |
| MSTRG. 23765. 13 | 1143  | noncoding | —       |
| MSTRG. 23765. 15 | 1098  | noncoding | —       |
| MSTRG. 23765. 10 | 1108  | noncoding | —       |
| MSTRG. 23765. 12 | 1156  | noncoding | —       |
| MSTRG. 23765. 9  | 1096  | noncoding | —       |
| MSTRG. 23765. 8  | 1841  | noncoding | —       |
| MSTRG. 23765. 11 | 2262  | noncoding | —       |
| MSTRG. 23765. 14 | 2224  | noncoding | —       |

|                  |      |           |         |
|------------------|------|-----------|---------|
| MSTRG. 23765. 4  | 2292 | noncoding | -       |
| MSTRG. 23765. 7  | 2280 | noncoding | -       |
| MSTRG. 23765. 5  | 1616 | noncoding | -       |
| MSTRG. 23765. 6  | 2178 | noncoding | -       |
| MSTRG. 23770. 13 | 3048 | coding    | PF01352 |
| MSTRG. 23774. 1  | 3839 | coding    | PF01352 |
| MSTRG. 23770. 14 | 3408 | noncoding | -       |
| MSTRG. 23775. 1  | 650  | noncoding | -       |
| MSTRG. 23776. 1  | 1413 | noncoding | -       |
| MSTRG. 23777. 1  | 8755 | coding    | PF01352 |
| MSTRG. 23777. 2  | 6548 | coding    | PF01352 |
| MSTRG. 23777. 3  | 7064 | coding    | PF01352 |
| MSTRG. 23778. 1  | 1267 | noncoding | -       |
| MSTRG. 23778. 2  | 6428 | noncoding | -       |
| MSTRG. 23779. 1  | 4267 | coding    | PF01352 |
| MSTRG. 23779. 2  | 3763 | coding    | PF01352 |
| MSTRG. 23779. 3  | 3679 | coding    | PF01352 |
| MSTRG. 23783. 1  | 391  | noncoding | -       |
| MSTRG. 23785. 1  | 590  | noncoding | -       |
| MSTRG. 23786. 1  | 338  | noncoding | -       |
| MSTRG. 23788. 2  | 5322 | coding    | PF01352 |
| MSTRG. 23788. 3  | 2905 | coding    | PF01352 |
| MSTRG. 23788. 4  | 2372 | coding    | PF01352 |
| MSTRG. 23788. 5  | 5579 | coding    | PF01352 |
| MSTRG. 23788. 7  | 2296 | coding    | PF01352 |
| MSTRG. 23788. 6  | 4154 | coding    | PF01352 |
| MSTRG. 23788. 8  | 716  | coding    | PF01352 |
| MSTRG. 23788. 9  | 422  | coding    | PF01352 |
| MSTRG. 23789. 1  | 2276 | noncoding | -       |
| MSTRG. 23790. 1  | 1379 | coding    | PF01352 |
| MSTRG. 23790. 2  | 2431 | noncoding | -       |
| MSTRG. 23789. 2  | 4324 | coding    | PF00517 |
| MSTRG. 23789. 3  | 1283 | coding    | PF01352 |
| MSTRG. 23791. 1  | 7788 | coding    | PF01352 |
| MSTRG. 23791. 3  | 4066 | coding    | PF01352 |
| MSTRG. 23791. 5  | 7723 | coding    | PF01352 |
| MSTRG. 23791. 6  | 7569 | coding    | PF01352 |
| MSTRG. 23791. 4  | 7655 | coding    | PF01352 |
| MSTRG. 23791. 7  | 4979 | coding    | PF01352 |
| MSTRG. 23791. 8  | 7757 | coding    | PF01352 |
| MSTRG. 23791. 9  | 7520 | coding    | PF01352 |
| MSTRG. 23791. 11 | 7850 | coding    | PF01352 |
| MSTRG. 23791. 10 | 7659 | coding    | PF01352 |
| MSTRG. 23632. 1  | 6217 | coding    | PF01352 |
| MSTRG. 23632. 3  | 6274 | coding    | PF01352 |
| MSTRG. 23632. 4  | 2608 | coding    | PF01352 |
| MSTRG. 23632. 5  | 2680 | coding    | PF01352 |
| MSTRG. 23632. 6  | 2773 | coding    | PF01352 |
| MSTRG. 23632. 7  | 2045 | coding    | PF01352 |
| MSTRG. 23632. 8  | 2071 | coding    | PF01352 |
| MSTRG. 23632. 9  | 3464 | noncoding | -       |
| MSTRG. 23632. 10 | 2352 | coding    | PF01352 |
| MSTRG. 23632. 11 | 3510 | coding    | PF01352 |
| MSTRG. 23635. 2  | 3009 | coding    | PF01352 |

|                 |      |           |         |
|-----------------|------|-----------|---------|
| MSTRG. 23635. 3 | 2945 | coding    | PF01352 |
| MSTRG. 23639. 1 | 5932 | coding    | PF01352 |
| MSTRG. 23651. 1 | 1470 | coding    | PF01352 |
| MSTRG. 23652. 1 | 275  | noncoding | –       |
| MSTRG. 23653. 1 | 616  | noncoding | –       |
| MSTRG. 23654. 1 | 4824 | coding    | PF01352 |
| MSTRG. 23659. 1 | 1411 | noncoding | –       |
| MSTRG. 23651. 2 | 814  | noncoding | –       |
| MSTRG. 23660. 1 | 1259 | noncoding | –       |
| MSTRG. 23651. 3 | 613  | noncoding | –       |
| MSTRG. 23651. 4 | 8200 | coding    | PF01352 |
| MSTRG. 23651. 5 | 1602 | noncoding | –       |
| MSTRG. 23663. 1 | 695  | noncoding | –       |
| MSTRG. 23664. 1 | 994  | noncoding | –       |
| MSTRG. 23651. 6 | 1878 | coding    | PF01352 |
| MSTRG. 23651. 7 | 7710 | coding    | PF01352 |
| MSTRG. 23651. 8 | 466  | noncoding | –       |
| MSTRG. 23666. 1 | 628  | noncoding | –       |
| MSTRG. 23667. 1 | 984  | noncoding | –       |
| MSTRG. 23668. 1 | 616  | noncoding | –       |
| MSTRG. 23670. 1 | 4309 | coding    | PF01352 |
| MSTRG. 23670. 2 | 3774 | coding    | PF01352 |
| MSTRG. 23670. 3 | 3704 | coding    | PF01352 |
| MSTRG. 23671. 1 | 257  | noncoding | –       |
| MSTRG. 23644. 2 | 659  | noncoding | –       |
| MSTRG. 23644. 1 | 352  | noncoding | –       |
| MSTRG. 23644. 3 | 895  | noncoding | –       |
| MSTRG. 23644. 4 | 874  | noncoding | –       |
| MSTRG. 23677. 1 | 3020 | coding    | PF01417 |
| MSTRG. 23677. 2 | 5778 | coding    | PF01417 |
| MSTRG. 23678. 6 | 1740 | coding    | PF00076 |
| MSTRG. 23681. 4 | 1710 | coding    | PF15794 |
| MSTRG. 23681. 5 | 1707 | coding    | PF15794 |
| MSTRG. 23681. 6 | 1941 | coding    | PF15794 |
| MSTRG. 23683. 1 | 4642 | noncoding | –       |
| MSTRG. 23683. 2 | 1525 | noncoding | –       |
| MSTRG. 23683. 3 | 1352 | noncoding | –       |
| MSTRG. 23690. 1 | 1153 | noncoding | –       |
| MSTRG. 23694. 7 | 2162 | noncoding | –       |
| MSTRG. 23694. 5 | 3236 | noncoding | –       |
| MSTRG. 23694. 6 | 2311 | noncoding | –       |
| MSTRG. 23694. 4 | 3499 | noncoding | –       |
| MSTRG. 23696. 1 | 6456 | coding    | PF13908 |
| MSTRG. 23696. 3 | 6104 | coding    | PF13908 |
| MSTRG. 23687. 1 | 1012 | coding    | PF15431 |
| MSTRG. 23688. 1 | 1848 | noncoding | –       |
| MSTRG. 23698. 3 | 3165 | coding    | PF12480 |
| MSTRG. 23701. 3 | 1743 | noncoding | –       |
| MSTRG. 23706. 1 | 4027 | coding    | PF04499 |
| MSTRG. 23706. 3 | 4938 | coding    | PF04499 |
| MSTRG. 23706. 2 | 3960 | coding    | PF04499 |
| MSTRG. 23699. 1 | 1721 | noncoding | –       |
| MSTRG. 23709. 3 | 3285 | coding    | PF14740 |
| MSTRG. 23709. 4 | 1986 | coding    | PF14740 |

|                 |       |           |         |
|-----------------|-------|-----------|---------|
| MSTRG. 23709. 5 | 1822  | coding    | PF14740 |
| MSTRG. 23709. 6 | 1162  | coding    | PF00992 |
| MSTRG. 23709. 7 | 1327  | coding    | PF00992 |
| MSTRG. 23712. 1 | 1433  | noncoding | –       |
| MSTRG. 23711. 2 | 1029  | noncoding | –       |
| MSTRG. 23716. 1 | 2960  | coding    | PF12796 |
| MSTRG. 23716. 2 | 2957  | coding    | PF12796 |
| MSTRG. 23716. 6 | 9252  | coding    | PF12796 |
| MSTRG. 23716. 7 | 12010 | coding    | PF12796 |
| MSTRG. 23717. 2 | 1725  | noncoding | –       |
| MSTRG. 23717. 3 | 946   | noncoding | –       |
| MSTRG. 23718. 2 | 1595  | coding    | PF04906 |
| MSTRG. 23720. 4 | 5505  | coding    | PF03399 |
| MSTRG. 23720. 5 | 5134  | coding    | PF03399 |
| MSTRG. 23727. 3 | 1663  | noncoding | –       |
| MSTRG. 23728. 1 | 530   | coding    | PF07810 |
| MSTRG. 23728. 2 | 896   | coding    | PF07810 |
| MSTRG. 23731. 2 | 2582  | coding    | PF04065 |
| MSTRG. 23732. 2 | 2285  | coding    | PF01798 |
| MSTRG. 23732. 3 | 2195  | coding    | PF01798 |
| MSTRG. 23736. 1 | 1385  | noncoding | –       |
| MSTRG. 23743. 2 | 1493  | coding    | PF02023 |
| MSTRG. 23744. 2 | 2140  | coding    | PF02023 |
| MSTRG. 23744. 3 | 2010  | coding    | PF02023 |
| MSTRG. 23797. 2 | 9161  | coding    | PF01352 |
| MSTRG. 23801. 4 | 2066  | coding    | PF01352 |
| MSTRG. 23801. 3 | 967   | coding    | PF01352 |
| MSTRG. 23801. 5 | 1717  | coding    | PF01352 |
| MSTRG. 23809. 2 | 2990  | coding    | PF01352 |
| MSTRG. 23794. 1 | 2464  | coding    | PF02023 |
| MSTRG. 23794. 3 | 4535  | coding    | PF02023 |
| MSTRG. 23814. 1 | 1533  | coding    | PF02023 |
| MSTRG. 23817. 2 | 4566  | noncoding | –       |
| MSTRG. 23841. 3 | 1469  | noncoding | –       |
| MSTRG. 23841. 2 | 4953  | coding    | PF01352 |
| MSTRG. 23846. 1 | 6794  | noncoding | –       |
| MSTRG. 23846. 2 | 12041 | noncoding | –       |
| MSTRG. 23846. 3 | 11996 | noncoding | –       |
| MSTRG. 23847. 1 | 2656  | coding    | PF01352 |
| MSTRG. 23849. 1 | 1832  | noncoding | –       |
| MSTRG. 23855. 2 | 2402  | noncoding | –       |
| MSTRG. 23857. 1 | 2007  | noncoding | –       |
| MSTRG. 23857. 2 | 3050  | noncoding | –       |
| MSTRG. 23855. 3 | 3073  | coding    | PF01352 |
| MSTRG. 23855. 4 | 5963  | coding    | PF01352 |
| MSTRG. 23860. 1 | 7580  | coding    | PF01352 |
| MSTRG. 23860. 2 | 1471  | coding    | PF01352 |
| MSTRG. 23857. 3 | 1412  | noncoding | –       |
| MSTRG. 23855. 9 | 3621  | coding    | PF01352 |
| MSTRG. 23824. 1 | 642   | noncoding | –       |
| MSTRG. 23825. 1 | 10404 | coding    | PF01352 |
| MSTRG. 23825. 3 | 2746  | coding    | PF01352 |
| MSTRG. 23825. 4 | 3196  | noncoding | –       |
| MSTRG. 23825. 5 | 8372  | noncoding | –       |

|                  |       |           |         |
|------------------|-------|-----------|---------|
| MSTRG. 23827. 1  | 8839  | coding    | PF03402 |
| MSTRG. 23828. 1  | 841   | noncoding | –       |
| MSTRG. 23833. 1  | 3881  | noncoding | –       |
| MSTRG. 23834. 1  | 3344  | noncoding | –       |
| MSTRG. 23834. 2  | 3231  | coding    | PF01352 |
| MSTRG. 23834. 3  | 5858  | coding    | PF01352 |
| MSTRG. 23834. 4  | 5403  | coding    | PF01352 |
| MSTRG. 23834. 5  | 6553  | noncoding | –       |
| MSTRG. 23868. 2  | 4800  | coding    | PF01352 |
| MSTRG. 23868. 4  | 4795  | coding    | PF01352 |
| MSTRG. 23872. 6  | 10966 | coding    | PF01352 |
| MSTRG. 23872. 7  | 3819  | coding    | PF01352 |
| MSTRG. 23872. 3  | 4059  | coding    | PF01352 |
| MSTRG. 23872. 1  | 4240  | coding    | PF01352 |
| MSTRG. 23873. 1  | 1697  | noncoding | –       |
| MSTRG. 23872. 8  | 4604  | noncoding | –       |
| MSTRG. 23872. 9  | 1252  | coding    | PF01352 |
| MSTRG. 23875. 1  | 1336  | noncoding | –       |
| MSTRG. 23872. 10 | 5678  | coding    | PF01352 |
| MSTRG. 23877. 6  | 9051  | coding    | PF01352 |
| MSTRG. 23878. 2  | 7808  | noncoding | –       |
| MSTRG. 23879. 2  | 2650  | coding    | PF01352 |
| MSTRG. 23879. 3  | 2738  | coding    | PF01352 |
| MSTRG. 23879. 4  | 3751  | coding    | PF01352 |
| MSTRG. 23880. 1  | 10158 | coding    | PF01352 |
| MSTRG. 23880. 3  | 2810  | coding    | PF01352 |
| MSTRG. 23881. 3  | 3036  | noncoding | –       |
| MSTRG. 23881. 5  | 3299  | noncoding | –       |
| MSTRG. 23883. 1  | 549   | noncoding | –       |
| MSTRG. 23840. 2  | 891   | coding    | PF00177 |
| MSTRG. 23890. 1  | 3732  | noncoding | –       |
| MSTRG. 23894. 3  | 2228  | coding    | PF03184 |
| MSTRG. 23898. 2  | 2763  | coding    | PF02023 |
| MSTRG. 23927. 1  | 1217  | noncoding | –       |
| MSTRG. 23929. 1  | 372   | noncoding | –       |
| MSTRG. 23931. 3  | 2644  | coding    | PF00790 |
| MSTRG. 23933. 2  | 1095  | coding    | PF04442 |
| MSTRG. 23944. 2  | 885   | noncoding | –       |
| MSTRG. 23946. 1  | 385   | noncoding | –       |
| MSTRG. 23947. 1  | 3059  | noncoding | –       |
| MSTRG. 23947. 2  | 11349 | noncoding | –       |
| MSTRG. 23949. 1  | 6992  | noncoding | –       |
| MSTRG. 23949. 2  | 5610  | noncoding | –       |
| MSTRG. 23950. 1  | 630   | noncoding | –       |
| MSTRG. 23950. 2  | 1975  | noncoding | –       |
| MSTRG. 23952. 2  | 2607  | coding    | PF15862 |
| MSTRG. 23952. 3  | 2979  | coding    | PF15862 |
| MSTRG. 23952. 5  | 1650  | noncoding | –       |
| MSTRG. 23952. 4  | 1602  | coding    | PF15862 |
| MSTRG. 23954. 3  | 4033  | noncoding | –       |
| MSTRG. 23954. 5  | 7173  | noncoding | –       |
| MSTRG. 23962. 5  | 2357  | coding    | PF00076 |
| MSTRG. 23962. 8  | 23170 | noncoding | –       |
| MSTRG. 23962. 4  | 9174  | coding    | PF00076 |



|                  |       |           |         |
|------------------|-------|-----------|---------|
| MSTRG. 23962. 6  | 2413  | coding    | PF00076 |
| MSTRG. 23962. 1  | 11572 | coding    | PF00076 |
| MSTRG. 23962. 3  | 5889  | coding    | PF00076 |
| MSTRG. 23963. 1  | 14072 | noncoding | —       |
| MSTRG. 23964. 1  | 8499  | noncoding | —       |
| MSTRG. 23962. 11 | 9497  | noncoding | —       |
| MSTRG. 23962. 12 | 5551  | noncoding | —       |
| MSTRG. 23965. 1  | 17817 | noncoding | —       |
| MSTRG. 23966. 1  | 2803  | noncoding | —       |
| MSTRG. 23962. 13 | 21803 | noncoding | —       |
| MSTRG. 23967. 1  | 7279  | noncoding | —       |
| MSTRG. 23968. 1  | 18607 | noncoding | —       |
| MSTRG. 23958. 1  | 1005  | noncoding | —       |
| MSTRG. 23970. 2  | 1319  | coding    | PF01221 |
| MSTRG. 23976. 1  | 1988  | coding    | PF07162 |
| MSTRG. 23977. 1  | 1602  | coding    | PF03098 |
| MSTRG. 23981. 3  | 5736  | coding    | PF06602 |
| MSTRG. 23981. 4  | 2693  | coding    | PF00447 |
| MSTRG. 23981. 5  | 2597  | noncoding | —       |
| MSTRG. 23981. 6  | 5735  | coding    | PF06602 |
| MSTRG. 23981. 7  | 6147  | coding    | PF06602 |
| MSTRG. 23981. 8  | 8219  | coding    | PF06602 |
| MSTRG. 23983. 4  | 3240  | coding    | PF00735 |
| MSTRG. 23983. 3  | 3519  | coding    | PF15548 |
| MSTRG. 23998. 5  | 4665  | noncoding | —       |
| MSTRG. 23998. 6  | 4896  | noncoding | —       |
| MSTRG. 23998. 7  | 4767  | noncoding | —       |
| MSTRG. 23999. 11 | 2041  | noncoding | —       |
| MSTRG. 24000. 2  | 775   | coding    | PF10172 |
| MSTRG. 24004. 1  | 1019  | noncoding | —       |
| MSTRG. 23986. 1  | 1003  | noncoding | —       |
| MSTRG. 23986. 2  | 498   | noncoding | —       |
| MSTRG. 23987. 2  | 2905  | noncoding | —       |
| MSTRG. 23988. 1  | 4176  | noncoding | —       |
| MSTRG. 23988. 2  | 13815 | noncoding | —       |
| MSTRG. 23989. 1  | 3918  | noncoding | —       |
| MSTRG. 23988. 3  | 5680  | noncoding | —       |
| MSTRG. 23988. 4  | 11152 | noncoding | —       |
| MSTRG. 23990. 1  | 3808  | noncoding | —       |
| MSTRG. 23990. 2  | 7354  | noncoding | —       |
| MSTRG. 23990. 3  | 9006  | noncoding | —       |
| MSTRG. 23991. 1  | 6206  | noncoding | —       |
| MSTRG. 23992. 1  | 1559  | noncoding | —       |
| MSTRG. 23984. 1  | 3352  | noncoding | —       |
| MSTRG. 23995. 1  | 3919  | coding    | PF10220 |
| MSTRG. 23995. 4  | 2296  | noncoding | —       |
| MSTRG. 23996. 4  | 764   | noncoding | —       |
| MSTRG. 23997. 1  | 1196  | noncoding | —       |
| MSTRG. 24007. 1  | 1015  | noncoding | —       |
| MSTRG. 24020. 1  | 6384  | coding    | PF13838 |
| MSTRG. 24020. 3  | 1718  | coding    | PF01981 |
| MSTRG. 24020. 4  | 1586  | coding    | PF01981 |
| MSTRG. 24023. 1  | 1156  | noncoding | —       |
| MSTRG. 24022. 3  | 3388  | noncoding | —       |

|                  |       |           |         |
|------------------|-------|-----------|---------|
| MSTRG. 24026. 3  | 5238  | coding    | PF00069 |
| MSTRG. 24026. 1  | 1633  | coding    | PF00069 |
| MSTRG. 24026. 4  | 1284  | coding    | PF00069 |
| MSTRG. 24027. 1  | 2879  | noncoding | —       |
| MSTRG. 24011. 2  | 5687  | coding    | PF14750 |
| MSTRG. 24013. 3  | 3883  | noncoding | —       |
| MSTRG. 24013. 5  | 3782  | noncoding | —       |
| MSTRG. 24014. 1  | 230   | noncoding | —       |
| MSTRG. 24015. 1  | 6974  | noncoding | —       |
| MSTRG. 24016. 2  | 10263 | noncoding | —       |
| MSTRG. 24017. 3  | 2321  | coding    | PF00481 |
| MSTRG. 24019. 1  | 6849  | noncoding | —       |
| MSTRG. 24019. 2  | 1145  | noncoding | —       |
| MSTRG. 24031. 2  | 757   | noncoding | —       |
| MSTRG. 24035. 1  | 6824  | coding    | PF00443 |
| MSTRG. 24035. 3  | 675   | noncoding | —       |
| MSTRG. 24036. 1  | 2215  | noncoding | —       |
| MSTRG. 24037. 1  | 1004  | noncoding | —       |
| MSTRG. 24049. 1  | 3001  | noncoding | —       |
| MSTRG. 24049. 2  | 3019  | noncoding | —       |
| MSTRG. 24049. 8  | 3211  | noncoding | —       |
| MSTRG. 24049. 9  | 2916  | noncoding | —       |
| MSTRG. 24049. 10 | 2876  | noncoding | —       |
| MSTRG. 24049. 12 | 5192  | noncoding | —       |
| MSTRG. 24050. 2  | 1367  | noncoding | —       |
| MSTRG. 24050. 3  | 1570  | noncoding | —       |
| MSTRG. 24051. 1  | 1062  | noncoding | —       |
| MSTRG. 24041. 2  | 2404  | coding    | PF08164 |
| MSTRG. 24057. 3  | 2033  | noncoding | —       |
| MSTRG. 24057. 4  | 2660  | noncoding | —       |
| MSTRG. 24058. 1  | 1958  | noncoding | —       |
| MSTRG. 24058. 2  | 471   | noncoding | —       |
| MSTRG. 24062. 1  | 6577  | noncoding | —       |
| MSTRG. 24062. 5  | 4491  | noncoding | —       |
| MSTRG. 24062. 6  | 4488  | noncoding | —       |
| MSTRG. 24062. 8  | 4904  | noncoding | —       |
| MSTRG. 24062. 9  | 4789  | noncoding | —       |
| MSTRG. 24059. 1  | 2434  | noncoding | —       |
| MSTRG. 24059. 3  | 1918  | noncoding | —       |
| MSTRG. 24059. 4  | 1822  | noncoding | —       |
| MSTRG. 24063. 1  | 2051  | coding    | PF04812 |
| MSTRG. 24063. 2  | 2054  | coding    | PF04812 |
| MSTRG. 24063. 3  | 1976  | coding    | PF04812 |
| MSTRG. 24063. 6  | 2022  | coding    | PF04812 |
| MSTRG. 24071. 2  | 645   | coding    | PF00048 |
| MSTRG. 24071. 1  | 1028  | coding    | PF00048 |
| MSTRG. 24081. 1  | 3311  | noncoding | —       |
| MSTRG. 24081. 2  | 3311  | noncoding | —       |
| MSTRG. 24081. 9  | 2029  | noncoding | —       |
| MSTRG. 24081. 5  | 2070  | noncoding | —       |
| MSTRG. 24081. 7  | 2611  | noncoding | —       |
| MSTRG. 24081. 10 | 2021  | noncoding | —       |
| MSTRG. 24075. 2  | 1090  | noncoding | —       |
| MSTRG. 24082. 1  | 5438  | coding    | PF01602 |

|                  |       |           |         |
|------------------|-------|-----------|---------|
| MSTRG. 24082. 4  | 3317  | coding    | PF01602 |
| MSTRG. 24082. 3  | 3941  | coding    | PF01602 |
| MSTRG. 24086. 1  | 3185  | noncoding | —       |
| MSTRG. 24093. 3  | 4143  | noncoding | —       |
| MSTRG. 24095. 3  | 4588  | coding    | PF01068 |
| MSTRG. 24095. 2  | 4275  | coding    | PF01068 |
| MSTRG. 24098. 3  | 1855  | coding    | PF00118 |
| MSTRG. 24098. 4  | 1501  | coding    | PF00118 |
| MSTRG. 24099. 1  | 867   | noncoding | —       |
| MSTRG. 24102. 1  | 881   | noncoding | —       |
| MSTRG. 24104. 1  | 1590  | noncoding | —       |
| MSTRG. 24105. 1  | 1049  | noncoding | —       |
| MSTRG. 24105. 2  | 532   | noncoding | —       |
| MSTRG. 24107. 1  | 1110  | noncoding | —       |
| MSTRG. 24108. 1  | 278   | noncoding | —       |
| MSTRG. 24111. 2  | 5173  | noncoding | —       |
| MSTRG. 24112. 1  | 1533  | noncoding | —       |
| MSTRG. 24113. 3  | 1253  | noncoding | —       |
| MSTRG. 24114. 2  | 3298  | coding    | PF06017 |
| MSTRG. 24115. 1  | 2511  | coding    | PF03261 |
| MSTRG. 24115. 3  | 1225  | coding    | PF03261 |
| MSTRG. 24117. 2  | 2835  | coding    | PF01399 |
| MSTRG. 24117. 3  | 2967  | coding    | PF01399 |
| MSTRG. 24125. 1  | 1231  | noncoding | —       |
| MSTRG. 24125. 2  | 347   | noncoding | —       |
| MSTRG. 24123. 1  | 2327  | noncoding | —       |
| MSTRG. 24127. 1  | 5831  | coding    | PF01412 |
| MSTRG. 24134. 2  | 1487  | noncoding | —       |
| MSTRG. 24135. 4  | 3663  | coding    | PF09733 |
| MSTRG. 24135. 2  | 3207  | coding    | PF09733 |
| MSTRG. 24135. 6  | 2485  | coding    | PF09733 |
| MSTRG. 24136. 8  | 1744  | coding    | PF15340 |
| MSTRG. 24136. 9  | 982   | coding    | PF15340 |
| MSTRG. 24139. 1  | 1321  | noncoding | —       |
| MSTRG. 24140. 1  | 811   | noncoding | —       |
| MSTRG. 24147. 2  | 7718  | noncoding | —       |
| MSTRG. 24173. 1  | 12993 | coding    | PF00616 |
| MSTRG. 24173. 3  | 9716  | noncoding | —       |
| MSTRG. 24173. 4  | 12315 | coding    | PF00616 |
| MSTRG. 24173. 2  | 12572 | noncoding | —       |
| MSTRG. 24173. 6  | 12023 | coding    | PF00616 |
| MSTRG. 24173. 7  | 9660  | noncoding | —       |
| MSTRG. 24173. 5  | 9846  | noncoding | —       |
| MSTRG. 24173. 10 | 11525 | noncoding | —       |
| MSTRG. 24173. 8  | 12586 | noncoding | —       |
| MSTRG. 24173. 9  | 9774  | coding    | PF00616 |
| MSTRG. 24173. 13 | 12042 | noncoding | —       |
| MSTRG. 24173. 14 | 11534 | coding    | PF00616 |
| MSTRG. 24173. 11 | 12108 | coding    | PF00616 |
| MSTRG. 24173. 12 | 12168 | noncoding | —       |
| MSTRG. 24173. 15 | 12135 | noncoding | —       |
| MSTRG. 24173. 16 | 9369  | coding    | PF00616 |
| MSTRG. 24173. 17 | 8785  | coding    | PF00616 |
| MSTRG. 24175. 1  | 763   | noncoding | —       |

|                  |       |           |         |
|------------------|-------|-----------|---------|
| MSTRG. 24148. 2  | 2711  | noncoding | -       |
| MSTRG. 24152. 1  | 1155  | noncoding | -       |
| MSTRG. 24162. 1  | 1183  | noncoding | -       |
| MSTRG. 24163. 1  | 4900  | noncoding | -       |
| MSTRG. 24164. 1  | 1064  | noncoding | -       |
| MSTRG. 24163. 2  | 3222  | coding    | PF00069 |
| MSTRG. 24163. 4  | 15155 | noncoding | -       |
| MSTRG. 24163. 5  | 1476  | noncoding | -       |
| MSTRG. 24163. 6  | 2223  | noncoding | -       |
| MSTRG. 24158. 1  | 2160  | coding    | PF02214 |
| MSTRG. 24153. 1  | 900   | noncoding | -       |
| MSTRG. 24168. 1  | 874   | coding    | PF00274 |
| MSTRG. 24171. 1  | 1898  | noncoding | -       |
| MSTRG. 24172. 1  | 11485 | coding    | PF00069 |
| MSTRG. 24172. 2  | 6808  | coding    | PF10351 |
| MSTRG. 24184. 1  | 1301  | noncoding | -       |
| MSTRG. 24184. 3  | 938   | noncoding | -       |
| MSTRG. 24184. 4  | 778   | noncoding | -       |
| MSTRG. 24185. 3  | 2908  | coding    | PF14633 |
| MSTRG. 24187. 1  | 1982  | coding    | PF00071 |
| MSTRG. 24187. 2  | 1556  | coding    | PF00071 |
| MSTRG. 24187. 3  | 1555  | coding    | PF00071 |
| MSTRG. 24187. 4  | 1589  | coding    | PF00071 |
| MSTRG. 24187. 5  | 1350  | coding    | PF00071 |
| MSTRG. 24183. 1  | 497   | noncoding | -       |
| MSTRG. 24190. 6  | 6681  | noncoding | -       |
| MSTRG. 24195. 1  | 497   | noncoding | -       |
| MSTRG. 24197. 1  | 3126  | noncoding | -       |
| MSTRG. 24198. 1  | 12138 | coding    | PF00069 |
| MSTRG. 24198. 2  | 9187  | coding    | PF00069 |
| MSTRG. 24201. 3  | 3323  | coding    | PF11904 |
| MSTRG. 24204. 4  | 2528  | coding    | PF08953 |
| MSTRG. 24209. 1  | 5332  | noncoding | -       |
| MSTRG. 24209. 3  | 5011  | noncoding | -       |
| MSTRG. 24209. 4  | 4532  | noncoding | -       |
| MSTRG. 24211. 2  | 5590  | coding    | PF09745 |
| MSTRG. 24211. 3  | 6853  | noncoding | -       |
| MSTRG. 24212. 1  | 2211  | noncoding | -       |
| MSTRG. 24207. 5  | 2783  | noncoding | -       |
| MSTRG. 24207. 4  | 3975  | noncoding | -       |
| MSTRG. 24215. 1  | 2081  | noncoding | -       |
| MSTRG. 24214. 3  | 4974  | coding    | PF00620 |
| MSTRG. 24214. 4  | 4606  | coding    | PF00620 |
| MSTRG. 24216. 1  | 2303  | coding    | PF02466 |
| MSTRG. 24222. 1  | 1101  | noncoding | -       |
| MSTRG. 24223. 1  | 4498  | noncoding | -       |
| MSTRG. 24224. 1  | 5024  | coding    | PF00588 |
| MSTRG. 24225. 2  | 3607  | noncoding | -       |
| MSTRG. 24228. 5  | 1958  | noncoding | -       |
| MSTRG. 24228. 6  | 1887  | noncoding | -       |
| MSTRG. 24228. 7  | 566   | noncoding | -       |
| MSTRG. 24229. 7  | 3441  | coding    | PF04100 |
| MSTRG. 24229. 10 | 2573  | noncoding | -       |
| MSTRG. 24218. 3  | 977   | noncoding | -       |

|                 |       |           |         |
|-----------------|-------|-----------|---------|
| MSTRG. 24230. 2 | 1731  | coding    | PF00244 |
| MSTRG. 24232. 3 | 9934  | coding    | PF07653 |
| MSTRG. 24233. 3 | 4145  | coding    | PF00063 |
| MSTRG. 24236. 3 | 2182  | noncoding | —       |
| MSTRG. 24252. 5 | 4853  | coding    | PF13638 |
| MSTRG. 24252. 6 | 5721  | noncoding | —       |
| MSTRG. 24252. 7 | 1148  | noncoding | —       |
| MSTRG. 24252. 8 | 6677  | coding    | PF10373 |
| MSTRG. 24252. 9 | 6407  | coding    | PF10373 |
| MSTRG. 24250. 1 | 4991  | noncoding | —       |
| MSTRG. 24250. 3 | 4125  | noncoding | —       |
| MSTRG. 24250. 5 | 4482  | noncoding | —       |
| MSTRG. 24250. 8 | 4562  | noncoding | —       |
| MSTRG. 24250. 4 | 4710  | noncoding | —       |
| MSTRG. 24250. 2 | 4814  | noncoding | —       |
| MSTRG. 24250. 7 | 4781  | noncoding | —       |
| MSTRG. 24257. 5 | 4079  | noncoding | —       |
| MSTRG. 24257. 4 | 5356  | coding    | PF00400 |
| MSTRG. 24257. 3 | 5634  | noncoding | —       |
| MSTRG. 24258. 5 | 5359  | coding    | PF13236 |
| MSTRG. 24258. 4 | 6847  | coding    | PF13236 |
| MSTRG. 24260. 1 | 737   | noncoding | —       |
| MSTRG. 24262. 1 | 386   | noncoding | —       |
| MSTRG. 24265. 2 | 1476  | noncoding | —       |
| MSTRG. 24265. 3 | 1401  | noncoding | —       |
| MSTRG. 24265. 5 | 1409  | noncoding | —       |
| MSTRG. 24265. 6 | 1261  | noncoding | —       |
| MSTRG. 24268. 2 | 1682  | noncoding | —       |
| MSTRG. 24269. 3 | 912   | noncoding | —       |
| MSTRG. 24269. 2 | 959   | noncoding | —       |
| MSTRG. 24273. 1 | 5113  | noncoding | —       |
| MSTRG. 24275. 2 | 3846  | coding    | PF00069 |
| MSTRG. 24276. 2 | 4376  | coding    | PF00122 |
| MSTRG. 24276. 3 | 3807  | coding    | PF00122 |
| MSTRG. 24285. 2 | 8166  | noncoding | —       |
| MSTRG. 24285. 3 | 8568  | noncoding | —       |
| MSTRG. 24286. 2 | 3504  | noncoding | —       |
| MSTRG. 24286. 3 | 5319  | noncoding | —       |
| MSTRG. 24288. 2 | 1414  | coding    | PF00179 |
| MSTRG. 24288. 3 | 8437  | noncoding | —       |
| MSTRG. 24288. 4 | 12506 | noncoding | —       |
| MSTRG. 24283. 3 | 806   | noncoding | —       |
| MSTRG. 24283. 5 | 3359  | noncoding | —       |
| MSTRG. 24283. 6 | 1930  | noncoding | —       |
| MSTRG. 24282. 2 | 865   | coding    | PF03148 |
| MSTRG. 24289. 3 | 1646  | coding    | PF00307 |
| MSTRG. 24289. 2 | 2562  | coding    | PF00307 |
| MSTRG. 24290. 3 | 1603  | noncoding | —       |
| MSTRG. 24291. 1 | 1242  | noncoding | —       |
| MSTRG. 24296. 1 | 3068  | noncoding | —       |
| MSTRG. 24297. 2 | 1142  | coding    | PF05669 |
| MSTRG. 24297. 1 | 4959  | coding    | PF15718 |
| MSTRG. 24297. 3 | 5045  | coding    | PF15718 |
| MSTRG. 24297. 6 | 4801  | coding    | PF15718 |

|                 |      |           |         |
|-----------------|------|-----------|---------|
| MSTRG. 24297. 9 | 7251 | coding    | PF15718 |
| MSTRG. 24295. 1 | 809  | noncoding | –       |
| MSTRG. 24302. 1 | 1210 | noncoding | –       |
| MSTRG. 24303. 1 | 5891 | coding    | PF07717 |
| MSTRG. 24313. 2 | 5874 | coding    | PF03528 |
| MSTRG. 24315. 1 | 5331 | noncoding | –       |
| MSTRG. 24314. 2 | 3762 | noncoding | –       |
| MSTRG. 24318. 1 | 5751 | coding    | PF03859 |
| MSTRG. 24318. 2 | 5679 | coding    | PF03859 |
| MSTRG. 24318. 3 | 5490 | coding    | PF03859 |
| MSTRG. 24318. 4 | 6554 | coding    | PF03859 |
| MSTRG. 24306. 2 | 2535 | coding    | PF00113 |
| MSTRG. 24306. 3 | 1796 | coding    | PF00113 |
| MSTRG. 24307. 1 | 621  | coding    | PF00235 |
| MSTRG. 24307. 2 | 1361 | coding    | PF00235 |
| MSTRG. 24307. 3 | 1115 | coding    | PF00235 |
| MSTRG. 24307. 4 | 719  | coding    | PF00235 |
| MSTRG. 24309. 1 | 1573 | noncoding | –       |
| MSTRG. 24305. 1 | 1498 | noncoding | –       |
| MSTRG. 24304. 4 | 846  | coding    | PF02932 |
| MSTRG. 24328. 2 | 4983 | coding    | PF08166 |
| MSTRG. 24328. 5 | 4502 | noncoding | –       |
| MSTRG. 24328. 7 | 6151 | noncoding | –       |
| MSTRG. 24328. 8 | 9078 | coding    | PF08166 |
| MSTRG. 24336. 3 | 647  | noncoding | –       |
| MSTRG. 24338. 6 | 2519 | coding    | PF00625 |
| MSTRG. 24339. 1 | 2143 | coding    | PF00441 |
| MSTRG. 24340. 1 | 955  | noncoding | –       |
| MSTRG. 24341. 3 | 2848 | coding    | PF00778 |
| MSTRG. 24344. 1 | 749  | noncoding | –       |
| MSTRG. 24346. 1 | 1167 | noncoding | –       |
| MSTRG. 24346. 6 | 1276 | noncoding | –       |
| MSTRG. 24346. 2 | 1237 | noncoding | –       |
| MSTRG. 24346. 3 | 1733 | noncoding | –       |
| MSTRG. 24346. 5 | 1853 | noncoding | –       |
| MSTRG. 24346. 4 | 1809 | noncoding | –       |
| MSTRG. 24346. 7 | 1802 | noncoding | –       |
| MSTRG. 24348. 3 | 1596 | coding    | PF01287 |
| MSTRG. 24350. 3 | 5157 | coding    | PF07177 |
| MSTRG. 24350. 4 | 6076 | coding    | PF07177 |
| MSTRG. 24350. 5 | 4777 | coding    | PF07177 |
| MSTRG. 24351. 7 | 2538 | coding    | PF04979 |
| MSTRG. 24351. 5 | 3022 | coding    | PF04979 |
| MSTRG. 24351. 4 | 3165 | coding    | PF04979 |
| MSTRG. 24351. 1 | 3218 | coding    | PF04979 |
| MSTRG. 24351. 3 | 4259 | coding    | PF01412 |
| MSTRG. 24351. 2 | 4694 | coding    | PF01412 |
| MSTRG. 24352. 1 | 2865 | coding    | PF02214 |
| MSTRG. 24356. 3 | 1087 | noncoding | –       |
| MSTRG. 24357. 1 | 2327 | coding    | PF15670 |
| MSTRG. 24357. 3 | 2580 | coding    | PF15670 |
| MSTRG. 24358. 5 | 3950 | noncoding | –       |
| MSTRG. 24364. 1 | 1663 | noncoding | –       |
| MSTRG. 24365. 4 | 6521 | coding    | PF04997 |

|                  |       |           |         |
|------------------|-------|-----------|---------|
| MSTRG. 24365. 8  | 6458  | coding    | PF04997 |
| MSTRG. 24365. 9  | 6353  | coding    | PF04997 |
| MSTRG. 24365. 10 | 6558  | coding    | PF04997 |
| MSTRG. 24365. 11 | 6485  | coding    | PF04997 |
| MSTRG. 24365. 6  | 6579  | coding    | PF04997 |
| MSTRG. 24365. 3  | 6575  | coding    | PF04997 |
| MSTRG. 24365. 5  | 6554  | coding    | PF04997 |
| MSTRG. 24365. 1  | 6388  | coding    | PF04997 |
| MSTRG. 24365. 12 | 6491  | coding    | PF04997 |
| MSTRG. 24365. 13 | 6519  | coding    | PF04997 |
| MSTRG. 24365. 14 | 6563  | coding    | PF04997 |
| MSTRG. 24366. 1  | 408   | noncoding | —       |
| MSTRG. 24367. 1  | 235   | noncoding | —       |
| MSTRG. 24374. 2  | 2439  | coding    | PF00270 |
| MSTRG. 24376. 1  | 1689  | noncoding | —       |
| MSTRG. 24376. 2  | 1308  | noncoding | —       |
| MSTRG. 24376. 5  | 1571  | noncoding | —       |
| MSTRG. 24376. 6  | 2394  | noncoding | —       |
| MSTRG. 24378. 4  | 4574  | noncoding | —       |
| MSTRG. 24378. 5  | 947   | noncoding | —       |
| MSTRG. 24379. 1  | 1887  | coding    | PF00054 |
| MSTRG. 24379. 2  | 1561  | coding    | PF00054 |
| MSTRG. 24380. 1  | 858   | noncoding | —       |
| MSTRG. 24359. 2  | 4222  | coding    | PF00287 |
| MSTRG. 24359. 3  | 4849  | coding    | PF00287 |
| MSTRG. 24361. 2  | 1779  | noncoding | —       |
| MSTRG. 24382. 5  | 7775  | coding    | PF02373 |
| MSTRG. 24387. 6  | 679   | noncoding | —       |
| MSTRG. 24387. 1  | 587   | noncoding | —       |
| MSTRG. 24387. 3  | 839   | noncoding | —       |
| MSTRG. 24387. 4  | 400   | noncoding | —       |
| MSTRG. 24389. 1  | 2813  | noncoding | —       |
| MSTRG. 24387. 7  | 5430  | noncoding | —       |
| MSTRG. 24390. 8  | 5982  | coding    | PF08074 |
| MSTRG. 24384. 3  | 4252  | coding    | PF12114 |
| MSTRG. 24384. 2  | 8170  | coding    | PF12114 |
| MSTRG. 24397. 1  | 2620  | noncoding | —       |
| MSTRG. 24398. 1  | 667   | coding    | PF04603 |
| MSTRG. 24397. 3  | 2533  | noncoding | —       |
| MSTRG. 24398. 4  | 706   | coding    | PF04603 |
| MSTRG. 24400. 1  | 11455 | noncoding | —       |
| MSTRG. 24405. 1  | 2712  | noncoding | —       |
| MSTRG. 24405. 3  | 2703  | noncoding | —       |
| MSTRG. 24405. 4  | 2824  | noncoding | —       |
| MSTRG. 24406. 3  | 758   | coding    | PF16906 |
| MSTRG. 24408. 1  | 1576  | noncoding | —       |
| MSTRG. 24408. 2  | 1067  | noncoding | —       |
| MSTRG. 24410. 3  | 6512  | coding    | PF04880 |
| MSTRG. 24412. 1  | 6272  | coding    | PF01576 |
| MSTRG. 24412. 2  | 7935  | coding    | PF01576 |
| MSTRG. 24413. 1  | 3676  | coding    | PF00063 |
| MSTRG. 24401. 1  | 3282  | noncoding | —       |
| MSTRG. 24404. 2  | 3862  | noncoding | —       |
| MSTRG. 24415. 7  | 913   | noncoding | —       |

|                  |       |           |         |
|------------------|-------|-----------|---------|
| MSTRG. 24415. 3  | 1065  | noncoding | –       |
| MSTRG. 24415. 5  | 1010  | noncoding | –       |
| MSTRG. 24415. 4  | 784   | noncoding | –       |
| MSTRG. 24415. 6  | 990   | noncoding | –       |
| MSTRG. 24415. 2  | 652   | noncoding | –       |
| MSTRG. 24417. 1  | 4684  | coding    | PF16623 |
| MSTRG. 24417. 6  | 9374  | coding    | PF16623 |
| MSTRG. 24417. 5  | 7965  | coding    | PF16623 |
| MSTRG. 24419. 1  | 3555  | noncoding | –       |
| MSTRG. 24419. 2  | 7764  | noncoding | –       |
| MSTRG. 24420. 1  | 1604  | noncoding | –       |
| MSTRG. 24421. 1  | 2958  | noncoding | –       |
| MSTRG. 24424. 2  | 4290  | coding    | PF02630 |
| MSTRG. 24436. 1  | 1401  | coding    | PF13908 |
| MSTRG. 24442. 2  | 13692 | coding    | PF03028 |
| MSTRG. 24443. 1  | 3685  | coding    | PF00069 |
| MSTRG. 24429. 7  | 538   | noncoding | –       |
| MSTRG. 24429. 5  | 1302  | noncoding | –       |
| MSTRG. 24429. 6  | 1120  | noncoding | –       |
| MSTRG. 24429. 1  | 970   | noncoding | –       |
| MSTRG. 24429. 2  | 1353  | noncoding | –       |
| MSTRG. 24429. 3  | 1335  | noncoding | –       |
| MSTRG. 24429. 4  | 1213  | noncoding | –       |
| MSTRG. 24429. 8  | 803   | noncoding | –       |
| MSTRG. 24454. 1  | 1674  | noncoding | –       |
| MSTRG. 24456. 2  | 1923  | coding    | PF00822 |
| MSTRG. 24458. 1  | 433   | noncoding | –       |
| MSTRG. 24460. 1  | 1922  | coding    | PF15213 |
| MSTRG. 24460. 2  | 1831  | coding    | PF15213 |
| MSTRG. 24460. 3  | 1630  | coding    | PF15213 |
| MSTRG. 24460. 4  | 1498  | coding    | PF15213 |
| MSTRG. 24460. 5  | 2830  | coding    | PF15213 |
| MSTRG. 24460. 6  | 3844  | coding    | PF15213 |
| MSTRG. 24461. 1  | 924   | noncoding | –       |
| MSTRG. 24462. 1  | 2509  | coding    | PF05832 |
| MSTRG. 24464. 3  | 3428  | noncoding | –       |
| MSTRG. 24464. 2  | 3257  | noncoding | –       |
| MSTRG. 24464. 1  | 4248  | noncoding | –       |
| MSTRG. 24465. 1  | 4219  | noncoding | –       |
| MSTRG. 24463. 1  | 6640  | coding    | PF01352 |
| MSTRG. 24468. 1  | 3121  | coding    | PF02023 |
| MSTRG. 24468. 2  | 5078  | coding    | PF02023 |
| MSTRG. 24484. 2  | 916   | coding    | PF00240 |
| MSTRG. 24484. 3  | 688   | coding    | PF00240 |
| MSTRG. 24484. 4  | 916   | coding    | PF00240 |
| MSTRG. 24484. 5  | 916   | coding    | PF00240 |
| MSTRG. 24484. 6  | 1253  | coding    | PF00240 |
| MSTRG. 24484. 7  | 916   | coding    | PF00240 |
| MSTRG. 24485. 3  | 919   | noncoding | –       |
| MSTRG. 24485. 2  | 887   | noncoding | –       |
| MSTRG. 24486. 1  | 839   | noncoding | –       |
| MSTRG. 24487. 10 | 8836  | noncoding | –       |
| MSTRG. 24487. 3  | 8706  | noncoding | –       |
| MSTRG. 24487. 4  | 8721  | noncoding | –       |



|                  |       |           |         |
|------------------|-------|-----------|---------|
| MSTRG. 24487. 5  | 8619  | noncoding | —       |
| MSTRG. 24487. 6  | 8598  | noncoding | —       |
| MSTRG. 24487. 7  | 8544  | noncoding | —       |
| MSTRG. 24487. 9  | 8682  | noncoding | —       |
| MSTRG. 24487. 8  | 10294 | noncoding | —       |
| MSTRG. 24487. 11 | 10576 | noncoding | —       |
| MSTRG. 24487. 17 | 8764  | noncoding | —       |
| MSTRG. 24487. 18 | 8767  | noncoding | —       |
| MSTRG. 24487. 19 | 8800  | noncoding | —       |
| MSTRG. 24488. 7  | 1930  | noncoding | —       |
| MSTRG. 24488. 10 | 2092  | noncoding | —       |
| MSTRG. 24488. 8  | 1215  | noncoding | —       |
| MSTRG. 24488. 14 | 1112  | noncoding | —       |
| MSTRG. 24489. 2  | 1493  | noncoding | —       |
| MSTRG. 24472. 3  | 6447  | coding    | PF00307 |
| MSTRG. 24472. 5  | 4397  | noncoding | —       |
| MSTRG. 24477. 1  | 3205  | coding    | PF00069 |
| MSTRG. 24477. 10 | 2684  | coding    | PF00069 |
| MSTRG. 24477. 8  | 2750  | coding    | PF00069 |
| MSTRG. 24477. 7  | 4183  | coding    | PF00069 |
| MSTRG. 24477. 9  | 4079  | coding    | PF00069 |
| MSTRG. 24478. 1  | 3018  | noncoding | —       |
| MSTRG. 24495. 3  | 2987  | coding    | PF00069 |
| MSTRG. 24510. 1  | 4751  | noncoding | —       |
| MSTRG. 24503. 1  | 1178  | noncoding | —       |
| MSTRG. 24504. 1  | 382   | noncoding | —       |
| MSTRG. 24514. 2  | 1344  | noncoding | —       |
| MSTRG. 24516. 2  | 410   | noncoding | —       |
| MSTRG. 24521. 6  | 3679  | noncoding | —       |
| MSTRG. 24523. 3  | 3893  | noncoding | —       |
| MSTRG. 24523. 4  | 8669  | noncoding | —       |
| MSTRG. 24520. 2  | 1025  | coding    | PF04191 |
| MSTRG. 24520. 3  | 921   | coding    | PF04191 |
| MSTRG. 24520. 4  | 1937  | coding    | PF04191 |
| MSTRG. 24520. 6  | 1153  | coding    | PF04191 |
| MSTRG. 24528. 4  | 1447  | noncoding | —       |
| MSTRG. 24528. 3  | 1215  | noncoding | —       |
| MSTRG. 24528. 2  | 2841  | noncoding | —       |
| MSTRG. 24528. 5  | 1285  | noncoding | —       |
| MSTRG. 24528. 6  | 952   | noncoding | —       |
| MSTRG. 24531. 2  | 4620  | coding    | PF13091 |
| MSTRG. 24539. 3  | 1604  | coding    | PF00106 |
| MSTRG. 24539. 4  | 7691  | coding    | PF00106 |
| MSTRG. 24541. 2  | 1054  | coding    | PF14972 |
| MSTRG. 24543. 1  | 1560  | noncoding | —       |
| MSTRG. 24548. 1  | 10378 | noncoding | —       |
| MSTRG. 24548. 3  | 5713  | noncoding | —       |
| MSTRG. 24554. 1  | 5364  | coding    | PF09744 |
| MSTRG. 24554. 4  | 4907  | coding    | PF09744 |
| MSTRG. 24554. 7  | 4584  | coding    | PF16471 |
| MSTRG. 24554. 9  | 4115  | coding    | PF16471 |
| MSTRG. 24555. 1  | 1097  | noncoding | —       |
| MSTRG. 24553. 1  | 3318  | coding    | PF00014 |
| MSTRG. 24557. 1  | 3393  | coding    | PF03194 |

|                  |       |           |         |
|------------------|-------|-----------|---------|
| MSTRG. 24557. 3  | 4314  | coding    | PF03194 |
| MSTRG. 24557. 4  | 2025  | coding    | PF03194 |
| MSTRG. 24557. 5  | 1586  | coding    | PF03194 |
| MSTRG. 24566. 2  | 2958  | coding    | PF14646 |
| MSTRG. 24566. 3  | 3258  | coding    | PF14646 |
| MSTRG. 24568. 2  | 2906  | noncoding | —       |
| MSTRG. 24571. 1  | 3908  | coding    | PF12529 |
| MSTRG. 24574. 4  | 915   | noncoding | —       |
| MSTRG. 24574. 5  | 525   | noncoding | —       |
| MSTRG. 24574. 3  | 469   | noncoding | —       |
| MSTRG. 24574. 2  | 446   | noncoding | —       |
| MSTRG. 24574. 6  | 944   | noncoding | —       |
| MSTRG. 24575. 1  | 821   | noncoding | —       |
| MSTRG. 24580. 2  | 1528  | noncoding | —       |
| MSTRG. 24584. 2  | 2921  | coding    | PF01853 |
| MSTRG. 24584. 3  | 3022  | coding    | PF01853 |
| MSTRG. 24585. 2  | 658   | coding    | PF15388 |
| MSTRG. 24586. 1  | 1154  | noncoding | —       |
| MSTRG. 24588. 3  | 1192  | noncoding | —       |
| MSTRG. 24589. 5  | 3608  | noncoding | —       |
| MSTRG. 24589. 6  | 3688  | noncoding | —       |
| MSTRG. 24589. 4  | 4507  | noncoding | —       |
| MSTRG. 24589. 7  | 9977  | noncoding | —       |
| MSTRG. 24591. 10 | 1434  | coding    | PF06888 |
| MSTRG. 24591. 3  | 1673  | coding    | PF06888 |
| MSTRG. 24591. 4  | 2017  | coding    | PF06888 |
| MSTRG. 24591. 5  | 2027  | coding    | PF06888 |
| MSTRG. 24591. 6  | 1905  | coding    | PF06888 |
| MSTRG. 24591. 7  | 2139  | coding    | PF06888 |
| MSTRG. 24591. 8  | 1555  | coding    | PF06888 |
| MSTRG. 24591. 9  | 1424  | coding    | PF06888 |
| MSTRG. 24594. 1  | 3895  | noncoding | —       |
| MSTRG. 24594. 2  | 2048  | noncoding | —       |
| MSTRG. 24595. 3  | 3162  | noncoding | —       |
| MSTRG. 24595. 4  | 2199  | noncoding | —       |
| MSTRG. 24597. 2  | 8805  | noncoding | —       |
| MSTRG. 24599. 3  | 3409  | coding    | PF07888 |
| MSTRG. 24599. 4  | 2336  | coding    | PF07888 |
| MSTRG. 24599. 5  | 3159  | coding    | PF07888 |
| MSTRG. 24604. 2  | 4105  | noncoding | —       |
| MSTRG. 24604. 1  | 10714 | coding    | PF03133 |
| MSTRG. 24604. 3  | 11271 | coding    | PF03133 |
| MSTRG. 24602. 1  | 622   | noncoding | —       |
| MSTRG. 24609. 7  | 4262  | noncoding | —       |
| MSTRG. 24619. 1  | 584   | noncoding | —       |
| MSTRG. 24620. 2  | 3870  | coding    | PF01433 |
| MSTRG. 24620. 3  | 3908  | coding    | PF01433 |
| MSTRG. 24620. 4  | 3998  | coding    | PF01433 |
| MSTRG. 24620. 5  | 2444  | coding    | PF01433 |
| MSTRG. 24621. 1  | 1243  | noncoding | —       |
| MSTRG. 24623. 3  | 5450  | coding    | PF00620 |
| MSTRG. 24625. 4  | 4400  | noncoding | —       |
| MSTRG. 24625. 5  | 4459  | noncoding | —       |
| MSTRG. 24629. 1  | 4852  | coding    | PF01504 |

|                 |      |           |         |
|-----------------|------|-----------|---------|
| MSTRG. 24629. 3 | 4705 | coding    | PF01504 |
| MSTRG. 24630. 1 | 3890 | coding    | PF12542 |
| MSTRG. 24633. 1 | 498  | coding    | PF15075 |
| MSTRG. 24637. 1 | 3862 | coding    | PF14604 |
| MSTRG. 24637. 3 | 3779 | coding    | PF14604 |
| MSTRG. 24637. 2 | 3859 | coding    | PF14604 |
| MSTRG. 24637. 4 | 3769 | coding    | PF14604 |
| MSTRG. 24640. 2 | 1258 | coding    | PF01280 |
| MSTRG. 24648. 1 | 4587 | noncoding | –       |
| MSTRG. 24649. 1 | 1468 | noncoding | –       |
| MSTRG. 24651. 1 | 2821 | coding    | PF10744 |
| MSTRG. 24651. 2 | 2721 | coding    | PF10744 |
| MSTRG. 24642. 6 | 8815 | coding    | PF00069 |
| MSTRG. 24642. 7 | 8397 | coding    | PF00069 |
| MSTRG. 24644. 1 | 4388 | coding    | PF09470 |
| MSTRG. 24656. 3 | 7706 | noncoding | –       |
| MSTRG. 24659. 3 | 1156 | coding    | PF04061 |
| MSTRG. 24659. 4 | 1296 | coding    | PF04061 |
| MSTRG. 24662. 2 | 3752 | coding    | PF11277 |
| MSTRG. 24663. 2 | 5656 | coding    | PF00105 |
| MSTRG. 24664. 2 | 2426 | coding    | PF00105 |
| MSTRG. 24666. 3 | 1845 | noncoding | –       |
| MSTRG. 24661. 3 | 3891 | coding    | PF09405 |
| MSTRG. 24661. 4 | 3907 | coding    | PF09405 |
| MSTRG. 24670. 1 | 862  | noncoding | –       |
| MSTRG. 24669. 3 | 2810 | coding    | PF00105 |
| MSTRG. 24669. 6 | 968  | noncoding | –       |
| MSTRG. 24673. 2 | 5594 | coding    | PF16898 |
| MSTRG. 24672. 1 | 1086 | noncoding | –       |
| MSTRG. 24676. 1 | 617  | noncoding | –       |
| MSTRG. 24676. 2 | 637  | noncoding | –       |
| MSTRG. 24677. 1 | 980  | noncoding | –       |
| MSTRG. 24693. 3 | 1713 | coding    | PF05822 |
| MSTRG. 24696. 1 | 2203 | coding    | PF00651 |
| MSTRG. 24696. 2 | 2161 | coding    | PF00651 |
| MSTRG. 24697. 2 | 4468 | coding    | PF16114 |
| MSTRG. 24697. 5 | 3955 | coding    | PF16114 |
| MSTRG. 24724. 1 | 3738 | coding    | PF15237 |
| MSTRG. 24724. 6 | 3109 | coding    | PF15237 |
| MSTRG. 24724. 5 | 3111 | coding    | PF15237 |
| MSTRG. 24724. 7 | 3182 | coding    | PF15237 |
| MSTRG. 24724. 2 | 3124 | coding    | PF15237 |
| MSTRG. 24724. 3 | 3130 | coding    | PF15237 |
| MSTRG. 24724. 4 | 2535 | coding    | PF15237 |
| MSTRG. 24725. 1 | 8191 | coding    | PF01496 |
| MSTRG. 24725. 2 | 7518 | coding    | PF01496 |
| MSTRG. 24725. 3 | 8208 | coding    | PF01496 |
| MSTRG. 24725. 4 | 7078 | coding    | PF01496 |
| MSTRG. 24725. 5 | 7635 | coding    | PF01496 |
| MSTRG. 24729. 1 | 2207 | coding    | PF01121 |
| MSTRG. 24729. 2 | 2513 | coding    | PF01121 |
| MSTRG. 24729. 3 | 2356 | coding    | PF01121 |
| MSTRG. 24729. 4 | 2375 | coding    | PF01121 |
| MSTRG. 24729. 5 | 2330 | coding    | PF01121 |

|                 |      |           |         |
|-----------------|------|-----------|---------|
| MSTRG. 24729. 6 | 2462 | coding    | PF01121 |
| MSTRG. 24732. 1 | 4646 | coding    | PF07106 |
| MSTRG. 24732. 2 | 4639 | coding    | PF07106 |
| MSTRG. 24732. 4 | 3510 | noncoding | –       |
| MSTRG. 24735. 4 | 2922 | noncoding | –       |
| MSTRG. 24710. 4 | 5220 | coding    | PF00856 |
| MSTRG. 24710. 5 | 4761 | coding    | PF00856 |
| MSTRG. 24706. 1 | 870  | coding    | PF04901 |
| MSTRG. 24711. 3 | 3937 | coding    | PF00069 |
| MSTRG. 24711. 4 | 3389 | coding    | PF00069 |
| MSTRG. 24717. 2 | 1139 | noncoding | –       |
| MSTRG. 24721. 1 | 7328 | coding    | PF02252 |
| MSTRG. 24721. 2 | 3548 | coding    | PF02252 |
| MSTRG. 24721. 4 | 2586 | coding    | PF02252 |
| MSTRG. 24722. 2 | 1987 | coding    | PF01179 |
| MSTRG. 24722. 4 | 2702 | coding    | PF01179 |
| MSTRG. 24714. 2 | 1008 | noncoding | –       |
| MSTRG. 24715. 2 | 3915 | noncoding | –       |
| MSTRG. 24741. 2 | 2503 | coding    | PF13602 |
| MSTRG. 24742. 3 | 3568 | coding    | PF00071 |
| MSTRG. 24743. 2 | 5864 | coding    | PF12820 |
| MSTRG. 24743. 3 | 5861 | coding    | PF12820 |
| MSTRG. 24745. 1 | 1012 | noncoding | –       |
| MSTRG. 24745. 2 | 993  | noncoding | –       |
| MSTRG. 24745. 3 | 848  | noncoding | –       |
| MSTRG. 24748. 1 | 1734 | coding    | PF00025 |
| MSTRG. 24763. 1 | 8495 | coding    | PF09793 |
| MSTRG. 24763. 3 | 1175 | coding    | PF09793 |
| MSTRG. 24768. 3 | 3575 | coding    | PF00850 |
| MSTRG. 24768. 7 | 3572 | coding    | PF00850 |
| MSTRG. 24769. 1 | 838  | noncoding | –       |
| MSTRG. 24772. 2 | 4165 | noncoding | –       |
| MSTRG. 24774. 5 | 3029 | coding    | PF14887 |
| MSTRG. 24774. 6 | 2961 | coding    | PF14887 |
| MSTRG. 24784. 2 | 6499 | coding    | PF01421 |
| MSTRG. 24784. 3 | 1759 | noncoding | –       |
| MSTRG. 24785. 3 | 2167 | coding    | PF00153 |
| MSTRG. 24788. 1 | 4465 | noncoding | –       |
| MSTRG. 24789. 1 | 1458 | noncoding | –       |
| MSTRG. 24792. 2 | 3819 | coding    | PF07535 |
| MSTRG. 24793. 1 | 284  | noncoding | –       |
| MSTRG. 24793. 2 | 314  | noncoding | –       |
| MSTRG. 24778. 1 | 1943 | coding    | PF00029 |
| MSTRG. 24782. 1 | 3551 | coding    | PF16004 |
| MSTRG. 24795. 2 | 2483 | coding    | PF01121 |
| MSTRG. 24801. 1 | 1316 | coding    | PF15313 |
| MSTRG. 24801. 2 | 1232 | coding    | PF15313 |
| MSTRG. 24805. 2 | 1400 | noncoding | –       |
| MSTRG. 24807. 1 | 462  | coding    | PF15310 |
| MSTRG. 24809. 1 | 4476 | coding    | PF00620 |
| MSTRG. 24810. 1 | 597  | noncoding | –       |
| MSTRG. 24814. 1 | 8097 | coding    | PF14914 |
| MSTRG. 24815. 2 | 1138 | noncoding | –       |
| MSTRG. 24816. 1 | 1141 | coding    | PF00062 |

|                  |       |           |         |
|------------------|-------|-----------|---------|
| MSTRG. 24816. 2  | 879   | coding    | PF00062 |
| MSTRG. 24817. 1  | 1151  | coding    | PF00110 |
| MSTRG. 24817. 2  | 3135  | coding    | PF00110 |
| MSTRG. 24820. 2  | 3456  | coding    | PF00004 |
| MSTRG. 24821. 1  | 450   | noncoding | —       |
| MSTRG. 24825. 1  | 1326  | noncoding | —       |
| MSTRG. 24826. 4  | 1526  | noncoding | —       |
| MSTRG. 24826. 6  | 1629  | noncoding | —       |
| MSTRG. 24826. 2  | 1744  | noncoding | —       |
| MSTRG. 24826. 3  | 1614  | noncoding | —       |
| MSTRG. 24826. 5  | 1717  | noncoding | —       |
| MSTRG. 24826. 7  | 1657  | noncoding | —       |
| MSTRG. 24826. 8  | 3047  | noncoding | —       |
| MSTRG. 24827. 6  | 4644  | coding    | PF15275 |
| MSTRG. 24827. 7  | 3014  | coding    | PF15275 |
| MSTRG. 24827. 8  | 3259  | coding    | PF15275 |
| MSTRG. 24827. 9  | 3023  | coding    | PF15275 |
| MSTRG. 24827. 10 | 3282  | coding    | PF15275 |
| MSTRG. 24827. 11 | 5862  | coding    | PF15275 |
| MSTRG. 24828. 1  | 5181  | noncoding | —       |
| MSTRG. 24830. 1  | 800   | noncoding | —       |
| MSTRG. 24833. 1  | 1370  | noncoding | —       |
| MSTRG. 24835. 1  | 5471  | coding    | PF00362 |
| MSTRG. 24836. 1  | 524   | noncoding | —       |
| MSTRG. 24837. 1  | 2644  | noncoding | —       |
| MSTRG. 24837. 2  | 1256  | noncoding | —       |
| MSTRG. 24837. 3  | 4802  | noncoding | —       |
| MSTRG. 24837. 4  | 4635  | noncoding | —       |
| MSTRG. 24837. 5  | 2188  | noncoding | —       |
| MSTRG. 24841. 2  | 5572  | noncoding | —       |
| MSTRG. 24841. 1  | 5644  | noncoding | —       |
| MSTRG. 24834. 3  | 1802  | noncoding | —       |
| MSTRG. 24844. 1  | 3702  | coding    | PF00069 |
| MSTRG. 24844. 2  | 3795  | coding    | PF00069 |
| MSTRG. 24844. 3  | 3444  | coding    | PF00069 |
| MSTRG. 24844. 8  | 3558  | coding    | PF00069 |
| MSTRG. 24844. 9  | 3651  | coding    | PF00069 |
| MSTRG. 24844. 10 | 2832  | coding    | PF00069 |
| MSTRG. 24846. 1  | 2165  | noncoding | —       |
| MSTRG. 24847. 1  | 606   | noncoding | —       |
| MSTRG. 24842. 4  | 932   | noncoding | —       |
| MSTRG. 24850. 1  | 7635  | noncoding | —       |
| MSTRG. 24849. 3  | 1613  | noncoding | —       |
| MSTRG. 24849. 2  | 11913 | coding    | PF12796 |
| MSTRG. 24852. 1  | 2157  | noncoding | —       |
| MSTRG. 24853. 1  | 2406  | noncoding | —       |
| MSTRG. 24854. 1  | 6835  | noncoding | —       |
| MSTRG. 24855. 1  | 7315  | noncoding | —       |
| MSTRG. 24856. 1  | 546   | noncoding | —       |
| MSTRG. 24858. 2  | 3011  | coding    | PF03188 |
| MSTRG. 24858. 3  | 2814  | coding    | PF03188 |
| MSTRG. 24858. 4  | 1041  | noncoding | —       |
| MSTRG. 24860. 3  | 2452  | coding    | PF01401 |
| MSTRG. 24861. 2  | 2898  | coding    | PF01401 |

|                  |       |           |         |
|------------------|-------|-----------|---------|
| MSTRG. 24861. 3  | 2801  | coding    | PF01401 |
| MSTRG. 24861. 4  | 2870  | coding    | PF01401 |
| MSTRG. 24861. 5  | 2456  | coding    | PF01401 |
| MSTRG. 24862. 1  | 2503  | coding    | PF00027 |
| MSTRG. 24866. 1  | 4554  | coding    | PF00069 |
| MSTRG. 24866. 2  | 4647  | coding    | PF00069 |
| MSTRG. 24866. 3  | 4795  | coding    | PF00069 |
| MSTRG. 24866. 7  | 2804  | coding    | PF00069 |
| MSTRG. 24867. 2  | 1336  | noncoding | —       |
| MSTRG. 24867. 4  | 1531  | noncoding | —       |
| MSTRG. 24867. 3  | 2531  | noncoding | —       |
| MSTRG. 24867. 5  | 2684  | noncoding | —       |
| MSTRG. 24867. 11 | 2268  | noncoding | —       |
| MSTRG. 24867. 7  | 2053  | noncoding | —       |
| MSTRG. 24867. 8  | 2711  | noncoding | —       |
| MSTRG. 24878. 1  | 1599  | coding    | PF00004 |
| MSTRG. 24879. 2  | 2451  | coding    | PF02201 |
| MSTRG. 24864. 1  | 5744  | coding    | PF06512 |
| MSTRG. 24865. 1  | 1096  | noncoding | —       |
| MSTRG. 24865. 2  | 1003  | noncoding | —       |
| MSTRG. 24869. 2  | 594   | noncoding | —       |
| MSTRG. 24869. 4  | 719   | noncoding | —       |
| MSTRG. 24869. 3  | 663   | noncoding | —       |
| MSTRG. 24871. 2  | 7757  | coding    | PF06479 |
| MSTRG. 24890. 1  | 1576  | noncoding | —       |
| MSTRG. 24892. 1  | 3231  | noncoding | —       |
| MSTRG. 24892. 3  | 1823  | noncoding | —       |
| MSTRG. 24892. 4  | 1986  | noncoding | —       |
| MSTRG. 24892. 5  | 2653  | noncoding | —       |
| MSTRG. 24892. 6  | 1699  | noncoding | —       |
| MSTRG. 24893. 3  | 4483  | coding    | PF00632 |
| MSTRG. 24885. 7  | 8941  | coding    | PF00439 |
| MSTRG. 24885. 6  | 11242 | coding    | PF00439 |
| MSTRG. 24885. 5  | 12732 | coding    | PF00439 |
| MSTRG. 24885. 3  | 12911 | coding    | PF00439 |
| MSTRG. 24885. 10 | 4715  | coding    | PF00439 |
| MSTRG. 24885. 11 | 5731  | coding    | PF00439 |
| MSTRG. 24885. 8  | 6583  | coding    | PF00439 |
| MSTRG. 24885. 9  | 8618  | coding    | PF00439 |
| MSTRG. 24898. 1  | 2126  | coding    | PF02121 |
| MSTRG. 24898. 2  | 8877  | coding    | PF02121 |
| MSTRG. 24898. 3  | 8633  | coding    | PF02121 |
| MSTRG. 24898. 4  | 4923  | coding    | PF02121 |
| MSTRG. 24898. 5  | 21385 | coding    | PF02121 |
| MSTRG. 24898. 6  | 2587  | coding    | PF02121 |
| MSTRG. 24903. 1  | 546   | noncoding | —       |
| MSTRG. 24913. 2  | 2408  | coding    | PF12612 |
| MSTRG. 24914. 2  | 2124  | noncoding | —       |
| MSTRG. 24911. 4  | 1027  | coding    | PF03881 |
| MSTRG. 24920. 1  | 2961  | noncoding | —       |
| MSTRG. 24922. 1  | 1031  | noncoding | —       |
| MSTRG. 24924. 2  | 2969  | coding    | PF02906 |
| MSTRG. 24925. 1  | 2589  | coding    | PF15169 |
| MSTRG. 24925. 2  | 2304  | coding    | PF15169 |

|                  |       |           |         |
|------------------|-------|-----------|---------|
| MSTRG. 24930. 1  | 707   | noncoding | -       |
| MSTRG. 24932. 1  | 498   | noncoding | -       |
| MSTRG. 24936. 1  | 2774  | noncoding | -       |
| MSTRG. 24936. 5  | 3619  | noncoding | -       |
| MSTRG. 24936. 4  | 2987  | noncoding | -       |
| MSTRG. 24936. 7  | 7426  | coding    | PF00069 |
| MSTRG. 24958. 2  | 2108  | coding    | PF01207 |
| MSTRG. 24958. 1  | 1909  | coding    | PF01207 |
| MSTRG. 24959. 1  | 2064  | coding    | PF10602 |
| MSTRG. 24959. 2  | 2065  | coding    | PF10602 |
| MSTRG. 24960. 1  | 2421  | coding    | PF02434 |
| MSTRG. 24960. 2  | 1305  | coding    | PF02434 |
| MSTRG. 24960. 4  | 1904  | coding    | PF02434 |
| MSTRG. 24960. 5  | 1709  | coding    | PF02434 |
| MSTRG. 24961. 1  | 363   | noncoding | -       |
| MSTRG. 24962. 2  | 3172  | noncoding | -       |
| MSTRG. 24963. 1  | 943   | coding    | PF09415 |
| MSTRG. 24969. 4  | 590   | coding    | PF12861 |
| MSTRG. 24971. 1  | 1390  | noncoding | -       |
| MSTRG. 24971. 2  | 1583  | noncoding | -       |
| MSTRG. 24971. 3  | 1584  | noncoding | -       |
| MSTRG. 24971. 4  | 2375  | noncoding | -       |
| MSTRG. 24960. 6  | 2295  | coding    | PF13848 |
| MSTRG. 24960. 7  | 3091  | coding    | PF13848 |
| MSTRG. 24944. 2  | 2368  | noncoding | -       |
| MSTRG. 24946. 4  | 2998  | coding    | PF12210 |
| MSTRG. 24946. 3  | 3208  | coding    | PF12210 |
| MSTRG. 24946. 5  | 2844  | coding    | PF12210 |
| MSTRG. 24948. 2  | 5015  | coding    | PF00025 |
| MSTRG. 24954. 3  | 4497  | noncoding | -       |
| MSTRG. 24954. 6  | 4071  | noncoding | -       |
| MSTRG. 24976. 3  | 1727  | noncoding | -       |
| MSTRG. 24976. 2  | 6384  | coding    | PF14538 |
| MSTRG. 24976. 4  | 4344  | noncoding | -       |
| MSTRG. 25009. 1  | 1824  | coding    | PF04493 |
| MSTRG. 25010. 1  | 4267  | noncoding | -       |
| MSTRG. 25010. 8  | 26122 | noncoding | -       |
| MSTRG. 25010. 10 | 15805 | coding    | PF00097 |
| MSTRG. 25010. 11 | 14989 | coding    | PF00097 |
| MSTRG. 25010. 12 | 17561 | noncoding | -       |
| MSTRG. 25010. 13 | 19457 | noncoding | -       |
| MSTRG. 25010. 6  | 5698  | noncoding | -       |
| MSTRG. 25010. 4  | 5072  | noncoding | -       |
| MSTRG. 25010. 7  | 6570  | coding    | PF00097 |
| MSTRG. 25010. 3  | 10018 | coding    | PF00097 |
| MSTRG. 25010. 5  | 13084 | coding    | PF00097 |
| MSTRG. 25012. 1  | 626   | noncoding | -       |
| MSTRG. 25010. 15 | 3029  | noncoding | -       |
| MSTRG. 25010. 16 | 5993  | noncoding | -       |
| MSTRG. 24992. 2  | 3891  | coding    | PF01055 |
| MSTRG. 24993. 1  | 4227  | noncoding | -       |
| MSTRG. 24993. 3  | 4218  | noncoding | -       |
| MSTRG. 24993. 4  | 4209  | noncoding | -       |
| MSTRG. 24993. 5  | 4260  | noncoding | -       |

|                 |       |           |         |
|-----------------|-------|-----------|---------|
| MSTRG. 24986. 1 | 4634  | noncoding | -       |
| MSTRG. 24996. 1 | 5368  | noncoding | -       |
| MSTRG. 25001. 2 | 4738  | coding    | PF06079 |
| MSTRG. 25001. 4 | 3523  | coding    | PF06079 |
| MSTRG. 25003. 2 | 3322  | coding    | PF00965 |
| MSTRG. 25006. 1 | 3092  | coding    | PF01369 |
| MSTRG. 25006. 3 | 1470  | noncoding | -       |
| MSTRG. 25020. 1 | 6881  | coding    | PF07810 |
| MSTRG. 25020. 4 | 6540  | coding    | PF07810 |
| MSTRG. 25020. 5 | 805   | noncoding | -       |
| MSTRG. 25021. 1 | 8322  | coding    | PF16608 |
| MSTRG. 25021. 2 | 8421  | coding    | PF16608 |
| MSTRG. 25021. 3 | 8140  | coding    | PF16608 |
| MSTRG. 25027. 4 | 13261 | coding    | PF00735 |
| MSTRG. 25027. 7 | 3509  | coding    | PF00735 |
| MSTRG. 25027. 9 | 3148  | coding    | PF00735 |
| MSTRG. 25027. 8 | 3010  | coding    | PF00735 |
| MSTRG. 25028. 2 | 2643  | coding    | PF04707 |
| MSTRG. 25029. 1 | 644   | noncoding | -       |
| MSTRG. 25031. 2 | 1261  | coding    | PF15024 |
| MSTRG. 25031. 3 | 1172  | noncoding | -       |
| MSTRG. 25031. 1 | 1581  | noncoding | -       |
| MSTRG. 25031. 4 | 1080  | noncoding | -       |
| MSTRG. 25033. 2 | 5271  | coding    | PF05978 |
| MSTRG. 25032. 4 | 1791  | noncoding | -       |
| MSTRG. 25039. 3 | 2050  | coding    | PF00777 |
| MSTRG. 25041. 2 | 2329  | noncoding | -       |
| MSTRG. 25038. 1 | 347   | noncoding | -       |
| MSTRG. 25042. 1 | 1789  | noncoding | -       |
| MSTRG. 25045. 3 | 17801 | noncoding | -       |
| MSTRG. 25049. 1 | 946   | noncoding | -       |
| MSTRG. 25050. 2 | 4803  | coding    | PF16043 |
| MSTRG. 25050. 4 | 4748  | coding    | PF16043 |
| MSTRG. 25050. 5 | 4588  | coding    | PF16043 |
| MSTRG. 25051. 3 | 671   | noncoding | -       |
| MSTRG. 25051. 4 | 705   | noncoding | -       |
| MSTRG. 25051. 6 | 529   | noncoding | -       |
| MSTRG. 25053. 6 | 3789  | coding    | PF03081 |
| MSTRG. 25058. 1 | 6310  | coding    | PF01756 |
| MSTRG. 25058. 3 | 5036  | coding    | PF01756 |
| MSTRG. 25059. 1 | 4919  | noncoding | -       |
| MSTRG. 25055. 1 | 1166  | coding    | PF00097 |
| MSTRG. 25056. 1 | 2202  | noncoding | -       |
| MSTRG. 25060. 3 | 1782  | noncoding | -       |
| MSTRG. 25063. 2 | 3017  | coding    | PF00125 |
| MSTRG. 25063. 1 | 2085  | coding    | PF00125 |
| MSTRG. 25064. 2 | 1718  | coding    | PF10509 |
| MSTRG. 25067. 2 | 4699  | noncoding | -       |
| MSTRG. 25067. 3 | 3767  | noncoding | -       |
| MSTRG. 25070. 1 | 1230  | noncoding | -       |
| MSTRG. 25070. 2 | 1226  | noncoding | -       |
| MSTRG. 25070. 4 | 1103  | noncoding | -       |
| MSTRG. 25072. 4 | 1876  | coding    | PF12928 |
| MSTRG. 25072. 3 | 1927  | coding    | PF12928 |



|               |       |           |         |
|---------------|-------|-----------|---------|
| MSTRG.25074.2 | 5927  | noncoding | -       |
| MSTRG.25074.3 | 5395  | noncoding | -       |
| MSTRG.25071.3 | 2311  | coding    | PF14604 |
| MSTRG.25078.3 | 5819  | coding    | PF00790 |
| MSTRG.25079.3 | 1302  | coding    | PF00177 |
| MSTRG.25079.2 | 1337  | coding    | PF00177 |
| MSTRG.25078.4 | 4415  | coding    | PF00790 |
| MSTRG.25080.2 | 2569  | coding    | PF07575 |
| MSTRG.25076.2 | 1596  | coding    | PF11976 |
| MSTRG.25076.3 | 1395  | coding    | PF11976 |
| MSTRG.25085.2 | 915   | noncoding | -       |
| MSTRG.25085.3 | 976   | coding    | PF06941 |
| MSTRG.25081.1 | 4825  | coding    | PF15227 |
| MSTRG.25090.3 | 627   | coding    | PF05873 |
| MSTRG.25108.4 | 2469  | noncoding | -       |
| MSTRG.25108.7 | 3781  | noncoding | -       |
| MSTRG.25109.1 | 556   | noncoding | -       |
| MSTRG.25110.1 | 3299  | noncoding | -       |
| MSTRG.25103.2 | 2692  | noncoding | -       |
| MSTRG.25103.3 | 2849  | noncoding | -       |
| MSTRG.25103.5 | 2673  | noncoding | -       |
| MSTRG.25103.4 | 2530  | noncoding | -       |
| MSTRG.25103.6 | 1178  | noncoding | -       |
| MSTRG.25105.1 | 600   | coding    | PF01781 |
| MSTRG.25104.1 | 420   | noncoding | -       |
| MSTRG.25107.1 | 361   | noncoding | -       |
| MSTRG.25116.1 | 2839  | noncoding | -       |
| MSTRG.25116.3 | 2932  | noncoding | -       |
| MSTRG.25115.1 | 531   | noncoding | -       |
| MSTRG.25118.2 | 3063  | coding    | PF15434 |
| MSTRG.25120.1 | 1300  | noncoding | -       |
| MSTRG.25123.1 | 1882  | noncoding | -       |
| MSTRG.25124.1 | 3395  | coding    | PF12444 |
| MSTRG.25124.2 | 3212  | noncoding | -       |
| MSTRG.25125.1 | 710   | noncoding | -       |
| MSTRG.25143.1 | 12557 | noncoding | -       |
| MSTRG.25143.2 | 8309  | noncoding | -       |
| MSTRG.25143.3 | 11757 | noncoding | -       |
| MSTRG.25128.1 | 1347  | noncoding | -       |
| MSTRG.25138.1 | 335   | noncoding | -       |
| MSTRG.25139.1 | 355   | noncoding | -       |
| MSTRG.25150.4 | 1968  | noncoding | -       |
| MSTRG.25166.1 | 1073  | noncoding | -       |
| MSTRG.25167.1 | 5831  | coding    | PF00005 |
| MSTRG.25167.3 | 4062  | coding    | PF00005 |
| MSTRG.25168.1 | 12953 | coding    | PF00005 |
| MSTRG.25164.2 | 1353  | noncoding | -       |
| MSTRG.25164.1 | 1616  | noncoding | -       |
| MSTRG.25164.4 | 962   | noncoding | -       |
| MSTRG.25170.1 | 11362 | noncoding | -       |
| MSTRG.25174.2 | 1432  | noncoding | -       |
| MSTRG.25174.3 | 1229  | noncoding | -       |
| MSTRG.25176.4 | 1056  | noncoding | -       |
| MSTRG.25176.5 | 941   | noncoding | -       |

|                |       |           |         |
|----------------|-------|-----------|---------|
| MSTRG. 25181.1 | 2664  | noncoding | —       |
| MSTRG. 25185.1 | 1658  | coding    | PF00778 |
| MSTRG. 25195.1 | 6724  | noncoding | —       |
| MSTRG. 25195.2 | 3588  | noncoding | —       |
| MSTRG. 25196.3 | 2257  | noncoding | —       |
| MSTRG. 25196.4 | 3413  | coding    | PF14846 |
| MSTRG. 25196.5 | 1317  | noncoding | —       |
| MSTRG. 25196.6 | 974   | noncoding | —       |
| MSTRG. 25198.1 | 252   | noncoding | —       |
| MSTRG. 25190.3 | 2162  | coding    | PF00069 |
| MSTRG. 25205.4 | 11675 | coding    | PF13087 |
| MSTRG. 25205.5 | 10439 | coding    | PF13087 |
| MSTRG. 25206.1 | 6205  | noncoding | —       |
| MSTRG. 25205.6 | 4450  | coding    | PF13087 |
| MSTRG. 25207.1 | 5238  | noncoding | —       |
| MSTRG. 25207.2 | 7627  | noncoding | —       |
| MSTRG. 25207.3 | 6341  | noncoding | —       |
| MSTRG. 25207.4 | 3421  | noncoding | —       |
| MSTRG. 25208.1 | 228   | noncoding | —       |
| MSTRG. 25211.1 | 4934  | noncoding | —       |
| MSTRG. 25214.1 | 1695  | noncoding | —       |
| MSTRG. 25214.2 | 1465  | noncoding | —       |
| MSTRG. 25217.1 | 2281  | noncoding | —       |
| MSTRG. 25232.1 | 728   | noncoding | —       |
| MSTRG. 25248.1 | 8683  | noncoding | —       |
| MSTRG. 25254.2 | 2374  | noncoding | —       |
| MSTRG. 25221.1 | 449   | noncoding | —       |
| MSTRG. 25224.3 | 453   | noncoding | —       |
| MSTRG. 25226.1 | 42879 | noncoding | —       |
| MSTRG. 25226.3 | 24386 | noncoding | —       |
| MSTRG. 25226.5 | 29446 | noncoding | —       |
| MSTRG. 25226.4 | 5068  | noncoding | —       |
| MSTRG. 25226.8 | 18140 | noncoding | —       |
| MSTRG. 25255.4 | 3569  | noncoding | —       |
| MSTRG. 25255.1 | 3842  | noncoding | —       |
| MSTRG. 25256.1 | 3715  | noncoding | —       |
| MSTRG. 25257.1 | 2836  | noncoding | —       |
| MSTRG. 25258.1 | 4419  | noncoding | —       |
| MSTRG. 25255.6 | 1523  | noncoding | —       |
| MSTRG. 25268.6 | 8427  | coding    | PF12125 |
| MSTRG. 25269.1 | 2351  | noncoding | —       |
| MSTRG. 25280.2 | 711   | noncoding | —       |
| MSTRG. 25261.1 | 8665  | noncoding | —       |
| MSTRG. 25262.1 | 1090  | noncoding | —       |
| MSTRG. 25262.2 | 2753  | noncoding | —       |
| MSTRG. 25265.1 | 327   | noncoding | —       |
| MSTRG. 25281.1 | 648   | noncoding | —       |
| MSTRG. 25285.2 | 610   | coding    | PF16906 |
| MSTRG. 25290.3 | 3122  | noncoding | —       |
| MSTRG. 25297.2 | 467   | noncoding | —       |
| MSTRG. 25298.1 | 8269  | noncoding | —       |
| MSTRG. 25302.1 | 450   | noncoding | —       |
| MSTRG. 25310.1 | 1409  | noncoding | —       |
| MSTRG. 25318.1 | 5283  | noncoding | —       |

|                 |       |           |         |
|-----------------|-------|-----------|---------|
| MSTRG. 25315. 1 | 3060  | noncoding | -       |
| MSTRG. 25327. 1 | 6625  | noncoding | -       |
| MSTRG. 25327. 2 | 6227  | noncoding | -       |
| MSTRG. 25327. 3 | 6422  | noncoding | -       |
| MSTRG. 25328. 1 | 1634  | noncoding | -       |
| MSTRG. 25329. 1 | 432   | noncoding | -       |
| MSTRG. 25335. 1 | 4392  | coding    | PF10291 |
| MSTRG. 25335. 2 | 924   | noncoding | -       |
| MSTRG. 25342. 1 | 8478  | noncoding | -       |
| MSTRG. 25342. 4 | 3121  | noncoding | -       |
| MSTRG. 25342. 5 | 4266  | noncoding | -       |
| MSTRG. 25343. 1 | 1942  | noncoding | -       |
| MSTRG. 25348. 2 | 8093  | noncoding | -       |
| MSTRG. 25350. 2 | 1348  | coding    | PF01039 |
| MSTRG. 25351. 2 | 8899  | coding    | PF15963 |
| MSTRG. 25351. 3 | 8911  | coding    | PF15963 |
| MSTRG. 25351. 4 | 8545  | coding    | PF15963 |
| MSTRG. 25356. 2 | 529   | noncoding | -       |
| MSTRG. 25359. 1 | 1883  | coding    | PF04056 |
| MSTRG. 25359. 4 | 2800  | coding    | PF04056 |
| MSTRG. 25353. 1 | 1332  | coding    | PF07303 |
| MSTRG. 25353. 3 | 1460  | coding    | PF07303 |
| MSTRG. 25354. 1 | 554   | noncoding | -       |
| MSTRG. 25354. 2 | 442   | noncoding | -       |
| MSTRG. 25361. 1 | 5129  | coding    | PF02291 |
| MSTRG. 25361. 3 | 1558  | coding    | PF13238 |
| MSTRG. 25364. 1 | 4927  | noncoding | -       |
| MSTRG. 25362. 2 | 1145  | coding    | PF00134 |
| MSTRG. 25372. 1 | 1132  | coding    | PF16454 |
| MSTRG. 25384. 1 | 6240  | noncoding | -       |
| MSTRG. 25384. 2 | 5039  | noncoding | -       |
| MSTRG. 25384. 3 | 4718  | noncoding | -       |
| MSTRG. 25384. 6 | 3715  | noncoding | -       |
| MSTRG. 25388. 1 | 6357  | noncoding | -       |
| MSTRG. 25388. 5 | 4953  | noncoding | -       |
| MSTRG. 25388. 6 | 5056  | noncoding | -       |
| MSTRG. 25388. 7 | 2264  | noncoding | -       |
| MSTRG. 25389. 1 | 5097  | noncoding | -       |
| MSTRG. 25390. 1 | 11291 | noncoding | -       |
| MSTRG. 25389. 2 | 3937  | noncoding | -       |
| MSTRG. 25389. 3 | 1855  | noncoding | -       |
| MSTRG. 25409. 4 | 3756  | coding    | PF06159 |
| MSTRG. 25409. 5 | 2417  | coding    | PF06159 |
| MSTRG. 25409. 7 | 1142  | noncoding | -       |
| MSTRG. 25410. 2 | 3773  | coding    | PF00025 |
| MSTRG. 25413. 2 | 2839  | coding    | PF00160 |
| MSTRG. 25413. 3 | 2169  | coding    | PF00160 |
| MSTRG. 25413. 4 | 2150  | coding    | PF00160 |
| MSTRG. 25413. 5 | 2179  | coding    | PF00160 |
| MSTRG. 25413. 6 | 1575  | coding    | PF00160 |
| MSTRG. 25413. 7 | 1608  | coding    | PF00160 |
| MSTRG. 25415. 1 | 9823  | coding    | PF11802 |
| MSTRG. 25415. 2 | 18583 | coding    | PF11802 |
| MSTRG. 25415. 3 | 2862  | noncoding | -       |

|                  |       |           |         |
|------------------|-------|-----------|---------|
| MSTRG. 25415. 4  | 5627  | coding    | PF11802 |
| MSTRG. 25417. 1  | 1202  | noncoding | —       |
| MSTRG. 25399. 1  | 2987  | noncoding | —       |
| MSTRG. 25391. 1  | 301   | noncoding | —       |
| MSTRG. 25405. 2  | 1895  | noncoding | —       |
| MSTRG. 25406. 1  | 3551  | noncoding | —       |
| MSTRG. 25405. 3  | 714   | noncoding | —       |
| MSTRG. 25433. 2  | 1874  | noncoding | —       |
| MSTRG. 25434. 1  | 881   | noncoding | —       |
| MSTRG. 25435. 3  | 1455  | coding    | PF00398 |
| MSTRG. 25436. 1  | 4578  | coding    | PF00225 |
| MSTRG. 25436. 2  | 8276  | coding    | PF00225 |
| MSTRG. 25436. 5  | 6502  | coding    | PF00225 |
| MSTRG. 25437. 1  | 422   | noncoding | —       |
| MSTRG. 25441. 2  | 1713  | noncoding | —       |
| MSTRG. 25447. 2  | 6968  | noncoding | —       |
| MSTRG. 25447. 6  | 7262  | noncoding | —       |
| MSTRG. 25447. 7  | 4417  | noncoding | —       |
| MSTRG. 25448. 1  | 14866 | noncoding | —       |
| MSTRG. 25444. 1  | 1474  | noncoding | —       |
| MSTRG. 25451. 4  | 1430  | noncoding | —       |
| MSTRG. 25462. 1  | 784   | noncoding | —       |
| MSTRG. 25463. 1  | 2357  | noncoding | —       |
| MSTRG. 25465. 1  | 5133  | noncoding | —       |
| MSTRG. 25472. 5  | 4124  | coding    | PF15337 |
| MSTRG. 25472. 6  | 3652  | coding    | PF15337 |
| MSTRG. 25472. 7  | 3340  | coding    | PF15337 |
| MSTRG. 25472. 8  | 3336  | coding    | PF15337 |
| MSTRG. 25477. 1  | 5869  | noncoding | —       |
| MSTRG. 25477. 2  | 5231  | noncoding | —       |
| MSTRG. 25478. 1  | 2937  | noncoding | —       |
| MSTRG. 25478. 3  | 1058  | noncoding | —       |
| MSTRG. 25478. 5  | 1449  | noncoding | —       |
| MSTRG. 25480. 3  | 11363 | coding    | PF00069 |
| MSTRG. 25480. 4  | 6358  | coding    | PF00069 |
| MSTRG. 25483. 1  | 307   | noncoding | —       |
| MSTRG. 25483. 2  | 681   | noncoding | —       |
| MSTRG. 25484. 2  | 1189  | noncoding | —       |
| MSTRG. 25489. 2  | 2381  | noncoding | —       |
| MSTRG. 25489. 3  | 2832  | noncoding | —       |
| MSTRG. 25491. 1  | 13597 | coding    | PF10482 |
| MSTRG. 25492. 4  | 1368  | noncoding | —       |
| MSTRG. 25492. 3  | 3246  | noncoding | —       |
| MSTRG. 25492. 5  | 3072  | noncoding | —       |
| MSTRG. 25499. 3  | 4457  | noncoding | —       |
| MSTRG. 25499. 2  | 3603  | noncoding | —       |
| MSTRG. 25499. 6  | 5750  | noncoding | —       |
| MSTRG. 25499. 7  | 8983  | coding    | PF00255 |
| MSTRG. 25499. 8  | 2989  | noncoding | —       |
| MSTRG. 25499. 10 | 1487  | noncoding | —       |
| MSTRG. 25508. 1  | 1788  | coding    | PF00025 |
| MSTRG. 25508. 3  | 38923 | coding    | PF02544 |
| MSTRG. 25508. 4  | 8021  | coding    | PF00025 |
| MSTRG. 25508. 5  | 2699  | coding    | PF00025 |

|                 |       |           |         |
|-----------------|-------|-----------|---------|
| MSTRG. 25508.6  | 24803 | coding    | PF02544 |
| MSTRG. 25508.7  | 2019  | noncoding | —       |
| MSTRG. 25509.1  | 14736 | noncoding | —       |
| MSTRG. 25508.9  | 16875 | coding    | PF00025 |
| MSTRG. 25508.8  | 5854  | coding    | PF00025 |
| MSTRG. 25510.1  | 217   | noncoding | —       |
| MSTRG. 25508.10 | 36845 | noncoding | —       |
| MSTRG. 25508.11 | 36294 | noncoding | —       |
| MSTRG. 25508.12 | 20867 | noncoding | —       |
| MSTRG. 25508.13 | 5482  | noncoding | —       |
| MSTRG. 25511.1  | 2739  | noncoding | —       |
| MSTRG. 25512.1  | 15326 | noncoding | —       |
| MSTRG. 25512.2  | 9003  | noncoding | —       |
| MSTRG. 25513.1  | 2518  | coding    | PF00078 |
| MSTRG. 25514.1  | 6360  | noncoding | —       |
| MSTRG. 25508.14 | 1988  | noncoding | —       |
| MSTRG. 25517.1  | 3843  | noncoding | —       |
| MSTRG. 25517.3  | 1079  | noncoding | —       |
| MSTRG. 25517.4  | 4098  | noncoding | —       |
| MSTRG. 25518.2  | 5150  | coding    | PF00092 |
| MSTRG. 25528.2  | 15915 | noncoding | —       |
| MSTRG. 25528.3  | 2998  | noncoding | —       |
| MSTRG. 25529.1  | 3827  | noncoding | —       |
| MSTRG. 25528.4  | 8754  | noncoding | —       |
| MSTRG. 25530.1  | 11380 | noncoding | —       |
| MSTRG. 25531.1  | 1806  | noncoding | —       |
| MSTRG. 25532.1  | 3828  | noncoding | —       |
| MSTRG. 25537.2  | 6941  | noncoding | —       |
| MSTRG. 25537.1  | 7083  | noncoding | —       |
| MSTRG. 25537.3  | 7415  | noncoding | —       |
| MSTRG. 25540.1  | 2205  | noncoding | —       |
| MSTRG. 25546.1  | 3534  | noncoding | —       |
| MSTRG. 25550.3  | 3671  | coding    | PF15025 |
| MSTRG. 25552.1  | 5168  | coding    | PF08540 |
| MSTRG. 25552.2  | 4593  | coding    | PF08540 |
| MSTRG. 25552.3  | 5240  | coding    | PF08540 |
| MSTRG. 25552.4  | 5059  | coding    | PF08540 |
| MSTRG. 25552.5  | 4325  | coding    | PF08540 |
| MSTRG. 25552.6  | 4220  | coding    | PF08540 |
| MSTRG. 25552.7  | 4796  | coding    | PF08540 |
| MSTRG. 25552.9  | 4939  | coding    | PF08540 |
| MSTRG. 25552.10 | 4404  | coding    | PF08540 |
| MSTRG. 25556.3  | 8588  | noncoding | —       |
| MSTRG. 25557.2  | 3311  | coding    | PF00651 |
| MSTRG. 25571.1  | 1412  | noncoding | —       |
| MSTRG. 25577.7  | 5034  | noncoding | —       |
| MSTRG. 25577.8  | 4986  | noncoding | —       |
| MSTRG. 25582.3  | 1726  | coding    | PF00069 |
| MSTRG. 25593.2  | 4104  | noncoding | —       |
| MSTRG. 25594.1  | 1113  | noncoding | —       |
| MSTRG. 25595.1  | 7260  | coding    | PF14664 |
| MSTRG. 25601.2  | 10029 | noncoding | —       |
| MSTRG. 25597.2  | 3615  | coding    | PF00054 |
| MSTRG. 25597.3  | 2186  | noncoding | —       |

|                 |       |           |         |
|-----------------|-------|-----------|---------|
| MSTRG. 25598.2  | 863   | noncoding | —       |
| MSTRG. 25598.1  | 944   | noncoding | —       |
| MSTRG. 25599.1  | 3121  | noncoding | —       |
| MSTRG. 25597.4  | 18623 | noncoding | —       |
| MSTRG. 25602.1  | 6907  | noncoding | —       |
| MSTRG. 25602.2  | 2038  | noncoding | —       |
| MSTRG. 25602.4  | 6243  | noncoding | —       |
| MSTRG. 25602.5  | 1209  | noncoding | —       |
| MSTRG. 25604.3  | 4743  | coding    | PF08801 |
| MSTRG. 25604.2  | 6040  | coding    | PF08801 |
| MSTRG. 25615.2  | 10947 | coding    | PF15392 |
| MSTRG. 25615.6  | 10631 | coding    | PF15392 |
| MSTRG. 25615.7  | 10511 | coding    | PF15392 |
| MSTRG. 25615.9  | 10222 | coding    | PF15392 |
| MSTRG. 25615.10 | 4545  | coding    | PF15392 |
| MSTRG. 25607.5  | 8835  | coding    | PF12830 |
| MSTRG. 25608.1  | 1340  | noncoding | —       |
| MSTRG. 25609.1  | 5375  | noncoding | —       |
| MSTRG. 25610.1  | 2379  | noncoding | —       |
| MSTRG. 25610.2  | 4780  | noncoding | —       |
| MSTRG. 25611.1  | 2976  | noncoding | —       |
| MSTRG. 25614.1  | 335   | noncoding | —       |
| MSTRG. 25616.2  | 1652  | noncoding | —       |
| MSTRG. 25616.3  | 3233  | noncoding | —       |
| MSTRG. 25620.2  | 6336  | coding    | PF04791 |
| MSTRG. 25626.1  | 2003  | noncoding | —       |
| MSTRG. 25622.1  | 481   | noncoding | —       |
| MSTRG. 25622.2  | 375   | noncoding | —       |
| MSTRG. 25623.1  | 211   | noncoding | —       |
| MSTRG. 25630.1  | 420   | noncoding | —       |
| MSTRG. 25631.2  | 1467  | coding    | PF04427 |
| MSTRG. 25632.2  | 3216  | coding    | PF02144 |
| MSTRG. 25632.4  | 1647  | coding    | PF02144 |
| MSTRG. 25635.1  | 11265 | noncoding | —       |
| MSTRG. 25637.2  | 4834  | coding    | PF12796 |
| MSTRG. 25638.1  | 4132  | noncoding | —       |
| MSTRG. 25638.2  | 519   | noncoding | —       |
| MSTRG. 25642.1  | 408   | noncoding | —       |
| MSTRG. 25642.2  | 504   | noncoding | —       |
| MSTRG. 25639.1  | 393   | noncoding | —       |
| MSTRG. 25653.1  | 2351  | noncoding | —       |
| MSTRG. 25654.2  | 1395  | coding    | PF02229 |
| MSTRG. 25654.3  | 1152  | coding    | PF02229 |
| MSTRG. 25657.6  | 4201  | coding    | PF07528 |
| MSTRG. 25657.7  | 2841  | coding    | PF07528 |
| MSTRG. 25664.2  | 2497  | coding    | PF00028 |
| MSTRG. 25667.1  | 349   | noncoding | —       |
| MSTRG. 25711.1  | 1141  | noncoding | —       |
| MSTRG. 25711.2  | 1477  | noncoding | —       |
| MSTRG. 25711.3  | 1356  | noncoding | —       |
| MSTRG. 25711.4  | 1108  | noncoding | —       |
| MSTRG. 25712.1  | 3786  | noncoding | —       |
| MSTRG. 25711.5  | 2097  | noncoding | —       |
| MSTRG. 25711.6  | 2046  | noncoding | —       |

|               |       |           |         |
|---------------|-------|-----------|---------|
| MSTRG.25711.7 | 3557  | noncoding | -       |
| MSTRG.25707.1 | 835   | noncoding | -       |
| MSTRG.25718.1 | 602   | noncoding | -       |
| MSTRG.25723.2 | 1365  | coding    | PF00063 |
| MSTRG.25725.1 | 671   | noncoding | -       |
| MSTRG.25726.3 | 1252  | noncoding | -       |
| MSTRG.25730.2 | 1010  | coding    | PF12906 |
| MSTRG.25734.2 | 3012  | coding    | PF07260 |
| MSTRG.25734.3 | 2636  | coding    | PF07260 |
| MSTRG.25736.1 | 778   | noncoding | -       |
| MSTRG.25734.4 | 1746  | noncoding | -       |
| MSTRG.25737.2 | 2652  | coding    | PF16218 |
| MSTRG.25747.4 | 9126  | coding    | PF16609 |
| MSTRG.25747.2 | 9650  | coding    | PF16609 |
| MSTRG.25748.1 | 2419  | noncoding | -       |
| MSTRG.25748.2 | 3561  | noncoding | -       |
| MSTRG.25739.1 | 757   | noncoding | -       |
| MSTRG.25749.1 | 685   | noncoding | -       |
| MSTRG.25750.1 | 403   | noncoding | -       |
| MSTRG.25750.2 | 340   | noncoding | -       |
| MSTRG.25752.1 | 2192  | noncoding | -       |
| MSTRG.25760.4 | 5418  | coding    | PF12906 |
| MSTRG.25757.2 | 980   | coding    | PF01738 |
| MSTRG.25771.2 | 11892 | coding    | PF01403 |
| MSTRG.25772.1 | 1502  | noncoding | -       |
| MSTRG.25771.3 | 7875  | coding    | PF01403 |
| MSTRG.25771.4 | 6934  | coding    | PF01403 |
| MSTRG.25771.5 | 7071  | noncoding | -       |
| MSTRG.25778.1 | 2963  | coding    | PF00667 |
| MSTRG.25779.2 | 1130  | coding    | PF08368 |
| MSTRG.25779.3 | 1851  | coding    | PF08373 |
| MSTRG.25773.1 | 500   | noncoding | -       |
| MSTRG.25781.2 | 3337  | coding    | PF00211 |
| MSTRG.25782.1 | 472   | noncoding | -       |
| MSTRG.25782.2 | 436   | noncoding | -       |
| MSTRG.25784.1 | 16447 | noncoding | -       |
| MSTRG.25785.2 | 3735  | coding    | PF02544 |
| MSTRG.25790.1 | 668   | noncoding | -       |
| MSTRG.25796.1 | 4655  | coding    | PF05986 |
| MSTRG.25796.2 | 4335  | coding    | PF05986 |
| MSTRG.25798.1 | 3653  | noncoding | -       |
| MSTRG.25799.1 | 2572  | noncoding | -       |
| MSTRG.25802.1 | 879   | noncoding | -       |
| MSTRG.25802.2 | 1259  | noncoding | -       |
| MSTRG.25803.1 | 689   | noncoding | -       |
| MSTRG.25808.1 | 1838  | noncoding | -       |
| MSTRG.25809.1 | 3260  | noncoding | -       |
| MSTRG.25809.2 | 2587  | noncoding | -       |
| MSTRG.25809.3 | 2629  | noncoding | -       |
| MSTRG.25806.1 | 982   | noncoding | -       |
| MSTRG.25817.2 | 2247  | noncoding | -       |
| MSTRG.25817.3 | 2261  | noncoding | -       |
| MSTRG.25828.1 | 2371  | coding    | PF01529 |
| MSTRG.25824.4 | 2041  | noncoding | -       |

|                |       |           |         |
|----------------|-------|-----------|---------|
| MSTRG.25847.1  | 696   | noncoding | -       |
| MSTRG.25848.1  | 1081  | noncoding | -       |
| MSTRG.25848.2  | 1018  | noncoding | -       |
| MSTRG.25849.1  | 421   | noncoding | -       |
| MSTRG.25857.1  | 6607  | noncoding | -       |
| MSTRG.25858.1  | 3482  | noncoding | -       |
| MSTRG.25857.2  | 393   | noncoding | -       |
| MSTRG.25861.1  | 847   | noncoding | -       |
| MSTRG.25862.1  | 415   | noncoding | -       |
| MSTRG.25869.1  | 205   | noncoding | -       |
| MSTRG.25872.1  | 406   | noncoding | -       |
| MSTRG.25897.4  | 1542  | coding    | PF07192 |
| MSTRG.25897.6  | 1436  | coding    | PF07192 |
| MSTRG.25897.3  | 4580  | coding    | PF07192 |
| MSTRG.25897.7  | 1440  | coding    | PF07192 |
| MSTRG.25898.1  | 2869  | noncoding | -       |
| MSTRG.25897.11 | 1765  | noncoding | -       |
| MSTRG.25897.12 | 3440  | noncoding | -       |
| MSTRG.25897.13 | 4352  | noncoding | -       |
| MSTRG.25897.14 | 5061  | noncoding | -       |
| MSTRG.25874.2  | 4964  | coding    | PF16212 |
| MSTRG.25874.1  | 5426  | coding    | PF16212 |
| MSTRG.25907.2  | 1342  | coding    | PF06936 |
| MSTRG.25907.3  | 19924 | coding    | PF06936 |
| MSTRG.25911.2  | 1834  | coding    | PF12796 |
| MSTRG.25912.2  | 2312  | coding    | PF14694 |
| MSTRG.25916.1  | 3794  | coding    | PF03798 |
| MSTRG.25916.2  | 3680  | coding    | PF03798 |
| MSTRG.25917.1  | 267   | noncoding | -       |
| MSTRG.25923.1  | 1748  | noncoding | -       |
| MSTRG.25926.4  | 3431  | noncoding | -       |
| MSTRG.25926.5  | 1901  | noncoding | -       |
| MSTRG.25927.1  | 3352  | noncoding | -       |
| MSTRG.25928.1  | 1857  | noncoding | -       |
| MSTRG.25926.6  | 1515  | noncoding | -       |
| MSTRG.25929.1  | 5050  | noncoding | -       |
| MSTRG.25940.1  | 1795  | noncoding | -       |
| MSTRG.25940.5  | 1844  | noncoding | -       |
| MSTRG.25940.3  | 1974  | noncoding | -       |
| MSTRG.25949.3  | 15747 | coding    | PF07714 |
| MSTRG.25950.1  | 3394  | noncoding | -       |
| MSTRG.25951.1  | 5369  | noncoding | -       |
| MSTRG.25949.5  | 10204 | coding    | PF07714 |
| MSTRG.25949.6  | 11330 | coding    | PF07714 |
| MSTRG.25949.7  | 17518 | coding    | PF07714 |
| MSTRG.25949.8  | 2546  | coding    | PF07714 |
| MSTRG.25956.1  | 532   | noncoding | -       |
| MSTRG.25958.1  | 26829 | noncoding | -       |
| MSTRG.25958.2  | 8176  | noncoding | -       |
| MSTRG.25958.3  | 3776  | noncoding | -       |
| MSTRG.25959.1  | 8696  | noncoding | -       |
| MSTRG.25959.2  | 10958 | noncoding | -       |
| MSTRG.25959.3  | 6712  | noncoding | -       |
| MSTRG.25959.5  | 16774 | noncoding | -       |



|                 |       |           |         |
|-----------------|-------|-----------|---------|
| MSTRG. 25959.4  | 17125 | noncoding | -       |
| MSTRG. 25959.6  | 4839  | noncoding | -       |
| MSTRG. 25959.7  | 13851 | noncoding | -       |
| MSTRG. 25959.8  | 11937 | noncoding | -       |
| MSTRG. 25960.1  | 3998  | coding    | PF00105 |
| MSTRG. 25972.1  | 218   | noncoding | -       |
| MSTRG. 25973.2  | 2112  | noncoding | -       |
| MSTRG. 25973.3  | 3226  | coding    | PF00168 |
| MSTRG. 25973.4  | 2653  | coding    | PF00168 |
| MSTRG. 25973.6  | 2069  | noncoding | -       |
| MSTRG. 25977.1  | 10607 | noncoding | -       |
| MSTRG. 25977.2  | 16060 | noncoding | -       |
| MSTRG. 25977.3  | 7133  | noncoding | -       |
| MSTRG. 25978.2  | 18683 | noncoding | -       |
| MSTRG. 25975.1  | 313   | noncoding | -       |
| MSTRG. 25980.2  | 421   | noncoding | -       |
| MSTRG. 25997.5  | 12110 | coding    | PF00176 |
| MSTRG. 25997.4  | 9397  | coding    | PF00176 |
| MSTRG. 25997.1  | 11258 | coding    | PF00176 |
| MSTRG. 25997.2  | 12658 | coding    | PF00176 |
| MSTRG. 25997.6  | 10680 | coding    | PF00176 |
| MSTRG. 25998.1  | 1930  | noncoding | -       |
| MSTRG. 25997.8  | 6298  | coding    | PF00176 |
| MSTRG. 25997.7  | 7077  | coding    | PF00176 |
| MSTRG. 25997.9  | 8731  | coding    | PF00176 |
| MSTRG. 25997.10 | 7215  | coding    | PF00176 |
| MSTRG. 25997.11 | 8637  | coding    | PF00176 |
| MSTRG. 25997.12 | 14487 | coding    | PF00176 |
| MSTRG. 25997.13 | 5331  | noncoding | -       |
| MSTRG. 25997.14 | 2870  | coding    | PF00176 |
| MSTRG. 25997.18 | 1386  | noncoding | -       |
| MSTRG. 25997.19 | 921   | noncoding | -       |
| MSTRG. 25997.20 | 4207  | noncoding | -       |
| MSTRG. 25997.21 | 2487  | noncoding | -       |
| MSTRG. 25989.1  | 23672 | noncoding | -       |
| MSTRG. 25989.2  | 39319 | noncoding | -       |
| MSTRG. 25989.3  | 23588 | noncoding | -       |
| MSTRG. 25989.5  | 32246 | noncoding | -       |
| MSTRG. 25989.6  | 15457 | noncoding | -       |
| MSTRG. 25991.1  | 20908 | noncoding | -       |
| MSTRG. 25991.2  | 18247 | noncoding | -       |
| MSTRG. 25991.3  | 20275 | noncoding | -       |
| MSTRG. 25991.4  | 22100 | noncoding | -       |
| MSTRG. 25991.5  | 19830 | noncoding | -       |
| MSTRG. 25985.2  | 5532  | coding    | PF00777 |
| MSTRG. 25986.1  | 7329  | coding    | PF00777 |
| MSTRG. 25992.2  | 3054  | coding    | PF03137 |
| MSTRG. 25993.1  | 6645  | noncoding | -       |
| MSTRG. 25994.1  | 4359  | noncoding | -       |
| MSTRG. 25994.2  | 6254  | noncoding | -       |
| MSTRG. 25995.1  | 6918  | noncoding | -       |
| MSTRG. 25992.3  | 13343 | coding    | PF03137 |
| MSTRG. 25992.4  | 6482  | coding    | PF03137 |
| MSTRG. 26010.2  | 4100  | noncoding | -       |

|               |       |           |         |
|---------------|-------|-----------|---------|
| MSTRG.26010.3 | 2682  | noncoding | -       |
| MSTRG.26016.1 | 11793 | noncoding | -       |
| MSTRG.26018.1 | 1578  | noncoding | -       |
| MSTRG.26021.1 | 2418  | noncoding | -       |
| MSTRG.26026.5 | 805   | coding    | PF09737 |
| MSTRG.26026.4 | 820   | coding    | PF09737 |
| MSTRG.26026.2 | 1082  | coding    | PF09737 |
| MSTRG.26026.3 | 824   | coding    | PF09737 |
| MSTRG.26028.1 | 2305  | coding    | PF00517 |
| MSTRG.26033.1 | 1293  | noncoding | -       |
| MSTRG.26034.1 | 331   | noncoding | -       |
| MSTRG.26034.3 | 2331  | coding    | PF00077 |
| MSTRG.26034.2 | 4955  | coding    | PF00607 |
| MSTRG.26034.4 | 4973  | coding    | PF00077 |
| MSTRG.26034.5 | 2173  | coding    | PF00077 |
| MSTRG.26034.6 | 1542  | noncoding | -       |
| MSTRG.26034.7 | 4006  | noncoding | -       |
| MSTRG.26031.2 | 897   | coding    | PF14204 |
| MSTRG.26031.3 | 442   | noncoding | -       |
| MSTRG.26035.2 | 7070  | coding    | PF00193 |
| MSTRG.26035.3 | 7160  | coding    | PF00193 |
| MSTRG.26036.1 | 2325  | coding    | PF00754 |
| MSTRG.26038.2 | 2412  | noncoding | -       |
| MSTRG.26038.3 | 2409  | noncoding | -       |
| MSTRG.26037.1 | 1309  | noncoding | -       |
| MSTRG.26041.2 | 3647  | noncoding | -       |
| MSTRG.26042.1 | 2141  | coding    | PF00909 |
| MSTRG.26042.2 | 1876  | coding    | PF00909 |
| MSTRG.26051.1 | 8774  | coding    | PF00225 |
| MSTRG.26052.1 | 4419  | coding    | PF03036 |
| MSTRG.26053.3 | 447   | noncoding | -       |
| MSTRG.26053.4 | 2943  | noncoding | -       |
| MSTRG.26045.2 | 1229  | noncoding | -       |
| MSTRG.26048.1 | 469   | noncoding | -       |
| MSTRG.26047.2 | 1448  | coding    | PF01217 |
| MSTRG.26059.1 | 3971  | coding    | PF01403 |
| MSTRG.26059.2 | 3667  | coding    | PF01403 |
| MSTRG.26083.4 | 5228  | noncoding | -       |
| MSTRG.26083.5 | 5044  | noncoding | -       |
| MSTRG.26087.7 | 10290 | noncoding | -       |
| MSTRG.26087.6 | 4148  | noncoding | -       |
| MSTRG.26087.5 | 3517  | coding    | PF00233 |
| MSTRG.26088.1 | 7531  | noncoding | -       |
| MSTRG.26089.1 | 6681  | noncoding | -       |
| MSTRG.26091.1 | 7219  | coding    | PF16368 |
| MSTRG.26091.4 | 3141  | coding    | PF16368 |
| MSTRG.26091.2 | 3246  | coding    | PF16368 |
| MSTRG.26093.1 | 520   | noncoding | -       |
| MSTRG.26096.1 | 979   | noncoding | -       |
| MSTRG.26102.2 | 1474  | noncoding | -       |
| MSTRG.26106.1 | 15798 | coding    | PF02093 |
| MSTRG.26106.2 | 13290 | coding    | PF02093 |
| MSTRG.26107.2 | 3511  | noncoding | -       |
| MSTRG.26108.1 | 540   | coding    | PF02594 |

|                |       |           |         |
|----------------|-------|-----------|---------|
| MSTRG.26109.1  | 2726  | noncoding | -       |
| MSTRG.26111.4  | 3973  | coding    | PF00009 |
| MSTRG.26112.2  | 423   | noncoding | -       |
| MSTRG.26112.3  | 1127  | noncoding | -       |
| MSTRG.26112.4  | 860   | noncoding | -       |
| MSTRG.26113.1  | 1358  | noncoding | -       |
| MSTRG.26118.3  | 4374  | noncoding | -       |
| MSTRG.26118.11 | 6181  | noncoding | -       |
| MSTRG.26118.12 | 9895  | noncoding | -       |
| MSTRG.26118.13 | 4935  | noncoding | -       |
| MSTRG.26120.1  | 4674  | noncoding | -       |
| MSTRG.26121.1  | 3028  | noncoding | -       |
| MSTRG.26123.1  | 3287  | coding    | PF03114 |
| MSTRG.26123.2  | 1408  | coding    | PF03114 |
| MSTRG.26123.8  | 1850  | coding    | PF03114 |
| MSTRG.26123.10 | 1335  | coding    | PF03114 |
| MSTRG.26123.12 | 1328  | coding    | PF03114 |
| MSTRG.26123.11 | 1235  | coding    | PF03114 |
| MSTRG.26123.9  | 1146  | coding    | PF03114 |
| MSTRG.26123.14 | 898   | coding    | PF03114 |
| MSTRG.26123.13 | 938   | coding    | PF03114 |
| MSTRG.26124.2  | 5382  | noncoding | -       |
| MSTRG.26126.2  | 4109  | noncoding | -       |
| MSTRG.26126.4  | 3476  | noncoding | -       |
| MSTRG.26122.2  | 1474  | coding    | PF00651 |
| MSTRG.26138.1  | 604   | noncoding | -       |
| MSTRG.26139.1  | 2457  | noncoding | -       |
| MSTRG.26142.2  | 1049  | coding    | PF00112 |
| MSTRG.26142.3  | 2460  | coding    | PF00112 |
| MSTRG.26147.3  | 2064  | coding    | PF09298 |
| MSTRG.26148.1  | 9818  | noncoding | -       |
| MSTRG.26147.6  | 3220  | coding    | PF09298 |
| MSTRG.26154.2  | 2253  | coding    | PF10185 |
| MSTRG.26154.3  | 2162  | coding    | PF10185 |
| MSTRG.26158.3  | 1162  | noncoding | -       |
| MSTRG.26163.1  | 560   | noncoding | -       |
| MSTRG.26171.1  | 6146  | noncoding | -       |
| MSTRG.26171.3  | 7785  | noncoding | -       |
| MSTRG.26171.4  | 3672  | noncoding | -       |
| MSTRG.26171.5  | 1518  | noncoding | -       |
| MSTRG.26180.1  | 7134  | coding    | PF00595 |
| MSTRG.26180.2  | 8458  | coding    | PF00791 |
| MSTRG.26180.5  | 6718  | coding    | PF00791 |
| MSTRG.26180.6  | 6529  | coding    | PF00791 |
| MSTRG.26180.13 | 7839  | coding    | PF00791 |
| MSTRG.26181.1  | 3014  | coding    | PF00791 |
| MSTRG.26180.14 | 2527  | noncoding | -       |
| MSTRG.26180.17 | 2256  | noncoding | -       |
| MSTRG.26180.18 | 1326  | noncoding | -       |
| MSTRG.26180.19 | 9047  | noncoding | -       |
| MSTRG.26180.20 | 26612 | noncoding | -       |
| MSTRG.26180.21 | 8254  | noncoding | -       |
| MSTRG.26184.2  | 1338  | noncoding | -       |
| MSTRG.26184.3  | 963   | noncoding | -       |

|                |       |           |         |
|----------------|-------|-----------|---------|
| MSTRG.26184.5  | 1096  | noncoding | -       |
| MSTRG.26185.1  | 4473  | coding    | PF01483 |
| MSTRG.26185.3  | 4254  | coding    | PF01483 |
| MSTRG.26186.1  | 492   | noncoding | -       |
| MSTRG.26187.1  | 824   | noncoding | -       |
| MSTRG.26182.2  | 1683  | coding    | PF14580 |
| MSTRG.26192.1  | 424   | noncoding | -       |
| MSTRG.26194.17 | 1423  | coding    | PF02093 |
| MSTRG.26189.2  | 667   | coding    | PF02931 |
| MSTRG.26190.1  | 1002  | noncoding | -       |
| MSTRG.26203.1  | 246   | noncoding | -       |
| MSTRG.26212.1  | 3666  | noncoding | -       |
| MSTRG.26213.1  | 1251  | noncoding | -       |
| MSTRG.26213.2  | 724   | noncoding | -       |
| MSTRG.26213.3  | 1158  | noncoding | -       |
| MSTRG.26213.5  | 993   | noncoding | -       |
| MSTRG.26213.6  | 1186  | noncoding | -       |
| MSTRG.26214.3  | 2289  | coding    | PF00226 |
| MSTRG.26215.3  | 1320  | coding    | PF00400 |
| MSTRG.26216.1  | 786   | noncoding | -       |
| MSTRG.26220.2  | 2170  | coding    | PF00330 |
| MSTRG.26224.1  | 2289  | coding    | PF02931 |
| MSTRG.26224.2  | 2211  | coding    | PF02931 |
| MSTRG.26224.3  | 1843  | coding    | PF02931 |
| MSTRG.26224.4  | 1964  | coding    | PF02931 |
| MSTRG.26224.5  | 2057  | coding    | PF02931 |
| MSTRG.26226.1  | 3010  | noncoding | -       |
| MSTRG.26226.2  | 2367  | noncoding | -       |
| MSTRG.26227.1  | 3151  | noncoding | -       |
| MSTRG.26230.2  | 917   | coding    | PF01012 |
| MSTRG.26232.3  | 4501  | coding    | PF16501 |
| MSTRG.26232.4  | 4543  | coding    | PF16501 |
| MSTRG.26232.5  | 4836  | coding    | PF16501 |
| MSTRG.26240.5  | 8868  | noncoding | -       |
| MSTRG.26240.6  | 8902  | noncoding | -       |
| MSTRG.26240.7  | 8984  | noncoding | -       |
| MSTRG.26241.1  | 2166  | noncoding | -       |
| MSTRG.26242.1  | 4045  | noncoding | -       |
| MSTRG.26244.1  | 7431  | noncoding | -       |
| MSTRG.26244.2  | 10588 | noncoding | -       |
| MSTRG.26245.1  | 1493  | noncoding | -       |
| MSTRG.26246.1  | 2879  | noncoding | -       |
| MSTRG.26240.8  | 7701  | noncoding | -       |
| MSTRG.26247.1  | 299   | noncoding | -       |
| MSTRG.26247.2  | 726   | noncoding | -       |
| MSTRG.26249.1  | 301   | noncoding | -       |
| MSTRG.26239.1  | 2552  | coding    | PF07679 |
| MSTRG.26239.2  | 3114  | coding    | PF07679 |
| MSTRG.26239.4  | 2929  | coding    | PF07679 |
| MSTRG.26259.5  | 2217  | noncoding | -       |
| MSTRG.26260.1  | 2657  | noncoding | -       |
| MSTRG.26257.1  | 1169  | noncoding | -       |
| MSTRG.26257.2  | 676   | noncoding | -       |
| MSTRG.26265.1  | 803   | noncoding | -       |

|               |       |           |         |
|---------------|-------|-----------|---------|
| MSTRG.26266.1 | 4380  | noncoding | -       |
| MSTRG.26266.2 | 4687  | noncoding | -       |
| MSTRG.26266.3 | 8370  | noncoding | -       |
| MSTRG.26281.1 | 579   | noncoding | -       |
| MSTRG.26282.2 | 1077  | coding    | PF02284 |
| MSTRG.26286.2 | 2082  | coding    | PF01238 |
| MSTRG.26287.5 | 2347  | noncoding | -       |
| MSTRG.26287.3 | 2175  | noncoding | -       |
| MSTRG.26287.4 | 2535  | coding    | PF04144 |
| MSTRG.26278.1 | 1762  | noncoding | -       |
| MSTRG.26291.3 | 2085  | noncoding | -       |
| MSTRG.26291.6 | 3753  | noncoding | -       |
| MSTRG.26291.4 | 1900  | noncoding | -       |
| MSTRG.26292.1 | 793   | noncoding | -       |
| MSTRG.26297.3 | 1622  | noncoding | -       |
| MSTRG.26297.4 | 438   | noncoding | -       |
| MSTRG.26299.1 | 1677  | noncoding | -       |
| MSTRG.26301.1 | 654   | noncoding | -       |
| MSTRG.26303.1 | 2450  | coding    | PF01186 |
| MSTRG.26308.1 | 528   | noncoding | -       |
| MSTRG.26308.2 | 1069  | noncoding | -       |
| MSTRG.26315.1 | 2055  | noncoding | -       |
| MSTRG.26316.1 | 959   | noncoding | -       |
| MSTRG.26321.1 | 6211  | coding    | PF00013 |
| MSTRG.26321.2 | 5536  | coding    | PF00013 |
| MSTRG.26321.3 | 3454  | coding    | PF00013 |
| MSTRG.26321.4 | 1941  | coding    | PF00013 |
| MSTRG.26321.5 | 901   | noncoding | -       |
| MSTRG.26322.1 | 5065  | noncoding | -       |
| MSTRG.26323.1 | 1334  | noncoding | -       |
| MSTRG.26324.1 | 1472  | noncoding | -       |
| MSTRG.26325.1 | 3553  | noncoding | -       |
| MSTRG.26338.1 | 780   | noncoding | -       |
| MSTRG.26340.1 | 2171  | coding    | PF00250 |
| MSTRG.26340.2 | 2180  | coding    | PF00250 |
| MSTRG.26337.1 | 1268  | noncoding | -       |
| MSTRG.26337.2 | 565   | noncoding | -       |
| MSTRG.26343.1 | 2952  | coding    | PF00069 |
| MSTRG.26344.1 | 10880 | noncoding | -       |
| MSTRG.26345.1 | 499   | noncoding | -       |
| MSTRG.26345.2 | 4968  | noncoding | -       |
| MSTRG.26346.1 | 6128  | noncoding | -       |
| MSTRG.26347.1 | 4033  | noncoding | -       |
| MSTRG.26348.1 | 3108  | noncoding | -       |
| MSTRG.26349.1 | 2223  | noncoding | -       |
| MSTRG.26369.3 | 3240  | coding    | PF13771 |
| MSTRG.26369.2 | 5484  | coding    | PF13771 |
| MSTRG.26369.4 | 3084  | coding    | PF13771 |
| MSTRG.26369.5 | 3124  | coding    | PF13771 |
| MSTRG.26370.2 | 1928  | noncoding | -       |
| MSTRG.26373.2 | 2225  | coding    | PF00092 |
| MSTRG.26373.3 | 1934  | coding    | PF00092 |
| MSTRG.26374.1 | 2953  | coding    | PF08232 |
| MSTRG.26375.1 | 4161  | noncoding | -       |

|                |       |           |         |
|----------------|-------|-----------|---------|
| MSTRG.26376.1  | 1015  | noncoding | -       |
| MSTRG.26377.1  | 1177  | noncoding | -       |
| MSTRG.26374.5  | 7315  | coding    | PF08232 |
| MSTRG.26374.6  | 4190  | coding    | PF08232 |
| MSTRG.26374.7  | 6254  | coding    | PF08232 |
| MSTRG.26374.8  | 3885  | noncoding | -       |
| MSTRG.26375.2  | 2554  | noncoding | -       |
| MSTRG.26378.2  | 6230  | coding    | PF01217 |
| MSTRG.26379.7  | 8244  | coding    | PF00632 |
| MSTRG.26379.6  | 8762  | coding    | PF00632 |
| MSTRG.26379.9  | 9470  | coding    | PF00632 |
| MSTRG.26386.1  | 3775  | noncoding | -       |
| MSTRG.26391.2  | 1948  | coding    | PF10609 |
| MSTRG.26391.3  | 2194  | coding    | PF10609 |
| MSTRG.26391.4  | 8553  | coding    | PF10609 |
| MSTRG.26391.5  | 6652  | noncoding | -       |
| MSTRG.26394.3  | 8019  | coding    | PF00620 |
| MSTRG.26394.4  | 7898  | coding    | PF00620 |
| MSTRG.26394.5  | 6297  | coding    | PF00620 |
| MSTRG.26394.8  | 6397  | coding    | PF00620 |
| MSTRG.26395.1  | 13016 | coding    | PF00078 |
| MSTRG.26394.10 | 1681  | coding    | PF00620 |
| MSTRG.26394.9  | 1684  | coding    | PF00620 |
| MSTRG.26389.1  | 467   | noncoding | -       |
| MSTRG.26428.1  | 4596  | noncoding | -       |
| MSTRG.26428.4  | 3000  | noncoding | -       |
| MSTRG.26433.1  | 7197  | noncoding | -       |
| MSTRG.26434.1  | 2738  | noncoding | -       |
| MSTRG.26433.2  | 8570  | noncoding | -       |
| MSTRG.26428.7  | 1453  | noncoding | -       |
| MSTRG.26399.8  | 867   | coding    | PF10238 |
| MSTRG.26399.7  | 1235  | coding    | PF10238 |
| MSTRG.26405.1  | 2714  | noncoding | -       |
| MSTRG.26405.2  | 2821  | coding    | PF00241 |
| MSTRG.26405.5  | 1461  | coding    | PF00241 |
| MSTRG.26405.4  | 1348  | noncoding | -       |
| MSTRG.26405.6  | 1374  | noncoding | -       |
| MSTRG.26411.4  | 3345  | coding    | PF00439 |
| MSTRG.26411.5  | 5026  | coding    | PF10537 |
| MSTRG.26411.3  | 5204  | coding    | PF10537 |
| MSTRG.26412.1  | 882   | noncoding | -       |
| MSTRG.26413.1  | 2210  | noncoding | -       |
| MSTRG.26415.1  | 701   | noncoding | -       |
| MSTRG.26408.1  | 1728  | noncoding | -       |
| MSTRG.26439.1  | 2663  | coding    | PF14774 |
| MSTRG.26448.3  | 7988  | coding    | PF02145 |
| MSTRG.26448.1  | 9313  | coding    | PF02145 |
| MSTRG.26448.2  | 7948  | coding    | PF02145 |
| MSTRG.26448.5  | 9130  | coding    | PF02145 |
| MSTRG.26448.6  | 5474  | noncoding | -       |
| MSTRG.26448.7  | 2807  | noncoding | -       |
| MSTRG.26452.3  | 1883  | noncoding | -       |
| MSTRG.26453.1  | 5024  | coding    | PF01359 |
| MSTRG.26455.1  | 3176  | coding    | PF00078 |

|                |       |           |         |
|----------------|-------|-----------|---------|
| MSTRG.26446.4  | 1044  | noncoding | -       |
| MSTRG.26446.5  | 1180  | noncoding | -       |
| MSTRG.26477.1  | 562   | noncoding | -       |
| MSTRG.26491.1  | 13411 | noncoding | -       |
| MSTRG.26493.1  | 8540  | noncoding | -       |
| MSTRG.26495.1  | 570   | noncoding | -       |
| MSTRG.26498.1  | 2470  | noncoding | -       |
| MSTRG.26498.2  | 2910  | noncoding | -       |
| MSTRG.26461.4  | 6779  | noncoding | -       |
| MSTRG.26461.2  | 4952  | noncoding | -       |
| MSTRG.26461.3  | 4680  | noncoding | -       |
| MSTRG.26461.5  | 5441  | noncoding | -       |
| MSTRG.26469.2  | 1226  | coding    | PF04938 |
| MSTRG.26470.2  | 950   | coding    | PF04051 |
| MSTRG.26470.3  | 936   | coding    | PF04051 |
| MSTRG.26470.4  | 943   | coding    | PF04051 |
| MSTRG.26515.1  | 542   | noncoding | -       |
| MSTRG.26515.2  | 495   | noncoding | -       |
| MSTRG.26515.3  | 484   | noncoding | -       |
| MSTRG.26521.1  | 238   | noncoding | -       |
| MSTRG.26533.1  | 1136  | noncoding | -       |
| MSTRG.26541.1  | 449   | noncoding | -       |
| MSTRG.26567.1  | 669   | noncoding | -       |
| MSTRG.26569.2  | 2828  | noncoding | -       |
| MSTRG.26569.5  | 2735  | noncoding | -       |
| MSTRG.26569.6  | 2684  | noncoding | -       |
| MSTRG.26569.7  | 2780  | noncoding | -       |
| MSTRG.26569.8  | 2348  | noncoding | -       |
| MSTRG.26569.3  | 2368  | noncoding | -       |
| MSTRG.26569.4  | 2563  | noncoding | -       |
| MSTRG.26569.10 | 2762  | noncoding | -       |
| MSTRG.26569.11 | 2682  | noncoding | -       |
| MSTRG.26569.12 | 2394  | noncoding | -       |
| MSTRG.26569.9  | 2682  | noncoding | -       |
| MSTRG.26570.1  | 7061  | noncoding | -       |
| MSTRG.26571.1  | 33450 | noncoding | -       |
| MSTRG.26571.2  | 14308 | noncoding | -       |
| MSTRG.26573.1  | 10341 | coding    | PF00078 |
| MSTRG.26574.1  | 2247  | noncoding | -       |
| MSTRG.26574.2  | 5220  | noncoding | -       |
| MSTRG.26571.3  | 18727 | noncoding | -       |
| MSTRG.26572.4  | 3130  | noncoding | -       |
| MSTRG.26572.5  | 3284  | noncoding | -       |
| MSTRG.26572.6  | 9534  | noncoding | -       |
| MSTRG.26572.7  | 2309  | noncoding | -       |
| MSTRG.26572.8  | 2007  | noncoding | -       |
| MSTRG.26572.9  | 1299  | noncoding | -       |
| MSTRG.26572.10 | 8995  | coding    | PF00078 |
| MSTRG.26572.11 | 3965  | noncoding | -       |
| MSTRG.26572.12 | 5635  | noncoding | -       |
| MSTRG.26572.13 | 1101  | noncoding | -       |
| MSTRG.26572.14 | 891   | noncoding | -       |
| MSTRG.26572.15 | 2886  | noncoding | -       |
| MSTRG.26572.16 | 2430  | noncoding | -       |

|                  |       |           |         |
|------------------|-------|-----------|---------|
| MSTRG. 26572. 17 | 2618  | noncoding | -       |
| MSTRG. 26575. 1  | 1122  | noncoding | -       |
| MSTRG. 26542. 4  | 3006  | noncoding | -       |
| MSTRG. 26542. 3  | 3111  | noncoding | -       |
| MSTRG. 26542. 6  | 2986  | noncoding | -       |
| MSTRG. 26552. 3  | 6140  | coding    | PF02023 |
| MSTRG. 26552. 5  | 5089  | coding    | PF02023 |
| MSTRG. 26553. 2  | 3978  | noncoding | -       |
| MSTRG. 26553. 1  | 5365  | noncoding | -       |
| MSTRG. 26554. 2  | 15592 | coding    | PF09038 |
| MSTRG. 26554. 1  | 13137 | coding    | PF09038 |
| MSTRG. 26554. 4  | 10289 | coding    | PF09038 |
| MSTRG. 26554. 3  | 10817 | coding    | PF09038 |
| MSTRG. 26554. 5  | 9845  | coding    | PF09038 |
| MSTRG. 26555. 3  | 10721 | noncoding | -       |
| MSTRG. 26557. 2  | 5570  | coding    | PF00328 |
| MSTRG. 26546. 1  | 3161  | noncoding | -       |
| MSTRG. 26547. 1  | 2801  | noncoding | -       |
| MSTRG. 26547. 2  | 1189  | noncoding | -       |
| MSTRG. 26548. 3  | 2002  | coding    | PF00085 |
| MSTRG. 26548. 5  | 1961  | coding    | PF00085 |
| MSTRG. 26560. 1  | 3969  | noncoding | -       |
| MSTRG. 26563. 1  | 7566  | coding    | PF05622 |
| MSTRG. 26586. 3  | 3880  | coding    | PF04802 |
| MSTRG. 26593. 1  | 3523  | coding    | PF15149 |
| MSTRG. 26585. 2  | 3641  | noncoding | -       |
| MSTRG. 26594. 3  | 2292  | coding    | PF14670 |
| MSTRG. 26595. 1  | 8872  | noncoding | -       |
| MSTRG. 26596. 1  | 2139  | noncoding | -       |
| MSTRG. 26598. 1  | 5320  | coding    | PF02099 |
| MSTRG. 26602. 2  | 4051  | coding    | PF02204 |
| MSTRG. 26602. 3  | 3595  | coding    | PF02204 |
| MSTRG. 26601. 2  | 1916  | coding    | PF01650 |
| MSTRG. 26611. 2  | 3685  | coding    | PF15387 |
| MSTRG. 26614. 1  | 2622  | noncoding | -       |
| MSTRG. 26615. 1  | 507   | noncoding | -       |
| MSTRG. 26615. 2  | 352   | noncoding | -       |
| MSTRG. 26616. 1  | 630   | coding    | PF02285 |
| MSTRG. 26616. 2  | 659   | noncoding | -       |
| MSTRG. 26617. 2  | 1034  | coding    | PF15238 |
| MSTRG. 26617. 3  | 12032 | coding    | PF15238 |
| MSTRG. 26617. 4  | 3096  | coding    | PF15238 |
| MSTRG. 26620. 4  | 588   | noncoding | -       |
| MSTRG. 26624. 4  | 2951  | coding    | PF00270 |
| MSTRG. 26623. 3  | 796   | coding    | PF06140 |
| MSTRG. 26630. 3  | 2431  | noncoding | -       |
| MSTRG. 26630. 2  | 5018  | noncoding | -       |
| MSTRG. 26630. 4  | 4532  | noncoding | -       |
| MSTRG. 26636. 2  | 6429  | noncoding | -       |
| MSTRG. 26637. 4  | 10247 | noncoding | -       |
| MSTRG. 26637. 5  | 3446  | noncoding | -       |
| MSTRG. 26644. 1  | 5081  | noncoding | -       |
| MSTRG. 26645. 1  | 3179  | noncoding | -       |
| MSTRG. 26644. 2  | 5081  | noncoding | -       |



|                |       |           |         |
|----------------|-------|-----------|---------|
| MSTRG.26644.5  | 10489 | noncoding | -       |
| MSTRG.26642.1  | 942   | coding    | PF00462 |
| MSTRG.26643.1  | 3302  | noncoding | -       |
| MSTRG.26646.1  | 1512  | coding    | PF01840 |
| MSTRG.26647.1  | 1053  | noncoding | -       |
| MSTRG.26647.2  | 1120  | coding    | PF01840 |
| MSTRG.26651.1  | 512   | noncoding | -       |
| MSTRG.26652.1  | 7735  | noncoding | -       |
| MSTRG.26657.2  | 2391  | coding    | PF05303 |
| MSTRG.26658.2  | 2534  | noncoding | -       |
| MSTRG.26660.2  | 5979  | coding    | PF04928 |
| MSTRG.26660.1  | 3056  | coding    | PF04928 |
| MSTRG.26660.8  | 2773  | coding    | PF04928 |
| MSTRG.26660.6  | 2622  | coding    | PF04928 |
| MSTRG.26660.10 | 3368  | coding    | PF04928 |
| MSTRG.26660.11 | 4747  | noncoding | -       |
| MSTRG.26660.12 | 10064 | coding    | PF04928 |
| MSTRG.26665.1  | 2000  | noncoding | -       |
| MSTRG.26662.1  | 464   | noncoding | -       |
| MSTRG.26667.1  | 604   | noncoding | -       |
| MSTRG.26668.1  | 553   | noncoding | -       |
| MSTRG.26671.1  | 871   | noncoding | -       |
| MSTRG.26675.2  | 2951  | coding    | PF09273 |
| MSTRG.26675.6  | 3007  | coding    | PF09273 |
| MSTRG.26675.7  | 2822  | coding    | PF09273 |
| MSTRG.26675.5  | 2908  | coding    | PF09273 |
| MSTRG.26675.8  | 2778  | coding    | PF09273 |
| MSTRG.26675.11 | 1880  | noncoding | -       |
| MSTRG.26675.12 | 7139  | noncoding | -       |
| MSTRG.26677.2  | 8769  | noncoding | -       |
| MSTRG.26677.1  | 888   | noncoding | -       |
| MSTRG.26680.2  | 2512  | noncoding | -       |
| MSTRG.26684.1  | 2340  | coding    | PF00568 |
| MSTRG.26684.2  | 3926  | coding    | PF00568 |
| MSTRG.26684.4  | 3633  | coding    | PF00568 |
| MSTRG.26684.6  | 2223  | coding    | PF00568 |
| MSTRG.26685.3  | 6828  | noncoding | -       |
| MSTRG.26685.2  | 6100  | noncoding | -       |
| MSTRG.26686.1  | 2589  | coding    | PF00153 |
| MSTRG.26688.1  | 1573  | noncoding | -       |
| MSTRG.26707.1  | 291   | noncoding | -       |
| MSTRG.26709.1  | 737   | noncoding | -       |
| MSTRG.26710.1  | 2046  | coding    | PF01603 |
| MSTRG.26710.3  | 1839  | coding    | PF01603 |
| MSTRG.26710.11 | 1751  | coding    | PF01603 |
| MSTRG.26710.12 | 2061  | coding    | PF01603 |
| MSTRG.26711.1  | 1567  | noncoding | -       |
| MSTRG.26708.1  | 1562  | noncoding | -       |
| MSTRG.26715.1  | 1488  | noncoding | -       |
| MSTRG.26715.2  | 2068  | noncoding | -       |
| MSTRG.26715.3  | 1650  | noncoding | -       |
| MSTRG.26715.4  | 1546  | noncoding | -       |
| MSTRG.26715.7  | 1378  | noncoding | -       |
| MSTRG.26715.8  | 1370  | noncoding | -       |

|                |       |           |         |
|----------------|-------|-----------|---------|
| MSTRG.26715.9  | 1184  | noncoding | -       |
| MSTRG.26720.2  | 2280  | noncoding | -       |
| MSTRG.26720.5  | 3617  | noncoding | -       |
| MSTRG.26720.6  | 5043  | noncoding | -       |
| MSTRG.26720.7  | 3182  | noncoding | -       |
| MSTRG.26712.4  | 1156  | coding    | PF00069 |
| MSTRG.26712.3  | 1604  | coding    | PF00069 |
| MSTRG.26712.2  | 1872  | coding    | PF00069 |
| MSTRG.26713.1  | 1712  | noncoding | -       |
| MSTRG.26722.2  | 5158  | noncoding | -       |
| MSTRG.26722.3  | 3959  | coding    | PF15961 |
| MSTRG.26722.4  | 2091  | coding    | PF15961 |
| MSTRG.26725.5  | 6552  | noncoding | -       |
| MSTRG.26725.6  | 5600  | noncoding | -       |
| MSTRG.26725.8  | 7473  | noncoding | -       |
| MSTRG.26726.2  | 4979  | noncoding | -       |
| MSTRG.26726.1  | 761   | noncoding | -       |
| MSTRG.26727.1  | 3312  | noncoding | -       |
| MSTRG.26727.2  | 2825  | noncoding | -       |
| MSTRG.26727.4  | 4725  | noncoding | -       |
| MSTRG.26727.3  | 6225  | noncoding | -       |
| MSTRG.26727.5  | 5053  | noncoding | -       |
| MSTRG.26728.1  | 7643  | noncoding | -       |
| MSTRG.26728.2  | 13009 | noncoding | -       |
| MSTRG.26729.1  | 4199  | noncoding | -       |
| MSTRG.26739.3  | 5892  | coding    | PF00780 |
| MSTRG.26739.4  | 8374  | coding    | PF00780 |
| MSTRG.26739.5  | 6385  | coding    | PF00780 |
| MSTRG.26741.1  | 3175  | noncoding | -       |
| MSTRG.26744.1  | 3671  | coding    | PF06046 |
| MSTRG.26744.4  | 4193  | coding    | PF06046 |
| MSTRG.26742.2  | 1350  | coding    | PF00071 |
| MSTRG.26742.3  | 1564  | coding    | PF00071 |
| MSTRG.26748.1  | 6922  | noncoding | -       |
| MSTRG.26749.1  | 2172  | coding    | PF01873 |
| MSTRG.26749.2  | 2322  | coding    | PF01873 |
| MSTRG.26751.1  | 3083  | coding    | PF00069 |
| MSTRG.26751.4  | 599   | noncoding | -       |
| MSTRG.26751.6  | 3999  | noncoding | -       |
| MSTRG.26751.5  | 6493  | coding    | PF00069 |
| MSTRG.26751.7  | 2733  | coding    | PF00069 |
| MSTRG.26751.3  | 2753  | coding    | PF00069 |
| MSTRG.26751.8  | 7139  | noncoding | -       |
| MSTRG.26753.1  | 9522  | noncoding | -       |
| MSTRG.26751.9  | 9230  | coding    | PF00069 |
| MSTRG.26754.1  | 3635  | noncoding | -       |
| MSTRG.26757.2  | 1724  | coding    | PF00217 |
| MSTRG.26773.20 | 2750  | noncoding | -       |
| MSTRG.26774.2  | 2517  | noncoding | -       |
| MSTRG.26776.1  | 1291  | noncoding | -       |
| MSTRG.26777.2  | 4830  | coding    | PF12796 |
| MSTRG.26777.3  | 4222  | coding    | PF12796 |
| MSTRG.26765.1  | 383   | noncoding | -       |
| MSTRG.26770.1  | 1206  | noncoding | -       |

|               |       |           |         |
|---------------|-------|-----------|---------|
| MSTRG.26770.2 | 1289  | noncoding | -       |
| MSTRG.26790.1 | 2479  | coding    | PF06367 |
| MSTRG.26790.3 | 4705  | noncoding | -       |
| MSTRG.26788.2 | 649   | coding    | PF05458 |
| MSTRG.26786.1 | 2795  | noncoding | -       |
| MSTRG.26792.3 | 6502  | coding    | PF15308 |
| MSTRG.26792.4 | 6376  | coding    | PF15308 |
| MSTRG.26793.2 | 11611 | noncoding | -       |
| MSTRG.26793.3 | 11569 | noncoding | -       |
| MSTRG.26795.2 | 1252  | coding    | PF15045 |
| MSTRG.26795.3 | 1381  | coding    | PF15045 |
| MSTRG.26796.1 | 3648  | coding    | PF06031 |
| MSTRG.26796.2 | 2195  | coding    | PF06031 |
| MSTRG.26796.3 | 2100  | coding    | PF06031 |
| MSTRG.26798.2 | 7218  | noncoding | -       |
| MSTRG.26803.3 | 5115  | coding    | PF10254 |
| MSTRG.26804.1 | 1397  | noncoding | -       |
| MSTRG.26805.1 | 949   | coding    | PF10254 |
| MSTRG.26806.7 | 2089  | noncoding | -       |
| MSTRG.26806.8 | 2130  | noncoding | -       |
| MSTRG.26806.4 | 1916  | noncoding | -       |
| MSTRG.26806.5 | 8957  | noncoding | -       |
| MSTRG.26808.1 | 1283  | coding    | PF00412 |
| MSTRG.26808.2 | 1375  | coding    | PF00412 |
| MSTRG.26821.1 | 3340  | coding    | PF14955 |
| MSTRG.26821.3 | 824   | coding    | PF14955 |
| MSTRG.26821.4 | 1362  | coding    | PF14955 |
| MSTRG.26821.5 | 1531  | coding    | PF14955 |
| MSTRG.26821.6 | 831   | coding    | PF14955 |
| MSTRG.26830.1 | 2762  | noncoding | -       |
| MSTRG.26830.2 | 1895  | noncoding | -       |
| MSTRG.26830.3 | 3920  | coding    | PF00078 |
| MSTRG.26828.2 | 10021 | coding    | PF07714 |
| MSTRG.26835.2 | 612   | noncoding | -       |
| MSTRG.26836.2 | 4066  | coding    | PF00069 |
| MSTRG.26836.3 | 1061  | noncoding | -       |
| MSTRG.26837.2 | 7391  | coding    | PF00955 |
| MSTRG.26837.4 | 4305  | coding    | PF00955 |
| MSTRG.26837.5 | 2530  | coding    | PF07565 |
| MSTRG.26841.1 | 2359  | noncoding | -       |
| MSTRG.26843.2 | 5441  | coding    | PF12845 |
| MSTRG.26844.1 | 872   | noncoding | -       |
| MSTRG.26845.1 | 2105  | noncoding | -       |
| MSTRG.26853.1 | 5206  | coding    | PF02994 |
| MSTRG.26838.1 | 891   | noncoding | -       |
| MSTRG.26855.1 | 635   | noncoding | -       |
| MSTRG.26856.1 | 561   | noncoding | -       |
| MSTRG.26863.4 | 1795  | noncoding | -       |
| MSTRG.26863.5 | 7534  | coding    | PF00076 |
| MSTRG.26864.1 | 2875  | noncoding | -       |
| MSTRG.26865.1 | 6081  | noncoding | -       |
| MSTRG.26866.1 | 2174  | noncoding | -       |
| MSTRG.26867.1 | 5904  | noncoding | -       |
| MSTRG.26868.1 | 2593  | noncoding | -       |

|                |       |           |         |
|----------------|-------|-----------|---------|
| MSTRG.26868.2  | 16993 | noncoding | -       |
| MSTRG.26868.3  | 7457  | noncoding | -       |
| MSTRG.26870.1  | 1038  | noncoding | -       |
| MSTRG.26858.1  | 236   | noncoding | -       |
| MSTRG.26861.1  | 469   | noncoding | -       |
| MSTRG.26861.2  | 832   | noncoding | -       |
| MSTRG.26889.8  | 3603  | coding    | PF01237 |
| MSTRG.26889.9  | 3044  | coding    | PF01237 |
| MSTRG.26889.4  | 2618  | coding    | PF01237 |
| MSTRG.26889.7  | 2869  | coding    | PF01237 |
| MSTRG.26889.6  | 3448  | coding    | PF01237 |
| MSTRG.26889.5  | 7039  | coding    | PF01237 |
| MSTRG.26889.3  | 7520  | coding    | PF01237 |
| MSTRG.26889.2  | 5356  | coding    | PF01237 |
| MSTRG.26889.10 | 1278  | noncoding | -       |
| MSTRG.26889.11 | 1574  | noncoding | -       |
| MSTRG.26890.1  | 794   | noncoding | -       |
| MSTRG.26889.12 | 2361  | noncoding | -       |
| MSTRG.26891.1  | 11176 | noncoding | -       |
| MSTRG.26892.1  | 1256  | noncoding | -       |
| MSTRG.26894.1  | 4400  | noncoding | -       |
| MSTRG.26879.2  | 3704  | coding    | PF07479 |
| MSTRG.26879.3  | 4626  | coding    | PF07479 |
| MSTRG.26880.2  | 10402 | noncoding | -       |
| MSTRG.26898.1  | 2319  | noncoding | -       |
| MSTRG.26903.2  | 2460  | noncoding | -       |
| MSTRG.26904.1  | 733   | noncoding | -       |
| MSTRG.26902.1  | 4022  | coding    | PF00630 |
| MSTRG.26910.3  | 918   | noncoding | -       |
| MSTRG.26910.4  | 1357  | noncoding | -       |
| MSTRG.26910.5  | 920   | noncoding | -       |
| MSTRG.26919.8  | 5194  | noncoding | -       |
| MSTRG.26919.5  | 7384  | coding    | PF12348 |
| MSTRG.26919.1  | 6800  | coding    | PF12348 |
| MSTRG.26919.2  | 6803  | coding    | PF12348 |
| MSTRG.26919.3  | 6692  | coding    | PF12348 |
| MSTRG.26919.7  | 6500  | coding    | PF12348 |
| MSTRG.26919.9  | 6680  | coding    | PF12348 |
| MSTRG.26919.10 | 6360  | coding    | PF12348 |
| MSTRG.26920.1  | 1263  | noncoding | -       |
| MSTRG.26932.1  | 2056  | coding    | PF09738 |
| MSTRG.26932.4  | 2425  | coding    | PF09738 |
| MSTRG.26932.5  | 2619  | coding    | PF09738 |
| MSTRG.26932.7  | 3203  | coding    | PF09738 |
| MSTRG.26932.6  | 3030  | coding    | PF09738 |
| MSTRG.26932.8  | 2229  | coding    | PF09738 |
| MSTRG.26932.9  | 2684  | coding    | PF09738 |
| MSTRG.26932.10 | 2101  | coding    | PF09738 |
| MSTRG.26933.3  | 2508  | coding    | PF16413 |
| MSTRG.26937.2  | 10567 | noncoding | -       |
| MSTRG.26937.5  | 10584 | noncoding | -       |
| MSTRG.26929.1  | 3108  | coding    | PF00069 |
| MSTRG.26929.2  | 3435  | coding    | PF00069 |
| MSTRG.26930.1  | 1055  | noncoding | -       |

|                  |       |           |         |
|------------------|-------|-----------|---------|
| MSTRG. 26941. 9  | 1849  | noncoding | —       |
| MSTRG. 26941. 8  | 7469  | noncoding | —       |
| MSTRG. 26941. 10 | 7628  | noncoding | —       |
| MSTRG. 26941. 11 | 7565  | noncoding | —       |
| MSTRG. 26941. 13 | 8164  | noncoding | —       |
| MSTRG. 26941. 14 | 2065  | noncoding | —       |
| MSTRG. 26941. 15 | 2945  | noncoding | —       |
| MSTRG. 26942. 1  | 5669  | coding    | PF03031 |
| MSTRG. 26943. 1  | 7969  | noncoding | —       |
| MSTRG. 26942. 3  | 4697  | coding    | PF03031 |
| MSTRG. 26945. 1  | 3118  | coding    | PF00388 |
| MSTRG. 26944. 11 | 2269  | noncoding | —       |
| MSTRG. 26953. 3  | 3517  | coding    | PF00069 |
| MSTRG. 26953. 2  | 10041 | coding    | PF00069 |
| MSTRG. 26954. 1  | 2264  | noncoding | —       |
| MSTRG. 26955. 2  | 3033  | noncoding | —       |
| MSTRG. 26955. 1  | 3351  | noncoding | —       |
| MSTRG. 26955. 3  | 1817  | noncoding | —       |
| MSTRG. 26955. 5  | 2049  | noncoding | —       |
| MSTRG. 26957. 1  | 9652  | noncoding | —       |
| MSTRG. 26962. 1  | 331   | noncoding | —       |
| MSTRG. 26974. 1  | 4316  | noncoding | —       |
| MSTRG. 26988. 1  | 9158  | noncoding | —       |
| MSTRG. 26988. 2  | 1126  | noncoding | —       |
| MSTRG. 26990. 1  | 4178  | coding    | PF01352 |
| MSTRG. 26990. 2  | 4062  | coding    | PF01352 |
| MSTRG. 26990. 3  | 4117  | coding    | PF01352 |
| MSTRG. 26994. 1  | 3115  | noncoding | —       |
| MSTRG. 26990. 4  | 5581  | coding    | PF01352 |
| MSTRG. 26990. 6  | 779   | coding    | PF01352 |
| MSTRG. 26990. 5  | 4722  | coding    | PF01352 |
| MSTRG. 26997. 1  | 1156  | coding    | PF00118 |
| MSTRG. 26998. 1  | 488   | noncoding | —       |
| MSTRG. 27003. 4  | 3064  | noncoding | —       |
| MSTRG. 27006. 6  | 1098  | noncoding | —       |
| MSTRG. 27006. 8  | 995   | noncoding | —       |
| MSTRG. 27006. 9  | 1073  | noncoding | —       |
| MSTRG. 27006. 7  | 1148  | noncoding | —       |
| MSTRG. 27006. 5  | 1600  | noncoding | —       |
| MSTRG. 27006. 4  | 1738  | noncoding | —       |
| MSTRG. 27006. 2  | 4422  | coding    | PF00069 |
| MSTRG. 27007. 1  | 1886  | noncoding | —       |
| MSTRG. 27008. 1  | 884   | noncoding | —       |
| MSTRG. 27011. 1  | 727   | noncoding | —       |
| MSTRG. 27002. 4  | 5211  | coding    | PF04849 |
| MSTRG. 27014. 1  | 3662  | noncoding | —       |
| MSTRG. 27017. 6  | 7266  | coding    | PF00160 |
| MSTRG. 27017. 5  | 3106  | coding    | PF00160 |
| MSTRG. 27017. 7  | 6089  | coding    | PF00160 |
| MSTRG. 27018. 1  | 3262  | noncoding | —       |
| MSTRG. 27017. 9  | 6875  | coding    | PF00160 |
| MSTRG. 27017. 10 | 2286  | noncoding | —       |
| MSTRG. 27017. 11 | 2127  | noncoding | —       |
| MSTRG. 27012. 3  | 5673  | coding    | PF00651 |

|                |       |           |         |
|----------------|-------|-----------|---------|
| MSTRG.27012.2  | 5794  | coding    | PF00651 |
| MSTRG.27019.2  | 711   | noncoding | —       |
| MSTRG.27021.2  | 1125  | coding    | PF04588 |
| MSTRG.27023.1  | 2530  | noncoding | —       |
| MSTRG.27027.1  | 460   | noncoding | —       |
| MSTRG.27027.2  | 361   | noncoding | —       |
| MSTRG.27029.1  | 400   | noncoding | —       |
| MSTRG.27031.2  | 2498  | noncoding | —       |
| MSTRG.27035.4  | 797   | noncoding | —       |
| MSTRG.27035.6  | 1279  | noncoding | —       |
| MSTRG.27035.3  | 3025  | coding    | PF04547 |
| MSTRG.27035.5  | 2810  | coding    | PF04547 |
| MSTRG.27035.7  | 2186  | noncoding | —       |
| MSTRG.27038.2  | 2264  | coding    | PF00561 |
| MSTRG.27038.3  | 2028  | coding    | PF00561 |
| MSTRG.27038.4  | 1879  | coding    | PF00561 |
| MSTRG.27038.5  | 2109  | noncoding | —       |
| MSTRG.27039.1  | 744   | noncoding | —       |
| MSTRG.27039.2  | 634   | noncoding | —       |
| MSTRG.27069.1  | 3125  | noncoding | —       |
| MSTRG.27069.2  | 12338 | noncoding | —       |
| MSTRG.27069.3  | 3801  | noncoding | —       |
| MSTRG.27042.2  | 3301  | coding    | PF14688 |
| MSTRG.27043.1  | 1407  | noncoding | —       |
| MSTRG.27045.4  | 7059  | noncoding | —       |
| MSTRG.27045.5  | 5385  | noncoding | —       |
| MSTRG.27045.6  | 3909  | noncoding | —       |
| MSTRG.27045.7  | 3576  | noncoding | —       |
| MSTRG.27045.8  | 3097  | noncoding | —       |
| MSTRG.27073.2  | 4762  | coding    | PF00225 |
| MSTRG.27073.5  | 5480  | coding    | PF00225 |
| MSTRG.27073.6  | 6330  | coding    | PF00225 |
| MSTRG.27073.7  | 4486  | coding    | PF00225 |
| MSTRG.27073.8  | 4818  | coding    | PF15908 |
| MSTRG.27073.9  | 3514  | coding    | PF15908 |
| MSTRG.27051.1  | 419   | noncoding | —       |
| MSTRG.27078.1  | 1398  | noncoding | —       |
| MSTRG.27083.2  | 1285  | noncoding | —       |
| MSTRG.27083.3  | 1271  | noncoding | —       |
| MSTRG.27085.4  | 4875  | coding    | PF14631 |
| MSTRG.27086.2  | 1412  | coding    | PF01956 |
| MSTRG.27098.1  | 1523  | coding    | PF02017 |
| MSTRG.27098.2  | 1344  | coding    | PF02017 |
| MSTRG.27098.3  | 1389  | coding    | PF02017 |
| MSTRG.27099.1  | 685   | coding    | PF02017 |
| MSTRG.27099.2  | 571   | coding    | PF02017 |
| MSTRG.27101.3  | 3406  | coding    | PF03133 |
| MSTRG.27101.2  | 3655  | coding    | PF03133 |
| MSTRG.27101.1  | 4991  | coding    | PF05856 |
| MSTRG.27101.4  | 3338  | coding    | PF03133 |
| MSTRG.27101.5  | 5057  | coding    | PF05856 |
| MSTRG.27101.10 | 2569  | coding    | PF03133 |
| MSTRG.27101.11 | 2843  | coding    | PF03133 |
| MSTRG.27101.12 | 2834  | coding    | PF03133 |

|                  |       |           |         |
|------------------|-------|-----------|---------|
| MSTRG. 27101. 8  | 2591  | coding    | PF03133 |
| MSTRG. 27101. 14 | 4877  | coding    | PF05856 |
| MSTRG. 27101. 16 | 3275  | coding    | PF03133 |
| MSTRG. 27103. 1  | 388   | noncoding | —       |
| MSTRG. 27104. 1  | 2474  | coding    | PF10198 |
| MSTRG. 27104. 2  | 2345  | coding    | PF10198 |
| MSTRG. 27104. 3  | 2665  | coding    | PF10198 |
| MSTRG. 27104. 4  | 2607  | coding    | PF10198 |
| MSTRG. 27104. 5  | 3682  | coding    | PF10198 |
| MSTRG. 27104. 6  | 2655  | coding    | PF10198 |
| MSTRG. 27101. 17 | 2177  | coding    | PF05856 |
| MSTRG. 27091. 2  | 1386  | coding    | PF07934 |
| MSTRG. 27092. 1  | 1714  | noncoding | —       |
| MSTRG. 27092. 2  | 4639  | noncoding | —       |
| MSTRG. 27092. 3  | 1646  | noncoding | —       |
| MSTRG. 27092. 4  | 2467  | noncoding | —       |
| MSTRG. 27092. 5  | 10772 | noncoding | —       |
| MSTRG. 27092. 6  | 1754  | noncoding | —       |
| MSTRG. 27094. 1  | 603   | coding    | PF07002 |
| MSTRG. 27092. 7  | 6301  | noncoding | —       |
| MSTRG. 27114. 1  | 7032  | noncoding | —       |
| MSTRG. 27118. 1  | 2218  | noncoding | —       |
| MSTRG. 27118. 2  | 1548  | noncoding | —       |
| MSTRG. 27119. 1  | 28383 | noncoding | —       |
| MSTRG. 27119. 2  | 10814 | noncoding | —       |
| MSTRG. 27118. 3  | 2603  | noncoding | —       |
| MSTRG. 27118. 4  | 28225 | noncoding | —       |
| MSTRG. 27123. 1  | 2253  | noncoding | —       |
| MSTRG. 27124. 2  | 3816  | coding    | PF00620 |
| MSTRG. 27124. 5  | 5672  | noncoding | —       |
| MSTRG. 27125. 1  | 7874  | noncoding | —       |
| MSTRG. 27124. 6  | 8970  | coding    | PF00620 |
| MSTRG. 27124. 7  | 2288  | noncoding | —       |
| MSTRG. 27106. 1  | 6759  | noncoding | —       |
| MSTRG. 27109. 1  | 3750  | noncoding | —       |
| MSTRG. 27129. 1  | 593   | noncoding | —       |
| MSTRG. 27143. 1  | 288   | noncoding | —       |
| MSTRG. 27144. 1  | 1862  | noncoding | —       |
| MSTRG. 27150. 1  | 13749 | noncoding | —       |
| MSTRG. 27156. 1  | 802   | coding    | PF03781 |
| MSTRG. 27157. 2  | 1628  | coding    | PF00856 |
| MSTRG. 27179. 1  | 2263  | noncoding | —       |
| MSTRG. 27191. 1  | 2636  | noncoding | —       |
| MSTRG. 27192. 1  | 6349  | noncoding | —       |
| MSTRG. 27192. 3  | 2724  | coding    | PF01743 |
| MSTRG. 27192. 2  | 2330  | coding    | PF01743 |
| MSTRG. 27194. 1  | 992   | noncoding | —       |
| MSTRG. 27198. 1  | 1462  | coding    | PF00041 |
| MSTRG. 27202. 5  | 7854  | coding    | PF13882 |
| MSTRG. 27217. 1  | 2791  | noncoding | —       |
| MSTRG. 27217. 2  | 2658  | noncoding | —       |
| MSTRG. 27212. 1  | 950   | noncoding | —       |
| MSTRG. 27221. 2  | 8526  | noncoding | —       |
| MSTRG. 27222. 1  | 7667  | noncoding | —       |

|                  |       |           |         |
|------------------|-------|-----------|---------|
| MSTRG. 27223. 1  | 1958  | noncoding | –       |
| MSTRG. 27226. 1  | 3178  | coding    | PF09184 |
| MSTRG. 27226. 4  | 1536  | coding    | PF09184 |
| MSTRG. 27226. 5  | 1970  | coding    | PF09184 |
| MSTRG. 27230. 2  | 1130  | noncoding | –       |
| MSTRG. 27230. 4  | 848   | noncoding | –       |
| MSTRG. 27230. 9  | 17853 | noncoding | –       |
| MSTRG. 27230. 16 | 10102 | noncoding | –       |
| MSTRG. 27230. 17 | 3250  | noncoding | –       |
| MSTRG. 27239. 1  | 8164  | noncoding | –       |
| MSTRG. 27239. 2  | 1976  | noncoding | –       |
| MSTRG. 27282. 1  | 2577  | coding    | PF06607 |
| MSTRG. 27282. 3  | 6533  | coding    | PF06607 |
| MSTRG. 27282. 11 | 7752  | noncoding | –       |
| MSTRG. 27282. 10 | 15051 | noncoding | –       |
| MSTRG. 27282. 12 | 7715  | noncoding | –       |
| MSTRG. 27282. 14 | 5520  | noncoding | –       |
| MSTRG. 27282. 15 | 7631  | noncoding | –       |
| MSTRG. 27285. 1  | 25719 | coding    | PF00078 |
| MSTRG. 27282. 16 | 1301  | coding    | PF06607 |
| MSTRG. 27282. 20 | 2124  | coding    | PF06607 |
| MSTRG. 27282. 21 | 7448  | coding    | PF06607 |
| MSTRG. 27282. 18 | 6457  | coding    | PF01652 |
| MSTRG. 27288. 1  | 1262  | coding    | PF00078 |
| MSTRG. 27291. 1  | 3885  | coding    | PF16159 |
| MSTRG. 27291. 2  | 2177  | noncoding | –       |
| MSTRG. 27292. 1  | 3200  | noncoding | –       |
| MSTRG. 27293. 1  | 1339  | noncoding | –       |
| MSTRG. 27291. 7  | 2669  | coding    | PF16159 |
| MSTRG. 27291. 8  | 2654  | coding    | PF16159 |
| MSTRG. 27247. 3  | 975   | noncoding | –       |
| MSTRG. 27247. 2  | 899   | noncoding | –       |
| MSTRG. 27248. 1  | 1421  | coding    | PF00899 |
| MSTRG. 27250. 1  | 3336  | noncoding | –       |
| MSTRG. 27251. 1  | 2096  | noncoding | –       |
| MSTRG. 27255. 2  | 3016  | coding    | PF08442 |
| MSTRG. 27256. 1  | 1233  | noncoding | –       |
| MSTRG. 27263. 1  | 1574  | noncoding | –       |
| MSTRG. 27264. 1  | 3442  | noncoding | –       |
| MSTRG. 27263. 2  | 1435  | noncoding | –       |
| MSTRG. 27263. 3  | 4661  | coding    | PF07679 |
| MSTRG. 27268. 1  | 4142  | coding    | PF02994 |
| MSTRG. 27272. 1  | 2533  | noncoding | –       |
| MSTRG. 27276. 1  | 5461  | noncoding | –       |
| MSTRG. 27275. 2  | 6367  | noncoding | –       |
| MSTRG. 27304. 3  | 4010  | noncoding | –       |
| MSTRG. 27305. 1  | 57734 | noncoding | –       |
| MSTRG. 27305. 2  | 16087 | noncoding | –       |
| MSTRG. 27305. 3  | 9143  | noncoding | –       |
| MSTRG. 27305. 4  | 8536  | noncoding | –       |
| MSTRG. 27305. 5  | 32178 | noncoding | –       |
| MSTRG. 27305. 6  | 6409  | noncoding | –       |
| MSTRG. 27304. 6  | 6100  | noncoding | –       |
| MSTRG. 27304. 7  | 17641 | noncoding | –       |



|                  |       |           |         |
|------------------|-------|-----------|---------|
| MSTRG. 27304. 8  | 20421 | coding    | PF00078 |
| MSTRG. 27304. 9  | 20171 | coding    | PF00078 |
| MSTRG. 27304. 10 | 8477  | coding    | PF16666 |
| MSTRG. 27304. 11 | 20758 | coding    | PF16666 |
| MSTRG. 27304. 12 | 5233  | noncoding | —       |
| MSTRG. 27307. 1  | 6486  | noncoding | —       |
| MSTRG. 27304. 13 | 7729  | noncoding | —       |
| MSTRG. 27308. 1  | 10288 | noncoding | —       |
| MSTRG. 27308. 2  | 5677  | noncoding | —       |
| MSTRG. 27304. 14 | 1955  | noncoding | —       |
| MSTRG. 27309. 1  | 8059  | noncoding | —       |
| MSTRG. 27309. 2  | 8394  | noncoding | —       |
| MSTRG. 27310. 1  | 915   | noncoding | —       |
| MSTRG. 27311. 1  | 692   | noncoding | —       |
| MSTRG. 27277. 1  | 873   | noncoding | —       |
| MSTRG. 27278. 1  | 3276  | coding    | PF02093 |
| MSTRG. 27300. 3  | 9520  | coding    | PF05986 |
| MSTRG. 27300. 4  | 4749  | coding    | PF05986 |
| MSTRG. 27300. 5  | 8515  | coding    | PF08685 |
| MSTRG. 27302. 1  | 3268  | noncoding | —       |
| MSTRG. 27303. 5  | 10722 | noncoding | —       |
| MSTRG. 27312. 1  | 1436  | coding    | PF10602 |
| MSTRG. 27314. 2  | 4999  | coding    | PF08313 |
| MSTRG. 27314. 3  | 400   | noncoding | —       |
| MSTRG. 27329. 1  | 16212 | noncoding | —       |
| MSTRG. 27329. 2  | 4998  | noncoding | —       |
| MSTRG. 27328. 4  | 2138  | noncoding | —       |
| MSTRG. 27330. 1  | 7332  | noncoding | —       |
| MSTRG. 27368. 2  | 594   | noncoding | —       |
| MSTRG. 27368. 3  | 526   | noncoding | —       |
| MSTRG. 27368. 4  | 20866 | coding    | PF02994 |
| MSTRG. 27368. 5  | 1842  | coding    | PF01230 |
| MSTRG. 27368. 6  | 14287 | noncoding | —       |
| MSTRG. 27370. 1  | 5241  | noncoding | —       |
| MSTRG. 27368. 7  | 12502 | noncoding | —       |
| MSTRG. 27373. 1  | 12296 | noncoding | —       |
| MSTRG. 27337. 1  | 869   | noncoding | —       |
| MSTRG. 27338. 3  | 2631  | noncoding | —       |
| MSTRG. 27338. 4  | 2888  | noncoding | —       |
| MSTRG. 27339. 1  | 2449  | noncoding | —       |
| MSTRG. 27340. 1  | 8953  | noncoding | —       |
| MSTRG. 27343. 3  | 7466  | coding    | PF06625 |
| MSTRG. 27343. 4  | 7393  | coding    | PF06625 |
| MSTRG. 27343. 6  | 2961  | coding    | PF06625 |
| MSTRG. 27343. 8  | 8850  | coding    | PF06625 |
| MSTRG. 27359. 4  | 2280  | noncoding | —       |
| MSTRG. 27362. 3  | 3626  | noncoding | —       |
| MSTRG. 27391. 4  | 4063  | noncoding | —       |
| MSTRG. 27391. 2  | 3705  | noncoding | —       |
| MSTRG. 27391. 7  | 4094  | noncoding | —       |
| MSTRG. 27391. 8  | 3061  | noncoding | —       |
| MSTRG. 27391. 10 | 2457  | noncoding | —       |
| MSTRG. 27391. 9  | 3897  | coding    | PF00498 |
| MSTRG. 27393. 3  | 2074  | noncoding | —       |

|                  |       |           |         |
|------------------|-------|-----------|---------|
| MSTRG. 27393. 4  | 3085  | noncoding | -       |
| MSTRG. 27400. 3  | 10824 | coding    | PF03028 |
| MSTRG. 27400. 4  | 3804  | coding    | PF03028 |
| MSTRG. 27401. 1  | 2447  | coding    | PF16746 |
| MSTRG. 27401. 2  | 3599  | coding    | PF16746 |
| MSTRG. 27401. 3  | 3028  | coding    | PF16746 |
| MSTRG. 27401. 4  | 6109  | coding    | PF16746 |
| MSTRG. 27404. 1  | 1277  | coding    | PF00046 |
| MSTRG. 27411. 2  | 8317  | noncoding | -       |
| MSTRG. 27412. 1  | 1784  | noncoding | -       |
| MSTRG. 27411. 3  | 3199  | coding    | PF00621 |
| MSTRG. 27413. 1  | 5844  | noncoding | -       |
| MSTRG. 27413. 2  | 12636 | noncoding | -       |
| MSTRG. 27413. 3  | 12713 | noncoding | -       |
| MSTRG. 27411. 5  | 4547  | coding    | PF00621 |
| MSTRG. 27378. 6  | 973   | noncoding | -       |
| MSTRG. 27378. 7  | 4668  | noncoding | -       |
| MSTRG. 27378. 8  | 8056  | noncoding | -       |
| MSTRG. 27378. 9  | 4764  | noncoding | -       |
| MSTRG. 27387. 1  | 665   | noncoding | -       |
| MSTRG. 27387. 2  | 502   | noncoding | -       |
| MSTRG. 27387. 3  | 610   | noncoding | -       |
| MSTRG. 27387. 4  | 261   | noncoding | -       |
| MSTRG. 27387. 5  | 259   | noncoding | -       |
| MSTRG. 27387. 6  | 264   | noncoding | -       |
| MSTRG. 27387. 7  | 946   | noncoding | -       |
| MSTRG. 27387. 8  | 826   | noncoding | -       |
| MSTRG. 27387. 9  | 261   | noncoding | -       |
| MSTRG. 27387. 10 | 259   | noncoding | -       |
| MSTRG. 27387. 11 | 364   | noncoding | -       |
| MSTRG. 27420. 1  | 1431  | noncoding | -       |
| MSTRG. 27420. 2  | 3726  | coding    | PF08399 |
| MSTRG. 27431. 1  | 326   | noncoding | -       |
| MSTRG. 27435. 3  | 9905  | coding    | PF00520 |
| MSTRG. 27436. 1  | 2773  | noncoding | -       |
| MSTRG. 27440. 1  | 343   | noncoding | -       |
| MSTRG. 27427. 9  | 2432  | coding    | PF00069 |
| MSTRG. 27427. 8  | 2641  | coding    | PF00069 |
| MSTRG. 27427. 7  | 2579  | coding    | PF00069 |
| MSTRG. 27427. 10 | 2687  | coding    | PF00069 |
| MSTRG. 27427. 11 | 2509  | coding    | PF00069 |
| MSTRG. 27427. 12 | 2485  | coding    | PF00069 |
| MSTRG. 27427. 13 | 2441  | coding    | PF00069 |
| MSTRG. 27428. 2  | 1166  | noncoding | -       |
| MSTRG. 27428. 1  | 912   | noncoding | -       |
| MSTRG. 27428. 3  | 771   | noncoding | -       |
| MSTRG. 27428. 4  | 1004  | noncoding | -       |
| MSTRG. 27445. 2  | 1778  | noncoding | -       |
| MSTRG. 27446. 1  | 1135  | noncoding | -       |
| MSTRG. 27449. 1  | 5388  | noncoding | -       |
| MSTRG. 27454. 3  | 4230  | coding    | PF12140 |
| MSTRG. 27454. 2  | 4424  | coding    | PF12140 |
| MSTRG. 27459. 1  | 1556  | coding    | PF06645 |
| MSTRG. 27459. 2  | 968   | coding    | PF06645 |

|                  |       |           |         |
|------------------|-------|-----------|---------|
| MSTRG. 27458. 8  | 6626  | coding    | PF01501 |
| MSTRG. 27461. 1  | 7612  | coding    | PF01426 |
| MSTRG. 27461. 3  | 7580  | coding    | PF01426 |
| MSTRG. 27461. 5  | 10853 | coding    | PF01426 |
| MSTRG. 27461. 6  | 10688 | coding    | PF01426 |
| MSTRG. 27461. 7  | 8833  | coding    | PF01426 |
| MSTRG. 27461. 10 | 7664  | coding    | PF01426 |
| MSTRG. 27461. 11 | 7430  | coding    | PF01426 |
| MSTRG. 27462. 1  | 599   | coding    | PF15114 |
| MSTRG. 27462. 2  | 583   | coding    | PF15114 |
| MSTRG. 27462. 3  | 1701  | coding    | PF15114 |
| MSTRG. 27457. 3  | 8009  | coding    | PF00193 |
| MSTRG. 27474. 4  | 7045  | coding    | PF00787 |
| MSTRG. 27474. 2  | 8770  | coding    | PF00787 |
| MSTRG. 27474. 6  | 10199 | coding    | PF00787 |
| MSTRG. 27475. 1  | 799   | coding    | PF13499 |
| MSTRG. 27479. 1  | 3429  | coding    | PF01088 |
| MSTRG. 27480. 2  | 13645 | coding    | PF03028 |
| MSTRG. 27480. 1  | 13861 | coding    | PF03028 |
| MSTRG. 27480. 4  | 13401 | coding    | PF03028 |
| MSTRG. 27480. 5  | 2748  | coding    | PF03028 |
| MSTRG. 27480. 6  | 13425 | coding    | PF03028 |
| MSTRG. 27480. 8  | 5737  | coding    | PF03028 |
| MSTRG. 27480. 9  | 9693  | coding    | PF03028 |
| MSTRG. 27480. 7  | 13932 | coding    | PF03028 |
| MSTRG. 27480. 10 | 2154  | coding    | PF13660 |
| MSTRG. 27480. 12 | 2301  | coding    | PF13660 |
| MSTRG. 27463. 1  | 314   | noncoding | –       |
| MSTRG. 27466. 2  | 2421  | noncoding | –       |
| MSTRG. 27466. 3  | 1986  | noncoding | –       |
| MSTRG. 27466. 4  | 2502  | noncoding | –       |
| MSTRG. 27467. 2  | 1607  | coding    | PF00241 |
| MSTRG. 27469. 3  | 2835  | coding    | PF09029 |
| MSTRG. 27471. 2  | 1340  | coding    | PF00400 |
| MSTRG. 27471. 6  | 2137  | coding    | PF00400 |
| MSTRG. 27473. 1  | 701   | noncoding | –       |
| MSTRG. 27471. 7  | 1330  | noncoding | –       |
| MSTRG. 27471. 8  | 8675  | noncoding | –       |
| MSTRG. 27486. 2  | 946   | coding    | PF01779 |
| MSTRG. 27486. 3  | 1044  | coding    | PF01779 |
| MSTRG. 27487. 2  | 2459  | coding    | PF01546 |
| MSTRG. 27489. 4  | 2383  | coding    | PF00013 |
| MSTRG. 27489. 5  | 2856  | coding    | PF00013 |
| MSTRG. 27489. 6  | 1081  | noncoding | –       |
| MSTRG. 27489. 7  | 2127  | coding    | PF00013 |
| MSTRG. 27483. 1  | 1550  | coding    | PF00644 |
| MSTRG. 27507. 2  | 4269  | noncoding | –       |
| MSTRG. 27507. 3  | 1792  | noncoding | –       |
| MSTRG. 27507. 4  | 1549  | noncoding | –       |
| MSTRG. 27507. 5  | 1769  | noncoding | –       |
| MSTRG. 27507. 7  | 2452  | coding    | PF01251 |
| MSTRG. 27507. 8  | 1212  | noncoding | –       |
| MSTRG. 27508. 1  | 702   | noncoding | –       |
| MSTRG. 27510. 1  | 12576 | noncoding | –       |

|                  |       |           |         |
|------------------|-------|-----------|---------|
| MSTRG. 27512. 12 | 1129  | noncoding | -       |
| MSTRG. 27510. 3  | 5621  | noncoding | -       |
| MSTRG. 27510. 4  | 7896  | noncoding | -       |
| MSTRG. 27510. 5  | 7482  | noncoding | -       |
| MSTRG. 27510. 6  | 2779  | noncoding | -       |
| MSTRG. 27514. 1  | 5371  | noncoding | -       |
| MSTRG. 27514. 2  | 5743  | noncoding | -       |
| MSTRG. 27515. 1  | 904   | noncoding | -       |
| MSTRG. 27521. 1  | 8781  | coding    | PF16172 |
| MSTRG. 27521. 2  | 8676  | coding    | PF16172 |
| MSTRG. 27521. 3  | 8808  | coding    | PF16172 |
| MSTRG. 27524. 2  | 3311  | coding    | PF00069 |
| MSTRG. 27526. 1  | 2324  | noncoding | -       |
| MSTRG. 27526. 4  | 1946  | noncoding | -       |
| MSTRG. 27497. 1  | 1630  | noncoding | -       |
| MSTRG. 27499. 2  | 1939  | coding    | PF01630 |
| MSTRG. 27499. 4  | 3618  | coding    | PF01630 |
| MSTRG. 27505. 1  | 4184  | noncoding | -       |
| MSTRG. 27505. 5  | 9971  | noncoding | -       |
| MSTRG. 27502. 1  | 3090  | coding    | PF00022 |
| MSTRG. 27533. 4  | 1843  | coding    | PF03770 |
| MSTRG. 27540. 1  | 3171  | noncoding | -       |
| MSTRG. 27572. 2  | 1881  | noncoding | -       |
| MSTRG. 27573. 4  | 1644  | noncoding | -       |
| MSTRG. 27573. 3  | 2289  | noncoding | -       |
| MSTRG. 27573. 2  | 1789  | coding    | PF15128 |
| MSTRG. 27580. 6  | 2637  | coding    | PF15771 |
| MSTRG. 27580. 7  | 2094  | coding    | PF15771 |
| MSTRG. 27580. 8  | 2437  | coding    | PF15771 |
| MSTRG. 27580. 5  | 2259  | coding    | PF15771 |
| MSTRG. 27580. 9  | 7065  | coding    | PF15771 |
| MSTRG. 27581. 3  | 17085 | coding    | PF15374 |
| MSTRG. 27581. 6  | 3461  | noncoding | -       |
| MSTRG. 27581. 5  | 13149 | coding    | PF15374 |
| MSTRG. 27584. 1  | 4358  | coding    | PF00443 |
| MSTRG. 27584. 10 | 4587  | coding    | PF16602 |
| MSTRG. 27584. 11 | 4818  | coding    | PF00443 |
| MSTRG. 27584. 9  | 5467  | coding    | PF04558 |
| MSTRG. 27584. 12 | 7281  | coding    | PF00749 |
| MSTRG. 27584. 13 | 4731  | coding    | PF00443 |
| MSTRG. 27584. 14 | 4627  | coding    | PF00443 |
| MSTRG. 27584. 15 | 4487  | coding    | PF00443 |
| MSTRG. 27587. 3  | 644   | noncoding | -       |
| MSTRG. 27587. 2  | 1945  | coding    | PF04430 |
| MSTRG. 27588. 4  | 1748  | noncoding | -       |
| MSTRG. 27589. 2  | 4229  | noncoding | -       |
| MSTRG. 27589. 4  | 1889  | noncoding | -       |
| MSTRG. 27590. 5  | 2132  | coding    | PF01485 |
| MSTRG. 27541. 1  | 1086  | noncoding | -       |
| MSTRG. 27541. 2  | 1252  | noncoding | -       |
| MSTRG. 27544. 2  | 1371  | coding    | PF03770 |
| MSTRG. 27544. 3  | 15977 | coding    | PF03770 |
| MSTRG. 27547. 1  | 11928 | coding    | PF00028 |
| MSTRG. 27548. 2  | 2911  | coding    | PF00916 |

|                  |       |           |         |
|------------------|-------|-----------|---------|
| MSTRG. 27550. 1  | 354   | noncoding | -       |
| MSTRG. 27554. 1  | 1651  | noncoding | -       |
| MSTRG. 27555. 1  | 729   | noncoding | -       |
| MSTRG. 27555. 2  | 598   | noncoding | -       |
| MSTRG. 27555. 3  | 532   | noncoding | -       |
| MSTRG. 27556. 1  | 2223  | noncoding | -       |
| MSTRG. 27557. 1  | 3711  | noncoding | -       |
| MSTRG. 27558. 2  | 7161  | coding    | PF08337 |
| MSTRG. 27559. 4  | 998   | coding    | PF00334 |
| MSTRG. 27559. 5  | 1125  | coding    | PF00334 |
| MSTRG. 27560. 1  | 1016  | noncoding | -       |
| MSTRG. 27563. 1  | 7636  | noncoding | -       |
| MSTRG. 27563. 10 | 9780  | noncoding | -       |
| MSTRG. 27563. 9  | 14221 | noncoding | -       |
| MSTRG. 27563. 6  | 19728 | noncoding | -       |
| MSTRG. 27563. 7  | 5622  | noncoding | -       |
| MSTRG. 27563. 8  | 5301  | noncoding | -       |
| MSTRG. 27563. 11 | 8082  | noncoding | -       |
| MSTRG. 27563. 12 | 14728 | noncoding | -       |
| MSTRG. 27563. 13 | 3851  | noncoding | -       |
| MSTRG. 27563. 14 | 701   | noncoding | -       |
| MSTRG. 27563. 15 | 6982  | noncoding | -       |
| MSTRG. 27565. 1  | 5518  | noncoding | -       |
| MSTRG. 27563. 16 | 5885  | noncoding | -       |
| MSTRG. 27563. 17 | 12124 | noncoding | -       |
| MSTRG. 27567. 5  | 3734  | noncoding | -       |
| MSTRG. 27567. 6  | 4046  | noncoding | -       |
| MSTRG. 27569. 2  | 6188  | coding    | PF16496 |
| MSTRG. 27596. 1  | 4625  | coding    | PF12349 |
| MSTRG. 27596. 3  | 4201  | coding    | PF12349 |
| MSTRG. 27596. 4  | 4204  | coding    | PF12349 |
| MSTRG. 27597. 2  | 1446  | noncoding | -       |
| MSTRG. 27617. 2  | 1481  | noncoding | -       |
| MSTRG. 27617. 3  | 2150  | noncoding | -       |
| MSTRG. 27617. 4  | 1809  | noncoding | -       |
| MSTRG. 27620. 8  | 5434  | noncoding | -       |
| MSTRG. 27620. 2  | 8518  | coding    | PF00856 |
| MSTRG. 27620. 3  | 8583  | coding    | PF00856 |
| MSTRG. 27620. 4  | 10612 | coding    | PF00856 |
| MSTRG. 27620. 5  | 10037 | coding    | PF00856 |
| MSTRG. 27620. 6  | 8509  | coding    | PF00856 |
| MSTRG. 27620. 7  | 8521  | coding    | PF00856 |
| MSTRG. 27620. 9  | 10091 | coding    | PF00856 |
| MSTRG. 27620. 10 | 13489 | coding    | PF00856 |
| MSTRG. 27620. 11 | 8033  | coding    | PF00856 |
| MSTRG. 27620. 12 | 2289  | noncoding | -       |
| MSTRG. 27622. 2  | 8649  | coding    | PF02138 |
| MSTRG. 27624. 2  | 1217  | noncoding | -       |
| MSTRG. 27624. 3  | 24976 | coding    | PF08315 |
| MSTRG. 27598. 2  | 2874  | coding    | PF00002 |
| MSTRG. 27598. 3  | 3662  | coding    | PF00002 |
| MSTRG. 27601. 1  | 342   | noncoding | -       |
| MSTRG. 27602. 1  | 1103  | noncoding | -       |
| MSTRG. 27605. 1  | 1116  | coding    | PF00089 |

|                  |      |           |         |
|------------------|------|-----------|---------|
| MSTRG. 27605. 5  | 1467 | coding    | PF00089 |
| MSTRG. 27605. 2  | 1880 | coding    | PF00089 |
| MSTRG. 27605. 4  | 1829 | coding    | PF00089 |
| MSTRG. 27606. 1  | 1136 | coding    | PF00089 |
| MSTRG. 27599. 2  | 1821 | coding    | PF00089 |
| MSTRG. 27630. 1  | 2206 | noncoding | –       |
| MSTRG. 27633. 1  | 2605 | coding    | PF00001 |
| MSTRG. 27626. 1  | 8761 | coding    | PF10168 |
| MSTRG. 27626. 2  | 414  | coding    | PF10168 |
| MSTRG. 27626. 3  | 523  | coding    | PF10168 |
| MSTRG. 27627. 1  | 2598 | noncoding | –       |
| MSTRG. 27628. 1  | 4170 | noncoding | –       |
| MSTRG. 27651. 1  | 3109 | coding    | PF00209 |
| MSTRG. 27651. 2  | 3939 | coding    | PF00209 |
| MSTRG. 27651. 3  | 1751 | coding    | PF00209 |
| MSTRG. 27655. 1  | 5658 | coding    | PF00412 |
| MSTRG. 27655. 2  | 1771 | coding    | PF00412 |
| MSTRG. 27666. 2  | 823  | noncoding | –       |
| MSTRG. 27667. 1  | 1921 | noncoding | –       |
| MSTRG. 27668. 6  | 4141 | coding    | PF01529 |
| MSTRG. 27668. 7  | 3304 | coding    | PF01529 |
| MSTRG. 27668. 8  | 2779 | coding    | PF01529 |
| MSTRG. 27668. 9  | 3682 | coding    | PF01529 |
| MSTRG. 27668. 10 | 2676 | noncoding | –       |
| MSTRG. 27669. 5  | 710  | noncoding | –       |
| MSTRG. 27669. 6  | 1134 | noncoding | –       |
| MSTRG. 27669. 7  | 1588 | noncoding | –       |
| MSTRG. 27669. 8  | 1714 | noncoding | –       |
| MSTRG. 27659. 1  | 573  | noncoding | –       |
| MSTRG. 27673. 1  | 5223 | noncoding | –       |
| MSTRG. 27676. 3  | 2366 | coding    | PF16420 |
| MSTRG. 27676. 4  | 2624 | coding    | PF16420 |
| MSTRG. 27676. 6  | 2349 | coding    | PF16420 |
| MSTRG. 27676. 7  | 2346 | coding    | PF16420 |
| MSTRG. 27676. 8  | 2378 | coding    | PF16420 |
| MSTRG. 27676. 10 | 2750 | coding    | PF16420 |
| MSTRG. 27680. 1  | 6498 | coding    | PF10267 |
| MSTRG. 27680. 3  | 6243 | coding    | PF10267 |
| MSTRG. 27680. 5  | 4957 | noncoding | –       |
| MSTRG. 27680. 4  | 3388 | coding    | PF10267 |
| MSTRG. 27684. 4  | 732  | noncoding | –       |
| MSTRG. 27684. 3  | 845  | noncoding | –       |
| MSTRG. 27684. 2  | 1236 | coding    | PF00538 |
| MSTRG. 27689. 1  | 562  | noncoding | –       |
| MSTRG. 27690. 2  | 616  | noncoding | –       |
| MSTRG. 27695. 1  | 2698 | noncoding | –       |
| MSTRG. 27695. 3  | 1625 | noncoding | –       |
| MSTRG. 27704. 1  | 2779 | noncoding | –       |
| MSTRG. 27706. 1  | 4061 | noncoding | –       |
| MSTRG. 27707. 2  | 4113 | coding    | PF00607 |
| MSTRG. 27707. 1  | 2892 | coding    | PF00517 |
| MSTRG. 27707. 4  | 2717 | coding    | PF00517 |
| MSTRG. 27708. 2  | 593  | noncoding | –       |
| MSTRG. 27708. 3  | 553  | noncoding | –       |

|               |       |           |         |
|---------------|-------|-----------|---------|
| MSTRG.27717.5 | 5718  | noncoding | -       |
| MSTRG.27717.1 | 5849  | noncoding | -       |
| MSTRG.27717.2 | 5769  | noncoding | -       |
| MSTRG.27720.1 | 517   | noncoding | -       |
| MSTRG.27722.1 | 1604  | noncoding | -       |
| MSTRG.27718.2 | 1827  | coding    | PF00595 |
| MSTRG.27719.1 | 1462  | noncoding | -       |
| MSTRG.27724.4 | 5955  | coding    | PF00209 |
| MSTRG.27724.5 | 5604  | coding    | PF00209 |
| MSTRG.27730.2 | 652   | coding    | PF01423 |
| MSTRG.27731.3 | 5376  | coding    | PF10405 |
| MSTRG.27732.2 | 3353  | coding    | PF07787 |
| MSTRG.27725.1 | 577   | noncoding | -       |
| MSTRG.27737.2 | 7787  | noncoding | -       |
| MSTRG.27738.1 | 3556  | noncoding | -       |
| MSTRG.27747.1 | 1720  | noncoding | -       |
| MSTRG.27747.2 | 7226  | coding    | PF16453 |
| MSTRG.27747.3 | 7221  | coding    | PF16453 |
| MSTRG.27747.4 | 7388  | coding    | PF16453 |
| MSTRG.27748.1 | 8388  | noncoding | -       |
| MSTRG.27748.2 | 16981 | noncoding | -       |
| MSTRG.27751.1 | 511   | noncoding | -       |
| MSTRG.27747.5 | 8333  | coding    | PF16453 |
| MSTRG.27752.1 | 492   | noncoding | -       |
| MSTRG.27753.1 | 483   | noncoding | -       |
| MSTRG.27747.6 | 7232  | coding    | PF16453 |
| MSTRG.27747.8 | 6935  | coding    | PF16453 |
| MSTRG.27754.1 | 3724  | noncoding | -       |
| MSTRG.27744.2 | 2182  | coding    | PF02771 |
| MSTRG.27745.1 | 7312  | coding    | PF15084 |
| MSTRG.27745.3 | 4471  | coding    | PF15084 |
| MSTRG.27769.1 | 8995  | noncoding | -       |
| MSTRG.27772.3 | 1614  | coding    | PF02586 |
| MSTRG.27772.4 | 1740  | coding    | PF02586 |
| MSTRG.27772.6 | 1271  | coding    | PF02586 |
| MSTRG.27778.2 | 3893  | noncoding | -       |
| MSTRG.27781.2 | 2664  | coding    | PF04597 |
| MSTRG.27755.1 | 3015  | coding    | PF00320 |
| MSTRG.27757.1 | 1076  | coding    | PF00226 |
| MSTRG.27782.3 | 3303  | coding    | PF12146 |
| MSTRG.27783.1 | 1900  | noncoding | -       |
| MSTRG.27784.1 | 2215  | coding    | PF00651 |
| MSTRG.27784.3 | 2127  | coding    | PF00651 |
| MSTRG.27784.2 | 1739  | coding    | PF00651 |
| MSTRG.27786.1 | 4700  | coding    | PF00493 |
| MSTRG.27793.1 | 622   | noncoding | -       |
| MSTRG.27794.1 | 492   | noncoding | -       |
| MSTRG.27795.1 | 6604  | noncoding | -       |
| MSTRG.27796.4 | 5944  | coding    | PF08337 |
| MSTRG.27798.3 | 1067  | coding    | PF05300 |
| MSTRG.27800.1 | 1549  | noncoding | -       |
| MSTRG.27802.2 | 2424  | coding    | PF07992 |
| MSTRG.27802.3 | 2438  | coding    | PF07992 |
| MSTRG.27802.4 | 3051  | coding    | PF07992 |

|                  |       |           |         |
|------------------|-------|-----------|---------|
| MSTRG. 27802. 5  | 2398  | coding    | PF07992 |
| MSTRG. 27802. 6  | 6452  | coding    | PF07992 |
| MSTRG. 27804. 2  | 686   | noncoding | —       |
| MSTRG. 27804. 3  | 699   | noncoding | —       |
| MSTRG. 27801. 1  | 1916  | coding    | PF01175 |
| MSTRG. 27801. 2  | 1223  | coding    | PF01175 |
| MSTRG. 27807. 2  | 3010  | coding    | PF15909 |
| MSTRG. 27808. 4  | 6668  | noncoding | —       |
| MSTRG. 27810. 2  | 857   | noncoding | —       |
| MSTRG. 27814. 1  | 7588  | noncoding | —       |
| MSTRG. 27814. 4  | 7720  | noncoding | —       |
| MSTRG. 27814. 5  | 7684  | noncoding | —       |
| MSTRG. 27814. 12 | 4373  | noncoding | —       |
| MSTRG. 27814. 14 | 6948  | noncoding | —       |
| MSTRG. 27818. 1  | 1373  | noncoding | —       |
| MSTRG. 27814. 15 | 2506  | noncoding | —       |
| MSTRG. 27814. 16 | 2496  | noncoding | —       |
| MSTRG. 27814. 17 | 2519  | noncoding | —       |
| MSTRG. 27838. 3  | 2210  | coding    | PF04104 |
| MSTRG. 27838. 2  | 2061  | coding    | PF04104 |
| MSTRG. 27838. 4  | 2026  | coding    | PF04104 |
| MSTRG. 27839. 1  | 295   | noncoding | —       |
| MSTRG. 27840. 1  | 7854  | noncoding | —       |
| MSTRG. 27842. 1  | 917   | noncoding | —       |
| MSTRG. 27842. 2  | 661   | noncoding | —       |
| MSTRG. 27846. 1  | 1805  | noncoding | —       |
| MSTRG. 27846. 2  | 7446  | noncoding | —       |
| MSTRG. 27846. 3  | 6689  | noncoding | —       |
| MSTRG. 27846. 4  | 3791  | noncoding | —       |
| MSTRG. 27846. 5  | 6995  | noncoding | —       |
| MSTRG. 27846. 7  | 4021  | noncoding | —       |
| MSTRG. 27846. 9  | 4660  | noncoding | —       |
| MSTRG. 27846. 8  | 6889  | noncoding | —       |
| MSTRG. 27846. 11 | 7042  | noncoding | —       |
| MSTRG. 27846. 12 | 6603  | noncoding | —       |
| MSTRG. 27847. 1  | 4676  | noncoding | —       |
| MSTRG. 27848. 1  | 1235  | noncoding | —       |
| MSTRG. 27846. 13 | 15330 | noncoding | —       |
| MSTRG. 27846. 15 | 5344  | noncoding | —       |
| MSTRG. 27844. 2  | 1683  | noncoding | —       |
| MSTRG. 27884. 3  | 17671 | coding    | PF02187 |
| MSTRG. 27884. 6  | 23452 | coding    | PF02187 |
| MSTRG. 27885. 1  | 4564  | noncoding | —       |
| MSTRG. 27884. 11 | 17097 | coding    | PF02187 |
| MSTRG. 27884. 9  | 17079 | coding    | PF02187 |
| MSTRG. 27884. 8  | 17950 | coding    | PF02187 |
| MSTRG. 27884. 12 | 20201 | coding    | PF02187 |
| MSTRG. 27884. 14 | 22287 | coding    | PF02187 |
| MSTRG. 27884. 15 | 15873 | coding    | PF02187 |
| MSTRG. 27884. 16 | 9728  | coding    | PF02187 |
| MSTRG. 27884. 17 | 8918  | coding    | PF02187 |
| MSTRG. 27884. 18 | 9770  | coding    | PF02187 |
| MSTRG. 27884. 19 | 7774  | coding    | PF02187 |
| MSTRG. 27884. 20 | 4084  | coding    | PF02187 |



|               |       |           |         |
|---------------|-------|-----------|---------|
| MSTRG.27854.1 | 234   | noncoding | -       |
| MSTRG.27852.1 | 908   | coding    | PF03827 |
| MSTRG.27862.1 | 904   | noncoding | -       |
| MSTRG.27863.2 | 2865  | noncoding | -       |
| MSTRG.27864.1 | 707   | noncoding | -       |
| MSTRG.27865.1 | 1877  | noncoding | -       |
| MSTRG.27870.1 | 3064  | coding    | PF00005 |
| MSTRG.27870.3 | 2890  | coding    | PF00005 |
| MSTRG.27870.4 | 2435  | coding    | PF00005 |
| MSTRG.27870.5 | 10828 | coding    | PF02093 |
| MSTRG.27875.2 | 1037  | noncoding | -       |
| MSTRG.27876.1 | 1064  | coding    | PF07654 |
| MSTRG.27878.5 | 4495  | coding    | PF17035 |
| MSTRG.27880.3 | 4885  | coding    | PF01410 |
| MSTRG.27882.2 | 2761  | coding    | PF02535 |
| MSTRG.27882.4 | 668   | coding    | PF00106 |
| MSTRG.27882.3 | 887   | coding    | PF00106 |
| MSTRG.27893.3 | 3797  | coding    | PF00617 |
| MSTRG.27901.7 | 2763  | coding    | PF03344 |
| MSTRG.27901.8 | 2478  | coding    | PF03344 |
| MSTRG.27904.1 | 4257  | noncoding | -       |
| MSTRG.27905.5 | 2557  | coding    | PF00225 |
| MSTRG.27908.4 | 691   | coding    | PF03091 |
| MSTRG.27908.5 | 713   | coding    | PF03091 |
| MSTRG.27909.1 | 4549  | coding    | PF12004 |
| MSTRG.27909.4 | 2853  | coding    | PF12004 |
| MSTRG.27909.3 | 4650  | coding    | PF12004 |
| MSTRG.27909.5 | 2810  | coding    | PF12004 |
| MSTRG.27910.1 | 758   | noncoding | -       |
| MSTRG.27896.1 | 2209  | coding    | PF00452 |
| MSTRG.27896.2 | 2316  | coding    | PF00452 |
| MSTRG.27897.1 | 947   | coding    | PF14836 |
| MSTRG.27897.2 | 846   | coding    | PF14836 |
| MSTRG.27897.5 | 874   | coding    | PF14836 |
| MSTRG.27900.2 | 7295  | noncoding | -       |
| MSTRG.27922.2 | 29322 | noncoding | -       |
| MSTRG.27913.2 | 886   | noncoding | -       |
| MSTRG.27925.1 | 7301  | noncoding | -       |
| MSTRG.27925.3 | 7156  | noncoding | -       |
| MSTRG.27928.1 | 6947  | coding    | PF16158 |
| MSTRG.27934.2 | 5842  | coding    | PF12796 |
| MSTRG.27935.1 | 17159 | noncoding | -       |
| MSTRG.27936.1 | 4645  | noncoding | -       |
| MSTRG.27941.3 | 1898  | coding    | PF05794 |
| MSTRG.27942.1 | 1557  | noncoding | -       |
| MSTRG.27942.4 | 780   | noncoding | -       |
| MSTRG.27942.3 | 1026  | noncoding | -       |
| MSTRG.27942.2 | 1349  | noncoding | -       |
| MSTRG.27943.2 | 4731  | noncoding | -       |
| MSTRG.27943.1 | 4856  | noncoding | -       |
| MSTRG.27943.3 | 4298  | coding    | PF07699 |
| MSTRG.27945.3 | 2563  | noncoding | -       |
| MSTRG.27945.5 | 2772  | noncoding | -       |
| MSTRG.27940.2 | 3076  | coding    | PF00105 |

|                  |       |           |         |
|------------------|-------|-----------|---------|
| MSTRG. 27949. 1  | 2901  | coding    | PF01285 |
| MSTRG. 27949. 2  | 2918  | coding    | PF01285 |
| MSTRG. 27950. 3  | 4194  | coding    | PF00254 |
| MSTRG. 27950. 4  | 3931  | coding    | PF00254 |
| MSTRG. 27951. 1  | 2237  | noncoding | —       |
| MSTRG. 27950. 6  | 5000  | coding    | PF00254 |
| MSTRG. 27952. 1  | 5464  | noncoding | —       |
| MSTRG. 27953. 1  | 5733  | noncoding | —       |
| MSTRG. 27955. 1  | 1333  | noncoding | —       |
| MSTRG. 27954. 5  | 2331  | noncoding | —       |
| MSTRG. 27956. 1  | 4376  | noncoding | —       |
| MSTRG. 27956. 5  | 2300  | coding    | PF00069 |
| MSTRG. 27957. 4  | 2306  | noncoding | —       |
| MSTRG. 27957. 3  | 3089  | noncoding | —       |
| MSTRG. 27957. 5  | 3086  | noncoding | —       |
| MSTRG. 27957. 6  | 3135  | noncoding | —       |
| MSTRG. 27957. 7  | 3002  | noncoding | —       |
| MSTRG. 27957. 8  | 3226  | noncoding | —       |
| MSTRG. 27957. 9  | 3142  | noncoding | —       |
| MSTRG. 27957. 10 | 2486  | noncoding | —       |
| MSTRG. 27959. 1  | 4215  | noncoding | —       |
| MSTRG. 27960. 1  | 5448  | noncoding | —       |
| MSTRG. 27960. 2  | 1509  | noncoding | —       |
| MSTRG. 27961. 1  | 1908  | noncoding | —       |
| MSTRG. 27963. 2  | 5748  | coding    | PF13832 |
| MSTRG. 27967. 4  | 4858  | coding    | PF16017 |
| MSTRG. 27967. 5  | 4942  | coding    | PF16017 |
| MSTRG. 27967. 6  | 5531  | coding    | PF16017 |
| MSTRG. 27967. 7  | 5487  | coding    | PF16017 |
| MSTRG. 27968. 3  | 3082  | coding    | PF00069 |
| MSTRG. 27968. 4  | 5778  | noncoding | —       |
| MSTRG. 27964. 2  | 3834  | coding    | PF00076 |
| MSTRG. 27969. 3  | 1112  | coding    | PF00900 |
| MSTRG. 27969. 4  | 1167  | coding    | PF00900 |
| MSTRG. 27970. 2  | 1565  | coding    | PF02234 |
| MSTRG. 27975. 5  | 3194  | noncoding | —       |
| MSTRG. 27975. 4  | 1288  | noncoding | —       |
| MSTRG. 27975. 7  | 5769  | noncoding | —       |
| MSTRG. 27983. 2  | 1241  | coding    | PF15049 |
| MSTRG. 27985. 1  | 1159  | noncoding | —       |
| MSTRG. 27988. 3  | 2290  | noncoding | —       |
| MSTRG. 27995. 1  | 3523  | noncoding | —       |
| MSTRG. 27995. 3  | 4944  | noncoding | —       |
| MSTRG. 27996. 1  | 15075 | coding    | PF01359 |
| MSTRG. 27996. 2  | 13288 | coding    | PF01359 |
| MSTRG. 27997. 1  | 8904  | noncoding | —       |
| MSTRG. 28003. 6  | 2855  | coding    | PF00651 |
| MSTRG. 28004. 1  | 302   | noncoding | —       |
| MSTRG. 28005. 1  | 16691 | noncoding | —       |
| MSTRG. 28005. 2  | 16701 | noncoding | —       |
| MSTRG. 28003. 7  | 8408  | coding    | PF00651 |
| MSTRG. 28003. 8  | 7743  | coding    | PF00651 |
| MSTRG. 28003. 9  | 3899  | noncoding | —       |
| MSTRG. 28007. 2  | 916   | noncoding | —       |

|               |       |           |         |
|---------------|-------|-----------|---------|
| MSTRG.28008.1 | 14854 | coding    | PF03028 |
| MSTRG.28008.2 | 14845 | coding    | PF03028 |
| MSTRG.28008.3 | 11285 | coding    | PF08385 |
| MSTRG.28009.1 | 1026  | noncoding | —       |
| MSTRG.28011.1 | 232   | noncoding | —       |
| MSTRG.28012.5 | 6731  | coding    | PF02181 |
| MSTRG.28012.4 | 7544  | coding    | PF02181 |
| MSTRG.28013.3 | 11023 | coding    | PF01967 |
| MSTRG.28018.2 | 9463  | noncoding | —       |
| MSTRG.28033.6 | 1907  | coding    | PF02045 |
| MSTRG.28033.8 | 2039  | coding    | PF02045 |
| MSTRG.28033.5 | 1839  | coding    | PF02045 |
| MSTRG.28033.7 | 1821  | coding    | PF02045 |
| MSTRG.28034.2 | 4339  | noncoding | —       |
| MSTRG.28034.4 | 4248  | noncoding | —       |
| MSTRG.28034.9 | 4080  | noncoding | —       |
| MSTRG.28034.5 | 3656  | noncoding | —       |
| MSTRG.28034.6 | 3573  | noncoding | —       |
| MSTRG.28025.1 | 2498  | noncoding | —       |
| MSTRG.28024.4 | 3284  | coding    | PF16159 |
| MSTRG.28027.1 | 505   | coding    | PF16159 |
| MSTRG.28027.2 | 509   | coding    | PF16159 |
| MSTRG.28040.1 | 5493  | coding    | PF00443 |
| MSTRG.28040.2 | 6067  | coding    | PF00443 |
| MSTRG.28040.4 | 5162  | coding    | PF00443 |
| MSTRG.28045.3 | 4464  | coding    | PF07524 |
| MSTRG.28035.2 | 1600  | noncoding | —       |
| MSTRG.28055.1 | 5599  | noncoding | —       |
| MSTRG.28058.1 | 4377  | noncoding | —       |
| MSTRG.28059.1 | 792   | noncoding | —       |
| MSTRG.28051.1 | 16919 | coding    | PF15249 |
| MSTRG.28051.4 | 9462  | noncoding | —       |
| MSTRG.28051.7 | 10536 | noncoding | —       |
| MSTRG.28062.1 | 1098  | noncoding | —       |
| MSTRG.28064.1 | 868   | noncoding | —       |
| MSTRG.28070.1 | 6527  | coding    | PF11515 |
| MSTRG.28072.3 | 1192  | coding    | PF03947 |
| MSTRG.28076.1 | 355   | noncoding | —       |
| MSTRG.28075.1 | 911   | noncoding | —       |
| MSTRG.28081.1 | 3653  | coding    | PF00005 |
| MSTRG.28085.6 | 2711  | coding    | PF15453 |
| MSTRG.28091.4 | 5149  | noncoding | —       |
| MSTRG.28091.2 | 3394  | coding    | PF00817 |
| MSTRG.28093.2 | 2665  | noncoding | —       |
| MSTRG.28095.3 | 698   | noncoding | —       |
| MSTRG.28095.2 | 869   | noncoding | —       |
| MSTRG.28097.2 | 778   | noncoding | —       |
| MSTRG.28098.2 | 3168  | coding    | PF00238 |
| MSTRG.28098.1 | 3382  | coding    | PF00238 |
| MSTRG.28098.3 | 1121  | noncoding | —       |
| MSTRG.28099.3 | 2690  | noncoding | —       |
| MSTRG.28100.1 | 2530  | coding    | PF00648 |
| MSTRG.28100.5 | 2514  | coding    | PF00648 |
| MSTRG.28100.6 | 2301  | coding    | PF00648 |

|                 |      |           |         |
|-----------------|------|-----------|---------|
| MSTRG. 28100. 7 | 2652 | coding    | PF00648 |
| MSTRG. 28100. 8 | 2434 | coding    | PF00648 |
| MSTRG. 28105. 5 | 2237 | coding    | PF01733 |
| MSTRG. 28105. 6 | 2133 | coding    | PF01733 |
| MSTRG. 28107. 1 | 3409 | coding    | PF00183 |
| MSTRG. 28109. 3 | 1260 | coding    | PF15160 |
| MSTRG. 28109. 4 | 1202 | coding    | PF15160 |
| MSTRG. 28109. 2 | 1105 | coding    | PF15160 |
| MSTRG. 28109. 5 | 1264 | coding    | PF15160 |
| MSTRG. 28121. 1 | 6396 | noncoding | —       |
| MSTRG. 28122. 1 | 477  | noncoding | —       |
| MSTRG. 28115. 4 | 1353 | noncoding | —       |
| MSTRG. 28114. 2 | 2157 | noncoding | —       |
| MSTRG. 28127. 1 | 464  | noncoding | —       |
| MSTRG. 28132. 2 | 1768 | noncoding | —       |
| MSTRG. 28137. 1 | 1137 | noncoding | —       |
| MSTRG. 28131. 3 | 742  | coding    | PF03403 |
| MSTRG. 28141. 1 | 455  | noncoding | —       |
| MSTRG. 28142. 2 | 3367 | noncoding | —       |
| MSTRG. 28147. 1 | 5258 | coding    | PF07653 |
| MSTRG. 28154. 1 | 388  | noncoding | —       |
| MSTRG. 28160. 1 | 2618 | coding    | PF01642 |
| MSTRG. 28160. 5 | 3450 | coding    | PF01642 |
| MSTRG. 28161. 1 | 763  | coding    | PF01642 |
| MSTRG. 28162. 1 | 1842 | noncoding | —       |
| MSTRG. 28168. 3 | 1725 | coding    | PF00162 |
| MSTRG. 28174. 1 | 1950 | coding    | PF03299 |
| MSTRG. 28174. 2 | 1551 | coding    | PF03299 |
| MSTRG. 28175. 1 | 1340 | coding    | PF03299 |
| MSTRG. 28177. 1 | 2366 | coding    | PF00078 |
| MSTRG. 28178. 1 | 7084 | coding    | PF00078 |
| MSTRG. 28171. 1 | 474  | noncoding | —       |
| MSTRG. 28186. 1 | 1378 | noncoding | —       |
| MSTRG. 28191. 1 | 928  | coding    | PF03647 |
| MSTRG. 28191. 8 | 835  | noncoding | —       |
| MSTRG. 28192. 3 | 1374 | coding    | PF00043 |
| MSTRG. 28204. 2 | 1544 | noncoding | —       |
| MSTRG. 28207. 1 | 353  | noncoding | —       |
| MSTRG. 28207. 2 | 738  | noncoding | —       |
| MSTRG. 28207. 3 | 219  | noncoding | —       |
| MSTRG. 28211. 2 | 2122 | coding    | PF01151 |
| MSTRG. 28213. 2 | 926  | coding    | PF07654 |
| MSTRG. 28194. 2 | 735  | coding    | PF00969 |
| MSTRG. 28196. 2 | 649  | noncoding | —       |
| MSTRG. 28197. 1 | 595  | noncoding | —       |
| MSTRG. 28214. 1 | 829  | noncoding | —       |
| MSTRG. 28220. 1 | 3701 | coding    | PF12796 |
| MSTRG. 28220. 2 | 8055 | coding    | PF03792 |
| MSTRG. 28223. 2 | 1479 | noncoding | —       |
| MSTRG. 28224. 2 | 2339 | coding    | PF01553 |
| MSTRG. 28217. 1 | 738  | noncoding | —       |
| MSTRG. 28217. 2 | 904  | noncoding | —       |
| MSTRG. 28225. 1 | 1218 | noncoding | —       |
| MSTRG. 28227. 3 | 2275 | noncoding | —       |

|                  |      |           |         |
|------------------|------|-----------|---------|
| MSTRG. 28249. 2  | 5390 | coding    | PF07678 |
| MSTRG. 28249. 3  | 5390 | coding    | PF07678 |
| MSTRG. 28249. 4  | 5654 | coding    | PF07678 |
| MSTRG. 28249. 5  | 5389 | coding    | PF07678 |
| MSTRG. 28249. 7  | 3012 | coding    | PF07678 |
| MSTRG. 28249. 8  | 3247 | coding    | PF07678 |
| MSTRG. 28249. 6  | 5385 | coding    | PF07678 |
| MSTRG. 28249. 9  | 5252 | coding    | PF07678 |
| MSTRG. 28249. 11 | 5289 | coding    | PF07678 |
| MSTRG. 28250. 1  | 742  | noncoding | –       |
| MSTRG. 28251. 1  | 4619 | coding    | PF07678 |
| MSTRG. 28251. 2  | 4733 | coding    | PF07678 |
| MSTRG. 28251. 5  | 4236 | coding    | PF07678 |
| MSTRG. 28251. 6  | 1323 | noncoding | –       |
| MSTRG. 28249. 13 | 5424 | coding    | PF07678 |
| MSTRG. 28232. 2  | 3743 | coding    | PF08148 |
| MSTRG. 28233. 2  | 1185 | noncoding | –       |
| MSTRG. 28233. 3  | 1304 | noncoding | –       |
| MSTRG. 28233. 4  | 1186 | noncoding | –       |
| MSTRG. 28236. 2  | 3790 | coding    | PF00856 |
| MSTRG. 28236. 4  | 3875 | coding    | PF00856 |
| MSTRG. 28229. 1  | 1724 | coding    | PF13088 |
| MSTRG. 28239. 1  | 2900 | coding    | PF00012 |
| MSTRG. 28244. 2  | 5623 | coding    | PF00133 |
| MSTRG. 28244. 3  | 666  | noncoding | –       |
| MSTRG. 28244. 6  | 3660 | coding    | PF00133 |
| MSTRG. 28246. 2  | 1029 | noncoding | –       |
| MSTRG. 28247. 1  | 3934 | coding    | PF15096 |
| MSTRG. 28247. 3  | 2780 | coding    | PF15096 |
| MSTRG. 28247. 5  | 2321 | coding    | PF15096 |
| MSTRG. 28247. 2  | 2905 | coding    | PF15096 |
| MSTRG. 28241. 1  | 902  | noncoding | –       |
| MSTRG. 28242. 1  | 3788 | coding    | PF01214 |
| MSTRG. 28242. 3  | 3447 | coding    | PF01214 |
| MSTRG. 28242. 5  | 1997 | coding    | PF01214 |
| MSTRG. 28243. 1  | 1677 | coding    | PF01585 |
| MSTRG. 28255. 2  | 1639 | coding    | PF11032 |
| MSTRG. 28256. 5  | 3657 | coding    | PF12057 |
| MSTRG. 28257. 2  | 6635 | coding    | PF07001 |
| MSTRG. 28257. 3  | 7300 | coding    | PF07001 |
| MSTRG. 28257. 4  | 6641 | coding    | PF07001 |
| MSTRG. 28300. 1  | 889  | coding    | PF07654 |
| MSTRG. 28300. 2  | 2467 | coding    | PF00129 |
| MSTRG. 28301. 1  | 446  | noncoding | –       |
| MSTRG. 28300. 3  | 2551 | coding    | PF00129 |
| MSTRG. 28300. 4  | 1125 | coding    | PF00129 |
| MSTRG. 28300. 5  | 1125 | coding    | PF00129 |
| MSTRG. 28300. 6  | 3728 | coding    | PF00129 |
| MSTRG. 28300. 8  | 1056 | coding    | PF00129 |
| MSTRG. 28300. 9  | 2465 | coding    | PF00129 |
| MSTRG. 28300. 10 | 3682 | coding    | PF00129 |
| MSTRG. 28308. 1  | 3321 | coding    | PF07111 |
| MSTRG. 28308. 6  | 3555 | coding    | PF07111 |
| MSTRG. 28312. 1  | 4750 | coding    | PF07714 |

|                |       |           |         |
|----------------|-------|-----------|---------|
| MSTRG.28312.3  | 4267  | coding    | PF07714 |
| MSTRG.28312.2  | 4597  | coding    | PF07714 |
| MSTRG.28312.4  | 4151  | coding    | PF07714 |
| MSTRG.28315.1  | 561   | noncoding | —       |
| MSTRG.28316.8  | 1894  | noncoding | —       |
| MSTRG.28319.1  | 4686  | noncoding | —       |
| MSTRG.28319.2  | 4689  | noncoding | —       |
| MSTRG.28319.4  | 4623  | noncoding | —       |
| MSTRG.28319.6  | 5196  | noncoding | —       |
| MSTRG.28321.1  | 3003  | coding    | PF13914 |
| MSTRG.28325.2  | 3658  | coding    | PF05301 |
| MSTRG.28325.5  | 1324  | coding    | PF01084 |
| MSTRG.28324.3  | 4350  | noncoding | —       |
| MSTRG.28326.1  | 6011  | noncoding | —       |
| MSTRG.28328.2  | 2517  | noncoding | —       |
| MSTRG.28329.3  | 6399  | noncoding | —       |
| MSTRG.28332.2  | 972   | coding    | PF04032 |
| MSTRG.28300.13 | 2768  | noncoding | —       |
| MSTRG.28266.4  | 1655  | coding    | PF00129 |
| MSTRG.28266.5  | 1075  | coding    | PF00129 |
| MSTRG.28266.7  | 530   | coding    | PF00129 |
| MSTRG.28267.1  | 1096  | coding    | PF00129 |
| MSTRG.28267.2  | 985   | coding    | PF00129 |
| MSTRG.28266.17 | 422   | coding    | PF00129 |
| MSTRG.28274.1  | 1731  | noncoding | —       |
| MSTRG.28274.2  | 1661  | noncoding | —       |
| MSTRG.28270.1  | 5243  | coding    | PF01352 |
| MSTRG.28271.1  | 3405  | noncoding | —       |
| MSTRG.28281.2  | 4216  | noncoding | —       |
| MSTRG.28281.3  | 4224  | noncoding | —       |
| MSTRG.28281.4  | 4305  | noncoding | —       |
| MSTRG.28281.5  | 3952  | noncoding | —       |
| MSTRG.28281.6  | 3868  | noncoding | —       |
| MSTRG.28281.7  | 3020  | noncoding | —       |
| MSTRG.28281.8  | 4149  | noncoding | —       |
| MSTRG.28281.9  | 6589  | noncoding | —       |
| MSTRG.28281.10 | 1842  | noncoding | —       |
| MSTRG.28294.2  | 2590  | coding    | PF00622 |
| MSTRG.28297.3  | 589   | coding    | PF00009 |
| MSTRG.28335.1  | 5461  | coding    | PF02023 |
| MSTRG.28336.1  | 270   | noncoding | —       |
| MSTRG.28335.2  | 4649  | coding    | PF02023 |
| MSTRG.28335.3  | 5611  | coding    | PF02023 |
| MSTRG.28338.1  | 2777  | coding    | PF13843 |
| MSTRG.28339.3  | 7347  | coding    | PF02023 |
| MSTRG.28341.2  | 2906  | coding    | PF02023 |
| MSTRG.28341.4  | 3780  | coding    | PF02023 |
| MSTRG.28342.3  | 12054 | coding    | PF02023 |
| MSTRG.28342.4  | 10774 | coding    | PF02023 |
| MSTRG.28343.1  | 540   | noncoding | —       |
| MSTRG.28367.1  | 522   | noncoding | —       |
| MSTRG.28367.2  | 500   | noncoding | —       |
| MSTRG.28368.2  | 505   | noncoding | —       |
| MSTRG.28370.1  | 529   | noncoding | —       |

|                  |       |           |         |
|------------------|-------|-----------|---------|
| MSTRG. 28371. 1  | 1612  | noncoding | -       |
| MSTRG. 28372. 1  | 633   | noncoding | -       |
| MSTRG. 28375. 1  | 913   | noncoding | -       |
| MSTRG. 28377. 1  | 1079  | coding    | PF05577 |
| MSTRG. 28371. 2  | 472   | noncoding | -       |
| MSTRG. 28371. 3  | 2690  | noncoding | -       |
| MSTRG. 28378. 1  | 582   | noncoding | -       |
| MSTRG. 28379. 1  | 691   | coding    | PF00125 |
| MSTRG. 28380. 1  | 704   | noncoding | -       |
| MSTRG. 28386. 3  | 479   | noncoding | -       |
| MSTRG. 28386. 2  | 466   | noncoding | -       |
| MSTRG. 28388. 1  | 488   | coding    | PF00125 |
| MSTRG. 28386. 4  | 473   | noncoding | -       |
| MSTRG. 28388. 2  | 568   | coding    | PF00125 |
| MSTRG. 28389. 1  | 5896  | coding    | PF00538 |
| MSTRG. 28379. 2  | 526   | coding    | PF00125 |
| MSTRG. 28388. 3  | 573   | coding    | PF00125 |
| MSTRG. 28371. 4  | 458   | noncoding | -       |
| MSTRG. 28359. 7  | 2822  | noncoding | -       |
| MSTRG. 28359. 6  | 2921  | coding    | PF16000 |
| MSTRG. 28359. 3  | 5049  | coding    | PF16000 |
| MSTRG. 28359. 5  | 4112  | coding    | PF16000 |
| MSTRG. 28359. 8  | 3999  | coding    | PF16000 |
| MSTRG. 28359. 9  | 3363  | coding    | PF16000 |
| MSTRG. 28359. 10 | 4134  | coding    | PF16000 |
| MSTRG. 28361. 1  | 1772  | noncoding | -       |
| MSTRG. 28362. 1  | 4245  | noncoding | -       |
| MSTRG. 28359. 11 | 17006 | noncoding | -       |
| MSTRG. 28363. 1  | 38489 | noncoding | -       |
| MSTRG. 28363. 2  | 3541  | noncoding | -       |
| MSTRG. 28363. 3  | 15908 | noncoding | -       |
| MSTRG. 28366. 4  | 3051  | coding    | PF15903 |
| MSTRG. 28366. 5  | 7689  | coding    | PF15903 |
| MSTRG. 28366. 6  | 5266  | coding    | PF15903 |
| MSTRG. 28393. 1  | 4287  | coding    | PF15130 |
| MSTRG. 28393. 3  | 4163  | coding    | PF15130 |
| MSTRG. 28393. 4  | 3939  | coding    | PF15130 |
| MSTRG. 28393. 6  | 4177  | coding    | PF15130 |
| MSTRG. 28393. 2  | 4076  | coding    | PF15130 |
| MSTRG. 28397. 1  | 1946  | noncoding | -       |
| MSTRG. 28399. 2  | 1843  | coding    | PF00171 |
| MSTRG. 28400. 1  | 2159  | coding    | PF15354 |
| MSTRG. 28400. 2  | 2138  | coding    | PF15354 |
| MSTRG. 28400. 3  | 2217  | coding    | PF15354 |
| MSTRG. 28401. 1  | 643   | coding    | PF14927 |
| MSTRG. 28391. 2  | 816   | noncoding | -       |
| MSTRG. 28403. 1  | 215   | noncoding | -       |
| MSTRG. 28404. 1  | 1086  | coding    | PF00103 |
| MSTRG. 28409. 2  | 3257  | noncoding | -       |
| MSTRG. 28409. 1  | 3208  | coding    | PF00855 |
| MSTRG. 28409. 3  | 793   | noncoding | -       |
| MSTRG. 28409. 4  | 653   | noncoding | -       |
| MSTRG. 28409. 6  | 2722  | noncoding | -       |
| MSTRG. 28409. 5  | 666   | noncoding | -       |

|                |       |           |         |
|----------------|-------|-----------|---------|
| MSTRG.28409.7  | 7273  | noncoding | -       |
| MSTRG.28409.8  | 825   | noncoding | -       |
| MSTRG.28410.1  | 6408  | noncoding | -       |
| MSTRG.28409.9  | 2666  | noncoding | -       |
| MSTRG.28409.10 | 4942  | coding    | PF00078 |
| MSTRG.28411.1  | 3550  | noncoding | -       |
| MSTRG.28409.11 | 506   | noncoding | -       |
| MSTRG.28449.3  | 1567  | coding    | PF00505 |
| MSTRG.28457.1  | 2702  | coding    | PF00919 |
| MSTRG.28457.2  | 2447  | coding    | PF00919 |
| MSTRG.28457.5  | 4758  | noncoding | -       |
| MSTRG.28457.6  | 2588  | coding    | PF00919 |
| MSTRG.28459.1  | 3355  | noncoding | -       |
| MSTRG.28460.1  | 8758  | noncoding | -       |
| MSTRG.28463.1  | 5114  | noncoding | -       |
| MSTRG.28464.1  | 11933 | noncoding | -       |
| MSTRG.28466.1  | 1305  | noncoding | -       |
| MSTRG.28467.1  | 3366  | noncoding | -       |
| MSTRG.28470.1  | 7759  | noncoding | -       |
| MSTRG.28470.2  | 7489  | noncoding | -       |
| MSTRG.28471.2  | 9975  | coding    | PF02319 |
| MSTRG.28471.3  | 9745  | coding    | PF02319 |
| MSTRG.28474.1  | 2967  | noncoding | -       |
| MSTRG.28471.4  | 15005 | noncoding | -       |
| MSTRG.28476.2  | 1780  | coding    | PF03062 |
| MSTRG.28430.1  | 1586  | noncoding | -       |
| MSTRG.28430.2  | 1162  | noncoding | -       |
| MSTRG.28432.1  | 1044  | noncoding | -       |
| MSTRG.28433.1  | 887   | noncoding | -       |
| MSTRG.28439.1  | 4365  | noncoding | -       |
| MSTRG.28443.1  | 653   | noncoding | -       |
| MSTRG.28442.2  | 3749  | coding    | PF10599 |
| MSTRG.28445.1  | 4639  | noncoding | -       |
| MSTRG.28480.2  | 318   | noncoding | -       |
| MSTRG.28480.1  | 518   | noncoding | -       |
| MSTRG.28480.3  | 2535  | noncoding | -       |
| MSTRG.28481.3  | 2932  | coding    | PF09379 |
| MSTRG.28485.1  | 26684 | noncoding | -       |
| MSTRG.28485.2  | 12020 | noncoding | -       |
| MSTRG.28485.3  | 9093  | noncoding | -       |
| MSTRG.28485.4  | 3683  | noncoding | -       |
| MSTRG.28485.5  | 3185  | noncoding | -       |
| MSTRG.28485.6  | 3047  | noncoding | -       |
| MSTRG.28487.2  | 1993  | coding    | PF04440 |
| MSTRG.28487.3  | 1903  | coding    | PF04440 |
| MSTRG.28488.1  | 7823  | coding    | PF02373 |
| MSTRG.28488.2  | 8242  | coding    | PF02373 |
| MSTRG.28488.3  | 8498  | coding    | PF02373 |
| MSTRG.28488.4  | 5157  | coding    | PF02373 |
| MSTRG.28488.5  | 18427 | coding    | PF02373 |
| MSTRG.28488.7  | 19246 | noncoding | -       |
| MSTRG.28489.1  | 14934 | noncoding | -       |
| MSTRG.28488.8  | 56960 | noncoding | -       |
| MSTRG.28488.9  | 41772 | noncoding | -       |



|                  |       |           |         |
|------------------|-------|-----------|---------|
| MSTRG. 28488. 10 | 36069 | noncoding | —       |
| MSTRG. 28488. 11 | 15024 | noncoding | —       |
| MSTRG. 28491. 1  | 2030  | noncoding | —       |
| MSTRG. 28492. 1  | 486   | noncoding | —       |
| MSTRG. 28495. 1  | 2523  | noncoding | —       |
| MSTRG. 28495. 2  | 2085  | noncoding | —       |
| MSTRG. 28499. 3  | 2516  | noncoding | —       |
| MSTRG. 28501. 3  | 4205  | coding    | PF07798 |
| MSTRG. 28501. 4  | 3967  | coding    | PF07798 |
| MSTRG. 28502. 1  | 255   | noncoding | —       |
| MSTRG. 28505. 3  | 1598  | coding    | PF02146 |
| MSTRG. 28509. 4  | 1680  | noncoding | —       |
| MSTRG. 28509. 5  | 2225  | noncoding | —       |
| MSTRG. 28509. 2  | 855   | noncoding | —       |
| MSTRG. 28509. 3  | 4100  | noncoding | —       |
| MSTRG. 28510. 1  | 782   | noncoding | —       |
| MSTRG. 28514. 5  | 6959  | noncoding | —       |
| MSTRG. 28515. 1  | 2086  | coding    | PF04750 |
| MSTRG. 28515. 2  | 1918  | coding    | PF04750 |
| MSTRG. 28515. 3  | 1222  | coding    | PF04750 |
| MSTRG. 28517. 1  | 850   | noncoding | —       |
| MSTRG. 28517. 2  | 565   | noncoding | —       |
| MSTRG. 28517. 3  | 886   | noncoding | —       |
| MSTRG. 28517. 4  | 795   | noncoding | —       |
| MSTRG. 28517. 5  | 464   | noncoding | —       |
| MSTRG. 28520. 2  | 1965  | noncoding | —       |
| MSTRG. 28522. 2  | 9588  | coding    | PF01151 |
| MSTRG. 28522. 3  | 4100  | coding    | PF01151 |
| MSTRG. 28522. 4  | 3965  | coding    | PF01151 |
| MSTRG. 28522. 6  | 4838  | coding    | PF01151 |
| MSTRG. 28522. 8  | 4298  | coding    | PF01151 |
| MSTRG. 28525. 2  | 2711  | coding    | PF00069 |
| MSTRG. 28525. 3  | 4257  | coding    | PF00069 |
| MSTRG. 28532. 3  | 2811  | coding    | PF14942 |
| MSTRG. 28532. 5  | 2393  | noncoding | —       |
| MSTRG. 28533. 1  | 3745  | noncoding | —       |
| MSTRG. 28538. 2  | 9064  | coding    | PF00681 |
| MSTRG. 28546. 1  | 2971  | coding    | PF15066 |
| MSTRG. 28546. 2  | 1638  | coding    | PF15066 |
| MSTRG. 28546. 3  | 2479  | coding    | PF15066 |
| MSTRG. 28546. 4  | 2508  | coding    | PF15066 |
| MSTRG. 28546. 12 | 3368  | coding    | PF15066 |
| MSTRG. 28546. 10 | 2264  | coding    | PF15066 |
| MSTRG. 28546. 8  | 1733  | coding    | PF15066 |
| MSTRG. 28539. 2  | 9168  | noncoding | —       |
| MSTRG. 28539. 3  | 8279  | noncoding | —       |
| MSTRG. 28539. 5  | 8332  | noncoding | —       |
| MSTRG. 28539. 6  | 8600  | noncoding | —       |
| MSTRG. 28539. 7  | 8561  | noncoding | —       |
| MSTRG. 28539. 8  | 7258  | noncoding | —       |
| MSTRG. 28550. 3  | 4269  | noncoding | —       |
| MSTRG. 28551. 1  | 4331  | noncoding | —       |
| MSTRG. 28552. 1  | 1321  | noncoding | —       |
| MSTRG. 28553. 1  | 3225  | noncoding | —       |

|                |       |           |         |
|----------------|-------|-----------|---------|
| MSTRG.28554.1  | 7008  | coding    | PF01409 |
| MSTRG.28555.2  | 1134  | noncoding | —       |
| MSTRG.28555.3  | 879   | coding    | PF05347 |
| MSTRG.28556.1  | 2489  | noncoding | —       |
| MSTRG.28557.1  | 2533  | noncoding | —       |
| MSTRG.28555.4  | 619   | noncoding | —       |
| MSTRG.28559.1  | 922   | noncoding | —       |
| MSTRG.28561.3  | 5542  | coding    | PF08584 |
| MSTRG.28563.1  | 3331  | noncoding | —       |
| MSTRG.28563.5  | 2171  | noncoding | —       |
| MSTRG.28564.1  | 5853  | noncoding | —       |
| MSTRG.28565.1  | 895   | noncoding | —       |
| MSTRG.28566.1  | 5343  | noncoding | —       |
| MSTRG.28567.1  | 2589  | noncoding | —       |
| MSTRG.28568.1  | 552   | noncoding | —       |
| MSTRG.28571.2  | 2312  | coding    | PF15023 |
| MSTRG.28571.3  | 1290  | coding    | PF15023 |
| MSTRG.28572.1  | 659   | noncoding | —       |
| MSTRG.28579.2  | 4670  | noncoding | —       |
| MSTRG.28586.1  | 2010  | coding    | PF03953 |
| MSTRG.28586.3  | 1919  | coding    | PF03953 |
| MSTRG.28586.4  | 1552  | coding    | PF03953 |
| MSTRG.28586.5  | 1548  | coding    | PF03953 |
| MSTRG.28587.2  | 1007  | noncoding | —       |
| MSTRG.28587.3  | 1507  | noncoding | —       |
| MSTRG.28588.1  | 16784 | noncoding | —       |
| MSTRG.28590.1  | 205   | noncoding | —       |
| MSTRG.28588.2  | 5470  | noncoding | —       |
| MSTRG.28594.2  | 1395  | coding    | PF00079 |
| MSTRG.28581.2  | 6430  | coding    | PF12002 |
| MSTRG.28585.1  | 640   | coding    | PF00069 |
| MSTRG.28595.1  | 525   | noncoding | —       |
| MSTRG.28600.2  | 1644  | coding    | PF16363 |
| MSTRG.28600.3  | 2211  | coding    | PF16363 |
| MSTRG.28600.6  | 5828  | coding    | PF16363 |
| MSTRG.28600.5  | 1975  | coding    | PF16363 |
| MSTRG.28600.4  | 3107  | coding    | PF16363 |
| MSTRG.28600.7  | 5803  | coding    | PF16363 |
| MSTRG.28600.8  | 1459  | coding    | PF16363 |
| MSTRG.28600.9  | 1666  | coding    | PF16363 |
| MSTRG.28602.1  | 229   | noncoding | —       |
| MSTRG.28603.1  | 11523 | noncoding | —       |
| MSTRG.28604.1  | 625   | noncoding | —       |
| MSTRG.28605.1  | 1377  | noncoding | —       |
| MSTRG.28606.1  | 3136  | noncoding | —       |
| MSTRG.28597.1  | 1274  | noncoding | —       |
| MSTRG.28613.7  | 3875  | coding    | PF15469 |
| MSTRG.28613.6  | 3177  | coding    | PF15469 |
| MSTRG.28613.8  | 9251  | coding    | PF15469 |
| MSTRG.28613.9  | 9449  | coding    | PF15469 |
| MSTRG.28613.10 | 3194  | noncoding | —       |
| MSTRG.28614.1  | 3257  | noncoding | —       |
| MSTRG.28609.1  | 545   | noncoding | —       |
| MSTRG.28618.1  | 1047  | noncoding | —       |

|               |       |           |         |
|---------------|-------|-----------|---------|
| MSTRG.28620.4 | 4296  | noncoding | -       |
| MSTRG.28620.3 | 4394  | noncoding | -       |
| MSTRG.28623.2 | 2901  | noncoding | -       |
| MSTRG.28625.1 | 870   | coding    | PF02966 |
| MSTRG.28625.2 | 3363  | coding    | PF02966 |
| MSTRG.28625.3 | 794   | coding    | PF02966 |
| MSTRG.28625.4 | 864   | coding    | PF02966 |
| MSTRG.28627.4 | 3796  | coding    | PF09309 |
| MSTRG.28627.3 | 3514  | coding    | PF09309 |
| MSTRG.28627.5 | 3272  | coding    | PF09309 |
| MSTRG.28628.1 | 836   | noncoding | -       |
| MSTRG.28631.2 | 1485  | noncoding | -       |
| MSTRG.28631.3 | 19957 | noncoding | -       |
| MSTRG.28633.1 | 710   | noncoding | -       |
| MSTRG.28642.2 | 6555  | noncoding | -       |
| MSTRG.28642.8 | 5980  | noncoding | -       |
| MSTRG.28642.7 | 8945  | noncoding | -       |
| MSTRG.28642.5 | 7803  | noncoding | -       |
| MSTRG.28642.6 | 9134  | noncoding | -       |
| MSTRG.28642.3 | 8079  | noncoding | -       |
| MSTRG.28638.1 | 450   | noncoding | -       |
| MSTRG.28638.2 | 795   | noncoding | -       |
| MSTRG.28644.1 | 10359 | noncoding | -       |
| MSTRG.28645.2 | 7359  | noncoding | -       |
| MSTRG.28646.3 | 617   | noncoding | -       |
| MSTRG.28646.4 | 512   | noncoding | -       |
| MSTRG.28646.5 | 559   | noncoding | -       |
| MSTRG.28647.1 | 5219  | noncoding | -       |
| MSTRG.28648.1 | 1029  | noncoding | -       |
| MSTRG.28648.2 | 1213  | noncoding | -       |
| MSTRG.28648.3 | 928   | noncoding | -       |
| MSTRG.28650.1 | 1046  | noncoding | -       |
| MSTRG.28650.3 | 457   | noncoding | -       |
| MSTRG.28650.2 | 629   | noncoding | -       |
| MSTRG.28652.1 | 369   | noncoding | -       |
| MSTRG.28653.1 | 4627  | noncoding | -       |
| MSTRG.28654.1 | 1767  | noncoding | -       |
| MSTRG.28656.1 | 252   | noncoding | -       |
| MSTRG.28657.3 | 7770  | noncoding | -       |
| MSTRG.28658.1 | 1054  | noncoding | -       |
| MSTRG.28662.4 | 3001  | noncoding | -       |
| MSTRG.28662.3 | 1986  | noncoding | -       |
| MSTRG.28661.1 | 740   | noncoding | -       |
| MSTRG.28661.2 | 405   | noncoding | -       |
| MSTRG.28663.1 | 2607  | coding    | PF15813 |
| MSTRG.28663.2 | 2743  | coding    | PF15813 |
| MSTRG.28669.2 | 2650  | coding    | PF08294 |
| MSTRG.28672.1 | 859   | noncoding | -       |
| MSTRG.28672.2 | 593   | noncoding | -       |
| MSTRG.28672.3 | 637   | noncoding | -       |
| MSTRG.28677.1 | 865   | noncoding | -       |
| MSTRG.28677.2 | 286   | noncoding | -       |
| MSTRG.28682.2 | 6897  | coding    | PF14726 |
| MSTRG.28688.2 | 2314  | noncoding | -       |

|               |       |           |         |
|---------------|-------|-----------|---------|
| MSTRG.28693.1 | 344   | noncoding | -       |
| MSTRG.28702.1 | 445   | noncoding | -       |
| MSTRG.28705.1 | 395   | noncoding | -       |
| MSTRG.28707.1 | 1129  | noncoding | -       |
| MSTRG.28712.2 | 433   | noncoding | -       |
| MSTRG.28712.3 | 347   | coding    | PF01159 |
| MSTRG.28714.1 | 323   | noncoding | -       |
| MSTRG.28716.1 | 1318  | noncoding | -       |
| MSTRG.28718.2 | 3307  | coding    | PF00792 |
| MSTRG.28715.1 | 320   | noncoding | -       |
| MSTRG.28720.1 | 341   | coding    | PF00338 |
| MSTRG.28731.1 | 676   | noncoding | -       |
| MSTRG.28732.1 | 591   | noncoding | -       |
| MSTRG.28742.4 | 1992  | coding    | PF15369 |
| MSTRG.28743.1 | 866   | noncoding | -       |
| MSTRG.28744.1 | 4896  | noncoding | -       |
| MSTRG.28745.1 | 1965  | noncoding | -       |
| MSTRG.28745.3 | 2595  | noncoding | -       |
| MSTRG.28745.5 | 5836  | noncoding | -       |
| MSTRG.28746.1 | 6484  | coding    | PF02181 |
| MSTRG.28746.3 | 5594  | coding    | PF02181 |
| MSTRG.28746.4 | 669   | noncoding | -       |
| MSTRG.28746.5 | 2175  | noncoding | -       |
| MSTRG.28737.2 | 2732  | noncoding | -       |
| MSTRG.28737.3 | 2292  | noncoding | -       |
| MSTRG.28739.3 | 4338  | coding    | PF16566 |
| MSTRG.28739.4 | 1286  | coding    | PF16566 |
| MSTRG.28739.5 | 17791 | coding    | PF16566 |
| MSTRG.28739.6 | 4435  | noncoding | -       |
| MSTRG.28740.1 | 1105  | noncoding | -       |
| MSTRG.28755.1 | 550   | noncoding | -       |
| MSTRG.28765.1 | 2615  | noncoding | -       |
| MSTRG.28770.1 | 8504  | coding    | PF02023 |
| MSTRG.28770.3 | 8509  | coding    | PF02023 |
| MSTRG.28780.1 | 4045  | noncoding | -       |
| MSTRG.28780.3 | 3330  | noncoding | -       |
| MSTRG.28784.1 | 10879 | coding    | PF13919 |
| MSTRG.28784.2 | 8358  | coding    | PF13919 |
| MSTRG.28783.1 | 1753  | noncoding | -       |
| MSTRG.28790.1 | 401   | noncoding | -       |
| MSTRG.28790.2 | 444   | noncoding | -       |
| MSTRG.28794.1 | 444   | noncoding | -       |
| MSTRG.28799.2 | 5167  | coding    | PF00028 |
| MSTRG.28822.1 | 4929  | noncoding | -       |
| MSTRG.28830.1 | 429   | noncoding | -       |
| MSTRG.28839.1 | 3217  | coding    | PF05236 |
| MSTRG.28839.2 | 4138  | coding    | PF05236 |
| MSTRG.28839.4 | 2507  | noncoding | -       |
| MSTRG.28842.1 | 6646  | noncoding | -       |
| MSTRG.28844.6 | 3165  | coding    | PF05030 |
| MSTRG.28844.5 | 4389  | coding    | PF05030 |
| MSTRG.28846.3 | 3948  | coding    | PF01205 |
| MSTRG.28853.2 | 5406  | coding    | PF01237 |
| MSTRG.28853.3 | 10071 | coding    | PF01237 |

|                |       |           |         |
|----------------|-------|-----------|---------|
| MSTRG.28853.5  | 3800  | coding    | PF01237 |
| MSTRG.28853.6  | 2602  | noncoding | —       |
| MSTRG.28854.1  | 597   | noncoding | —       |
| MSTRG.28853.10 | 1505  | noncoding | —       |
| MSTRG.28853.9  | 3265  | coding    | PF01237 |
| MSTRG.28856.1  | 6351  | noncoding | —       |
| MSTRG.28857.6  | 1607  | noncoding | —       |
| MSTRG.28857.5  | 1828  | noncoding | —       |
| MSTRG.28857.8  | 2436  | noncoding | —       |
| MSTRG.28857.7  | 1158  | noncoding | —       |
| MSTRG.28858.2  | 4140  | coding    | PF10300 |
| MSTRG.28859.1  | 13264 | noncoding | —       |
| MSTRG.28862.2  | 11292 | coding    | PF06008 |
| MSTRG.28862.3  | 12975 | coding    | PF06008 |
| MSTRG.28862.4  | 6829  | coding    | PF06008 |
| MSTRG.28862.5  | 10742 | coding    | PF06008 |
| MSTRG.28862.6  | 10801 | coding    | PF06008 |
| MSTRG.28862.7  | 965   | coding    | PF00055 |
| MSTRG.28860.2  | 4033  | coding    | PF01163 |
| MSTRG.28866.2  | 3185  | coding    | PF10482 |
| MSTRG.28866.3  | 887   | noncoding | —       |
| MSTRG.28869.1  | 364   | noncoding | —       |
| MSTRG.28879.1  | 4309  | coding    | PF01423 |
| MSTRG.28879.4  | 878   | coding    | PF01423 |
| MSTRG.28879.3  | 1167  | coding    | PF01423 |
| MSTRG.28879.5  | 1041  | coding    | PF01423 |
| MSTRG.28880.1  | 23001 | coding    | PF15782 |
| MSTRG.28880.3  | 4098  | coding    | PF13878 |
| MSTRG.28880.2  | 6403  | coding    | PF13880 |
| MSTRG.28880.4  | 3798  | coding    | PF13878 |
| MSTRG.28882.1  | 3915  | noncoding | —       |
| MSTRG.28883.1  | 6184  | noncoding | —       |
| MSTRG.28884.1  | 1592  | noncoding | —       |
| MSTRG.28885.2  | 709   | noncoding | —       |
| MSTRG.28885.3  | 636   | noncoding | —       |
| MSTRG.28886.2  | 4773  | coding    | PF08912 |
| MSTRG.28887.1  | 5270  | noncoding | —       |
| MSTRG.28887.2  | 4620  | noncoding | —       |
| MSTRG.28887.4  | 5281  | noncoding | —       |
| MSTRG.28888.1  | 3733  | coding    | PF11957 |
| MSTRG.28873.1  | 1034  | noncoding | —       |
| MSTRG.28876.1  | 2310  | coding    | PF01093 |
| MSTRG.28890.1  | 2317  | coding    | PF00303 |
| MSTRG.28890.5  | 1237  | coding    | PF00303 |
| MSTRG.28890.6  | 1673  | coding    | PF00303 |
| MSTRG.28890.4  | 1336  | coding    | PF00303 |
| MSTRG.28890.3  | 3496  | coding    | PF00303 |
| MSTRG.28893.1  | 2316  | noncoding | —       |
| MSTRG.28892.2  | 4454  | noncoding | —       |
| MSTRG.28894.1  | 891   | noncoding | —       |
| MSTRG.28894.2  | 288   | noncoding | —       |
| MSTRG.28900.3  | 2576  | coding    | PF05063 |
| MSTRG.28905.2  | 5529  | coding    | PF08235 |
| MSTRG.28907.1  | 1026  | noncoding | —       |

|                  |       |           |         |
|------------------|-------|-----------|---------|
| MSTRG. 28908. 1  | 3116  | noncoding | -       |
| MSTRG. 28914. 1  | 3311  | coding    | PF03359 |
| MSTRG. 28914. 2  | 3862  | coding    | PF03359 |
| MSTRG. 28914. 3  | 1910  | coding    | PF03359 |
| MSTRG. 28917. 1  | 1673  | noncoding | -       |
| MSTRG. 28920. 1  | 4777  | noncoding | -       |
| MSTRG. 28923. 4  | 3791  | coding    | PF05902 |
| MSTRG. 28923. 3  | 4124  | coding    | PF05902 |
| MSTRG. 28923. 5  | 4060  | coding    | PF05902 |
| MSTRG. 28923. 7  | 3969  | coding    | PF05902 |
| MSTRG. 28923. 6  | 4164  | coding    | PF05902 |
| MSTRG. 28923. 8  | 3795  | coding    | PF05902 |
| MSTRG. 28934. 1  | 7655  | noncoding | -       |
| MSTRG. 28935. 1  | 11437 | noncoding | -       |
| MSTRG. 28936. 1  | 8304  | noncoding | -       |
| MSTRG. 28937. 1  | 643   | noncoding | -       |
| MSTRG. 28933. 3  | 1647  | noncoding | -       |
| MSTRG. 28941. 1  | 5622  | noncoding | -       |
| MSTRG. 28942. 1  | 6076  | noncoding | -       |
| MSTRG. 28940. 4  | 8013  | coding    | PF14818 |
| MSTRG. 28949. 2  | 1128  | coding    | PF01257 |
| MSTRG. 28949. 4  | 1449  | coding    | PF01257 |
| MSTRG. 28951. 2  | 4502  | noncoding | -       |
| MSTRG. 28951. 1  | 9389  | coding    | PF12796 |
| MSTRG. 28951. 6  | 2448  | coding    | PF12796 |
| MSTRG. 28951. 5  | 3441  | coding    | PF12796 |
| MSTRG. 28952. 1  | 3212  | noncoding | -       |
| MSTRG. 28953. 1  | 1308  | noncoding | -       |
| MSTRG. 28947. 1  | 3256  | coding    | PF00620 |
| MSTRG. 28961. 6  | 5066  | noncoding | -       |
| MSTRG. 28961. 8  | 5007  | noncoding | -       |
| MSTRG. 28961. 4  | 5572  | noncoding | -       |
| MSTRG. 28961. 5  | 5623  | noncoding | -       |
| MSTRG. 28961. 3  | 3717  | noncoding | -       |
| MSTRG. 28961. 7  | 3797  | noncoding | -       |
| MSTRG. 28961. 10 | 6118  | noncoding | -       |
| MSTRG. 28961. 12 | 4876  | noncoding | -       |
| MSTRG. 28961. 9  | 3822  | noncoding | -       |
| MSTRG. 28961. 13 | 1867  | noncoding | -       |
| MSTRG. 28961. 14 | 451   | noncoding | -       |
| MSTRG. 28961. 15 | 308   | noncoding | -       |
| MSTRG. 28961. 16 | 237   | noncoding | -       |
| MSTRG. 28963. 1  | 1826  | coding    | PF00078 |
| MSTRG. 28967. 1  | 1177  | noncoding | -       |
| MSTRG. 28975. 1  | 522   | noncoding | -       |
| MSTRG. 28980. 2  | 26706 | noncoding | -       |
| MSTRG. 28976. 2  | 1589  | coding    | PF00459 |
| MSTRG. 28976. 3  | 1336  | coding    | PF00459 |
| MSTRG. 28977. 1  | 978   | noncoding | -       |
| MSTRG. 28976. 4  | 794   | coding    | PF00459 |
| MSTRG. 28987. 2  | 6176  | coding    | PF04707 |
| MSTRG. 28988. 2  | 5079  | coding    | PF16474 |
| MSTRG. 28988. 3  | 5809  | coding    | PF15627 |
| MSTRG. 28990. 1  | 3735  | noncoding | -       |

|                  |       |           |         |
|------------------|-------|-----------|---------|
| MSTRG. 28988. 4  | 1884  | coding    | PF16474 |
| MSTRG. 28988. 5  | 3239  | coding    | PF15627 |
| MSTRG. 28988. 6  | 3950  | coding    | PF15627 |
| MSTRG. 28988. 8  | 2375  | coding    | PF15627 |
| MSTRG. 28988. 9  | 3164  | coding    | PF15627 |
| MSTRG. 28988. 10 | 2170  | coding    | PF15627 |
| MSTRG. 28988. 11 | 2919  | coding    | PF15627 |
| MSTRG. 28988. 12 | 2241  | coding    | PF15627 |
| MSTRG. 28993. 2  | 1110  | coding    | PF09754 |
| MSTRG. 28993. 3  | 1505  | coding    | PF09754 |
| MSTRG. 29016. 1  | 1622  | noncoding | —       |
| MSTRG. 29017. 8  | 3450  | noncoding | —       |
| MSTRG. 29017. 9  | 9189  | noncoding | —       |
| MSTRG. 29017. 10 | 2494  | noncoding | —       |
| MSTRG. 29017. 12 | 1839  | noncoding | —       |
| MSTRG. 29017. 13 | 2573  | noncoding | —       |
| MSTRG. 29017. 11 | 9079  | noncoding | —       |
| MSTRG. 29000. 1  | 1616  | noncoding | —       |
| MSTRG. 29008. 1  | 11721 | noncoding | —       |
| MSTRG. 29009. 1  | 17512 | noncoding | —       |
| MSTRG. 29013. 3  | 6255  | noncoding | —       |
| MSTRG. 28996. 1  | 1064  | noncoding | —       |
| MSTRG. 29020. 2  | 9197  | noncoding | —       |
| MSTRG. 29020. 3  | 2877  | noncoding | —       |
| MSTRG. 29021. 1  | 3831  | noncoding | —       |
| MSTRG. 29022. 1  | 330   | noncoding | —       |
| MSTRG. 29019. 1  | 570   | noncoding | —       |
| MSTRG. 29024. 2  | 4604  | noncoding | —       |
| MSTRG. 29024. 4  | 4835  | noncoding | —       |
| MSTRG. 29028. 3  | 9290  | noncoding | —       |
| MSTRG. 29026. 3  | 3940  | noncoding | —       |
| MSTRG. 29027. 1  | 1667  | noncoding | —       |
| MSTRG. 29029. 1  | 1403  | noncoding | —       |
| MSTRG. 29034. 1  | 2265  | noncoding | —       |
| MSTRG. 29035. 1  | 5913  | coding    | PF01477 |
| MSTRG. 29037. 1  | 1437  | noncoding | —       |
| MSTRG. 29041. 1  | 9124  | coding    | PF02891 |
| MSTRG. 29041. 5  | 2906  | coding    | PF14324 |
| MSTRG. 29041. 4  | 3343  | coding    | PF14324 |
| MSTRG. 29041. 7  | 2119  | coding    | PF14324 |
| MSTRG. 29043. 1  | 1357  | coding    | PF00164 |
| MSTRG. 29043. 2  | 1530  | coding    | PF00164 |
| MSTRG. 29043. 3  | 1690  | coding    | PF00164 |
| MSTRG. 29045. 1  | 2259  | coding    | PF00004 |
| MSTRG. 29049. 4  | 1562  | coding    | PF13242 |
| MSTRG. 29051. 2  | 547   | noncoding | —       |
| MSTRG. 29054. 4  | 9789  | coding    | PF03166 |
| MSTRG. 29054. 5  | 7184  | coding    | PF03166 |
| MSTRG. 29055. 1  | 9395  | noncoding | —       |
| MSTRG. 29064. 3  | 1750  | noncoding | —       |
| MSTRG. 29064. 4  | 5357  | noncoding | —       |
| MSTRG. 29064. 6  | 1241  | noncoding | —       |
| MSTRG. 29065. 1  | 2233  | noncoding | —       |
| MSTRG. 29065. 2  | 596   | noncoding | —       |

|                  |      |           |         |
|------------------|------|-----------|---------|
| MSTRG. 29068. 1  | 1459 | noncoding | –       |
| MSTRG. 29068. 3  | 1277 | noncoding | –       |
| MSTRG. 29079. 2  | 449  | noncoding | –       |
| MSTRG. 29079. 1  | 5703 | coding    | PF00063 |
| MSTRG. 29079. 4  | 651  | noncoding | –       |
| MSTRG. 29079. 3  | 5718 | coding    | PF00063 |
| MSTRG. 29079. 5  | 5864 | coding    | PF00063 |
| MSTRG. 29080. 1  | 4065 | noncoding | –       |
| MSTRG. 29086. 2  | 3279 | noncoding | –       |
| MSTRG. 29086. 3  | 3188 | noncoding | –       |
| MSTRG. 29082. 3  | 2351 | coding    | PF12269 |
| MSTRG. 29082. 4  | 2445 | coding    | PF12269 |
| MSTRG. 29083. 1  | 891  | noncoding | –       |
| MSTRG. 29085. 1  | 914  | coding    | PF07160 |
| MSTRG. 29092. 2  | 2760 | noncoding | –       |
| MSTRG. 29092. 6  | 2898 | noncoding | –       |
| MSTRG. 29092. 7  | 3187 | noncoding | –       |
| MSTRG. 29092. 5  | 2996 | noncoding | –       |
| MSTRG. 29093. 4  | 2179 | coding    | PF03949 |
| MSTRG. 29094. 1  | 383  | noncoding | –       |
| MSTRG. 29099. 2  | 3024 | noncoding | –       |
| MSTRG. 29101. 1  | 4052 | noncoding | –       |
| MSTRG. 29101. 2  | 2917 | noncoding | –       |
| MSTRG. 29107. 1  | 717  | noncoding | –       |
| MSTRG. 29108. 1  | 276  | noncoding | –       |
| MSTRG. 29111. 3  | 2173 | coding    | PF14048 |
| MSTRG. 29111. 4  | 2297 | coding    | PF14048 |
| MSTRG. 29111. 2  | 2184 | coding    | PF14048 |
| MSTRG. 29120. 3  | 3333 | noncoding | –       |
| MSTRG. 29120. 4  | 2371 | noncoding | –       |
| MSTRG. 29121. 1  | 8960 | coding    | PF15792 |
| MSTRG. 29121. 3  | 3914 | coding    | PF15792 |
| MSTRG. 29113. 1  | 1447 | coding    | PF09749 |
| MSTRG. 29115. 1  | 854  | noncoding | –       |
| MSTRG. 29128. 1  | 2216 | noncoding | –       |
| MSTRG. 29129. 1  | 344  | noncoding | –       |
| MSTRG. 29129. 2  | 1069 | noncoding | –       |
| MSTRG. 29130. 1  | 2058 | noncoding | –       |
| MSTRG. 29122. 1  | 295  | noncoding | –       |
| MSTRG. 29126. 1  | 256  | noncoding | –       |
| MSTRG. 29133. 1  | 1023 | noncoding | –       |
| MSTRG. 29136. 2  | 7348 | noncoding | –       |
| MSTRG. 29136. 5  | 5244 | noncoding | –       |
| MSTRG. 29136. 1  | 5822 | noncoding | –       |
| MSTRG. 29137. 1  | 653  | noncoding | –       |
| MSTRG. 29155. 4  | 3418 | coding    | PF00632 |
| MSTRG. 29155. 6  | 3580 | coding    | PF00632 |
| MSTRG. 29155. 1  | 7941 | coding    | PF00632 |
| MSTRG. 29155. 8  | 7971 | coding    | PF00632 |
| MSTRG. 29155. 11 | 4079 | coding    | PF00632 |
| MSTRG. 29155. 15 | 3083 | coding    | PF00168 |
| MSTRG. 29155. 16 | 7850 | coding    | PF00632 |
| MSTRG. 29155. 17 | 7521 | coding    | PF00632 |
| MSTRG. 29155. 19 | 1490 | coding    | PF00168 |



|                  |      |           |         |
|------------------|------|-----------|---------|
| MSTRG. 29157. 1  | 5860 | noncoding | —       |
| MSTRG. 29155. 22 | 1166 | noncoding | —       |
| MSTRG. 29160. 1  | 3346 | noncoding | —       |
| MSTRG. 29161. 1  | 694  | noncoding | —       |
| MSTRG. 29142. 1  | 3268 | noncoding | —       |
| MSTRG. 29143. 1  | 968  | noncoding | —       |
| MSTRG. 29144. 3  | 4915 | coding    | PF13895 |
| MSTRG. 29149. 2  | 6079 | noncoding | —       |
| MSTRG. 29149. 8  | 4298 | noncoding | —       |
| MSTRG. 29149. 9  | 1825 | noncoding | —       |
| MSTRG. 29149. 10 | 2511 | noncoding | —       |
| MSTRG. 29149. 11 | 2496 | noncoding | —       |
| MSTRG. 29150. 1  | 4833 | coding    | PF03388 |
| MSTRG. 29150. 2  | 4001 | coding    | PF03388 |
| MSTRG. 29150. 3  | 3878 | coding    | PF03388 |
| MSTRG. 29150. 4  | 5515 | coding    | PF03388 |
| MSTRG. 29150. 5  | 2356 | coding    | PF03388 |
| MSTRG. 29150. 6  | 3858 | coding    | PF03388 |
| MSTRG. 29150. 7  | 3080 | coding    | PF03388 |
| MSTRG. 29150. 8  | 2011 | coding    | PF03388 |
| MSTRG. 29165. 3  | 993  | noncoding | —       |
| MSTRG. 29162. 1  | 668  | noncoding | —       |
| MSTRG. 29162. 2  | 626  | noncoding | —       |
| MSTRG. 29163. 1  | 626  | noncoding | —       |
| MSTRG. 29172. 1  | 220  | noncoding | —       |
| MSTRG. 29191. 1  | 2448 | noncoding | —       |
| MSTRG. 29192. 1  | 1190 | noncoding | —       |
| MSTRG. 29195. 1  | 2685 | noncoding | —       |
| MSTRG. 29195. 2  | 1213 | noncoding | —       |
| MSTRG. 29195. 3  | 1066 | noncoding | —       |
| MSTRG. 29195. 4  | 1071 | noncoding | —       |
| MSTRG. 29201. 1  | 232  | noncoding | —       |
| MSTRG. 29202. 4  | 5813 | noncoding | —       |
| MSTRG. 29202. 6  | 2782 | noncoding | —       |
| MSTRG. 29202. 7  | 3698 | noncoding | —       |
| MSTRG. 29202. 8  | 1591 | noncoding | —       |
| MSTRG. 29202. 9  | 2937 | noncoding | —       |
| MSTRG. 29196. 1  | 1362 | noncoding | —       |
| MSTRG. 29198. 1  | 8020 | noncoding | —       |
| MSTRG. 29198. 2  | 2786 | noncoding | —       |
| MSTRG. 29198. 4  | 1939 | noncoding | —       |
| MSTRG. 29207. 2  | 4813 | coding    | PF00481 |
| MSTRG. 29207. 3  | 4738 | coding    | PF00481 |
| MSTRG. 29208. 1  | 221  | noncoding | —       |
| MSTRG. 29213. 1  | 465  | noncoding | —       |
| MSTRG. 29214. 1  | 5338 | noncoding | —       |
| MSTRG. 29215. 1  | 875  | noncoding | —       |
| MSTRG. 29219. 1  | 547  | noncoding | —       |
| MSTRG. 29231. 1  | 3275 | noncoding | —       |
| MSTRG. 29231. 2  | 4990 | noncoding | —       |
| MSTRG. 29229. 16 | 1313 | coding    | PF13804 |
| MSTRG. 29232. 1  | 1595 | noncoding | —       |
| MSTRG. 29232. 2  | 1106 | noncoding | —       |
| MSTRG. 29221. 2  | 643  | coding    | PF01096 |

|                 |       |           |         |
|-----------------|-------|-----------|---------|
| MSTRG. 29224. 2 | 1198  | coding    | PF02245 |
| MSTRG. 29226. 2 | 559   | coding    | PF00042 |
| MSTRG. 29226. 3 | 559   | coding    | PF00042 |
| MSTRG. 29233. 3 | 1581  | coding    | PF03194 |
| MSTRG. 29238. 2 | 1117  | noncoding | –       |
| MSTRG. 29239. 3 | 2403  | coding    | PF12036 |
| MSTRG. 29240. 1 | 922   | coding    | PF00334 |
| MSTRG. 29242. 2 | 3174  | coding    | PF09457 |
| MSTRG. 29242. 3 | 3294  | coding    | PF09457 |
| MSTRG. 29242. 5 | 3668  | coding    | PF09457 |
| MSTRG. 29242. 6 | 2629  | coding    | PF09457 |
| MSTRG. 29246. 3 | 3178  | coding    | PF05024 |
| MSTRG. 29257. 4 | 627   | coding    | PF06080 |
| MSTRG. 29257. 2 | 800   | coding    | PF06080 |
| MSTRG. 29258. 1 | 1089  | coding    | PF14799 |
| MSTRG. 29258. 2 | 838   | coding    | PF14799 |
| MSTRG. 29258. 4 | 974   | coding    | PF14799 |
| MSTRG. 29258. 5 | 943   | coding    | PF14799 |
| MSTRG. 29258. 6 | 436   | noncoding | –       |
| MSTRG. 29258. 9 | 1017  | coding    | PF14799 |
| MSTRG. 29260. 1 | 1089  | noncoding | –       |
| MSTRG. 29262. 2 | 759   | noncoding | –       |
| MSTRG. 29254. 1 | 2443  | coding    | PF14739 |
| MSTRG. 29255. 4 | 1200  | coding    | PF16123 |
| MSTRG. 29268. 1 | 941   | noncoding | –       |
| MSTRG. 29271. 3 | 5891  | coding    | PF06762 |
| MSTRG. 29271. 5 | 3889  | coding    | PF06762 |
| MSTRG. 29276. 1 | 7903  | coding    | PF00520 |
| MSTRG. 29276. 3 | 7870  | coding    | PF00520 |
| MSTRG. 29278. 1 | 1350  | noncoding | –       |
| MSTRG. 29278. 2 | 1248  | noncoding | –       |
| MSTRG. 29278. 3 | 1169  | coding    | PF00168 |
| MSTRG. 29279. 2 | 648   | coding    | PF04034 |
| MSTRG. 29281. 3 | 4019  | noncoding | –       |
| MSTRG. 29282. 2 | 2504  | coding    | PF15450 |
| MSTRG. 29283. 2 | 11294 | noncoding | –       |
| MSTRG. 29283. 3 | 2391  | noncoding | –       |
| MSTRG. 29283. 4 | 8989  | noncoding | –       |
| MSTRG. 29283. 5 | 8719  | noncoding | –       |
| MSTRG. 29301. 1 | 391   | noncoding | –       |
| MSTRG. 29302. 3 | 3634  | noncoding | –       |
| MSTRG. 29302. 1 | 5053  | noncoding | –       |
| MSTRG. 29305. 2 | 7460  | noncoding | –       |
| MSTRG. 29305. 3 | 9761  | noncoding | –       |
| MSTRG. 29307. 3 | 3337  | noncoding | –       |
| MSTRG. 29308. 4 | 5483  | coding    | PF09744 |
| MSTRG. 29308. 5 | 8278  | coding    | PF09744 |
| MSTRG. 29308. 6 | 4652  | noncoding | –       |
| MSTRG. 29308. 7 | 4429  | noncoding | –       |
| MSTRG. 29293. 2 | 1345  | coding    | PF00333 |
| MSTRG. 29298. 1 | 1828  | noncoding | –       |
| MSTRG. 29325. 2 | 2500  | noncoding | –       |
| MSTRG. 29328. 7 | 1924  | coding    | PF00076 |
| MSTRG. 29328. 9 | 2275  | coding    | PF00076 |

|                  |       |           |         |
|------------------|-------|-----------|---------|
| MSTRG. 29328. 8  | 3782  | coding    | PF00076 |
| MSTRG. 29333. 2  | 6538  | coding    | PF00005 |
| MSTRG. 29334. 1  | 6630  | coding    | PF00005 |
| MSTRG. 29334. 5  | 2525  | noncoding | —       |
| MSTRG. 29341. 3  | 1347  | coding    | PF07969 |
| MSTRG. 29342. 1  | 7893  | coding    | PF14593 |
| MSTRG. 29342. 2  | 6986  | coding    | PF00069 |
| MSTRG. 29343. 1  | 8753  | noncoding | —       |
| MSTRG. 29342. 4  | 13566 | coding    | PF00069 |
| MSTRG. 29356. 21 | 7782  | noncoding | —       |
| MSTRG. 29356. 18 | 10127 | noncoding | —       |
| MSTRG. 29356. 9  | 8945  | noncoding | —       |
| MSTRG. 29356. 12 | 12087 | noncoding | —       |
| MSTRG. 29356. 13 | 8729  | noncoding | —       |
| MSTRG. 29356. 14 | 8684  | noncoding | —       |
| MSTRG. 29356. 16 | 9258  | noncoding | —       |
| MSTRG. 29356. 5  | 8705  | noncoding | —       |
| MSTRG. 29356. 6  | 9462  | noncoding | —       |
| MSTRG. 29356. 8  | 9369  | noncoding | —       |
| MSTRG. 29356. 15 | 9090  | noncoding | —       |
| MSTRG. 29356. 19 | 8780  | noncoding | —       |
| MSTRG. 29356. 22 | 12308 | noncoding | —       |
| MSTRG. 29356. 23 | 8602  | noncoding | —       |
| MSTRG. 29356. 24 | 10937 | noncoding | —       |
| MSTRG. 29347. 1  | 4742  | coding    | PF15423 |
| MSTRG. 29353. 1  | 676   | noncoding | —       |
| MSTRG. 29354. 1  | 1051  | coding    | PF15225 |
| MSTRG. 29359. 2  | 2708  | coding    | PF02023 |
| MSTRG. 29361. 1  | 653   | noncoding | —       |
| MSTRG. 29363. 1  | 455   | noncoding | —       |
| MSTRG. 29364. 1  | 963   | noncoding | —       |
| MSTRG. 29367. 2  | 2772  | coding    | PF02023 |
| MSTRG. 29370. 2  | 8243  | coding    | PF02023 |
| MSTRG. 29375. 2  | 2361  | noncoding | —       |
| MSTRG. 29376. 3  | 946   | coding    | PF15486 |
| MSTRG. 29387. 1  | 6727  | noncoding | —       |
| MSTRG. 29387. 6  | 6132  | noncoding | —       |
| MSTRG. 29389. 1  | 5873  | noncoding | —       |
| MSTRG. 29388. 6  | 1043  | noncoding | —       |
| MSTRG. 29378. 1  | 2275  | noncoding | —       |
| MSTRG. 29380. 1  | 13384 | noncoding | —       |
| MSTRG. 29379. 3  | 2530  | coding    | PF00211 |
| MSTRG. 29393. 3  | 1013  | coding    | PF03656 |
| MSTRG. 29393. 2  | 1090  | coding    | PF03656 |
| MSTRG. 29393. 4  | 825   | coding    | PF03656 |
| MSTRG. 29393. 5  | 871   | coding    | PF03656 |
| MSTRG. 29393. 6  | 612   | coding    | PF03656 |
| MSTRG. 29393. 7  | 1349  | noncoding | —       |
| MSTRG. 29405. 2  | 3530  | coding    | PF16300 |
| MSTRG. 29409. 2  | 934   | coding    | PF05368 |
| MSTRG. 29409. 3  | 2430  | coding    | PF05368 |
| MSTRG. 29411. 1  | 7708  | coding    | PF01126 |
| MSTRG. 29412. 1  | 5365  | coding    | PF16043 |
| MSTRG. 29417. 3  | 2352  | coding    | PF12796 |

|                 |      |           |         |
|-----------------|------|-----------|---------|
| MSTRG. 29417. 4 | 2332 | coding    | PF12796 |
| MSTRG. 29418. 4 | 2055 | coding    | PF15773 |
| MSTRG. 29420. 2 | 6723 | coding    | PF02023 |
| MSTRG. 29420. 1 | 2118 | coding    | PF02023 |
| MSTRG. 29425. 2 | 3912 | coding    | PF03446 |
| MSTRG. 29425. 5 | 3972 | coding    | PF03446 |
| MSTRG. 29425. 6 | 4099 | coding    | PF03446 |
| MSTRG. 29425. 7 | 4336 | coding    | PF03446 |
| MSTRG. 29426. 3 | 4251 | coding    | PF14075 |
| MSTRG. 29426. 4 | 4400 | coding    | PF14075 |
| MSTRG. 29426. 5 | 4250 | coding    | PF14075 |
| MSTRG. 29426. 6 | 4403 | coding    | PF14075 |
| MSTRG. 29395. 2 | 1461 | noncoding | —       |
| MSTRG. 29404. 5 | 1091 | coding    | PF10294 |
| MSTRG. 29404. 3 | 1053 | noncoding | —       |
| MSTRG. 29404. 6 | 1287 | coding    | PF10294 |
| MSTRG. 29404. 7 | 1289 | coding    | PF10294 |
| MSTRG. 29428. 3 | 4848 | coding    | PF00202 |
| MSTRG. 29436. 3 | 3543 | noncoding | —       |
| MSTRG. 29432. 3 | 4215 | coding    | PF12436 |
| MSTRG. 29445. 1 | 1290 | noncoding | —       |
| MSTRG. 29447. 1 | 6658 | noncoding | —       |
| MSTRG. 29447. 2 | 1916 | noncoding | —       |
| MSTRG. 29449. 1 | 1952 | noncoding | —       |
| MSTRG. 29450. 1 | 1174 | noncoding | —       |
| MSTRG. 29447. 6 | 6613 | noncoding | —       |
| MSTRG. 29447. 7 | 3291 | coding    | PF16794 |
| MSTRG. 29440. 2 | 1472 | coding    | PF03148 |
| MSTRG. 29455. 4 | 6563 | coding    | PF09758 |
| MSTRG. 29455. 6 | 3327 | coding    | PF09758 |
| MSTRG. 29455. 7 | 7656 | noncoding | —       |
| MSTRG. 29454. 1 | 643  | noncoding | —       |
| MSTRG. 29458. 1 | 746  | coding    | PF01254 |
| MSTRG. 29457. 2 | 607  | noncoding | —       |
| MSTRG. 29463. 1 | 3327 | coding    | PF10601 |
| MSTRG. 29463. 7 | 2007 | coding    | PF10601 |
| MSTRG. 29463. 6 | 2039 | coding    | PF10601 |
| MSTRG. 29466. 1 | 3247 | noncoding | —       |
| MSTRG. 29466. 3 | 3291 | noncoding | —       |
| MSTRG. 29467. 2 | 2887 | noncoding | —       |
| MSTRG. 29467. 3 | 2657 | noncoding | —       |
| MSTRG. 29467. 4 | 3401 | noncoding | —       |
| MSTRG. 29467. 5 | 1640 | noncoding | —       |
| MSTRG. 29481. 2 | 4901 | coding    | PF00787 |
| MSTRG. 29482. 2 | 2091 | noncoding | —       |
| MSTRG. 29481. 3 | 3375 | coding    | PF00787 |
| MSTRG. 29470. 1 | 1068 | noncoding | —       |
| MSTRG. 29470. 2 | 570  | noncoding | —       |
| MSTRG. 29471. 1 | 4589 | noncoding | —       |
| MSTRG. 29484. 1 | 282  | noncoding | —       |
| MSTRG. 29495. 2 | 2682 | coding    | PF15125 |
| MSTRG. 29495. 3 | 3982 | coding    | PF15125 |
| MSTRG. 29497. 1 | 3903 | noncoding | —       |
| MSTRG. 29499. 4 | 1198 | coding    | PF14736 |

|                  |       |           |         |
|------------------|-------|-----------|---------|
| MSTRG. 29497. 4  | 4076  | noncoding | -       |
| MSTRG. 29497. 3  | 4177  | noncoding | -       |
| MSTRG. 29500. 1  | 1196  | noncoding | -       |
| MSTRG. 29504. 3  | 7507  | coding    | PF11608 |
| MSTRG. 29504. 4  | 7473  | coding    | PF11608 |
| MSTRG. 29504. 2  | 7575  | coding    | PF11608 |
| MSTRG. 29506. 3  | 2750  | noncoding | -       |
| MSTRG. 29502. 2  | 1118  | noncoding | -       |
| MSTRG. 29502. 3  | 1021  | noncoding | -       |
| MSTRG. 29502. 4  | 2295  | noncoding | -       |
| MSTRG. 29509. 1  | 6538  | noncoding | -       |
| MSTRG. 29509. 2  | 6685  | noncoding | -       |
| MSTRG. 29509. 3  | 8797  | noncoding | -       |
| MSTRG. 29511. 2  | 2007  | coding    | PF12529 |
| MSTRG. 29511. 3  | 1873  | coding    | PF12529 |
| MSTRG. 29511. 4  | 1926  | coding    | PF12529 |
| MSTRG. 29511. 5  | 1790  | coding    | PF12529 |
| MSTRG. 29513. 1  | 603   | noncoding | -       |
| MSTRG. 29510. 1  | 299   | noncoding | -       |
| MSTRG. 29512. 1  | 284   | noncoding | -       |
| MSTRG. 29521. 2  | 995   | coding    | PF00410 |
| MSTRG. 29521. 3  | 2207  | noncoding | -       |
| MSTRG. 29521. 4  | 13473 | coding    | PF15785 |
| MSTRG. 29524. 1  | 847   | noncoding | -       |
| MSTRG. 29517. 1  | 7027  | noncoding | -       |
| MSTRG. 29525. 1  | 894   | coding    | PF03232 |
| MSTRG. 29525. 3  | 1288  | coding    | PF03232 |
| MSTRG. 29525. 4  | 903   | coding    | PF03232 |
| MSTRG. 29526. 1  | 825   | noncoding | -       |
| MSTRG. 29532. 5  | 4681  | coding    | PF16025 |
| MSTRG. 29533. 5  | 1225  | noncoding | -       |
| MSTRG. 29533. 6  | 961   | noncoding | -       |
| MSTRG. 29535. 2  | 1454  | noncoding | -       |
| MSTRG. 29535. 3  | 1570  | noncoding | -       |
| MSTRG. 29535. 5  | 1531  | noncoding | -       |
| MSTRG. 29535. 4  | 1717  | noncoding | -       |
| MSTRG. 29536. 1  | 2660  | noncoding | -       |
| MSTRG. 29530. 1  | 2364  | noncoding | -       |
| MSTRG. 29530. 3  | 3637  | coding    | PF13193 |
| MSTRG. 29531. 3  | 1513  | noncoding | -       |
| MSTRG. 29537. 3  | 22168 | coding    | PF02093 |
| MSTRG. 29537. 4  | 1782  | noncoding | -       |
| MSTRG. 29557. 1  | 21443 | noncoding | -       |
| MSTRG. 29557. 2  | 7315  | coding    | PF00501 |
| MSTRG. 29557. 3  | 6842  | coding    | PF00929 |
| MSTRG. 29557. 4  | 3905  | coding    | PF00929 |
| MSTRG. 29557. 5  | 4515  | coding    | PF00929 |
| MSTRG. 29557. 6  | 3884  | coding    | PF00929 |
| MSTRG. 29557. 7  | 2670  | coding    | PF00929 |
| MSTRG. 29557. 8  | 2630  | coding    | PF00929 |
| MSTRG. 29557. 10 | 2644  | coding    | PF00929 |
| MSTRG. 29558. 5  | 2747  | noncoding | -       |
| MSTRG. 29558. 6  | 868   | noncoding | -       |
| MSTRG. 29558. 7  | 1255  | noncoding | -       |

|                  |       |           |         |
|------------------|-------|-----------|---------|
| MSTRG. 29559. 3  | 1567  | coding    | PF03556 |
| MSTRG. 29559. 4  | 1702  | coding    | PF03556 |
| MSTRG. 29560. 1  | 3813  | noncoding | —       |
| MSTRG. 29561. 1  | 2408  | noncoding | —       |
| MSTRG. 29565. 1  | 12611 | coding    | PF03028 |
| MSTRG. 29566. 1  | 1395  | noncoding | —       |
| MSTRG. 29566. 2  | 5706  | noncoding | —       |
| MSTRG. 29567. 1  | 1554  | noncoding | —       |
| MSTRG. 29566. 3  | 4149  | noncoding | —       |
| MSTRG. 29544. 1  | 3448  | noncoding | —       |
| MSTRG. 29543. 2  | 4964  | coding    | PF00005 |
| MSTRG. 29545. 1  | 3196  | noncoding | —       |
| MSTRG. 29546. 1  | 1441  | noncoding | —       |
| MSTRG. 29550. 1  | 5107  | coding    | PF00005 |
| MSTRG. 29550. 2  | 6559  | coding    | PF00005 |
| MSTRG. 29551. 1  | 11023 | coding    | PF08079 |
| MSTRG. 29552. 2  | 4901  | coding    | PF00675 |
| MSTRG. 29553. 1  | 1766  | noncoding | —       |
| MSTRG. 29553. 2  | 1810  | noncoding | —       |
| MSTRG. 29553. 3  | 1620  | noncoding | —       |
| MSTRG. 29553. 4  | 1432  | noncoding | —       |
| MSTRG. 29553. 5  | 1584  | noncoding | —       |
| MSTRG. 29553. 6  | 1612  | noncoding | —       |
| MSTRG. 29553. 7  | 1443  | noncoding | —       |
| MSTRG. 29554. 2  | 1105  | noncoding | —       |
| MSTRG. 29556. 1  | 5550  | noncoding | —       |
| MSTRG. 29548. 2  | 5539  | coding    | PF13768 |
| MSTRG. 29548. 1  | 5382  | coding    | PF13768 |
| MSTRG. 29547. 1  | 1310  | noncoding | —       |
| MSTRG. 29571. 1  | 428   | noncoding | —       |
| MSTRG. 29576. 3  | 1905  | noncoding | —       |
| MSTRG. 29576. 4  | 2520  | noncoding | —       |
| MSTRG. 29578. 3  | 4561  | coding    | PF05219 |
| MSTRG. 29580. 1  | 373   | noncoding | —       |
| MSTRG. 29583. 2  | 10572 | coding    | PF00443 |
| MSTRG. 29583. 4  | 7415  | coding    | PF00443 |
| MSTRG. 29584. 1  | 1181  | noncoding | —       |
| MSTRG. 29585. 2  | 2152  | coding    | PF10191 |
| MSTRG. 29593. 2  | 9687  | coding    | PF00749 |
| MSTRG. 29594. 3  | 4895  | noncoding | —       |
| MSTRG. 29596. 1  | 772   | noncoding | —       |
| MSTRG. 29588. 2  | 2092  | coding    | PF00069 |
| MSTRG. 29598. 1  | 1928  | noncoding | —       |
| MSTRG. 29600. 2  | 9324  | coding    | PF00069 |
| MSTRG. 29601. 1  | 4908  | noncoding | —       |
| MSTRG. 29599. 1  | 375   | noncoding | —       |
| MSTRG. 29599. 2  | 366   | noncoding | —       |
| MSTRG. 29603. 3  | 9476  | coding    | PF08783 |
| MSTRG. 29607. 6  | 1749  | noncoding | —       |
| MSTRG. 29607. 11 | 606   | noncoding | —       |
| MSTRG. 29607. 10 | 6125  | coding    | PF16608 |
| MSTRG. 29607. 5  | 29646 | coding    | PF16608 |
| MSTRG. 29608. 1  | 3633  | noncoding | —       |
| MSTRG. 29620. 1  | 6844  | coding    | PF02023 |

|                  |      |           |         |
|------------------|------|-----------|---------|
| MSTRG. 29624. 1  | 455  | noncoding | —       |
| MSTRG. 29625. 1  | 692  | noncoding | —       |
| MSTRG. 29625. 2  | 835  | noncoding | —       |
| MSTRG. 29627. 1  | 592  | noncoding | —       |
| MSTRG. 29633. 2  | 1494 | noncoding | —       |
| MSTRG. 29634. 2  | 7222 | noncoding | —       |
| MSTRG. 29635. 2  | 6815 | coding    | PF14652 |
| MSTRG. 29652. 1  | 380  | noncoding | —       |
| MSTRG. 29654. 1  | 2542 | coding    | PF08916 |
| MSTRG. 29654. 4  | 4387 | coding    | PF08916 |
| MSTRG. 29654. 2  | 3104 | coding    | PF08916 |
| MSTRG. 29654. 5  | 2991 | coding    | PF08916 |
| MSTRG. 29657. 1  | 7411 | coding    | PF05470 |
| MSTRG. 29657. 4  | 7299 | coding    | PF05470 |
| MSTRG. 29657. 9  | 3342 | coding    | PF14438 |
| MSTRG. 29657. 11 | 3145 | coding    | PF05470 |
| MSTRG. 29644. 1  | 4036 | noncoding | —       |
| MSTRG. 29647. 2  | 5372 | coding    | PF01722 |
| MSTRG. 29647. 3  | 6004 | noncoding | —       |
| MSTRG. 29663. 2  | 849  | noncoding | —       |
| MSTRG. 29664. 2  | 1393 | coding    | PF00907 |
| MSTRG. 29666. 5  | 2377 | coding    | PF00274 |
| MSTRG. 29667. 1  | 1283 | noncoding | —       |
| MSTRG. 29667. 2  | 1293 | noncoding | —       |
| MSTRG. 29667. 3  | 1285 | noncoding | —       |
| MSTRG. 29667. 4  | 2126 | noncoding | —       |
| MSTRG. 29668. 3  | 1852 | noncoding | —       |
| MSTRG. 29672. 2  | 5915 | coding    | PF00069 |
| MSTRG. 29673. 1  | 1882 | noncoding | —       |
| MSTRG. 29673. 3  | 1021 | noncoding | —       |
| MSTRG. 29658. 7  | 823  | noncoding | —       |
| MSTRG. 29658. 5  | 919  | noncoding | —       |
| MSTRG. 29675. 2  | 3404 | coding    | PF15364 |
| MSTRG. 29675. 5  | 1768 | noncoding | —       |
| MSTRG. 29676. 2  | 1425 | noncoding | —       |
| MSTRG. 29676. 1  | 1483 | noncoding | —       |
| MSTRG. 29676. 3  | 2555 | noncoding | —       |
| MSTRG. 29676. 4  | 3128 | noncoding | —       |
| MSTRG. 29676. 5  | 2513 | noncoding | —       |
| MSTRG. 29676. 6  | 1802 | noncoding | —       |
| MSTRG. 29677. 3  | 1388 | noncoding | —       |
| MSTRG. 29677. 6  | 1315 | noncoding | —       |
| MSTRG. 29677. 8  | 2514 | noncoding | —       |
| MSTRG. 29677. 5  | 2528 | noncoding | —       |
| MSTRG. 29677. 7  | 2601 | noncoding | —       |
| MSTRG. 29677. 2  | 1843 | noncoding | —       |
| MSTRG. 29678. 3  | 2542 | coding    | PF00225 |
| MSTRG. 29678. 2  | 2567 | coding    | PF00225 |
| MSTRG. 29682. 4  | 1493 | coding    | PF02213 |
| MSTRG. 29687. 2  | 1463 | coding    | PF00735 |
| MSTRG. 29687. 3  | 1306 | coding    | PF00735 |
| MSTRG. 29681. 1  | 1777 | noncoding | —       |
| MSTRG. 29692. 2  | 2193 | noncoding | —       |
| MSTRG. 29692. 3  | 1357 | noncoding | —       |

|                  |       |           |         |
|------------------|-------|-----------|---------|
| MSTRG. 29693. 2  | 1083  | noncoding | -       |
| MSTRG. 29695. 2  | 3272  | noncoding | -       |
| MSTRG. 29696. 1  | 2376  | coding    | PF15386 |
| MSTRG. 29696. 2  | 2783  | noncoding | -       |
| MSTRG. 29696. 3  | 397   | noncoding | -       |
| MSTRG. 29704. 3  | 11205 | coding    | PF00176 |
| MSTRG. 29699. 3  | 584   | noncoding | -       |
| MSTRG. 29700. 1  | 1218  | noncoding | -       |
| MSTRG. 29700. 2  | 1055  | noncoding | -       |
| MSTRG. 29701. 3  | 295   | noncoding | -       |
| MSTRG. 29722. 1  | 1717  | noncoding | -       |
| MSTRG. 29722. 2  | 685   | noncoding | -       |
| MSTRG. 29723. 1  | 1337  | noncoding | -       |
| MSTRG. 29723. 3  | 1652  | noncoding | -       |
| MSTRG. 29724. 1  | 2215  | noncoding | -       |
| MSTRG. 29725. 1  | 1492  | noncoding | -       |
| MSTRG. 29726. 1  | 301   | noncoding | -       |
| MSTRG. 29724. 4  | 3165  | noncoding | -       |
| MSTRG. 29724. 5  | 4271  | noncoding | -       |
| MSTRG. 29724. 6  | 3204  | coding    | PF16866 |
| MSTRG. 29727. 1  | 749   | noncoding | -       |
| MSTRG. 29724. 7  | 4515  | coding    | PF16866 |
| MSTRG. 29724. 10 | 2717  | coding    | PF16866 |
| MSTRG. 29724. 11 | 3019  | coding    | PF16866 |
| MSTRG. 29730. 1  | 2363  | coding    | PF07856 |
| MSTRG. 29735. 6  | 5866  | noncoding | -       |
| MSTRG. 29707. 1  | 1801  | coding    | PF10436 |
| MSTRG. 29710. 1  | 1527  | noncoding | -       |
| MSTRG. 29713. 2  | 1537  | noncoding | -       |
| MSTRG. 29715. 3  | 3070  | noncoding | -       |
| MSTRG. 29738. 1  | 3005  | coding    | PF04884 |
| MSTRG. 29738. 2  | 2928  | coding    | PF04884 |
| MSTRG. 29738. 3  | 2614  | coding    | PF04884 |
| MSTRG. 29739. 1  | 2149  | coding    | PF00735 |
| MSTRG. 29741. 2  | 2462  | coding    | PF01352 |
| MSTRG. 29747. 1  | 1763  | coding    | PF00069 |
| MSTRG. 29748. 1  | 1268  | noncoding | -       |
| MSTRG. 29755. 2  | 2231  | coding    | PF02836 |
| MSTRG. 29756. 5  | 1779  | noncoding | -       |
| MSTRG. 29757. 1  | 800   | coding    | PF02836 |
| MSTRG. 29759. 1  | 4320  | coding    | PF03874 |
| MSTRG. 29758. 1  | 2212  | noncoding | -       |
| MSTRG. 29763. 1  | 4672  | coding    | PF02204 |
| MSTRG. 29763. 4  | 2878  | coding    | PF02214 |
| MSTRG. 29767. 1  | 1544  | coding    | PF01172 |
| MSTRG. 29767. 2  | 1317  | coding    | PF01172 |
| MSTRG. 29767. 3  | 1420  | coding    | PF01172 |
| MSTRG. 29767. 4  | 1151  | coding    | PF01172 |
| MSTRG. 29767. 5  | 2408  | coding    | PF01172 |
| MSTRG. 29773. 2  | 3358  | noncoding | -       |
| MSTRG. 29774. 1  | 1658  | coding    | PF13499 |
| MSTRG. 29774. 4  | 8208  | coding    | PF13499 |
| MSTRG. 29774. 10 | 11322 | coding    | PF13499 |
| MSTRG. 29774. 9  | 8485  | coding    | PF13499 |



|                  |       |           |         |
|------------------|-------|-----------|---------|
| MSTRG. 29774. 7  | 8456  | coding    | PF13499 |
| MSTRG. 29774. 12 | 8031  | coding    | PF13499 |
| MSTRG. 29774. 13 | 8499  | coding    | PF13499 |
| MSTRG. 29774. 15 | 8486  | coding    | PF13499 |
| MSTRG. 29776. 1  | 3838  | noncoding | —       |
| MSTRG. 29769. 2  | 1896  | coding    | PF00535 |
| MSTRG. 29849. 2  | 6255  | coding    | PF15336 |
| MSTRG. 29849. 4  | 6207  | coding    | PF15336 |
| MSTRG. 29849. 3  | 7006  | coding    | PF15336 |
| MSTRG. 29851. 1  | 6121  | noncoding | —       |
| MSTRG. 29852. 1  | 3413  | noncoding | —       |
| MSTRG. 29853. 1  | 21383 | noncoding | —       |
| MSTRG. 29854. 1  | 451   | noncoding | —       |
| MSTRG. 29856. 1  | 1699  | noncoding | —       |
| MSTRG. 29857. 1  | 43983 | noncoding | —       |
| MSTRG. 29858. 1  | 10797 | noncoding | —       |
| MSTRG. 29860. 1  | 4139  | noncoding | —       |
| MSTRG. 29861. 1  | 6847  | coding    | PF00078 |
| MSTRG. 29861. 2  | 6865  | coding    | PF00078 |
| MSTRG. 29861. 3  | 3458  | coding    | PF00078 |
| MSTRG. 29849. 5  | 73817 | noncoding | —       |
| MSTRG. 29849. 6  | 47030 | noncoding | —       |
| MSTRG. 29849. 7  | 33376 | noncoding | —       |
| MSTRG. 29849. 8  | 31545 | noncoding | —       |
| MSTRG. 29849. 9  | 29633 | noncoding | —       |
| MSTRG. 29849. 10 | 14733 | noncoding | —       |
| MSTRG. 29791. 15 | 2519  | coding    | PF02946 |
| MSTRG. 29791. 16 | 2828  | coding    | PF02946 |
| MSTRG. 29791. 7  | 3113  | coding    | PF02946 |
| MSTRG. 29791. 8  | 3901  | coding    | PF02946 |
| MSTRG. 29791. 13 | 6342  | coding    | PF02946 |
| MSTRG. 29791. 10 | 9027  | coding    | PF02946 |
| MSTRG. 29791. 11 | 3701  | coding    | PF02946 |
| MSTRG. 29791. 9  | 4058  | coding    | PF02946 |
| MSTRG. 29791. 17 | 6735  | coding    | PF02946 |
| MSTRG. 29791. 18 | 2072  | coding    | PF02946 |
| MSTRG. 29792. 1  | 2588  | noncoding | —       |
| MSTRG. 29786. 2  | 2952  | coding    | PF02946 |
| MSTRG. 29787. 1  | 4482  | noncoding | —       |
| MSTRG. 29787. 3  | 4291  | noncoding | —       |
| MSTRG. 29795. 2  | 871   | coding    | PF15164 |
| MSTRG. 29796. 1  | 880   | noncoding | —       |
| MSTRG. 29797. 3  | 1098  | coding    | PF08241 |
| MSTRG. 29799. 1  | 2304  | coding    | PF00804 |
| MSTRG. 29799. 2  | 1601  | coding    | PF00804 |
| MSTRG. 29799. 3  | 1505  | noncoding | —       |
| MSTRG. 29810. 3  | 2412  | noncoding | —       |
| MSTRG. 29810. 4  | 2488  | noncoding | —       |
| MSTRG. 29810. 7  | 2415  | noncoding | —       |
| MSTRG. 29810. 8  | 2289  | noncoding | —       |
| MSTRG. 29810. 6  | 4969  | noncoding | —       |
| MSTRG. 29810. 2  | 4861  | noncoding | —       |
| MSTRG. 29810. 9  | 4846  | noncoding | —       |
| MSTRG. 29800. 5  | 2628  | noncoding | —       |

|                 |       |           |         |
|-----------------|-------|-----------|---------|
| MSTRG. 29800.6  | 1755  | noncoding | -       |
| MSTRG. 29801.3  | 2339  | noncoding | -       |
| MSTRG. 29802.1  | 9400  | coding    | PF00439 |
| MSTRG. 29815.4  | 5401  | coding    | PF15229 |
| MSTRG. 29815.2  | 5235  | coding    | PF15229 |
| MSTRG. 29815.5  | 4963  | coding    | PF15229 |
| MSTRG. 29815.6  | 1738  | noncoding | -       |
| MSTRG. 29821.4  | 1877  | noncoding | -       |
| MSTRG. 29821.5  | 2123  | noncoding | -       |
| MSTRG. 29825.2  | 892   | coding    | PF00782 |
| MSTRG. 29825.3  | 1038  | coding    | PF00782 |
| MSTRG. 29827.1  | 2862  | noncoding | -       |
| MSTRG. 29830.1  | 2105  | coding    | PF00244 |
| MSTRG. 29830.2  | 2101  | coding    | PF00244 |
| MSTRG. 29834.1  | 3029  | coding    | PF00616 |
| MSTRG. 29835.2  | 552   | coding    | PF13656 |
| MSTRG. 29836.2  | 2199  | noncoding | -       |
| MSTRG. 29846.1  | 2904  | coding    | PF08172 |
| MSTRG. 29846.8  | 12831 | coding    | PF02376 |
| MSTRG. 29846.7  | 13656 | coding    | PF02376 |
| MSTRG. 29846.9  | 13813 | coding    | PF02376 |
| MSTRG. 29846.10 | 1134  | coding    | PF02376 |
| MSTRG. 29846.11 | 4003  | coding    | PF02376 |
| MSTRG. 29846.12 | 10577 | noncoding | -       |
| MSTRG. 29846.13 | 16546 | noncoding | -       |
| MSTRG. 29846.14 | 6615  | noncoding | -       |
| MSTRG. 29847.1  | 10779 | noncoding | -       |
| MSTRG. 29845.1  | 681   | noncoding | -       |
| MSTRG. 29868.1  | 3049  | noncoding | -       |
| MSTRG. 29869.1  | 4785  | noncoding | -       |
| MSTRG. 29869.3  | 1172  | noncoding | -       |
| MSTRG. 29869.5  | 4653  | noncoding | -       |
| MSTRG. 29869.4  | 1230  | noncoding | -       |
| MSTRG. 29869.6  | 3361  | noncoding | -       |
| MSTRG. 29869.7  | 5439  | noncoding | -       |
| MSTRG. 29866.2  | 261   | noncoding | -       |
| MSTRG. 29867.1  | 1829  | coding    | PF03982 |
| MSTRG. 29867.2  | 1728  | coding    | PF03982 |
| MSTRG. 29879.4  | 2508  | coding    | PF00135 |
| MSTRG. 29879.6  | 1968  | coding    | PF00135 |
| MSTRG. 29879.7  | 1882  | coding    | PF00135 |
| MSTRG. 29879.3  | 2345  | coding    | PF00135 |
| MSTRG. 29880.2  | 3380  | coding    | PF04959 |
| MSTRG. 29880.3  | 4374  | coding    | PF04959 |
| MSTRG. 29881.2  | 1295  | coding    | PF00412 |
| MSTRG. 29884.1  | 943   | noncoding | -       |
| MSTRG. 29884.2  | 971   | noncoding | -       |
| MSTRG. 29884.3  | 897   | coding    | PF12328 |
| MSTRG. 29885.3  | 5789  | coding    | PF02213 |
| MSTRG. 29890.4  | 978   | noncoding | -       |
| MSTRG. 29891.1  | 1287  | coding    | PF00431 |
| MSTRG. 29891.2  | 1682  | coding    | PF00431 |
| MSTRG. 29891.3  | 4529  | coding    | PF00431 |
| MSTRG. 29891.4  | 4460  | coding    | PF00431 |

|                |       |           |         |
|----------------|-------|-----------|---------|
| MSTRG. 29891.6 | 2123  | noncoding | -       |
| MSTRG. 29891.7 | 2261  | noncoding | -       |
| MSTRG. 29894.2 | 2198  | noncoding | -       |
| MSTRG. 29894.3 | 3463  | noncoding | -       |
| MSTRG. 29894.4 | 2649  | noncoding | -       |
| MSTRG. 29896.7 | 2710  | noncoding | -       |
| MSTRG. 29896.6 | 1530  | noncoding | -       |
| MSTRG. 29896.4 | 2180  | noncoding | -       |
| MSTRG. 29896.5 | 2006  | noncoding | -       |
| MSTRG. 29897.1 | 680   | noncoding | -       |
| MSTRG. 29897.2 | 1145  | noncoding | -       |
| MSTRG. 29897.3 | 730   | noncoding | -       |
| MSTRG. 29889.2 | 1262  | coding    | PF15775 |
| MSTRG. 29900.1 | 2410  | coding    | PF07496 |
| MSTRG. 29903.3 | 4483  | coding    | PF08514 |
| MSTRG. 29903.1 | 5568  | coding    | PF01153 |
| MSTRG. 29904.1 | 3264  | coding    | PF01153 |
| MSTRG. 29902.1 | 1867  | coding    | PF15806 |
| MSTRG. 29902.2 | 642   | noncoding | -       |
| MSTRG. 29902.3 | 737   | noncoding | -       |
| MSTRG. 29910.3 | 1657  | coding    | PF11938 |
| MSTRG. 29910.2 | 2033  | coding    | PF11938 |
| MSTRG. 29912.2 | 2340  | coding    | PF00928 |
| MSTRG. 29912.3 | 2553  | coding    | PF00928 |
| MSTRG. 29912.4 | 2590  | coding    | PF00928 |
| MSTRG. 29912.5 | 2687  | coding    | PF00928 |
| MSTRG. 29912.6 | 2377  | coding    | PF00928 |
| MSTRG. 29906.2 | 2592  | coding    | PF02023 |
| MSTRG. 29906.4 | 2742  | coding    | PF02023 |
| MSTRG. 29908.4 | 7721  | coding    | PF02023 |
| MSTRG. 29916.1 | 2489  | noncoding | -       |
| MSTRG. 29917.1 | 1459  | coding    | PF00067 |
| MSTRG. 29917.3 | 1404  | coding    | PF00067 |
| MSTRG. 29918.1 | 592   | noncoding | -       |
| MSTRG. 29920.1 | 14284 | coding    | PF02023 |
| MSTRG. 29923.5 | 1690  | noncoding | -       |
| MSTRG. 29923.6 | 1258  | noncoding | -       |
| MSTRG. 29921.1 | 1974  | noncoding | -       |
| MSTRG. 29921.4 | 1594  | coding    | PF01352 |
| MSTRG. 29921.5 | 1953  | coding    | PF01352 |
| MSTRG. 29926.3 | 4023  | coding    | PF02023 |
| MSTRG. 29926.2 | 4027  | coding    | PF02023 |
| MSTRG. 29927.3 | 2508  | noncoding | -       |
| MSTRG. 29934.4 | 1045  | coding    | PF01125 |
| MSTRG. 29934.5 | 925   | coding    | PF01125 |
| MSTRG. 29934.8 | 872   | coding    | PF01125 |
| MSTRG. 29941.3 | 4967  | coding    | PF00632 |
| MSTRG. 29941.4 | 5365  | coding    | PF00632 |
| MSTRG. 29943.5 | 2549  | noncoding | -       |
| MSTRG. 29943.3 | 10627 | noncoding | -       |
| MSTRG. 29943.2 | 12241 | noncoding | -       |
| MSTRG. 29943.4 | 12274 | noncoding | -       |
| MSTRG. 29938.1 | 527   | noncoding | -       |
| MSTRG. 29946.2 | 946   | coding    | PF10164 |

|                  |       |           |         |
|------------------|-------|-----------|---------|
| MSTRG. 29947. 1  | 730   | noncoding | -       |
| MSTRG. 29949. 1  | 1990  | noncoding | -       |
| MSTRG. 29948. 2  | 2075  | noncoding | -       |
| MSTRG. 29950. 4  | 7468  | noncoding | -       |
| MSTRG. 29950. 5  | 12450 | coding    | PF07714 |
| MSTRG. 29950. 6  | 11943 | coding    | PF07714 |
| MSTRG. 29965. 1  | 3938  | noncoding | -       |
| MSTRG. 29965. 5  | 3004  | noncoding | -       |
| MSTRG. 29967. 2  | 1524  | noncoding | -       |
| MSTRG. 29970. 1  | 5934  | coding    | PF00443 |
| MSTRG. 29970. 2  | 6090  | coding    | PF00443 |
| MSTRG. 29970. 3  | 4730  | coding    | PF00443 |
| MSTRG. 29970. 4  | 5606  | coding    | PF00443 |
| MSTRG. 29970. 5  | 4953  | coding    | PF00443 |
| MSTRG. 29970. 7  | 4395  | coding    | PF00443 |
| MSTRG. 29970. 8  | 4797  | coding    | PF00443 |
| MSTRG. 29970. 9  | 3553  | coding    | PF00443 |
| MSTRG. 29974. 3  | 4192  | coding    | PF01369 |
| MSTRG. 29974. 2  | 4075  | coding    | PF01369 |
| MSTRG. 29975. 1  | 2736  | noncoding | -       |
| MSTRG. 29954. 1  | 424   | noncoding | -       |
| MSTRG. 29955. 1  | 2684  | coding    | PF15118 |
| MSTRG. 29957. 2  | 4513  | noncoding | -       |
| MSTRG. 29961. 2  | 1441  | noncoding | -       |
| MSTRG. 29980. 5  | 14083 | coding    | PF01352 |
| MSTRG. 29978. 3  | 7467  | coding    | PF00607 |
| MSTRG. 29978. 1  | 2765  | coding    | PF00517 |
| MSTRG. 29978. 2  | 876   | noncoding | -       |
| MSTRG. 29985. 3  | 5414  | noncoding | -       |
| MSTRG. 29985. 4  | 6431  | noncoding | -       |
| MSTRG. 29990. 1  | 10618 | noncoding | -       |
| MSTRG. 29990. 2  | 10386 | noncoding | -       |
| MSTRG. 29990. 5  | 7157  | noncoding | -       |
| MSTRG. 29990. 6  | 10300 | noncoding | -       |
| MSTRG. 29990. 7  | 10317 | noncoding | -       |
| MSTRG. 29990. 8  | 9962  | noncoding | -       |
| MSTRG. 29990. 9  | 10440 | noncoding | -       |
| MSTRG. 29990. 10 | 11327 | noncoding | -       |
| MSTRG. 29991. 1  | 2554  | noncoding | -       |
| MSTRG. 29991. 2  | 1586  | noncoding | -       |
| MSTRG. 29997. 1  | 8506  | coding    | PF00250 |
| MSTRG. 29997. 2  | 7373  | coding    | PF00250 |
| MSTRG. 30003. 7  | 3127  | coding    | PF00041 |
| MSTRG. 30003. 2  | 4479  | coding    | PF00041 |
| MSTRG. 30003. 5  | 6417  | coding    | PF07679 |
| MSTRG. 30003. 4  | 7393  | coding    | PF07679 |
| MSTRG. 30003. 3  | 6938  | coding    | PF07679 |
| MSTRG. 30003. 6  | 6821  | coding    | PF07679 |
| MSTRG. 30003. 8  | 3795  | coding    | PF00041 |
| MSTRG. 30003. 9  | 1348  | noncoding | -       |
| MSTRG. 29998. 1  | 1114  | noncoding | -       |
| MSTRG. 29999. 1  | 1128  | noncoding | -       |
| MSTRG. 30009. 10 | 2320  | noncoding | -       |
| MSTRG. 30009. 11 | 1901  | noncoding | -       |

|                  |      |           |         |
|------------------|------|-----------|---------|
| MSTRG. 30009. 6  | 2003 | noncoding | —       |
| MSTRG. 30009. 7  | 2259 | noncoding | —       |
| MSTRG. 30009. 15 | 4818 | noncoding | —       |
| MSTRG. 30009. 8  | 4656 | noncoding | —       |
| MSTRG. 30009. 17 | 1993 | noncoding | —       |
| MSTRG. 30009. 18 | 2084 | noncoding | —       |
| MSTRG. 30009. 19 | 4868 | noncoding | —       |
| MSTRG. 30009. 20 | 1970 | noncoding | —       |
| MSTRG. 30009. 21 | 2102 | noncoding | —       |
| MSTRG. 30009. 22 | 1914 | noncoding | —       |
| MSTRG. 30009. 23 | 2405 | noncoding | —       |
| MSTRG. 30009. 24 | 1800 | noncoding | —       |
| MSTRG. 30005. 3  | 6579 | coding    | PF04906 |
| MSTRG. 30010. 3  | 4354 | coding    | PF00225 |
| MSTRG. 30010. 1  | 4540 | coding    | PF00225 |
| MSTRG. 30010. 2  | 4414 | coding    | PF00225 |
| MSTRG. 30011. 2  | 3377 | coding    | PF08662 |
| MSTRG. 30016. 2  | 3968 | coding    | PF00787 |
| MSTRG. 30016. 3  | 3853 | coding    | PF00787 |
| MSTRG. 30016. 5  | 1621 | coding    | PF00787 |
| MSTRG. 30016. 4  | 4638 | coding    | PF00787 |
| MSTRG. 30018. 1  | 733  | noncoding | —       |
| MSTRG. 30020. 2  | 4229 | coding    | PF01728 |
| MSTRG. 30020. 3  | 4860 | coding    | PF01728 |
| MSTRG. 30013. 1  | 2067 | noncoding | —       |
| MSTRG. 30014. 1  | 774  | noncoding | —       |
| MSTRG. 30014. 2  | 1252 | noncoding | —       |
| MSTRG. 30014. 3  | 1277 | noncoding | —       |
| MSTRG. 30014. 4  | 801  | noncoding | —       |
| MSTRG. 30024. 3  | 702  | coding    | PF10178 |
| MSTRG. 30033. 1  | 2272 | noncoding | —       |
| MSTRG. 30035. 2  | 3491 | noncoding | —       |
| MSTRG. 30036. 2  | 2711 | noncoding | —       |
| MSTRG. 30036. 3  | 4953 | noncoding | —       |
| MSTRG. 30036. 4  | 2622 | noncoding | —       |
| MSTRG. 30054. 11 | 6833 | coding    | PF09387 |
| MSTRG. 30054. 13 | 6892 | coding    | PF09387 |
| MSTRG. 30054. 2  | 6280 | coding    | PF09387 |
| MSTRG. 30054. 7  | 6183 | coding    | PF09387 |
| MSTRG. 30054. 8  | 3988 | coding    | PF09387 |
| MSTRG. 30054. 17 | 6287 | coding    | PF07738 |
| MSTRG. 30054. 19 | 1533 | coding    | PF09387 |
| MSTRG. 30054. 21 | 1877 | coding    | PF09387 |
| MSTRG. 30054. 20 | 4261 | coding    | PF09387 |
| MSTRG. 30054. 18 | 4142 | coding    | PF09387 |
| MSTRG. 30040. 2  | 2393 | coding    | PF00027 |
| MSTRG. 30040. 3  | 1514 | coding    | PF00027 |
| MSTRG. 30039. 1  | 2562 | coding    | PF04692 |
| MSTRG. 30046. 1  | 1041 | noncoding | —       |
| MSTRG. 30046. 2  | 988  | noncoding | —       |
| MSTRG. 30049. 3  | 2496 | coding    | PF02460 |
| MSTRG. 30049. 2  | 2326 | coding    | PF02460 |
| MSTRG. 30055. 1  | 1222 | noncoding | —       |
| MSTRG. 30064. 5  | 726  | noncoding | —       |

|               |       |           |         |
|---------------|-------|-----------|---------|
| MSTRG.30064.6 | 622   | noncoding | -       |
| MSTRG.30068.1 | 554   | noncoding | -       |
| MSTRG.30068.2 | 403   | noncoding | -       |
| MSTRG.30087.1 | 249   | noncoding | -       |
| MSTRG.30091.1 | 341   | noncoding | -       |
| MSTRG.30114.1 | 2547  | coding    | PF00076 |
| MSTRG.30114.3 | 2299  | coding    | PF00076 |
| MSTRG.30102.1 | 1101  | coding    | PF04734 |
| MSTRG.30102.2 | 2046  | coding    | PF04734 |
| MSTRG.30102.3 | 578   | coding    | PF17048 |
| MSTRG.30126.5 | 12551 | noncoding | -       |
| MSTRG.30127.1 | 1607  | noncoding | -       |
| MSTRG.30128.1 | 4195  | noncoding | -       |
| MSTRG.30129.1 | 7851  | noncoding | -       |
| MSTRG.30130.1 | 10413 | noncoding | -       |
| MSTRG.30132.1 | 1156  | noncoding | -       |
| MSTRG.30121.2 | 2285  | coding    | PF01747 |
| MSTRG.30122.3 | 350   | noncoding | -       |
| MSTRG.30124.1 | 687   | noncoding | -       |
| MSTRG.30123.2 | 10065 | coding    | PF10409 |
| MSTRG.30138.1 | 1341  | noncoding | -       |
| MSTRG.30143.1 | 1114  | noncoding | -       |
| MSTRG.30133.1 | 326   | noncoding | -       |
| MSTRG.30137.1 | 871   | coding    | PF01398 |
| MSTRG.30165.3 | 675   | noncoding | -       |
| MSTRG.30164.1 | 1941  | noncoding | -       |
| MSTRG.30164.2 | 1867  | noncoding | -       |
| MSTRG.30175.1 | 797   | noncoding | -       |
| MSTRG.30176.1 | 6522  | coding    | PF01359 |
| MSTRG.30177.1 | 3353  | coding    | PF00001 |
| MSTRG.30177.4 | 3460  | noncoding | -       |
| MSTRG.30178.1 | 5060  | noncoding | -       |
| MSTRG.30177.5 | 2570  | noncoding | -       |
| MSTRG.30177.6 | 3215  | noncoding | -       |
| MSTRG.30171.6 | 5871  | noncoding | -       |
| MSTRG.30174.1 | 553   | noncoding | -       |
| MSTRG.30182.1 | 1275  | noncoding | -       |
| MSTRG.30186.3 | 4525  | noncoding | -       |
| MSTRG.30190.2 | 7347  | coding    | PF12054 |
| MSTRG.30198.1 | 7680  | coding    | PF16367 |
| MSTRG.30198.3 | 1989  | coding    | PF16367 |
| MSTRG.30198.4 | 2324  | coding    | PF16367 |
| MSTRG.30199.2 | 5099  | coding    | PF12906 |
| MSTRG.30199.3 | 4723  | coding    | PF12906 |
| MSTRG.30204.1 | 6558  | noncoding | -       |
| MSTRG.30204.2 | 7247  | noncoding | -       |
| MSTRG.30189.2 | 2432  | coding    | PF13931 |
| MSTRG.30211.1 | 2017  | noncoding | -       |
| MSTRG.30212.3 | 1591  | noncoding | -       |
| MSTRG.30212.4 | 6604  | coding    | PF04091 |
| MSTRG.30213.1 | 1826  | noncoding | -       |
| MSTRG.30214.1 | 11133 | noncoding | -       |
| MSTRG.30215.2 | 6944  | coding    | PF08150 |
| MSTRG.30215.4 | 1355  | coding    | PF16165 |

|                  |       |           |         |
|------------------|-------|-----------|---------|
| MSTRG. 30216. 1  | 232   | noncoding | -       |
| MSTRG. 30217. 2  | 2079  | noncoding | -       |
| MSTRG. 30219. 1  | 2495  | coding    | PF00233 |
| MSTRG. 30227. 1  | 449   | noncoding | -       |
| MSTRG. 30227. 2  | 411   | noncoding | -       |
| MSTRG. 30240. 2  | 4322  | coding    | PF00387 |
| MSTRG. 30241. 1  | 4270  | coding    | PF00078 |
| MSTRG. 30245. 1  | 1186  | noncoding | -       |
| MSTRG. 30235. 1  | 1404  | coding    | PF00067 |
| MSTRG. 30239. 1  | 1808  | noncoding | -       |
| MSTRG. 30248. 3  | 1631  | coding    | PF00067 |
| MSTRG. 30248. 2  | 1656  | coding    | PF00067 |
| MSTRG. 30248. 4  | 279   | noncoding | -       |
| MSTRG. 30248. 5  | 333   | coding    | PF00067 |
| MSTRG. 30248. 7  | 1903  | coding    | PF00067 |
| MSTRG. 30248. 9  | 1756  | coding    | PF00067 |
| MSTRG. 30248. 8  | 3045  | coding    | PF00067 |
| MSTRG. 30249. 2  | 6093  | coding    | PF02208 |
| MSTRG. 30258. 2  | 5768  | coding    | PF15625 |
| MSTRG. 30258. 3  | 3219  | noncoding | -       |
| MSTRG. 30258. 4  | 6504  | coding    | PF15625 |
| MSTRG. 30260. 1  | 1178  | coding    | PF00078 |
| MSTRG. 30258. 5  | 2678  | coding    | PF01451 |
| MSTRG. 30252. 5  | 7731  | noncoding | -       |
| MSTRG. 30271. 2  | 5184  | coding    | PF02990 |
| MSTRG. 30271. 3  | 4773  | coding    | PF02990 |
| MSTRG. 30272. 1  | 1284  | noncoding | -       |
| MSTRG. 30275. 2  | 13406 | coding    | PF15090 |
| MSTRG. 30275. 6  | 10365 | noncoding | -       |
| MSTRG. 30275. 7  | 15774 | coding    | PF15090 |
| MSTRG. 30275. 8  | 2214  | noncoding | -       |
| MSTRG. 30275. 9  | 2843  | noncoding | -       |
| MSTRG. 30275. 12 | 1683  | coding    | PF00078 |
| MSTRG. 30278. 1  | 4741  | noncoding | -       |
| MSTRG. 30264. 3  | 5427  | coding    | PF00620 |
| MSTRG. 30265. 1  | 1595  | noncoding | -       |
| MSTRG. 30281. 1  | 2681  | coding    | PF01529 |
| MSTRG. 30281. 2  | 3057  | coding    | PF01529 |
| MSTRG. 30282. 2  | 3399  | coding    | PF14500 |
| MSTRG. 30282. 3  | 3499  | coding    | PF14500 |
| MSTRG. 30287. 2  | 1405  | coding    | PF16455 |
| MSTRG. 30287. 4  | 1309  | coding    | PF16455 |
| MSTRG. 30288. 2  | 1356  | coding    | PF12796 |
| MSTRG. 30290. 1  | 3243  | noncoding | -       |
| MSTRG. 30291. 5  | 1215  | noncoding | -       |
| MSTRG. 30291. 4  | 904   | noncoding | -       |
| MSTRG. 30291. 6  | 935   | noncoding | -       |
| MSTRG. 30283. 1  | 685   | noncoding | -       |
| MSTRG. 30302. 5  | 1270  | noncoding | -       |
| MSTRG. 30315. 3  | 1407  | coding    | PF00153 |
| MSTRG. 30315. 2  | 1602  | coding    | PF00153 |
| MSTRG. 30315. 4  | 1540  | coding    | PF00153 |
| MSTRG. 30315. 5  | 1446  | coding    | PF00153 |
| MSTRG. 30320. 1  | 4425  | coding    | PF02628 |

|                 |      |           |         |
|-----------------|------|-----------|---------|
| MSTRG. 30321.3  | 1433 | coding    | PF03932 |
| MSTRG. 30321.4  | 1560 | coding    | PF03932 |
| MSTRG. 30321.5  | 1564 | coding    | PF03932 |
| MSTRG. 30321.6  | 1385 | coding    | PF03932 |
| MSTRG. 30321.7  | 1162 | coding    | PF03932 |
| MSTRG. 30312.1  | 382  | noncoding | —       |
| MSTRG. 30313.1  | 5234 | noncoding | —       |
| MSTRG. 30325.2  | 3654 | coding    | PF00069 |
| MSTRG. 30326.1  | 1662 | coding    | PF04677 |
| MSTRG. 30326.2  | 1300 | noncoding | —       |
| MSTRG. 30322.3  | 721  | noncoding | —       |
| MSTRG. 30329.2  | 5335 | noncoding | —       |
| MSTRG. 30331.2  | 4116 | noncoding | —       |
| MSTRG. 30332.2  | 647  | coding    | PF05821 |
| MSTRG. 30332.3  | 892  | coding    | PF05821 |
| MSTRG. 30343.1  | 6649 | coding    | PF14816 |
| MSTRG. 30343.6  | 5224 | noncoding | —       |
| MSTRG. 30343.4  | 6440 | coding    | PF14816 |
| MSTRG. 30344.1  | 4896 | coding    | PF01403 |
| MSTRG. 30345.1  | 684  | noncoding | —       |
| MSTRG. 30348.1  | 310  | noncoding | —       |
| MSTRG. 30350.5  | 1171 | noncoding | —       |
| MSTRG. 30354.2  | 1810 | noncoding | —       |
| MSTRG. 30357.2  | 4310 | coding    | PF07555 |
| MSTRG. 30359.5  | 1319 | coding    | PF08427 |
| MSTRG. 30359.6  | 2115 | coding    | PF08427 |
| MSTRG. 30361.7  | 3033 | noncoding | —       |
| MSTRG. 30361.2  | 3163 | noncoding | —       |
| MSTRG. 30361.9  | 2542 | noncoding | —       |
| MSTRG. 30361.11 | 2907 | noncoding | —       |
| MSTRG. 30361.5  | 5560 | noncoding | —       |
| MSTRG. 30361.4  | 4114 | noncoding | —       |
| MSTRG. 30361.14 | 2524 | noncoding | —       |
| MSTRG. 30361.15 | 2239 | noncoding | —       |
| MSTRG. 30361.12 | 2251 | noncoding | —       |
| MSTRG. 30361.6  | 2966 | noncoding | —       |
| MSTRG. 30361.16 | 4860 | noncoding | —       |
| MSTRG. 30362.5  | 5351 | noncoding | —       |
| MSTRG. 30363.8  | 7224 | coding    | PF01369 |
| MSTRG. 30363.3  | 6494 | coding    | PF01369 |
| MSTRG. 30363.5  | 6395 | coding    | PF01369 |
| MSTRG. 30363.6  | 6398 | coding    | PF01369 |
| MSTRG. 30363.2  | 6668 | coding    | PF01369 |
| MSTRG. 30363.4  | 6566 | coding    | PF01369 |
| MSTRG. 30363.7  | 6569 | coding    | PF01369 |
| MSTRG. 30365.1  | 1973 | coding    | PF15410 |
| MSTRG. 30367.1  | 1684 | noncoding | —       |
| MSTRG. 30367.4  | 1282 | noncoding | —       |
| MSTRG. 30368.7  | 1038 | noncoding | —       |
| MSTRG. 30368.4  | 1190 | noncoding | —       |
| MSTRG. 30368.9  | 1181 | noncoding | —       |
| MSTRG. 30368.10 | 1158 | noncoding | —       |
| MSTRG. 30375.1  | 4672 | noncoding | —       |
| MSTRG. 30375.5  | 2666 | noncoding | —       |



|                 |       |           |         |
|-----------------|-------|-----------|---------|
| MSTRG. 30375.6  | 2649  | noncoding | —       |
| MSTRG. 30375.9  | 4752  | noncoding | —       |
| MSTRG. 30375.7  | 2987  | noncoding | —       |
| MSTRG. 30375.8  | 2964  | noncoding | —       |
| MSTRG. 30375.12 | 2372  | noncoding | —       |
| MSTRG. 30375.11 | 6169  | noncoding | —       |
| MSTRG. 30375.14 | 2175  | noncoding | —       |
| MSTRG. 30375.15 | 2322  | noncoding | —       |
| MSTRG. 30378.1  | 5077  | coding    | PF12470 |
| MSTRG. 30371.1  | 1837  | noncoding | —       |
| MSTRG. 30371.2  | 814   | noncoding | —       |
| MSTRG. 30372.1  | 418   | noncoding | —       |
| MSTRG. 30382.2  | 419   | noncoding | —       |
| MSTRG. 30386.3  | 2171  | coding    | PF00067 |
| MSTRG. 30388.1  | 327   | noncoding | —       |
| MSTRG. 30386.5  | 2087  | coding    | PF00067 |
| MSTRG. 30386.6  | 1434  | coding    | PF00067 |
| MSTRG. 30386.8  | 1771  | coding    | PF00067 |
| MSTRG. 30393.2  | 3221  | coding    | PF05761 |
| MSTRG. 30393.8  | 2552  | coding    | PF05761 |
| MSTRG. 30393.5  | 2616  | coding    | PF05761 |
| MSTRG. 30393.9  | 2932  | coding    | PF05761 |
| MSTRG. 30393.7  | 2553  | coding    | PF05761 |
| MSTRG. 30393.3  | 2874  | coding    | PF05761 |
| MSTRG. 30394.1  | 3838  | noncoding | —       |
| MSTRG. 30395.1  | 2231  | noncoding | —       |
| MSTRG. 30398.2  | 990   | coding    | PF14960 |
| MSTRG. 30398.3  | 830   | coding    | PF14960 |
| MSTRG. 30399.3  | 5959  | noncoding | —       |
| MSTRG. 30403.3  | 10408 | noncoding | —       |
| MSTRG. 30403.4  | 10384 | noncoding | —       |
| MSTRG. 30403.5  | 4679  | noncoding | —       |
| MSTRG. 30403.6  | 6845  | noncoding | —       |
| MSTRG. 30404.1  | 559   | noncoding | —       |
| MSTRG. 30416.1  | 1001  | noncoding | —       |
| MSTRG. 30419.5  | 3114  | noncoding | —       |
| MSTRG. 30409.1  | 1180  | coding    | PF13417 |
| MSTRG. 30409.2  | 1008  | coding    | PF13417 |
| MSTRG. 30410.1  | 472   | noncoding | —       |
| MSTRG. 30411.3  | 1184  | coding    | PF13417 |
| MSTRG. 30411.4  | 1199  | coding    | PF13417 |
| MSTRG. 30411.2  | 1144  | coding    | PF13417 |
| MSTRG. 30411.6  | 1131  | coding    | PF13417 |
| MSTRG. 30411.5  | 1551  | coding    | PF13417 |
| MSTRG. 30408.1  | 1544  | noncoding | —       |
| MSTRG. 30436.1  | 2115  | coding    | PF00530 |
| MSTRG. 30437.1  | 1956  | noncoding | —       |
| MSTRG. 30438.1  | 5729  | coding    | PF15902 |
| MSTRG. 30439.1  | 13213 | noncoding | —       |
| MSTRG. 30442.1  | 3485  | coding    | PF00530 |
| MSTRG. 30442.2  | 614   | noncoding | —       |
| MSTRG. 30442.3  | 476   | noncoding | —       |
| MSTRG. 30444.2  | 3458  | noncoding | —       |
| MSTRG. 30445.2  | 2112  | coding    | PF01593 |

|                  |       |           |         |
|------------------|-------|-----------|---------|
| MSTRG. 30448. 1  | 4915  | coding    | PF15314 |
| MSTRG. 30451. 1  | 783   | coding    | PF00046 |
| MSTRG. 30453. 3  | 3387  | coding    | PF04130 |
| MSTRG. 30453. 4  | 3383  | coding    | PF04130 |
| MSTRG. 30453. 5  | 4710  | coding    | PF04130 |
| MSTRG. 30456. 2  | 756   | noncoding | —       |
| MSTRG. 30456. 1  | 978   | coding    | PF06294 |
| MSTRG. 30456. 7  | 1023  | noncoding | —       |
| MSTRG. 30456. 4  | 1183  | noncoding | —       |
| MSTRG. 30438. 2  | 974   | noncoding | —       |
| MSTRG. 30426. 1  | 462   | noncoding | —       |
| MSTRG. 30467. 1  | 507   | noncoding | —       |
| MSTRG. 30469. 1  | 321   | noncoding | —       |
| MSTRG. 30483. 1  | 1501  | noncoding | —       |
| MSTRG. 30496. 1  | 5874  | noncoding | —       |
| MSTRG. 30496. 2  | 9911  | noncoding | —       |
| MSTRG. 30497. 1  | 3978  | noncoding | —       |
| MSTRG. 30497. 2  | 4088  | coding    | PF00078 |
| MSTRG. 30496. 3  | 13586 | noncoding | —       |
| MSTRG. 30473. 1  | 852   | noncoding | —       |
| MSTRG. 30475. 10 | 13244 | coding    | PF00596 |
| MSTRG. 30475. 11 | 5260  | coding    | PF00596 |
| MSTRG. 30476. 1  | 769   | noncoding | —       |
| MSTRG. 30479. 1  | 1025  | noncoding | —       |
| MSTRG. 30481. 1  | 1750  | coding    | PF06003 |
| MSTRG. 30481. 2  | 3606  | coding    | PF06003 |
| MSTRG. 30481. 3  | 898   | coding    | PF06003 |
| MSTRG. 30477. 2  | 1893  | coding    | PF00782 |
| MSTRG. 30503. 1  | 7301  | noncoding | —       |
| MSTRG. 30505. 4  | 1358  | noncoding | —       |
| MSTRG. 30506. 1  | 3372  | noncoding | —       |
| MSTRG. 30506. 4  | 2266  | coding    | PF14777 |
| MSTRG. 30507. 2  | 4352  | noncoding | —       |
| MSTRG. 30518. 1  | 2676  | coding    | PF00501 |
| MSTRG. 30518. 2  | 2597  | coding    | PF00501 |
| MSTRG. 30518. 6  | 2620  | coding    | PF00501 |
| MSTRG. 30517. 2  | 2256  | coding    | PF01529 |
| MSTRG. 30522. 5  | 7163  | noncoding | —       |
| MSTRG. 30522. 6  | 5643  | coding    | PF08347 |
| MSTRG. 30523. 1  | 18491 | noncoding | —       |
| MSTRG. 30524. 1  | 5876  | noncoding | —       |
| MSTRG. 30525. 1  | 7015  | noncoding | —       |
| MSTRG. 30529. 1  | 3864  | noncoding | —       |
| MSTRG. 30530. 1  | 5720  | noncoding | —       |
| MSTRG. 30530. 2  | 4390  | noncoding | —       |
| MSTRG. 30530. 3  | 1989  | noncoding | —       |
| MSTRG. 30531. 3  | 7062  | noncoding | —       |
| MSTRG. 30536. 1  | 376   | noncoding | —       |
| MSTRG. 30539. 1  | 1558  | noncoding | —       |
| MSTRG. 30534. 2  | 1345  | coding    | PF01509 |
| MSTRG. 30534. 3  | 1614  | coding    | PF01509 |
| MSTRG. 30534. 4  | 4708  | noncoding | —       |
| MSTRG. 30547. 1  | 1574  | coding    | PF00431 |
| MSTRG. 30547. 2  | 8921  | coding    | PF00059 |

|                  |       |           |         |
|------------------|-------|-----------|---------|
| MSTRG. 30547. 6  | 3403  | coding    | PF00059 |
| MSTRG. 30547. 5  | 3307  | coding    | PF00059 |
| MSTRG. 30547. 7  | 6367  | coding    | PF00059 |
| MSTRG. 30548. 1  | 3924  | noncoding | —       |
| MSTRG. 30548. 2  | 8423  | noncoding | —       |
| MSTRG. 30548. 3  | 843   | noncoding | —       |
| MSTRG. 30549. 1  | 4583  | noncoding | —       |
| MSTRG. 30550. 1  | 3165  | noncoding | —       |
| MSTRG. 30551. 1  | 2364  | noncoding | —       |
| MSTRG. 30553. 1  | 2445  | noncoding | —       |
| MSTRG. 30554. 1  | 3351  | noncoding | —       |
| MSTRG. 30555. 1  | 1506  | noncoding | —       |
| MSTRG. 30556. 1  | 2391  | coding    | PF00226 |
| MSTRG. 30556. 2  | 1539  | coding    | PF00226 |
| MSTRG. 30545. 1  | 318   | noncoding | —       |
| MSTRG. 30559. 1  | 1248  | noncoding | —       |
| MSTRG. 30559. 3  | 1110  | noncoding | —       |
| MSTRG. 30561. 2  | 2272  | noncoding | —       |
| MSTRG. 30561. 3  | 7329  | noncoding | —       |
| MSTRG. 30562. 2  | 3414  | noncoding | —       |
| MSTRG. 30565. 1  | 8182  | noncoding | —       |
| MSTRG. 30565. 2  | 9904  | noncoding | —       |
| MSTRG. 30565. 4  | 3923  | noncoding | —       |
| MSTRG. 30566. 1  | 1267  | noncoding | —       |
| MSTRG. 30569. 1  | 4089  | noncoding | —       |
| MSTRG. 30571. 1  | 465   | noncoding | —       |
| MSTRG. 30572. 1  | 736   | noncoding | —       |
| MSTRG. 30575. 1  | 3916  | coding    | PF09457 |
| MSTRG. 30575. 2  | 2462  | coding    | PF09457 |
| MSTRG. 30575. 3  | 1092  | coding    | PF09457 |
| MSTRG. 30575. 5  | 2332  | coding    | PF09457 |
| MSTRG. 30576. 1  | 684   | noncoding | —       |
| MSTRG. 30583. 2  | 6872  | noncoding | —       |
| MSTRG. 30583. 3  | 5066  | noncoding | —       |
| MSTRG. 30583. 4  | 4960  | noncoding | —       |
| MSTRG. 30584. 1  | 4063  | noncoding | —       |
| MSTRG. 30595. 3  | 4868  | coding    | PF00076 |
| MSTRG. 30595. 5  | 1434  | coding    | PF00076 |
| MSTRG. 30595. 4  | 1464  | coding    | PF00076 |
| MSTRG. 30596. 1  | 4665  | coding    | PF02383 |
| MSTRG. 30597. 1  | 2122  | coding    | PF09739 |
| MSTRG. 30597. 3  | 2815  | coding    | PF09739 |
| MSTRG. 30597. 5  | 2170  | coding    | PF09739 |
| MSTRG. 30599. 4  | 12264 | coding    | PF02862 |
| MSTRG. 30614. 8  | 3333  | coding    | PF07714 |
| MSTRG. 30616. 7  | 5825  | coding    | PF04377 |
| MSTRG. 30616. 3  | 5148  | coding    | PF04377 |
| MSTRG. 30616. 6  | 5148  | coding    | PF04377 |
| MSTRG. 30617. 1  | 5582  | noncoding | —       |
| MSTRG. 30616. 8  | 1400  | coding    | PF04377 |
| MSTRG. 30616. 9  | 15066 | noncoding | —       |
| MSTRG. 30616. 10 | 18157 | noncoding | —       |
| MSTRG. 30618. 1  | 518   | noncoding | —       |
| MSTRG. 30620. 1  | 1501  | coding    | PF08743 |

|                  |       |           |         |
|------------------|-------|-----------|---------|
| MSTRG. 30620. 3  | 1221  | coding    | PF08743 |
| MSTRG. 30623. 4  | 2520  | coding    | PF05010 |
| MSTRG. 30623. 5  | 7750  | coding    | PF05010 |
| MSTRG. 30624. 1  | 641   | noncoding | —       |
| MSTRG. 30625. 1  | 1954  | noncoding | —       |
| MSTRG. 30625. 2  | 2100  | noncoding | —       |
| MSTRG. 30625. 3  | 2078  | noncoding | —       |
| MSTRG. 30625. 4  | 2325  | noncoding | —       |
| MSTRG. 30625. 5  | 2051  | noncoding | —       |
| MSTRG. 30625. 6  | 2066  | noncoding | —       |
| MSTRG. 30628. 1  | 468   | noncoding | —       |
| MSTRG. 30631. 2  | 900   | noncoding | —       |
| MSTRG. 30643. 1  | 2407  | noncoding | —       |
| MSTRG. 30645. 3  | 1349  | noncoding | —       |
| MSTRG. 30646. 1  | 6960  | coding    | PF00078 |
| MSTRG. 30646. 2  | 9726  | noncoding | —       |
| MSTRG. 30637. 1  | 783   | noncoding | —       |
| MSTRG. 30654. 4  | 3095  | noncoding | —       |
| MSTRG. 30657. 1  | 546   | noncoding | —       |
| MSTRG. 30658. 2  | 2918  | coding    | PF00202 |
| MSTRG. 30658. 3  | 3187  | coding    | PF00202 |
| MSTRG. 30658. 4  | 2379  | coding    | PF00202 |
| MSTRG. 30669. 1  | 793   | noncoding | —       |
| MSTRG. 30668. 5  | 1621  | noncoding | —       |
| MSTRG. 30668. 3  | 2752  | noncoding | —       |
| MSTRG. 30668. 4  | 2882  | coding    | PF02338 |
| MSTRG. 30668. 6  | 2397  | coding    | PF02338 |
| MSTRG. 30670. 1  | 1619  | noncoding | —       |
| MSTRG. 30671. 10 | 3930  | noncoding | —       |
| MSTRG. 30676. 4  | 1521  | coding    | PF12796 |
| MSTRG. 30678. 1  | 6130  | coding    | PF01421 |
| MSTRG. 30685. 1  | 4701  | coding    | PF15309 |
| MSTRG. 30685. 4  | 4103  | coding    | PF15309 |
| MSTRG. 30685. 5  | 4823  | coding    | PF15309 |
| MSTRG. 30685. 6  | 4699  | coding    | PF15309 |
| MSTRG. 30685. 7  | 5598  | coding    | PF15309 |
| MSTRG. 30685. 8  | 2350  | noncoding | —       |
| MSTRG. 30685. 9  | 13262 | noncoding | —       |
| MSTRG. 30685. 10 | 17052 | noncoding | —       |
| MSTRG. 30685. 11 | 2224  | noncoding | —       |
| MSTRG. 30685. 12 | 14699 | noncoding | —       |
| MSTRG. 30685. 13 | 7253  | noncoding | —       |
| MSTRG. 30685. 14 | 10175 | noncoding | —       |
| MSTRG. 30685. 15 | 6773  | noncoding | —       |
| MSTRG. 30688. 1  | 787   | noncoding | —       |
| MSTRG. 30688. 2  | 2374  | noncoding | —       |
| MSTRG. 30693. 1  | 11852 | coding    | PF08065 |
| MSTRG. 30693. 6  | 6414  | coding    | PF08065 |
| MSTRG. 30693. 2  | 9788  | coding    | PF08065 |
| MSTRG. 30693. 3  | 9788  | coding    | PF08065 |
| MSTRG. 30693. 4  | 9788  | coding    | PF08065 |
| MSTRG. 30693. 7  | 11234 | coding    | PF08065 |
| MSTRG. 30693. 9  | 9430  | coding    | PF08065 |
| MSTRG. 30695. 1  | 432   | noncoding | —       |

|                |       |           |         |
|----------------|-------|-----------|---------|
| MSTRG.30698.1  | 601   | noncoding | -       |
| MSTRG.30698.2  | 395   | noncoding | -       |
| MSTRG.30699.1  | 777   | noncoding | -       |
| MSTRG.30701.1  | 3092  | noncoding | -       |
| MSTRG.30703.1  | 1717  | noncoding | -       |
| MSTRG.30703.2  | 1337  | noncoding | -       |
| MSTRG.30704.1  | 1820  | noncoding | -       |
| MSTRG.30705.2  | 1065  | noncoding | -       |
| MSTRG.30706.1  | 732   | noncoding | -       |
| MSTRG.30712.1  | 1810  | noncoding | -       |
| MSTRG.30712.2  | 1974  | noncoding | -       |
| MSTRG.30716.1  | 3488  | coding    | PF00617 |
| MSTRG.30718.1  | 10259 | noncoding | -       |
| MSTRG.30718.2  | 7699  | noncoding | -       |
| MSTRG.30719.1  | 819   | noncoding | -       |
| MSTRG.30720.5  | 958   | noncoding | -       |
| MSTRG.30720.4  | 2300  | noncoding | -       |
| MSTRG.30720.3  | 2287  | noncoding | -       |
| MSTRG.30720.2  | 1389  | noncoding | -       |
| MSTRG.30736.1  | 8267  | noncoding | -       |
| MSTRG.30736.3  | 6788  | noncoding | -       |
| MSTRG.30736.4  | 7575  | noncoding | -       |
| MSTRG.30737.1  | 364   | noncoding | -       |
| MSTRG.30725.2  | 3463  | noncoding | -       |
| MSTRG.30727.1  | 916   | noncoding | -       |
| MSTRG.30728.1  | 2377  | noncoding | -       |
| MSTRG.30740.1  | 1429  | coding    | PF06553 |
| MSTRG.30741.1  | 398   | noncoding | -       |
| MSTRG.30743.6  | 1642  | noncoding | -       |
| MSTRG.30743.4  | 1269  | noncoding | -       |
| MSTRG.30743.8  | 1180  | noncoding | -       |
| MSTRG.30743.9  | 2017  | noncoding | -       |
| MSTRG.30743.10 | 2361  | noncoding | -       |
| MSTRG.30743.7  | 3631  | noncoding | -       |
| MSTRG.30747.5  | 3266  | coding    | PF01534 |
| MSTRG.30747.6  | 2529  | coding    | PF01534 |
| MSTRG.30758.2  | 1520  | noncoding | -       |
| MSTRG.30759.1  | 835   | noncoding | -       |
| MSTRG.30760.1  | 1583  | noncoding | -       |
| MSTRG.30760.3  | 2292  | noncoding | -       |
| MSTRG.30760.4  | 8813  | noncoding | -       |
| MSTRG.30760.5  | 3059  | coding    | PF03359 |
| MSTRG.30760.2  | 7766  | coding    | PF03359 |
| MSTRG.30762.1  | 5143  | coding    | PF00078 |
| MSTRG.30763.1  | 4857  | noncoding | -       |
| MSTRG.30760.7  | 18873 | noncoding | -       |
| MSTRG.30760.8  | 2921  | noncoding | -       |
| MSTRG.30765.1  | 2745  | noncoding | -       |
| MSTRG.30768.1  | 203   | noncoding | -       |
| MSTRG.30771.1  | 4301  | noncoding | -       |
| MSTRG.30772.1  | 5520  | noncoding | -       |
| MSTRG.30772.2  | 5349  | noncoding | -       |
| MSTRG.30753.7  | 6106  | coding    | PF00621 |
| MSTRG.30757.1  | 2997  | noncoding | -       |

|               |       |           |         |
|---------------|-------|-----------|---------|
| MSTRG.30774.1 | 4151  | coding    | PF00431 |
| MSTRG.30776.1 | 567   | noncoding | —       |
| MSTRG.30787.1 | 3049  | coding    | PF00147 |
| MSTRG.30791.1 | 239   | noncoding | —       |
| MSTRG.30792.2 | 1084  | coding    | PF05324 |
| MSTRG.30793.1 | 493   | noncoding | —       |
| MSTRG.30792.3 | 3017  | noncoding | —       |
| MSTRG.30792.4 | 3946  | noncoding | —       |
| MSTRG.30792.5 | 565   | noncoding | —       |
| MSTRG.30792.6 | 448   | noncoding | —       |
| MSTRG.30794.1 | 472   | noncoding | —       |
| MSTRG.30795.4 | 5310  | coding    | PF01352 |
| MSTRG.30831.1 | 699   | noncoding | —       |
| MSTRG.30832.2 | 416   | noncoding | —       |
| MSTRG.30798.1 | 362   | noncoding | —       |
| MSTRG.30801.1 | 387   | noncoding | —       |
| MSTRG.30802.1 | 690   | noncoding | —       |
| MSTRG.30803.2 | 656   | coding    | PF00711 |
| MSTRG.30805.2 | 3344  | coding    | PF01275 |
| MSTRG.30805.4 | 2471  | coding    | PF01275 |
| MSTRG.30806.1 | 2282  | noncoding | —       |
| MSTRG.30807.1 | 4266  | noncoding | —       |
| MSTRG.30808.1 | 16030 | noncoding | —       |
| MSTRG.30808.2 | 4553  | coding    | PF00078 |
| MSTRG.30805.6 | 4459  | noncoding | —       |
| MSTRG.30809.1 | 841   | noncoding | —       |
| MSTRG.30812.1 | 1674  | noncoding | —       |
| MSTRG.30812.2 | 4325  | noncoding | —       |
| MSTRG.30812.4 | 4059  | noncoding | —       |
| MSTRG.30815.2 | 259   | noncoding | —       |
| MSTRG.30817.1 | 7727  | noncoding | —       |
| MSTRG.30826.2 | 2112  | coding    | PF01112 |
| MSTRG.30826.3 | 2090  | coding    | PF01112 |
| MSTRG.30826.5 | 1615  | coding    | PF01112 |
| MSTRG.30826.6 | 4581  | coding    | PF01112 |
| MSTRG.30833.1 | 629   | noncoding | —       |
| MSTRG.30866.1 | 1323  | noncoding | —       |
| MSTRG.30867.1 | 5702  | noncoding | —       |
| MSTRG.30866.2 | 1064  | noncoding | —       |
| MSTRG.30868.1 | 9456  | noncoding | —       |
| MSTRG.30866.3 | 6508  | noncoding | —       |
| MSTRG.30866.4 | 2621  | noncoding | —       |
| MSTRG.30866.5 | 16177 | noncoding | —       |
| MSTRG.30866.6 | 9949  | noncoding | —       |
| MSTRG.30866.7 | 5214  | coding    | PF00078 |
| MSTRG.30866.8 | 10825 | coding    | PF00078 |
| MSTRG.30835.1 | 2952  | noncoding | —       |
| MSTRG.30836.1 | 2331  | noncoding | —       |
| MSTRG.30836.4 | 2631  | noncoding | —       |
| MSTRG.30836.3 | 1943  | noncoding | —       |
| MSTRG.30836.2 | 2936  | noncoding | —       |
| MSTRG.30836.5 | 1621  | noncoding | —       |
| MSTRG.30836.6 | 1722  | noncoding | —       |
| MSTRG.30837.1 | 1230  | noncoding | —       |

|                  |       |           |         |
|------------------|-------|-----------|---------|
| MSTRG. 30889. 5  | 4267  | coding    | PF06484 |
| MSTRG. 30889. 7  | 8249  | coding    | PF06484 |
| MSTRG. 30889. 10 | 7831  | noncoding | —       |
| MSTRG. 30889. 14 | 4424  | noncoding | —       |
| MSTRG. 30892. 1  | 2922  | noncoding | —       |
| MSTRG. 30892. 2  | 3615  | noncoding | —       |
| MSTRG. 30892. 3  | 1501  | noncoding | —       |
| MSTRG. 30892. 4  | 8105  | noncoding | —       |
| MSTRG. 30893. 1  | 7206  | noncoding | —       |
| MSTRG. 30894. 1  | 24353 | noncoding | —       |
| MSTRG. 30889. 16 | 3650  | noncoding | —       |
| MSTRG. 30889. 17 | 22243 | noncoding | —       |
| MSTRG. 30895. 1  | 1144  | noncoding | —       |
| MSTRG. 30889. 19 | 1514  | coding    | PF06484 |
| MSTRG. 30889. 18 | 3863  | coding    | PF06484 |
| MSTRG. 30896. 1  | 1605  | noncoding | —       |
| MSTRG. 30889. 20 | 3182  | coding    | PF06484 |
| MSTRG. 30897. 1  | 2311  | noncoding | —       |
| MSTRG. 30889. 21 | 3654  | coding    | PF15636 |
| MSTRG. 30871. 1  | 1473  | noncoding | —       |
| MSTRG. 30874. 1  | 4087  | noncoding | —       |
| MSTRG. 30874. 2  | 10047 | noncoding | —       |
| MSTRG. 30876. 3  | 993   | noncoding | —       |
| MSTRG. 30877. 4  | 4475  | coding    | PF11817 |
| MSTRG. 30877. 6  | 3738  | coding    | PF11817 |
| MSTRG. 30878. 2  | 9166  | coding    | PF10264 |
| MSTRG. 30878. 3  | 11921 | coding    | PF10264 |
| MSTRG. 30880. 2  | 5098  | coding    | PF01663 |
| MSTRG. 30883. 2  | 1098  | coding    | PF00605 |
| MSTRG. 30882. 1  | 457   | noncoding | —       |
| MSTRG. 30888. 2  | 1181  | coding    | PF13097 |
| MSTRG. 30899. 2  | 1902  | coding    | PF00153 |
| MSTRG. 30900. 4  | 4355  | noncoding | —       |
| MSTRG. 30900. 5  | 5072  | noncoding | —       |
| MSTRG. 30900. 6  | 6234  | noncoding | —       |
| MSTRG. 30900. 9  | 4118  | noncoding | —       |
| MSTRG. 30900. 7  | 4582  | noncoding | —       |
| MSTRG. 30900. 8  | 5150  | noncoding | —       |
| MSTRG. 30900. 10 | 4766  | noncoding | —       |
| MSTRG. 30905. 4  | 3081  | coding    | PF08628 |
| MSTRG. 30906. 1  | 345   | noncoding | —       |
| MSTRG. 30907. 2  | 1599  | coding    | PF07910 |
| MSTRG. 30908. 1  | 2061  | coding    | PF15239 |
| MSTRG. 30909. 1  | 3600  | noncoding | —       |
| MSTRG. 30909. 2  | 2893  | noncoding | —       |
| MSTRG. 30909. 3  | 2799  | noncoding | —       |
| MSTRG. 30909. 4  | 3887  | noncoding | —       |
| MSTRG. 30909. 5  | 3769  | noncoding | —       |
| MSTRG. 30909. 6  | 3727  | noncoding | —       |
| MSTRG. 30910. 2  | 5075  | coding    | PF02208 |
| MSTRG. 30910. 3  | 5002  | coding    | PF02208 |
| MSTRG. 30910. 4  | 4790  | coding    | PF02208 |
| MSTRG. 30910. 5  | 9927  | coding    | PF02208 |
| MSTRG. 30910. 8  | 7829  | coding    | PF02208 |

|                  |      |           |         |
|------------------|------|-----------|---------|
| MSTRG. 30910. 9  | 5143 | noncoding | —       |
| MSTRG. 30911. 3  | 735  | noncoding | —       |
| MSTRG. 30914. 1  | 224  | noncoding | —       |
| MSTRG. 30920. 1  | 1010 | coding    | PF01200 |
| MSTRG. 30937. 1  | 1667 | noncoding | —       |
| MSTRG. 30937. 2  | 1217 | noncoding | —       |
| MSTRG. 30937. 5  | 1656 | noncoding | —       |
| MSTRG. 30937. 6  | 5735 | noncoding | —       |
| MSTRG. 30937. 7  | 9844 | noncoding | —       |
| MSTRG. 30937. 8  | 2392 | noncoding | —       |
| MSTRG. 30937. 9  | 3509 | noncoding | —       |
| MSTRG. 30937. 10 | 4147 | noncoding | —       |
| MSTRG. 30939. 1  | 1046 | noncoding | —       |
| MSTRG. 30943. 1  | 1402 | coding    | PF13765 |
| MSTRG. 30922. 1  | 1139 | noncoding | —       |
| MSTRG. 30922. 2  | 1088 | noncoding | —       |
| MSTRG. 30922. 3  | 1758 | noncoding | —       |
| MSTRG. 30945. 1  | 1790 | noncoding | —       |
| MSTRG. 30948. 11 | 2726 | coding    | PF15717 |
| MSTRG. 30948. 8  | 5095 | coding    | PF15717 |
| MSTRG. 30948. 18 | 6004 | coding    | PF15717 |
| MSTRG. 30948. 12 | 6626 | coding    | PF15717 |
| MSTRG. 30948. 13 | 6786 | coding    | PF15717 |
| MSTRG. 30948. 14 | 6744 | coding    | PF15717 |
| MSTRG. 30948. 15 | 7654 | coding    | PF15717 |
| MSTRG. 30948. 16 | 6452 | coding    | PF15717 |
| MSTRG. 30948. 9  | 6715 | coding    | PF15717 |
| MSTRG. 30948. 7  | 6921 | coding    | PF15717 |
| MSTRG. 30948. 10 | 6971 | coding    | PF15717 |
| MSTRG. 30948. 17 | 6693 | coding    | PF15717 |
| MSTRG. 30948. 6  | 6810 | coding    | PF15717 |
| MSTRG. 30948. 19 | 2228 | coding    | PF15717 |
| MSTRG. 30949. 1  | 2839 | noncoding | —       |
| MSTRG. 30950. 2  | 5594 | coding    | PF00147 |
| MSTRG. 30951. 1  | 246  | noncoding | —       |
| MSTRG. 30952. 1  | 274  | noncoding | —       |
| MSTRG. 30950. 5  | 3476 | noncoding | —       |
| MSTRG. 30950. 7  | 3583 | noncoding | —       |
| MSTRG. 30929. 3  | 3562 | coding    | PF13906 |
| MSTRG. 30961. 3  | 2863 | noncoding | —       |
| MSTRG. 30961. 4  | 2687 | noncoding | —       |
| MSTRG. 30965. 1  | 3216 | noncoding | —       |
| MSTRG. 30965. 2  | 3797 | noncoding | —       |
| MSTRG. 30965. 3  | 3530 | noncoding | —       |
| MSTRG. 30965. 4  | 3554 | noncoding | —       |
| MSTRG. 30965. 6  | 5089 | noncoding | —       |
| MSTRG. 30965. 5  | 5218 | noncoding | —       |
| MSTRG. 30966. 1  | 731  | noncoding | —       |
| MSTRG. 30965. 8  | 1634 | noncoding | —       |
| MSTRG. 30965. 9  | 4724 | noncoding | —       |
| MSTRG. 30965. 10 | 3680 | noncoding | —       |
| MSTRG. 30967. 1  | 923  | noncoding | —       |
| MSTRG. 30967. 3  | 1327 | noncoding | —       |
| MSTRG. 30971. 1  | 607  | noncoding | —       |



|                 |       |           |         |
|-----------------|-------|-----------|---------|
| MSTRG. 30971.2  | 617   | noncoding | -       |
| MSTRG. 30968.1  | 372   | noncoding | -       |
| MSTRG. 31004.1  | 1549  | coding    | PF15379 |
| MSTRG. 31004.2  | 1365  | coding    | PF15379 |
| MSTRG. 31004.4  | 1366  | coding    | PF15379 |
| MSTRG. 31004.5  | 1535  | coding    | PF15379 |
| MSTRG. 31006.1  | 2004  | noncoding | -       |
| MSTRG. 31007.1  | 3510  | noncoding | -       |
| MSTRG. 31011.1  | 1066  | noncoding | -       |
| MSTRG. 31011.2  | 915   | noncoding | -       |
| MSTRG. 31011.3  | 1065  | noncoding | -       |
| MSTRG. 31011.4  | 749   | noncoding | -       |
| MSTRG. 31011.5  | 982   | noncoding | -       |
| MSTRG. 31015.3  | 20943 | coding    | PF00078 |
| MSTRG. 31015.4  | 34467 | noncoding | -       |
| MSTRG. 31015.5  | 11683 | noncoding | -       |
| MSTRG. 31015.6  | 30581 | noncoding | -       |
| MSTRG. 31021.2  | 1918  | noncoding | -       |
| MSTRG. 31019.1  | 368   | noncoding | -       |
| MSTRG. 31027.1  | 2000  | noncoding | -       |
| MSTRG. 31029.2  | 2100  | coding    | PF06682 |
| MSTRG. 31030.1  | 3704  | coding    | PF04133 |
| MSTRG. 31035.1  | 1623  | noncoding | -       |
| MSTRG. 31035.4  | 937   | noncoding | -       |
| MSTRG. 31035.3  | 1134  | noncoding | -       |
| MSTRG. 31035.5  | 1338  | noncoding | -       |
| MSTRG. 31035.6  | 1545  | noncoding | -       |
| MSTRG. 31035.7  | 1165  | noncoding | -       |
| MSTRG. 31035.8  | 1341  | noncoding | -       |
| MSTRG. 31031.1  | 999   | noncoding | -       |
| MSTRG. 31036.2  | 4852  | coding    | PF02186 |
| MSTRG. 31043.1  | 1705  | coding    | PF00149 |
| MSTRG. 31044.1  | 970   | noncoding | -       |
| MSTRG. 31045.13 | 3164  | coding    | PF12509 |
| MSTRG. 31045.4  | 9373  | coding    | PF15326 |
| MSTRG. 31045.7  | 8792  | coding    | PF15326 |
| MSTRG. 31045.11 | 8969  | coding    | PF15326 |
| MSTRG. 31045.15 | 9055  | coding    | PF15326 |
| MSTRG. 31045.16 | 1549  | coding    | PF12509 |
| MSTRG. 31045.8  | 8927  | coding    | PF15326 |
| MSTRG. 31045.14 | 1266  | coding    | PF12509 |
| MSTRG. 31045.12 | 8679  | coding    | PF15326 |
| MSTRG. 31045.9  | 8724  | coding    | PF15326 |
| MSTRG. 31045.10 | 1276  | coding    | PF12509 |
| MSTRG. 31045.6  | 8782  | coding    | PF15326 |
| MSTRG. 31046.1  | 1535  | noncoding | -       |
| MSTRG. 31047.1  | 5227  | noncoding | -       |
| MSTRG. 31051.1  | 4830  | noncoding | -       |
| MSTRG. 31052.1  | 8530  | noncoding | -       |
| MSTRG. 31053.5  | 3917  | coding    | PF09382 |
| MSTRG. 31058.1  | 4935  | coding    | PF02158 |
| MSTRG. 31071.1  | 940   | noncoding | -       |
| MSTRG. 31071.2  | 792   | noncoding | -       |
| MSTRG. 31083.2  | 3206  | coding    | PF03493 |

|                |       |           |         |
|----------------|-------|-----------|---------|
| MSTRG. 31105.3 | 4788  | coding    | PF09457 |
| MSTRG. 31105.4 | 5264  | coding    | PF09457 |
| MSTRG. 31111.2 | 1002  | noncoding | —       |
| MSTRG. 31112.1 | 1747  | noncoding | —       |
| MSTRG. 31116.2 | 1800  | noncoding | —       |
| MSTRG. 31116.3 | 6591  | coding    | PF00856 |
| MSTRG. 31116.4 | 11669 | coding    | PF00856 |
| MSTRG. 31116.5 | 5377  | coding    | PF00856 |
| MSTRG. 31117.1 | 549   | noncoding | —       |
| MSTRG. 31117.2 | 650   | noncoding | —       |
| MSTRG. 31116.6 | 2734  | noncoding | —       |
| MSTRG. 31119.2 | 2696  | coding    | PF07766 |
| MSTRG. 31120.8 | 2993  | coding    | PF07714 |
| MSTRG. 31121.1 | 914   | noncoding | —       |
| MSTRG. 31122.4 | 9044  | noncoding | —       |
| MSTRG. 31122.3 | 6752  | coding    | PF05010 |
| MSTRG. 31114.4 | 4849  | noncoding | —       |
| MSTRG. 31125.1 | 3141  | noncoding | —       |
| MSTRG. 31125.2 | 2500  | noncoding | —       |
| MSTRG. 31128.3 | 4121  | coding    | PF00200 |
| MSTRG. 31132.3 | 2298  | coding    | PF01421 |
| MSTRG. 31134.3 | 1031  | noncoding | —       |
| MSTRG. 31134.4 | 460   | noncoding | —       |
| MSTRG. 31134.5 | 756   | noncoding | —       |
| MSTRG. 31134.6 | 2108  | noncoding | —       |
| MSTRG. 31133.1 | 549   | noncoding | —       |
| MSTRG. 31142.2 | 2762  | coding    | PF16922 |
| MSTRG. 31143.2 | 2942  | noncoding | —       |
| MSTRG. 31143.3 | 2932  | noncoding | —       |
| MSTRG. 31146.1 | 7746  | coding    | PF12796 |
| MSTRG. 31146.2 | 1665  | noncoding | —       |
| MSTRG. 31146.4 | 1217  | noncoding | —       |
| MSTRG. 31146.3 | 1123  | noncoding | —       |
| MSTRG. 31146.5 | 1197  | noncoding | —       |
| MSTRG. 31148.2 | 8408  | coding    | PF01853 |
| MSTRG. 31149.2 | 3886  | noncoding | —       |
| MSTRG. 31144.1 | 3336  | coding    | PF00928 |
| MSTRG. 31144.2 | 3129  | coding    | PF00928 |
| MSTRG. 31144.5 | 2388  | noncoding | —       |
| MSTRG. 31144.6 | 1170  | noncoding | —       |
| MSTRG. 31145.2 | 2478  | coding    | PF00089 |
| MSTRG. 31157.1 | 551   | noncoding | —       |
| MSTRG. 31157.2 | 511   | noncoding | —       |
| MSTRG. 31158.2 | 1365  | coding    | PF14792 |
| MSTRG. 31158.3 | 1417  | coding    | PF14792 |
| MSTRG. 31158.4 | 1241  | coding    | PF14792 |
| MSTRG. 31159.1 | 2010  | noncoding | —       |
| MSTRG. 31160.2 | 1791  | coding    | PF01459 |
| MSTRG. 31160.3 | 3042  | coding    | PF01459 |
| MSTRG. 31160.4 | 1532  | coding    | PF01459 |
| MSTRG. 31161.1 | 809   | noncoding | —       |
| MSTRG. 31165.1 | 2229  | coding    | PF15117 |
| MSTRG. 31165.3 | 1617  | coding    | PF15117 |
| MSTRG. 31155.1 | 694   | noncoding | —       |

|                |       |           |         |
|----------------|-------|-----------|---------|
| MSTRG. 31155.2 | 463   | noncoding | –       |
| MSTRG. 31156.1 | 3312  | coding    | PF02931 |
| MSTRG. 31167.1 | 3582  | coding    | PF05485 |
| MSTRG. 31167.2 | 967   | coding    | PF05485 |
| MSTRG. 31169.5 | 3576  | coding    | PF05622 |
| MSTRG. 31169.6 | 3511  | coding    | PF05622 |
| MSTRG. 31169.7 | 11861 | coding    | PF05622 |
| MSTRG. 31171.1 | 3298  | noncoding | –       |
| MSTRG. 31172.3 | 2174  | noncoding | –       |
| MSTRG. 31175.2 | 7781  | coding    | PF01369 |
| MSTRG. 31175.3 | 4682  | coding    | PF01369 |
| MSTRG. 31174.1 | 706   | noncoding | –       |
| MSTRG. 31187.3 | 3103  | coding    | PF04721 |
| MSTRG. 31188.4 | 5217  | coding    | PF00521 |
| MSTRG. 31189.2 | 2708  | coding    | PF00104 |
| MSTRG. 31189.3 | 3021  | coding    | PF00105 |
| MSTRG. 31189.4 | 2474  | coding    | PF00104 |
| MSTRG. 31193.1 | 551   | noncoding | –       |
| MSTRG. 31194.1 | 8619  | noncoding | –       |
| MSTRG. 31196.2 | 4254  | noncoding | –       |
| MSTRG. 31196.1 | 4525  | noncoding | –       |
| MSTRG. 31197.1 | 2253  | noncoding | –       |
| MSTRG. 31201.1 | 1046  | noncoding | –       |
| MSTRG. 31202.1 | 1281  | noncoding | –       |
| MSTRG. 31205.1 | 1415  | noncoding | –       |
| MSTRG. 31210.1 | 1699  | noncoding | –       |
| MSTRG. 31211.1 | 6287  | coding    | PF00105 |
| MSTRG. 31215.1 | 5328  | coding    | PF00105 |
| MSTRG. 31215.2 | 5119  | coding    | PF00105 |
| MSTRG. 31218.2 | 1156  | coding    | PF00827 |
| MSTRG. 31219.2 | 1201  | noncoding | –       |
| MSTRG. 31222.3 | 1270  | coding    | PF00179 |
| MSTRG. 31223.1 | 3164  | noncoding | –       |
| MSTRG. 31231.2 | 3843  | noncoding | –       |
| MSTRG. 31231.3 | 655   | coding    | PF00179 |
| MSTRG. 31231.4 | 823   | coding    | PF00179 |
| MSTRG. 31231.5 | 384   | noncoding | –       |
| MSTRG. 31231.6 | 5954  | noncoding | –       |
| MSTRG. 31233.1 | 8154  | noncoding | –       |
| MSTRG. 31235.1 | 4167  | noncoding | –       |
| MSTRG. 31236.1 | 9182  | noncoding | –       |
| MSTRG. 31237.1 | 35985 | noncoding | –       |
| MSTRG. 31238.1 | 9300  | noncoding | –       |
| MSTRG. 31231.7 | 8261  | noncoding | –       |
| MSTRG. 31239.1 | 17044 | noncoding | –       |
| MSTRG. 31240.1 | 12417 | noncoding | –       |
| MSTRG. 31241.1 | 2050  | noncoding | –       |
| MSTRG. 31242.1 | 5405  | noncoding | –       |
| MSTRG. 31240.2 | 9035  | noncoding | –       |
| MSTRG. 31244.1 | 7092  | noncoding | –       |
| MSTRG. 31244.2 | 4217  | noncoding | –       |
| MSTRG. 31245.2 | 1608  | noncoding | –       |
| MSTRG. 31230.1 | 212   | noncoding | –       |
| MSTRG. 31246.1 | 503   | noncoding | –       |

|                 |       |           |         |
|-----------------|-------|-----------|---------|
| MSTRG. 31246.2  | 657   | noncoding | -       |
| MSTRG. 31247.2  | 744   | noncoding | -       |
| MSTRG. 31251.1  | 4542  | noncoding | -       |
| MSTRG. 31251.3  | 1007  | noncoding | -       |
| MSTRG. 31251.2  | 1353  | noncoding | -       |
| MSTRG. 31251.4  | 4079  | noncoding | -       |
| MSTRG. 31251.5  | 657   | noncoding | -       |
| MSTRG. 31271.1  | 1105  | noncoding | -       |
| MSTRG. 31271.2  | 1808  | noncoding | -       |
| MSTRG. 31263.1  | 1641  | coding    | PF00517 |
| MSTRG. 31273.1  | 4249  | noncoding | -       |
| MSTRG. 31278.3  | 1376  | coding    | PF00071 |
| MSTRG. 31278.4  | 1326  | coding    | PF00071 |
| MSTRG. 31278.5  | 4193  | coding    | PF00071 |
| MSTRG. 31279.1  | 2147  | noncoding | -       |
| MSTRG. 31286.4  | 475   | noncoding | -       |
| MSTRG. 31287.3  | 13717 | coding    | PF10441 |
| MSTRG. 31285.1  | 2974  | coding    | PF00517 |
| MSTRG. 31289.1  | 12891 | noncoding | -       |
| MSTRG. 31291.1  | 4125  | noncoding | -       |
| MSTRG. 31301.1  | 5283  | coding    | PF00069 |
| MSTRG. 31301.2  | 807   | noncoding | -       |
| MSTRG. 31301.3  | 7351  | coding    | PF00069 |
| MSTRG. 31301.4  | 5211  | coding    | PF00069 |
| MSTRG. 31301.5  | 5218  | coding    | PF00069 |
| MSTRG. 31301.6  | 3614  | noncoding | -       |
| MSTRG. 31301.7  | 2431  | noncoding | -       |
| MSTRG. 31307.1  | 857   | noncoding | -       |
| MSTRG. 31316.2  | 2461  | noncoding | -       |
| MSTRG. 31317.1  | 702   | noncoding | -       |
| MSTRG. 31320.1  | 3865  | noncoding | -       |
| MSTRG. 31320.3  | 3977  | coding    | PF00069 |
| MSTRG. 31320.2  | 5039  | coding    | PF00069 |
| MSTRG. 31320.7  | 2950  | noncoding | -       |
| MSTRG. 31320.4  | 4589  | coding    | PF00069 |
| MSTRG. 31320.5  | 4202  | coding    | PF00069 |
| MSTRG. 31320.6  | 4349  | coding    | PF00069 |
| MSTRG. 31320.8  | 2928  | coding    | PF00069 |
| MSTRG. 31320.9  | 3683  | coding    | PF00069 |
| MSTRG. 31320.10 | 6217  | coding    | PF00069 |
| MSTRG. 31320.11 | 4238  | noncoding | -       |
| MSTRG. 31320.12 | 7971  | coding    | PF00069 |
| MSTRG. 31304.1  | 205   | noncoding | -       |
| MSTRG. 31324.2  | 1348  | coding    | PF04161 |
| MSTRG. 31333.2  | 2341  | coding    | PF10263 |
| MSTRG. 31336.3  | 2751  | noncoding | -       |
| MSTRG. 31337.1  | 3423  | noncoding | -       |
| MSTRG. 31341.1  | 844   | noncoding | -       |
| MSTRG. 31347.1  | 3735  | noncoding | -       |
| MSTRG. 31348.1  | 766   | noncoding | -       |
| MSTRG. 31350.2  | 16916 | coding    | PF07714 |
| MSTRG. 31351.3  | 2866  | coding    | PF11261 |
| MSTRG. 31363.1  | 386   | noncoding | -       |
| MSTRG. 31364.5  | 10781 | noncoding | -       |

|                 |       |           |         |
|-----------------|-------|-----------|---------|
| MSTRG. 31364.6  | 4661  | noncoding | -       |
| MSTRG. 31365.1  | 1464  | coding    | PF00348 |
| MSTRG. 31367.2  | 2250  | coding    | PF01762 |
| MSTRG. 31371.1  | 1450  | noncoding | -       |
| MSTRG. 31372.2  | 5821  | coding    | PF07474 |
| MSTRG. 31374.1  | 544   | noncoding | -       |
| MSTRG. 31375.1  | 3496  | noncoding | -       |
| MSTRG. 31376.1  | 4754  | noncoding | -       |
| MSTRG. 31378.4  | 1968  | coding    | PF04137 |
| MSTRG. 31379.1  | 1292  | noncoding | -       |
| MSTRG. 31380.2  | 6085  | coding    | PF00337 |
| MSTRG. 31380.5  | 6196  | coding    | PF00337 |
| MSTRG. 31381.1  | 7578  | coding    | PF08146 |
| MSTRG. 31383.1  | 1177  | coding    | PF08726 |
| MSTRG. 31384.2  | 10302 | coding    | PF02965 |
| MSTRG. 31385.1  | 1172  | noncoding | -       |
| MSTRG. 31386.1  | 654   | noncoding | -       |
| MSTRG. 31390.1  | 363   | noncoding | -       |
| MSTRG. 31401.2  | 2869  | coding    | PF00001 |
| MSTRG. 31401.1  | 3116  | coding    | PF00001 |
| MSTRG. 31401.3  | 2901  | coding    | PF00001 |
| MSTRG. 31407.1  | 11417 | noncoding | -       |
| MSTRG. 31408.1  | 2210  | noncoding | -       |
| MSTRG. 31407.2  | 1650  | noncoding | -       |
| MSTRG. 31419.1  | 25674 | coding    | PF02994 |
| MSTRG. 31421.1  | 4160  | noncoding | -       |
| MSTRG. 31426.1  | 3176  | coding    | PF00617 |
| MSTRG. 31426.2  | 3357  | coding    | PF00617 |
| MSTRG. 31431.1  | 1338  | noncoding | -       |
| MSTRG. 31435.6  | 2526  | coding    | PF08080 |
| MSTRG. 31435.10 | 3634  | coding    | PF08080 |
| MSTRG. 31435.2  | 2466  | coding    | PF08080 |
| MSTRG. 31435.8  | 2261  | coding    | PF08080 |
| MSTRG. 31436.1  | 1726  | noncoding | -       |
| MSTRG. 31440.1  | 235   | noncoding | -       |
| MSTRG. 31459.1  | 1307  | noncoding | -       |
| MSTRG. 31474.1  | 7080  | coding    | PF12796 |
| MSTRG. 31474.2  | 11042 | coding    | PF12796 |
| MSTRG. 31476.1  | 401   | noncoding | -       |
| MSTRG. 31477.1  | 37340 | noncoding | -       |
| MSTRG. 31474.3  | 2725  | noncoding | -       |
| MSTRG. 31478.1  | 6027  | noncoding | -       |
| MSTRG. 31477.2  | 5456  | noncoding | -       |
| MSTRG. 31479.1  | 6711  | noncoding | -       |
| MSTRG. 31474.4  | 5362  | noncoding | -       |
| MSTRG. 31474.6  | 688   | noncoding | -       |
| MSTRG. 31474.7  | 9005  | noncoding | -       |
| MSTRG. 31480.1  | 799   | noncoding | -       |
| MSTRG. 31468.2  | 3828  | noncoding | -       |
| MSTRG. 31468.4  | 2331  | noncoding | -       |
| MSTRG. 31468.5  | 1398  | noncoding | -       |
| MSTRG. 31484.1  | 7529  | coding    | PF01388 |
| MSTRG. 31485.1  | 12014 | noncoding | -       |
| MSTRG. 31485.2  | 10950 | noncoding | -       |

|                 |       |           |         |
|-----------------|-------|-----------|---------|
| MSTRG. 31493.1  | 5450  | coding    | PF08174 |
| MSTRG. 31493.2  | 4665  | coding    | PF08174 |
| MSTRG. 31505.1  | 5498  | noncoding | —       |
| MSTRG. 31506.1  | 21630 | noncoding | —       |
| MSTRG. 31505.2  | 28971 | noncoding | —       |
| MSTRG. 31505.4  | 12678 | noncoding | —       |
| MSTRG. 31505.3  | 11352 | noncoding | —       |
| MSTRG. 31507.1  | 17334 | noncoding | —       |
| MSTRG. 31505.5  | 7750  | noncoding | —       |
| MSTRG. 31495.1  | 2104  | noncoding | —       |
| MSTRG. 31511.1  | 5144  | noncoding | —       |
| MSTRG. 31511.2  | 3877  | noncoding | —       |
| MSTRG. 31512.1  | 20274 | noncoding | —       |
| MSTRG. 31510.4  | 2624  | noncoding | —       |
| MSTRG. 31510.5  | 8312  | noncoding | —       |
| MSTRG. 31510.7  | 6805  | noncoding | —       |
| MSTRG. 31510.8  | 12477 | noncoding | —       |
| MSTRG. 31510.9  | 1432  | noncoding | —       |
| MSTRG. 31513.1  | 8926  | noncoding | —       |
| MSTRG. 31515.1  | 4175  | noncoding | —       |
| MSTRG. 31517.1  | 302   | noncoding | —       |
| MSTRG. 31522.1  | 299   | noncoding | —       |
| MSTRG. 31525.1  | 1192  | coding    | PF01044 |
| MSTRG. 31525.2  | 2238  | coding    | PF01044 |
| MSTRG. 31526.1  | 232   | noncoding | —       |
| MSTRG. 31527.1  | 695   | noncoding | —       |
| MSTRG. 31531.1  | 2577  | noncoding | —       |
| MSTRG. 31531.2  | 3701  | noncoding | —       |
| MSTRG. 31532.2  | 5068  | coding    | PF02146 |
| MSTRG. 31531.4  | 4124  | coding    | PF00632 |
| MSTRG. 31533.1  | 2073  | noncoding | —       |
| MSTRG. 31531.8  | 3433  | noncoding | —       |
| MSTRG. 31536.1  | 1075  | noncoding | —       |
| MSTRG. 31537.13 | 1396  | noncoding | —       |
| MSTRG. 31543.1  | 10308 | coding    | PF12851 |
| MSTRG. 31544.3  | 1102  | noncoding | —       |
| MSTRG. 31546.5  | 3606  | coding    | PF14444 |
| MSTRG. 31546.7  | 4047  | coding    | PF14443 |
| MSTRG. 31548.1  | 53509 | coding    | PF10264 |
| MSTRG. 31548.2  | 53475 | coding    | PF10264 |
| MSTRG. 31548.3  | 53284 | coding    | PF10264 |
| MSTRG. 31548.4  | 44015 | coding    | PF10264 |
| MSTRG. 31548.5  | 50303 | coding    | PF10264 |
| MSTRG. 31549.3  | 866   | noncoding | —       |
| MSTRG. 31551.3  | 3490  | coding    | PF12309 |
| MSTRG. 31551.2  | 2315  | coding    | PF12309 |
| MSTRG. 31552.1  | 1663  | noncoding | —       |
| MSTRG. 31551.4  | 5609  | coding    | PF12309 |
| MSTRG. 31559.1  | 3015  | coding    | PF03643 |
| MSTRG. 31559.3  | 2781  | coding    | PF03643 |
| MSTRG. 31559.4  | 2983  | coding    | PF03643 |
| MSTRG. 31559.5  | 2937  | coding    | PF03643 |
| MSTRG. 31559.6  | 2703  | coding    | PF03643 |
| MSTRG. 31563.1  | 2568  | coding    | PF03727 |

|                 |       |           |         |
|-----------------|-------|-----------|---------|
| MSTRG. 31564.2  | 4298  | coding    | PF03727 |
| MSTRG. 31565.1  | 256   | noncoding | —       |
| MSTRG. 31566.2  | 1911  | noncoding | —       |
| MSTRG. 31570.4  | 1521  | noncoding | —       |
| MSTRG. 31570.5  | 3798  | noncoding | —       |
| MSTRG. 31570.3  | 5368  | noncoding | —       |
| MSTRG. 31570.6  | 3796  | noncoding | —       |
| MSTRG. 31570.9  | 5883  | noncoding | —       |
| MSTRG. 31570.8  | 1779  | noncoding | —       |
| MSTRG. 31570.7  | 5106  | noncoding | —       |
| MSTRG. 31571.2  | 2057  | noncoding | —       |
| MSTRG. 31571.1  | 7747  | noncoding | —       |
| MSTRG. 31571.3  | 8259  | noncoding | —       |
| MSTRG. 31571.4  | 6586  | noncoding | —       |
| MSTRG. 31567.2  | 2170  | noncoding | —       |
| MSTRG. 31576.1  | 215   | noncoding | —       |
| MSTRG. 31581.4  | 4247  | noncoding | —       |
| MSTRG. 31586.5  | 520   | noncoding | —       |
| MSTRG. 31584.2  | 4338  | coding    | PF01733 |
| MSTRG. 31591.1  | 840   | noncoding | —       |
| MSTRG. 31598.1  | 3943  | coding    | PF10591 |
| MSTRG. 31598.2  | 3183  | coding    | PF10591 |
| MSTRG. 31598.3  | 3181  | coding    | PF10591 |
| MSTRG. 31598.5  | 3437  | coding    | PF10591 |
| MSTRG. 31598.4  | 3595  | coding    | PF10591 |
| MSTRG. 31599.3  | 1951  | coding    | PF10469 |
| MSTRG. 31599.4  | 2342  | coding    | PF10469 |
| MSTRG. 31597.1  | 1645  | coding    | PF07809 |
| MSTRG. 31597.2  | 1635  | coding    | PF07809 |
| MSTRG. 31603.2  | 3012  | coding    | PF09320 |
| MSTRG. 31603.3  | 2522  | coding    | PF00226 |
| MSTRG. 31603.4  | 1391  | coding    | PF09320 |
| MSTRG. 31603.8  | 1615  | coding    | PF00226 |
| MSTRG. 31603.11 | 2042  | coding    | PF09320 |
| MSTRG. 31602.2  | 4568  | noncoding | —       |
| MSTRG. 31606.1  | 3663  | coding    | PF04678 |
| MSTRG. 31606.2  | 7939  | coding    | PF04678 |
| MSTRG. 31606.3  | 1836  | noncoding | —       |
| MSTRG. 31606.4  | 3722  | noncoding | —       |
| MSTRG. 31607.1  | 2774  | noncoding | —       |
| MSTRG. 31606.6  | 26971 | coding    | PF00078 |
| MSTRG. 31606.7  | 7016  | coding    | PF04678 |
| MSTRG. 31606.8  | 14742 | noncoding | —       |
| MSTRG. 31608.1  | 6100  | noncoding | —       |
| MSTRG. 31606.10 | 4978  | coding    | PF04678 |
| MSTRG. 31606.11 | 5466  | coding    | PF04678 |
| MSTRG. 31617.1  | 2302  | coding    | PF07093 |
| MSTRG. 31618.1  | 2249  | coding    | PF12516 |
| MSTRG. 31618.4  | 2021  | coding    | PF12516 |
| MSTRG. 31618.5  | 2246  | coding    | PF12516 |
| MSTRG. 31619.1  | 7157  | coding    | PF00226 |
| MSTRG. 31620.1  | 1369  | noncoding | —       |
| MSTRG. 31622.2  | 3569  | noncoding | —       |
| MSTRG. 31623.4  | 5716  | coding    | PF00191 |

|               |       |           |         |
|---------------|-------|-----------|---------|
| MSTRG.31625.1 | 381   | noncoding | -       |
| MSTRG.31626.3 | 6867  | noncoding | -       |
| MSTRG.31626.4 | 7283  | noncoding | -       |
| MSTRG.31626.5 | 6892  | noncoding | -       |
| MSTRG.31627.1 | 505   | noncoding | -       |
| MSTRG.31613.2 | 6503  | coding    | PF04811 |
| MSTRG.31613.3 | 5153  | coding    | PF04811 |
| MSTRG.31614.1 | 9850  | coding    | PF00852 |
| MSTRG.31630.5 | 5363  | noncoding | -       |
| MSTRG.31630.6 | 4332  | noncoding | -       |
| MSTRG.31633.1 | 1278  | noncoding | -       |
| MSTRG.31633.2 | 1265  | noncoding | -       |
| MSTRG.31629.1 | 1773  | coding    | PF00089 |
| MSTRG.31636.5 | 2920  | coding    | PF00928 |
| MSTRG.31637.2 | 1421  | noncoding | -       |
| MSTRG.31637.3 | 1583  | noncoding | -       |
| MSTRG.31638.1 | 2185  | noncoding | -       |
| MSTRG.31640.1 | 3762  | noncoding | -       |
| MSTRG.31641.1 | 3551  | noncoding | -       |
| MSTRG.31642.1 | 3287  | noncoding | -       |
| MSTRG.31643.1 | 4945  | noncoding | -       |
| MSTRG.31637.6 | 1595  | noncoding | -       |
| MSTRG.31644.2 | 2448  | noncoding | -       |
| MSTRG.31644.5 | 7352  | coding    | PF01853 |
| MSTRG.31648.1 | 2052  | noncoding | -       |
| MSTRG.31648.2 | 2226  | coding    | PF00782 |
| MSTRG.31648.3 | 4818  | coding    | PF14360 |
| MSTRG.31648.5 | 5945  | coding    | PF14360 |
| MSTRG.31650.1 | 263   | noncoding | -       |
| MSTRG.31651.2 | 1616  | coding    | PF01459 |
| MSTRG.31661.1 | 6610  | noncoding | -       |
| MSTRG.31662.1 | 1653  | noncoding | -       |
| MSTRG.31672.2 | 716   | noncoding | -       |
| MSTRG.31672.3 | 2188  | noncoding | -       |
| MSTRG.31673.1 | 1277  | noncoding | -       |
| MSTRG.31678.2 | 29448 | noncoding | -       |
| MSTRG.31678.1 | 41745 | coding    | PF16610 |
| MSTRG.31679.2 | 7207  | coding    | PF04822 |
| MSTRG.31682.1 | 1206  | noncoding | -       |
| MSTRG.31690.1 | 1591  | noncoding | -       |
| MSTRG.31691.1 | 7759  | coding    | PF02891 |
| MSTRG.31691.2 | 7433  | coding    | PF02891 |
| MSTRG.31692.1 | 654   | noncoding | -       |
| MSTRG.31691.3 | 6788  | coding    | PF02891 |
| MSTRG.31700.1 | 2644  | coding    | PF02093 |
| MSTRG.31703.2 | 2538  | coding    | PF14934 |
| MSTRG.31694.1 | 536   | noncoding | -       |
| MSTRG.31721.4 | 2651  | noncoding | -       |
| MSTRG.31722.2 | 864   | noncoding | -       |
| MSTRG.31723.5 | 1329  | noncoding | -       |
| MSTRG.31723.6 | 1210  | noncoding | -       |
| MSTRG.31725.2 | 2501  | coding    | PF00335 |
| MSTRG.31725.3 | 2662  | coding    | PF00335 |
| MSTRG.31725.4 | 2205  | coding    | PF00335 |



|                 |      |           |         |
|-----------------|------|-----------|---------|
| MSTRG. 31729.1  | 490  | noncoding | -       |
| MSTRG. 31742.2  | 2488 | noncoding | -       |
| MSTRG. 31740.1  | 3866 | coding    | PF00028 |
| MSTRG. 31743.1  | 1566 | noncoding | -       |
| MSTRG. 31743.2  | 1450 | noncoding | -       |
| MSTRG. 31743.3  | 1179 | noncoding | -       |
| MSTRG. 31745.3  | 3542 | noncoding | -       |
| MSTRG. 31745.6  | 2446 | noncoding | -       |
| MSTRG. 31745.7  | 2294 | noncoding | -       |
| MSTRG. 31746.1  | 3944 | noncoding | -       |
| MSTRG. 31747.1  | 958  | noncoding | -       |
| MSTRG. 31745.10 | 3650 | noncoding | -       |
| MSTRG. 31748.1  | 671  | noncoding | -       |
| MSTRG. 31748.2  | 242  | noncoding | -       |
| MSTRG. 31748.3  | 535  | noncoding | -       |
| MSTRG. 31749.1  | 446  | noncoding | -       |
| MSTRG. 31750.1  | 231  | noncoding | -       |
| MSTRG. 31753.1  | 1056 | noncoding | -       |
| MSTRG. 31757.4  | 4738 | coding    | PF07814 |
| MSTRG. 31757.5  | 4493 | coding    | PF07814 |
| MSTRG. 31758.1  | 5088 | coding    | PF00412 |
| MSTRG. 31766.1  | 9708 | noncoding | -       |
| MSTRG. 31777.1  | 320  | noncoding | -       |
| MSTRG. 31763.1  | 1063 | noncoding | -       |
| MSTRG. 31786.3  | 1317 | noncoding | -       |
| MSTRG. 31786.2  | 3548 | coding    | PF05587 |
| MSTRG. 31787.1  | 267  | noncoding | -       |
| MSTRG. 31786.4  | 2542 | coding    | PF05587 |
| MSTRG. 31786.7  | 2516 | coding    | PF05587 |
| MSTRG. 31786.10 | 1026 | noncoding | -       |
| MSTRG. 31786.11 | 2458 | coding    | PF05587 |
| MSTRG. 31786.12 | 2405 | noncoding | -       |
| MSTRG. 31796.5  | 1592 | coding    | PF00069 |
| MSTRG. 31796.4  | 5954 | coding    | PF00069 |
| MSTRG. 31796.6  | 5680 | coding    | PF00069 |
| MSTRG. 31797.1  | 7478 | noncoding | -       |
| MSTRG. 31799.1  | 3203 | coding    | PF00620 |
| MSTRG. 31801.1  | 2323 | noncoding | -       |
| MSTRG. 31801.2  | 1477 | noncoding | -       |
| MSTRG. 31801.3  | 1230 | noncoding | -       |
| MSTRG. 31801.4  | 1333 | noncoding | -       |
| MSTRG. 31801.5  | 1404 | noncoding | -       |
| MSTRG. 31801.6  | 1059 | noncoding | -       |
| MSTRG. 31801.7  | 832  | noncoding | -       |
| MSTRG. 31801.8  | 2362 | noncoding | -       |
| MSTRG. 31789.1  | 1212 | noncoding | -       |
| MSTRG. 31789.2  | 1549 | noncoding | -       |
| MSTRG. 31790.1  | 1772 | noncoding | -       |
| MSTRG. 31792.2  | 2397 | noncoding | -       |
| MSTRG. 31792.3  | 1034 | noncoding | -       |
| MSTRG. 31793.1  | 569  | noncoding | -       |
| MSTRG. 31793.2  | 415  | noncoding | -       |
| MSTRG. 31792.4  | 1539 | noncoding | -       |
| MSTRG. 31803.1  | 6831 | coding    | PF00176 |

|                 |      |           |         |
|-----------------|------|-----------|---------|
| MSTRG. 31803.3  | 3313 | coding    | PF00176 |
| MSTRG. 31804.1  | 1186 | noncoding | —       |
| MSTRG. 31805.5  | 471  | noncoding | —       |
| MSTRG. 31805.3  | 902  | coding    | PF15092 |
| MSTRG. 31805.1  | 1557 | coding    | PF15092 |
| MSTRG. 31805.4  | 1019 | coding    | PF15092 |
| MSTRG. 31806.1  | 1182 | coding    | PF16870 |
| MSTRG. 31810.1  | 953  | noncoding | —       |
| MSTRG. 31812.5  | 4139 | coding    | PF05825 |
| MSTRG. 31812.9  | 2619 | coding    | PF12489 |
| MSTRG. 31812.8  | 2571 | coding    | PF12489 |
| MSTRG. 31813.1  | 702  | noncoding | —       |
| MSTRG. 31812.12 | 803  | coding    | PF05825 |
| MSTRG. 31812.10 | 785  | coding    | PF05825 |
| MSTRG. 31815.4  | 4227 | coding    | PF15255 |
| MSTRG. 31815.2  | 5231 | coding    | PF15255 |
| MSTRG. 31815.3  | 5228 | coding    | PF15255 |
| MSTRG. 31815.5  | 3516 | coding    | PF15255 |
| MSTRG. 31818.2  | 2212 | noncoding | —       |
| MSTRG. 31818.3  | 2637 | coding    | PF00240 |
| MSTRG. 31818.7  | 3243 | noncoding | —       |
| MSTRG. 31820.2  | 4880 | coding    | PF12906 |
| MSTRG. 31820.3  | 4176 | coding    | PF12906 |
| MSTRG. 31820.4  | 4443 | coding    | PF12906 |
| MSTRG. 31820.5  | 4422 | coding    | PF12906 |
| MSTRG. 31820.6  | 4466 | coding    | PF12906 |
| MSTRG. 31820.7  | 4199 | coding    | PF12906 |
| MSTRG. 31820.8  | 4478 | coding    | PF12906 |
| MSTRG. 31820.9  | 5911 | coding    | PF12906 |
| MSTRG. 31822.2  | 2709 | coding    | PF00305 |
| MSTRG. 31824.1  | 5058 | noncoding | —       |
| MSTRG. 31826.1  | 2974 | noncoding | —       |
| MSTRG. 31829.1  | 545  | noncoding | —       |
| MSTRG. 31833.4  | 1145 | noncoding | —       |
| MSTRG. 31838.1  | 1435 | noncoding | —       |
| MSTRG. 31839.2  | 2222 | noncoding | —       |
| MSTRG. 31865.1  | 1259 | coding    | PF08925 |
| MSTRG. 31867.3  | 7656 | noncoding | —       |
| MSTRG. 31867.5  | 7142 | noncoding | —       |
| MSTRG. 31867.7  | 7049 | noncoding | —       |
| MSTRG. 31867.6  | 7450 | noncoding | —       |
| MSTRG. 31868.1  | 2718 | noncoding | —       |
| MSTRG. 31867.8  | 1486 | noncoding | —       |
| MSTRG. 31859.4  | 1903 | coding    | PF17045 |
| MSTRG. 31859.3  | 1929 | coding    | PF17045 |
| MSTRG. 31861.2  | 4529 | coding    | PF01490 |
| MSTRG. 31875.1  | 1111 | noncoding | —       |
| MSTRG. 31883.1  | 334  | noncoding | —       |
| MSTRG. 31885.3  | 6688 | coding    | PF04968 |
| MSTRG. 31885.4  | 4256 | coding    | PF04968 |
| MSTRG. 31886.1  | 2839 | noncoding | —       |
| MSTRG. 31886.2  | 4458 | noncoding | —       |
| MSTRG. 31897.1  | 4101 | coding    | PF00264 |
| MSTRG. 31898.1  | 3949 | noncoding | —       |

|                  |       |           |         |
|------------------|-------|-----------|---------|
| MSTRG. 31897. 2  | 2914  | coding    | PF00264 |
| MSTRG. 31904. 1  | 857   | noncoding | —       |
| MSTRG. 31907. 1  | 1504  | noncoding | —       |
| MSTRG. 31905. 1  | 592   | noncoding | —       |
| MSTRG. 31909. 1  | 509   | noncoding | —       |
| MSTRG. 31910. 1  | 1537  | noncoding | —       |
| MSTRG. 31911. 2  | 1110  | coding    | PF03949 |
| MSTRG. 31914. 2  | 2075  | coding    | PF05603 |
| MSTRG. 31914. 3  | 4257  | coding    | PF05603 |
| MSTRG. 31917. 7  | 414   | noncoding | —       |
| MSTRG. 31919. 1  | 4578  | noncoding | —       |
| MSTRG. 31920. 6  | 1630  | noncoding | —       |
| MSTRG. 31920. 8  | 1524  | noncoding | —       |
| MSTRG. 31920. 9  | 1526  | noncoding | —       |
| MSTRG. 31923. 1  | 1306  | noncoding | —       |
| MSTRG. 31923. 2  | 980   | noncoding | —       |
| MSTRG. 31994. 3  | 850   | coding    | PF07114 |
| MSTRG. 31998. 2  | 997   | coding    | PF07114 |
| MSTRG. 31999. 1  | 2383  | coding    | PF10608 |
| MSTRG. 32003. 1  | 5934  | noncoding | —       |
| MSTRG. 32003. 2  | 5318  | noncoding | —       |
| MSTRG. 32016. 1  | 1108  | noncoding | —       |
| MSTRG. 32029. 1  | 2315  | noncoding | —       |
| MSTRG. 32030. 1  | 1866  | noncoding | —       |
| MSTRG. 32051. 1  | 980   | noncoding | —       |
| MSTRG. 32052. 1  | 5840  | coding    | PF00625 |
| MSTRG. 32052. 2  | 5892  | coding    | PF00625 |
| MSTRG. 31935. 1  | 11278 | coding    | PF12796 |
| MSTRG. 31935. 2  | 3125  | coding    | PF12796 |
| MSTRG. 31935. 6  | 5716  | coding    | PF12796 |
| MSTRG. 31935. 8  | 2962  | coding    | PF12796 |
| MSTRG. 31935. 9  | 5204  | coding    | PF12796 |
| MSTRG. 31935. 10 | 1732  | coding    | PF12796 |
| MSTRG. 31936. 3  | 1709  | noncoding | —       |
| MSTRG. 31939. 1  | 1143  | noncoding | —       |
| MSTRG. 31939. 2  | 1056  | noncoding | —       |
| MSTRG. 31939. 3  | 805   | noncoding | —       |
| MSTRG. 31939. 4  | 756   | noncoding | —       |
| MSTRG. 31940. 1  | 4532  | noncoding | —       |
| MSTRG. 31941. 1  | 1852  | noncoding | —       |
| MSTRG. 31941. 2  | 9404  | noncoding | —       |
| MSTRG. 31941. 3  | 13539 | noncoding | —       |
| MSTRG. 31941. 4  | 12765 | noncoding | —       |
| MSTRG. 31942. 4  | 5086  | noncoding | —       |
| MSTRG. 31928. 2  | 3573  | noncoding | —       |
| MSTRG. 31930. 1  | 286   | noncoding | —       |
| MSTRG. 31930. 2  | 4716  | coding    | PF00078 |
| MSTRG. 31948. 1  | 2219  | noncoding | —       |
| MSTRG. 31963. 1  | 341   | noncoding | —       |
| MSTRG. 31968. 1  | 3981  | noncoding | —       |
| MSTRG. 31981. 1  | 4861  | coding    | PF02994 |
| MSTRG. 31990. 1  | 5008  | noncoding | —       |
| MSTRG. 31992. 2  | 13441 | coding    | PF06484 |
| MSTRG. 32053. 1  | 2150  | noncoding | —       |

|                |       |           |         |
|----------------|-------|-----------|---------|
| MSTRG. 32054.1 | 775   | noncoding | -       |
| MSTRG. 32056.2 | 29923 | noncoding | -       |
| MSTRG. 32056.3 | 9465  | noncoding | -       |
| MSTRG. 32058.1 | 8750  | noncoding | -       |
| MSTRG. 32059.1 | 2393  | coding    | PF00443 |
| MSTRG. 32068.2 | 2468  | coding    | PF03155 |
| MSTRG. 32055.2 | 734   | coding    | PF06374 |
| MSTRG. 32069.2 | 2740  | noncoding | -       |
| MSTRG. 32070.3 | 574   | coding    | PF04430 |
| MSTRG. 32072.3 | 7498  | noncoding | -       |
| MSTRG. 32076.5 | 2791  | coding    | PF03009 |
| MSTRG. 32076.7 | 2075  | noncoding | -       |
| MSTRG. 32076.3 | 3083  | coding    | PF03009 |
| MSTRG. 32076.4 | 2614  | noncoding | -       |
| MSTRG. 32076.6 | 2926  | noncoding | -       |
| MSTRG. 32077.1 | 224   | noncoding | -       |
| MSTRG. 32078.1 | 2361  | noncoding | -       |
| MSTRG. 32084.1 | 820   | noncoding | -       |
| MSTRG. 32085.1 | 665   | noncoding | -       |
| MSTRG. 32086.1 | 2267  | noncoding | -       |
| MSTRG. 32091.1 | 2587  | noncoding | -       |
| MSTRG. 32091.2 | 1495  | noncoding | -       |
| MSTRG. 32104.3 | 1445  | noncoding | -       |
| MSTRG. 32105.1 | 1530  | noncoding | -       |
| MSTRG. 32106.1 | 680   | noncoding | -       |
| MSTRG. 32107.1 | 1395  | noncoding | -       |
| MSTRG. 32108.2 | 1284  | noncoding | -       |
| MSTRG. 32108.1 | 2596  | noncoding | -       |
| MSTRG. 32109.1 | 838   | noncoding | -       |
| MSTRG. 32110.1 | 4702  | noncoding | -       |
| MSTRG. 32104.4 | 6219  | noncoding | -       |
| MSTRG. 32111.1 | 6273  | noncoding | -       |
| MSTRG. 32112.1 | 6911  | noncoding | -       |
| MSTRG. 32094.1 | 262   | noncoding | -       |
| MSTRG. 32094.2 | 238   | noncoding | -       |
| MSTRG. 32113.1 | 580   | noncoding | -       |
| MSTRG. 32114.2 | 457   | noncoding | -       |
| MSTRG. 32115.1 | 826   | noncoding | -       |
| MSTRG. 32116.2 | 3504  | noncoding | -       |
| MSTRG. 32119.1 | 813   | noncoding | -       |
| MSTRG. 32123.1 | 241   | noncoding | -       |
| MSTRG. 32128.1 | 1514  | noncoding | -       |
| MSTRG. 32129.1 | 628   | coding    | PF00093 |
| MSTRG. 32130.2 | 1175  | noncoding | -       |
| MSTRG. 32130.1 | 2654  | noncoding | -       |
| MSTRG. 32130.3 | 3013  | coding    | PF00209 |
| MSTRG. 32133.1 | 4554  | noncoding | -       |
| MSTRG. 32134.1 | 7103  | noncoding | -       |
| MSTRG. 32134.2 | 6702  | noncoding | -       |
| MSTRG. 32134.4 | 11932 | noncoding | -       |
| MSTRG. 32137.1 | 10908 | noncoding | -       |
| MSTRG. 32137.2 | 9717  | noncoding | -       |
| MSTRG. 32137.3 | 9486  | noncoding | -       |
| MSTRG. 32136.1 | 687   | noncoding | -       |

|                |       |           |         |
|----------------|-------|-----------|---------|
| MSTRG. 32140.1 | 716   | noncoding | –       |
| MSTRG. 32141.1 | 3215  | coding    | PF02319 |
| MSTRG. 32142.1 | 853   | coding    | PF00412 |
| MSTRG. 32143.4 | 2087  | coding    | PF12796 |
| MSTRG. 32146.1 | 3008  | coding    | PF00102 |
| MSTRG. 32154.2 | 1714  | noncoding | –       |
| MSTRG. 32155.1 | 2691  | noncoding | –       |
| MSTRG. 32155.2 | 4135  | noncoding | –       |
| MSTRG. 32158.3 | 879   | coding    | PF00056 |
| MSTRG. 32163.1 | 666   | noncoding | –       |
| MSTRG. 32164.1 | 1972  | coding    | PF00056 |
| MSTRG. 32150.2 | 2140  | coding    | PF08567 |
| MSTRG. 32150.3 | 2007  | coding    | PF08567 |
| MSTRG. 32167.2 | 1632  | noncoding | –       |
| MSTRG. 32167.3 | 2232  | noncoding | –       |
| MSTRG. 32168.1 | 399   | noncoding | –       |
| MSTRG. 32169.2 | 1112  | noncoding | –       |
| MSTRG. 32166.1 | 2347  | coding    | PF13853 |
| MSTRG. 32172.2 | 1558  | coding    | PF05964 |
| MSTRG. 32176.4 | 1985  | coding    | PF03629 |
| MSTRG. 32176.3 | 1859  | coding    | PF03629 |
| MSTRG. 32177.1 | 719   | noncoding | –       |
| MSTRG. 32180.1 | 1706  | noncoding | –       |
| MSTRG. 32181.4 | 3009  | coding    | PF13895 |
| MSTRG. 32183.6 | 1912  | noncoding | –       |
| MSTRG. 32184.1 | 1254  | noncoding | –       |
| MSTRG. 32184.3 | 1589  | noncoding | –       |
| MSTRG. 32199.1 | 8596  | noncoding | –       |
| MSTRG. 32199.2 | 1318  | noncoding | –       |
| MSTRG. 32199.3 | 2646  | noncoding | –       |
| MSTRG. 32201.1 | 561   | noncoding | –       |
| MSTRG. 32203.2 | 1766  | coding    | PF00271 |
| MSTRG. 32203.4 | 1853  | coding    | PF00271 |
| MSTRG. 32206.2 | 2023  | noncoding | –       |
| MSTRG. 32206.4 | 2493  | noncoding | –       |
| MSTRG. 32206.5 | 2133  | noncoding | –       |
| MSTRG. 32208.2 | 1770  | coding    | PF01266 |
| MSTRG. 32204.2 | 3322  | noncoding | –       |
| MSTRG. 32212.1 | 2178  | noncoding | –       |
| MSTRG. 32225.1 | 329   | noncoding | –       |
| MSTRG. 32227.1 | 424   | noncoding | –       |
| MSTRG. 32229.2 | 2132  | coding    | PF00178 |
| MSTRG. 32232.1 | 10115 | coding    | PF00620 |
| MSTRG. 32232.2 | 8545  | coding    | PF00620 |
| MSTRG. 32231.1 | 213   | noncoding | –       |
| MSTRG. 32231.2 | 220   | noncoding | –       |
| MSTRG. 32237.2 | 717   | coding    | PF15212 |
| MSTRG. 32238.1 | 681   | noncoding | –       |
| MSTRG. 32239.1 | 673   | coding    | PF07679 |
| MSTRG. 32241.1 | 602   | noncoding | –       |
| MSTRG. 32242.1 | 1014  | noncoding | –       |
| MSTRG. 32246.2 | 7015  | coding    | PF16638 |
| MSTRG. 32246.3 | 4497  | coding    | PF16638 |
| MSTRG. 32249.1 | 4582  | coding    | PF00651 |

|                  |       |           |         |
|------------------|-------|-----------|---------|
| MSTRG. 32249. 5  | 5419  | coding    | PF00651 |
| MSTRG. 32250. 1  | 2562  | noncoding | —       |
| MSTRG. 32251. 1  | 1012  | noncoding | —       |
| MSTRG. 32251. 2  | 11842 | noncoding | —       |
| MSTRG. 32252. 1  | 724   | noncoding | —       |
| MSTRG. 32254. 1  | 6197  | coding    | PF00787 |
| MSTRG. 32257. 1  | 552   | noncoding | —       |
| MSTRG. 32260. 2  | 2248  | noncoding | —       |
| MSTRG. 32265. 1  | 838   | coding    | PF00026 |
| MSTRG. 32266. 1  | 704   | coding    | PF00026 |
| MSTRG. 32267. 1  | 745   | coding    | PF00026 |
| MSTRG. 32270. 2  | 1306  | coding    | PF00026 |
| MSTRG. 32275. 3  | 2397  | coding    | PF03188 |
| MSTRG. 32275. 1  | 2344  | coding    | PF03188 |
| MSTRG. 32275. 2  | 2568  | coding    | PF03188 |
| MSTRG. 32275. 6  | 2299  | coding    | PF03188 |
| MSTRG. 32275. 7  | 2454  | coding    | PF03188 |
| MSTRG. 32276. 4  | 2953  | coding    | PF14935 |
| MSTRG. 32278. 3  | 1694  | coding    | PF15691 |
| MSTRG. 32278. 4  | 1667  | coding    | PF15691 |
| MSTRG. 32277. 1  | 2677  | noncoding | —       |
| MSTRG. 32283. 1  | 937   | noncoding | —       |
| MSTRG. 32283. 2  | 1138  | noncoding | —       |
| MSTRG. 32285. 1  | 1457  | noncoding | —       |
| MSTRG. 32286. 1  | 1376  | noncoding | —       |
| MSTRG. 32289. 1  | 2087  | noncoding | —       |
| MSTRG. 32291. 2  | 603   | coding    | PF05251 |
| MSTRG. 32292. 1  | 2032  | coding    | PF00867 |
| MSTRG. 32292. 3  | 2138  | coding    | PF00867 |
| MSTRG. 32293. 1  | 3601  | coding    | PF00173 |
| MSTRG. 32300. 3  | 2810  | noncoding | —       |
| MSTRG. 32300. 5  | 2821  | noncoding | —       |
| MSTRG. 32301. 3  | 2426  | coding    | PF01062 |
| MSTRG. 32305. 2  | 2344  | coding    | PF01112 |
| MSTRG. 32324. 12 | 11089 | noncoding | —       |
| MSTRG. 32324. 17 | 11314 | noncoding | —       |
| MSTRG. 32324. 18 | 11755 | noncoding | —       |
| MSTRG. 32324. 20 | 10849 | noncoding | —       |
| MSTRG. 32324. 21 | 12043 | noncoding | —       |
| MSTRG. 32324. 3  | 7414  | noncoding | —       |
| MSTRG. 32324. 33 | 11053 | noncoding | —       |
| MSTRG. 32324. 35 | 9940  | noncoding | —       |
| MSTRG. 32324. 38 | 10849 | noncoding | —       |
| MSTRG. 32324. 40 | 9958  | noncoding | —       |
| MSTRG. 32324. 43 | 11839 | noncoding | —       |
| MSTRG. 32324. 47 | 13072 | noncoding | —       |
| MSTRG. 32324. 49 | 11881 | noncoding | —       |
| MSTRG. 32324. 50 | 12589 | noncoding | —       |
| MSTRG. 32324. 53 | 9313  | noncoding | —       |
| MSTRG. 32324. 55 | 11089 | noncoding | —       |
| MSTRG. 32324. 56 | 13213 | noncoding | —       |
| MSTRG. 32324. 7  | 10465 | noncoding | —       |
| MSTRG. 32324. 9  | 12847 | noncoding | —       |
| MSTRG. 32310. 3  | 3356  | coding    | PF01055 |

|                 |      |           |         |
|-----------------|------|-----------|---------|
| MSTRG. 32310.4  | 3422 | coding    | PF01055 |
| MSTRG. 32322.7  | 1547 | coding    | PF06775 |
| MSTRG. 32322.10 | 2033 | coding    | PF06775 |
| MSTRG. 32322.12 | 2042 | coding    | PF06775 |
| MSTRG. 32322.8  | 2372 | coding    | PF06775 |
| MSTRG. 32322.11 | 2477 | coding    | PF06775 |
| MSTRG. 32322.3  | 2474 | coding    | PF06775 |
| MSTRG. 32322.4  | 1900 | coding    | PF06775 |
| MSTRG. 32322.9  | 2082 | coding    | PF06775 |
| MSTRG. 32322.2  | 2317 | coding    | PF06775 |
| MSTRG. 32322.16 | 1968 | coding    | PF06775 |
| MSTRG. 32323.1  | 1604 | coding    | PF00631 |
| MSTRG. 32320.3  | 2022 | noncoding | —       |
| MSTRG. 32331.1  | 5244 | coding    | PF00651 |
| MSTRG. 32331.3  | 5017 | coding    | PF00651 |
| MSTRG. 32331.4  | 4976 | coding    | PF00651 |
| MSTRG. 32331.5  | 1897 | coding    | PF00651 |
| MSTRG. 32331.6  | 2018 | coding    | PF00651 |
| MSTRG. 32334.1  | 5183 | coding    | PF02969 |
| MSTRG. 32334.2  | 5180 | coding    | PF02969 |
| MSTRG. 32334.3  | 3443 | coding    | PF02969 |
| MSTRG. 32338.1  | 375  | noncoding | —       |
| MSTRG. 32339.2  | 1502 | noncoding | —       |
| MSTRG. 32339.1  | 4349 | noncoding | —       |
| MSTRG. 32339.3  | 2200 | noncoding | —       |
| MSTRG. 32338.4  | 1657 | noncoding | —       |
| MSTRG. 32338.6  | 1649 | noncoding | —       |
| MSTRG. 32338.7  | 1559 | noncoding | —       |
| MSTRG. 32329.1  | 5111 | coding    | PF04970 |
| MSTRG. 32329.2  | 5117 | coding    | PF04970 |
| MSTRG. 32329.3  | 4409 | coding    | PF04970 |
| MSTRG. 32329.5  | 1962 | coding    | PF04970 |
| MSTRG. 32329.6  | 2904 | coding    | PF04970 |
| MSTRG. 32329.7  | 1828 | coding    | PF04970 |
| MSTRG. 32340.2  | 6662 | coding    | PF02263 |
| MSTRG. 32340.4  | 2113 | coding    | PF02263 |
| MSTRG. 32342.1  | 3909 | coding    | PF02453 |
| MSTRG. 32343.2  | 517  | noncoding | —       |
| MSTRG. 32344.1  | 898  | noncoding | —       |
| MSTRG. 32350.3  | 2585 | coding    | PF00069 |
| MSTRG. 32354.2  | 1813 | coding    | PF10275 |
| MSTRG. 32354.3  | 1612 | coding    | PF10275 |
| MSTRG. 32356.1  | 3827 | noncoding | —       |
| MSTRG. 32358.2  | 2483 | noncoding | —       |
| MSTRG. 32358.3  | 2236 | noncoding | —       |
| MSTRG. 32358.4  | 2099 | noncoding | —       |
| MSTRG. 32364.3  | 1549 | coding    | PF00341 |
| MSTRG. 32365.1  | 2629 | coding    | PF00341 |
| MSTRG. 32365.2  | 3229 | coding    | PF00341 |
| MSTRG. 32366.5  | 542  | coding    | PF00254 |
| MSTRG. 32369.4  | 976  | coding    | PF10514 |
| MSTRG. 32369.3  | 1451 | coding    | PF10514 |
| MSTRG. 32371.2  | 3005 | noncoding | —       |
| MSTRG. 32371.3  | 1989 | noncoding | —       |

|                 |      |           |         |
|-----------------|------|-----------|---------|
| MSTRG. 32359.2  | 1030 | noncoding | –       |
| MSTRG. 32372.1  | 2302 | noncoding | –       |
| MSTRG. 32377.1  | 2374 | noncoding | –       |
| MSTRG. 32381.7  | 1831 | coding    | PF02210 |
| MSTRG. 32381.11 | 5051 | coding    | PF02210 |
| MSTRG. 32381.10 | 4338 | coding    | PF02210 |
| MSTRG. 32381.2  | 4921 | coding    | PF02210 |
| MSTRG. 32381.3  | 5176 | coding    | PF02210 |
| MSTRG. 32381.1  | 5164 | coding    | PF02210 |
| MSTRG. 32381.8  | 4963 | coding    | PF02210 |
| MSTRG. 32381.12 | 5106 | coding    | PF02210 |
| MSTRG. 32381.4  | 5548 | coding    | PF02210 |
| MSTRG. 32381.6  | 8537 | coding    | PF02210 |
| MSTRG. 32381.14 | 5763 | noncoding | –       |
| MSTRG. 32378.1  | 1216 | noncoding | –       |
| MSTRG. 32384.10 | 2822 | coding    | PF16275 |
| MSTRG. 32384.11 | 2967 | coding    | PF16275 |
| MSTRG. 32384.5  | 2972 | coding    | PF16275 |
| MSTRG. 32388.1  | 3387 | coding    | PF12763 |
| MSTRG. 32395.5  | 1341 | coding    | PF00025 |
| MSTRG. 32395.2  | 1689 | coding    | PF00025 |
| MSTRG. 32395.3  | 1357 | coding    | PF00025 |
| MSTRG. 32395.4  | 1457 | coding    | PF00025 |
| MSTRG. 32395.7  | 1216 | coding    | PF00025 |
| MSTRG. 32394.2  | 1603 | coding    | PF04212 |
| MSTRG. 32397.2  | 1701 | noncoding | –       |
| MSTRG. 32397.3  | 2124 | noncoding | –       |
| MSTRG. 32397.4  | 1516 | noncoding | –       |
| MSTRG. 32397.5  | 3080 | noncoding | –       |
| MSTRG. 32397.6  | 2785 | noncoding | –       |
| MSTRG. 32402.1  | 1648 | coding    | PF01222 |
| MSTRG. 32405.3  | 1881 | coding    | PF05046 |
| MSTRG. 32407.1  | 771  | noncoding | –       |
| MSTRG. 32411.2  | 6968 | coding    | PF01067 |
| MSTRG. 32412.2  | 2556 | coding    | PF14051 |
| MSTRG. 32411.3  | 7554 | noncoding | –       |
| MSTRG. 32411.4  | 8104 | noncoding | –       |
| MSTRG. 32411.5  | 7010 | noncoding | –       |
| MSTRG. 32415.1  | 2999 | coding    | PF06677 |
| MSTRG. 32416.3  | 3090 | coding    | PF00307 |
| MSTRG. 32418.6  | 6138 | coding    | PF05041 |
| MSTRG. 32418.9  | 6147 | coding    | PF05041 |
| MSTRG. 32419.2  | 3511 | coding    | PF02145 |
| MSTRG. 32424.1  | 3486 | noncoding | –       |
| MSTRG. 32427.1  | 1508 | noncoding | –       |
| MSTRG. 32434.2  | 2124 | noncoding | –       |
| MSTRG. 32441.1  | 801  | coding    | PF02961 |
| MSTRG. 32441.2  | 853  | coding    | PF02961 |
| MSTRG. 32441.3  | 750  | coding    | PF02961 |
| MSTRG. 32444.1  | 1267 | noncoding | –       |
| MSTRG. 32444.2  | 2415 | coding    | PF06990 |
| MSTRG. 32456.3  | 2022 | coding    | PF00071 |
| MSTRG. 32456.2  | 2631 | coding    | PF00071 |
| MSTRG. 32447.2  | 889  | coding    | PF03878 |



|                 |       |           |         |
|-----------------|-------|-----------|---------|
| MSTRG. 32451.2  | 2607  | coding    | PF01733 |
| MSTRG. 32457.1  | 986   | noncoding | —       |
| MSTRG. 32484.5  | 1851  | coding    | PF00076 |
| MSTRG. 32484.6  | 1938  | coding    | PF00076 |
| MSTRG. 32484.1  | 11148 | coding    | PF00076 |
| MSTRG. 32484.4  | 1939  | coding    | PF00076 |
| MSTRG. 32484.3  | 1405  | coding    | PF00076 |
| MSTRG. 32484.2  | 2273  | coding    | PF00076 |
| MSTRG. 32484.7  | 10873 | coding    | PF00076 |
| MSTRG. 32484.8  | 16179 | coding    | PF00076 |
| MSTRG. 32484.9  | 1948  | coding    | PF00076 |
| MSTRG. 32484.11 | 743   | coding    | PF00076 |
| MSTRG. 32489.1  | 1821  | coding    | PF15091 |
| MSTRG. 32489.2  | 1824  | coding    | PF15091 |
| MSTRG. 32492.2  | 3564  | coding    | PF02436 |
| MSTRG. 32492.5  | 3847  | coding    | PF02436 |
| MSTRG. 32494.1  | 1532  | noncoding | —       |
| MSTRG. 32468.1  | 7867  | coding    | PF16866 |
| MSTRG. 32468.4  | 6671  | coding    | PF16866 |
| MSTRG. 32468.5  | 6549  | coding    | PF16866 |
| MSTRG. 32468.6  | 6203  | noncoding | —       |
| MSTRG. 32469.1  | 6990  | noncoding | —       |
| MSTRG. 32474.2  | 1553  | coding    | PF04081 |
| MSTRG. 32474.3  | 877   | coding    | PF04081 |
| MSTRG. 32480.1  | 991   | coding    | PF05915 |
| MSTRG. 32497.2  | 1998  | coding    | PF09806 |
| MSTRG. 32501.2  | 1788  | noncoding | —       |
| MSTRG. 32501.3  | 1576  | noncoding | —       |
| MSTRG. 32507.4  | 2605  | coding    | PF01633 |
| MSTRG. 32507.3  | 2539  | coding    | PF01633 |
| MSTRG. 32507.6  | 1523  | coding    | PF01633 |
| MSTRG. 32509.1  | 3923  | noncoding | —       |
| MSTRG. 32509.3  | 3241  | noncoding | —       |
| MSTRG. 32513.1  | 716   | noncoding | —       |
| MSTRG. 32513.2  | 980   | noncoding | —       |
| MSTRG. 32514.4  | 4431  | coding    | PF04499 |
| MSTRG. 32514.5  | 8237  | coding    | PF04499 |
| MSTRG. 32515.1  | 5393  | noncoding | —       |
| MSTRG. 32519.1  | 4856  | coding    | PF03638 |
| MSTRG. 32519.3  | 1828  | coding    | PF03638 |
| MSTRG. 32519.4  | 1544  | coding    | PF03638 |
| MSTRG. 32519.5  | 7329  | noncoding | —       |
| MSTRG. 32519.6  | 3823  | noncoding | —       |
| MSTRG. 32519.7  | 2433  | noncoding | —       |
| MSTRG. 32519.8  | 2361  | noncoding | —       |
| MSTRG. 32519.9  | 1824  | noncoding | —       |
| MSTRG. 32520.1  | 1729  | coding    | PF05392 |
| MSTRG. 32520.2  | 1081  | coding    | PF05392 |
| MSTRG. 32520.3  | 1241  | coding    | PF05392 |
| MSTRG. 32520.4  | 474   | coding    | PF05392 |
| MSTRG. 32520.5  | 566   | coding    | PF05392 |
| MSTRG. 32523.3  | 703   | coding    | PF00829 |
| MSTRG. 32528.2  | 1075  | noncoding | —       |
| MSTRG. 32528.1  | 568   | noncoding | —       |

|                  |       |           |         |
|------------------|-------|-----------|---------|
| MSTRG. 32534. 11 | 4992  | coding    | PF16178 |
| MSTRG. 32534. 10 | 8553  | coding    | PF16178 |
| MSTRG. 32534. 3  | 10478 | coding    | PF16178 |
| MSTRG. 32534. 4  | 11119 | coding    | PF16178 |
| MSTRG. 32534. 6  | 9664  | coding    | PF16178 |
| MSTRG. 32534. 7  | 10910 | coding    | PF16178 |
| MSTRG. 32534. 13 | 2186  | coding    | PF16178 |
| MSTRG. 32534. 5  | 3026  | coding    | PF16178 |
| MSTRG. 32534. 12 | 3774  | coding    | PF16178 |
| MSTRG. 32534. 8  | 3574  | coding    | PF16178 |
| MSTRG. 32542. 1  | 708   | noncoding | —       |
| MSTRG. 32542. 3  | 1026  | noncoding | —       |
| MSTRG. 32545. 1  | 943   | noncoding | —       |
| MSTRG. 32546. 2  | 2637  | noncoding | —       |
| MSTRG. 32547. 4  | 2566  | coding    | PF02218 |
| MSTRG. 32547. 5  | 2695  | coding    | PF02218 |
| MSTRG. 32547. 6  | 2550  | coding    | PF02218 |
| MSTRG. 32549. 1  | 8615  | noncoding | —       |
| MSTRG. 32549. 2  | 5330  | noncoding | —       |
| MSTRG. 32549. 3  | 6192  | noncoding | —       |
| MSTRG. 32550. 1  | 1313  | coding    | PF07647 |
| MSTRG. 32552. 1  | 561   | noncoding | —       |
| MSTRG. 32554. 2  | 438   | noncoding | —       |
| MSTRG. 32554. 1  | 909   | noncoding | —       |
| MSTRG. 32554. 3  | 1212  | noncoding | —       |
| MSTRG. 32538. 2  | 669   | coding    | PF00022 |
| MSTRG. 32538. 4  | 624   | coding    | PF00022 |
| MSTRG. 32538. 5  | 1456  | coding    | PF00022 |
| MSTRG. 32541. 1  | 2916  | coding    | PF01222 |
| MSTRG. 32541. 4  | 2916  | coding    | PF01222 |
| MSTRG. 32557. 1  | 735   | noncoding | —       |
| MSTRG. 32558. 1  | 3536  | coding    | PF01237 |
| MSTRG. 32558. 2  | 3483  | coding    | PF01237 |
| MSTRG. 32561. 2  | 4095  | coding    | PF01406 |
| MSTRG. 32561. 3  | 2704  | coding    | PF01406 |
| MSTRG. 32561. 4  | 2962  | coding    | PF01406 |
| MSTRG. 32561. 5  | 3340  | coding    | PF01406 |
| MSTRG. 32564. 1  | 15108 | coding    | PF00078 |
| MSTRG. 32564. 2  | 11888 | coding    | PF00078 |
| MSTRG. 32562. 1  | 748   | noncoding | —       |
| MSTRG. 32566. 3  | 4908  | noncoding | —       |
| MSTRG. 32566. 4  | 5162  | noncoding | —       |
| MSTRG. 32566. 5  | 15949 | noncoding | —       |
| MSTRG. 32568. 3  | 2029  | coding    | PF15264 |
| MSTRG. 32575. 3  | 4336  | coding    | PF08365 |
| MSTRG. 32575. 4  | 2786  | coding    | PF08365 |
| MSTRG. 32575. 5  | 1185  | coding    | PF08365 |
| MSTRG. 32575. 6  | 3012  | coding    | PF08365 |
| MSTRG. 32575. 8  | 2745  | coding    | PF08365 |
| MSTRG. 32575. 10 | 2133  | coding    | PF08365 |
| MSTRG. 32575. 9  | 3637  | coding    | PF08365 |
| MSTRG. 32575. 11 | 1934  | coding    | PF08365 |
| MSTRG. 32575. 12 | 2123  | coding    | PF08365 |
| MSTRG. 32574. 3  | 1689  | noncoding | —       |

|                 |       |           |         |
|-----------------|-------|-----------|---------|
| MSTRG. 32576. 2 | 1735  | coding    | PF02029 |
| MSTRG. 32582. 1 | 1292  | coding    | PF03637 |
| MSTRG. 32588. 3 | 2518  | coding    | PF02296 |
| MSTRG. 32592. 1 | 1631  | coding    | PF00335 |
| MSTRG. 32592. 3 | 1720  | coding    | PF00335 |
| MSTRG. 32596. 2 | 2046  | noncoding | —       |
| MSTRG. 32598. 2 | 1193  | noncoding | —       |
| MSTRG. 32606. 2 | 3771  | coding    | PF08416 |
| MSTRG. 32606. 4 | 2526  | coding    | PF08416 |
| MSTRG. 32606. 3 | 2509  | coding    | PF08416 |
| MSTRG. 32607. 2 | 1821  | coding    | PF09799 |
| MSTRG. 32607. 3 | 1292  | coding    | PF09799 |
| MSTRG. 32604. 3 | 4603  | coding    | PF00628 |
| MSTRG. 32609. 2 | 3243  | noncoding | —       |
| MSTRG. 32611. 1 | 1840  | coding    | PF00071 |
| MSTRG. 32613. 1 | 2628  | noncoding | —       |
| MSTRG. 32614. 1 | 1478  | noncoding | —       |
| MSTRG. 32614. 2 | 2295  | noncoding | —       |
| MSTRG. 32614. 3 | 2415  | noncoding | —       |
| MSTRG. 32614. 4 | 2586  | noncoding | —       |
| MSTRG. 32614. 5 | 1391  | noncoding | —       |
| MSTRG. 32614. 6 | 1452  | noncoding | —       |
| MSTRG. 32617. 1 | 594   | coding    | PF04505 |
| MSTRG. 32619. 2 | 643   | coding    | PF04505 |
| MSTRG. 32621. 1 | 406   | noncoding | —       |
| MSTRG. 32628. 1 | 1617  | coding    | PF10482 |
| MSTRG. 32628. 2 | 447   | coding    | PF10482 |
| MSTRG. 32640. 1 | 6983  | noncoding | —       |
| MSTRG. 32641. 1 | 6747  | noncoding | —       |
| MSTRG. 32641. 2 | 7398  | noncoding | —       |
| MSTRG. 32641. 3 | 7211  | noncoding | —       |
| MSTRG. 32641. 4 | 12837 | noncoding | —       |
| MSTRG. 32634. 1 | 7520  | noncoding | —       |
| MSTRG. 32634. 2 | 5832  | noncoding | —       |
| MSTRG. 32646. 2 | 293   | noncoding | —       |
| MSTRG. 32646. 3 | 325   | coding    | PF00832 |
| MSTRG. 32658. 1 | 1495  | noncoding | —       |
| MSTRG. 32658. 2 | 1575  | coding    | PF00046 |
| MSTRG. 32658. 4 | 1303  | noncoding | —       |
| MSTRG. 32658. 3 | 1215  | coding    | PF00046 |
| MSTRG. 32660. 1 | 1386  | noncoding | —       |
| MSTRG. 32661. 2 | 11167 | coding    | PF15783 |
| MSTRG. 32662. 1 | 842   | noncoding | —       |
| MSTRG. 32663. 1 | 1365  | coding    | PF00046 |
| MSTRG. 32664. 1 | 1687  | noncoding | —       |
| MSTRG. 32665. 1 | 1407  | noncoding | —       |
| MSTRG. 32666. 2 | 1023  | noncoding | —       |
| MSTRG. 32656. 1 | 8341  | coding    | PF01299 |
| MSTRG. 32656. 3 | 2543  | coding    | PF01299 |
| MSTRG. 32668. 5 | 5225  | coding    | PF00888 |
| MSTRG. 32668. 6 | 3905  | coding    | PF00888 |
| MSTRG. 32674. 2 | 2852  | noncoding | —       |
| MSTRG. 32672. 1 | 1449  | noncoding | —       |
| MSTRG. 32681. 3 | 7421  | coding    | PF11262 |

|                 |       |           |         |
|-----------------|-------|-----------|---------|
| MSTRG. 32683.1  | 5760  | noncoding | -       |
| MSTRG. 32682.3  | 9485  | coding    | PF00653 |
| MSTRG. 32682.4  | 13246 | coding    | PF00653 |
| MSTRG. 32686.1  | 5802  | coding    | PF08514 |
| MSTRG. 32686.3  | 5624  | coding    | PF08514 |
| MSTRG. 32687.1  | 7373  | noncoding | -       |
| MSTRG. 32688.1  | 1000  | noncoding | -       |
| MSTRG. 32689.1  | 2697  | noncoding | -       |
| MSTRG. 32690.1  | 3595  | coding    | PF15186 |
| MSTRG. 32691.1  | 1036  | noncoding | -       |
| MSTRG. 32692.1  | 518   | noncoding | -       |
| MSTRG. 32697.1  | 270   | noncoding | -       |
| MSTRG. 32698.1  | 832   | noncoding | -       |
| MSTRG. 32699.1  | 1853  | noncoding | -       |
| MSTRG. 32699.2  | 1824  | noncoding | -       |
| MSTRG. 32699.3  | 1825  | noncoding | -       |
| MSTRG. 32699.4  | 1500  | noncoding | -       |
| MSTRG. 32699.5  | 1515  | noncoding | -       |
| MSTRG. 32709.11 | 364   | noncoding | -       |
| MSTRG. 32712.1  | 12883 | coding    | PF00176 |
| MSTRG. 32719.2  | 6230  | coding    | PF00178 |
| MSTRG. 32720.1  | 13803 | noncoding | -       |
| MSTRG. 32718.2  | 1389  | noncoding | -       |
| MSTRG. 32723.2  | 3800  | coding    | PF13836 |
| MSTRG. 32723.3  | 3957  | coding    | PF13836 |
| MSTRG. 32723.10 | 3619  | coding    | PF13836 |
| MSTRG. 32723.8  | 3843  | coding    | PF13836 |
| MSTRG. 32723.7  | 4006  | coding    | PF13836 |
| MSTRG. 32723.11 | 3840  | coding    | PF13836 |
| MSTRG. 32723.9  | 3695  | coding    | PF13836 |
| MSTRG. 32723.12 | 3838  | coding    | PF13836 |
| MSTRG. 32723.14 | 3837  | coding    | PF13836 |
| MSTRG. 32723.16 | 3838  | coding    | PF13836 |
| MSTRG. 32723.13 | 2354  | noncoding | -       |
| MSTRG. 32723.15 | 3822  | coding    | PF13836 |
| MSTRG. 32723.17 | 2802  | coding    | PF13836 |
| MSTRG. 32723.18 | 3856  | coding    | PF13836 |
| MSTRG. 32721.5  | 1371  | coding    | PF00153 |
| MSTRG. 32721.6  | 1618  | coding    | PF00153 |
| MSTRG. 32730.1  | 2079  | noncoding | -       |
| MSTRG. 32731.1  | 236   | noncoding | -       |
| MSTRG. 32732.1  | 1787  | coding    | PF02994 |
| MSTRG. 32730.3  | 1963  | noncoding | -       |
| MSTRG. 32738.1  | 2798  | coding    | PF00620 |
| MSTRG. 32738.2  | 2746  | coding    | PF00620 |
| MSTRG. 32738.4  | 4493  | coding    | PF00620 |
| MSTRG. 32738.5  | 2774  | coding    | PF00620 |
| MSTRG. 32738.6  | 2765  | coding    | PF00620 |
| MSTRG. 32738.7  | 6276  | coding    | PF00620 |
| MSTRG. 32739.1  | 4380  | noncoding | -       |
| MSTRG. 32740.1  | 805   | noncoding | -       |
| MSTRG. 32747.4  | 9127  | noncoding | -       |
| MSTRG. 32747.9  | 1088  | noncoding | -       |
| MSTRG. 32749.1  | 2113  | noncoding | -       |

|                 |       |           |         |
|-----------------|-------|-----------|---------|
| MSTRG. 32751.3  | 3629  | coding    | PF16674 |
| MSTRG. 32751.2  | 3670  | coding    | PF16674 |
| MSTRG. 32752.1  | 294   | noncoding | —       |
| MSTRG. 32749.2  | 892   | noncoding | —       |
| MSTRG. 32752.2  | 916   | noncoding | —       |
| MSTRG. 32752.4  | 843   | noncoding | —       |
| MSTRG. 32752.5  | 548   | noncoding | —       |
| MSTRG. 32752.6  | 548   | noncoding | —       |
| MSTRG. 32752.7  | 524   | noncoding | —       |
| MSTRG. 32752.8  | 524   | noncoding | —       |
| MSTRG. 32752.9  | 675   | noncoding | —       |
| MSTRG. 32754.1  | 1623  | noncoding | —       |
| MSTRG. 32754.2  | 841   | noncoding | —       |
| MSTRG. 32754.3  | 468   | noncoding | —       |
| MSTRG. 32755.1  | 604   | noncoding | —       |
| MSTRG. 32754.4  | 428   | noncoding | —       |
| MSTRG. 32756.1  | 404   | noncoding | —       |
| MSTRG. 32757.1  | 1863  | noncoding | —       |
| MSTRG. 32760.1  | 490   | noncoding | —       |
| MSTRG. 32765.1  | 3894  | noncoding | —       |
| MSTRG. 32773.1  | 16420 | noncoding | —       |
| MSTRG. 32767.1  | 1526  | coding    | PF00156 |
| MSTRG. 32781.1  | 1513  | coding    | PF16297 |
| MSTRG. 32782.1  | 1415  | coding    | PF16297 |
| MSTRG. 32796.3  | 669   | noncoding | —       |
| MSTRG. 32796.5  | 669   | noncoding | —       |
| MSTRG. 32796.4  | 1025  | noncoding | —       |
| MSTRG. 32796.6  | 2637  | noncoding | —       |
| MSTRG. 32796.7  | 2793  | coding    | PF02023 |
| MSTRG. 32796.9  | 2283  | coding    | PF02023 |
| MSTRG. 32796.10 | 2668  | coding    | PF02023 |
| MSTRG. 32796.8  | 2668  | coding    | PF02023 |
| MSTRG. 32796.11 | 2601  | coding    | PF02023 |
| MSTRG. 32796.12 | 3188  | coding    | PF02023 |
| MSTRG. 32796.14 | 238   | noncoding | —       |
| MSTRG. 32796.13 | 2138  | coding    | PF02023 |
| MSTRG. 32796.15 | 2460  | coding    | PF02023 |
| MSTRG. 32796.16 | 1998  | coding    | PF02023 |
| MSTRG. 32796.17 | 2508  | coding    | PF02023 |
| MSTRG. 32796.18 | 2168  | coding    | PF02023 |
| MSTRG. 32796.19 | 2116  | coding    | PF02023 |
| MSTRG. 32796.20 | 1950  | coding    | PF02023 |
| MSTRG. 32798.3  | 1912  | coding    | PF02023 |
| MSTRG. 32798.4  | 1674  | coding    | PF02023 |
| MSTRG. 32798.5  | 1652  | coding    | PF02023 |
| MSTRG. 32798.2  | 1715  | coding    | PF02023 |
| MSTRG. 32798.6  | 1656  | coding    | PF02023 |
| MSTRG. 32798.8  | 2881  | coding    | PF02023 |
| MSTRG. 32789.1  | 3853  | coding    | PF15300 |
| MSTRG. 32792.1  | 535   | noncoding | —       |
| MSTRG. 32801.1  | 5015  | noncoding | —       |
| MSTRG. 32801.3  | 4849  | noncoding | —       |
| MSTRG. 32801.4  | 2661  | noncoding | —       |
| MSTRG. 32802.1  | 416   | noncoding | —       |

|                |       |           |         |
|----------------|-------|-----------|---------|
| MSTRG. 32814.2 | 5178  | coding    | PF00621 |
| MSTRG. 32815.1 | 280   | noncoding | —       |
| MSTRG. 32821.1 | 6535  | coding    | PF16212 |
| MSTRG. 32821.2 | 6154  | coding    | PF16212 |
| MSTRG. 32821.3 | 5759  | coding    | PF16212 |
| MSTRG. 32821.4 | 3633  | coding    | PF16212 |
| MSTRG. 32821.5 | 3600  | coding    | PF16212 |
| MSTRG. 32819.1 | 301   | noncoding | —       |
| MSTRG. 32820.2 | 1588  | noncoding | —       |
| MSTRG. 32827.1 | 548   | noncoding | —       |
| MSTRG. 32828.1 | 511   | noncoding | —       |
| MSTRG. 32832.1 | 217   | noncoding | —       |
| MSTRG. 32832.2 | 382   | noncoding | —       |
| MSTRG. 32836.1 | 6366  | coding    | PF13855 |
| MSTRG. 32837.1 | 329   | noncoding | —       |
| MSTRG. 32841.1 | 1449  | noncoding | —       |
| MSTRG. 32842.7 | 611   | noncoding | —       |
| MSTRG. 32842.8 | 611   | noncoding | —       |
| MSTRG. 32842.6 | 618   | noncoding | —       |
| MSTRG. 32842.2 | 621   | noncoding | —       |
| MSTRG. 32839.1 | 735   | noncoding | —       |
| MSTRG. 32839.2 | 552   | noncoding | —       |
| MSTRG. 32839.3 | 530   | noncoding | —       |
| MSTRG. 32840.1 | 290   | noncoding | —       |
| MSTRG. 32849.1 | 1681  | noncoding | —       |
| MSTRG. 32859.1 | 778   | noncoding | —       |
| MSTRG. 32860.1 | 25547 | noncoding | —       |
| MSTRG. 32862.1 | 3631  | noncoding | —       |
| MSTRG. 32859.2 | 4443  | noncoding | —       |
| MSTRG. 32855.1 | 374   | noncoding | —       |
| MSTRG. 32866.1 | 2736  | noncoding | —       |
| MSTRG. 32867.1 | 2392  | noncoding | —       |
| MSTRG. 32867.2 | 4336  | noncoding | —       |
| MSTRG. 32867.3 | 2616  | noncoding | —       |
| MSTRG. 32867.4 | 7193  | coding    | PF01359 |
| MSTRG. 32867.5 | 24017 | noncoding | —       |
| MSTRG. 32867.6 | 2423  | noncoding | —       |
| MSTRG. 32867.7 | 6538  | noncoding | —       |
| MSTRG. 32863.5 | 2005  | coding    | PF12235 |
| MSTRG. 32863.6 | 3695  | coding    | PF12235 |
| MSTRG. 32864.2 | 1040  | noncoding | —       |
| MSTRG. 32874.3 | 8577  | coding    | PF05110 |
| MSTRG. 32874.5 | 12940 | coding    | PF05110 |
| MSTRG. 32874.6 | 2800  | coding    | PF05110 |
| MSTRG. 32876.1 | 4440  | noncoding | —       |
| MSTRG. 32877.1 | 14115 | noncoding | —       |
| MSTRG. 32869.1 | 501   | noncoding | —       |
| MSTRG. 32880.1 | 532   | noncoding | —       |
| MSTRG. 32884.1 | 1149  | noncoding | —       |
| MSTRG. 32888.1 | 643   | noncoding | —       |
| MSTRG. 32889.4 | 17154 | noncoding | —       |
| MSTRG. 32889.3 | 5202  | noncoding | —       |
| MSTRG. 32889.6 | 10893 | noncoding | —       |
| MSTRG. 32889.5 | 5248  | noncoding | —       |

|                |       |           |         |
|----------------|-------|-----------|---------|
| MSTRG. 32889.7 | 5800  | noncoding | -       |
| MSTRG. 32889.8 | 5383  | noncoding | -       |
| MSTRG. 32889.9 | 8195  | noncoding | -       |
| MSTRG. 32892.1 | 3738  | coding    | PF06602 |
| MSTRG. 32892.5 | 11240 | noncoding | -       |
| MSTRG. 32893.4 | 6641  | coding    | PF06602 |
| MSTRG. 32895.3 | 1957  | noncoding | -       |
| MSTRG. 32897.1 | 1024  | noncoding | -       |
| MSTRG. 32899.1 | 261   | noncoding | -       |
| MSTRG. 32906.3 | 2342  | noncoding | -       |
| MSTRG. 32906.4 | 1737  | noncoding | -       |
| MSTRG. 32906.6 | 2546  | noncoding | -       |
| MSTRG. 32906.5 | 1759  | noncoding | -       |
| MSTRG. 32907.1 | 326   | noncoding | -       |
| MSTRG. 32916.1 | 985   | coding    | PF13774 |
| MSTRG. 32921.1 | 737   | coding    | PF06071 |
| MSTRG. 32922.2 | 2001  | coding    | PF07651 |
| MSTRG. 32922.4 | 1931  | coding    | PF07651 |
| MSTRG. 32925.1 | 667   | coding    | PF08991 |
| MSTRG. 32925.2 | 2391  | coding    | PF01840 |
| MSTRG. 32927.1 | 6400  | noncoding | -       |
| MSTRG. 32929.1 | 2083  | coding    | PF00625 |
| MSTRG. 32930.2 | 2455  | coding    | PF08068 |
| MSTRG. 32933.1 | 1150  | noncoding | -       |
| MSTRG. 32936.6 | 7889  | noncoding | -       |
| MSTRG. 32936.7 | 3654  | noncoding | -       |
| MSTRG. 32936.8 | 3715  | noncoding | -       |
| MSTRG. 32936.9 | 3750  | noncoding | -       |
| MSTRG. 32934.2 | 3558  | coding    | PF14893 |
| MSTRG. 32934.3 | 3396  | coding    | PF14893 |
| MSTRG. 32934.4 | 3606  | coding    | PF14893 |
| MSTRG. 32934.5 | 3550  | coding    | PF14893 |
| MSTRG. 32935.1 | 6297  | noncoding | -       |
| MSTRG. 32937.2 | 1329  | noncoding | -       |
| MSTRG. 32939.2 | 3393  | coding    | PF00209 |
| MSTRG. 32943.1 | 653   | noncoding | -       |
| MSTRG. 32945.2 | 919   | coding    | PF00180 |
| MSTRG. 32946.1 | 862   | coding    | PF05404 |
| MSTRG. 32951.4 | 8988  | noncoding | -       |
| MSTRG. 32953.1 | 2781  | coding    | PF02779 |
| MSTRG. 32957.5 | 8352  | coding    | PF00630 |
| MSTRG. 32957.3 | 8414  | coding    | PF00630 |
| MSTRG. 32954.2 | 1118  | noncoding | -       |
| MSTRG. 32961.2 | 2263  | coding    | PF00996 |
| MSTRG. 32964.1 | 2562  | coding    | PF01437 |
| MSTRG. 32968.2 | 2189  | coding    | PF01758 |
| MSTRG. 32984.2 | 3010  | noncoding | -       |
| MSTRG. 32984.4 | 873   | noncoding | -       |
| MSTRG. 32984.3 | 822   | noncoding | -       |
| MSTRG. 32984.5 | 3020  | noncoding | -       |
| MSTRG. 32981.1 | 1274  | noncoding | -       |
| MSTRG. 32988.1 | 413   | noncoding | -       |
| MSTRG. 32992.1 | 203   | noncoding | -       |
| MSTRG. 33013.3 | 5847  | coding    | PF08374 |

|                |       |           |         |
|----------------|-------|-----------|---------|
| MSTRG. 33013.4 | 4192  | coding    | PF08374 |
| MSTRG. 33014.1 | 8443  | noncoding | —       |
| MSTRG. 33018.1 | 8152  | noncoding | —       |
| MSTRG. 33003.1 | 203   | noncoding | —       |
| MSTRG. 33021.1 | 9375  | coding    | PF02181 |
| MSTRG. 33021.2 | 3488  | coding    | PF02181 |
| MSTRG. 33021.3 | 8950  | coding    | PF02181 |
| MSTRG. 33023.1 | 5390  | noncoding | —       |
| MSTRG. 33024.1 | 780   | noncoding | —       |
| MSTRG. 33025.1 | 2600  | noncoding | —       |
| MSTRG. 33031.5 | 1628  | coding    | PF00335 |
| MSTRG. 33031.6 | 1289  | coding    | PF00335 |
| MSTRG. 33033.2 | 2761  | coding    | PF09162 |
| MSTRG. 33036.1 | 4070  | noncoding | —       |
| MSTRG. 33036.3 | 8516  | noncoding | —       |
| MSTRG. 33050.3 | 1108  | noncoding | —       |
| MSTRG. 33050.2 | 2049  | noncoding | —       |
| MSTRG. 33050.5 | 784   | noncoding | —       |
| MSTRG. 33054.1 | 2466  | noncoding | —       |
| MSTRG. 33056.1 | 1952  | coding    | PF16499 |
| MSTRG. 33063.2 | 1912  | coding    | PF00025 |
| MSTRG. 33063.3 | 2021  | coding    | PF00025 |
| MSTRG. 33068.1 | 1830  | noncoding | —       |
| MSTRG. 33069.1 | 1760  | noncoding | —       |
| MSTRG. 33083.6 | 1954  | coding    | PF05712 |
| MSTRG. 33088.1 | 9613  | noncoding | —       |
| MSTRG. 33090.2 | 11838 | coding    | PF15814 |
| MSTRG. 33090.3 | 3687  | noncoding | —       |
| MSTRG. 33097.2 | 1967  | coding    | PF15186 |
| MSTRG. 33101.1 | 8176  | coding    | PF00069 |
| MSTRG. 33102.5 | 3685  | noncoding | —       |
| MSTRG. 33102.4 | 4919  | noncoding | —       |
| MSTRG. 33102.6 | 4842  | noncoding | —       |
| MSTRG. 33114.1 | 4065  | noncoding | —       |
| MSTRG. 33114.2 | 4065  | noncoding | —       |
| MSTRG. 33114.3 | 959   | noncoding | —       |
| MSTRG. 33114.4 | 3783  | noncoding | —       |
| MSTRG. 33114.5 | 3794  | noncoding | —       |
| MSTRG. 33114.6 | 3766  | noncoding | —       |
| MSTRG. 33114.7 | 3606  | noncoding | —       |
| MSTRG. 33114.8 | 3365  | noncoding | —       |
| MSTRG. 33114.9 | 3333  | noncoding | —       |
| MSTRG. 33109.1 | 630   | noncoding | —       |
| MSTRG. 33108.3 | 3198  | noncoding | —       |
| MSTRG. 33120.2 | 1717  | noncoding | —       |
| MSTRG. 33124.3 | 1751  | noncoding | —       |
| MSTRG. 33124.1 | 2103  | coding    | PF05064 |
| MSTRG. 33127.4 | 1696  | coding    | PF01166 |
| MSTRG. 33127.5 | 2102  | coding    | PF01166 |
| MSTRG. 33128.1 | 6715  | noncoding | —       |
| MSTRG. 33131.1 | 2137  | noncoding | —       |
| MSTRG. 33132.1 | 2405  | noncoding | —       |
| MSTRG. 33131.2 | 2446  | noncoding | —       |
| MSTRG. 33131.4 | 1578  | coding    | PF15186 |



|                 |       |           |         |
|-----------------|-------|-----------|---------|
| MSTRG. 33133. 1 | 8503  | coding    | PF15186 |
| MSTRG. 33129. 2 | 2045  | noncoding | –       |
| MSTRG. 33135. 1 | 2720  | coding    | PF03416 |
| MSTRG. 33138. 2 | 679   | noncoding | –       |
| MSTRG. 33141. 2 | 2609  | noncoding | –       |
| MSTRG. 33144. 1 | 3371  | noncoding | –       |
| MSTRG. 33144. 2 | 3270  | noncoding | –       |
| MSTRG. 33150. 2 | 26017 | coding    | PF14808 |
| MSTRG. 33151. 1 | 15596 | noncoding | –       |
| MSTRG. 33148. 1 | 1919  | coding    | PF00093 |
| MSTRG. 33155. 2 | 1662  | noncoding | –       |
| MSTRG. 33158. 1 | 15961 | coding    | PF00069 |
| MSTRG. 33161. 1 | 5103  | coding    | PF04101 |
| MSTRG. 33161. 2 | 3914  | noncoding | –       |
| MSTRG. 33161. 3 | 3274  | noncoding | –       |
| MSTRG. 33164. 1 | 1510  | noncoding | –       |
| MSTRG. 33165. 1 | 1510  | noncoding | –       |
| MSTRG. 33166. 1 | 1705  | noncoding | –       |
| MSTRG. 33166. 2 | 1793  | noncoding | –       |
| MSTRG. 33168. 1 | 256   | noncoding | –       |
| MSTRG. 33172. 1 | 202   | noncoding | –       |
| MSTRG. 33179. 1 | 2434  | noncoding | –       |
| MSTRG. 33189. 1 | 994   | noncoding | –       |
| MSTRG. 33224. 2 | 3813  | coding    | PF07984 |
| MSTRG. 33224. 3 | 3298  | coding    | PF07984 |
| MSTRG. 33223. 1 | 239   | noncoding | –       |
| MSTRG. 33234. 1 | 364   | noncoding | –       |
| MSTRG. 33248. 1 | 824   | noncoding | –       |
| MSTRG. 33249. 1 | 1255  | noncoding | –       |
| MSTRG. 33245. 1 | 2609  | coding    | PF00517 |
| MSTRG. 33278. 2 | 1489  | coding    | PF04487 |
| MSTRG. 33280. 1 | 3182  | noncoding | –       |
| MSTRG. 33282. 4 | 5401  | coding    | PF01359 |
| MSTRG. 33284. 1 | 5545  | coding    | PF12157 |
| MSTRG. 33287. 3 | 2710  | coding    | PF08075 |
| MSTRG. 33301. 2 | 2881  | coding    | PF00812 |
| MSTRG. 33306. 3 | 3817  | noncoding | –       |
| MSTRG. 33309. 1 | 11481 | noncoding | –       |
| MSTRG. 33309. 3 | 3492  | coding    | PF02166 |
| MSTRG. 33319. 1 | 251   | noncoding | –       |
| MSTRG. 33322. 3 | 15183 | coding    | PF13832 |
| MSTRG. 33322. 4 | 15279 | coding    | PF13832 |
| MSTRG. 33322. 5 | 12399 | noncoding | –       |
| MSTRG. 33323. 1 | 16673 | noncoding | –       |
| MSTRG. 33325. 2 | 3443  | coding    | PF01585 |
| MSTRG. 33325. 4 | 3205  | coding    | PF01585 |
| MSTRG. 33325. 5 | 3010  | coding    | PF01585 |
| MSTRG. 33333. 1 | 4153  | coding    | PF00069 |
| MSTRG. 33333. 2 | 3563  | coding    | PF00069 |
| MSTRG. 33333. 5 | 5324  | coding    | PF00069 |
| MSTRG. 33333. 4 | 7127  | coding    | PF00069 |
| MSTRG. 33328. 1 | 4716  | coding    | PF01352 |
| MSTRG. 33329. 1 | 2561  | noncoding | –       |
| MSTRG. 33329. 2 | 2729  | coding    | PF00965 |

|                  |       |           |         |
|------------------|-------|-----------|---------|
| MSTRG. 33329. 4  | 2350  | noncoding | -       |
| MSTRG. 33329. 5  | 928   | coding    | PF00965 |
| MSTRG. 33338. 1  | 2349  | noncoding | -       |
| MSTRG. 33338. 3  | 2387  | coding    | PF01352 |
| MSTRG. 33339. 1  | 426   | noncoding | -       |
| MSTRG. 33348. 1  | 357   | noncoding | -       |
| MSTRG. 33367. 7  | 3271  | coding    | PF00850 |
| MSTRG. 33373. 2  | 3769  | noncoding | -       |
| MSTRG. 33373. 3  | 3940  | noncoding | -       |
| MSTRG. 33373. 5  | 3569  | noncoding | -       |
| MSTRG. 33373. 4  | 4039  | noncoding | -       |
| MSTRG. 33373. 8  | 2053  | noncoding | -       |
| MSTRG. 33374. 1  | 3449  | noncoding | -       |
| MSTRG. 33369. 2  | 2929  | noncoding | -       |
| MSTRG. 33369. 3  | 2946  | noncoding | -       |
| MSTRG. 33376. 1  | 560   | noncoding | -       |
| MSTRG. 33386. 1  | 706   | noncoding | -       |
| MSTRG. 33388. 1  | 969   | noncoding | -       |
| MSTRG. 33389. 2  | 2860  | coding    | PF05716 |
| MSTRG. 33391. 1  | 7427  | coding    | PF00609 |
| MSTRG. 33398. 2  | 2163  | noncoding | -       |
| MSTRG. 33398. 1  | 2243  | noncoding | -       |
| MSTRG. 33400. 2  | 3426  | noncoding | -       |
| MSTRG. 33400. 1  | 3266  | noncoding | -       |
| MSTRG. 33400. 5  | 2798  | noncoding | -       |
| MSTRG. 33403. 5  | 3916  | noncoding | -       |
| MSTRG. 33404. 1  | 2238  | noncoding | -       |
| MSTRG. 33405. 2  | 2457  | noncoding | -       |
| MSTRG. 33405. 3  | 3297  | noncoding | -       |
| MSTRG. 33417. 1  | 518   | noncoding | -       |
| MSTRG. 33419. 13 | 560   | coding    | PF05831 |
| MSTRG. 33419. 20 | 691   | coding    | PF05831 |
| MSTRG. 33419. 23 | 553   | coding    | PF05831 |
| MSTRG. 33419. 24 | 556   | coding    | PF05831 |
| MSTRG. 33408. 3  | 2846  | noncoding | -       |
| MSTRG. 33423. 3  | 4668  | coding    | PF02373 |
| MSTRG. 33423. 4  | 4794  | coding    | PF02373 |
| MSTRG. 33424. 1  | 5153  | coding    | PF16453 |
| MSTRG. 33424. 2  | 4988  | coding    | PF16453 |
| MSTRG. 33424. 3  | 4299  | coding    | PF16453 |
| MSTRG. 33443. 13 | 10894 | coding    | PF00632 |
| MSTRG. 33443. 9  | 14085 | coding    | PF00632 |
| MSTRG. 33443. 3  | 14237 | coding    | PF00632 |
| MSTRG. 33443. 11 | 14184 | coding    | PF00632 |
| MSTRG. 33443. 14 | 14304 | coding    | PF00632 |
| MSTRG. 33443. 6  | 14118 | coding    | PF00632 |
| MSTRG. 33443. 5  | 14003 | coding    | PF00632 |
| MSTRG. 33443. 15 | 40284 | coding    | PF00632 |
| MSTRG. 33448. 8  | 5953  | noncoding | -       |
| MSTRG. 33450. 1  | 4350  | noncoding | -       |
| MSTRG. 33451. 1  | 3584  | noncoding | -       |
| MSTRG. 33452. 1  | 4050  | noncoding | -       |
| MSTRG. 33453. 1  | 9055  | coding    | PF00069 |
| MSTRG. 33453. 2  | 9795  | coding    | PF00069 |

|                 |       |           |         |
|-----------------|-------|-----------|---------|
| MSTRG. 33453. 3 | 9795  | coding    | PF00069 |
| MSTRG. 33453. 4 | 8822  | coding    | PF00069 |
| MSTRG. 33453. 5 | 13472 | coding    | PF00069 |
| MSTRG. 33453. 6 | 5583  | coding    | PF00069 |
| MSTRG. 33430. 1 | 317   | noncoding | —       |
| MSTRG. 33439. 2 | 2140  | coding    | PF01926 |
| MSTRG. 33439. 3 | 3945  | coding    | PF01926 |
| MSTRG. 33444. 1 | 1359  | noncoding | —       |
| MSTRG. 33466. 2 | 2050  | coding    | PF04670 |
| MSTRG. 33467. 1 | 203   | noncoding | —       |
| MSTRG. 33482. 1 | 2061  | noncoding | —       |
| MSTRG. 33482. 3 | 2159  | coding    | PF04031 |
| MSTRG. 33483. 1 | 1243  | noncoding | —       |
| MSTRG. 33482. 5 | 2524  | coding    | PF04031 |
| MSTRG. 33482. 6 | 2059  | noncoding | —       |
| MSTRG. 33482. 7 | 2038  | noncoding | —       |
| MSTRG. 33482. 8 | 2029  | noncoding | —       |
| MSTRG. 33519. 1 | 2898  | coding    | PF15909 |
| MSTRG. 33521. 1 | 3684  | coding    | PF15909 |
| MSTRG. 33525. 1 | 447   | noncoding | —       |
| MSTRG. 33534. 1 | 1085  | noncoding | —       |
| MSTRG. 33534. 2 | 959   | noncoding | —       |
| MSTRG. 33535. 4 | 6928  | noncoding | —       |
| MSTRG. 33535. 5 | 5066  | noncoding | —       |
| MSTRG. 33535. 6 | 4549  | coding    | PF00782 |
| MSTRG. 33536. 1 | 480   | noncoding | —       |
| MSTRG. 33535. 7 | 4745  | coding    | PF00782 |
| MSTRG. 33537. 1 | 1259  | noncoding | —       |
| MSTRG. 33535. 8 | 1636  | noncoding | —       |
| MSTRG. 33535. 9 | 789   | coding    | PF00782 |
| MSTRG. 33546. 1 | 4691  | coding    | PF00270 |
| MSTRG. 33546. 3 | 4737  | coding    | PF00270 |
| MSTRG. 33548. 4 | 9209  | coding    | PF00443 |
| MSTRG. 33553. 1 | 6923  | coding    | PF08638 |
| MSTRG. 33553. 2 | 6827  | coding    | PF08638 |
| MSTRG. 33553. 3 | 6692  | coding    | PF08638 |
| MSTRG. 33555. 1 | 4517  | noncoding | —       |
| MSTRG. 33553. 8 | 4370  | coding    | PF08638 |
| MSTRG. 33550. 2 | 715   | coding    | PF03650 |
| MSTRG. 33559. 4 | 5313  | coding    | PF15808 |
| MSTRG. 33568. 1 | 452   | noncoding | —       |
| MSTRG. 33573. 1 | 11930 | coding    | PF05147 |
| MSTRG. 33577. 2 | 8498  | coding    | PF02319 |
| MSTRG. 33577. 1 | 4437  | noncoding | —       |
| MSTRG. 33587. 3 | 622   | noncoding | —       |
| MSTRG. 33609. 2 | 6822  | noncoding | —       |
| MSTRG. 33614. 1 | 1675  | noncoding | —       |
| MSTRG. 33613. 2 | 1630  | noncoding | —       |
| MSTRG. 33619. 1 | 1655  | noncoding | —       |
| MSTRG. 33619. 2 | 1566  | noncoding | —       |
| MSTRG. 33627. 2 | 1814  | coding    | PF12440 |
| MSTRG. 33629. 2 | 5266  | noncoding | —       |
| MSTRG. 33629. 1 | 3709  | noncoding | —       |
| MSTRG. 33629. 4 | 4470  | noncoding | —       |

|                 |       |           |         |
|-----------------|-------|-----------|---------|
| MSTRG. 33629.6  | 3510  | noncoding | -       |
| MSTRG. 33629.3  | 3714  | noncoding | -       |
| MSTRG. 33629.5  | 3702  | noncoding | -       |
| MSTRG. 33629.7  | 3707  | noncoding | -       |
| MSTRG. 33629.10 | 3514  | noncoding | -       |
| MSTRG. 33629.8  | 3502  | noncoding | -       |
| MSTRG. 33629.9  | 3514  | noncoding | -       |
| MSTRG. 33629.11 | 2518  | noncoding | -       |
| MSTRG. 33634.2  | 4834  | coding    | PF00136 |
| MSTRG. 33634.4  | 1973  | noncoding | -       |
| MSTRG. 33639.6  | 2918  | coding    | PF04704 |
| MSTRG. 33639.7  | 3782  | noncoding | -       |
| MSTRG. 33648.2  | 1113  | coding    | PF00578 |
| MSTRG. 33648.5  | 1162  | coding    | PF00578 |
| MSTRG. 33649.1  | 3453  | coding    | PF00270 |
| MSTRG. 33649.3  | 3208  | coding    | PF00270 |
| MSTRG. 33654.2  | 14771 | noncoding | -       |
| MSTRG. 33658.1  | 911   | coding    | PF00335 |
| MSTRG. 33662.3  | 6463  | coding    | PF00069 |
| MSTRG. 33662.4  | 7945  | coding    | PF00069 |
| MSTRG. 33661.1  | 3954  | coding    | PF01176 |
| MSTRG. 33664.6  | 2617  | coding    | PF05672 |
| MSTRG. 33664.2  | 3685  | coding    | PF05672 |
| MSTRG. 33664.3  | 5684  | coding    | PF05672 |
| MSTRG. 33664.4  | 3709  | coding    | PF05672 |
| MSTRG. 33664.7  | 3607  | coding    | PF05672 |
| MSTRG. 33664.8  | 3606  | coding    | PF05672 |
| MSTRG. 33664.9  | 3504  | coding    | PF05672 |
| MSTRG. 33664.10 | 4111  | noncoding | -       |
| MSTRG. 33666.1  | 1828  | coding    | PF14949 |
| MSTRG. 33669.2  | 4736  | noncoding | -       |
| MSTRG. 33669.1  | 8060  | noncoding | -       |
| MSTRG. 33670.2  | 3912  | coding    | PF00723 |
| MSTRG. 33676.1  | 3330  | noncoding | -       |
| MSTRG. 33676.2  | 3353  | noncoding | -       |
| MSTRG. 33676.3  | 2768  | noncoding | -       |
| MSTRG. 33679.1  | 1241  | noncoding | -       |
| MSTRG. 33679.2  | 1186  | noncoding | -       |
| MSTRG. 33681.1  | 3116  | coding    | PF00069 |
| MSTRG. 33682.1  | 1347  | noncoding | -       |
| MSTRG. 33683.1  | 7932  | noncoding | -       |
| MSTRG. 33683.2  | 7305  | noncoding | -       |
| MSTRG. 33683.3  | 5604  | noncoding | -       |
| MSTRG. 33686.2  | 1869  | noncoding | -       |
| MSTRG. 33687.3  | 3167  | noncoding | -       |
| MSTRG. 33688.2  | 11588 | coding    | PF15273 |
| MSTRG. 33690.1  | 22728 | noncoding | -       |
| MSTRG. 33690.2  | 8361  | noncoding | -       |
| MSTRG. 33692.1  | 27856 | noncoding | -       |
| MSTRG. 33692.2  | 39747 | noncoding | -       |
| MSTRG. 33692.3  | 30001 | noncoding | -       |
| MSTRG. 33709.1  | 1551  | noncoding | -       |
| MSTRG. 33709.2  | 1486  | noncoding | -       |
| MSTRG. 33709.3  | 1574  | noncoding | -       |

|                |       |           |         |
|----------------|-------|-----------|---------|
| MSTRG. 33709.4 | 1448  | noncoding | -       |
| MSTRG. 33709.5 | 1521  | noncoding | -       |
| MSTRG. 33709.6 | 1386  | noncoding | -       |
| MSTRG. 33712.1 | 2127  | coding    | PF08288 |
| MSTRG. 33712.2 | 3609  | coding    | PF08288 |
| MSTRG. 33713.1 | 1470  | coding    | PF12796 |
| MSTRG. 33714.1 | 3659  | noncoding | -       |
| MSTRG. 33729.1 | 4859  | coding    | PF01275 |
| MSTRG. 33731.1 | 3205  | noncoding | -       |
| MSTRG. 33744.3 | 2106  | coding    | PF05712 |
| MSTRG. 33754.2 | 592   | noncoding | -       |
| MSTRG. 33754.1 | 592   | noncoding | -       |
| MSTRG. 33754.4 | 592   | noncoding | -       |
| MSTRG. 33754.5 | 592   | noncoding | -       |
| MSTRG. 33754.3 | 663   | noncoding | -       |
| MSTRG. 33754.6 | 471   | noncoding | -       |
| MSTRG. 33756.2 | 2680  | coding    | PF00654 |
| MSTRG. 33760.1 | 456   | noncoding | -       |
| MSTRG. 33760.2 | 681   | noncoding | -       |
| MSTRG. 33764.1 | 535   | noncoding | -       |
| MSTRG. 33758.1 | 552   | noncoding | -       |
| MSTRG. 33768.1 | 3776  | coding    | PF02101 |
| MSTRG. 33768.2 | 20105 | noncoding | -       |
| MSTRG. 33768.3 | 18637 | noncoding | -       |
| MSTRG. 33768.4 | 2571  | coding    | PF00400 |
| MSTRG. 33769.1 | 7810  | noncoding | -       |
| MSTRG. 33770.1 | 6551  | noncoding | -       |
| MSTRG. 33768.5 | 3276  | noncoding | -       |
| MSTRG. 33768.6 | 5330  | noncoding | -       |
| MSTRG. 33771.1 | 6720  | noncoding | -       |
| MSTRG. 33772.1 | 4106  | noncoding | -       |
| MSTRG. 33773.1 | 7223  | noncoding | -       |
| MSTRG. 33787.1 | 1839  | noncoding | -       |
| MSTRG. 33789.1 | 777   | noncoding | -       |
| MSTRG. 33792.1 | 696   | noncoding | -       |
| MSTRG. 33793.1 | 945   | noncoding | -       |
| MSTRG. 33791.1 | 883   | noncoding | -       |
| MSTRG. 33813.2 | 6279  | coding    | PF00069 |
| MSTRG. 33813.4 | 8526  | coding    | PF00069 |
| MSTRG. 33813.5 | 9570  | coding    | PF00069 |
| MSTRG. 33813.6 | 6574  | coding    | PF00069 |
| MSTRG. 33815.1 | 7704  | noncoding | -       |
| MSTRG. 33817.1 | 2034  | noncoding | -       |
| MSTRG. 33819.2 | 1513  | coding    | PF00884 |
| MSTRG. 33820.1 | 5127  | noncoding | -       |
| MSTRG. 33820.2 | 4650  | noncoding | -       |
| MSTRG. 33820.4 | 4357  | noncoding | -       |
| MSTRG. 33822.1 | 432   | noncoding | -       |
| MSTRG. 33824.1 | 801   | noncoding | -       |
| MSTRG. 33817.2 | 4176  | coding    | PF00106 |
| MSTRG. 33817.4 | 4421  | noncoding | -       |
| MSTRG. 33804.1 | 637   | noncoding | -       |
| MSTRG. 33803.1 | 224   | noncoding | -       |
| MSTRG. 33805.1 | 323   | noncoding | -       |

|                |      |           |         |
|----------------|------|-----------|---------|
| MSTRG. 33806.1 | 366  | noncoding | —       |
| MSTRG. 33806.2 | 505  | noncoding | —       |
| MSTRG. 33809.1 | 462  | noncoding | —       |
| MSTRG. 33810.1 | 1288 | noncoding | —       |
| MSTRG. 33811.1 | 1104 | noncoding | —       |
| MSTRG. 33812.1 | 807  | noncoding | —       |
| MSTRG. 33812.2 | 412  | noncoding | —       |
| MSTRG. 33846.1 | 5744 | coding    | PF00069 |
| MSTRG. 33829.1 | 2136 | noncoding | —       |
| MSTRG. 33831.1 | 5593 | noncoding | —       |
| MSTRG. 33831.2 | 3972 | noncoding | —       |
| MSTRG. 33831.3 | 2221 | noncoding | —       |
| MSTRG. 33831.4 | 1592 | noncoding | —       |
| MSTRG. 33832.1 | 2571 | noncoding | —       |
| MSTRG. 33832.2 | 2761 | noncoding | —       |
| MSTRG. 33838.1 | 336  | noncoding | —       |
| MSTRG. 33839.1 | 429  | noncoding | —       |
| MSTRG. 33839.2 | 364  | noncoding | —       |
| MSTRG. 33841.1 | 2961 | noncoding | —       |
| MSTRG. 33843.1 | 4023 | coding    | PF00510 |
| MSTRG. 33851.1 | 405  | noncoding | —       |
| MSTRG. 33852.1 | 1050 | noncoding | —       |
| MSTRG. 33858.1 | 642  | noncoding | —       |
| MSTRG. 33860.1 | 1097 | noncoding | —       |
| MSTRG. 33861.1 | 1783 | noncoding | —       |
| MSTRG. 33863.1 | 890  | noncoding | —       |
| MSTRG. 33865.1 | 635  | noncoding | —       |
| MSTRG. 33868.1 | 8432 | noncoding | —       |
| MSTRG. 33868.2 | 5151 | noncoding | —       |
| MSTRG. 33869.1 | 301  | noncoding | —       |
| MSTRG. 33869.2 | 281  | noncoding | —       |
| MSTRG. 33875.1 | 3793 | noncoding | —       |
| MSTRG. 33875.2 | 5331 | noncoding | —       |
| MSTRG. 33875.4 | 2959 | noncoding | —       |
| MSTRG. 33875.6 | 3427 | noncoding | —       |
| MSTRG. 33874.1 | 334  | noncoding | —       |
| MSTRG. 33879.1 | 1291 | noncoding | —       |
| MSTRG. 33882.1 | 2586 | noncoding | —       |
| MSTRG. 33883.1 | 336  | noncoding | —       |
| MSTRG. 33886.1 | 1217 | noncoding | —       |
| MSTRG. 33880.1 | 1008 | noncoding | —       |
| MSTRG. 33881.1 | 410  | noncoding | —       |
| MSTRG. 33896.2 | 5352 | coding    | PF09162 |
| MSTRG. 33896.3 | 6517 | coding    | PF09162 |
| MSTRG. 33896.1 | 5839 | coding    | PF09162 |
| MSTRG. 33896.4 | 3857 | coding    | PF09162 |
| MSTRG. 33896.5 | 3330 | coding    | PF09162 |
| MSTRG. 33896.6 | 3358 | coding    | PF09162 |
| MSTRG. 33894.2 | 1032 | noncoding | —       |
| MSTRG. 33898.1 | 759  | noncoding | —       |
| MSTRG. 33898.2 | 759  | noncoding | —       |
| MSTRG. 33898.3 | 2105 | noncoding | —       |
| MSTRG. 33898.4 | 371  | noncoding | —       |
| MSTRG. 33898.5 | 923  | noncoding | —       |

|                 |       |           |         |
|-----------------|-------|-----------|---------|
| MSTRG. 33898.6  | 871   | noncoding | —       |
| MSTRG. 33899.1  | 1504  | noncoding | —       |
| MSTRG. 33899.2  | 2090  | noncoding | —       |
| MSTRG. 33899.3  | 2091  | noncoding | —       |
| MSTRG. 33899.4  | 2091  | noncoding | —       |
| MSTRG. 33898.7  | 414   | noncoding | —       |
| MSTRG. 33901.1  | 839   | noncoding | —       |
| MSTRG. 33901.2  | 804   | noncoding | —       |
| MSTRG. 33901.3  | 1772  | noncoding | —       |
| MSTRG. 33901.4  | 1373  | coding    | PF00069 |
| MSTRG. 33901.5  | 832   | noncoding | —       |
| MSTRG. 33901.6  | 368   | noncoding | —       |
| MSTRG. 33901.7  | 201   | noncoding | —       |
| MSTRG. 33901.8  | 804   | noncoding | —       |
| MSTRG. 33901.9  | 482   | noncoding | —       |
| MSTRG. 33903.1  | 2170  | noncoding | —       |
| MSTRG. 33910.1  | 244   | noncoding | —       |
| MSTRG. 33910.2  | 322   | noncoding | —       |
| MSTRG. 33914.2  | 2269  | noncoding | —       |
| MSTRG. 33914.1  | 2309  | noncoding | —       |
| MSTRG. 33914.3  | 1692  | noncoding | —       |
| MSTRG. 33917.1  | 319   | noncoding | —       |
| MSTRG. 33911.1  | 276   | noncoding | —       |
| MSTRG. 33920.2  | 3013  | noncoding | —       |
| MSTRG. 33920.3  | 2200  | noncoding | —       |
| MSTRG. 33921.2  | 1720  | noncoding | —       |
| MSTRG. 33921.3  | 3594  | noncoding | —       |
| MSTRG. 33922.1  | 719   | noncoding | —       |
| MSTRG. 33922.2  | 432   | noncoding | —       |
| MSTRG. 33949.1  | 449   | noncoding | —       |
| MSTRG. 33949.2  | 363   | noncoding | —       |
| MSTRG. 33949.3  | 609   | noncoding | —       |
| MSTRG. 33950.2  | 4605  | noncoding | —       |
| MSTRG. 33950.5  | 5598  | noncoding | —       |
| MSTRG. 33950.6  | 5540  | noncoding | —       |
| MSTRG. 33950.7  | 4713  | noncoding | —       |
| MSTRG. 33950.12 | 1186  | noncoding | —       |
| MSTRG. 33950.10 | 3821  | noncoding | —       |
| MSTRG. 33950.13 | 12321 | noncoding | —       |
| MSTRG. 33950.14 | 12470 | noncoding | —       |
| MSTRG. 33950.9  | 12387 | noncoding | —       |
| MSTRG. 33950.11 | 2288  | noncoding | —       |
| MSTRG. 33950.15 | 15199 | coding    | PF02093 |
| MSTRG. 33950.17 | 5081  | noncoding | —       |
| MSTRG. 33950.19 | 868   | noncoding | —       |
| MSTRG. 33953.1  | 1731  | noncoding | —       |
| MSTRG. 33931.1  | 4364  | noncoding | —       |
| MSTRG. 33932.1  | 373   | noncoding | —       |
| MSTRG. 33931.2  | 1808  | noncoding | —       |
| MSTRG. 33933.1  | 778   | noncoding | —       |
| MSTRG. 33934.1  | 538   | coding    | PF00069 |
| MSTRG. 33928.1  | 331   | noncoding | —       |
| MSTRG. 33929.1  | 2631  | noncoding | —       |
| MSTRG. 33935.1  | 434   | noncoding | —       |

|                 |       |           |         |
|-----------------|-------|-----------|---------|
| MSTRG. 33941.2  | 1829  | noncoding | —       |
| MSTRG. 33944.1  | 909   | noncoding | —       |
| MSTRG. 33946.1  | 596   | noncoding | —       |
| MSTRG. 33946.2  | 596   | noncoding | —       |
| MSTRG. 33946.3  | 360   | noncoding | —       |
| MSTRG. 33947.1  | 305   | noncoding | —       |
| MSTRG. 33960.1  | 4133  | noncoding | —       |
| MSTRG. 33960.2  | 9154  | coding    | PF02337 |
| MSTRG. 33960.7  | 1725  | noncoding | —       |
| MSTRG. 33960.8  | 1213  | noncoding | —       |
| MSTRG. 33960.9  | 1108  | noncoding | —       |
| MSTRG. 33960.10 | 1301  | noncoding | —       |
| MSTRG. 33960.11 | 1304  | noncoding | —       |
| MSTRG. 33963.1  | 422   | noncoding | —       |
| MSTRG. 33964.1  | 1989  | noncoding | —       |
| MSTRG. 33965.1  | 1194  | noncoding | —       |
| MSTRG. 33965.2  | 775   | noncoding | —       |
| MSTRG. 33966.1  | 278   | noncoding | —       |
| MSTRG. 33962.1  | 311   | noncoding | —       |
| MSTRG. 33962.2  | 309   | noncoding | —       |
| MSTRG. 33967.1  | 268   | noncoding | —       |
| MSTRG. 33985.4  | 9208  | noncoding | —       |
| MSTRG. 33985.7  | 16711 | noncoding | —       |
| MSTRG. 33985.10 | 5833  | noncoding | —       |
| MSTRG. 33985.9  | 2634  | noncoding | —       |
| MSTRG. 33985.11 | 16669 | noncoding | —       |
| MSTRG. 33979.1  | 846   | noncoding | —       |
| MSTRG. 33986.1  | 1296  | coding    | PF00069 |
| MSTRG. 33986.2  | 625   | coding    | PF00069 |
| MSTRG. 33986.3  | 451   | noncoding | —       |
| MSTRG. 33986.4  | 700   | noncoding | —       |
| MSTRG. 33987.1  | 696   | noncoding | —       |
| MSTRG. 33986.5  | 665   | noncoding | —       |
| MSTRG. 33992.1  | 482   | coding    | PF00069 |
| MSTRG. 33993.1  | 874   | noncoding | —       |
| MSTRG. 33993.2  | 875   | noncoding | —       |
| MSTRG. 33998.1  | 359   | noncoding | —       |
| MSTRG. 33999.1  | 249   | noncoding | —       |
| MSTRG. 34000.2  | 2935  | noncoding | —       |
| MSTRG. 34000.3  | 5338  | noncoding | —       |
| MSTRG. 34000.1  | 2413  | noncoding | —       |
| MSTRG. 34000.4  | 6316  | noncoding | —       |
| MSTRG. 34000.5  | 6316  | noncoding | —       |
| MSTRG. 34000.6  | 7346  | noncoding | —       |
| MSTRG. 34016.1  | 638   | noncoding | —       |
| MSTRG. 34016.2  | 524   | noncoding | —       |
| MSTRG. 34016.4  | 502   | noncoding | —       |
| MSTRG. 34016.5  | 1640  | noncoding | —       |
| MSTRG. 34016.6  | 1640  | noncoding | —       |
| MSTRG. 34016.3  | 1666  | noncoding | —       |
| MSTRG. 34016.7  | 504   | noncoding | —       |
| MSTRG. 34016.8  | 606   | noncoding | —       |
| MSTRG. 34016.9  | 732   | noncoding | —       |
| MSTRG. 34016.10 | 1301  | noncoding | —       |



|                  |      |           |         |
|------------------|------|-----------|---------|
| MSTRG. 34016. 11 | 936  | noncoding | —       |
| MSTRG. 34016. 12 | 924  | noncoding | —       |
| MSTRG. 34016. 13 | 431  | noncoding | —       |
| MSTRG. 34016. 15 | 1588 | noncoding | —       |
| MSTRG. 34016. 14 | 1599 | noncoding | —       |
| MSTRG. 34016. 16 | 1580 | noncoding | —       |
| MSTRG. 34016. 17 | 1108 | noncoding | —       |
| MSTRG. 34016. 18 | 1097 | noncoding | —       |
| MSTRG. 34012. 1  | 744  | noncoding | —       |
| MSTRG. 34013. 1  | 350  | noncoding | —       |
| MSTRG. 34017. 1  | 867  | noncoding | —       |
| MSTRG. 34017. 3  | 308  | noncoding | —       |
| MSTRG. 34017. 2  | 1438 | noncoding | —       |
| MSTRG. 34017. 4  | 611  | noncoding | —       |
| MSTRG. 34017. 5  | 1020 | noncoding | —       |
| MSTRG. 34018. 1  | 556  | noncoding | —       |
| MSTRG. 34026. 2  | 402  | noncoding | —       |
| MSTRG. 34028. 1  | 476  | noncoding | —       |
| MSTRG. 34035. 1  | 952  | coding    | PF14915 |
| MSTRG. 34037. 1  | 213  | noncoding | —       |
| MSTRG. 34038. 1  | 392  | noncoding | —       |
| MSTRG. 34046. 1  | 1948 | noncoding | —       |
| MSTRG. 34046. 2  | 2047 | noncoding | —       |
| MSTRG. 34046. 3  | 1724 | noncoding | —       |
| MSTRG. 34046. 4  | 5800 | noncoding | —       |
| MSTRG. 34046. 5  | 2116 | noncoding | —       |
| MSTRG. 34046. 6  | 6142 | noncoding | —       |
| MSTRG. 34047. 2  | 456  | noncoding | —       |
| MSTRG. 34052. 1  | 1149 | noncoding | —       |
| MSTRG. 34053. 1  | 419  | noncoding | —       |
| MSTRG. 34053. 2  | 397  | noncoding | —       |
| MSTRG. 34055. 1  | 843  | noncoding | —       |
| MSTRG. 34056. 2  | 2800 | noncoding | —       |
| MSTRG. 34066. 1  | 4438 | noncoding | —       |
| MSTRG. 34072. 1  | 323  | noncoding | —       |
| MSTRG. 34072. 2  | 368  | noncoding | —       |
| MSTRG. 34072. 3  | 322  | noncoding | —       |
| MSTRG. 34072. 4  | 322  | noncoding | —       |
| MSTRG. 34072. 5  | 276  | noncoding | —       |
| MSTRG. 34088. 1  | 497  | noncoding | —       |
| MSTRG. 34090. 1  | 295  | noncoding | —       |
| MSTRG. 34088. 2  | 278  | noncoding | —       |
| MSTRG. 34084. 1  | 243  | noncoding | —       |
| MSTRG. 34085. 1  | 214  | noncoding | —       |
| MSTRG. 34093. 1  | 1485 | coding    | PF00005 |
| MSTRG. 34094. 1  | 1495 | coding    | PF00005 |
| MSTRG. 34101. 1  | 975  | noncoding | —       |
| MSTRG. 34097. 1  | 229  | noncoding | —       |
| MSTRG. 34108. 2  | 1671 | noncoding | —       |
| MSTRG. 34110. 1  | 767  | noncoding | —       |
| MSTRG. 34110. 2  | 593  | noncoding | —       |
| MSTRG. 34129. 1  | 701  | noncoding | —       |
| MSTRG. 34130. 3  | 1076 | noncoding | —       |
| MSTRG. 34130. 1  | 1074 | noncoding | —       |

|                 |      |           |         |
|-----------------|------|-----------|---------|
| MSTRG. 34130.2  | 1075 | noncoding | -       |
| MSTRG. 34131.1  | 620  | noncoding | -       |
| MSTRG. 34131.2  | 519  | noncoding | -       |
| MSTRG. 34130.4  | 2247 | noncoding | -       |
| MSTRG. 34130.5  | 1076 | noncoding | -       |
| MSTRG. 34135.3  | 411  | noncoding | -       |
| MSTRG. 34135.1  | 414  | noncoding | -       |
| MSTRG. 34135.2  | 414  | noncoding | -       |
| MSTRG. 34135.4  | 413  | noncoding | -       |
| MSTRG. 34136.1  | 1350 | noncoding | -       |
| MSTRG. 34135.5  | 457  | noncoding | -       |
| MSTRG. 34137.3  | 878  | noncoding | -       |
| MSTRG. 34137.1  | 870  | noncoding | -       |
| MSTRG. 34137.2  | 870  | noncoding | -       |
| MSTRG. 34135.6  | 615  | noncoding | -       |
| MSTRG. 34133.1  | 377  | noncoding | -       |
| MSTRG. 34146.1  | 3239 | coding    | PF00005 |
| MSTRG. 34149.1  | 7834 | coding    | PF02994 |
| MSTRG. 34152.1  | 1043 | noncoding | -       |
| MSTRG. 34153.1  | 305  | noncoding | -       |
| MSTRG. 34185.7  | 6469 | coding    | PF00069 |
| MSTRG. 34185.8  | 1067 | noncoding | -       |
| MSTRG. 34185.10 | 1440 | coding    | PF00069 |
| MSTRG. 34185.9  | 738  | noncoding | -       |
| MSTRG. 34185.11 | 1181 | noncoding | -       |
| MSTRG. 34185.12 | 1115 | noncoding | -       |
| MSTRG. 34185.13 | 617  | noncoding | -       |
| MSTRG. 34185.15 | 8522 | coding    | PF00069 |
| MSTRG. 34185.14 | 3616 | coding    | PF00069 |
| MSTRG. 34185.16 | 723  | noncoding | -       |
| MSTRG. 34185.17 | 7866 | coding    | PF00069 |
| MSTRG. 34185.18 | 8024 | coding    | PF00069 |
| MSTRG. 34185.19 | 1079 | noncoding | -       |
| MSTRG. 34185.20 | 1010 | noncoding | -       |
| MSTRG. 34185.21 | 1612 | noncoding | -       |
| MSTRG. 34185.22 | 3509 | coding    | PF00069 |
| MSTRG. 34185.23 | 343  | coding    | PF00069 |
| MSTRG. 34154.1  | 289  | noncoding | -       |
| MSTRG. 34155.1  | 270  | noncoding | -       |
| MSTRG. 34154.2  | 264  | noncoding | -       |
| MSTRG. 34161.2  | 2453 | noncoding | -       |
| MSTRG. 34161.3  | 1687 | noncoding | -       |
| MSTRG. 34159.1  | 1033 | noncoding | -       |
| MSTRG. 34164.1  | 1507 | coding    | PF00069 |
| MSTRG. 34164.2  | 1639 | noncoding | -       |
| MSTRG. 34171.2  | 2633 | coding    | PF14915 |
| MSTRG. 34171.5  | 2704 | coding    | PF14915 |
| MSTRG. 34171.6  | 2472 | coding    | PF14915 |
| MSTRG. 34174.1  | 253  | noncoding | -       |
| MSTRG. 34178.1  | 673  | noncoding | -       |
| MSTRG. 34183.2  | 2766 | coding    | PF12796 |
| MSTRG. 34183.3  | 1519 | coding    | PF12796 |
| MSTRG. 34183.4  | 658  | noncoding | -       |
| MSTRG. 34190.1  | 3216 | coding    | PF14915 |

|                 |       |           |         |
|-----------------|-------|-----------|---------|
| MSTRG. 34190.2  | 3225  | coding    | PF14915 |
| MSTRG. 34190.6  | 2437  | coding    | PF14915 |
| MSTRG. 34190.9  | 2044  | coding    | PF12796 |
| MSTRG. 34169.1  | 916   | noncoding | —       |
| MSTRG. 34196.1  | 3898  | coding    | PF02994 |
| MSTRG. 34198.3  | 629   | coding    | PF05831 |
| MSTRG. 34198.4  | 587   | coding    | PF05831 |
| MSTRG. 34206.1  | 453   | noncoding | —       |
| MSTRG. 34202.1  | 2175  | noncoding | —       |
| MSTRG. 34209.1  | 751   | noncoding | —       |
| MSTRG. 34209.2  | 475   | noncoding | —       |
| MSTRG. 34210.1  | 352   | noncoding | —       |
| MSTRG. 34210.2  | 374   | noncoding | —       |
| MSTRG. 34219.1  | 283   | noncoding | —       |
| MSTRG. 34220.1  | 305   | noncoding | —       |
| MSTRG. 34219.2  | 283   | noncoding | —       |
| MSTRG. 34220.2  | 294   | noncoding | —       |
| MSTRG. 34220.3  | 396   | noncoding | —       |
| MSTRG. 34219.3  | 374   | noncoding | —       |
| MSTRG. 34225.1  | 730   | noncoding | —       |
| MSTRG. 34226.1  | 802   | noncoding | —       |
| MSTRG. 34235.1  | 292   | noncoding | —       |
| MSTRG. 34238.1  | 544   | noncoding | —       |
| MSTRG. 34252.1  | 1253  | noncoding | —       |
| MSTRG. 34252.2  | 1161  | noncoding | —       |
| MSTRG. 34252.3  | 1490  | noncoding | —       |
| MSTRG. 34252.4  | 1490  | noncoding | —       |
| MSTRG. 34272.1  | 14431 | noncoding | —       |
| MSTRG. 34272.2  | 14677 | noncoding | —       |
| MSTRG. 34272.4  | 15865 | noncoding | —       |
| MSTRG. 34272.3  | 13428 | noncoding | —       |
| MSTRG. 34272.6  | 13387 | noncoding | —       |
| MSTRG. 34272.5  | 14223 | noncoding | —       |
| MSTRG. 34272.7  | 11741 | noncoding | —       |
| MSTRG. 34272.8  | 13359 | noncoding | —       |
| MSTRG. 34272.9  | 13285 | noncoding | —       |
| MSTRG. 34293.1  | 1627  | noncoding | —       |
| MSTRG. 34294.1  | 776   | noncoding | —       |
| MSTRG. 34294.2  | 651   | noncoding | —       |
| MSTRG. 34295.1  | 9109  | noncoding | —       |
| MSTRG. 34295.2  | 4015  | noncoding | —       |
| MSTRG. 34295.4  | 1465  | noncoding | —       |
| MSTRG. 34295.3  | 1549  | noncoding | —       |
| MSTRG. 34295.5  | 1600  | noncoding | —       |
| MSTRG. 34294.3  | 21921 | noncoding | —       |
| MSTRG. 34294.4  | 17825 | noncoding | —       |
| MSTRG. 34294.6  | 15603 | noncoding | —       |
| MSTRG. 34294.5  | 15556 | noncoding | —       |
| MSTRG. 34295.6  | 4353  | noncoding | —       |
| MSTRG. 34294.8  | 1131  | noncoding | —       |
| MSTRG. 34294.7  | 14619 | noncoding | —       |
| MSTRG. 34294.9  | 23293 | noncoding | —       |
| MSTRG. 34295.7  | 357   | noncoding | —       |
| MSTRG. 34294.10 | 9109  | noncoding | —       |

|                  |       |           |         |
|------------------|-------|-----------|---------|
| MSTRG. 34294. 11 | 1574  | noncoding | —       |
| MSTRG. 34298. 1  | 341   | noncoding | —       |
| MSTRG. 34298. 2  | 337   | noncoding | —       |
| MSTRG. 34299. 1  | 412   | noncoding | —       |
| MSTRG. 34282. 1  | 1219  | noncoding | —       |
| MSTRG. 34283. 1  | 211   | noncoding | —       |
| MSTRG. 34284. 1  | 522   | noncoding | —       |
| MSTRG. 34287. 1  | 389   | noncoding | —       |
| MSTRG. 34300. 1  | 368   | coding    | PF00069 |
| MSTRG. 34302. 1  | 681   | coding    | PF00069 |
| MSTRG. 34303. 1  | 430   | noncoding | —       |
| MSTRG. 34314. 1  | 387   | noncoding | —       |
| MSTRG. 34314. 3  | 3225  | noncoding | —       |
| MSTRG. 34314. 4  | 4987  | noncoding | —       |
| MSTRG. 34314. 2  | 5283  | noncoding | —       |
| MSTRG. 34315. 1  | 37600 | coding    | PF00069 |
| MSTRG. 34315. 2  | 11420 | coding    | PF00069 |
| MSTRG. 34315. 3  | 3774  | noncoding | —       |
| MSTRG. 34315. 4  | 11534 | coding    | PF02994 |
| MSTRG. 34317. 2  | 7198  | noncoding | —       |
| MSTRG. 34317. 3  | 3456  | noncoding | —       |
| MSTRG. 34315. 5  | 17952 | noncoding | —       |
| MSTRG. 34315. 6  | 1939  | noncoding | —       |
| MSTRG. 34315. 7  | 5982  | noncoding | —       |
| MSTRG. 34315. 8  | 2503  | noncoding | —       |
| MSTRG. 34315. 10 | 2078  | noncoding | —       |
| MSTRG. 34315. 11 | 7155  | coding    | PF00069 |
| MSTRG. 34315. 9  | 4610  | noncoding | —       |
| MSTRG. 34304. 1  | 202   | noncoding | —       |
| MSTRG. 34305. 1  | 550   | noncoding | —       |
| MSTRG. 34306. 2  | 857   | noncoding | —       |
| MSTRG. 34306. 1  | 442   | noncoding | —       |
| MSTRG. 34307. 1  | 450   | noncoding | —       |
| MSTRG. 34307. 2  | 479   | noncoding | —       |
| MSTRG. 34308. 1  | 591   | noncoding | —       |
| MSTRG. 34321. 1  | 1929  | noncoding | —       |
| MSTRG. 34328. 1  | 951   | noncoding | —       |
| MSTRG. 34330. 1  | 336   | noncoding | —       |
| MSTRG. 34327. 1  | 582   | noncoding | —       |
| MSTRG. 34334. 2  | 784   | noncoding | —       |
| MSTRG. 34346. 1  | 767   | noncoding | —       |
| MSTRG. 34346. 2  | 1228  | noncoding | —       |
| MSTRG. 34346. 3  | 414   | noncoding | —       |
| MSTRG. 34346. 4  | 414   | noncoding | —       |
| MSTRG. 34342. 1  | 313   | noncoding | —       |
| MSTRG. 34342. 2  | 313   | noncoding | —       |
| MSTRG. 34351. 1  | 1515  | coding    | PF00069 |
| MSTRG. 34351. 3  | 803   | noncoding | —       |
| MSTRG. 34351. 2  | 754   | coding    | PF00069 |
| MSTRG. 34351. 4  | 1848  | coding    | PF00069 |
| MSTRG. 34351. 5  | 828   | coding    | PF00069 |
| MSTRG. 34351. 6  | 325   | noncoding | —       |
| MSTRG. 34351. 7  | 248   | noncoding | —       |
| MSTRG. 34351. 8  | 283   | noncoding | —       |

|                 |       |           |         |
|-----------------|-------|-----------|---------|
| MSTRG. 34349.1  | 384   | noncoding | -       |
| MSTRG. 34352.1  | 2105  | noncoding | -       |
| MSTRG. 34352.2  | 548   | noncoding | -       |
| MSTRG. 34369.1  | 11802 | coding    | PF14915 |
| MSTRG. 34369.2  | 8795  | coding    | PF12001 |
| MSTRG. 34369.3  | 12369 | coding    | PF12001 |
| MSTRG. 34369.4  | 9595  | coding    | PF12001 |
| MSTRG. 34369.5  | 8894  | coding    | PF12001 |
| MSTRG. 34369.7  | 2694  | noncoding | -       |
| MSTRG. 34369.8  | 7818  | coding    | PF14915 |
| MSTRG. 34369.9  | 5634  | noncoding | -       |
| MSTRG. 34369.10 | 1877  | noncoding | -       |
| MSTRG. 34369.11 | 1749  | coding    | PF14915 |
| MSTRG. 34356.1  | 782   | noncoding | -       |
| MSTRG. 34356.2  | 433   | noncoding | -       |
| MSTRG. 34357.1  | 836   | noncoding | -       |
| MSTRG. 34355.1  | 1118  | noncoding | -       |
| MSTRG. 34363.2  | 1640  | noncoding | -       |
| MSTRG. 34363.3  | 2409  | noncoding | -       |
| MSTRG. 34365.2  | 3968  | noncoding | -       |
| MSTRG. 34365.3  | 4058  | noncoding | -       |
| MSTRG. 34365.4  | 267   | noncoding | -       |
| MSTRG. 34361.1  | 470   | noncoding | -       |
| MSTRG. 34373.1  | 706   | noncoding | -       |
| MSTRG. 34373.2  | 808   | noncoding | -       |
| MSTRG. 34373.3  | 706   | noncoding | -       |
| MSTRG. 34374.1  | 506   | noncoding | -       |
| MSTRG. 34374.2  | 445   | noncoding | -       |
| MSTRG. 34374.3  | 354   | noncoding | -       |
| MSTRG. 34375.1  | 1077  | noncoding | -       |
| MSTRG. 34375.2  | 1079  | noncoding | -       |
| MSTRG. 34373.4  | 1025  | noncoding | -       |
| MSTRG. 34373.5  | 1025  | noncoding | -       |
| MSTRG. 34376.5  | 1065  | noncoding | -       |
| MSTRG. 34376.2  | 571   | noncoding | -       |
| MSTRG. 34376.4  | 1051  | noncoding | -       |
| MSTRG. 34376.3  | 1076  | noncoding | -       |
| MSTRG. 34376.6  | 3404  | noncoding | -       |
| MSTRG. 34376.7  | 1076  | noncoding | -       |
| MSTRG. 34376.1  | 1124  | noncoding | -       |
| MSTRG. 34383.1  | 945   | noncoding | -       |
| MSTRG. 34383.2  | 877   | noncoding | -       |
| MSTRG. 34383.3  | 422   | noncoding | -       |
| MSTRG. 34384.1  | 393   | noncoding | -       |
| MSTRG. 34389.1  | 435   | noncoding | -       |
| MSTRG. 34390.1  | 1138  | noncoding | -       |
| MSTRG. 34391.1  | 384   | noncoding | -       |
| MSTRG. 34393.1  | 6576  | noncoding | -       |
| MSTRG. 34395.2  | 1394  | noncoding | -       |
| MSTRG. 34394.1  | 1015  | noncoding | -       |
| MSTRG. 34394.3  | 1819  | noncoding | -       |
| MSTRG. 34400.1  | 769   | noncoding | -       |
| MSTRG. 34401.2  | 263   | noncoding | -       |
| MSTRG. 34401.1  | 254   | noncoding | -       |

|                  |      |           |         |
|------------------|------|-----------|---------|
| MSTRG. 34402. 1  | 357  | noncoding | -       |
| MSTRG. 34402. 2  | 357  | noncoding | -       |
| MSTRG. 34401. 3  | 599  | noncoding | -       |
| MSTRG. 34402. 3  | 466  | noncoding | -       |
| MSTRG. 34400. 2  | 1146 | noncoding | -       |
| MSTRG. 34411. 1  | 459  | coding    | PF02994 |
| MSTRG. 34414. 1  | 7020 | coding    | PF00069 |
| MSTRG. 34414. 2  | 4926 | coding    | PF00069 |
| MSTRG. 34414. 3  | 4923 | coding    | PF00069 |
| MSTRG. 34416. 1  | 600  | noncoding | -       |
| MSTRG. 34435. 10 | 2830 | coding    | PF09162 |
| MSTRG. 34435. 7  | 2816 | coding    | PF09162 |
| MSTRG. 34435. 8  | 2770 | coding    | PF09162 |
| MSTRG. 34435. 9  | 2830 | coding    | PF09162 |
| MSTRG. 34435. 2  | 2833 | coding    | PF09162 |
| MSTRG. 34418. 1  | 475  | noncoding | -       |
| MSTRG. 34420. 1  | 347  | noncoding | -       |
| MSTRG. 34421. 1  | 261  | noncoding | -       |
| MSTRG. 34422. 1  | 582  | noncoding | -       |
| MSTRG. 34427. 1  | 1510 | noncoding | -       |
| MSTRG. 34427. 2  | 1936 | coding    | PF00069 |
| MSTRG. 34427. 3  | 1921 | coding    | PF00069 |
| MSTRG. 34429. 2  | 267  | noncoding | -       |
| MSTRG. 34429. 1  | 622  | coding    | PF00069 |
| MSTRG. 34438. 1  | 286  | noncoding | -       |
| MSTRG. 34439. 1  | 362  | noncoding | -       |
| MSTRG. 34449. 1  | 325  | noncoding | -       |
| MSTRG. 34449. 2  | 1991 | noncoding | -       |
| MSTRG. 34449. 3  | 1232 | coding    | PF00069 |
| MSTRG. 34449. 4  | 819  | noncoding | -       |
| MSTRG. 34449. 5  | 2208 | noncoding | -       |
| MSTRG. 34449. 6  | 2202 | noncoding | -       |
| MSTRG. 34449. 7  | 2199 | noncoding | -       |
| MSTRG. 34449. 9  | 2595 | noncoding | -       |
| MSTRG. 34449. 8  | 2603 | noncoding | -       |
| MSTRG. 34449. 10 | 1380 | noncoding | -       |
| MSTRG. 34446. 1  | 880  | noncoding | -       |
| MSTRG. 34446. 2  | 245  | noncoding | -       |
| MSTRG. 34452. 1  | 760  | noncoding | -       |
| MSTRG. 34452. 2  | 297  | noncoding | -       |
| MSTRG. 34458. 1  | 961  | noncoding | -       |
| MSTRG. 34460. 1  | 541  | noncoding | -       |
| MSTRG. 34455. 1  | 418  | coding    | PF00069 |
| MSTRG. 34455. 2  | 354  | noncoding | -       |
| MSTRG. 34467. 1  | 567  | noncoding | -       |
| MSTRG. 34471. 1  | 443  | noncoding | -       |
| MSTRG. 34478. 1  | 4713 | noncoding | -       |
| MSTRG. 34482. 3  | 951  | noncoding | -       |
| MSTRG. 34481. 1  | 576  | noncoding | -       |
| MSTRG. 34486. 1  | 228  | noncoding | -       |
| MSTRG. 34489. 1  | 1531 | noncoding | -       |
| MSTRG. 34501. 1  | 435  | coding    | PF00164 |
| MSTRG. 34505. 1  | 2056 | coding    | PF00005 |
| MSTRG. 34511. 1  | 1484 | noncoding | -       |

|                 |       |           |         |
|-----------------|-------|-----------|---------|
| MSTRG. 34511.2  | 670   | noncoding | —       |
| MSTRG. 34511.3  | 670   | noncoding | —       |
| MSTRG. 34511.4  | 633   | noncoding | —       |
| MSTRG. 34512.1  | 638   | noncoding | —       |
| MSTRG. 34513.1  | 421   | noncoding | —       |
| MSTRG. 34514.1  | 283   | noncoding | —       |
| MSTRG. 34515.1  | 411   | noncoding | —       |
| MSTRG. 34519.2  | 663   | noncoding | —       |
| MSTRG. 34519.1  | 1553  | noncoding | —       |
| MSTRG. 34519.3  | 480   | noncoding | —       |
| MSTRG. 34519.4  | 480   | noncoding | —       |
| MSTRG. 34519.5  | 1107  | noncoding | —       |
| MSTRG. 34519.6  | 1109  | noncoding | —       |
| MSTRG. 34520.1  | 488   | noncoding | —       |
| MSTRG. 34521.1  | 205   | noncoding | —       |
| MSTRG. 34519.7  | 480   | noncoding | —       |
| MSTRG. 34524.1  | 757   | coding    | PF00069 |
| MSTRG. 34524.2  | 505   | coding    | PF00069 |
| MSTRG. 34524.3  | 617   | coding    | PF00069 |
| MSTRG. 34524.4  | 727   | coding    | PF00069 |
| MSTRG. 34524.5  | 726   | coding    | PF00069 |
| MSTRG. 34528.2  | 233   | noncoding | —       |
| MSTRG. 34528.1  | 1579  | noncoding | —       |
| MSTRG. 34529.1  | 1064  | noncoding | —       |
| MSTRG. 34537.1  | 7510  | coding    | PF00069 |
| MSTRG. 34537.3  | 2932  | noncoding | —       |
| MSTRG. 34537.2  | 769   | coding    | PF00069 |
| MSTRG. 34537.4  | 6508  | coding    | PF00069 |
| MSTRG. 34532.1  | 248   | noncoding | —       |
| MSTRG. 34554.1  | 1236  | noncoding | —       |
| MSTRG. 34556.1  | 873   | noncoding | —       |
| MSTRG. 34554.2  | 3684  | noncoding | —       |
| MSTRG. 34557.2  | 1375  | noncoding | —       |
| MSTRG. 34557.1  | 1185  | noncoding | —       |
| MSTRG. 34557.4  | 3135  | noncoding | —       |
| MSTRG. 34550.1  | 789   | noncoding | —       |
| MSTRG. 34550.2  | 302   | noncoding | —       |
| MSTRG. 34561.1  | 408   | noncoding | —       |
| MSTRG. 34561.2  | 203   | noncoding | —       |
| MSTRG. 34563.1  | 786   | noncoding | —       |
| MSTRG. 34621.2  | 3137  | noncoding | —       |
| MSTRG. 34621.1  | 2331  | noncoding | —       |
| MSTRG. 34621.3  | 11620 | noncoding | —       |
| MSTRG. 34621.4  | 1377  | noncoding | —       |
| MSTRG. 34621.5  | 4034  | noncoding | —       |
| MSTRG. 34622.1  | 1446  | noncoding | —       |
| MSTRG. 34621.8  | 2780  | noncoding | —       |
| MSTRG. 34621.6  | 2710  | noncoding | —       |
| MSTRG. 34621.7  | 1974  | noncoding | —       |
| MSTRG. 34621.11 | 2677  | noncoding | —       |
| MSTRG. 34621.12 | 2110  | noncoding | —       |
| MSTRG. 34621.10 | 3296  | noncoding | —       |
| MSTRG. 34621.9  | 2959  | noncoding | —       |
| MSTRG. 34621.13 | 3484  | noncoding | —       |

|                  |      |           |         |
|------------------|------|-----------|---------|
| MSTRG. 34621. 14 | 2756 | noncoding | —       |
| MSTRG. 34621. 15 | 1300 | noncoding | —       |
| MSTRG. 34621. 17 | 1368 | noncoding | —       |
| MSTRG. 34621. 16 | 620  | noncoding | —       |
| MSTRG. 34621. 18 | 1475 | noncoding | —       |
| MSTRG. 34622. 3  | 2857 | noncoding | —       |
| MSTRG. 34622. 4  | 2501 | noncoding | —       |
| MSTRG. 34622. 5  | 2516 | noncoding | —       |
| MSTRG. 34622. 6  | 1430 | noncoding | —       |
| MSTRG. 34622. 7  | 1413 | noncoding | —       |
| MSTRG. 34622. 8  | 3247 | noncoding | —       |
| MSTRG. 34622. 10 | 2849 | noncoding | —       |
| MSTRG. 34622. 9  | 2644 | noncoding | —       |
| MSTRG. 34622. 11 | 3152 | noncoding | —       |
| MSTRG. 34622. 12 | 2827 | noncoding | —       |
| MSTRG. 34622. 13 | 2865 | noncoding | —       |
| MSTRG. 34622. 14 | 2865 | noncoding | —       |
| MSTRG. 34622. 15 | 3047 | noncoding | —       |
| MSTRG. 34622. 16 | 2728 | noncoding | —       |
| MSTRG. 34568. 1  | 791  | noncoding | —       |
| MSTRG. 34568. 2  | 533  | noncoding | —       |
| MSTRG. 34569. 1  | 570  | noncoding | —       |
| MSTRG. 34570. 1  | 307  | coding    | PF07714 |
| MSTRG. 34572. 1  | 1029 | noncoding | —       |
| MSTRG. 34574. 1  | 241  | noncoding | —       |
| MSTRG. 34575. 1  | 235  | noncoding | —       |
| MSTRG. 34576. 1  | 276  | noncoding | —       |
| MSTRG. 34579. 2  | 1412 | noncoding | —       |
| MSTRG. 34580. 1  | 399  | noncoding | —       |
| MSTRG. 34583. 1  | 1030 | noncoding | —       |
| MSTRG. 34583. 2  | 2698 | noncoding | —       |
| MSTRG. 34587. 1  | 256  | noncoding | —       |
| MSTRG. 34592. 2  | 319  | noncoding | —       |
| MSTRG. 34592. 1  | 267  | noncoding | —       |
| MSTRG. 34592. 3  | 265  | noncoding | —       |
| MSTRG. 34592. 4  | 261  | noncoding | —       |
| MSTRG. 34592. 5  | 305  | noncoding | —       |
| MSTRG. 34595. 7  | 555  | noncoding | —       |
| MSTRG. 34595. 3  | 610  | noncoding | —       |
| MSTRG. 34595. 5  | 610  | noncoding | —       |
| MSTRG. 34595. 6  | 610  | noncoding | —       |
| MSTRG. 34595. 8  | 352  | noncoding | —       |
| MSTRG. 34595. 2  | 555  | noncoding | —       |
| MSTRG. 34595. 4  | 512  | noncoding | —       |
| MSTRG. 34595. 9  | 608  | noncoding | —       |
| MSTRG. 34595. 10 | 362  | noncoding | —       |
| MSTRG. 34595. 11 | 390  | noncoding | —       |
| MSTRG. 34595. 12 | 512  | noncoding | —       |
| MSTRG. 34595. 13 | 553  | noncoding | —       |
| MSTRG. 34595. 14 | 434  | noncoding | —       |
| MSTRG. 34595. 15 | 312  | noncoding | —       |
| MSTRG. 34595. 16 | 385  | noncoding | —       |
| MSTRG. 34600. 1  | 577  | noncoding | —       |
| MSTRG. 34601. 2  | 640  | noncoding | —       |



|                 |      |           |         |
|-----------------|------|-----------|---------|
| MSTRG. 34601.3  | 396  | noncoding | -       |
| MSTRG. 34601.1  | 401  | noncoding | -       |
| MSTRG. 34603.1  | 495  | coding    | PF00069 |
| MSTRG. 34600.2  | 3071 | coding    | PF00069 |
| MSTRG. 34600.3  | 1480 | noncoding | -       |
| MSTRG. 34606.1  | 655  | coding    | PF00069 |
| MSTRG. 34600.5  | 2508 | noncoding | -       |
| MSTRG. 34600.4  | 2253 | noncoding | -       |
| MSTRG. 34600.6  | 593  | noncoding | -       |
| MSTRG. 34597.1  | 696  | noncoding | -       |
| MSTRG. 34612.1  | 734  | noncoding | -       |
| MSTRG. 34613.1  | 536  | noncoding | -       |
| MSTRG. 34611.1  | 518  | noncoding | -       |
| MSTRG. 34616.1  | 367  | noncoding | -       |
| MSTRG. 34616.2  | 367  | noncoding | -       |
| MSTRG. 34616.3  | 332  | noncoding | -       |
| MSTRG. 34616.4  | 383  | noncoding | -       |
| MSTRG. 34616.5  | 367  | noncoding | -       |
| MSTRG. 34615.1  | 237  | noncoding | -       |
| MSTRG. 34619.1  | 383  | noncoding | -       |
| MSTRG. 34631.3  | 1309 | noncoding | -       |
| MSTRG. 34631.2  | 1957 | noncoding | -       |
| MSTRG. 34632.1  | 655  | noncoding | -       |
| MSTRG. 34633.1  | 488  | noncoding | -       |
| MSTRG. 34632.2  | 343  | noncoding | -       |
| MSTRG. 34638.2  | 5010 | coding    | PF01421 |
| MSTRG. 34638.1  | 1336 | coding    | PF01421 |
| MSTRG. 34637.2  | 3590 | coding    | PF01421 |
| MSTRG. 34637.4  | 3455 | coding    | PF01421 |
| MSTRG. 34653.1  | 742  | noncoding | -       |
| MSTRG. 34655.2  | 2731 | noncoding | -       |
| MSTRG. 34655.1  | 3208 | noncoding | -       |
| MSTRG. 34656.2  | 732  | noncoding | -       |
| MSTRG. 34656.1  | 1160 | noncoding | -       |
| MSTRG. 34657.1  | 1316 | noncoding | -       |
| MSTRG. 34660.1  | 228  | noncoding | -       |
| MSTRG. 34661.1  | 337  | noncoding | -       |
| MSTRG. 34653.2  | 526  | noncoding | -       |
| MSTRG. 34664.1  | 713  | noncoding | -       |
| MSTRG. 34666.1  | 519  | noncoding | -       |
| MSTRG. 34671.1  | 2707 | noncoding | -       |
| MSTRG. 34646.1  | 210  | noncoding | -       |
| MSTRG. 34647.3  | 652  | coding    | PF05831 |
| MSTRG. 34647.1  | 761  | coding    | PF05831 |
| MSTRG. 34675.3  | 536  | coding    | PF05831 |
| MSTRG. 34675.2  | 462  | coding    | PF05831 |
| MSTRG. 34675.4  | 419  | coding    | PF05831 |
| MSTRG. 34675.5  | 401  | coding    | PF05831 |
| MSTRG. 34681.2  | 5164 | coding    | PF02023 |
| MSTRG. 34681.4  | 1594 | coding    | PF02023 |
| MSTRG. 34681.3  | 3276 | coding    | PF02023 |
| MSTRG. 34682.7  | 1729 | coding    | PF02023 |
| MSTRG. 34682.9  | 1717 | coding    | PF02023 |
| MSTRG. 34682.11 | 1765 | coding    | PF02023 |

|                  |      |           |         |
|------------------|------|-----------|---------|
| MSTRG. 34682. 12 | 1765 | coding    | PF02023 |
| MSTRG. 34683. 1  | 481  | noncoding | —       |
| MSTRG. 34707. 1  | 350  | noncoding | —       |
| MSTRG. 34708. 1  | 285  | noncoding | —       |
| MSTRG. 34712. 1  | 1006 | noncoding | —       |
| MSTRG. 34714. 1  | 765  | noncoding | —       |
| MSTRG. 34715. 1  | 1186 | noncoding | —       |
| MSTRG. 34716. 1  | 236  | noncoding | —       |
| MSTRG. 34717. 1  | 1523 | noncoding | —       |
| MSTRG. 34715. 2  | 1519 | noncoding | —       |
| MSTRG. 34715. 3  | 1137 | noncoding | —       |
| MSTRG. 34718. 1  | 506  | noncoding | —       |
| MSTRG. 34719. 1  | 314  | noncoding | —       |
| MSTRG. 34720. 1  | 1113 | noncoding | —       |
| MSTRG. 34721. 1  | 2316 | noncoding | —       |
| MSTRG. 34722. 1  | 587  | noncoding | —       |
| MSTRG. 34715. 4  | 1937 | noncoding | —       |
| MSTRG. 34723. 1  | 563  | noncoding | —       |
| MSTRG. 34723. 2  | 984  | noncoding | —       |
| MSTRG. 34724. 1  | 1689 | noncoding | —       |
| MSTRG. 34725. 1  | 349  | noncoding | —       |
| MSTRG. 34719. 2  | 1296 | noncoding | —       |
| MSTRG. 34717. 2  | 677  | noncoding | —       |
| MSTRG. 34717. 3  | 587  | noncoding | —       |
| MSTRG. 34726. 1  | 1296 | noncoding | —       |
| MSTRG. 34715. 5  | 798  | noncoding | —       |
| MSTRG. 34727. 1  | 510  | noncoding | —       |
| MSTRG. 34687. 1  | 414  | noncoding | —       |
| MSTRG. 34689. 2  | 545  | noncoding | —       |
| MSTRG. 34690. 2  | 3378 | coding    | PF13855 |
| MSTRG. 34692. 1  | 302  | noncoding | —       |
| MSTRG. 34701. 1  | 461  | noncoding | —       |
| MSTRG. 34702. 1  | 481  | noncoding | —       |
| MSTRG. 34729. 1  | 776  | noncoding | —       |
| MSTRG. 34743. 1  | 852  | coding    | PF11976 |
| MSTRG. 34743. 2  | 955  | coding    | PF11976 |
| MSTRG. 34744. 2  | 1673 | noncoding | —       |
| MSTRG. 34744. 3  | 1673 | noncoding | —       |
| MSTRG. 34744. 4  | 1529 | noncoding | —       |
| MSTRG. 34744. 5  | 5445 | coding    | PF16212 |
| MSTRG. 34751. 1  | 1174 | noncoding | —       |
| MSTRG. 34755. 2  | 2744 | noncoding | —       |
| MSTRG. 34755. 1  | 3534 | noncoding | —       |
| MSTRG. 34761. 2  | 906  | coding    | PF15300 |
| MSTRG. 34763. 2  | 1399 | noncoding | —       |
| MSTRG. 34764. 1  | 503  | noncoding | —       |
| MSTRG. 34771. 9  | 605  | noncoding | —       |
| MSTRG. 34771. 13 | 604  | noncoding | —       |
| MSTRG. 34778. 1  | 615  | noncoding | —       |
| MSTRG. 34778. 3  | 431  | noncoding | —       |
| MSTRG. 34778. 4  | 431  | noncoding | —       |
| MSTRG. 34778. 5  | 610  | noncoding | —       |
| MSTRG. 34778. 6  | 610  | noncoding | —       |
