# Supplementary material for: Identification of Novel lncRNA and Differentially Expressed Genes (DEGs) of Testicular Tissues among Cattle, Yak, and Cattle-Yak Associated with Male Infertility
Source: MDPI journal article supplement (doi:10.3390/ani11082420), 2021-08-17
Supplement: s1 [file s1]

Table S6 The significantly enriched GO description of BP, CC and MF  
for up-regulated lncRNA target genes of cattle

| Ontology | Term                                      | GO.ID      | Significant | Annotated | Qvalue |
|----------|-------------------------------------------|------------|-------------|-----------|--------|
| BP       | reproductive process                      | GO:0022414 | 2           | 1188      | 1      |
| BP       | reproduction                              | GO:0000003 | 2           | 1190      | 1      |
| BP       | multicellular organismal process          | GO:0032501 | 3           | 6664      | 1      |
| BP       | positive regulation of biological process | GO:0048518 | 2           | 4757      | 1      |
| BP       | localization                              | GO:0051179 | 2           | 5065      | 1      |
| BP       | developmental process                     | GO:0032502 | 2           | 5268      | 1      |
| BP       | signaling                                 | GO:0023052 | 2           | 6065      | 1      |
| BP       | regulation of biological process          | GO:0050789 | 3           | 10466     | 1      |
| BP       | biological regulation                     | GO:0065007 | 3           | 11042     | 1      |
| BP       | cellular process                          | GO:0009987 | 3           | 14842     | 1      |
| CC       | extracellular region                      | GO:0005576 | 3           | 4337      | 1      |
| CC       | extracellular region part                 | GO:0044421 | 2           | 3507      | 1      |
| CC       | organelle                                 | GO:0043226 | 5           | 12576     | 1      |
| CC       | membrane                                  | GO:0016020 | 3           | 9946      | 1      |
| CC       | membrane-enclosed lumen                   | GO:0031974 | 1           | 3755      | 1      |
| CC       | protein-containing complex                | GO:0032991 | 1           | 4316      | 1      |
| CC       | cell part                                 | GO:0044464 | 5           | 16747     | 1      |
| CC       | cell                                      | GO:0005623 | 5           | 16775     | 1      |
| CC       | membrane part                             | GO:0044425 | 1           | 7766      | 1      |
| CC       | organelle part                            | GO:0044422 | 1           | 7853      | 1      |
| MF       | catalytic activity                        | GO:0003824 | 2           | 5764      | 1      |
| MF       | binding                                   | GO:0005488 | 1           | 10991     | 1      |
