# Supplementary material for: Identification of Novel lncRNA and Differentially Expressed Genes (DEGs) of Testicular Tissues among Cattle, Yak, and Cattle-Yak Associated with Male Infertility
Source: MDPI journal article supplement (doi:10.3390/ani11082420), 2021-08-17
Supplement: s1 [file s1]

|               |            |           |
|---------------|------------|-----------|
| MSTRG. 12. 1  | 0. 600758  | coding    |
| MSTRG. 12. 2  | -0. 953233 | noncoding |
| MSTRG. 12. 3  | 0. 336613  | coding    |
| MSTRG. 32. 2  | 0. 736719  | coding    |
| MSTRG. 33. 1  | -1. 47646  | noncoding |
| MSTRG. 34. 2  | 1. 01813   | coding    |
| MSTRG. 35. 1  | -1. 1028   | noncoding |
| MSTRG. 39. 3  | -2. 26072  | noncoding |
| MSTRG. 39. 6  | 1. 22803   | coding    |
| MSTRG. 59. 3  | 0. 93239   | coding    |
| MSTRG. 60. 1  | -1. 03311  | noncoding |
| MSTRG. 61. 1  | -0. 38279  | noncoding |
| MSTRG. 60. 2  | -0. 299877 | noncoding |
| MSTRG. 63. 2  | 2. 19406   | coding    |
| MSTRG. 63. 4  | 2. 18397   | coding    |
| MSTRG. 63. 6  | 1. 99462   | coding    |
| MSTRG. 63. 7  | 2. 10208   | coding    |
| MSTRG. 63. 5  | 1. 62219   | coding    |
| MSTRG. 63. 8  | 2. 19354   | coding    |
| MSTRG. 63. 3  | 2. 10572   | coding    |
| MSTRG. 65. 10 | 1. 91514   | coding    |
| MSTRG. 65. 11 | 1. 79222   | coding    |
| MSTRG. 65. 4  | 1. 81497   | coding    |
| MSTRG. 65. 5  | 1. 79537   | coding    |
| MSTRG. 65. 6  | 1. 90983   | coding    |
| MSTRG. 65. 8  | 1. 7945    | coding    |
| MSTRG. 65. 9  | 1. 85825   | coding    |
| MSTRG. 65. 14 | 1. 85715   | coding    |
| MSTRG. 65. 15 | 1. 87842   | coding    |
| MSTRG. 65. 16 | 1. 81366   | coding    |
| MSTRG. 66. 1  | 1. 28082   | coding    |
| MSTRG. 66. 2  | 1. 27372   | coding    |
| MSTRG. 66. 3  | 1. 28684   | coding    |
| MSTRG. 66. 4  | 1. 33317   | coding    |
| MSTRG. 68. 2  | 0. 333751  | coding    |
| MSTRG. 42. 1  | 1. 62891   | coding    |
| MSTRG. 56. 2  | 2. 48424   | coding    |
| MSTRG. 56. 4  | 2. 62509   | coding    |
| MSTRG. 56. 6  | 2. 43996   | coding    |
| MSTRG. 56. 7  | 2. 8558    | coding    |
| MSTRG. 56. 8  | 2. 95323   | coding    |
| MSTRG. 52. 1  | 1. 73654   | coding    |
| MSTRG. 52. 2  | 1. 77941   | coding    |
| MSTRG. 53. 1  | 1. 1575    | coding    |
| MSTRG. 53. 2  | 0. 16988   | coding    |
| MSTRG. 70. 1  | 0. 534174  | coding    |
| MSTRG. 73. 2  | 0. 760232  | coding    |
| MSTRG. 78. 1  | 0. 697796  | coding    |
| MSTRG. 79. 2  | 0. 701041  | coding    |
| MSTRG. 78. 2  | 0. 928397  | coding    |
| MSTRG. 80. 1  | -2. 46119  | noncoding |
| MSTRG. 81. 1  | -2. 16966  | noncoding |
| MSTRG. 79. 3  | 0. 520742  | coding    |
| MSTRG. 82. 1  | -1. 90665  | noncoding |

|               |            |           |
|---------------|------------|-----------|
| MSTRG. 79. 4  | -0. 6246   | noncoding |
| MSTRG. 79. 5  | 0. 280853  | coding    |
| MSTRG. 79. 6  | -0. 132703 | noncoding |
| MSTRG. 83. 1  | 0. 378672  | coding    |
| MSTRG. 79. 7  | -0. 440016 | noncoding |
| MSTRG. 85. 1  | 0. 544405  | coding    |
| MSTRG. 86. 1  | 0. 170831  | coding    |
| MSTRG. 96. 9  | 2. 7665    | coding    |
| MSTRG. 96. 10 | 2. 97586   | coding    |
| MSTRG. 96. 6  | 2. 52525   | coding    |
| MSTRG. 96. 8  | 2. 87884   | coding    |
| MSTRG. 96. 3  | 2. 7532    | coding    |
| MSTRG. 97. 1  | 0. 494862  | coding    |
| MSTRG. 97. 2  | 0. 717318  | coding    |
| MSTRG. 91. 1  | -0. 700066 | noncoding |
| MSTRG. 103. 6 | 2. 00318   | coding    |
| MSTRG. 103. 2 | 2. 44298   | coding    |
| MSTRG. 103. 5 | 2. 71819   | coding    |
| MSTRG. 103. 4 | 3. 45832   | coding    |
| MSTRG. 104. 1 | 0. 209428  | coding    |
| MSTRG. 104. 3 | 0. 664894  | coding    |
| MSTRG. 111. 1 | -1. 4473   | noncoding |
| MSTRG. 117. 6 | 1. 37478   | coding    |
| MSTRG. 118. 5 | -0. 94778  | noncoding |
| MSTRG. 123. 1 | -1. 55434  | noncoding |
| MSTRG. 127. 1 | -1. 75338  | noncoding |
| MSTRG. 131. 1 | -2. 12335  | noncoding |
| MSTRG. 132. 1 | -1. 40244  | noncoding |
| MSTRG. 134. 1 | -2. 28285  | noncoding |
| MSTRG. 151. 1 | -1. 05069  | noncoding |
| MSTRG. 188. 1 | 0. 00003   | coding    |
| MSTRG. 189. 1 | -1. 25433  | noncoding |
| MSTRG. 193. 1 | -1. 76131  | noncoding |
| MSTRG. 196. 1 | 1. 35332   | coding    |
| MSTRG. 223. 1 | -1. 18267  | noncoding |
| MSTRG. 241. 1 | -0. 862553 | noncoding |
| MSTRG. 158. 1 | 1. 78356   | coding    |
| MSTRG. 158. 6 | 1. 36339   | coding    |
| MSTRG. 158. 5 | 1. 4761    | coding    |
| MSTRG. 158. 4 | 2. 08287   | coding    |
| MSTRG. 158. 8 | 1. 16037   | coding    |
| MSTRG. 158. 7 | 1. 77877   | coding    |
| MSTRG. 158. 9 | 1. 72368   | coding    |
| MSTRG. 160. 1 | 0. 31039   | coding    |
| MSTRG. 160. 3 | 1. 80305   | coding    |
| MSTRG. 160. 4 | 1. 75262   | coding    |
| MSTRG. 160. 5 | 0. 993379  | coding    |
| MSTRG. 160. 6 | 0. 81964   | coding    |
| MSTRG. 161. 1 | -1. 11556  | noncoding |
| MSTRG. 162. 1 | 0. 84792   | coding    |
| MSTRG. 162. 2 | 0. 087269  | coding    |
| MSTRG. 160. 7 | 0. 826628  | coding    |
| MSTRG. 163. 1 | 1. 51286   | coding    |
| MSTRG. 163. 3 | 2. 1411    | coding    |

|                |            |           |
|----------------|------------|-----------|
| MSTRG. 164. 1  | 0. 612102  | coding    |
| MSTRG. 166. 2  | 0. 89045   | coding    |
| MSTRG. 168. 2  | -0. 440224 | noncoding |
| MSTRG. 169. 1  | -2. 35918  | noncoding |
| MSTRG. 175. 3  | 2. 39172   | coding    |
| MSTRG. 175. 4  | 0. 44992   | coding    |
| MSTRG. 175. 5  | 2. 13964   | coding    |
| MSTRG. 175. 6  | 1. 70182   | coding    |
| MSTRG. 265. 8  | 0. 246941  | coding    |
| MSTRG. 265. 9  | 0. 284625  | coding    |
| MSTRG. 266. 1  | -1. 93636  | noncoding |
| MSTRG. 267. 1  | 1. 38845   | coding    |
| MSTRG. 268. 1  | -0. 165034 | noncoding |
| MSTRG. 269. 1  | -0. 122026 | noncoding |
| MSTRG. 268. 2  | 0. 63255   | coding    |
| MSTRG. 270. 1  | -0. 350686 | noncoding |
| MSTRG. 271. 1  | 0. 072162  | coding    |
| MSTRG. 272. 1  | 0. 527137  | coding    |
| MSTRG. 273. 1  | -0. 20225  | noncoding |
| MSTRG. 274. 1  | 0. 673108  | coding    |
| MSTRG. 275. 1  | -0. 403531 | noncoding |
| MSTRG. 276. 1  | -1. 56678  | noncoding |
| MSTRG. 277. 1  | 0. 220668  | coding    |
| MSTRG. 277. 2  | 0. 449083  | coding    |
| MSTRG. 278. 1  | 0. 579922  | coding    |
| MSTRG. 265. 10 | -0. 364923 | noncoding |
| MSTRG. 265. 11 | 0. 330961  | coding    |
| MSTRG. 279. 1  | -0. 210703 | noncoding |
| MSTRG. 265. 12 | 0. 627157  | coding    |
| MSTRG. 280. 1  | -0. 791325 | noncoding |
| MSTRG. 281. 1  | -0. 026799 | noncoding |
| MSTRG. 282. 1  | -0. 263031 | noncoding |
| MSTRG. 283. 1  | -1. 13039  | noncoding |
| MSTRG. 284. 1  | -0. 061492 | noncoding |
| MSTRG. 284. 2  | -0. 265482 | noncoding |
| MSTRG. 265. 14 | 0. 136595  | coding    |
| MSTRG. 285. 1  | -0. 731737 | noncoding |
| MSTRG. 250. 1  | -0. 500563 | noncoding |
| MSTRG. 255. 1  | 0. 284118  | coding    |
| MSTRG. 258. 1  | 0. 089416  | coding    |
| MSTRG. 261. 1  | -1. 04678  | noncoding |
| MSTRG. 262. 1  | -0. 949817 | noncoding |
| MSTRG. 263. 1  | -1. 22275  | noncoding |
| MSTRG. 297. 1  | -1. 78404  | noncoding |
| MSTRG. 307. 1  | 1. 47198   | coding    |
| MSTRG. 308. 1  | -1. 91936  | noncoding |
| MSTRG. 312. 1  | -1. 42255  | noncoding |
| MSTRG. 314. 1  | 2. 13355   | coding    |
| MSTRG. 314. 3  | 1. 71728   | coding    |
| MSTRG. 325. 3  | 2. 30679   | coding    |
| MSTRG. 325. 4  | 2. 1774    | coding    |
| MSTRG. 326. 1  | -0. 037483 | noncoding |
| MSTRG. 327. 1  | -0. 042033 | noncoding |
| MSTRG. 324. 1  | -1. 80101  | noncoding |

|               |           |           |
|---------------|-----------|-----------|
| MSTRG. 328. 1 | -1.29973  | noncoding |
| MSTRG. 328. 2 | 0.603325  | coding    |
| MSTRG. 332. 1 | 0.845598  | coding    |
| MSTRG. 348. 1 | -2.15213  | noncoding |
| MSTRG. 351. 1 | 1.84647   | coding    |
| MSTRG. 352. 1 | -0.393894 | noncoding |
| MSTRG. 353. 1 | -1.85046  | noncoding |
| MSTRG. 356. 1 | -0.728365 | noncoding |
| MSTRG. 361. 1 | -2.27956  | noncoding |
| MSTRG. 375. 2 | 1.18909   | coding    |
| MSTRG. 375. 5 | 1.2496    | coding    |
| MSTRG. 377. 1 | -1.91754  | noncoding |
| MSTRG. 377. 2 | -1.27699  | noncoding |
| MSTRG. 379. 3 | 0.783254  | coding    |
| MSTRG. 379. 5 | 0.852872  | coding    |
| MSTRG. 369. 1 | -2.29029  | noncoding |
| MSTRG. 370. 1 | -2.21644  | noncoding |
| MSTRG. 371. 1 | 0.804592  | coding    |
| MSTRG. 381. 3 | 1.8541    | coding    |
| MSTRG. 396. 1 | -0.412469 | noncoding |
| MSTRG. 397. 1 | 0.602873  | coding    |
| MSTRG. 396. 3 | 0.212855  | coding    |
| MSTRG. 398. 1 | -0.688465 | noncoding |
| MSTRG. 399. 1 | 0.800982  | coding    |
| MSTRG. 400. 1 | -1.14582  | noncoding |
| MSTRG. 401. 1 | 0.268959  | coding    |
| MSTRG. 404. 3 | 2.20421   | coding    |
| MSTRG. 404. 4 | 1.72885   | coding    |
| MSTRG. 404. 6 | 1.71791   | coding    |
| MSTRG. 404. 5 | 1.39812   | coding    |
| MSTRG. 404. 7 | 1.60239   | coding    |
| MSTRG. 404. 8 | -0.079951 | noncoding |
| MSTRG. 391. 3 | 2.40272   | coding    |
| MSTRG. 392. 2 | 0.358125  | coding    |
| MSTRG. 393. 2 | -0.634363 | noncoding |
| MSTRG. 405. 1 | 1.63237   | coding    |
| MSTRG. 405. 7 | 1.74228   | coding    |
| MSTRG. 405. 3 | 2.02436   | coding    |
| MSTRG. 405. 4 | 1.77925   | coding    |
| MSTRG. 405. 5 | 2.01252   | coding    |
| MSTRG. 405. 6 | 1.98351   | coding    |
| MSTRG. 405. 8 | 2.20561   | coding    |
| MSTRG. 405. 9 | -0.555047 | noncoding |
| MSTRG. 407. 1 | -0.185521 | noncoding |
| MSTRG. 416. 1 | -1.08389  | noncoding |
| MSTRG. 423. 2 | 1.4724    | coding    |
| MSTRG. 424. 1 | 1.88048   | coding    |
| MSTRG. 424. 2 | 2.2125    | coding    |
| MSTRG. 424. 3 | 1.03772   | coding    |
| MSTRG. 426. 1 | 0.367243  | coding    |
| MSTRG. 427. 1 | 0.474269  | coding    |
| MSTRG. 429. 1 | 1.62043   | coding    |
| MSTRG. 429. 2 | 1.52683   | coding    |
| MSTRG. 449. 1 | -2.529    | noncoding |

|                |            |           |
|----------------|------------|-----------|
| MSTRG. 451. 1  | 0. 796103  | coding    |
| MSTRG. 451. 2  | 0. 764155  | coding    |
| MSTRG. 452. 1  | -1. 67087  | noncoding |
| MSTRG. 457. 1  | -0. 197596 | noncoding |
| MSTRG. 435. 3  | -1. 17573  | noncoding |
| MSTRG. 439. 1  | -1. 43247  | noncoding |
| MSTRG. 438. 2  | 0. 852584  | coding    |
| MSTRG. 440. 1  | 0. 310851  | coding    |
| MSTRG. 441. 1  | 0. 94304   | coding    |
| MSTRG. 467. 6  | 0. 658156  | coding    |
| MSTRG. 467. 7  | -1. 65261  | noncoding |
| MSTRG. 468. 1  | 0. 848488  | coding    |
| MSTRG. 468. 2  | 0. 506827  | coding    |
| MSTRG. 468. 3  | -0. 288589 | noncoding |
| MSTRG. 468. 4  | 0. 242605  | coding    |
| MSTRG. 468. 5  | 1. 27702   | coding    |
| MSTRG. 470. 1  | -0. 691017 | noncoding |
| MSTRG. 467. 10 | 1. 8731    | coding    |
| MSTRG. 467. 9  | 1. 83605   | coding    |
| MSTRG. 467. 11 | 1. 88007   | coding    |
| MSTRG. 471. 1  | 0. 348136  | coding    |
| MSTRG. 472. 1  | -0. 781097 | noncoding |
| MSTRG. 463. 1  | 1. 57428   | coding    |
| MSTRG. 463. 4  | 1. 88277   | coding    |
| MSTRG. 464. 1  | -0. 83669  | noncoding |
| MSTRG. 474. 1  | -0. 642923 | noncoding |
| MSTRG. 479. 1  | 1. 23057   | coding    |
| MSTRG. 481. 2  | -0. 479506 | noncoding |
| MSTRG. 481. 1  | 0. 060946  | coding    |
| MSTRG. 487. 2  | 0. 865002  | coding    |
| MSTRG. 488. 3  | 1. 25823   | coding    |
| MSTRG. 484. 1  | -2. 26518  | noncoding |
| MSTRG. 493. 1  | -2. 54975  | noncoding |
| MSTRG. 497. 1  | -2. 0426   | noncoding |
| MSTRG. 506. 1  | -1. 37227  | noncoding |
| MSTRG. 508. 3  | 2. 93655   | coding    |
| MSTRG. 508. 4  | 3. 28679   | coding    |
| MSTRG. 508. 2  | 2. 84809   | coding    |
| MSTRG. 508. 5  | 1. 58392   | coding    |
| MSTRG. 509. 1  | -0. 863191 | noncoding |
| MSTRG. 512. 2  | -0. 524706 | noncoding |
| MSTRG. 513. 4  | 1. 78877   | coding    |
| MSTRG. 514. 4  | 0. 885465  | coding    |
| MSTRG. 514. 3  | 0. 83877   | coding    |
| MSTRG. 514. 5  | 0. 936291  | coding    |
| MSTRG. 515. 1  | 0. 067384  | coding    |
| MSTRG. 521. 1  | 0. 69446   | coding    |
| MSTRG. 521. 3  | 0. 391328  | coding    |
| MSTRG. 521. 4  | 0. 035521  | coding    |
| MSTRG. 521. 6  | -0. 062332 | noncoding |
| MSTRG. 521. 7  | -0. 147811 | noncoding |
| MSTRG. 526. 3  | 0. 989455  | coding    |
| MSTRG. 526. 1  | 1. 25446   | coding    |
| MSTRG. 526. 2  | 0. 720692  | coding    |

|                |            |           |
|----------------|------------|-----------|
| MSTRG. 527. 2  | -1. 00617  | noncoding |
| MSTRG. 533. 2  | -2. 33076  | noncoding |
| MSTRG. 533. 3  | 1. 03282   | coding    |
| MSTRG. 535. 1  | 0. 495203  | coding    |
| MSTRG. 535. 4  | 0. 039936  | coding    |
| MSTRG. 538. 1  | 1. 60855   | coding    |
| MSTRG. 538. 2  | 1. 73026   | coding    |
| MSTRG. 538. 3  | 1. 63175   | coding    |
| MSTRG. 538. 4  | 1. 74364   | coding    |
| MSTRG. 539. 1  | 0. 339391  | coding    |
| MSTRG. 570. 1  | 2. 26177   | coding    |
| MSTRG. 570. 15 | 1. 16958   | coding    |
| MSTRG. 570. 14 | 1. 53179   | coding    |
| MSTRG. 570. 16 | 0. 820487  | coding    |
| MSTRG. 570. 18 | 1. 48619   | coding    |
| MSTRG. 570. 17 | 1. 43161   | coding    |
| MSTRG. 570. 19 | 1. 64245   | coding    |
| MSTRG. 570. 20 | 1. 45599   | coding    |
| MSTRG. 570. 22 | 1. 14607   | coding    |
| MSTRG. 570. 21 | 1. 46669   | coding    |
| MSTRG. 570. 23 | 1. 57726   | coding    |
| MSTRG. 571. 1  | 0. 353842  | coding    |
| MSTRG. 572. 1  | -1. 27294  | noncoding |
| MSTRG. 570. 24 | -0. 273488 | noncoding |
| MSTRG. 573. 1  | -2. 14353  | noncoding |
| MSTRG. 574. 1  | -0. 787371 | noncoding |
| MSTRG. 575. 1  | -2. 55826  | noncoding |
| MSTRG. 576. 1  | -1. 08335  | noncoding |
| MSTRG. 577. 1  | 0. 050838  | coding    |
| MSTRG. 578. 1  | 0. 275684  | coding    |
| MSTRG. 570. 25 | -0. 193884 | noncoding |
| MSTRG. 579. 1  | 0. 223553  | coding    |
| MSTRG. 580. 1  | 1. 43039   | coding    |
| MSTRG. 581. 1  | 0. 133742  | coding    |
| MSTRG. 582. 1  | 0. 502565  | coding    |
| MSTRG. 583. 1  | -0. 755775 | noncoding |
| MSTRG. 584. 1  | -0. 748713 | noncoding |
| MSTRG. 546. 1  | 1. 76924   | coding    |
| MSTRG. 546. 2  | 1. 58587   | coding    |
| MSTRG. 547. 1  | 1. 16308   | coding    |
| MSTRG. 560. 4  | 0. 238652  | coding    |
| MSTRG. 560. 1  | 0. 270135  | coding    |
| MSTRG. 560. 6  | 0. 766502  | coding    |
| MSTRG. 561. 1  | -1. 99049  | noncoding |
| MSTRG. 562. 1  | -2. 10007  | noncoding |
| MSTRG. 564. 1  | -1. 54195  | noncoding |
| MSTRG. 601. 2  | 1. 25624   | coding    |
| MSTRG. 615. 6  | 1. 57696   | coding    |
| MSTRG. 615. 4  | 0. 993034  | coding    |
| MSTRG. 615. 5  | 1. 00484   | coding    |
| MSTRG. 616. 1  | -0. 738509 | noncoding |
| MSTRG. 617. 1  | -1. 76368  | noncoding |
| MSTRG. 622. 2  | 0. 878392  | coding    |
| MSTRG. 622. 3  | 0. 920123  | coding    |

|                |            |           |
|----------------|------------|-----------|
| MSTRG. 622. 4  | 0. 901071  | coding    |
| MSTRG. 623. 1  | -1. 14109  | noncoding |
| MSTRG. 624. 2  | 0. 935841  | coding    |
| MSTRG. 624. 3  | 0. 753874  | coding    |
| MSTRG. 625. 1  | -3. 23083  | noncoding |
| MSTRG. 627. 1  | 1. 02847   | coding    |
| MSTRG. 628. 1  | 1. 65063   | coding    |
| MSTRG. 628. 2  | 2. 45356   | coding    |
| MSTRG. 628. 3  | 1. 89362   | coding    |
| MSTRG. 628. 6  | 3. 04325   | coding    |
| MSTRG. 628. 5  | 2. 00609   | coding    |
| MSTRG. 639. 1  | 1. 53151   | coding    |
| MSTRG. 639. 2  | 1. 02924   | coding    |
| MSTRG. 645. 1  | -1. 2699   | noncoding |
| MSTRG. 646. 1  | 2. 13715   | coding    |
| MSTRG. 646. 3  | 1. 20114   | coding    |
| MSTRG. 646. 4  | 0. 97177   | coding    |
| MSTRG. 633. 4  | 0. 515954  | coding    |
| MSTRG. 633. 5  | 0. 324474  | coding    |
| MSTRG. 633. 6  | 0. 092462  | coding    |
| MSTRG. 633. 7  | 0. 056921  | coding    |
| MSTRG. 635. 1  | -2. 9502   | noncoding |
| MSTRG. 635. 2  | -2. 50744  | noncoding |
| MSTRG. 650. 1  | 2. 22198   | coding    |
| MSTRG. 665. 2  | 0. 252018  | coding    |
| MSTRG. 665. 3  | -0. 338907 | noncoding |
| MSTRG. 671. 6  | 3. 29029   | coding    |
| MSTRG. 671. 9  | 3. 16576   | coding    |
| MSTRG. 671. 10 | 2. 31004   | coding    |
| MSTRG. 671. 12 | 2. 29989   | coding    |
| MSTRG. 671. 15 | 2. 3806    | coding    |
| MSTRG. 671. 16 | 2. 37556   | coding    |
| MSTRG. 671. 18 | 0. 790107  | coding    |
| MSTRG. 672. 1  | -0. 185684 | noncoding |
| MSTRG. 667. 3  | 0. 75816   | coding    |
| MSTRG. 691. 1  | 1. 53216   | coding    |
| MSTRG. 691. 2  | 1. 5308    | coding    |
| MSTRG. 691. 5  | 0. 91635   | coding    |
| MSTRG. 691. 6  | 0. 915461  | coding    |
| MSTRG. 691. 3  | 2. 33263   | coding    |
| MSTRG. 691. 7  | -2. 73723  | noncoding |
| MSTRG. 691. 8  | 2. 47287   | coding    |
| MSTRG. 691. 9  | -0. 159959 | noncoding |
| MSTRG. 691. 10 | 2. 492     | coding    |
| MSTRG. 691. 11 | 1. 50206   | coding    |
| MSTRG. 691. 12 | -1. 78811  | noncoding |
| MSTRG. 693. 1  | -0. 660582 | noncoding |
| MSTRG. 694. 1  | -0. 480645 | noncoding |
| MSTRG. 691. 13 | 1. 78931   | coding    |
| MSTRG. 691. 14 | 1. 45595   | coding    |
| MSTRG. 691. 15 | 2. 23401   | coding    |
| MSTRG. 691. 17 | 0. 78361   | coding    |
| MSTRG. 691. 18 | 0. 376876  | coding    |
| MSTRG. 695. 1  | -1. 0327   | noncoding |

|                |            |           |
|----------------|------------|-----------|
| MSTRG. 691. 21 | -0. 833422 | noncoding |
| MSTRG. 691. 20 | 1. 22385   | coding    |
| MSTRG. 691. 22 | 1. 42324   | coding    |
| MSTRG. 696. 1  | 0. 240281  | coding    |
| MSTRG. 675. 2  | 1. 24447   | coding    |
| MSTRG. 681. 5  | 1. 30288   | coding    |
| MSTRG. 681. 4  | 0. 792939  | coding    |
| MSTRG. 684. 1  | 1. 34724   | coding    |
| MSTRG. 684. 4  | 1. 22603   | coding    |
| MSTRG. 699. 1  | 0. 748281  | coding    |
| MSTRG. 699. 3  | 1. 48598   | coding    |
| MSTRG. 699. 4  | 0. 770212  | coding    |
| MSTRG. 702. 1  | -0. 345746 | noncoding |
| MSTRG. 704. 4  | 0. 36904   | coding    |
| MSTRG. 704. 6  | 0. 120321  | coding    |
| MSTRG. 704. 7  | 0. 544058  | coding    |
| MSTRG. 685. 2  | 1. 43078   | coding    |
| MSTRG. 685. 1  | 1. 8961    | coding    |
| MSTRG. 685. 3  | 1. 77279   | coding    |
| MSTRG. 687. 5  | 1. 85349   | coding    |
| MSTRG. 687. 6  | 0. 210626  | coding    |
| MSTRG. 705. 6  | 0. 490373  | coding    |
| MSTRG. 705. 3  | 1. 3632    | coding    |
| MSTRG. 705. 4  | 0. 837383  | coding    |
| MSTRG. 705. 5  | 0. 952254  | coding    |
| MSTRG. 705. 1  | 0. 869207  | coding    |
| MSTRG. 705. 7  | 0. 837782  | coding    |
| MSTRG. 705. 8  | 0. 897382  | coding    |
| MSTRG. 706. 3  | 1. 23545   | coding    |
| MSTRG. 706. 4  | -0. 492212 | noncoding |
| MSTRG. 707. 1  | -1. 66416  | noncoding |
| MSTRG. 708. 1  | 0. 899934  | coding    |
| MSTRG. 708. 5  | 2. 06792   | coding    |
| MSTRG. 708. 4  | 1. 9214    | coding    |
| MSTRG. 708. 3  | 1. 80098   | coding    |
| MSTRG. 710. 3  | -0. 017192 | noncoding |
| MSTRG. 713. 3  | 1. 10218   | coding    |
| MSTRG. 714. 1  | 0. 749928  | coding    |
| MSTRG. 714. 2  | 2. 18374   | coding    |
| MSTRG. 715. 1  | -0. 048453 | noncoding |
| MSTRG. 717. 1  | -2. 065    | noncoding |
| MSTRG. 718. 1  | -1. 82103  | noncoding |
| MSTRG. 730. 7  | 2. 20569   | coding    |
| MSTRG. 731. 1  | -1. 76607  | noncoding |
| MSTRG. 732. 1  | -0. 038128 | noncoding |
| MSTRG. 733. 1  | -0. 665368 | noncoding |
| MSTRG. 727. 2  | 1. 47998   | coding    |
| MSTRG. 727. 3  | 1. 57181   | coding    |
| MSTRG. 727. 4  | 1. 79508   | coding    |
| MSTRG. 728. 1  | -0. 021427 | noncoding |
| MSTRG. 728. 2  | 0. 053911  | coding    |
| MSTRG. 728. 3  | 0. 238816  | coding    |
| MSTRG. 735. 1  | -0. 841465 | noncoding |
| MSTRG. 739. 1  | -0. 348441 | noncoding |



|               |            |           |
|---------------|------------|-----------|
| MSTRG. 740. 1 | 0. 372994  | coding    |
| MSTRG. 741. 1 | -0. 197254 | noncoding |
| MSTRG. 743. 2 | 0. 976871  | coding    |
| MSTRG. 752. 5 | -0. 636379 | noncoding |
| MSTRG. 752. 6 | -0. 633437 | noncoding |
| MSTRG. 755. 1 | -1. 70624  | noncoding |
| MSTRG. 756. 1 | -0. 701009 | noncoding |
| MSTRG. 758. 1 | -0. 124062 | noncoding |
| MSTRG. 774. 1 | 0. 352252  | coding    |
| MSTRG. 776. 1 | 0. 159978  | coding    |
| MSTRG. 777. 1 | -1. 66477  | noncoding |
| MSTRG. 770. 1 | -1. 8313   | noncoding |
| MSTRG. 771. 1 | -1. 45513  | noncoding |
| MSTRG. 771. 2 | -1. 93686  | noncoding |
| MSTRG. 778. 1 | -1. 5957   | noncoding |
| MSTRG. 782. 2 | 0. 831911  | coding    |
| MSTRG. 782. 3 | 1. 16269   | coding    |
| MSTRG. 782. 4 | 0. 677465  | coding    |
| MSTRG. 782. 5 | 1. 52802   | coding    |
| MSTRG. 784. 1 | -1. 38382  | noncoding |
| MSTRG. 784. 2 | -0. 495699 | noncoding |
| MSTRG. 786. 1 | 0. 193921  | coding    |
| MSTRG. 794. 2 | -0. 260115 | noncoding |
| MSTRG. 803. 3 | 1. 06096   | coding    |
| MSTRG. 804. 1 | -1. 19533  | noncoding |
| MSTRG. 804. 2 | -2. 39059  | noncoding |
| MSTRG. 805. 1 | -0. 81035  | noncoding |
| MSTRG. 806. 1 | 1. 34456   | coding    |
| MSTRG. 806. 4 | 0. 919859  | coding    |
| MSTRG. 801. 1 | -2. 16044  | noncoding |
| MSTRG. 813. 2 | 1. 78644   | coding    |
| MSTRG. 817. 1 | 1. 26792   | coding    |
| MSTRG. 831. 2 | 2. 62109   | coding    |
| MSTRG. 831. 4 | 3. 06024   | coding    |
| MSTRG. 833. 1 | -2. 34554  | noncoding |
| MSTRG. 835. 1 | 0. 552866  | coding    |
| MSTRG. 836. 2 | 2. 95476   | coding    |
| MSTRG. 837. 4 | 2. 52939   | coding    |
| MSTRG. 839. 2 | 0. 154752  | coding    |
| MSTRG. 840. 3 | 1. 628     | coding    |
| MSTRG. 840. 2 | 2. 11115   | coding    |
| MSTRG. 841. 3 | 1. 42645   | coding    |
| MSTRG. 841. 2 | 1. 29863   | coding    |
| MSTRG. 854. 3 | 1. 85737   | coding    |
| MSTRG. 855. 1 | 0. 684083  | coding    |
| MSTRG. 855. 2 | 0. 565796  | coding    |
| MSTRG. 848. 3 | 1. 75957   | coding    |
| MSTRG. 848. 5 | 1. 50343   | coding    |
| MSTRG. 848. 6 | 1. 85598   | coding    |
| MSTRG. 848. 8 | 2. 10647   | coding    |
| MSTRG. 859. 4 | 0. 73603   | coding    |
| MSTRG. 859. 6 | -2. 2428   | noncoding |
| MSTRG. 862. 2 | 2. 48709   | coding    |
| MSTRG. 862. 5 | 0. 153281  | coding    |

|                |            |           |
|----------------|------------|-----------|
| MSTRG. 862. 7  | 0. 357898  | coding    |
| MSTRG. 862. 6  | 2. 88512   | coding    |
| MSTRG. 862. 3  | 3. 16523   | coding    |
| MSTRG. 862. 8  | 2. 25732   | coding    |
| MSTRG. 874. 1  | -0. 465662 | noncoding |
| MSTRG. 892. 3  | 1. 60599   | coding    |
| MSTRG. 892. 2  | 1. 98749   | coding    |
| MSTRG. 892. 1  | 2. 14128   | coding    |
| MSTRG. 897. 2  | 0. 407851  | coding    |
| MSTRG. 914. 4  | 0. 792099  | coding    |
| MSTRG. 914. 3  | 0. 329088  | coding    |
| MSTRG. 914. 5  | 0. 665753  | coding    |
| MSTRG. 915. 2  | 2. 01229   | coding    |
| MSTRG. 915. 3  | 1. 94307   | coding    |
| MSTRG. 908. 1  | -2. 27793  | noncoding |
| MSTRG. 920. 1  | -0. 597937 | noncoding |
| MSTRG. 921. 1  | -1. 20989  | noncoding |
| MSTRG. 945. 1  | 1. 13763   | coding    |
| MSTRG. 934. 4  | 1. 00341   | coding    |
| MSTRG. 951. 3  | 1. 69642   | coding    |
| MSTRG. 952. 1  | -1. 91054  | noncoding |
| MSTRG. 956. 4  | 0. 314145  | coding    |
| MSTRG. 957. 1  | 0. 230111  | coding    |
| MSTRG. 959. 1  | -2. 00301  | noncoding |
| MSTRG. 965. 1  | -0. 553804 | noncoding |
| MSTRG. 965. 2  | -0. 267554 | noncoding |
| MSTRG. 965. 3  | -1. 85033  | noncoding |
| MSTRG. 979. 3  | 0. 586289  | coding    |
| MSTRG. 979. 7  | 0. 880606  | coding    |
| MSTRG. 980. 3  | -0. 772946 | noncoding |
| MSTRG. 981. 1  | -0. 271318 | noncoding |
| MSTRG. 980. 5  | 0. 324483  | coding    |
| MSTRG. 980. 6  | 0. 5855    | coding    |
| MSTRG. 980. 7  | 1. 39632   | coding    |
| MSTRG. 985. 1  | -0. 541734 | noncoding |
| MSTRG. 967. 2  | 1. 12731   | coding    |
| MSTRG. 972. 2  | 0. 454305  | coding    |
| MSTRG. 974. 1  | 2. 79453   | coding    |
| MSTRG. 975. 1  | 0. 200349  | coding    |
| MSTRG. 991. 1  | 1. 01722   | coding    |
| MSTRG. 991. 2  | 1. 04265   | coding    |
| MSTRG. 991. 3  | 0. 647331  | coding    |
| MSTRG. 994. 1  | 0. 20977   | coding    |
| MSTRG. 994. 2  | 0. 296685  | coding    |
| MSTRG. 994. 3  | 0. 588759  | coding    |
| MSTRG. 997. 1  | 1. 01878   | coding    |
| MSTRG. 1000. 1 | 1. 20816   | coding    |
| MSTRG. 1000. 2 | 0. 828614  | coding    |
| MSTRG. 1005. 5 | 0. 821924  | coding    |
| MSTRG. 1005. 6 | 2. 68696   | coding    |
| MSTRG. 1002. 3 | 0. 587507  | coding    |
| MSTRG. 1002. 4 | 0. 568282  | coding    |
| MSTRG. 1008. 4 | 0. 705132  | coding    |
| MSTRG. 1013. 4 | 1. 75895   | coding    |

|                 |            |           |
|-----------------|------------|-----------|
| MSTRG. 1013. 7  | 1. 24786   | coding    |
| MSTRG. 1013. 8  | 1. 2323    | coding    |
| MSTRG. 1013. 9  | 1. 36901   | coding    |
| MSTRG. 1012. 2  | 0. 090647  | coding    |
| MSTRG. 1012. 1  | -0. 427274 | noncoding |
| MSTRG. 1029. 1  | 2. 01757   | coding    |
| MSTRG. 1029. 3  | 1. 27975   | coding    |
| MSTRG. 1031. 1  | 1. 91507   | coding    |
| MSTRG. 1031. 2  | 1. 56884   | coding    |
| MSTRG. 1031. 3  | 0. 203722  | coding    |
| MSTRG. 1041. 2  | 1. 95716   | coding    |
| MSTRG. 1044. 3  | 2. 13433   | coding    |
| MSTRG. 1036. 3  | 2. 14651   | coding    |
| MSTRG. 1037. 1  | 0. 073674  | coding    |
| MSTRG. 1060. 2  | -0. 916475 | noncoding |
| MSTRG. 1063. 1  | 0. 56527   | coding    |
| MSTRG. 1063. 2  | 0. 613836  | coding    |
| MSTRG. 1066. 1  | 0. 686655  | coding    |
| MSTRG. 1066. 2  | 0. 744178  | coding    |
| MSTRG. 1066. 3  | -1. 00086  | noncoding |
| MSTRG. 1065. 1  | -2. 52177  | noncoding |
| MSTRG. 1070. 1  | -1. 14505  | noncoding |
| MSTRG. 1085. 2  | 0. 832254  | coding    |
| MSTRG. 1086. 2  | 0. 594186  | coding    |
| MSTRG. 1096. 1  | 1. 40451   | coding    |
| MSTRG. 1097. 1  | -0. 079633 | noncoding |
| MSTRG. 1096. 2  | 1. 29058   | coding    |
| MSTRG. 1108. 1  | -2. 65863  | noncoding |
| MSTRG. 1119. 1  | -0. 905173 | noncoding |
| MSTRG. 1132. 1  | 0. 52526   | coding    |
| MSTRG. 1125. 1  | 0. 230137  | coding    |
| MSTRG. 1141. 1  | -0. 331025 | noncoding |
| MSTRG. 1149. 1  | -0. 769584 | noncoding |
| MSTRG. 1150. 1  | -1. 53711  | noncoding |
| MSTRG. 1157. 6  | 1. 28497   | coding    |
| MSTRG. 1157. 7  | 0. 562276  | coding    |
| MSTRG. 1157. 8  | 1. 27631   | coding    |
| MSTRG. 1157. 10 | 0. 711357  | coding    |
| MSTRG. 1157. 9  | 0. 692592  | coding    |
| MSTRG. 1158. 1  | -0. 721942 | noncoding |
| MSTRG. 1158. 2  | -0. 228206 | noncoding |
| MSTRG. 1159. 1  | -0. 065887 | noncoding |
| MSTRG. 1173. 1  | -0. 11044  | noncoding |
| MSTRG. 1174. 1  | -1. 09491  | noncoding |
| MSTRG. 1175. 1  | 0. 839327  | coding    |
| MSTRG. 1161. 2  | 0. 641289  | coding    |
| MSTRG. 1161. 3  | -0. 130888 | noncoding |
| MSTRG. 1164. 2  | -0. 362428 | noncoding |
| MSTRG. 1167. 1  | -1. 814    | noncoding |
| MSTRG. 1184. 1  | -0. 498331 | noncoding |
| MSTRG. 1189. 2  | -0. 04496  | noncoding |
| MSTRG. 1190. 1  | -1. 32048  | noncoding |
| MSTRG. 1194. 2  | 0. 247013  | coding    |
| MSTRG. 1196. 2  | 0. 161753  | coding    |

|                 |           |           |
|-----------------|-----------|-----------|
| MSTRG. 1207. 1  | -1.43881  | noncoding |
| MSTRG. 1209. 1  | -2.08471  | noncoding |
| MSTRG. 1214. 2  | 0.313168  | coding    |
| MSTRG. 1215. 1  | -1.52496  | noncoding |
| MSTRG. 1211. 1  | -2.05384  | noncoding |
| MSTRG. 1236. 4  | 1.08634   | coding    |
| MSTRG. 1245. 2  | 2.55323   | coding    |
| MSTRG. 1250. 2  | -0.304754 | noncoding |
| MSTRG. 1251. 1  | -1.06212  | noncoding |
| MSTRG. 1252. 4  | 0.961225  | coding    |
| MSTRG. 1253. 1  | -1.70333  | noncoding |
| MSTRG. 1259. 2  | -0.515417 | noncoding |
| MSTRG. 1260. 1  | -1.67606  | noncoding |
| MSTRG. 1261. 2  | -0.888588 | noncoding |
| MSTRG. 1261. 5  | 0.814529  | coding    |
| MSTRG. 1261. 6  | 0.617425  | coding    |
| MSTRG. 1254. 1  | -1.02185  | noncoding |
| MSTRG. 1263. 1  | 2.21713   | coding    |
| MSTRG. 1267. 4  | 1.17309   | coding    |
| MSTRG. 1269. 1  | -1.41014  | noncoding |
| MSTRG. 1272. 1  | 2.09403   | coding    |
| MSTRG. 1272. 4  | 2.31067   | coding    |
| MSTRG. 1272. 6  | 2.13595   | coding    |
| MSTRG. 1272. 7  | 1.33395   | coding    |
| MSTRG. 1278. 2  | 0.858553  | coding    |
| MSTRG. 1278. 3  | -0.056862 | noncoding |
| MSTRG. 1279. 2  | 1.66305   | coding    |
| MSTRG. 1288. 3  | 3.29877   | coding    |
| MSTRG. 1288. 4  | 0.630854  | coding    |
| MSTRG. 1288. 5  | 0.900293  | coding    |
| MSTRG. 1285. 1  | -1.28861  | noncoding |
| MSTRG. 1309. 1  | -0.374711 | noncoding |
| MSTRG. 1310. 2  | -0.691938 | noncoding |
| MSTRG. 1310. 1  | -0.720016 | noncoding |
| MSTRG. 1310. 3  | -1.52496  | noncoding |
| MSTRG. 1311. 1  | 1.07869   | coding    |
| MSTRG. 1311. 7  | 1.42721   | coding    |
| MSTRG. 1311. 5  | 1.23849   | coding    |
| MSTRG. 1311. 6  | 1.48982   | coding    |
| MSTRG. 1311. 8  | 1.42124   | coding    |
| MSTRG. 1311. 9  | 1.35478   | coding    |
| MSTRG. 1311. 10 | 1.89605   | coding    |
| MSTRG. 1309. 2  | -0.582773 | noncoding |
| MSTRG. 1312. 1  | -0.614272 | noncoding |
| MSTRG. 1314. 2  | 1.63253   | coding    |
| MSTRG. 1317. 1  | -2.08922  | noncoding |
| MSTRG. 1318. 2  | 3.18925   | coding    |
| MSTRG. 1318. 3  | 3.03194   | coding    |
| MSTRG. 1319. 1  | 0.32939   | coding    |
| MSTRG. 1320. 1  | 1.41807   | coding    |
| MSTRG. 1321. 1  | -0.919888 | noncoding |
| MSTRG. 1323. 1  | -0.082651 | noncoding |
| MSTRG. 1318. 4  | 1.34397   | coding    |
| MSTRG. 1325. 1  | 1.21174   | coding    |

|                 |            |           |
|-----------------|------------|-----------|
| MSTRG. 1332. 2  | 1. 37941   | coding    |
| MSTRG. 1338. 1  | 0. 294413  | coding    |
| MSTRG. 1338. 2  | -0. 208022 | noncoding |
| MSTRG. 1338. 4  | 0. 536619  | coding    |
| MSTRG. 1338. 3  | 0. 509872  | coding    |
| MSTRG. 1338. 7  | 0. 371936  | coding    |
| MSTRG. 1338. 8  | 0. 670686  | coding    |
| MSTRG. 1339. 1  | -1. 2156   | noncoding |
| MSTRG. 1344. 2  | 0. 939435  | coding    |
| MSTRG. 1346. 1  | 0. 137314  | coding    |
| MSTRG. 1351. 5  | 2. 75983   | coding    |
| MSTRG. 1351. 6  | 2. 69092   | coding    |
| MSTRG. 1352. 6  | 1. 5365    | coding    |
| MSTRG. 1352. 2  | 0. 544037  | coding    |
| MSTRG. 1352. 4  | 0. 290516  | coding    |
| MSTRG. 1352. 9  | 0. 510755  | coding    |
| MSTRG. 1352. 11 | -0. 642627 | noncoding |
| MSTRG. 1352. 12 | -0. 667835 | noncoding |
| MSTRG. 1352. 10 | -0. 359975 | noncoding |
| MSTRG. 1352. 13 | -0. 907416 | noncoding |
| MSTRG. 1352. 14 | -0. 944057 | noncoding |
| MSTRG. 1352. 15 | 0. 014206  | coding    |
| MSTRG. 1355. 4  | 1. 91381   | coding    |
| MSTRG. 1363. 1  | -1. 11661  | noncoding |
| MSTRG. 1367. 2  | 0. 572143  | coding    |
| MSTRG. 1367. 3  | 0. 624197  | coding    |
| MSTRG. 1380. 9  | -0. 004224 | noncoding |
| MSTRG. 1380. 7  | 2. 55527   | coding    |
| MSTRG. 1380. 5  | 2. 59376   | coding    |
| MSTRG. 1380. 8  | 1. 65806   | coding    |
| MSTRG. 1380. 10 | 0. 949136  | coding    |
| MSTRG. 1380. 11 | -0. 538612 | noncoding |
| MSTRG. 1382. 1  | -1. 53253  | noncoding |
| MSTRG. 1384. 4  | 1. 31553   | coding    |
| MSTRG. 1384. 3  | 1. 99846   | coding    |
| MSTRG. 1384. 5  | -1. 1664   | noncoding |
| MSTRG. 1387. 1  | -0. 271379 | noncoding |
| MSTRG. 1391. 1  | 1. 10167   | coding    |
| MSTRG. 1395. 10 | 0. 579323  | coding    |
| MSTRG. 1395. 11 | 1. 01637   | coding    |
| MSTRG. 1395. 12 | 0. 801116  | coding    |
| MSTRG. 1395. 13 | 0. 955692  | coding    |
| MSTRG. 1395. 14 | 0. 865089  | coding    |
| MSTRG. 1395. 15 | 0. 965663  | coding    |
| MSTRG. 1395. 17 | 0. 6054    | coding    |
| MSTRG. 1395. 18 | 0. 8114    | coding    |
| MSTRG. 1395. 19 | 0. 775087  | coding    |
| MSTRG. 1395. 20 | 0. 811095  | coding    |
| MSTRG. 1395. 21 | 0. 993873  | coding    |
| MSTRG. 1395. 22 | 1. 20425   | coding    |
| MSTRG. 1395. 23 | 0. 741609  | coding    |
| MSTRG. 1395. 24 | 1. 21376   | coding    |
| MSTRG. 1396. 1  | 0. 626127  | coding    |
| MSTRG. 1396. 2  | 0. 456453  | coding    |

|                |            |           |
|----------------|------------|-----------|
| MSTRG. 1394. 1 | -2. 68868  | noncoding |
| MSTRG. 1398. 1 | 3. 20123   | coding    |
| MSTRG. 1398. 2 | 2. 03854   | coding    |
| MSTRG. 1407. 1 | -1. 68942  | noncoding |
| MSTRG. 1408. 1 | 0. 495622  | coding    |
| MSTRG. 1414. 3 | -1. 70894  | noncoding |
| MSTRG. 1415. 1 | 1. 31133   | coding    |
| MSTRG. 1415. 3 | 1. 17722   | coding    |
| MSTRG. 1416. 2 | 1. 27864   | coding    |
| MSTRG. 1419. 4 | 0. 277415  | coding    |
| MSTRG. 1419. 3 | 1. 12581   | coding    |
| MSTRG. 1420. 1 | -0. 353819 | noncoding |
| MSTRG. 1421. 1 | 0. 431086  | coding    |
| MSTRG. 1426. 2 | 1. 87346   | coding    |
| MSTRG. 1432. 3 | -0. 117956 | noncoding |
| MSTRG. 1432. 2 | 0. 568303  | coding    |
| MSTRG. 1433. 1 | -0. 325644 | noncoding |
| MSTRG. 1433. 5 | 1. 24507   | coding    |
| MSTRG. 1429. 2 | 0. 571538  | coding    |
| MSTRG. 1429. 3 | 0. 411873  | coding    |
| MSTRG. 1428. 1 | -1. 3115   | noncoding |
| MSTRG. 1436. 1 | 0. 840214  | coding    |
| MSTRG. 1436. 4 | 0. 883931  | coding    |
| MSTRG. 1436. 2 | 0. 886513  | coding    |
| MSTRG. 1436. 3 | 0. 858685  | coding    |
| MSTRG. 1437. 1 | -1. 56307  | noncoding |
| MSTRG. 1438. 1 | -0. 004428 | noncoding |
| MSTRG. 1436. 7 | 1. 20064   | coding    |
| MSTRG. 1436. 6 | 1. 21967   | coding    |
| MSTRG. 1439. 2 | 2. 13096   | coding    |
| MSTRG. 1440. 1 | -1. 56174  | noncoding |
| MSTRG. 1441. 1 | 0. 230153  | coding    |
| MSTRG. 1447. 1 | -1. 84573  | noncoding |
| MSTRG. 1449. 1 | -0. 165458 | noncoding |
| MSTRG. 1450. 1 | 0. 373446  | coding    |
| MSTRG. 1451. 2 | 0. 381681  | coding    |
| MSTRG. 1451. 3 | 0. 294668  | coding    |
| MSTRG. 1454. 5 | 0. 308045  | coding    |
| MSTRG. 1455. 2 | -1. 1972   | noncoding |
| MSTRG. 1455. 1 | -1. 20052  | noncoding |
| MSTRG. 1460. 1 | -1. 24987  | noncoding |
| MSTRG. 1463. 2 | 0. 929971  | coding    |
| MSTRG. 1464. 1 | -0. 794555 | noncoding |
| MSTRG. 1465. 2 | 1. 60139   | coding    |
| MSTRG. 1467. 2 | 1. 14718   | coding    |
| MSTRG. 1469. 1 | 2. 94371   | coding    |
| MSTRG. 1470. 1 | -0. 329547 | noncoding |
| MSTRG. 1475. 3 | -0. 629636 | noncoding |
| MSTRG. 1475. 2 | 0. 491629  | coding    |
| MSTRG. 1475. 4 | 0. 529637  | coding    |
| MSTRG. 1475. 5 | 0. 298902  | coding    |
| MSTRG. 1475. 6 | 0. 424949  | coding    |
| MSTRG. 1477. 1 | 0. 529145  | coding    |
| MSTRG. 1473. 1 | 2. 14745   | coding    |

|                 |            |           |
|-----------------|------------|-----------|
| MSTRG. 1473. 2  | 2. 18527   | coding    |
| MSTRG. 1494. 2  | 1. 52361   | coding    |
| MSTRG. 1495. 1  | -1. 70376  | noncoding |
| MSTRG. 1496. 1  | 2. 05463   | coding    |
| MSTRG. 1497. 1  | 1. 39511   | coding    |
| MSTRG. 1497. 2  | 1. 00689   | coding    |
| MSTRG. 1499. 1  | 0. 477212  | coding    |
| MSTRG. 1500. 3  | 0. 163552  | coding    |
| MSTRG. 1501. 5  | 1. 67973   | coding    |
| MSTRG. 1501. 1  | 1. 62381   | coding    |
| MSTRG. 1501. 2  | 1. 69655   | coding    |
| MSTRG. 1501. 3  | 1. 69024   | coding    |
| MSTRG. 1501. 4  | 1. 63682   | coding    |
| MSTRG. 1501. 6  | 1. 62281   | coding    |
| MSTRG. 1501. 9  | 1. 69327   | coding    |
| MSTRG. 1501. 10 | 1. 62006   | coding    |
| MSTRG. 1501. 11 | 1. 61013   | coding    |
| MSTRG. 1501. 14 | 1. 66205   | coding    |
| MSTRG. 1481. 1  | -1. 29907  | noncoding |
| MSTRG. 1483. 2  | 0. 781196  | coding    |
| MSTRG. 1484. 1  | -1. 30594  | noncoding |
| MSTRG. 1512. 6  | 0. 654393  | coding    |
| MSTRG. 1512. 5  | 0. 47873   | coding    |
| MSTRG. 1512. 7  | 0. 271982  | coding    |
| MSTRG. 1512. 10 | 0. 317585  | coding    |
| MSTRG. 1512. 8  | 0. 532591  | coding    |
| MSTRG. 1512. 9  | 0. 310355  | coding    |
| MSTRG. 1512. 11 | 0. 661093  | coding    |
| MSTRG. 1512. 12 | 0. 37009   | coding    |
| MSTRG. 1512. 13 | 0. 287751  | coding    |
| MSTRG. 1512. 14 | 0. 580099  | coding    |
| MSTRG. 1512. 15 | 0. 5079    | coding    |
| MSTRG. 1512. 16 | 0. 216015  | coding    |
| MSTRG. 1512. 17 | -0. 731453 | noncoding |
| MSTRG. 1512. 18 | 0. 110586  | coding    |
| MSTRG. 1512. 19 | 0. 345141  | coding    |
| MSTRG. 1514. 1  | -1. 08145  | noncoding |
| MSTRG. 1509. 3  | 2. 66445   | coding    |
| MSTRG. 1511. 2  | 0. 163996  | coding    |
| MSTRG. 1511. 3  | 0. 150935  | coding    |
| MSTRG. 1511. 5  | 0. 21063   | coding    |
| MSTRG. 1516. 1  | -0. 9636   | noncoding |
| MSTRG. 1518. 1  | -0. 764718 | noncoding |
| MSTRG. 1519. 1  | -0. 881909 | noncoding |
| MSTRG. 1520. 2  | 0. 595391  | coding    |
| MSTRG. 1535. 1  | 0. 199894  | coding    |
| MSTRG. 1536. 1  | -1. 71962  | noncoding |
| MSTRG. 1537. 4  | -0. 725007 | noncoding |
| MSTRG. 1538. 1  | 0. 892671  | coding    |
| MSTRG. 1538. 7  | 1. 82434   | coding    |
| MSTRG. 1538. 8  | 0. 382472  | coding    |
| MSTRG. 1538. 9  | 1. 79623   | coding    |
| MSTRG. 1538. 10 | 1. 28795   | coding    |
| MSTRG. 1538. 12 | 0. 628081  | coding    |

|                 |            |           |
|-----------------|------------|-----------|
| MSTRG. 1538. 13 | 0. 68117   | coding    |
| MSTRG. 1526. 2  | 0. 180214  | coding    |
| MSTRG. 1531. 6  | -0. 434054 | noncoding |
| MSTRG. 1531. 5  | 1. 23118   | coding    |
| MSTRG. 1531. 4  | 2. 29101   | coding    |
| MSTRG. 1531. 7  | 1. 63233   | coding    |
| MSTRG. 1532. 1  | -0. 021561 | noncoding |
| MSTRG. 1533. 1  | -0. 376891 | noncoding |
| MSTRG. 1531. 8  | 2. 05557   | coding    |
| MSTRG. 1531. 9  | 2. 04043   | coding    |
| MSTRG. 1534. 1  | -0. 010212 | noncoding |
| MSTRG. 1531. 10 | 1. 45584   | coding    |
| MSTRG. 1528. 1  | -1. 09999  | noncoding |
| MSTRG. 1528. 3  | -2. 07973  | noncoding |
| MSTRG. 1530. 1  | -0. 303176 | noncoding |
| MSTRG. 1544. 1  | 2. 24011   | coding    |
| MSTRG. 1544. 2  | 1. 78728   | coding    |
| MSTRG. 1545. 1  | -2. 30765  | noncoding |
| MSTRG. 1549. 1  | -1. 99346  | noncoding |
| MSTRG. 1550. 5  | 1. 02861   | coding    |
| MSTRG. 1550. 6  | 1. 42704   | coding    |
| MSTRG. 1550. 7  | 0. 097473  | coding    |
| MSTRG. 1554. 2  | 2. 37158   | coding    |
| MSTRG. 1555. 1  | -1. 39787  | noncoding |
| MSTRG. 1556. 1  | 0. 221989  | coding    |
| MSTRG. 1562. 3  | 0. 51413   | coding    |
| MSTRG. 1562. 4  | 0. 667035  | coding    |
| MSTRG. 1562. 5  | 0. 916161  | coding    |
| MSTRG. 1563. 1  | 0. 953414  | coding    |
| MSTRG. 1563. 3  | 0. 391569  | coding    |
| MSTRG. 1558. 2  | 0. 669982  | coding    |
| MSTRG. 1560. 1  | -0. 094179 | noncoding |
| MSTRG. 1576. 2  | 1. 1322    | coding    |
| MSTRG. 1578. 4  | 1. 0305    | coding    |
| MSTRG. 1578. 7  | 1. 31232   | coding    |
| MSTRG. 1578. 9  | -0. 482674 | noncoding |
| MSTRG. 1578. 11 | 0. 469137  | coding    |
| MSTRG. 1578. 10 | 0. 651419  | coding    |
| MSTRG. 1578. 12 | 0. 852764  | coding    |
| MSTRG. 1578. 13 | 1. 1511    | coding    |
| MSTRG. 1578. 14 | 0. 871486  | coding    |
| MSTRG. 1567. 3  | -0. 298278 | noncoding |
| MSTRG. 1567. 4  | -0. 387195 | noncoding |
| MSTRG. 1567. 5  | -0. 331137 | noncoding |
| MSTRG. 1567. 7  | -0. 016693 | noncoding |
| MSTRG. 1568. 2  | 1. 77281   | coding    |
| MSTRG. 1568. 4  | 1. 81165   | coding    |
| MSTRG. 1568. 6  | 1. 98117   | coding    |
| MSTRG. 1568. 5  | 1. 82542   | coding    |
| MSTRG. 1573. 1  | 0. 058994  | coding    |
| MSTRG. 1574. 2  | -0. 34013  | noncoding |
| MSTRG. 1574. 3  | 0. 410733  | coding    |
| MSTRG. 1589. 1  | -2. 3919   | noncoding |
| MSTRG. 1590. 1  | -1. 49011  | noncoding |



|                |           |           |
|----------------|-----------|-----------|
| MSTRG. 1592. 2 | -0.139679 | noncoding |
| MSTRG. 1592. 1 | 0.054074  | coding    |
| MSTRG. 1592. 4 | -0.614113 | noncoding |
| MSTRG. 1592. 5 | 0.04329   | coding    |
| MSTRG. 1592. 6 | 0.411376  | coding    |
| MSTRG. 1593. 1 | -0.83151  | noncoding |
| MSTRG. 1592. 7 | 0.876776  | coding    |
| MSTRG. 1592. 8 | -0.333679 | noncoding |
| MSTRG. 1594. 1 | 1.44266   | coding    |
| MSTRG. 1595. 1 | -1.00197  | noncoding |
| MSTRG. 1596. 1 | -1.0317   | noncoding |
| MSTRG. 1597. 1 | -1.58362  | noncoding |
| MSTRG. 1598. 1 | -0.746457 | noncoding |
| MSTRG. 1596. 2 | 0.966303  | coding    |
| MSTRG. 1583. 1 | -2.16436  | noncoding |
| MSTRG. 1583. 2 | -2.9131   | noncoding |
| MSTRG. 1585. 1 | -1.43585  | noncoding |
| MSTRG. 1600. 1 | -1.92693  | noncoding |
| MSTRG. 1603. 1 | 0.181755  | coding    |
| MSTRG. 1604. 1 | -2.35956  | noncoding |
| MSTRG. 1606. 1 | -2.06027  | noncoding |
| MSTRG. 1610. 1 | -0.081393 | noncoding |
| MSTRG. 1610. 3 | 0.511567  | coding    |
| MSTRG. 1610. 4 | 0.910595  | coding    |
| MSTRG. 1613. 3 | 0.477775  | coding    |
| MSTRG. 1614. 1 | -0.200215 | noncoding |
| MSTRG. 1614. 2 | -0.067636 | noncoding |
| MSTRG. 1614. 3 | -0.465363 | noncoding |
| MSTRG. 1614. 4 | 0.215289  | coding    |
| MSTRG. 1618. 1 | 2.31768   | coding    |
| MSTRG. 1618. 2 | -0.759513 | noncoding |
| MSTRG. 1618. 4 | -2.03176  | noncoding |
| MSTRG. 1618. 3 | 2.36698   | coding    |
| MSTRG. 1619. 1 | -1.43185  | noncoding |
| MSTRG. 1619. 2 | -1.16404  | noncoding |
| MSTRG. 1623. 2 | 0.904189  | coding    |
| MSTRG. 1637. 4 | -0.144593 | noncoding |
| MSTRG. 1637. 5 | 1.03706   | coding    |
| MSTRG. 1632. 1 | 0.377549  | coding    |
| MSTRG. 1632. 2 | 0.595899  | coding    |
| MSTRG. 1644. 3 | 1.79796   | coding    |
| MSTRG. 1642. 3 | 1.91494   | coding    |
| MSTRG. 1640. 1 | -1.96996  | noncoding |
| MSTRG. 1647. 3 | 0.704486  | coding    |
| MSTRG. 1650. 1 | 0.125146  | coding    |
| MSTRG. 1650. 2 | 0.13415   | coding    |
| MSTRG. 1650. 3 | 0.190468  | coding    |
| MSTRG. 1653. 1 | 0.962465  | coding    |
| MSTRG. 1654. 1 | 0.677285  | coding    |
| MSTRG. 1654. 2 | 0.678188  | coding    |
| MSTRG. 1654. 3 | 0.761325  | coding    |
| MSTRG. 1657. 1 | -0.221708 | noncoding |
| MSTRG. 1659. 1 | -2.15378  | noncoding |
| MSTRG. 1662. 1 | 2.09284   | coding    |

|                 |            |           |
|-----------------|------------|-----------|
| MSTRG. 1662. 4  | 2. 15139   | coding    |
| MSTRG. 1662. 7  | 2. 05676   | coding    |
| MSTRG. 1662. 9  | 2. 04286   | coding    |
| MSTRG. 1662. 10 | 2. 04811   | coding    |
| MSTRG. 1662. 12 | 2. 20482   | coding    |
| MSTRG. 1662. 13 | 1. 92053   | coding    |
| MSTRG. 1663. 1  | 1. 19413   | coding    |
| MSTRG. 1663. 5  | -1. 63332  | noncoding |
| MSTRG. 1663. 4  | 0. 774621  | coding    |
| MSTRG. 1663. 3  | 0. 423853  | coding    |
| MSTRG. 1665. 1  | 0. 586097  | coding    |
| MSTRG. 1667. 1  | -0. 930455 | noncoding |
| MSTRG. 1671. 1  | 1. 2887    | coding    |
| MSTRG. 1673. 5  | -0. 084498 | noncoding |
| MSTRG. 1673. 4  | 1. 31165   | coding    |
| MSTRG. 1673. 3  | 1. 90456   | coding    |
| MSTRG. 1675. 1  | 1. 35378   | coding    |
| MSTRG. 1676. 1  | -2. 30778  | noncoding |
| MSTRG. 1677. 1  | -2. 05935  | noncoding |
| MSTRG. 1678. 1  | -1. 98726  | noncoding |
| MSTRG. 1681. 1  | -0. 469726 | noncoding |
| MSTRG. 1685. 2  | -0. 090168 | noncoding |
| MSTRG. 1685. 3  | -0. 612696 | noncoding |
| MSTRG. 1689. 1  | -2. 31749  | noncoding |
| MSTRG. 1691. 1  | -0. 427548 | noncoding |
| MSTRG. 1692. 1  | -1. 15662  | noncoding |
| MSTRG. 1697. 2  | 0. 418973  | coding    |
| MSTRG. 1697. 1  | -1. 38625  | noncoding |
| MSTRG. 1697. 3  | 0. 922436  | coding    |
| MSTRG. 1697. 4  | -0. 246487 | noncoding |
| MSTRG. 1709. 2  | 2. 13781   | coding    |
| MSTRG. 1709. 4  | 2. 27603   | coding    |
| MSTRG. 1709. 6  | 2. 19633   | coding    |
| MSTRG. 1709. 8  | 1. 96805   | coding    |
| MSTRG. 1716. 2  | 0. 022149  | coding    |
| MSTRG. 1716. 1  | -0. 360795 | noncoding |
| MSTRG. 1716. 3  | 0. 360931  | coding    |
| MSTRG. 1717. 1  | 0. 357343  | coding    |
| MSTRG. 1725. 1  | 0. 007284  | coding    |
| MSTRG. 1726. 1  | -0. 102481 | noncoding |
| MSTRG. 1721. 1  | -2. 75598  | noncoding |
| MSTRG. 1721. 2  | -2. 34478  | noncoding |
| MSTRG. 1729. 2  | 2. 20781   | coding    |
| MSTRG. 1730. 1  | 0. 934804  | coding    |
| MSTRG. 1731. 1  | 0. 438952  | coding    |
| MSTRG. 1734. 1  | 0. 480795  | coding    |
| MSTRG. 1734. 2  | -1. 21231  | noncoding |
| MSTRG. 1727. 1  | 0. 086397  | coding    |
| MSTRG. 1727. 2  | -1. 09362  | noncoding |
| MSTRG. 1740. 3  | 1. 42789   | coding    |
| MSTRG. 1740. 2  | 1. 55176   | coding    |
| MSTRG. 1745. 1  | 1. 85229   | coding    |
| MSTRG. 1745. 3  | 1. 86673   | coding    |
| MSTRG. 1753. 1  | -2. 47582  | noncoding |

|                |            |           |
|----------------|------------|-----------|
| MSTRG. 1753. 2 | -1. 75251  | noncoding |
| MSTRG. 1768. 1 | -0. 286343 | noncoding |
| MSTRG. 1768. 2 | -0. 209518 | noncoding |
| MSTRG. 1768. 3 | -0. 120645 | noncoding |
| MSTRG. 1770. 2 | -0. 150913 | noncoding |
| MSTRG. 1772. 1 | 2. 46726   | coding    |
| MSTRG. 1772. 3 | 2. 68673   | coding    |
| MSTRG. 1772. 4 | 2. 79414   | coding    |
| MSTRG. 1773. 1 | -1. 69268  | noncoding |
| MSTRG. 1774. 1 | -2. 23287  | noncoding |
| MSTRG. 1777. 2 | 0. 562151  | coding    |
| MSTRG. 1777. 3 | 0. 581574  | coding    |
| MSTRG. 1782. 1 | 2. 96902   | coding    |
| MSTRG. 1782. 5 | 2. 12118   | coding    |
| MSTRG. 1782. 4 | 1. 95051   | coding    |
| MSTRG. 1783. 1 | -1. 32343  | noncoding |
| MSTRG. 1784. 1 | -0. 22578  | noncoding |
| MSTRG. 1787. 1 | -1. 00998  | noncoding |
| MSTRG. 1787. 2 | -0. 908015 | noncoding |
| MSTRG. 1779. 1 | -2. 14306  | noncoding |
| MSTRG. 1780. 1 | -0. 948681 | noncoding |
| MSTRG. 1791. 2 | 1. 14343   | coding    |
| MSTRG. 1791. 3 | 2. 07022   | coding    |
| MSTRG. 1798. 1 | -0. 165527 | noncoding |
| MSTRG. 1799. 1 | 0. 352982  | coding    |
| MSTRG. 1799. 2 | 1. 49575   | coding    |
| MSTRG. 1799. 3 | 0. 65637   | coding    |
| MSTRG. 1799. 4 | 1. 43345   | coding    |
| MSTRG. 1799. 7 | 0. 524168  | coding    |
| MSTRG. 1799. 6 | 1. 06232   | coding    |
| MSTRG. 1798. 2 | -0. 406529 | noncoding |
| MSTRG. 1798. 3 | 0. 247967  | coding    |
| MSTRG. 1799. 8 | 1. 61954   | coding    |
| MSTRG. 1805. 1 | 0. 415192  | coding    |
| MSTRG. 1805. 3 | 1. 0941    | coding    |
| MSTRG. 1801. 1 | -2. 03398  | noncoding |
| MSTRG. 1801. 2 | -1. 99419  | noncoding |
| MSTRG. 1801. 3 | -0. 948106 | noncoding |
| MSTRG. 1804. 1 | 0. 149947  | coding    |
| MSTRG. 1819. 1 | 2. 46364   | coding    |
| MSTRG. 1811. 3 | -0. 100429 | noncoding |
| MSTRG. 1814. 1 | 2. 05085   | coding    |
| MSTRG. 1814. 3 | 2. 12299   | coding    |
| MSTRG. 1814. 4 | 2. 24496   | coding    |
| MSTRG. 1814. 2 | 2. 23186   | coding    |
| MSTRG. 1814. 7 | 1. 95007   | coding    |
| MSTRG. 1814. 8 | -1. 09228  | noncoding |
| MSTRG. 1818. 1 | 2. 21969   | coding    |
| MSTRG. 1818. 3 | 2. 2333    | coding    |
| MSTRG. 1832. 1 | -0. 17295  | noncoding |
| MSTRG. 1832. 3 | 0. 78868   | coding    |
| MSTRG. 1833. 2 | 0. 761245  | coding    |
| MSTRG. 1833. 1 | 0. 179197  | coding    |
| MSTRG. 1833. 3 | -0. 871497 | noncoding |

|                 |           |           |
|-----------------|-----------|-----------|
| MSTRG. 1834. 1  | -1.11716  | noncoding |
| MSTRG. 1840. 1  | -0.047301 | noncoding |
| MSTRG. 1829. 1  | 0.599586  | coding    |
| MSTRG. 1841. 5  | -0.322239 | noncoding |
| MSTRG. 1847. 1  | 1.65562   | coding    |
| MSTRG. 1847. 2  | 2.03262   | coding    |
| MSTRG. 1869. 1  | -1.43151  | noncoding |
| MSTRG. 1868. 11 | 0.097858  | coding    |
| MSTRG. 1868. 12 | -1.55146  | noncoding |
| MSTRG. 1868. 13 | -1.43181  | noncoding |
| MSTRG. 1873. 1  | -1.15826  | noncoding |
| MSTRG. 1874. 1  | 0.199506  | coding    |
| MSTRG. 1874. 2  | -0.074393 | noncoding |
| MSTRG. 1849. 4  | 1.92033   | coding    |
| MSTRG. 1850. 1  | -0.809249 | noncoding |
| MSTRG. 1856. 4  | 1.35136   | coding    |
| MSTRG. 1857. 1  | 0.890819  | coding    |
| MSTRG. 1860. 1  | 1.16869   | coding    |
| MSTRG. 1860. 5  | 0.719999  | coding    |
| MSTRG. 1860. 6  | 2.13919   | coding    |
| MSTRG. 1860. 3  | 0.943677  | coding    |
| MSTRG. 1860. 4  | 1.13259   | coding    |
| MSTRG. 1862. 1  | -2.0911   | noncoding |
| MSTRG. 1860. 7  | 0.511989  | coding    |
| MSTRG. 1864. 1  | -0.931302 | noncoding |
| MSTRG. 1865. 1  | -0.190664 | noncoding |
| MSTRG. 1866. 1  | 0.264753  | coding    |
| MSTRG. 1867. 2  | 3.14724   | coding    |
| MSTRG. 1867. 3  | 3.21956   | coding    |
| MSTRG. 1891. 2  | 1.33513   | coding    |
| MSTRG. 1895. 2  | 1.37614   | coding    |
| MSTRG. 1895. 3  | -1.45506  | noncoding |
| MSTRG. 1895. 5  | 0.383321  | coding    |
| MSTRG. 1895. 4  | 1.13363   | coding    |
| MSTRG. 1900. 3  | 1.37523   | coding    |
| MSTRG. 1900. 4  | 1.08601   | coding    |
| MSTRG. 1900. 5  | 1.01172   | coding    |
| MSTRG. 1900. 6  | -1.0617   | noncoding |
| MSTRG. 1902. 4  | 2.31461   | coding    |
| MSTRG. 1906. 1  | -0.781463 | noncoding |
| MSTRG. 1907. 2  | 1.17208   | coding    |
| MSTRG. 1907. 3  | 1.28221   | coding    |
| MSTRG. 1907. 4  | 1.12659   | coding    |
| MSTRG. 1911. 1  | -1.53349  | noncoding |
| MSTRG. 1912. 2  | 0.680318  | coding    |
| MSTRG. 1912. 4  | -0.050715 | noncoding |
| MSTRG. 1912. 7  | 1.29663   | coding    |
| MSTRG. 1914. 1  | -1.40816  | noncoding |
| MSTRG. 1912. 8  | -1.13941  | noncoding |
| MSTRG. 1912. 9  | 0.755177  | coding    |
| MSTRG. 1909. 2  | 0.434055  | coding    |
| MSTRG. 1910. 1  | -1.70889  | noncoding |
| MSTRG. 1922. 1  | 0.145425  | coding    |
| MSTRG. 1922. 4  | 0.712303  | coding    |

|                 |            |           |
|-----------------|------------|-----------|
| MSTRG. 1922. 6  | 0. 685627  | coding    |
| MSTRG. 1922. 5  | 0. 102901  | coding    |
| MSTRG. 1923. 1  | -1. 94804  | noncoding |
| MSTRG. 1924. 1  | -0. 797943 | noncoding |
| MSTRG. 1924. 2  | -0. 896077 | noncoding |
| MSTRG. 1928. 3  | 1. 55722   | coding    |
| MSTRG. 1928. 5  | 1. 75688   | coding    |
| MSTRG. 1928. 7  | 1. 9013    | coding    |
| MSTRG. 1928. 8  | -0. 874194 | noncoding |
| MSTRG. 1928. 9  | 1. 51444   | coding    |
| MSTRG. 1928. 10 | 0. 582672  | coding    |
| MSTRG. 1930. 1  | 0. 105147  | coding    |
| MSTRG. 1928. 11 | -0. 426399 | noncoding |
| MSTRG. 1928. 12 | -0. 077736 | noncoding |
| MSTRG. 1928. 13 | -0. 063241 | noncoding |
| MSTRG. 1920. 4  | 2. 92373   | coding    |
| MSTRG. 1920. 5  | 2. 97374   | coding    |
| MSTRG. 1920. 6  | 0. 797919  | coding    |
| MSTRG. 1920. 7  | 3. 04062   | coding    |
| MSTRG. 1921. 1  | -0. 801788 | noncoding |
| MSTRG. 1918. 3  | 1. 82764   | coding    |
| MSTRG. 1940. 1  | 0. 084926  | coding    |
| MSTRG. 1940. 2  | 0. 374479  | coding    |
| MSTRG. 1940. 5  | 0. 163557  | coding    |
| MSTRG. 1940. 4  | 0. 07756   | coding    |
| MSTRG. 1941. 1  | 0. 327021  | coding    |
| MSTRG. 1943. 1  | 1. 62303   | coding    |
| MSTRG. 1943. 2  | 0. 947959  | coding    |
| MSTRG. 1943. 4  | 1. 05067   | coding    |
| MSTRG. 1945. 2  | 0. 784419  | coding    |
| MSTRG. 1948. 1  | -2. 39875  | noncoding |
| MSTRG. 1949. 1  | 0. 119965  | coding    |
| MSTRG. 1951. 1  | 2. 5393    | coding    |
| MSTRG. 1934. 1  | 2. 46373   | coding    |
| MSTRG. 1953. 1  | -0. 708678 | noncoding |
| MSTRG. 1954. 1  | -0. 064914 | noncoding |
| MSTRG. 1995. 1  | -0. 288222 | noncoding |
| MSTRG. 2012. 1  | 0. 156077  | coding    |
| MSTRG. 2013. 1  | -1. 41342  | noncoding |
| MSTRG. 2022. 1  | -0. 457682 | noncoding |
| MSTRG. 2023. 1  | -0. 305981 | noncoding |
| MSTRG. 2023. 2  | -0. 522156 | noncoding |
| MSTRG. 2025. 1  | -0. 947779 | noncoding |
| MSTRG. 2028. 1  | 0. 515562  | coding    |
| MSTRG. 1959. 1  | 2. 50252   | coding    |
| MSTRG. 1959. 3  | 2. 64294   | coding    |
| MSTRG. 1960. 1  | 2. 20252   | coding    |
| MSTRG. 1962. 1  | -1. 45019  | noncoding |
| MSTRG. 1962. 2  | -1. 2273   | noncoding |
| MSTRG. 1968. 3  | 0. 615308  | coding    |
| MSTRG. 1968. 8  | 0. 342038  | coding    |
| MSTRG. 1972. 2  | 1. 09973   | coding    |
| MSTRG. 1972. 6  | 0. 438685  | coding    |
| MSTRG. 1972. 4  | 0. 765103  | coding    |

|                 |           |           |
|-----------------|-----------|-----------|
| MSTRG. 1972. 3  | 0.834629  | coding    |
| MSTRG. 1972. 8  | 0.618753  | coding    |
| MSTRG. 1972. 10 | 0.401994  | coding    |
| MSTRG. 1972. 9  | 0.616331  | coding    |
| MSTRG. 1972. 11 | 0.346042  | coding    |
| MSTRG. 1970. 1  | -2.47353  | noncoding |
| MSTRG. 1989. 1  | -1.89895  | noncoding |
| MSTRG. 1989. 2  | -1.94979  | noncoding |
| MSTRG. 1990. 1  | -0.843945 | noncoding |
| MSTRG. 2059. 1  | -2.70176  | noncoding |
| MSTRG. 2062. 3  | 0.817441  | coding    |
| MSTRG. 2062. 4  | 0.655937  | coding    |
| MSTRG. 2062. 6  | 0.49992   | coding    |
| MSTRG. 2062. 5  | 0.604057  | coding    |
| MSTRG. 2063. 1  | 0.174878  | coding    |
| MSTRG. 2060. 1  | -1.95582  | noncoding |
| MSTRG. 2068. 4  | 1.11068   | coding    |
| MSTRG. 2068. 5  | 1.91067   | coding    |
| MSTRG. 2068. 6  | 1.66011   | coding    |
| MSTRG. 2068. 7  | 2.11881   | coding    |
| MSTRG. 2068. 9  | 2.09691   | coding    |
| MSTRG. 2068. 8  | 3.60914   | coding    |
| MSTRG. 2070. 1  | -2.63938  | noncoding |
| MSTRG. 2071. 1  | -0.819456 | noncoding |
| MSTRG. 2067. 1  | -2.24929  | noncoding |
| MSTRG. 2067. 2  | -1.52367  | noncoding |
| MSTRG. 2066. 1  | -1.65734  | noncoding |
| MSTRG. 2072. 2  | 1.50423   | coding    |
| MSTRG. 2079. 1  | 0.038554  | coding    |
| MSTRG. 2079. 2  | -1.52207  | noncoding |
| MSTRG. 2085. 1  | 0.17947   | coding    |
| MSTRG. 2085. 2  | -0.012505 | noncoding |
| MSTRG. 2086. 1  | -2.27747  | noncoding |
| MSTRG. 2088. 6  | 0.008047  | coding    |
| MSTRG. 2088. 4  | 1.51708   | coding    |
| MSTRG. 2088. 5  | 1.12954   | coding    |
| MSTRG. 2088. 8  | 1.50181   | coding    |
| MSTRG. 2083. 1  | -0.093    | noncoding |
| MSTRG. 2095. 1  | 0.734472  | coding    |
| MSTRG. 2095. 2  | -0.273915 | noncoding |
| MSTRG. 2098. 1  | -0.291888 | noncoding |
| MSTRG. 2097. 6  | 2.51824   | coding    |
| MSTRG. 2097. 7  | 2.22013   | coding    |
| MSTRG. 2097. 8  | 2.42955   | coding    |
| MSTRG. 2110. 8  | 1.80311   | coding    |
| MSTRG. 2110. 1  | 1.78973   | coding    |
| MSTRG. 2110. 5  | 1.80039   | coding    |
| MSTRG. 2111. 1  | 0.164665  | coding    |
| MSTRG. 2110. 9  | -1.39146  | noncoding |
| MSTRG. 2112. 1  | -0.790733 | noncoding |
| MSTRG. 2113. 1  | -0.306393 | noncoding |
| MSTRG. 2114. 1  | 1.27839   | coding    |
| MSTRG. 2116. 1  | -1.55485  | noncoding |
| MSTRG. 2114. 2  | 0.753562  | coding    |

|                 |            |           |
|-----------------|------------|-----------|
| MSTRG. 2108. 1  | -1. 72067  | noncoding |
| MSTRG. 2119. 3  | 1. 63703   | coding    |
| MSTRG. 2118. 1  | -1. 74983  | noncoding |
| MSTRG. 2126. 1  | -1. 45063  | noncoding |
| MSTRG. 2148. 1  | 0. 108312  | coding    |
| MSTRG. 2152. 1  | -1. 43904  | noncoding |
| MSTRG. 2154. 1  | -0. 642738 | noncoding |
| MSTRG. 2153. 6  | 0. 26302   | coding    |
| MSTRG. 2153. 3  | 0. 498065  | coding    |
| MSTRG. 2153. 5  | 0. 540381  | coding    |
| MSTRG. 2153. 4  | 0. 652727  | coding    |
| MSTRG. 2153. 7  | 1. 37633   | coding    |
| MSTRG. 2155. 1  | 3. 04522   | coding    |
| MSTRG. 2155. 2  | 2. 66184   | coding    |
| MSTRG. 2155. 3  | 2. 63937   | coding    |
| MSTRG. 2155. 4  | 2. 63736   | coding    |
| MSTRG. 2155. 7  | 0. 067409  | coding    |
| MSTRG. 2155. 8  | 0. 360209  | coding    |
| MSTRG. 2155. 9  | 1. 06313   | coding    |
| MSTRG. 2144. 1  | -0. 740578 | noncoding |
| MSTRG. 2145. 1  | -2. 43324  | noncoding |
| MSTRG. 2146. 1  | 1. 01613   | coding    |
| MSTRG. 2146. 2  | 0. 649528  | coding    |
| MSTRG. 2175. 1  | 2. 01153   | coding    |
| MSTRG. 2175. 2  | 1. 68409   | coding    |
| MSTRG. 2177. 2  | 1. 72635   | coding    |
| MSTRG. 2177. 1  | 1. 75408   | coding    |
| MSTRG. 2177. 6  | 1. 61923   | coding    |
| MSTRG. 2177. 4  | 1. 76042   | coding    |
| MSTRG. 2177. 7  | 1. 23569   | coding    |
| MSTRG. 2177. 8  | 1. 86699   | coding    |
| MSTRG. 2177. 10 | 1. 64269   | coding    |
| MSTRG. 2177. 12 | 0. 794292  | coding    |
| MSTRG. 2177. 11 | 1. 47135   | coding    |
| MSTRG. 2157. 1  | 1. 27157   | coding    |
| MSTRG. 2166. 1  | -1. 28836  | noncoding |
| MSTRG. 2167. 1  | -1. 39225  | noncoding |
| MSTRG. 2179. 2  | 2. 46957   | coding    |
| MSTRG. 2179. 3  | 2. 19244   | coding    |
| MSTRG. 2179. 4  | 1. 19899   | coding    |
| MSTRG. 2200. 2  | 1. 12042   | coding    |
| MSTRG. 2200. 3  | 1. 22736   | coding    |
| MSTRG. 2200. 5  | 0. 969373  | coding    |
| MSTRG. 2201. 1  | -0. 392142 | noncoding |
| MSTRG. 2202. 1  | -0. 338    | noncoding |
| MSTRG. 2203. 1  | 0. 787197  | coding    |
| MSTRG. 2210. 3  | 0. 752033  | coding    |
| MSTRG. 2211. 1  | 0. 246592  | coding    |
| MSTRG. 2210. 4  | 0. 114543  | coding    |
| MSTRG. 2212. 1  | 1. 51947   | coding    |
| MSTRG. 2213. 3  | 1. 11967   | coding    |
| MSTRG. 2196. 1  | -2. 5497   | noncoding |
| MSTRG. 2219. 1  | -0. 01522  | noncoding |
| MSTRG. 2220. 2  | 1. 38447   | coding    |

|                |            |           |
|----------------|------------|-----------|
| MSTRG. 2221. 1 | 0. 732128  | coding    |
| MSTRG. 2221. 2 | -0. 637765 | noncoding |
| MSTRG. 2222. 1 | 0. 236936  | coding    |
| MSTRG. 2222. 2 | -0. 028349 | noncoding |
| MSTRG. 2220. 3 | 1. 62339   | coding    |
| MSTRG. 2220. 4 | 0. 829685  | coding    |
| MSTRG. 2223. 3 | -0. 673784 | noncoding |
| MSTRG. 2223. 4 | 1. 3716    | coding    |
| MSTRG. 2223. 5 | 1. 2157    | coding    |
| MSTRG. 2223. 6 | 0. 308657  | coding    |
| MSTRG. 2224. 1 | -0. 065953 | noncoding |
| MSTRG. 2225. 1 | -0. 602053 | noncoding |
| MSTRG. 2230. 1 | -1. 50559  | noncoding |
| MSTRG. 2240. 1 | -2. 60305  | noncoding |
| MSTRG. 2241. 1 | -2. 2317   | noncoding |
| MSTRG. 2248. 2 | 1. 98116   | coding    |
| MSTRG. 2248. 4 | 2. 10882   | coding    |
| MSTRG. 2248. 6 | 1. 33175   | coding    |
| MSTRG. 2250. 1 | -1. 07816  | noncoding |
| MSTRG. 2252. 1 | 0. 338981  | coding    |
| MSTRG. 2257. 2 | 1. 3618    | coding    |
| MSTRG. 2257. 3 | 1. 55061   | coding    |
| MSTRG. 2265. 1 | 0. 034001  | coding    |
| MSTRG. 2265. 2 | -0. 321622 | noncoding |
| MSTRG. 2265. 3 | 0. 243754  | coding    |
| MSTRG. 2265. 4 | 0. 201339  | coding    |
| MSTRG. 2265. 6 | -0. 367207 | noncoding |
| MSTRG. 2265. 5 | 0. 11727   | coding    |
| MSTRG. 2262. 2 | 1. 45357   | coding    |
| MSTRG. 2268. 4 | 1. 11508   | coding    |
| MSTRG. 2268. 3 | 1. 52495   | coding    |
| MSTRG. 2268. 5 | 1. 44142   | coding    |
| MSTRG. 2269. 1 | -0. 125858 | noncoding |
| MSTRG. 2273. 1 | -1. 28406  | noncoding |
| MSTRG. 2278. 1 | -0. 336996 | noncoding |
| MSTRG. 2280. 1 | 1. 12062   | coding    |
| MSTRG. 2281. 1 | -0. 889139 | noncoding |
| MSTRG. 2282. 1 | -1. 77933  | noncoding |
| MSTRG. 2283. 1 | 1. 26499   | coding    |
| MSTRG. 2284. 1 | -0. 102079 | noncoding |
| MSTRG. 2270. 4 | 0. 045441  | coding    |
| MSTRG. 2270. 5 | 0. 055379  | coding    |
| MSTRG. 2288. 1 | 1. 30852   | coding    |
| MSTRG. 2288. 3 | 1. 07742   | coding    |
| MSTRG. 2289. 1 | 0. 73878   | coding    |
| MSTRG. 2285. 1 | -1. 95938  | noncoding |
| MSTRG. 2311. 1 | -2. 45984  | noncoding |
| MSTRG. 2350. 1 | 1. 16309   | coding    |
| MSTRG. 2352. 2 | 2. 28999   | coding    |
| MSTRG. 2352. 3 | 2. 35741   | coding    |
| MSTRG. 2352. 4 | 2. 2854    | coding    |
| MSTRG. 2355. 1 | -2. 28219  | noncoding |
| MSTRG. 2361. 1 | 2. 12777   | coding    |
| MSTRG. 2361. 2 | 2. 03053   | coding    |



|                 |            |           |
|-----------------|------------|-----------|
| MSTRG. 2361. 4  | 1. 75624   | coding    |
| MSTRG. 2361. 5  | 1. 30353   | coding    |
| MSTRG. 2361. 3  | 1. 29225   | coding    |
| MSTRG. 2362. 1  | -0. 112112 | noncoding |
| MSTRG. 2364. 1  | 1. 25917   | coding    |
| MSTRG. 2364. 4  | 0. 967333  | coding    |
| MSTRG. 2364. 6  | 0. 936509  | coding    |
| MSTRG. 2365. 1  | -1. 3507   | noncoding |
| MSTRG. 2364. 7  | 0. 527278  | coding    |
| MSTRG. 2364. 8  | -0. 241706 | noncoding |
| MSTRG. 2364. 9  | -1. 26848  | noncoding |
| MSTRG. 2366. 1  | -0. 524646 | noncoding |
| MSTRG. 2364. 11 | 0. 524556  | coding    |
| MSTRG. 2371. 1  | 1. 75574   | coding    |
| MSTRG. 2381. 1  | 2. 18593   | coding    |
| MSTRG. 2381. 10 | 2. 18249   | coding    |
| MSTRG. 2381. 7  | 2. 1488    | coding    |
| MSTRG. 2381. 4  | 1. 99068   | coding    |
| MSTRG. 2381. 6  | 2. 01666   | coding    |
| MSTRG. 2381. 5  | 2. 22076   | coding    |
| MSTRG. 2381. 2  | 2. 15514   | coding    |
| MSTRG. 2381. 3  | 2. 0982    | coding    |
| MSTRG. 2381. 9  | 2. 22581   | coding    |
| MSTRG. 2381. 13 | 2. 20941   | coding    |
| MSTRG. 2381. 12 | 2. 04001   | coding    |
| MSTRG. 2381. 15 | 2. 03005   | coding    |
| MSTRG. 2381. 17 | 1. 95578   | coding    |
| MSTRG. 2381. 16 | 1. 49795   | coding    |
| MSTRG. 2381. 14 | 2. 0867    | coding    |
| MSTRG. 2381. 18 | 2. 25386   | coding    |
| MSTRG. 2381. 19 | 1. 63015   | coding    |
| MSTRG. 2387. 1  | -2. 21597  | noncoding |
| MSTRG. 2385. 1  | -1. 28231  | noncoding |
| MSTRG. 2391. 1  | -2. 33113  | noncoding |
| MSTRG. 2392. 1  | -1. 6936   | noncoding |
| MSTRG. 2398. 5  | -0. 738216 | noncoding |
| MSTRG. 2412. 1  | -1. 16059  | noncoding |
| MSTRG. 2412. 2  | -0. 835942 | noncoding |
| MSTRG. 2412. 3  | 0. 492239  | coding    |
| MSTRG. 2415. 1  | -0. 286848 | noncoding |
| MSTRG. 2412. 4  | -0. 644758 | noncoding |
| MSTRG. 2417. 1  | -0. 174292 | noncoding |
| MSTRG. 2417. 2  | -0. 410292 | noncoding |
| MSTRG. 2418. 1  | -0. 284555 | noncoding |
| MSTRG. 2419. 2  | 2. 95024   | coding    |
| MSTRG. 2419. 5  | 0. 215466  | coding    |
| MSTRG. 2419. 6  | 2. 3659    | coding    |
| MSTRG. 2419. 4  | 2. 85225   | coding    |
| MSTRG. 2403. 1  | -0. 560829 | noncoding |
| MSTRG. 2407. 1  | -0. 050486 | noncoding |
| MSTRG. 2426. 1  | -1. 52915  | noncoding |
| MSTRG. 2431. 1  | -2. 57656  | noncoding |
| MSTRG. 2433. 1  | -1. 94012  | noncoding |
| MSTRG. 2438. 1  | -2. 19884  | noncoding |

|                 |            |           |
|-----------------|------------|-----------|
| MSTRG. 2439. 4  | 1. 20241   | coding    |
| MSTRG. 2435. 3  | 1. 09503   | coding    |
| MSTRG. 2446. 3  | 0. 942936  | coding    |
| MSTRG. 2447. 1  | 0. 595466  | coding    |
| MSTRG. 2475. 4  | 1. 44702   | coding    |
| MSTRG. 2475. 5  | 0. 497961  | coding    |
| MSTRG. 2476. 1  | -0. 688925 | noncoding |
| MSTRG. 2476. 2  | -0. 745466 | noncoding |
| MSTRG. 2477. 1  | -0. 732203 | noncoding |
| MSTRG. 2479. 4  | 1. 52089   | coding    |
| MSTRG. 2480. 1  | -0. 354749 | noncoding |
| MSTRG. 2479. 5  | 0. 688648  | coding    |
| MSTRG. 2479. 6  | 0. 736942  | coding    |
| MSTRG. 2479. 7  | 0. 552069  | coding    |
| MSTRG. 2479. 8  | 0. 600103  | coding    |
| MSTRG. 2479. 9  | 0. 808518  | coding    |
| MSTRG. 2479. 10 | 0. 667014  | coding    |
| MSTRG. 2479. 13 | 0. 775361  | coding    |
| MSTRG. 2479. 14 | 1. 02674   | coding    |
| MSTRG. 2479. 15 | 1. 46527   | coding    |
| MSTRG. 2479. 16 | 0. 520337  | coding    |
| MSTRG. 2479. 17 | 1. 03122   | coding    |
| MSTRG. 2485. 2  | 1. 80414   | coding    |
| MSTRG. 2485. 3  | 1. 72658   | coding    |
| MSTRG. 2460. 1  | 1. 65678   | coding    |
| MSTRG. 2464. 2  | 0. 249333  | coding    |
| MSTRG. 2468. 1  | 0. 695887  | coding    |
| MSTRG. 2489. 3  | 0. 633371  | coding    |
| MSTRG. 2492. 2  | 1. 47495   | coding    |
| MSTRG. 2493. 1  | 1. 66352   | coding    |
| MSTRG. 2498. 2  | 2. 50744   | coding    |
| MSTRG. 2509. 3  | 0. 829059  | coding    |
| MSTRG. 2509. 5  | 0. 390865  | coding    |
| MSTRG. 2509. 4  | 1. 33762   | coding    |
| MSTRG. 2510. 1  | -0. 099405 | noncoding |
| MSTRG. 2510. 2  | -0. 677302 | noncoding |
| MSTRG. 2513. 3  | 1. 22167   | coding    |
| MSTRG. 2513. 5  | 0. 749377  | coding    |
| MSTRG. 2514. 3  | -1. 43544  | noncoding |
| MSTRG. 2515. 1  | -0. 020083 | noncoding |
| MSTRG. 2499. 1  | -2. 85501  | noncoding |
| MSTRG. 2508. 1  | 1. 04362   | coding    |
| MSTRG. 2517. 2  | 1. 45874   | coding    |
| MSTRG. 2517. 3  | 1. 12895   | coding    |
| MSTRG. 2519. 3  | 1. 32714   | coding    |
| MSTRG. 2519. 4  | 1. 25677   | coding    |
| MSTRG. 2529. 1  | 1. 73898   | coding    |
| MSTRG. 2529. 2  | 0. 552054  | coding    |
| MSTRG. 2530. 1  | 0. 923229  | coding    |
| MSTRG. 2566. 1  | -2. 45442  | noncoding |
| MSTRG. 2567. 1  | -0. 842062 | noncoding |
| MSTRG. 2568. 2  | 1. 08929   | coding    |
| MSTRG. 2569. 1  | 1. 20245   | coding    |
| MSTRG. 2569. 2  | 1. 55163   | coding    |

|                 |            |           |
|-----------------|------------|-----------|
| MSTRG. 2569. 4  | 1. 66874   | coding    |
| MSTRG. 2569. 6  | -0. 249746 | noncoding |
| MSTRG. 2569. 5  | 0. 92996   | coding    |
| MSTRG. 2572. 1  | -1. 015    | noncoding |
| MSTRG. 2569. 7  | 2. 18263   | coding    |
| MSTRG. 2569. 8  | 2. 07713   | coding    |
| MSTRG. 2569. 9  | 2. 45741   | coding    |
| MSTRG. 2575. 1  | -0. 884633 | noncoding |
| MSTRG. 2576. 4  | -1. 14615  | noncoding |
| MSTRG. 2576. 3  | 1. 42901   | coding    |
| MSTRG. 2577. 1  | -0. 556349 | noncoding |
| MSTRG. 2576. 5  | 2. 05263   | coding    |
| MSTRG. 2576. 6  | 0. 348941  | coding    |
| MSTRG. 2576. 7  | 1. 00311   | coding    |
| MSTRG. 2579. 2  | 1. 84545   | coding    |
| MSTRG. 2579. 3  | 1. 12955   | coding    |
| MSTRG. 2541. 2  | 0. 612138  | coding    |
| MSTRG. 2542. 1  | -2. 24261  | noncoding |
| MSTRG. 2543. 1  | -1. 53768  | noncoding |
| MSTRG. 2544. 1  | -0. 651382 | noncoding |
| MSTRG. 2545. 1  | -1. 24144  | noncoding |
| MSTRG. 2536. 1  | -1. 13174  | noncoding |
| MSTRG. 2540. 1  | -1. 79027  | noncoding |
| MSTRG. 2561. 4  | 0. 739409  | coding    |
| MSTRG. 2564. 3  | 1. 55401   | coding    |
| MSTRG. 2582. 2  | 1. 13006   | coding    |
| MSTRG. 2582. 3  | 0. 963645  | coding    |
| MSTRG. 2588. 1  | -0. 86576  | noncoding |
| MSTRG. 2589. 2  | 1. 36491   | coding    |
| MSTRG. 2589. 3  | 0. 56826   | coding    |
| MSTRG. 2589. 4  | 0. 592862  | coding    |
| MSTRG. 2590. 2  | 0. 696214  | coding    |
| MSTRG. 2590. 1  | 0. 723296  | coding    |
| MSTRG. 2590. 3  | 0. 534706  | coding    |
| MSTRG. 2591. 5  | 0. 25484   | coding    |
| MSTRG. 2591. 6  | -1. 89245  | noncoding |
| MSTRG. 2594. 1  | 1. 65249   | coding    |
| MSTRG. 2596. 4  | 2. 36911   | coding    |
| MSTRG. 2596. 3  | 2. 48201   | coding    |
| MSTRG. 2597. 2  | -2. 19286  | noncoding |
| MSTRG. 2597. 1  | -2. 41881  | noncoding |
| MSTRG. 2598. 1  | -2. 08816  | noncoding |
| MSTRG. 2602. 1  | -1. 2448   | noncoding |
| MSTRG. 2602. 2  | -1. 92357  | noncoding |
| MSTRG. 2602. 3  | -1. 9492   | noncoding |
| MSTRG. 2602. 10 | 0. 176321  | coding    |
| MSTRG. 2602. 11 | 0. 196212  | coding    |
| MSTRG. 2602. 12 | -0. 718817 | noncoding |
| MSTRG. 2601. 1  | -2. 44298  | noncoding |
| MSTRG. 2601. 2  | -2. 76485  | noncoding |
| MSTRG. 2605. 3  | 0. 993748  | coding    |
| MSTRG. 2605. 4  | 0. 682518  | coding    |
| MSTRG. 2605. 5  | 1. 74913   | coding    |
| MSTRG. 2605. 6  | 0. 775077  | coding    |

|                 |            |           |
|-----------------|------------|-----------|
| MSTRG. 2605. 7  | 1. 99893   | coding    |
| MSTRG. 2605. 8  | 2. 43676   | coding    |
| MSTRG. 2605. 10 | 1. 79194   | coding    |
| MSTRG. 2605. 9  | 1. 82345   | coding    |
| MSTRG. 2605. 11 | 2. 27944   | coding    |
| MSTRG. 2609. 7  | 1. 59969   | coding    |
| MSTRG. 2609. 8  | 1. 56596   | coding    |
| MSTRG. 2609. 9  | 1. 68928   | coding    |
| MSTRG. 2610. 2  | -0. 119085 | noncoding |
| MSTRG. 2611. 1  | -0. 136812 | noncoding |
| MSTRG. 2607. 3  | 1. 01476   | coding    |
| MSTRG. 2682. 1  | 0. 231083  | coding    |
| MSTRG. 2614. 1  | -1. 93779  | noncoding |
| MSTRG. 2632. 1  | -0. 917415 | noncoding |
| MSTRG. 2633. 1  | -1. 62086  | noncoding |
| MSTRG. 2634. 3  | 0. 208969  | coding    |
| MSTRG. 2635. 1  | -1. 01667  | noncoding |
| MSTRG. 2636. 1  | -0. 858586 | noncoding |
| MSTRG. 2638. 1  | -2. 68973  | noncoding |
| MSTRG. 2639. 1  | 1. 28064   | coding    |
| MSTRG. 2640. 1  | 0. 600123  | coding    |
| MSTRG. 2641. 1  | -0. 446852 | noncoding |
| MSTRG. 2642. 1  | -1. 6455   | noncoding |
| MSTRG. 2645. 1  | -0. 388777 | noncoding |
| MSTRG. 2645. 2  | 0. 654929  | coding    |
| MSTRG. 2645. 3  | -1. 47236  | noncoding |
| MSTRG. 2647. 1  | -0. 863232 | noncoding |
| MSTRG. 2647. 2  | -1. 50314  | noncoding |
| MSTRG. 2649. 1  | -2. 29624  | noncoding |
| MSTRG. 2668. 3  | 2. 26246   | coding    |
| MSTRG. 2668. 4  | 2. 25346   | coding    |
| MSTRG. 2668. 5  | 2. 34856   | coding    |
| MSTRG. 2668. 6  | 1. 8626    | coding    |
| MSTRG. 2668. 7  | 1. 94186   | coding    |
| MSTRG. 2706. 2  | 1. 62629   | coding    |
| MSTRG. 2706. 3  | 1. 67949   | coding    |
| MSTRG. 2711. 3  | -1. 67176  | noncoding |
| MSTRG. 2711. 4  | -0. 455885 | noncoding |
| MSTRG. 2714. 3  | 0. 115553  | coding    |
| MSTRG. 2714. 4  | 0. 437001  | coding    |
| MSTRG. 2715. 1  | 2. 04744   | coding    |
| MSTRG. 2715. 4  | 1. 95174   | coding    |
| MSTRG. 2715. 5  | 1. 52303   | coding    |
| MSTRG. 2717. 2  | 1. 78112   | coding    |
| MSTRG. 2720. 1  | -1. 40484  | noncoding |
| MSTRG. 2721. 2  | 0. 755307  | coding    |
| MSTRG. 2721. 3  | 0. 400267  | coding    |
| MSTRG. 2724. 3  | 1. 5564    | coding    |
| MSTRG. 2740. 1  | 0. 783354  | coding    |
| MSTRG. 2742. 1  | 0. 12693   | coding    |
| MSTRG. 2742. 4  | 0. 455765  | coding    |
| MSTRG. 2742. 5  | 0. 437598  | coding    |
| MSTRG. 2730. 2  | 2. 1319    | coding    |
| MSTRG. 2732. 1  | 1. 37994   | coding    |

|                 |            |           |
|-----------------|------------|-----------|
| MSTRG. 2732. 2  | 1. 30374   | coding    |
| MSTRG. 2732. 5  | 1. 17644   | coding    |
| MSTRG. 2743. 1  | 1. 68909   | coding    |
| MSTRG. 2744. 1  | -1. 36339  | noncoding |
| MSTRG. 2747. 4  | 0. 264132  | coding    |
| MSTRG. 2750. 1  | -0. 702145 | noncoding |
| MSTRG. 2750. 2  | -1. 2254   | noncoding |
| MSTRG. 2750. 3  | -1. 24398  | noncoding |
| MSTRG. 2749. 5  | 1. 70966   | coding    |
| MSTRG. 2757. 1  | -2. 37883  | noncoding |
| MSTRG. 2761. 1  | -2. 25284  | noncoding |
| MSTRG. 2762. 1  | -2. 6265   | noncoding |
| MSTRG. 2766. 2  | 1. 04336   | coding    |
| MSTRG. 2770. 1  | -2. 84841  | noncoding |
| MSTRG. 2771. 3  | -0. 759007 | noncoding |
| MSTRG. 2771. 2  | -0. 784664 | noncoding |
| MSTRG. 2772. 1  | 1. 06379   | coding    |
| MSTRG. 2774. 2  | 3. 19602   | coding    |
| MSTRG. 2774. 3  | 2. 15948   | coding    |
| MSTRG. 2775. 1  | 0. 451357  | coding    |
| MSTRG. 2777. 3  | 1. 79738   | coding    |
| MSTRG. 2778. 1  | -0. 984315 | noncoding |
| MSTRG. 2778. 2  | -1. 7707   | noncoding |
| MSTRG. 2804. 3  | -0. 351168 | noncoding |
| MSTRG. 2806. 5  | 0. 599536  | coding    |
| MSTRG. 2806. 6  | 0. 378039  | coding    |
| MSTRG. 2806. 7  | 0. 297972  | coding    |
| MSTRG. 2806. 8  | -2. 13185  | noncoding |
| MSTRG. 2807. 1  | -0. 388992 | noncoding |
| MSTRG. 2808. 1  | -0. 315431 | noncoding |
| MSTRG. 2809. 1  | 0. 996067  | coding    |
| MSTRG. 2810. 2  | 1. 1954    | coding    |
| MSTRG. 2811. 8  | 1. 37776   | coding    |
| MSTRG. 2811. 10 | 0. 534692  | coding    |
| MSTRG. 2788. 4  | 2. 22037   | coding    |
| MSTRG. 2788. 5  | 2. 32861   | coding    |
| MSTRG. 2788. 6  | 1. 63191   | coding    |
| MSTRG. 2788. 7  | 1. 56687   | coding    |
| MSTRG. 2793. 3  | 0. 80211   | coding    |
| MSTRG. 2798. 2  | 2. 11751   | coding    |
| MSTRG. 2822. 10 | 2. 60994   | coding    |
| MSTRG. 2822. 6  | 2. 20596   | coding    |
| MSTRG. 2829. 1  | 1. 07604   | coding    |
| MSTRG. 2830. 1  | -1. 43118  | noncoding |
| MSTRG. 2799. 1  | 1. 04743   | coding    |
| MSTRG. 2800. 2  | 0. 737059  | coding    |
| MSTRG. 2817. 1  | 1. 81166   | coding    |
| MSTRG. 2819. 1  | -1. 23759  | noncoding |
| MSTRG. 2819. 2  | -1. 24202  | noncoding |
| MSTRG. 2819. 3  | -1. 62841  | noncoding |
| MSTRG. 2819. 4  | -0. 230658 | noncoding |
| MSTRG. 2820. 2  | 0. 174257  | coding    |
| MSTRG. 2820. 3  | 3. 80647   | coding    |
| MSTRG. 2816. 4  | 0. 616645  | coding    |

|                |            |           |
|----------------|------------|-----------|
| MSTRG. 2816. 3 | 0. 768192  | coding    |
| MSTRG. 2816. 1 | 0. 79706   | coding    |
| MSTRG. 2816. 5 | -0. 038527 | noncoding |
| MSTRG. 2814. 1 | -2. 48717  | noncoding |
| MSTRG. 2821. 2 | 2. 61218   | coding    |
| MSTRG. 2821. 3 | 2. 39679   | coding    |
| MSTRG. 2833. 3 | 1. 45721   | coding    |
| MSTRG. 2833. 4 | 0. 033929  | coding    |
| MSTRG. 2833. 5 | 0. 49158   | coding    |
| MSTRG. 2836. 2 | 3. 03774   | coding    |
| MSTRG. 2837. 1 | 0. 544682  | coding    |
| MSTRG. 2837. 2 | 0. 548552  | coding    |
| MSTRG. 2843. 2 | 2. 02452   | coding    |
| MSTRG. 2840. 3 | 0. 614219  | coding    |
| MSTRG. 2848. 2 | 2. 72626   | coding    |
| MSTRG. 2848. 3 | 2. 82219   | coding    |
| MSTRG. 2848. 4 | 1. 30541   | coding    |
| MSTRG. 2848. 6 | 2. 44461   | coding    |
| MSTRG. 2848. 7 | -1. 82282  | noncoding |
| MSTRG. 2845. 1 | -0. 756897 | noncoding |
| MSTRG. 2845. 2 | -1. 11309  | noncoding |
| MSTRG. 2850. 5 | -0. 226619 | noncoding |
| MSTRG. 2850. 4 | 0. 421845  | coding    |
| MSTRG. 2850. 6 | -0. 798227 | noncoding |
| MSTRG. 2850. 7 | 0. 115278  | coding    |
| MSTRG. 2850. 8 | 0. 622238  | coding    |
| MSTRG. 2846. 1 | -1. 12154  | noncoding |
| MSTRG. 2857. 2 | 1. 1943    | coding    |
| MSTRG. 2857. 4 | 1. 28707   | coding    |
| MSTRG. 2852. 4 | 0. 475967  | coding    |
| MSTRG. 2852. 3 | 0. 470297  | coding    |
| MSTRG. 2858. 2 | 1. 44604   | coding    |
| MSTRG. 2859. 1 | -2. 51638  | noncoding |
| MSTRG. 2865. 3 | 1. 95262   | coding    |
| MSTRG. 2866. 8 | 1. 38342   | coding    |
| MSTRG. 2871. 1 | 0. 401521  | coding    |
| MSTRG. 2873. 1 | 1. 82569   | coding    |
| MSTRG. 2870. 1 | 0. 575481  | coding    |
| MSTRG. 2879. 1 | 0. 928565  | coding    |
| MSTRG. 2879. 3 | 1. 153     | coding    |
| MSTRG. 2884. 3 | 2. 14159   | coding    |
| MSTRG. 2889. 3 | 0. 043     | coding    |
| MSTRG. 2889. 4 | -0. 632207 | noncoding |
| MSTRG. 2894. 2 | -1. 65558  | noncoding |
| MSTRG. 2897. 1 | 1. 41476   | coding    |
| MSTRG. 2898. 2 | 0. 800998  | coding    |
| MSTRG. 2898. 1 | 0. 777942  | coding    |
| MSTRG. 2899. 1 | -0. 298002 | noncoding |
| MSTRG. 2899. 3 | 0. 157523  | coding    |
| MSTRG. 2899. 2 | 0. 004018  | coding    |
| MSTRG. 2898. 4 | 0. 766933  | coding    |
| MSTRG. 2900. 4 | 1. 37352   | coding    |
| MSTRG. 2900. 5 | -0. 622623 | noncoding |
| MSTRG. 2906. 4 | 1. 12091   | coding    |

|                |            |           |
|----------------|------------|-----------|
| MSTRG. 2906. 5 | 0. 808081  | coding    |
| MSTRG. 2907. 3 | 1. 94099   | coding    |
| MSTRG. 2909. 1 | -0. 946762 | noncoding |
| MSTRG. 2909. 2 | -0. 322492 | noncoding |
| MSTRG. 2910. 1 | -0. 270833 | noncoding |
| MSTRG. 2910. 4 | -0. 690453 | noncoding |
| MSTRG. 2912. 2 | 1. 54451   | coding    |
| MSTRG. 2913. 1 | -1. 27277  | noncoding |
| MSTRG. 2914. 1 | 0. 670698  | coding    |
| MSTRG. 2914. 2 | 0. 843918  | coding    |
| MSTRG. 2921. 1 | -0. 558429 | noncoding |
| MSTRG. 2922. 1 | -2. 2192   | noncoding |
| MSTRG. 2922. 2 | -1. 72176  | noncoding |
| MSTRG. 2920. 1 | -1. 97016  | noncoding |
| MSTRG. 2924. 2 | 2. 69102   | coding    |
| MSTRG. 2924. 3 | 2. 80482   | coding    |
| MSTRG. 2927. 3 | 1. 66418   | coding    |
| MSTRG. 2932. 2 | 1. 40994   | coding    |
| MSTRG. 2932. 6 | 0. 899537  | coding    |
| MSTRG. 2929. 1 | -1. 28765  | noncoding |
| MSTRG. 2935. 3 | 0. 811807  | coding    |
| MSTRG. 2943. 3 | 0. 594759  | coding    |
| MSTRG. 2943. 4 | 0. 518226  | coding    |
| MSTRG. 2943. 5 | 0. 769696  | coding    |
| MSTRG. 2943. 7 | 0. 72154   | coding    |
| MSTRG. 2943. 6 | 0. 197758  | coding    |
| MSTRG. 2950. 1 | 1. 12609   | coding    |
| MSTRG. 2950. 2 | 1. 27168   | coding    |
| MSTRG. 2950. 3 | 1. 36586   | coding    |
| MSTRG. 2951. 1 | -0. 620497 | noncoding |
| MSTRG. 2956. 4 | 1. 53175   | coding    |
| MSTRG. 2956. 5 | 1. 66472   | coding    |
| MSTRG. 2956. 6 | 1. 39877   | coding    |
| MSTRG. 2956. 7 | 1. 22478   | coding    |
| MSTRG. 2957. 1 | 0. 048781  | coding    |
| MSTRG. 2948. 3 | 1. 81101   | coding    |
| MSTRG. 2960. 1 | -0. 825577 | noncoding |
| MSTRG. 2968. 1 | 1. 83487   | coding    |
| MSTRG. 2968. 2 | 1. 88662   | coding    |
| MSTRG. 2968. 3 | 2. 08668   | coding    |
| MSTRG. 2973. 1 | -0. 177158 | noncoding |
| MSTRG. 2978. 3 | 1. 94091   | coding    |
| MSTRG. 2978. 1 | 1. 59046   | coding    |
| MSTRG. 2978. 2 | 2. 08006   | coding    |
| MSTRG. 2979. 1 | -2. 6748   | noncoding |
| MSTRG. 2980. 1 | 0. 429035  | coding    |
| MSTRG. 2983. 1 | 0. 556693  | coding    |
| MSTRG. 2995. 1 | 1. 86189   | coding    |
| MSTRG. 2996. 3 | -0. 520043 | noncoding |
| MSTRG. 2996. 4 | -0. 450099 | noncoding |
| MSTRG. 3004. 4 | 1. 19581   | coding    |
| MSTRG. 3004. 6 | 1. 41477   | coding    |
| MSTRG. 3004. 7 | 1. 19976   | coding    |
| MSTRG. 3001. 1 | 1. 54396   | coding    |

|                 |            |           |
|-----------------|------------|-----------|
| MSTRG. 3012. 4  | 2. 4149    | coding    |
| MSTRG. 3012. 5  | 2. 62044   | coding    |
| MSTRG. 3012. 6  | 2. 27819   | coding    |
| MSTRG. 3017. 3  | 1. 01198   | coding    |
| MSTRG. 3017. 7  | 0. 170898  | coding    |
| MSTRG. 3014. 2  | 2. 20282   | coding    |
| MSTRG. 3021. 2  | 1. 72303   | coding    |
| MSTRG. 3026. 1  | -2. 15148  | noncoding |
| MSTRG. 3027. 2  | 1. 56131   | coding    |
| MSTRG. 3027. 3  | 1. 91917   | coding    |
| MSTRG. 3027. 4  | -0. 128346 | noncoding |
| MSTRG. 3028. 1  | 1. 64529   | coding    |
| MSTRG. 3028. 2  | 1. 82957   | coding    |
| MSTRG. 3028. 3  | 1. 58797   | coding    |
| MSTRG. 3028. 4  | 1. 53475   | coding    |
| MSTRG. 3028. 5  | 0. 341001  | coding    |
| MSTRG. 3029. 1  | -1. 09609  | noncoding |
| MSTRG. 3031. 6  | 0. 784924  | coding    |
| MSTRG. 3031. 10 | 0. 743389  | coding    |
| MSTRG. 3031. 7  | 0. 760576  | coding    |
| MSTRG. 3031. 9  | 0. 723797  | coding    |
| MSTRG. 3036. 2  | 1. 2444    | coding    |
| MSTRG. 3037. 1  | 1. 51195   | coding    |
| MSTRG. 3037. 5  | 1. 89927   | coding    |
| MSTRG. 3037. 6  | 1. 5192    | coding    |
| MSTRG. 3039. 3  | 0. 507079  | coding    |
| MSTRG. 3043. 1  | 1. 49047   | coding    |
| MSTRG. 3043. 7  | 1. 31326   | coding    |
| MSTRG. 3043. 4  | 2. 14097   | coding    |
| MSTRG. 3043. 6  | 2. 14356   | coding    |
| MSTRG. 3043. 3  | 1. 42264   | coding    |
| MSTRG. 3043. 10 | 0. 843943  | coding    |
| MSTRG. 3043. 11 | 0. 854456  | coding    |
| MSTRG. 3043. 12 | 1. 16426   | coding    |
| MSTRG. 3043. 9  | 2. 03907   | coding    |
| MSTRG. 3043. 13 | 0. 657541  | coding    |
| MSTRG. 3042. 1  | -0. 42888  | noncoding |
| MSTRG. 3050. 1  | -2. 08998  | noncoding |
| MSTRG. 3054. 2  | 0. 407504  | coding    |
| MSTRG. 3055. 2  | 1. 0975    | coding    |
| MSTRG. 3044. 2  | 1. 99469   | coding    |
| MSTRG. 3056. 2  | 0. 379114  | coding    |
| MSTRG. 3059. 1  | 1. 47477   | coding    |
| MSTRG. 3060. 1  | 1. 08824   | coding    |
| MSTRG. 3061. 1  | -1. 0632   | noncoding |
| MSTRG. 3061. 2  | -0. 784515 | noncoding |
| MSTRG. 3064. 6  | 1. 65221   | coding    |
| MSTRG. 3064. 5  | 0. 911377  | coding    |
| MSTRG. 3066. 1  | -0. 777366 | noncoding |
| MSTRG. 3068. 4  | 0. 846831  | coding    |
| MSTRG. 3068. 5  | 1. 07018   | coding    |
| MSTRG. 3068. 3  | 1. 39711   | coding    |
| MSTRG. 3065. 1  | -1. 78494  | noncoding |
| MSTRG. 3070. 1  | 0. 388168  | coding    |



|                 |            |           |
|-----------------|------------|-----------|
| MSTRG. 3076. 1  | 1. 53791   | coding    |
| MSTRG. 3085. 2  | 1. 54277   | coding    |
| MSTRG. 3087. 2  | -1. 70543  | noncoding |
| MSTRG. 3087. 1  | -1. 56406  | noncoding |
| MSTRG. 3093. 1  | -1. 36466  | noncoding |
| MSTRG. 3092. 4  | 1. 3449    | coding    |
| MSTRG. 3092. 5  | -0. 317794 | noncoding |
| MSTRG. 3088. 2  | 1. 6737    | coding    |
| MSTRG. 3088. 3  | 1. 42937   | coding    |
| MSTRG. 3113. 1  | 0. 484695  | coding    |
| MSTRG. 3114. 1  | 2. 33419   | coding    |
| MSTRG. 3115. 1  | 0. 995886  | coding    |
| MSTRG. 3116. 1  | 0. 581526  | coding    |
| MSTRG. 3116. 2  | 0. 525884  | coding    |
| MSTRG. 3114. 2  | 2. 84012   | coding    |
| MSTRG. 3114. 4  | 2. 89453   | coding    |
| MSTRG. 3114. 3  | 2. 85622   | coding    |
| MSTRG. 3114. 5  | 2. 81811   | coding    |
| MSTRG. 3114. 7  | 2. 59586   | coding    |
| MSTRG. 3114. 13 | 2. 79426   | coding    |
| MSTRG. 3114. 8  | 2. 86967   | coding    |
| MSTRG. 3114. 9  | 2. 75526   | coding    |
| MSTRG. 3117. 1  | 0. 430014  | coding    |
| MSTRG. 3118. 1  | 0. 612677  | coding    |
| MSTRG. 3114. 14 | 2. 78165   | coding    |
| MSTRG. 3114. 15 | 2. 90854   | coding    |
| MSTRG. 3122. 1  | -2. 38867  | noncoding |
| MSTRG. 3124. 3  | 1. 47513   | coding    |
| MSTRG. 3124. 4  | 1. 34748   | coding    |
| MSTRG. 3124. 5  | 1. 22955   | coding    |
| MSTRG. 3124. 8  | 0. 641633  | coding    |
| MSTRG. 3100. 1  | -0. 374214 | noncoding |
| MSTRG. 3101. 1  | 2. 67348   | coding    |
| MSTRG. 3101. 3  | 2. 68875   | coding    |
| MSTRG. 3101. 2  | 2. 54308   | coding    |
| MSTRG. 3101. 4  | 2. 70949   | coding    |
| MSTRG. 3101. 5  | 1. 05956   | coding    |
| MSTRG. 3104. 1  | -1. 19497  | noncoding |
| MSTRG. 3101. 6  | 2. 02974   | coding    |
| MSTRG. 3096. 2  | 0. 796934  | coding    |
| MSTRG. 3106. 3  | 2. 46285   | coding    |
| MSTRG. 3106. 4  | 2. 54853   | coding    |
| MSTRG. 3106. 5  | 2. 58126   | coding    |
| MSTRG. 3106. 6  | 2. 58898   | coding    |
| MSTRG. 3106. 7  | 2. 345     | coding    |
| MSTRG. 3106. 8  | -2. 07034  | noncoding |
| MSTRG. 3109. 1  | -0. 031634 | noncoding |
| MSTRG. 3111. 1  | -1. 67055  | noncoding |
| MSTRG. 3125. 3  | -0. 200482 | noncoding |
| MSTRG. 3126. 2  | -1. 78185  | noncoding |
| MSTRG. 3127. 3  | 1. 02799   | coding    |
| MSTRG. 3127. 4  | 0. 996734  | coding    |
| MSTRG. 3130. 1  | 1. 15575   | coding    |
| MSTRG. 3130. 2  | 1. 21849   | coding    |

|                |           |           |
|----------------|-----------|-----------|
| MSTRG. 3130.3  | 1.4215    | coding    |
| MSTRG. 3132.1  | 0.600055  | coding    |
| MSTRG. 3132.3  | 0.0481    | coding    |
| MSTRG. 3133.1  | 1.95317   | coding    |
| MSTRG. 3133.3  | 1.51617   | coding    |
| MSTRG. 3133.4  | 1.64659   | coding    |
| MSTRG. 3133.5  | 1.60777   | coding    |
| MSTRG. 3134.1  | 1.26635   | coding    |
| MSTRG. 3144.2  | 2.68291   | coding    |
| MSTRG. 3136.1  | -0.814796 | noncoding |
| MSTRG. 3137.1  | -2.26794  | noncoding |
| MSTRG. 3135.1  | -1.12187  | noncoding |
| MSTRG. 3135.2  | -0.956904 | noncoding |
| MSTRG. 3141.1  | -0.599945 | noncoding |
| MSTRG. 3146.1  | -1.72876  | noncoding |
| MSTRG. 3146.2  | -0.628379 | noncoding |
| MSTRG. 3153.1  | -1.19683  | noncoding |
| MSTRG. 3154.1  | 2.65008   | coding    |
| MSTRG. 3154.4  | 2.30552   | coding    |
| MSTRG. 3154.5  | 1.41355   | coding    |
| MSTRG. 3155.1  | -0.484766 | noncoding |
| MSTRG. 3151.1  | -1.77585  | noncoding |
| MSTRG. 3152.1  | 0.961507  | coding    |
| MSTRG. 3157.2  | 1.59658   | coding    |
| MSTRG. 3157.3  | 1.67734   | coding    |
| MSTRG. 3157.5  | 1.77218   | coding    |
| MSTRG. 3163.1  | -0.979538 | noncoding |
| MSTRG. 3166.3  | 0.126703  | coding    |
| MSTRG. 3166.6  | -0.163117 | noncoding |
| MSTRG. 3166.7  | 0.157977  | coding    |
| MSTRG. 3159.4  | 0.686031  | coding    |
| MSTRG. 3179.7  | 0.65215   | coding    |
| MSTRG. 3179.9  | -1.27189  | noncoding |
| MSTRG. 3179.10 | -0.058742 | noncoding |
| MSTRG. 3179.11 | 0.240459  | coding    |
| MSTRG. 3183.1  | -0.197861 | noncoding |
| MSTRG. 3173.1  | -0.138633 | noncoding |
| MSTRG. 3176.1  | 0.591157  | coding    |
| MSTRG. 3177.1  | -1.77353  | noncoding |
| MSTRG. 3178.3  | 0.832769  | coding    |
| MSTRG. 3185.1  | 1.27965   | coding    |
| MSTRG. 3185.2  | 1.09835   | coding    |
| MSTRG. 3186.1  | 0.966993  | coding    |
| MSTRG. 3185.3  | 0.078081  | coding    |
| MSTRG. 3186.6  | 0.216992  | coding    |
| MSTRG. 3186.4  | 2.23308   | coding    |
| MSTRG. 3186.9  | 2.1048    | coding    |
| MSTRG. 3186.10 | 1.29913   | coding    |
| MSTRG. 3186.11 | 2.00119   | coding    |
| MSTRG. 3186.12 | 1.30746   | coding    |
| MSTRG. 3187.1  | 0.506561  | coding    |
| MSTRG. 3188.1  | -0.73724  | noncoding |
| MSTRG. 3189.1  | -0.605071 | noncoding |
| MSTRG. 3190.2  | -0.666768 | noncoding |

|                |           |           |
|----------------|-----------|-----------|
| MSTRG. 3190. 3 | -0.691714 | noncoding |
| MSTRG. 3197. 1 | 0.509664  | coding    |
| MSTRG. 3198. 1 | 0.457464  | coding    |
| MSTRG. 3214. 1 | 0.539973  | coding    |
| MSTRG. 3221. 1 | -1.36318  | noncoding |
| MSTRG. 3226. 1 | -1.51496  | noncoding |
| MSTRG. 3228. 2 | 1.80767   | coding    |
| MSTRG. 3215. 1 | -0.294816 | noncoding |
| MSTRG. 3217. 1 | -0.183085 | noncoding |
| MSTRG. 3218. 1 | 1.01336   | coding    |
| MSTRG. 3220. 1 | -2.48673  | noncoding |
| MSTRG. 3234. 2 | 2.2068    | coding    |
| MSTRG. 3248. 1 | 0.004738  | coding    |
| MSTRG. 3249. 1 | 0.240493  | coding    |
| MSTRG. 3243. 1 | -1.52362  | noncoding |
| MSTRG. 3244. 1 | -1.59351  | noncoding |
| MSTRG. 3245. 1 | -2.00643  | noncoding |
| MSTRG. 3252. 1 | -2.22262  | noncoding |
| MSTRG. 3252. 3 | -2.17932  | noncoding |
| MSTRG. 3252. 4 | -1.22637  | noncoding |
| MSTRG. 3252. 5 | -1.45828  | noncoding |
| MSTRG. 3254. 1 | -2.36627  | noncoding |
| MSTRG. 3259. 3 | 1.50425   | coding    |
| MSTRG. 3259. 4 | 1.4452    | coding    |
| MSTRG. 3261. 1 | 0.1589    | coding    |
| MSTRG. 3263. 1 | -0.246388 | noncoding |
| MSTRG. 3264. 1 | -1.44356  | noncoding |
| MSTRG. 3267. 2 | 2.73308   | coding    |
| MSTRG. 3267. 4 | 3.29514   | coding    |
| MSTRG. 3269. 1 | -0.956704 | noncoding |
| MSTRG. 3270. 2 | 1.26492   | coding    |
| MSTRG. 3270. 3 | 0.937374  | coding    |
| MSTRG. 3271. 1 | 1.32679   | coding    |
| MSTRG. 3279. 1 | -0.256482 | noncoding |
| MSTRG. 3282. 2 | -0.869851 | noncoding |
| MSTRG. 3282. 3 | -0.932769 | noncoding |
| MSTRG. 3282. 4 | -0.942315 | noncoding |
| MSTRG. 3282. 6 | 0.026039  | coding    |
| MSTRG. 3282. 5 | -1.09041  | noncoding |
| MSTRG. 3282. 7 | -1.05373  | noncoding |
| MSTRG. 3294. 1 | -1.50424  | noncoding |
| MSTRG. 3294. 2 | -2.34864  | noncoding |
| MSTRG. 3296. 4 | -0.191933 | noncoding |
| MSTRG. 3296. 3 | 0.988128  | coding    |
| MSTRG. 3297. 5 | 1.61385   | coding    |
| MSTRG. 3300. 1 | 0.008935  | coding    |
| MSTRG. 3300. 2 | -0.025525 | noncoding |
| MSTRG. 3287. 1 | -1.84481  | noncoding |
| MSTRG. 3307. 1 | 1.92912   | coding    |
| MSTRG. 3307. 4 | 0.914449  | coding    |
| MSTRG. 3307. 2 | 1.40479   | coding    |
| MSTRG. 3307. 3 | 1.87691   | coding    |
| MSTRG. 3307. 6 | 1.24447   | coding    |
| MSTRG. 3312. 1 | 0.300063  | coding    |

|                |            |           |
|----------------|------------|-----------|
| MSTRG. 3314. 1 | -0. 672906 | noncoding |
| MSTRG. 3317. 2 | 2. 39884   | coding    |
| MSTRG. 3317. 3 | 2. 36706   | coding    |
| MSTRG. 3317. 4 | 2. 15322   | coding    |
| MSTRG. 3317. 5 | 1. 91341   | coding    |
| MSTRG. 3317. 6 | 2. 13424   | coding    |
| MSTRG. 3320. 1 | 0. 083776  | coding    |
| MSTRG. 3321. 4 | 0. 769431  | coding    |
| MSTRG. 3321. 3 | 0. 874618  | coding    |
| MSTRG. 3321. 6 | 1. 56535   | coding    |
| MSTRG. 3333. 1 | 0. 804462  | coding    |
| MSTRG. 3339. 3 | 1. 08527   | coding    |
| MSTRG. 3339. 4 | 2. 1922    | coding    |
| MSTRG. 3340. 1 | 0. 022342  | coding    |
| MSTRG. 3342. 2 | -0. 174614 | noncoding |
| MSTRG. 3342. 1 | 0. 154282  | coding    |
| MSTRG. 3343. 1 | -1. 34078  | noncoding |
| MSTRG. 3343. 2 | -0. 501603 | noncoding |
| MSTRG. 3346. 1 | -2. 71826  | noncoding |
| MSTRG. 3354. 3 | -1. 75061  | noncoding |
| MSTRG. 3357. 1 | 2. 44251   | coding    |
| MSTRG. 3357. 2 | 2. 51598   | coding    |
| MSTRG. 3358. 1 | -0. 856048 | noncoding |
| MSTRG. 3357. 4 | 1. 71436   | coding    |
| MSTRG. 3359. 6 | -0. 278586 | noncoding |
| MSTRG. 3364. 1 | 1. 49661   | coding    |
| MSTRG. 3364. 3 | 1. 6759    | coding    |
| MSTRG. 3364. 4 | 1. 21209   | coding    |
| MSTRG. 3364. 5 | 1. 31828   | coding    |
| MSTRG. 3364. 6 | 1. 21271   | coding    |
| MSTRG. 3364. 7 | 1. 19776   | coding    |
| MSTRG. 3371. 1 | 1. 61661   | coding    |
| MSTRG. 3373. 2 | 3. 11345   | coding    |
| MSTRG. 3374. 3 | -0. 24274  | noncoding |
| MSTRG. 3375. 1 | -1. 41484  | noncoding |
| MSTRG. 3381. 2 | 0. 26029   | coding    |
| MSTRG. 3384. 1 | 1. 23054   | coding    |
| MSTRG. 3389. 3 | 0. 370951  | coding    |
| MSTRG. 3389. 2 | 0. 210681  | coding    |
| MSTRG. 3389. 4 | -0. 227486 | noncoding |
| MSTRG. 3390. 2 | -0. 528478 | noncoding |
| MSTRG. 3415. 2 | 0. 020837  | coding    |
| MSTRG. 3415. 3 | 0. 705907  | coding    |
| MSTRG. 3418. 1 | 0. 640693  | coding    |
| MSTRG. 3420. 6 | 2. 84412   | coding    |
| MSTRG. 3420. 7 | 2. 8176    | coding    |
| MSTRG. 3420. 8 | 2. 80678   | coding    |
| MSTRG. 3421. 1 | 0. 092741  | coding    |
| MSTRG. 3424. 1 | 1. 98844   | coding    |
| MSTRG. 3400. 2 | 2. 38377   | coding    |
| MSTRG. 3400. 6 | 2. 39421   | coding    |
| MSTRG. 3400. 3 | 2. 34292   | coding    |
| MSTRG. 3400. 4 | 2. 40567   | coding    |
| MSTRG. 3401. 2 | -0. 64634  | noncoding |

|                 |            |           |
|-----------------|------------|-----------|
| MSTRG. 3402. 2  | 1. 88055   | coding    |
| MSTRG. 3427. 2  | 1. 92031   | coding    |
| MSTRG. 3429. 1  | 2. 09499   | coding    |
| MSTRG. 3434. 8  | 1. 84285   | coding    |
| MSTRG. 3435. 1  | 1. 21943   | coding    |
| MSTRG. 3435. 3  | 1. 03054   | coding    |
| MSTRG. 3438. 1  | -1. 0367   | noncoding |
| MSTRG. 3444. 1  | 0. 667495  | coding    |
| MSTRG. 3444. 3  | 0. 559306  | coding    |
| MSTRG. 3444. 5  | 0. 927128  | coding    |
| MSTRG. 3444. 7  | 0. 420667  | coding    |
| MSTRG. 3444. 12 | 0. 98082   | coding    |
| MSTRG. 3444. 13 | 0. 881854  | coding    |
| MSTRG. 3441. 3  | 0. 596515  | coding    |
| MSTRG. 3441. 4  | 0. 85329   | coding    |
| MSTRG. 3446. 1  | -0. 660319 | noncoding |
| MSTRG. 3470. 3  | -0. 893213 | noncoding |
| MSTRG. 3471. 3  | 1. 10792   | coding    |
| MSTRG. 3471. 1  | 0. 871998  | coding    |
| MSTRG. 3471. 5  | 1. 25349   | coding    |
| MSTRG. 3471. 4  | 1. 33552   | coding    |
| MSTRG. 3471. 10 | 0. 923157  | coding    |
| MSTRG. 3471. 11 | 1. 09645   | coding    |
| MSTRG. 3471. 12 | 0. 935538  | coding    |
| MSTRG. 3471. 13 | 1. 2416    | coding    |
| MSTRG. 3471. 14 | 0. 98115   | coding    |
| MSTRG. 3471. 16 | 0. 61711   | coding    |
| MSTRG. 3472. 3  | 1. 88632   | coding    |
| MSTRG. 3474. 1  | -1. 53697  | noncoding |
| MSTRG. 3475. 1  | 1. 47601   | coding    |
| MSTRG. 3475. 3  | 1. 39671   | coding    |
| MSTRG. 3477. 1  | -1. 11196  | noncoding |
| MSTRG. 3477. 2  | -2. 00834  | noncoding |
| MSTRG. 3478. 5  | 2. 04968   | coding    |
| MSTRG. 3478. 7  | 1. 90401   | coding    |
| MSTRG. 3482. 1  | 0. 984597  | coding    |
| MSTRG. 3447. 2  | -1. 63481  | noncoding |
| MSTRG. 3454. 1  | -1. 45499  | noncoding |
| MSTRG. 3463. 2  | 0. 081476  | coding    |
| MSTRG. 3469. 2  | -0. 797222 | noncoding |
| MSTRG. 3493. 2  | -0. 198538 | noncoding |
| MSTRG. 3497. 1  | -2. 05956  | noncoding |
| MSTRG. 3498. 2  | 0. 346033  | coding    |
| MSTRG. 3504. 1  | 0. 575131  | coding    |
| MSTRG. 3509. 1  | -2. 06863  | noncoding |
| MSTRG. 3521. 1  | 1. 3903    | coding    |
| MSTRG. 3521. 2  | 1. 96907   | coding    |
| MSTRG. 3521. 3  | 2. 04797   | coding    |
| MSTRG. 3521. 4  | 2. 00326   | coding    |
| MSTRG. 3521. 5  | 1. 99065   | coding    |
| MSTRG. 3521. 6  | 2. 09979   | coding    |
| MSTRG. 3521. 7  | 2. 15013   | coding    |
| MSTRG. 3521. 11 | 1. 53872   | coding    |
| MSTRG. 3530. 4  | 0. 743449  | coding    |

|                |            |           |
|----------------|------------|-----------|
| MSTRG. 3536. 2 | 0. 665671  | coding    |
| MSTRG. 3536. 3 | 0. 46536   | coding    |
| MSTRG. 3536. 4 | 0. 499527  | coding    |
| MSTRG. 3536. 5 | 0. 513589  | coding    |
| MSTRG. 3536. 6 | 0. 299809  | coding    |
| MSTRG. 3543. 3 | 1. 20208   | coding    |
| MSTRG. 3544. 1 | 1. 75968   | coding    |
| MSTRG. 3544. 2 | 1. 43533   | coding    |
| MSTRG. 3544. 4 | 1. 74319   | coding    |
| MSTRG. 3544. 3 | 1. 40854   | coding    |
| MSTRG. 3544. 7 | 1. 62311   | coding    |
| MSTRG. 3546. 1 | 2. 04025   | coding    |
| MSTRG. 3547. 5 | 2. 97038   | coding    |
| MSTRG. 3547. 4 | 3. 00975   | coding    |
| MSTRG. 3547. 6 | 0. 574029  | coding    |
| MSTRG. 3542. 4 | 1. 1693    | coding    |
| MSTRG. 3550. 3 | -0. 007686 | noncoding |
| MSTRG. 3548. 1 | -0. 146307 | noncoding |
| MSTRG. 3557. 2 | 1. 68579   | coding    |
| MSTRG. 3557. 3 | 1. 70391   | coding    |
| MSTRG. 3558. 1 | 0. 191091  | coding    |
| MSTRG. 3559. 1 | 0. 825675  | coding    |
| MSTRG. 3561. 4 | 0. 301311  | coding    |
| MSTRG. 3561. 5 | 1. 01      | coding    |
| MSTRG. 3561. 6 | 0. 77155   | coding    |
| MSTRG. 3561. 7 | 1. 42642   | coding    |
| MSTRG. 3563. 3 | -0. 192264 | noncoding |
| MSTRG. 3563. 4 | -0. 107734 | noncoding |
| MSTRG. 3565. 1 | 0. 646412  | coding    |
| MSTRG. 3562. 1 | 1. 79671   | coding    |
| MSTRG. 3566. 3 | 1. 76564   | coding    |
| MSTRG. 3566. 2 | 1. 79108   | coding    |
| MSTRG. 3570. 2 | 1. 94045   | coding    |
| MSTRG. 3580. 1 | 1. 0393    | coding    |
| MSTRG. 3580. 2 | 0. 318098  | coding    |
| MSTRG. 3588. 6 | 0. 79622   | coding    |
| MSTRG. 3588. 7 | 0. 594295  | coding    |
| MSTRG. 3592. 6 | -0. 889851 | noncoding |
| MSTRG. 3593. 3 | -1. 86227  | noncoding |
| MSTRG. 3598. 1 | 1. 41427   | coding    |
| MSTRG. 3602. 1 | 1. 81244   | coding    |
| MSTRG. 3604. 2 | 1. 31367   | coding    |
| MSTRG. 3604. 3 | 1. 31067   | coding    |
| MSTRG. 3604. 4 | 0. 572263  | coding    |
| MSTRG. 3604. 5 | 0. 546833  | coding    |
| MSTRG. 3604. 6 | 0. 585862  | coding    |
| MSTRG. 3606. 2 | 0. 377969  | coding    |
| MSTRG. 3606. 3 | 0. 003118  | coding    |
| MSTRG. 3612. 3 | -0. 524867 | noncoding |
| MSTRG. 3612. 2 | 1. 69977   | coding    |
| MSTRG. 3612. 4 | 0. 911861  | coding    |
| MSTRG. 3614. 1 | -0. 743716 | noncoding |
| MSTRG. 3623. 1 | 0. 773371  | coding    |
| MSTRG. 3623. 2 | 2. 71832   | coding    |

|                 |            |           |
|-----------------|------------|-----------|
| MSTRG. 3623. 7  | 2. 48361   | coding    |
| MSTRG. 3631. 1  | -1. 78278  | noncoding |
| MSTRG. 3633. 4  | -1. 47041  | noncoding |
| MSTRG. 3642. 2  | 0. 88656   | coding    |
| MSTRG. 3642. 3  | 0. 663394  | coding    |
| MSTRG. 3650. 1  | 0. 65615   | coding    |
| MSTRG. 3651. 1  | -0. 164988 | noncoding |
| MSTRG. 3652. 1  | 0. 969276  | coding    |
| MSTRG. 3654. 1  | -0. 651676 | noncoding |
| MSTRG. 3658. 1  | -1. 40639  | noncoding |
| MSTRG. 3659. 2  | 1. 0158    | coding    |
| MSTRG. 3663. 1  | -1. 92571  | noncoding |
| MSTRG. 3664. 1  | -1. 55922  | noncoding |
| MSTRG. 3675. 1  | 2. 39574   | coding    |
| MSTRG. 3675. 2  | 2. 37406   | coding    |
| MSTRG. 3675. 3  | 2. 35395   | coding    |
| MSTRG. 3675. 4  | 1. 78512   | coding    |
| MSTRG. 3675. 5  | 1. 18495   | coding    |
| MSTRG. 3675. 6  | 1. 85665   | coding    |
| MSTRG. 3675. 7  | 1. 77779   | coding    |
| MSTRG. 3675. 8  | 2. 32279   | coding    |
| MSTRG. 3675. 9  | 2. 18955   | coding    |
| MSTRG. 3675. 10 | 2. 02199   | coding    |
| MSTRG. 3675. 11 | 0. 449121  | coding    |
| MSTRG. 3676. 1  | 0. 730096  | coding    |
| MSTRG. 3674. 1  | -2. 29706  | noncoding |
| MSTRG. 3679. 1  | 0. 385562  | coding    |
| MSTRG. 3679. 2  | 0. 823065  | coding    |
| MSTRG. 3679. 3  | 0. 621122  | coding    |
| MSTRG. 3685. 1  | 2. 87976   | coding    |
| MSTRG. 3685. 2  | 2. 95887   | coding    |
| MSTRG. 3687. 2  | 0. 253478  | coding    |
| MSTRG. 3694. 1  | -0. 209221 | noncoding |
| MSTRG. 3702. 2  | 0. 856961  | coding    |
| MSTRG. 3702. 3  | 1. 0057    | coding    |
| MSTRG. 3704. 1  | -1. 79521  | noncoding |
| MSTRG. 3707. 2  | 2. 65136   | coding    |
| MSTRG. 3707. 3  | -1. 71084  | noncoding |
| MSTRG. 3708. 2  | -0. 503384 | noncoding |
| MSTRG. 3710. 1  | 1. 62906   | coding    |
| MSTRG. 3712. 1  | -0. 15082  | noncoding |
| MSTRG. 3710. 4  | 1. 0379    | coding    |
| MSTRG. 3710. 5  | 1. 08396   | coding    |
| MSTRG. 3716. 2  | 2. 2332    | coding    |
| MSTRG. 3716. 3  | 2. 21811   | coding    |
| MSTRG. 3716. 5  | 2. 31301   | coding    |
| MSTRG. 3716. 6  | 2. 25557   | coding    |
| MSTRG. 3716. 7  | 2. 12569   | coding    |
| MSTRG. 3716. 9  | 1. 19273   | coding    |
| MSTRG. 3725. 1  | -1. 17633  | noncoding |
| MSTRG. 3733. 3  | -0. 78123  | noncoding |
| MSTRG. 3737. 2  | 1. 41725   | coding    |
| MSTRG. 3721. 1  | -0. 547974 | noncoding |
| MSTRG. 3721. 2  | -0. 248525 | noncoding |

|                |            |           |
|----------------|------------|-----------|
| MSTRG. 3722. 1 | 1. 56075   | coding    |
| MSTRG. 3748. 4 | 1. 30293   | coding    |
| MSTRG. 3749. 6 | 2. 37128   | coding    |
| MSTRG. 3749. 7 | 2. 47892   | coding    |
| MSTRG. 3749. 3 | 2. 52375   | coding    |
| MSTRG. 3749. 5 | 2. 5523    | coding    |
| MSTRG. 3755. 1 | -0. 215885 | noncoding |
| MSTRG. 3764. 2 | 1. 10592   | coding    |
| MSTRG. 3765. 1 | -1. 67861  | noncoding |
| MSTRG. 3765. 2 | -0. 85614  | noncoding |
| MSTRG. 3767. 1 | -1. 21406  | noncoding |
| MSTRG. 3768. 1 | 0. 278511  | coding    |
| MSTRG. 3769. 1 | -0. 053121 | noncoding |
| MSTRG. 3770. 1 | -0. 793641 | noncoding |
| MSTRG. 3773. 2 | -1. 33135  | noncoding |
| MSTRG. 3773. 3 | -0. 06676  | noncoding |
| MSTRG. 3773. 4 | 0. 32968   | coding    |
| MSTRG. 3777. 2 | -1. 59454  | noncoding |
| MSTRG. 3778. 1 | 1. 70211   | coding    |
| MSTRG. 3756. 2 | -1. 38626  | noncoding |
| MSTRG. 3780. 4 | 1. 77893   | coding    |
| MSTRG. 3780. 5 | -1. 5056   | noncoding |
| MSTRG. 3784. 1 | -1. 44144  | noncoding |
| MSTRG. 3788. 1 | -0. 937192 | noncoding |
| MSTRG. 3789. 1 | 2. 45198   | coding    |
| MSTRG. 3789. 3 | 2. 76364   | coding    |
| MSTRG. 3790. 1 | -0. 423039 | noncoding |
| MSTRG. 3800. 1 | 0. 068602  | coding    |
| MSTRG. 3802. 2 | 1. 55905   | coding    |
| MSTRG. 3802. 3 | 1. 58367   | coding    |
| MSTRG. 3802. 4 | 1. 80003   | coding    |
| MSTRG. 3802. 5 | 1. 68407   | coding    |
| MSTRG. 3804. 1 | 2. 68439   | coding    |
| MSTRG. 3807. 1 | -0. 062186 | noncoding |
| MSTRG. 3813. 1 | -0. 264144 | noncoding |
| MSTRG. 3817. 3 | 2. 62877   | coding    |
| MSTRG. 3821. 2 | 1. 63731   | coding    |
| MSTRG. 3821. 1 | 1. 1357    | coding    |
| MSTRG. 3821. 4 | 1. 75314   | coding    |
| MSTRG. 3831. 5 | 1. 26357   | coding    |
| MSTRG. 3832. 3 | 1. 2282    | coding    |
| MSTRG. 3832. 4 | 0. 969792  | coding    |
| MSTRG. 3832. 5 | 1. 07251   | coding    |
| MSTRG. 3833. 1 | -0. 002201 | noncoding |
| MSTRG. 3834. 1 | 0. 990112  | coding    |
| MSTRG. 3834. 2 | 0. 861023  | coding    |
| MSTRG. 3839. 1 | 1. 32655   | coding    |
| MSTRG. 3825. 2 | 1. 39926   | coding    |
| MSTRG. 3825. 1 | 1. 42528   | coding    |
| MSTRG. 3828. 1 | 0. 733844  | coding    |
| MSTRG. 3842. 1 | -0. 406936 | noncoding |
| MSTRG. 3842. 2 | -0. 440268 | noncoding |
| MSTRG. 3842. 3 | -0. 182714 | noncoding |
| MSTRG. 3842. 4 | 0. 105806  | coding    |



|                |            |           |
|----------------|------------|-----------|
| MSTRG. 3842. 6 | 1. 87494   | coding    |
| MSTRG. 3855. 1 | 0. 28715   | coding    |
| MSTRG. 3854. 3 | 0. 904129  | coding    |
| MSTRG. 3856. 1 | -1. 82124  | noncoding |
| MSTRG. 3852. 1 | 0. 768961  | coding    |
| MSTRG. 3852. 2 | 1. 36541   | coding    |
| MSTRG. 3868. 1 | -0. 744265 | noncoding |
| MSTRG. 3969. 1 | 0. 83064   | coding    |
| MSTRG. 3970. 1 | -1. 01305  | noncoding |
| MSTRG. 3971. 1 | -0. 344109 | noncoding |
| MSTRG. 3975. 1 | -0. 263415 | noncoding |
| MSTRG. 3976. 1 | -0. 121082 | noncoding |
| MSTRG. 3977. 1 | 0. 326171  | coding    |
| MSTRG. 3978. 1 | -1. 08475  | noncoding |
| MSTRG. 3979. 1 | 0. 428327  | coding    |
| MSTRG. 3980. 1 | -2. 1696   | noncoding |
| MSTRG. 3972. 5 | 0. 104045  | coding    |
| MSTRG. 3981. 1 | -2. 10345  | noncoding |
| MSTRG. 3982. 1 | -2. 22779  | noncoding |
| MSTRG. 3983. 1 | -0. 075169 | noncoding |
| MSTRG. 3983. 2 | -1. 17849  | noncoding |
| MSTRG. 3984. 1 | 1. 10908   | coding    |
| MSTRG. 3984. 2 | -0. 486267 | noncoding |
| MSTRG. 3985. 1 | 0. 244617  | coding    |
| MSTRG. 3985. 2 | -0. 591264 | noncoding |
| MSTRG. 3972. 6 | -0. 003195 | noncoding |
| MSTRG. 3986. 1 | -0. 931049 | noncoding |
| MSTRG. 3987. 1 | 0. 281332  | coding    |
| MSTRG. 3987. 2 | -0. 36531  | noncoding |
| MSTRG. 3987. 3 | -0. 559593 | noncoding |
| MSTRG. 3987. 4 | -1. 46223  | noncoding |
| MSTRG. 3989. 1 | 0. 825648  | coding    |
| MSTRG. 3972. 9 | -0. 053585 | noncoding |
| MSTRG. 3991. 1 | -1. 24934  | noncoding |
| MSTRG. 3877. 1 | -0. 840552 | noncoding |
| MSTRG. 3883. 1 | -2. 34485  | noncoding |
| MSTRG. 3889. 2 | 0. 480678  | coding    |
| MSTRG. 3890. 1 | 0. 620506  | coding    |
| MSTRG. 3893. 1 | -0. 02938  | noncoding |
| MSTRG. 3895. 3 | 2. 39097   | coding    |
| MSTRG. 3895. 4 | 2. 56986   | coding    |
| MSTRG. 3895. 6 | 1. 90667   | coding    |
| MSTRG. 3895. 7 | 2. 462     | coding    |
| MSTRG. 3896. 1 | -2. 21738  | noncoding |
| MSTRG. 3897. 1 | 1. 49787   | coding    |
| MSTRG. 3900. 2 | 2. 19971   | coding    |
| MSTRG. 3902. 2 | 1. 51651   | coding    |
| MSTRG. 3903. 2 | 1. 10108   | coding    |
| MSTRG. 3903. 3 | 1. 49273   | coding    |
| MSTRG. 3903. 4 | 0. 769623  | coding    |
| MSTRG. 3903. 5 | 0. 330267  | coding    |
| MSTRG. 3910. 2 | 2. 37559   | coding    |
| MSTRG. 3911. 3 | 1. 16866   | coding    |
| MSTRG. 3913. 3 | 1. 46935   | coding    |

|                 |            |           |
|-----------------|------------|-----------|
| MSTRG. 3918. 1  | -1. 59359  | noncoding |
| MSTRG. 3935. 6  | 2. 1556    | coding    |
| MSTRG. 3935. 5  | 2. 32491   | coding    |
| MSTRG. 3935. 7  | 2. 20903   | coding    |
| MSTRG. 3935. 8  | 1. 47348   | coding    |
| MSTRG. 3935. 9  | 1. 07404   | coding    |
| MSTRG. 3935. 11 | -0. 256709 | noncoding |
| MSTRG. 3936. 1  | -1. 56547  | noncoding |
| MSTRG. 3937. 1  | -0. 320434 | noncoding |
| MSTRG. 3930. 1  | -1. 60177  | noncoding |
| MSTRG. 3934. 1  | -1. 03969  | noncoding |
| MSTRG. 3939. 2  | 0. 759215  | coding    |
| MSTRG. 3939. 4  | 0. 333658  | coding    |
| MSTRG. 3940. 3  | 0. 91309   | coding    |
| MSTRG. 3940. 6  | 0. 156548  | coding    |
| MSTRG. 3940. 7  | 0. 9388    | coding    |
| MSTRG. 3941. 1  | -1. 49179  | noncoding |
| MSTRG. 3954. 1  | -2. 78486  | noncoding |
| MSTRG. 3959. 2  | 2. 09589   | coding    |
| MSTRG. 3960. 1  | -1. 20843  | noncoding |
| MSTRG. 3963. 3  | 1. 91171   | coding    |
| MSTRG. 3964. 1  | -1. 82015  | noncoding |
| MSTRG. 3963. 6  | 1. 4468    | coding    |
| MSTRG. 3965. 2  | 0. 841054  | coding    |
| MSTRG. 3993. 2  | 1. 33723   | coding    |
| MSTRG. 3995. 1  | -2. 73079  | noncoding |
| MSTRG. 3997. 3  | -0. 30947  | noncoding |
| MSTRG. 3997. 2  | 0. 68139   | coding    |
| MSTRG. 4000. 1  | 0. 405986  | coding    |
| MSTRG. 4003. 1  | 1. 76572   | coding    |
| MSTRG. 4003. 3  | 0. 741419  | coding    |
| MSTRG. 4003. 4  | 0. 957713  | coding    |
| MSTRG. 4004. 1  | 0. 53597   | coding    |
| MSTRG. 4006. 1  | 0. 557788  | coding    |
| MSTRG. 4006. 2  | 0. 380799  | coding    |
| MSTRG. 4010. 2  | 1. 3383    | coding    |
| MSTRG. 4010. 1  | 1. 56595   | coding    |
| MSTRG. 4010. 3  | 1. 67786   | coding    |
| MSTRG. 4011. 1  | -0. 504316 | noncoding |
| MSTRG. 4010. 6  | -0. 494415 | noncoding |
| MSTRG. 4014. 1  | 0. 646897  | coding    |
| MSTRG. 4017. 1  | 1. 12692   | coding    |
| MSTRG. 4017. 3  | 0. 97911   | coding    |
| MSTRG. 4008. 3  | 0. 935262  | coding    |
| MSTRG. 4020. 1  | 1. 60039   | coding    |
| MSTRG. 4023. 2  | 1. 72796   | coding    |
| MSTRG. 4024. 2  | -0. 365183 | noncoding |
| MSTRG. 4024. 4  | -0. 708995 | noncoding |
| MSTRG. 4024. 5  | -0. 318533 | noncoding |
| MSTRG. 4026. 1  | 2. 29217   | coding    |
| MSTRG. 4026. 2  | 2. 41287   | coding    |
| MSTRG. 4026. 3  | 2. 14682   | coding    |
| MSTRG. 4026. 4  | 1. 52216   | coding    |
| MSTRG. 4026. 5  | 2. 26719   | coding    |

|                |            |           |
|----------------|------------|-----------|
| MSTRG. 4026. 6 | 2. 50926   | coding    |
| MSTRG. 4028. 5 | 2. 2669    | coding    |
| MSTRG. 4028. 6 | 1. 77139   | coding    |
| MSTRG. 4028. 7 | 1. 71133   | coding    |
| MSTRG. 4028. 8 | 2. 33312   | coding    |
| MSTRG. 4028. 9 | 1. 71974   | coding    |
| MSTRG. 4030. 3 | 1. 3066    | coding    |
| MSTRG. 4036. 1 | 2. 13438   | coding    |
| MSTRG. 4037. 1 | -2. 4925   | noncoding |
| MSTRG. 4047. 3 | 2. 73649   | coding    |
| MSTRG. 4047. 4 | -0. 101306 | noncoding |
| MSTRG. 4047. 5 | 2. 86662   | coding    |
| MSTRG. 4047. 6 | -0. 523809 | noncoding |
| MSTRG. 4047. 7 | 2. 73432   | coding    |
| MSTRG. 4047. 8 | 2. 20736   | coding    |
| MSTRG. 4047. 9 | 0. 332666  | coding    |
| MSTRG. 4038. 1 | -1. 05612  | noncoding |
| MSTRG. 4051. 1 | 1. 69175   | coding    |
| MSTRG. 4051. 2 | 1. 4774    | coding    |
| MSTRG. 4052. 4 | 0. 812383  | coding    |
| MSTRG. 4053. 1 | -0. 62422  | noncoding |
| MSTRG. 4055. 1 | -1. 8026   | noncoding |
| MSTRG. 4058. 1 | 1. 72862   | coding    |
| MSTRG. 4058. 5 | 2. 27747   | coding    |
| MSTRG. 4072. 1 | 1. 72519   | coding    |
| MSTRG. 4072. 3 | -1. 60963  | noncoding |
| MSTRG. 4074. 1 | -1. 83574  | noncoding |
| MSTRG. 4079. 1 | -0. 357215 | noncoding |
| MSTRG. 4080. 1 | -3. 02362  | noncoding |
| MSTRG. 4081. 1 | 0. 302636  | coding    |
| MSTRG. 4082. 1 | -1. 64944  | noncoding |
| MSTRG. 4083. 1 | 0. 88502   | coding    |
| MSTRG. 4068. 2 | 2. 52057   | coding    |
| MSTRG. 4070. 1 | -1. 10909  | noncoding |
| MSTRG. 4092. 3 | 0. 93335   | coding    |
| MSTRG. 4092. 4 | 0. 729776  | coding    |
| MSTRG. 4093. 1 | 0. 115234  | coding    |
| MSTRG. 4093. 2 | -2. 35468  | noncoding |
| MSTRG. 4094. 1 | 0. 111405  | coding    |
| MSTRG. 4095. 1 | -1. 76559  | noncoding |
| MSTRG. 4096. 1 | -0. 988987 | noncoding |
| MSTRG. 4092. 5 | 1. 49565   | coding    |
| MSTRG. 4092. 6 | 1. 64542   | coding    |
| MSTRG. 4092. 7 | 0. 225506  | coding    |
| MSTRG. 4092. 8 | 0. 666875  | coding    |
| MSTRG. 4099. 1 | 0. 917284  | coding    |
| MSTRG. 4104. 1 | 0. 254359  | coding    |
| MSTRG. 4108. 1 | 0. 574912  | coding    |
| MSTRG. 4108. 2 | 0. 420262  | coding    |
| MSTRG. 4108. 3 | 1. 21961   | coding    |
| MSTRG. 4108. 6 | -0. 19355  | noncoding |
| MSTRG. 4108. 5 | 0. 546092  | coding    |
| MSTRG. 4116. 1 | 1. 18902   | coding    |
| MSTRG. 4122. 3 | 0. 833695  | coding    |

|                |            |           |
|----------------|------------|-----------|
| MSTRG. 4122. 2 | 0. 99701   | coding    |
| MSTRG. 4122. 1 | 1. 19092   | coding    |
| MSTRG. 4125. 3 | 0. 750205  | coding    |
| MSTRG. 4129. 4 | 1. 45094   | coding    |
| MSTRG. 4129. 7 | 1. 57338   | coding    |
| MSTRG. 4129. 8 | 1. 80216   | coding    |
| MSTRG. 4129. 9 | 1. 73751   | coding    |
| MSTRG. 4130. 1 | 0. 547798  | coding    |
| MSTRG. 4143. 2 | 0. 21271   | coding    |
| MSTRG. 4143. 4 | -2. 19275  | noncoding |
| MSTRG. 4143. 3 | 0. 88501   | coding    |
| MSTRG. 4144. 1 | -2. 51708  | noncoding |
| MSTRG. 4143. 6 | 0. 433975  | coding    |
| MSTRG. 4146. 2 | 0. 682587  | coding    |
| MSTRG. 4147. 1 | -1. 57789  | noncoding |
| MSTRG. 4152. 2 | 0. 704433  | coding    |
| MSTRG. 4131. 1 | -2. 87223  | noncoding |
| MSTRG. 4132. 3 | 2. 10684   | coding    |
| MSTRG. 4132. 5 | 2. 17581   | coding    |
| MSTRG. 4132. 6 | 1. 82285   | coding    |
| MSTRG. 4133. 1 | 1. 25451   | coding    |
| MSTRG. 4134. 1 | -0. 593358 | noncoding |
| MSTRG. 4139. 1 | -0. 069854 | noncoding |
| MSTRG. 4163. 2 | 2. 51021   | coding    |
| MSTRG. 4163. 1 | 2. 39263   | coding    |
| MSTRG. 4163. 3 | 1. 05469   | coding    |
| MSTRG. 4163. 4 | 2. 31586   | coding    |
| MSTRG. 4163. 5 | 2. 43062   | coding    |
| MSTRG. 4163. 6 | 1. 77807   | coding    |
| MSTRG. 4163. 7 | 1. 99445   | coding    |
| MSTRG. 4162. 1 | -2. 45303  | noncoding |
| MSTRG. 4178. 5 | 1. 83665   | coding    |
| MSTRG. 4178. 3 | 1. 89236   | coding    |
| MSTRG. 4178. 6 | 1. 00968   | coding    |
| MSTRG. 4178. 4 | 1. 09731   | coding    |
| MSTRG. 4178. 8 | 1. 06433   | coding    |
| MSTRG. 4178. 7 | 1. 39522   | coding    |
| MSTRG. 4183. 1 | -1. 03098  | noncoding |
| MSTRG. 4186. 1 | 0. 139226  | coding    |
| MSTRG. 4186. 2 | -0. 121341 | noncoding |
| MSTRG. 4186. 3 | -0. 460351 | noncoding |
| MSTRG. 4187. 1 | -2. 21381  | noncoding |
| MSTRG. 4203. 3 | 1. 03392   | coding    |
| MSTRG. 4203. 5 | 0. 137707  | coding    |
| MSTRG. 4203. 2 | 0. 39556   | coding    |
| MSTRG. 4203. 6 | -0. 082951 | noncoding |
| MSTRG. 4203. 7 | 0. 834617  | coding    |
| MSTRG. 4213. 3 | 0. 861598  | coding    |
| MSTRG. 4214. 1 | -0. 277802 | noncoding |
| MSTRG. 4216. 1 | -2. 55118  | noncoding |
| MSTRG. 4217. 3 | -1. 31317  | noncoding |
| MSTRG. 4226. 1 | 1. 76699   | coding    |
| MSTRG. 4226. 2 | 1. 4794    | coding    |
| MSTRG. 4227. 1 | -1. 79526  | noncoding |

|                |            |           |
|----------------|------------|-----------|
| MSTRG. 4226. 3 | 0. 376841  | coding    |
| MSTRG. 4228. 7 | 1. 27672   | coding    |
| MSTRG. 4228. 3 | 1. 11214   | coding    |
| MSTRG. 4229. 4 | -0. 388673 | noncoding |
| MSTRG. 4229. 2 | -0. 127818 | noncoding |
| MSTRG. 4229. 3 | 1. 40407   | coding    |
| MSTRG. 4230. 1 | -1. 04799  | noncoding |
| MSTRG. 4231. 1 | -2. 00913  | noncoding |
| MSTRG. 4219. 1 | -2. 22072  | noncoding |
| MSTRG. 4246. 3 | -2. 39846  | noncoding |
| MSTRG. 4250. 5 | -1. 05442  | noncoding |
| MSTRG. 4256. 1 | 2. 10798   | coding    |
| MSTRG. 4256. 3 | 1. 64726   | coding    |
| MSTRG. 4256. 2 | 1. 66218   | coding    |
| MSTRG. 4256. 4 | 1. 65037   | coding    |
| MSTRG. 4257. 1 | -1. 82246  | noncoding |
| MSTRG. 4260. 3 | 0. 585608  | coding    |
| MSTRG. 4260. 4 | 0. 701415  | coding    |
| MSTRG. 4261. 3 | 2. 0719    | coding    |
| MSTRG. 4261. 2 | 2. 13633   | coding    |
| MSTRG. 4261. 4 | 1. 31685   | coding    |
| MSTRG. 4262. 1 | -2. 18561  | noncoding |
| MSTRG. 4293. 3 | -0. 143629 | noncoding |
| MSTRG. 4293. 4 | -0. 099429 | noncoding |
| MSTRG. 4293. 5 | 0. 150087  | coding    |
| MSTRG. 4293. 6 | -0. 506036 | noncoding |
| MSTRG. 4293. 7 | -0. 315846 | noncoding |
| MSTRG. 4296. 1 | -1. 36494  | noncoding |
| MSTRG. 4301. 2 | 2. 07165   | coding    |
| MSTRG. 4301. 1 | 2. 08896   | coding    |
| MSTRG. 4301. 3 | 2. 05176   | coding    |
| MSTRG. 4301. 4 | 1. 82295   | coding    |
| MSTRG. 4301. 5 | 1. 99589   | coding    |
| MSTRG. 4301. 6 | 1. 98356   | coding    |
| MSTRG. 4302. 1 | -0. 053261 | noncoding |
| MSTRG. 4303. 2 | -0. 181193 | noncoding |
| MSTRG. 4304. 2 | -0. 353615 | noncoding |
| MSTRG. 4297. 1 | -1. 27557  | noncoding |
| MSTRG. 4298. 1 | -1. 23024  | noncoding |
| MSTRG. 4312. 5 | 0. 590012  | coding    |
| MSTRG. 4312. 4 | 2. 94368   | coding    |
| MSTRG. 4312. 2 | 2. 65824   | coding    |
| MSTRG. 4312. 1 | 1. 7396    | coding    |
| MSTRG. 4312. 3 | 2. 66351   | coding    |
| MSTRG. 4310. 2 | 0. 264522  | coding    |
| MSTRG. 4317. 2 | 1. 51525   | coding    |
| MSTRG. 4319. 1 | 0. 960225  | coding    |
| MSTRG. 4319. 2 | 0. 803084  | coding    |
| MSTRG. 4319. 3 | 0. 975058  | coding    |
| MSTRG. 4319. 4 | 0. 568997  | coding    |
| MSTRG. 4319. 5 | -0. 920489 | noncoding |
| MSTRG. 4325. 2 | 0. 717322  | coding    |
| MSTRG. 4325. 3 | -0. 82007  | noncoding |
| MSTRG. 4326. 2 | -0. 712253 | noncoding |

|                 |            |           |
|-----------------|------------|-----------|
| MSTRG. 4328. 2  | -0. 016709 | noncoding |
| MSTRG. 4328. 6  | -0. 098551 | noncoding |
| MSTRG. 4328. 5  | 1. 03357   | coding    |
| MSTRG. 4328. 7  | 0. 786511  | coding    |
| MSTRG. 4328. 11 | 0. 29232   | coding    |
| MSTRG. 4329. 3  | 2. 95168   | coding    |
| MSTRG. 4330. 1  | -3. 0683   | noncoding |
| MSTRG. 4335. 2  | 2. 27192   | coding    |
| MSTRG. 4341. 1  | -1. 33285  | noncoding |
| MSTRG. 4341. 2  | -0. 13067  | noncoding |
| MSTRG. 4341. 3  | -0. 516055 | noncoding |
| MSTRG. 4343. 1  | 2. 54145   | coding    |
| MSTRG. 4344. 1  | -1. 52357  | noncoding |
| MSTRG. 4340. 1  | -1. 75154  | noncoding |
| MSTRG. 4346. 2  | -2. 12191  | noncoding |
| MSTRG. 4345. 1  | 0. 878596  | coding    |
| MSTRG. 4359. 2  | 3. 18023   | coding    |
| MSTRG. 4357. 1  | 0. 808856  | coding    |
| MSTRG. 4358. 2  | 1. 00901   | coding    |
| MSTRG. 4360. 2  | 0. 537314  | coding    |
| MSTRG. 4361. 1  | 0. 391302  | coding    |
| MSTRG. 4361. 3  | -0. 491708 | noncoding |
| MSTRG. 4363. 1  | 1. 57486   | coding    |
| MSTRG. 4363. 2  | 1. 01531   | coding    |
| MSTRG. 4363. 3  | 2. 39177   | coding    |
| MSTRG. 4367. 4  | 0. 381567  | coding    |
| MSTRG. 4367. 5  | 0. 152614  | coding    |
| MSTRG. 4369. 1  | 0. 105907  | coding    |
| MSTRG. 4365. 2  | 0. 149187  | coding    |
| MSTRG. 4371. 1  | -0. 290093 | noncoding |
| MSTRG. 4371. 2  | -0. 167226 | noncoding |
| MSTRG. 4375. 1  | -1. 80575  | noncoding |
| MSTRG. 4372. 2  | 1. 8685    | coding    |
| MSTRG. 4382. 1  | -0. 92923  | noncoding |
| MSTRG. 4388. 1  | 2. 01755   | coding    |
| MSTRG. 4388. 3  | 2. 4788    | coding    |
| MSTRG. 4388. 9  | 2. 0136    | coding    |
| MSTRG. 4384. 2  | 0. 469128  | coding    |
| MSTRG. 4390. 1  | -0. 447752 | noncoding |
| MSTRG. 4390. 2  | -1. 91495  | noncoding |
| MSTRG. 4390. 3  | -2. 47456  | noncoding |
| MSTRG. 4399. 1  | -2. 19656  | noncoding |
| MSTRG. 4400. 2  | 1. 72116   | coding    |
| MSTRG. 4401. 2  | 0. 685048  | coding    |
| MSTRG. 4401. 3  | 0. 748979  | coding    |
| MSTRG. 4399. 3  | 1. 16795   | coding    |
| MSTRG. 4401. 5  | 0. 518322  | coding    |
| MSTRG. 4401. 8  | 0. 443913  | coding    |
| MSTRG. 4401. 9  | 0. 243368  | coding    |
| MSTRG. 4401. 11 | 0. 383795  | coding    |
| MSTRG. 4401. 12 | 0. 358501  | coding    |
| MSTRG. 4401. 10 | 0. 289719  | coding    |
| MSTRG. 4401. 13 | 0. 368859  | coding    |
| MSTRG. 4401. 14 | 0. 39337   | coding    |

|                 |            |           |
|-----------------|------------|-----------|
| MSTRG. 4401. 16 | 0. 046778  | coding    |
| MSTRG. 4403. 1  | 0. 852512  | coding    |
| MSTRG. 4403. 3  | 1. 91135   | coding    |
| MSTRG. 4404. 1  | -0. 645869 | noncoding |
| MSTRG. 4408. 1  | 0. 206093  | coding    |
| MSTRG. 4409. 2  | 1. 29191   | coding    |
| MSTRG. 4409. 3  | 0. 935975  | coding    |
| MSTRG. 4411. 1  | 1. 07962   | coding    |
| MSTRG. 4411. 2  | 1. 31771   | coding    |
| MSTRG. 4412. 1  | 1. 26512   | coding    |
| MSTRG. 4412. 2  | 1. 31073   | coding    |
| MSTRG. 4412. 3  | 0. 815577  | coding    |
| MSTRG. 4413. 1  | 0. 751696  | coding    |
| MSTRG. 4413. 2  | 0. 927477  | coding    |
| MSTRG. 4413. 5  | 0. 669004  | coding    |
| MSTRG. 4414. 2  | 0. 685811  | coding    |
| MSTRG. 4418. 1  | 3. 12611   | coding    |
| MSTRG. 4420. 9  | 0. 394898  | coding    |
| MSTRG. 4420. 10 | 0. 493005  | coding    |
| MSTRG. 4420. 11 | 0. 517473  | coding    |
| MSTRG. 4421. 1  | 0. 078973  | coding    |
| MSTRG. 4422. 1  | -2. 02479  | noncoding |
| MSTRG. 4422. 2  | -1. 85344  | noncoding |
| MSTRG. 4423. 4  | 1. 35963   | coding    |
| MSTRG. 4423. 5  | 1. 31431   | coding    |
| MSTRG. 4424. 1  | -2. 14333  | noncoding |
| MSTRG. 4426. 4  | 2. 37133   | coding    |
| MSTRG. 4428. 2  | 1. 67058   | coding    |
| MSTRG. 4429. 1  | -1. 08558  | noncoding |
| MSTRG. 4431. 1  | -0. 581797 | noncoding |
| MSTRG. 4432. 2  | 0. 266359  | coding    |
| MSTRG. 4434. 1  | 0. 353896  | coding    |
| MSTRG. 4446. 2  | 0. 342284  | coding    |
| MSTRG. 4446. 1  | 1. 68354   | coding    |
| MSTRG. 4446. 4  | 1. 58756   | coding    |
| MSTRG. 4448. 1  | 0. 097135  | coding    |
| MSTRG. 4448. 2  | -0. 709718 | noncoding |
| MSTRG. 4449. 1  | -0. 36788  | noncoding |
| MSTRG. 4450. 1  | -1. 02935  | noncoding |
| MSTRG. 4451. 1  | -0. 319796 | noncoding |
| MSTRG. 4452. 1  | -1. 07287  | noncoding |
| MSTRG. 4454. 1  | -0. 127637 | noncoding |
| MSTRG. 4456. 1  | -2. 48812  | noncoding |
| MSTRG. 4443. 3  | 0. 346934  | coding    |
| MSTRG. 4445. 1  | -0. 15993  | noncoding |
| MSTRG. 4462. 1  | 0. 23308   | coding    |
| MSTRG. 4462. 2  | 0. 41068   | coding    |
| MSTRG. 4463. 1  | -1. 52139  | noncoding |
| MSTRG. 4464. 1  | -1. 34233  | noncoding |
| MSTRG. 4465. 1  | -2. 62557  | noncoding |
| MSTRG. 4467. 4  | 0. 869763  | coding    |
| MSTRG. 4470. 3  | 1. 77665   | coding    |
| MSTRG. 4470. 4  | 1. 76417   | coding    |
| MSTRG. 4470. 5  | 1. 61758   | coding    |

|                 |            |           |
|-----------------|------------|-----------|
| MSTRG. 4473. 3  | 1. 1901    | coding    |
| MSTRG. 4471. 2  | -0. 970134 | noncoding |
| MSTRG. 4471. 1  | -0. 998812 | noncoding |
| MSTRG. 4474. 5  | 1. 72684   | coding    |
| MSTRG. 4474. 4  | 2. 66315   | coding    |
| MSTRG. 4474. 7  | 1. 10229   | coding    |
| MSTRG. 4474. 8  | 0. 405757  | coding    |
| MSTRG. 4474. 10 | 0. 861798  | coding    |
| MSTRG. 4474. 12 | 0. 723222  | coding    |
| MSTRG. 4474. 13 | 0. 882241  | coding    |
| MSTRG. 4474. 14 | 0. 844484  | coding    |
| MSTRG. 4474. 11 | 0. 804488  | coding    |
| MSTRG. 4479. 6  | -1. 57178  | noncoding |
| MSTRG. 4479. 4  | -0. 151699 | noncoding |
| MSTRG. 4479. 7  | 0. 083984  | coding    |
| MSTRG. 4479. 2  | -0. 015055 | noncoding |
| MSTRG. 4479. 1  | -0. 680447 | noncoding |
| MSTRG. 4480. 2  | 0. 481393  | coding    |
| MSTRG. 4481. 4  | 0. 445926  | coding    |
| MSTRG. 4481. 5  | 0. 340038  | coding    |
| MSTRG. 4481. 1  | 0. 36219   | coding    |
| MSTRG. 4481. 2  | 0. 389515  | coding    |
| MSTRG. 4477. 2  | 1. 86023   | coding    |
| MSTRG. 4477. 3  | 1. 82452   | coding    |
| MSTRG. 4477. 4  | 1. 89699   | coding    |
| MSTRG. 4487. 1  | 1. 96092   | coding    |
| MSTRG. 4488. 1  | 0. 038143  | coding    |
| MSTRG. 4488. 2  | 0. 028399  | coding    |
| MSTRG. 4488. 3  | -0. 879282 | noncoding |
| MSTRG. 4494. 1  | 0. 960461  | coding    |
| MSTRG. 4495. 1  | -0. 058049 | noncoding |
| MSTRG. 4494. 8  | 0. 934053  | coding    |
| MSTRG. 4494. 9  | 0. 583965  | coding    |
| MSTRG. 4496. 1  | -1. 05032  | noncoding |
| MSTRG. 4494. 10 | 1. 02235   | coding    |
| MSTRG. 4494. 11 | 0. 40016   | coding    |
| MSTRG. 4498. 1  | -0. 138639 | noncoding |
| MSTRG. 4494. 12 | 1. 0207    | coding    |
| MSTRG. 4494. 13 | -0. 580343 | noncoding |
| MSTRG. 4499. 3  | 1. 25813   | coding    |
| MSTRG. 4483. 6  | 2. 06589   | coding    |
| MSTRG. 4483. 4  | 1. 5552    | coding    |
| MSTRG. 4483. 5  | 2. 15062   | coding    |
| MSTRG. 4483. 3  | 2. 53546   | coding    |
| MSTRG. 4503. 1  | -2. 02165  | noncoding |
| MSTRG. 4504. 5  | 1. 30285   | coding    |
| MSTRG. 4506. 1  | -1. 01925  | noncoding |
| MSTRG. 4515. 1  | 2. 51597   | coding    |
| MSTRG. 4516. 2  | -1. 51265  | noncoding |
| MSTRG. 4516. 1  | -1. 56256  | noncoding |
| MSTRG. 4520. 2  | 1. 75028   | coding    |
| MSTRG. 4520. 4  | 1. 21727   | coding    |
| MSTRG. 4521. 1  | -2. 04995  | noncoding |
| MSTRG. 4533. 11 | -0. 054355 | noncoding |



|                 |            |           |
|-----------------|------------|-----------|
| MSTRG. 4533. 7  | 1. 07218   | coding    |
| MSTRG. 4533. 10 | 1. 11155   | coding    |
| MSTRG. 4533. 3  | 1. 28597   | coding    |
| MSTRG. 4533. 1  | 1. 61664   | coding    |
| MSTRG. 4533. 2  | 1. 63501   | coding    |
| MSTRG. 4533. 4  | 1. 67002   | coding    |
| MSTRG. 4533. 8  | 0. 997163  | coding    |
| MSTRG. 4533. 6  | 0. 886635  | coding    |
| MSTRG. 4533. 5  | 0. 557942  | coding    |
| MSTRG. 4523. 3  | 0. 470538  | coding    |
| MSTRG. 4523. 4  | 0. 318355  | coding    |
| MSTRG. 4524. 1  | -0. 286679 | noncoding |
| MSTRG. 4525. 1  | 0. 259254  | coding    |
| MSTRG. 4538. 1  | -0. 588602 | noncoding |
| MSTRG. 4540. 1  | -0. 221776 | noncoding |
| MSTRG. 4541. 2  | 0. 126384  | coding    |
| MSTRG. 4549. 1  | -1. 39767  | noncoding |
| MSTRG. 4552. 4  | 1. 80895   | coding    |
| MSTRG. 4553. 1  | -0. 101877 | noncoding |
| MSTRG. 4543. 2  | 2. 73612   | coding    |
| MSTRG. 4543. 3  | 2. 85694   | coding    |
| MSTRG. 4562. 2  | 0. 031635  | coding    |
| MSTRG. 4562. 3  | 0. 61317   | coding    |
| MSTRG. 4564. 1  | 2. 13567   | coding    |
| MSTRG. 4555. 2  | 3. 15169   | coding    |
| MSTRG. 4557. 1  | -1. 67236  | noncoding |
| MSTRG. 4559. 3  | -0. 779799 | noncoding |
| MSTRG. 4571. 1  | 0. 370712  | coding    |
| MSTRG. 4572. 1  | -1. 14894  | noncoding |
| MSTRG. 4574. 1  | -0. 769366 | noncoding |
| MSTRG. 4578. 1  | 0. 002777  | coding    |
| MSTRG. 4578. 3  | 0. 109823  | coding    |
| MSTRG. 4579. 2  | 0. 198696  | coding    |
| MSTRG. 4580. 2  | -0. 449019 | noncoding |
| MSTRG. 4592. 1  | 1. 96486   | coding    |
| MSTRG. 4592. 2  | 1. 44529   | coding    |
| MSTRG. 4594. 1  | 1. 33704   | coding    |
| MSTRG. 4594. 2  | 2. 30909   | coding    |
| MSTRG. 4594. 4  | 2. 33633   | coding    |
| MSTRG. 4594. 6  | 1. 20866   | coding    |
| MSTRG. 4594. 5  | 1. 45894   | coding    |
| MSTRG. 4594. 7  | 0. 039477  | coding    |
| MSTRG. 4595. 1  | -2. 14296  | noncoding |
| MSTRG. 4594. 9  | 0. 046998  | coding    |
| MSTRG. 4594. 10 | 1. 30743   | coding    |
| MSTRG. 4594. 11 | 0. 286492  | coding    |
| MSTRG. 4585. 3  | 1. 38666   | coding    |
| MSTRG. 4585. 4  | -1. 92196  | noncoding |
| MSTRG. 4585. 5  | 0. 970397  | coding    |
| MSTRG. 4583. 1  | 0. 63783   | coding    |
| MSTRG. 4588. 1  | -1. 34932  | noncoding |
| MSTRG. 4600. 1  | -0. 389643 | noncoding |
| MSTRG. 4600. 2  | -0. 69714  | noncoding |
| MSTRG. 4600. 3  | -0. 523204 | noncoding |

|                 |            |           |
|-----------------|------------|-----------|
| MSTRG. 4601. 3  | 1. 1764    | coding    |
| MSTRG. 4601. 4  | 1. 34127   | coding    |
| MSTRG. 4602. 1  | 0. 468075  | coding    |
| MSTRG. 4603. 1  | 0. 294809  | coding    |
| MSTRG. 4601. 8  | 1. 62989   | coding    |
| MSTRG. 4601. 9  | 1. 58918   | coding    |
| MSTRG. 4604. 1  | 0. 759302  | coding    |
| MSTRG. 4604. 3  | 0. 289091  | coding    |
| MSTRG. 4605. 7  | 0. 689192  | coding    |
| MSTRG. 4605. 8  | 0. 605531  | coding    |
| MSTRG. 4605. 4  | 1. 39719   | coding    |
| MSTRG. 4605. 6  | 1. 34539   | coding    |
| MSTRG. 4605. 9  | 0. 938843  | coding    |
| MSTRG. 4605. 10 | -0. 227945 | noncoding |
| MSTRG. 4608. 3  | -1. 65155  | noncoding |
| MSTRG. 4608. 6  | 0. 085448  | coding    |
| MSTRG. 4609. 2  | 1. 32859   | coding    |
| MSTRG. 4609. 1  | 1. 93812   | coding    |
| MSTRG. 4611. 1  | -2. 18027  | noncoding |
| MSTRG. 4615. 2  | -1. 48425  | noncoding |
| MSTRG. 4616. 2  | 2. 1377    | coding    |
| MSTRG. 4617. 1  | 1. 06063   | coding    |
| MSTRG. 4618. 1  | 1. 32139   | coding    |
| MSTRG. 4616. 3  | 0. 86137   | coding    |
| MSTRG. 4627. 9  | -0. 299875 | noncoding |
| MSTRG. 4627. 10 | 0. 121214  | coding    |
| MSTRG. 4627. 7  | 0. 135624  | coding    |
| MSTRG. 4620. 2  | 1. 52804   | coding    |
| MSTRG. 4632. 3  | -0. 341528 | noncoding |
| MSTRG. 4634. 9  | 2. 34224   | coding    |
| MSTRG. 4634. 10 | 1. 80336   | coding    |
| MSTRG. 4634. 13 | 2. 07646   | coding    |
| MSTRG. 4706. 9  | 1. 9806    | coding    |
| MSTRG. 4706. 6  | 2. 51      | coding    |
| MSTRG. 4706. 4  | 2. 35225   | coding    |
| MSTRG. 4706. 27 | 2. 2944    | coding    |
| MSTRG. 4706. 18 | 1. 84023   | coding    |
| MSTRG. 4706. 25 | 2. 00625   | coding    |
| MSTRG. 4706. 19 | 2. 32523   | coding    |
| MSTRG. 4706. 12 | 1. 6132    | coding    |
| MSTRG. 4706. 14 | 1. 85062   | coding    |
| MSTRG. 4706. 24 | 2. 24459   | coding    |
| MSTRG. 4706. 16 | 2. 26273   | coding    |
| MSTRG. 4706. 15 | 2. 20472   | coding    |
| MSTRG. 4706. 30 | 0. 978328  | coding    |
| MSTRG. 4706. 31 | -0. 500495 | noncoding |
| MSTRG. 4706. 32 | -0. 141559 | noncoding |
| MSTRG. 4706. 33 | 0. 243293  | coding    |
| MSTRG. 4648. 1  | -0. 576621 | noncoding |
| MSTRG. 4649. 1  | 0. 097845  | coding    |
| MSTRG. 4649. 2  | 0. 355712  | coding    |
| MSTRG. 4651. 1  | 0. 338787  | coding    |
| MSTRG. 4660. 3  | 1. 1991    | coding    |
| MSTRG. 4654. 1  | 0. 150309  | coding    |

|                 |            |           |
|-----------------|------------|-----------|
| MSTRG. 4654. 2  | 0. 128869  | coding    |
| MSTRG. 4666. 1  | 0. 448119  | coding    |
| MSTRG. 4673. 2  | 1. 11489   | coding    |
| MSTRG. 4673. 3  | 0. 572206  | coding    |
| MSTRG. 4675. 2  | 2. 75646   | coding    |
| MSTRG. 4679. 3  | 1. 18655   | coding    |
| MSTRG. 4679. 2  | 1. 25657   | coding    |
| MSTRG. 4679. 5  | 1. 37859   | coding    |
| MSTRG. 4680. 6  | 0. 83761   | coding    |
| MSTRG. 4680. 7  | 1. 14708   | coding    |
| MSTRG. 4680. 8  | -0. 157789 | noncoding |
| MSTRG. 4677. 1  | 0. 116966  | coding    |
| MSTRG. 4677. 4  | 0. 309889  | coding    |
| MSTRG. 4682. 1  | 1. 54543   | coding    |
| MSTRG. 4682. 2  | -0. 215371 | noncoding |
| MSTRG. 4687. 1  | 1. 10546   | coding    |
| MSTRG. 4687. 5  | 1. 00057   | coding    |
| MSTRG. 4687. 4  | 1. 28466   | coding    |
| MSTRG. 4689. 1  | 2. 72849   | coding    |
| MSTRG. 4689. 2  | 2. 2502    | coding    |
| MSTRG. 4691. 1  | -1. 54241  | noncoding |
| MSTRG. 4692. 2  | 1. 73777   | coding    |
| MSTRG. 4698. 1  | -2. 16214  | noncoding |
| MSTRG. 4700. 1  | 0. 171194  | coding    |
| MSTRG. 4701. 1  | 0. 21414   | coding    |
| MSTRG. 4703. 2  | 2. 295     | coding    |
| MSTRG. 4703. 1  | 1. 23315   | coding    |
| MSTRG. 4703. 3  | 0. 461392  | coding    |
| MSTRG. 4704. 1  | -0. 763853 | noncoding |
| MSTRG. 4703. 4  | 2. 0905    | coding    |
| MSTRG. 4718. 3  | 0. 995214  | coding    |
| MSTRG. 4718. 6  | 1. 40213   | coding    |
| MSTRG. 4718. 8  | 0. 582164  | coding    |
| MSTRG. 4705. 2  | -0. 078826 | noncoding |
| MSTRG. 4709. 2  | -1. 77845  | noncoding |
| MSTRG. 4709. 1  | -1. 03651  | noncoding |
| MSTRG. 4711. 4  | 1. 93453   | coding    |
| MSTRG. 4711. 5  | 1. 89426   | coding    |
| MSTRG. 4711. 6  | 1. 93628   | coding    |
| MSTRG. 4710. 1  | 0. 897197  | coding    |
| MSTRG. 4725. 1  | 2. 64337   | coding    |
| MSTRG. 4725. 2  | 2. 44989   | coding    |
| MSTRG. 4725. 12 | -1. 38386  | noncoding |
| MSTRG. 4725. 10 | 2. 79762   | coding    |
| MSTRG. 4725. 11 | 2. 45123   | coding    |
| MSTRG. 4725. 9  | 2. 54536   | coding    |
| MSTRG. 4725. 13 | 2. 63768   | coding    |
| MSTRG. 4725. 16 | 2. 27259   | coding    |
| MSTRG. 4725. 17 | 2. 55605   | coding    |
| MSTRG. 4725. 18 | 2. 66425   | coding    |
| MSTRG. 4725. 19 | 2. 38221   | coding    |
| MSTRG. 4725. 20 | 2. 41886   | coding    |
| MSTRG. 4725. 21 | 2. 3925    | coding    |
| MSTRG. 4725. 22 | 2. 64393   | coding    |

|                |            |           |
|----------------|------------|-----------|
| MSTRG. 4722. 3 | -0. 583516 | noncoding |
| MSTRG. 4729. 1 | 0. 785401  | coding    |
| MSTRG. 4734. 4 | 1. 62752   | coding    |
| MSTRG. 4734. 5 | 1. 77138   | coding    |
| MSTRG. 4735. 1 | -0. 679474 | noncoding |
| MSTRG. 4735. 2 | 0. 641249  | coding    |
| MSTRG. 4730. 1 | -0. 96324  | noncoding |
| MSTRG. 4731. 1 | -1. 11986  | noncoding |
| MSTRG. 4738. 1 | -1. 67828  | noncoding |
| MSTRG. 4741. 2 | 0. 484965  | coding    |
| MSTRG. 4744. 1 | -1. 39702  | noncoding |
| MSTRG. 4746. 1 | -0. 63869  | noncoding |
| MSTRG. 4747. 3 | 1. 98525   | coding    |
| MSTRG. 4750. 1 | -2. 50059  | noncoding |
| MSTRG. 4751. 1 | -2. 24383  | noncoding |
| MSTRG. 4754. 1 | 2. 86679   | coding    |
| MSTRG. 4754. 4 | 2. 88571   | coding    |
| MSTRG. 4754. 5 | 1. 95299   | coding    |
| MSTRG. 4754. 6 | 2. 11531   | coding    |
| MSTRG. 4754. 7 | 2. 07235   | coding    |
| MSTRG. 4752. 1 | 2. 4376    | coding    |
| MSTRG. 4757. 1 | -0. 745369 | noncoding |
| MSTRG. 4758. 2 | 0. 21273   | coding    |
| MSTRG. 4758. 3 | -0. 202972 | noncoding |
| MSTRG. 4761. 1 | 2. 45532   | coding    |
| MSTRG. 4761. 3 | 2. 30894   | coding    |
| MSTRG. 4761. 5 | 2. 30319   | coding    |
| MSTRG. 4762. 1 | -2. 39848  | noncoding |
| MSTRG. 4763. 1 | 0. 347754  | coding    |
| MSTRG. 4767. 2 | 0. 832545  | coding    |
| MSTRG. 4768. 1 | -0. 191071 | noncoding |
| MSTRG. 4767. 6 | 0. 381806  | coding    |
| MSTRG. 4769. 1 | -0. 241183 | noncoding |
| MSTRG. 4767. 7 | 0. 740562  | coding    |
| MSTRG. 4772. 2 | 0. 994402  | coding    |
| MSTRG. 4766. 1 | -1. 68955  | noncoding |
| MSTRG. 4766. 2 | -1. 50023  | noncoding |
| MSTRG. 4766. 3 | -1. 80951  | noncoding |
| MSTRG. 4774. 3 | 0. 131663  | coding    |
| MSTRG. 4774. 2 | 0. 077816  | coding    |
| MSTRG. 4781. 2 | 1. 87477   | coding    |
| MSTRG. 4785. 3 | 2. 5961    | coding    |
| MSTRG. 4785. 6 | 0. 307631  | coding    |
| MSTRG. 4782. 1 | 1. 1777    | coding    |
| MSTRG. 4782. 3 | 1. 23142   | coding    |
| MSTRG. 4787. 1 | 1. 56263   | coding    |
| MSTRG. 4787. 2 | 1. 10543   | coding    |
| MSTRG. 4787. 3 | 1. 60789   | coding    |
| MSTRG. 4788. 1 | -0. 488041 | noncoding |
| MSTRG. 4789. 1 | -1. 26243  | noncoding |
| MSTRG. 4796. 1 | 1. 09648   | coding    |
| MSTRG. 4800. 2 | 1. 30503   | coding    |
| MSTRG. 4811. 1 | -0. 576452 | noncoding |
| MSTRG. 4811. 3 | -0. 469825 | noncoding |

|                 |            |           |
|-----------------|------------|-----------|
| MSTRG. 4813. 1  | 2. 44498   | coding    |
| MSTRG. 4814. 1  | -0. 186429 | noncoding |
| MSTRG. 4815. 1  | -1. 27386  | noncoding |
| MSTRG. 4826. 4  | -0. 154944 | noncoding |
| MSTRG. 4826. 5  | 0. 598648  | coding    |
| MSTRG. 4826. 2  | 0. 672151  | coding    |
| MSTRG. 4826. 3  | 1. 90937   | coding    |
| MSTRG. 4826. 10 | 1. 87271   | coding    |
| MSTRG. 4816. 1  | -1. 2214   | noncoding |
| MSTRG. 4818. 1  | 1. 80188   | coding    |
| MSTRG. 4818. 2  | 1. 33836   | coding    |
| MSTRG. 4818. 4  | 1. 39447   | coding    |
| MSTRG. 4819. 1  | -1. 54917  | noncoding |
| MSTRG. 4830. 2  | 1. 17884   | coding    |
| MSTRG. 4831. 4  | 1. 56463   | coding    |
| MSTRG. 4831. 5  | 1. 63313   | coding    |
| MSTRG. 4836. 1  | 0. 638346  | coding    |
| MSTRG. 4836. 2  | 0. 666351  | coding    |
| MSTRG. 4843. 1  | -2. 29902  | noncoding |
| MSTRG. 4844. 1  | -2. 19693  | noncoding |
| MSTRG. 4848. 1  | -0. 287935 | noncoding |
| MSTRG. 4849. 1  | -0. 785135 | noncoding |
| MSTRG. 4860. 1  | -1. 56581  | noncoding |
| MSTRG. 4861. 1  | 0. 639023  | coding    |
| MSTRG. 4861. 2  | 0. 878339  | coding    |
| MSTRG. 4870. 1  | -1. 21003  | noncoding |
| MSTRG. 4876. 1  | 1. 48621   | coding    |
| MSTRG. 4877. 1  | -0. 818489 | noncoding |
| MSTRG. 4882. 1  | -0. 95241  | noncoding |
| MSTRG. 4882. 2  | -0. 699251 | noncoding |
| MSTRG. 4873. 1  | -1. 84404  | noncoding |
| MSTRG. 4886. 1  | -0. 297773 | noncoding |
| MSTRG. 4887. 1  | 2. 08446   | coding    |
| MSTRG. 4887. 2  | 1. 61345   | coding    |
| MSTRG. 4895. 2  | 0. 495702  | coding    |
| MSTRG. 4903. 1  | -1. 7642   | noncoding |
| MSTRG. 4903. 2  | 0. 750749  | coding    |
| MSTRG. 4921. 2  | 2. 45435   | coding    |
| MSTRG. 4921. 3  | 2. 3763    | coding    |
| MSTRG. 4922. 2  | 0. 944074  | coding    |
| MSTRG. 4924. 1  | -0. 976263 | noncoding |
| MSTRG. 4925. 1  | -1. 3242   | noncoding |
| MSTRG. 4928. 3  | 3. 04929   | coding    |
| MSTRG. 4928. 4  | 2. 10955   | coding    |
| MSTRG. 4929. 1  | -0. 193848 | noncoding |
| MSTRG. 4928. 6  | -0. 506619 | noncoding |
| MSTRG. 4930. 1  | 0. 469602  | coding    |
| MSTRG. 4928. 7  | 2. 59757   | coding    |
| MSTRG. 4912. 2  | 2. 2039    | coding    |
| MSTRG. 4913. 1  | 1. 08697   | coding    |
| MSTRG. 4913. 3  | 0. 753725  | coding    |
| MSTRG. 4913. 4  | 0. 40008   | coding    |
| MSTRG. 4920. 1  | -2. 08779  | noncoding |
| MSTRG. 4942. 1  | -1. 58488  | noncoding |

|                 |           |           |
|-----------------|-----------|-----------|
| MSTRG. 4950. 1  | -0.827621 | noncoding |
| MSTRG. 4951. 2  | -0.894962 | noncoding |
| MSTRG. 4953. 1  | -1.7354   | noncoding |
| MSTRG. 4961. 1  | 2.46204   | coding    |
| MSTRG. 4961. 7  | 2.37195   | coding    |
| MSTRG. 4961. 4  | 2.50215   | coding    |
| MSTRG. 4961. 5  | 2.50048   | coding    |
| MSTRG. 4961. 6  | 2.38802   | coding    |
| MSTRG. 4961. 10 | 2.59437   | coding    |
| MSTRG. 4961. 8  | 2.57847   | coding    |
| MSTRG. 4961. 9  | 2.57812   | coding    |
| MSTRG. 4961. 12 | 1.67335   | coding    |
| MSTRG. 4961. 11 | 2.61511   | coding    |
| MSTRG. 4961. 13 | 2.57827   | coding    |
| MSTRG. 4961. 15 | 2.42657   | coding    |
| MSTRG. 4961. 14 | 2.45845   | coding    |
| MSTRG. 4962. 1  | 0.71304   | coding    |
| MSTRG. 4963. 1  | -0.313426 | noncoding |
| MSTRG. 4964. 1  | -0.348267 | noncoding |
| MSTRG. 4965. 1  | 0.272236  | coding    |
| MSTRG. 4965. 2  | -0.800346 | noncoding |
| MSTRG. 4965. 3  | -1.06203  | noncoding |
| MSTRG. 4966. 1  | -1.8204   | noncoding |
| MSTRG. 4967. 1  | -0.071802 | noncoding |
| MSTRG. 4961. 17 | 0.392404  | coding    |
| MSTRG. 4955. 1  | -0.405962 | noncoding |
| MSTRG. 4956. 1  | -2.31549  | noncoding |
| MSTRG. 4959. 3  | 1.88043   | coding    |
| MSTRG. 4960. 1  | -1.8024   | noncoding |
| MSTRG. 4975. 2  | 0.588088  | coding    |
| MSTRG. 4980. 10 | 1.56138   | coding    |
| MSTRG. 4980. 4  | 1.59954   | coding    |
| MSTRG. 4980. 9  | 1.5867    | coding    |
| MSTRG. 4980. 8  | 1.40023   | coding    |
| MSTRG. 4980. 5  | 1.34674   | coding    |
| MSTRG. 4980. 2  | 1.38077   | coding    |
| MSTRG. 4981. 2  | 1.17096   | coding    |
| MSTRG. 4985. 6  | 0.893932  | coding    |
| MSTRG. 4985. 8  | 1.48684   | coding    |
| MSTRG. 4990. 3  | 0.465858  | coding    |
| MSTRG. 4990. 4  | -1.11752  | noncoding |
| MSTRG. 4991. 1  | -0.277312 | noncoding |
| MSTRG. 4998. 3  | 3.07381   | coding    |
| MSTRG. 4998. 4  | 1.71917   | coding    |
| MSTRG. 4998. 5  | 1.70501   | coding    |
| MSTRG. 4998. 6  | 0.315122  | coding    |
| MSTRG. 4998. 7  | -2.43907  | noncoding |
| MSTRG. 4988. 6  | 1.44197   | coding    |
| MSTRG. 5003. 1  | -0.898296 | noncoding |
| MSTRG. 5020. 1  | -1.78351  | noncoding |
| MSTRG. 5021. 2  | 0.717924  | coding    |
| MSTRG. 5046. 1  | -2.50636  | noncoding |
| MSTRG. 5052. 1  | -1.17627  | noncoding |
| MSTRG. 5077. 2  | 1.49542   | coding    |

|                 |            |           |
|-----------------|------------|-----------|
| MSTRG. 5077. 3  | 1. 75177   | coding    |
| MSTRG. 5078. 1  | -0. 98832  | noncoding |
| MSTRG. 5106. 1  | -2. 18026  | noncoding |
| MSTRG. 5095. 2  | -0. 831139 | noncoding |
| MSTRG. 5137. 1  | 1. 63744   | coding    |
| MSTRG. 5138. 1  | -1. 25893  | noncoding |
| MSTRG. 5137. 3  | 0. 478507  | coding    |
| MSTRG. 5137. 2  | 1. 18023   | coding    |
| MSTRG. 5137. 4  | 2. 43088   | coding    |
| MSTRG. 5137. 5  | 0. 136862  | coding    |
| MSTRG. 5137. 6  | -0. 616466 | noncoding |
| MSTRG. 5140. 2  | -0. 962928 | noncoding |
| MSTRG. 5137. 7  | 2. 23186   | coding    |
| MSTRG. 5137. 8  | 2. 29789   | coding    |
| MSTRG. 5137. 10 | -0. 642907 | noncoding |
| MSTRG. 5133. 1  | 3. 05708   | coding    |
| MSTRG. 5133. 3  | 2. 26903   | coding    |
| MSTRG. 5133. 4  | -1. 76662  | noncoding |
| MSTRG. 5134. 1  | 0. 330835  | coding    |
| MSTRG. 5135. 1  | -0. 605569 | noncoding |
| MSTRG. 5160. 1  | 0. 21432   | coding    |
| MSTRG. 5192. 2  | 1. 05297   | coding    |
| MSTRG. 5192. 1  | 1. 17252   | coding    |
| MSTRG. 5192. 3  | -1. 10684  | noncoding |
| MSTRG. 5192. 4  | -1. 19094  | noncoding |
| MSTRG. 5196. 1  | -2. 58327  | noncoding |
| MSTRG. 5201. 1  | -1. 48568  | noncoding |
| MSTRG. 5209. 1  | -2. 05909  | noncoding |
| MSTRG. 5236. 1  | 2. 56434   | coding    |
| MSTRG. 5236. 3  | 3. 00685   | coding    |
| MSTRG. 5237. 1  | 0. 047593  | coding    |
| MSTRG. 5236. 6  | 2. 27158   | coding    |
| MSTRG. 5238. 5  | 0. 532506  | coding    |
| MSTRG. 5217. 3  | 1. 22527   | coding    |
| MSTRG. 5217. 4  | 1. 36096   | coding    |
| MSTRG. 5218. 1  | -0. 177317 | noncoding |
| MSTRG. 5226. 1  | -0. 619982 | noncoding |
| MSTRG. 5247. 1  | 0. 907751  | coding    |
| MSTRG. 5249. 2  | 1. 10304   | coding    |
| MSTRG. 5249. 3  | 1. 27554   | coding    |
| MSTRG. 5249. 4  | 1. 05552   | coding    |
| MSTRG. 5250. 1  | -1. 11365  | noncoding |
| MSTRG. 5250. 2  | 0. 471657  | coding    |
| MSTRG. 5232. 1  | 0. 896916  | coding    |
| MSTRG. 5240. 3  | -0. 12767  | noncoding |
| MSTRG. 5252. 4  | 0. 442984  | coding    |
| MSTRG. 5252. 3  | 1. 68339   | coding    |
| MSTRG. 5252. 10 | -0. 124387 | noncoding |
| MSTRG. 5256. 1  | -3. 18703  | noncoding |
| MSTRG. 5257. 1  | 1. 67708   | coding    |
| MSTRG. 5257. 3  | 0. 242962  | coding    |
| MSTRG. 5257. 5  | 1. 07996   | coding    |
| MSTRG. 5257. 6  | 1. 21498   | coding    |
| MSTRG. 5258. 1  | -1. 67864  | noncoding |

|                |            |           |
|----------------|------------|-----------|
| MSTRG. 5260. 1 | 0. 691982  | coding    |
| MSTRG. 5261. 4 | 0. 720267  | coding    |
| MSTRG. 5261. 5 | 1. 14226   | coding    |
| MSTRG. 5265. 1 | -1. 89995  | noncoding |
| MSTRG. 5254. 1 | -0. 948682 | noncoding |
| MSTRG. 5285. 2 | 1. 91529   | coding    |
| MSTRG. 5285. 3 | 1. 85622   | coding    |
| MSTRG. 5285. 4 | 2. 22641   | coding    |
| MSTRG. 5286. 1 | -2. 00227  | noncoding |
| MSTRG. 5285. 5 | 1. 96519   | coding    |
| MSTRG. 5288. 2 | 0. 999292  | coding    |
| MSTRG. 5289. 1 | -0. 627237 | noncoding |
| MSTRG. 5293. 1 | 2. 93573   | coding    |
| MSTRG. 5297. 5 | -0. 67287  | noncoding |
| MSTRG. 5298. 1 | 0. 132147  | coding    |
| MSTRG. 5297. 6 | 0. 569839  | coding    |
| MSTRG. 5297. 7 | -1. 94266  | noncoding |
| MSTRG. 5297. 8 | -2. 03835  | noncoding |
| MSTRG. 5299. 3 | -0. 447095 | noncoding |
| MSTRG. 5300. 1 | -0. 745447 | noncoding |
| MSTRG. 5301. 1 | 1. 20468   | coding    |
| MSTRG. 5301. 2 | -0. 067373 | noncoding |
| MSTRG. 5301. 4 | 0. 745241  | coding    |
| MSTRG. 5301. 8 | 0. 721923  | coding    |
| MSTRG. 5301. 7 | 0. 911727  | coding    |
| MSTRG. 5301. 3 | 0. 810148  | coding    |
| MSTRG. 5301. 6 | 0. 923672  | coding    |
| MSTRG. 5301. 5 | 1. 35408   | coding    |
| MSTRG. 5305. 1 | 0. 315207  | coding    |
| MSTRG. 5305. 2 | -0. 266721 | noncoding |
| MSTRG. 5306. 1 | -0. 844227 | noncoding |
| MSTRG. 5307. 1 | -0. 802801 | noncoding |
| MSTRG. 5271. 1 | -2. 03547  | noncoding |
| MSTRG. 5275. 1 | -0. 058496 | noncoding |
| MSTRG. 5275. 2 | -0. 565762 | noncoding |
| MSTRG. 5276. 2 | 1. 71664   | coding    |
| MSTRG. 5283. 2 | 2. 47291   | coding    |
| MSTRG. 5283. 3 | -0. 368121 | noncoding |
| MSTRG. 5284. 1 | -0. 745116 | noncoding |
| MSTRG. 5310. 2 | 1. 95889   | coding    |
| MSTRG. 5310. 3 | 1. 98286   | coding    |
| MSTRG. 5312. 1 | -1. 2227   | noncoding |
| MSTRG. 5317. 1 | -0. 244775 | noncoding |
| MSTRG. 5324. 1 | 0. 612172  | coding    |
| MSTRG. 5324. 2 | 1. 2346    | coding    |
| MSTRG. 5324. 3 | -0. 444068 | noncoding |
| MSTRG. 5331. 1 | 0. 259695  | coding    |
| MSTRG. 5358. 2 | -1. 28919  | noncoding |
| MSTRG. 5359. 2 | 0. 256599  | coding    |
| MSTRG. 5359. 3 | -0. 220586 | noncoding |
| MSTRG. 5363. 2 | 1. 08786   | coding    |
| MSTRG. 5363. 4 | 1. 11149   | coding    |
| MSTRG. 5363. 5 | 0. 070036  | coding    |
| MSTRG. 5365. 2 | 1. 65263   | coding    |



|                |            |           |
|----------------|------------|-----------|
| MSTRG. 5354. 2 | 2. 92261   | coding    |
| MSTRG. 5354. 3 | 0. 830786  | coding    |
| MSTRG. 5370. 2 | -0. 958257 | noncoding |
| MSTRG. 5382. 1 | -0. 124813 | noncoding |
| MSTRG. 5384. 1 | -1. 03573  | noncoding |
| MSTRG. 5383. 7 | 1. 49317   | coding    |
| MSTRG. 5385. 2 | -0. 617408 | noncoding |
| MSTRG. 5386. 1 | 1. 41225   | coding    |
| MSTRG. 5386. 3 | 1. 42742   | coding    |
| MSTRG. 5386. 4 | 2. 03925   | coding    |
| MSTRG. 5386. 5 | 2. 08668   | coding    |
| MSTRG. 5386. 7 | 2. 12298   | coding    |
| MSTRG. 5386. 9 | -0. 965783 | noncoding |
| MSTRG. 5387. 1 | 0. 458991  | coding    |
| MSTRG. 5388. 1 | 0. 22796   | coding    |
| MSTRG. 5389. 1 | 0. 143306  | coding    |
| MSTRG. 5391. 1 | 0. 208096  | coding    |
| MSTRG. 5377. 3 | 1. 33432   | coding    |
| MSTRG. 5377. 2 | 1. 30244   | coding    |
| MSTRG. 5377. 1 | 1. 60416   | coding    |
| MSTRG. 5392. 1 | 1. 05324   | coding    |
| MSTRG. 5392. 2 | 1. 23237   | coding    |
| MSTRG. 5393. 2 | 2. 36161   | coding    |
| MSTRG. 5401. 3 | -1. 1393   | noncoding |
| MSTRG. 5401. 2 | -1. 07199  | noncoding |
| MSTRG. 5401. 1 | -1. 77963  | noncoding |
| MSTRG. 5402. 3 | 2. 33004   | coding    |
| MSTRG. 5402. 4 | 0. 137703  | coding    |
| MSTRG. 5403. 1 | -3. 18703  | noncoding |
| MSTRG. 5404. 2 | 1. 76398   | coding    |
| MSTRG. 5404. 1 | 1. 21355   | coding    |
| MSTRG. 5404. 3 | 1. 91038   | coding    |
| MSTRG. 5405. 1 | -1. 89122  | noncoding |
| MSTRG. 5404. 4 | -0. 895976 | noncoding |
| MSTRG. 5408. 4 | 0. 851652  | coding    |
| MSTRG. 5399. 1 | 1. 26623   | coding    |
| MSTRG. 5399. 2 | 1. 18149   | coding    |
| MSTRG. 5412. 1 | 0. 866101  | coding    |
| MSTRG. 5413. 2 | 2. 60761   | coding    |
| MSTRG. 5414. 1 | -2. 22326  | noncoding |
| MSTRG. 5416. 3 | 1. 22749   | coding    |
| MSTRG. 5417. 1 | -0. 231196 | noncoding |
| MSTRG. 5419. 7 | 0. 94061   | coding    |
| MSTRG. 5419. 6 | 0. 65531   | coding    |
| MSTRG. 5419. 8 | 0. 778468  | coding    |
| MSTRG. 5440. 1 | -0. 76562  | noncoding |
| MSTRG. 5445. 2 | -0. 163065 | noncoding |
| MSTRG. 5491. 1 | -0. 341199 | noncoding |
| MSTRG. 5493. 1 | 0. 31383   | coding    |
| MSTRG. 5493. 2 | 1. 29377   | coding    |
| MSTRG. 5470. 2 | 1. 78596   | coding    |
| MSTRG. 5471. 1 | -1. 10087  | noncoding |
| MSTRG. 5478. 3 | 2. 5486    | coding    |
| MSTRG. 5480. 1 | 0. 384913  | coding    |

|                |            |           |
|----------------|------------|-----------|
| MSTRG. 5514. 1 | 2. 28915   | coding    |
| MSTRG. 5515. 1 | -2. 23597  | noncoding |
| MSTRG. 5558. 2 | 0. 62193   | coding    |
| MSTRG. 5560. 1 | -0. 797004 | noncoding |
| MSTRG. 5561. 1 | -1. 09249  | noncoding |
| MSTRG. 5561. 2 | -0. 572512 | noncoding |
| MSTRG. 5562. 1 | 0. 175331  | coding    |
| MSTRG. 5563. 1 | 0. 315476  | coding    |
| MSTRG. 5564. 1 | -0. 704821 | noncoding |
| MSTRG. 5565. 1 | -2. 07214  | noncoding |
| MSTRG. 5558. 3 | -1. 27894  | noncoding |
| MSTRG. 5532. 1 | 0. 511852  | coding    |
| MSTRG. 5533. 1 | 1. 00184   | coding    |
| MSTRG. 5533. 2 | 1. 29348   | coding    |
| MSTRG. 5539. 1 | -1. 0099   | noncoding |
| MSTRG. 5540. 1 | 0. 232227  | coding    |
| MSTRG. 5538. 4 | -1. 16249  | noncoding |
| MSTRG. 5543. 1 | 0. 434707  | coding    |
| MSTRG. 5543. 4 | 0. 448784  | coding    |
| MSTRG. 5543. 2 | 0. 828744  | coding    |
| MSTRG. 5543. 3 | 0. 85739   | coding    |
| MSTRG. 5543. 7 | 1. 64345   | coding    |
| MSTRG. 5543. 8 | 0. 554965  | coding    |
| MSTRG. 5543. 9 | 0. 738707  | coding    |
| MSTRG. 5549. 1 | -2. 2504   | noncoding |
| MSTRG. 5550. 2 | 1. 9999    | coding    |
| MSTRG. 5552. 1 | -1. 15396  | noncoding |
| MSTRG. 5555. 4 | 1. 66496   | coding    |
| MSTRG. 5555. 2 | 1. 22515   | coding    |
| MSTRG. 5555. 3 | 1. 92392   | coding    |
| MSTRG. 5570. 2 | 1. 87653   | coding    |
| MSTRG. 5570. 4 | 1. 58917   | coding    |
| MSTRG. 5572. 2 | 0. 047024  | coding    |
| MSTRG. 5574. 5 | 0. 589872  | coding    |
| MSTRG. 5574. 6 | 0. 667876  | coding    |
| MSTRG. 5574. 7 | -0. 668536 | noncoding |
| MSTRG. 5575. 3 | 1. 65448   | coding    |
| MSTRG. 5575. 4 | 1. 08522   | coding    |
| MSTRG. 5584. 1 | 0. 088022  | coding    |
| MSTRG. 5591. 1 | 1. 48394   | coding    |
| MSTRG. 5591. 2 | 1. 61285   | coding    |
| MSTRG. 5595. 3 | 0. 21965   | coding    |
| MSTRG. 5594. 1 | -1. 43966  | noncoding |
| MSTRG. 5605. 2 | 0. 20406   | coding    |
| MSTRG. 5606. 2 | -1. 70286  | noncoding |
| MSTRG. 5608. 1 | -2. 12021  | noncoding |
| MSTRG. 5610. 3 | 1. 92952   | coding    |
| MSTRG. 5615. 1 | 0. 139098  | coding    |
| MSTRG. 5618. 3 | 0. 332239  | coding    |
| MSTRG. 5612. 1 | 1. 54827   | coding    |
| MSTRG. 5627. 1 | 0. 463229  | coding    |
| MSTRG. 5628. 1 | -2. 06809  | noncoding |
| MSTRG. 5629. 1 | -0. 260036 | noncoding |
| MSTRG. 5629. 2 | -0. 846277 | noncoding |

|                 |            |           |
|-----------------|------------|-----------|
| MSTRG. 5627. 3  | 1. 12864   | coding    |
| MSTRG. 5627. 4  | -0. 290779 | noncoding |
| MSTRG. 5627. 5  | 0. 266685  | coding    |
| MSTRG. 5627. 6  | -0. 144927 | noncoding |
| MSTRG. 5627. 7  | 0. 253887  | coding    |
| MSTRG. 5627. 8  | 0. 245193  | coding    |
| MSTRG. 5627. 9  | 0. 147403  | coding    |
| MSTRG. 5627. 10 | -0. 084388 | noncoding |
| MSTRG. 5627. 11 | -0. 089462 | noncoding |
| MSTRG. 5627. 12 | -0. 101658 | noncoding |
| MSTRG. 5627. 13 | -0. 165727 | noncoding |
| MSTRG. 5627. 14 | 0. 151397  | coding    |
| MSTRG. 5631. 1  | 0. 666924  | coding    |
| MSTRG. 5632. 1  | 0. 56425   | coding    |
| MSTRG. 5633. 1  | 0. 118913  | coding    |
| MSTRG. 5633. 2  | -0. 186515 | noncoding |
| MSTRG. 5634. 1  | -0. 866138 | noncoding |
| MSTRG. 5632. 2  | 1. 04055   | coding    |
| MSTRG. 5634. 2  | -0. 706813 | noncoding |
| MSTRG. 5635. 3  | 1. 88616   | coding    |
| MSTRG. 5636. 1  | -0. 259439 | noncoding |
| MSTRG. 5621. 2  | 0. 339493  | coding    |
| MSTRG. 5624. 1  | -0. 024809 | noncoding |
| MSTRG. 5624. 2  | -0. 732706 | noncoding |
| MSTRG. 5638. 1  | -0. 238119 | noncoding |
| MSTRG. 5643. 3  | 1. 32765   | coding    |
| MSTRG. 5642. 4  | 0. 479446  | coding    |
| MSTRG. 5642. 5  | -0. 211907 | noncoding |
| MSTRG. 5661. 1  | 0. 395401  | coding    |
| MSTRG. 5668. 3  | -0. 639251 | noncoding |
| MSTRG. 5669. 3  | 2. 64457   | coding    |
| MSTRG. 5669. 4  | 1. 21538   | coding    |
| MSTRG. 5669. 5  | 2. 20714   | coding    |
| MSTRG. 5670. 1  | -1. 12055  | noncoding |
| MSTRG. 5671. 1  | -0. 199888 | noncoding |
| MSTRG. 5672. 1  | -2. 82071  | noncoding |
| MSTRG. 5667. 1  | -0. 884786 | noncoding |
| MSTRG. 5681. 1  | 1. 32926   | coding    |
| MSTRG. 5681. 5  | 1. 54757   | coding    |
| MSTRG. 5681. 10 | 0. 225224  | coding    |
| MSTRG. 5681. 7  | 1. 1443    | coding    |
| MSTRG. 5681. 11 | -0. 509072 | noncoding |
| MSTRG. 5722. 15 | 1. 02697   | coding    |
| MSTRG. 5726. 1  | -1. 0034   | noncoding |
| MSTRG. 5726. 2  | -0. 035273 | noncoding |
| MSTRG. 5722. 17 | -2. 27885  | noncoding |
| MSTRG. 5722. 18 | -0. 4714   | noncoding |
| MSTRG. 5727. 1  | 0. 441304  | coding    |
| MSTRG. 5728. 1  | 0. 047445  | coding    |
| MSTRG. 5729. 1  | -1. 33542  | noncoding |
| MSTRG. 5730. 4  | -0. 37706  | noncoding |
| MSTRG. 5722. 19 | 1. 27504   | coding    |
| MSTRG. 5722. 20 | 0. 673064  | coding    |
| MSTRG. 5722. 21 | 1. 01093   | coding    |

|                 |            |           |
|-----------------|------------|-----------|
| MSTRG. 5734. 1  | -0. 344201 | noncoding |
| MSTRG. 5722. 22 | 0. 928892  | coding    |
| MSTRG. 5687. 2  | 2. 14848   | coding    |
| MSTRG. 5690. 2  | -0. 077181 | noncoding |
| MSTRG. 5690. 3  | -0. 171    | noncoding |
| MSTRG. 5695. 3  | 0. 452546  | coding    |
| MSTRG. 5696. 1  | -0. 839665 | noncoding |
| MSTRG. 5695. 5  | 0. 809823  | coding    |
| MSTRG. 5695. 6  | 0. 829719  | coding    |
| MSTRG. 5693. 1  | -1. 07488  | noncoding |
| MSTRG. 5699. 1  | -1. 21682  | noncoding |
| MSTRG. 5704. 3  | 1. 43794   | coding    |
| MSTRG. 5707. 14 | 0. 876979  | coding    |
| MSTRG. 5707. 17 | 0. 403488  | coding    |
| MSTRG. 5707. 15 | 1. 42379   | coding    |
| MSTRG. 5707. 11 | 1. 54339   | coding    |
| MSTRG. 5707. 13 | 1. 32613   | coding    |
| MSTRG. 5707. 16 | 1. 55437   | coding    |
| MSTRG. 5707. 6  | 1. 83165   | coding    |
| MSTRG. 5707. 2  | 1. 82546   | coding    |
| MSTRG. 5707. 5  | 1. 67268   | coding    |
| MSTRG. 5707. 9  | 1. 86309   | coding    |
| MSTRG. 5711. 3  | 0. 7369    | coding    |
| MSTRG. 5713. 3  | 1. 52576   | coding    |
| MSTRG. 5713. 4  | 1. 79964   | coding    |
| MSTRG. 5713. 6  | 1. 36129   | coding    |
| MSTRG. 5713. 5  | 1. 76496   | coding    |
| MSTRG. 5717. 2  | 0. 676783  | coding    |
| MSTRG. 5717. 1  | 2. 67447   | coding    |
| MSTRG. 5717. 3  | 0. 614792  | coding    |
| MSTRG. 5717. 4  | 3. 07013   | coding    |
| MSTRG. 5717. 5  | 2. 55714   | coding    |
| MSTRG. 5715. 4  | 0. 889713  | coding    |
| MSTRG. 5715. 3  | 0. 573449  | coding    |
| MSTRG. 5716. 1  | 0. 846041  | coding    |
| MSTRG. 5740. 3  | 1. 15943   | coding    |
| MSTRG. 5742. 1  | -1. 75697  | noncoding |
| MSTRG. 5745. 3  | 0. 423439  | coding    |
| MSTRG. 5745. 2  | 0. 992124  | coding    |
| MSTRG. 5746. 8  | 0. 490379  | coding    |
| MSTRG. 5746. 9  | 0. 36331   | coding    |
| MSTRG. 5747. 1  | 0. 303013  | coding    |
| MSTRG. 5746. 10 | 1. 79443   | coding    |
| MSTRG. 5782. 1  | -0. 869068 | noncoding |
| MSTRG. 5757. 2  | -0. 741757 | noncoding |
| MSTRG. 5757. 1  | -0. 445258 | noncoding |
| MSTRG. 5761. 1  | 1. 38589   | coding    |
| MSTRG. 5761. 2  | 1. 42733   | coding    |
| MSTRG. 5763. 2  | 0. 765747  | coding    |
| MSTRG. 5762. 1  | -1. 59533  | noncoding |
| MSTRG. 5835. 1  | -0. 504264 | noncoding |
| MSTRG. 5835. 2  | -0. 080399 | noncoding |
| MSTRG. 5835. 3  | 0. 534263  | coding    |
| MSTRG. 5835. 4  | 0. 206524  | coding    |

|                 |            |           |
|-----------------|------------|-----------|
| MSTRG. 5835. 5  | 0. 51429   | coding    |
| MSTRG. 5835. 6  | 0. 706678  | coding    |
| MSTRG. 5835. 7  | 0. 597038  | coding    |
| MSTRG. 5835. 9  | -0. 563663 | noncoding |
| MSTRG. 5836. 1  | -0. 151222 | noncoding |
| MSTRG. 5835. 11 | 0. 43907   | coding    |
| MSTRG. 5837. 1  | 0. 158341  | coding    |
| MSTRG. 5838. 1  | -0. 709228 | noncoding |
| MSTRG. 5835. 13 | -0. 979762 | noncoding |
| MSTRG. 5835. 12 | -0. 281543 | noncoding |
| MSTRG. 5835. 14 | -0. 307646 | noncoding |
| MSTRG. 5835. 15 | -0. 265341 | noncoding |
| MSTRG. 5835. 16 | -0. 144055 | noncoding |
| MSTRG. 5835. 17 | 0. 112509  | coding    |
| MSTRG. 5835. 18 | -0. 154395 | noncoding |
| MSTRG. 5835. 20 | 0. 041199  | coding    |
| MSTRG. 5835. 22 | -0. 135561 | noncoding |
| MSTRG. 5835. 23 | 0. 426861  | coding    |
| MSTRG. 5835. 25 | 0. 390773  | coding    |
| MSTRG. 5835. 26 | 0. 446906  | coding    |
| MSTRG. 5835. 27 | 0. 396558  | coding    |
| MSTRG. 5835. 28 | -0. 568941 | noncoding |
| MSTRG. 5835. 29 | 0. 699365  | coding    |
| MSTRG. 5835. 30 | 0. 494213  | coding    |
| MSTRG. 5840. 1  | 0. 059089  | coding    |
| MSTRG. 5797. 1  | 2. 55222   | coding    |
| MSTRG. 5797. 6  | 1. 87657   | coding    |
| MSTRG. 5797. 4  | 2. 26468   | coding    |
| MSTRG. 5797. 3  | 2. 28294   | coding    |
| MSTRG. 5797. 5  | 2. 29601   | coding    |
| MSTRG. 5797. 7  | 1. 99481   | coding    |
| MSTRG. 5798. 1  | 0. 785622  | coding    |
| MSTRG. 5802. 3  | -0. 114973 | noncoding |
| MSTRG. 5803. 1  | -0. 313423 | noncoding |
| MSTRG. 5805. 1  | 0. 969503  | coding    |
| MSTRG. 5799. 1  | -2. 49953  | noncoding |
| MSTRG. 5815. 1  | -1. 58523  | noncoding |
| MSTRG. 5832. 1  | -2. 12448  | noncoding |
| MSTRG. 5834. 1  | 2. 29024   | coding    |
| MSTRG. 5845. 3  | 2. 35714   | coding    |
| MSTRG. 5845. 4  | 1. 56492   | coding    |
| MSTRG. 5856. 2  | 0. 908192  | coding    |
| MSTRG. 5858. 1  | -1. 57777  | noncoding |
| MSTRG. 5860. 1  | -0. 474872 | noncoding |
| MSTRG. 5862. 1  | 0. 859244  | coding    |
| MSTRG. 5864. 1  | 2. 96157   | coding    |
| MSTRG. 5865. 1  | -0. 120419 | noncoding |
| MSTRG. 5866. 1  | -1. 59679  | noncoding |
| MSTRG. 5867. 1  | -0. 811984 | noncoding |
| MSTRG. 5872. 5  | 0. 985301  | coding    |
| MSTRG. 5873. 1  | -1. 3264   | noncoding |
| MSTRG. 5874. 2  | 0. 969184  | coding    |
| MSTRG. 5874. 3  | 0. 244579  | coding    |
| MSTRG. 5874. 5  | 0. 588331  | coding    |

|                |            |           |
|----------------|------------|-----------|
| MSTRG. 5874. 4 | 1. 04195   | coding    |
| MSTRG. 5877. 1 | 1. 80699   | coding    |
| MSTRG. 5879. 1 | -0. 3614   | noncoding |
| MSTRG. 5885. 2 | 1. 69121   | coding    |
| MSTRG. 5886. 1 | -2. 13852  | noncoding |
| MSTRG. 5890. 2 | 2. 18674   | coding    |
| MSTRG. 5890. 3 | 1. 30881   | coding    |
| MSTRG. 5891. 1 | 1. 8728    | coding    |
| MSTRG. 5891. 2 | 1. 96477   | coding    |
| MSTRG. 5891. 3 | 1. 88114   | coding    |
| MSTRG. 5896. 2 | 0. 430766  | coding    |
| MSTRG. 5897. 1 | 0. 536012  | coding    |
| MSTRG. 5901. 1 | 0. 143689  | coding    |
| MSTRG. 5904. 1 | 1. 32856   | coding    |
| MSTRG. 5904. 2 | 0. 539359  | coding    |
| MSTRG. 5904. 4 | 1. 46636   | coding    |
| MSTRG. 5907. 1 | 1. 87411   | coding    |
| MSTRG. 5908. 1 | -1. 07975  | noncoding |
| MSTRG. 5908. 2 | -1. 38417  | noncoding |
| MSTRG. 5907. 3 | 1. 52947   | coding    |
| MSTRG. 5907. 4 | 1. 49683   | coding    |
| MSTRG. 5909. 2 | 2. 00317   | coding    |
| MSTRG. 5909. 3 | 2. 01699   | coding    |
| MSTRG. 5909. 4 | 0. 026369  | coding    |
| MSTRG. 5910. 1 | 1. 32136   | coding    |
| MSTRG. 5915. 1 | 1. 48367   | coding    |
| MSTRG. 5915. 4 | 0. 006288  | coding    |
| MSTRG. 5915. 3 | 1. 81812   | coding    |
| MSTRG. 5916. 1 | 0. 911205  | coding    |
| MSTRG. 5917. 2 | 1. 10401   | coding    |
| MSTRG. 5918. 1 | -2. 70897  | noncoding |
| MSTRG. 5919. 1 | 0. 574522  | coding    |
| MSTRG. 5920. 1 | 0. 567176  | coding    |
| MSTRG. 5924. 1 | -1. 06316  | noncoding |
| MSTRG. 5924. 6 | 1. 17662   | coding    |
| MSTRG. 5924. 7 | 0. 401897  | coding    |
| MSTRG. 5924. 8 | 1. 51542   | coding    |
| MSTRG. 5921. 1 | -1. 44236  | noncoding |
| MSTRG. 5922. 3 | -0. 781375 | noncoding |
| MSTRG. 5922. 4 | 0. 038071  | coding    |
| MSTRG. 5923. 1 | 0. 29305   | coding    |
| MSTRG. 5925. 1 | 0. 64266   | coding    |
| MSTRG. 5925. 2 | 0. 366808  | coding    |
| MSTRG. 5925. 4 | 0. 550971  | coding    |
| MSTRG. 5925. 3 | 0. 613038  | coding    |
| MSTRG. 5925. 5 | 0. 341599  | coding    |
| MSTRG. 5927. 1 | 0. 605252  | coding    |
| MSTRG. 5927. 2 | 0. 358486  | coding    |
| MSTRG. 5932. 1 | -0. 264882 | noncoding |
| MSTRG. 5934. 1 | 0. 892325  | coding    |
| MSTRG. 5934. 3 | 2. 08179   | coding    |
| MSTRG. 5934. 4 | 2. 09018   | coding    |
| MSTRG. 5935. 2 | 0. 879689  | coding    |
| MSTRG. 5936. 1 | 1. 73125   | coding    |

|                |            |           |
|----------------|------------|-----------|
| MSTRG. 5939. 1 | -1. 53688  | noncoding |
| MSTRG. 5940. 1 | -1. 56392  | noncoding |
| MSTRG. 5940. 2 | -0. 750676 | noncoding |
| MSTRG. 5939. 2 | -1. 69487  | noncoding |
| MSTRG. 5940. 4 | -1. 26472  | noncoding |
| MSTRG. 5939. 3 | -0. 736114 | noncoding |
| MSTRG. 5939. 4 | -1. 33175  | noncoding |
| MSTRG. 5940. 5 | -1. 4436   | noncoding |
| MSTRG. 5942. 1 | -1. 94901  | noncoding |
| MSTRG. 5944. 1 | -0. 275771 | noncoding |
| MSTRG. 5945. 1 | -2. 15655  | noncoding |
| MSTRG. 5946. 1 | -0. 796347 | noncoding |
| MSTRG. 5945. 2 | -2. 12813  | noncoding |
| MSTRG. 5949. 2 | -0. 02672  | noncoding |
| MSTRG. 5966. 1 | -1. 87108  | noncoding |
| MSTRG. 5965. 5 | 1. 26354   | coding    |
| MSTRG. 5969. 1 | -0. 632531 | noncoding |
| MSTRG. 5965. 6 | 0. 232923  | coding    |
| MSTRG. 5965. 7 | -0. 302402 | noncoding |
| MSTRG. 5965. 8 | 1. 1112    | coding    |
| MSTRG. 5970. 1 | -2. 12634  | noncoding |
| MSTRG. 5972. 1 | -1. 01761  | noncoding |
| MSTRG. 5951. 1 | -0. 965524 | noncoding |
| MSTRG. 5953. 1 | -1. 47868  | noncoding |
| MSTRG. 5955. 2 | 0. 953614  | coding    |
| MSTRG. 5956. 3 | 0. 675295  | coding    |
| MSTRG. 5956. 2 | 0. 385045  | coding    |
| MSTRG. 5956. 4 | -1. 13788  | noncoding |
| MSTRG. 5958. 1 | 0. 476349  | coding    |
| MSTRG. 5956. 6 | 1. 57154   | coding    |
| MSTRG. 5956. 7 | 1. 1392    | coding    |
| MSTRG. 5959. 1 | 0. 251207  | coding    |
| MSTRG. 5960. 1 | -0. 649132 | noncoding |
| MSTRG. 5961. 1 | -0. 427081 | noncoding |
| MSTRG. 5962. 1 | 0. 333415  | coding    |
| MSTRG. 5956. 8 | 0. 489383  | coding    |
| MSTRG. 5985. 4 | 1. 22611   | coding    |
| MSTRG. 5985. 7 | 1. 58041   | coding    |
| MSTRG. 5985. 5 | 1. 34871   | coding    |
| MSTRG. 5985. 8 | 0. 450851  | coding    |
| MSTRG. 5986. 1 | -0. 084625 | noncoding |
| MSTRG. 5989. 1 | -0. 302737 | noncoding |
| MSTRG. 5990. 2 | 0. 42311   | coding    |
| MSTRG. 5989. 4 | -0. 022483 | noncoding |
| MSTRG. 5984. 1 | -0. 239835 | noncoding |
| MSTRG. 5991. 1 | 1. 17933   | coding    |
| MSTRG. 5991. 3 | -0. 838248 | noncoding |
| MSTRG. 5992. 1 | 0. 738039  | coding    |
| MSTRG. 5994. 1 | -1. 01408  | noncoding |
| MSTRG. 5995. 1 | 0. 214792  | coding    |
| MSTRG. 5997. 1 | -2. 18521  | noncoding |
| MSTRG. 5999. 1 | -1. 11885  | noncoding |
| MSTRG. 6004. 5 | 0. 38378   | coding    |
| MSTRG. 6004. 4 | 0. 4536    | coding    |

|                 |            |           |
|-----------------|------------|-----------|
| MSTRG. 6005. 1  | 0. 439392  | coding    |
| MSTRG. 6006. 1  | -0. 266169 | noncoding |
| MSTRG. 6004. 7  | 0. 711434  | coding    |
| MSTRG. 6007. 1  | -0. 214203 | noncoding |
| MSTRG. 6008. 1  | 0. 400186  | coding    |
| MSTRG. 6008. 2  | -1. 11376  | noncoding |
| MSTRG. 6009. 3  | 2. 24458   | coding    |
| MSTRG. 6001. 2  | -1. 34603  | noncoding |
| MSTRG. 6010. 2  | 2. 22589   | coding    |
| MSTRG. 6020. 4  | 2. 30702   | coding    |
| MSTRG. 6029. 2  | -0. 204686 | noncoding |
| MSTRG. 6029. 3  | -0. 477374 | noncoding |
| MSTRG. 6029. 4  | 1. 19155   | coding    |
| MSTRG. 6030. 1  | -0. 687513 | noncoding |
| MSTRG. 6033. 2  | -0. 773159 | noncoding |
| MSTRG. 6035. 1  | 0. 597853  | coding    |
| MSTRG. 6036. 2  | 2. 46682   | coding    |
| MSTRG. 6036. 3  | 2. 1541    | coding    |
| MSTRG. 6037. 1  | -0. 379999 | noncoding |
| MSTRG. 6040. 1  | 1. 65239   | coding    |
| MSTRG. 6040. 2  | 1. 63115   | coding    |
| MSTRG. 6040. 3  | 1. 64413   | coding    |
| MSTRG. 6040. 5  | 2. 32945   | coding    |
| MSTRG. 6040. 4  | 2. 32239   | coding    |
| MSTRG. 6040. 6  | 1. 65966   | coding    |
| MSTRG. 6040. 7  | 1. 21093   | coding    |
| MSTRG. 6040. 8  | 1. 40868   | coding    |
| MSTRG. 6040. 9  | 0. 987621  | coding    |
| MSTRG. 6040. 10 | 0. 876255  | coding    |
| MSTRG. 6040. 11 | 1. 10564   | coding    |
| MSTRG. 6042. 1  | 1. 2817    | coding    |
| MSTRG. 6043. 3  | 2. 43853   | coding    |
| MSTRG. 6045. 2  | 2. 93279   | coding    |
| MSTRG. 6050. 1  | 1. 89844   | coding    |
| MSTRG. 6050. 3  | 1. 37503   | coding    |
| MSTRG. 6050. 4  | 1. 81902   | coding    |
| MSTRG. 6050. 7  | 0. 542826  | coding    |
| MSTRG. 6056. 1  | 1. 71067   | coding    |
| MSTRG. 6058. 1  | 0. 32911   | coding    |
| MSTRG. 6058. 2  | 0. 404734  | coding    |
| MSTRG. 6060. 3  | -0. 134515 | noncoding |
| MSTRG. 6060. 2  | 0. 277832  | coding    |
| MSTRG. 6061. 2  | 1. 40945   | coding    |
| MSTRG. 6061. 4  | 0. 958642  | coding    |
| MSTRG. 6061. 5  | -0. 021499 | noncoding |
| MSTRG. 6061. 6  | 1. 24793   | coding    |
| MSTRG. 6061. 7  | 1. 6787    | coding    |
| MSTRG. 6061. 10 | 2. 00624   | coding    |
| MSTRG. 6061. 11 | 1. 99829   | coding    |
| MSTRG. 6061. 12 | 1. 98047   | coding    |
| MSTRG. 6061. 9  | 1. 92672   | coding    |
| MSTRG. 6062. 1  | -1. 8502   | noncoding |
| MSTRG. 6063. 1  | 0. 205299  | coding    |
| MSTRG. 6055. 2  | -0. 715843 | noncoding |



|                 |            |           |
|-----------------|------------|-----------|
| MSTRG. 6055. 3  | -0. 928853 | noncoding |
| MSTRG. 6065. 2  | -1. 09628  | noncoding |
| MSTRG. 6066. 1  | -0. 94164  | noncoding |
| MSTRG. 6067. 2  | 0. 996758  | coding    |
| MSTRG. 6068. 2  | 1. 01549   | coding    |
| MSTRG. 6073. 1  | -0. 43795  | noncoding |
| MSTRG. 6074. 1  | -2. 74804  | noncoding |
| MSTRG. 6075. 1  | 1. 63544   | coding    |
| MSTRG. 6076. 1  | 0. 754453  | coding    |
| MSTRG. 6077. 1  | -0. 259194 | noncoding |
| MSTRG. 6077. 2  | 0. 121446  | coding    |
| MSTRG. 6088. 1  | 0. 738905  | coding    |
| MSTRG. 6088. 5  | 0. 12214   | coding    |
| MSTRG. 6089. 2  | 0. 539915  | coding    |
| MSTRG. 6089. 3  | 0. 752847  | coding    |
| MSTRG. 6096. 1  | -2. 1787   | noncoding |
| MSTRG. 6100. 1  | 0. 327074  | coding    |
| MSTRG. 6104. 1  | -0. 266972 | noncoding |
| MSTRG. 6105. 1  | -0. 552272 | noncoding |
| MSTRG. 6112. 1  | 0. 177377  | coding    |
| MSTRG. 6113. 1  | -1. 64635  | noncoding |
| MSTRG. 6121. 3  | 2. 6703    | coding    |
| MSTRG. 6121. 5  | 2. 46617   | coding    |
| MSTRG. 6121. 7  | 2. 60851   | coding    |
| MSTRG. 6121. 9  | 2. 40239   | coding    |
| MSTRG. 6121. 10 | 2. 37265   | coding    |
| MSTRG. 6119. 1  | 1. 04604   | coding    |
| MSTRG. 6119. 3  | 1. 04533   | coding    |
| MSTRG. 6124. 3  | 1. 80167   | coding    |
| MSTRG. 6125. 2  | 1. 17518   | coding    |
| MSTRG. 6125. 3  | 1. 22583   | coding    |
| MSTRG. 6125. 4  | 1. 13608   | coding    |
| MSTRG. 6130. 4  | 1. 74223   | coding    |
| MSTRG. 6127. 1  | -1. 90045  | noncoding |
| MSTRG. 6133. 1  | -1. 33551  | noncoding |
| MSTRG. 6133. 2  | -1. 59262  | noncoding |
| MSTRG. 6134. 1  | -1. 28898  | noncoding |
| MSTRG. 6136. 1  | -0. 916014 | noncoding |
| MSTRG. 6136. 2  | 0. 312462  | coding    |
| MSTRG. 6139. 6  | 2. 42935   | coding    |
| MSTRG. 6140. 2  | -0. 028136 | noncoding |
| MSTRG. 6141. 2  | 1. 69483   | coding    |
| MSTRG. 6143. 1  | 1. 28492   | coding    |
| MSTRG. 6145. 3  | 0. 162567  | coding    |
| MSTRG. 6149. 1  | 0. 384631  | coding    |
| MSTRG. 6154. 3  | 0. 748785  | coding    |
| MSTRG. 6163. 1  | 1. 29246   | coding    |
| MSTRG. 6163. 2  | 1. 20229   | coding    |
| MSTRG. 6163. 4  | 1. 63249   | coding    |
| MSTRG. 6163. 5  | 1. 5757    | coding    |
| MSTRG. 6161. 2  | 1. 80841   | coding    |
| MSTRG. 6161. 3  | 2. 43408   | coding    |
| MSTRG. 6167. 1  | 1. 91345   | coding    |
| MSTRG. 6167. 3  | 1. 74294   | coding    |

|                 |            |           |
|-----------------|------------|-----------|
| MSTRG. 6169. 2  | 1. 94394   | coding    |
| MSTRG. 6170. 1  | -0. 392894 | noncoding |
| MSTRG. 6171. 1  | -0. 02957  | noncoding |
| MSTRG. 6171. 2  | -0. 314228 | noncoding |
| MSTRG. 6173. 2  | -0. 032328 | noncoding |
| MSTRG. 6173. 3  | 0. 440092  | coding    |
| MSTRG. 6174. 7  | 1. 34675   | coding    |
| MSTRG. 6174. 1  | 1. 16727   | coding    |
| MSTRG. 6174. 6  | 1. 24723   | coding    |
| MSTRG. 6174. 9  | -1. 753    | noncoding |
| MSTRG. 6174. 10 | -1. 93162  | noncoding |
| MSTRG. 6186. 2  | 1. 7835    | coding    |
| MSTRG. 6190. 2  | 2. 44363   | coding    |
| MSTRG. 6190. 1  | 2. 44944   | coding    |
| MSTRG. 6190. 10 | 2. 09571   | coding    |
| MSTRG. 6190. 11 | 2. 00454   | coding    |
| MSTRG. 6190. 15 | 2. 0006    | coding    |
| MSTRG. 6190. 12 | 2. 02623   | coding    |
| MSTRG. 6190. 5  | 2. 03464   | coding    |
| MSTRG. 6190. 14 | 2. 18802   | coding    |
| MSTRG. 6190. 9  | 2. 30087   | coding    |
| MSTRG. 6190. 6  | 2. 31423   | coding    |
| MSTRG. 6190. 4  | 2. 32204   | coding    |
| MSTRG. 6190. 8  | 2. 31728   | coding    |
| MSTRG. 6190. 17 | 2. 61813   | coding    |
| MSTRG. 6192. 1  | 0. 066605  | coding    |
| MSTRG. 6193. 1  | 0. 360664  | coding    |
| MSTRG. 6179. 1  | -0. 703733 | noncoding |
| MSTRG. 6179. 2  | -0. 453159 | noncoding |
| MSTRG. 6180. 6  | 0. 577757  | coding    |
| MSTRG. 6180. 7  | 0. 903988  | coding    |
| MSTRG. 6180. 5  | 0. 514986  | coding    |
| MSTRG. 6180. 2  | 0. 4952    | coding    |
| MSTRG. 6180. 4  | 0. 551409  | coding    |
| MSTRG. 6180. 8  | 0. 587699  | coding    |
| MSTRG. 6181. 1  | -0. 058554 | noncoding |
| MSTRG. 6181. 2  | 0. 334089  | coding    |
| MSTRG. 6180. 10 | 0. 802078  | coding    |
| MSTRG. 6180. 11 | 0. 874901  | coding    |
| MSTRG. 6180. 9  | 0. 876294  | coding    |
| MSTRG. 6182. 1  | -1. 17263  | noncoding |
| MSTRG. 6184. 1  | -0. 295844 | noncoding |
| MSTRG. 6196. 1  | -2. 37372  | noncoding |
| MSTRG. 6201. 1  | 0. 901595  | coding    |
| MSTRG. 6204. 2  | 2. 33045   | coding    |
| MSTRG. 6204. 3  | 1. 21353   | coding    |
| MSTRG. 6206. 1  | -1. 91943  | noncoding |
| MSTRG. 6212. 1  | 0. 915892  | coding    |
| MSTRG. 6212. 2  | 1. 04225   | coding    |
| MSTRG. 6212. 3  | 0. 497558  | coding    |
| MSTRG. 6212. 8  | 0. 402664  | coding    |
| MSTRG. 6220. 1  | -2. 30845  | noncoding |
| MSTRG. 6222. 3  | 0. 535584  | coding    |
| MSTRG. 6222. 4  | 0. 208722  | coding    |

|                |           |           |
|----------------|-----------|-----------|
| MSTRG. 6223. 1 | -0.066404 | noncoding |
| MSTRG. 6231. 1 | 1.72557   | coding    |
| MSTRG. 6232. 2 | 2.23166   | coding    |
| MSTRG. 6232. 4 | 1.76865   | coding    |
| MSTRG. 6233. 1 | -1.41113  | noncoding |
| MSTRG. 6233. 2 | -0.837419 | noncoding |
| MSTRG. 6235. 5 | 0.360247  | coding    |
| MSTRG. 6235. 4 | 0.771564  | coding    |
| MSTRG. 6235. 6 | 0.362116  | coding    |
| MSTRG. 6235. 7 | 0.912828  | coding    |
| MSTRG. 6235. 8 | 0.985332  | coding    |
| MSTRG. 6235. 9 | 1.13573   | coding    |
| MSTRG. 6238. 2 | 2.6337    | coding    |
| MSTRG. 6240. 1 | -0.862211 | noncoding |
| MSTRG. 6238. 3 | -0.506529 | noncoding |
| MSTRG. 6242. 1 | 0.525897  | coding    |
| MSTRG. 6237. 2 | -0.333081 | noncoding |
| MSTRG. 6237. 3 | 0.389652  | coding    |
| MSTRG. 6237. 4 | 0.905507  | coding    |
| MSTRG. 6237. 5 | 0.950207  | coding    |
| MSTRG. 6251. 1 | 1.08496   | coding    |
| MSTRG. 6251. 2 | 1.18039   | coding    |
| MSTRG. 6251. 3 | 0.66163   | coding    |
| MSTRG. 6251. 4 | 0.420791  | coding    |
| MSTRG. 6251. 5 | 0.792577  | coding    |
| MSTRG. 6251. 7 | 1.49475   | coding    |
| MSTRG. 6251. 8 | 0.170933  | coding    |
| MSTRG. 6252. 1 | 0.783956  | coding    |
| MSTRG. 6253. 1 | 1.16307   | coding    |
| MSTRG. 6253. 2 | 1.16251   | coding    |
| MSTRG. 6253. 3 | 1.15731   | coding    |
| MSTRG. 6253. 5 | 1.46737   | coding    |
| MSTRG. 6248. 1 | -0.113327 | noncoding |
| MSTRG. 6267. 3 | -0.70239  | noncoding |
| MSTRG. 6271. 1 | 3.53306   | coding    |
| MSTRG. 6271. 3 | 3.63338   | coding    |
| MSTRG. 6272. 1 | 0.821437  | coding    |
| MSTRG. 6273. 2 | 1.03076   | coding    |
| MSTRG. 6273. 3 | 1.37076   | coding    |
| MSTRG. 6274. 2 | -0.978854 | noncoding |
| MSTRG. 6285. 1 | -1.78036  | noncoding |
| MSTRG. 6288. 1 | -1.65036  | noncoding |
| MSTRG. 6312. 1 | 1.68874   | coding    |
| MSTRG. 6312. 2 | 2.22574   | coding    |
| MSTRG. 6314. 1 | -0.611442 | noncoding |
| MSTRG. 6312. 8 | 1.04405   | coding    |
| MSTRG. 6315. 1 | 0.527548  | coding    |
| MSTRG. 6316. 1 | -0.388743 | noncoding |
| MSTRG. 6314. 2 | 0.183051  | coding    |
| MSTRG. 6314. 3 | -0.284595 | noncoding |
| MSTRG. 6314. 4 | -0.374624 | noncoding |
| MSTRG. 6317. 1 | -1.37643  | noncoding |
| MSTRG. 6316. 2 | 0.428965  | coding    |
| MSTRG. 6318. 1 | -0.318532 | noncoding |

|                |            |           |
|----------------|------------|-----------|
| MSTRG. 6316. 3 | -1. 45958  | noncoding |
| MSTRG. 6316. 4 | -1. 70551  | noncoding |
| MSTRG. 6316. 5 | 0. 084375  | coding    |
| MSTRG. 6316. 6 | -0. 401493 | noncoding |
| MSTRG. 6319. 1 | -2. 26498  | noncoding |
| MSTRG. 6319. 2 | -2. 24943  | noncoding |
| MSTRG. 6319. 3 | -2. 58374  | noncoding |
| MSTRG. 6320. 1 | -1. 32894  | noncoding |
| MSTRG. 6323. 2 | 0. 513986  | coding    |
| MSTRG. 6308. 4 | 1. 74087   | coding    |
| MSTRG. 6327. 1 | 2. 06099   | coding    |
| MSTRG. 6328. 1 | -0. 40463  | noncoding |
| MSTRG. 6332. 2 | 0. 309458  | coding    |
| MSTRG. 6332. 3 | 1. 02682   | coding    |
| MSTRG. 6333. 1 | -1. 17044  | noncoding |
| MSTRG. 6334. 2 | 0. 482219  | coding    |
| MSTRG. 6348. 1 | -1. 85982  | noncoding |
| MSTRG. 6348. 2 | -0. 708157 | noncoding |
| MSTRG. 6349. 2 | 1. 30268   | coding    |
| MSTRG. 6349. 1 | 1. 92175   | coding    |
| MSTRG. 6349. 3 | 1. 93679   | coding    |
| MSTRG. 6349. 4 | 1. 93812   | coding    |
| MSTRG. 6349. 5 | 1. 34811   | coding    |
| MSTRG. 6349. 6 | 1. 41678   | coding    |
| MSTRG. 6349. 7 | 1. 3803    | coding    |
| MSTRG. 6349. 8 | 1. 92842   | coding    |
| MSTRG. 6350. 1 | -0. 007752 | noncoding |
| MSTRG. 6351. 1 | 0. 616627  | coding    |
| MSTRG. 6351. 3 | 2. 59558   | coding    |
| MSTRG. 6355. 5 | 0. 633525  | coding    |
| MSTRG. 6355. 4 | 2. 12213   | coding    |
| MSTRG. 6356. 1 | 0. 404853  | coding    |
| MSTRG. 6357. 1 | -0. 920992 | noncoding |
| MSTRG. 6355. 6 | -0. 138233 | noncoding |
| MSTRG. 6358. 1 | 1. 06975   | coding    |
| MSTRG. 6359. 1 | 0. 481943  | coding    |
| MSTRG. 6359. 2 | 0. 038041  | coding    |
| MSTRG. 6355. 7 | 1. 66688   | coding    |
| MSTRG. 6360. 1 | -0. 674269 | noncoding |
| MSTRG. 6363. 1 | 2. 4411    | coding    |
| MSTRG. 6364. 1 | 0. 611842  | coding    |
| MSTRG. 6384. 1 | -0. 49442  | noncoding |
| MSTRG. 6385. 1 | -0. 921763 | noncoding |
| MSTRG. 6386. 1 | -0. 701485 | noncoding |
| MSTRG. 6387. 1 | 0. 814409  | coding    |
| MSTRG. 6388. 1 | 0. 45678   | coding    |
| MSTRG. 6389. 1 | 0. 794306  | coding    |
| MSTRG. 6389. 2 | 0. 637921  | coding    |
| MSTRG. 6389. 3 | -0. 057978 | noncoding |
| MSTRG. 6383. 2 | 1. 80621   | coding    |
| MSTRG. 6383. 3 | 1. 57196   | coding    |
| MSTRG. 6383. 4 | 0. 160243  | coding    |
| MSTRG. 6379. 1 | -1. 78191  | noncoding |
| MSTRG. 6391. 1 | -0. 010082 | noncoding |

|                 |            |           |
|-----------------|------------|-----------|
| MSTRG. 6404. 2  | 1. 50325   | coding    |
| MSTRG. 6404. 3  | 1. 31312   | coding    |
| MSTRG. 6433. 11 | 1. 59009   | coding    |
| MSTRG. 6433. 12 | 1. 15      | coding    |
| MSTRG. 6433. 15 | 1. 31298   | coding    |
| MSTRG. 6433. 3  | 1. 68691   | coding    |
| MSTRG. 6433. 4  | 0. 949154  | coding    |
| MSTRG. 6433. 5  | 0. 757214  | coding    |
| MSTRG. 6433. 6  | 1. 21805   | coding    |
| MSTRG. 6433. 8  | 1. 02063   | coding    |
| MSTRG. 6433. 13 | 1. 28419   | coding    |
| MSTRG. 6433. 10 | 1. 55239   | coding    |
| MSTRG. 6433. 14 | 1. 31864   | coding    |
| MSTRG. 6433. 16 | 2. 02042   | coding    |
| MSTRG. 6433. 7  | 1. 31188   | coding    |
| MSTRG. 6433. 9  | 1. 36479   | coding    |
| MSTRG. 6435. 2  | 1. 54057   | coding    |
| MSTRG. 6436. 2  | 0. 629455  | coding    |
| MSTRG. 6430. 2  | 1. 10798   | coding    |
| MSTRG. 6442. 1  | 0. 409711  | coding    |
| MSTRG. 6454. 2  | 1. 44596   | coding    |
| MSTRG. 6456. 1  | -1. 71581  | noncoding |
| MSTRG. 6456. 2  | -1. 60895  | noncoding |
| MSTRG. 6457. 4  | 1. 31882   | coding    |
| MSTRG. 6457. 2  | 1. 04505   | coding    |
| MSTRG. 6457. 3  | 1. 35158   | coding    |
| MSTRG. 6457. 5  | 1. 04715   | coding    |
| MSTRG. 6464. 3  | 0. 590184  | coding    |
| MSTRG. 6478. 1  | 1. 38427   | coding    |
| MSTRG. 6497. 2  | 1. 09685   | coding    |
| MSTRG. 6497. 3  | 1. 89727   | coding    |
| MSTRG. 6497. 4  | 2. 98274   | coding    |
| MSTRG. 6497. 5  | 2. 47832   | coding    |
| MSTRG. 6497. 6  | 2. 50675   | coding    |
| MSTRG. 6497. 7  | 2. 09189   | coding    |
| MSTRG. 6497. 9  | 0. 284349  | coding    |
| MSTRG. 6497. 10 | 0. 433011  | coding    |
| MSTRG. 6497. 11 | 1. 65007   | coding    |
| MSTRG. 6501. 1  | 0. 986191  | coding    |
| MSTRG. 6501. 2  | 0. 967411  | coding    |
| MSTRG. 6501. 3  | 0. 145153  | coding    |
| MSTRG. 6501. 4  | 1. 06848   | coding    |
| MSTRG. 6501. 5  | 1. 07554   | coding    |
| MSTRG. 6501. 6  | 0. 32428   | coding    |
| MSTRG. 6501. 7  | -0. 604668 | noncoding |
| MSTRG. 6501. 8  | 0. 87352   | coding    |
| MSTRG. 6502. 4  | 1. 38397   | coding    |
| MSTRG. 6503. 1  | 2. 21364   | coding    |
| MSTRG. 6487. 2  | 1. 95324   | coding    |
| MSTRG. 6487. 1  | 2. 06353   | coding    |
| MSTRG. 6487. 3  | 2. 26411   | coding    |
| MSTRG. 6489. 1  | -0. 565874 | noncoding |
| MSTRG. 6494. 1  | 0. 371593  | coding    |
| MSTRG. 6496. 2  | -0. 283234 | noncoding |

|                 |            |           |
|-----------------|------------|-----------|
| MSTRG. 6505. 2  | 0. 333403  | coding    |
| MSTRG. 6507. 1  | -0. 115707 | noncoding |
| MSTRG. 6507. 2  | -0. 11598  | noncoding |
| MSTRG. 6508. 2  | 0. 207148  | coding    |
| MSTRG. 6513. 1  | 0. 30012   | coding    |
| MSTRG. 6513. 2  | 0. 222016  | coding    |
| MSTRG. 6515. 1  | -0. 192041 | noncoding |
| MSTRG. 6520. 1  | 0. 321128  | coding    |
| MSTRG. 6522. 3  | 0. 692181  | coding    |
| MSTRG. 6522. 4  | 0. 829096  | coding    |
| MSTRG. 6530. 1  | 0. 112548  | coding    |
| MSTRG. 6530. 2  | 0. 46359   | coding    |
| MSTRG. 6530. 7  | 0. 845646  | coding    |
| MSTRG. 6530. 11 | 0. 620463  | coding    |
| MSTRG. 6530. 13 | -0. 253929 | noncoding |
| MSTRG. 6530. 12 | 0. 684224  | coding    |
| MSTRG. 6530. 14 | 1. 88793   | coding    |
| MSTRG. 6530. 15 | -0. 431624 | noncoding |
| MSTRG. 6524. 1  | 1. 21101   | coding    |
| MSTRG. 6524. 2  | 1. 63362   | coding    |
| MSTRG. 6524. 3  | 1. 5721    | coding    |
| MSTRG. 6524. 6  | 1. 29732   | coding    |
| MSTRG. 6524. 7  | 1. 65658   | coding    |
| MSTRG. 6524. 8  | 0. 930089  | coding    |
| MSTRG. 6526. 1  | 0. 542896  | coding    |
| MSTRG. 6527. 2  | 1. 13903   | coding    |
| MSTRG. 6527. 3  | 0. 677385  | coding    |
| MSTRG. 6538. 3  | 1. 53583   | coding    |
| MSTRG. 6544. 1  | 2. 56784   | coding    |
| MSTRG. 6544. 3  | 2. 54835   | coding    |
| MSTRG. 6540. 2  | 0. 949008  | coding    |
| MSTRG. 6546. 1  | 2. 28159   | coding    |
| MSTRG. 6550. 2  | 1. 01058   | coding    |
| MSTRG. 6550. 3  | 1. 07462   | coding    |
| MSTRG. 6550. 5  | 0. 957156  | coding    |
| MSTRG. 6550. 6  | 1. 01675   | coding    |
| MSTRG. 6551. 1  | 0. 239759  | coding    |
| MSTRG. 6551. 2  | 0. 551979  | coding    |
| MSTRG. 6551. 3  | 0. 081962  | coding    |
| MSTRG. 6554. 1  | 1. 70194   | coding    |
| MSTRG. 6555. 1  | -1. 41316  | noncoding |
| MSTRG. 6562. 1  | 3. 13665   | coding    |
| MSTRG. 6562. 3  | 0. 895554  | coding    |
| MSTRG. 6568. 1  | -1. 48673  | noncoding |
| MSTRG. 6567. 6  | -1. 35132  | noncoding |
| MSTRG. 6564. 2  | -0. 89377  | noncoding |
| MSTRG. 6564. 3  | -0. 011093 | noncoding |
| MSTRG. 6577. 3  | 2. 64678   | coding    |
| MSTRG. 6577. 2  | 2. 76425   | coding    |
| MSTRG. 6582. 3  | 1. 72786   | coding    |
| MSTRG. 6582. 2  | 1. 50526   | coding    |
| MSTRG. 6582. 1  | 1. 79045   | coding    |
| MSTRG. 6582. 4  | 1. 95624   | coding    |
| MSTRG. 6585. 1  | -0. 823185 | noncoding |

|                 |           |           |
|-----------------|-----------|-----------|
| MSTRG. 6587. 1  | -1.68926  | noncoding |
| MSTRG. 6589. 2  | 0.58708   | coding    |
| MSTRG. 6591. 2  | 1.21736   | coding    |
| MSTRG. 6591. 3  | 1.03515   | coding    |
| MSTRG. 6592. 1  | -0.550624 | noncoding |
| MSTRG. 6592. 2  | -0.230462 | noncoding |
| MSTRG. 6594. 2  | 0.477605  | coding    |
| MSTRG. 6594. 3  | 0.7239    | coding    |
| MSTRG. 6598. 1  | -1.26854  | noncoding |
| MSTRG. 6601. 4  | -0.96825  | noncoding |
| MSTRG. 6605. 1  | 1.84107   | coding    |
| MSTRG. 6606. 2  | 1.68915   | coding    |
| MSTRG. 6614. 1  | -0.479571 | noncoding |
| MSTRG. 6614. 2  | 0.293598  | coding    |
| MSTRG. 6612. 3  | 1.38338   | coding    |
| MSTRG. 6624. 2  | 1.86848   | coding    |
| MSTRG. 6624. 3  | 2.15985   | coding    |
| MSTRG. 6624. 4  | 1.08227   | coding    |
| MSTRG. 6624. 5  | 1.41387   | coding    |
| MSTRG. 6624. 7  | 1.59267   | coding    |
| MSTRG. 6624. 6  | 1.18459   | coding    |
| MSTRG. 6624. 8  | 1.79537   | coding    |
| MSTRG. 6624. 9  | 1.22721   | coding    |
| MSTRG. 6624. 10 | 1.44514   | coding    |
| MSTRG. 6624. 11 | 2.38355   | coding    |
| MSTRG. 6626. 1  | -2.42587  | noncoding |
| MSTRG. 6627. 1  | 2.00234   | coding    |
| MSTRG. 6627. 2  | 2.03923   | coding    |
| MSTRG. 6627. 3  | 1.55782   | coding    |
| MSTRG. 6627. 4  | 1.89859   | coding    |
| MSTRG. 6627. 5  | 1.68043   | coding    |
| MSTRG. 6627. 6  | 1.7041    | coding    |
| MSTRG. 6627. 7  | 2.08628   | coding    |
| MSTRG. 6622. 2  | 2.44436   | coding    |
| MSTRG. 6622. 3  | -1.65105  | noncoding |
| MSTRG. 6622. 4  | 2.34908   | coding    |
| MSTRG. 6633. 1  | 2.43056   | coding    |
| MSTRG. 6633. 2  | 2.4239    | coding    |
| MSTRG. 6633. 7  | 1.91815   | coding    |
| MSTRG. 6633. 5  | 2.46429   | coding    |
| MSTRG. 6634. 2  | 0.6147    | coding    |
| MSTRG. 6629. 2  | 0.807152  | coding    |
| MSTRG. 6636. 3  | 0.715586  | coding    |
| MSTRG. 6636. 4  | 0.941334  | coding    |
| MSTRG. 6636. 5  | 0.882415  | coding    |
| MSTRG. 6636. 6  | 0.700787  | coding    |
| MSTRG. 6638. 2  | 1.83938   | coding    |
| MSTRG. 6639. 2  | -1.1219   | noncoding |
| MSTRG. 6639. 3  | -1.34462  | noncoding |
| MSTRG. 6640. 3  | 0.159626  | coding    |
| MSTRG. 6640. 4  | 0.9552    | coding    |
| MSTRG. 6644. 4  | 0.918768  | coding    |
| MSTRG. 6644. 6  | 1.02071   | coding    |
| MSTRG. 6644. 7  | 1.07719   | coding    |

|                |            |           |
|----------------|------------|-----------|
| MSTRG. 6644. 8 | 0. 852893  | coding    |
| MSTRG. 6652. 1 | -0. 744089 | noncoding |
| MSTRG. 6660. 1 | 1. 33609   | coding    |
| MSTRG. 6660. 2 | 0. 329415  | coding    |
| MSTRG. 6660. 5 | 0. 919631  | coding    |
| MSTRG. 6661. 5 | 2. 18309   | coding    |
| MSTRG. 6661. 7 | 2. 09954   | coding    |
| MSTRG. 6661. 3 | 2. 15107   | coding    |
| MSTRG. 6662. 6 | 0. 833704  | coding    |
| MSTRG. 6662. 7 | 0. 932678  | coding    |
| MSTRG. 6657. 1 | 1. 19296   | coding    |
| MSTRG. 6670. 1 | -0. 115383 | noncoding |
| MSTRG. 6681. 1 | -0. 212097 | noncoding |
| MSTRG. 6682. 1 | 1. 04837   | coding    |
| MSTRG. 6685. 1 | 0. 550905  | coding    |
| MSTRG. 6678. 2 | -2. 32728  | noncoding |
| MSTRG. 6698. 1 | -1. 1016   | noncoding |
| MSTRG. 6705. 1 | 0. 354709  | coding    |
| MSTRG. 6708. 1 | -0. 517417 | noncoding |
| MSTRG. 6709. 1 | -1. 54759  | noncoding |
| MSTRG. 6710. 1 | -0. 655943 | noncoding |
| MSTRG. 6707. 3 | 1. 87838   | coding    |
| MSTRG. 6707. 4 | 1. 87717   | coding    |
| MSTRG. 6711. 1 | -0. 805489 | noncoding |
| MSTRG. 6713. 1 | -2. 54251  | noncoding |
| MSTRG. 6714. 1 | -0. 345371 | noncoding |
| MSTRG. 6714. 2 | -2. 0128   | noncoding |
| MSTRG. 6714. 3 | -0. 621024 | noncoding |
| MSTRG. 6714. 4 | -1. 16919  | noncoding |
| MSTRG. 6714. 5 | -1. 89418  | noncoding |
| MSTRG. 6715. 1 | -0. 228466 | noncoding |
| MSTRG. 6694. 1 | -1. 18958  | noncoding |
| MSTRG. 6694. 2 | 0. 095025  | coding    |
| MSTRG. 6695. 1 | -0. 25673  | noncoding |
| MSTRG. 6694. 3 | -0. 282142 | noncoding |
| MSTRG. 6694. 4 | -0. 64711  | noncoding |
| MSTRG. 6726. 2 | 1. 91553   | coding    |
| MSTRG. 6739. 2 | 0. 628515  | coding    |
| MSTRG. 6739. 4 | -1. 77935  | noncoding |
| MSTRG. 6740. 2 | 0. 261069  | coding    |
| MSTRG. 6741. 3 | 0. 891049  | coding    |
| MSTRG. 6741. 4 | 0. 636773  | coding    |
| MSTRG. 6741. 5 | 0. 706367  | coding    |
| MSTRG. 6744. 1 | 0. 03652   | coding    |
| MSTRG. 6744. 2 | -0. 262455 | noncoding |
| MSTRG. 6748. 3 | 0. 15125   | coding    |
| MSTRG. 6750. 2 | 0. 697005  | coding    |
| MSTRG. 6756. 1 | -0. 288279 | noncoding |
| MSTRG. 6757. 1 | 0. 802618  | coding    |
| MSTRG. 6760. 1 | -0. 100738 | noncoding |
| MSTRG. 6762. 1 | 1. 23916   | coding    |
| MSTRG. 6763. 1 | -1. 5417   | noncoding |
| MSTRG. 6761. 4 | 0. 645552  | coding    |
| MSTRG. 6761. 5 | 0. 607144  | coding    |



|                 |            |           |
|-----------------|------------|-----------|
| MSTRG. 6761. 6  | 0. 822942  | coding    |
| MSTRG. 6764. 1  | -1. 58839  | noncoding |
| MSTRG. 6774. 1  | -0. 069479 | noncoding |
| MSTRG. 6775. 1  | -0. 162982 | noncoding |
| MSTRG. 6776. 1  | 1. 33226   | coding    |
| MSTRG. 6777. 1  | -0. 260642 | noncoding |
| MSTRG. 6776. 2  | -1. 75548  | noncoding |
| MSTRG. 6777. 2  | -0. 829226 | noncoding |
| MSTRG. 6778. 1  | -0. 25949  | noncoding |
| MSTRG. 6777. 3  | -0. 055461 | noncoding |
| MSTRG. 6777. 5  | -0. 225472 | noncoding |
| MSTRG. 6780. 1  | 0. 335117  | coding    |
| MSTRG. 6781. 3  | -0. 510136 | noncoding |
| MSTRG. 6781. 4  | 0. 093436  | coding    |
| MSTRG. 6785. 2  | 0. 1677    | coding    |
| MSTRG. 6786. 1  | -0. 355862 | noncoding |
| MSTRG. 6786. 2  | -0. 981284 | noncoding |
| MSTRG. 6792. 5  | 0. 76191   | coding    |
| MSTRG. 6797. 3  | 1. 76357   | coding    |
| MSTRG. 6797. 4  | -0. 418127 | noncoding |
| MSTRG. 6798. 1  | -1. 0838   | noncoding |
| MSTRG. 6800. 1  | 0. 848927  | coding    |
| MSTRG. 6806. 2  | 1. 56159   | coding    |
| MSTRG. 6804. 1  | 0. 310209  | coding    |
| MSTRG. 6817. 3  | 0. 825293  | coding    |
| MSTRG. 6823. 1  | -0. 358174 | noncoding |
| MSTRG. 6811. 1  | -1. 3696   | noncoding |
| MSTRG. 6811. 2  | -1. 58486  | noncoding |
| MSTRG. 6857. 1  | 1. 56537   | coding    |
| MSTRG. 6857. 2  | 2. 67687   | coding    |
| MSTRG. 6857. 3  | 2. 28708   | coding    |
| MSTRG. 6857. 4  | 2. 85156   | coding    |
| MSTRG. 6857. 5  | 0. 705579  | coding    |
| MSTRG. 6857. 6  | 0. 539274  | coding    |
| MSTRG. 6857. 7  | 0. 64819   | coding    |
| MSTRG. 6857. 8  | 0. 58677   | coding    |
| MSTRG. 6859. 1  | 0. 274916  | coding    |
| MSTRG. 6859. 2  | 0. 710765  | coding    |
| MSTRG. 6859. 3  | 0. 069606  | coding    |
| MSTRG. 6859. 4  | 0. 573583  | coding    |
| MSTRG. 6860. 1  | 0. 614329  | coding    |
| MSTRG. 6861. 1  | 1. 10824   | coding    |
| MSTRG. 6861. 2  | 1. 14036   | coding    |
| MSTRG. 6857. 9  | 0. 351179  | coding    |
| MSTRG. 6857. 10 | 0. 331187  | coding    |
| MSTRG. 6857. 11 | 0. 21356   | coding    |
| MSTRG. 6857. 12 | 0. 254212  | coding    |
| MSTRG. 6857. 13 | -0. 39053  | noncoding |
| MSTRG. 6857. 14 | -0. 793178 | noncoding |
| MSTRG. 6857. 15 | 0. 430042  | coding    |
| MSTRG. 6863. 1  | 0. 369018  | coding    |
| MSTRG. 6864. 1  | 0. 163434  | coding    |
| MSTRG. 6864. 2  | -1. 2868   | noncoding |
| MSTRG. 6857. 16 | 0. 679779  | coding    |

|                 |            |           |
|-----------------|------------|-----------|
| MSTRG. 6865. 1  | 0. 010134  | coding    |
| MSTRG. 6857. 17 | 2. 11401   | coding    |
| MSTRG. 6857. 19 | 1. 50927   | coding    |
| MSTRG. 6866. 1  | 1. 39394   | coding    |
| MSTRG. 6857. 20 | 1. 69072   | coding    |
| MSTRG. 6857. 21 | 1. 9457    | coding    |
| MSTRG. 6857. 22 | 1. 20064   | coding    |
| MSTRG. 6857. 23 | 1. 42822   | coding    |
| MSTRG. 6827. 2  | 0. 923337  | coding    |
| MSTRG. 6837. 1  | -0. 135435 | noncoding |
| MSTRG. 6838. 1  | -0. 739817 | noncoding |
| MSTRG. 6839. 1  | -0. 129738 | noncoding |
| MSTRG. 6845. 1  | -1. 70801  | noncoding |
| MSTRG. 6851. 1  | 0. 950956  | coding    |
| MSTRG. 6851. 2  | -0. 827743 | noncoding |
| MSTRG. 6852. 1  | -1. 37676  | noncoding |
| MSTRG. 6869. 1  | 1. 09778   | coding    |
| MSTRG. 6871. 2  | -0. 773581 | noncoding |
| MSTRG. 6873. 2  | 1. 40572   | coding    |
| MSTRG. 6873. 3  | 1. 42385   | coding    |
| MSTRG. 6884. 1  | 1. 22457   | coding    |
| MSTRG. 6885. 1  | -0. 546633 | noncoding |
| MSTRG. 6886. 1  | 0. 386386  | coding    |
| MSTRG. 6887. 1  | 0. 08728   | coding    |
| MSTRG. 6888. 1  | 1. 04407   | coding    |
| MSTRG. 6901. 1  | -0. 613264 | noncoding |
| MSTRG. 6906. 7  | 1. 22649   | coding    |
| MSTRG. 6906. 8  | 0. 956742  | coding    |
| MSTRG. 6906. 9  | 0. 074285  | coding    |
| MSTRG. 6906. 10 | -0. 129606 | noncoding |
| MSTRG. 6907. 1  | 0. 440213  | coding    |
| MSTRG. 6902. 1  | -2. 11079  | noncoding |
| MSTRG. 6919. 1  | 0. 081676  | coding    |
| MSTRG. 6920. 1  | -0. 157667 | noncoding |
| MSTRG. 6921. 1  | -0. 356746 | noncoding |
| MSTRG. 6922. 4  | 0. 236232  | coding    |
| MSTRG. 6922. 3  | 1. 78438   | coding    |
| MSTRG. 6922. 5  | -0. 115181 | noncoding |
| MSTRG. 6923. 1  | -1. 86786  | noncoding |
| MSTRG. 6925. 1  | -1. 17838  | noncoding |
| MSTRG. 6925. 2  | -1. 61797  | noncoding |
| MSTRG. 6925. 3  | -1. 47218  | noncoding |
| MSTRG. 6926. 1  | -1. 33681  | noncoding |
| MSTRG. 6934. 1  | 0. 059246  | coding    |
| MSTRG. 6939. 3  | -0. 705044 | noncoding |
| MSTRG. 6941. 1  | 1. 02143   | coding    |
| MSTRG. 6941. 2  | 0. 998829  | coding    |
| MSTRG. 6943. 1  | 0. 632839  | coding    |
| MSTRG. 6943. 2  | 0. 86213   | coding    |
| MSTRG. 6943. 4  | 1. 44615   | coding    |
| MSTRG. 6945. 2  | 2. 43976   | coding    |
| MSTRG. 6947. 3  | 1. 70357   | coding    |
| MSTRG. 6947. 4  | 1. 58911   | coding    |
| MSTRG. 6947. 6  | 1. 6954    | coding    |

|                 |            |           |
|-----------------|------------|-----------|
| MSTRG. 6948. 1  | -0. 578242 | noncoding |
| MSTRG. 6947. 7  | 1. 44339   | coding    |
| MSTRG. 6947. 8  | 0. 405282  | coding    |
| MSTRG. 6956. 3  | 1. 99551   | coding    |
| MSTRG. 6962. 4  | 1. 15179   | coding    |
| MSTRG. 6962. 5  | 2. 14406   | coding    |
| MSTRG. 6966. 4  | 2. 58683   | coding    |
| MSTRG. 6967. 3  | 0. 955217  | coding    |
| MSTRG. 6970. 3  | 2. 96839   | coding    |
| MSTRG. 6973. 5  | 1. 63879   | coding    |
| MSTRG. 6974. 1  | 0. 833753  | coding    |
| MSTRG. 6975. 1  | 1. 1398    | coding    |
| MSTRG. 6985. 1  | 2. 02109   | coding    |
| MSTRG. 6986. 1  | 1. 23153   | coding    |
| MSTRG. 6986. 4  | 0. 675644  | coding    |
| MSTRG. 6988. 1  | -1. 59495  | noncoding |
| MSTRG. 6997. 1  | -0. 129056 | noncoding |
| MSTRG. 6997. 2  | 0. 047379  | coding    |
| MSTRG. 6995. 2  | -1. 70775  | noncoding |
| MSTRG. 6995. 4  | -1. 14954  | noncoding |
| MSTRG. 6995. 3  | -1. 09281  | noncoding |
| MSTRG. 6995. 5  | -1. 1565   | noncoding |
| MSTRG. 6977. 1  | -0. 624553 | noncoding |
| MSTRG. 6977. 2  | -1. 0609   | noncoding |
| MSTRG. 6977. 3  | -0. 74853  | noncoding |
| MSTRG. 6977. 4  | -0. 552882 | noncoding |
| MSTRG. 6977. 5  | -1. 67984  | noncoding |
| MSTRG. 6980. 3  | 0. 753671  | coding    |
| MSTRG. 6980. 2  | 0. 809378  | coding    |
| MSTRG. 6981. 6  | 0. 690016  | coding    |
| MSTRG. 6981. 4  | 0. 477621  | coding    |
| MSTRG. 6981. 5  | 0. 428922  | coding    |
| MSTRG. 7007. 1  | 0. 237437  | coding    |
| MSTRG. 7007. 2  | 1. 39287   | coding    |
| MSTRG. 7007. 4  | 1. 01747   | coding    |
| MSTRG. 7007. 5  | 1. 43534   | coding    |
| MSTRG. 7008. 2  | 0. 254283  | coding    |
| MSTRG. 7007. 11 | 1. 79538   | coding    |
| MSTRG. 6982. 1  | 1. 03883   | coding    |
| MSTRG. 6983. 1  | -2. 3294   | noncoding |
| MSTRG. 6982. 3  | 1. 12204   | coding    |
| MSTRG. 7005. 3  | 0. 349063  | coding    |
| MSTRG. 7006. 1  | 1. 85474   | coding    |
| MSTRG. 7012. 2  | 1. 33037   | coding    |
| MSTRG. 7019. 1  | -0. 262535 | noncoding |
| MSTRG. 7035. 2  | 1. 00406   | coding    |
| MSTRG. 7041. 4  | -0. 670071 | noncoding |
| MSTRG. 7044. 1  | -1. 62016  | noncoding |
| MSTRG. 7050. 1  | -1. 47612  | noncoding |
| MSTRG. 7050. 3  | -1. 72507  | noncoding |
| MSTRG. 7050. 2  | -0. 200387 | noncoding |
| MSTRG. 7054. 1  | -2. 14328  | noncoding |
| MSTRG. 7075. 4  | 0. 300869  | coding    |
| MSTRG. 7075. 5  | -1. 0104   | noncoding |

|                 |            |           |
|-----------------|------------|-----------|
| MSTRG. 7079. 1  | 0. 502869  | coding    |
| MSTRG. 7083. 1  | -2. 6881   | noncoding |
| MSTRG. 7077. 3  | 0. 306241  | coding    |
| MSTRG. 7091. 3  | 1. 91893   | coding    |
| MSTRG. 7091. 5  | 1. 93044   | coding    |
| MSTRG. 7091. 4  | 1. 64649   | coding    |
| MSTRG. 7096. 1  | -0. 071645 | noncoding |
| MSTRG. 7102. 1  | 0. 163928  | coding    |
| MSTRG. 7102. 2  | -0. 002608 | noncoding |
| MSTRG. 7102. 3  | 0. 243243  | coding    |
| MSTRG. 7103. 1  | 0. 883776  | coding    |
| MSTRG. 7104. 1  | 1. 83429   | coding    |
| MSTRG. 7110. 1  | -1. 83249  | noncoding |
| MSTRG. 7111. 3  | 1. 83278   | coding    |
| MSTRG. 7111. 4  | 1. 84903   | coding    |
| MSTRG. 7111. 5  | 1. 37698   | coding    |
| MSTRG. 7118. 2  | 0. 582927  | coding    |
| MSTRG. 7122. 3  | 1. 25713   | coding    |
| MSTRG. 7130. 2  | 2. 59089   | coding    |
| MSTRG. 7130. 3  | 2. 7026    | coding    |
| MSTRG. 7130. 4  | 1. 95053   | coding    |
| MSTRG. 7135. 3  | -0. 114896 | noncoding |
| MSTRG. 7135. 4  | -1. 66602  | noncoding |
| MSTRG. 7138. 2  | 1. 1656    | coding    |
| MSTRG. 7141. 1  | 1. 70128   | coding    |
| MSTRG. 7141. 3  | 1. 56057   | coding    |
| MSTRG. 7142. 1  | -0. 231504 | noncoding |
| MSTRG. 7147. 3  | -0. 792651 | noncoding |
| MSTRG. 7147. 2  | 1. 57451   | coding    |
| MSTRG. 7146. 1  | -2. 03943  | noncoding |
| MSTRG. 7154. 2  | 1. 14667   | coding    |
| MSTRG. 7154. 5  | 1. 22783   | coding    |
| MSTRG. 7154. 6  | -0. 598627 | noncoding |
| MSTRG. 7156. 1  | 1. 01674   | coding    |
| MSTRG. 7161. 1  | 2. 82579   | coding    |
| MSTRG. 7161. 2  | 0. 385169  | coding    |
| MSTRG. 7162. 1  | -0. 921056 | noncoding |
| MSTRG. 7164. 1  | -1. 4473   | noncoding |
| MSTRG. 7165. 1  | 0. 000309  | coding    |
| MSTRG. 7165. 2  | 0. 930326  | coding    |
| MSTRG. 7166. 1  | 1. 28264   | coding    |
| MSTRG. 7169. 1  | -0. 7778   | noncoding |
| MSTRG. 7177. 1  | -0. 480454 | noncoding |
| MSTRG. 7178. 1  | -0. 897557 | noncoding |
| MSTRG. 7178. 2  | -1. 6509   | noncoding |
| MSTRG. 7177. 2  | -1. 03677  | noncoding |
| MSTRG. 7177. 3  | -0. 815564 | noncoding |
| MSTRG. 7177. 4  | -0. 858016 | noncoding |
| MSTRG. 7177. 8  | -0. 759571 | noncoding |
| MSTRG. 7177. 7  | -0. 804337 | noncoding |
| MSTRG. 7177. 6  | -0. 56932  | noncoding |
| MSTRG. 7177. 5  | -0. 497514 | noncoding |
| MSTRG. 7177. 9  | -0. 020123 | noncoding |
| MSTRG. 7177. 10 | -0. 795712 | noncoding |

|                 |            |           |
|-----------------|------------|-----------|
| MSTRG. 7177. 11 | -0. 556918 | noncoding |
| MSTRG. 7177. 12 | -0. 446598 | noncoding |
| MSTRG. 7177. 15 | -1. 71226  | noncoding |
| MSTRG. 7177. 16 | -1. 78563  | noncoding |
| MSTRG. 7177. 13 | -0. 848501 | noncoding |
| MSTRG. 7177. 14 | -0. 839865 | noncoding |
| MSTRG. 7177. 18 | -0. 283318 | noncoding |
| MSTRG. 7177. 19 | 0. 106826  | coding    |
| MSTRG. 7179. 1  | -0. 98228  | noncoding |
| MSTRG. 7172. 1  | -0. 545805 | noncoding |
| MSTRG. 7176. 7  | 1. 89773   | coding    |
| MSTRG. 7176. 4  | 1. 20134   | coding    |
| MSTRG. 7176. 5  | 1. 27978   | coding    |
| MSTRG. 7176. 6  | 1. 25347   | coding    |
| MSTRG. 7183. 1  | 0. 611351  | coding    |
| MSTRG. 7183. 3  | 1. 20061   | coding    |
| MSTRG. 7189. 1  | 0. 719113  | coding    |
| MSTRG. 7191. 3  | 1. 03706   | coding    |
| MSTRG. 7194. 1  | -0. 631798 | noncoding |
| MSTRG. 7195. 1  | 1. 07122   | coding    |
| MSTRG. 7195. 2  | 1. 52805   | coding    |
| MSTRG. 7196. 1  | -0. 513901 | noncoding |
| MSTRG. 7195. 3  | 0. 470762  | coding    |
| MSTRG. 7186. 1  | -2. 54005  | noncoding |
| MSTRG. 7197. 3  | 2. 52159   | coding    |
| MSTRG. 7200. 2  | 2. 4007    | coding    |
| MSTRG. 7200. 3  | 2. 38888   | coding    |
| MSTRG. 7202. 1  | -0. 442126 | noncoding |
| MSTRG. 7206. 4  | 1. 12621   | coding    |
| MSTRG. 7206. 5  | 0. 97998   | coding    |
| MSTRG. 7206. 6  | -0. 294664 | noncoding |
| MSTRG. 7207. 1  | 0. 263025  | coding    |
| MSTRG. 7206. 7  | 0. 98745   | coding    |
| MSTRG. 7211. 1  | 0. 012336  | coding    |
| MSTRG. 7213. 1  | 0. 465795  | coding    |
| MSTRG. 7216. 2  | 2. 0739    | coding    |
| MSTRG. 7220. 2  | 1. 69624   | coding    |
| MSTRG. 7220. 3  | 1. 34853   | coding    |
| MSTRG. 7220. 4  | 0. 777095  | coding    |
| MSTRG. 7225. 1  | 0. 981007  | coding    |
| MSTRG. 7227. 1  | 1. 06638   | coding    |
| MSTRG. 7232. 2  | -0. 109944 | noncoding |
| MSTRG. 7232. 3  | -0. 371293 | noncoding |
| MSTRG. 7232. 1  | 0. 989711  | coding    |
| MSTRG. 7232. 4  | 1. 05064   | coding    |
| MSTRG. 7232. 5  | 0. 722624  | coding    |
| MSTRG. 7232. 6  | -0. 095779 | noncoding |
| MSTRG. 7235. 3  | 1. 55714   | coding    |
| MSTRG. 7235. 4  | 1. 55931   | coding    |
| MSTRG. 7245. 1  | 0. 167227  | coding    |
| MSTRG. 7258. 7  | 1. 75619   | coding    |
| MSTRG. 7258. 6  | 1. 32178   | coding    |
| MSTRG. 7258. 5  | 1. 44922   | coding    |
| MSTRG. 7260. 1  | -0. 484441 | noncoding |

|                 |            |           |
|-----------------|------------|-----------|
| MSTRG. 7262. 3  | 1. 29258   | coding    |
| MSTRG. 7262. 5  | -0. 640073 | noncoding |
| MSTRG. 7263. 1  | 0. 815442  | coding    |
| MSTRG. 7263. 2  | 0. 517016  | coding    |
| MSTRG. 7264. 1  | -0. 675791 | noncoding |
| MSTRG. 7266. 9  | 1. 20446   | coding    |
| MSTRG. 7266. 12 | 0. 441473  | coding    |
| MSTRG. 7268. 1  | -0. 87001  | noncoding |
| MSTRG. 7269. 5  | -0. 847533 | noncoding |
| MSTRG. 7269. 7  | -1. 11405  | noncoding |
| MSTRG. 7269. 3  | -1. 41447  | noncoding |
| MSTRG. 7269. 4  | -1. 42488  | noncoding |
| MSTRG. 7269. 6  | 0. 28349   | coding    |
| MSTRG. 7269. 8  | -0. 552817 | noncoding |
| MSTRG. 7269. 9  | -0. 182111 | noncoding |
| MSTRG. 7270. 1  | -0. 577458 | noncoding |
| MSTRG. 7271. 1  | -0. 875319 | noncoding |
| MSTRG. 7277. 1  | -0. 18641  | noncoding |
| MSTRG. 7278. 1  | -0. 828409 | noncoding |
| MSTRG. 7279. 1  | 0. 607546  | coding    |
| MSTRG. 7276. 3  | 0. 883436  | coding    |
| MSTRG. 7276. 4  | 1. 49259   | coding    |
| MSTRG. 7281. 1  | -2. 37381  | noncoding |
| MSTRG. 7281. 2  | -1. 80771  | noncoding |
| MSTRG. 7286. 10 | 1. 9252    | coding    |
| MSTRG. 7286. 3  | 2. 05933   | coding    |
| MSTRG. 7286. 5  | 2. 10574   | coding    |
| MSTRG. 7286. 7  | 1. 72757   | coding    |
| MSTRG. 7286. 8  | 1. 71269   | coding    |
| MSTRG. 7286. 9  | 1. 97585   | coding    |
| MSTRG. 7286. 11 | 1. 96375   | coding    |
| MSTRG. 7286. 17 | 0. 601316  | coding    |
| MSTRG. 7292. 1  | 1. 70664   | coding    |
| MSTRG. 7292. 3  | 0. 965243  | coding    |
| MSTRG. 7293. 3  | 0. 48429   | coding    |
| MSTRG. 7296. 1  | 2. 25918   | coding    |
| MSTRG. 7297. 3  | 3. 08892   | coding    |
| MSTRG. 7297. 5  | 3. 09132   | coding    |
| MSTRG. 7298. 1  | 0. 432454  | coding    |
| MSTRG. 7300. 1  | -0. 576528 | noncoding |
| MSTRG. 7297. 6  | 0. 315007  | coding    |
| MSTRG. 7297. 7  | 0. 119406  | coding    |
| MSTRG. 7295. 2  | 0. 201712  | coding    |
| MSTRG. 7303. 1  | -0. 035973 | noncoding |
| MSTRG. 7306. 1  | 0. 619657  | coding    |
| MSTRG. 7306. 2  | -0. 774161 | noncoding |
| MSTRG. 7316. 1  | 0. 258669  | coding    |
| MSTRG. 7317. 1  | 0. 248125  | coding    |
| MSTRG. 7322. 4  | 1. 30932   | coding    |
| MSTRG. 7322. 5  | 1. 27862   | coding    |
| MSTRG. 7323. 1  | -2. 28737  | noncoding |
| MSTRG. 7323. 2  | -1. 9643   | noncoding |
| MSTRG. 7325. 1  | -1. 48321  | noncoding |
| MSTRG. 7320. 1  | -1. 48886  | noncoding |

|                 |           |           |
|-----------------|-----------|-----------|
| MSTRG. 7320. 2  | -0.644539 | noncoding |
| MSTRG. 7321. 1  | -2.36191  | noncoding |
| MSTRG. 7333. 5  | 1.01907   | coding    |
| MSTRG. 7335. 2  | 1.31159   | coding    |
| MSTRG. 7335. 4  | 1.19795   | coding    |
| MSTRG. 7335. 5  | 1.58419   | coding    |
| MSTRG. 7335. 8  | 1.99403   | coding    |
| MSTRG. 7335. 9  | 1.82992   | coding    |
| MSTRG. 7335. 10 | 1.21179   | coding    |
| MSTRG. 7335. 11 | 0.325388  | coding    |
| MSTRG. 7335. 12 | 0.369521  | coding    |
| MSTRG. 7335. 13 | 0.66737   | coding    |
| MSTRG. 7340. 2  | 1.62748   | coding    |
| MSTRG. 7340. 3  | 0.173883  | coding    |
| MSTRG. 7340. 4  | 0.236679  | coding    |
| MSTRG. 7341. 1  | -1.89308  | noncoding |
| MSTRG. 7342. 1  | 1.58971   | coding    |
| MSTRG. 7343. 1  | 1.15071   | coding    |
| MSTRG. 7344. 4  | 0.430713  | coding    |
| MSTRG. 7346. 1  | -1.63704  | noncoding |
| MSTRG. 7348. 1  | -1.88257  | noncoding |
| MSTRG. 7350. 1  | 0.443764  | coding    |
| MSTRG. 7354. 2  | 1.57558   | coding    |
| MSTRG. 7359. 1  | -2.07994  | noncoding |
| MSTRG. 7370. 1  | 0.069709  | coding    |
| MSTRG. 7371. 1  | -0.392857 | noncoding |
| MSTRG. 7369. 3  | 1.45689   | coding    |
| MSTRG. 7372. 1  | 0.494336  | coding    |
| MSTRG. 7373. 1  | -0.247868 | noncoding |
| MSTRG. 7374. 1  | -0.055362 | noncoding |
| MSTRG. 7366. 2  | 1.92995   | coding    |
| MSTRG. 7365. 1  | -1.23383  | noncoding |
| MSTRG. 7390. 1  | -1.33381  | noncoding |
| MSTRG. 7392. 1  | 0.175024  | coding    |
| MSTRG. 7393. 1  | -1.77602  | noncoding |
| MSTRG. 7394. 1  | -1.35357  | noncoding |
| MSTRG. 7376. 3  | 1.03069   | coding    |
| MSTRG. 7376. 5  | 1.00803   | coding    |
| MSTRG. 7382. 1  | -0.305709 | noncoding |
| MSTRG. 7385. 1  | -1.54681  | noncoding |
| MSTRG. 7387. 1  | 1.60992   | coding    |
| MSTRG. 7415. 2  | 2.05026   | coding    |
| MSTRG. 7415. 4  | 0.232856  | coding    |
| MSTRG. 7415. 3  | 0.961457  | coding    |
| MSTRG. 7415. 5  | 1.0267    | coding    |
| MSTRG. 7415. 6  | 0.725491  | coding    |
| MSTRG. 7415. 7  | 1.54985   | coding    |
| MSTRG. 7421. 3  | 0.314039  | coding    |
| MSTRG. 7423. 4  | 1.02288   | coding    |
| MSTRG. 7423. 2  | 1.36822   | coding    |
| MSTRG. 7423. 3  | 1.3511    | coding    |
| MSTRG. 7426. 1  | 1.80492   | coding    |
| MSTRG. 7431. 1  | 0.725623  | coding    |
| MSTRG. 7431. 2  | 1.07196   | coding    |

|                |            |           |
|----------------|------------|-----------|
| MSTRG. 7432. 1 | 0. 52372   | coding    |
| MSTRG. 7432. 9 | 0. 776969  | coding    |
| MSTRG. 7432. 5 | 2. 03441   | coding    |
| MSTRG. 7432. 6 | 2. 16972   | coding    |
| MSTRG. 7432. 7 | 2. 07635   | coding    |
| MSTRG. 7434. 1 | -0. 966267 | noncoding |
| MSTRG. 7429. 1 | 1. 63411   | coding    |
| MSTRG. 7429. 2 | 1. 0332    | coding    |
| MSTRG. 7437. 1 | -2. 21481  | noncoding |
| MSTRG. 7438. 1 | 0. 933612  | coding    |
| MSTRG. 7439. 4 | 0. 454692  | coding    |
| MSTRG. 7441. 1 | 1. 51056   | coding    |
| MSTRG. 7448. 1 | -1. 34626  | noncoding |
| MSTRG. 7448. 2 | -1. 29152  | noncoding |
| MSTRG. 7452. 1 | 1. 40463   | coding    |
| MSTRG. 7452. 3 | 1. 11991   | coding    |
| MSTRG. 7454. 1 | 0. 628074  | coding    |
| MSTRG. 7451. 2 | -0. 203597 | noncoding |
| MSTRG. 7455. 1 | 2. 00882   | coding    |
| MSTRG. 7455. 2 | 2. 91276   | coding    |
| MSTRG. 7456. 6 | 0. 576978  | coding    |
| MSTRG. 7456. 7 | 0. 327362  | coding    |
| MSTRG. 7456. 8 | 0. 438703  | coding    |
| MSTRG. 7458. 1 | -1. 91937  | noncoding |
| MSTRG. 7457. 3 | 0. 022329  | coding    |
| MSTRG. 7462. 1 | -2. 27891  | noncoding |
| MSTRG. 7467. 1 | 1. 94895   | coding    |
| MSTRG. 7465. 1 | 0. 354438  | coding    |
| MSTRG. 7470. 1 | -2. 36143  | noncoding |
| MSTRG. 7474. 2 | 0. 329253  | coding    |
| MSTRG. 7476. 1 | -1. 64997  | noncoding |
| MSTRG. 7487. 1 | -1. 71989  | noncoding |
| MSTRG. 7485. 2 | 1. 05243   | coding    |
| MSTRG. 7499. 1 | 1. 20277   | coding    |
| MSTRG. 7496. 1 | -0. 725125 | noncoding |
| MSTRG. 7501. 1 | -1. 0169   | noncoding |
| MSTRG. 7505. 1 | 0. 669243  | coding    |
| MSTRG. 7505. 2 | 0. 749614  | coding    |
| MSTRG. 7518. 1 | -0. 205569 | noncoding |
| MSTRG. 7529. 1 | -0. 718915 | noncoding |
| MSTRG. 7529. 2 | -0. 987827 | noncoding |
| MSTRG. 7531. 1 | -0. 612678 | noncoding |
| MSTRG. 7534. 1 | -1. 81768  | noncoding |
| MSTRG. 7537. 4 | 2. 66878   | coding    |
| MSTRG. 7538. 1 | 0. 313257  | coding    |
| MSTRG. 7539. 1 | 2. 8869    | coding    |
| MSTRG. 7541. 1 | 1. 02685   | coding    |
| MSTRG. 7542. 1 | -0. 715536 | noncoding |
| MSTRG. 7539. 2 | 3. 12473   | coding    |
| MSTRG. 7544. 2 | 0. 426912  | coding    |
| MSTRG. 7551. 1 | 2. 03533   | coding    |
| MSTRG. 7551. 2 | 2. 05034   | coding    |
| MSTRG. 7552. 1 | -1. 42457  | noncoding |
| MSTRG. 7552. 3 | -1. 54517  | noncoding |



|                |           |           |
|----------------|-----------|-----------|
| MSTRG. 7552. 2 | -1.64826  | noncoding |
| MSTRG. 7556. 2 | 1.61221   | coding    |
| MSTRG. 7557. 1 | -0.517332 | noncoding |
| MSTRG. 7557. 2 | -0.178392 | noncoding |
| MSTRG. 7557. 3 | -0.524016 | noncoding |
| MSTRG. 7557. 4 | -0.8527   | noncoding |
| MSTRG. 7557. 5 | -0.107931 | noncoding |
| MSTRG. 7557. 6 | -0.562066 | noncoding |
| MSTRG. 7560. 3 | 0.986589  | coding    |
| MSTRG. 7562. 6 | 0.330926  | coding    |
| MSTRG. 7562. 7 | 0.637504  | coding    |
| MSTRG. 7562. 8 | 0.586286  | coding    |
| MSTRG. 7563. 1 | 0.914452  | coding    |
| MSTRG. 7563. 2 | 0.969655  | coding    |
| MSTRG. 7563. 4 | 0.536965  | coding    |
| MSTRG. 7573. 4 | 3.13629   | coding    |
| MSTRG. 7573. 5 | 3.13308   | coding    |
| MSTRG. 7585. 1 | 0.308629  | coding    |
| MSTRG. 7572. 1 | 1.73218   | coding    |
| MSTRG. 7572. 2 | 1.821     | coding    |
| MSTRG. 7580. 2 | 1.23807   | coding    |
| MSTRG. 7588. 2 | 2.04446   | coding    |
| MSTRG. 7591. 2 | 1.5127    | coding    |
| MSTRG. 7591. 3 | 1.48445   | coding    |
| MSTRG. 7591. 4 | -0.380796 | noncoding |
| MSTRG. 7592. 1 | 1.1967    | coding    |
| MSTRG. 7594. 1 | -0.854707 | noncoding |
| MSTRG. 7597. 2 | -2.18777  | noncoding |
| MSTRG. 7597. 1 | -2.68047  | noncoding |
| MSTRG. 7600. 1 | 1.24525   | coding    |
| MSTRG. 7604. 3 | 0.835155  | coding    |
| MSTRG. 7604. 4 | 0.823435  | coding    |
| MSTRG. 7604. 5 | -0.408433 | noncoding |
| MSTRG. 7606. 1 | 2.14512   | coding    |
| MSTRG. 7608. 2 | 0.807252  | coding    |
| MSTRG. 7611. 1 | 0.936721  | coding    |
| MSTRG. 7617. 2 | 0.228409  | coding    |
| MSTRG. 7618. 3 | 0.250187  | coding    |
| MSTRG. 7618. 4 | -0.012111 | noncoding |
| MSTRG. 7619. 3 | 1.84107   | coding    |
| MSTRG. 7621. 1 | 1.53038   | coding    |
| MSTRG. 7615. 2 | 0.652424  | coding    |
| MSTRG. 7615. 1 | 0.066266  | coding    |
| MSTRG. 7615. 3 | 0.847593  | coding    |
| MSTRG. 7615. 4 | 0.64141   | coding    |
| MSTRG. 7615. 5 | 0.212764  | coding    |
| MSTRG. 7616. 2 | -1.67214  | noncoding |
| MSTRG. 7625. 1 | 2.20125   | coding    |
| MSTRG. 7625. 2 | 2.23382   | coding    |
| MSTRG. 7626. 1 | 1.6418    | coding    |
| MSTRG. 7626. 2 | 1.39282   | coding    |
| MSTRG. 7630. 2 | 2.09749   | coding    |
| MSTRG. 7630. 3 | 2.79424   | coding    |
| MSTRG. 7632. 3 | -0.561005 | noncoding |

|                 |            |           |
|-----------------|------------|-----------|
| MSTRG. 7637. 1  | 0. 197291  | coding    |
| MSTRG. 7637. 4  | 1. 01013   | coding    |
| MSTRG. 7637. 5  | 0. 126055  | coding    |
| MSTRG. 7638. 1  | 1. 06591   | coding    |
| MSTRG. 7638. 10 | 2. 13372   | coding    |
| MSTRG. 7638. 11 | 2. 13009   | coding    |
| MSTRG. 7638. 5  | 2. 17432   | coding    |
| MSTRG. 7638. 6  | 2. 18054   | coding    |
| MSTRG. 7638. 7  | 2. 12655   | coding    |
| MSTRG. 7638. 8  | 2. 18823   | coding    |
| MSTRG. 7638. 9  | 2. 21633   | coding    |
| MSTRG. 7639. 1  | 1. 53555   | coding    |
| MSTRG. 7638. 12 | 1. 55824   | coding    |
| MSTRG. 7640. 2  | -0. 133331 | noncoding |
| MSTRG. 7640. 3  | -0. 34128  | noncoding |
| MSTRG. 7642. 1  | 0. 901591  | coding    |
| MSTRG. 7642. 2  | 0. 679052  | coding    |
| MSTRG. 7642. 3  | 0. 059997  | coding    |
| MSTRG. 7642. 4  | -0. 325366 | noncoding |
| MSTRG. 7634. 2  | 1. 00249   | coding    |
| MSTRG. 7635. 1  | 1. 00464   | coding    |
| MSTRG. 7635. 2  | 1. 01205   | coding    |
| MSTRG. 7635. 3  | 0. 652957  | coding    |
| MSTRG. 7635. 5  | 0. 497765  | coding    |
| MSTRG. 7636. 1  | -2. 00733  | noncoding |
| MSTRG. 7636. 2  | -1. 78422  | noncoding |
| MSTRG. 7650. 1  | 3. 27636   | coding    |
| MSTRG. 7646. 1  | 0. 591033  | coding    |
| MSTRG. 7647. 1  | -1. 5236   | noncoding |
| MSTRG. 7659. 8  | 1. 02771   | coding    |
| MSTRG. 7660. 3  | 1. 31781   | coding    |
| MSTRG. 7660. 5  | 1. 43848   | coding    |
| MSTRG. 7666. 1  | 2. 14135   | coding    |
| MSTRG. 7666. 3  | 2. 07963   | coding    |
| MSTRG. 7666. 4  | 2. 04057   | coding    |
| MSTRG. 7666. 5  | 2. 37835   | coding    |
| MSTRG. 7666. 6  | -0. 270448 | noncoding |
| MSTRG. 7665. 1  | 1. 50165   | coding    |
| MSTRG. 7668. 2  | 1. 90507   | coding    |
| MSTRG. 7668. 3  | 2. 23179   | coding    |
| MSTRG. 7668. 4  | 2. 2413    | coding    |
| MSTRG. 7673. 1  | -0. 383865 | noncoding |
| MSTRG. 7674. 2  | 0. 659192  | coding    |
| MSTRG. 7675. 2  | 1. 06323   | coding    |
| MSTRG. 7680. 1  | -1. 07788  | noncoding |
| MSTRG. 7686. 3  | 1. 30771   | coding    |
| MSTRG. 7694. 1  | -1. 76344  | noncoding |
| MSTRG. 7705. 5  | 1. 55381   | coding    |
| MSTRG. 7703. 1  | 1. 79571   | coding    |
| MSTRG. 7707. 1  | 0. 590235  | coding    |
| MSTRG. 7707. 3  | 0. 584071  | coding    |
| MSTRG. 7711. 4  | 1. 0732    | coding    |
| MSTRG. 7711. 5  | 0. 961818  | coding    |
| MSTRG. 7711. 6  | 1. 05228   | coding    |

|                |            |           |
|----------------|------------|-----------|
| MSTRG. 7711. 3 | 1. 2587    | coding    |
| MSTRG. 7711. 1 | 0. 625965  | coding    |
| MSTRG. 7717. 2 | 1. 64568   | coding    |
| MSTRG. 7717. 1 | 1. 57049   | coding    |
| MSTRG. 7717. 3 | 0. 829377  | coding    |
| MSTRG. 7717. 4 | 0. 402176  | coding    |
| MSTRG. 7717. 5 | -0. 992575 | noncoding |
| MSTRG. 7717. 8 | 1. 27416   | coding    |
| MSTRG. 7714. 2 | 1. 42681   | coding    |
| MSTRG. 7718. 1 | 2. 55885   | coding    |
| MSTRG. 7722. 2 | 1. 51527   | coding    |
| MSTRG. 7722. 3 | 2. 00414   | coding    |
| MSTRG. 7723. 1 | 0. 039034  | coding    |
| MSTRG. 7722. 5 | 1. 45073   | coding    |
| MSTRG. 7722. 6 | 1. 65066   | coding    |
| MSTRG. 7723. 2 | 0. 01947   | coding    |
| MSTRG. 7730. 5 | 1. 23027   | coding    |
| MSTRG. 7730. 6 | 1. 19105   | coding    |
| MSTRG. 7731. 1 | -0. 289208 | noncoding |
| MSTRG. 7733. 3 | 1. 22264   | coding    |
| MSTRG. 7737. 1 | -1. 68443  | noncoding |
| MSTRG. 7738. 1 | 1. 26238   | coding    |
| MSTRG. 7739. 4 | -2. 22303  | noncoding |
| MSTRG. 7740. 2 | -0. 780001 | noncoding |
| MSTRG. 7742. 2 | -0. 010481 | noncoding |
| MSTRG. 7742. 3 | -0. 089888 | noncoding |
| MSTRG. 7735. 1 | -2. 04016  | noncoding |
| MSTRG. 7744. 2 | 2. 11641   | coding    |
| MSTRG. 7745. 1 | -0. 097076 | noncoding |
| MSTRG. 7747. 2 | 2. 14568   | coding    |
| MSTRG. 7747. 3 | 2. 338     | coding    |
| MSTRG. 7747. 4 | 2. 29386   | coding    |
| MSTRG. 7747. 1 | 2. 11313   | coding    |
| MSTRG. 7747. 5 | 2. 26119   | coding    |
| MSTRG. 7751. 3 | 2. 16383   | coding    |
| MSTRG. 7751. 6 | 2. 0752    | coding    |
| MSTRG. 7751. 7 | 1. 19526   | coding    |
| MSTRG. 7751. 8 | 1. 22352   | coding    |
| MSTRG. 7751. 9 | 1. 05822   | coding    |
| MSTRG. 7752. 1 | -1. 19714  | noncoding |
| MSTRG. 7752. 2 | -0. 635668 | noncoding |
| MSTRG. 7755. 1 | 1. 11165   | coding    |
| MSTRG. 7755. 3 | 0. 879715  | coding    |
| MSTRG. 7743. 1 | 2. 86328   | coding    |
| MSTRG. 7758. 1 | -1. 86338  | noncoding |
| MSTRG. 7762. 2 | -0. 129484 | noncoding |
| MSTRG. 7760. 2 | 0. 474661  | coding    |
| MSTRG. 7767. 1 | -1. 75738  | noncoding |
| MSTRG. 7767. 2 | -1. 82872  | noncoding |
| MSTRG. 7769. 2 | 0. 685713  | coding    |
| MSTRG. 7770. 1 | -1. 15453  | noncoding |
| MSTRG. 7770. 2 | -1. 44843  | noncoding |
| MSTRG. 7771. 4 | -0. 567235 | noncoding |
| MSTRG. 7772. 3 | 1. 39501   | coding    |

|                 |           |           |
|-----------------|-----------|-----------|
| MSTRG. 7773. 2  | -0.406203 | noncoding |
| MSTRG. 7780. 2  | -0.665341 | noncoding |
| MSTRG. 7782. 1  | 0.080682  | coding    |
| MSTRG. 7782. 2  | 0.288178  | coding    |
| MSTRG. 7782. 3  | -0.28974  | noncoding |
| MSTRG. 7782. 4  | 0.691982  | coding    |
| MSTRG. 7782. 5  | 0.692022  | coding    |
| MSTRG. 7782. 8  | -0.129854 | noncoding |
| MSTRG. 7782. 6  | 0.42669   | coding    |
| MSTRG. 7782. 7  | 0.120497  | coding    |
| MSTRG. 7782. 9  | 0.276041  | coding    |
| MSTRG. 7782. 10 | 0.268462  | coding    |
| MSTRG. 7782. 12 | 0.108116  | coding    |
| MSTRG. 7782. 13 | 0.228706  | coding    |
| MSTRG. 7782. 14 | -0.602348 | noncoding |
| MSTRG. 7783. 1  | -1.15214  | noncoding |
| MSTRG. 7787. 1  | 1.17291   | coding    |
| MSTRG. 7790. 3  | 0.499959  | coding    |
| MSTRG. 7791. 1  | -1.16946  | noncoding |
| MSTRG. 7794. 3  | 0.419657  | coding    |
| MSTRG. 7795. 1  | -0.338355 | noncoding |
| MSTRG. 7796. 3  | 1.69286   | coding    |
| MSTRG. 7796. 5  | 1.26445   | coding    |
| MSTRG. 7796. 6  | 0.631371  | coding    |
| MSTRG. 7796. 7  | -1.38555  | noncoding |
| MSTRG. 7797. 1  | -0.201621 | noncoding |
| MSTRG. 7799. 2  | 0.940547  | coding    |
| MSTRG. 7800. 1  | -1.88012  | noncoding |
| MSTRG. 7801. 2  | -1.54161  | noncoding |
| MSTRG. 7801. 1  | -1.60605  | noncoding |
| MSTRG. 7803. 1  | -0.428817 | noncoding |
| MSTRG. 7804. 2  | 1.67899   | coding    |
| MSTRG. 7805. 1  | 0.719121  | coding    |
| MSTRG. 7805. 3  | 0.481815  | coding    |
| MSTRG. 7805. 4  | 0.248496  | coding    |
| MSTRG. 7805. 5  | 0.581752  | coding    |
| MSTRG. 7809. 1  | -0.359244 | noncoding |
| MSTRG. 7812. 1  | 0.899393  | coding    |
| MSTRG. 7815. 1  | 1.2833    | coding    |
| MSTRG. 7815. 3  | 1.70383   | coding    |
| MSTRG. 7814. 1  | 1.30817   | coding    |
| MSTRG. 7818. 2  | 0.646922  | coding    |
| MSTRG. 7818. 3  | -1.77086  | noncoding |
| MSTRG. 7819. 1  | -1.26501  | noncoding |
| MSTRG. 7821. 2  | -1.21705  | noncoding |
| MSTRG. 7825. 2  | 1.72286   | coding    |
| MSTRG. 7832. 1  | 0.516157  | coding    |
| MSTRG. 7832. 2  | 0.199112  | coding    |
| MSTRG. 7840. 1  | 0.007167  | coding    |
| MSTRG. 7841. 3  | 1.79232   | coding    |
| MSTRG. 7842. 2  | 2.03357   | coding    |
| MSTRG. 7843. 2  | 2.12357   | coding    |
| MSTRG. 7844. 1  | 1.30737   | coding    |
| MSTRG. 7844. 4  | -0.29335  | noncoding |

|                 |            |           |
|-----------------|------------|-----------|
| MSTRG. 7844. 3  | 1. 63928   | coding    |
| MSTRG. 7844. 5  | 1. 17494   | coding    |
| MSTRG. 7844. 6  | 1. 20635   | coding    |
| MSTRG. 7848. 1  | 1. 20311   | coding    |
| MSTRG. 7848. 2  | -1. 80737  | noncoding |
| MSTRG. 7854. 5  | -0. 448071 | noncoding |
| MSTRG. 7859. 2  | 1. 59713   | coding    |
| MSTRG. 7859. 3  | 1. 41974   | coding    |
| MSTRG. 7859. 1  | 1. 4367    | coding    |
| MSTRG. 7859. 4  | 1. 37802   | coding    |
| MSTRG. 7859. 8  | 1. 36544   | coding    |
| MSTRG. 7859. 9  | 1. 34312   | coding    |
| MSTRG. 7859. 7  | 1. 44918   | coding    |
| MSTRG. 7859. 5  | 1. 66347   | coding    |
| MSTRG. 7859. 6  | 1. 38205   | coding    |
| MSTRG. 7859. 10 | 1. 43318   | coding    |
| MSTRG. 7859. 11 | 1. 36868   | coding    |
| MSTRG. 7859. 12 | 1. 63387   | coding    |
| MSTRG. 7860. 1  | -1. 32449  | noncoding |
| MSTRG. 7859. 14 | -1. 94004  | noncoding |
| MSTRG. 7859. 13 | 1. 68971   | coding    |
| MSTRG. 7859. 15 | 1. 69342   | coding    |
| MSTRG. 7859. 16 | 2. 08064   | coding    |
| MSTRG. 7863. 1  | -2. 1992   | noncoding |
| MSTRG. 7855. 7  | -0. 568334 | noncoding |
| MSTRG. 7868. 7  | -0. 288792 | noncoding |
| MSTRG. 7870. 1  | -0. 252287 | noncoding |
| MSTRG. 7866. 2  | 1. 02686   | coding    |
| MSTRG. 7866. 3  | 1. 0073    | coding    |
| MSTRG. 7874. 1  | -0. 448754 | noncoding |
| MSTRG. 7873. 2  | 1. 01507   | coding    |
| MSTRG. 7879. 1  | -0. 629445 | noncoding |
| MSTRG. 7878. 1  | -0. 589115 | noncoding |
| MSTRG. 7881. 1  | -2. 11517  | noncoding |
| MSTRG. 7881. 2  | -1. 90589  | noncoding |
| MSTRG. 7884. 1  | -1. 73535  | noncoding |
| MSTRG. 7891. 1  | -1. 70949  | noncoding |
| MSTRG. 7898. 2  | 1. 12643   | coding    |
| MSTRG. 7889. 1  | 0. 026132  | coding    |
| MSTRG. 7903. 1  | 1. 62143   | coding    |
| MSTRG. 7903. 2  | 0. 313857  | coding    |
| MSTRG. 7903. 3  | 0. 426425  | coding    |
| MSTRG. 7903. 4  | 0. 135165  | coding    |
| MSTRG. 7905. 6  | 0. 937915  | coding    |
| MSTRG. 7905. 7  | 1. 64331   | coding    |
| MSTRG. 7915. 10 | 1. 05887   | coding    |
| MSTRG. 7915. 11 | 1. 80423   | coding    |
| MSTRG. 7915. 5  | 1. 87092   | coding    |
| MSTRG. 7915. 6  | 1. 86967   | coding    |
| MSTRG. 7915. 7  | 1. 86498   | coding    |
| MSTRG. 7915. 9  | 1. 88276   | coding    |
| MSTRG. 7915. 12 | -0. 092057 | noncoding |
| MSTRG. 7917. 3  | 1. 98894   | coding    |
| MSTRG. 7917. 4  | 2. 05373   | coding    |

|                 |            |           |
|-----------------|------------|-----------|
| MSTRG. 7913. 1  | -0. 709948 | noncoding |
| MSTRG. 7910. 3  | -0. 247059 | noncoding |
| MSTRG. 7921. 1  | 2. 27152   | coding    |
| MSTRG. 7921. 2  | 2. 11669   | coding    |
| MSTRG. 7921. 4  | 1. 93206   | coding    |
| MSTRG. 7923. 1  | 2. 3586    | coding    |
| MSTRG. 7923. 2  | 2. 20027   | coding    |
| MSTRG. 7922. 2  | 0. 536896  | coding    |
| MSTRG. 7922. 3  | 0. 730793  | coding    |
| MSTRG. 7926. 2  | -0. 832394 | noncoding |
| MSTRG. 7930. 1  | 0. 721804  | coding    |
| MSTRG. 7933. 1  | -0. 221716 | noncoding |
| MSTRG. 7933. 2  | -0. 503907 | noncoding |
| MSTRG. 7932. 1  | -2. 4099   | noncoding |
| MSTRG. 7939. 1  | 2. 35771   | coding    |
| MSTRG. 7939. 2  | 1. 21674   | coding    |
| MSTRG. 7939. 3  | 0. 913743  | coding    |
| MSTRG. 7939. 4  | 0. 193153  | coding    |
| MSTRG. 7935. 2  | 2. 56319   | coding    |
| MSTRG. 7943. 1  | -2. 40315  | noncoding |
| MSTRG. 7944. 3  | 0. 278694  | coding    |
| MSTRG. 7944. 4  | 0. 450513  | coding    |
| MSTRG. 7944. 5  | 0. 897498  | coding    |
| MSTRG. 7944. 6  | 0. 422953  | coding    |
| MSTRG. 7945. 1  | -3. 15128  | noncoding |
| MSTRG. 7944. 7  | -0. 310006 | noncoding |
| MSTRG. 7958. 1  | -2. 33989  | noncoding |
| MSTRG. 7962. 1  | -0. 439425 | noncoding |
| MSTRG. 7984. 1  | 0. 405041  | coding    |
| MSTRG. 7985. 1  | -1. 59507  | noncoding |
| MSTRG. 7990. 1  | -0. 337558 | noncoding |
| MSTRG. 7995. 1  | 1. 12257   | coding    |
| MSTRG. 7996. 1  | -0. 06815  | noncoding |
| MSTRG. 7996. 2  | -0. 155405 | noncoding |
| MSTRG. 7997. 1  | -1. 05755  | noncoding |
| MSTRG. 7998. 1  | 0. 323189  | coding    |
| MSTRG. 7988. 15 | -1. 02031  | noncoding |
| MSTRG. 7988. 13 | -0. 216923 | noncoding |
| MSTRG. 7988. 12 | -0. 57638  | noncoding |
| MSTRG. 7988. 14 | -0. 927252 | noncoding |
| MSTRG. 7988. 11 | 1. 84086   | coding    |
| MSTRG. 7988. 16 | -0. 054168 | noncoding |
| MSTRG. 7988. 18 | -0. 52573  | noncoding |
| MSTRG. 7988. 20 | 1. 12426   | coding    |
| MSTRG. 7988. 22 | -0. 835311 | noncoding |
| MSTRG. 8002. 1  | 1. 33075   | coding    |
| MSTRG. 8002. 2  | 0. 276672  | coding    |
| MSTRG. 8016. 1  | -0. 024836 | noncoding |
| MSTRG. 8019. 1  | 0. 044465  | coding    |
| MSTRG. 8020. 1  | 1. 53472   | coding    |
| MSTRG. 8022. 1  | -1. 07462  | noncoding |
| MSTRG. 8023. 1  | 0. 612635  | coding    |
| MSTRG. 8020. 4  | -0. 614068 | noncoding |
| MSTRG. 8020. 5  | -0. 63453  | noncoding |

|                 |            |           |
|-----------------|------------|-----------|
| MSTRG. 8025. 1  | 0. 308051  | coding    |
| MSTRG. 8024. 7  | -0. 917227 | noncoding |
| MSTRG. 8026. 1  | 1. 03341   | coding    |
| MSTRG. 8027. 1  | -2. 20999  | noncoding |
| MSTRG. 8029. 1  | 1. 75795   | coding    |
| MSTRG. 8029. 2  | 1. 78703   | coding    |
| MSTRG. 8031. 1  | -0. 602847 | noncoding |
| MSTRG. 8032. 2  | 2. 93734   | coding    |
| MSTRG. 8010. 1  | -2. 42489  | noncoding |
| MSTRG. 8060. 1  | -0. 71092  | noncoding |
| MSTRG. 8071. 1  | -1. 13167  | noncoding |
| MSTRG. 8074. 1  | -0. 218631 | noncoding |
| MSTRG. 8096. 1  | 1. 55287   | coding    |
| MSTRG. 8096. 2  | 2. 56953   | coding    |
| MSTRG. 8096. 3  | 2. 57526   | coding    |
| MSTRG. 8096. 4  | 2. 52668   | coding    |
| MSTRG. 8096. 11 | 2. 62667   | coding    |
| MSTRG. 8096. 12 | 1. 77717   | coding    |
| MSTRG. 8096. 6  | 2. 61918   | coding    |
| MSTRG. 8096. 10 | 2. 68278   | coding    |
| MSTRG. 8096. 5  | 2. 67931   | coding    |
| MSTRG. 8096. 7  | 2. 68627   | coding    |
| MSTRG. 8096. 8  | 2. 62124   | coding    |
| MSTRG. 8096. 9  | 2. 82528   | coding    |
| MSTRG. 8096. 13 | 2. 50282   | coding    |
| MSTRG. 8096. 14 | 2. 40009   | coding    |
| MSTRG. 8097. 1  | 0. 597059  | coding    |
| MSTRG. 8098. 1  | 0. 749424  | coding    |
| MSTRG. 8098. 2  | 0. 734032  | coding    |
| MSTRG. 8099. 1  | -0. 16868  | noncoding |
| MSTRG. 8098. 3  | 0. 561587  | coding    |
| MSTRG. 8100. 1  | 0. 089263  | coding    |
| MSTRG. 8096. 15 | 0. 269971  | coding    |
| MSTRG. 8096. 16 | 0. 623255  | coding    |
| MSTRG. 8096. 17 | 0. 71282   | coding    |
| MSTRG. 8096. 18 | 0. 702527  | coding    |
| MSTRG. 8096. 19 | 0. 322884  | coding    |
| MSTRG. 8096. 20 | 0. 44184   | coding    |
| MSTRG. 8096. 21 | 0. 547955  | coding    |
| MSTRG. 8096. 22 | -0. 179609 | noncoding |
| MSTRG. 8083. 1  | -0. 120427 | noncoding |
| MSTRG. 8086. 1  | -2. 5095   | noncoding |
| MSTRG. 8103. 1  | 1. 38338   | coding    |
| MSTRG. 8109. 3  | 1. 67749   | coding    |
| MSTRG. 8110. 2  | 1. 49045   | coding    |
| MSTRG. 8110. 4  | 1. 49914   | coding    |
| MSTRG. 8110. 6  | 1. 82858   | coding    |
| MSTRG. 8110. 5  | 2. 44928   | coding    |
| MSTRG. 8113. 1  | -2. 32832  | noncoding |
| MSTRG. 8119. 1  | -0. 769762 | noncoding |
| MSTRG. 8119. 2  | 0. 479711  | coding    |
| MSTRG. 8130. 1  | -0. 10562  | noncoding |
| MSTRG. 8131. 3  | 1. 10442   | coding    |
| MSTRG. 8131. 4  | 0. 64351   | coding    |

|                 |            |           |
|-----------------|------------|-----------|
| MSTRG. 8131. 5  | 0. 639612  | coding    |
| MSTRG. 8131. 6  | 0. 606926  | coding    |
| MSTRG. 8131. 7  | 0. 651684  | coding    |
| MSTRG. 8117. 3  | 1. 55985   | coding    |
| MSTRG. 8143. 1  | 0. 894293  | coding    |
| MSTRG. 8145. 1  | -1. 58489  | noncoding |
| MSTRG. 8146. 1  | -1. 85977  | noncoding |
| MSTRG. 8147. 2  | 0. 460171  | coding    |
| MSTRG. 8160. 2  | -2. 02806  | noncoding |
| MSTRG. 8160. 1  | -0. 157251 | noncoding |
| MSTRG. 8160. 3  | 0. 798669  | coding    |
| MSTRG. 8160. 4  | -0. 245551 | noncoding |
| MSTRG. 8165. 1  | 0. 987811  | coding    |
| MSTRG. 8165. 3  | 1. 04698   | coding    |
| MSTRG. 8171. 1  | -2. 26469  | noncoding |
| MSTRG. 8171. 2  | -1. 51419  | noncoding |
| MSTRG. 8172. 11 | -0. 663951 | noncoding |
| MSTRG. 8172. 7  | -1. 92833  | noncoding |
| MSTRG. 8172. 6  | 0. 291544  | coding    |
| MSTRG. 8172. 9  | 0. 679276  | coding    |
| MSTRG. 8172. 10 | 0. 280041  | coding    |
| MSTRG. 8172. 5  | 0. 030048  | coding    |
| MSTRG. 8172. 8  | 0. 542854  | coding    |
| MSTRG. 8172. 4  | 0. 802206  | coding    |
| MSTRG. 8172. 3  | 1. 39188   | coding    |
| MSTRG. 8172. 13 | 0. 773363  | coding    |
| MSTRG. 8172. 12 | 0. 823     | coding    |
| MSTRG. 8172. 14 | 1. 24768   | coding    |
| MSTRG. 8172. 15 | 0. 191489  | coding    |
| MSTRG. 8185. 2  | 0. 969508  | coding    |
| MSTRG. 8185. 1  | 0. 72836   | coding    |
| MSTRG. 8185. 3  | 0. 760894  | coding    |
| MSTRG. 8195. 1  | 1. 73692   | coding    |
| MSTRG. 8195. 2  | 1. 19607   | coding    |
| MSTRG. 8190. 2  | -2. 0544   | noncoding |
| MSTRG. 8198. 1  | -2. 41741  | noncoding |
| MSTRG. 8201. 1  | 0. 079517  | coding    |
| MSTRG. 8201. 2  | 0. 516686  | coding    |
| MSTRG. 8202. 1  | 0. 905703  | coding    |
| MSTRG. 8200. 2  | 2. 61858   | coding    |
| MSTRG. 8200. 3  | -1. 57811  | noncoding |
| MSTRG. 8203. 1  | -2. 58755  | noncoding |
| MSTRG. 8209. 1  | -0. 06287  | noncoding |
| MSTRG. 8209. 2  | -0. 242937 | noncoding |
| MSTRG. 8210. 1  | -1. 29754  | noncoding |
| MSTRG. 8218. 1  | 0. 811753  | coding    |
| MSTRG. 8219. 1  | -2. 03466  | noncoding |
| MSTRG. 8224. 3  | -0. 117555 | noncoding |
| MSTRG. 8221. 1  | -1. 30189  | noncoding |
| MSTRG. 8221. 2  | -1. 31189  | noncoding |
| MSTRG. 8238. 1  | 1. 48146   | coding    |
| MSTRG. 8238. 2  | 1. 24026   | coding    |
| MSTRG. 8238. 5  | 1. 56419   | coding    |
| MSTRG. 8238. 6  | 1. 57705   | coding    |



|                 |            |           |
|-----------------|------------|-----------|
| MSTRG. 8238. 7  | 1. 33624   | coding    |
| MSTRG. 8238. 8  | 0. 417051  | coding    |
| MSTRG. 8239. 1  | 0. 105232  | coding    |
| MSTRG. 8241. 3  | 0. 180209  | coding    |
| MSTRG. 8241. 2  | 2. 27291   | coding    |
| MSTRG. 8241. 4  | 2. 51428   | coding    |
| MSTRG. 8242. 1  | 0. 297817  | coding    |
| MSTRG. 8241. 5  | 1. 28185   | coding    |
| MSTRG. 8241. 6  | 1. 98841   | coding    |
| MSTRG. 8244. 1  | -1. 20982  | noncoding |
| MSTRG. 8241. 7  | 1. 93769   | coding    |
| MSTRG. 8241. 8  | 1. 83552   | coding    |
| MSTRG. 8246. 2  | -1. 99606  | noncoding |
| MSTRG. 8246. 6  | 0. 103902  | coding    |
| MSTRG. 8246. 5  | 0. 187074  | coding    |
| MSTRG. 8246. 4  | 0. 403493  | coding    |
| MSTRG. 8248. 1  | -0. 642466 | noncoding |
| MSTRG. 8246. 7  | -0. 744557 | noncoding |
| MSTRG. 8249. 1  | -0. 655247 | noncoding |
| MSTRG. 8255. 1  | -1. 94531  | noncoding |
| MSTRG. 8283. 3  | 1. 9931    | coding    |
| MSTRG. 8283. 5  | 1. 78265   | coding    |
| MSTRG. 8283. 6  | 1. 79275   | coding    |
| MSTRG. 8283. 7  | 1. 36017   | coding    |
| MSTRG. 8283. 8  | -1. 04491  | noncoding |
| MSTRG. 8283. 9  | 0. 263873  | coding    |
| MSTRG. 8283. 10 | -0. 500839 | noncoding |
| MSTRG. 8283. 12 | 0. 30984   | coding    |
| MSTRG. 8283. 13 | 0. 70847   | coding    |
| MSTRG. 8285. 3  | 2. 00767   | coding    |
| MSTRG. 8395. 1  | -2. 20589  | noncoding |
| MSTRG. 8397. 1  | -0. 314488 | noncoding |
| MSTRG. 8409. 1  | 0. 341125  | coding    |
| MSTRG. 8410. 1  | -0. 760059 | noncoding |
| MSTRG. 8411. 1  | 0. 684466  | coding    |
| MSTRG. 8412. 1  | -0. 38138  | noncoding |
| MSTRG. 8417. 2  | 0. 228371  | coding    |
| MSTRG. 8419. 1  | -1. 37936  | noncoding |
| MSTRG. 8394. 2  | 0. 665428  | coding    |
| MSTRG. 8394. 3  | -0. 497897 | noncoding |
| MSTRG. 8420. 1  | 0. 18978   | coding    |
| MSTRG. 8422. 1  | -0. 744486 | noncoding |
| MSTRG. 8423. 1  | -1. 12465  | noncoding |
| MSTRG. 8424. 1  | 0. 661418  | coding    |
| MSTRG. 8425. 1  | -0. 141543 | noncoding |
| MSTRG. 8394. 4  | 0. 485092  | coding    |
| MSTRG. 8394. 5  | 1. 00754   | coding    |
| MSTRG. 8394. 6  | 0. 75944   | coding    |
| MSTRG. 8394. 7  | -1. 43155  | noncoding |
| MSTRG. 8394. 8  | -0. 368712 | noncoding |
| MSTRG. 8394. 9  | -0. 823126 | noncoding |
| MSTRG. 8282. 1  | -2. 40519  | noncoding |
| MSTRG. 8309. 1  | 0. 226173  | coding    |
| MSTRG. 8315. 1  | -2. 14223  | noncoding |

|                 |           |           |
|-----------------|-----------|-----------|
| MSTRG. 8316. 1  | -1.40698  | noncoding |
| MSTRG. 8315. 2  | 0.446016  | coding    |
| MSTRG. 8324. 3  | -0.708787 | noncoding |
| MSTRG. 8324. 4  | -1.02197  | noncoding |
| MSTRG. 8333. 2  | -0.323451 | noncoding |
| MSTRG. 8333. 3  | 0.807214  | coding    |
| MSTRG. 8333. 4  | 1.27941   | coding    |
| MSTRG. 8333. 5  | 0.737363  | coding    |
| MSTRG. 8337. 1  | -1.02325  | noncoding |
| MSTRG. 8338. 2  | -0.705157 | noncoding |
| MSTRG. 8346. 2  | 2.51525   | coding    |
| MSTRG. 8349. 6  | 0.683718  | coding    |
| MSTRG. 8351. 1  | -1.7468   | noncoding |
| MSTRG. 8351. 5  | 0.599809  | coding    |
| MSTRG. 8352. 3  | 3.01057   | coding    |
| MSTRG. 8352. 4  | 0.654626  | coding    |
| MSTRG. 8353. 1  | 1.81791   | coding    |
| MSTRG. 8353. 2  | 2.16497   | coding    |
| MSTRG. 8353. 4  | 1.34733   | coding    |
| MSTRG. 8353. 6  | 1.3068    | coding    |
| MSTRG. 8353. 5  | 2.34142   | coding    |
| MSTRG. 8353. 7  | 2.42894   | coding    |
| MSTRG. 8353. 8  | 2.35899   | coding    |
| MSTRG. 8354. 1  | 0.452145  | coding    |
| MSTRG. 8355. 1  | -0.87432  | noncoding |
| MSTRG. 8356. 1  | -0.230987 | noncoding |
| MSTRG. 8340. 1  | -1.56652  | noncoding |
| MSTRG. 8343. 1  | -2.00651  | noncoding |
| MSTRG. 8359. 5  | 0.804346  | coding    |
| MSTRG. 8359. 3  | 1.94809   | coding    |
| MSTRG. 8359. 4  | 2.3227    | coding    |
| MSTRG. 8360. 1  | -2.28813  | noncoding |
| MSTRG. 8365. 1  | -0.880857 | noncoding |
| MSTRG. 8358. 1  | -1.21447  | noncoding |
| MSTRG. 8386. 1  | 2.36246   | coding    |
| MSTRG. 8387. 1  | -1.85367  | noncoding |
| MSTRG. 8392. 1  | -2.06194  | noncoding |
| MSTRG. 8432. 1  | 0.955546  | coding    |
| MSTRG. 8430. 1  | -1.23656  | noncoding |
| MSTRG. 8444. 1  | 1.755     | coding    |
| MSTRG. 8444. 2  | 1.09868   | coding    |
| MSTRG. 8444. 3  | 1.365     | coding    |
| MSTRG. 8444. 7  | 0.758727  | coding    |
| MSTRG. 8444. 5  | 2.46848   | coding    |
| MSTRG. 8444. 6  | 2.21097   | coding    |
| MSTRG. 8444. 8  | 1.14988   | coding    |
| MSTRG. 8444. 9  | 1.6493    | coding    |
| MSTRG. 8444. 10 | 1.38436   | coding    |
| MSTRG. 8444. 11 | 1.45142   | coding    |
| MSTRG. 8445. 1  | 2.25253   | coding    |
| MSTRG. 8445. 3  | 0.758132  | coding    |
| MSTRG. 8437. 1  | 1.98963   | coding    |
| MSTRG. 8439. 2  | -0.108289 | noncoding |
| MSTRG. 8446. 5  | 1.5579    | coding    |

|                 |            |           |
|-----------------|------------|-----------|
| MSTRG. 8446. 7  | 1. 2422    | coding    |
| MSTRG. 8460. 1  | -2. 66629  | noncoding |
| MSTRG. 8482. 1  | 1. 29459   | coding    |
| MSTRG. 8486. 1  | -1. 29278  | noncoding |
| MSTRG. 8488. 1  | -1. 4971   | noncoding |
| MSTRG. 8488. 2  | -1. 22916  | noncoding |
| MSTRG. 8488. 3  | -1. 55716  | noncoding |
| MSTRG. 8488. 4  | -2. 06438  | noncoding |
| MSTRG. 8495. 1  | -1. 46669  | noncoding |
| MSTRG. 8494. 5  | 2. 00131   | coding    |
| MSTRG. 8493. 1  | -2. 35016  | noncoding |
| MSTRG. 8499. 1  | 2. 01607   | coding    |
| MSTRG. 8506. 1  | 0. 317055  | coding    |
| MSTRG. 8507. 1  | -0. 269917 | noncoding |
| MSTRG. 8508. 1  | -0. 435284 | noncoding |
| MSTRG. 8509. 1  | -1. 66412  | noncoding |
| MSTRG. 8512. 2  | 2. 72362   | coding    |
| MSTRG. 8512. 3  | 2. 59537   | coding    |
| MSTRG. 8512. 4  | 2. 40185   | coding    |
| MSTRG. 8502. 3  | 1. 64561   | coding    |
| MSTRG. 8515. 3  | 1. 16209   | coding    |
| MSTRG. 8517. 2  | 1. 04001   | coding    |
| MSTRG. 8520. 1  | -0. 253113 | noncoding |
| MSTRG. 8521. 1  | -0. 408571 | noncoding |
| MSTRG. 8522. 1  | -1. 12911  | noncoding |
| MSTRG. 8524. 1  | -0. 62776  | noncoding |
| MSTRG. 8526. 2  | 2. 03204   | coding    |
| MSTRG. 8527. 1  | 1. 31704   | coding    |
| MSTRG. 8526. 3  | -0. 111759 | noncoding |
| MSTRG. 8528. 1  | -0. 507129 | noncoding |
| MSTRG. 8529. 1  | 2. 20631   | coding    |
| MSTRG. 8529. 2  | 2. 29052   | coding    |
| MSTRG. 8529. 3  | 2. 14099   | coding    |
| MSTRG. 8529. 4  | 1. 07688   | coding    |
| MSTRG. 8529. 5  | 1. 74229   | coding    |
| MSTRG. 8529. 7  | 2. 17459   | coding    |
| MSTRG. 8534. 9  | 3. 99231   | coding    |
| MSTRG. 8534. 10 | 3. 65354   | coding    |
| MSTRG. 8534. 11 | 2. 66091   | coding    |
| MSTRG. 8536. 1  | 0. 39107   | coding    |
| MSTRG. 8536. 2  | -0. 006866 | noncoding |
| MSTRG. 8538. 5  | 2. 24343   | coding    |
| MSTRG. 8539. 3  | 2. 11221   | coding    |
| MSTRG. 8539. 4  | 2. 24197   | coding    |
| MSTRG. 8539. 5  | 1. 54071   | coding    |
| MSTRG. 8543. 1  | -0. 946549 | noncoding |
| MSTRG. 8544. 1  | -0. 709396 | noncoding |
| MSTRG. 8542. 2  | -0. 592126 | noncoding |
| MSTRG. 8547. 1  | -1. 14274  | noncoding |
| MSTRG. 8548. 3  | 2. 04057   | coding    |
| MSTRG. 8548. 2  | 2. 10979   | coding    |
| MSTRG. 8556. 1  | -1. 57854  | noncoding |
| MSTRG. 8557. 3  | 1. 06532   | coding    |
| MSTRG. 8557. 2  | 1. 05092   | coding    |

|                 |            |           |
|-----------------|------------|-----------|
| MSTRG. 8557. 5  | 1. 06034   | coding    |
| MSTRG. 8554. 1  | -0. 917618 | noncoding |
| MSTRG. 8555. 1  | -1. 29666  | noncoding |
| MSTRG. 8565. 1  | -1. 83003  | noncoding |
| MSTRG. 8565. 2  | -0. 960523 | noncoding |
| MSTRG. 8566. 1  | -2. 1832   | noncoding |
| MSTRG. 8566. 2  | -2. 2685   | noncoding |
| MSTRG. 8585. 1  | -1. 65412  | noncoding |
| MSTRG. 8587. 1  | -2. 26605  | noncoding |
| MSTRG. 8589. 1  | -0. 787686 | noncoding |
| MSTRG. 8586. 1  | -1. 69581  | noncoding |
| MSTRG. 8591. 2  | 1. 64047   | coding    |
| MSTRG. 8594. 2  | 2. 50377   | coding    |
| MSTRG. 8595. 1  | -2. 14052  | noncoding |
| MSTRG. 8598. 3  | 2. 24818   | coding    |
| MSTRG. 8598. 4  | 2. 26505   | coding    |
| MSTRG. 8600. 3  | 1. 09234   | coding    |
| MSTRG. 8601. 1  | -1. 27621  | noncoding |
| MSTRG. 8604. 1  | -1. 29021  | noncoding |
| MSTRG. 8604. 2  | -1. 5632   | noncoding |
| MSTRG. 8605. 4  | 0. 341465  | coding    |
| MSTRG. 8605. 8  | -0. 342488 | noncoding |
| MSTRG. 8605. 5  | 0. 896364  | coding    |
| MSTRG. 8605. 6  | 0. 838327  | coding    |
| MSTRG. 8606. 3  | 0. 987903  | coding    |
| MSTRG. 8606. 5  | 0. 692724  | coding    |
| MSTRG. 8606. 4  | 0. 759789  | coding    |
| MSTRG. 8608. 1  | 1. 53635   | coding    |
| MSTRG. 8611. 3  | -0. 638024 | noncoding |
| MSTRG. 8613. 1  | -2. 71408  | noncoding |
| MSTRG. 8617. 1  | 0. 266996  | coding    |
| MSTRG. 8614. 2  | 0. 962554  | coding    |
| MSTRG. 8614. 3  | 0. 115869  | coding    |
| MSTRG. 8624. 10 | 2. 00031   | coding    |
| MSTRG. 8624. 11 | 2. 07122   | coding    |
| MSTRG. 8624. 12 | 2. 04268   | coding    |
| MSTRG. 8624. 13 | 2. 07463   | coding    |
| MSTRG. 8620. 1  | -2. 11025  | noncoding |
| MSTRG. 8629. 1  | -0. 83278  | noncoding |
| MSTRG. 8630. 1  | 0. 147638  | coding    |
| MSTRG. 8630. 2  | -0. 804858 | noncoding |
| MSTRG. 8632. 1  | -1. 87525  | noncoding |
| MSTRG. 8645. 5  | 0. 666843  | coding    |
| MSTRG. 8645. 4  | 1. 19736   | coding    |
| MSTRG. 8645. 6  | 0. 185631  | coding    |
| MSTRG. 8646. 1  | -1. 42418  | noncoding |
| MSTRG. 8642. 2  | 0. 689415  | coding    |
| MSTRG. 8647. 1  | 0. 697939  | coding    |
| MSTRG. 8647. 3  | 2. 13407   | coding    |
| MSTRG. 8648. 1  | 2. 698     | coding    |
| MSTRG. 8650. 2  | 1. 9566    | coding    |
| MSTRG. 8650. 1  | 1. 75718   | coding    |
| MSTRG. 8650. 4  | -0. 773008 | noncoding |
| MSTRG. 8650. 3  | 1. 78056   | coding    |

|                 |            |           |
|-----------------|------------|-----------|
| MSTRG. 8656. 3  | 2. 09097   | coding    |
| MSTRG. 8657. 1  | 1. 28028   | coding    |
| MSTRG. 8657. 2  | 1. 40815   | coding    |
| MSTRG. 8658. 1  | 1. 5284    | coding    |
| MSTRG. 8658. 3  | 1. 01084   | coding    |
| MSTRG. 8657. 3  | 1. 01219   | coding    |
| MSTRG. 8657. 4  | 0. 901311  | coding    |
| MSTRG. 8657. 6  | 1. 10966   | coding    |
| MSTRG. 8657. 7  | 0. 817842  | coding    |
| MSTRG. 8659. 2  | -1. 37482  | noncoding |
| MSTRG. 8660. 2  | 1. 15995   | coding    |
| MSTRG. 8660. 3  | 1. 25741   | coding    |
| MSTRG. 8660. 4  | 1. 39646   | coding    |
| MSTRG. 8660. 10 | 0. 761944  | coding    |
| MSTRG. 8660. 11 | 1. 00358   | coding    |
| MSTRG. 8660. 8  | 0. 798081  | coding    |
| MSTRG. 8660. 9  | 0. 703485  | coding    |
| MSTRG. 8652. 1  | 0. 31171   | coding    |
| MSTRG. 8652. 2  | -0. 225701 | noncoding |
| MSTRG. 8674. 2  | 1. 65145   | coding    |
| MSTRG. 8674. 1  | 2. 62858   | coding    |
| MSTRG. 8674. 3  | 2. 783     | coding    |
| MSTRG. 8674. 4  | 2. 65305   | coding    |
| MSTRG. 8674. 8  | 0. 620927  | coding    |
| MSTRG. 8674. 7  | 1. 14591   | coding    |
| MSTRG. 8677. 5  | -0. 604491 | noncoding |
| MSTRG. 8677. 3  | -0. 601025 | noncoding |
| MSTRG. 8677. 4  | -0. 968136 | noncoding |
| MSTRG. 8677. 8  | -0. 925883 | noncoding |
| MSTRG. 8677. 9  | -0. 877348 | noncoding |
| MSTRG. 8677. 10 | -1. 15849  | noncoding |
| MSTRG. 8678. 2  | 2. 51479   | coding    |
| MSTRG. 8680. 3  | 2. 88646   | coding    |
| MSTRG. 8680. 2  | 2. 90686   | coding    |
| MSTRG. 8686. 1  | -2. 3618   | noncoding |
| MSTRG. 8701. 1  | 1. 72905   | coding    |
| MSTRG. 8701. 2  | 1. 68218   | coding    |
| MSTRG. 8716. 1  | 0. 756891  | coding    |
| MSTRG. 8713. 1  | -2. 0732   | noncoding |
| MSTRG. 8732. 1  | 0. 017505  | coding    |
| MSTRG. 8733. 1  | -1. 57295  | noncoding |
| MSTRG. 8733. 2  | 0. 23309   | coding    |
| MSTRG. 8733. 3  | 0. 15318   | coding    |
| MSTRG. 8734. 1  | 1. 9088    | coding    |
| MSTRG. 8729. 1  | 0. 393996  | coding    |
| MSTRG. 8742. 1  | 2. 01117   | coding    |
| MSTRG. 8742. 3  | 1. 30696   | coding    |
| MSTRG. 8742. 6  | 2. 36664   | coding    |
| MSTRG. 8742. 7  | 2. 28733   | coding    |
| MSTRG. 8742. 8  | 2. 07863   | coding    |
| MSTRG. 8742. 9  | 1. 99404   | coding    |
| MSTRG. 8764. 1  | -0. 533281 | noncoding |
| MSTRG. 8765. 1  | 0. 318557  | coding    |
| MSTRG. 8765. 2  | 0. 133426  | coding    |

|                 |           |           |
|-----------------|-----------|-----------|
| MSTRG. 8766. 1  | -0.021418 | noncoding |
| MSTRG. 8765. 4  | -0.834037 | noncoding |
| MSTRG. 8748. 4  | 1.50574   | coding    |
| MSTRG. 8748. 6  | 0.957635  | coding    |
| MSTRG. 8768. 3  | -0.355299 | noncoding |
| MSTRG. 8769. 1  | 1.18061   | coding    |
| MSTRG. 8785. 1  | 1.29842   | coding    |
| MSTRG. 8785. 2  | 1.32877   | coding    |
| MSTRG. 8785. 3  | 1.29913   | coding    |
| MSTRG. 8786. 7  | 1.4554    | coding    |
| MSTRG. 8786. 13 | 1.42939   | coding    |
| MSTRG. 8786. 8  | 1.55094   | coding    |
| MSTRG. 8786. 12 | 1.94593   | coding    |
| MSTRG. 8786. 10 | 1.44416   | coding    |
| MSTRG. 8786. 11 | 1.47937   | coding    |
| MSTRG. 8786. 9  | 1.38972   | coding    |
| MSTRG. 8786. 15 | 0.548578  | coding    |
| MSTRG. 8787. 1  | 0.423175  | coding    |
| MSTRG. 8789. 1  | 1.74771   | coding    |
| MSTRG. 8803. 1  | 1.16695   | coding    |
| MSTRG. 8808. 2  | 1.28384   | coding    |
| MSTRG. 8809. 1  | 1.19068   | coding    |
| MSTRG. 8809. 4  | 2.26022   | coding    |
| MSTRG. 8818. 3  | 0.463621  | coding    |
| MSTRG. 8815. 1  | -1.57949  | noncoding |
| MSTRG. 8815. 2  | -2.00048  | noncoding |
| MSTRG. 8815. 3  | -2.01368  | noncoding |
| MSTRG. 8815. 4  | -1.47278  | noncoding |
| MSTRG. 8825. 6  | 1.71156   | coding    |
| MSTRG. 8825. 7  | 1.62107   | coding    |
| MSTRG. 8825. 8  | 1.11367   | coding    |
| MSTRG. 8826. 4  | 2.47474   | coding    |
| MSTRG. 8823. 1  | -0.305688 | noncoding |
| MSTRG. 8833. 1  | 0.61873   | coding    |
| MSTRG. 8833. 2  | 1.10779   | coding    |
| MSTRG. 8833. 3  | 0.623875  | coding    |
| MSTRG. 8833. 4  | 1.07054   | coding    |
| MSTRG. 8833. 5  | 0.611849  | coding    |
| MSTRG. 8833. 6  | 1.08487   | coding    |
| MSTRG. 8833. 7  | 0.79766   | coding    |
| MSTRG. 8833. 8  | 0.696893  | coding    |
| MSTRG. 8830. 1  | -0.640799 | noncoding |
| MSTRG. 8835. 1  | -0.567909 | noncoding |
| MSTRG. 8836. 1  | -0.383114 | noncoding |
| MSTRG. 8838. 1  | 1.73619   | coding    |
| MSTRG. 8839. 1  | 1.41332   | coding    |
| MSTRG. 8842. 1  | -0.033953 | noncoding |
| MSTRG. 8846. 3  | 2.21988   | coding    |
| MSTRG. 8846. 4  | 2.43935   | coding    |
| MSTRG. 8846. 5  | 1.86503   | coding    |
| MSTRG. 8846. 6  | 1.88295   | coding    |
| MSTRG. 8849. 1  | -2.00572  | noncoding |
| MSTRG. 8844. 1  | -0.235657 | noncoding |
| MSTRG. 8844. 2  | 0.579006  | coding    |

|                 |            |           |
|-----------------|------------|-----------|
| MSTRG. 8853. 1  | -1. 49789  | noncoding |
| MSTRG. 8853. 2  | -1. 6642   | noncoding |
| MSTRG. 8853. 3  | -1. 55549  | noncoding |
| MSTRG. 8853. 4  | -2. 15092  | noncoding |
| MSTRG. 8857. 1  | -2. 36961  | noncoding |
| MSTRG. 8862. 1  | -0. 867222 | noncoding |
| MSTRG. 8862. 2  | 1. 25603   | coding    |
| MSTRG. 8863. 1  | 0. 514909  | coding    |
| MSTRG. 8864. 1  | 0. 689099  | coding    |
| MSTRG. 8865. 1  | -0. 455311 | noncoding |
| MSTRG. 8881. 2  | 0. 014193  | coding    |
| MSTRG. 8888. 1  | 1. 18493   | coding    |
| MSTRG. 8893. 1  | -0. 411258 | noncoding |
| MSTRG. 8894. 1  | 0. 265534  | coding    |
| MSTRG. 8898. 11 | 2. 0798    | coding    |
| MSTRG. 8898. 12 | 2. 06613   | coding    |
| MSTRG. 8898. 13 | 1. 90789   | coding    |
| MSTRG. 8902. 1  | 2. 46257   | coding    |
| MSTRG. 8896. 1  | -0. 395955 | noncoding |
| MSTRG. 8912. 1  | 1. 9617    | coding    |
| MSTRG. 8912. 2  | 0. 955409  | coding    |
| MSTRG. 8913. 1  | -1. 30195  | noncoding |
| MSTRG. 8913. 2  | -1. 33708  | noncoding |
| MSTRG. 8914. 1  | 1. 362     | coding    |
| MSTRG. 8914. 2  | 1. 53393   | coding    |
| MSTRG. 8908. 1  | -1. 11765  | noncoding |
| MSTRG. 8916. 1  | -1. 36464  | noncoding |
| MSTRG. 8919. 5  | 2. 47167   | coding    |
| MSTRG. 8919. 3  | 2. 50163   | coding    |
| MSTRG. 8919. 1  | 2. 41857   | coding    |
| MSTRG. 8919. 2  | 2. 37319   | coding    |
| MSTRG. 8919. 6  | 2. 3566    | coding    |
| MSTRG. 8919. 7  | 2. 35514   | coding    |
| MSTRG. 8919. 8  | 2. 35274   | coding    |
| MSTRG. 8919. 9  | 2. 22578   | coding    |
| MSTRG. 8920. 1  | -1. 29359  | noncoding |
| MSTRG. 8920. 2  | -1. 32139  | noncoding |
| MSTRG. 8918. 2  | 1. 91708   | coding    |
| MSTRG. 8932. 2  | 0. 864634  | coding    |
| MSTRG. 8941. 1  | 0. 7516    | coding    |
| MSTRG. 8943. 1  | 1. 28488   | coding    |
| MSTRG. 8943. 2  | 1. 14937   | coding    |
| MSTRG. 8943. 3  | 2. 14189   | coding    |
| MSTRG. 8943. 4  | 1. 99052   | coding    |
| MSTRG. 8943. 5  | 2. 19839   | coding    |
| MSTRG. 8943. 6  | 1. 04359   | coding    |
| MSTRG. 8943. 7  | 1. 44475   | coding    |
| MSTRG. 8943. 8  | 2. 05049   | coding    |
| MSTRG. 8943. 9  | 1. 83501   | coding    |
| MSTRG. 8943. 10 | 2. 02993   | coding    |
| MSTRG. 8943. 11 | 1. 72498   | coding    |
| MSTRG. 8943. 12 | 1. 77719   | coding    |
| MSTRG. 8943. 13 | 1. 786     | coding    |
| MSTRG. 8923. 1  | 0. 193471  | coding    |

|                 |           |           |
|-----------------|-----------|-----------|
| MSTRG. 8923. 4  | -0.291642 | noncoding |
| MSTRG. 8923. 3  | -0.367275 | noncoding |
| MSTRG. 8924. 1  | -1.80412  | noncoding |
| MSTRG. 8928. 5  | 1.45833   | coding    |
| MSTRG. 8929. 1  | 0.758089  | coding    |
| MSTRG. 8949. 1  | -1.18922  | noncoding |
| MSTRG. 8949. 2  | -2.21795  | noncoding |
| MSTRG. 8951. 2  | 2.42619   | coding    |
| MSTRG. 8952. 1  | -1.60996  | noncoding |
| MSTRG. 8954. 1  | 0.175516  | coding    |
| MSTRG. 8955. 1  | -1.66683  | noncoding |
| MSTRG. 8957. 1  | -1.78399  | noncoding |
| MSTRG. 8961. 2  | -1.06473  | noncoding |
| MSTRG. 8962. 2  | -1.2257   | noncoding |
| MSTRG. 8962. 3  | -0.146182 | noncoding |
| MSTRG. 8966. 1  | -0.34099  | noncoding |
| MSTRG. 8967. 3  | 0.922738  | coding    |
| MSTRG. 8971. 2  | 1.39544   | coding    |
| MSTRG. 8972. 2  | 0.833067  | coding    |
| MSTRG. 8976. 1  | -2.57796  | noncoding |
| MSTRG. 8981. 1  | -2.08348  | noncoding |
| MSTRG. 8994. 1  | 3.13992   | coding    |
| MSTRG. 8994. 6  | 3.34244   | coding    |
| MSTRG. 8994. 2  | 3.781     | coding    |
| MSTRG. 8994. 4  | 3.33601   | coding    |
| MSTRG. 8994. 7  | -0.061703 | noncoding |
| MSTRG. 8995. 1  | 0.516229  | coding    |
| MSTRG. 8996. 1  | -1.50288  | noncoding |
| MSTRG. 8996. 2  | -0.798678 | noncoding |
| MSTRG. 8996. 3  | -1.63038  | noncoding |
| MSTRG. 9002. 2  | 1.30058   | coding    |
| MSTRG. 9000. 2  | -0.000319 | noncoding |
| MSTRG. 9000. 3  | 1.99667   | coding    |
| MSTRG. 9000. 4  | 1.64793   | coding    |
| MSTRG. 9003. 2  | 1.0045    | coding    |
| MSTRG. 9010. 1  | 0.991468  | coding    |
| MSTRG. 9010. 2  | 1.29367   | coding    |
| MSTRG. 9010. 3  | 1.19292   | coding    |
| MSTRG. 9010. 4  | 1.20457   | coding    |
| MSTRG. 9010. 5  | 1.497     | coding    |
| MSTRG. 9010. 6  | 1.09037   | coding    |
| MSTRG. 9010. 7  | 1.79905   | coding    |
| MSTRG. 9010. 9  | 1.30569   | coding    |
| MSTRG. 9010. 10 | 1.03157   | coding    |
| MSTRG. 9010. 11 | 0.285664  | coding    |
| MSTRG. 9010. 12 | 0.269555  | coding    |
| MSTRG. 9010. 13 | 0.151306  | coding    |
| MSTRG. 9005. 1  | -2.12029  | noncoding |
| MSTRG. 9008. 1  | -1.14837  | noncoding |
| MSTRG. 9011. 1  | -0.341597 | noncoding |
| MSTRG. 9025. 1  | 0.840388  | coding    |
| MSTRG. 9027. 2  | -1.2563   | noncoding |
| MSTRG. 9029. 3  | 0.979651  | coding    |
| MSTRG. 9029. 4  | 1.79822   | coding    |



|                 |            |           |
|-----------------|------------|-----------|
| MSTRG. 9029. 5  | 0. 186451  | coding    |
| MSTRG. 9034. 1  | 1. 60654   | coding    |
| MSTRG. 9034. 2  | 2. 93458   | coding    |
| MSTRG. 9036. 2  | 0. 428613  | coding    |
| MSTRG. 9036. 3  | 0. 165575  | coding    |
| MSTRG. 9038. 1  | -2. 08068  | noncoding |
| MSTRG. 9040. 3  | 1. 53      | coding    |
| MSTRG. 9040. 4  | 2. 16441   | coding    |
| MSTRG. 9041. 1  | 1. 36067   | coding    |
| MSTRG. 9041. 2  | 1. 44959   | coding    |
| MSTRG. 9042. 1  | -1. 04505  | noncoding |
| MSTRG. 9042. 2  | -0. 953372 | noncoding |
| MSTRG. 9043. 1  | -1. 9842   | noncoding |
| MSTRG. 9045. 2  | -0. 633101 | noncoding |
| MSTRG. 9046. 2  | 1. 1118    | coding    |
| MSTRG. 9050. 1  | 1. 19034   | coding    |
| MSTRG. 9051. 1  | -0. 771817 | noncoding |
| MSTRG. 9053. 3  | -1. 36291  | noncoding |
| MSTRG. 9053. 5  | -1. 36576  | noncoding |
| MSTRG. 9053. 6  | -0. 509689 | noncoding |
| MSTRG. 9053. 4  | 1. 45916   | coding    |
| MSTRG. 9053. 7  | 0. 358794  | coding    |
| MSTRG. 9054. 1  | -0. 877837 | noncoding |
| MSTRG. 9055. 1  | 1. 68896   | coding    |
| MSTRG. 9055. 4  | 1. 61391   | coding    |
| MSTRG. 9058. 1  | 2. 05573   | coding    |
| MSTRG. 9058. 2  | 1. 36395   | coding    |
| MSTRG. 9058. 3  | 1. 70114   | coding    |
| MSTRG. 9058. 4  | 0. 531828  | coding    |
| MSTRG. 9058. 8  | 1. 37317   | coding    |
| MSTRG. 9058. 10 | 1. 5615    | coding    |
| MSTRG. 9058. 11 | 1. 49122   | coding    |
| MSTRG. 9058. 5  | 1. 14541   | coding    |
| MSTRG. 9058. 6  | 1. 42791   | coding    |
| MSTRG. 9058. 7  | 0. 955921  | coding    |
| MSTRG. 9058. 9  | 1. 54782   | coding    |
| MSTRG. 9058. 12 | 1. 67454   | coding    |
| MSTRG. 9058. 14 | 1. 57788   | coding    |
| MSTRG. 9059. 3  | -1. 57942  | noncoding |
| MSTRG. 9059. 2  | 2. 41354   | coding    |
| MSTRG. 9062. 6  | 0. 766271  | coding    |
| MSTRG. 9056. 2  | 0. 011028  | coding    |
| MSTRG. 9081. 6  | -0. 408016 | noncoding |
| MSTRG. 9081. 7  | 2. 53388   | coding    |
| MSTRG. 9081. 5  | 1. 9988    | coding    |
| MSTRG. 9081. 3  | 2. 55117   | coding    |
| MSTRG. 9081. 1  | 2. 48562   | coding    |
| MSTRG. 9081. 4  | 2. 50917   | coding    |
| MSTRG. 9081. 8  | 2. 49385   | coding    |
| MSTRG. 9081. 9  | 2. 34544   | coding    |
| MSTRG. 9081. 10 | 1. 52105   | coding    |
| MSTRG. 9081. 11 | 0. 563614  | coding    |
| MSTRG. 9081. 12 | 0. 100691  | coding    |
| MSTRG. 9082. 1  | 1. 10705   | coding    |

|                 |            |           |
|-----------------|------------|-----------|
| MSTRG. 9082. 2  | 0. 965177  | coding    |
| MSTRG. 9083. 1  | -1. 11893  | noncoding |
| MSTRG. 9084. 1  | -0. 743349 | noncoding |
| MSTRG. 9083. 10 | 0. 758824  | coding    |
| MSTRG. 9083. 12 | 0. 704095  | coding    |
| MSTRG. 9083. 13 | 0. 726153  | coding    |
| MSTRG. 9083. 15 | 0. 283149  | coding    |
| MSTRG. 9083. 9  | -0. 101192 | noncoding |
| MSTRG. 9083. 4  | 0. 249578  | coding    |
| MSTRG. 9083. 8  | 0. 280139  | coding    |
| MSTRG. 9083. 7  | 0. 368525  | coding    |
| MSTRG. 9083. 16 | -2. 005    | noncoding |
| MSTRG. 9085. 2  | -0. 641054 | noncoding |
| MSTRG. 9072. 1  | -0. 917985 | noncoding |
| MSTRG. 9075. 2  | 0. 739901  | coding    |
| MSTRG. 9089. 1  | 0. 198686  | coding    |
| MSTRG. 9090. 2  | 1. 22789   | coding    |
| MSTRG. 9090. 3  | 1. 24736   | coding    |
| MSTRG. 9091. 4  | 2. 04847   | coding    |
| MSTRG. 9091. 5  | 0. 083842  | coding    |
| MSTRG. 9091. 6  | 0. 308809  | coding    |
| MSTRG. 9091. 8  | 1. 37394   | coding    |
| MSTRG. 9092. 1  | 0. 411001  | coding    |
| MSTRG. 9093. 4  | 1. 41155   | coding    |
| MSTRG. 9094. 2  | 1. 06236   | coding    |
| MSTRG. 9097. 1  | 0. 293591  | coding    |
| MSTRG. 9097. 2  | 0. 349256  | coding    |
| MSTRG. 9103. 5  | 1. 38114   | coding    |
| MSTRG. 9103. 2  | 1. 19659   | coding    |
| MSTRG. 9104. 3  | 1. 25507   | coding    |
| MSTRG. 9104. 4  | 1. 56041   | coding    |
| MSTRG. 9104. 5  | 1. 45504   | coding    |
| MSTRG. 9104. 7  | 1. 22519   | coding    |
| MSTRG. 9104. 6  | 1. 32517   | coding    |
| MSTRG. 9104. 8  | -0. 078906 | noncoding |
| MSTRG. 9100. 2  | -1. 80338  | noncoding |
| MSTRG. 9107. 8  | 0. 984229  | coding    |
| MSTRG. 9107. 6  | 1. 09643   | coding    |
| MSTRG. 9108. 1  | -1. 08245  | noncoding |
| MSTRG. 9111. 1  | -0. 599947 | noncoding |
| MSTRG. 9112. 2  | -0. 759219 | noncoding |
| MSTRG. 9113. 1  | 0. 119748  | coding    |
| MSTRG. 9110. 1  | -0. 421955 | noncoding |
| MSTRG. 9116. 3  | 1. 89185   | coding    |
| MSTRG. 9125. 6  | 0. 89638   | coding    |
| MSTRG. 9125. 2  | 1. 8223    | coding    |
| MSTRG. 9125. 3  | 1. 79955   | coding    |
| MSTRG. 9125. 4  | 1. 83183   | coding    |
| MSTRG. 9125. 5  | 1. 86301   | coding    |
| MSTRG. 9126. 4  | 1. 51954   | coding    |
| MSTRG. 9127. 1  | -0. 133177 | noncoding |
| MSTRG. 9120. 2  | 1. 09687   | coding    |
| MSTRG. 9120. 3  | -0. 119739 | noncoding |
| MSTRG. 9123. 1  | 0. 665777  | coding    |

|                 |            |           |
|-----------------|------------|-----------|
| MSTRG. 9123. 2  | 0. 751909  | coding    |
| MSTRG. 9129. 1  | -1. 12062  | noncoding |
| MSTRG. 9129. 2  | -0. 234019 | noncoding |
| MSTRG. 9128. 1  | -0. 284802 | noncoding |
| MSTRG. 9133. 3  | 2. 47361   | coding    |
| MSTRG. 9136. 1  | -1. 81421  | noncoding |
| MSTRG. 9138. 1  | 1. 45112   | coding    |
| MSTRG. 9138. 3  | 2. 16125   | coding    |
| MSTRG. 9139. 1  | -0. 458502 | noncoding |
| MSTRG. 9138. 4  | 0. 762164  | coding    |
| MSTRG. 9140. 1  | 1. 09356   | coding    |
| MSTRG. 9140. 3  | -0. 144776 | noncoding |
| MSTRG. 9142. 1  | -2. 67636  | noncoding |
| MSTRG. 9145. 3  | 1. 41494   | coding    |
| MSTRG. 9145. 5  | 1. 59314   | coding    |
| MSTRG. 9145. 2  | 1. 53494   | coding    |
| MSTRG. 9145. 4  | 1. 46117   | coding    |
| MSTRG. 9145. 6  | 1. 68077   | coding    |
| MSTRG. 9147. 1  | -0. 607172 | noncoding |
| MSTRG. 9146. 4  | 2. 14159   | coding    |
| MSTRG. 9146. 5  | 1. 33784   | coding    |
| MSTRG. 9144. 3  | 2. 20986   | coding    |
| MSTRG. 9144. 2  | 0. 539107  | coding    |
| MSTRG. 9157. 3  | -0. 219118 | noncoding |
| MSTRG. 9157. 4  | 0. 163765  | coding    |
| MSTRG. 9153. 3  | 3. 23174   | coding    |
| MSTRG. 9148. 1  | -0. 070829 | noncoding |
| MSTRG. 9150. 1  | 0. 597823  | coding    |
| MSTRG. 9150. 2  | 0. 5957    | coding    |
| MSTRG. 9175. 2  | 1. 5139    | coding    |
| MSTRG. 9175. 4  | 1. 31899   | coding    |
| MSTRG. 9175. 10 | 0. 641915  | coding    |
| MSTRG. 9175. 9  | 0. 591567  | coding    |
| MSTRG. 9175. 8  | 1. 24457   | coding    |
| MSTRG. 9167. 2  | 1. 74553   | coding    |
| MSTRG. 9168. 1  | -2. 39498  | noncoding |
| MSTRG. 9188. 1  | -0. 753054 | noncoding |
| MSTRG. 9190. 1  | -0. 211294 | noncoding |
| MSTRG. 9190. 3  | -0. 996653 | noncoding |
| MSTRG. 9190. 2  | -1. 29467  | noncoding |
| MSTRG. 9194. 1  | -0. 32077  | noncoding |
| MSTRG. 9194. 2  | -0. 236834 | noncoding |
| MSTRG. 9193. 3  | 0. 869569  | coding    |
| MSTRG. 9202. 1  | 1. 53241   | coding    |
| MSTRG. 9203. 1  | -0. 07278  | noncoding |
| MSTRG. 9205. 1  | 2. 18252   | coding    |
| MSTRG. 9205. 2  | 1. 84255   | coding    |
| MSTRG. 9206. 1  | -0. 468082 | noncoding |
| MSTRG. 9209. 2  | 1. 14429   | coding    |
| MSTRG. 9209. 3  | 1. 44132   | coding    |
| MSTRG. 9211. 3  | 0. 235331  | coding    |
| MSTRG. 9211. 4  | 1. 0877    | coding    |
| MSTRG. 9217. 2  | -0. 900055 | noncoding |
| MSTRG. 9230. 1  | -1. 60096  | noncoding |

|                 |            |           |
|-----------------|------------|-----------|
| MSTRG. 9231. 1  | 2. 07364   | coding    |
| MSTRG. 9231. 3  | 1. 95572   | coding    |
| MSTRG. 9233. 1  | 1. 41673   | coding    |
| MSTRG. 9233. 5  | 1. 52491   | coding    |
| MSTRG. 9235. 3  | 1. 3705    | coding    |
| MSTRG. 9235. 4  | 1. 64001   | coding    |
| MSTRG. 9239. 6  | 1. 01715   | coding    |
| MSTRG. 9239. 9  | 1. 36867   | coding    |
| MSTRG. 9239. 8  | 1. 26991   | coding    |
| MSTRG. 9240. 1  | -0. 286673 | noncoding |
| MSTRG. 9249. 4  | 1. 95586   | coding    |
| MSTRG. 9249. 5  | 1. 30849   | coding    |
| MSTRG. 9250. 6  | 1. 87256   | coding    |
| MSTRG. 9250. 7  | 1. 38622   | coding    |
| MSTRG. 9250. 8  | 1. 87034   | coding    |
| MSTRG. 9250. 10 | 1. 85044   | coding    |
| MSTRG. 9250. 9  | 0. 656363  | coding    |
| MSTRG. 9258. 3  | 0. 4034    | coding    |
| MSTRG. 9258. 5  | 0. 307     | coding    |
| MSTRG. 9259. 2  | 1. 00728   | coding    |
| MSTRG. 9260. 1  | -0. 302446 | noncoding |
| MSTRG. 9260. 2  | -0. 560708 | noncoding |
| MSTRG. 9256. 3  | 1. 12738   | coding    |
| MSTRG. 9257. 3  | 0. 322051  | coding    |
| MSTRG. 9264. 2  | 0. 891129  | coding    |
| MSTRG. 9266. 1  | 0. 362714  | coding    |
| MSTRG. 9266. 2  | 1. 09216   | coding    |
| MSTRG. 9266. 3  | 1. 0098    | coding    |
| MSTRG. 9267. 2  | 1. 76374   | coding    |
| MSTRG. 9267. 3  | 1. 69921   | coding    |
| MSTRG. 9268. 2  | -0. 314328 | noncoding |
| MSTRG. 9269. 1  | -0. 960229 | noncoding |
| MSTRG. 9298. 1  | 1. 32517   | coding    |
| MSTRG. 9298. 18 | 0. 85821   | coding    |
| MSTRG. 9298. 10 | 1. 09834   | coding    |
| MSTRG. 9298. 17 | 1. 20755   | coding    |
| MSTRG. 9298. 20 | 0. 976196  | coding    |
| MSTRG. 9298. 11 | 0. 799144  | coding    |
| MSTRG. 9298. 12 | 0. 787271  | coding    |
| MSTRG. 9298. 13 | 1. 42719   | coding    |
| MSTRG. 9298. 15 | 0. 585266  | coding    |
| MSTRG. 9298. 16 | 0. 785374  | coding    |
| MSTRG. 9298. 9  | 1. 41436   | coding    |
| MSTRG. 9298. 24 | 0. 624338  | coding    |
| MSTRG. 9298. 26 | 0. 53904   | coding    |
| MSTRG. 9298. 25 | 0. 79416   | coding    |
| MSTRG. 9298. 30 | -1. 07076  | noncoding |
| MSTRG. 9298. 31 | -1. 04593  | noncoding |
| MSTRG. 9298. 29 | 0. 062921  | coding    |
| MSTRG. 9298. 33 | 1. 43489   | coding    |
| MSTRG. 9298. 34 | 1. 40311   | coding    |
| MSTRG. 9298. 35 | -1. 06363  | noncoding |
| MSTRG. 9298. 36 | -0. 982984 | noncoding |
| MSTRG. 9278. 2  | -0. 350958 | noncoding |

|                 |            |           |
|-----------------|------------|-----------|
| MSTRG. 9281. 1  | -1. 05698  | noncoding |
| MSTRG. 9283. 2  | 1. 18871   | coding    |
| MSTRG. 9284. 1  | -1. 01564  | noncoding |
| MSTRG. 9285. 2  | 0. 339366  | coding    |
| MSTRG. 9287. 2  | 1. 18409   | coding    |
| MSTRG. 9290. 1  | 1. 98081   | coding    |
| MSTRG. 9291. 1  | 1. 62276   | coding    |
| MSTRG. 9291. 3  | 0. 510821  | coding    |
| MSTRG. 9295. 1  | 1. 98263   | coding    |
| MSTRG. 9295. 2  | 2. 0171    | coding    |
| MSTRG. 9295. 4  | 2. 75427   | coding    |
| MSTRG. 9296. 1  | -0. 367107 | noncoding |
| MSTRG. 9303. 2  | -0. 626308 | noncoding |
| MSTRG. 9304. 1  | 1. 22015   | coding    |
| MSTRG. 9305. 2  | -0. 59722  | noncoding |
| MSTRG. 9305. 3  | -1. 39747  | noncoding |
| MSTRG. 9304. 3  | 1. 1322    | coding    |
| MSTRG. 9306. 1  | -0. 332984 | noncoding |
| MSTRG. 9306. 2  | -0. 193418 | noncoding |
| MSTRG. 9307. 2  | 1. 75213   | coding    |
| MSTRG. 9308. 4  | 1. 35179   | coding    |
| MSTRG. 9312. 11 | 2. 80254   | coding    |
| MSTRG. 9312. 12 | 2. 64761   | coding    |
| MSTRG. 9312. 13 | 2. 75278   | coding    |
| MSTRG. 9312. 14 | 2. 77164   | coding    |
| MSTRG. 9312. 3  | 2. 78765   | coding    |
| MSTRG. 9312. 4  | 2. 75429   | coding    |
| MSTRG. 9312. 9  | 2. 66177   | coding    |
| MSTRG. 9312. 15 | 2. 80532   | coding    |
| MSTRG. 9312. 23 | 1. 02908   | coding    |
| MSTRG. 9312. 24 | 0. 194668  | coding    |
| MSTRG. 9312. 25 | 0. 084911  | coding    |
| MSTRG. 9310. 2  | 1. 82475   | coding    |
| MSTRG. 9315. 1  | 0. 13384   | coding    |
| MSTRG. 9316. 1  | -2. 00097  | noncoding |
| MSTRG. 9315. 3  | 0. 734124  | coding    |
| MSTRG. 9321. 3  | 0. 188619  | coding    |
| MSTRG. 9321. 4  | 0. 449642  | coding    |
| MSTRG. 9322. 1  | 0. 166763  | coding    |
| MSTRG. 9325. 2  | 0. 443907  | coding    |
| MSTRG. 9327. 4  | 1. 35018   | coding    |
| MSTRG. 9335. 3  | -0. 12707  | noncoding |
| MSTRG. 9335. 4  | 0. 507138  | coding    |
| MSTRG. 9333. 2  | 1. 49799   | coding    |
| MSTRG. 9338. 1  | -0. 855988 | noncoding |
| MSTRG. 9361. 4  | 1. 6821    | coding    |
| MSTRG. 9361. 6  | 1. 87032   | coding    |
| MSTRG. 9361. 7  | 1. 88496   | coding    |
| MSTRG. 9361. 8  | 1. 60533   | coding    |
| MSTRG. 9361. 9  | 1. 779     | coding    |
| MSTRG. 9361. 10 | 1. 68446   | coding    |
| MSTRG. 9361. 11 | 1. 84297   | coding    |
| MSTRG. 9361. 13 | 1. 89148   | coding    |
| MSTRG. 9361. 14 | 1. 8172    | coding    |

|                 |            |           |
|-----------------|------------|-----------|
| MSTRG. 9365. 1  | -2. 35805  | noncoding |
| MSTRG. 9364. 12 | -0. 270245 | noncoding |
| MSTRG. 9364. 13 | 1. 98411   | coding    |
| MSTRG. 9367. 2  | 2. 31886   | coding    |
| MSTRG. 9367. 3  | 2. 93188   | coding    |
| MSTRG. 9367. 4  | 3. 10914   | coding    |
| MSTRG. 9367. 6  | 2. 46361   | coding    |
| MSTRG. 9367. 9  | 2. 92273   | coding    |
| MSTRG. 9367. 10 | 1. 88889   | coding    |
| MSTRG. 9368. 1  | 0. 960683  | coding    |
| MSTRG. 9367. 12 | 0. 555036  | coding    |
| MSTRG. 9343. 3  | -1. 00729  | noncoding |
| MSTRG. 9349. 1  | -0. 116048 | noncoding |
| MSTRG. 9353. 1  | -2. 11201  | noncoding |
| MSTRG. 9358. 4  | 1. 63945   | coding    |
| MSTRG. 9358. 1  | 1. 54183   | coding    |
| MSTRG. 9358. 3  | 1. 53137   | coding    |
| MSTRG. 9358. 5  | 1. 49642   | coding    |
| MSTRG. 9358. 6  | 1. 43481   | coding    |
| MSTRG. 9360. 3  | 0. 999076  | coding    |
| MSTRG. 9369. 3  | 1. 81216   | coding    |
| MSTRG. 9369. 4  | 1. 88839   | coding    |
| MSTRG. 9369. 5  | 1. 43041   | coding    |
| MSTRG. 9374. 1  | 3. 33253   | coding    |
| MSTRG. 9374. 2  | 3. 47074   | coding    |
| MSTRG. 9374. 3  | 3. 65438   | coding    |
| MSTRG. 9374. 5  | 3. 36063   | coding    |
| MSTRG. 9374. 4  | 3. 68783   | coding    |
| MSTRG. 9374. 7  | 3. 38179   | coding    |
| MSTRG. 9372. 2  | 1. 22343   | coding    |
| MSTRG. 9372. 3  | 1. 60779   | coding    |
| MSTRG. 9373. 3  | 1. 51811   | coding    |
| MSTRG. 9377. 2  | -0. 531529 | noncoding |
| MSTRG. 9386. 6  | -0. 119604 | noncoding |
| MSTRG. 9386. 4  | 2. 61462   | coding    |
| MSTRG. 9379. 1  | -0. 901999 | noncoding |
| MSTRG. 9382. 1  | -0. 57382  | noncoding |
| MSTRG. 9385. 2  | 1. 69442   | coding    |
| MSTRG. 9385. 3  | 1. 64496   | coding    |
| MSTRG. 9396. 1  | 2. 09428   | coding    |
| MSTRG. 9396. 2  | 1. 77006   | coding    |
| MSTRG. 9396. 3  | 1. 95849   | coding    |
| MSTRG. 9398. 4  | 0. 791484  | coding    |
| MSTRG. 9398. 3  | 0. 445856  | coding    |
| MSTRG. 9394. 1  | 1. 26144   | coding    |
| MSTRG. 9394. 2  | 1. 31365   | coding    |
| MSTRG. 9394. 3  | 1. 1944    | coding    |
| MSTRG. 9394. 4  | 1. 4993    | coding    |
| MSTRG. 9393. 1  | -0. 418291 | noncoding |
| MSTRG. 9405. 6  | 0. 803116  | coding    |
| MSTRG. 9407. 3  | 0. 456368  | coding    |
| MSTRG. 9410. 1  | 1. 51942   | coding    |
| MSTRG. 9420. 2  | 0. 49683   | coding    |
| MSTRG. 9422. 1  | 2. 10727   | coding    |

|                 |            |           |
|-----------------|------------|-----------|
| MSTRG. 9422. 4  | 2. 2363    | coding    |
| MSTRG. 9423. 2  | 1. 57035   | coding    |
| MSTRG. 9423. 3  | 0. 658408  | coding    |
| MSTRG. 9423. 4  | 0. 841356  | coding    |
| MSTRG. 9425. 2  | 0. 888897  | coding    |
| MSTRG. 9411. 2  | 0. 452813  | coding    |
| MSTRG. 9413. 2  | -1. 40294  | noncoding |
| MSTRG. 9428. 2  | 1. 57043   | coding    |
| MSTRG. 9436. 1  | 1. 47982   | coding    |
| MSTRG. 9436. 2  | 1. 46974   | coding    |
| MSTRG. 9436. 3  | 1. 56151   | coding    |
| MSTRG. 9436. 4  | 1. 47493   | coding    |
| MSTRG. 9436. 5  | 1. 54951   | coding    |
| MSTRG. 9436. 6  | 1. 60518   | coding    |
| MSTRG. 9436. 10 | 1. 4501    | coding    |
| MSTRG. 9436. 11 | 1. 40849   | coding    |
| MSTRG. 9436. 15 | 1. 3568    | coding    |
| MSTRG. 9436. 12 | 1. 5824    | coding    |
| MSTRG. 9436. 13 | 1. 56676   | coding    |
| MSTRG. 9436. 14 | 1. 68806   | coding    |
| MSTRG. 9436. 9  | 1. 58308   | coding    |
| MSTRG. 9436. 16 | 1. 50005   | coding    |
| MSTRG. 9436. 17 | 1. 53614   | coding    |
| MSTRG. 9436. 18 | 1. 53976   | coding    |
| MSTRG. 9436. 19 | 1. 54834   | coding    |
| MSTRG. 9431. 3  | 0. 876618  | coding    |
| MSTRG. 9431. 4  | 1. 89143   | coding    |
| MSTRG. 9445. 1  | 1. 00424   | coding    |
| MSTRG. 9446. 2  | -1. 23012  | noncoding |
| MSTRG. 9446. 3  | -1. 72494  | noncoding |
| MSTRG. 9446. 4  | -1. 67364  | noncoding |
| MSTRG. 9446. 6  | -1. 90555  | noncoding |
| MSTRG. 9449. 1  | 1. 36153   | coding    |
| MSTRG. 9449. 2  | -0. 29445  | noncoding |
| MSTRG. 9449. 4  | -1. 07867  | noncoding |
| MSTRG. 9449. 3  | 1. 1698    | coding    |
| MSTRG. 9449. 5  | -2. 1932   | noncoding |
| MSTRG. 9445. 3  | -0. 164051 | noncoding |
| MSTRG. 9445. 4  | -0. 416159 | noncoding |
| MSTRG. 9445. 6  | -1. 7714   | noncoding |
| MSTRG. 9453. 1  | -1. 88808  | noncoding |
| MSTRG. 9453. 2  | -1. 80224  | noncoding |
| MSTRG. 9453. 3  | -0. 850514 | noncoding |
| MSTRG. 9434. 2  | 0. 953146  | coding    |
| MSTRG. 9437. 2  | 0. 560594  | coding    |
| MSTRG. 9441. 1  | 2. 47258   | coding    |
| MSTRG. 9458. 2  | 3. 3437    | coding    |
| MSTRG. 9458. 4  | 2. 92362   | coding    |
| MSTRG. 9457. 1  | 0. 909975  | coding    |
| MSTRG. 9464. 2  | -0. 727774 | noncoding |
| MSTRG. 9464. 1  | -0. 590993 | noncoding |
| MSTRG. 9464. 3  | -0. 643688 | noncoding |
| MSTRG. 9464. 4  | -0. 609671 | noncoding |
| MSTRG. 9464. 5  | -0. 548756 | noncoding |

|                 |            |           |
|-----------------|------------|-----------|
| MSTRG. 9460. 1  | 2. 12772   | coding    |
| MSTRG. 9471. 5  | 2. 13904   | coding    |
| MSTRG. 9471. 6  | 3. 08689   | coding    |
| MSTRG. 9471. 7  | 3. 08492   | coding    |
| MSTRG. 9471. 8  | 2. 74577   | coding    |
| MSTRG. 9473. 1  | 2. 3016    | coding    |
| MSTRG. 9473. 2  | 1. 38344   | coding    |
| MSTRG. 9473. 3  | 1. 98898   | coding    |
| MSTRG. 9473. 4  | 1. 42083   | coding    |
| MSTRG. 9473. 5  | 1. 48112   | coding    |
| MSTRG. 9468. 2  | 1. 62622   | coding    |
| MSTRG. 9468. 3  | 1. 68212   | coding    |
| MSTRG. 9481. 4  | 1. 83647   | coding    |
| MSTRG. 9481. 11 | -0. 150157 | noncoding |
| MSTRG. 9481. 17 | 1. 51253   | coding    |
| MSTRG. 9481. 14 | 1. 78599   | coding    |
| MSTRG. 9481. 15 | 1. 73147   | coding    |
| MSTRG. 9481. 16 | 1. 81534   | coding    |
| MSTRG. 9481. 9  | 1. 80375   | coding    |
| MSTRG. 9481. 10 | 2. 00464   | coding    |
| MSTRG. 9481. 18 | 1. 93689   | coding    |
| MSTRG. 9481. 7  | 1. 99923   | coding    |
| MSTRG. 9477. 2  | -0. 528688 | noncoding |
| MSTRG. 9478. 4  | 1. 68683   | coding    |
| MSTRG. 9482. 7  | 2. 07478   | coding    |
| MSTRG. 9484. 1  | -1. 38432  | noncoding |
| MSTRG. 9486. 2  | 1. 8136    | coding    |
| MSTRG. 9493. 6  | 3. 56657   | coding    |
| MSTRG. 9493. 7  | 2. 68056   | coding    |
| MSTRG. 9493. 8  | 2. 01106   | coding    |
| MSTRG. 9496. 4  | 2. 943     | coding    |
| MSTRG. 9498. 2  | 1. 59107   | coding    |
| MSTRG. 9498. 8  | -0. 164732 | noncoding |
| MSTRG. 9499. 1  | 0. 861892  | coding    |
| MSTRG. 9499. 2  | 1. 061     | coding    |
| MSTRG. 9499. 4  | 0. 487367  | coding    |
| MSTRG. 9499. 5  | 0. 697245  | coding    |
| MSTRG. 9500. 1  | 2. 08605   | coding    |
| MSTRG. 9500. 3  | 2. 27616   | coding    |
| MSTRG. 9500. 4  | 2. 15996   | coding    |
| MSTRG. 9503. 1  | 1. 40933   | coding    |
| MSTRG. 9503. 2  | 1. 65434   | coding    |
| MSTRG. 9503. 3  | 1. 65104   | coding    |
| MSTRG. 9503. 4  | 1. 46304   | coding    |
| MSTRG. 9503. 6  | 1. 61345   | coding    |
| MSTRG. 9505. 2  | 1. 85619   | coding    |
| MSTRG. 9505. 3  | 1. 92895   | coding    |
| MSTRG. 9505. 4  | 2. 40709   | coding    |
| MSTRG. 9505. 5  | 2. 02816   | coding    |
| MSTRG. 9505. 6  | 1. 96033   | coding    |
| MSTRG. 9509. 1  | -0. 924922 | noncoding |
| MSTRG. 9509. 3  | -0. 866985 | noncoding |
| MSTRG. 9516. 4  | 1. 04969   | coding    |
| MSTRG. 9516. 6  | -0. 451002 | noncoding |



|                |            |           |
|----------------|------------|-----------|
| MSTRG. 9516. 8 | 0. 307712  | coding    |
| MSTRG. 9516. 7 | 1. 07016   | coding    |
| MSTRG. 9518. 2 | 2. 74867   | coding    |
| MSTRG. 9518. 3 | 2. 44767   | coding    |
| MSTRG. 9522. 1 | 2. 55994   | coding    |
| MSTRG. 9523. 2 | -1. 44333  | noncoding |
| MSTRG. 9526. 2 | 1. 80711   | coding    |
| MSTRG. 9532. 1 | -1. 78395  | noncoding |
| MSTRG. 9534. 1 | 0. 963802  | coding    |
| MSTRG. 9535. 1 | 0. 060261  | coding    |
| MSTRG. 9535. 2 | 0. 657324  | coding    |
| MSTRG. 9535. 3 | 0. 966776  | coding    |
| MSTRG. 9536. 1 | 1. 07542   | coding    |
| MSTRG. 9543. 1 | -0. 472425 | noncoding |
| MSTRG. 9543. 2 | -0. 873531 | noncoding |
| MSTRG. 9550. 1 | -0. 735247 | noncoding |
| MSTRG. 9547. 1 | 1. 36779   | coding    |
| MSTRG. 9554. 1 | 0. 989049  | coding    |
| MSTRG. 9555. 1 | -1. 99073  | noncoding |
| MSTRG. 9556. 1 | 0. 302169  | coding    |
| MSTRG. 9556. 2 | -0. 42017  | noncoding |
| MSTRG. 9556. 3 | 0. 571722  | coding    |
| MSTRG. 9563. 1 | 0. 281731  | coding    |
| MSTRG. 9563. 2 | 0. 260593  | coding    |
| MSTRG. 9564. 2 | 1. 36619   | coding    |
| MSTRG. 9565. 4 | 2. 33276   | coding    |
| MSTRG. 9565. 5 | 2. 26503   | coding    |
| MSTRG. 9566. 2 | 1. 13601   | coding    |
| MSTRG. 9566. 3 | 0. 732486  | coding    |
| MSTRG. 9574. 3 | 2. 2579    | coding    |
| MSTRG. 9574. 4 | 1. 52164   | coding    |
| MSTRG. 9574. 5 | 1. 69962   | coding    |
| MSTRG. 9574. 6 | 1. 57766   | coding    |
| MSTRG. 9574. 7 | 2. 29166   | coding    |
| MSTRG. 9576. 1 | 2. 77197   | coding    |
| MSTRG. 9576. 2 | 2. 85071   | coding    |
| MSTRG. 9576. 3 | 2. 80244   | coding    |
| MSTRG. 9567. 2 | -1. 11432  | noncoding |
| MSTRG. 9567. 3 | 0. 275066  | coding    |
| MSTRG. 9567. 4 | 0. 310314  | coding    |
| MSTRG. 9568. 2 | 0. 660142  | coding    |
| MSTRG. 9571. 1 | -0. 418747 | noncoding |
| MSTRG. 9577. 4 | 1. 29857   | coding    |
| MSTRG. 9586. 3 | 0. 586593  | coding    |
| MSTRG. 9587. 2 | 0. 513253  | coding    |
| MSTRG. 9589. 3 | 2. 70617   | coding    |
| MSTRG. 9589. 5 | 1. 26188   | coding    |
| MSTRG. 9590. 2 | 1. 727     | coding    |
| MSTRG. 9590. 3 | 1. 57932   | coding    |
| MSTRG. 9590. 5 | 1. 45198   | coding    |
| MSTRG. 9590. 7 | 1. 06526   | coding    |
| MSTRG. 9590. 6 | 0. 79324   | coding    |
| MSTRG. 9591. 1 | 1. 98046   | coding    |
| MSTRG. 9591. 3 | 1. 93049   | coding    |

|                 |            |           |
|-----------------|------------|-----------|
| MSTRG. 9598. 10 | 0. 604026  | coding    |
| MSTRG. 9598. 3  | 0. 913325  | coding    |
| MSTRG. 9598. 4  | 0. 353123  | coding    |
| MSTRG. 9598. 6  | 0. 192168  | coding    |
| MSTRG. 9598. 7  | 0. 694605  | coding    |
| MSTRG. 9598. 8  | 0. 10177   | coding    |
| MSTRG. 9598. 9  | 0. 516284  | coding    |
| MSTRG. 9599. 1  | 0. 204322  | coding    |
| MSTRG. 9599. 3  | 0. 042852  | coding    |
| MSTRG. 9599. 4  | 0. 086403  | coding    |
| MSTRG. 9600. 12 | 1. 44947   | coding    |
| MSTRG. 9600. 8  | 1. 79598   | coding    |
| MSTRG. 9600. 13 | 2. 23858   | coding    |
| MSTRG. 9600. 7  | 1. 58861   | coding    |
| MSTRG. 9600. 9  | 1. 59181   | coding    |
| MSTRG. 9600. 16 | 0. 585663  | coding    |
| MSTRG. 9602. 2  | 1. 11013   | coding    |
| MSTRG. 9594. 1  | 0. 802023  | coding    |
| MSTRG. 9594. 2  | 0. 02236   | coding    |
| MSTRG. 9594. 3  | 0. 927318  | coding    |
| MSTRG. 9594. 5  | 0. 855252  | coding    |
| MSTRG. 9597. 1  | 2. 40871   | coding    |
| MSTRG. 9597. 2  | 2. 39019   | coding    |
| MSTRG. 9597. 3  | 2. 39184   | coding    |
| MSTRG. 9597. 4  | 2. 08201   | coding    |
| MSTRG. 9604. 3  | 1. 30023   | coding    |
| MSTRG. 9604. 4  | 0. 055567  | coding    |
| MSTRG. 9605. 1  | -1. 84929  | noncoding |
| MSTRG. 9605. 2  | -1. 69946  | noncoding |
| MSTRG. 9606. 1  | 0. 478537  | coding    |
| MSTRG. 9610. 1  | -1. 39796  | noncoding |
| MSTRG. 9610. 2  | -2. 17063  | noncoding |
| MSTRG. 9612. 2  | 1. 26711   | coding    |
| MSTRG. 9612. 3  | 1. 42964   | coding    |
| MSTRG. 9613. 1  | -1. 41121  | noncoding |
| MSTRG. 9612. 4  | -1. 05477  | noncoding |
| MSTRG. 9603. 1  | -0. 516484 | noncoding |
| MSTRG. 9617. 3  | 0. 968441  | coding    |
| MSTRG. 9619. 2  | 2. 06603   | coding    |
| MSTRG. 9620. 1  | 0. 303062  | coding    |
| MSTRG. 9620. 2  | -0. 115228 | noncoding |
| MSTRG. 9624. 3  | 1. 26013   | coding    |
| MSTRG. 9625. 1  | -0. 303445 | noncoding |
| MSTRG. 9626. 1  | 0. 124187  | coding    |
| MSTRG. 9626. 2  | 0. 188015  | coding    |
| MSTRG. 9630. 2  | 3. 01032   | coding    |
| MSTRG. 9634. 3  | -0. 02173  | noncoding |
| MSTRG. 9634. 4  | -0. 439583 | noncoding |
| MSTRG. 9633. 3  | 0. 992573  | coding    |
| MSTRG. 9633. 2  | 0. 321087  | coding    |
| MSTRG. 9638. 1  | 2. 05456   | coding    |
| MSTRG. 9640. 4  | 1. 79671   | coding    |
| MSTRG. 9649. 4  | 1. 61064   | coding    |
| MSTRG. 9643. 1  | 0. 297496  | coding    |

|                 |            |           |
|-----------------|------------|-----------|
| MSTRG. 9651. 6  | 0. 081222  | coding    |
| MSTRG. 9650. 1  | -1. 5241   | noncoding |
| MSTRG. 9653. 1  | 2. 42133   | coding    |
| MSTRG. 9653. 2  | 1. 54462   | coding    |
| MSTRG. 9655. 3  | 1. 38622   | coding    |
| MSTRG. 9657. 1  | -0. 583736 | noncoding |
| MSTRG. 9658. 4  | 0. 741143  | coding    |
| MSTRG. 9661. 1  | -0. 919607 | noncoding |
| MSTRG. 9662. 4  | 0. 982122  | coding    |
| MSTRG. 9663. 3  | 1. 53513   | coding    |
| MSTRG. 9663. 4  | 1. 64308   | coding    |
| MSTRG. 9665. 1  | 0. 485329  | coding    |
| MSTRG. 9665. 2  | 0. 540247  | coding    |
| MSTRG. 9665. 3  | 0. 482366  | coding    |
| MSTRG. 9665. 5  | 0. 465035  | coding    |
| MSTRG. 9667. 2  | 1. 27912   | coding    |
| MSTRG. 9667. 3  | 0. 95451   | coding    |
| MSTRG. 9675. 2  | 0. 765239  | coding    |
| MSTRG. 9675. 3  | 0. 620407  | coding    |
| MSTRG. 9675. 4  | -0. 110302 | noncoding |
| MSTRG. 9670. 2  | 2. 07066   | coding    |
| MSTRG. 9671. 2  | -0. 32085  | noncoding |
| MSTRG. 9676. 2  | 2. 3903    | coding    |
| MSTRG. 9676. 3  | 1. 21124   | coding    |
| MSTRG. 9685. 1  | 0. 065772  | coding    |
| MSTRG. 9689. 1  | 2. 35184   | coding    |
| MSTRG. 9689. 3  | 2. 42213   | coding    |
| MSTRG. 9696. 2  | 1. 52987   | coding    |
| MSTRG. 9696. 5  | 1. 84038   | coding    |
| MSTRG. 9692. 1  | 1. 91652   | coding    |
| MSTRG. 9693. 2  | 0. 113863  | coding    |
| MSTRG. 9691. 2  | 1. 11217   | coding    |
| MSTRG. 9706. 1  | 2. 16066   | coding    |
| MSTRG. 9706. 5  | 1. 82238   | coding    |
| MSTRG. 9708. 1  | -1. 15022  | noncoding |
| MSTRG. 9719. 1  | -0. 413642 | noncoding |
| MSTRG. 9728. 1  | -1. 33242  | noncoding |
| MSTRG. 9740. 1  | -1. 87514  | noncoding |
| MSTRG. 9742. 1  | 2. 07019   | coding    |
| MSTRG. 9742. 2  | 1. 9551    | coding    |
| MSTRG. 9742. 3  | 1. 9132    | coding    |
| MSTRG. 9742. 4  | 2. 04011   | coding    |
| MSTRG. 9742. 8  | 2. 25854   | coding    |
| MSTRG. 9742. 9  | 2. 38248   | coding    |
| MSTRG. 9742. 13 | 1. 63872   | coding    |
| MSTRG. 9742. 15 | 0. 366256  | coding    |
| MSTRG. 9742. 17 | -1. 92331  | noncoding |
| MSTRG. 9742. 18 | 0. 20513   | coding    |
| MSTRG. 9743. 1  | -0. 173389 | noncoding |
| MSTRG. 9743. 2  | -0. 737074 | noncoding |
| MSTRG. 9745. 1  | 2. 66216   | coding    |
| MSTRG. 9745. 3  | 2. 61516   | coding    |
| MSTRG. 9745. 6  | 1. 19001   | coding    |
| MSTRG. 9732. 2  | 0. 618493  | coding    |

|                 |            |           |
|-----------------|------------|-----------|
| MSTRG. 9734. 2  | -0. 202316 | noncoding |
| MSTRG. 9734. 5  | -1. 42948  | noncoding |
| MSTRG. 9734. 4  | -0. 40229  | noncoding |
| MSTRG. 9735. 1  | -0. 24173  | noncoding |
| MSTRG. 9738. 1  | 1. 69563   | coding    |
| MSTRG. 9747. 1  | -3. 0908   | noncoding |
| MSTRG. 9753. 1  | -0. 384454 | noncoding |
| MSTRG. 9756. 1  | -2. 1721   | noncoding |
| MSTRG. 9760. 1  | -0. 671311 | noncoding |
| MSTRG. 9760. 2  | -0. 654603 | noncoding |
| MSTRG. 9760. 3  | -1. 54876  | noncoding |
| MSTRG. 9773. 1  | 2. 0276    | coding    |
| MSTRG. 9774. 1  | 1. 60364   | coding    |
| MSTRG. 9774. 2  | 1. 43702   | coding    |
| MSTRG. 9774. 4  | 1. 43777   | coding    |
| MSTRG. 9775. 1  | -0. 363213 | noncoding |
| MSTRG. 9780. 1  | -2. 87617  | noncoding |
| MSTRG. 9798. 1  | -1. 9271   | noncoding |
| MSTRG. 9815. 16 | -1. 39184  | noncoding |
| MSTRG. 9815. 18 | 0. 444255  | coding    |
| MSTRG. 9815. 19 | 0. 052847  | coding    |
| MSTRG. 9815. 20 | 0. 874229  | coding    |
| MSTRG. 9815. 21 | 0. 859773  | coding    |
| MSTRG. 9816. 1  | -1. 90282  | noncoding |
| MSTRG. 9815. 22 | 0. 186443  | coding    |
| MSTRG. 9815. 23 | -1. 26264  | noncoding |
| MSTRG. 9815. 24 | -2. 20316  | noncoding |
| MSTRG. 9815. 25 | 0. 503692  | coding    |
| MSTRG. 9815. 26 | -0. 107012 | noncoding |
| MSTRG. 9815. 27 | 0. 53349   | coding    |
| MSTRG. 9817. 1  | 0. 209733  | coding    |
| MSTRG. 9817. 2  | -1. 7131   | noncoding |
| MSTRG. 9811. 1  | -1. 85706  | noncoding |
| MSTRG. 9812. 2  | 2. 53886   | coding    |
| MSTRG. 9814. 2  | 3. 1005    | coding    |
| MSTRG. 9827. 1  | 0. 937545  | coding    |
| MSTRG. 9827. 3  | -0. 735495 | noncoding |
| MSTRG. 9849. 1  | 1. 32108   | coding    |
| MSTRG. 9854. 3  | 2. 79524   | coding    |
| MSTRG. 9858. 2  | 1. 28283   | coding    |
| MSTRG. 9859. 1  | 1. 38385   | coding    |
| MSTRG. 9859. 2  | 1. 46171   | coding    |
| MSTRG. 9862. 1  | -0. 506078 | noncoding |
| MSTRG. 9863. 1  | -0. 998856 | noncoding |
| MSTRG. 9878. 1  | 0. 049089  | coding    |
| MSTRG. 9884. 1  | -1. 20877  | noncoding |
| MSTRG. 9889. 1  | -0. 831654 | noncoding |
| MSTRG. 9889. 2  | -0. 494231 | noncoding |
| MSTRG. 9890. 3  | 0. 407155  | coding    |
| MSTRG. 9891. 1  | 1. 86693   | coding    |
| MSTRG. 9891. 2  | 1. 46716   | coding    |
| MSTRG. 9891. 3  | 1. 55065   | coding    |
| MSTRG. 9891. 4  | 1. 52818   | coding    |
| MSTRG. 9891. 6  | 1. 43016   | coding    |

|                 |            |           |
|-----------------|------------|-----------|
| MSTRG. 9891. 7  | 1. 51353   | coding    |
| MSTRG. 9891. 8  | 1. 55718   | coding    |
| MSTRG. 9891. 9  | 1. 62784   | coding    |
| MSTRG. 9891. 10 | 1. 57603   | coding    |
| MSTRG. 9891. 11 | 1. 56531   | coding    |
| MSTRG. 9893. 1  | -2. 38621  | noncoding |
| MSTRG. 9894. 1  | 1. 64114   | coding    |
| MSTRG. 9894. 2  | 1. 62943   | coding    |
| MSTRG. 9894. 3  | 1. 68539   | coding    |
| MSTRG. 9898. 1  | -1. 0393   | noncoding |
| MSTRG. 9898. 2  | -0. 95645  | noncoding |
| MSTRG. 9902. 6  | 0. 118838  | coding    |
| MSTRG. 9902. 5  | 0. 996076  | coding    |
| MSTRG. 9902. 9  | -0. 14858  | noncoding |
| MSTRG. 9902. 8  | 0. 629068  | coding    |
| MSTRG. 9902. 10 | 0. 321863  | coding    |
| MSTRG. 9902. 11 | 0. 611395  | coding    |
| MSTRG. 9899. 3  | -1. 12753  | noncoding |
| MSTRG. 9899. 4  | -1. 17901  | noncoding |
| MSTRG. 9899. 5  | -1. 00233  | noncoding |
| MSTRG. 9906. 2  | 1. 49402   | coding    |
| MSTRG. 9913. 2  | 1. 59142   | coding    |
| MSTRG. 9913. 6  | 2. 07066   | coding    |
| MSTRG. 9915. 2  | 1. 99776   | coding    |
| MSTRG. 9918. 1  | -1. 66929  | noncoding |
| MSTRG. 9919. 2  | 1. 66851   | coding    |
| MSTRG. 9919. 3  | 1. 5774    | coding    |
| MSTRG. 9919. 4  | 0. 920532  | coding    |
| MSTRG. 9924. 3  | 2. 13034   | coding    |
| MSTRG. 9929. 1  | 1. 96777   | coding    |
| MSTRG. 9929. 6  | 2. 99324   | coding    |
| MSTRG. 9929. 5  | 1. 86172   | coding    |
| MSTRG. 9934. 3  | 2. 23982   | coding    |
| MSTRG. 9941. 2  | 1. 54766   | coding    |
| MSTRG. 9944. 1  | 0. 535941  | coding    |
| MSTRG. 9944. 2  | 0. 026215  | coding    |
| MSTRG. 9944. 3  | 0. 636842  | coding    |
| MSTRG. 9948. 1  | 0. 556617  | coding    |
| MSTRG. 9961. 1  | -2. 25541  | noncoding |
| MSTRG. 9962. 3  | 1. 22862   | coding    |
| MSTRG. 9962. 4  | 1. 41899   | coding    |
| MSTRG. 9963. 2  | 1. 50296   | coding    |
| MSTRG. 9960. 1  | 0. 828887  | coding    |
| MSTRG. 9972. 3  | 1. 1762    | coding    |
| MSTRG. 9972. 4  | 1. 30701   | coding    |
| MSTRG. 9974. 1  | -1. 30909  | noncoding |
| MSTRG. 9977. 1  | -0. 765442 | noncoding |
| MSTRG. 9977. 2  | -1. 32795  | noncoding |
| MSTRG. 9984. 1  | 1. 41974   | coding    |
| MSTRG. 9984. 2  | 1. 4652    | coding    |
| MSTRG. 9985. 2  | 0. 840829  | coding    |
| MSTRG. 9986. 1  | 1. 79208   | coding    |
| MSTRG. 9986. 3  | 1. 74247   | coding    |
| MSTRG. 9987. 3  | 0. 162709  | coding    |

|                  |            |           |
|------------------|------------|-----------|
| MSTRG. 9987. 4   | 0. 458317  | coding    |
| MSTRG. 9990. 1   | -1. 09651  | noncoding |
| MSTRG. 9993. 2   | 1. 06654   | coding    |
| MSTRG. 9994. 1   | 0. 239736  | coding    |
| MSTRG. 9997. 1   | 1. 58525   | coding    |
| MSTRG. 9997. 2   | 1. 5253    | coding    |
| MSTRG. 9997. 3   | 3. 28576   | coding    |
| MSTRG. 9997. 4   | 1. 99527   | coding    |
| MSTRG. 9997. 5   | 1. 60797   | coding    |
| MSTRG. 10000. 1  | 0. 859878  | coding    |
| MSTRG. 10001. 1  | 3. 25541   | coding    |
| MSTRG. 10001. 4  | 2. 82554   | coding    |
| MSTRG. 10002. 1  | 0. 581695  | coding    |
| MSTRG. 10005. 2  | 1. 1012    | coding    |
| MSTRG. 10005. 1  | 1. 31508   | coding    |
| MSTRG. 10008. 4  | 1. 79501   | coding    |
| MSTRG. 10009. 2  | 1. 2741    | coding    |
| MSTRG. 10011. 1  | -0. 056219 | noncoding |
| MSTRG. 10012. 2  | 1. 11263   | coding    |
| MSTRG. 10012. 3  | 1. 32101   | coding    |
| MSTRG. 10012. 4  | 1. 10711   | coding    |
| MSTRG. 10013. 1  | -1. 77986  | noncoding |
| MSTRG. 10014. 1  | 0. 695682  | coding    |
| MSTRG. 10014. 3  | 0. 592222  | coding    |
| MSTRG. 10016. 1  | 1. 20229   | coding    |
| MSTRG. 10020. 4  | 0. 427224  | coding    |
| MSTRG. 10026. 10 | 0. 903657  | coding    |
| MSTRG. 10026. 13 | 1. 67401   | coding    |
| MSTRG. 10026. 11 | 1. 52622   | coding    |
| MSTRG. 10026. 12 | 1. 54046   | coding    |
| MSTRG. 10026. 18 | 1. 29764   | coding    |
| MSTRG. 10024. 2  | 1. 52897   | coding    |
| MSTRG. 10024. 3  | 1. 72043   | coding    |
| MSTRG. 10025. 1  | -1. 83949  | noncoding |
| MSTRG. 10031. 1  | -0. 595926 | noncoding |
| MSTRG. 10041. 2  | 2. 48903   | coding    |
| MSTRG. 10041. 3  | 2. 535     | coding    |
| MSTRG. 10041. 7  | 2. 46382   | coding    |
| MSTRG. 10042. 1  | -1. 31594  | noncoding |
| MSTRG. 10043. 2  | 2. 26534   | coding    |
| MSTRG. 10043. 5  | 1. 90771   | coding    |
| MSTRG. 10043. 6  | 1. 82566   | coding    |
| MSTRG. 10045. 2  | 0. 406363  | coding    |
| MSTRG. 10037. 3  | 1. 83329   | coding    |
| MSTRG. 10038. 1  | -0. 441637 | noncoding |
| MSTRG. 10038. 2  | -0. 749895 | noncoding |
| MSTRG. 10049. 1  | 0. 115314  | coding    |
| MSTRG. 10050. 2  | -1. 4462   | noncoding |
| MSTRG. 10052. 2  | 1. 20716   | coding    |
| MSTRG. 10053. 1  | 0. 212072  | coding    |
| MSTRG. 10051. 2  | -1. 42594  | noncoding |
| MSTRG. 10058. 1  | 0. 706373  | coding    |
| MSTRG. 10060. 1  | 1. 4613    | coding    |
| MSTRG. 10078. 4  | 1. 63013   | coding    |

|                |           |           |
|----------------|-----------|-----------|
| MSTRG.10078.5  | 1.72568   | coding    |
| MSTRG.10078.3  | 2.01104   | coding    |
| MSTRG.10079.1  | 0.28019   | coding    |
| MSTRG.10079.2  | -0.544159 | noncoding |
| MSTRG.10079.3  | -0.14916  | noncoding |
| MSTRG.10082.2  | 0.505433  | coding    |
| MSTRG.10087.3  | 1.50628   | coding    |
| MSTRG.10091.1  | 0.744898  | coding    |
| MSTRG.10091.2  | 0.905065  | coding    |
| MSTRG.10091.3  | 0.658457  | coding    |
| MSTRG.10092.1  | -1.67053  | noncoding |
| MSTRG.10094.8  | 1.48693   | coding    |
| MSTRG.10094.6  | 1.85957   | coding    |
| MSTRG.10094.7  | 1.609     | coding    |
| MSTRG.10094.9  | 1.40404   | coding    |
| MSTRG.10094.10 | 1.65371   | coding    |
| MSTRG.10094.11 | 1.48285   | coding    |
| MSTRG.10100.1  | -1.19253  | noncoding |
| MSTRG.10100.2  | -1.51981  | noncoding |
| MSTRG.10101.1  | -0.548834 | noncoding |
| MSTRG.10101.3  | 0.271318  | coding    |
| MSTRG.10104.2  | 1.50009   | coding    |
| MSTRG.10105.2  | -0.813822 | noncoding |
| MSTRG.10107.1  | 1.95251   | coding    |
| MSTRG.10102.2  | 1.94594   | coding    |
| MSTRG.10103.1  | -1.73631  | noncoding |
| MSTRG.10121.1  | 2.35203   | coding    |
| MSTRG.10121.3  | 1.43465   | coding    |
| MSTRG.10121.4  | 0.524305  | coding    |
| MSTRG.10122.1  | 1.40643   | coding    |
| MSTRG.10122.2  | 1.41364   | coding    |
| MSTRG.10122.3  | 1.315     | coding    |
| MSTRG.10122.4  | 1.15305   | coding    |
| MSTRG.10123.1  | -0.411344 | noncoding |
| MSTRG.10122.5  | 0.702502  | coding    |
| MSTRG.10122.6  | 1.02258   | coding    |
| MSTRG.10122.7  | 0.438916  | coding    |
| MSTRG.10122.8  | 0.830982  | coding    |
| MSTRG.10133.9  | 0.314902  | coding    |
| MSTRG.10133.3  | 2.32272   | coding    |
| MSTRG.10133.6  | 1.425     | coding    |
| MSTRG.10133.5  | 1.70708   | coding    |
| MSTRG.10133.11 | 2.57501   | coding    |
| MSTRG.10133.12 | 1.89684   | coding    |
| MSTRG.10112.2  | -1.99205  | noncoding |
| MSTRG.10112.3  | 1.40019   | coding    |
| MSTRG.10112.4  | 1.46527   | coding    |
| MSTRG.10112.5  | 1.23437   | coding    |
| MSTRG.10112.10 | 1.08433   | coding    |
| MSTRG.10112.11 | 1.25715   | coding    |
| MSTRG.10112.12 | 0.961431  | coding    |
| MSTRG.10115.4  | 1.01672   | coding    |
| MSTRG.10115.3  | 0.885317  | coding    |
| MSTRG.10115.5  | 0.167107  | coding    |

|                |           |           |
|----------------|-----------|-----------|
| MSTRG.10116.2  | 0.530616  | coding    |
| MSTRG.10134.1  | -0.66217  | noncoding |
| MSTRG.10138.3  | -2.10696  | noncoding |
| MSTRG.10138.2  | 2.02375   | coding    |
| MSTRG.10139.1  | -0.333764 | noncoding |
| MSTRG.10138.7  | 2.13926   | coding    |
| MSTRG.10142.1  | -1.75813  | noncoding |
| MSTRG.10146.6  | 1.97261   | coding    |
| MSTRG.10146.5  | 1.6035    | coding    |
| MSTRG.10147.1  | -0.939306 | noncoding |
| MSTRG.10148.1  | 2.24687   | coding    |
| MSTRG.10148.2  | 2.38772   | coding    |
| MSTRG.10148.3  | 2.19322   | coding    |
| MSTRG.10148.7  | 2.20345   | coding    |
| MSTRG.10148.9  | 2.64223   | coding    |
| MSTRG.10148.8  | 1.59161   | coding    |
| MSTRG.10148.6  | 1.38134   | coding    |
| MSTRG.10148.4  | 1.98579   | coding    |
| MSTRG.10143.2  | 0.477286  | coding    |
| MSTRG.10143.3  | 1.24315   | coding    |
| MSTRG.10155.1  | -1.75747  | noncoding |
| MSTRG.10159.1  | 1.54869   | coding    |
| MSTRG.10160.1  | 1.20837   | coding    |
| MSTRG.10162.1  | -1.63357  | noncoding |
| MSTRG.10172.2  | -0.035495 | noncoding |
| MSTRG.10172.5  | 3.61226   | coding    |
| MSTRG.10172.6  | -1.32819  | noncoding |
| MSTRG.10173.1  | 0.055267  | coding    |
| MSTRG.10173.2  | -0.165861 | noncoding |
| MSTRG.10172.8  | -0.312051 | noncoding |
| MSTRG.10172.9  | -0.392045 | noncoding |
| MSTRG.10172.10 | -0.418559 | noncoding |
| MSTRG.10172.11 | -0.857007 | noncoding |
| MSTRG.10175.1  | 0.034306  | coding    |
| MSTRG.10175.2  | -0.093081 | noncoding |
| MSTRG.10175.3  | 0.2789    | coding    |
| MSTRG.10175.4  | -0.744779 | noncoding |
| MSTRG.10175.5  | -0.330027 | noncoding |
| MSTRG.10178.6  | 1.52314   | coding    |
| MSTRG.10178.15 | 1.34002   | coding    |
| MSTRG.10178.7  | 1.38601   | coding    |
| MSTRG.10178.8  | 1.39272   | coding    |
| MSTRG.10178.12 | 1.56806   | coding    |
| MSTRG.10178.11 | 1.52949   | coding    |
| MSTRG.10178.9  | 1.45013   | coding    |
| MSTRG.10178.13 | 1.4381    | coding    |
| MSTRG.10178.1  | 1.42434   | coding    |
| MSTRG.10178.14 | 1.37655   | coding    |
| MSTRG.10178.16 | 1.20291   | coding    |
| MSTRG.10178.3  | 1.23021   | coding    |
| MSTRG.10178.10 | 1.19231   | coding    |
| MSTRG.10178.5  | 1.24675   | coding    |
| MSTRG.10178.17 | 1.04937   | coding    |
| MSTRG.10178.18 | 1.28197   | coding    |



|                  |            |           |
|------------------|------------|-----------|
| MSTRG. 10178. 19 | 1. 27788   | coding    |
| MSTRG. 10178. 20 | 1. 26143   | coding    |
| MSTRG. 10178. 21 | 1. 08023   | coding    |
| MSTRG. 10178. 22 | 1. 05556   | coding    |
| MSTRG. 10178. 24 | 1. 16266   | coding    |
| MSTRG. 10178. 23 | 1. 23013   | coding    |
| MSTRG. 10180. 2  | 1. 11285   | coding    |
| MSTRG. 10164. 2  | -0. 044989 | noncoding |
| MSTRG. 10164. 1  | 0. 589331  | coding    |
| MSTRG. 10164. 3  | 0. 58586   | coding    |
| MSTRG. 10183. 4  | 0. 928681  | coding    |
| MSTRG. 10184. 1  | 0. 282497  | coding    |
| MSTRG. 10185. 1  | -1. 22532  | noncoding |
| MSTRG. 10195. 1  | -1. 98695  | noncoding |
| MSTRG. 10198. 1  | 1. 8019    | coding    |
| MSTRG. 10197. 5  | -0. 625929 | noncoding |
| MSTRG. 10197. 6  | -0. 3529   | noncoding |
| MSTRG. 10208. 1  | -0. 425862 | noncoding |
| MSTRG. 10209. 1  | 1. 26156   | coding    |
| MSTRG. 10197. 7  | 0. 402901  | coding    |
| MSTRG. 10197. 8  | -0. 929614 | noncoding |
| MSTRG. 10197. 9  | -1. 56759  | noncoding |
| MSTRG. 10213. 1  | -0. 535455 | noncoding |
| MSTRG. 10214. 1  | -1. 43644  | noncoding |
| MSTRG. 10215. 1  | -0. 676555 | noncoding |
| MSTRG. 10230. 1  | 0. 515794  | coding    |
| MSTRG. 10231. 1  | 1. 27316   | coding    |
| MSTRG. 10231. 2  | 1. 62628   | coding    |
| MSTRG. 10232. 1  | -1. 82546  | noncoding |
| MSTRG. 10234. 1  | -0. 644136 | noncoding |
| MSTRG. 10234. 2  | -0. 821022 | noncoding |
| MSTRG. 10231. 4  | 1. 44833   | coding    |
| MSTRG. 10234. 3  | -1. 75562  | noncoding |
| MSTRG. 10235. 1  | -0. 597518 | noncoding |
| MSTRG. 10231. 9  | 1. 46841   | coding    |
| MSTRG. 10236. 1  | -0. 552943 | noncoding |
| MSTRG. 10231. 12 | 1. 22993   | coding    |
| MSTRG. 10231. 16 | 2. 2575    | coding    |
| MSTRG. 10231. 15 | 1. 95113   | coding    |
| MSTRG. 10231. 18 | 0. 996508  | coding    |
| MSTRG. 10231. 19 | 1. 7552    | coding    |
| MSTRG. 10237. 1  | -0. 151994 | noncoding |
| MSTRG. 10238. 1  | 0. 491114  | coding    |
| MSTRG. 10239. 3  | 1. 85895   | coding    |
| MSTRG. 10239. 4  | 2. 31051   | coding    |
| MSTRG. 10222. 1  | -0. 161552 | noncoding |
| MSTRG. 10219. 1  | -2. 85567  | noncoding |
| MSTRG. 10219. 2  | -2. 92667  | noncoding |
| MSTRG. 10219. 3  | -2. 28811  | noncoding |
| MSTRG. 10243. 7  | 0. 957968  | coding    |
| MSTRG. 10243. 8  | -0. 034208 | noncoding |
| MSTRG. 10255. 1  | -2. 24518  | noncoding |
| MSTRG. 10256. 3  | 1. 06986   | coding    |
| MSTRG. 10259. 1  | 0. 638754  | coding    |

|               |           |           |
|---------------|-----------|-----------|
| MSTRG.10260.1 | 0.451699  | coding    |
| MSTRG.10261.1 | -0.870923 | noncoding |
| MSTRG.10266.2 | 1.56366   | coding    |
| MSTRG.10268.1 | -2.29967  | noncoding |
| MSTRG.10270.1 | -2.10488  | noncoding |
| MSTRG.10273.2 | -0.036281 | noncoding |
| MSTRG.10273.4 | -0.896187 | noncoding |
| MSTRG.10273.3 | -0.75692  | noncoding |
| MSTRG.10273.5 | -0.707395 | noncoding |
| MSTRG.10275.1 | -0.235422 | noncoding |
| MSTRG.10278.2 | 2.58442   | coding    |
| MSTRG.10281.7 | 2.31079   | coding    |
| MSTRG.10281.9 | 2.25694   | coding    |
| MSTRG.10281.6 | 2.41646   | coding    |
| MSTRG.10281.4 | 2.49841   | coding    |
| MSTRG.10281.5 | 2.49186   | coding    |
| MSTRG.10281.8 | 2.49339   | coding    |
| MSTRG.10282.2 | 1.24622   | coding    |
| MSTRG.10282.3 | 0.582102  | coding    |
| MSTRG.10282.4 | 0.580715  | coding    |
| MSTRG.10284.1 | 2.01081   | coding    |
| MSTRG.10284.4 | 2.45856   | coding    |
| MSTRG.10290.1 | 0.423871  | coding    |
| MSTRG.10290.2 | 0.077575  | coding    |
| MSTRG.10302.4 | 1.1996    | coding    |
| MSTRG.10305.1 | -0.075349 | noncoding |
| MSTRG.10305.2 | -1.43724  | noncoding |
| MSTRG.10306.1 | -2.39191  | noncoding |
| MSTRG.10319.2 | 1.26073   | coding    |
| MSTRG.10322.2 | 1.04139   | coding    |
| MSTRG.10322.1 | 1.1633    | coding    |
| MSTRG.10317.1 | -1.65097  | noncoding |
| MSTRG.10326.3 | 1.04797   | coding    |
| MSTRG.10330.3 | -1.23924  | noncoding |
| MSTRG.10331.1 | 2.58528   | coding    |
| MSTRG.10331.2 | 2.22714   | coding    |
| MSTRG.10329.3 | 0.877441  | coding    |
| MSTRG.10343.1 | 1.10029   | coding    |
| MSTRG.10344.1 | 0.457718  | coding    |
| MSTRG.10343.4 | 0.836331  | coding    |
| MSTRG.10343.5 | 1.04612   | coding    |
| MSTRG.10335.1 | 2.25957   | coding    |
| MSTRG.10335.3 | 2.01528   | coding    |
| MSTRG.10336.2 | 2.28024   | coding    |
| MSTRG.10337.1 | -2.20625  | noncoding |
| MSTRG.10341.2 | 1.16179   | coding    |
| MSTRG.10341.3 | -0.22484  | noncoding |
| MSTRG.10342.1 | -0.839069 | noncoding |
| MSTRG.10350.1 | 0.894287  | coding    |
| MSTRG.10351.1 | 1.23604   | coding    |
| MSTRG.10351.2 | 1.23138   | coding    |
| MSTRG.10351.3 | 2.15146   | coding    |
| MSTRG.10356.3 | 0.786729  | coding    |
| MSTRG.10356.4 | 0.965342  | coding    |

|                |           |           |
|----------------|-----------|-----------|
| MSTRG.10362.2  | -0.844467 | noncoding |
| MSTRG.10366.2  | 1.34543   | coding    |
| MSTRG.10370.2  | 1.84475   | coding    |
| MSTRG.10370.3  | 0.196762  | coding    |
| MSTRG.10373.3  | 2.1518    | coding    |
| MSTRG.10373.2  | 2.28487   | coding    |
| MSTRG.10373.5  | 0.64985   | coding    |
| MSTRG.10374.1  | 0.941793  | coding    |
| MSTRG.10375.1  | -0.047262 | noncoding |
| MSTRG.10377.1  | -2.44899  | noncoding |
| MSTRG.10379.1  | -2.21259  | noncoding |
| MSTRG.10372.1  | 0.104062  | coding    |
| MSTRG.10372.2  | -0.318091 | noncoding |
| MSTRG.10437.2  | 1.09937   | coding    |
| MSTRG.10437.3  | 0.112103  | coding    |
| MSTRG.10437.4  | 0.181409  | coding    |
| MSTRG.10437.5  | -0.886392 | noncoding |
| MSTRG.10437.7  | -1.21519  | noncoding |
| MSTRG.10437.6  | -0.130633 | noncoding |
| MSTRG.10437.8  | 0.36396   | coding    |
| MSTRG.10437.9  | 0.314434  | coding    |
| MSTRG.10437.10 | -0.284254 | noncoding |
| MSTRG.10437.11 | -0.622858 | noncoding |
| MSTRG.10437.12 | 0.306751  | coding    |
| MSTRG.10437.13 | 0.439175  | coding    |
| MSTRG.10437.14 | 0.13674   | coding    |
| MSTRG.10437.15 | 0.061717  | coding    |
| MSTRG.10437.16 | 0.24796   | coding    |
| MSTRG.10437.17 | 0.776643  | coding    |
| MSTRG.10439.1  | -1.45383  | noncoding |
| MSTRG.10437.18 | 0.403021  | coding    |
| MSTRG.10440.1  | 0.106975  | coding    |
| MSTRG.10437.19 | 0.62565   | coding    |
| MSTRG.10437.20 | 0.306205  | coding    |
| MSTRG.10441.1  | -0.368442 | noncoding |
| MSTRG.10442.1  | 0.259222  | coding    |
| MSTRG.10443.1  | -0.526486 | noncoding |
| MSTRG.10445.1  | 0.14824   | coding    |
| MSTRG.10437.21 | -1.13938  | noncoding |
| MSTRG.10447.1  | -1.01038  | noncoding |
| MSTRG.10437.22 | -0.665213 | noncoding |
| MSTRG.10381.1  | -0.924252 | noncoding |
| MSTRG.10381.3  | -1.43624  | noncoding |
| MSTRG.10381.4  | -1.31907  | noncoding |
| MSTRG.10381.5  | -1.30949  | noncoding |
| MSTRG.10381.6  | -1.50503  | noncoding |
| MSTRG.10386.1  | -1.82715  | noncoding |
| MSTRG.10391.1  | 0.287161  | coding    |
| MSTRG.10383.1  | 0.640204  | coding    |
| MSTRG.10392.1  | 0.698819  | coding    |
| MSTRG.10399.2  | 1.10478   | coding    |
| MSTRG.10399.3  | -0.000461 | noncoding |
| MSTRG.10400.1  | 0.206565  | coding    |
| MSTRG.10401.3  | 1.56684   | coding    |

|                |           |           |
|----------------|-----------|-----------|
| MSTRG.10410.2  | -1.21538  | noncoding |
| MSTRG.10419.2  | 1.43346   | coding    |
| MSTRG.10419.3  | 1.16511   | coding    |
| MSTRG.10419.4  | 2.68036   | coding    |
| MSTRG.10420.1  | 0.299401  | coding    |
| MSTRG.10419.6  | 1.07191   | coding    |
| MSTRG.10407.1  | 0.799804  | coding    |
| MSTRG.10407.2  | 0.487371  | coding    |
| MSTRG.10407.3  | -1.75401  | noncoding |
| MSTRG.10409.1  | 1.68584   | coding    |
| MSTRG.10470.8  | 1.11359   | coding    |
| MSTRG.10470.10 | 1.62232   | coding    |
| MSTRG.10470.17 | 0.876957  | coding    |
| MSTRG.10470.18 | 0.226126  | coding    |
| MSTRG.10470.20 | -0.745782 | noncoding |
| MSTRG.10470.22 | 1.0326    | coding    |
| MSTRG.10470.23 | 0.325062  | coding    |
| MSTRG.10470.24 | -0.304691 | noncoding |
| MSTRG.10421.2  | 0.638925  | coding    |
| MSTRG.10424.2  | -1.28614  | noncoding |
| MSTRG.10424.3  | 1.90685   | coding    |
| MSTRG.10428.1  | -0.350511 | noncoding |
| MSTRG.10427.3  | 0.206555  | coding    |
| MSTRG.10430.2  | 1.14202   | coding    |
| MSTRG.10455.1  | 2.4943    | coding    |
| MSTRG.10455.2  | 2.70376   | coding    |
| MSTRG.10455.4  | 2.60692   | coding    |
| MSTRG.10456.1  | 1.10678   | coding    |
| MSTRG.10456.3  | 0.387705  | coding    |
| MSTRG.10456.5  | 0.329616  | coding    |
| MSTRG.10456.6  | 0.287402  | coding    |
| MSTRG.10456.7  | 1.44676   | coding    |
| MSTRG.10456.4  | 0.814588  | coding    |
| MSTRG.10464.1  | 1.79616   | coding    |
| MSTRG.10466.1  | -1.43721  | noncoding |
| MSTRG.10435.2  | 0.491305  | coding    |
| MSTRG.10488.3  | 0.360155  | coding    |
| MSTRG.10488.5  | 0.456134  | coding    |
| MSTRG.10488.2  | 0.638223  | coding    |
| MSTRG.10488.4  | 0.726895  | coding    |
| MSTRG.10489.1  | 0.343354  | coding    |
| MSTRG.10481.1  | -2.16828  | noncoding |
| MSTRG.10491.1  | -1.17315  | noncoding |
| MSTRG.10507.1  | 3.29545   | coding    |
| MSTRG.10508.1  | -2.16976  | noncoding |
| MSTRG.10507.3  | 2.4354    | coding    |
| MSTRG.10513.4  | -0.582692 | noncoding |
| MSTRG.10516.1  | 0.796018  | coding    |
| MSTRG.10511.1  | 1.20432   | coding    |
| MSTRG.10522.3  | -0.041187 | noncoding |
| MSTRG.10523.1  | -0.666478 | noncoding |
| MSTRG.10524.1  | -2.71469  | noncoding |
| MSTRG.10525.1  | -0.651438 | noncoding |
| MSTRG.10526.3  | 0.565741  | coding    |

|               |           |           |
|---------------|-----------|-----------|
| MSTRG.10526.5 | 0.858439  | coding    |
| MSTRG.10539.3 | 0.354665  | coding    |
| MSTRG.10539.4 | -0.614861 | noncoding |
| MSTRG.10542.1 | -1.49076  | noncoding |
| MSTRG.10542.2 | 0.26474   | coding    |
| MSTRG.10543.1 | -1.41904  | noncoding |
| MSTRG.10573.1 | -1.55767  | noncoding |
| MSTRG.10577.1 | -2.0739   | noncoding |
| MSTRG.10582.1 | -1.72248  | noncoding |
| MSTRG.10583.1 | -0.748757 | noncoding |
| MSTRG.10584.1 | -0.97682  | noncoding |
| MSTRG.10590.2 | 0.583716  | coding    |
| MSTRG.10590.3 | -0.726608 | noncoding |
| MSTRG.10595.3 | 2.01146   | coding    |
| MSTRG.10595.4 | 1.51437   | coding    |
| MSTRG.10595.5 | 1.90081   | coding    |
| MSTRG.10595.6 | 1.86336   | coding    |
| MSTRG.10595.7 | 2.18169   | coding    |
| MSTRG.10604.1 | -2.27449  | noncoding |
| MSTRG.10633.2 | 1.91081   | coding    |
| MSTRG.10634.1 | -0.312943 | noncoding |
| MSTRG.10635.1 | 0.555893  | coding    |
| MSTRG.10633.3 | -0.159438 | noncoding |
| MSTRG.10633.4 | 0.010187  | coding    |
| MSTRG.10633.5 | -0.305749 | noncoding |
| MSTRG.10636.1 | -0.866497 | noncoding |
| MSTRG.10640.1 | -0.918976 | noncoding |
| MSTRG.10641.1 | -0.356117 | noncoding |
| MSTRG.10639.2 | 2.20052   | coding    |
| MSTRG.10642.2 | 1.08655   | coding    |
| MSTRG.10643.1 | -0.327945 | noncoding |
| MSTRG.10642.3 | -0.006962 | noncoding |
| MSTRG.10623.2 | 1.41659   | coding    |
| MSTRG.10623.3 | 1.1727    | coding    |
| MSTRG.10626.2 | 0.736257  | coding    |
| MSTRG.10629.2 | -0.242172 | noncoding |
| MSTRG.10629.3 | -0.222516 | noncoding |
| MSTRG.10646.1 | -0.597859 | noncoding |
| MSTRG.10646.2 | -0.182895 | noncoding |
| MSTRG.10652.1 | 0.91172   | coding    |
| MSTRG.10653.1 | -1.91916  | noncoding |
| MSTRG.10652.5 | 0.574114  | coding    |
| MSTRG.10654.1 | 1.57429   | coding    |
| MSTRG.10659.1 | -0.802364 | noncoding |
| MSTRG.10659.2 | -1.35665  | noncoding |
| MSTRG.10665.1 | 2.01151   | coding    |
| MSTRG.10667.4 | 2.06656   | coding    |
| MSTRG.10667.5 | 2.87649   | coding    |
| MSTRG.10668.1 | 0.334037  | coding    |
| MSTRG.10668.2 | 0.599315  | coding    |
| MSTRG.10680.1 | -0.684311 | noncoding |
| MSTRG.10680.2 | -0.573272 | noncoding |
| MSTRG.10680.3 | 2.17114   | coding    |
| MSTRG.10680.4 | -0.131033 | noncoding |

|                |           |           |
|----------------|-----------|-----------|
| MSTRG.10685.1  | -2.65198  | noncoding |
| MSTRG.10688.1  | 0.009564  | coding    |
| MSTRG.10700.2  | 0.295425  | coding    |
| MSTRG.10700.3  | 1.73815   | coding    |
| MSTRG.10700.4  | 1.75905   | coding    |
| MSTRG.10701.1  | -0.136875 | noncoding |
| MSTRG.10700.5  | 0.075121  | coding    |
| MSTRG.10703.1  | 1.70444   | coding    |
| MSTRG.10703.13 | 2.16411   | coding    |
| MSTRG.10713.1  | 2.32783   | coding    |
| MSTRG.10713.5  | 3.11795   | coding    |
| MSTRG.10713.4  | 3.14159   | coding    |
| MSTRG.10713.6  | 2.13892   | coding    |
| MSTRG.10715.1  | -0.738852 | noncoding |
| MSTRG.10707.1  | -0.859368 | noncoding |
| MSTRG.10712.2  | -0.058879 | noncoding |
| MSTRG.10718.1  | 0.368835  | coding    |
| MSTRG.10725.1  | 0.327028  | coding    |
| MSTRG.10725.2  | -0.289229 | noncoding |
| MSTRG.10761.1  | -0.619853 | noncoding |
| MSTRG.10764.1  | -1.99397  | noncoding |
| MSTRG.10766.1  | 0.020062  | coding    |
| MSTRG.10766.2  | 0.003277  | coding    |
| MSTRG.10767.1  | -2.23819  | noncoding |
| MSTRG.10768.1  | -2.00064  | noncoding |
| MSTRG.10769.1  | -0.11919  | noncoding |
| MSTRG.10765.1  | 0.602233  | coding    |
| MSTRG.10765.2  | -1.08019  | noncoding |
| MSTRG.10772.1  | -0.389017 | noncoding |
| MSTRG.10775.1  | -2.03466  | noncoding |
| MSTRG.10776.1  | -1.44211  | noncoding |
| MSTRG.10776.2  | 0.589256  | coding    |
| MSTRG.10777.1  | -0.907244 | noncoding |
| MSTRG.10774.2  | -0.560505 | noncoding |
| MSTRG.10778.1  | 0.791893  | coding    |
| MSTRG.10774.3  | 0.379282  | coding    |
| MSTRG.10774.4  | 1.8736    | coding    |
| MSTRG.10774.5  | 0.622362  | coding    |
| MSTRG.10779.1  | 0.689824  | coding    |
| MSTRG.10774.6  | -0.301508 | noncoding |
| MSTRG.10780.1  | -0.213545 | noncoding |
| MSTRG.10782.1  | -1.12625  | noncoding |
| MSTRG.10786.2  | 0.305929  | coding    |
| MSTRG.10786.4  | -0.122763 | noncoding |
| MSTRG.10787.1  | 1.20376   | coding    |
| MSTRG.10789.1  | 1.46252   | coding    |
| MSTRG.10790.1  | -1.08     | noncoding |
| MSTRG.10791.1  | -0.620542 | noncoding |
| MSTRG.10792.1  | -0.733218 | noncoding |
| MSTRG.10793.3  | 1.14702   | coding    |
| MSTRG.10793.2  | 0.938058  | coding    |
| MSTRG.10794.1  | -2.24466  | noncoding |
| MSTRG.10794.2  | -1.78734  | noncoding |
| MSTRG.10795.4  | 2.26288   | coding    |

|               |           |           |
|---------------|-----------|-----------|
| MSTRG.10795.5 | 2.26435   | coding    |
| MSTRG.10796.1 | -2.22699  | noncoding |
| MSTRG.10806.4 | 1.23074   | coding    |
| MSTRG.10807.1 | -0.119315 | noncoding |
| MSTRG.10808.2 | 1.89911   | coding    |
| MSTRG.10808.5 | 1.79339   | coding    |
| MSTRG.10808.6 | 2.16379   | coding    |
| MSTRG.10808.7 | 1.456     | coding    |
| MSTRG.10809.1 | -0.388938 | noncoding |
| MSTRG.10811.1 | -1.56181  | noncoding |
| MSTRG.10812.1 | -2.00829  | noncoding |
| MSTRG.10820.1 | 1.09463   | coding    |
| MSTRG.10825.1 | 1.01321   | coding    |
| MSTRG.10830.1 | -0.161061 | noncoding |
| MSTRG.10831.1 | -0.493783 | noncoding |
| MSTRG.10829.4 | -0.102602 | noncoding |
| MSTRG.10829.5 | -0.357306 | noncoding |
| MSTRG.10837.1 | 0.903004  | coding    |
| MSTRG.10837.2 | 0.625274  | coding    |
| MSTRG.10837.4 | 0.193411  | coding    |
| MSTRG.10838.1 | -0.827792 | noncoding |
| MSTRG.10840.2 | 2.19429   | coding    |
| MSTRG.10840.3 | 0.834069  | coding    |
| MSTRG.10843.5 | 0.840022  | coding    |
| MSTRG.10844.2 | 1.71087   | coding    |
| MSTRG.10844.1 | 1.86847   | coding    |
| MSTRG.10845.1 | -0.962371 | noncoding |
| MSTRG.10847.1 | -1.48816  | noncoding |
| MSTRG.10848.2 | 0.368409  | coding    |
| MSTRG.10848.3 | 0.358898  | coding    |
| MSTRG.10848.4 | 1.18171   | coding    |
| MSTRG.10851.3 | 0.828657  | coding    |
| MSTRG.10852.1 | -0.684853 | noncoding |
| MSTRG.10853.1 | -2.06505  | noncoding |
| MSTRG.10857.1 | -2.62689  | noncoding |
| MSTRG.10867.3 | 2.56408   | coding    |
| MSTRG.10876.7 | 2.02693   | coding    |
| MSTRG.10876.8 | 1.97467   | coding    |
| MSTRG.10876.6 | 0.999289  | coding    |
| MSTRG.10880.3 | 0.552408  | coding    |
| MSTRG.10882.1 | -0.351619 | noncoding |
| MSTRG.10882.2 | 0.567572  | coding    |
| MSTRG.10882.4 | 0.178646  | coding    |
| MSTRG.10882.5 | 0.711843  | coding    |
| MSTRG.10882.6 | 0.059241  | coding    |
| MSTRG.10882.7 | 0.691079  | coding    |
| MSTRG.10882.8 | -0.723928 | noncoding |
| MSTRG.10888.2 | 0.532314  | coding    |
| MSTRG.10888.4 | 0.41849   | coding    |
| MSTRG.10889.1 | 0.881605  | coding    |
| MSTRG.10889.2 | -0.950651 | noncoding |
| MSTRG.10890.1 | -0.246254 | noncoding |
| MSTRG.10889.5 | 0.532295  | coding    |
| MSTRG.10889.7 | 0.349724  | coding    |

|               |           |           |
|---------------|-----------|-----------|
| MSTRG.10889.8 | 0.660816  | coding    |
| MSTRG.10889.9 | 1.48495   | coding    |
| MSTRG.10899.1 | 1.77309   | coding    |
| MSTRG.10901.1 | 0.105679  | coding    |
| MSTRG.10902.1 | 0.127588  | coding    |
| MSTRG.10903.1 | 1.30963   | coding    |
| MSTRG.10896.2 | -1.08817  | noncoding |
| MSTRG.10896.3 | -1.26717  | noncoding |
| MSTRG.10906.1 | -1.0748   | noncoding |
| MSTRG.10907.2 | 0.353088  | coding    |
| MSTRG.10907.3 | 0.376779  | coding    |
| MSTRG.10910.1 | -1.55683  | noncoding |
| MSTRG.10922.3 | 1.22107   | coding    |
| MSTRG.10922.5 | 1.16147   | coding    |
| MSTRG.10923.1 | -0.454847 | noncoding |
| MSTRG.10925.1 | 0.856575  | coding    |
| MSTRG.10925.9 | 1.02542   | coding    |
| MSTRG.10928.1 | -0.056727 | noncoding |
| MSTRG.10913.1 | -1.17105  | noncoding |
| MSTRG.10919.1 | 0.840439  | coding    |
| MSTRG.10921.1 | -1.54183  | noncoding |
| MSTRG.10935.1 | 0.967191  | coding    |
| MSTRG.10935.2 | 1.48246   | coding    |
| MSTRG.10936.2 | 1.24766   | coding    |
| MSTRG.10941.2 | 1.76004   | coding    |
| MSTRG.10942.2 | 0.026726  | coding    |
| MSTRG.10943.1 | -0.394997 | noncoding |
| MSTRG.10944.1 | 1.49996   | coding    |
| MSTRG.10950.3 | 2.33883   | coding    |
| MSTRG.10950.4 | 2.04388   | coding    |
| MSTRG.10956.1 | -0.831686 | noncoding |
| MSTRG.10958.1 | -2.03152  | noncoding |
| MSTRG.10961.1 | -0.835356 | noncoding |
| MSTRG.10971.1 | -0.755609 | noncoding |
| MSTRG.10976.1 | -1.10221  | noncoding |
| MSTRG.10976.2 | -1.2165   | noncoding |
| MSTRG.10976.3 | -2.09806  | noncoding |
| MSTRG.10984.1 | 0.403972  | coding    |
| MSTRG.10984.3 | -0.167425 | noncoding |
| MSTRG.10990.4 | -0.134254 | noncoding |
| MSTRG.10990.3 | 0.010711  | coding    |
| MSTRG.10990.5 | 0.448381  | coding    |
| MSTRG.11012.1 | 2.64581   | coding    |
| MSTRG.11012.2 | 2.63512   | coding    |
| MSTRG.11039.1 | 0.264664  | coding    |
| MSTRG.11040.1 | 0.335933  | coding    |
| MSTRG.11041.1 | 0.519258  | coding    |
| MSTRG.11042.1 | 0.525407  | coding    |
| MSTRG.11043.1 | 0.386245  | coding    |
| MSTRG.11044.1 | -1.42134  | noncoding |
| MSTRG.11045.1 | -1.3046   | noncoding |
| MSTRG.11046.1 | -1.85252  | noncoding |
| MSTRG.11036.2 | 1.52784   | coding    |
| MSTRG.11036.1 | 0.49015   | coding    |



|                 |            |           |
|-----------------|------------|-----------|
| MSTRG. 11037. 1 | -2. 21722  | noncoding |
| MSTRG. 11050. 1 | -1. 69229  | noncoding |
| MSTRG. 11050. 2 | -1. 82363  | noncoding |
| MSTRG. 11055. 1 | -0. 875228 | noncoding |
| MSTRG. 11057. 1 | -1. 95398  | noncoding |
| MSTRG. 11060. 1 | 1. 40389   | coding    |
| MSTRG. 11071. 2 | 2. 00087   | coding    |
| MSTRG. 11071. 3 | 2. 27771   | coding    |
| MSTRG. 11071. 4 | 2. 27527   | coding    |
| MSTRG. 11071. 5 | 1. 37504   | coding    |
| MSTRG. 11072. 1 | -0. 535767 | noncoding |
| MSTRG. 11073. 2 | -1. 36152  | noncoding |
| MSTRG. 11063. 1 | 1. 40358   | coding    |
| MSTRG. 11063. 3 | 1. 58476   | coding    |
| MSTRG. 11076. 2 | 0. 760293  | coding    |
| MSTRG. 11100. 1 | 0. 693234  | coding    |
| MSTRG. 11101. 1 | 0. 391094  | coding    |
| MSTRG. 11090. 1 | -0. 497297 | noncoding |
| MSTRG. 11091. 5 | 1. 82611   | coding    |
| MSTRG. 11091. 6 | 1. 82673   | coding    |
| MSTRG. 11096. 2 | 0. 589092  | coding    |
| MSTRG. 11098. 1 | 1. 43938   | coding    |
| MSTRG. 11098. 2 | 1. 74244   | coding    |
| MSTRG. 11103. 2 | 0. 884002  | coding    |
| MSTRG. 11103. 3 | 0. 991158  | coding    |
| MSTRG. 11109. 1 | -2. 23617  | noncoding |
| MSTRG. 11154. 2 | 2. 98588   | coding    |
| MSTRG. 11156. 1 | -1. 68154  | noncoding |
| MSTRG. 11158. 1 | 0. 91611   | coding    |
| MSTRG. 11161. 1 | -0. 975401 | noncoding |
| MSTRG. 11161. 4 | -1. 81663  | noncoding |
| MSTRG. 11170. 1 | 0. 388909  | coding    |
| MSTRG. 11171. 1 | -0. 732672 | noncoding |
| MSTRG. 11169. 3 | 0. 787146  | coding    |
| MSTRG. 11177. 1 | 0. 914533  | coding    |
| MSTRG. 11163. 2 | -0. 286594 | noncoding |
| MSTRG. 11185. 1 | 2. 17782   | coding    |
| MSTRG. 11186. 1 | -0. 828326 | noncoding |
| MSTRG. 11188. 3 | 2. 15459   | coding    |
| MSTRG. 11190. 3 | 2. 51476   | coding    |
| MSTRG. 11191. 1 | 0. 537937  | coding    |
| MSTRG. 11194. 2 | -0. 339263 | noncoding |
| MSTRG. 11199. 1 | -0. 534108 | noncoding |
| MSTRG. 11194. 4 | -1. 0561   | noncoding |
| MSTRG. 11230. 1 | -0. 791504 | noncoding |
| MSTRG. 11235. 1 | 1. 40926   | coding    |
| MSTRG. 11235. 2 | 2. 34639   | coding    |
| MSTRG. 11243. 1 | 0. 24273   | coding    |
| MSTRG. 11243. 3 | 1. 37816   | coding    |
| MSTRG. 11243. 6 | -2. 04549  | noncoding |
| MSTRG. 11243. 8 | 1. 46163   | coding    |
| MSTRG. 11219. 1 | 0. 026197  | coding    |
| MSTRG. 11226. 1 | 1. 41114   | coding    |
| MSTRG. 11226. 3 | 1. 21309   | coding    |

|                 |           |           |
|-----------------|-----------|-----------|
| MSTRG. 11221.1  | -2.51501  | noncoding |
| MSTRG. 11221.2  | -0.503708 | noncoding |
| MSTRG. 11248.3  | 3.5236    | coding    |
| MSTRG. 11248.9  | 3.69466   | coding    |
| MSTRG. 11248.8  | 3.53646   | coding    |
| MSTRG. 11248.6  | 3.45734   | coding    |
| MSTRG. 11248.7  | 3.56443   | coding    |
| MSTRG. 11249.1  | 0.415312  | coding    |
| MSTRG. 11257.1  | -2.69572  | noncoding |
| MSTRG. 11256.1  | -1.4242   | noncoding |
| MSTRG. 11279.1  | -1.33253  | noncoding |
| MSTRG. 11283.1  | 1.16954   | coding    |
| MSTRG. 11283.2  | 0.95414   | coding    |
| MSTRG. 11284.1  | -0.191808 | noncoding |
| MSTRG. 11292.1  | 1.84892   | coding    |
| MSTRG. 11293.1  | -0.880332 | noncoding |
| MSTRG. 11294.2  | 2.37554   | coding    |
| MSTRG. 11294.3  | 0.620473  | coding    |
| MSTRG. 11294.4  | 1.28777   | coding    |
| MSTRG. 11300.3  | 0.334912  | coding    |
| MSTRG. 11301.2  | 0.760578  | coding    |
| MSTRG. 11301.1  | 0.121935  | coding    |
| MSTRG. 11301.3  | -1.09047  | noncoding |
| MSTRG. 11301.4  | 0.512564  | coding    |
| MSTRG. 11301.5  | -1.19296  | noncoding |
| MSTRG. 11302.1  | -1.73137  | noncoding |
| MSTRG. 11302.2  | -0.098254 | noncoding |
| MSTRG. 11303.1  | -1.71565  | noncoding |
| MSTRG. 11304.2  | 1.20894   | coding    |
| MSTRG. 11304.3  | 0.2239    | coding    |
| MSTRG. 11373.3  | 2.10736   | coding    |
| MSTRG. 11373.4  | 0.216165  | coding    |
| MSTRG. 11373.8  | -0.02072  | noncoding |
| MSTRG. 11377.1  | 0.315251  | coding    |
| MSTRG. 11377.2  | 1.45746   | coding    |
| MSTRG. 11378.1  | -0.343366 | noncoding |
| MSTRG. 11377.3  | 2.40207   | coding    |
| MSTRG. 11377.4  | 1.74833   | coding    |
| MSTRG. 11377.5  | 2.40075   | coding    |
| MSTRG. 11377.7  | 2.40351   | coding    |
| MSTRG. 11377.6  | 2.33124   | coding    |
| MSTRG. 11377.8  | 0.60759   | coding    |
| MSTRG. 11377.9  | -0.293063 | noncoding |
| MSTRG. 11377.10 | -1.08761  | noncoding |
| MSTRG. 11379.1  | -0.829725 | noncoding |
| MSTRG. 11377.11 | -0.801041 | noncoding |
| MSTRG. 11381.1  | 0.528443  | coding    |
| MSTRG. 11382.1  | 0.155895  | coding    |
| MSTRG. 11377.18 | 0.445957  | coding    |
| MSTRG. 11377.19 | 0.412783  | coding    |
| MSTRG. 11377.20 | 0.408698  | coding    |
| MSTRG. 11377.21 | 1.10889   | coding    |
| MSTRG. 11377.22 | -0.685545 | noncoding |
| MSTRG. 11377.23 | -0.051182 | noncoding |

|                 |           |           |
|-----------------|-----------|-----------|
| MSTRG. 11377.24 | 0.766175  | coding    |
| MSTRG. 11377.25 | 0.680679  | coding    |
| MSTRG. 11377.26 | -0.923703 | noncoding |
| MSTRG. 11377.27 | -0.28672  | noncoding |
| MSTRG. 11309.1  | 0.950243  | coding    |
| MSTRG. 11307.2  | -1.17029  | noncoding |
| MSTRG. 11313.1  | -0.394056 | noncoding |
| MSTRG. 11313.2  | 0.720641  | coding    |
| MSTRG. 11313.3  | 2.19987   | coding    |
| MSTRG. 11313.4  | 2.16905   | coding    |
| MSTRG. 11319.1  | -0.244397 | noncoding |
| MSTRG. 11319.2  | -2.07322  | noncoding |
| MSTRG. 11321.1  | 1.03751   | coding    |
| MSTRG. 11326.1  | -0.071554 | noncoding |
| MSTRG. 11328.2  | 2.48693   | coding    |
| MSTRG. 11328.4  | 0.749418  | coding    |
| MSTRG. 11331.1  | -0.07937  | noncoding |
| MSTRG. 11335.1  | -1.7728   | noncoding |
| MSTRG. 11336.2  | 2.83388   | coding    |
| MSTRG. 11336.3  | 1.66091   | coding    |
| MSTRG. 11338.2  | 0.855891  | coding    |
| MSTRG. 11338.3  | 1.93029   | coding    |
| MSTRG. 11350.1  | 2.14039   | coding    |
| MSTRG. 11350.5  | 2.44974   | coding    |
| MSTRG. 11350.6  | 2.46422   | coding    |
| MSTRG. 11350.4  | 2.76372   | coding    |
| MSTRG. 11350.7  | 2.48386   | coding    |
| MSTRG. 11351.1  | -0.017117 | noncoding |
| MSTRG. 11352.1  | -0.987445 | noncoding |
| MSTRG. 11350.8  | 1.77273   | coding    |
| MSTRG. 11357.1  | -0.505311 | noncoding |
| MSTRG. 11358.1  | 0.453432  | coding    |
| MSTRG. 11359.1  | -0.635126 | noncoding |
| MSTRG. 11360.1  | 0.259475  | coding    |
| MSTRG. 11360.2  | -0.84422  | noncoding |
| MSTRG. 11344.2  | 0.153229  | coding    |
| MSTRG. 11345.1  | -0.633973 | noncoding |
| MSTRG. 11345.2  | -0.406746 | noncoding |
| MSTRG. 11346.1  | -1.99343  | noncoding |
| MSTRG. 11347.1  | 0.29508   | coding    |
| MSTRG. 11348.3  | -0.272941 | noncoding |
| MSTRG. 11363.1  | -0.370964 | noncoding |
| MSTRG. 11365.1  | -0.673506 | noncoding |
| MSTRG. 11366.1  | -0.213579 | noncoding |
| MSTRG. 11367.1  | 0.733041  | coding    |
| MSTRG. 11367.2  | 0.628607  | coding    |
| MSTRG. 11400.1  | 1.98618   | coding    |
| MSTRG. 11400.2  | 0.833123  | coding    |
| MSTRG. 11400.3  | 1.06586   | coding    |
| MSTRG. 11400.4  | 0.779561  | coding    |
| MSTRG. 11400.5  | 1.16972   | coding    |
| MSTRG. 11403.1  | 1.08765   | coding    |
| MSTRG. 11404.1  | 0.382462  | coding    |
| MSTRG. 11404.2  | 0.590051  | coding    |

|                 |           |           |
|-----------------|-----------|-----------|
| MSTRG. 11408.1  | 0.805573  | coding    |
| MSTRG. 11410.1  | -0.078776 | noncoding |
| MSTRG. 11411.1  | -0.537628 | noncoding |
| MSTRG. 11411.2  | -1.76954  | noncoding |
| MSTRG. 11413.3  | 0.526605  | coding    |
| MSTRG. 11413.4  | 0.127871  | coding    |
| MSTRG. 11406.3  | 1.86364   | coding    |
| MSTRG. 11414.1  | -0.181574 | noncoding |
| MSTRG. 11417.1  | -1.09016  | noncoding |
| MSTRG. 11417.2  | -0.189438 | noncoding |
| MSTRG. 11417.3  | -0.345475 | noncoding |
| MSTRG. 11417.4  | -0.50563  | noncoding |
| MSTRG. 11418.4  | 2.26129   | coding    |
| MSTRG. 11427.1  | 1.19124   | coding    |
| MSTRG. 11427.3  | 1.32641   | coding    |
| MSTRG. 11427.4  | 1.16619   | coding    |
| MSTRG. 11429.1  | 2.29913   | coding    |
| MSTRG. 11430.1  | 0.048686  | coding    |
| MSTRG. 11431.2  | 2.00436   | coding    |
| MSTRG. 11431.3  | 2.16449   | coding    |
| MSTRG. 11432.1  | 1.55608   | coding    |
| MSTRG. 11433.1  | -2.00245  | noncoding |
| MSTRG. 11436.1  | 0.807921  | coding    |
| MSTRG. 11436.2  | 0.715609  | coding    |
| MSTRG. 11437.3  | 0.268554  | coding    |
| MSTRG. 11438.1  | 1.10236   | coding    |
| MSTRG. 11439.3  | 2.47229   | coding    |
| MSTRG. 11441.4  | 2.43372   | coding    |
| MSTRG. 11441.2  | 2.46806   | coding    |
| MSTRG. 11441.3  | 2.33245   | coding    |
| MSTRG. 11442.1  | -1.02359  | noncoding |
| MSTRG. 11443.4  | 0.146537  | coding    |
| MSTRG. 11443.5  | 0.334919  | coding    |
| MSTRG. 11443.7  | 0.029196  | coding    |
| MSTRG. 11443.8  | 0.093232  | coding    |
| MSTRG. 11443.6  | 0.383439  | coding    |
| MSTRG. 11421.3  | -0.509216 | noncoding |
| MSTRG. 11423.1  | -0.475898 | noncoding |
| MSTRG. 11424.2  | 1.39159   | coding    |
| MSTRG. 11449.2  | 1.0742    | coding    |
| MSTRG. 11457.1  | 1.6078    | coding    |
| MSTRG. 11457.2  | 0.777134  | coding    |
| MSTRG. 11457.3  | 1.2529    | coding    |
| MSTRG. 11460.1  | -1.0565   | noncoding |
| MSTRG. 11462.12 | 1.30884   | coding    |
| MSTRG. 11462.7  | 1.48693   | coding    |
| MSTRG. 11462.8  | 1.89533   | coding    |
| MSTRG. 11462.9  | 1.7209    | coding    |
| MSTRG. 11462.13 | 1.71371   | coding    |
| MSTRG. 11462.14 | 0.445803  | coding    |
| MSTRG. 11462.15 | 1.79508   | coding    |
| MSTRG. 11463.1  | -0.985983 | noncoding |
| MSTRG. 11464.1  | 0.418925  | coding    |
| MSTRG. 11465.1  | -2.62352  | noncoding |

|                  |            |           |
|------------------|------------|-----------|
| MSTRG. 11466. 1  | 1. 39616   | coding    |
| MSTRG. 11466. 2  | 0. 662017  | coding    |
| MSTRG. 11472. 1  | 1. 83916   | coding    |
| MSTRG. 11472. 4  | -0. 675106 | noncoding |
| MSTRG. 11472. 2  | 1. 85407   | coding    |
| MSTRG. 11472. 5  | 0. 854006  | coding    |
| MSTRG. 11472. 6  | -0. 336169 | noncoding |
| MSTRG. 11472. 7  | 0. 051981  | coding    |
| MSTRG. 11472. 8  | -0. 607384 | noncoding |
| MSTRG. 11473. 1  | -0. 137954 | noncoding |
| MSTRG. 11473. 2  | -0. 332405 | noncoding |
| MSTRG. 11473. 3  | -0. 956285 | noncoding |
| MSTRG. 11474. 1  | -0. 785677 | noncoding |
| MSTRG. 11473. 4  | -0. 443042 | noncoding |
| MSTRG. 11472. 9  | -0. 205831 | noncoding |
| MSTRG. 11472. 10 | 1. 10687   | coding    |
| MSTRG. 11475. 1  | -0. 457904 | noncoding |
| MSTRG. 11469. 1  | 0. 868085  | coding    |
| MSTRG. 11470. 5  | 1. 59868   | coding    |
| MSTRG. 11476. 3  | 0. 65838   | coding    |
| MSTRG. 11476. 2  | 1. 23313   | coding    |
| MSTRG. 11476. 4  | 0. 531557  | coding    |
| MSTRG. 11476. 5  | 0. 639125  | coding    |
| MSTRG. 11477. 1  | 1. 78761   | coding    |
| MSTRG. 11478. 1  | -0. 217049 | noncoding |
| MSTRG. 11483. 2  | 0. 571016  | coding    |
| MSTRG. 11489. 1  | -1. 80702  | noncoding |
| MSTRG. 11490. 5  | 2. 3942    | coding    |
| MSTRG. 11490. 6  | 2. 42956   | coding    |
| MSTRG. 11496. 2  | 1. 9589    | coding    |
| MSTRG. 11499. 2  | 1. 38818   | coding    |
| MSTRG. 11499. 4  | 0. 531074  | coding    |
| MSTRG. 11492. 7  | 0. 715048  | coding    |
| MSTRG. 11492. 6  | 0. 217784  | coding    |
| MSTRG. 11492. 9  | 0. 339308  | coding    |
| MSTRG. 11492. 11 | 0. 101264  | coding    |
| MSTRG. 11492. 12 | 0. 633155  | coding    |
| MSTRG. 11492. 5  | 0. 52257   | coding    |
| MSTRG. 11492. 8  | 0. 357421  | coding    |
| MSTRG. 11492. 10 | 0. 652459  | coding    |
| MSTRG. 11492. 4  | 0. 229581  | coding    |
| MSTRG. 11505. 1  | 2. 40971   | coding    |
| MSTRG. 11505. 2  | 2. 19897   | coding    |
| MSTRG. 11507. 1  | -0. 756886 | noncoding |
| MSTRG. 11507. 6  | 0. 267645  | coding    |
| MSTRG. 11507. 8  | 0. 054156  | coding    |
| MSTRG. 11507. 3  | 0. 790835  | coding    |
| MSTRG. 11507. 7  | 0. 303093  | coding    |
| MSTRG. 11507. 2  | 0. 360018  | coding    |
| MSTRG. 11507. 4  | 0. 566863  | coding    |
| MSTRG. 11507. 9  | 0. 420523  | coding    |
| MSTRG. 11508. 1  | 1. 18848   | coding    |
| MSTRG. 11508. 4  | 1. 30213   | coding    |
| MSTRG. 11508. 5  | 2. 66859   | coding    |

|                 |           |           |
|-----------------|-----------|-----------|
| MSTRG. 11510.1  | -0.120671 | noncoding |
| MSTRG. 11513.1  | 1.46549   | coding    |
| MSTRG. 11514.1  | -2.21787  | noncoding |
| MSTRG. 11514.2  | -1.33001  | noncoding |
| MSTRG. 11515.1  | 0.171214  | coding    |
| MSTRG. 11520.1  | 1.89485   | coding    |
| MSTRG. 11534.1  | 0.270844  | coding    |
| MSTRG. 11537.1  | -0.696219 | noncoding |
| MSTRG. 11539.3  | -0.113541 | noncoding |
| MSTRG. 11540.4  | 0.088212  | coding    |
| MSTRG. 11530.2  | 0.758317  | coding    |
| MSTRG. 11551.1  | 0.20776   | coding    |
| MSTRG. 11551.2  | 0.869725  | coding    |
| MSTRG. 11553.1  | 0.724594  | coding    |
| MSTRG. 11549.5  | -1.98015  | noncoding |
| MSTRG. 11549.4  | -0.813721 | noncoding |
| MSTRG. 11542.1  | 0.113097  | coding    |
| MSTRG. 11545.1  | -2.05069  | noncoding |
| MSTRG. 11556.2  | -0.595926 | noncoding |
| MSTRG. 11560.1  | -0.729206 | noncoding |
| MSTRG. 11568.1  | 1.75982   | coding    |
| MSTRG. 11570.1  | -0.190495 | noncoding |
| MSTRG. 11571.1  | -1.18752  | noncoding |
| MSTRG. 11584.1  | 0.34364   | coding    |
| MSTRG. 11586.1  | 1.3122    | coding    |
| MSTRG. 11589.2  | 2.82609   | coding    |
| MSTRG. 11590.3  | 1.14993   | coding    |
| MSTRG. 11591.2  | 0.343424  | coding    |
| MSTRG. 11594.3  | 0.946956  | coding    |
| MSTRG. 11595.1  | -1.65601  | noncoding |
| MSTRG. 11595.2  | -2.07817  | noncoding |
| MSTRG. 11594.4  | 1.514     | coding    |
| MSTRG. 11606.4  | 2.39139   | coding    |
| MSTRG. 11606.10 | 2.16442   | coding    |
| MSTRG. 11599.1  | 2.39844   | coding    |
| MSTRG. 11599.2  | 2.02784   | coding    |
| MSTRG. 11610.1  | 1.88321   | coding    |
| MSTRG. 11610.2  | 1.91378   | coding    |
| MSTRG. 11611.2  | 1.35248   | coding    |
| MSTRG. 11611.4  | 1.4728    | coding    |
| MSTRG. 11613.1  | -1.5322   | noncoding |
| MSTRG. 11615.1  | 1.94645   | coding    |
| MSTRG. 11616.1  | -2.14057  | noncoding |
| MSTRG. 11618.2  | 1.48639   | coding    |
| MSTRG. 11617.1  | -2.42372  | noncoding |
| MSTRG. 11622.1  | -0.314499 | noncoding |
| MSTRG. 11622.2  | -0.236354 | noncoding |
| MSTRG. 11636.2  | 0.728929  | coding    |
| MSTRG. 11643.2  | 0.712486  | coding    |
| MSTRG. 11643.3  | 1.16492   | coding    |
| MSTRG. 11643.4  | 1.12923   | coding    |
| MSTRG. 11645.1  | -1.55575  | noncoding |
| MSTRG. 11646.1  | -0.453517 | noncoding |
| MSTRG. 11649.4  | 1.32162   | coding    |

|               |           |           |
|---------------|-----------|-----------|
| MSTRG.11656.3 | 1.91139   | coding    |
| MSTRG.11657.2 | 0.772059  | coding    |
| MSTRG.11662.1 | -1.68034  | noncoding |
| MSTRG.11663.4 | 1.30465   | coding    |
| MSTRG.11663.3 | 1.50317   | coding    |
| MSTRG.11664.2 | -1.2392   | noncoding |
| MSTRG.11666.1 | -0.111632 | noncoding |
| MSTRG.11666.5 | -0.392419 | noncoding |
| MSTRG.11666.3 | -1.37332  | noncoding |
| MSTRG.11666.4 | -1.49406  | noncoding |
| MSTRG.11659.1 | -0.377006 | noncoding |
| MSTRG.11659.2 | 0.027048  | coding    |
| MSTRG.11659.3 | -0.656237 | noncoding |
| MSTRG.11659.4 | -0.6966   | noncoding |
| MSTRG.11674.2 | 0.492767  | coding    |
| MSTRG.11675.1 | -0.121939 | noncoding |
| MSTRG.11675.3 | -0.172823 | noncoding |
| MSTRG.11676.3 | 0.773172  | coding    |
| MSTRG.11678.1 | 1.10117   | coding    |
| MSTRG.11678.5 | 1.72263   | coding    |
| MSTRG.11678.3 | 1.73296   | coding    |
| MSTRG.11679.1 | 1.12658   | coding    |
| MSTRG.11680.1 | 1.2602    | coding    |
| MSTRG.11680.3 | 1.67439   | coding    |
| MSTRG.11677.3 | 1.17767   | coding    |
| MSTRG.11683.1 | 1.77305   | coding    |
| MSTRG.11684.1 | 0.945062  | coding    |
| MSTRG.11684.4 | 0.788071  | coding    |
| MSTRG.11687.2 | -0.006613 | noncoding |
| MSTRG.11696.1 | -1.97171  | noncoding |
| MSTRG.11697.1 | 0.73486   | coding    |
| MSTRG.11697.2 | 1.25593   | coding    |
| MSTRG.11702.1 | 0.274851  | coding    |
| MSTRG.11702.3 | 0.141253  | coding    |
| MSTRG.11703.1 | -2.84902  | noncoding |
| MSTRG.11707.1 | -0.03954  | noncoding |
| MSTRG.11708.1 | -1.03095  | noncoding |
| MSTRG.11708.2 | -0.145162 | noncoding |
| MSTRG.11717.1 | 0.013901  | coding    |
| MSTRG.11724.2 | 2.07195   | coding    |
| MSTRG.11724.7 | 1.54362   | coding    |
| MSTRG.11724.6 | 1.0673    | coding    |
| MSTRG.11727.1 | 0.070118  | coding    |
| MSTRG.11728.1 | 1.16789   | coding    |
| MSTRG.11731.1 | -2.26721  | noncoding |
| MSTRG.11738.1 | 3.21468   | coding    |
| MSTRG.11738.3 | 3.22291   | coding    |
| MSTRG.11738.4 | -0.024814 | noncoding |
| MSTRG.11738.6 | 0.263068  | coding    |
| MSTRG.11738.7 | 1.55337   | coding    |
| MSTRG.11738.8 | 1.99622   | coding    |
| MSTRG.11738.9 | 2.39223   | coding    |
| MSTRG.11734.3 | 1.64994   | coding    |
| MSTRG.11737.2 | -0.837629 | noncoding |

|                 |           |           |
|-----------------|-----------|-----------|
| MSTRG. 11739.1  | 0.357074  | coding    |
| MSTRG. 11745.7  | 2.32487   | coding    |
| MSTRG. 11745.8  | -2.67018  | noncoding |
| MSTRG. 11746.1  | 0.972983  | coding    |
| MSTRG. 11747.1  | -0.26036  | noncoding |
| MSTRG. 11763.3  | 0.403403  | coding    |
| MSTRG. 11763.4  | 0.62111   | coding    |
| MSTRG. 11764.1  | -1.71015  | noncoding |
| MSTRG. 11763.5  | 0.575412  | coding    |
| MSTRG. 11765.1  | -0.15168  | noncoding |
| MSTRG. 11763.7  | 0.97362   | coding    |
| MSTRG. 11756.2  | 2.91797   | coding    |
| MSTRG. 11756.6  | 2.67783   | coding    |
| MSTRG. 11761.1  | -1.59907  | noncoding |
| MSTRG. 11782.1  | 0.127015  | coding    |
| MSTRG. 11783.1  | 1.68438   | coding    |
| MSTRG. 11783.4  | 0.87105   | coding    |
| MSTRG. 11783.3  | 1.46885   | coding    |
| MSTRG. 11792.1  | 0.284429  | coding    |
| MSTRG. 11792.3  | 0.826479  | coding    |
| MSTRG. 11792.2  | 0.978463  | coding    |
| MSTRG. 11792.4  | 2.16325   | coding    |
| MSTRG. 11792.13 | 1.33944   | coding    |
| MSTRG. 11793.1  | -1.95863  | noncoding |
| MSTRG. 11794.1  | -0.463169 | noncoding |
| MSTRG. 11785.1  | 1.78102   | coding    |
| MSTRG. 11786.2  | -0.891487 | noncoding |
| MSTRG. 11788.1  | 1.538     | coding    |
| MSTRG. 11788.2  | 1.28537   | coding    |
| MSTRG. 11788.4  | 1.18841   | coding    |
| MSTRG. 11795.1  | -1.89396  | noncoding |
| MSTRG. 11805.1  | -2.46695  | noncoding |
| MSTRG. 11806.1  | 1.2163    | coding    |
| MSTRG. 11807.1  | -1.41231  | noncoding |
| MSTRG. 11810.2  | 0.441132  | coding    |
| MSTRG. 11814.4  | 0.83372   | coding    |
| MSTRG. 11800.1  | -0.81398  | noncoding |
| MSTRG. 11802.3  | 0.141212  | coding    |
| MSTRG. 11802.4  | -0.222356 | noncoding |
| MSTRG. 11802.5  | 0.024165  | coding    |
| MSTRG. 11820.3  | 1.4511    | coding    |
| MSTRG. 11819.1  | 0.019563  | coding    |
| MSTRG. 11834.2  | 0.819376  | coding    |
| MSTRG. 11834.3  | -0.589939 | noncoding |
| MSTRG. 11838.1  | -1.01559  | noncoding |
| MSTRG. 11841.4  | -1.34832  | noncoding |
| MSTRG. 11842.3  | 1.11773   | coding    |
| MSTRG. 11842.6  | 0.254006  | coding    |
| MSTRG. 11821.2  | 0.116496  | coding    |
| MSTRG. 11824.2  | -0.10009  | noncoding |
| MSTRG. 11824.3  | 0.131071  | coding    |
| MSTRG. 11824.4  | 0.416429  | coding    |
| MSTRG. 11824.5  | 0.449862  | coding    |
| MSTRG. 11825.3  | -0.317754 | noncoding |



|                 |            |           |
|-----------------|------------|-----------|
| MSTRG. 11825. 4 | 0. 612211  | coding    |
| MSTRG. 11827. 1 | -2. 15603  | noncoding |
| MSTRG. 11827. 3 | -1. 95992  | noncoding |
| MSTRG. 11827. 2 | -1. 75331  | noncoding |
| MSTRG. 11828. 1 | -2. 20738  | noncoding |
| MSTRG. 11847. 2 | 1. 4339    | coding    |
| MSTRG. 11852. 1 | 2. 263     | coding    |
| MSTRG. 11852. 2 | 0. 551971  | coding    |
| MSTRG. 11852. 3 | 0. 748853  | coding    |
| MSTRG. 11852. 4 | 0. 04449   | coding    |
| MSTRG. 11852. 5 | 0. 247744  | coding    |
| MSTRG. 11860. 1 | -0. 89513  | noncoding |
| MSTRG. 11861. 1 | 0. 956823  | coding    |
| MSTRG. 11854. 1 | -2. 52424  | noncoding |
| MSTRG. 11867. 3 | 0. 940313  | coding    |
| MSTRG. 11867. 4 | -0. 084349 | noncoding |
| MSTRG. 11867. 5 | -0. 534418 | noncoding |
| MSTRG. 11872. 1 | 1. 05476   | coding    |
| MSTRG. 11873. 2 | 0. 52753   | coding    |
| MSTRG. 11873. 4 | 1. 62961   | coding    |
| MSTRG. 11873. 3 | 0. 902631  | coding    |
| MSTRG. 11873. 7 | -0. 055616 | noncoding |
| MSTRG. 11873. 8 | 0. 584692  | coding    |
| MSTRG. 11873. 6 | 2. 1396    | coding    |
| MSTRG. 11875. 1 | -1. 77325  | noncoding |
| MSTRG. 11876. 1 | 2. 23737   | coding    |
| MSTRG. 11876. 3 | 2. 93394   | coding    |
| MSTRG. 11882. 3 | 2. 81856   | coding    |
| MSTRG. 11882. 4 | 2. 85296   | coding    |
| MSTRG. 11889. 1 | 1. 90861   | coding    |
| MSTRG. 11889. 2 | 2. 2471    | coding    |
| MSTRG. 11890. 1 | -0. 427074 | noncoding |
| MSTRG. 11901. 1 | -0. 939359 | noncoding |
| MSTRG. 11901. 2 | -0. 768769 | noncoding |
| MSTRG. 11902. 1 | -0. 0987   | noncoding |
| MSTRG. 11923. 1 | -1. 43898  | noncoding |
| MSTRG. 11924. 1 | -0. 540168 | noncoding |
| MSTRG. 11929. 1 | -2. 18002  | noncoding |
| MSTRG. 11950. 1 | -2. 56833  | noncoding |
| MSTRG. 11951. 1 | -0. 694943 | noncoding |
| MSTRG. 11960. 1 | -2. 24619  | noncoding |
| MSTRG. 11968. 1 | 0. 017362  | coding    |
| MSTRG. 11969. 1 | -0. 256413 | noncoding |
| MSTRG. 11970. 1 | 0. 01134   | coding    |
| MSTRG. 11973. 4 | 1. 68474   | coding    |
| MSTRG. 11973. 3 | 1. 61969   | coding    |
| MSTRG. 11973. 2 | -0. 313798 | noncoding |
| MSTRG. 11973. 1 | 1. 54962   | coding    |
| MSTRG. 11974. 1 | 0. 854185  | coding    |
| MSTRG. 11974. 2 | 1. 04358   | coding    |
| MSTRG. 11974. 3 | 1. 20451   | coding    |
| MSTRG. 11973. 7 | -2. 07887  | noncoding |
| MSTRG. 11973. 8 | -1. 5      | noncoding |
| MSTRG. 11973. 9 | 0. 241994  | coding    |

|                  |            |           |
|------------------|------------|-----------|
| MSTRG. 11973. 10 | -1. 94634  | noncoding |
| MSTRG. 11973. 11 | -1. 94529  | noncoding |
| MSTRG. 11973. 12 | -2. 09684  | noncoding |
| MSTRG. 11973. 13 | -1. 46479  | noncoding |
| MSTRG. 11973. 14 | -1. 10834  | noncoding |
| MSTRG. 11973. 15 | -1. 20677  | noncoding |
| MSTRG. 11973. 16 | -1. 57034  | noncoding |
| MSTRG. 11973. 17 | -1. 83903  | noncoding |
| MSTRG. 11973. 18 | -1. 68178  | noncoding |
| MSTRG. 11973. 19 | -2. 0925   | noncoding |
| MSTRG. 11973. 20 | -1. 89897  | noncoding |
| MSTRG. 11973. 21 | -1. 70674  | noncoding |
| MSTRG. 11973. 22 | -1. 93203  | noncoding |
| MSTRG. 11973. 23 | -1. 88203  | noncoding |
| MSTRG. 11973. 24 | -1. 82197  | noncoding |
| MSTRG. 11958. 1  | 1. 29034   | coding    |
| MSTRG. 11958. 2  | 1. 15901   | coding    |
| MSTRG. 11972. 1  | -0. 814012 | noncoding |
| MSTRG. 11978. 2  | -0. 035667 | noncoding |
| MSTRG. 11978. 1  | 1. 54309   | coding    |
| MSTRG. 11979. 1  | -2. 32698  | noncoding |
| MSTRG. 11978. 4  | 1. 62868   | coding    |
| MSTRG. 11978. 5  | 1. 57599   | coding    |
| MSTRG. 11985. 2  | 1. 84576   | coding    |
| MSTRG. 11986. 4  | 1. 55977   | coding    |
| MSTRG. 11987. 1  | -1. 58605  | noncoding |
| MSTRG. 11995. 1  | 2. 31485   | coding    |
| MSTRG. 11996. 1  | -0. 530007 | noncoding |
| MSTRG. 11995. 6  | 2. 08097   | coding    |
| MSTRG. 11995. 5  | 1. 86465   | coding    |
| MSTRG. 11995. 7  | 2. 00352   | coding    |
| MSTRG. 11995. 8  | 2. 31748   | coding    |
| MSTRG. 11995. 9  | 2. 21243   | coding    |
| MSTRG. 11991. 1  | -0. 557283 | noncoding |
| MSTRG. 11994. 2  | 0. 810388  | coding    |
| MSTRG. 11994. 3  | 0. 662544  | coding    |
| MSTRG. 12000. 1  | 2. 66385   | coding    |
| MSTRG. 12004. 5  | 1. 114     | coding    |
| MSTRG. 12004. 6  | 2. 16129   | coding    |
| MSTRG. 12004. 7  | 1. 70408   | coding    |
| MSTRG. 12004. 8  | 2. 09613   | coding    |
| MSTRG. 12004. 9  | 1. 89981   | coding    |
| MSTRG. 12004. 10 | 0. 995269  | coding    |
| MSTRG. 12005. 1  | 0. 518171  | coding    |
| MSTRG. 12004. 11 | 1. 67006   | coding    |
| MSTRG. 12006. 4  | -0. 538272 | noncoding |
| MSTRG. 12007. 1  | -1. 20071  | noncoding |
| MSTRG. 12008. 1  | -1. 66761  | noncoding |
| MSTRG. 12009. 1  | -2. 04626  | noncoding |
| MSTRG. 12019. 2  | 0. 34641   | coding    |
| MSTRG. 12019. 3  | 0. 045737  | coding    |
| MSTRG. 12027. 2  | 1. 17471   | coding    |
| MSTRG. 12023. 1  | -0. 388573 | noncoding |
| MSTRG. 12030. 1  | 0. 25946   | coding    |

|                  |            |           |
|------------------|------------|-----------|
| MSTRG. 12030. 3  | 0. 270463  | coding    |
| MSTRG. 12034. 4  | -0. 424655 | noncoding |
| MSTRG. 12035. 1  | 2. 19661   | coding    |
| MSTRG. 12039. 1  | -1. 21667  | noncoding |
| MSTRG. 12040. 1  | 0. 030776  | coding    |
| MSTRG. 12041. 3  | 2. 47857   | coding    |
| MSTRG. 12042. 1  | 0. 47891   | coding    |
| MSTRG. 12043. 1  | -0. 155726 | noncoding |
| MSTRG. 12044. 1  | -0. 629114 | noncoding |
| MSTRG. 12045. 3  | -0. 031412 | noncoding |
| MSTRG. 12045. 4  | 1. 49855   | coding    |
| MSTRG. 12047. 3  | 0. 675659  | coding    |
| MSTRG. 12053. 2  | 1. 65201   | coding    |
| MSTRG. 12053. 3  | 1. 06142   | coding    |
| MSTRG. 12054. 1  | 0. 994646  | coding    |
| MSTRG. 12057. 4  | -0. 715777 | noncoding |
| MSTRG. 12055. 5  | 0. 664883  | coding    |
| MSTRG. 12055. 6  | 0. 014542  | coding    |
| MSTRG. 12055. 7  | -0. 176606 | noncoding |
| MSTRG. 12055. 8  | 0. 456393  | coding    |
| MSTRG. 12055. 9  | -0. 536459 | noncoding |
| MSTRG. 12055. 10 | -0. 323953 | noncoding |
| MSTRG. 12055. 11 | -1. 03966  | noncoding |
| MSTRG. 12055. 12 | -0. 58468  | noncoding |
| MSTRG. 12055. 13 | 0. 284513  | coding    |
| MSTRG. 12055. 14 | -0. 355895 | noncoding |
| MSTRG. 12059. 1  | 0. 243014  | coding    |
| MSTRG. 12049. 1  | -1. 37252  | noncoding |
| MSTRG. 12050. 1  | -1. 88328  | noncoding |
| MSTRG. 12051. 1  | -2. 36325  | noncoding |
| MSTRG. 12069. 1  | -1. 47932  | noncoding |
| MSTRG. 12069. 2  | 0. 004981  | coding    |
| MSTRG. 12069. 5  | -0. 280216 | noncoding |
| MSTRG. 12070. 1  | -0. 894587 | noncoding |
| MSTRG. 12069. 7  | -0. 120061 | noncoding |
| MSTRG. 12072. 3  | 1. 80744   | coding    |
| MSTRG. 12072. 10 | 1. 76748   | coding    |
| MSTRG. 12072. 9  | 1. 70845   | coding    |
| MSTRG. 12072. 12 | 1. 19165   | coding    |
| MSTRG. 12080. 1  | 1. 75602   | coding    |
| MSTRG. 12079. 1  | -2. 41468  | noncoding |
| MSTRG. 12088. 1  | -0. 825156 | noncoding |
| MSTRG. 12093. 2  | 2. 26779   | coding    |
| MSTRG. 12095. 3  | 1. 03424   | coding    |
| MSTRG. 12098. 1  | 1. 69436   | coding    |
| MSTRG. 12099. 2  | 1. 3166    | coding    |
| MSTRG. 12096. 1  | -1. 73554  | noncoding |
| MSTRG. 12100. 1  | 2. 11713   | coding    |
| MSTRG. 12100. 2  | 2. 02856   | coding    |
| MSTRG. 12100. 3  | 1. 90644   | coding    |
| MSTRG. 12102. 1  | -1. 03606  | noncoding |
| MSTRG. 12108. 4  | 2. 23051   | coding    |
| MSTRG. 12108. 1  | 2. 24126   | coding    |
| MSTRG. 12108. 9  | 2. 26562   | coding    |

|                  |            |           |
|------------------|------------|-----------|
| MSTRG. 12108. 8  | 2. 16603   | coding    |
| MSTRG. 12108. 12 | -1. 74837  | noncoding |
| MSTRG. 12104. 3  | 1. 79676   | coding    |
| MSTRG. 12121. 2  | 1. 2821    | coding    |
| MSTRG. 12121. 5  | 1. 12245   | coding    |
| MSTRG. 12123. 5  | -0. 044921 | noncoding |
| MSTRG. 12123. 2  | 0. 051     | coding    |
| MSTRG. 12123. 4  | 0. 09536   | coding    |
| MSTRG. 12123. 1  | 0. 390743  | coding    |
| MSTRG. 12123. 3  | 0. 28911   | coding    |
| MSTRG. 12123. 6  | -2. 25615  | noncoding |
| MSTRG. 12124. 1  | -0. 336635 | noncoding |
| MSTRG. 12124. 2  | 0. 026647  | coding    |
| MSTRG. 12125. 1  | -0. 107019 | noncoding |
| MSTRG. 12114. 2  | 0. 482905  | coding    |
| MSTRG. 12130. 3  | 0. 809729  | coding    |
| MSTRG. 12131. 1  | -2. 14041  | noncoding |
| MSTRG. 12138. 1  | -0. 925489 | noncoding |
| MSTRG. 12145. 1  | -1. 48003  | noncoding |
| MSTRG. 12146. 1  | -1. 48361  | noncoding |
| MSTRG. 12147. 1  | -1. 84803  | noncoding |
| MSTRG. 12152. 1  | -1. 6225   | noncoding |
| MSTRG. 12153. 2  | 0. 170762  | coding    |
| MSTRG. 12157. 3  | 1. 00578   | coding    |
| MSTRG. 12157. 4  | 0. 871809  | coding    |
| MSTRG. 12157. 2  | 0. 276974  | coding    |
| MSTRG. 12157. 5  | 0. 475439  | coding    |
| MSTRG. 12159. 2  | 1. 12821   | coding    |
| MSTRG. 12159. 1  | 1. 86706   | coding    |
| MSTRG. 12159. 3  | 0. 724563  | coding    |
| MSTRG. 12160. 1  | 0. 472711  | coding    |
| MSTRG. 12161. 1  | -1. 61142  | noncoding |
| MSTRG. 12168. 3  | 1. 32405   | coding    |
| MSTRG. 12188. 1  | -1. 8168   | noncoding |
| MSTRG. 12189. 1  | 1. 13753   | coding    |
| MSTRG. 12189. 3  | 2. 07931   | coding    |
| MSTRG. 12195. 1  | 0. 603817  | coding    |
| MSTRG. 12196. 1  | 0. 281851  | coding    |
| MSTRG. 12197. 2  | -0. 036532 | noncoding |
| MSTRG. 12197. 3  | 2. 77276   | coding    |
| MSTRG. 12197. 4  | 2. 42048   | coding    |
| MSTRG. 12197. 5  | 0. 117312  | coding    |
| MSTRG. 12198. 1  | 0. 483862  | coding    |
| MSTRG. 12202. 1  | -2. 02018  | noncoding |
| MSTRG. 12233. 1  | -1. 32251  | noncoding |
| MSTRG. 12238. 1  | -0. 819525 | noncoding |
| MSTRG. 12246. 2  | -0. 465686 | noncoding |
| MSTRG. 12208. 1  | -2. 50346  | noncoding |
| MSTRG. 12214. 5  | 0. 100725  | coding    |
| MSTRG. 12214. 6  | -1. 09203  | noncoding |
| MSTRG. 12214. 8  | 0. 104859  | coding    |
| MSTRG. 12215. 1  | -1. 12008  | noncoding |
| MSTRG. 12207. 1  | -0. 619596 | noncoding |
| MSTRG. 12218. 5  | 1. 83711   | coding    |

|                 |            |           |
|-----------------|------------|-----------|
| MSTRG. 12218. 6 | 1. 61783   | coding    |
| MSTRG. 12224. 1 | -0. 38787  | noncoding |
| MSTRG. 12228. 1 | -0. 152161 | noncoding |
| MSTRG. 12274. 1 | -2. 57281  | noncoding |
| MSTRG. 12277. 1 | 1. 34093   | coding    |
| MSTRG. 12278. 2 | -1. 76602  | noncoding |
| MSTRG. 12279. 1 | -0. 314604 | noncoding |
| MSTRG. 12280. 1 | 0. 072568  | coding    |
| MSTRG. 12280. 2 | -1. 32751  | noncoding |
| MSTRG. 12280. 3 | -1. 0081   | noncoding |
| MSTRG. 12281. 1 | -0. 364617 | noncoding |
| MSTRG. 12281. 2 | -0. 995367 | noncoding |
| MSTRG. 12285. 2 | 2. 13202   | coding    |
| MSTRG. 12288. 2 | 0. 784252  | coding    |
| MSTRG. 12288. 3 | 1. 06652   | coding    |
| MSTRG. 12302. 2 | 1. 98174   | coding    |
| MSTRG. 12303. 1 | -1. 49704  | noncoding |
| MSTRG. 12302. 3 | 2. 0339    | coding    |
| MSTRG. 12302. 4 | 1. 12714   | coding    |
| MSTRG. 12302. 5 | 1. 26455   | coding    |
| MSTRG. 12320. 2 | 3. 63143   | coding    |
| MSTRG. 12320. 4 | 3. 83724   | coding    |
| MSTRG. 12320. 5 | 2. 12904   | coding    |
| MSTRG. 12320. 7 | 2. 8543    | coding    |
| MSTRG. 12322. 1 | 3. 01986   | coding    |
| MSTRG. 12323. 1 | -0. 100981 | noncoding |
| MSTRG. 12322. 3 | -0. 666188 | noncoding |
| MSTRG. 12347. 5 | 2. 85769   | coding    |
| MSTRG. 12347. 6 | 3. 10657   | coding    |
| MSTRG. 12347. 7 | 1. 59628   | coding    |
| MSTRG. 12347. 8 | 1. 56419   | coding    |
| MSTRG. 12351. 1 | -0. 58807  | noncoding |
| MSTRG. 12352. 1 | -1. 92225  | noncoding |
| MSTRG. 12340. 2 | 0. 35565   | coding    |
| MSTRG. 12340. 4 | 0. 825573  | coding    |
| MSTRG. 12340. 3 | 1. 02443   | coding    |
| MSTRG. 12341. 1 | 0. 004138  | coding    |
| MSTRG. 12342. 1 | -0. 476239 | noncoding |
| MSTRG. 12353. 1 | -1. 48284  | noncoding |
| MSTRG. 12356. 1 | -1. 72739  | noncoding |
| MSTRG. 12355. 2 | 1. 95023   | coding    |
| MSTRG. 12360. 3 | 3. 37066   | coding    |
| MSTRG. 12359. 1 | -2. 27835  | noncoding |
| MSTRG. 12416. 1 | 0. 292854  | coding    |
| MSTRG. 12425. 1 | -1. 13775  | noncoding |
| MSTRG. 12426. 2 | 0. 511977  | coding    |
| MSTRG. 12433. 1 | -1. 64664  | noncoding |
| MSTRG. 12434. 4 | 2. 57503   | coding    |
| MSTRG. 12434. 5 | 2. 40022   | coding    |
| MSTRG. 12434. 7 | 2. 51971   | coding    |
| MSTRG. 12434. 8 | 2. 74053   | coding    |
| MSTRG. 12435. 2 | 2. 23606   | coding    |
| MSTRG. 12439. 2 | 2. 23085   | coding    |
| MSTRG. 12440. 1 | 0. 967029  | coding    |

|                 |            |           |
|-----------------|------------|-----------|
| MSTRG. 12441. 1 | 0. 559619  | coding    |
| MSTRG. 12442. 1 | -0. 970423 | noncoding |
| MSTRG. 12442. 2 | -0. 826881 | noncoding |
| MSTRG. 12441. 2 | -0. 376391 | noncoding |
| MSTRG. 12439. 3 | -0. 779732 | noncoding |
| MSTRG. 12439. 4 | -0. 255672 | noncoding |
| MSTRG. 12384. 2 | 1. 73507   | coding    |
| MSTRG. 12384. 1 | 1. 79359   | coding    |
| MSTRG. 12384. 3 | 1. 57867   | coding    |
| MSTRG. 12389. 1 | -0. 84801  | noncoding |
| MSTRG. 12390. 3 | 0. 413036  | coding    |
| MSTRG. 12391. 1 | 0. 998413  | coding    |
| MSTRG. 12391. 2 | 0. 17565   | coding    |
| MSTRG. 12392. 1 | -1. 91181  | noncoding |
| MSTRG. 12395. 1 | -1. 44117  | noncoding |
| MSTRG. 12407. 1 | 1. 00185   | coding    |
| MSTRG. 12400. 2 | 0. 989362  | coding    |
| MSTRG. 12447. 5 | 2. 6082    | coding    |
| MSTRG. 12448. 1 | -1. 53519  | noncoding |
| MSTRG. 12449. 1 | 0. 925093  | coding    |
| MSTRG. 12450. 1 | 0. 489575  | coding    |
| MSTRG. 12444. 1 | -1. 8081   | noncoding |
| MSTRG. 12445. 2 | -0. 397876 | noncoding |
| MSTRG. 12474. 3 | -0. 166697 | noncoding |
| MSTRG. 12474. 5 | 0. 351488  | coding    |
| MSTRG. 12474. 2 | -0. 229903 | noncoding |
| MSTRG. 12474. 4 | 0. 046421  | coding    |
| MSTRG. 12474. 1 | -0. 432674 | noncoding |
| MSTRG. 12474. 7 | 0. 200358  | coding    |
| MSTRG. 12474. 6 | -0. 315251 | noncoding |
| MSTRG. 12474. 9 | 0. 27825   | coding    |
| MSTRG. 12474. 8 | -0. 316489 | noncoding |
| MSTRG. 12475. 1 | 1. 92186   | coding    |
| MSTRG. 12475. 2 | 1. 70059   | coding    |
| MSTRG. 12475. 3 | 1. 8488    | coding    |
| MSTRG. 12475. 5 | 1. 3898    | coding    |
| MSTRG. 12476. 1 | 1. 2282    | coding    |
| MSTRG. 12476. 2 | 1. 51121   | coding    |
| MSTRG. 12476. 3 | 1. 26972   | coding    |
| MSTRG. 12476. 7 | 1. 27768   | coding    |
| MSTRG. 12476. 8 | 1. 24529   | coding    |
| MSTRG. 12476. 6 | 0. 951637  | coding    |
| MSTRG. 12476. 9 | 0. 781148  | coding    |
| MSTRG. 12494. 1 | -0. 017672 | noncoding |
| MSTRG. 12495. 1 | -0. 385054 | noncoding |
| MSTRG. 12495. 2 | -0. 019491 | noncoding |
| MSTRG. 12504. 1 | -2. 17399  | noncoding |
| MSTRG. 12504. 2 | -1. 12204  | noncoding |
| MSTRG. 12505. 1 | 0. 067196  | coding    |
| MSTRG. 12506. 1 | -0. 454122 | noncoding |
| MSTRG. 12507. 1 | -2. 12276  | noncoding |
| MSTRG. 12505. 2 | -1. 0486   | noncoding |
| MSTRG. 12501. 1 | 1. 42755   | coding    |
| MSTRG. 12501. 3 | 0. 029018  | coding    |

|               |           |           |
|---------------|-----------|-----------|
| MSTRG.12509.1 | 0.77454   | coding    |
| MSTRG.12510.2 | 1.3902    | coding    |
| MSTRG.12510.3 | 1.29375   | coding    |
| MSTRG.12510.4 | 0.711183  | coding    |
| MSTRG.12517.3 | 1.58174   | coding    |
| MSTRG.12521.1 | -1.4086   | noncoding |
| MSTRG.12525.2 | 1.65036   | coding    |
| MSTRG.12525.1 | 1.36293   | coding    |
| MSTRG.12525.3 | 1.35212   | coding    |
| MSTRG.12528.3 | 1.42858   | coding    |
| MSTRG.12537.2 | -0.05806  | noncoding |
| MSTRG.12553.1 | -0.813027 | noncoding |
| MSTRG.12558.1 | -1.22402  | noncoding |
| MSTRG.12558.2 | -2.06803  | noncoding |
| MSTRG.12558.3 | -1.55783  | noncoding |
| MSTRG.12560.1 | -0.324914 | noncoding |
| MSTRG.12550.2 | 2.04751   | coding    |
| MSTRG.12550.3 | 2.11634   | coding    |
| MSTRG.12569.1 | -2.16651  | noncoding |
| MSTRG.12572.1 | -1.82019  | noncoding |
| MSTRG.12573.1 | -2.24027  | noncoding |
| MSTRG.12576.3 | -0.28531  | noncoding |
| MSTRG.12576.4 | -0.278045 | noncoding |
| MSTRG.12577.7 | 1.26799   | coding    |
| MSTRG.12577.5 | 1.66089   | coding    |
| MSTRG.12577.4 | 1.05292   | coding    |
| MSTRG.12578.4 | 1.82663   | coding    |
| MSTRG.12588.1 | 3.33315   | coding    |
| MSTRG.12588.2 | 3.32157   | coding    |
| MSTRG.12588.3 | 3.34329   | coding    |
| MSTRG.12588.5 | 2.92258   | coding    |
| MSTRG.12589.1 | -0.78515  | noncoding |
| MSTRG.12589.2 | -1.33857  | noncoding |
| MSTRG.12589.3 | 0.72548   | coding    |
| MSTRG.12589.4 | -0.840601 | noncoding |
| MSTRG.12591.1 | -0.172656 | noncoding |
| MSTRG.12595.2 | -0.225293 | noncoding |
| MSTRG.12596.3 | 1.01723   | coding    |
| MSTRG.12596.4 | 0.457041  | coding    |
| MSTRG.12596.5 | 0.52756   | coding    |
| MSTRG.12599.1 | -0.573472 | noncoding |
| MSTRG.12598.4 | 1.20513   | coding    |
| MSTRG.12600.1 | -1.49923  | noncoding |
| MSTRG.12598.5 | 1.12042   | coding    |
| MSTRG.12598.6 | -0.149511 | noncoding |
| MSTRG.12598.8 | 1.44602   | coding    |
| MSTRG.12598.9 | 1.26634   | coding    |
| MSTRG.12601.1 | -1.45829  | noncoding |
| MSTRG.12602.1 | -0.782664 | noncoding |
| MSTRG.12602.3 | -0.851907 | noncoding |
| MSTRG.12602.2 | -1.00556  | noncoding |
| MSTRG.12602.4 | -1.2748   | noncoding |
| MSTRG.12603.1 | 0.674313  | coding    |
| MSTRG.12603.2 | 0.699255  | coding    |

|               |           |           |
|---------------|-----------|-----------|
| MSTRG.12603.3 | 0.539987  | coding    |
| MSTRG.12603.4 | 0.341585  | coding    |
| MSTRG.12607.2 | 1.10774   | coding    |
| MSTRG.12607.3 | 0.446156  | coding    |
| MSTRG.12611.5 | 2.51168   | coding    |
| MSTRG.12611.3 | 2.43568   | coding    |
| MSTRG.12611.7 | 2.49335   | coding    |
| MSTRG.12612.1 | 0.282206  | coding    |
| MSTRG.12612.2 | 0.314968  | coding    |
| MSTRG.12617.2 | 0.888961  | coding    |
| MSTRG.12617.3 | 0.904078  | coding    |
| MSTRG.12619.1 | -0.365414 | noncoding |
| MSTRG.12618.2 | 0.376228  | coding    |
| MSTRG.12618.3 | 0.118836  | coding    |
| MSTRG.12619.2 | -0.112687 | noncoding |
| MSTRG.12619.3 | -0.189926 | noncoding |
| MSTRG.12642.1 | 0.290468  | coding    |
| MSTRG.12643.1 | 0.467251  | coding    |
| MSTRG.12646.3 | 0.052299  | coding    |
| MSTRG.12647.1 | -0.414586 | noncoding |
| MSTRG.12642.2 | 0.497976  | coding    |
| MSTRG.12648.1 | -2.10361  | noncoding |
| MSTRG.12646.5 | 1.97066   | coding    |
| MSTRG.12646.4 | 1.18913   | coding    |
| MSTRG.12646.6 | -0.089417 | noncoding |
| MSTRG.12652.3 | 1.48637   | coding    |
| MSTRG.12652.4 | -1.20143  | noncoding |
| MSTRG.12623.3 | 1.7573    | coding    |
| MSTRG.12623.4 | 1.51764   | coding    |
| MSTRG.12623.6 | 0.529059  | coding    |
| MSTRG.12623.5 | 0.603587  | coding    |
| MSTRG.12625.2 | 0.860019  | coding    |
| MSTRG.12625.3 | 1.2938    | coding    |
| MSTRG.12627.1 | -0.0476   | noncoding |
| MSTRG.12627.2 | 0.040774  | coding    |
| MSTRG.12633.2 | 2.6277    | coding    |
| MSTRG.12635.1 | 2.48456   | coding    |
| MSTRG.12655.1 | -0.737566 | noncoding |
| MSTRG.12660.1 | -0.087352 | noncoding |
| MSTRG.12661.2 | 0.287286  | coding    |
| MSTRG.12664.1 | 0.702434  | coding    |
| MSTRG.12674.3 | 0.453166  | coding    |
| MSTRG.12676.1 | 1.44068   | coding    |
| MSTRG.12677.2 | 1.2621    | coding    |
| MSTRG.12680.1 | -1.89125  | noncoding |
| MSTRG.12681.2 | 1.96385   | coding    |
| MSTRG.12682.1 | 0.832324  | coding    |
| MSTRG.12685.1 | 1.09778   | coding    |
| MSTRG.12685.2 | 1.52547   | coding    |
| MSTRG.12686.1 | -1.81228  | noncoding |
| MSTRG.12683.2 | 2.56893   | coding    |
| MSTRG.12709.4 | -0.07386  | noncoding |
| MSTRG.12711.1 | 0.418033  | coding    |
| MSTRG.12711.2 | 0.40742   | coding    |



|               |           |           |
|---------------|-----------|-----------|
| MSTRG.12711.3 | 0.565153  | coding    |
| MSTRG.12709.6 | 0.559522  | coding    |
| MSTRG.12713.1 | -0.347082 | noncoding |
| MSTRG.12715.1 | 0.49267   | coding    |
| MSTRG.12701.1 | -2.49281  | noncoding |
| MSTRG.12716.1 | 3.16725   | coding    |
| MSTRG.12716.2 | 3.10058   | coding    |
| MSTRG.12716.3 | 1.02343   | coding    |
| MSTRG.12717.1 | 0.314732  | coding    |
| MSTRG.12716.4 | 0.837974  | coding    |
| MSTRG.12718.1 | 0.457517  | coding    |
| MSTRG.12716.5 | 0.237639  | coding    |
| MSTRG.12705.2 | -1.95434  | noncoding |
| MSTRG.12705.4 | 0.154558  | coding    |
| MSTRG.12705.3 | 3.12958   | coding    |
| MSTRG.12705.5 | 2.45567   | coding    |
| MSTRG.12730.2 | 0.182311  | coding    |
| MSTRG.12731.3 | 1.27158   | coding    |
| MSTRG.12731.2 | 1.94387   | coding    |
| MSTRG.12731.4 | 0.608967  | coding    |
| MSTRG.12731.6 | 1.77081   | coding    |
| MSTRG.12731.7 | 1.72328   | coding    |
| MSTRG.12731.8 | 1.93315   | coding    |
| MSTRG.12720.2 | 1.57306   | coding    |
| MSTRG.12721.3 | 0.346684  | coding    |
| MSTRG.12722.1 | -2.45365  | noncoding |
| MSTRG.12725.1 | -2.54069  | noncoding |
| MSTRG.12725.2 | -2.60012  | noncoding |
| MSTRG.12738.3 | 0.303429  | coding    |
| MSTRG.12746.1 | 0.606335  | coding    |
| MSTRG.12759.1 | -2.61337  | noncoding |
| MSTRG.12768.1 | -0.868587 | noncoding |
| MSTRG.12769.1 | -2.13713  | noncoding |
| MSTRG.12791.1 | 2.08945   | coding    |
| MSTRG.12791.2 | 1.48561   | coding    |
| MSTRG.12792.1 | 2.12183   | coding    |
| MSTRG.12792.2 | 2.14241   | coding    |
| MSTRG.12792.3 | 2.04469   | coding    |
| MSTRG.12792.6 | 0.542217  | coding    |
| MSTRG.12793.2 | -0.26237  | noncoding |
| MSTRG.12794.1 | -0.403471 | noncoding |
| MSTRG.12794.2 | -1.18937  | noncoding |
| MSTRG.12777.1 | 2.28365   | coding    |
| MSTRG.12778.1 | 2.23854   | coding    |
| MSTRG.12784.1 | -2.44226  | noncoding |
| MSTRG.12785.2 | 1.36185   | coding    |
| MSTRG.12785.3 | 1.31962   | coding    |
| MSTRG.12785.4 | 1.48688   | coding    |
| MSTRG.12789.3 | 2.40784   | coding    |
| MSTRG.12800.1 | 0.103747  | coding    |
| MSTRG.12800.2 | -0.238928 | noncoding |
| MSTRG.12800.3 | -0.173402 | noncoding |
| MSTRG.12804.2 | 1.25017   | coding    |
| MSTRG.12805.3 | 0.701589  | coding    |

|                |           |           |
|----------------|-----------|-----------|
| MSTRG.12806.2  | 1.71785   | coding    |
| MSTRG.12806.1  | 1.71423   | coding    |
| MSTRG.12806.4  | 2.33299   | coding    |
| MSTRG.12806.5  | 1.41528   | coding    |
| MSTRG.12808.2  | 1.4014    | coding    |
| MSTRG.12810.1  | 0.095834  | coding    |
| MSTRG.12813.1  | 0.372467  | coding    |
| MSTRG.12816.1  | -0.478852 | noncoding |
| MSTRG.12829.1  | 2.03464   | coding    |
| MSTRG.12829.6  | 2.34104   | coding    |
| MSTRG.12829.4  | 1.55947   | coding    |
| MSTRG.12829.7  | 2.63588   | coding    |
| MSTRG.12830.4  | 2.72532   | coding    |
| MSTRG.12831.1  | -1.47175  | noncoding |
| MSTRG.12835.1  | -1.71835  | noncoding |
| MSTRG.12826.1  | -1.12915  | noncoding |
| MSTRG.12826.2  | -0.081771 | noncoding |
| MSTRG.12827.1  | -1.98911  | noncoding |
| MSTRG.12839.2  | 0.529748  | coding    |
| MSTRG.12847.3  | 2.34865   | coding    |
| MSTRG.12847.4  | 2.35498   | coding    |
| MSTRG.12848.1  | -1.0502   | noncoding |
| MSTRG.12851.2  | 1.32989   | coding    |
| MSTRG.12851.3  | 0.829318  | coding    |
| MSTRG.12863.6  | 2.13119   | coding    |
| MSTRG.12863.7  | 2.09332   | coding    |
| MSTRG.12863.14 | 1.97929   | coding    |
| MSTRG.12863.16 | 2.04324   | coding    |
| MSTRG.12863.11 | 2.18021   | coding    |
| MSTRG.12863.13 | 2.06165   | coding    |
| MSTRG.12863.15 | 2.18605   | coding    |
| MSTRG.12863.12 | 2.42576   | coding    |
| MSTRG.12863.18 | 2.07973   | coding    |
| MSTRG.12863.17 | 1.95414   | coding    |
| MSTRG.12863.19 | -0.292743 | noncoding |
| MSTRG.12864.1  | 0.541629  | coding    |
| MSTRG.12863.20 | -1.866    | noncoding |
| MSTRG.12888.1  | 0.022044  | coding    |
| MSTRG.12890.2  | 0.924593  | coding    |
| MSTRG.12890.4  | 0.710816  | coding    |
| MSTRG.12907.3  | 2.69938   | coding    |
| MSTRG.12907.2  | 2.16908   | coding    |
| MSTRG.12907.4  | 1.26636   | coding    |
| MSTRG.12907.5  | -0.755917 | noncoding |
| MSTRG.12907.6  | 1.35739   | coding    |
| MSTRG.12912.3  | 2.88236   | coding    |
| MSTRG.12912.4  | 3.02694   | coding    |
| MSTRG.12914.1  | -1.00407  | noncoding |
| MSTRG.12933.4  | 1.78672   | coding    |
| MSTRG.12933.6  | 1.57017   | coding    |
| MSTRG.12933.5  | 1.16899   | coding    |
| MSTRG.12933.3  | 1.31951   | coding    |
| MSTRG.12933.7  | 1.43462   | coding    |
| MSTRG.12933.8  | 2.06774   | coding    |

|                  |            |           |
|------------------|------------|-----------|
| MSTRG. 12934. 1  | -0. 522127 | noncoding |
| MSTRG. 12919. 1  | -0. 585335 | noncoding |
| MSTRG. 12920. 1  | 0. 3654    | coding    |
| MSTRG. 12920. 2  | 0. 494972  | coding    |
| MSTRG. 12925. 1  | -2. 41943  | noncoding |
| MSTRG. 12925. 2  | -2. 07676  | noncoding |
| MSTRG. 12926. 1  | -2. 08975  | noncoding |
| MSTRG. 12938. 1  | -1. 58166  | noncoding |
| MSTRG. 12947. 3  | 1. 48851   | coding    |
| MSTRG. 12947. 2  | 1. 59811   | coding    |
| MSTRG. 12971. 1  | 0. 976636  | coding    |
| MSTRG. 12978. 1  | -1. 61982  | noncoding |
| MSTRG. 12978. 2  | -0. 172705 | noncoding |
| MSTRG. 12978. 3  | 0. 116221  | coding    |
| MSTRG. 12983. 5  | 1. 96119   | coding    |
| MSTRG. 12984. 1  | -1. 82639  | noncoding |
| MSTRG. 12939. 1  | 3. 00978   | coding    |
| MSTRG. 12939. 2  | 1. 55436   | coding    |
| MSTRG. 12939. 3  | 1. 7772    | coding    |
| MSTRG. 12940. 1  | -0. 391377 | noncoding |
| MSTRG. 12939. 4  | 2. 88559   | coding    |
| MSTRG. 12939. 5  | 0. 914726  | coding    |
| MSTRG. 12988. 1  | 0. 216093  | coding    |
| MSTRG. 13003. 1  | 1. 42938   | coding    |
| MSTRG. 13008. 1  | -0. 513418 | noncoding |
| MSTRG. 13008. 2  | -0. 335648 | noncoding |
| MSTRG. 13009. 1  | 0. 073105  | coding    |
| MSTRG. 13010. 1  | -2. 17693  | noncoding |
| MSTRG. 13012. 1  | 0. 498827  | coding    |
| MSTRG. 13013. 1  | -1. 00229  | noncoding |
| MSTRG. 13013. 2  | 0. 900322  | coding    |
| MSTRG. 13013. 6  | -0. 571279 | noncoding |
| MSTRG. 13013. 4  | 0. 783354  | coding    |
| MSTRG. 13013. 5  | 0. 725962  | coding    |
| MSTRG. 13014. 1  | -1. 00401  | noncoding |
| MSTRG. 13022. 1  | 0. 056237  | coding    |
| MSTRG. 13022. 2  | 0. 461399  | coding    |
| MSTRG. 13025. 2  | 0. 020736  | coding    |
| MSTRG. 13025. 4  | 0. 549216  | coding    |
| MSTRG. 13025. 5  | 0. 226978  | coding    |
| MSTRG. 13025. 7  | -0. 138035 | noncoding |
| MSTRG. 13025. 8  | -0. 005309 | noncoding |
| MSTRG. 13025. 9  | 0. 780544  | coding    |
| MSTRG. 13025. 10 | 0. 280547  | coding    |
| MSTRG. 13025. 11 | 0. 624651  | coding    |
| MSTRG. 13025. 12 | 0. 09214   | coding    |
| MSTRG. 13030. 3  | 2. 55701   | coding    |
| MSTRG. 13030. 1  | 3. 00561   | coding    |
| MSTRG. 13034. 1  | -1. 89353  | noncoding |
| MSTRG. 13034. 2  | -1. 57434  | noncoding |
| MSTRG. 13034. 3  | -1. 19212  | noncoding |
| MSTRG. 13040. 4  | 2. 74121   | coding    |
| MSTRG. 13040. 6  | 2. 52157   | coding    |
| MSTRG. 13039. 1  | -2. 02151  | noncoding |

|               |           |           |
|---------------|-----------|-----------|
| MSTRG.13048.1 | 2.5491    | coding    |
| MSTRG.13049.1 | -2.26781  | noncoding |
| MSTRG.13055.1 | -0.455234 | noncoding |
| MSTRG.13053.1 | -2.54877  | noncoding |
| MSTRG.13056.2 | 0.516322  | coding    |
| MSTRG.13061.1 | 1.41573   | coding    |
| MSTRG.13061.3 | 1.0874    | coding    |
| MSTRG.13062.1 | -1.20713  | noncoding |
| MSTRG.13061.5 | 0.615492  | coding    |
| MSTRG.13060.1 | 0.722573  | coding    |
| MSTRG.13063.1 | -0.311999 | noncoding |
| MSTRG.13065.2 | 0.974429  | coding    |
| MSTRG.13066.3 | 1.28974   | coding    |
| MSTRG.13068.1 | -2.34685  | noncoding |
| MSTRG.13077.4 | 1.4481    | coding    |
| MSTRG.13078.1 | 0.560036  | coding    |
| MSTRG.13079.2 | 0.593573  | coding    |
| MSTRG.13082.3 | -0.604242 | noncoding |
| MSTRG.13082.4 | -0.909128 | noncoding |
| MSTRG.13082.2 | 0.014768  | coding    |
| MSTRG.13087.1 | 1.84023   | coding    |
| MSTRG.13087.2 | 1.84193   | coding    |
| MSTRG.13087.4 | 1.58446   | coding    |
| MSTRG.13087.6 | 1.67743   | coding    |
| MSTRG.13091.2 | 1.46489   | coding    |
| MSTRG.13096.2 | 1.14083   | coding    |
| MSTRG.13106.2 | 2.59567   | coding    |
| MSTRG.13106.1 | 2.59627   | coding    |
| MSTRG.13106.3 | 2.59887   | coding    |
| MSTRG.13107.1 | -1.94279  | noncoding |
| MSTRG.13100.4 | 1.70971   | coding    |
| MSTRG.13110.4 | 2.28055   | coding    |
| MSTRG.13110.3 | 1.12646   | coding    |
| MSTRG.13110.5 | 1.38303   | coding    |
| MSTRG.13110.6 | 1.76974   | coding    |
| MSTRG.13110.7 | 1.041     | coding    |
| MSTRG.13111.1 | -1.08114  | noncoding |
| MSTRG.13112.1 | -0.73546  | noncoding |
| MSTRG.13115.1 | 1.60818   | coding    |
| MSTRG.13117.1 | -2.04258  | noncoding |
| MSTRG.13115.2 | 1.76783   | coding    |
| MSTRG.13118.2 | 0.134462  | coding    |
| MSTRG.13119.1 | 0.024114  | coding    |
| MSTRG.13120.1 | -2.01443  | noncoding |
| MSTRG.13118.4 | -0.381365 | noncoding |
| MSTRG.13118.5 | -0.008911 | noncoding |
| MSTRG.13143.4 | 3.28995   | coding    |
| MSTRG.13143.6 | 0.954713  | coding    |
| MSTRG.13143.5 | 2.00664   | coding    |
| MSTRG.13143.7 | 2.92208   | coding    |
| MSTRG.13144.1 | 0.692037  | coding    |
| MSTRG.13143.8 | 2.01397   | coding    |
| MSTRG.13143.9 | 1.86837   | coding    |
| MSTRG.13145.1 | -2.14847  | noncoding |

|                  |            |           |
|------------------|------------|-----------|
| MSTRG. 13146. 1  | 1. 21688   | coding    |
| MSTRG. 13143. 10 | -0. 722436 | noncoding |
| MSTRG. 13148. 1  | 0. 037761  | coding    |
| MSTRG. 13149. 1  | 0. 330767  | coding    |
| MSTRG. 13150. 1  | -0. 99526  | noncoding |
| MSTRG. 13151. 1  | -0. 5082   | noncoding |
| MSTRG. 13152. 1  | -0. 216107 | noncoding |
| MSTRG. 13152. 2  | 0. 252319  | coding    |
| MSTRG. 13143. 11 | -0. 077347 | noncoding |
| MSTRG. 13143. 12 | 2. 28017   | coding    |
| MSTRG. 13130. 1  | -1. 38866  | noncoding |
| MSTRG. 13134. 1  | -0. 231815 | noncoding |
| MSTRG. 13137. 1  | -0. 951021 | noncoding |
| MSTRG. 13138. 3  | 0. 756763  | coding    |
| MSTRG. 13138. 5  | -0. 140766 | noncoding |
| MSTRG. 13138. 6  | -1. 17314  | noncoding |
| MSTRG. 13139. 1  | -0. 251638 | noncoding |
| MSTRG. 13139. 2  | -0. 91419  | noncoding |
| MSTRG. 13139. 3  | 0. 396291  | coding    |
| MSTRG. 13139. 4  | 0. 699081  | coding    |
| MSTRG. 13139. 5  | 0. 655295  | coding    |
| MSTRG. 13128. 2  | 0. 687429  | coding    |
| MSTRG. 13128. 3  | 1. 03138   | coding    |
| MSTRG. 13128. 4  | 1. 1168    | coding    |
| MSTRG. 13154. 1  | -0. 667285 | noncoding |
| MSTRG. 13154. 2  | -1. 44807  | noncoding |
| MSTRG. 13154. 3  | -1. 18088  | noncoding |
| MSTRG. 13154. 4  | -1. 3949   | noncoding |
| MSTRG. 13155. 2  | 1. 63172   | coding    |
| MSTRG. 13162. 1  | -1. 52728  | noncoding |
| MSTRG. 13163. 1  | 1. 20086   | coding    |
| MSTRG. 13164. 1  | 0. 587417  | coding    |
| MSTRG. 13161. 6  | 3. 06476   | coding    |
| MSTRG. 13161. 4  | 3. 01894   | coding    |
| MSTRG. 13161. 7  | 3. 11039   | coding    |
| MSTRG. 13161. 5  | 2. 15194   | coding    |
| MSTRG. 13165. 1  | -1. 34069  | noncoding |
| MSTRG. 13159. 2  | 1. 71287   | coding    |
| MSTRG. 13159. 3  | 1. 91095   | coding    |
| MSTRG. 13159. 4  | 0. 588816  | coding    |
| MSTRG. 13166. 1  | 1. 06834   | coding    |
| MSTRG. 13170. 3  | -1. 42569  | noncoding |
| MSTRG. 13171. 1  | 1. 83535   | coding    |
| MSTRG. 13177. 1  | -0. 962759 | noncoding |
| MSTRG. 13177. 4  | -0. 040194 | noncoding |
| MSTRG. 13177. 5  | -1. 37291  | noncoding |
| MSTRG. 13174. 1  | 2. 32947   | coding    |
| MSTRG. 13181. 3  | 2. 37392   | coding    |
| MSTRG. 13181. 4  | 2. 32202   | coding    |
| MSTRG. 13181. 5  | 2. 25222   | coding    |
| MSTRG. 13179. 1  | -0. 421152 | noncoding |
| MSTRG. 13179. 3  | -0. 415876 | noncoding |
| MSTRG. 13179. 2  | 0. 16693   | coding    |
| MSTRG. 13180. 1  | -0. 2431   | noncoding |

|                  |            |           |
|------------------|------------|-----------|
| MSTRG. 13184. 1  | 0. 910948  | coding    |
| MSTRG. 13184. 2  | 1. 42532   | coding    |
| MSTRG. 13199. 1  | 0. 167143  | coding    |
| MSTRG. 13199. 2  | -0. 010832 | noncoding |
| MSTRG. 13201. 1  | -0. 96721  | noncoding |
| MSTRG. 13183. 1  | -2. 38764  | noncoding |
| MSTRG. 13206. 2  | -1. 40428  | noncoding |
| MSTRG. 13208. 1  | 1. 67706   | coding    |
| MSTRG. 13208. 4  | 2. 12928   | coding    |
| MSTRG. 13209. 1  | 0. 158276  | coding    |
| MSTRG. 13209. 2  | 1. 21444   | coding    |
| MSTRG. 13203. 1  | -1. 02991  | noncoding |
| MSTRG. 13217. 1  | -2. 15266  | noncoding |
| MSTRG. 13221. 2  | -0. 490852 | noncoding |
| MSTRG. 13222. 1  | 2. 00466   | coding    |
| MSTRG. 13222. 2  | 1. 79028   | coding    |
| MSTRG. 13222. 3  | 1. 80007   | coding    |
| MSTRG. 13222. 6  | 1. 37404   | coding    |
| MSTRG. 13223. 1  | -0. 151363 | noncoding |
| MSTRG. 13224. 1  | 0. 183544  | coding    |
| MSTRG. 13222. 7  | -0. 749058 | noncoding |
| MSTRG. 13233. 1  | 2. 45622   | coding    |
| MSTRG. 13237. 1  | 0. 12056   | coding    |
| MSTRG. 13241. 3  | 2. 29764   | coding    |
| MSTRG. 13241. 4  | 1. 22829   | coding    |
| MSTRG. 13241. 5  | 1. 23136   | coding    |
| MSTRG. 13241. 6  | 1. 36844   | coding    |
| MSTRG. 13243. 1  | 1. 27528   | coding    |
| MSTRG. 13243. 2  | 0. 301428  | coding    |
| MSTRG. 13243. 3  | 0. 122352  | coding    |
| MSTRG. 13244. 3  | 0. 993954  | coding    |
| MSTRG. 13261. 4  | 2. 23731   | coding    |
| MSTRG. 13261. 5  | 2. 22773   | coding    |
| MSTRG. 13261. 6  | 2. 24379   | coding    |
| MSTRG. 13261. 7  | 2. 23713   | coding    |
| MSTRG. 13261. 1  | 2. 11142   | coding    |
| MSTRG. 13261. 8  | 2. 02946   | coding    |
| MSTRG. 13261. 9  | 1. 96507   | coding    |
| MSTRG. 13261. 10 | 1. 93057   | coding    |
| MSTRG. 13261. 11 | 2. 07857   | coding    |
| MSTRG. 13261. 12 | 2. 04243   | coding    |
| MSTRG. 13261. 13 | 1. 96401   | coding    |
| MSTRG. 13261. 14 | 1. 86072   | coding    |
| MSTRG. 13263. 1  | -0. 766721 | noncoding |
| MSTRG. 13266. 1  | -1. 52711  | noncoding |
| MSTRG. 13267. 1  | -0. 348342 | noncoding |
| MSTRG. 13267. 2  | -0. 452917 | noncoding |
| MSTRG. 13267. 3  | -1. 60555  | noncoding |
| MSTRG. 13267. 4  | -1. 30417  | noncoding |
| MSTRG. 13254. 2  | -1. 56468  | noncoding |
| MSTRG. 13254. 1  | -2. 18078  | noncoding |
| MSTRG. 13253. 3  | 0. 535965  | coding    |
| MSTRG. 13253. 4  | 0. 704502  | coding    |
| MSTRG. 13259. 2  | 0. 85495   | coding    |

|                  |            |           |
|------------------|------------|-----------|
| MSTRG. 13260. 1  | -0. 551164 | noncoding |
| MSTRG. 13268. 1  | -0. 703673 | noncoding |
| MSTRG. 13268. 2  | 0. 606839  | coding    |
| MSTRG. 13268. 3  | -1. 15081  | noncoding |
| MSTRG. 13268. 4  | 0. 291183  | coding    |
| MSTRG. 13268. 5  | -0. 352125 | noncoding |
| MSTRG. 13269. 1  | -0. 632614 | noncoding |
| MSTRG. 13268. 8  | -0. 349318 | noncoding |
| MSTRG. 13270. 1  | -0. 315675 | noncoding |
| MSTRG. 13273. 4  | 0. 997174  | coding    |
| MSTRG. 13281. 1  | 0. 435851  | coding    |
| MSTRG. 13281. 2  | -2. 49618  | noncoding |
| MSTRG. 13282. 2  | -2. 2718   | noncoding |
| MSTRG. 13284. 8  | 0. 745565  | coding    |
| MSTRG. 13284. 6  | 1. 13375   | coding    |
| MSTRG. 13284. 9  | 0. 243154  | coding    |
| MSTRG. 13284. 10 | -0. 912384 | noncoding |
| MSTRG. 13277. 1  | -0. 865292 | noncoding |
| MSTRG. 13277. 2  | -0. 569134 | noncoding |
| MSTRG. 13286. 3  | -1. 60818  | noncoding |
| MSTRG. 13287. 1  | -1. 34884  | noncoding |
| MSTRG. 13303. 1  | -0. 821123 | noncoding |
| MSTRG. 13305. 1  | -2. 12333  | noncoding |
| MSTRG. 13314. 1  | 0. 890907  | coding    |
| MSTRG. 13314. 3  | 1. 11981   | coding    |
| MSTRG. 13314. 2  | 1. 34888   | coding    |
| MSTRG. 13323. 1  | -1. 38231  | noncoding |
| MSTRG. 13323. 2  | -1. 80375  | noncoding |
| MSTRG. 13320. 3  | 1. 70257   | coding    |
| MSTRG. 13320. 4  | 0. 167447  | coding    |
| MSTRG. 13320. 5  | 1. 84532   | coding    |
| MSTRG. 13320. 6  | 0. 601205  | coding    |
| MSTRG. 13320. 7  | 0. 846721  | coding    |
| MSTRG. 13320. 9  | -0. 818745 | noncoding |
| MSTRG. 13324. 1  | -0. 02483  | noncoding |
| MSTRG. 13325. 1  | -0. 562241 | noncoding |
| MSTRG. 13327. 1  | 0. 470108  | coding    |
| MSTRG. 13329. 1  | 0. 058297  | coding    |
| MSTRG. 13331. 1  | -0. 521367 | noncoding |
| MSTRG. 13332. 1  | -2. 49729  | noncoding |
| MSTRG. 13332. 2  | -2. 56778  | noncoding |
| MSTRG. 13332. 3  | -2. 35278  | noncoding |
| MSTRG. 13334. 1  | -1. 24128  | noncoding |
| MSTRG. 13334. 4  | 0. 432019  | coding    |
| MSTRG. 13318. 1  | 0. 716008  | coding    |
| MSTRG. 13345. 1  | -0. 145537 | noncoding |
| MSTRG. 13356. 1  | 0. 97439   | coding    |
| MSTRG. 13357. 1  | -0. 24593  | noncoding |
| MSTRG. 13356. 3  | 1. 85697   | coding    |
| MSTRG. 13356. 4  | 1. 24838   | coding    |
| MSTRG. 13356. 5  | 0. 74655   | coding    |
| MSTRG. 13364. 2  | 1. 65384   | coding    |
| MSTRG. 13365. 1  | -2. 43354  | noncoding |
| MSTRG. 13366. 3  | -0. 020122 | noncoding |

|                  |            |           |
|------------------|------------|-----------|
| MSTRG. 13367. 1  | -1. 89179  | noncoding |
| MSTRG. 13367. 2  | -1. 97109  | noncoding |
| MSTRG. 13369. 2  | -0. 142629 | noncoding |
| MSTRG. 13369. 4  | 0. 24194   | coding    |
| MSTRG. 13369. 3  | 0. 359245  | coding    |
| MSTRG. 13378. 1  | -0. 635698 | noncoding |
| MSTRG. 13378. 2  | -0. 457427 | noncoding |
| MSTRG. 13381. 2  | -0. 794153 | noncoding |
| MSTRG. 13389. 1  | 2. 51634   | coding    |
| MSTRG. 13391. 6  | 1. 39602   | coding    |
| MSTRG. 13391. 3  | 0. 63515   | coding    |
| MSTRG. 13396. 1  | -1. 33072  | noncoding |
| MSTRG. 13397. 1  | 0. 368945  | coding    |
| MSTRG. 13398. 1  | -0. 002611 | noncoding |
| MSTRG. 13401. 1  | -0. 79706  | noncoding |
| MSTRG. 13409. 2  | 2. 92744   | coding    |
| MSTRG. 13410. 1  | -1. 74059  | noncoding |
| MSTRG. 13410. 2  | -1. 71717  | noncoding |
| MSTRG. 13409. 3  | 2. 74187   | coding    |
| MSTRG. 13409. 4  | 2. 84059   | coding    |
| MSTRG. 13409. 5  | 3. 19953   | coding    |
| MSTRG. 13409. 8  | 2. 56458   | coding    |
| MSTRG. 13409. 6  | 2. 67717   | coding    |
| MSTRG. 13409. 7  | 2. 72338   | coding    |
| MSTRG. 13409. 9  | 2. 51265   | coding    |
| MSTRG. 13411. 1  | -0. 158229 | noncoding |
| MSTRG. 13411. 4  | 2. 6643    | coding    |
| MSTRG. 13423. 1  | -1. 97244  | noncoding |
| MSTRG. 13425. 1  | 0. 933564  | coding    |
| MSTRG. 13427. 1  | 0. 810894  | coding    |
| MSTRG. 13427. 2  | 1. 90117   | coding    |
| MSTRG. 13427. 4  | 1. 99253   | coding    |
| MSTRG. 13427. 3  | 1. 50702   | coding    |
| MSTRG. 13427. 6  | 1. 64642   | coding    |
| MSTRG. 13427. 8  | 1. 72188   | coding    |
| MSTRG. 13427. 9  | 0. 088388  | coding    |
| MSTRG. 13427. 10 | 0. 413059  | coding    |
| MSTRG. 13427. 11 | -1. 32323  | noncoding |
| MSTRG. 13428. 1  | -0. 296902 | noncoding |
| MSTRG. 13428. 2  | -0. 072951 | noncoding |
| MSTRG. 13429. 1  | 1. 18349   | coding    |
| MSTRG. 13430. 1  | -0. 837632 | noncoding |
| MSTRG. 13431. 1  | 0. 607288  | coding    |
| MSTRG. 13431. 2  | -0. 754701 | noncoding |
| MSTRG. 13432. 1  | 0. 697134  | coding    |
| MSTRG. 13413. 2  | 0. 33803   | coding    |
| MSTRG. 13414. 1  | 0. 198486  | coding    |
| MSTRG. 13418. 1  | 0. 197134  | coding    |
| MSTRG. 13420. 1  | 1. 70613   | coding    |
| MSTRG. 13421. 2  | 1. 09998   | coding    |
| MSTRG. 13419. 1  | -1. 43602  | noncoding |
| MSTRG. 13419. 2  | -1. 33272  | noncoding |
| MSTRG. 13419. 3  | -1. 45538  | noncoding |
| MSTRG. 13433. 1  | -1. 02453  | noncoding |



|               |           |           |
|---------------|-----------|-----------|
| MSTRG.13437.2 | -0.091915 | noncoding |
| MSTRG.13440.1 | 0.037099  | coding    |
| MSTRG.13449.1 | -0.886386 | noncoding |
| MSTRG.13450.3 | 2.98693   | coding    |
| MSTRG.13450.2 | 2.89578   | coding    |
| MSTRG.13451.1 | -0.289867 | noncoding |
| MSTRG.13454.2 | 0.845609  | coding    |
| MSTRG.13456.1 | 0.241379  | coding    |
| MSTRG.13456.2 | -0.243467 | noncoding |
| MSTRG.13457.1 | -0.586893 | noncoding |
| MSTRG.13459.1 | -2.23534  | noncoding |
| MSTRG.13461.6 | 1.17396   | coding    |
| MSTRG.13461.5 | 2.71664   | coding    |
| MSTRG.13462.1 | -1.46638  | noncoding |
| MSTRG.13481.1 | -1.98993  | noncoding |
| MSTRG.13486.2 | 0.129124  | coding    |
| MSTRG.13492.1 | -0.679473 | noncoding |
| MSTRG.13506.1 | -0.821812 | noncoding |
| MSTRG.13506.2 | -0.285129 | noncoding |
| MSTRG.13506.3 | -0.842388 | noncoding |
| MSTRG.13506.4 | -0.97837  | noncoding |
| MSTRG.13510.1 | 1.47393   | coding    |
| MSTRG.13510.2 | 1.80169   | coding    |
| MSTRG.13510.3 | 1.94153   | coding    |
| MSTRG.13510.4 | 2.15021   | coding    |
| MSTRG.13510.5 | 2.08049   | coding    |
| MSTRG.13510.6 | 2.0594    | coding    |
| MSTRG.13497.2 | 1.78931   | coding    |
| MSTRG.13504.1 | -1.90489  | noncoding |
| MSTRG.13512.4 | 1.39709   | coding    |
| MSTRG.13512.6 | 1.1512    | coding    |
| MSTRG.13512.3 | 1.91213   | coding    |
| MSTRG.13512.7 | 1.56185   | coding    |
| MSTRG.13512.8 | 1.72798   | coding    |
| MSTRG.13512.9 | 1.73675   | coding    |
| MSTRG.13518.1 | 1.40888   | coding    |
| MSTRG.13518.3 | 0.40507   | coding    |
| MSTRG.13519.1 | 1.33252   | coding    |
| MSTRG.13520.4 | 1.41954   | coding    |
| MSTRG.13531.1 | -0.550872 | noncoding |
| MSTRG.13532.1 | 1.95838   | coding    |
| MSTRG.13532.3 | -0.992363 | noncoding |
| MSTRG.13532.6 | 2.1883    | coding    |
| MSTRG.13538.2 | 1.40541   | coding    |
| MSTRG.13540.4 | 0.010211  | coding    |
| MSTRG.13543.1 | 0.541687  | coding    |
| MSTRG.13554.1 | 0.319337  | coding    |
| MSTRG.13555.1 | -2.36444  | noncoding |
| MSTRG.13560.2 | 1.27208   | coding    |
| MSTRG.13560.3 | 1.65391   | coding    |
| MSTRG.13562.1 | -0.442443 | noncoding |
| MSTRG.13564.1 | 1.36696   | coding    |
| MSTRG.13564.2 | 1.58567   | coding    |
| MSTRG.13563.1 | -0.571993 | noncoding |

|                 |           |           |
|-----------------|-----------|-----------|
| MSTRG. 13563.2  | -0.831573 | noncoding |
| MSTRG. 13566.3  | 0.965168  | coding    |
| MSTRG. 13568.5  | 2.41216   | coding    |
| MSTRG. 13568.6  | 1.90718   | coding    |
| MSTRG. 13570.1  | 1.33115   | coding    |
| MSTRG. 13578.1  | 2.1108    | coding    |
| MSTRG. 13578.4  | 1.50868   | coding    |
| MSTRG. 13578.2  | 2.19987   | coding    |
| MSTRG. 13578.3  | 2.15339   | coding    |
| MSTRG. 13578.6  | 2.16476   | coding    |
| MSTRG. 13578.7  | 2.15796   | coding    |
| MSTRG. 13578.8  | 2.15047   | coding    |
| MSTRG. 13578.9  | 2.16679   | coding    |
| MSTRG. 13578.10 | 1.84504   | coding    |
| MSTRG. 13578.11 | 1.80231   | coding    |
| MSTRG. 13579.1  | -0.094996 | noncoding |
| MSTRG. 13580.1  | -2.39704  | noncoding |
| MSTRG. 13580.2  | -2.82322  | noncoding |
| MSTRG. 13578.12 | 2.35529   | coding    |
| MSTRG. 13578.13 | 1.62587   | coding    |
| MSTRG. 13578.14 | 1.62048   | coding    |
| MSTRG. 13578.15 | 2.40306   | coding    |
| MSTRG. 13578.16 | 0.571054  | coding    |
| MSTRG. 13581.1  | -2.08024  | noncoding |
| MSTRG. 13583.1  | -0.124536 | noncoding |
| MSTRG. 13584.2  | -0.68634  | noncoding |
| MSTRG. 13572.3  | 2.5192    | coding    |
| MSTRG. 13573.4  | 1.36487   | coding    |
| MSTRG. 13573.5  | 1.41456   | coding    |
| MSTRG. 13573.3  | 1.55252   | coding    |
| MSTRG. 13573.7  | 1.62008   | coding    |
| MSTRG. 13573.1  | 1.58694   | coding    |
| MSTRG. 13575.2  | 1.73738   | coding    |
| MSTRG. 13576.4  | 1.046     | coding    |
| MSTRG. 13576.3  | 1.7856    | coding    |
| MSTRG. 13576.5  | 2.06389   | coding    |
| MSTRG. 13576.6  | 1.9849    | coding    |
| MSTRG. 13576.7  | 2.04328   | coding    |
| MSTRG. 13576.8  | 1.86537   | coding    |
| MSTRG. 13576.9  | 1.54085   | coding    |
| MSTRG. 13577.2  | -1.11371  | noncoding |
| MSTRG. 13577.1  | -0.74135  | noncoding |
| MSTRG. 13577.5  | -0.606227 | noncoding |
| MSTRG. 13577.9  | -1.17034  | noncoding |
| MSTRG. 13577.10 | -0.846115 | noncoding |
| MSTRG. 13577.11 | -0.688982 | noncoding |
| MSTRG. 13577.6  | -0.693925 | noncoding |
| MSTRG. 13577.7  | -0.914408 | noncoding |
| MSTRG. 13577.8  | -0.818341 | noncoding |
| MSTRG. 13577.12 | -0.818755 | noncoding |
| MSTRG. 13589.3  | 0.795146  | coding    |
| MSTRG. 13589.4  | -1.20668  | noncoding |
| MSTRG. 13589.7  | 1.97813   | coding    |
| MSTRG. 13589.6  | 1.85021   | coding    |

|                |           |           |
|----------------|-----------|-----------|
| MSTRG.13591.1  | -1.06844  | noncoding |
| MSTRG.13593.5  | 2.32686   | coding    |
| MSTRG.13593.6  | 2.1262    | coding    |
| MSTRG.13593.7  | 2.16353   | coding    |
| MSTRG.13594.1  | -0.748474 | noncoding |
| MSTRG.13593.8  | 1.61121   | coding    |
| MSTRG.13595.2  | 1.119     | coding    |
| MSTRG.13595.1  | 1.01684   | coding    |
| MSTRG.13596.1  | -0.513728 | noncoding |
| MSTRG.13597.1  | -0.416976 | noncoding |
| MSTRG.13586.1  | 2.3025    | coding    |
| MSTRG.13586.2  | 2.29649   | coding    |
| MSTRG.13586.3  | 2.38732   | coding    |
| MSTRG.13587.1  | -1.01799  | noncoding |
| MSTRG.13598.2  | 0.742097  | coding    |
| MSTRG.13599.1  | 1.33496   | coding    |
| MSTRG.13599.2  | 1.12061   | coding    |
| MSTRG.13599.3  | 0.77476   | coding    |
| MSTRG.13599.4  | -0.057307 | noncoding |
| MSTRG.13602.1  | 0.544797  | coding    |
| MSTRG.13602.3  | 0.846808  | coding    |
| MSTRG.13602.5  | 0.871529  | coding    |
| MSTRG.13600.1  | 0.250876  | coding    |
| MSTRG.13603.1  | -1.64262  | noncoding |
| MSTRG.13603.2  | -0.602297 | noncoding |
| MSTRG.13608.3  | 0.894361  | coding    |
| MSTRG.13608.2  | 1.39659   | coding    |
| MSTRG.13608.6  | 0.937091  | coding    |
| MSTRG.13608.5  | 0.977903  | coding    |
| MSTRG.13605.1  | 1.58529   | coding    |
| MSTRG.13612.2  | -0.362461 | noncoding |
| MSTRG.13614.2  | 1.31226   | coding    |
| MSTRG.13618.3  | -0.216109 | noncoding |
| MSTRG.13618.1  | 0.39695   | coding    |
| MSTRG.13618.2  | 0.454057  | coding    |
| MSTRG.13627.2  | 1.97336   | coding    |
| MSTRG.13627.3  | 2.09388   | coding    |
| MSTRG.13630.1  | 1.70072   | coding    |
| MSTRG.13637.2  | 1.38684   | coding    |
| MSTRG.13657.4  | 0.067452  | coding    |
| MSTRG.13658.8  | 1.75978   | coding    |
| MSTRG.13666.4  | 1.27181   | coding    |
| MSTRG.13666.3  | 1.10803   | coding    |
| MSTRG.13666.5  | 1.43394   | coding    |
| MSTRG.13666.2  | 1.34886   | coding    |
| MSTRG.13667.1  | 2.08806   | coding    |
| MSTRG.13667.5  | 1.89497   | coding    |
| MSTRG.13667.6  | 2.04809   | coding    |
| MSTRG.13667.13 | 1.52116   | coding    |
| MSTRG.13667.12 | 1.46305   | coding    |
| MSTRG.13652.1  | 1.1687    | coding    |
| MSTRG.13652.2  | 1.55951   | coding    |
| MSTRG.13652.3  | -1.21052  | noncoding |
| MSTRG.13653.2  | 1.13517   | coding    |

|                |           |           |
|----------------|-----------|-----------|
| MSTRG.13653.3  | 0.424548  | coding    |
| MSTRG.13669.2  | 1.61943   | coding    |
| MSTRG.13671.1  | -0.11942  | noncoding |
| MSTRG.13672.6  | 1.00918   | coding    |
| MSTRG.13672.5  | 1.08493   | coding    |
| MSTRG.13672.4  | 1.00647   | coding    |
| MSTRG.13682.1  | -0.901034 | noncoding |
| MSTRG.13684.1  | -2.32488  | noncoding |
| MSTRG.13687.2  | -1.86619  | noncoding |
| MSTRG.13690.1  | 0.50194   | coding    |
| MSTRG.13690.2  | 0.469771  | coding    |
| MSTRG.13690.5  | 0.478251  | coding    |
| MSTRG.13690.3  | 0.749333  | coding    |
| MSTRG.13690.4  | 0.622907  | coding    |
| MSTRG.13711.1  | 3.05784   | coding    |
| MSTRG.13711.2  | 2.70696   | coding    |
| MSTRG.13711.3  | 3.00719   | coding    |
| MSTRG.13711.4  | 2.87527   | coding    |
| MSTRG.13711.5  | 3.08397   | coding    |
| MSTRG.13711.6  | 2.81368   | coding    |
| MSTRG.13713.1  | 1.45148   | coding    |
| MSTRG.13713.3  | 1.35768   | coding    |
| MSTRG.13713.2  | 1.40766   | coding    |
| MSTRG.13706.1  | 2.58924   | coding    |
| MSTRG.13706.18 | 1.35111   | coding    |
| MSTRG.13706.20 | 1.71899   | coding    |
| MSTRG.13706.17 | 1.68565   | coding    |
| MSTRG.13709.1  | 0.171149  | coding    |
| MSTRG.13706.22 | 1.34208   | coding    |
| MSTRG.13727.1  | 0.24751   | coding    |
| MSTRG.13727.2  | 1.05551   | coding    |
| MSTRG.13727.3  | 1.16998   | coding    |
| MSTRG.13727.4  | 1.12424   | coding    |
| MSTRG.13725.4  | 1.38426   | coding    |
| MSTRG.13725.6  | 1.428     | coding    |
| MSTRG.13725.7  | 1.56565   | coding    |
| MSTRG.13725.10 | -0.33817  | noncoding |
| MSTRG.13725.12 | 1.39348   | coding    |
| MSTRG.13725.13 | 1.46058   | coding    |
| MSTRG.13729.1  | -1.34927  | noncoding |
| MSTRG.13714.3  | 1.02452   | coding    |
| MSTRG.13717.1  | -1.73565  | noncoding |
| MSTRG.13723.1  | -0.190462 | noncoding |
| MSTRG.13738.1  | 1.53637   | coding    |
| MSTRG.13746.1  | -1.85609  | noncoding |
| MSTRG.13746.2  | -2.19796  | noncoding |
| MSTRG.13755.2  | -1.58792  | noncoding |
| MSTRG.13755.1  | 2.56965   | coding    |
| MSTRG.13755.3  | 2.53986   | coding    |
| MSTRG.13755.5  | 2.11986   | coding    |
| MSTRG.13755.6  | 2.52535   | coding    |
| MSTRG.13756.1  | 0.193381  | coding    |
| MSTRG.13758.2  | 1.27366   | coding    |
| MSTRG.13758.3  | 0.587608  | coding    |

|                 |            |           |
|-----------------|------------|-----------|
| MSTRG. 13758. 4 | -0. 726941 | noncoding |
| MSTRG. 13750. 1 | -2. 77959  | noncoding |
| MSTRG. 13760. 1 | 0. 348282  | coding    |
| MSTRG. 13760. 2 | -0. 284054 | noncoding |
| MSTRG. 13759. 2 | 0. 581957  | coding    |
| MSTRG. 13761. 2 | 3. 32114   | coding    |
| MSTRG. 13767. 1 | -0. 278601 | noncoding |
| MSTRG. 13768. 4 | 1. 09644   | coding    |
| MSTRG. 13768. 3 | 1. 07864   | coding    |
| MSTRG. 13768. 2 | 1. 05432   | coding    |
| MSTRG. 13768. 5 | 0. 71906   | coding    |
| MSTRG. 13769. 1 | 0. 174468  | coding    |
| MSTRG. 13768. 7 | 0. 771217  | coding    |
| MSTRG. 13765. 1 | 0. 572552  | coding    |
| MSTRG. 13765. 2 | 0. 660637  | coding    |
| MSTRG. 13764. 1 | 1. 8487    | coding    |
| MSTRG. 13780. 2 | -1. 29024  | noncoding |
| MSTRG. 13782. 1 | -0. 474239 | noncoding |
| MSTRG. 13780. 3 | -0. 379432 | noncoding |
| MSTRG. 13783. 1 | -0. 433181 | noncoding |
| MSTRG. 13784. 1 | -0. 238498 | noncoding |
| MSTRG. 13808. 1 | 0. 644715  | coding    |
| MSTRG. 13808. 3 | 0. 591319  | coding    |
| MSTRG. 13808. 4 | 0. 659265  | coding    |
| MSTRG. 13808. 2 | -0. 427222 | noncoding |
| MSTRG. 13808. 5 | 0. 815437  | coding    |
| MSTRG. 13809. 1 | 0. 387918  | coding    |
| MSTRG. 13811. 1 | -0. 580505 | noncoding |
| MSTRG. 13819. 3 | -0. 716007 | noncoding |
| MSTRG. 13820. 1 | -2. 34096  | noncoding |
| MSTRG. 13813. 1 | -3. 05068  | noncoding |
| MSTRG. 13822. 1 | -1. 68299  | noncoding |
| MSTRG. 13829. 1 | -2. 12851  | noncoding |
| MSTRG. 13831. 2 | 0. 740349  | coding    |
| MSTRG. 13831. 3 | 0. 964342  | coding    |
| MSTRG. 13832. 1 | -1. 33807  | noncoding |
| MSTRG. 13831. 4 | 1. 81747   | coding    |
| MSTRG. 13836. 1 | 2. 52309   | coding    |
| MSTRG. 13837. 1 | -0. 689885 | noncoding |
| MSTRG. 13838. 5 | 2. 76902   | coding    |
| MSTRG. 13838. 6 | 1. 87842   | coding    |
| MSTRG. 13834. 2 | 1. 34717   | coding    |
| MSTRG. 13844. 2 | 1. 15262   | coding    |
| MSTRG. 13844. 4 | 1. 76957   | coding    |
| MSTRG. 13845. 1 | -0. 04031  | noncoding |
| MSTRG. 13846. 1 | 1. 53628   | coding    |
| MSTRG. 13846. 2 | 0. 949349  | coding    |
| MSTRG. 13854. 3 | 1. 80606   | coding    |
| MSTRG. 13849. 2 | 1. 0266    | coding    |
| MSTRG. 13858. 2 | 2. 11241   | coding    |
| MSTRG. 13859. 1 | -2. 08085  | noncoding |
| MSTRG. 13862. 3 | -1. 08133  | noncoding |
| MSTRG. 13862. 2 | 0. 905146  | coding    |
| MSTRG. 13862. 4 | 1. 812     | coding    |

|                |           |           |
|----------------|-----------|-----------|
| MSTRG.13862.5  | 0.15159   | coding    |
| MSTRG.13867.1  | 0.882532  | coding    |
| MSTRG.13870.4  | 1.64847   | coding    |
| MSTRG.13871.3  | 1.79362   | coding    |
| MSTRG.13871.4  | 1.32196   | coding    |
| MSTRG.13877.3  | 1.51682   | coding    |
| MSTRG.13877.4  | 1.55      | coding    |
| MSTRG.13877.5  | 1.55968   | coding    |
| MSTRG.13884.4  | 2.11741   | coding    |
| MSTRG.13884.6  | 1.79232   | coding    |
| MSTRG.13884.5  | 1.75168   | coding    |
| MSTRG.13884.7  | 1.77441   | coding    |
| MSTRG.13884.8  | 1.95731   | coding    |
| MSTRG.13885.2  | 0.682648  | coding    |
| MSTRG.13885.3  | 0.78118   | coding    |
| MSTRG.13882.1  | 1.10735   | coding    |
| MSTRG.13881.1  | 0.361358  | coding    |
| MSTRG.13886.2  | 0.522967  | coding    |
| MSTRG.13886.5  | 0.887259  | coding    |
| MSTRG.13888.1  | -0.433336 | noncoding |
| MSTRG.13900.1  | -1.84092  | noncoding |
| MSTRG.13902.1  | 0.288244  | coding    |
| MSTRG.13903.3  | 1.17592   | coding    |
| MSTRG.13904.1  | -2.23563  | noncoding |
| MSTRG.13908.1  | 0.991782  | coding    |
| MSTRG.13908.2  | 0.890562  | coding    |
| MSTRG.13910.2  | 1.91115   | coding    |
| MSTRG.13910.5  | 1.17666   | coding    |
| MSTRG.13910.6  | 1.21482   | coding    |
| MSTRG.13913.3  | 1.56032   | coding    |
| MSTRG.13913.4  | -0.092586 | noncoding |
| MSTRG.13891.1  | -0.975451 | noncoding |
| MSTRG.13899.1  | -0.409074 | noncoding |
| MSTRG.13918.2  | 0.208967  | coding    |
| MSTRG.13918.3  | -0.471089 | noncoding |
| MSTRG.13919.2  | 1.78965   | coding    |
| MSTRG.13919.1  | 0.595874  | coding    |
| MSTRG.13940.1  | -0.195273 | noncoding |
| MSTRG.13941.2  | 1.02987   | coding    |
| MSTRG.13941.3  | 1.62108   | coding    |
| MSTRG.13942.1  | -0.16245  | noncoding |
| MSTRG.13942.2  | -0.207067 | noncoding |
| MSTRG.13942.3  | -1.23554  | noncoding |
| MSTRG.13942.4  | -1.63878  | noncoding |
| MSTRG.13942.5  | -1.98014  | noncoding |
| MSTRG.13942.6  | -2.0113   | noncoding |
| MSTRG.13942.7  | -1.95805  | noncoding |
| MSTRG.13942.10 | -2.01101  | noncoding |
| MSTRG.13942.11 | -1.92827  | noncoding |
| MSTRG.13942.12 | -1.91359  | noncoding |
| MSTRG.13942.8  | -1.93557  | noncoding |
| MSTRG.13942.9  | -1.86139  | noncoding |
| MSTRG.13942.13 | -1.97682  | noncoding |
| MSTRG.13942.17 | -1.9502   | noncoding |

|                  |            |           |
|------------------|------------|-----------|
| MSTRG. 13942. 18 | -2. 13555  | noncoding |
| MSTRG. 13942. 19 | -1. 93667  | noncoding |
| MSTRG. 13942. 20 | -1. 9751   | noncoding |
| MSTRG. 13942. 14 | -1. 9524   | noncoding |
| MSTRG. 13942. 15 | -1. 98146  | noncoding |
| MSTRG. 13942. 16 | -1. 94347  | noncoding |
| MSTRG. 13942. 21 | -1. 98044  | noncoding |
| MSTRG. 13942. 22 | -1. 86222  | noncoding |
| MSTRG. 13942. 25 | -1. 91269  | noncoding |
| MSTRG. 13942. 27 | -2. 01838  | noncoding |
| MSTRG. 13942. 28 | -1. 94525  | noncoding |
| MSTRG. 13942. 29 | -1. 98661  | noncoding |
| MSTRG. 13942. 30 | -2. 11926  | noncoding |
| MSTRG. 13942. 31 | -1. 99313  | noncoding |
| MSTRG. 13942. 23 | -1. 96208  | noncoding |
| MSTRG. 13942. 24 | -1. 93415  | noncoding |
| MSTRG. 13942. 26 | -1. 96561  | noncoding |
| MSTRG. 13942. 32 | -1. 96302  | noncoding |
| MSTRG. 13942. 33 | -2. 11035  | noncoding |
| MSTRG. 13927. 1  | 0. 186873  | coding    |
| MSTRG. 13928. 2  | 3. 53265   | coding    |
| MSTRG. 13944. 3  | 1. 74994   | coding    |
| MSTRG. 13945. 1  | -1. 90478  | noncoding |
| MSTRG. 13946. 3  | 1. 38359   | coding    |
| MSTRG. 13929. 2  | 1. 95594   | coding    |
| MSTRG. 13930. 2  | 0. 341914  | coding    |
| MSTRG. 13952. 1  | 1. 24265   | coding    |
| MSTRG. 13952. 2  | 0. 270612  | coding    |
| MSTRG. 13952. 3  | -0. 019954 | noncoding |
| MSTRG. 13955. 1  | -1. 47466  | noncoding |
| MSTRG. 13962. 2  | -1. 24449  | noncoding |
| MSTRG. 13964. 1  | -1. 86665  | noncoding |
| MSTRG. 13965. 1  | -1. 98911  | noncoding |
| MSTRG. 13969. 2  | 0. 032684  | coding    |
| MSTRG. 13971. 1  | -1. 65146  | noncoding |
| MSTRG. 13981. 1  | -0. 891072 | noncoding |
| MSTRG. 13981. 2  | -0. 880772 | noncoding |
| MSTRG. 13982. 1  | 0. 215292  | coding    |
| MSTRG. 13983. 1  | -1. 4307   | noncoding |
| MSTRG. 13984. 1  | 1. 97998   | coding    |
| MSTRG. 13984. 3  | 1. 76847   | coding    |
| MSTRG. 13984. 4  | 1. 60734   | coding    |
| MSTRG. 13986. 1  | 0. 19292   | coding    |
| MSTRG. 13980. 2  | 1. 15851   | coding    |
| MSTRG. 14009. 1  | 2. 49788   | coding    |
| MSTRG. 14009. 2  | 2. 29475   | coding    |
| MSTRG. 14009. 3  | 2. 42127   | coding    |
| MSTRG. 14009. 4  | 2. 51714   | coding    |
| MSTRG. 14010. 7  | 0. 277556  | coding    |
| MSTRG. 14010. 6  | 0. 47764   | coding    |
| MSTRG. 14010. 8  | 0. 438319  | coding    |
| MSTRG. 14010. 9  | -0. 599357 | noncoding |
| MSTRG. 13999. 1  | -1. 45816  | noncoding |
| MSTRG. 14003. 1  | -0. 44106  | noncoding |

|                |           |           |
|----------------|-----------|-----------|
| MSTRG.14003.4  | -1.55676  | noncoding |
| MSTRG.14001.2  | 1.97917   | coding    |
| MSTRG.14014.1  | -2.12599  | noncoding |
| MSTRG.14034.2  | 0.36504   | coding    |
| MSTRG.14035.1  | 0.229977  | coding    |
| MSTRG.14036.1  | 0.583706  | coding    |
| MSTRG.14037.1  | 0.036995  | coding    |
| MSTRG.14036.2  | 0.767331  | coding    |
| MSTRG.14038.1  | 0.261646  | coding    |
| MSTRG.14038.2  | 0.188471  | coding    |
| MSTRG.14039.1  | 0.389039  | coding    |
| MSTRG.14039.2  | 0.303878  | coding    |
| MSTRG.14041.1  | -0.162613 | noncoding |
| MSTRG.14034.3  | 1.41607   | coding    |
| MSTRG.14034.5  | 0.793513  | coding    |
| MSTRG.14034.6  | 1.98523   | coding    |
| MSTRG.14043.1  | -1.55524  | noncoding |
| MSTRG.14026.1  | 0.435045  | coding    |
| MSTRG.14029.2  | -0.577019 | noncoding |
| MSTRG.14030.1  | -1.20216  | noncoding |
| MSTRG.14059.4  | 0.799232  | coding    |
| MSTRG.14059.3  | 0.797406  | coding    |
| MSTRG.14059.5  | 0.675406  | coding    |
| MSTRG.14059.6  | 0.66488   | coding    |
| MSTRG.14060.2  | -2.43248  | noncoding |
| MSTRG.14063.1  | -1.45896  | noncoding |
| MSTRG.14066.3  | 2.59074   | coding    |
| MSTRG.14047.1  | -0.859822 | noncoding |
| MSTRG.14050.4  | 1.8591    | coding    |
| MSTRG.14069.1  | 1.25132   | coding    |
| MSTRG.14069.2  | 0.001489  | coding    |
| MSTRG.14075.1  | 1.5564    | coding    |
| MSTRG.14075.6  | 0.958191  | coding    |
| MSTRG.14076.1  | -0.310667 | noncoding |
| MSTRG.14077.1  | 0.927469  | coding    |
| MSTRG.14077.2  | 0.712531  | coding    |
| MSTRG.14079.1  | -1.27915  | noncoding |
| MSTRG.14079.2  | -2.03207  | noncoding |
| MSTRG.14081.1  | -0.614618 | noncoding |
| MSTRG.14082.1  | -2.36917  | noncoding |
| MSTRG.14083.1  | 0.855616  | coding    |
| MSTRG.14084.1  | 0.569555  | coding    |
| MSTRG.14085.1  | 1.97114   | coding    |
| MSTRG.14093.10 | 1.66771   | coding    |
| MSTRG.14093.11 | 1.27455   | coding    |
| MSTRG.14093.4  | 1.19678   | coding    |
| MSTRG.14093.5  | 1.87907   | coding    |
| MSTRG.14093.6  | 1.34706   | coding    |
| MSTRG.14093.7  | 1.30523   | coding    |
| MSTRG.14093.9  | 1.21315   | coding    |
| MSTRG.14093.12 | 0.304992  | coding    |
| MSTRG.14094.1  | 0.869713  | coding    |
| MSTRG.14095.1  | -0.467692 | noncoding |
| MSTRG.14099.1  | 0.552485  | coding    |



|                 |           |           |
|-----------------|-----------|-----------|
| MSTRG. 14100.2  | 0.294924  | coding    |
| MSTRG. 14089.2  | 1.40726   | coding    |
| MSTRG. 14109.1  | -2.02802  | noncoding |
| MSTRG. 14115.3  | 1.95571   | coding    |
| MSTRG. 14126.1  | -2.44803  | noncoding |
| MSTRG. 14127.1  | 0.290701  | coding    |
| MSTRG. 14130.1  | -1.16305  | noncoding |
| MSTRG. 14141.6  | 1.61779   | coding    |
| MSTRG. 14141.9  | 1.66379   | coding    |
| MSTRG. 14141.7  | 1.55789   | coding    |
| MSTRG. 14141.11 | -0.343797 | noncoding |
| MSTRG. 14142.3  | 1.40483   | coding    |
| MSTRG. 14142.4  | 2.23597   | coding    |
| MSTRG. 14143.1  | -1.59904  | noncoding |
| MSTRG. 14144.2  | 0.238825  | coding    |
| MSTRG. 14147.1  | -0.08852  | noncoding |
| MSTRG. 14147.2  | 0.657497  | coding    |
| MSTRG. 14153.2  | 0.448455  | coding    |
| MSTRG. 14153.3  | 0.405453  | coding    |
| MSTRG. 14157.1  | -0.085801 | noncoding |
| MSTRG. 14157.2  | 0.054141  | coding    |
| MSTRG. 14157.4  | 0.0628    | coding    |
| MSTRG. 14157.3  | -0.10574  | noncoding |
| MSTRG. 14157.5  | -0.145818 | noncoding |
| MSTRG. 14167.1  | -1.42631  | noncoding |
| MSTRG. 14172.1  | -2.40402  | noncoding |
| MSTRG. 14177.1  | -2.09674  | noncoding |
| MSTRG. 14182.3  | 1.22321   | coding    |
| MSTRG. 14183.4  | 1.23646   | coding    |
| MSTRG. 14183.6  | -0.364821 | noncoding |
| MSTRG. 14183.7  | -0.381902 | noncoding |
| MSTRG. 14183.5  | 0.75515   | coding    |
| MSTRG. 14183.1  | 0.75642   | coding    |
| MSTRG. 14183.8  | 0.645729  | coding    |
| MSTRG. 14186.2  | 1.16437   | coding    |
| MSTRG. 14190.2  | 1.87438   | coding    |
| MSTRG. 14191.1  | -1.23516  | noncoding |
| MSTRG. 14192.1  | -1.97284  | noncoding |
| MSTRG. 14193.1  | 0.759739  | coding    |
| MSTRG. 14193.2  | 0.402528  | coding    |
| MSTRG. 14193.3  | 0.914058  | coding    |
| MSTRG. 14194.3  | 2.23419   | coding    |
| MSTRG. 14194.2  | 2.27096   | coding    |
| MSTRG. 14189.2  | 1.53718   | coding    |
| MSTRG. 14189.3  | 1.73137   | coding    |
| MSTRG. 14198.1  | 0.315616  | coding    |
| MSTRG. 14198.2  | 0.140782  | coding    |
| MSTRG. 14198.3  | -0.194623 | noncoding |
| MSTRG. 14198.4  | -0.246317 | noncoding |
| MSTRG. 14198.5  | -0.810215 | noncoding |
| MSTRG. 14199.3  | 0.549748  | coding    |
| MSTRG. 14201.4  | 0.301311  | coding    |
| MSTRG. 14201.5  | 0.337026  | coding    |
| MSTRG. 14201.3  | 0.579355  | coding    |

|                |           |           |
|----------------|-----------|-----------|
| MSTRG.14201.8  | 0.904182  | coding    |
| MSTRG.14201.7  | 0.924188  | coding    |
| MSTRG.14213.1  | -2.35068  | noncoding |
| MSTRG.14219.1  | 2.14133   | coding    |
| MSTRG.14220.2  | 1.93504   | coding    |
| MSTRG.14223.1  | 1.30148   | coding    |
| MSTRG.14227.1  | -1.81362  | noncoding |
| MSTRG.14221.1  | -0.242296 | noncoding |
| MSTRG.14221.2  | -0.199389 | noncoding |
| MSTRG.14221.3  | 0.014209  | coding    |
| MSTRG.14233.2  | -1.53691  | noncoding |
| MSTRG.14233.3  | -1.62978  | noncoding |
| MSTRG.14233.1  | -0.461331 | noncoding |
| MSTRG.14233.4  | -1.85548  | noncoding |
| MSTRG.14235.1  | -1.09989  | noncoding |
| MSTRG.14251.3  | -0.148875 | noncoding |
| MSTRG.14251.4  | -0.29468  | noncoding |
| MSTRG.14251.5  | 0.404224  | coding    |
| MSTRG.14257.1  | 0.858626  | coding    |
| MSTRG.14249.6  | -0.23524  | noncoding |
| MSTRG.14249.7  | 0.625403  | coding    |
| MSTRG.14249.5  | 0.789947  | coding    |
| MSTRG.14249.8  | 0.719934  | coding    |
| MSTRG.14248.2  | 0.357692  | coding    |
| MSTRG.14266.3  | 2.28366   | coding    |
| MSTRG.14269.2  | 0.93128   | coding    |
| MSTRG.14269.4  | -0.033022 | noncoding |
| MSTRG.14272.2  | 2.15838   | coding    |
| MSTRG.14277.1  | 0.437647  | coding    |
| MSTRG.14278.1  | -0.930868 | noncoding |
| MSTRG.14287.6  | 1.68894   | coding    |
| MSTRG.14287.7  | 1.81237   | coding    |
| MSTRG.14287.8  | 1.8316    | coding    |
| MSTRG.14287.10 | 1.97941   | coding    |
| MSTRG.14287.11 | 1.93794   | coding    |
| MSTRG.14287.12 | 1.94076   | coding    |
| MSTRG.14287.9  | 2.0522    | coding    |
| MSTRG.14287.13 | 1.96436   | coding    |
| MSTRG.14288.1  | 0.776161  | coding    |
| MSTRG.14287.14 | 0.691489  | coding    |
| MSTRG.14280.1  | -1.23754  | noncoding |
| MSTRG.14281.1  | -1.32331  | noncoding |
| MSTRG.14281.3  | 0.074404  | coding    |
| MSTRG.14281.4  | -1.43777  | noncoding |
| MSTRG.14281.5  | 0.720339  | coding    |
| MSTRG.14282.1  | 0.613829  | coding    |
| MSTRG.14282.2  | -0.076388 | noncoding |
| MSTRG.14283.1  | 0.336482  | coding    |
| MSTRG.14284.1  | -0.484273 | noncoding |
| MSTRG.14285.1  | -1.57044  | noncoding |
| MSTRG.14290.1  | 0.654321  | coding    |
| MSTRG.14290.4  | 0.885446  | coding    |
| MSTRG.14290.5  | 2.12119   | coding    |
| MSTRG.14290.6  | 1.86818   | coding    |

|                |           |           |
|----------------|-----------|-----------|
| MSTRG.14290.3  | 1.9476    | coding    |
| MSTRG.14290.7  | 1.85583   | coding    |
| MSTRG.14291.1  | -0.940311 | noncoding |
| MSTRG.14304.1  | -1.53284  | noncoding |
| MSTRG.14304.2  | -1.61767  | noncoding |
| MSTRG.14308.1  | 0.551398  | coding    |
| MSTRG.14295.1  | -0.230168 | noncoding |
| MSTRG.14296.2  | 1.51934   | coding    |
| MSTRG.14297.1  | -2.13     | noncoding |
| MSTRG.14298.1  | -1.99465  | noncoding |
| MSTRG.14310.2  | 1.25907   | coding    |
| MSTRG.14311.1  | 1.4184    | coding    |
| MSTRG.14311.2  | 0.617824  | coding    |
| MSTRG.14311.3  | -0.20166  | noncoding |
| MSTRG.14311.4  | -0.366571 | noncoding |
| MSTRG.14313.2  | 1.22989   | coding    |
| MSTRG.14317.2  | -0.706958 | noncoding |
| MSTRG.14318.2  | 0.315927  | coding    |
| MSTRG.14319.1  | 2.07233   | coding    |
| MSTRG.14319.2  | 2.24447   | coding    |
| MSTRG.14319.4  | 2.13916   | coding    |
| MSTRG.14319.3  | 2.37074   | coding    |
| MSTRG.14319.12 | 1.92245   | coding    |
| MSTRG.14319.13 | 1.44578   | coding    |
| MSTRG.14319.14 | 1.32415   | coding    |
| MSTRG.14320.1  | -0.044024 | noncoding |
| MSTRG.14324.1  | 0.304016  | coding    |
| MSTRG.14325.1  | 2.15694   | coding    |
| MSTRG.14325.2  | 2.43265   | coding    |
| MSTRG.14326.1  | -2.48062  | noncoding |
| MSTRG.14330.1  | -0.00501  | noncoding |
| MSTRG.14331.1  | 2.49049   | coding    |
| MSTRG.14331.3  | 0.996442  | coding    |
| MSTRG.14334.2  | 1.03235   | coding    |
| MSTRG.14349.2  | 1.22189   | coding    |
| MSTRG.14350.1  | 1.46494   | coding    |
| MSTRG.14354.1  | -0.380976 | noncoding |
| MSTRG.14343.1  | -0.302937 | noncoding |
| MSTRG.14359.2  | 2.05259   | coding    |
| MSTRG.14360.2  | 1.26967   | coding    |
| MSTRG.14367.4  | 1.819     | coding    |
| MSTRG.14367.5  | 1.64201   | coding    |
| MSTRG.14368.1  | -1.73835  | noncoding |
| MSTRG.14369.1  | -0.432628 | noncoding |
| MSTRG.14401.1  | -0.969981 | noncoding |
| MSTRG.14409.7  | 2.16951   | coding    |
| MSTRG.14409.8  | 2.16397   | coding    |
| MSTRG.14409.9  | 2.15406   | coding    |
| MSTRG.14409.10 | -0.194094 | noncoding |
| MSTRG.14409.11 | 2.05437   | coding    |
| MSTRG.14409.12 | 2.11159   | coding    |
| MSTRG.14409.13 | 2.121     | coding    |
| MSTRG.14409.14 | 2.22173   | coding    |
| MSTRG.14411.3  | 1.0234    | coding    |

|                 |            |           |
|-----------------|------------|-----------|
| MSTRG. 14411. 4 | 0. 902467  | coding    |
| MSTRG. 14411. 5 | 0. 957937  | coding    |
| MSTRG. 14411. 6 | 0. 980728  | coding    |
| MSTRG. 14412. 1 | 1. 72489   | coding    |
| MSTRG. 14376. 1 | 1. 5268    | coding    |
| MSTRG. 14376. 2 | 1. 28476   | coding    |
| MSTRG. 14379. 1 | -1. 50805  | noncoding |
| MSTRG. 14376. 3 | -1. 70636  | noncoding |
| MSTRG. 14379. 2 | -1. 31197  | noncoding |
| MSTRG. 14380. 1 | 1. 24369   | coding    |
| MSTRG. 14380. 2 | 0. 481041  | coding    |
| MSTRG. 14371. 4 | 0. 363498  | coding    |
| MSTRG. 14385. 1 | -0. 636216 | noncoding |
| MSTRG. 14386. 1 | -2. 36862  | noncoding |
| MSTRG. 14387. 1 | -2. 85763  | noncoding |
| MSTRG. 14395. 1 | 1. 10298   | coding    |
| MSTRG. 14398. 1 | 0. 386174  | coding    |
| MSTRG. 14399. 1 | 0. 312987  | coding    |
| MSTRG. 14419. 1 | -1. 20272  | noncoding |
| MSTRG. 14421. 1 | -0. 553365 | noncoding |
| MSTRG. 14422. 1 | -0. 639399 | noncoding |
| MSTRG. 14424. 1 | 0. 152392  | coding    |
| MSTRG. 14424. 2 | -0. 175387 | noncoding |
| MSTRG. 14426. 2 | -0. 988834 | noncoding |
| MSTRG. 14426. 3 | 0. 09562   | coding    |
| MSTRG. 14427. 3 | 1. 78037   | coding    |
| MSTRG. 14427. 4 | 1. 97424   | coding    |
| MSTRG. 14428. 1 | 1. 37002   | coding    |
| MSTRG. 14429. 1 | -1. 21419  | noncoding |
| MSTRG. 14414. 1 | -0. 190034 | noncoding |
| MSTRG. 14434. 1 | 2. 64141   | coding    |
| MSTRG. 14435. 1 | 0. 061916  | coding    |
| MSTRG. 14436. 2 | -1. 54894  | noncoding |
| MSTRG. 14437. 1 | 1. 20754   | coding    |
| MSTRG. 14436. 4 | 1. 02201   | coding    |
| MSTRG. 14437. 5 | 1. 45953   | coding    |
| MSTRG. 14439. 2 | 0. 710078  | coding    |
| MSTRG. 14439. 3 | 0. 385321  | coding    |
| MSTRG. 14454. 3 | 2. 36242   | coding    |
| MSTRG. 14455. 1 | 0. 813099  | coding    |
| MSTRG. 14461. 1 | 0. 111403  | coding    |
| MSTRG. 14440. 1 | -1. 77872  | noncoding |
| MSTRG. 14441. 2 | 2. 21643   | coding    |
| MSTRG. 14442. 1 | 2. 05194   | coding    |
| MSTRG. 14442. 3 | 2. 85228   | coding    |
| MSTRG. 14442. 4 | 2. 82296   | coding    |
| MSTRG. 14442. 5 | 2. 96853   | coding    |
| MSTRG. 14442. 6 | 2. 88094   | coding    |
| MSTRG. 14445. 2 | -2. 24591  | noncoding |
| MSTRG. 14445. 1 | -1. 06935  | noncoding |
| MSTRG. 14445. 3 | -2. 09385  | noncoding |
| MSTRG. 14446. 1 | -0. 477994 | noncoding |
| MSTRG. 14447. 1 | 1. 94201   | coding    |
| MSTRG. 14448. 1 | 0. 734544  | coding    |

|                 |           |           |
|-----------------|-----------|-----------|
| MSTRG. 14453.2  | 1.17559   | coding    |
| MSTRG. 14453.4  | 1.35854   | coding    |
| MSTRG. 14453.5  | 1.098     | coding    |
| MSTRG. 14486.1  | 0.317168  | coding    |
| MSTRG. 14486.3  | 0.257791  | coding    |
| MSTRG. 14486.4  | 0.260877  | coding    |
| MSTRG. 14487.1  | 1.26336   | coding    |
| MSTRG. 14487.2  | 1.37032   | coding    |
| MSTRG. 14488.3  | 0.115339  | coding    |
| MSTRG. 14488.5  | 1.08539   | coding    |
| MSTRG. 14491.3  | 2.11627   | coding    |
| MSTRG. 14491.5  | 0.496306  | coding    |
| MSTRG. 14491.8  | 0.587315  | coding    |
| MSTRG. 14491.7  | 1.18095   | coding    |
| MSTRG. 14491.10 | 0.26025   | coding    |
| MSTRG. 14491.6  | 0.186889  | coding    |
| MSTRG. 14491.4  | 2.06762   | coding    |
| MSTRG. 14491.11 | -0.13694  | noncoding |
| MSTRG. 14489.1  | 1.57071   | coding    |
| MSTRG. 14489.3  | 1.34525   | coding    |
| MSTRG. 14489.4  | 1.2804    | coding    |
| MSTRG. 14492.2  | 0.93484   | coding    |
| MSTRG. 14492.3  | 0.774535  | coding    |
| MSTRG. 14492.4  | 0.790961  | coding    |
| MSTRG. 14493.1  | 0.84166   | coding    |
| MSTRG. 14492.6  | -1.83446  | noncoding |
| MSTRG. 14492.5  | 0.159118  | coding    |
| MSTRG. 14495.1  | 0.030535  | coding    |
| MSTRG. 14508.5  | 0.43629   | coding    |
| MSTRG. 14508.7  | 1.56828   | coding    |
| MSTRG. 14508.8  | 2.13407   | coding    |
| MSTRG. 14508.4  | 2.14773   | coding    |
| MSTRG. 14508.6  | 3.11253   | coding    |
| MSTRG. 14508.9  | 0.827355  | coding    |
| MSTRG. 14509.1  | 0.399392  | coding    |
| MSTRG. 14508.10 | 2.46537   | coding    |
| MSTRG. 14513.1  | -0.064696 | noncoding |
| MSTRG. 14512.3  | 2.16738   | coding    |
| MSTRG. 14512.4  | 1.85576   | coding    |
| MSTRG. 14515.1  | 0.921073  | coding    |
| MSTRG. 14515.2  | -1.25103  | noncoding |
| MSTRG. 14515.3  | -0.756839 | noncoding |
| MSTRG. 14516.1  | -2.35043  | noncoding |
| MSTRG. 14528.1  | 0.116463  | coding    |
| MSTRG. 14528.3  | -0.381015 | noncoding |
| MSTRG. 14528.5  | -1.16043  | noncoding |
| MSTRG. 14529.1  | 0.499052  | coding    |
| MSTRG. 14529.2  | 0.093391  | coding    |
| MSTRG. 14530.1  | 1.13661   | coding    |
| MSTRG. 14529.3  | 0.234952  | coding    |
| MSTRG. 14529.4  | -0.187294 | noncoding |
| MSTRG. 14529.5  | -2.19518  | noncoding |
| MSTRG. 14531.1  | 0.011037  | coding    |
| MSTRG. 14531.2  | -2.92191  | noncoding |

|                  |            |           |
|------------------|------------|-----------|
| MSTRG. 14533. 1  | -0. 86051  | noncoding |
| MSTRG. 14534. 1  | 0. 055326  | coding    |
| MSTRG. 14534. 2  | 0. 43255   | coding    |
| MSTRG. 14534. 3  | -1. 03468  | noncoding |
| MSTRG. 14534. 4  | -0. 428096 | noncoding |
| MSTRG. 14533. 2  | -0. 199402 | noncoding |
| MSTRG. 14535. 1  | -1. 86377  | noncoding |
| MSTRG. 14517. 3  | 1. 59771   | coding    |
| MSTRG. 14517. 4  | 0. 671623  | coding    |
| MSTRG. 14518. 1  | -1. 00537  | noncoding |
| MSTRG. 14519. 1  | -2. 05839  | noncoding |
| MSTRG. 14526. 3  | 2. 03054   | coding    |
| MSTRG. 14536. 1  | -0. 166036 | noncoding |
| MSTRG. 14538. 2  | 0. 48482   | coding    |
| MSTRG. 14538. 3  | 0. 636758  | coding    |
| MSTRG. 14538. 4  | 0. 665874  | coding    |
| MSTRG. 14538. 5  | 0. 946569  | coding    |
| MSTRG. 14539. 5  | 1. 01968   | coding    |
| MSTRG. 14539. 7  | 1. 20821   | coding    |
| MSTRG. 14540. 1  | 0. 925815  | coding    |
| MSTRG. 14540. 11 | 1. 18316   | coding    |
| MSTRG. 14540. 9  | 0. 342232  | coding    |
| MSTRG. 14540. 12 | 0. 790514  | coding    |
| MSTRG. 14540. 13 | 0. 98651   | coding    |
| MSTRG. 14540. 10 | 1. 1754    | coding    |
| MSTRG. 14540. 4  | 1. 17812   | coding    |
| MSTRG. 14540. 3  | 0. 843065  | coding    |
| MSTRG. 14540. 6  | 0. 856946  | coding    |
| MSTRG. 14540. 7  | 0. 351981  | coding    |
| MSTRG. 14540. 2  | 1. 18116   | coding    |
| MSTRG. 14540. 8  | 1. 17959   | coding    |
| MSTRG. 14540. 14 | 0. 24674   | coding    |
| MSTRG. 14541. 1  | 0. 119593  | coding    |
| MSTRG. 14543. 5  | 1. 86875   | coding    |
| MSTRG. 14544. 1  | 0. 413362  | coding    |
| MSTRG. 14553. 1  | 0. 906924  | coding    |
| MSTRG. 14553. 2  | 1. 79214   | coding    |
| MSTRG. 14553. 3  | 1. 1572    | coding    |
| MSTRG. 14558. 2  | 1. 10591   | coding    |
| MSTRG. 14560. 3  | 0. 839152  | coding    |
| MSTRG. 14560. 7  | -0. 107582 | noncoding |
| MSTRG. 14563. 6  | 0. 766506  | coding    |
| MSTRG. 14563. 4  | 0. 640244  | coding    |
| MSTRG. 14563. 5  | 0. 63816   | coding    |
| MSTRG. 14564. 6  | -0. 665714 | noncoding |
| MSTRG. 14564. 4  | 1. 42765   | coding    |
| MSTRG. 14564. 5  | 1. 14246   | coding    |
| MSTRG. 14564. 2  | 1. 51398   | coding    |
| MSTRG. 14565. 1  | 1. 3664    | coding    |
| MSTRG. 14564. 7  | -2. 13148  | noncoding |
| MSTRG. 14564. 8  | 1. 00561   | coding    |
| MSTRG. 14565. 2  | 2. 06402   | coding    |
| MSTRG. 14566. 4  | -0. 259019 | noncoding |
| MSTRG. 14567. 1  | 0. 165558  | coding    |

|                |           |           |
|----------------|-----------|-----------|
| MSTRG.14568.1  | 0.302182  | coding    |
| MSTRG.14569.1  | -1.89417  | noncoding |
| MSTRG.14556.2  | 0.031974  | coding    |
| MSTRG.14557.1  | 1.94173   | coding    |
| MSTRG.14574.4  | 1.21965   | coding    |
| MSTRG.14576.2  | 0.139944  | coding    |
| MSTRG.14579.4  | 2.49072   | coding    |
| MSTRG.14580.1  | 0.331114  | coding    |
| MSTRG.14580.3  | 0.003024  | coding    |
| MSTRG.14570.2  | 1.24601   | coding    |
| MSTRG.14573.2  | -0.064949 | noncoding |
| MSTRG.14583.1  | 1.83607   | coding    |
| MSTRG.14593.1  | 0.824889  | coding    |
| MSTRG.14593.3  | 1.2256    | coding    |
| MSTRG.14593.4  | 0.580432  | coding    |
| MSTRG.14593.5  | 0.103356  | coding    |
| MSTRG.14593.7  | -0.126763 | noncoding |
| MSTRG.14600.1  | 1.38259   | coding    |
| MSTRG.14600.8  | 1.29725   | coding    |
| MSTRG.14600.11 | 1.53221   | coding    |
| MSTRG.14600.5  | 1.4703    | coding    |
| MSTRG.14600.6  | 1.5883    | coding    |
| MSTRG.14600.7  | 1.48818   | coding    |
| MSTRG.14600.2  | 1.45348   | coding    |
| MSTRG.14600.3  | 1.49102   | coding    |
| MSTRG.14600.9  | 1.52698   | coding    |
| MSTRG.14600.12 | 0.402327  | coding    |
| MSTRG.14601.1  | -2.20241  | noncoding |
| MSTRG.14600.13 | 0.26399   | coding    |
| MSTRG.14600.14 | -0.433859 | noncoding |
| MSTRG.14603.2  | 0.117583  | coding    |
| MSTRG.14605.3  | -0.918473 | noncoding |
| MSTRG.14605.4  | 0.106259  | coding    |
| MSTRG.14605.2  | 1.08231   | coding    |
| MSTRG.14605.5  | -0.024082 | noncoding |
| MSTRG.14591.4  | -1.07943  | noncoding |
| MSTRG.14591.5  | 0.267866  | coding    |
| MSTRG.14589.1  | -0.65979  | noncoding |
| MSTRG.14590.1  | -1.76283  | noncoding |
| MSTRG.14592.1  | 1.72211   | coding    |
| MSTRG.14592.2  | 1.7029    | coding    |
| MSTRG.14608.1  | 0.824853  | coding    |
| MSTRG.14608.2  | 0.774304  | coding    |
| MSTRG.14608.5  | 1.54667   | coding    |
| MSTRG.14608.4  | 1.36685   | coding    |
| MSTRG.14610.1  | -0.636299 | noncoding |
| MSTRG.14608.7  | -0.349729 | noncoding |
| MSTRG.14612.1  | -0.618678 | noncoding |
| MSTRG.14615.1  | 0.946732  | coding    |
| MSTRG.14615.2  | 0.594923  | coding    |
| MSTRG.14615.3  | 1.38243   | coding    |
| MSTRG.14615.5  | 0.391304  | coding    |
| MSTRG.14619.3  | 1.25545   | coding    |
| MSTRG.14619.2  | 1.6202    | coding    |

|               |           |           |
|---------------|-----------|-----------|
| MSTRG.14619.4 | 1.24618   | coding    |
| MSTRG.14620.1 | 0.671939  | coding    |
| MSTRG.14620.2 | 0.735446  | coding    |
| MSTRG.14620.3 | 0.397617  | coding    |
| MSTRG.14620.4 | 0.736314  | coding    |
| MSTRG.14620.5 | -1.92815  | noncoding |
| MSTRG.14620.6 | 0.092812  | coding    |
| MSTRG.14616.3 | 0.853079  | coding    |
| MSTRG.14624.4 | 0.483952  | coding    |
| MSTRG.14625.3 | 0.162668  | coding    |
| MSTRG.14629.1 | 1.74639   | coding    |
| MSTRG.14629.3 | 1.49015   | coding    |
| MSTRG.14626.2 | 1.23603   | coding    |
| MSTRG.14630.1 | -1.23328  | noncoding |
| MSTRG.14633.1 | -2.19754  | noncoding |
| MSTRG.14638.1 | -2.025    | noncoding |
| MSTRG.14645.1 | 2.10241   | coding    |
| MSTRG.14646.1 | -0.896712 | noncoding |
| MSTRG.14648.2 | -1.28669  | noncoding |
| MSTRG.14648.3 | 2.08709   | coding    |
| MSTRG.14651.1 | 2.40765   | coding    |
| MSTRG.14651.3 | 2.83134   | coding    |
| MSTRG.14651.4 | 2.58109   | coding    |
| MSTRG.14647.1 | -2.21121  | noncoding |
| MSTRG.14658.1 | -0.753692 | noncoding |
| MSTRG.14656.1 | -1.8014   | noncoding |
| MSTRG.14672.1 | -1.23406  | noncoding |
| MSTRG.14673.1 | -2.06975  | noncoding |
| MSTRG.14675.2 | 1.64886   | coding    |
| MSTRG.14678.1 | -1.56666  | noncoding |
| MSTRG.14686.1 | -2.18301  | noncoding |
| MSTRG.14687.1 | 0.016372  | coding    |
| MSTRG.14687.2 | -0.763647 | noncoding |
| MSTRG.14688.2 | 1.98945   | coding    |
| MSTRG.14692.1 | -1.70182  | noncoding |
| MSTRG.14692.2 | -1.60971  | noncoding |
| MSTRG.14695.1 | -0.760036 | noncoding |
| MSTRG.14696.5 | 0.298622  | coding    |
| MSTRG.14696.6 | -0.025294 | noncoding |
| MSTRG.14697.1 | -0.243139 | noncoding |
| MSTRG.14699.2 | 0.019418  | coding    |
| MSTRG.14699.1 | 0.199584  | coding    |
| MSTRG.14699.3 | 0.062176  | coding    |
| MSTRG.14699.4 | 0.056028  | coding    |
| MSTRG.14699.5 | 0.120742  | coding    |
| MSTRG.14699.6 | -0.16798  | noncoding |
| MSTRG.14701.8 | 0.074636  | coding    |
| MSTRG.14701.4 | 0.854864  | coding    |
| MSTRG.14701.5 | 0.727321  | coding    |
| MSTRG.14701.7 | 0.8509    | coding    |
| MSTRG.14701.9 | 0.790859  | coding    |
| MSTRG.14702.1 | 2.35434   | coding    |
| MSTRG.14703.1 | 0.92038   | coding    |
| MSTRG.14707.5 | 0.892198  | coding    |



|                |           |           |
|----------------|-----------|-----------|
| MSTRG.14707.4  | 1.36887   | coding    |
| MSTRG.14707.2  | 0.806948  | coding    |
| MSTRG.14708.2  | 1.80313   | coding    |
| MSTRG.14708.6  | 1.48111   | coding    |
| MSTRG.14708.7  | 1.1379    | coding    |
| MSTRG.14709.1  | 1.79537   | coding    |
| MSTRG.14710.1  | -1.26212  | noncoding |
| MSTRG.14708.9  | 1.00394   | coding    |
| MSTRG.14711.1  | -0.471106 | noncoding |
| MSTRG.14708.10 | 0.156945  | coding    |
| MSTRG.14704.2  | 1.56334   | coding    |
| MSTRG.14704.3  | 1.3637    | coding    |
| MSTRG.14704.4  | 1.8146    | coding    |
| MSTRG.14706.1  | -1.33174  | noncoding |
| MSTRG.14715.1  | 1.90994   | coding    |
| MSTRG.14715.6  | 1.50564   | coding    |
| MSTRG.14715.7  | 1.46406   | coding    |
| MSTRG.14715.8  | 1.2936    | coding    |
| MSTRG.14716.1  | -0.072142 | noncoding |
| MSTRG.14717.1  | 0.441451  | coding    |
| MSTRG.14718.1  | -1.71332  | noncoding |
| MSTRG.14719.1  | -0.748132 | noncoding |
| MSTRG.14720.1  | 0.047226  | coding    |
| MSTRG.14721.1  | 0.73043   | coding    |
| MSTRG.14722.1  | 0.239493  | coding    |
| MSTRG.14723.1  | -1.03622  | noncoding |
| MSTRG.14727.1  | -0.654193 | noncoding |
| MSTRG.14727.2  | -1.36783  | noncoding |
| MSTRG.14730.1  | -0.281915 | noncoding |
| MSTRG.14731.2  | 0.441578  | coding    |
| MSTRG.14734.2  | 1.5467    | coding    |
| MSTRG.14735.2  | 2.11161   | coding    |
| MSTRG.14735.3  | 2.26386   | coding    |
| MSTRG.14736.1  | 0.510286  | coding    |
| MSTRG.14745.1  | -0.2921   | noncoding |
| MSTRG.14746.1  | -0.587521 | noncoding |
| MSTRG.14748.1  | -1.33746  | noncoding |
| MSTRG.14749.1  | -1.41861  | noncoding |
| MSTRG.14751.1  | -0.557841 | noncoding |
| MSTRG.14750.3  | -0.023872 | noncoding |
| MSTRG.14750.2  | 0.701991  | coding    |
| MSTRG.14750.5  | -0.323101 | noncoding |
| MSTRG.14750.4  | 0.987739  | coding    |
| MSTRG.14750.6  | -0.116621 | noncoding |
| MSTRG.14753.3  | 0.362556  | coding    |
| MSTRG.14754.1  | -1.942    | noncoding |
| MSTRG.14753.4  | -0.142084 | noncoding |
| MSTRG.14769.4  | 1.79957   | coding    |
| MSTRG.14771.1  | 2.2032    | coding    |
| MSTRG.14772.1  | 0.356423  | coding    |
| MSTRG.14772.2  | 0.219882  | coding    |
| MSTRG.14772.4  | 0.932929  | coding    |
| MSTRG.14773.1  | 0.455717  | coding    |
| MSTRG.14773.2  | 0.257933  | coding    |

|                 |           |           |
|-----------------|-----------|-----------|
| MSTRG. 14775. 1 | -1.45274  | noncoding |
| MSTRG. 14777. 1 | 0.558251  | coding    |
| MSTRG. 14778. 1 | -0.328901 | noncoding |
| MSTRG. 14780. 2 | 2.58151   | coding    |
| MSTRG. 14780. 3 | 2.62503   | coding    |
| MSTRG. 14782. 6 | 0.204846  | coding    |
| MSTRG. 14785. 4 | 1.20718   | coding    |
| MSTRG. 14785. 5 | 0.820274  | coding    |
| MSTRG. 14787. 1 | -1.1896   | noncoding |
| MSTRG. 14789. 4 | 1.2127    | coding    |
| MSTRG. 14790. 3 | 1.96976   | coding    |
| MSTRG. 14790. 4 | 2.10335   | coding    |
| MSTRG. 14791. 2 | -0.683376 | noncoding |
| MSTRG. 14792. 2 | -0.731117 | noncoding |
| MSTRG. 14793. 2 | 0.541464  | coding    |
| MSTRG. 14796. 1 | 0.368375  | coding    |
| MSTRG. 14800. 1 | 0.738672  | coding    |
| MSTRG. 14801. 2 | 1.76861   | coding    |
| MSTRG. 14808. 2 | 1.34982   | coding    |
| MSTRG. 14808. 4 | 1.69881   | coding    |
| MSTRG. 14818. 2 | 0.98486   | coding    |
| MSTRG. 14818. 4 | 1.00698   | coding    |
| MSTRG. 14819. 1 | 2.68686   | coding    |
| MSTRG. 14821. 2 | 1.36794   | coding    |
| MSTRG. 14821. 3 | 1.38335   | coding    |
| MSTRG. 14821. 5 | 0.833401  | coding    |
| MSTRG. 14814. 1 | -2.07357  | noncoding |
| MSTRG. 14815. 3 | 1.70665   | coding    |
| MSTRG. 14827. 1 | -1.82091  | noncoding |
| MSTRG. 14828. 3 | 0.829875  | coding    |
| MSTRG. 14828. 4 | 1.17152   | coding    |
| MSTRG. 14828. 2 | 0.912079  | coding    |
| MSTRG. 14828. 6 | -0.548698 | noncoding |
| MSTRG. 14830. 5 | 2.97983   | coding    |
| MSTRG. 14835. 1 | -0.334815 | noncoding |
| MSTRG. 14835. 2 | -0.530253 | noncoding |
| MSTRG. 14834. 5 | -0.577782 | noncoding |
| MSTRG. 14840. 1 | 1.75951   | coding    |
| MSTRG. 14840. 5 | 3.11589   | coding    |
| MSTRG. 14833. 7 | 0.65405   | coding    |
| MSTRG. 14833. 3 | 0.605616  | coding    |
| MSTRG. 14841. 1 | -0.454685 | noncoding |
| MSTRG. 14842. 3 | -0.78436  | noncoding |
| MSTRG. 14842. 2 | -0.184258 | noncoding |
| MSTRG. 14842. 1 | -0.20377  | noncoding |
| MSTRG. 14842. 5 | -0.238736 | noncoding |
| MSTRG. 14844. 2 | 1.08837   | coding    |
| MSTRG. 14846. 1 | 1.63827   | coding    |
| MSTRG. 14846. 3 | 1.69795   | coding    |
| MSTRG. 14849. 1 | 2.51091   | coding    |
| MSTRG. 14849. 2 | 1.762     | coding    |
| MSTRG. 14849. 3 | 1.70308   | coding    |
| MSTRG. 14852. 1 | 1.36851   | coding    |
| MSTRG. 14852. 2 | 0.248965  | coding    |

|               |           |           |
|---------------|-----------|-----------|
| MSTRG.14853.1 | -1.9553   | noncoding |
| MSTRG.14852.3 | -0.482629 | noncoding |
| MSTRG.14854.2 | 0.010896  | coding    |
| MSTRG.14854.1 | 0.00291   | coding    |
| MSTRG.14854.3 | -0.177755 | noncoding |
| MSTRG.14854.4 | -0.177755 | noncoding |
| MSTRG.14854.5 | -0.998243 | noncoding |
| MSTRG.14855.1 | 1.82382   | coding    |
| MSTRG.14856.1 | -2.07523  | noncoding |
| MSTRG.14864.1 | -1.34031  | noncoding |
| MSTRG.14866.2 | 0.922957  | coding    |
| MSTRG.14866.3 | 0.856251  | coding    |
| MSTRG.14867.5 | 0.317617  | coding    |
| MSTRG.14867.6 | 0.853465  | coding    |
| MSTRG.14865.2 | 0.254942  | coding    |
| MSTRG.14869.2 | 2.90298   | coding    |
| MSTRG.14869.5 | 3.05847   | coding    |
| MSTRG.14869.1 | 2.72784   | coding    |
| MSTRG.14869.3 | 2.7974    | coding    |
| MSTRG.14868.1 | 0.390749  | coding    |
| MSTRG.14871.2 | -1.24876  | noncoding |
| MSTRG.14871.1 | -0.682782 | noncoding |
| MSTRG.14871.3 | -1.13626  | noncoding |
| MSTRG.14872.2 | 1.55882   | coding    |
| MSTRG.14872.3 | 2.06405   | coding    |
| MSTRG.14873.2 | 1.52094   | coding    |
| MSTRG.14873.3 | 1.15069   | coding    |
| MSTRG.14875.1 | -0.755618 | noncoding |
| MSTRG.14883.1 | -0.414502 | noncoding |
| MSTRG.14884.1 | -0.139743 | noncoding |
| MSTRG.14885.1 | -2.09746  | noncoding |
| MSTRG.14877.1 | -1.982    | noncoding |
| MSTRG.14878.1 | -1.14755  | noncoding |
| MSTRG.14890.2 | -0.614819 | noncoding |
| MSTRG.14892.2 | -1.87263  | noncoding |
| MSTRG.14905.1 | 0.710394  | coding    |
| MSTRG.14907.2 | -0.588795 | noncoding |
| MSTRG.14909.2 | 0.691548  | coding    |
| MSTRG.14909.3 | 0.704382  | coding    |
| MSTRG.14909.4 | -0.320908 | noncoding |
| MSTRG.14909.5 | 0.414857  | coding    |
| MSTRG.14911.1 | 1.208     | coding    |
| MSTRG.14913.2 | 2.19897   | coding    |
| MSTRG.14913.3 | 2.23858   | coding    |
| MSTRG.14921.1 | -0.654593 | noncoding |
| MSTRG.14920.2 | 0.573118  | coding    |
| MSTRG.14914.2 | 1.21804   | coding    |
| MSTRG.14915.1 | -0.806496 | noncoding |
| MSTRG.14915.3 | 0.378432  | coding    |
| MSTRG.14915.4 | 0.032228  | coding    |
| MSTRG.14930.4 | -0.196258 | noncoding |
| MSTRG.14930.5 | 0.828544  | coding    |
| MSTRG.14930.6 | -0.460525 | noncoding |
| MSTRG.14931.1 | -0.510173 | noncoding |

|                 |            |           |
|-----------------|------------|-----------|
| MSTRG. 14932. 1 | 0. 085254  | coding    |
| MSTRG. 14933. 1 | -0. 685343 | noncoding |
| MSTRG. 14933. 2 | -0. 620564 | noncoding |
| MSTRG. 14939. 1 | -1. 65753  | noncoding |
| MSTRG. 14940. 2 | 0. 736399  | coding    |
| MSTRG. 14944. 1 | 1. 7044    | coding    |
| MSTRG. 14945. 1 | 1. 01914   | coding    |
| MSTRG. 14945. 5 | 1. 0013    | coding    |
| MSTRG. 14945. 6 | 1. 04221   | coding    |
| MSTRG. 14946. 1 | -1. 4844   | noncoding |
| MSTRG. 14947. 1 | -0. 765999 | noncoding |
| MSTRG. 14945. 7 | 1. 22199   | coding    |
| MSTRG. 14948. 1 | -0. 632799 | noncoding |
| MSTRG. 14945. 8 | 0. 452624  | coding    |
| MSTRG. 14945. 9 | 0. 662717  | coding    |
| MSTRG. 14942. 2 | 0. 238199  | coding    |
| MSTRG. 14942. 3 | 0. 322932  | coding    |
| MSTRG. 14942. 6 | -0. 819149 | noncoding |
| MSTRG. 14942. 5 | -0. 379581 | noncoding |
| MSTRG. 14942. 4 | -0. 374148 | noncoding |
| MSTRG. 14958. 1 | -0. 38045  | noncoding |
| MSTRG. 14957. 2 | -0. 045244 | noncoding |
| MSTRG. 14959. 1 | -1. 40167  | noncoding |
| MSTRG. 14962. 2 | 1. 10282   | coding    |
| MSTRG. 14960. 1 | -2. 72728  | noncoding |
| MSTRG. 14965. 4 | 0. 777475  | coding    |
| MSTRG. 14965. 3 | 2. 75123   | coding    |
| MSTRG. 14965. 1 | 2. 85434   | coding    |
| MSTRG. 14965. 2 | 2. 93349   | coding    |
| MSTRG. 14965. 5 | 2. 86373   | coding    |
| MSTRG. 14966. 1 | -0. 618212 | noncoding |
| MSTRG. 14968. 7 | 1. 80201   | coding    |
| MSTRG. 14968. 4 | 2. 34569   | coding    |
| MSTRG. 14968. 5 | 2. 25662   | coding    |
| MSTRG. 14968. 8 | 2. 59591   | coding    |
| MSTRG. 14969. 1 | -0. 77086  | noncoding |
| MSTRG. 14970. 1 | -1. 83579  | noncoding |
| MSTRG. 14975. 1 | -1. 11975  | noncoding |
| MSTRG. 14986. 2 | 0. 990836  | coding    |
| MSTRG. 14986. 3 | 0. 876592  | coding    |
| MSTRG. 14987. 2 | 2. 37744   | coding    |
| MSTRG. 14989. 1 | 1. 2165    | coding    |
| MSTRG. 14989. 2 | 1. 41744   | coding    |
| MSTRG. 14989. 3 | 1. 44048   | coding    |
| MSTRG. 14990. 1 | -0. 833042 | noncoding |
| MSTRG. 14992. 2 | 1. 46543   | coding    |
| MSTRG. 15000. 1 | -1. 14869  | noncoding |
| MSTRG. 15001. 1 | -0. 814932 | noncoding |
| MSTRG. 15007. 4 | 2. 47808   | coding    |
| MSTRG. 15007. 5 | 2. 52069   | coding    |
| MSTRG. 15007. 7 | -0. 214891 | noncoding |
| MSTRG. 15007. 8 | 2. 01023   | coding    |
| MSTRG. 14997. 1 | -2. 4725   | noncoding |
| MSTRG. 14998. 1 | -2. 23508  | noncoding |

|               |           |           |
|---------------|-----------|-----------|
| MSTRG.15017.1 | -1.98276  | noncoding |
| MSTRG.15018.1 | -0.604447 | noncoding |
| MSTRG.15021.1 | 1.12833   | coding    |
| MSTRG.15021.4 | 1.02971   | coding    |
| MSTRG.15022.1 | -0.444106 | noncoding |
| MSTRG.15023.4 | 1.46552   | coding    |
| MSTRG.15023.5 | 1.13191   | coding    |
| MSTRG.15033.1 | 2.47949   | coding    |
| MSTRG.15033.2 | 3.24905   | coding    |
| MSTRG.15033.5 | 3.1953    | coding    |
| MSTRG.15026.1 | -2.34727  | noncoding |
| MSTRG.15028.1 | 1.43818   | coding    |
| MSTRG.15038.2 | -0.259782 | noncoding |
| MSTRG.15046.1 | 1.69012   | coding    |
| MSTRG.15046.4 | 2.37803   | coding    |
| MSTRG.15046.5 | 0.495325  | coding    |
| MSTRG.15046.6 | 0.665947  | coding    |
| MSTRG.15046.7 | 1.5578    | coding    |
| MSTRG.15047.1 | -0.337514 | noncoding |
| MSTRG.15047.2 | -0.249063 | noncoding |
| MSTRG.15046.9 | 0.029389  | coding    |
| MSTRG.15050.6 | 0.087556  | coding    |
| MSTRG.15050.2 | 0.130416  | coding    |
| MSTRG.15050.4 | 0.206084  | coding    |
| MSTRG.15050.7 | 0.538027  | coding    |
| MSTRG.15051.1 | 1.81021   | coding    |
| MSTRG.15051.2 | 0.6625    | coding    |
| MSTRG.15051.3 | 0.727199  | coding    |
| MSTRG.15051.4 | 0.64481   | coding    |
| MSTRG.15052.2 | -2.41765  | noncoding |
| MSTRG.15054.1 | -0.874755 | noncoding |
| MSTRG.15043.1 | -0.610209 | noncoding |
| MSTRG.15039.1 | -2.14384  | noncoding |
| MSTRG.15055.2 | 0.983241  | coding    |
| MSTRG.15055.4 | 0.068239  | coding    |
| MSTRG.15055.6 | 1.83914   | coding    |
| MSTRG.15055.7 | 1.11239   | coding    |
| MSTRG.15055.8 | 1.01254   | coding    |
| MSTRG.15057.1 | -1.49033  | noncoding |
| MSTRG.15058.1 | -1.10681  | noncoding |
| MSTRG.15045.1 | -2.96154  | noncoding |
| MSTRG.15068.1 | -2.64341  | noncoding |
| MSTRG.15072.1 | -2.16864  | noncoding |
| MSTRG.15072.2 | -2.4043   | noncoding |
| MSTRG.15080.1 | 0.283234  | coding    |
| MSTRG.15083.4 | 2.25323   | coding    |
| MSTRG.15083.3 | 2.42709   | coding    |
| MSTRG.15083.5 | 1.63228   | coding    |
| MSTRG.15084.1 | -0.067699 | noncoding |
| MSTRG.15085.1 | -0.474898 | noncoding |
| MSTRG.15090.1 | 1.09567   | coding    |
| MSTRG.15090.2 | 1.8228    | coding    |
| MSTRG.15091.1 | -0.387293 | noncoding |
| MSTRG.15092.1 | -0.7079   | noncoding |

|                  |            |           |
|------------------|------------|-----------|
| MSTRG. 15093. 10 | 0. 454719  | coding    |
| MSTRG. 15093. 9  | 0. 545766  | coding    |
| MSTRG. 15093. 11 | 0. 712599  | coding    |
| MSTRG. 15093. 12 | 1. 81238   | coding    |
| MSTRG. 15097. 3  | 1. 40346   | coding    |
| MSTRG. 15097. 4  | 0. 816471  | coding    |
| MSTRG. 15100. 2  | 1. 71815   | coding    |
| MSTRG. 15105. 1  | 1. 84104   | coding    |
| MSTRG. 15105. 2  | 1. 48829   | coding    |
| MSTRG. 15105. 5  | 1. 81211   | coding    |
| MSTRG. 15105. 3  | 1. 7485    | coding    |
| MSTRG. 15105. 4  | 1. 9047    | coding    |
| MSTRG. 15105. 6  | 2. 55618   | coding    |
| MSTRG. 15105. 8  | 1. 12951   | coding    |
| MSTRG. 15105. 9  | 0. 454548  | coding    |
| MSTRG. 15106. 1  | 0. 370577  | coding    |
| MSTRG. 15106. 2  | 0. 047007  | coding    |
| MSTRG. 15106. 3  | -0. 618473 | noncoding |
| MSTRG. 15107. 1  | 1. 22928   | coding    |
| MSTRG. 15108. 1  | 1. 5915    | coding    |
| MSTRG. 15108. 2  | 0. 221864  | coding    |
| MSTRG. 15109. 1  | -2. 25265  | noncoding |
| MSTRG. 15109. 2  | -2. 02244  | noncoding |
| MSTRG. 15105. 11 | -0. 591375 | noncoding |
| MSTRG. 15124. 5  | 1. 24253   | coding    |
| MSTRG. 15126. 1  | -1. 76551  | noncoding |
| MSTRG. 15127. 5  | -0. 480917 | noncoding |
| MSTRG. 15127. 4  | 0. 79252   | coding    |
| MSTRG. 15127. 3  | 0. 632006  | coding    |
| MSTRG. 15127. 1  | 0. 7557    | coding    |
| MSTRG. 15129. 1  | 0. 221446  | coding    |
| MSTRG. 15131. 1  | 0. 013188  | coding    |
| MSTRG. 15132. 1  | -0. 822662 | noncoding |
| MSTRG. 15118. 3  | 2. 28067   | coding    |
| MSTRG. 15119. 1  | -2. 40261  | noncoding |
| MSTRG. 15141. 1  | -0. 216756 | noncoding |
| MSTRG. 15141. 2  | 2. 84124   | coding    |
| MSTRG. 15141. 4  | 2. 99502   | coding    |
| MSTRG. 15138. 1  | -0. 361472 | noncoding |
| MSTRG. 15138. 2  | -1. 28169  | noncoding |
| MSTRG. 15145. 1  | 2. 76837   | coding    |
| MSTRG. 15146. 4  | 0. 220855  | coding    |
| MSTRG. 15146. 5  | -0. 337912 | noncoding |
| MSTRG. 15146. 6  | -0. 479169 | noncoding |
| MSTRG. 15146. 7  | -0. 185645 | noncoding |
| MSTRG. 15146. 10 | -0. 820472 | noncoding |
| MSTRG. 15146. 13 | -0. 814109 | noncoding |
| MSTRG. 15146. 11 | -0. 696852 | noncoding |
| MSTRG. 15146. 15 | -0. 967879 | noncoding |
| MSTRG. 15146. 8  | -0. 970332 | noncoding |
| MSTRG. 15146. 14 | -0. 656888 | noncoding |
| MSTRG. 15146. 12 | -0. 438488 | noncoding |
| MSTRG. 15147. 2  | 1. 12092   | coding    |
| MSTRG. 15149. 1  | 1. 71526   | coding    |

|                 |           |           |
|-----------------|-----------|-----------|
| MSTRG. 15151.1  | 0.34095   | coding    |
| MSTRG. 15152.1  | -0.183256 | noncoding |
| MSTRG. 15143.1  | -0.837167 | noncoding |
| MSTRG. 15156.3  | 1.67413   | coding    |
| MSTRG. 15156.4  | 0.494601  | coding    |
| MSTRG. 15153.1  | 1.18431   | coding    |
| MSTRG. 15153.2  | 1.2104    | coding    |
| MSTRG. 15167.2  | -0.312614 | noncoding |
| MSTRG. 15174.3  | 3.10976   | coding    |
| MSTRG. 15175.1  | -0.18616  | noncoding |
| MSTRG. 15176.1  | -1.63105  | noncoding |
| MSTRG. 15174.4  | 1.26675   | coding    |
| MSTRG. 15174.5  | 0.827505  | coding    |
| MSTRG. 15177.1  | -1.79574  | noncoding |
| MSTRG. 15181.1  | 2.01838   | coding    |
| MSTRG. 15181.5  | -0.347846 | noncoding |
| MSTRG. 15183.2  | -0.356659 | noncoding |
| MSTRG. 15184.1  | -0.845516 | noncoding |
| MSTRG. 15184.2  | 1.11434   | coding    |
| MSTRG. 15185.1  | -0.02509  | noncoding |
| MSTRG. 15184.3  | 1.44153   | coding    |
| MSTRG. 15184.5  | 1.58553   | coding    |
| MSTRG. 15184.9  | -1.57969  | noncoding |
| MSTRG. 15184.10 | -0.294096 | noncoding |
| MSTRG. 15188.1  | -1.91135  | noncoding |
| MSTRG. 15188.2  | -2.04896  | noncoding |
| MSTRG. 15190.1  | 1.09243   | coding    |
| MSTRG. 15190.6  | -0.211459 | noncoding |
| MSTRG. 15191.1  | -0.79977  | noncoding |
| MSTRG. 15192.1  | -0.365846 | noncoding |
| MSTRG. 15194.1  | -0.294439 | noncoding |
| MSTRG. 15219.1  | 2.98296   | coding    |
| MSTRG. 15219.2  | 2.05104   | coding    |
| MSTRG. 15219.3  | 2.91708   | coding    |
| MSTRG. 15220.1  | -2.05743  | noncoding |
| MSTRG. 15221.1  | -1.93876  | noncoding |
| MSTRG. 15227.1  | -0.297682 | noncoding |
| MSTRG. 15253.1  | -0.137352 | noncoding |
| MSTRG. 15197.1  | -2.0987   | noncoding |
| MSTRG. 15199.1  | -1.34573  | noncoding |
| MSTRG. 15209.3  | 2.14285   | coding    |
| MSTRG. 15210.1  | -0.600217 | noncoding |
| MSTRG. 15210.2  | -1.85973  | noncoding |
| MSTRG. 15209.4  | -0.740702 | noncoding |
| MSTRG. 15212.1  | -2.53582  | noncoding |
| MSTRG. 15213.2  | -0.993266 | noncoding |
| MSTRG. 15268.1  | -1.78465  | noncoding |
| MSTRG. 15268.2  | -1.82421  | noncoding |
| MSTRG. 15284.1  | 1.01177   | coding    |
| MSTRG. 15287.5  | 2.81091   | coding    |
| MSTRG. 15287.6  | 2.94253   | coding    |
| MSTRG. 15291.1  | 1.75244   | coding    |
| MSTRG. 15296.3  | 0.805884  | coding    |
| MSTRG. 15302.2  | 1.88292   | coding    |

|                 |            |           |
|-----------------|------------|-----------|
| MSTRG. 15312. 1 | 0. 451334  | coding    |
| MSTRG. 15304. 1 | -0. 623268 | noncoding |
| MSTRG. 15328. 2 | 0. 592983  | coding    |
| MSTRG. 15333. 1 | -1. 18869  | noncoding |
| MSTRG. 15338. 1 | -0. 731429 | noncoding |
| MSTRG. 15347. 1 | 0. 260517  | coding    |
| MSTRG. 15353. 1 | 0. 639427  | coding    |
| MSTRG. 15359. 2 | 1. 72698   | coding    |
| MSTRG. 15360. 1 | 0. 361614  | coding    |
| MSTRG. 15360. 2 | -1. 32635  | noncoding |
| MSTRG. 15362. 1 | 0. 46278   | coding    |
| MSTRG. 15357. 1 | -0. 678647 | noncoding |
| MSTRG. 15368. 2 | 1. 08563   | coding    |
| MSTRG. 15368. 3 | 1. 06848   | coding    |
| MSTRG. 15375. 2 | 3. 09903   | coding    |
| MSTRG. 15379. 2 | 2. 79828   | coding    |
| MSTRG. 15381. 1 | -0. 44179  | noncoding |
| MSTRG. 15381. 2 | -0. 2388   | noncoding |
| MSTRG. 15381. 3 | -0. 131454 | noncoding |
| MSTRG. 15380. 1 | -0. 027075 | noncoding |
| MSTRG. 15380. 2 | -0. 455838 | noncoding |
| MSTRG. 15383. 1 | -1. 91402  | noncoding |
| MSTRG. 15386. 3 | 1. 66255   | coding    |
| MSTRG. 15386. 5 | 0. 265344  | coding    |
| MSTRG. 15394. 2 | 0. 348725  | coding    |
| MSTRG. 15394. 1 | 1. 1928    | coding    |
| MSTRG. 15399. 1 | -1. 40114  | noncoding |
| MSTRG. 15405. 4 | 1. 0351    | coding    |
| MSTRG. 15405. 6 | 1. 02748   | coding    |
| MSTRG. 15402. 1 | -0. 288229 | noncoding |
| MSTRG. 15416. 3 | -2. 24464  | noncoding |
| MSTRG. 15416. 4 | -0. 758014 | noncoding |
| MSTRG. 15421. 1 | 2. 43866   | coding    |
| MSTRG. 15421. 2 | 1. 52925   | coding    |
| MSTRG. 15422. 1 | -1. 69656  | noncoding |
| MSTRG. 15423. 1 | -0. 560839 | noncoding |
| MSTRG. 15426. 4 | 1. 35429   | coding    |
| MSTRG. 15427. 2 | -0. 303304 | noncoding |
| MSTRG. 15429. 6 | 0. 923986  | coding    |
| MSTRG. 15429. 7 | 1. 13931   | coding    |
| MSTRG. 15429. 8 | 1. 34197   | coding    |
| MSTRG. 15431. 1 | 1. 9197    | coding    |
| MSTRG. 15431. 3 | 1. 98501   | coding    |
| MSTRG. 15433. 3 | 1. 40507   | coding    |
| MSTRG. 15433. 5 | 0. 478734  | coding    |
| MSTRG. 15436. 2 | 1. 69431   | coding    |
| MSTRG. 15436. 3 | 1. 44874   | coding    |
| MSTRG. 15442. 1 | 0. 277168  | coding    |
| MSTRG. 15444. 2 | -0. 215074 | noncoding |
| MSTRG. 15444. 3 | -0. 371632 | noncoding |
| MSTRG. 15447. 5 | -0. 007248 | noncoding |
| MSTRG. 15447. 4 | -0. 424563 | noncoding |
| MSTRG. 15447. 6 | -0. 452399 | noncoding |
| MSTRG. 15447. 8 | -0. 511679 | noncoding |



|               |           |           |
|---------------|-----------|-----------|
| MSTRG.15447.9 | -0.248163 | noncoding |
| MSTRG.15450.2 | 0.606787  | coding    |
| MSTRG.15450.3 | 1.4401    | coding    |
| MSTRG.15457.1 | 0.648679  | coding    |
| MSTRG.15467.2 | 2.40407   | coding    |
| MSTRG.15469.1 | -1.82887  | noncoding |
| MSTRG.15470.1 | -2.31963  | noncoding |
| MSTRG.15471.1 | -2.55498  | noncoding |
| MSTRG.15486.2 | 2.66525   | coding    |
| MSTRG.15486.4 | -1.07453  | noncoding |
| MSTRG.15490.1 | -0.014547 | noncoding |
| MSTRG.15491.1 | -0.867237 | noncoding |
| MSTRG.15492.1 | 0.506565  | coding    |
| MSTRG.15492.2 | 0.535374  | coding    |
| MSTRG.15493.1 | 0.727124  | coding    |
| MSTRG.15494.1 | 0.535114  | coding    |
| MSTRG.15486.5 | 0.694683  | coding    |
| MSTRG.15494.2 | -0.406412 | noncoding |
| MSTRG.15497.1 | 0.200827  | coding    |
| MSTRG.15499.1 | 0.045683  | coding    |
| MSTRG.15499.2 | -1.89783  | noncoding |
| MSTRG.15500.1 | -0.188861 | noncoding |
| MSTRG.15502.1 | 0.265913  | coding    |
| MSTRG.15503.1 | 0.84049   | coding    |
| MSTRG.15502.2 | 0.554386  | coding    |
| MSTRG.15477.1 | -1.04633  | noncoding |
| MSTRG.15480.2 | -0.313459 | noncoding |
| MSTRG.15532.2 | 2.82992   | coding    |
| MSTRG.15532.1 | 2.84089   | coding    |
| MSTRG.15532.4 | 1.40396   | coding    |
| MSTRG.15532.5 | 2.49245   | coding    |
| MSTRG.15532.3 | 2.82569   | coding    |
| MSTRG.15532.6 | 2.4869    | coding    |
| MSTRG.15533.1 | -0.514628 | noncoding |
| MSTRG.15532.8 | 2.90616   | coding    |
| MSTRG.15534.1 | -0.103302 | noncoding |
| MSTRG.15535.1 | 2.46913   | coding    |
| MSTRG.15536.1 | 0.539888  | coding    |
| MSTRG.15535.3 | 2.86619   | coding    |
| MSTRG.15535.4 | 2.68745   | coding    |
| MSTRG.15538.1 | 0.409081  | coding    |
| MSTRG.15517.1 | 0.520795  | coding    |
| MSTRG.15518.4 | 1.89335   | coding    |
| MSTRG.15518.5 | 1.82583   | coding    |
| MSTRG.15518.6 | 0.746909  | coding    |
| MSTRG.15518.8 | 0.957518  | coding    |
| MSTRG.15518.7 | 0.765044  | coding    |
| MSTRG.15519.1 | -0.527005 | noncoding |
| MSTRG.15521.2 | 1.18044   | coding    |
| MSTRG.15521.3 | 0.174262  | coding    |
| MSTRG.15528.3 | -1.57138  | noncoding |
| MSTRG.15540.2 | 2.19482   | coding    |
| MSTRG.15540.8 | 0.637648  | coding    |
| MSTRG.15540.7 | 1.48596   | coding    |

|                  |            |           |
|------------------|------------|-----------|
| MSTRG. 15547. 1  | -0. 31537  | noncoding |
| MSTRG. 15547. 2  | -0. 097162 | noncoding |
| MSTRG. 15547. 3  | -0. 312464 | noncoding |
| MSTRG. 15548. 1  | 1. 09264   | coding    |
| MSTRG. 15548. 2  | -0. 089368 | noncoding |
| MSTRG. 15548. 3  | -0. 134974 | noncoding |
| MSTRG. 15549. 1  | -1. 76549  | noncoding |
| MSTRG. 15554. 1  | 0. 338683  | coding    |
| MSTRG. 15572. 1  | -0. 691456 | noncoding |
| MSTRG. 15571. 3  | 0. 010673  | coding    |
| MSTRG. 15571. 4  | 0. 270377  | coding    |
| MSTRG. 15563. 1  | -0. 584402 | noncoding |
| MSTRG. 15574. 1  | -0. 340118 | noncoding |
| MSTRG. 15575. 1  | -0. 34725  | noncoding |
| MSTRG. 15594. 4  | 0. 040466  | coding    |
| MSTRG. 15595. 1  | 1. 31932   | coding    |
| MSTRG. 15595. 2  | 0. 377263  | coding    |
| MSTRG. 15596. 2  | 1. 01304   | coding    |
| MSTRG. 15596. 3  | 0. 65674   | coding    |
| MSTRG. 15600. 2  | 0. 609591  | coding    |
| MSTRG. 15601. 1  | -1. 4837   | noncoding |
| MSTRG. 15602. 1  | -1. 00792  | noncoding |
| MSTRG. 15602. 2  | -0. 320485 | noncoding |
| MSTRG. 15603. 3  | 1. 85199   | coding    |
| MSTRG. 15611. 2  | -0. 142391 | noncoding |
| MSTRG. 15614. 2  | -1. 24215  | noncoding |
| MSTRG. 15618. 1  | 0. 733377  | coding    |
| MSTRG. 15619. 2  | 0. 525119  | coding    |
| MSTRG. 15619. 3  | -0. 081909 | noncoding |
| MSTRG. 15619. 4  | -0. 033394 | noncoding |
| MSTRG. 15625. 1  | 1. 061     | coding    |
| MSTRG. 15625. 2  | 1. 28661   | coding    |
| MSTRG. 15628. 2  | 3. 08402   | coding    |
| MSTRG. 15630. 3  | -2. 00119  | noncoding |
| MSTRG. 15630. 2  | 0. 586146  | coding    |
| MSTRG. 15638. 2  | 1. 57499   | coding    |
| MSTRG. 15638. 3  | 2. 00416   | coding    |
| MSTRG. 15638. 4  | 0. 967736  | coding    |
| MSTRG. 15638. 8  | -1. 03634  | noncoding |
| MSTRG. 15638. 10 | 1. 32819   | coding    |
| MSTRG. 15644. 1  | 1. 59278   | coding    |
| MSTRG. 15644. 4  | 0. 216051  | coding    |
| MSTRG. 15644. 7  | -0. 038444 | noncoding |
| MSTRG. 15644. 5  | 0. 01903   | coding    |
| MSTRG. 15644. 6  | 0. 202958  | coding    |
| MSTRG. 15650. 1  | -0. 878565 | noncoding |
| MSTRG. 15651. 1  | -1. 1562   | noncoding |
| MSTRG. 15656. 1  | -0. 372942 | noncoding |
| MSTRG. 15671. 1  | -0. 31419  | noncoding |
| MSTRG. 15654. 1  | 1. 00364   | coding    |
| MSTRG. 15654. 2  | 0. 846073  | coding    |
| MSTRG. 15677. 1  | 1. 20103   | coding    |
| MSTRG. 15678. 2  | 1. 27608   | coding    |
| MSTRG. 15679. 1  | -1. 52546  | noncoding |

|                |           |           |
|----------------|-----------|-----------|
| MSTRG.15678.3  | 2.32354   | coding    |
| MSTRG.15678.4  | 1.7854    | coding    |
| MSTRG.15672.1  | -1.76612  | noncoding |
| MSTRG.15674.1  | 0.067176  | coding    |
| MSTRG.15675.1  | -0.862515 | noncoding |
| MSTRG.15681.2  | -1.70903  | noncoding |
| MSTRG.15681.3  | -2.33593  | noncoding |
| MSTRG.15681.5  | 1.03241   | coding    |
| MSTRG.15681.4  | 0.878573  | coding    |
| MSTRG.15682.1  | 0.463499  | coding    |
| MSTRG.15683.1  | 0.086404  | coding    |
| MSTRG.15681.6  | -0.846753 | noncoding |
| MSTRG.15684.1  | 0.362946  | coding    |
| MSTRG.15681.8  | 0.731709  | coding    |
| MSTRG.15685.2  | 1.19034   | coding    |
| MSTRG.15692.1  | -2.12045  | noncoding |
| MSTRG.15694.3  | 0.898551  | coding    |
| MSTRG.15694.1  | 0.878237  | coding    |
| MSTRG.15694.2  | 0.872827  | coding    |
| MSTRG.15694.4  | 0.882972  | coding    |
| MSTRG.15701.4  | 1.34371   | coding    |
| MSTRG.15701.5  | 1.60356   | coding    |
| MSTRG.15703.5  | 0.439408  | coding    |
| MSTRG.15703.4  | 0.633283  | coding    |
| MSTRG.15703.6  | 0.620166  | coding    |
| MSTRG.15703.7  | 0.5536    | coding    |
| MSTRG.15705.3  | 1.94859   | coding    |
| MSTRG.15707.2  | -0.299546 | noncoding |
| MSTRG.15707.4  | -0.269009 | noncoding |
| MSTRG.15714.3  | 0.063557  | coding    |
| MSTRG.15714.4  | 0.340863  | coding    |
| MSTRG.15715.1  | 0.134147  | coding    |
| MSTRG.15715.5  | 1.02652   | coding    |
| MSTRG.15715.6  | 1.00022   | coding    |
| MSTRG.15719.2  | 0.307587  | coding    |
| MSTRG.15720.1  | 1.5469    | coding    |
| MSTRG.15720.2  | 1.41051   | coding    |
| MSTRG.15720.3  | 1.56654   | coding    |
| MSTRG.15708.1  | -0.320349 | noncoding |
| MSTRG.15709.1  | 1.10451   | coding    |
| MSTRG.15711.3  | -0.354201 | noncoding |
| MSTRG.15722.4  | 1.06188   | coding    |
| MSTRG.15722.10 | 1.06208   | coding    |
| MSTRG.15722.9  | 1.12138   | coding    |
| MSTRG.15724.2  | 1.98438   | coding    |
| MSTRG.15726.5  | 0.878258  | coding    |
| MSTRG.15726.6  | 1.02208   | coding    |
| MSTRG.15723.2  | 1.34646   | coding    |
| MSTRG.15723.3  | 1.06917   | coding    |
| MSTRG.15747.3  | 0.234352  | coding    |
| MSTRG.15750.2  | 0.690826  | coding    |
| MSTRG.15750.3  | 3.18952   | coding    |
| MSTRG.15750.4  | 2.45781   | coding    |
| MSTRG.15751.5  | 2.06676   | coding    |

|                 |           |           |
|-----------------|-----------|-----------|
| MSTRG. 15751.4  | 2.62263   | coding    |
| MSTRG. 15752.3  | 1.49244   | coding    |
| MSTRG. 15752.4  | 1.10791   | coding    |
| MSTRG. 15752.5  | 0.160338  | coding    |
| MSTRG. 15754.2  | 2.38651   | coding    |
| MSTRG. 15756.4  | -0.430557 | noncoding |
| MSTRG. 15766.3  | 1.27634   | coding    |
| MSTRG. 15766.4  | 1.28338   | coding    |
| MSTRG. 15766.10 | 1.03655   | coding    |
| MSTRG. 15766.8  | 1.06414   | coding    |
| MSTRG. 15766.9  | 1.03659   | coding    |
| MSTRG. 15767.1  | -1.26618  | noncoding |
| MSTRG. 15766.11 | 0.00171   | coding    |
| MSTRG. 15766.12 | -2.19638  | noncoding |
| MSTRG. 15766.13 | -1.64261  | noncoding |
| MSTRG. 15768.1  | -0.593223 | noncoding |
| MSTRG. 15769.1  | 0.506226  | coding    |
| MSTRG. 15773.1  | 0.581841  | coding    |
| MSTRG. 15773.2  | 0.319627  | coding    |
| MSTRG. 15776.1  | 0.414394  | coding    |
| MSTRG. 15776.2  | -0.468186 | noncoding |
| MSTRG. 15778.3  | -0.177603 | noncoding |
| MSTRG. 15778.2  | 0.42288   | coding    |
| MSTRG. 15781.1  | -0.713182 | noncoding |
| MSTRG. 15781.5  | 0.132069  | coding    |
| MSTRG. 15781.7  | -1.708    | noncoding |
| MSTRG. 15782.1  | 0.863647  | coding    |
| MSTRG. 15785.1  | -2.09605  | noncoding |
| MSTRG. 15786.1  | -0.291817 | noncoding |
| MSTRG. 15786.2  | -2.09384  | noncoding |
| MSTRG. 15786.3  | -0.723677 | noncoding |
| MSTRG. 15788.1  | -1.27113  | noncoding |
| MSTRG. 15791.1  | -2.34473  | noncoding |
| MSTRG. 15793.1  | -0.109647 | noncoding |
| MSTRG. 15795.1  | -2.28782  | noncoding |
| MSTRG. 15796.1  | 1.98386   | coding    |
| MSTRG. 15796.2  | -0.518641 | noncoding |
| MSTRG. 15796.3  | -0.568685 | noncoding |
| MSTRG. 15797.4  | -1.16796  | noncoding |
| MSTRG. 15797.6  | 0.316926  | coding    |
| MSTRG. 15798.1  | -0.584232 | noncoding |
| MSTRG. 15804.2  | 0.705723  | coding    |
| MSTRG. 15804.3  | 1.04766   | coding    |
| MSTRG. 15804.5  | 0.741588  | coding    |
| MSTRG. 15800.1  | -0.162896 | noncoding |
| MSTRG. 15801.1  | 2.51288   | coding    |
| MSTRG. 15809.10 | 2.02552   | coding    |
| MSTRG. 15810.1  | -2.07973  | noncoding |
| MSTRG. 15811.1  | 0.008372  | coding    |
| MSTRG. 15812.1  | -1.33267  | noncoding |
| MSTRG. 15813.2  | 1.65127   | coding    |
| MSTRG. 15813.1  | 1.70131   | coding    |
| MSTRG. 15813.3  | 1.85262   | coding    |
| MSTRG. 15813.4  | 1.91453   | coding    |

|                  |            |           |
|------------------|------------|-----------|
| MSTRG. 15809. 11 | 1. 17893   | coding    |
| MSTRG. 15806. 1  | 0. 526343  | coding    |
| MSTRG. 15807. 1  | 1. 00564   | coding    |
| MSTRG. 15816. 1  | -2. 4225   | noncoding |
| MSTRG. 15816. 2  | -1. 07881  | noncoding |
| MSTRG. 15814. 1  | -1. 17752  | noncoding |
| MSTRG. 15817. 1  | 0. 163518  | coding    |
| MSTRG. 15821. 1  | -2. 4191   | noncoding |
| MSTRG. 15822. 3  | 0. 472864  | coding    |
| MSTRG. 15826. 1  | -1. 07695  | noncoding |
| MSTRG. 15832. 1  | -2. 19705  | noncoding |
| MSTRG. 15834. 1  | -1. 26703  | noncoding |
| MSTRG. 15834. 2  | -1. 10182  | noncoding |
| MSTRG. 15835. 1  | -0. 723695 | noncoding |
| MSTRG. 15835. 2  | -1. 47147  | noncoding |
| MSTRG. 15841. 1  | 2. 54826   | coding    |
| MSTRG. 15841. 2  | 1. 61245   | coding    |
| MSTRG. 15843. 2  | 0. 050686  | coding    |
| MSTRG. 15846. 6  | 0. 350402  | coding    |
| MSTRG. 15846. 5  | 0. 643638  | coding    |
| MSTRG. 15847. 1  | -1. 65268  | noncoding |
| MSTRG. 15848. 1  | 0. 137337  | coding    |
| MSTRG. 15848. 2  | 0. 314474  | coding    |
| MSTRG. 15848. 3  | 0. 409175  | coding    |
| MSTRG. 15858. 1  | 1. 94193   | coding    |
| MSTRG. 15858. 2  | 2. 8302    | coding    |
| MSTRG. 15858. 3  | 2. 54715   | coding    |
| MSTRG. 15868. 1  | 1. 64323   | coding    |
| MSTRG. 15868. 6  | 2. 11485   | coding    |
| MSTRG. 15868. 9  | 2. 23264   | coding    |
| MSTRG. 15868. 7  | 1. 85849   | coding    |
| MSTRG. 15868. 3  | 2. 05176   | coding    |
| MSTRG. 15868. 10 | 1. 69912   | coding    |
| MSTRG. 15867. 3  | -0. 341822 | noncoding |
| MSTRG. 15873. 2  | 1. 37445   | coding    |
| MSTRG. 15874. 2  | 1. 32467   | coding    |
| MSTRG. 15879. 2  | 1. 9769    | coding    |
| MSTRG. 15886. 2  | 1. 67532   | coding    |
| MSTRG. 15890. 1  | -1. 48846  | noncoding |
| MSTRG. 15891. 2  | 1. 71683   | coding    |
| MSTRG. 15896. 2  | 0. 20019   | coding    |
| MSTRG. 15902. 5  | 1. 44224   | coding    |
| MSTRG. 15902. 3  | 1. 59906   | coding    |
| MSTRG. 15902. 4  | 2. 0203    | coding    |
| MSTRG. 15902. 6  | 1. 95096   | coding    |
| MSTRG. 15903. 1  | -2. 10515  | noncoding |
| MSTRG. 15897. 1  | -0. 565151 | noncoding |
| MSTRG. 15898. 1  | 0. 595693  | coding    |
| MSTRG. 15899. 3  | 2. 88181   | coding    |
| MSTRG. 15899. 2  | 2. 6513    | coding    |
| MSTRG. 15899. 4  | 2. 975     | coding    |
| MSTRG. 15909. 4  | 1. 72738   | coding    |
| MSTRG. 15909. 1  | 2. 23147   | coding    |
| MSTRG. 15909. 6  | 1. 78151   | coding    |

|                |           |           |
|----------------|-----------|-----------|
| MSTRG.15907.1  | -2.44021  | noncoding |
| MSTRG.15917.2  | 0.551704  | coding    |
| MSTRG.15917.3  | 1.05056   | coding    |
| MSTRG.15917.6  | 0.083231  | coding    |
| MSTRG.15917.7  | 0.085175  | coding    |
| MSTRG.15917.5  | 0.127239  | coding    |
| MSTRG.15917.8  | -0.155961 | noncoding |
| MSTRG.15917.9  | 0.226943  | coding    |
| MSTRG.15917.10 | 0.082402  | coding    |
| MSTRG.15914.2  | 1.48599   | coding    |
| MSTRG.15913.1  | 0.455565  | coding    |
| MSTRG.15921.1  | -1.6911   | noncoding |
| MSTRG.15929.1  | 2.33365   | coding    |
| MSTRG.15929.4  | 2.39209   | coding    |
| MSTRG.15930.1  | -0.581274 | noncoding |
| MSTRG.15929.5  | 2.41039   | coding    |
| MSTRG.15929.7  | 1.35673   | coding    |
| MSTRG.15929.9  | 1.39902   | coding    |
| MSTRG.15929.10 | 1.19733   | coding    |
| MSTRG.15929.11 | 2.00086   | coding    |
| MSTRG.15932.1  | 0.359974  | coding    |
| MSTRG.15932.2  | 0.25236   | coding    |
| MSTRG.15931.1  | -0.967318 | noncoding |
| MSTRG.15936.2  | -0.042841 | noncoding |
| MSTRG.15936.3  | 0.144714  | coding    |
| MSTRG.15937.3  | -0.340017 | noncoding |
| MSTRG.15935.1  | 0.43454   | coding    |
| MSTRG.15940.1  | 0.295541  | coding    |
| MSTRG.15940.4  | -0.24912  | noncoding |
| MSTRG.15943.1  | -1.49105  | noncoding |
| MSTRG.15961.2  | 0.620295  | coding    |
| MSTRG.15962.3  | 1.90856   | coding    |
| MSTRG.15962.2  | 2.52356   | coding    |
| MSTRG.15962.7  | 0.768593  | coding    |
| MSTRG.15963.1  | -0.400133 | noncoding |
| MSTRG.15964.1  | 0.295302  | coding    |
| MSTRG.15952.1  | 1.7963    | coding    |
| MSTRG.15955.1  | -1.04857  | noncoding |
| MSTRG.15956.1  | 1.25931   | coding    |
| MSTRG.15957.1  | 0.437855  | coding    |
| MSTRG.15958.1  | 0.168913  | coding    |
| MSTRG.15951.1  | -1.98244  | noncoding |
| MSTRG.15969.2  | 0.243707  | coding    |
| MSTRG.15969.3  | 0.355628  | coding    |
| MSTRG.15969.4  | 0.551493  | coding    |
| MSTRG.15973.1  | -2.02703  | noncoding |
| MSTRG.15974.1  | 2.07815   | coding    |
| MSTRG.15974.5  | 1.97648   | coding    |
| MSTRG.15978.5  | 1.70284   | coding    |
| MSTRG.15978.7  | 1.33546   | coding    |
| MSTRG.15978.6  | 0.858884  | coding    |
| MSTRG.15979.1  | -0.313711 | noncoding |
| MSTRG.15980.1  | -0.627534 | noncoding |
| MSTRG.15981.1  | -0.564085 | noncoding |

|                |           |           |
|----------------|-----------|-----------|
| MSTRG.15978.8  | -0.175233 | noncoding |
| MSTRG.15982.1  | -2.04971  | noncoding |
| MSTRG.15978.9  | 2.40206   | coding    |
| MSTRG.15976.2  | 0.879332  | coding    |
| MSTRG.15990.4  | 0.104945  | coding    |
| MSTRG.15994.1  | -1.1391   | noncoding |
| MSTRG.15996.1  | -1.87585  | noncoding |
| MSTRG.15997.1  | -1.37743  | noncoding |
| MSTRG.15998.4  | 0.948801  | coding    |
| MSTRG.15998.3  | 1.03792   | coding    |
| MSTRG.15998.10 | 1.15734   | coding    |
| MSTRG.15998.11 | 1.42139   | coding    |
| MSTRG.15998.9  | 1.30977   | coding    |
| MSTRG.15999.1  | -2.55298  | noncoding |
| MSTRG.16000.1  | -1.36351  | noncoding |
| MSTRG.16003.1  | 1.72407   | coding    |
| MSTRG.16004.1  | -0.875951 | noncoding |
| MSTRG.16006.1  | -2.0934   | noncoding |
| MSTRG.16005.2  | 0.308938  | coding    |
| MSTRG.16012.1  | -1.60494  | noncoding |
| MSTRG.16013.2  | 2.10791   | coding    |
| MSTRG.16014.1  | -1.27488  | noncoding |
| MSTRG.16015.2  | 1.18591   | coding    |
| MSTRG.16019.1  | 0.447961  | coding    |
| MSTRG.16019.2  | 0.627595  | coding    |
| MSTRG.16022.2  | 2.05822   | coding    |
| MSTRG.16027.2  | 1.40362   | coding    |
| MSTRG.16031.2  | 1.828     | coding    |
| MSTRG.16034.2  | 0.861779  | coding    |
| MSTRG.16035.1  | -1.34741  | noncoding |
| MSTRG.16039.1  | 1.81266   | coding    |
| MSTRG.16039.2  | 1.42697   | coding    |
| MSTRG.16041.1  | 1.07574   | coding    |
| MSTRG.16042.2  | -0.96646  | noncoding |
| MSTRG.16042.3  | -0.588302 | noncoding |
| MSTRG.16042.4  | -0.335359 | noncoding |
| MSTRG.16044.3  | 1.11782   | coding    |
| MSTRG.16049.2  | 0.722551  | coding    |
| MSTRG.16050.3  | -0.076649 | noncoding |
| MSTRG.16050.4  | 0.308249  | coding    |
| MSTRG.16052.1  | -0.7433   | noncoding |
| MSTRG.16052.2  | -1.0338   | noncoding |
| MSTRG.16052.3  | -0.905593 | noncoding |
| MSTRG.16056.1  | 1.15326   | coding    |
| MSTRG.16057.12 | 2.0381    | coding    |
| MSTRG.16057.15 | 2.00771   | coding    |
| MSTRG.16057.11 | 1.79314   | coding    |
| MSTRG.16057.14 | 1.79801   | coding    |
| MSTRG.16057.17 | 1.58735   | coding    |
| MSTRG.16057.19 | 1.87665   | coding    |
| MSTRG.16057.20 | 1.86158   | coding    |
| MSTRG.16067.2  | 0.393075  | coding    |
| MSTRG.16058.1  | 2.42464   | coding    |
| MSTRG.16064.2  | 1.69737   | coding    |

|                |           |           |
|----------------|-----------|-----------|
| MSTRG.16064.3  | 1.49707   | coding    |
| MSTRG.16064.4  | 1.94483   | coding    |
| MSTRG.16064.7  | 1.73439   | coding    |
| MSTRG.16069.2  | 1.69273   | coding    |
| MSTRG.16069.5  | 1.2785    | coding    |
| MSTRG.16069.6  | 1.11895   | coding    |
| MSTRG.16069.8  | 1.05349   | coding    |
| MSTRG.16072.1  | -1.02201  | noncoding |
| MSTRG.16079.2  | 2.20534   | coding    |
| MSTRG.16079.4  | 2.15353   | coding    |
| MSTRG.16074.1  | 1.48482   | coding    |
| MSTRG.16074.3  | 0.464495  | coding    |
| MSTRG.16081.1  | 1.33732   | coding    |
| MSTRG.16082.2  | 1.25108   | coding    |
| MSTRG.16082.3  | 1.38314   | coding    |
| MSTRG.16082.4  | 0.021479  | coding    |
| MSTRG.16076.2  | 0.787221  | coding    |
| MSTRG.16083.1  | -0.969307 | noncoding |
| MSTRG.16083.2  | -0.635928 | noncoding |
| MSTRG.16083.3  | -1.2828   | noncoding |
| MSTRG.16088.2  | 0.542685  | coding    |
| MSTRG.16088.4  | 0.843603  | coding    |
| MSTRG.16085.1  | 1.13001   | coding    |
| MSTRG.16092.3  | 1.62332   | coding    |
| MSTRG.16093.3  | 0.802151  | coding    |
| MSTRG.16104.1  | 1.30622   | coding    |
| MSTRG.16104.4  | 1.77987   | coding    |
| MSTRG.16104.5  | 1.388     | coding    |
| MSTRG.16102.1  | 0.613005  | coding    |
| MSTRG.16109.4  | 1.26799   | coding    |
| MSTRG.16110.1  | -0.317779 | noncoding |
| MSTRG.16113.5  | 1.48524   | coding    |
| MSTRG.16113.6  | 1.3905    | coding    |
| MSTRG.16113.8  | 1.38433   | coding    |
| MSTRG.16113.7  | 1.46882   | coding    |
| MSTRG.16113.9  | 1.31294   | coding    |
| MSTRG.16113.11 | 1.32147   | coding    |
| MSTRG.16113.12 | 0.598514  | coding    |
| MSTRG.16113.13 | 0.521608  | coding    |
| MSTRG.16113.14 | 0.604658  | coding    |
| MSTRG.16117.2  | 2.16571   | coding    |
| MSTRG.16117.3  | 1.46484   | coding    |
| MSTRG.16118.1  | -1.29928  | noncoding |
| MSTRG.16123.1  | 0.057737  | coding    |
| MSTRG.16128.1  | 1.59983   | coding    |
| MSTRG.16128.5  | 1.69643   | coding    |
| MSTRG.16128.6  | 1.72292   | coding    |
| MSTRG.16129.1  | 0.180882  | coding    |
| MSTRG.16129.2  | 0.282063  | coding    |
| MSTRG.16129.3  | -0.182426 | noncoding |
| MSTRG.16132.2  | 1.00265   | coding    |
| MSTRG.16132.3  | 0.378191  | coding    |
| MSTRG.16133.1  | 0.579662  | coding    |
| MSTRG.16133.2  | 0.840445  | coding    |



|                |           |           |
|----------------|-----------|-----------|
| MSTRG. 16133.4 | 1.28854   | coding    |
| MSTRG. 16136.1 | 1.11297   | coding    |
| MSTRG. 16136.2 | 1.0556    | coding    |
| MSTRG. 16138.2 | 1.13293   | coding    |
| MSTRG. 16138.5 | 1.13579   | coding    |
| MSTRG. 16138.6 | 1.64924   | coding    |
| MSTRG. 16144.1 | -0.251395 | noncoding |
| MSTRG. 16144.4 | 0.564461  | coding    |
| MSTRG. 16148.2 | 2.26028   | coding    |
| MSTRG. 16148.5 | 2.28557   | coding    |
| MSTRG. 16149.1 | 0.391159  | coding    |
| MSTRG. 16159.1 | 0.665733  | coding    |
| MSTRG. 16159.2 | 0.783356  | coding    |
| MSTRG. 16159.3 | 1.11384   | coding    |
| MSTRG. 16159.4 | 1.09465   | coding    |
| MSTRG. 16159.5 | 1.30946   | coding    |
| MSTRG. 16162.1 | 1.56263   | coding    |
| MSTRG. 16163.5 | 0.988947  | coding    |
| MSTRG. 16167.2 | 0.934496  | coding    |
| MSTRG. 16170.5 | 1.40025   | coding    |
| MSTRG. 16174.2 | 1.12801   | coding    |
| MSTRG. 16191.3 | 2.08659   | coding    |
| MSTRG. 16191.4 | 1.99171   | coding    |
| MSTRG. 16191.5 | 1.2678    | coding    |
| MSTRG. 16182.2 | 0.623508  | coding    |
| MSTRG. 16196.2 | 2.78948   | coding    |
| MSTRG. 16198.1 | 2.59518   | coding    |
| MSTRG. 16198.2 | 2.53891   | coding    |
| MSTRG. 16199.1 | -1.26953  | noncoding |
| MSTRG. 16195.3 | 0.959399  | coding    |
| MSTRG. 16201.2 | 1.05991   | coding    |
| MSTRG. 16201.3 | 1.18504   | coding    |
| MSTRG. 16201.6 | 1.28332   | coding    |
| MSTRG. 16202.1 | -0.01645  | noncoding |
| MSTRG. 16201.7 | 1.3011    | coding    |
| MSTRG. 16203.1 | 2.65246   | coding    |
| MSTRG. 16207.1 | 0.385126  | coding    |
| MSTRG. 16210.2 | -0.452964 | noncoding |
| MSTRG. 16211.1 | 2.09743   | coding    |
| MSTRG. 16214.2 | -1.18571  | noncoding |
| MSTRG. 16214.3 | -1.03002  | noncoding |
| MSTRG. 16215.1 | -1.49708  | noncoding |
| MSTRG. 16217.1 | 2.54693   | coding    |
| MSTRG. 16218.3 | 1.58911   | coding    |
| MSTRG. 16218.4 | 1.6166    | coding    |
| MSTRG. 16221.4 | 1.63657   | coding    |
| MSTRG. 16221.3 | 1.59829   | coding    |
| MSTRG. 16222.1 | 0.468418  | coding    |
| MSTRG. 16222.3 | 0.088106  | coding    |
| MSTRG. 16219.1 | -2.06848  | noncoding |
| MSTRG. 16226.5 | 0.259413  | coding    |
| MSTRG. 16239.3 | 1.25152   | coding    |
| MSTRG. 16239.4 | 1.45058   | coding    |
| MSTRG. 16244.1 | 0.41903   | coding    |

|                |           |           |
|----------------|-----------|-----------|
| MSTRG.16244.3  | 0.942278  | coding    |
| MSTRG.16244.5  | 1.47681   | coding    |
| MSTRG.16242.7  | -0.970139 | noncoding |
| MSTRG.16233.1  | 0.989557  | coding    |
| MSTRG.16233.2  | -0.263433 | noncoding |
| MSTRG.16248.2  | 2.45457   | coding    |
| MSTRG.16248.3  | 2.57566   | coding    |
| MSTRG.16237.1  | -0.568165 | noncoding |
| MSTRG.16252.3  | -0.750186 | noncoding |
| MSTRG.16252.4  | -0.714172 | noncoding |
| MSTRG.16252.1  | -0.362533 | noncoding |
| MSTRG.16253.2  | 0.646438  | coding    |
| MSTRG.16253.6  | 0.71582   | coding    |
| MSTRG.16253.7  | 0.851324  | coding    |
| MSTRG.16254.1  | 2.06298   | coding    |
| MSTRG.16261.2  | 2.2699    | coding    |
| MSTRG.16261.6  | 2.32922   | coding    |
| MSTRG.16261.5  | 2.60836   | coding    |
| MSTRG.16263.5  | 0.778327  | coding    |
| MSTRG.16263.3  | 1.38474   | coding    |
| MSTRG.16263.4  | 1.63072   | coding    |
| MSTRG.16263.2  | 1.5861    | coding    |
| MSTRG.16258.1  | -0.024123 | noncoding |
| MSTRG.16258.2  | 0.014734  | coding    |
| MSTRG.16264.6  | 1.51033   | coding    |
| MSTRG.16265.1  | -1.50221  | noncoding |
| MSTRG.16264.10 | 1.1628    | coding    |
| MSTRG.16264.9  | 1.9555    | coding    |
| MSTRG.16264.11 | -1.81563  | noncoding |
| MSTRG.16269.1  | -0.831453 | noncoding |
| MSTRG.16269.2  | -0.751131 | noncoding |
| MSTRG.16269.3  | -0.981106 | noncoding |
| MSTRG.16270.1  | 2.13164   | coding    |
| MSTRG.16270.2  | 2.11943   | coding    |
| MSTRG.16270.3  | 1.5791    | coding    |
| MSTRG.16273.1  | -2.74166  | noncoding |
| MSTRG.16274.2  | 1.91092   | coding    |
| MSTRG.16275.1  | -1.8119   | noncoding |
| MSTRG.16276.1  | 0.175898  | coding    |
| MSTRG.16278.2  | 0.058973  | coding    |
| MSTRG.16284.1  | -2.30413  | noncoding |
| MSTRG.16288.1  | 0.08111   | coding    |
| MSTRG.16291.1  | -1.34282  | noncoding |
| MSTRG.16296.1  | -1.17949  | noncoding |
| MSTRG.16299.1  | -2.12231  | noncoding |
| MSTRG.16299.2  | -2.02756  | noncoding |
| MSTRG.16302.1  | -0.740138 | noncoding |
| MSTRG.16307.1  | -1.02368  | noncoding |
| MSTRG.16319.2  | 1.29123   | coding    |
| MSTRG.16319.3  | 1.84632   | coding    |
| MSTRG.16319.4  | 1.8786    | coding    |
| MSTRG.16319.5  | 1.83109   | coding    |
| MSTRG.16319.6  | 1.98864   | coding    |
| MSTRG.16320.2  | -0.15921  | noncoding |

|                  |            |           |
|------------------|------------|-----------|
| MSTRG. 16321. 1  | 2. 16962   | coding    |
| MSTRG. 16326. 1  | 2. 34271   | coding    |
| MSTRG. 16327. 1  | 2. 22354   | coding    |
| MSTRG. 16328. 1  | -1. 63793  | noncoding |
| MSTRG. 16329. 3  | 2. 1834    | coding    |
| MSTRG. 16329. 4  | 0. 645604  | coding    |
| MSTRG. 16330. 2  | 2. 15294   | coding    |
| MSTRG. 16332. 1  | 2. 65992   | coding    |
| MSTRG. 16334. 5  | 1. 99867   | coding    |
| MSTRG. 16336. 1  | -2. 38844  | noncoding |
| MSTRG. 16337. 1  | -0. 710291 | noncoding |
| MSTRG. 16339. 2  | 0. 826976  | coding    |
| MSTRG. 16349. 1  | 0. 360028  | coding    |
| MSTRG. 16345. 2  | 0. 546319  | coding    |
| MSTRG. 16345. 3  | 0. 101354  | coding    |
| MSTRG. 16343. 1  | -1. 9165   | noncoding |
| MSTRG. 16340. 1  | -1. 51266  | noncoding |
| MSTRG. 16351. 1  | 0. 402617  | coding    |
| MSTRG. 16351. 2  | 0. 553642  | coding    |
| MSTRG. 16352. 4  | 0. 080557  | coding    |
| MSTRG. 16353. 1  | 0. 703641  | coding    |
| MSTRG. 16354. 1  | -0. 843335 | noncoding |
| MSTRG. 16358. 2  | 1. 58559   | coding    |
| MSTRG. 16358. 3  | 1. 20183   | coding    |
| MSTRG. 16361. 2  | 1. 70259   | coding    |
| MSTRG. 16361. 1  | 1. 13508   | coding    |
| MSTRG. 16361. 3  | 1. 42324   | coding    |
| MSTRG. 16361. 5  | 0. 344555  | coding    |
| MSTRG. 16361. 6  | 0. 295719  | coding    |
| MSTRG. 16361. 7  | -0. 086413 | noncoding |
| MSTRG. 16364. 2  | 2. 28119   | coding    |
| MSTRG. 16366. 1  | 0. 658431  | coding    |
| MSTRG. 16369. 4  | -0. 430175 | noncoding |
| MSTRG. 16370. 1  | -1. 04332  | noncoding |
| MSTRG. 16370. 2  | -1. 16987  | noncoding |
| MSTRG. 16375. 3  | 2. 00228   | coding    |
| MSTRG. 16378. 1  | -2. 22535  | noncoding |
| MSTRG. 16388. 1  | -0. 109228 | noncoding |
| MSTRG. 16389. 1  | 0. 497076  | coding    |
| MSTRG. 16389. 2  | 0. 20451   | coding    |
| MSTRG. 16388. 2  | -1. 14729  | noncoding |
| MSTRG. 16397. 3  | 1. 5601    | coding    |
| MSTRG. 16399. 2  | 0. 378207  | coding    |
| MSTRG. 16410. 1  | -2. 09504  | noncoding |
| MSTRG. 16418. 1  | -1. 16808  | noncoding |
| MSTRG. 16419. 6  | 0. 577679  | coding    |
| MSTRG. 16419. 5  | 0. 694598  | coding    |
| MSTRG. 16419. 7  | 1. 54954   | coding    |
| MSTRG. 16419. 8  | 1. 52303   | coding    |
| MSTRG. 16419. 10 | 1. 74094   | coding    |
| MSTRG. 16422. 1  | 2. 37337   | coding    |
| MSTRG. 16422. 2  | 2. 08943   | coding    |
| MSTRG. 16422. 3  | 2. 12598   | coding    |
| MSTRG. 16422. 6  | 1. 75516   | coding    |

|                  |            |           |
|------------------|------------|-----------|
| MSTRG. 16423. 4  | 1. 42634   | coding    |
| MSTRG. 16423. 2  | 2. 24202   | coding    |
| MSTRG. 16423. 3  | 2. 06189   | coding    |
| MSTRG. 16423. 5  | 1. 13684   | coding    |
| MSTRG. 16423. 7  | 2. 32123   | coding    |
| MSTRG. 16423. 8  | 1. 77393   | coding    |
| MSTRG. 16423. 10 | 0. 296651  | coding    |
| MSTRG. 16423. 12 | -0. 640904 | noncoding |
| MSTRG. 16425. 2  | 0. 179738  | coding    |
| MSTRG. 16425. 1  | 0. 720457  | coding    |
| MSTRG. 16425. 3  | 1. 29478   | coding    |
| MSTRG. 16425. 9  | 2. 22868   | coding    |
| MSTRG. 16425. 10 | 0. 664515  | coding    |
| MSTRG. 16427. 1  | -1. 55922  | noncoding |
| MSTRG. 16417. 1  | -0. 81785  | noncoding |
| MSTRG. 16429. 2  | -2. 14394  | noncoding |
| MSTRG. 16431. 3  | 0. 659614  | coding    |
| MSTRG. 16431. 4  | 0. 715227  | coding    |
| MSTRG. 16470. 1  | 0. 688833  | coding    |
| MSTRG. 16472. 1  | -0. 127626 | noncoding |
| MSTRG. 16473. 2  | -0. 64808  | noncoding |
| MSTRG. 16446. 1  | -2. 02568  | noncoding |
| MSTRG. 16448. 5  | 1. 46868   | coding    |
| MSTRG. 16448. 6  | 0. 3015    | coding    |
| MSTRG. 16448. 2  | 1. 258     | coding    |
| MSTRG. 16448. 4  | 1. 22463   | coding    |
| MSTRG. 16448. 8  | 0. 839289  | coding    |
| MSTRG. 16448. 9  | 0. 848782  | coding    |
| MSTRG. 16452. 3  | 1. 86497   | coding    |
| MSTRG. 16452. 5  | 1. 74058   | coding    |
| MSTRG. 16452. 6  | 1. 77734   | coding    |
| MSTRG. 16453. 2  | 2. 36389   | coding    |
| MSTRG. 16457. 1  | 3. 02673   | coding    |
| MSTRG. 16461. 2  | -0. 161518 | noncoding |
| MSTRG. 16463. 2  | 2. 41691   | coding    |
| MSTRG. 16463. 3  | 3. 15951   | coding    |
| MSTRG. 16463. 4  | 3. 18617   | coding    |
| MSTRG. 16464. 1  | 0. 637161  | coding    |
| MSTRG. 16465. 1  | -0. 49299  | noncoding |
| MSTRG. 16482. 1  | -2. 31984  | noncoding |
| MSTRG. 16484. 1  | 1. 94039   | coding    |
| MSTRG. 16486. 2  | 0. 862985  | coding    |
| MSTRG. 16486. 3  | 1. 1436    | coding    |
| MSTRG. 16491. 1  | 0. 872204  | coding    |
| MSTRG. 16492. 1  | -1. 23142  | noncoding |
| MSTRG. 16492. 2  | 0. 363946  | coding    |
| MSTRG. 16498. 7  | 1. 6086    | coding    |
| MSTRG. 16498. 8  | 1. 68968   | coding    |
| MSTRG. 16498. 13 | 2. 13031   | coding    |
| MSTRG. 16498. 14 | 2. 04786   | coding    |
| MSTRG. 16498. 15 | 1. 2824    | coding    |
| MSTRG. 16498. 16 | -1. 1963   | noncoding |
| MSTRG. 16502. 2  | 0. 546661  | coding    |
| MSTRG. 16507. 1  | -2. 41421  | noncoding |

|               |           |           |
|---------------|-----------|-----------|
| MSTRG.16511.1 | 0.739701  | coding    |
| MSTRG.16511.2 | 0.728762  | coding    |
| MSTRG.16511.7 | 0.740608  | coding    |
| MSTRG.16514.1 | 1.7454    | coding    |
| MSTRG.16514.2 | 1.91913   | coding    |
| MSTRG.16515.3 | 1.47016   | coding    |
| MSTRG.16539.4 | 2.19142   | coding    |
| MSTRG.16539.5 | 2.81276   | coding    |
| MSTRG.16539.2 | 2.94879   | coding    |
| MSTRG.16539.6 | 3.23293   | coding    |
| MSTRG.16539.7 | 2.22138   | coding    |
| MSTRG.16542.1 | -1.20459  | noncoding |
| MSTRG.16539.8 | 1.95319   | coding    |
| MSTRG.16565.1 | -0.629258 | noncoding |
| MSTRG.16584.1 | -0.537765 | noncoding |
| MSTRG.16584.2 | -0.318468 | noncoding |
| MSTRG.16516.1 | 1.3925    | coding    |
| MSTRG.16520.1 | 0.267821  | coding    |
| MSTRG.16535.6 | 1.25079   | coding    |
| MSTRG.16535.7 | 1.05313   | coding    |
| MSTRG.16537.1 | 0.212353  | coding    |
| MSTRG.16590.2 | 2.45649   | coding    |
| MSTRG.16590.4 | 1.21715   | coding    |
| MSTRG.16590.3 | 2.47924   | coding    |
| MSTRG.16590.6 | -0.07496  | noncoding |
| MSTRG.16597.2 | 3.08138   | coding    |
| MSTRG.16597.3 | -0.030337 | noncoding |
| MSTRG.16597.4 | -0.09191  | noncoding |
| MSTRG.16597.5 | -0.818397 | noncoding |
| MSTRG.16597.6 | 0.503555  | coding    |
| MSTRG.16613.1 | -1.17423  | noncoding |
| MSTRG.16616.1 | 0.853885  | coding    |
| MSTRG.16616.2 | 0.597927  | coding    |
| MSTRG.16616.3 | 0.423984  | coding    |
| MSTRG.16619.1 | -0.916253 | noncoding |
| MSTRG.16620.1 | 0.030328  | coding    |
| MSTRG.16616.5 | 0.91762   | coding    |
| MSTRG.16616.6 | 0.283827  | coding    |
| MSTRG.16616.7 | 1.767     | coding    |
| MSTRG.16616.8 | 1.02283   | coding    |
| MSTRG.16620.2 | 0.415804  | coding    |
| MSTRG.16620.3 | 0.015308  | coding    |
| MSTRG.16620.4 | 0.007334  | coding    |
| MSTRG.16620.5 | 0.140242  | coding    |
| MSTRG.16620.6 | 0.099062  | coding    |
| MSTRG.16622.1 | -1.01212  | noncoding |
| MSTRG.16587.1 | -1.78697  | noncoding |
| MSTRG.16601.1 | -0.72305  | noncoding |
| MSTRG.16602.1 | -0.521549 | noncoding |
| MSTRG.16603.3 | 0.273028  | coding    |
| MSTRG.16603.4 | 0.822689  | coding    |
| MSTRG.16604.2 | 2.72316   | coding    |
| MSTRG.16629.2 | 2.49112   | coding    |
| MSTRG.16629.3 | 1.56749   | coding    |

|                |           |           |
|----------------|-----------|-----------|
| MSTRG.16630.1  | 0.052976  | coding    |
| MSTRG.16631.3  | 0.122967  | coding    |
| MSTRG.16629.4  | 1.97036   | coding    |
| MSTRG.16629.5  | 1.90345   | coding    |
| MSTRG.16632.1  | -2.64024  | noncoding |
| MSTRG.16642.1  | 0.91347   | coding    |
| MSTRG.16642.2  | 0.872238  | coding    |
| MSTRG.16644.1  | 1.41151   | coding    |
| MSTRG.16645.2  | -0.854303 | noncoding |
| MSTRG.16653.5  | 1.80528   | coding    |
| MSTRG.16653.6  | 1.80149   | coding    |
| MSTRG.16653.7  | 1.57964   | coding    |
| MSTRG.16653.8  | 1.63736   | coding    |
| MSTRG.16653.9  | 1.82549   | coding    |
| MSTRG.16653.10 | -0.038097 | noncoding |
| MSTRG.16654.1  | -0.881267 | noncoding |
| MSTRG.16652.1  | 2.47474   | coding    |
| MSTRG.16660.1  | -0.094668 | noncoding |
| MSTRG.16660.3  | -0.212298 | noncoding |
| MSTRG.16660.4  | -0.105387 | noncoding |
| MSTRG.16660.5  | 0.019434  | coding    |
| MSTRG.16665.3  | 1.21598   | coding    |
| MSTRG.16665.4  | 1.32604   | coding    |
| MSTRG.16671.5  | 0.092641  | coding    |
| MSTRG.16672.2  | 0.215651  | coding    |
| MSTRG.16672.5  | 0.897539  | coding    |
| MSTRG.16672.7  | 0.481522  | coding    |
| MSTRG.16669.1  | -0.311804 | noncoding |
| MSTRG.16669.2  | 0.005688  | coding    |
| MSTRG.16670.1  | 1.93319   | coding    |
| MSTRG.16674.1  | -0.562343 | noncoding |
| MSTRG.16676.1  | 1.70237   | coding    |
| MSTRG.16676.3  | 2.06112   | coding    |
| MSTRG.16677.4  | 2.36872   | coding    |
| MSTRG.16677.3  | 1.46639   | coding    |
| MSTRG.16678.1  | -1.84116  | noncoding |
| MSTRG.16679.2  | 0.122794  | coding    |
| MSTRG.16679.1  | -0.34728  | noncoding |
| MSTRG.16679.3  | 0.244942  | coding    |
| MSTRG.16679.4  | -0.549668 | noncoding |
| MSTRG.16679.5  | -0.252152 | noncoding |
| MSTRG.16685.2  | 1.88374   | coding    |
| MSTRG.16687.1  | -2.70688  | noncoding |
| MSTRG.16684.1  | -1.15278  | noncoding |
| MSTRG.16691.1  | -0.660237 | noncoding |
| MSTRG.16694.5  | 0.300238  | coding    |
| MSTRG.16692.1  | -1.53263  | noncoding |
| MSTRG.16693.1  | -1.81231  | noncoding |
| MSTRG.16702.1  | 0.553627  | coding    |
| MSTRG.16702.4  | 2.03256   | coding    |
| MSTRG.16702.5  | -1.51533  | noncoding |
| MSTRG.16704.3  | -1.10443  | noncoding |
| MSTRG.16702.10 | 2.47091   | coding    |
| MSTRG.16702.12 | 1.95577   | coding    |

|                  |            |           |
|------------------|------------|-----------|
| MSTRG. 16702. 13 | 1. 65857   | coding    |
| MSTRG. 16709. 4  | 2. 03806   | coding    |
| MSTRG. 16709. 7  | 1. 17372   | coding    |
| MSTRG. 16696. 4  | 0. 527786  | coding    |
| MSTRG. 16712. 1  | 1. 98728   | coding    |
| MSTRG. 16712. 2  | 1. 90329   | coding    |
| MSTRG. 16712. 3  | 2. 19742   | coding    |
| MSTRG. 16712. 5  | 1. 36543   | coding    |
| MSTRG. 16712. 4  | 2. 29107   | coding    |
| MSTRG. 16712. 6  | 2. 08716   | coding    |
| MSTRG. 16712. 7  | 2. 32024   | coding    |
| MSTRG. 16712. 8  | 2. 27395   | coding    |
| MSTRG. 16712. 9  | 1. 77037   | coding    |
| MSTRG. 16712. 10 | 1. 90169   | coding    |
| MSTRG. 16712. 11 | 0. 477681  | coding    |
| MSTRG. 16713. 1  | 1. 23315   | coding    |
| MSTRG. 16713. 2  | 2. 06157   | coding    |
| MSTRG. 16713. 4  | 0. 189727  | coding    |
| MSTRG. 16713. 11 | 1. 83122   | coding    |
| MSTRG. 16719. 2  | 1. 77894   | coding    |
| MSTRG. 16722. 1  | 1. 85789   | coding    |
| MSTRG. 16722. 2  | 2. 20337   | coding    |
| MSTRG. 16722. 3  | 1. 99105   | coding    |
| MSTRG. 16722. 5  | 1. 26401   | coding    |
| MSTRG. 16722. 6  | 0. 710934  | coding    |
| MSTRG. 16726. 1  | -1. 00075  | noncoding |
| MSTRG. 16733. 1  | -0. 404642 | noncoding |
| MSTRG. 16733. 3  | -0. 133937 | noncoding |
| MSTRG. 16745. 1  | -2. 29686  | noncoding |
| MSTRG. 16747. 1  | -2. 35166  | noncoding |
| MSTRG. 16754. 2  | 1. 05842   | coding    |
| MSTRG. 16757. 3  | 2. 04795   | coding    |
| MSTRG. 16757. 4  | 2. 13116   | coding    |
| MSTRG. 16748. 2  | 0. 948825  | coding    |
| MSTRG. 16749. 1  | -2. 22357  | noncoding |
| MSTRG. 16749. 2  | -1. 97804  | noncoding |
| MSTRG. 16750. 1  | -2. 15663  | noncoding |
| MSTRG. 16761. 3  | -0. 896027 | noncoding |
| MSTRG. 16764. 2  | 1. 18697   | coding    |
| MSTRG. 16765. 1  | -0. 254488 | noncoding |
| MSTRG. 16766. 1  | -0. 315962 | noncoding |
| MSTRG. 16767. 1  | 0. 674286  | coding    |
| MSTRG. 16769. 1  | -0. 06077  | noncoding |
| MSTRG. 16772. 2  | 2. 38556   | coding    |
| MSTRG. 16772. 3  | 2. 15502   | coding    |
| MSTRG. 16772. 4  | 2. 28273   | coding    |
| MSTRG. 16772. 5  | 2. 43738   | coding    |
| MSTRG. 16776. 1  | -3. 16791  | noncoding |
| MSTRG. 16799. 10 | 2. 13115   | coding    |
| MSTRG. 16799. 7  | 2. 14503   | coding    |
| MSTRG. 16799. 8  | 1. 99579   | coding    |
| MSTRG. 16799. 9  | 2. 18123   | coding    |
| MSTRG. 16799. 3  | 2. 19292   | coding    |
| MSTRG. 16799. 2  | 2. 56187   | coding    |

|                  |            |           |
|------------------|------------|-----------|
| MSTRG. 16799. 11 | 2. 70021   | coding    |
| MSTRG. 16799. 4  | 2. 7339    | coding    |
| MSTRG. 16799. 5  | 2. 72915   | coding    |
| MSTRG. 16799. 1  | 2. 676     | coding    |
| MSTRG. 16801. 1  | -1. 30885  | noncoding |
| MSTRG. 16799. 12 | 0. 444043  | coding    |
| MSTRG. 16799. 13 | 1. 76614   | coding    |
| MSTRG. 16802. 1  | 0. 1739    | coding    |
| MSTRG. 16803. 1  | -1. 76412  | noncoding |
| MSTRG. 16780. 1  | -2. 37669  | noncoding |
| MSTRG. 16784. 2  | 0. 785913  | coding    |
| MSTRG. 16785. 1  | -2. 162    | noncoding |
| MSTRG. 16787. 1  | -2. 12398  | noncoding |
| MSTRG. 16789. 1  | -2. 2165   | noncoding |
| MSTRG. 16823. 10 | 1. 93381   | coding    |
| MSTRG. 16823. 8  | 1. 93052   | coding    |
| MSTRG. 16823. 1  | 2. 48303   | coding    |
| MSTRG. 16823. 5  | 2. 45106   | coding    |
| MSTRG. 16823. 6  | 2. 4361    | coding    |
| MSTRG. 16823. 7  | 2. 48852   | coding    |
| MSTRG. 16823. 9  | 2. 19659   | coding    |
| MSTRG. 16823. 2  | 2. 43947   | coding    |
| MSTRG. 16823. 3  | 2. 44563   | coding    |
| MSTRG. 16823. 11 | 2. 23566   | coding    |
| MSTRG. 16823. 12 | -0. 698951 | noncoding |
| MSTRG. 16824. 1  | -1. 56989  | noncoding |
| MSTRG. 16824. 2  | -1. 35179  | noncoding |
| MSTRG. 16824. 3  | -1. 00197  | noncoding |
| MSTRG. 16816. 2  | 1. 50219   | coding    |
| MSTRG. 16816. 3  | 1. 62895   | coding    |
| MSTRG. 16817. 1  | -1. 34879  | noncoding |
| MSTRG. 16818. 1  | 0. 037324  | coding    |
| MSTRG. 16818. 2  | -2. 31262  | noncoding |
| MSTRG. 16820. 1  | -1. 41545  | noncoding |
| MSTRG. 16835. 1  | -2. 33424  | noncoding |
| MSTRG. 16835. 2  | -2. 19896  | noncoding |
| MSTRG. 16840. 1  | 1. 05322   | coding    |
| MSTRG. 16847. 1  | -1. 24601  | noncoding |
| MSTRG. 16847. 2  | -1. 96882  | noncoding |
| MSTRG. 16855. 1  | -1. 54843  | noncoding |
| MSTRG. 16878. 1  | -2. 50609  | noncoding |
| MSTRG. 16879. 1  | -1. 47519  | noncoding |
| MSTRG. 16884. 1  | -2. 08638  | noncoding |
| MSTRG. 17027. 1  | 1. 74783   | coding    |
| MSTRG. 17027. 4  | 1. 03923   | coding    |
| MSTRG. 17027. 5  | 1. 09932   | coding    |
| MSTRG. 17027. 3  | 1. 48525   | coding    |
| MSTRG. 17027. 6  | 0. 973804  | coding    |
| MSTRG. 17028. 1  | 1. 12017   | coding    |
| MSTRG. 17027. 8  | 0. 779299  | coding    |
| MSTRG. 17027. 12 | 0. 716526  | coding    |
| MSTRG. 17027. 13 | 0. 787544  | coding    |
| MSTRG. 17027. 20 | 0. 148579  | coding    |
| MSTRG. 17027. 16 | 0. 887922  | coding    |



|                  |            |           |
|------------------|------------|-----------|
| MSTRG. 17027. 17 | 0. 04174   | coding    |
| MSTRG. 17027. 21 | 1. 0188    | coding    |
| MSTRG. 17027. 22 | 0. 305962  | coding    |
| MSTRG. 17027. 23 | -0. 450842 | noncoding |
| MSTRG. 17031. 1  | 0. 588099  | coding    |
| MSTRG. 17027. 24 | 0. 956864  | coding    |
| MSTRG. 17027. 25 | 1. 72982   | coding    |
| MSTRG. 17027. 26 | 0. 557783  | coding    |
| MSTRG. 17027. 27 | 0. 886527  | coding    |
| MSTRG. 17027. 28 | 0. 234006  | coding    |
| MSTRG. 17033. 1  | -0. 838596 | noncoding |
| MSTRG. 17027. 29 | -0. 051422 | noncoding |
| MSTRG. 17027. 30 | -0. 226524 | noncoding |
| MSTRG. 17034. 1  | -0. 202917 | noncoding |
| MSTRG. 17035. 1  | -1. 00568  | noncoding |
| MSTRG. 17036. 1  | -0. 022257 | noncoding |
| MSTRG. 17037. 1  | -1. 30722  | noncoding |
| MSTRG. 17038. 1  | 0. 415622  | coding    |
| MSTRG. 17039. 1  | -0. 747651 | noncoding |
| MSTRG. 17040. 1  | -0. 54971  | noncoding |
| MSTRG. 17041. 1  | 0. 674928  | coding    |
| MSTRG. 17042. 1  | -0. 929674 | noncoding |
| MSTRG. 17042. 2  | -0. 36494  | noncoding |
| MSTRG. 17027. 31 | 0. 262469  | coding    |
| MSTRG. 17027. 32 | 0. 411881  | coding    |
| MSTRG. 17027. 34 | 0. 688113  | coding    |
| MSTRG. 17027. 33 | 0. 719252  | coding    |
| MSTRG. 17027. 35 | -1. 37716  | noncoding |
| MSTRG. 17027. 37 | 0. 635711  | coding    |
| MSTRG. 17027. 36 | 0. 700264  | coding    |
| MSTRG. 17027. 38 | 0. 820232  | coding    |
| MSTRG. 17027. 40 | 0. 636413  | coding    |
| MSTRG. 17027. 39 | 0. 600351  | coding    |
| MSTRG. 17027. 41 | 0. 310533  | coding    |
| MSTRG. 17027. 42 | 0. 662102  | coding    |
| MSTRG. 17027. 43 | 0. 182456  | coding    |
| MSTRG. 17027. 44 | -0. 59804  | noncoding |
| MSTRG. 17044. 1  | -0. 972796 | noncoding |
| MSTRG. 17027. 45 | -0. 1163   | noncoding |
| MSTRG. 17027. 46 | 0. 628328  | coding    |
| MSTRG. 17045. 1  | -0. 596851 | noncoding |
| MSTRG. 17046. 1  | -1. 19392  | noncoding |
| MSTRG. 17047. 1  | 0. 46902   | coding    |
| MSTRG. 17048. 1  | 0. 048031  | coding    |
| MSTRG. 17049. 1  | -0. 284376 | noncoding |
| MSTRG. 17050. 1  | 0. 314449  | coding    |
| MSTRG. 17051. 1  | -0. 554025 | noncoding |
| MSTRG. 16890. 1  | 0. 61673   | coding    |
| MSTRG. 16890. 2  | 0. 324662  | coding    |
| MSTRG. 16899. 2  | 2. 3863    | coding    |
| MSTRG. 16906. 1  | 1. 92546   | coding    |
| MSTRG. 16906. 3  | -0. 112736 | noncoding |
| MSTRG. 16907. 3  | -0. 556725 | noncoding |
| MSTRG. 16907. 1  | 0. 695285  | coding    |

|               |           |           |
|---------------|-----------|-----------|
| MSTRG.16907.2 | -1.04942  | noncoding |
| MSTRG.16907.4 | -1.00512  | noncoding |
| MSTRG.16907.5 | -0.667049 | noncoding |
| MSTRG.16907.6 | 0.676467  | coding    |
| MSTRG.16907.8 | 0.787881  | coding    |
| MSTRG.16907.7 | -0.866641 | noncoding |
| MSTRG.16907.9 | 0.138307  | coding    |
| MSTRG.16911.1 | -1.874    | noncoding |
| MSTRG.16912.1 | 0.338499  | coding    |
| MSTRG.16915.1 | 2.05018   | coding    |
| MSTRG.16918.2 | -0.673792 | noncoding |
| MSTRG.16918.1 | -1.40583  | noncoding |
| MSTRG.16912.2 | 1.26052   | coding    |
| MSTRG.16912.3 | 1.4533    | coding    |
| MSTRG.16902.3 | -0.184893 | noncoding |
| MSTRG.16902.4 | -0.079981 | noncoding |
| MSTRG.16919.1 | -2.38251  | noncoding |
| MSTRG.16920.1 | -0.470248 | noncoding |
| MSTRG.16922.1 | -1.04856  | noncoding |
| MSTRG.16930.6 | 1.76521   | coding    |
| MSTRG.16927.1 | 1.04596   | coding    |
| MSTRG.16928.1 | -1.60185  | noncoding |
| MSTRG.16935.7 | 0.683543  | coding    |
| MSTRG.16936.1 | 0.172694  | coding    |
| MSTRG.16935.8 | 1.18716   | coding    |
| MSTRG.16938.1 | 0.019759  | coding    |
| MSTRG.16940.1 | 2.43471   | coding    |
| MSTRG.16940.2 | 2.50414   | coding    |
| MSTRG.16940.3 | 2.773     | coding    |
| MSTRG.16940.4 | 1.78192   | coding    |
| MSTRG.16945.1 | 2.0046    | coding    |
| MSTRG.16948.1 | 0.314885  | coding    |
| MSTRG.16949.2 | 0.506979  | coding    |
| MSTRG.16953.4 | 2.85864   | coding    |
| MSTRG.16954.1 | -0.55541  | noncoding |
| MSTRG.16959.1 | 1.42894   | coding    |
| MSTRG.16959.2 | 1.26119   | coding    |
| MSTRG.16961.1 | -0.312529 | noncoding |
| MSTRG.16962.1 | -1.74856  | noncoding |
| MSTRG.16965.1 | 1.00445   | coding    |
| MSTRG.16965.2 | 0.807489  | coding    |
| MSTRG.16965.4 | 0.302524  | coding    |
| MSTRG.16965.3 | 0.788749  | coding    |
| MSTRG.16965.5 | 1.1102    | coding    |
| MSTRG.16965.6 | 0.721494  | coding    |
| MSTRG.16965.7 | -0.632828 | noncoding |
| MSTRG.16966.1 | 0.719638  | coding    |
| MSTRG.16966.2 | 0.409043  | coding    |
| MSTRG.16967.1 | -2.32799  | noncoding |
| MSTRG.16968.1 | -1.24798  | noncoding |
| MSTRG.16963.5 | -1.7324   | noncoding |
| MSTRG.16971.1 | 1.87373   | coding    |
| MSTRG.16971.2 | 1.82784   | coding    |
| MSTRG.16971.3 | 2.26389   | coding    |

|                 |           |           |
|-----------------|-----------|-----------|
| MSTRG. 16971.4  | 2.30068   | coding    |
| MSTRG. 16971.6  | 1.83863   | coding    |
| MSTRG. 16971.8  | 1.71085   | coding    |
| MSTRG. 16971.10 | 1.67992   | coding    |
| MSTRG. 16971.9  | 1.95524   | coding    |
| MSTRG. 16973.1  | -0.808201 | noncoding |
| MSTRG. 16974.2  | 0.570417  | coding    |
| MSTRG. 16974.3  | 0.299327  | coding    |
| MSTRG. 16978.1  | 2.64305   | coding    |
| MSTRG. 16978.2  | 3.58001   | coding    |
| MSTRG. 16978.3  | 3.40447   | coding    |
| MSTRG. 16978.4  | 3.37229   | coding    |
| MSTRG. 16988.6  | 1.09177   | coding    |
| MSTRG. 16988.4  | 0.940611  | coding    |
| MSTRG. 16988.5  | 0.964564  | coding    |
| MSTRG. 16988.3  | 0.982623  | coding    |
| MSTRG. 16988.9  | 0.423658  | coding    |
| MSTRG. 16992.2  | 0.379402  | coding    |
| MSTRG. 16996.1  | -1.79805  | noncoding |
| MSTRG. 16997.1  | -0.976658 | noncoding |
| MSTRG. 16997.2  | -2.02393  | noncoding |
| MSTRG. 16998.1  | -0.779282 | noncoding |
| MSTRG. 16999.1  | -0.723642 | noncoding |
| MSTRG. 17005.1  | -1.32154  | noncoding |
| MSTRG. 17004.6  | -1.62604  | noncoding |
| MSTRG. 17004.7  | -0.494596 | noncoding |
| MSTRG. 17004.8  | -0.965179 | noncoding |
| MSTRG. 17008.1  | -1.92359  | noncoding |
| MSTRG. 17011.2  | 2.4253    | coding    |
| MSTRG. 17011.3  | 1.57071   | coding    |
| MSTRG. 17011.5  | 0.092705  | coding    |
| MSTRG. 17012.1  | 0.177342  | coding    |
| MSTRG. 17012.2  | -0.028784 | noncoding |
| MSTRG. 17016.1  | -0.488433 | noncoding |
| MSTRG. 17053.2  | -0.996912 | noncoding |
| MSTRG. 17053.1  | -0.640112 | noncoding |
| MSTRG. 17054.1  | 2.12713   | coding    |
| MSTRG. 17054.2  | 1.69555   | coding    |
| MSTRG. 17055.1  | -0.596291 | noncoding |
| MSTRG. 17054.3  | 0.091922  | coding    |
| MSTRG. 17060.1  | -2.01604  | noncoding |
| MSTRG. 17061.1  | 0.008289  | coding    |
| MSTRG. 17061.2  | 0.291795  | coding    |
| MSTRG. 17067.1  | -1.69772  | noncoding |
| MSTRG. 17067.2  | 0.013681  | coding    |
| MSTRG. 17066.2  | 0.254854  | coding    |
| MSTRG. 17069.1  | 0.651865  | coding    |
| MSTRG. 17069.2  | 0.188919  | coding    |
| MSTRG. 17074.2  | 0.274784  | coding    |
| MSTRG. 17074.4  | 0.524933  | coding    |
| MSTRG. 17074.6  | 0.493112  | coding    |
| MSTRG. 17076.1  | 0.474214  | coding    |
| MSTRG. 17076.4  | 1.28595   | coding    |
| MSTRG. 17076.6  | 0.915891  | coding    |

|               |           |           |
|---------------|-----------|-----------|
| MSTRG.17077.1 | 0.379335  | coding    |
| MSTRG.17078.5 | 1.36778   | coding    |
| MSTRG.17078.1 | 1.42479   | coding    |
| MSTRG.17079.1 | -0.716151 | noncoding |
| MSTRG.17078.6 | 0.978699  | coding    |
| MSTRG.17085.2 | 0.269312  | coding    |
| MSTRG.17087.3 | -0.077155 | noncoding |
| MSTRG.17087.4 | 0.558253  | coding    |
| MSTRG.17092.1 | -1.88759  | noncoding |
| MSTRG.17093.1 | -0.675037 | noncoding |
| MSTRG.17093.2 | -0.403172 | noncoding |
| MSTRG.17093.3 | 0.45113   | coding    |
| MSTRG.17093.4 | 0.006914  | coding    |
| MSTRG.17093.5 | -0.730393 | noncoding |
| MSTRG.17096.2 | 2.20141   | coding    |
| MSTRG.17096.3 | 1.4497    | coding    |
| MSTRG.17101.1 | 1.66154   | coding    |
| MSTRG.17105.1 | -1.27466  | noncoding |
| MSTRG.17109.4 | 1.41314   | coding    |
| MSTRG.17109.2 | 1.37105   | coding    |
| MSTRG.17109.5 | 1.65236   | coding    |
| MSTRG.17111.3 | 2.59838   | coding    |
| MSTRG.17114.1 | 0.867365  | coding    |
| MSTRG.17114.2 | -0.458669 | noncoding |
| MSTRG.17115.2 | 1.29132   | coding    |
| MSTRG.17110.3 | 0.447087  | coding    |
| MSTRG.17110.1 | 0.775578  | coding    |
| MSTRG.17110.2 | 0.779353  | coding    |
| MSTRG.17110.4 | 0.329992  | coding    |
| MSTRG.17110.5 | 0.283596  | coding    |
| MSTRG.17110.6 | 0.245872  | coding    |
| MSTRG.17116.1 | 0.953947  | coding    |
| MSTRG.17117.1 | 1.35459   | coding    |
| MSTRG.17117.3 | 1.43548   | coding    |
| MSTRG.17119.2 | 1.16599   | coding    |
| MSTRG.17119.3 | 1.31534   | coding    |
| MSTRG.17119.5 | 0.951355  | coding    |
| MSTRG.17131.1 | 1.62083   | coding    |
| MSTRG.17138.2 | -2.26231  | noncoding |
| MSTRG.17138.3 | -0.230073 | noncoding |
| MSTRG.17138.4 | -0.32461  | noncoding |
| MSTRG.17138.6 | -0.219119 | noncoding |
| MSTRG.17140.2 | -1.17868  | noncoding |
| MSTRG.17134.1 | 1.81509   | coding    |
| MSTRG.17134.2 | 1.98856   | coding    |
| MSTRG.17145.1 | -2.30274  | noncoding |
| MSTRG.17150.1 | -1.12126  | noncoding |
| MSTRG.17150.2 | -0.987686 | noncoding |
| MSTRG.17151.4 | 1.52478   | coding    |
| MSTRG.17152.2 | -0.374105 | noncoding |
| MSTRG.17155.1 | 0.727136  | coding    |
| MSTRG.17155.4 | 0.482234  | coding    |
| MSTRG.17166.1 | -0.134721 | noncoding |
| MSTRG.17166.2 | -2.18714  | noncoding |

|                 |           |           |
|-----------------|-----------|-----------|
| MSTRG. 17168.2  | 1.90345   | coding    |
| MSTRG. 17168.3  | 1.4717    | coding    |
| MSTRG. 17158.1  | -1.23804  | noncoding |
| MSTRG. 17172.2  | -0.892181 | noncoding |
| MSTRG. 17172.3  | -0.643095 | noncoding |
| MSTRG. 17192.2  | 1.12512   | coding    |
| MSTRG. 17192.1  | 1.14354   | coding    |
| MSTRG. 17192.3  | 1.15575   | coding    |
| MSTRG. 17192.4  | 1.76783   | coding    |
| MSTRG. 17193.1  | 0.361907  | coding    |
| MSTRG. 17202.1  | -0.610266 | noncoding |
| MSTRG. 17207.1  | -0.533365 | noncoding |
| MSTRG. 17215.2  | -1.02609  | noncoding |
| MSTRG. 17225.1  | -1.79519  | noncoding |
| MSTRG. 17175.1  | -1.15809  | noncoding |
| MSTRG. 17175.2  | -0.87437  | noncoding |
| MSTRG. 17176.1  | -2.11587  | noncoding |
| MSTRG. 17177.4  | 0.646549  | coding    |
| MSTRG. 17177.3  | 1.84895   | coding    |
| MSTRG. 17177.2  | 2.07514   | coding    |
| MSTRG. 17177.5  | 1.44699   | coding    |
| MSTRG. 17177.6  | 1.21109   | coding    |
| MSTRG. 17178.1  | 0.996591  | coding    |
| MSTRG. 17178.2  | -0.050037 | noncoding |
| MSTRG. 17177.7  | 1.02931   | coding    |
| MSTRG. 17179.1  | 0.164512  | coding    |
| MSTRG. 17180.1  | -1.09842  | noncoding |
| MSTRG. 17398.2  | 0.211552  | coding    |
| MSTRG. 17399.1  | -0.607497 | noncoding |
| MSTRG. 17400.1  | -0.707561 | noncoding |
| MSTRG. 17401.1  | -0.860792 | noncoding |
| MSTRG. 17402.1  | 1.38595   | coding    |
| MSTRG. 17402.2  | -0.742324 | noncoding |
| MSTRG. 17402.3  | -0.8356   | noncoding |
| MSTRG. 17402.5  | -2.24965  | noncoding |
| MSTRG. 17402.6  | -1.53188  | noncoding |
| MSTRG. 17402.11 | 0.349618  | coding    |
| MSTRG. 17403.1  | -1.59374  | noncoding |
| MSTRG. 17402.13 | -0.129994 | noncoding |
| MSTRG. 17405.1  | 0.688761  | coding    |
| MSTRG. 17402.14 | 0.090504  | coding    |
| MSTRG. 17402.15 | 1.60571   | coding    |
| MSTRG. 17402.16 | -0.38997  | noncoding |
| MSTRG. 17402.19 | 1.91148   | coding    |
| MSTRG. 17402.17 | -1.01171  | noncoding |
| MSTRG. 17402.20 | 1.19874   | coding    |
| MSTRG. 17402.21 | 1.75394   | coding    |
| MSTRG. 17402.24 | 2.06751   | coding    |
| MSTRG. 17402.23 | 0.656708  | coding    |
| MSTRG. 17402.25 | 1.09807   | coding    |
| MSTRG. 17402.29 | 0.617317  | coding    |
| MSTRG. 17402.27 | 1.67624   | coding    |
| MSTRG. 17402.31 | 0.67982   | coding    |
| MSTRG. 17402.32 | 0.34571   | coding    |

|                  |            |           |
|------------------|------------|-----------|
| MSTRG. 17406. 1  | -1. 76505  | noncoding |
| MSTRG. 17407. 1  | 0. 154416  | coding    |
| MSTRG. 17402. 34 | -1. 63691  | noncoding |
| MSTRG. 17402. 35 | -1. 14101  | noncoding |
| MSTRG. 17402. 36 | -1. 08394  | noncoding |
| MSTRG. 17402. 37 | 2. 26377   | coding    |
| MSTRG. 17408. 1  | -1. 19601  | noncoding |
| MSTRG. 17409. 1  | -2. 18817  | noncoding |
| MSTRG. 17409. 2  | -2. 44181  | noncoding |
| MSTRG. 17409. 3  | -2. 32524  | noncoding |
| MSTRG. 17410. 1  | -2. 61867  | noncoding |
| MSTRG. 17411. 1  | -2. 64934  | noncoding |
| MSTRG. 17412. 1  | -1. 27813  | noncoding |
| MSTRG. 17413. 1  | -0. 144572 | noncoding |
| MSTRG. 17414. 1  | -2. 60991  | noncoding |
| MSTRG. 17402. 38 | -0. 849365 | noncoding |
| MSTRG. 17415. 1  | -0. 1      | noncoding |
| MSTRG. 17416. 1  | -1. 84805  | noncoding |
| MSTRG. 17417. 1  | -1. 22427  | noncoding |
| MSTRG. 17407. 2  | 0. 072652  | coding    |
| MSTRG. 17407. 3  | 0. 943279  | coding    |
| MSTRG. 17407. 4  | 1. 09509   | coding    |
| MSTRG. 17418. 1  | -2. 44633  | noncoding |
| MSTRG. 17419. 1  | -1. 07282  | noncoding |
| MSTRG. 17420. 1  | -1. 47987  | noncoding |
| MSTRG. 17421. 2  | 0. 899115  | coding    |
| MSTRG. 17421. 4  | -0. 909505 | noncoding |
| MSTRG. 17422. 1  | 0. 551528  | coding    |
| MSTRG. 17400. 2  | -1. 05081  | noncoding |
| MSTRG. 17402. 68 | -1. 16712  | noncoding |
| MSTRG. 17402. 75 | 1. 47422   | coding    |
| MSTRG. 17402. 77 | -0. 952482 | noncoding |
| MSTRG. 17424. 1  | -1. 34402  | noncoding |
| MSTRG. 17407. 10 | 1. 96968   | coding    |
| MSTRG. 17407. 12 | 2. 11163   | coding    |
| MSTRG. 17428. 1  | -1. 5346   | noncoding |
| MSTRG. 17421. 5  | 0. 514695  | coding    |
| MSTRG. 17432. 1  | -2. 01793  | noncoding |
| MSTRG. 17421. 13 | 2. 11387   | coding    |
| MSTRG. 17432. 2  | -0. 427126 | noncoding |
| MSTRG. 17187. 1  | -0. 531728 | noncoding |
| MSTRG. 17189. 1  | -1. 32912  | noncoding |
| MSTRG. 17189. 2  | -2. 23628  | noncoding |
| MSTRG. 17276. 3  | -0. 269819 | noncoding |
| MSTRG. 17276. 4  | 0. 575711  | coding    |
| MSTRG. 17276. 5  | 0. 668394  | coding    |
| MSTRG. 17276. 6  | 0. 449177  | coding    |
| MSTRG. 17276. 7  | -1. 0442   | noncoding |
| MSTRG. 17278. 1  | 0. 254902  | coding    |
| MSTRG. 17278. 3  | 0. 833013  | coding    |
| MSTRG. 17278. 2  | 0. 633607  | coding    |
| MSTRG. 17278. 4  | 0. 408346  | coding    |
| MSTRG. 17279. 4  | 0. 284799  | coding    |
| MSTRG. 17279. 3  | 2. 29724   | coding    |

|                |           |           |
|----------------|-----------|-----------|
| MSTRG.17280.5  | 1.74307   | coding    |
| MSTRG.17280.4  | 1.62576   | coding    |
| MSTRG.17190.1  | 2.72177   | coding    |
| MSTRG.17263.3  | 0.236401  | coding    |
| MSTRG.17264.1  | 0.039174  | coding    |
| MSTRG.17264.2  | -0.703548 | noncoding |
| MSTRG.17265.1  | -1.63797  | noncoding |
| MSTRG.17266.1  | 0.989043  | coding    |
| MSTRG.17266.3  | 2.06498   | coding    |
| MSTRG.17266.5  | 0.966875  | coding    |
| MSTRG.17266.6  | 1.19243   | coding    |
| MSTRG.17191.1  | -1.21338  | noncoding |
| MSTRG.17270.1  | 0.904078  | coding    |
| MSTRG.17269.4  | 1.37752   | coding    |
| MSTRG.17271.1  | 0.891137  | coding    |
| MSTRG.17292.1  | -1.21623  | noncoding |
| MSTRG.17292.2  | -1.87363  | noncoding |
| MSTRG.17294.1  | 1.8992    | coding    |
| MSTRG.17294.2  | 1.8727    | coding    |
| MSTRG.17294.3  | 1.41349   | coding    |
| MSTRG.17294.5  | 0.522923  | coding    |
| MSTRG.17294.4  | 0.992319  | coding    |
| MSTRG.17294.6  | 1.05526   | coding    |
| MSTRG.17294.7  | 0.14777   | coding    |
| MSTRG.17294.9  | 0.05556   | coding    |
| MSTRG.17294.8  | -0.099289 | noncoding |
| MSTRG.17294.10 | 1.26778   | coding    |
| MSTRG.17294.12 | -0.250889 | noncoding |
| MSTRG.17294.13 | 0.489195  | coding    |
| MSTRG.17294.14 | 0.530193  | coding    |
| MSTRG.17291.1  | -2.66452  | noncoding |
| MSTRG.17299.2  | 1.40443   | coding    |
| MSTRG.17299.3  | 1.09621   | coding    |
| MSTRG.17301.3  | 0.909561  | coding    |
| MSTRG.17297.2  | 0.662318  | coding    |
| MSTRG.17307.1  | -1.67084  | noncoding |
| MSTRG.17308.3  | 0.997033  | coding    |
| MSTRG.17308.6  | 0.886059  | coding    |
| MSTRG.17304.1  | -2.22502  | noncoding |
| MSTRG.17306.1  | -1.02941  | noncoding |
| MSTRG.17309.2  | 0.878948  | coding    |
| MSTRG.17310.1  | -2.02967  | noncoding |
| MSTRG.17310.2  | -1.92326  | noncoding |
| MSTRG.17311.2  | 1.96921   | coding    |
| MSTRG.17313.1  | -1.30142  | noncoding |
| MSTRG.17313.2  | -2.01386  | noncoding |
| MSTRG.17315.2  | 1.47015   | coding    |
| MSTRG.17326.3  | 1.35384   | coding    |
| MSTRG.17329.1  | 1.60806   | coding    |
| MSTRG.17333.3  | 0.448375  | coding    |
| MSTRG.17333.2  | -0.097199 | noncoding |
| MSTRG.17334.2  | 1.03282   | coding    |
| MSTRG.17337.1  | 0.907684  | coding    |
| MSTRG.17339.1  | -2.1051   | noncoding |

|                 |           |           |
|-----------------|-----------|-----------|
| MSTRG. 17336.6  | -2.32388  | noncoding |
| MSTRG. 17336.7  | -2.43376  | noncoding |
| MSTRG. 17340.1  | -1.95929  | noncoding |
| MSTRG. 17341.2  | 1.06103   | coding    |
| MSTRG. 17341.6  | 1.41376   | coding    |
| MSTRG. 17343.1  | -1.51989  | noncoding |
| MSTRG. 17349.5  | 1.58862   | coding    |
| MSTRG. 17349.4  | 1.40616   | coding    |
| MSTRG. 17350.1  | -1.66457  | noncoding |
| MSTRG. 17349.9  | 1.48877   | coding    |
| MSTRG. 17349.12 | 1.39761   | coding    |
| MSTRG. 17349.8  | 1.10318   | coding    |
| MSTRG. 17349.7  | 0.807577  | coding    |
| MSTRG. 17349.10 | 1.80619   | coding    |
| MSTRG. 17349.11 | 1.63965   | coding    |
| MSTRG. 17349.13 | 1.16282   | coding    |
| MSTRG. 17349.14 | 0.679479  | coding    |
| MSTRG. 17349.15 | 1.35795   | coding    |
| MSTRG. 17351.1  | 0.168395  | coding    |
| MSTRG. 17352.1  | -0.527157 | noncoding |
| MSTRG. 17347.1  | -1.57607  | noncoding |
| MSTRG. 17348.1  | 3.10978   | coding    |
| MSTRG. 17348.2  | 3.15068   | coding    |
| MSTRG. 17348.4  | 2.99014   | coding    |
| MSTRG. 17368.10 | 1.06117   | coding    |
| MSTRG. 17368.1  | 1.59748   | coding    |
| MSTRG. 17368.4  | 1.5606    | coding    |
| MSTRG. 17368.5  | 1.57623   | coding    |
| MSTRG. 17368.7  | 1.48326   | coding    |
| MSTRG. 17368.12 | 1.56943   | coding    |
| MSTRG. 17369.1  | -0.519615 | noncoding |
| MSTRG. 17368.13 | -1.62085  | noncoding |
| MSTRG. 17368.14 | 0.728831  | coding    |
| MSTRG. 17364.3  | 0.833237  | coding    |
| MSTRG. 17366.1  | 1.21815   | coding    |
| MSTRG. 17370.2  | 0.91195   | coding    |
| MSTRG. 17371.2  | 0.113037  | coding    |
| MSTRG. 17372.1  | 0.611488  | coding    |
| MSTRG. 17370.3  | -0.642873 | noncoding |
| MSTRG. 17373.1  | 1.14093   | coding    |
| MSTRG. 17374.1  | 1.35068   | coding    |
| MSTRG. 17370.4  | 0.030379  | coding    |
| MSTRG. 17370.5  | -0.056653 | noncoding |
| MSTRG. 17370.6  | 0.223975  | coding    |
| MSTRG. 17370.7  | -1.20489  | noncoding |
| MSTRG. 17370.8  | 0.751791  | coding    |
| MSTRG. 17370.9  | 0.804129  | coding    |
| MSTRG. 17375.1  | -1.50163  | noncoding |
| MSTRG. 17370.10 | 0.371156  | coding    |
| MSTRG. 17379.1  | 0.928262  | coding    |
| MSTRG. 17379.13 | -1.60601  | noncoding |
| MSTRG. 17379.14 | 1.39678   | coding    |
| MSTRG. 17379.12 | 0.717504  | coding    |
| MSTRG. 17379.8  | 0.880564  | coding    |



|                  |            |           |
|------------------|------------|-----------|
| MSTRG. 17379. 10 | 0. 890343  | coding    |
| MSTRG. 17379. 11 | 1. 02044   | coding    |
| MSTRG. 17379. 15 | 0. 966583  | coding    |
| MSTRG. 17380. 1  | -0. 414829 | noncoding |
| MSTRG. 17381. 1  | -0. 214862 | noncoding |
| MSTRG. 17387. 2  | -0. 5553   | noncoding |
| MSTRG. 17397. 1  | -1. 49879  | noncoding |
| MSTRG. 17438. 3  | 1. 72392   | coding    |
| MSTRG. 17438. 6  | 2. 28567   | coding    |
| MSTRG. 17438. 7  | 2. 30735   | coding    |
| MSTRG. 17438. 8  | 2. 2212    | coding    |
| MSTRG. 17438. 9  | 1. 14352   | coding    |
| MSTRG. 17438. 10 | 1. 5729    | coding    |
| MSTRG. 17438. 11 | 1. 02852   | coding    |
| MSTRG. 17437. 1  | -0. 782264 | noncoding |
| MSTRG. 17441. 1  | 1. 4343    | coding    |
| MSTRG. 17441. 2  | 1. 47341   | coding    |
| MSTRG. 17441. 3  | -1. 54547  | noncoding |
| MSTRG. 17462. 1  | -0. 022479 | noncoding |
| MSTRG. 17463. 1  | -1. 14236  | noncoding |
| MSTRG. 17464. 1  | 0. 186693  | coding    |
| MSTRG. 17464. 4  | 0. 092383  | coding    |
| MSTRG. 17465. 1  | -0. 331341 | noncoding |
| MSTRG. 17467. 1  | -0. 393225 | noncoding |
| MSTRG. 17469. 1  | 0. 327677  | coding    |
| MSTRG. 17470. 1  | -0. 489696 | noncoding |
| MSTRG. 17471. 1  | -1. 01377  | noncoding |
| MSTRG. 17474. 1  | 1. 00534   | coding    |
| MSTRG. 17475. 1  | 0. 278457  | coding    |
| MSTRG. 17475. 2  | 0. 293216  | coding    |
| MSTRG. 17475. 3  | -0. 082199 | noncoding |
| MSTRG. 17476. 1  | 0. 452811  | coding    |
| MSTRG. 17477. 1  | -0. 051491 | noncoding |
| MSTRG. 17478. 1  | -0. 034152 | noncoding |
| MSTRG. 17464. 12 | 1. 35846   | coding    |
| MSTRG. 17464. 11 | 1. 88848   | coding    |
| MSTRG. 17464. 10 | 1. 83832   | coding    |
| MSTRG. 17464. 14 | 1. 80938   | coding    |
| MSTRG. 17464. 16 | -0. 110181 | noncoding |
| MSTRG. 17480. 1  | -1. 61486  | noncoding |
| MSTRG. 17481. 1  | 1. 93418   | coding    |
| MSTRG. 17481. 4  | 2. 07676   | coding    |
| MSTRG. 17481. 5  | 1. 87759   | coding    |
| MSTRG. 17481. 7  | 2. 01845   | coding    |
| MSTRG. 17481. 6  | 1. 93302   | coding    |
| MSTRG. 17446. 1  | -0. 534673 | noncoding |
| MSTRG. 17450. 1  | 1. 87129   | coding    |
| MSTRG. 17454. 1  | 0. 971391  | coding    |
| MSTRG. 17454. 3  | 0. 264784  | coding    |
| MSTRG. 17456. 2  | 0. 6301    | coding    |
| MSTRG. 17456. 3  | 0. 599895  | coding    |
| MSTRG. 17456. 4  | 0. 785321  | coding    |
| MSTRG. 17456. 5  | 0. 813998  | coding    |
| MSTRG. 17453. 2  | -0. 256137 | noncoding |

|                |           |           |
|----------------|-----------|-----------|
| MSTRG.17458.3  | 0.889206  | coding    |
| MSTRG.17524.1  | 0.786997  | coding    |
| MSTRG.17528.1  | 1.99952   | coding    |
| MSTRG.17528.3  | 2.09113   | coding    |
| MSTRG.17528.2  | 2.16454   | coding    |
| MSTRG.17528.5  | 1.9532    | coding    |
| MSTRG.17529.1  | -1.57184  | noncoding |
| MSTRG.17530.1  | 0.201844  | coding    |
| MSTRG.17531.1  | -1.11369  | noncoding |
| MSTRG.17528.6  | 0.403581  | coding    |
| MSTRG.17528.7  | -0.089246 | noncoding |
| MSTRG.17528.8  | 0.360781  | coding    |
| MSTRG.17528.9  | -0.136846 | noncoding |
| MSTRG.17532.1  | 0.052511  | coding    |
| MSTRG.17532.2  | -0.384474 | noncoding |
| MSTRG.17532.3  | 0.290797  | coding    |
| MSTRG.17528.10 | -1.41636  | noncoding |
| MSTRG.17528.11 | -0.113905 | noncoding |
| MSTRG.17533.1  | -1.5803   | noncoding |
| MSTRG.17528.12 | 0.169656  | coding    |
| MSTRG.17528.13 | 0.405145  | coding    |
| MSTRG.17528.14 | -0.007467 | noncoding |
| MSTRG.17528.15 | 0.210818  | coding    |
| MSTRG.17528.16 | 0.205464  | coding    |
| MSTRG.17528.17 | 0.41053   | coding    |
| MSTRG.17528.18 | 0.225323  | coding    |
| MSTRG.17535.1  | -2.03629  | noncoding |
| MSTRG.17528.19 | -1.30425  | noncoding |
| MSTRG.17528.20 | -2.38227  | noncoding |
| MSTRG.17536.1  | -0.324345 | noncoding |
| MSTRG.17528.21 | -1.03886  | noncoding |
| MSTRG.17459.2  | -0.472146 | noncoding |
| MSTRG.17482.3  | -0.635752 | noncoding |
| MSTRG.17482.4  | 0.987749  | coding    |
| MSTRG.17490.2  | 2.49373   | coding    |
| MSTRG.17490.5  | -0.073756 | noncoding |
| MSTRG.17490.4  | 0.446957  | coding    |
| MSTRG.17460.3  | -0.285096 | noncoding |
| MSTRG.17496.2  | 0.731598  | coding    |
| MSTRG.17498.2  | 0.974188  | coding    |
| MSTRG.17498.3  | 1.28974   | coding    |
| MSTRG.17539.1  | 2.07054   | coding    |
| MSTRG.17539.2  | 1.44087   | coding    |
| MSTRG.17541.1  | 0.096387  | coding    |
| MSTRG.17541.2  | 0.655166  | coding    |
| MSTRG.17541.3  | 0.418702  | coding    |
| MSTRG.17541.4  | 0.24684   | coding    |
| MSTRG.17541.5  | 0.880478  | coding    |
| MSTRG.17541.6  | 0.182177  | coding    |
| MSTRG.17541.7  | 0.995107  | coding    |
| MSTRG.17546.1  | 0.543665  | coding    |
| MSTRG.17541.8  | 0.542177  | coding    |
| MSTRG.17548.1  | -0.507351 | noncoding |
| MSTRG.17550.1  | -0.593885 | noncoding |

|                |           |           |
|----------------|-----------|-----------|
| MSTRG.17551.1  | 0.891088  | coding    |
| MSTRG.17551.2  | -0.147004 | noncoding |
| MSTRG.17552.1  | -1.55468  | noncoding |
| MSTRG.17553.1  | -0.219159 | noncoding |
| MSTRG.17557.1  | 1.64567   | coding    |
| MSTRG.17512.2  | 1.25849   | coding    |
| MSTRG.17515.1  | -1.1632   | noncoding |
| MSTRG.17516.3  | -0.375831 | noncoding |
| MSTRG.17516.4  | 2.33804   | coding    |
| MSTRG.17516.5  | 2.28767   | coding    |
| MSTRG.17523.6  | 0.187947  | coding    |
| MSTRG.17523.4  | 0.313649  | coding    |
| MSTRG.17523.7  | 0.338613  | coding    |
| MSTRG.17523.5  | 2.86972   | coding    |
| MSTRG.17523.8  | 2.96431   | coding    |
| MSTRG.17559.1  | 2.76289   | coding    |
| MSTRG.17559.3  | 1.36803   | coding    |
| MSTRG.17559.4  | 0.949952  | coding    |
| MSTRG.17559.5  | 0.958976  | coding    |
| MSTRG.17559.7  | 1.61231   | coding    |
| MSTRG.17559.6  | 1.42941   | coding    |
| MSTRG.17559.8  | 0.758345  | coding    |
| MSTRG.17560.1  | -0.702409 | noncoding |
| MSTRG.17560.2  | -1.96204  | noncoding |
| MSTRG.17566.3  | 0.795863  | coding    |
| MSTRG.17566.5  | 0.563677  | coding    |
| MSTRG.17567.1  | 0.261907  | coding    |
| MSTRG.17567.2  | 1.03405   | coding    |
| MSTRG.17568.1  | -0.515977 | noncoding |
| MSTRG.17579.1  | -0.480276 | noncoding |
| MSTRG.17580.1  | 2.32363   | coding    |
| MSTRG.17580.3  | 2.04607   | coding    |
| MSTRG.17580.2  | 2.05472   | coding    |
| MSTRG.17580.4  | 1.97729   | coding    |
| MSTRG.17580.6  | 2.12188   | coding    |
| MSTRG.17581.2  | -1.61495  | noncoding |
| MSTRG.17581.1  | -1.46278  | noncoding |
| MSTRG.17581.3  | -1.35545  | noncoding |
| MSTRG.17582.1  | 0.650949  | coding    |
| MSTRG.17582.2  | 1.15247   | coding    |
| MSTRG.17580.8  | 0.930688  | coding    |
| MSTRG.17580.9  | 0.700008  | coding    |
| MSTRG.17580.10 | -0.192062 | noncoding |
| MSTRG.17580.11 | 0.103041  | coding    |
| MSTRG.17571.1  | 0.510072  | coding    |
| MSTRG.17572.1  | -1.50748  | noncoding |
| MSTRG.17571.3  | 0.552741  | coding    |
| MSTRG.17571.4  | 0.448628  | coding    |
| MSTRG.17571.5  | 0.567931  | coding    |
| MSTRG.17575.1  | -2.12389  | noncoding |
| MSTRG.17577.1  | -0.780794 | noncoding |
| MSTRG.17577.2  | -1.05472  | noncoding |
| MSTRG.17584.1  | -0.929061 | noncoding |
| MSTRG.17585.9  | 0.577192  | coding    |

|                  |            |           |
|------------------|------------|-----------|
| MSTRG. 17585. 8  | 1. 34517   | coding    |
| MSTRG. 17585. 5  | 1. 84945   | coding    |
| MSTRG. 17585. 12 | 1. 27631   | coding    |
| MSTRG. 17585. 15 | 0. 599097  | coding    |
| MSTRG. 17585. 16 | 0. 625853  | coding    |
| MSTRG. 17585. 13 | 1. 77447   | coding    |
| MSTRG. 17585. 14 | 1. 75871   | coding    |
| MSTRG. 17585. 17 | 1. 31658   | coding    |
| MSTRG. 17585. 18 | 0. 210109  | coding    |
| MSTRG. 17590. 2  | 0. 800792  | coding    |
| MSTRG. 17590. 3  | 1. 62399   | coding    |
| MSTRG. 17590. 6  | 1. 91748   | coding    |
| MSTRG. 17592. 1  | -0. 157998 | noncoding |
| MSTRG. 17597. 2  | 1. 97837   | coding    |
| MSTRG. 17602. 1  | -1. 38108  | noncoding |
| MSTRG. 17615. 1  | 0. 011745  | coding    |
| MSTRG. 17615. 2  | 0. 316873  | coding    |
| MSTRG. 17615. 15 | 2. 55555   | coding    |
| MSTRG. 17615. 5  | 2. 36522   | coding    |
| MSTRG. 17615. 18 | -0. 135514 | noncoding |
| MSTRG. 17605. 2  | 0. 927217  | coding    |
| MSTRG. 17605. 3  | 0. 469844  | coding    |
| MSTRG. 17608. 6  | 1. 07852   | coding    |
| MSTRG. 17608. 8  | 1. 22727   | coding    |
| MSTRG. 17608. 4  | 1. 15814   | coding    |
| MSTRG. 17608. 5  | 1. 09512   | coding    |
| MSTRG. 17608. 7  | 0. 914716  | coding    |
| MSTRG. 17608. 9  | 0. 649103  | coding    |
| MSTRG. 17608. 2  | 1. 32089   | coding    |
| MSTRG. 17607. 1  | -0. 368007 | noncoding |
| MSTRG. 17619. 1  | -0. 055482 | noncoding |
| MSTRG. 17622. 1  | 0. 767649  | coding    |
| MSTRG. 17622. 2  | 0. 803552  | coding    |
| MSTRG. 17619. 3  | -0. 155294 | noncoding |
| MSTRG. 17622. 8  | 1. 24847   | coding    |
| MSTRG. 17622. 9  | 1. 23121   | coding    |
| MSTRG. 17622. 11 | 0. 526381  | coding    |
| MSTRG. 17628. 2  | 1. 09876   | coding    |
| MSTRG. 17629. 1  | 1. 81484   | coding    |
| MSTRG. 17631. 2  | 0. 724914  | coding    |
| MSTRG. 17631. 3  | 1. 20447   | coding    |
| MSTRG. 17631. 4  | 1. 00536   | coding    |
| MSTRG. 17624. 1  | 0. 438965  | coding    |
| MSTRG. 17635. 2  | 1. 71123   | coding    |
| MSTRG. 17635. 1  | 1. 67612   | coding    |
| MSTRG. 17635. 3  | 1. 74757   | coding    |
| MSTRG. 17636. 1  | -2. 03341  | noncoding |
| MSTRG. 17635. 4  | 1. 41582   | coding    |
| MSTRG. 17635. 6  | 1. 69271   | coding    |
| MSTRG. 17635. 7  | 1. 69271   | coding    |
| MSTRG. 17635. 9  | 1. 56526   | coding    |
| MSTRG. 17635. 10 | -1. 58806  | noncoding |
| MSTRG. 17638. 1  | -0. 395731 | noncoding |
| MSTRG. 17639. 1  | -0. 831316 | noncoding |

|                  |            |           |
|------------------|------------|-----------|
| MSTRG. 17640. 1  | -2. 07428  | noncoding |
| MSTRG. 17641. 1  | -1. 02591  | noncoding |
| MSTRG. 17635. 12 | -0. 425161 | noncoding |
| MSTRG. 17632. 2  | 2. 24567   | coding    |
| MSTRG. 17632. 3  | 2. 12178   | coding    |
| MSTRG. 17643. 2  | 1. 03974   | coding    |
| MSTRG. 17643. 3  | 0. 224356  | coding    |
| MSTRG. 17645. 3  | 2. 22684   | coding    |
| MSTRG. 17645. 7  | 0. 249228  | coding    |
| MSTRG. 17647. 1  | 1. 08329   | coding    |
| MSTRG. 17647. 2  | 1. 90644   | coding    |
| MSTRG. 17647. 3  | 1. 37945   | coding    |
| MSTRG. 17647. 4  | 1. 77311   | coding    |
| MSTRG. 17648. 2  | 1. 44679   | coding    |
| MSTRG. 17653. 1  | -0. 19686  | noncoding |
| MSTRG. 17654. 1  | -0. 104443 | noncoding |
| MSTRG. 17660. 1  | 0. 348017  | coding    |
| MSTRG. 17661. 3  | -0. 215367 | noncoding |
| MSTRG. 17661. 4  | 0. 090984  | coding    |
| MSTRG. 17663. 2  | 0. 83998   | coding    |
| MSTRG. 17665. 2  | -1. 42653  | noncoding |
| MSTRG. 17667. 2  | -0. 46276  | noncoding |
| MSTRG. 17669. 1  | -1. 9814   | noncoding |
| MSTRG. 17670. 1  | -1. 36187  | noncoding |
| MSTRG. 17672. 1  | -1. 87434  | noncoding |
| MSTRG. 17674. 2  | -0. 386839 | noncoding |
| MSTRG. 17674. 1  | -0. 721894 | noncoding |
| MSTRG. 17674. 3  | -0. 534197 | noncoding |
| MSTRG. 17677. 1  | 0. 383613  | coding    |
| MSTRG. 17677. 3  | 0. 351643  | coding    |
| MSTRG. 17679. 2  | 0. 815547  | coding    |
| MSTRG. 17676. 2  | -1. 25166  | noncoding |
| MSTRG. 17681. 1  | 0. 10345   | coding    |
| MSTRG. 17681. 3  | 0. 304038  | coding    |
| MSTRG. 17682. 2  | 1. 49004   | coding    |
| MSTRG. 17685. 2  | 0. 726569  | coding    |
| MSTRG. 17686. 1  | -0. 737831 | noncoding |
| MSTRG. 17706. 6  | 1. 30924   | coding    |
| MSTRG. 17706. 4  | 1. 3678    | coding    |
| MSTRG. 17706. 5  | 1. 48323   | coding    |
| MSTRG. 17706. 8  | 1. 50231   | coding    |
| MSTRG. 17706. 7  | 1. 51447   | coding    |
| MSTRG. 17706. 9  | 1. 39389   | coding    |
| MSTRG. 17706. 12 | 1. 39192   | coding    |
| MSTRG. 17706. 14 | 1. 47631   | coding    |
| MSTRG. 17706. 11 | 1. 49896   | coding    |
| MSTRG. 17706. 10 | 1. 49609   | coding    |
| MSTRG. 17706. 16 | 1. 49058   | coding    |
| MSTRG. 17706. 18 | 1. 1786    | coding    |
| MSTRG. 17706. 17 | 1. 48583   | coding    |
| MSTRG. 17706. 19 | 1. 48249   | coding    |
| MSTRG. 17706. 20 | 1. 50234   | coding    |
| MSTRG. 17706. 22 | -0. 064741 | noncoding |
| MSTRG. 17706. 23 | -0. 723601 | noncoding |

|                |           |           |
|----------------|-----------|-----------|
| MSTRG.17695.1  | 1.46951   | coding    |
| MSTRG.17697.1  | -1.10276  | noncoding |
| MSTRG.17698.2  | 0.206708  | coding    |
| MSTRG.17698.3  | -0.749252 | noncoding |
| MSTRG.17701.2  | 0.538457  | coding    |
| MSTRG.17702.1  | -1.77786  | noncoding |
| MSTRG.17710.3  | 1.22167   | coding    |
| MSTRG.17710.4  | 1.18814   | coding    |
| MSTRG.17710.6  | 1.63178   | coding    |
| MSTRG.17711.4  | -0.258533 | noncoding |
| MSTRG.17711.2  | 2.03486   | coding    |
| MSTRG.17709.1  | -2.1847   | noncoding |
| MSTRG.17714.1  | 0.660845  | coding    |
| MSTRG.17714.4  | 0.757556  | coding    |
| MSTRG.17718.2  | 1.27141   | coding    |
| MSTRG.17718.3  | 0.640067  | coding    |
| MSTRG.17730.1  | 0.185688  | coding    |
| MSTRG.17731.1  | 0.138461  | coding    |
| MSTRG.17731.2  | -1.65162  | noncoding |
| MSTRG.17729.6  | -0.181045 | noncoding |
| MSTRG.17729.4  | 1.36221   | coding    |
| MSTRG.17729.5  | 1.45722   | coding    |
| MSTRG.17729.7  | 1.60507   | coding    |
| MSTRG.17729.8  | 1.52478   | coding    |
| MSTRG.17729.9  | 0.108104  | coding    |
| MSTRG.17732.1  | 0.459494  | coding    |
| MSTRG.17729.10 | -0.476129 | noncoding |
| MSTRG.17733.7  | 1.91334   | coding    |
| MSTRG.17733.10 | 2.4553    | coding    |
| MSTRG.17733.12 | 0.380429  | coding    |
| MSTRG.17733.11 | 1.3583    | coding    |
| MSTRG.17725.2  | 0.309523  | coding    |
| MSTRG.17728.1  | -2.06735  | noncoding |
| MSTRG.17735.2  | 2.10838   | coding    |
| MSTRG.17740.2  | 0.743008  | coding    |
| MSTRG.17741.4  | 0.247275  | coding    |
| MSTRG.17741.5  | 0.441814  | coding    |
| MSTRG.17741.6  | -0.523759 | noncoding |
| MSTRG.17744.1  | -2.16504  | noncoding |
| MSTRG.17751.2  | 2.437     | coding    |
| MSTRG.17755.2  | 1.48147   | coding    |
| MSTRG.17755.3  | 1.49732   | coding    |
| MSTRG.17747.1  | -1.17272  | noncoding |
| MSTRG.17762.1  | -2.21252  | noncoding |
| MSTRG.17775.2  | -0.468418 | noncoding |
| MSTRG.17776.2  | 0.70728   | coding    |
| MSTRG.17779.1  | 0.411297  | coding    |
| MSTRG.17779.2  | 0.333494  | coding    |
| MSTRG.17779.4  | 0.351357  | coding    |
| MSTRG.17779.5  | 0.46102   | coding    |
| MSTRG.17779.10 | 0.307212  | coding    |
| MSTRG.17779.11 | 0.319068  | coding    |
| MSTRG.17768.1  | 2.17685   | coding    |
| MSTRG.17769.3  | -0.320851 | noncoding |

|               |           |           |
|---------------|-----------|-----------|
| MSTRG.17770.2 | 0.899743  | coding    |
| MSTRG.17770.3 | 1.25527   | coding    |
| MSTRG.17773.1 | 0.402187  | coding    |
| MSTRG.17773.2 | 1.74922   | coding    |
| MSTRG.17773.3 | 0.615387  | coding    |
| MSTRG.17774.1 | -1.63628  | noncoding |
| MSTRG.17781.2 | 0.357186  | coding    |
| MSTRG.17781.3 | 1.00388   | coding    |
| MSTRG.17782.1 | -0.873131 | noncoding |
| MSTRG.17784.3 | 2.63533   | coding    |
| MSTRG.17785.2 | -0.34741  | noncoding |
| MSTRG.17785.3 | -0.070681 | noncoding |
| MSTRG.17789.1 | 0.20776   | coding    |
| MSTRG.17789.4 | 0.212556  | coding    |
| MSTRG.17789.6 | 0.22756   | coding    |
| MSTRG.17791.6 | 2.76677   | coding    |
| MSTRG.17791.5 | 2.69647   | coding    |
| MSTRG.17791.4 | 2.61777   | coding    |
| MSTRG.17792.1 | -0.211717 | noncoding |
| MSTRG.17796.2 | 2.60829   | coding    |
| MSTRG.17794.1 | 1.42362   | coding    |
| MSTRG.17802.1 | -0.097339 | noncoding |
| MSTRG.17807.1 | 1.01181   | coding    |
| MSTRG.17806.1 | -1.69749  | noncoding |
| MSTRG.17814.1 | 1.32432   | coding    |
| MSTRG.17814.2 | 0.605672  | coding    |
| MSTRG.17816.1 | 0.024692  | coding    |
| MSTRG.17814.6 | 1.8101    | coding    |
| MSTRG.17814.4 | 1.74125   | coding    |
| MSTRG.17814.5 | 1.79018   | coding    |
| MSTRG.17817.2 | -0.870338 | noncoding |
| MSTRG.17817.1 | -0.157752 | noncoding |
| MSTRG.17817.3 | -0.418627 | noncoding |
| MSTRG.17810.2 | 1.40939   | coding    |
| MSTRG.17811.3 | -0.242278 | noncoding |
| MSTRG.17825.4 | 1.53205   | coding    |
| MSTRG.17826.4 | 1.50649   | coding    |
| MSTRG.17826.3 | 1.39779   | coding    |
| MSTRG.17826.2 | 1.49653   | coding    |
| MSTRG.17826.7 | 0.019186  | coding    |
| MSTRG.17826.8 | 0.197385  | coding    |
| MSTRG.17826.6 | 0.071683  | coding    |
| MSTRG.17826.9 | 0.105536  | coding    |
| MSTRG.17828.6 | 0.578841  | coding    |
| MSTRG.17828.7 | -0.051914 | noncoding |
| MSTRG.17828.3 | 0.758933  | coding    |
| MSTRG.17829.1 | -0.963102 | noncoding |
| MSTRG.17830.4 | 1.00158   | coding    |
| MSTRG.17830.5 | 0.982061  | coding    |
| MSTRG.17830.6 | 1.33833   | coding    |
| MSTRG.17832.2 | 1.87921   | coding    |
| MSTRG.17833.1 | -1.79133  | noncoding |
| MSTRG.17835.2 | 1.00942   | coding    |
| MSTRG.17836.2 | 1.7089    | coding    |

|               |           |           |
|---------------|-----------|-----------|
| MSTRG.17836.3 | 1.67102   | coding    |
| MSTRG.17837.3 | 0.911062  | coding    |
| MSTRG.17837.4 | 0.901073  | coding    |
| MSTRG.17839.4 | 1.31304   | coding    |
| MSTRG.17819.1 | -0.28933  | noncoding |
| MSTRG.17821.2 | 0.825675  | coding    |
| MSTRG.17841.2 | 1.98268   | coding    |
| MSTRG.17841.3 | 1.86578   | coding    |
| MSTRG.17841.4 | 2.34061   | coding    |
| MSTRG.17841.5 | 1.94094   | coding    |
| MSTRG.17841.6 | 2.38179   | coding    |
| MSTRG.17842.1 | 2.4278    | coding    |
| MSTRG.17842.4 | 1.92097   | coding    |
| MSTRG.17840.1 | 2.01255   | coding    |
| MSTRG.17840.2 | 1.56635   | coding    |
| MSTRG.17845.4 | 0.473543  | coding    |
| MSTRG.17847.1 | 1.20186   | coding    |
| MSTRG.17847.3 | 0.369854  | coding    |
| MSTRG.17849.1 | -1.61112  | noncoding |
| MSTRG.17848.5 | 2.03417   | coding    |
| MSTRG.17856.1 | 0.383225  | coding    |
| MSTRG.17863.4 | 0.858534  | coding    |
| MSTRG.17863.2 | 0.517482  | coding    |
| MSTRG.17863.3 | 0.868319  | coding    |
| MSTRG.17863.5 | 0.996445  | coding    |
| MSTRG.17873.4 | -0.436825 | noncoding |
| MSTRG.17873.3 | 0.786499  | coding    |
| MSTRG.17878.1 | 0.767762  | coding    |
| MSTRG.17878.2 | 0.9664    | coding    |
| MSTRG.17878.4 | 0.806028  | coding    |
| MSTRG.17878.5 | 1.01668   | coding    |
| MSTRG.17878.6 | -0.258295 | noncoding |
| MSTRG.17879.2 | -1.39283  | noncoding |
| MSTRG.17878.7 | -0.72528  | noncoding |
| MSTRG.17865.1 | -1.8098   | noncoding |
| MSTRG.17866.1 | -0.805582 | noncoding |
| MSTRG.17867.1 | 0.538847  | coding    |
| MSTRG.17891.1 | 1.75713   | coding    |
| MSTRG.17892.2 | 2.84132   | coding    |
| MSTRG.17892.3 | 2.96046   | coding    |
| MSTRG.17892.4 | 2.17442   | coding    |
| MSTRG.17892.5 | 2.43949   | coding    |
| MSTRG.17892.7 | 0.595179  | coding    |
| MSTRG.17903.1 | -1.32099  | noncoding |
| MSTRG.17904.6 | 2.75641   | coding    |
| MSTRG.17904.5 | 2.65196   | coding    |
| MSTRG.17904.7 | 1.2105    | coding    |
| MSTRG.17908.1 | 0.215514  | coding    |
| MSTRG.17906.1 | -1.92807  | noncoding |
| MSTRG.17907.2 | -0.234836 | noncoding |
| MSTRG.17912.2 | -1.62402  | noncoding |
| MSTRG.17913.1 | -0.489652 | noncoding |
| MSTRG.17921.1 | 1.09197   | coding    |
| MSTRG.17921.5 | 1.47914   | coding    |



|                |           |           |
|----------------|-----------|-----------|
| MSTRG.17923.1  | 1.26011   | coding    |
| MSTRG.17924.1  | 1.56544   | coding    |
| MSTRG.17923.2  | -0.982004 | noncoding |
| MSTRG.17923.3  | 1.4101    | coding    |
| MSTRG.17923.4  | 0.817163  | coding    |
| MSTRG.17923.5  | -1.07986  | noncoding |
| MSTRG.17918.1  | -0.806466 | noncoding |
| MSTRG.17929.1  | -0.730446 | noncoding |
| MSTRG.17919.1  | -2.09903  | noncoding |
| MSTRG.17931.1  | -0.224547 | noncoding |
| MSTRG.17931.3  | -1.09535  | noncoding |
| MSTRG.17931.4  | -1.17724  | noncoding |
| MSTRG.17941.1  | 1.67473   | coding    |
| MSTRG.17942.3  | 1.72608   | coding    |
| MSTRG.17943.4  | 1.50273   | coding    |
| MSTRG.17943.2  | 1.21868   | coding    |
| MSTRG.17943.3  | 0.905682  | coding    |
| MSTRG.17954.3  | 0.880202  | coding    |
| MSTRG.17952.2  | 1.86654   | coding    |
| MSTRG.17958.1  | 1.00807   | coding    |
| MSTRG.17963.2  | -1.12053  | noncoding |
| MSTRG.17963.1  | -1.15996  | noncoding |
| MSTRG.17972.5  | 1.49924   | coding    |
| MSTRG.17972.7  | 1.48325   | coding    |
| MSTRG.17972.6  | 1.16406   | coding    |
| MSTRG.17972.10 | 1.48516   | coding    |
| MSTRG.17972.8  | 1.51624   | coding    |
| MSTRG.17972.9  | 1.5226    | coding    |
| MSTRG.17972.11 | 1.51335   | coding    |
| MSTRG.17973.1  | -0.622729 | noncoding |
| MSTRG.17975.1  | 2.17575   | coding    |
| MSTRG.17978.2  | 3.29518   | coding    |
| MSTRG.17980.2  | 1.84141   | coding    |
| MSTRG.17980.3  | 1.28355   | coding    |
| MSTRG.17981.1  | -0.730127 | noncoding |
| MSTRG.17982.2  | 0.697412  | coding    |
| MSTRG.17984.8  | 1.31628   | coding    |
| MSTRG.17984.7  | 1.28753   | coding    |
| MSTRG.17984.10 | 1.33194   | coding    |
| MSTRG.17985.1  | -1.11547  | noncoding |
| MSTRG.17986.2  | 1.08405   | coding    |
| MSTRG.17987.3  | 0.925358  | coding    |
| MSTRG.17987.4  | 1.15902   | coding    |
| MSTRG.17987.5  | 1.59653   | coding    |
| MSTRG.17988.1  | -1.59589  | noncoding |
| MSTRG.17989.1  | -0.335561 | noncoding |
| MSTRG.17999.2  | 2.14013   | coding    |
| MSTRG.17999.3  | 1.95631   | coding    |
| MSTRG.17999.5  | 1.5047    | coding    |
| MSTRG.17995.1  | -1.26157  | noncoding |
| MSTRG.17996.1  | -0.311464 | noncoding |
| MSTRG.17998.1  | -1.20825  | noncoding |
| MSTRG.18002.1  | 0.368906  | coding    |
| MSTRG.18015.1  | 0.192025  | coding    |

|                |           |           |
|----------------|-----------|-----------|
| MSTRG.18019.1  | -1.05664  | noncoding |
| MSTRG.18024.4  | 1.0105    | coding    |
| MSTRG.18024.9  | 1.15427   | coding    |
| MSTRG.18024.11 | 0.068702  | coding    |
| MSTRG.18024.12 | 0.160312  | coding    |
| MSTRG.18024.13 | 0.413449  | coding    |
| MSTRG.18025.1  | 0.489139  | coding    |
| MSTRG.18026.2  | 0.443418  | coding    |
| MSTRG.18023.2  | 2.23853   | coding    |
| MSTRG.18031.3  | 1.36895   | coding    |
| MSTRG.18031.4  | 1.52024   | coding    |
| MSTRG.18032.1  | 1.18084   | coding    |
| MSTRG.18033.1  | 0.746533  | coding    |
| MSTRG.18037.2  | -0.0715   | noncoding |
| MSTRG.18038.3  | 1.67778   | coding    |
| MSTRG.18038.2  | 2.41478   | coding    |
| MSTRG.18040.7  | 0.643147  | coding    |
| MSTRG.18040.10 | 1.67968   | coding    |
| MSTRG.18040.9  | 1.50567   | coding    |
| MSTRG.18040.12 | 1.32204   | coding    |
| MSTRG.18040.13 | 1.55243   | coding    |
| MSTRG.18040.4  | 1.2738    | coding    |
| MSTRG.18040.8  | 1.39736   | coding    |
| MSTRG.18046.1  | -1.35068  | noncoding |
| MSTRG.18050.1  | 0.299272  | coding    |
| MSTRG.18051.1  | -2.05976  | noncoding |
| MSTRG.18054.3  | 0.016881  | coding    |
| MSTRG.18052.1  | -0.22247  | noncoding |
| MSTRG.18063.1  | 1.45063   | coding    |
| MSTRG.18063.2  | 1.50908   | coding    |
| MSTRG.18063.3  | 1.3906    | coding    |
| MSTRG.18063.5  | 1.7646    | coding    |
| MSTRG.18064.2  | 1.05273   | coding    |
| MSTRG.18066.7  | 1.10796   | coding    |
| MSTRG.18066.5  | 1.05064   | coding    |
| MSTRG.18066.6  | 0.990036  | coding    |
| MSTRG.18060.1  | 1.08841   | coding    |
| MSTRG.18068.1  | -0.091181 | noncoding |
| MSTRG.18068.3  | -0.191261 | noncoding |
| MSTRG.18068.4  | -0.001788 | noncoding |
| MSTRG.18069.1  | 1.59619   | coding    |
| MSTRG.18069.2  | -0.388481 | noncoding |
| MSTRG.18070.1  | -2.22227  | noncoding |
| MSTRG.18069.4  | 1.5519    | coding    |
| MSTRG.18069.5  | 1.62369   | coding    |
| MSTRG.18073.1  | 0.318356  | coding    |
| MSTRG.18072.2  | 1.35388   | coding    |
| MSTRG.18072.4  | 0.621223  | coding    |
| MSTRG.18072.8  | 0.414586  | coding    |
| MSTRG.18074.2  | 0.902739  | coding    |
| MSTRG.18093.6  | 0.189298  | coding    |
| MSTRG.18093.2  | -0.594558 | noncoding |
| MSTRG.18093.4  | -0.195544 | noncoding |
| MSTRG.18093.8  | -0.831719 | noncoding |

|               |           |           |
|---------------|-----------|-----------|
| MSTRG.18095.4 | 1.25213   | coding    |
| MSTRG.18098.1 | 0.685431  | coding    |
| MSTRG.18099.2 | 1.04924   | coding    |
| MSTRG.18101.1 | 0.017693  | coding    |
| MSTRG.18101.2 | -0.270524 | noncoding |
| MSTRG.18102.3 | -0.566381 | noncoding |
| MSTRG.18103.1 | 0.017212  | coding    |
| MSTRG.18105.1 | -0.205834 | noncoding |
| MSTRG.18106.1 | -1.1551   | noncoding |
| MSTRG.18083.2 | 0.142068  | coding    |
| MSTRG.18083.3 | 0.175396  | coding    |
| MSTRG.18085.2 | -1.4679   | noncoding |
| MSTRG.18089.1 | -0.253554 | noncoding |
| MSTRG.18091.3 | 0.683669  | coding    |
| MSTRG.18089.2 | -0.66288  | noncoding |
| MSTRG.18122.1 | -0.871782 | noncoding |
| MSTRG.18129.1 | 2.72589   | coding    |
| MSTRG.18130.3 | 1.46471   | coding    |
| MSTRG.18130.4 | 1.37169   | coding    |
| MSTRG.18131.5 | 2.49476   | coding    |
| MSTRG.18131.4 | 2.33058   | coding    |
| MSTRG.18131.3 | 2.32867   | coding    |
| MSTRG.18131.6 | 1.58617   | coding    |
| MSTRG.18132.1 | -1.14965  | noncoding |
| MSTRG.18135.1 | 2.12899   | coding    |
| MSTRG.18137.1 | -1.14304  | noncoding |
| MSTRG.18137.2 | -1.14123  | noncoding |
| MSTRG.18138.2 | -1.10551  | noncoding |
| MSTRG.18138.1 | -0.491636 | noncoding |
| MSTRG.18148.9 | -0.538856 | noncoding |
| MSTRG.18149.1 | -2.46523  | noncoding |
| MSTRG.18151.1 | 1.33597   | coding    |
| MSTRG.18152.2 | 1.6731    | coding    |
| MSTRG.18152.3 | 0.483866  | coding    |
| MSTRG.18152.4 | -0.167016 | noncoding |
| MSTRG.18153.1 | 2.02604   | coding    |
| MSTRG.18153.2 | 2.38087   | coding    |
| MSTRG.18142.3 | 0.827615  | coding    |
| MSTRG.18147.2 | 2.04888   | coding    |
| MSTRG.18140.1 | -2.17184  | noncoding |
| MSTRG.18140.2 | -1.7918   | noncoding |
| MSTRG.18155.1 | 0.65303   | coding    |
| MSTRG.18155.2 | -0.274583 | noncoding |
| MSTRG.18156.1 | -0.167616 | noncoding |
| MSTRG.18157.1 | -0.166895 | noncoding |
| MSTRG.18158.3 | -0.197077 | noncoding |
| MSTRG.18159.1 | 0.197075  | coding    |
| MSTRG.18161.4 | 1.51135   | coding    |
| MSTRG.18162.2 | 1.59979   | coding    |
| MSTRG.18164.1 | 2.64097   | coding    |
| MSTRG.18169.1 | 0.707724  | coding    |
| MSTRG.18170.3 | 0.907347  | coding    |
| MSTRG.18174.1 | -1.54144  | noncoding |
| MSTRG.18174.5 | -1.99222  | noncoding |

|                  |            |           |
|------------------|------------|-----------|
| MSTRG. 18173. 1  | -1. 37356  | noncoding |
| MSTRG. 18173. 2  | -1. 45501  | noncoding |
| MSTRG. 18176. 2  | -2. 00079  | noncoding |
| MSTRG. 18177. 2  | -0. 298278 | noncoding |
| MSTRG. 18183. 4  | -0. 335079 | noncoding |
| MSTRG. 18191. 1  | -1. 56554  | noncoding |
| MSTRG. 18191. 2  | -0. 982101 | noncoding |
| MSTRG. 18191. 3  | -1. 03678  | noncoding |
| MSTRG. 18191. 4  | -1. 46455  | noncoding |
| MSTRG. 18185. 1  | -0. 259633 | noncoding |
| MSTRG. 18196. 2  | -0. 884404 | noncoding |
| MSTRG. 18196. 3  | -1. 88338  | noncoding |
| MSTRG. 18196. 4  | -1. 61978  | noncoding |
| MSTRG. 18198. 1  | -1. 07015  | noncoding |
| MSTRG. 18200. 2  | -0. 571078 | noncoding |
| MSTRG. 18200. 3  | -0. 474236 | noncoding |
| MSTRG. 18200. 4  | -0. 626455 | noncoding |
| MSTRG. 18200. 5  | -0. 780175 | noncoding |
| MSTRG. 18201. 2  | 1. 49669   | coding    |
| MSTRG. 18219. 2  | 1. 27517   | coding    |
| MSTRG. 18219. 1  | 1. 23343   | coding    |
| MSTRG. 18219. 3  | 1. 63763   | coding    |
| MSTRG. 18219. 4  | 1. 71796   | coding    |
| MSTRG. 18219. 5  | 1. 52592   | coding    |
| MSTRG. 18219. 6  | 1. 82748   | coding    |
| MSTRG. 18219. 8  | 1. 87197   | coding    |
| MSTRG. 18210. 1  | -0. 550624 | noncoding |
| MSTRG. 18211. 4  | 1. 33111   | coding    |
| MSTRG. 18212. 2  | -0. 298961 | noncoding |
| MSTRG. 18214. 1  | 1. 39229   | coding    |
| MSTRG. 18214. 2  | 0. 708398  | coding    |
| MSTRG. 18215. 1  | -0. 443587 | noncoding |
| MSTRG. 18220. 2  | 2. 7223    | coding    |
| MSTRG. 18226. 2  | 1. 72508   | coding    |
| MSTRG. 18229. 2  | 2. 71507   | coding    |
| MSTRG. 18229. 1  | 2. 64884   | coding    |
| MSTRG. 18229. 5  | 2. 44507   | coding    |
| MSTRG. 18234. 1  | -2. 37428  | noncoding |
| MSTRG. 18240. 1  | 1. 85076   | coding    |
| MSTRG. 18240. 8  | 2. 08206   | coding    |
| MSTRG. 18240. 7  | 1. 89576   | coding    |
| MSTRG. 18240. 9  | 2. 0473    | coding    |
| MSTRG. 18240. 10 | 1. 97687   | coding    |
| MSTRG. 18240. 11 | 1. 85938   | coding    |
| MSTRG. 18241. 1  | 0. 344837  | coding    |
| MSTRG. 18240. 12 | 1. 67427   | coding    |
| MSTRG. 18242. 2  | 2. 52526   | coding    |
| MSTRG. 18242. 4  | 2. 15231   | coding    |
| MSTRG. 18245. 1  | -0. 991045 | noncoding |
| MSTRG. 18245. 2  | -0. 560452 | noncoding |
| MSTRG. 18238. 2  | 2. 74454   | coding    |
| MSTRG. 18239. 1  | -0. 253009 | noncoding |
| MSTRG. 18246. 2  | 1. 59516   | coding    |
| MSTRG. 18246. 3  | 1. 6366    | coding    |

|                |           |           |
|----------------|-----------|-----------|
| MSTRG.18252.2  | 2.67256   | coding    |
| MSTRG.18253.2  | 2.92436   | coding    |
| MSTRG.18251.1  | -0.62679  | noncoding |
| MSTRG.18259.2  | 1.32886   | coding    |
| MSTRG.18261.1  | -0.436217 | noncoding |
| MSTRG.18269.10 | -1.59095  | noncoding |
| MSTRG.18269.8  | -1.56486  | noncoding |
| MSTRG.18269.6  | -1.50489  | noncoding |
| MSTRG.18269.13 | -1.31512  | noncoding |
| MSTRG.18269.3  | -1.10183  | noncoding |
| MSTRG.18269.7  | -0.551009 | noncoding |
| MSTRG.18269.11 | -1.23663  | noncoding |
| MSTRG.18269.12 | -0.68396  | noncoding |
| MSTRG.18269.1  | 0.434518  | coding    |
| MSTRG.18269.14 | 0.175818  | coding    |
| MSTRG.18269.2  | 0.657764  | coding    |
| MSTRG.18269.4  | 0.443497  | coding    |
| MSTRG.18269.5  | 0.167609  | coding    |
| MSTRG.18269.9  | 0.517447  | coding    |
| MSTRG.18275.1  | 0.280246  | coding    |
| MSTRG.18276.4  | 0.500061  | coding    |
| MSTRG.18276.3  | 0.467009  | coding    |
| MSTRG.18277.1  | 1.63844   | coding    |
| MSTRG.18277.4  | 1.49627   | coding    |
| MSTRG.18278.1  | -0.511267 | noncoding |
| MSTRG.18270.2  | 2.37101   | coding    |
| MSTRG.18274.1  | -0.999522 | noncoding |
| MSTRG.18274.2  | 0.075646  | coding    |
| MSTRG.18274.3  | -0.169757 | noncoding |
| MSTRG.18274.4  | -0.018849 | noncoding |
| MSTRG.18273.2  | -0.726694 | noncoding |
| MSTRG.18292.2  | 2.24592   | coding    |
| MSTRG.18292.3  | 2.05174   | coding    |
| MSTRG.18294.2  | 0.290549  | coding    |
| MSTRG.18294.5  | 1.14837   | coding    |
| MSTRG.18329.1  | -1.11397  | noncoding |
| MSTRG.18346.1  | -1.27697  | noncoding |
| MSTRG.18346.2  | -0.573258 | noncoding |
| MSTRG.18346.3  | -0.560819 | noncoding |
| MSTRG.18347.1  | 0.458689  | coding    |
| MSTRG.18348.1  | 2.44558   | coding    |
| MSTRG.18348.2  | 0.674661  | coding    |
| MSTRG.18349.1  | 0.313093  | coding    |
| MSTRG.18350.1  | 0.189478  | coding    |
| MSTRG.18350.2  | 0.222574  | coding    |
| MSTRG.18350.3  | 0.482598  | coding    |
| MSTRG.18351.1  | 0.315208  | coding    |
| MSTRG.18348.3  | 2.27299   | coding    |
| MSTRG.18352.1  | 0.029893  | coding    |
| MSTRG.18353.1  | -0.186582 | noncoding |
| MSTRG.18354.1  | -0.559959 | noncoding |
| MSTRG.18355.1  | 0.299031  | coding    |
| MSTRG.18297.2  | 2.9181    | coding    |
| MSTRG.18297.3  | 2.89999   | coding    |

|               |           |           |
|---------------|-----------|-----------|
| MSTRG.18297.6 | 1.85429   | coding    |
| MSTRG.18297.5 | 1.70334   | coding    |
| MSTRG.18299.2 | -0.386619 | noncoding |
| MSTRG.18299.3 | 0.518273  | coding    |
| MSTRG.18304.1 | -2.37933  | noncoding |
| MSTRG.18306.2 | -0.122051 | noncoding |
| MSTRG.18306.3 | -0.568866 | noncoding |
| MSTRG.18307.1 | -1.95227  | noncoding |
| MSTRG.18321.1 | -0.276736 | noncoding |
| MSTRG.18369.2 | 1.77421   | coding    |
| MSTRG.18369.5 | 0.888779  | coding    |
| MSTRG.18369.4 | 1.34737   | coding    |
| MSTRG.18369.3 | 1.29037   | coding    |
| MSTRG.18371.2 | -0.536958 | noncoding |
| MSTRG.18373.1 | -1.68785  | noncoding |
| MSTRG.18378.2 | 0.878665  | coding    |
| MSTRG.18379.6 | 0.87199   | coding    |
| MSTRG.18381.3 | 1.03842   | coding    |
| MSTRG.18381.4 | 0.994067  | coding    |
| MSTRG.18382.3 | 1.13418   | coding    |
| MSTRG.18382.4 | 1.59822   | coding    |
| MSTRG.18383.3 | 1.11839   | coding    |
| MSTRG.18383.1 | 0.987535  | coding    |
| MSTRG.18386.1 | 0.907992  | coding    |
| MSTRG.18386.2 | 0.750724  | coding    |
| MSTRG.18398.5 | 2.1576    | coding    |
| MSTRG.18400.4 | 0.853929  | coding    |
| MSTRG.18400.3 | 1.75379   | coding    |
| MSTRG.18400.5 | 1.58533   | coding    |
| MSTRG.18400.7 | 1.56714   | coding    |
| MSTRG.18400.6 | 1.65219   | coding    |
| MSTRG.18400.9 | 1.59634   | coding    |
| MSTRG.18401.1 | 0.437976  | coding    |
| MSTRG.18405.1 | 0.209146  | coding    |
| MSTRG.18406.1 | 2.21715   | coding    |
| MSTRG.18408.1 | 0.365467  | coding    |
| MSTRG.18408.3 | -0.102698 | noncoding |
| MSTRG.18408.4 | -0.58769  | noncoding |
| MSTRG.18413.2 | 0.564492  | coding    |
| MSTRG.18413.3 | 0.408875  | coding    |
| MSTRG.18414.1 | 1.81356   | coding    |
| MSTRG.18416.4 | 0.98522   | coding    |
| MSTRG.18416.5 | 0.590127  | coding    |
| MSTRG.18416.6 | 0.43565   | coding    |
| MSTRG.18417.1 | 1.13233   | coding    |
| MSTRG.18417.3 | 0.282806  | coding    |
| MSTRG.18433.6 | 1.37336   | coding    |
| MSTRG.18433.7 | 1.38926   | coding    |
| MSTRG.18434.3 | 1.67581   | coding    |
| MSTRG.18435.1 | 2.47686   | coding    |
| MSTRG.18435.2 | 2.29468   | coding    |
| MSTRG.18438.1 | -0.139732 | noncoding |
| MSTRG.18438.2 | -0.146821 | noncoding |
| MSTRG.18447.3 | 1.12615   | coding    |

|                  |            |           |
|------------------|------------|-----------|
| MSTRG. 18448. 1  | 0. 047677  | coding    |
| MSTRG. 18448. 2  | -1. 10792  | noncoding |
| MSTRG. 18447. 5  | 1. 61581   | coding    |
| MSTRG. 18424. 4  | 1. 2334    | coding    |
| MSTRG. 18424. 3  | 1. 53728   | coding    |
| MSTRG. 18424. 2  | 1. 59458   | coding    |
| MSTRG. 18425. 1  | 0. 261878  | coding    |
| MSTRG. 18425. 2  | -0. 380335 | noncoding |
| MSTRG. 18425. 4  | 0. 700147  | coding    |
| MSTRG. 18425. 3  | 0. 500044  | coding    |
| MSTRG. 18428. 3  | 0. 953481  | coding    |
| MSTRG. 18428. 2  | 1. 66802   | coding    |
| MSTRG. 18428. 4  | -0. 260963 | noncoding |
| MSTRG. 18428. 5  | -0. 292641 | noncoding |
| MSTRG. 18452. 2  | -1. 20569  | noncoding |
| MSTRG. 18449. 1  | -1. 27199  | noncoding |
| MSTRG. 18449. 2  | -1. 48055  | noncoding |
| MSTRG. 18453. 2  | -0. 661813 | noncoding |
| MSTRG. 18454. 2  | -0. 284867 | noncoding |
| MSTRG. 18454. 1  | -0. 438559 | noncoding |
| MSTRG. 18454. 3  | -0. 407414 | noncoding |
| MSTRG. 18459. 1  | 0. 037896  | coding    |
| MSTRG. 18462. 1  | 1. 75329   | coding    |
| MSTRG. 18462. 5  | 1. 84379   | coding    |
| MSTRG. 18462. 7  | 1. 78905   | coding    |
| MSTRG. 18455. 1  | 1. 2719    | coding    |
| MSTRG. 18464. 1  | -0. 369998 | noncoding |
| MSTRG. 18466. 1  | -0. 19262  | noncoding |
| MSTRG. 18465. 3  | 1. 95877   | coding    |
| MSTRG. 18465. 2  | 1. 9026    | coding    |
| MSTRG. 18465. 5  | 2. 03898   | coding    |
| MSTRG. 18465. 4  | 2. 03103   | coding    |
| MSTRG. 18468. 2  | 1. 21749   | coding    |
| MSTRG. 18470. 4  | 1. 47776   | coding    |
| MSTRG. 18470. 6  | 0. 201733  | coding    |
| MSTRG. 18470. 8  | -0. 814282 | noncoding |
| MSTRG. 18470. 9  | 0. 983469  | coding    |
| MSTRG. 18470. 11 | -0. 108579 | noncoding |
| MSTRG. 18469. 2  | 1. 90077   | coding    |
| MSTRG. 18477. 2  | 2. 7243    | coding    |
| MSTRG. 18477. 1  | 2. 69254   | coding    |
| MSTRG. 18477. 3  | 2. 79292   | coding    |
| MSTRG. 18477. 4  | 2. 55861   | coding    |
| MSTRG. 18477. 5  | 2. 77536   | coding    |
| MSTRG. 18477. 6  | 2. 73934   | coding    |
| MSTRG. 18477. 7  | 2. 67725   | coding    |
| MSTRG. 18477. 8  | 2. 78205   | coding    |
| MSTRG. 18477. 9  | 2. 69171   | coding    |
| MSTRG. 18477. 10 | 2. 77702   | coding    |
| MSTRG. 18477. 11 | -2. 33088  | noncoding |
| MSTRG. 18477. 12 | 1. 88691   | coding    |
| MSTRG. 18478. 1  | -0. 714356 | noncoding |
| MSTRG. 18477. 14 | 1. 50363   | coding    |
| MSTRG. 18479. 1  | -0. 320076 | noncoding |

|                |           |           |
|----------------|-----------|-----------|
| MSTRG.18479.2  | -0.462644 | noncoding |
| MSTRG.18472.8  | 1.84147   | coding    |
| MSTRG.18473.1  | -0.677222 | noncoding |
| MSTRG.18472.12 | 1.64205   | coding    |
| MSTRG.18474.2  | -0.948302 | noncoding |
| MSTRG.18481.1  | 2.91923   | coding    |
| MSTRG.18482.1  | -0.75478  | noncoding |
| MSTRG.18483.2  | -2.04588  | noncoding |
| MSTRG.18484.1  | -1.07445  | noncoding |
| MSTRG.18484.2  | -0.853545 | noncoding |
| MSTRG.18484.3  | -0.906438 | noncoding |
| MSTRG.18480.2  | 1.74144   | coding    |
| MSTRG.18485.1  | -1.89736  | noncoding |
| MSTRG.18487.1  | -2.11706  | noncoding |
| MSTRG.18487.2  | 0.421388  | coding    |
| MSTRG.18492.2  | 1.79455   | coding    |
| MSTRG.18490.1  | -1.33181  | noncoding |
| MSTRG.18499.2  | 0.96697   | coding    |
| MSTRG.18500.1  | -1.77149  | noncoding |
| MSTRG.18504.1  | 0.14534   | coding    |
| MSTRG.18507.4  | 1.32359   | coding    |
| MSTRG.18507.5  | 1.1597    | coding    |
| MSTRG.18507.6  | 0.371706  | coding    |
| MSTRG.18508.2  | -0.104056 | noncoding |
| MSTRG.18508.3  | -0.511662 | noncoding |
| MSTRG.18511.1  | 1.38678   | coding    |
| MSTRG.18511.2  | 1.93582   | coding    |
| MSTRG.18511.3  | 2.04624   | coding    |
| MSTRG.18511.4  | 2.04134   | coding    |
| MSTRG.18513.3  | 1.57237   | coding    |
| MSTRG.18513.2  | 1.28883   | coding    |
| MSTRG.18516.2  | 2.67639   | coding    |
| MSTRG.18516.5  | 2.66355   | coding    |
| MSTRG.18517.1  | -0.378231 | noncoding |
| MSTRG.18514.2  | 1.54149   | coding    |
| MSTRG.18514.3  | 1.52271   | coding    |
| MSTRG.18514.4  | 1.8669    | coding    |
| MSTRG.18519.1  | -2.54978  | noncoding |
| MSTRG.18524.1  | 1.73924   | coding    |
| MSTRG.18524.2  | 3.07535   | coding    |
| MSTRG.18524.4  | 1.89968   | coding    |
| MSTRG.18527.1  | 2.93639   | coding    |
| MSTRG.18527.2  | -1.46851  | noncoding |
| MSTRG.18529.3  | 1.8219    | coding    |
| MSTRG.18529.5  | 0.836769  | coding    |
| MSTRG.18529.4  | 1.18024   | coding    |
| MSTRG.18530.1  | -0.186244 | noncoding |
| MSTRG.18530.2  | -0.172693 | noncoding |
| MSTRG.18531.1  | 0.33048   | coding    |
| MSTRG.18536.1  | -2.38387  | noncoding |
| MSTRG.18538.1  | -2.41092  | noncoding |
| MSTRG.18540.1  | -2.09983  | noncoding |
| MSTRG.18600.2  | 0.072363  | coding    |
| MSTRG.18614.1  | -0.326605 | noncoding |



|                |           |           |
|----------------|-----------|-----------|
| MSTRG.18615.1  | -1.1565   | noncoding |
| MSTRG.18626.2  | -1.0279   | noncoding |
| MSTRG.18622.6  | -0.066087 | noncoding |
| MSTRG.18622.7  | -0.828775 | noncoding |
| MSTRG.18631.2  | 0.335617  | coding    |
| MSTRG.18631.3  | -0.257657 | noncoding |
| MSTRG.18632.1  | -0.939276 | noncoding |
| MSTRG.18631.4  | -0.123193 | noncoding |
| MSTRG.18633.1  | -2.32505  | noncoding |
| MSTRG.18622.8  | -0.594201 | noncoding |
| MSTRG.18622.14 | -0.641327 | noncoding |
| MSTRG.18631.6  | -0.058054 | noncoding |
| MSTRG.18631.7  | -2.30098  | noncoding |
| MSTRG.18622.16 | -2.05584  | noncoding |
| MSTRG.18622.17 | 1.05452   | coding    |
| MSTRG.18631.9  | -0.03572  | noncoding |
| MSTRG.18631.8  | 0.268799  | coding    |
| MSTRG.18622.20 | 0.681584  | coding    |
| MSTRG.18622.21 | 0.670784  | coding    |
| MSTRG.18622.22 | -1.73458  | noncoding |
| MSTRG.18631.10 | -0.666837 | noncoding |
| MSTRG.18622.34 | 0.281292  | coding    |
| MSTRG.18638.1  | -1.28839  | noncoding |
| MSTRG.18637.1  | -2.24272  | noncoding |
| MSTRG.18542.3  | 2.08466   | coding    |
| MSTRG.18546.4  | 0.571189  | coding    |
| MSTRG.18546.5  | 0.535419  | coding    |
| MSTRG.18546.6  | 0.372742  | coding    |
| MSTRG.18546.7  | -0.127115 | noncoding |
| MSTRG.18546.8  | 0.444261  | coding    |
| MSTRG.18546.9  | 0.482949  | coding    |
| MSTRG.18546.10 | 0.549243  | coding    |
| MSTRG.18546.11 | 0.564658  | coding    |
| MSTRG.18546.12 | 0.583051  | coding    |
| MSTRG.18546.13 | 0.967625  | coding    |
| MSTRG.18546.14 | 1.20877   | coding    |
| MSTRG.18548.2  | -2.32885  | noncoding |
| MSTRG.18551.1  | 0.134157  | coding    |
| MSTRG.18552.1  | -0.302835 | noncoding |
| MSTRG.18552.2  | -0.040033 | noncoding |
| MSTRG.18555.1  | 1.38415   | coding    |
| MSTRG.18555.2  | 0.722132  | coding    |
| MSTRG.18557.4  | 0.998087  | coding    |
| MSTRG.18558.1  | -1.41332  | noncoding |
| MSTRG.18559.1  | 1.51124   | coding    |
| MSTRG.18559.4  | 1.19818   | coding    |
| MSTRG.18559.6  | 1.54485   | coding    |
| MSTRG.18561.1  | 2.28655   | coding    |
| MSTRG.18561.3  | 0.394017  | coding    |
| MSTRG.18562.1  | 0.199312  | coding    |
| MSTRG.18562.2  | 0.282058  | coding    |
| MSTRG.18562.3  | 1.03239   | coding    |
| MSTRG.18563.1  | -1.97792  | noncoding |
| MSTRG.18564.1  | 2.20266   | coding    |

|                |           |           |
|----------------|-----------|-----------|
| MSTRG.18564.2  | 2.25663   | coding    |
| MSTRG.18565.1  | -0.233607 | noncoding |
| MSTRG.18565.2  | 0.177616  | coding    |
| MSTRG.18568.1  | 3.51193   | coding    |
| MSTRG.18568.3  | 3.06779   | coding    |
| MSTRG.18568.6  | 2.40156   | coding    |
| MSTRG.18572.1  | 1.57622   | coding    |
| MSTRG.18572.4  | 1.56523   | coding    |
| MSTRG.18574.4  | 2.14898   | coding    |
| MSTRG.18574.5  | 2.2211    | coding    |
| MSTRG.18574.6  | 2.22771   | coding    |
| MSTRG.18574.7  | 1.12458   | coding    |
| MSTRG.18567.2  | 1.15135   | coding    |
| MSTRG.18589.1  | -2.12935  | noncoding |
| MSTRG.18590.1  | -2.3325   | noncoding |
| MSTRG.18594.2  | -0.427634 | noncoding |
| MSTRG.18594.3  | -1.12839  | noncoding |
| MSTRG.18594.5  | -0.542979 | noncoding |
| MSTRG.18594.6  | -0.886277 | noncoding |
| MSTRG.18594.7  | -0.689044 | noncoding |
| MSTRG.18654.3  | 0.142277  | coding    |
| MSTRG.18654.4  | 2.67524   | coding    |
| MSTRG.18656.1  | -1.96111  | noncoding |
| MSTRG.18645.1  | 0.566712  | coding    |
| MSTRG.18647.2  | 0.426827  | coding    |
| MSTRG.18653.1  | -2.19202  | noncoding |
| MSTRG.18659.1  | 1.73206   | coding    |
| MSTRG.18659.5  | 0.989718  | coding    |
| MSTRG.18662.5  | 2.47959   | coding    |
| MSTRG.18662.3  | 2.64998   | coding    |
| MSTRG.18666.8  | 0.256719  | coding    |
| MSTRG.18666.9  | 0.237506  | coding    |
| MSTRG.18666.4  | 0.955251  | coding    |
| MSTRG.18666.5  | 0.901831  | coding    |
| MSTRG.18666.6  | 0.882843  | coding    |
| MSTRG.18666.7  | 0.758879  | coding    |
| MSTRG.18666.10 | 0.423922  | coding    |
| MSTRG.18667.2  | 0.693599  | coding    |
| MSTRG.18677.1  | -1.75321  | noncoding |
| MSTRG.18679.3  | -1.72304  | noncoding |
| MSTRG.18681.1  | -2.20427  | noncoding |
| MSTRG.18684.2  | 1.07256   | coding    |
| MSTRG.18685.1  | -2.2629   | noncoding |
| MSTRG.18698.1  | -0.253684 | noncoding |
| MSTRG.18697.4  | 0.372456  | coding    |
| MSTRG.18702.2  | 1.30437   | coding    |
| MSTRG.18703.1  | 0.107794  | coding    |
| MSTRG.18704.1  | 0.149625  | coding    |
| MSTRG.18705.1  | -1.13331  | noncoding |
| MSTRG.18706.1  | 0.605743  | coding    |
| MSTRG.18707.1  | 0.370323  | coding    |
| MSTRG.18709.2  | 1.52188   | coding    |
| MSTRG.18709.3  | 1.52522   | coding    |
| MSTRG.18709.4  | 0.689424  | coding    |

|               |           |           |
|---------------|-----------|-----------|
| MSTRG.18711.4 | 0.902442  | coding    |
| MSTRG.18713.1 | -2.39702  | noncoding |
| MSTRG.18715.2 | 0.143745  | coding    |
| MSTRG.18715.4 | 0.546516  | coding    |
| MSTRG.18722.1 | -0.469171 | noncoding |
| MSTRG.18725.6 | 1.90772   | coding    |
| MSTRG.18725.7 | 1.93299   | coding    |
| MSTRG.18726.1 | -1.95567  | noncoding |
| MSTRG.18718.1 | -1.29577  | noncoding |
| MSTRG.18732.2 | 0.496103  | coding    |
| MSTRG.18733.1 | 0.226777  | coding    |
| MSTRG.18734.1 | 0.400852  | coding    |
| MSTRG.18734.2 | 1.07516   | coding    |
| MSTRG.18741.3 | 0.982433  | coding    |
| MSTRG.18743.3 | -0.748048 | noncoding |
| MSTRG.18744.1 | 1.41214   | coding    |
| MSTRG.18749.1 | 3.28139   | coding    |
| MSTRG.18749.2 | 2.99832   | coding    |
| MSTRG.18749.3 | 2.89964   | coding    |
| MSTRG.18750.1 | -0.450157 | noncoding |
| MSTRG.18751.2 | -0.157941 | noncoding |
| MSTRG.18751.4 | -0.583054 | noncoding |
| MSTRG.18752.1 | 0.901219  | coding    |
| MSTRG.18752.2 | 0.606563  | coding    |
| MSTRG.18762.2 | 0.658476  | coding    |
| MSTRG.18762.1 | 0.92016   | coding    |
| MSTRG.18763.1 | 2.69178   | coding    |
| MSTRG.18762.3 | -0.152088 | noncoding |
| MSTRG.18764.1 | -0.726761 | noncoding |
| MSTRG.18762.4 | -0.135322 | noncoding |
| MSTRG.18763.2 | 2.16211   | coding    |
| MSTRG.18763.4 | 2.41909   | coding    |
| MSTRG.18763.5 | 2.41573   | coding    |
| MSTRG.18763.7 | 1.88735   | coding    |
| MSTRG.18768.2 | 2.75108   | coding    |
| MSTRG.18756.1 | -0.074234 | noncoding |
| MSTRG.18761.1 | 1.44671   | coding    |
| MSTRG.18769.5 | 1.25017   | coding    |
| MSTRG.18769.6 | 1.37829   | coding    |
| MSTRG.18770.1 | 0.411406  | coding    |
| MSTRG.18771.1 | -0.029769 | noncoding |
| MSTRG.18772.1 | -3.11948  | noncoding |
| MSTRG.18773.1 | -1.52983  | noncoding |
| MSTRG.18776.1 | -1.00034  | noncoding |
| MSTRG.18805.1 | 0.714703  | coding    |
| MSTRG.18805.2 | 0.032845  | coding    |
| MSTRG.18816.4 | 0.301814  | coding    |
| MSTRG.18816.5 | 0.116278  | coding    |
| MSTRG.18818.2 | 0.419389  | coding    |
| MSTRG.18825.7 | 1.10588   | coding    |
| MSTRG.18829.1 | -0.023163 | noncoding |
| MSTRG.18821.1 | -0.853791 | noncoding |
| MSTRG.18822.4 | 1.38427   | coding    |
| MSTRG.18830.2 | 0.822532  | coding    |

|               |           |           |
|---------------|-----------|-----------|
| MSTRG.18830.3 | -1.93816  | noncoding |
| MSTRG.18838.1 | -1.36029  | noncoding |
| MSTRG.18841.1 | -0.833439 | noncoding |
| MSTRG.18850.1 | -2.63627  | noncoding |
| MSTRG.18852.1 | 2.51269   | coding    |
| MSTRG.18861.1 | -1.04341  | noncoding |
| MSTRG.18862.1 | -2.26277  | noncoding |
| MSTRG.18872.1 | -1.92301  | noncoding |
| MSTRG.18882.1 | -1.84774  | noncoding |
| MSTRG.18894.1 | -1.90038  | noncoding |
| MSTRG.18894.4 | -1.78703  | noncoding |
| MSTRG.18894.6 | -1.76214  | noncoding |
| MSTRG.18894.7 | -1.48219  | noncoding |
| MSTRG.18894.3 | -1.928    | noncoding |
| MSTRG.18894.5 | -1.86931  | noncoding |
| MSTRG.18906.1 | 0.427257  | coding    |
| MSTRG.18907.1 | -0.117639 | noncoding |
| MSTRG.18908.1 | -1.81244  | noncoding |
| MSTRG.18911.1 | -2.18813  | noncoding |
| MSTRG.18917.2 | 2.79421   | coding    |
| MSTRG.18917.3 | 2.25933   | coding    |
| MSTRG.18958.1 | -0.924947 | noncoding |
| MSTRG.18967.1 | -0.121799 | noncoding |
| MSTRG.18967.3 | 1.87355   | coding    |
| MSTRG.18955.1 | -0.468599 | noncoding |
| MSTRG.18979.1 | -0.973397 | noncoding |
| MSTRG.18983.2 | 0.955879  | coding    |
| MSTRG.18986.1 | 0.378102  | coding    |
| MSTRG.18987.1 | 1.22471   | coding    |
| MSTRG.18984.2 | -1.68904  | noncoding |
| MSTRG.18997.1 | -0.175298 | noncoding |
| MSTRG.18997.2 | -0.17052  | noncoding |
| MSTRG.18999.1 | -2.19666  | noncoding |
| MSTRG.18999.2 | -0.238582 | noncoding |
| MSTRG.19005.1 | -0.096649 | noncoding |
| MSTRG.19006.1 | 0.531612  | coding    |
| MSTRG.19014.6 | 2.57379   | coding    |
| MSTRG.19014.5 | 2.67603   | coding    |
| MSTRG.19015.1 | -1.15171  | noncoding |
| MSTRG.19015.2 | -2.00762  | noncoding |
| MSTRG.19015.3 | -1.84989  | noncoding |
| MSTRG.19009.1 | -2.58283  | noncoding |
| MSTRG.19024.1 | -2.03147  | noncoding |
| MSTRG.19041.1 | -2.40622  | noncoding |
| MSTRG.19049.1 | 0.446273  | coding    |
| MSTRG.19049.2 | 0.585234  | coding    |
| MSTRG.19049.3 | -2.67197  | noncoding |
| MSTRG.19049.4 | -0.460618 | noncoding |
| MSTRG.19052.2 | 2.34678   | coding    |
| MSTRG.19034.1 | -0.826322 | noncoding |
| MSTRG.19038.1 | -1.35526  | noncoding |
| MSTRG.19039.3 | 1.31262   | coding    |
| MSTRG.19053.2 | 1.63339   | coding    |
| MSTRG.19053.3 | 1.37097   | coding    |

|               |           |           |
|---------------|-----------|-----------|
| MSTRG.19059.4 | 2.82247   | coding    |
| MSTRG.19059.3 | 2.99665   | coding    |
| MSTRG.19061.1 | 0.654242  | coding    |
| MSTRG.19063.1 | -1.97219  | noncoding |
| MSTRG.19066.1 | -0.350257 | noncoding |
| MSTRG.19068.2 | -1.84376  | noncoding |
| MSTRG.19069.1 | 1.3264    | coding    |
| MSTRG.19069.2 | 1.4562    | coding    |
| MSTRG.19069.4 | 1.79647   | coding    |
| MSTRG.19069.6 | 1.17596   | coding    |
| MSTRG.19072.1 | 2.66414   | coding    |
| MSTRG.19072.2 | 2.2875    | coding    |
| MSTRG.19072.3 | 2.00252   | coding    |
| MSTRG.19072.4 | 2.27012   | coding    |
| MSTRG.19073.3 | -2.39244  | noncoding |
| MSTRG.19075.1 | 0.151637  | coding    |
| MSTRG.19089.2 | 1.9321    | coding    |
| MSTRG.19089.3 | 2.56185   | coding    |
| MSTRG.19090.2 | 1.36675   | coding    |
| MSTRG.19094.1 | 2.66205   | coding    |
| MSTRG.19094.2 | 2.9817    | coding    |
| MSTRG.19094.3 | 2.85952   | coding    |
| MSTRG.19094.5 | 1.50883   | coding    |
| MSTRG.19095.1 | -1.29988  | noncoding |
| MSTRG.19096.1 | 3.11457   | coding    |
| MSTRG.19099.1 | -2.21363  | noncoding |
| MSTRG.19100.1 | -1.79702  | noncoding |
| MSTRG.19101.1 | -1.31922  | noncoding |
| MSTRG.19078.2 | 1.45899   | coding    |
| MSTRG.19078.3 | 1.55071   | coding    |
| MSTRG.19079.1 | 0.979661  | coding    |
| MSTRG.19081.1 | 0.72097   | coding    |
| MSTRG.19083.1 | -1.86517  | noncoding |
| MSTRG.19084.3 | 1.63254   | coding    |
| MSTRG.19085.1 | -1.52804  | noncoding |
| MSTRG.19107.3 | 2.66232   | coding    |
| MSTRG.19110.1 | -1.084    | noncoding |
| MSTRG.19113.4 | 0.459845  | coding    |
| MSTRG.19115.4 | 2.50953   | coding    |
| MSTRG.19115.5 | 2.34843   | coding    |
| MSTRG.19116.2 | 2.69678   | coding    |
| MSTRG.19116.4 | -2.16815  | noncoding |
| MSTRG.19117.2 | 2.53151   | coding    |
| MSTRG.19121.1 | -1.82337  | noncoding |
| MSTRG.19122.1 | -1.78437  | noncoding |
| MSTRG.19126.2 | 1.05461   | coding    |
| MSTRG.19127.1 | -0.806297 | noncoding |
| MSTRG.19129.1 | 0.727791  | coding    |
| MSTRG.19129.2 | 0.81389   | coding    |
| MSTRG.19129.4 | 0.585087  | coding    |
| MSTRG.19129.5 | 1.03448   | coding    |
| MSTRG.19131.8 | -0.303245 | noncoding |
| MSTRG.19131.7 | 1.09591   | coding    |
| MSTRG.19131.4 | 1.28709   | coding    |

|                 |           |           |
|-----------------|-----------|-----------|
| MSTRG. 19131.5  | 1.10781   | coding    |
| MSTRG. 19131.6  | 1.16061   | coding    |
| MSTRG. 19133.3  | -0.008005 | noncoding |
| MSTRG. 19133.4  | 0.158495  | coding    |
| MSTRG. 19134.3  | 1.56413   | coding    |
| MSTRG. 19134.4  | 1.43792   | coding    |
| MSTRG. 19136.1  | -1.29191  | noncoding |
| MSTRG. 19138.1  | 1.94301   | coding    |
| MSTRG. 19142.5  | 1.42966   | coding    |
| MSTRG. 19148.3  | 1.24317   | coding    |
| MSTRG. 19148.4  | 1.203     | coding    |
| MSTRG. 19150.1  | 0.77435   | coding    |
| MSTRG. 19150.2  | 1.29149   | coding    |
| MSTRG. 19152.2  | 2.39845   | coding    |
| MSTRG. 19144.1  | -2.2      | noncoding |
| MSTRG. 19146.1  | -0.731535 | noncoding |
| MSTRG. 19155.1  | -0.961414 | noncoding |
| MSTRG. 19156.1  | -2.25123  | noncoding |
| MSTRG. 19158.4  | 2.97381   | coding    |
| MSTRG. 19175.1  | -1.1258   | noncoding |
| MSTRG. 19177.4  | 0.263466  | coding    |
| MSTRG. 19177.1  | 1.0223    | coding    |
| MSTRG. 19177.3  | 1.2091    | coding    |
| MSTRG. 19177.5  | 0.324362  | coding    |
| MSTRG. 19177.6  | -1.09913  | noncoding |
| MSTRG. 19177.7  | 1.40545   | coding    |
| MSTRG. 19177.8  | 0.775396  | coding    |
| MSTRG. 19177.9  | 0.51898   | coding    |
| MSTRG. 19177.10 | 1.73046   | coding    |
| MSTRG. 19177.12 | 0.038998  | coding    |
| MSTRG. 19177.13 | -0.529314 | noncoding |
| MSTRG. 19183.1  | -0.950394 | noncoding |
| MSTRG. 19183.2  | -1.85566  | noncoding |
| MSTRG. 19189.2  | 0.539206  | coding    |
| MSTRG. 19166.2  | 0.696656  | coding    |
| MSTRG. 19166.3  | 2.86623   | coding    |
| MSTRG. 19168.1  | -0.305074 | noncoding |
| MSTRG. 19169.4  | 1.71313   | coding    |
| MSTRG. 19171.7  | -0.676668 | noncoding |
| MSTRG. 19171.2  | 0.734279  | coding    |
| MSTRG. 19171.3  | 0.925738  | coding    |
| MSTRG. 19171.4  | 0.811026  | coding    |
| MSTRG. 19171.5  | 0.78768   | coding    |
| MSTRG. 19171.6  | 0.55522   | coding    |
| MSTRG. 19194.2  | -0.865861 | noncoding |
| MSTRG. 19196.1  | -0.295533 | noncoding |
| MSTRG. 19196.2  | -0.243864 | noncoding |
| MSTRG. 19203.1  | 1.37886   | coding    |
| MSTRG. 19203.2  | -0.269292 | noncoding |
| MSTRG. 19204.3  | 1.54747   | coding    |
| MSTRG. 19205.1  | 1.08389   | coding    |
| MSTRG. 19205.2  | 1.0516    | coding    |
| MSTRG. 19205.3  | 0.348799  | coding    |
| MSTRG. 19206.1  | -2.68826  | noncoding |

|               |           |           |
|---------------|-----------|-----------|
| MSTRG.19207.2 | -0.694989 | noncoding |
| MSTRG.19210.5 | 1.68906   | coding    |
| MSTRG.19210.6 | 0.670169  | coding    |
| MSTRG.19210.4 | 1.84274   | coding    |
| MSTRG.19210.7 | 1.59293   | coding    |
| MSTRG.19210.3 | 1.88283   | coding    |
| MSTRG.19210.8 | 0.408434  | coding    |
| MSTRG.19197.1 | -0.820569 | noncoding |
| MSTRG.19202.1 | -1.45617  | noncoding |
| MSTRG.19213.1 | 0.25898   | coding    |
| MSTRG.19213.2 | -0.218153 | noncoding |
| MSTRG.19215.1 | -0.40162  | noncoding |
| MSTRG.19217.4 | 1.60059   | coding    |
| MSTRG.19217.2 | 1.82109   | coding    |
| MSTRG.19217.5 | 1.52545   | coding    |
| MSTRG.19218.1 | -1.3553   | noncoding |
| MSTRG.19318.1 | 0.196458  | coding    |
| MSTRG.19319.3 | 0.827275  | coding    |
| MSTRG.19323.1 | -1.59112  | noncoding |
| MSTRG.19319.4 | 0.556536  | coding    |
| MSTRG.19319.5 | 0.928722  | coding    |
| MSTRG.19319.6 | -0.521327 | noncoding |
| MSTRG.19325.1 | -0.401532 | noncoding |
| MSTRG.19325.2 | 0.326387  | coding    |
| MSTRG.19326.1 | 0.243419  | coding    |
| MSTRG.19328.1 | 0.71923   | coding    |
| MSTRG.19338.1 | -1.21191  | noncoding |
| MSTRG.19339.1 | -0.152535 | noncoding |
| MSTRG.19340.1 | -0.131547 | noncoding |
| MSTRG.19342.1 | -0.993501 | noncoding |
| MSTRG.19347.2 | 0.006624  | coding    |
| MSTRG.19339.2 | 1.01391   | coding    |
| MSTRG.19339.3 | 0.766463  | coding    |
| MSTRG.19339.4 | 0.578162  | coding    |
| MSTRG.19339.5 | 0.416964  | coding    |
| MSTRG.19339.6 | 0.21608   | coding    |
| MSTRG.19339.7 | 0.068076  | coding    |
| MSTRG.19339.8 | 1.1603    | coding    |
| MSTRG.19349.1 | -0.714276 | noncoding |
| MSTRG.19221.1 | 0.688128  | coding    |
| MSTRG.19221.2 | -0.20334  | noncoding |
| MSTRG.19230.1 | -0.441836 | noncoding |
| MSTRG.19235.1 | -1.23257  | noncoding |
| MSTRG.19249.1 | -1.88176  | noncoding |
| MSTRG.19249.2 | -1.4897   | noncoding |
| MSTRG.19249.3 | -1.98308  | noncoding |
| MSTRG.19249.4 | 0.608779  | coding    |
| MSTRG.19237.1 | 0.427827  | coding    |
| MSTRG.19252.4 | -0.132141 | noncoding |
| MSTRG.19253.1 | 1.35014   | coding    |
| MSTRG.19253.4 | 0.996825  | coding    |
| MSTRG.19253.5 | -0.273414 | noncoding |
| MSTRG.19254.1 | 0.412323  | coding    |
| MSTRG.19258.1 | -1.20206  | noncoding |

|                |           |           |
|----------------|-----------|-----------|
| MSTRG.19258.2  | -1.77925  | noncoding |
| MSTRG.19264.1  | 0.322455  | coding    |
| MSTRG.19265.1  | 0.014574  | coding    |
| MSTRG.19266.2  | 2.14467   | coding    |
| MSTRG.19270.2  | 1.79086   | coding    |
| MSTRG.19278.1  | -0.592283 | noncoding |
| MSTRG.19281.2  | 1.94148   | coding    |
| MSTRG.19285.2  | 0.781972  | coding    |
| MSTRG.19285.3  | 0.542294  | coding    |
| MSTRG.19285.4  | 0.886795  | coding    |
| MSTRG.19291.1  | -0.432393 | noncoding |
| MSTRG.19291.2  | -0.735992 | noncoding |
| MSTRG.19283.1  | 0.722441  | coding    |
| MSTRG.19283.3  | 1.07476   | coding    |
| MSTRG.19305.4  | 0.642646  | coding    |
| MSTRG.19311.1  | 1.57721   | coding    |
| MSTRG.19311.2  | 3.21699   | coding    |
| MSTRG.19311.4  | -2.06484  | noncoding |
| MSTRG.19311.5  | 2.4542    | coding    |
| MSTRG.19311.6  | 2.05027   | coding    |
| MSTRG.19312.1  | -1.30606  | noncoding |
| MSTRG.19314.1  | 0.98125   | coding    |
| MSTRG.19314.3  | 0.913639  | coding    |
| MSTRG.19314.4  | 0.855428  | coding    |
| MSTRG.19316.1  | 2.52909   | coding    |
| MSTRG.19314.6  | 0.728244  | coding    |
| MSTRG.19316.2  | 2.49766   | coding    |
| MSTRG.19316.3  | 2.54876   | coding    |
| MSTRG.19316.4  | 2.84342   | coding    |
| MSTRG.19317.1  | 1.17491   | coding    |
| MSTRG.19313.1  | 1.24448   | coding    |
| MSTRG.19352.1  | 1.03948   | coding    |
| MSTRG.19352.3  | 2.83197   | coding    |
| MSTRG.19352.4  | 1.62208   | coding    |
| MSTRG.19352.5  | 1.18022   | coding    |
| MSTRG.19352.12 | 0.350846  | coding    |
| MSTRG.19352.10 | 0.678577  | coding    |
| MSTRG.19352.13 | 0.504206  | coding    |
| MSTRG.19352.9  | 0.656457  | coding    |
| MSTRG.19352.8  | 0.718963  | coding    |
| MSTRG.19352.11 | 1.02499   | coding    |
| MSTRG.19352.6  | 0.754224  | coding    |
| MSTRG.19354.1  | 0.034254  | coding    |
| MSTRG.19359.2  | 0.783618  | coding    |
| MSTRG.19359.3  | 0.308088  | coding    |
| MSTRG.19359.4  | 0.675785  | coding    |
| MSTRG.19359.5  | 0.063123  | coding    |
| MSTRG.19361.1  | 1.54743   | coding    |
| MSTRG.19361.2  | 1.72552   | coding    |
| MSTRG.19361.3  | 1.69158   | coding    |
| MSTRG.19361.4  | 1.91495   | coding    |
| MSTRG.19361.5  | 1.5228    | coding    |
| MSTRG.19361.6  | 0.833739  | coding    |
| MSTRG.19361.10 | -0.050611 | noncoding |



|                  |            |           |
|------------------|------------|-----------|
| MSTRG. 19361. 7  | 2. 3817    | coding    |
| MSTRG. 19361. 8  | 2. 90513   | coding    |
| MSTRG. 19361. 9  | 2. 32239   | coding    |
| MSTRG. 19361. 11 | -0. 146129 | noncoding |
| MSTRG. 19361. 12 | -0. 54263  | noncoding |
| MSTRG. 19361. 13 | -0. 641494 | noncoding |
| MSTRG. 19361. 14 | -1. 18906  | noncoding |
| MSTRG. 19363. 1  | -1. 11612  | noncoding |
| MSTRG. 19401. 1  | 0. 003078  | coding    |
| MSTRG. 19402. 1  | -1. 94957  | noncoding |
| MSTRG. 19368. 1  | -2. 32333  | noncoding |
| MSTRG. 19369. 1  | -2. 39847  | noncoding |
| MSTRG. 19370. 1  | -2. 17718  | noncoding |
| MSTRG. 19407. 1  | -1. 55605  | noncoding |
| MSTRG. 19408. 1  | 1. 46638   | coding    |
| MSTRG. 19414. 1  | 1. 98215   | coding    |
| MSTRG. 19414. 2  | 1. 81065   | coding    |
| MSTRG. 19415. 1  | 1. 54748   | coding    |
| MSTRG. 19415. 3  | 1. 6364    | coding    |
| MSTRG. 19415. 4  | 1. 66238   | coding    |
| MSTRG. 19416. 1  | 2. 02186   | coding    |
| MSTRG. 19416. 2  | 0. 146789  | coding    |
| MSTRG. 19413. 1  | -0. 609138 | noncoding |
| MSTRG. 19420. 2  | 1. 9445    | coding    |
| MSTRG. 19422. 1  | 1. 95579   | coding    |
| MSTRG. 19422. 3  | 2. 21095   | coding    |
| MSTRG. 19422. 2  | 2. 25902   | coding    |
| MSTRG. 19422. 4  | 1. 49996   | coding    |
| MSTRG. 19422. 5  | 1. 98158   | coding    |
| MSTRG. 19423. 1  | 0. 425104  | coding    |
| MSTRG. 19425. 1  | 2. 69307   | coding    |
| MSTRG. 19425. 4  | 1. 4908    | coding    |
| MSTRG. 19428. 1  | 2. 34837   | coding    |
| MSTRG. 19432. 1  | -0. 834631 | noncoding |
| MSTRG. 19434. 1  | 1. 83279   | coding    |
| MSTRG. 19435. 1  | 0. 44184   | coding    |
| MSTRG. 19436. 1  | -1. 75803  | noncoding |
| MSTRG. 19440. 2  | 0. 852534  | coding    |
| MSTRG. 19440. 1  | -1. 23474  | noncoding |
| MSTRG. 19441. 1  | -0. 704851 | noncoding |
| MSTRG. 19446. 2  | 1. 88502   | coding    |
| MSTRG. 19464. 1  | 2. 44341   | coding    |
| MSTRG. 19464. 6  | -0. 798754 | noncoding |
| MSTRG. 19478. 2  | 0. 442389  | coding    |
| MSTRG. 19479. 1  | -0. 924077 | noncoding |
| MSTRG. 19448. 1  | -0. 553057 | noncoding |
| MSTRG. 19458. 2  | 0. 372905  | coding    |
| MSTRG. 19458. 4  | 0. 63493   | coding    |
| MSTRG. 19458. 3  | -0. 496996 | noncoding |
| MSTRG. 19458. 5  | 2. 6191    | coding    |
| MSTRG. 19459. 1  | -0. 698965 | noncoding |
| MSTRG. 19481. 1  | 0. 633502  | coding    |
| MSTRG. 19480. 2  | 1. 75682   | coding    |
| MSTRG. 19485. 1  | 0. 924263  | coding    |

|                 |            |           |
|-----------------|------------|-----------|
| MSTRG. 19485. 2 | 1. 88154   | coding    |
| MSTRG. 19485. 3 | -0. 336044 | noncoding |
| MSTRG. 19486. 1 | 0. 655718  | coding    |
| MSTRG. 19490. 5 | 2. 20314   | coding    |
| MSTRG. 19490. 8 | -0. 125079 | noncoding |
| MSTRG. 19491. 1 | -2. 10306  | noncoding |
| MSTRG. 19492. 1 | 0. 918637  | coding    |
| MSTRG. 19493. 1 | -2. 77885  | noncoding |
| MSTRG. 19494. 1 | -1. 90607  | noncoding |
| MSTRG. 19495. 1 | 0. 071911  | coding    |
| MSTRG. 19496. 1 | -1. 16687  | noncoding |
| MSTRG. 19505. 2 | 0. 178642  | coding    |
| MSTRG. 19505. 3 | -0. 303486 | noncoding |
| MSTRG. 19505. 4 | 0. 30828   | coding    |
| MSTRG. 19506. 1 | -0. 728312 | noncoding |
| MSTRG. 19507. 4 | 0. 634343  | coding    |
| MSTRG. 19508. 3 | -1. 05433  | noncoding |
| MSTRG. 19509. 2 | 1. 66176   | coding    |
| MSTRG. 19515. 3 | -0. 836637 | noncoding |
| MSTRG. 19515. 2 | 0. 507426  | coding    |
| MSTRG. 19515. 4 | -1. 23358  | noncoding |
| MSTRG. 19521. 1 | 1. 37672   | coding    |
| MSTRG. 19521. 2 | 1. 10221   | coding    |
| MSTRG. 19522. 4 | 0. 966004  | coding    |
| MSTRG. 19526. 1 | -2. 30023  | noncoding |
| MSTRG. 19530. 1 | 0. 5827    | coding    |
| MSTRG. 19531. 1 | -1. 68541  | noncoding |
| MSTRG. 19526. 2 | 0. 021922  | coding    |
| MSTRG. 19532. 1 | -1. 3572   | noncoding |
| MSTRG. 19516. 1 | -0. 965301 | noncoding |
| MSTRG. 19533. 5 | 0. 000768  | coding    |
| MSTRG. 19533. 6 | -1. 14406  | noncoding |
| MSTRG. 19534. 1 | 0. 465546  | coding    |
| MSTRG. 19533. 7 | 3. 27079   | coding    |
| MSTRG. 19535. 1 | -1. 04285  | noncoding |
| MSTRG. 19538. 1 | -1. 34329  | noncoding |
| MSTRG. 19540. 1 | -0. 855826 | noncoding |
| MSTRG. 19543. 4 | 2. 32068   | coding    |
| MSTRG. 19543. 5 | 2. 13896   | coding    |
| MSTRG. 19543. 6 | 2. 61482   | coding    |
| MSTRG. 19544. 1 | -0. 731489 | noncoding |
| MSTRG. 19547. 1 | -0. 146158 | noncoding |
| MSTRG. 19551. 2 | 0. 729323  | coding    |
| MSTRG. 19555. 1 | 0. 198749  | coding    |
| MSTRG. 19559. 7 | 3. 33449   | coding    |
| MSTRG. 19559. 8 | 3. 25442   | coding    |
| MSTRG. 19559. 5 | 3. 28502   | coding    |
| MSTRG. 19559. 6 | 3. 25846   | coding    |
| MSTRG. 19560. 1 | 0. 838839  | coding    |
| MSTRG. 19561. 1 | 0. 28548   | coding    |
| MSTRG. 19562. 2 | 0. 111805  | coding    |
| MSTRG. 19562. 1 | -1. 60507  | noncoding |
| MSTRG. 19562. 4 | 0. 107787  | coding    |
| MSTRG. 19562. 5 | 0. 160658  | coding    |

|                |           |           |
|----------------|-----------|-----------|
| MSTRG.19562.3  | 0.176215  | coding    |
| MSTRG.19562.6  | 0.159934  | coding    |
| MSTRG.19559.9  | 1.31598   | coding    |
| MSTRG.19563.1  | 0.475238  | coding    |
| MSTRG.19568.1  | 1.77334   | coding    |
| MSTRG.19568.2  | 0.20534   | coding    |
| MSTRG.19568.3  | -0.558309 | noncoding |
| MSTRG.19568.4  | -0.037321 | noncoding |
| MSTRG.19572.9  | 1.69389   | coding    |
| MSTRG.19572.8  | 2.04359   | coding    |
| MSTRG.19572.5  | 3.0856    | coding    |
| MSTRG.19572.7  | 2.56746   | coding    |
| MSTRG.19572.6  | 1.54376   | coding    |
| MSTRG.19573.1  | -0.183066 | noncoding |
| MSTRG.19572.10 | 0.623011  | coding    |
| MSTRG.19572.11 | 0.736851  | coding    |
| MSTRG.19574.1  | -1.75989  | noncoding |
| MSTRG.19572.12 | 0.838393  | coding    |
| MSTRG.19570.2  | 2.60185   | coding    |
| MSTRG.19570.3  | 1.16306   | coding    |
| MSTRG.19570.4  | 1.94985   | coding    |
| MSTRG.19571.2  | 2.39813   | coding    |
| MSTRG.19577.2  | -0.254942 | noncoding |
| MSTRG.19579.1  | 2.7729    | coding    |
| MSTRG.19579.2  | 2.19495   | coding    |
| MSTRG.19582.2  | 1.62145   | coding    |
| MSTRG.19582.4  | 1.5609    | coding    |
| MSTRG.19582.5  | 1.49728   | coding    |
| MSTRG.19582.6  | 1.70227   | coding    |
| MSTRG.19582.3  | 1.5846    | coding    |
| MSTRG.19582.7  | 1.61566   | coding    |
| MSTRG.19581.1  | -1.19939  | noncoding |
| MSTRG.19583.1  | 1.80278   | coding    |
| MSTRG.19590.1  | 0.59054   | coding    |
| MSTRG.19590.2  | -0.061384 | noncoding |
| MSTRG.19591.1  | -1.12342  | noncoding |
| MSTRG.19591.2  | -0.431157 | noncoding |
| MSTRG.19593.1  | -0.572947 | noncoding |
| MSTRG.19596.4  | 2.35316   | coding    |
| MSTRG.19598.3  | 1.85327   | coding    |
| MSTRG.19598.5  | 2.21424   | coding    |
| MSTRG.19598.6  | 1.5719    | coding    |
| MSTRG.19600.1  | -0.16173  | noncoding |
| MSTRG.19602.1  | 1.84709   | coding    |
| MSTRG.19603.1  | -2.58354  | noncoding |
| MSTRG.19602.3  | 1.81321   | coding    |
| MSTRG.19602.4  | 1.91011   | coding    |
| MSTRG.19602.5  | 1.66686   | coding    |
| MSTRG.19602.6  | 1.71841   | coding    |
| MSTRG.19604.6  | 2.16865   | coding    |
| MSTRG.19604.4  | 2.22321   | coding    |
| MSTRG.19604.8  | 1.86976   | coding    |
| MSTRG.19622.1  | 0.505375  | coding    |
| MSTRG.19624.7  | 1.7727    | coding    |

|               |           |           |
|---------------|-----------|-----------|
| MSTRG.19624.9 | 1.74943   | coding    |
| MSTRG.19616.2 | 1.06546   | coding    |
| MSTRG.19614.1 | 1.04126   | coding    |
| MSTRG.19614.2 | 1.04953   | coding    |
| MSTRG.19629.1 | 1.83531   | coding    |
| MSTRG.19628.1 | -2.45989  | noncoding |
| MSTRG.19628.2 | -2.29654  | noncoding |
| MSTRG.19638.4 | 1.85162   | coding    |
| MSTRG.19638.2 | 1.79294   | coding    |
| MSTRG.19638.1 | 1.96489   | coding    |
| MSTRG.19639.1 | -0.004843 | noncoding |
| MSTRG.19640.1 | -0.091258 | noncoding |
| MSTRG.19642.5 | 0.829875  | coding    |
| MSTRG.19642.6 | 0.874918  | coding    |
| MSTRG.19642.7 | 0.703079  | coding    |
| MSTRG.19643.1 | 3.11068   | coding    |
| MSTRG.19648.1 | 1.79373   | coding    |
| MSTRG.19649.3 | 1.1656    | coding    |
| MSTRG.19650.1 | -2.01257  | noncoding |
| MSTRG.19671.9 | 2.20028   | coding    |
| MSTRG.19666.1 | 0.485028  | coding    |
| MSTRG.19672.2 | -0.124346 | noncoding |
| MSTRG.19672.3 | -0.759911 | noncoding |
| MSTRG.19672.4 | -0.873867 | noncoding |
| MSTRG.19674.1 | 1.53871   | coding    |
| MSTRG.19675.1 | 1.32181   | coding    |
| MSTRG.19676.2 | 0.471564  | coding    |
| MSTRG.19678.5 | 2.70458   | coding    |
| MSTRG.19678.8 | 2.30737   | coding    |
| MSTRG.19681.1 | -1.16202  | noncoding |
| MSTRG.19682.1 | -0.357899 | noncoding |
| MSTRG.19683.1 | -0.515643 | noncoding |
| MSTRG.19684.1 | 1.2027    | coding    |
| MSTRG.19684.2 | 1.06072   | coding    |
| MSTRG.19701.1 | -1.24463  | noncoding |
| MSTRG.19707.2 | 1.96687   | coding    |
| MSTRG.19708.1 | -1.51882  | noncoding |
| MSTRG.19707.3 | 0.132706  | coding    |
| MSTRG.19713.2 | 0.801347  | coding    |
| MSTRG.19718.1 | -0.533876 | noncoding |
| MSTRG.19720.3 | 1.15057   | coding    |
| MSTRG.19721.1 | -0.311935 | noncoding |
| MSTRG.19720.4 | -0.195252 | noncoding |
| MSTRG.19720.5 | -0.177153 | noncoding |
| MSTRG.19722.1 | 1.46328   | coding    |
| MSTRG.19723.1 | 1.61343   | coding    |
| MSTRG.19723.4 | 0.165824  | coding    |
| MSTRG.19723.3 | 1.99024   | coding    |
| MSTRG.19723.5 | 1.42651   | coding    |
| MSTRG.19723.6 | 1.12654   | coding    |
| MSTRG.19733.1 | 0.949369  | coding    |
| MSTRG.19743.1 | -1.68978  | noncoding |
| MSTRG.19744.2 | 0.856504  | coding    |
| MSTRG.19744.4 | -1.02732  | noncoding |

|                  |            |           |
|------------------|------------|-----------|
| MSTRG. 19744. 5  | -0. 224353 | noncoding |
| MSTRG. 19744. 6  | -0. 386044 | noncoding |
| MSTRG. 19744. 7  | -1. 90682  | noncoding |
| MSTRG. 19744. 8  | -1. 24338  | noncoding |
| MSTRG. 19744. 9  | -1. 91812  | noncoding |
| MSTRG. 19744. 10 | -1. 81794  | noncoding |
| MSTRG. 19744. 11 | -1. 85115  | noncoding |
| MSTRG. 19744. 12 | -1. 89001  | noncoding |
| MSTRG. 19744. 13 | -1. 58516  | noncoding |
| MSTRG. 19744. 14 | -0. 732223 | noncoding |
| MSTRG. 19744. 15 | -0. 224142 | noncoding |
| MSTRG. 19744. 16 | -2. 04884  | noncoding |
| MSTRG. 19744. 17 | -1. 97171  | noncoding |
| MSTRG. 19744. 18 | -2. 03318  | noncoding |
| MSTRG. 19744. 19 | -2. 01475  | noncoding |
| MSTRG. 19744. 20 | -1. 71819  | noncoding |
| MSTRG. 19744. 21 | -2. 0824   | noncoding |
| MSTRG. 19744. 22 | -2. 06519  | noncoding |
| MSTRG. 19744. 23 | -1. 97883  | noncoding |
| MSTRG. 19744. 24 | -2. 05168  | noncoding |
| MSTRG. 19744. 25 | -2. 13963  | noncoding |
| MSTRG. 19744. 26 | -2. 15822  | noncoding |
| MSTRG. 19744. 27 | -2. 0644   | noncoding |
| MSTRG. 19744. 28 | -1. 95455  | noncoding |
| MSTRG. 19744. 29 | -2. 15345  | noncoding |
| MSTRG. 19744. 30 | -1. 77327  | noncoding |
| MSTRG. 19744. 31 | -2. 07283  | noncoding |
| MSTRG. 19744. 32 | -2. 10595  | noncoding |
| MSTRG. 19739. 1  | -1. 64929  | noncoding |
| MSTRG. 19751. 1  | 0. 43277   | coding    |
| MSTRG. 19752. 1  | -0. 756049 | noncoding |
| MSTRG. 19752. 2  | -0. 570211 | noncoding |
| MSTRG. 19751. 2  | -1. 08316  | noncoding |
| MSTRG. 19751. 3  | -2. 09082  | noncoding |
| MSTRG. 19755. 1  | 1. 24549   | coding    |
| MSTRG. 19755. 2  | 1. 38503   | coding    |
| MSTRG. 19755. 3  | 1. 52878   | coding    |
| MSTRG. 19755. 4  | 1. 53971   | coding    |
| MSTRG. 19755. 5  | 1. 53878   | coding    |
| MSTRG. 19761. 1  | 0. 135957  | coding    |
| MSTRG. 19765. 1  | -2. 48846  | noncoding |
| MSTRG. 19766. 1  | -0. 361055 | noncoding |
| MSTRG. 19767. 3  | 0. 139036  | coding    |
| MSTRG. 19768. 1  | 0. 507675  | coding    |
| MSTRG. 19757. 2  | 1. 85621   | coding    |
| MSTRG. 19774. 1  | 2. 5229    | coding    |
| MSTRG. 19779. 2  | -0. 056953 | noncoding |
| MSTRG. 19784. 2  | 0. 744646  | coding    |
| MSTRG. 19785. 3  | 0. 331671  | coding    |
| MSTRG. 19788. 1  | -0. 031521 | noncoding |
| MSTRG. 19791. 1  | -1. 47193  | noncoding |
| MSTRG. 19803. 2  | 0. 211662  | coding    |
| MSTRG. 19803. 6  | 1. 05068   | coding    |
| MSTRG. 19803. 7  | 0. 87013   | coding    |

|                  |            |           |
|------------------|------------|-----------|
| MSTRG. 19803. 5  | 0. 840495  | coding    |
| MSTRG. 19804. 1  | -1. 65176  | noncoding |
| MSTRG. 19805. 1  | 0. 039321  | coding    |
| MSTRG. 19806. 1  | -2. 10396  | noncoding |
| MSTRG. 19807. 3  | 1. 79402   | coding    |
| MSTRG. 19809. 1  | -2. 30286  | noncoding |
| MSTRG. 19811. 1  | -1. 3135   | noncoding |
| MSTRG. 19821. 1  | -0. 068298 | noncoding |
| MSTRG. 19822. 1  | -1. 93608  | noncoding |
| MSTRG. 19821. 2  | -1. 26267  | noncoding |
| MSTRG. 19821. 3  | -1. 43026  | noncoding |
| MSTRG. 19821. 4  | -1. 4591   | noncoding |
| MSTRG. 19821. 5  | -0. 197127 | noncoding |
| MSTRG. 19821. 7  | -0. 28366  | noncoding |
| MSTRG. 19821. 6  | -1. 0524   | noncoding |
| MSTRG. 19821. 8  | -1. 12721  | noncoding |
| MSTRG. 19821. 9  | -1. 70379  | noncoding |
| MSTRG. 19825. 1  | 1. 14617   | coding    |
| MSTRG. 19827. 1  | -0. 714226 | noncoding |
| MSTRG. 19831. 2  | -0. 184213 | noncoding |
| MSTRG. 19840. 1  | -2. 13565  | noncoding |
| MSTRG. 19841. 1  | 2. 64207   | coding    |
| MSTRG. 19848. 2  | 1. 43113   | coding    |
| MSTRG. 19856. 8  | 1. 36479   | coding    |
| MSTRG. 19856. 9  | 1. 43913   | coding    |
| MSTRG. 19856. 11 | 0. 459296  | coding    |
| MSTRG. 19857. 2  | 1. 99528   | coding    |
| MSTRG. 19861. 2  | -0. 070807 | noncoding |
| MSTRG. 19863. 3  | 1. 28081   | coding    |
| MSTRG. 19863. 2  | 1. 14872   | coding    |
| MSTRG. 19863. 4  | 1. 13739   | coding    |
| MSTRG. 19868. 1  | -0. 569569 | noncoding |
| MSTRG. 19868. 2  | -1. 23395  | noncoding |
| MSTRG. 19879. 1  | -1. 46277  | noncoding |
| MSTRG. 19884. 1  | 0. 534675  | coding    |
| MSTRG. 19884. 2  | -1. 53237  | noncoding |
| MSTRG. 19884. 3  | 0. 080126  | coding    |
| MSTRG. 19884. 4  | -0. 800788 | noncoding |
| MSTRG. 19885. 1  | 0. 151568  | coding    |
| MSTRG. 19888. 1  | -2. 4256   | noncoding |
| MSTRG. 19893. 3  | 0. 896588  | coding    |
| MSTRG. 19906. 4  | 1. 46025   | coding    |
| MSTRG. 19907. 1  | -2. 23995  | noncoding |
| MSTRG. 19908. 2  | 0. 376576  | coding    |
| MSTRG. 19909. 5  | 1. 04201   | coding    |
| MSTRG. 19909. 7  | 1. 06588   | coding    |
| MSTRG. 19909. 6  | 0. 951436  | coding    |
| MSTRG. 19904. 1  | 1. 29614   | coding    |
| MSTRG. 19904. 2  | 1. 41909   | coding    |
| MSTRG. 19904. 3  | 0. 761092  | coding    |
| MSTRG. 19905. 1  | 1. 63059   | coding    |
| MSTRG. 19905. 2  | 1. 25417   | coding    |
| MSTRG. 19917. 1  | 0. 775183  | coding    |
| MSTRG. 19918. 3  | 1. 00375   | coding    |

|                  |            |           |
|------------------|------------|-----------|
| MSTRG. 19912. 3  | 0. 964565  | coding    |
| MSTRG. 19912. 4  | 0. 552325  | coding    |
| MSTRG. 19913. 2  | 0. 687484  | coding    |
| MSTRG. 19914. 2  | 3. 06373   | coding    |
| MSTRG. 19923. 1  | -1. 84133  | noncoding |
| MSTRG. 19924. 1  | -0. 445434 | noncoding |
| MSTRG. 19924. 2  | -0. 459683 | noncoding |
| MSTRG. 19925. 3  | 2. 47295   | coding    |
| MSTRG. 19925. 5  | 1. 58689   | coding    |
| MSTRG. 19926. 5  | 1. 13124   | coding    |
| MSTRG. 19926. 4  | 1. 03872   | coding    |
| MSTRG. 19926. 3  | 1. 61137   | coding    |
| MSTRG. 19930. 1  | -0. 081172 | noncoding |
| MSTRG. 19931. 1  | -2. 31266  | noncoding |
| MSTRG. 19937. 1  | -0. 954125 | noncoding |
| MSTRG. 19938. 1  | -1. 91489  | noncoding |
| MSTRG. 19939. 4  | -1. 6499   | noncoding |
| MSTRG. 19941. 1  | 0. 529886  | coding    |
| MSTRG. 19951. 1  | 0. 785363  | coding    |
| MSTRG. 19954. 2  | 0. 973601  | coding    |
| MSTRG. 19958. 1  | 0. 104497  | coding    |
| MSTRG. 19959. 1  | 1. 37467   | coding    |
| MSTRG. 19959. 3  | 1. 43698   | coding    |
| MSTRG. 19959. 5  | 1. 49691   | coding    |
| MSTRG. 19959. 2  | 1. 43967   | coding    |
| MSTRG. 19959. 8  | 1. 45635   | coding    |
| MSTRG. 19959. 9  | 1. 42069   | coding    |
| MSTRG. 19959. 10 | 1. 47038   | coding    |
| MSTRG. 19959. 11 | 1. 25907   | coding    |
| MSTRG. 19959. 12 | 1. 05051   | coding    |
| MSTRG. 19959. 13 | 1. 45251   | coding    |
| MSTRG. 19942. 1  | 1. 78453   | coding    |
| MSTRG. 19945. 1  | -0. 148309 | noncoding |
| MSTRG. 19947. 1  | -1. 27754  | noncoding |
| MSTRG. 19946. 2  | 0. 984131  | coding    |
| MSTRG. 19967. 1  | -0. 047264 | noncoding |
| MSTRG. 19967. 5  | -0. 021584 | noncoding |
| MSTRG. 19967. 4  | 0. 337007  | coding    |
| MSTRG. 19967. 8  | -1. 41121  | noncoding |
| MSTRG. 19965. 2  | 2. 086     | coding    |
| MSTRG. 19978. 1  | 1. 77931   | coding    |
| MSTRG. 19978. 3  | 1. 79473   | coding    |
| MSTRG. 19978. 2  | 1. 67292   | coding    |
| MSTRG. 19978. 4  | 1. 68371   | coding    |
| MSTRG. 19978. 5  | 1. 88505   | coding    |
| MSTRG. 19979. 1  | -0. 610505 | noncoding |
| MSTRG. 19980. 1  | 2. 20917   | coding    |
| MSTRG. 19983. 1  | 0. 023439  | coding    |
| MSTRG. 19985. 1  | -0. 44644  | noncoding |
| MSTRG. 19981. 1  | -1. 45106  | noncoding |
| MSTRG. 19990. 1  | -0. 802058 | noncoding |
| MSTRG. 19990. 2  | -0. 887339 | noncoding |
| MSTRG. 20000. 1  | 0. 473355  | coding    |
| MSTRG. 20003. 1  | -0. 769839 | noncoding |

|                  |            |           |
|------------------|------------|-----------|
| MSTRG. 20006. 1  | -0. 663805 | noncoding |
| MSTRG. 20008. 1  | -1. 45479  | noncoding |
| MSTRG. 20013. 4  | 2. 95335   | coding    |
| MSTRG. 20013. 5  | -0. 803051 | noncoding |
| MSTRG. 20015. 3  | 1. 43494   | coding    |
| MSTRG. 20015. 5  | 1. 4003    | coding    |
| MSTRG. 20015. 6  | 0. 141063  | coding    |
| MSTRG. 20018. 1  | 0. 283401  | coding    |
| MSTRG. 20018. 2  | -0. 076007 | noncoding |
| MSTRG. 20018. 3  | 0. 937063  | coding    |
| MSTRG. 20027. 1  | 1. 22992   | coding    |
| MSTRG. 20033. 1  | -0. 119911 | noncoding |
| MSTRG. 20037. 1  | -0. 963165 | noncoding |
| MSTRG. 20038. 4  | -1. 4035   | noncoding |
| MSTRG. 20047. 1  | -0. 190442 | noncoding |
| MSTRG. 20056. 1  | 0. 97083   | coding    |
| MSTRG. 20056. 4  | 1. 06606   | coding    |
| MSTRG. 20057. 3  | 1. 46676   | coding    |
| MSTRG. 20057. 4  | 0. 868655  | coding    |
| MSTRG. 20059. 1  | 1. 52683   | coding    |
| MSTRG. 20059. 5  | -1. 3898   | noncoding |
| MSTRG. 20061. 3  | 0. 97854   | coding    |
| MSTRG. 20061. 2  | 1. 84112   | coding    |
| MSTRG. 20063. 1  | -2. 18251  | noncoding |
| MSTRG. 20066. 1  | -0. 483169 | noncoding |
| MSTRG. 20069. 4  | -0. 175968 | noncoding |
| MSTRG. 20074. 2  | 1. 92406   | coding    |
| MSTRG. 20074. 4  | 1. 84975   | coding    |
| MSTRG. 20075. 1  | -0. 170118 | noncoding |
| MSTRG. 20079. 1  | 0. 911283  | coding    |
| MSTRG. 20086. 5  | 2. 08807   | coding    |
| MSTRG. 20086. 6  | 1. 7778    | coding    |
| MSTRG. 20086. 9  | 1. 98076   | coding    |
| MSTRG. 20087. 1  | 1. 31376   | coding    |
| MSTRG. 20086. 10 | 2. 00686   | coding    |
| MSTRG. 20088. 2  | 0. 959072  | coding    |
| MSTRG. 20090. 1  | -1. 54832  | noncoding |
| MSTRG. 20092. 2  | 2. 10701   | coding    |
| MSTRG. 20094. 2  | 0. 631271  | coding    |
| MSTRG. 20097. 2  | 2. 08573   | coding    |
| MSTRG. 20098. 1  | -0. 430754 | noncoding |
| MSTRG. 20107. 1  | -1. 73907  | noncoding |
| MSTRG. 20109. 1  | -0. 803956 | noncoding |
| MSTRG. 20110. 1  | 1. 15914   | coding    |
| MSTRG. 20110. 2  | 1. 57237   | coding    |
| MSTRG. 20110. 3  | 1. 14006   | coding    |
| MSTRG. 20114. 1  | 2. 21358   | coding    |
| MSTRG. 20114. 2  | 0. 40923   | coding    |
| MSTRG. 20114. 4  | 1. 95584   | coding    |
| MSTRG. 20115. 1  | 0. 591784  | coding    |
| MSTRG. 20112. 1  | -2. 25423  | noncoding |
| MSTRG. 20118. 1  | -1. 57754  | noncoding |
| MSTRG. 20117. 3  | 0. 697277  | coding    |
| MSTRG. 20121. 2  | -1. 81097  | noncoding |



|                 |            |           |
|-----------------|------------|-----------|
| MSTRG. 20121. 1 | -0. 291582 | noncoding |
| MSTRG. 20119. 1 | -1. 28355  | noncoding |
| MSTRG. 20120. 1 | 1. 77668   | coding    |
| MSTRG. 20126. 2 | 1. 07326   | coding    |
| MSTRG. 20126. 4 | -0. 245729 | noncoding |
| MSTRG. 20126. 3 | 0. 578363  | coding    |
| MSTRG. 20128. 2 | 0. 049299  | coding    |
| MSTRG. 20132. 3 | 0. 053699  | coding    |
| MSTRG. 20132. 4 | 0. 29881   | coding    |
| MSTRG. 20135. 1 | 1. 97727   | coding    |
| MSTRG. 20148. 1 | 0. 521572  | coding    |
| MSTRG. 20158. 1 | 0. 286458  | coding    |
| MSTRG. 20158. 2 | 0. 106327  | coding    |
| MSTRG. 20158. 5 | 2. 56415   | coding    |
| MSTRG. 20158. 6 | -0. 226137 | noncoding |
| MSTRG. 20162. 4 | 2. 47204   | coding    |
| MSTRG. 20163. 1 | -0. 728448 | noncoding |
| MSTRG. 20164. 1 | -0. 832433 | noncoding |
| MSTRG. 20168. 1 | 0. 432548  | coding    |
| MSTRG. 20154. 2 | 1. 16494   | coding    |
| MSTRG. 20155. 1 | 1. 71457   | coding    |
| MSTRG. 20156. 1 | 0. 554389  | coding    |
| MSTRG. 20157. 1 | 0. 064497  | coding    |
| MSTRG. 20154. 3 | 0. 543299  | coding    |
| MSTRG. 20172. 3 | 0. 365893  | coding    |
| MSTRG. 20173. 1 | -0. 952634 | noncoding |
| MSTRG. 20177. 2 | 1. 15124   | coding    |
| MSTRG. 20179. 1 | -1. 18369  | noncoding |
| MSTRG. 20180. 1 | -1. 58004  | noncoding |
| MSTRG. 20186. 1 | 1. 32498   | coding    |
| MSTRG. 20188. 1 | 0. 212572  | coding    |
| MSTRG. 20189. 2 | -1. 89625  | noncoding |
| MSTRG. 20189. 1 | -2. 36014  | noncoding |
| MSTRG. 20190. 1 | -1. 18539  | noncoding |
| MSTRG. 20193. 2 | -0. 199139 | noncoding |
| MSTRG. 20193. 3 | 0. 144147  | coding    |
| MSTRG. 20198. 2 | 2. 05278   | coding    |
| MSTRG. 20198. 1 | 2. 20385   | coding    |
| MSTRG. 20199. 1 | -0. 747875 | noncoding |
| MSTRG. 20200. 3 | 2. 65048   | coding    |
| MSTRG. 20202. 1 | -0. 817792 | noncoding |
| MSTRG. 20203. 2 | 0. 949233  | coding    |
| MSTRG. 20210. 4 | 1. 37202   | coding    |
| MSTRG. 20210. 3 | 1. 37832   | coding    |
| MSTRG. 20210. 5 | 1. 10464   | coding    |
| MSTRG. 20210. 6 | 0. 677024  | coding    |
| MSTRG. 20212. 1 | 0. 363481  | coding    |
| MSTRG. 20212. 2 | -0. 071361 | noncoding |
| MSTRG. 20212. 3 | -1. 67188  | noncoding |
| MSTRG. 20212. 4 | -0. 086229 | noncoding |
| MSTRG. 20210. 7 | -0. 504587 | noncoding |
| MSTRG. 20207. 2 | 1. 58396   | coding    |
| MSTRG. 20207. 3 | 1. 6389    | coding    |
| MSTRG. 20207. 4 | 1. 64865   | coding    |

|                  |            |           |
|------------------|------------|-----------|
| MSTRG. 20208. 3  | 1. 75792   | coding    |
| MSTRG. 20213. 5  | 0. 076027  | coding    |
| MSTRG. 20213. 6  | -0. 52604  | noncoding |
| MSTRG. 20214. 1  | 0. 250049  | coding    |
| MSTRG. 20215. 1  | -2. 44895  | noncoding |
| MSTRG. 20216. 1  | 0. 621719  | coding    |
| MSTRG. 20218. 4  | 0. 643794  | coding    |
| MSTRG. 20218. 5  | 0. 225549  | coding    |
| MSTRG. 20220. 1  | -0. 580863 | noncoding |
| MSTRG. 20225. 1  | -1. 88473  | noncoding |
| MSTRG. 20225. 2  | -1. 85153  | noncoding |
| MSTRG. 20226. 2  | 0. 759806  | coding    |
| MSTRG. 20226. 3  | 1. 30677   | coding    |
| MSTRG. 20226. 4  | 0. 960477  | coding    |
| MSTRG. 20227. 6  | 2. 18544   | coding    |
| MSTRG. 20227. 5  | 2. 26723   | coding    |
| MSTRG. 20227. 3  | 2. 58065   | coding    |
| MSTRG. 20227. 4  | 2. 57439   | coding    |
| MSTRG. 20227. 8  | 2. 15861   | coding    |
| MSTRG. 20227. 10 | 2. 21051   | coding    |
| MSTRG. 20227. 9  | 2. 15085   | coding    |
| MSTRG. 20227. 11 | 2. 39025   | coding    |
| MSTRG. 20227. 12 | 2. 18489   | coding    |
| MSTRG. 20228. 1  | -1. 28432  | noncoding |
| MSTRG. 20229. 1  | 2. 44845   | coding    |
| MSTRG. 20222. 3  | 1. 23842   | coding    |
| MSTRG. 20222. 4  | 0. 743271  | coding    |
| MSTRG. 20223. 1  | 0. 869955  | coding    |
| MSTRG. 20223. 2  | 0. 611543  | coding    |
| MSTRG. 20241. 1  | 2. 00962   | coding    |
| MSTRG. 20241. 2  | 1. 96143   | coding    |
| MSTRG. 20241. 3  | 1. 96693   | coding    |
| MSTRG. 20241. 5  | 1. 99652   | coding    |
| MSTRG. 20241. 4  | 2. 00993   | coding    |
| MSTRG. 20241. 6  | 2. 2551    | coding    |
| MSTRG. 20231. 1  | -1. 31887  | noncoding |
| MSTRG. 20231. 2  | -1. 32201  | noncoding |
| MSTRG. 20232. 1  | -1. 47494  | noncoding |
| MSTRG. 20233. 1  | 0. 708987  | coding    |
| MSTRG. 20242. 4  | 1. 75769   | coding    |
| MSTRG. 20242. 1  | 2. 59974   | coding    |
| MSTRG. 20242. 2  | 2. 59775   | coding    |
| MSTRG. 20242. 3  | 2. 39325   | coding    |
| MSTRG. 20242. 5  | 1. 6515    | coding    |
| MSTRG. 20242. 8  | 1. 79548   | coding    |
| MSTRG. 20244. 2  | 1. 39798   | coding    |
| MSTRG. 20245. 1  | 0. 551819  | coding    |
| MSTRG. 20246. 1  | 0. 831727  | coding    |
| MSTRG. 20246. 3  | 0. 387342  | coding    |
| MSTRG. 20249. 4  | 1. 40839   | coding    |
| MSTRG. 20250. 2  | 2. 33855   | coding    |
| MSTRG. 20250. 4  | 2. 56047   | coding    |
| MSTRG. 20250. 7  | 2. 25253   | coding    |
| MSTRG. 20250. 8  | 2. 16305   | coding    |

|                  |            |           |
|------------------|------------|-----------|
| MSTRG. 20251. 1  | -1. 83055  | noncoding |
| MSTRG. 20247. 1  | 2. 04126   | coding    |
| MSTRG. 20247. 2  | 2. 22308   | coding    |
| MSTRG. 20248. 1  | -0. 168176 | noncoding |
| MSTRG. 20257. 1  | 2. 04286   | coding    |
| MSTRG. 20257. 2  | -0. 120396 | noncoding |
| MSTRG. 20269. 2  | -0. 235672 | noncoding |
| MSTRG. 20270. 1  | 0. 849802  | coding    |
| MSTRG. 20270. 2  | 0. 899764  | coding    |
| MSTRG. 20270. 3  | 0. 602948  | coding    |
| MSTRG. 20271. 2  | 2. 75378   | coding    |
| MSTRG. 20272. 1  | 0. 77792   | coding    |
| MSTRG. 20274. 1  | -1. 65822  | noncoding |
| MSTRG. 20274. 5  | 1. 97527   | coding    |
| MSTRG. 20274. 4  | 2. 05229   | coding    |
| MSTRG. 20274. 6  | -0. 359788 | noncoding |
| MSTRG. 20277. 1  | -0. 263101 | noncoding |
| MSTRG. 20278. 2  | 1. 29123   | coding    |
| MSTRG. 20279. 1  | 2. 34178   | coding    |
| MSTRG. 20281. 2  | 1. 56615   | coding    |
| MSTRG. 20281. 4  | 1. 70588   | coding    |
| MSTRG. 20287. 3  | 1. 98593   | coding    |
| MSTRG. 20288. 2  | 1. 0393    | coding    |
| MSTRG. 20288. 3  | 0. 618039  | coding    |
| MSTRG. 20290. 1  | 0. 084814  | coding    |
| MSTRG. 20291. 3  | 0. 262235  | coding    |
| MSTRG. 20292. 1  | 1. 87632   | coding    |
| MSTRG. 20292. 2  | 1. 88247   | coding    |
| MSTRG. 20292. 3  | 1. 90759   | coding    |
| MSTRG. 20292. 4  | 2. 51486   | coding    |
| MSTRG. 20292. 7  | 2. 11222   | coding    |
| MSTRG. 20293. 1  | -1. 58618  | noncoding |
| MSTRG. 20298. 3  | 1. 6255    | coding    |
| MSTRG. 20298. 4  | 1. 75887   | coding    |
| MSTRG. 20298. 5  | 1. 54518   | coding    |
| MSTRG. 20298. 6  | 1. 56004   | coding    |
| MSTRG. 20298. 7  | 1. 38373   | coding    |
| MSTRG. 20299. 1  | 0. 361244  | coding    |
| MSTRG. 20315. 2  | 1. 71879   | coding    |
| MSTRG. 20315. 4  | 1. 52069   | coding    |
| MSTRG. 20315. 6  | 1. 85634   | coding    |
| MSTRG. 20315. 5  | 2. 5049    | coding    |
| MSTRG. 20315. 7  | -0. 219076 | noncoding |
| MSTRG. 20315. 11 | 0. 203482  | coding    |
| MSTRG. 20315. 14 | 0. 128792  | coding    |
| MSTRG. 20315. 16 | 0. 689161  | coding    |
| MSTRG. 20318. 1  | -1. 59986  | noncoding |
| MSTRG. 20308. 1  | -1. 78766  | noncoding |
| MSTRG. 20310. 1  | 1. 2837    | coding    |
| MSTRG. 20313. 1  | 0. 881052  | coding    |
| MSTRG. 20313. 2  | 2. 20333   | coding    |
| MSTRG. 20313. 3  | 2. 23536   | coding    |
| MSTRG. 20313. 4  | -0. 940986 | noncoding |
| MSTRG. 20313. 5  | 0. 56453   | coding    |

|                  |            |           |
|------------------|------------|-----------|
| MSTRG. 20334. 1  | 1. 62091   | coding    |
| MSTRG. 20335. 3  | -0. 985499 | noncoding |
| MSTRG. 20338. 1  | -1. 07139  | noncoding |
| MSTRG. 20338. 2  | -1. 54093  | noncoding |
| MSTRG. 20339. 3  | -0. 68145  | noncoding |
| MSTRG. 20339. 4  | -0. 746807 | noncoding |
| MSTRG. 20345. 2  | -0. 468578 | noncoding |
| MSTRG. 20346. 2  | 0. 277722  | coding    |
| MSTRG. 20347. 4  | -0. 198427 | noncoding |
| MSTRG. 20321. 1  | -2. 52508  | noncoding |
| MSTRG. 20328. 4  | -0. 300915 | noncoding |
| MSTRG. 20328. 5  | -0. 546158 | noncoding |
| MSTRG. 20328. 6  | -0. 278185 | noncoding |
| MSTRG. 20330. 1  | -2. 3035   | noncoding |
| MSTRG. 20332. 6  | 0. 008005  | coding    |
| MSTRG. 20354. 1  | -1. 92783  | noncoding |
| MSTRG. 20361. 1  | -2. 32198  | noncoding |
| MSTRG. 20362. 1  | -2. 3274   | noncoding |
| MSTRG. 20362. 2  | -2. 36278  | noncoding |
| MSTRG. 20362. 3  | -2. 3341   | noncoding |
| MSTRG. 20366. 1  | 1. 16765   | coding    |
| MSTRG. 20367. 3  | 1. 09603   | coding    |
| MSTRG. 20367. 4  | 1. 12576   | coding    |
| MSTRG. 20367. 6  | 0. 713675  | coding    |
| MSTRG. 20367. 5  | 0. 868933  | coding    |
| MSTRG. 20376. 4  | 1. 71445   | coding    |
| MSTRG. 20376. 5  | 1. 79329   | coding    |
| MSTRG. 20376. 7  | 1. 83878   | coding    |
| MSTRG. 20376. 8  | 1. 2152    | coding    |
| MSTRG. 20376. 6  | -0. 397267 | noncoding |
| MSTRG. 20376. 9  | 0. 068796  | coding    |
| MSTRG. 20376. 10 | -0. 423094 | noncoding |
| MSTRG. 20378. 2  | 1. 7544    | coding    |
| MSTRG. 20382. 3  | 2. 6244    | coding    |
| MSTRG. 20382. 5  | 2. 59423   | coding    |
| MSTRG. 20382. 8  | 2. 54887   | coding    |
| MSTRG. 20387. 2  | 2. 21835   | coding    |
| MSTRG. 20387. 8  | -1. 44353  | noncoding |
| MSTRG. 20387. 7  | 2. 45917   | coding    |
| MSTRG. 20388. 1  | -0. 045402 | noncoding |
| MSTRG. 20393. 1  | 0. 148956  | coding    |
| MSTRG. 20394. 1  | 1. 67612   | coding    |
| MSTRG. 20395. 1  | 1. 42449   | coding    |
| MSTRG. 20395. 2  | 1. 44224   | coding    |
| MSTRG. 20395. 3  | 1. 33496   | coding    |
| MSTRG. 20395. 4  | 1. 19957   | coding    |
| MSTRG. 20395. 14 | 1. 77043   | coding    |
| MSTRG. 20395. 10 | 2. 13526   | coding    |
| MSTRG. 20395. 11 | 2. 18073   | coding    |
| MSTRG. 20395. 7  | 2. 07698   | coding    |
| MSTRG. 20395. 8  | 2. 06655   | coding    |
| MSTRG. 20395. 12 | 1. 77959   | coding    |
| MSTRG. 20395. 13 | 2. 17532   | coding    |
| MSTRG. 20395. 9  | 2. 43162   | coding    |

|                 |            |           |
|-----------------|------------|-----------|
| MSTRG. 20396. 1 | -1. 74602  | noncoding |
| MSTRG. 20397. 1 | 1. 30105   | coding    |
| MSTRG. 20396. 2 | -0. 24414  | noncoding |
| MSTRG. 20396. 3 | -0. 427992 | noncoding |
| MSTRG. 20396. 4 | -0. 731569 | noncoding |
| MSTRG. 20390. 2 | 2. 11858   | coding    |
| MSTRG. 20392. 1 | 2. 78646   | coding    |
| MSTRG. 20400. 7 | 0. 330995  | coding    |
| MSTRG. 20401. 1 | -0. 417739 | noncoding |
| MSTRG. 20402. 1 | -0. 300367 | noncoding |
| MSTRG. 20403. 1 | -0. 916928 | noncoding |
| MSTRG. 20407. 1 | 0. 303092  | coding    |
| MSTRG. 20414. 2 | 2. 22785   | coding    |
| MSTRG. 20415. 1 | -0. 053048 | noncoding |
| MSTRG. 20416. 1 | 1. 43147   | coding    |
| MSTRG. 20421. 1 | 0. 444605  | coding    |
| MSTRG. 20421. 2 | 0. 454082  | coding    |
| MSTRG. 20421. 3 | 1. 27199   | coding    |
| MSTRG. 20424. 1 | -1. 33081  | noncoding |
| MSTRG. 20426. 1 | 1. 40035   | coding    |
| MSTRG. 20426. 2 | 1. 42256   | coding    |
| MSTRG. 20429. 2 | 0. 212585  | coding    |
| MSTRG. 20430. 1 | -2. 33707  | noncoding |
| MSTRG. 20433. 4 | 2. 61956   | coding    |
| MSTRG. 20434. 1 | 0. 575661  | coding    |
| MSTRG. 20433. 7 | 0. 578064  | coding    |
| MSTRG. 20431. 2 | 1. 85966   | coding    |
| MSTRG. 20431. 3 | 0. 668076  | coding    |
| MSTRG. 20431. 4 | 0. 567322  | coding    |
| MSTRG. 20438. 4 | 1. 15728   | coding    |
| MSTRG. 20439. 1 | 0. 672369  | coding    |
| MSTRG. 20439. 2 | -0. 061024 | noncoding |
| MSTRG. 20439. 3 | 0. 85155   | coding    |
| MSTRG. 20440. 1 | 0. 555371  | coding    |
| MSTRG. 20440. 2 | 0. 336079  | coding    |
| MSTRG. 20446. 2 | -0. 864877 | noncoding |
| MSTRG. 20451. 2 | 0. 424715  | coding    |
| MSTRG. 20452. 1 | -1. 66842  | noncoding |
| MSTRG. 20453. 1 | 0. 299085  | coding    |
| MSTRG. 20455. 2 | -0. 130151 | noncoding |
| MSTRG. 20457. 2 | 1. 42286   | coding    |
| MSTRG. 20457. 4 | 1. 31348   | coding    |
| MSTRG. 20457. 7 | 1. 43454   | coding    |
| MSTRG. 20457. 6 | 1. 42342   | coding    |
| MSTRG. 20457. 8 | 0. 795219  | coding    |
| MSTRG. 20469. 1 | 0. 964337  | coding    |
| MSTRG. 20469. 2 | 1. 02811   | coding    |
| MSTRG. 20471. 1 | -0. 660098 | noncoding |
| MSTRG. 20471. 2 | -1. 1331   | noncoding |
| MSTRG. 20473. 2 | -1. 80534  | noncoding |
| MSTRG. 20474. 1 | -1. 70182  | noncoding |
| MSTRG. 20476. 1 | -0. 706854 | noncoding |
| MSTRG. 20482. 6 | -0. 284034 | noncoding |
| MSTRG. 20483. 1 | 0. 285985  | coding    |

|                 |            |           |
|-----------------|------------|-----------|
| MSTRG. 20484. 1 | -0. 547627 | noncoding |
| MSTRG. 20486. 1 | -0. 944725 | noncoding |
| MSTRG. 20479. 1 | -1. 98257  | noncoding |
| MSTRG. 20489. 1 | -0. 181336 | noncoding |
| MSTRG. 20504. 2 | -1. 03611  | noncoding |
| MSTRG. 20505. 1 | 1. 74006   | coding    |
| MSTRG. 20506. 1 | 0. 091389  | coding    |
| MSTRG. 20512. 1 | -1. 05188  | noncoding |
| MSTRG. 20512. 2 | -1. 0311   | noncoding |
| MSTRG. 20512. 3 | -0. 195869 | noncoding |
| MSTRG. 20512. 4 | -0. 752889 | noncoding |
| MSTRG. 20512. 5 | -0. 457547 | noncoding |
| MSTRG. 20512. 6 | -1. 64063  | noncoding |
| MSTRG. 20514. 1 | -2. 44618  | noncoding |
| MSTRG. 20516. 1 | -2. 3992   | noncoding |
| MSTRG. 20526. 1 | -0. 458735 | noncoding |
| MSTRG. 20528. 1 | -0. 0468   | noncoding |
| MSTRG. 20547. 1 | -1. 22084  | noncoding |
| MSTRG. 20552. 1 | -0. 11905  | noncoding |
| MSTRG. 20565. 1 | -1. 39897  | noncoding |
| MSTRG. 20566. 1 | -0. 455025 | noncoding |
| MSTRG. 20568. 2 | 1. 07645   | coding    |
| MSTRG. 20569. 1 | -1. 81763  | noncoding |
| MSTRG. 20570. 1 | -0. 879627 | noncoding |
| MSTRG. 20571. 1 | 0. 843785  | coding    |
| MSTRG. 20574. 1 | -0. 720205 | noncoding |
| MSTRG. 20577. 2 | 1. 6731    | coding    |
| MSTRG. 20577. 3 | 0. 702046  | coding    |
| MSTRG. 20579. 2 | 1. 0831    | coding    |
| MSTRG. 20579. 4 | 1. 56145   | coding    |
| MSTRG. 20580. 1 | -1. 21981  | noncoding |
| MSTRG. 20581. 1 | -0. 423339 | noncoding |
| MSTRG. 20583. 1 | 1. 76908   | coding    |
| MSTRG. 20584. 1 | -0. 693598 | noncoding |
| MSTRG. 20593. 2 | 1. 95434   | coding    |
| MSTRG. 20593. 3 | 2. 78179   | coding    |
| MSTRG. 20608. 7 | 1. 35064   | coding    |
| MSTRG. 20608. 6 | 2. 54256   | coding    |
| MSTRG. 20609. 1 | -0. 362854 | noncoding |
| MSTRG. 20610. 1 | -0. 214197 | noncoding |
| MSTRG. 20608. 8 | 2. 12368   | coding    |
| MSTRG. 20611. 1 | -0. 435053 | noncoding |
| MSTRG. 20612. 1 | -0. 032814 | noncoding |
| MSTRG. 20608. 9 | 1. 29556   | coding    |
| MSTRG. 20603. 1 | -0. 503358 | noncoding |
| MSTRG. 20603. 2 | -0. 638084 | noncoding |
| MSTRG. 20603. 3 | 0. 543737  | coding    |
| MSTRG. 20613. 1 | 1. 28923   | coding    |
| MSTRG. 20613. 2 | 1. 96443   | coding    |
| MSTRG. 20614. 1 | -2. 57361  | noncoding |
| MSTRG. 20616. 1 | -2. 09356  | noncoding |
| MSTRG. 20618. 2 | 1. 35458   | coding    |
| MSTRG. 20620. 2 | -2. 2846   | noncoding |
| MSTRG. 20619. 4 | 1. 80979   | coding    |

|                  |            |           |
|------------------|------------|-----------|
| MSTRG. 20621. 1  | 0. 038989  | coding    |
| MSTRG. 20628. 2  | 2. 19254   | coding    |
| MSTRG. 20629. 1  | -1. 75158  | noncoding |
| MSTRG. 20629. 2  | -2. 15185  | noncoding |
| MSTRG. 20631. 2  | 1. 52509   | coding    |
| MSTRG. 20631. 3  | 1. 04794   | coding    |
| MSTRG. 20634. 1  | 1. 85143   | coding    |
| MSTRG. 20634. 2  | 1. 89732   | coding    |
| MSTRG. 20634. 3  | 0. 859848  | coding    |
| MSTRG. 20637. 3  | 1. 26567   | coding    |
| MSTRG. 20637. 5  | 0. 893671  | coding    |
| MSTRG. 20637. 4  | 0. 853287  | coding    |
| MSTRG. 20638. 1  | 0. 045956  | coding    |
| MSTRG. 20642. 1  | 0. 288805  | coding    |
| MSTRG. 20654. 1  | -1. 70873  | noncoding |
| MSTRG. 20654. 2  | 2. 77421   | coding    |
| MSTRG. 20654. 4  | 0. 423614  | coding    |
| MSTRG. 20654. 3  | 2. 0709    | coding    |
| MSTRG. 20654. 5  | 1. 26932   | coding    |
| MSTRG. 20654. 12 | 0. 680198  | coding    |
| MSTRG. 20654. 8  | 1. 99704   | coding    |
| MSTRG. 20654. 10 | 1. 86253   | coding    |
| MSTRG. 20654. 11 | 2. 8762    | coding    |
| MSTRG. 20654. 9  | 2. 83007   | coding    |
| MSTRG. 20654. 6  | 2. 70737   | coding    |
| MSTRG. 20654. 7  | 2. 70117   | coding    |
| MSTRG. 20654. 13 | 0. 685104  | coding    |
| MSTRG. 20656. 1  | 0. 139227  | coding    |
| MSTRG. 20657. 1  | -0. 905593 | noncoding |
| MSTRG. 20658. 1  | -0. 912476 | noncoding |
| MSTRG. 20654. 14 | -0. 103041 | noncoding |
| MSTRG. 20660. 2  | 2. 89624   | coding    |
| MSTRG. 20644. 1  | 0. 870646  | coding    |
| MSTRG. 20644. 3  | 1. 16408   | coding    |
| MSTRG. 20644. 6  | 0. 514918  | coding    |
| MSTRG. 20646. 1  | 1. 70074   | coding    |
| MSTRG. 20649. 2  | 2. 49076   | coding    |
| MSTRG. 20649. 3  | 2. 87985   | coding    |
| MSTRG. 20662. 1  | -2. 67085  | noncoding |
| MSTRG. 20662. 2  | -1. 33204  | noncoding |
| MSTRG. 20662. 3  | 1. 24178   | coding    |
| MSTRG. 20662. 4  | 1. 25731   | coding    |
| MSTRG. 20662. 5  | 1. 26002   | coding    |
| MSTRG. 20662. 6  | 1. 09213   | coding    |
| MSTRG. 20664. 1  | 2. 9983    | coding    |
| MSTRG. 20664. 2  | 1. 67551   | coding    |
| MSTRG. 20667. 2  | -0. 531523 | noncoding |
| MSTRG. 20668. 1  | -0. 713866 | noncoding |
| MSTRG. 20669. 2  | 0. 57202   | coding    |
| MSTRG. 20670. 1  | 0. 092601  | coding    |
| MSTRG. 20672. 6  | 2. 36202   | coding    |
| MSTRG. 20672. 8  | 1. 73048   | coding    |
| MSTRG. 20674. 1  | 1. 77348   | coding    |
| MSTRG. 20674. 3  | 1. 78187   | coding    |

|                  |            |           |
|------------------|------------|-----------|
| MSTRG. 20674. 5  | 2. 48793   | coding    |
| MSTRG. 20674. 6  | -0. 191704 | noncoding |
| MSTRG. 20678. 2  | 1. 87372   | coding    |
| MSTRG. 20678. 3  | -0. 601489 | noncoding |
| MSTRG. 20678. 4  | 2. 01934   | coding    |
| MSTRG. 20679. 1  | -0. 332905 | noncoding |
| MSTRG. 20677. 1  | -0. 1477   | noncoding |
| MSTRG. 20681. 1  | -0. 707592 | noncoding |
| MSTRG. 20682. 1  | -3. 29254  | noncoding |
| MSTRG. 20682. 2  | -3. 07498  | noncoding |
| MSTRG. 20688. 2  | 0. 749366  | coding    |
| MSTRG. 20705. 1  | 0. 476065  | coding    |
| MSTRG. 20705. 2  | 0. 489369  | coding    |
| MSTRG. 20710. 3  | 1. 74808   | coding    |
| MSTRG. 20710. 5  | 0. 740807  | coding    |
| MSTRG. 20711. 1  | -1. 79672  | noncoding |
| MSTRG. 20713. 1  | -0. 902892 | noncoding |
| MSTRG. 20708. 2  | 1. 81306   | coding    |
| MSTRG. 20709. 1  | -0. 259048 | noncoding |
| MSTRG. 20714. 1  | 2. 08673   | coding    |
| MSTRG. 20725. 3  | 1. 63286   | coding    |
| MSTRG. 20725. 5  | -0. 336645 | noncoding |
| MSTRG. 20725. 4  | 1. 67749   | coding    |
| MSTRG. 20725. 6  | 1. 62923   | coding    |
| MSTRG. 20725. 7  | -2. 11018  | noncoding |
| MSTRG. 20725. 8  | 1. 6718    | coding    |
| MSTRG. 20725. 9  | 0. 076605  | coding    |
| MSTRG. 20725. 10 | 1. 02856   | coding    |
| MSTRG. 20725. 11 | 1. 48857   | coding    |
| MSTRG. 20725. 12 | 0. 838624  | coding    |
| MSTRG. 20725. 14 | -0. 126251 | noncoding |
| MSTRG. 20726. 1  | -0. 097575 | noncoding |
| MSTRG. 20727. 1  | 0. 34521   | coding    |
| MSTRG. 20728. 1  | 0. 832278  | coding    |
| MSTRG. 20730. 12 | -1. 79733  | noncoding |
| MSTRG. 20730. 6  | 1. 6838    | coding    |
| MSTRG. 20730. 8  | 1. 68983   | coding    |
| MSTRG. 20730. 11 | 2. 21269   | coding    |
| MSTRG. 20730. 10 | 1. 99141   | coding    |
| MSTRG. 20730. 7  | 1. 98204   | coding    |
| MSTRG. 20730. 4  | 2. 03321   | coding    |
| MSTRG. 20730. 5  | 2. 03368   | coding    |
| MSTRG. 20730. 9  | 2. 18044   | coding    |
| MSTRG. 20730. 13 | 1. 83534   | coding    |
| MSTRG. 20730. 14 | 1. 81155   | coding    |
| MSTRG. 20718. 1  | -1. 26923  | noncoding |
| MSTRG. 20720. 2  | -1. 7129   | noncoding |
| MSTRG. 20734. 1  | -0. 102856 | noncoding |
| MSTRG. 20740. 1  | 2. 0079    | coding    |
| MSTRG. 20742. 2  | 1. 53611   | coding    |
| MSTRG. 20742. 3  | 0. 877428  | coding    |
| MSTRG. 20742. 4  | -0. 04523  | noncoding |
| MSTRG. 20743. 1  | 0. 592938  | coding    |
| MSTRG. 20746. 1  | -1. 20787  | noncoding |



|                  |            |           |
|------------------|------------|-----------|
| MSTRG. 20737. 1  | 0. 285002  | coding    |
| MSTRG. 20737. 2  | 0. 653055  | coding    |
| MSTRG. 20751. 2  | 0. 510809  | coding    |
| MSTRG. 20753. 3  | 1. 30931   | coding    |
| MSTRG. 20753. 4  | 0. 749815  | coding    |
| MSTRG. 20750. 3  | 1. 75598   | coding    |
| MSTRG. 20750. 1  | 2. 05508   | coding    |
| MSTRG. 20758. 1  | -0. 130004 | noncoding |
| MSTRG. 20763. 10 | -1. 74177  | noncoding |
| MSTRG. 20763. 8  | 1. 53485   | coding    |
| MSTRG. 20763. 13 | 1. 56746   | coding    |
| MSTRG. 20774. 1  | 0. 600735  | coding    |
| MSTRG. 20775. 4  | 0. 942834  | coding    |
| MSTRG. 20775. 6  | 0. 881413  | coding    |
| MSTRG. 20775. 7  | 0. 892438  | coding    |
| MSTRG. 20775. 8  | 1. 2257    | coding    |
| MSTRG. 20775. 9  | -1. 29196  | noncoding |
| MSTRG. 20776. 1  | 0. 380034  | coding    |
| MSTRG. 20776. 2  | 0. 401556  | coding    |
| MSTRG. 20777. 1  | -0. 498579 | noncoding |
| MSTRG. 20778. 1  | 0. 659483  | coding    |
| MSTRG. 20780. 1  | -1. 3913   | noncoding |
| MSTRG. 20781. 1  | -0. 895753 | noncoding |
| MSTRG. 20782. 1  | 0. 29138   | coding    |
| MSTRG. 20783. 1  | 1. 01294   | coding    |
| MSTRG. 20781. 2  | -0. 376764 | noncoding |
| MSTRG. 20784. 1  | 0. 56594   | coding    |
| MSTRG. 20785. 1  | 1. 0222    | coding    |
| MSTRG. 20786. 1  | -0. 451579 | noncoding |
| MSTRG. 20775. 10 | 0. 600861  | coding    |
| MSTRG. 20787. 1  | 0. 674961  | coding    |
| MSTRG. 20787. 2  | 0. 403051  | coding    |
| MSTRG. 20792. 1  | 0. 700618  | coding    |
| MSTRG. 20793. 1  | -0. 096643 | noncoding |
| MSTRG. 20794. 1  | 0. 463775  | coding    |
| MSTRG. 20800. 1  | 0. 166813  | coding    |
| MSTRG. 20800. 2  | -0. 471268 | noncoding |
| MSTRG. 20801. 1  | -1. 76084  | noncoding |
| MSTRG. 20797. 1  | -1. 79865  | noncoding |
| MSTRG. 20798. 4  | 1. 58622   | coding    |
| MSTRG. 20819. 4  | 2. 14755   | coding    |
| MSTRG. 20819. 8  | 2. 39292   | coding    |
| MSTRG. 20822. 1  | -2. 29082  | noncoding |
| MSTRG. 20816. 5  | 1. 17534   | coding    |
| MSTRG. 20816. 3  | 1. 42346   | coding    |
| MSTRG. 20816. 4  | 1. 20973   | coding    |
| MSTRG. 20816. 2  | 1. 31223   | coding    |
| MSTRG. 20823. 3  | 1. 25037   | coding    |
| MSTRG. 20823. 4  | 2. 13479   | coding    |
| MSTRG. 20823. 2  | 2. 42751   | coding    |
| MSTRG. 20823. 1  | 3. 01382   | coding    |
| MSTRG. 20817. 2  | 1. 56347   | coding    |
| MSTRG. 20817. 1  | 1. 92659   | coding    |
| MSTRG. 20828. 4  | 2. 5175    | coding    |

|               |           |           |
|---------------|-----------|-----------|
| MSTRG.20828.5 | -0.062872 | noncoding |
| MSTRG.20829.1 | 2.12637   | coding    |
| MSTRG.20829.2 | 2.30827   | coding    |
| MSTRG.20829.5 | 2.30857   | coding    |
| MSTRG.20830.4 | 0.515854  | coding    |
| MSTRG.20825.3 | 0.806113  | coding    |
| MSTRG.20825.4 | 0.808754  | coding    |
| MSTRG.20826.2 | -0.478119 | noncoding |
| MSTRG.20831.1 | 0.98618   | coding    |
| MSTRG.20832.3 | 1.42052   | coding    |
| MSTRG.20836.2 | 2.95711   | coding    |
| MSTRG.20836.3 | 2.94566   | coding    |
| MSTRG.20836.4 | 2.92279   | coding    |
| MSTRG.20840.1 | 0.540638  | coding    |
| MSTRG.20845.4 | 1.76835   | coding    |
| MSTRG.20845.7 | 1.64896   | coding    |
| MSTRG.20845.6 | 1.82949   | coding    |
| MSTRG.20845.9 | 0.325201  | coding    |
| MSTRG.20844.2 | 0.461599  | coding    |
| MSTRG.20850.1 | 0.970349  | coding    |
| MSTRG.20850.3 | 0.298246  | coding    |
| MSTRG.20852.4 | 1.83113   | coding    |
| MSTRG.20854.1 | -0.148172 | noncoding |
| MSTRG.20854.2 | -0.064081 | noncoding |
| MSTRG.20866.1 | -1.66887  | noncoding |
| MSTRG.20867.2 | 1.55859   | coding    |
| MSTRG.20873.1 | 2.77917   | coding    |
| MSTRG.20873.2 | 2.75108   | coding    |
| MSTRG.20873.3 | 2.89085   | coding    |
| MSTRG.20873.4 | 2.98405   | coding    |
| MSTRG.20875.3 | -0.108463 | noncoding |
| MSTRG.20875.2 | 1.89962   | coding    |
| MSTRG.20876.1 | 0.104074  | coding    |
| MSTRG.20877.1 | -0.726915 | noncoding |
| MSTRG.20878.1 | 0.430526  | coding    |
| MSTRG.20872.1 | -0.746709 | noncoding |
| MSTRG.20882.1 | 1.02079   | coding    |
| MSTRG.20883.1 | -1.50817  | noncoding |
| MSTRG.20884.2 | 0.913014  | coding    |
| MSTRG.20884.3 | 1.29699   | coding    |
| MSTRG.20884.4 | 0.763538  | coding    |
| MSTRG.20891.1 | 0.517876  | coding    |
| MSTRG.20891.2 | 0.91039   | coding    |
| MSTRG.20891.3 | 0.660414  | coding    |
| MSTRG.20892.1 | 0.251922  | coding    |
| MSTRG.20895.1 | 1.00497   | coding    |
| MSTRG.20900.4 | 0.056241  | coding    |
| MSTRG.20900.3 | 0.428821  | coding    |
| MSTRG.20912.2 | 0.15446   | coding    |
| MSTRG.20913.3 | 2.75288   | coding    |
| MSTRG.20913.4 | 3.19547   | coding    |
| MSTRG.20913.5 | 2.66088   | coding    |
| MSTRG.20915.1 | -2.23815  | noncoding |
| MSTRG.20919.1 | 1.71711   | coding    |

|                  |            |           |
|------------------|------------|-----------|
| MSTRG. 20914. 1  | -0. 707784 | noncoding |
| MSTRG. 20914. 2  | -1. 96758  | noncoding |
| MSTRG. 20914. 3  | -1. 95138  | noncoding |
| MSTRG. 20923. 1  | -1. 53536  | noncoding |
| MSTRG. 20921. 1  | -1. 91229  | noncoding |
| MSTRG. 20921. 2  | -0. 879902 | noncoding |
| MSTRG. 20932. 2  | -0. 010009 | noncoding |
| MSTRG. 20934. 1  | -1. 74497  | noncoding |
| MSTRG. 20930. 1  | 1. 55538   | coding    |
| MSTRG. 20943. 1  | -1. 52663  | noncoding |
| MSTRG. 20944. 1  | -0. 550766 | noncoding |
| MSTRG. 20940. 1  | -1. 11724  | noncoding |
| MSTRG. 20949. 2  | 2. 57717   | coding    |
| MSTRG. 20951. 1  | 1. 03721   | coding    |
| MSTRG. 20952. 2  | 0. 621723  | coding    |
| MSTRG. 20953. 4  | 0. 627231  | coding    |
| MSTRG. 20953. 2  | -0. 247267 | noncoding |
| MSTRG. 20953. 5  | -0. 079213 | noncoding |
| MSTRG. 20950. 2  | 2. 48511   | coding    |
| MSTRG. 20955. 3  | 1. 4935    | coding    |
| MSTRG. 20955. 5  | 2. 20634   | coding    |
| MSTRG. 20955. 4  | 1. 98085   | coding    |
| MSTRG. 20955. 1  | 1. 81945   | coding    |
| MSTRG. 20957. 1  | -0. 579914 | noncoding |
| MSTRG. 20959. 1  | -2. 3074   | noncoding |
| MSTRG. 20967. 3  | 1. 29392   | coding    |
| MSTRG. 20967. 7  | 1. 44881   | coding    |
| MSTRG. 20967. 9  | 1. 52074   | coding    |
| MSTRG. 20967. 10 | 1. 50571   | coding    |
| MSTRG. 20967. 8  | 1. 66402   | coding    |
| MSTRG. 20967. 11 | 1. 72268   | coding    |
| MSTRG. 20967. 13 | 1. 22159   | coding    |
| MSTRG. 20967. 14 | 1. 33186   | coding    |
| MSTRG. 20969. 2  | -0. 955412 | noncoding |
| MSTRG. 20963. 4  | 2. 02001   | coding    |
| MSTRG. 20963. 5  | 1. 99516   | coding    |
| MSTRG. 20963. 8  | 2. 38973   | coding    |
| MSTRG. 20963. 6  | 1. 95589   | coding    |
| MSTRG. 20975. 2  | 0. 218494  | coding    |
| MSTRG. 20979. 2  | 2. 42712   | coding    |
| MSTRG. 20981. 2  | 1. 76016   | coding    |
| MSTRG. 20977. 2  | 1. 35256   | coding    |
| MSTRG. 20978. 1  | 1. 48547   | coding    |
| MSTRG. 20978. 3  | 0. 598176  | coding    |
| MSTRG. 20986. 2  | 1. 57457   | coding    |
| MSTRG. 20986. 5  | 1. 86708   | coding    |
| MSTRG. 20986. 1  | 1. 61746   | coding    |
| MSTRG. 20986. 3  | 1. 57279   | coding    |
| MSTRG. 20986. 7  | 1. 48421   | coding    |
| MSTRG. 20986. 8  | 1. 26771   | coding    |
| MSTRG. 20989. 1  | 0. 733008  | coding    |
| MSTRG. 20990. 1  | -0. 215287 | noncoding |
| MSTRG. 20990. 2  | 0. 011018  | coding    |
| MSTRG. 20994. 3  | 1. 40898   | coding    |

|                |           |           |
|----------------|-----------|-----------|
| MSTRG. 20999.2 | 1.59851   | coding    |
| MSTRG. 20999.3 | 1.60999   | coding    |
| MSTRG. 21000.1 | -1.27989  | noncoding |
| MSTRG. 21002.1 | 0.268717  | coding    |
| MSTRG. 21011.4 | 2.36615   | coding    |
| MSTRG. 21017.1 | -2.03331  | noncoding |
| MSTRG. 21018.1 | 1.4404    | coding    |
| MSTRG. 21018.2 | 1.42606   | coding    |
| MSTRG. 21018.3 | 1.47457   | coding    |
| MSTRG. 21024.5 | 1.64757   | coding    |
| MSTRG. 21024.6 | 1.30746   | coding    |
| MSTRG. 21024.7 | 1.36418   | coding    |
| MSTRG. 21022.1 | -1.06481  | noncoding |
| MSTRG. 21027.4 | 0.328179  | coding    |
| MSTRG. 21027.6 | 0.280517  | coding    |
| MSTRG. 21027.5 | 0.093277  | coding    |
| MSTRG. 21027.8 | 0.211901  | coding    |
| MSTRG. 21037.2 | 1.49155   | coding    |
| MSTRG. 21038.2 | 1.05321   | coding    |
| MSTRG. 21038.5 | -1.39393  | noncoding |
| MSTRG. 21038.6 | -0.49455  | noncoding |
| MSTRG. 21039.2 | 0.495244  | coding    |
| MSTRG. 21048.3 | 1.40964   | coding    |
| MSTRG. 21048.5 | 1.81545   | coding    |
| MSTRG. 21049.2 | 0.523841  | coding    |
| MSTRG. 21061.1 | 1.93374   | coding    |
| MSTRG. 21061.2 | 1.54741   | coding    |
| MSTRG. 21062.1 | 0.420115  | coding    |
| MSTRG. 21061.3 | 0.859273  | coding    |
| MSTRG. 21066.1 | -0.034895 | noncoding |
| MSTRG. 21068.3 | 3.02856   | coding    |
| MSTRG. 21074.1 | 0.559541  | coding    |
| MSTRG. 21076.4 | -0.714671 | noncoding |
| MSTRG. 21079.1 | -0.869277 | noncoding |
| MSTRG. 21080.3 | 1.62909   | coding    |
| MSTRG. 21080.4 | -0.355546 | noncoding |
| MSTRG. 21082.1 | -1.11013  | noncoding |
| MSTRG. 21083.1 | 0.398534  | coding    |
| MSTRG. 21086.1 | -0.943911 | noncoding |
| MSTRG. 21087.3 | 0.404575  | coding    |
| MSTRG. 21090.1 | 0.721973  | coding    |
| MSTRG. 21089.3 | 0.300838  | coding    |
| MSTRG. 21096.4 | 0.652417  | coding    |
| MSTRG. 21092.2 | -0.009653 | noncoding |
| MSTRG. 21093.3 | 2.46238   | coding    |
| MSTRG. 21104.3 | 0.474193  | coding    |
| MSTRG. 21104.4 | 0.257231  | coding    |
| MSTRG. 21105.1 | -0.126079 | noncoding |
| MSTRG. 21106.5 | 1.38515   | coding    |
| MSTRG. 21106.7 | 2.26848   | coding    |
| MSTRG. 21106.6 | 2.40977   | coding    |
| MSTRG. 21106.2 | 1.46463   | coding    |
| MSTRG. 21106.4 | 1.46781   | coding    |
| MSTRG. 21106.8 | 1.26173   | coding    |

|                 |           |           |
|-----------------|-----------|-----------|
| MSTRG. 21106.9  | 1.49817   | coding    |
| MSTRG. 21106.10 | 1.0701    | coding    |
| MSTRG. 21106.11 | 0.95702   | coding    |
| MSTRG. 21101.3  | 1.72753   | coding    |
| MSTRG. 21098.1  | -0.23716  | noncoding |
| MSTRG. 21102.2  | 0.399461  | coding    |
| MSTRG. 21107.2  | 1.93625   | coding    |
| MSTRG. 21107.3  | 2.19192   | coding    |
| MSTRG. 21108.1  | 0.488184  | coding    |
| MSTRG. 21109.1  | -0.710593 | noncoding |
| MSTRG. 21107.4  | 1.22949   | coding    |
| MSTRG. 21111.2  | 1.49867   | coding    |
| MSTRG. 21112.1  | 0.839836  | coding    |
| MSTRG. 21112.2  | 0.704187  | coding    |
| MSTRG. 21115.1  | -1.08364  | noncoding |
| MSTRG. 21117.1  | -2.32607  | noncoding |
| MSTRG. 21120.1  | -1.27403  | noncoding |
| MSTRG. 21126.2  | 1.00078   | coding    |
| MSTRG. 21123.1  | -0.906682 | noncoding |
| MSTRG. 21130.3  | 0.527631  | coding    |
| MSTRG. 21127.1  | 1.99873   | coding    |
| MSTRG. 21127.2  | 2.0011    | coding    |
| MSTRG. 21128.1  | -2.8145   | noncoding |
| MSTRG. 21146.3  | 0.744753  | coding    |
| MSTRG. 21147.1  | -0.466247 | noncoding |
| MSTRG. 21146.4  | 0.688481  | coding    |
| MSTRG. 21146.6  | 0.73358   | coding    |
| MSTRG. 21146.5  | 0.808356  | coding    |
| MSTRG. 21146.7  | 1.44423   | coding    |
| MSTRG. 21146.8  | 0.552985  | coding    |
| MSTRG. 21146.9  | -0.301489 | noncoding |
| MSTRG. 21146.10 | 0.472693  | coding    |
| MSTRG. 21146.11 | 0.264211  | coding    |
| MSTRG. 21146.12 | -0.017959 | noncoding |
| MSTRG. 21148.10 | 1.1153    | coding    |
| MSTRG. 21148.12 | 1.14166   | coding    |
| MSTRG. 21148.6  | 1.2688    | coding    |
| MSTRG. 21148.8  | 1.11058   | coding    |
| MSTRG. 21148.9  | 1.37711   | coding    |
| MSTRG. 21134.1  | 0.42704   | coding    |
| MSTRG. 21151.1  | -1.21248  | noncoding |
| MSTRG. 21152.1  | 2.16105   | coding    |
| MSTRG. 21153.1  | 2.06637   | coding    |
| MSTRG. 21154.1  | 1.99076   | coding    |
| MSTRG. 21154.2  | 0.029083  | coding    |
| MSTRG. 21155.1  | -1.14081  | noncoding |
| MSTRG. 21156.2  | 1.70974   | coding    |
| MSTRG. 21154.3  | 0.673575  | coding    |
| MSTRG. 21154.4  | 2.04625   | coding    |
| MSTRG. 21159.3  | 2.29329   | coding    |
| MSTRG. 21159.4  | 1.92752   | coding    |
| MSTRG. 21159.5  | 1.46707   | coding    |
| MSTRG. 21159.6  | 1.56679   | coding    |
| MSTRG. 21159.7  | -0.343759 | noncoding |

|                |           |           |
|----------------|-----------|-----------|
| MSTRG. 21162.6 | 1.42733   | coding    |
| MSTRG. 21162.7 | 2.20671   | coding    |
| MSTRG. 21163.1 | -0.719047 | noncoding |
| MSTRG. 21163.2 | 0.578014  | coding    |
| MSTRG. 21173.1 | 2.71684   | coding    |
| MSTRG. 21169.1 | -0.012698 | noncoding |
| MSTRG. 21176.1 | -1.19656  | noncoding |
| MSTRG. 21176.2 | -1.25546  | noncoding |
| MSTRG. 21179.3 | 2.62294   | coding    |
| MSTRG. 21179.2 | 2.60964   | coding    |
| MSTRG. 21179.5 | 2.56701   | coding    |
| MSTRG. 21179.6 | 2.59155   | coding    |
| MSTRG. 21181.2 | 1.71251   | coding    |
| MSTRG. 21198.1 | -0.033008 | noncoding |
| MSTRG. 21198.2 | 0.706764  | coding    |
| MSTRG. 21198.3 | 1.31534   | coding    |
| MSTRG. 21212.1 | 1.87356   | coding    |
| MSTRG. 21212.2 | 1.83401   | coding    |
| MSTRG. 21213.2 | 1.83653   | coding    |
| MSTRG. 21216.2 | 0.957467  | coding    |
| MSTRG. 21218.2 | -0.178289 | noncoding |
| MSTRG. 21218.3 | -0.072231 | noncoding |
| MSTRG. 21220.3 | 0.378342  | coding    |
| MSTRG. 21220.4 | 0.18379   | coding    |
| MSTRG. 21224.1 | -0.591486 | noncoding |
| MSTRG. 21235.3 | 2.81359   | coding    |
| MSTRG. 21234.1 | -2.04491  | noncoding |
| MSTRG. 21244.1 | -1.64923  | noncoding |
| MSTRG. 21248.2 | -1.2678   | noncoding |
| MSTRG. 21249.1 | -1.14299  | noncoding |
| MSTRG. 21250.2 | 1.20577   | coding    |
| MSTRG. 21251.1 | -1.10309  | noncoding |
| MSTRG. 21251.2 | -0.555002 | noncoding |
| MSTRG. 21252.1 | -1.60384  | noncoding |
| MSTRG. 21252.2 | -1.67686  | noncoding |
| MSTRG. 21254.1 | -1.12578  | noncoding |
| MSTRG. 21256.5 | 0.696685  | coding    |
| MSTRG. 21256.6 | -0.470071 | noncoding |
| MSTRG. 21257.1 | -1.10873  | noncoding |
| MSTRG. 21260.1 | 1.67169   | coding    |
| MSTRG. 21262.1 | -0.236898 | noncoding |
| MSTRG. 21268.1 | -1.26115  | noncoding |
| MSTRG. 21269.1 | 0.641781  | coding    |
| MSTRG. 21269.2 | -1.14668  | noncoding |
| MSTRG. 21271.2 | 0.983642  | coding    |
| MSTRG. 21272.1 | -1.53318  | noncoding |
| MSTRG. 21278.2 | 1.88347   | coding    |
| MSTRG. 21301.3 | 2.85169   | coding    |
| MSTRG. 21302.1 | 0.126247  | coding    |
| MSTRG. 21308.1 | 0.22983   | coding    |
| MSTRG. 21309.2 | 1.86665   | coding    |
| MSTRG. 21310.3 | 1.90051   | coding    |
| MSTRG. 21315.2 | 1.78498   | coding    |
| MSTRG. 21316.1 | -0.991974 | noncoding |

|                 |           |           |
|-----------------|-----------|-----------|
| MSTRG. 21317.1  | -2.50452  | noncoding |
| MSTRG. 21318.1  | -0.93185  | noncoding |
| MSTRG. 21315.4  | 0.138812  | coding    |
| MSTRG. 21314.1  | 1.02368   | coding    |
| MSTRG. 21319.1  | 1.57887   | coding    |
| MSTRG. 21323.1  | 2.52692   | coding    |
| MSTRG. 21323.5  | 2.62039   | coding    |
| MSTRG. 21323.3  | 2.62827   | coding    |
| MSTRG. 21323.8  | 2.81252   | coding    |
| MSTRG. 21323.7  | 2.77062   | coding    |
| MSTRG. 21323.9  | 2.75766   | coding    |
| MSTRG. 21321.1  | 2.53825   | coding    |
| MSTRG. 21321.2  | 2.58945   | coding    |
| MSTRG. 21321.3  | 2.553     | coding    |
| MSTRG. 21324.2  | 0.79352   | coding    |
| MSTRG. 21324.3  | 1.26089   | coding    |
| MSTRG. 21326.1  | -0.593091 | noncoding |
| MSTRG. 21327.3  | 1.75642   | coding    |
| MSTRG. 21327.6  | 1.49368   | coding    |
| MSTRG. 21327.8  | 1.97756   | coding    |
| MSTRG. 21330.2  | -0.797263 | noncoding |
| MSTRG. 21333.4  | 0.05133   | coding    |
| MSTRG. 21334.5  | 1.50768   | coding    |
| MSTRG. 21334.6  | 1.60184   | coding    |
| MSTRG. 21334.7  | 1.71723   | coding    |
| MSTRG. 21334.8  | 1.63564   | coding    |
| MSTRG. 21334.9  | 1.64422   | coding    |
| MSTRG. 21334.10 | 1.99457   | coding    |
| MSTRG. 21335.1  | 0.199179  | coding    |
| MSTRG. 21336.1  | 0.785658  | coding    |
| MSTRG. 21336.2  | 0.852016  | coding    |
| MSTRG. 21336.3  | 0.83986   | coding    |
| MSTRG. 21338.4  | 0.07612   | coding    |
| MSTRG. 21338.6  | 0.761571  | coding    |
| MSTRG. 21338.7  | 0.901263  | coding    |
| MSTRG. 21338.9  | -0.257028 | noncoding |
| MSTRG. 21338.10 | -0.122751 | noncoding |
| MSTRG. 21338.13 | 0.64312   | coding    |
| MSTRG. 21338.12 | 1.18942   | coding    |
| MSTRG. 21342.1  | -0.275333 | noncoding |
| MSTRG. 21343.3  | -0.147791 | noncoding |
| MSTRG. 21348.4  | 1.10014   | coding    |
| MSTRG. 21348.1  | 0.814722  | coding    |
| MSTRG. 21348.2  | 0.824036  | coding    |
| MSTRG. 21349.1  | 1.49272   | coding    |
| MSTRG. 21351.1  | -1.18767  | noncoding |
| MSTRG. 21345.1  | 0.019928  | coding    |
| MSTRG. 21371.3  | 2.01264   | coding    |
| MSTRG. 21371.5  | 2.31515   | coding    |
| MSTRG. 21371.4  | 3.0422    | coding    |
| MSTRG. 21371.6  | 2.29619   | coding    |
| MSTRG. 21371.7  | 1.55313   | coding    |
| MSTRG. 21371.9  | 1.81676   | coding    |
| MSTRG. 21371.10 | 2.19623   | coding    |

|                  |            |           |
|------------------|------------|-----------|
| MSTRG. 21371. 11 | 2. 15129   | coding    |
| MSTRG. 21371. 13 | 2. 28115   | coding    |
| MSTRG. 21371. 12 | 2. 12482   | coding    |
| MSTRG. 21371. 15 | 2. 10015   | coding    |
| MSTRG. 21371. 16 | 2. 34343   | coding    |
| MSTRG. 21371. 17 | 1. 91036   | coding    |
| MSTRG. 21371. 18 | 2. 57419   | coding    |
| MSTRG. 21372. 1  | -0. 598356 | noncoding |
| MSTRG. 21373. 1  | -0. 807029 | noncoding |
| MSTRG. 21372. 2  | -1. 69569  | noncoding |
| MSTRG. 21356. 1  | 1. 59181   | coding    |
| MSTRG. 21359. 1  | 1. 0447    | coding    |
| MSTRG. 21361. 1  | 2. 1088    | coding    |
| MSTRG. 21362. 1  | -0. 586108 | noncoding |
| MSTRG. 21363. 1  | 1. 5552    | coding    |
| MSTRG. 21368. 2  | 2. 27357   | coding    |
| MSTRG. 21368. 3  | 1. 28591   | coding    |
| MSTRG. 21369. 1  | -2. 14695  | noncoding |
| MSTRG. 21377. 1  | -1. 99746  | noncoding |
| MSTRG. 21375. 1  | -1. 60699  | noncoding |
| MSTRG. 21384. 1  | -0. 164272 | noncoding |
| MSTRG. 21385. 5  | 1. 28846   | coding    |
| MSTRG. 21385. 4  | 2. 95158   | coding    |
| MSTRG. 21385. 7  | 0. 206567  | coding    |
| MSTRG. 21385. 8  | -1. 61804  | noncoding |
| MSTRG. 21385. 9  | 1. 16721   | coding    |
| MSTRG. 21385. 10 | -0. 579365 | noncoding |
| MSTRG. 21395. 3  | 1. 49097   | coding    |
| MSTRG. 21396. 3  | 2. 62854   | coding    |
| MSTRG. 21396. 4  | 0. 699338  | coding    |
| MSTRG. 21406. 1  | 1. 41369   | coding    |
| MSTRG. 21406. 2  | 0. 431127  | coding    |
| MSTRG. 21400. 1  | -1. 31799  | noncoding |
| MSTRG. 21402. 1  | -1. 54245  | noncoding |
| MSTRG. 21403. 1  | -2. 23227  | noncoding |
| MSTRG. 21414. 1  | -2. 517    | noncoding |
| MSTRG. 21415. 1  | -0. 014081 | noncoding |
| MSTRG. 21416. 1  | -0. 413953 | noncoding |
| MSTRG. 21433. 1  | 2. 34803   | coding    |
| MSTRG. 21433. 4  | 2. 2503    | coding    |
| MSTRG. 21433. 3  | 2. 29319   | coding    |
| MSTRG. 21433. 5  | 2. 01741   | coding    |
| MSTRG. 21433. 6  | 1. 33549   | coding    |
| MSTRG. 21433. 7  | 1. 86047   | coding    |
| MSTRG. 21433. 8  | 1. 85841   | coding    |
| MSTRG. 21433. 9  | 1. 06095   | coding    |
| MSTRG. 21434. 1  | 0. 071289  | coding    |
| MSTRG. 21433. 10 | 2. 0583    | coding    |
| MSTRG. 21433. 11 | 0. 773844  | coding    |
| MSTRG. 21433. 13 | 2. 13495   | coding    |
| MSTRG. 21433. 14 | 2. 18422   | coding    |
| MSTRG. 21433. 15 | 2. 04344   | coding    |
| MSTRG. 21433. 16 | 2. 16202   | coding    |
| MSTRG. 21433. 18 | 2. 06799   | coding    |



|                  |            |           |
|------------------|------------|-----------|
| MSTRG. 21433. 19 | 0. 910456  | coding    |
| MSTRG. 21433. 20 | 1. 54715   | coding    |
| MSTRG. 21433. 22 | -1. 10771  | noncoding |
| MSTRG. 21441. 2  | 0. 527717  | coding    |
| MSTRG. 21419. 1  | 2. 92197   | coding    |
| MSTRG. 21425. 1  | -2. 11329  | noncoding |
| MSTRG. 21427. 2  | 0. 3464    | coding    |
| MSTRG. 21427. 1  | 0. 752848  | coding    |
| MSTRG. 21428. 1  | -2. 0538   | noncoding |
| MSTRG. 21429. 1  | -0. 260717 | noncoding |
| MSTRG. 21432. 1  | -1. 68002  | noncoding |
| MSTRG. 21449. 1  | 0. 970389  | coding    |
| MSTRG. 21449. 4  | 2. 04683   | coding    |
| MSTRG. 21450. 1  | 1. 12415   | coding    |
| MSTRG. 21450. 2  | -0. 923229 | noncoding |
| MSTRG. 21451. 1  | -1. 53698  | noncoding |
| MSTRG. 21449. 5  | -0. 001179 | noncoding |
| MSTRG. 21452. 1  | 0. 655493  | coding    |
| MSTRG. 21453. 1  | 0. 73483   | coding    |
| MSTRG. 21454. 1  | 0. 129906  | coding    |
| MSTRG. 21454. 2  | -0. 138586 | noncoding |
| MSTRG. 21446. 2  | 1. 87089   | coding    |
| MSTRG. 21447. 4  | 0. 039426  | coding    |
| MSTRG. 21447. 2  | 0. 141011  | coding    |
| MSTRG. 21471. 1  | 2. 53329   | coding    |
| MSTRG. 21471. 3  | 2. 50298   | coding    |
| MSTRG. 21472. 1  | -2. 01353  | noncoding |
| MSTRG. 21470. 3  | -1. 09138  | noncoding |
| MSTRG. 21474. 3  | 0. 859599  | coding    |
| MSTRG. 21484. 4  | 1. 95915   | coding    |
| MSTRG. 21486. 2  | 0. 73087   | coding    |
| MSTRG. 21502. 2  | 1. 10466   | coding    |
| MSTRG. 21502. 7  | 0. 76331   | coding    |
| MSTRG. 21502. 4  | 0. 739343  | coding    |
| MSTRG. 21502. 6  | 1. 18095   | coding    |
| MSTRG. 21502. 5  | 1. 14846   | coding    |
| MSTRG. 21503. 1  | -1. 74755  | noncoding |
| MSTRG. 21511. 1  | 0. 233963  | coding    |
| MSTRG. 21520. 1  | -0. 569049 | noncoding |
| MSTRG. 21526. 1  | -1. 30225  | noncoding |
| MSTRG. 21533. 1  | -1. 6053   | noncoding |
| MSTRG. 21534. 1  | -1. 75823  | noncoding |
| MSTRG. 21532. 2  | 1. 64352   | coding    |
| MSTRG. 21535. 1  | 0. 65658   | coding    |
| MSTRG. 21532. 3  | 0. 691567  | coding    |
| MSTRG. 21536. 1  | -3. 16196  | noncoding |
| MSTRG. 21537. 1  | 0. 582167  | coding    |
| MSTRG. 21532. 4  | 0. 634121  | coding    |
| MSTRG. 21538. 1  | -0. 746852 | noncoding |
| MSTRG. 21499. 2  | 0. 238099  | coding    |
| MSTRG. 21499. 3  | -0. 009452 | noncoding |
| MSTRG. 21552. 1  | 0. 09164   | coding    |
| MSTRG. 21553. 1  | 0. 088193  | coding    |
| MSTRG. 21555. 1  | 0. 834158  | coding    |

|                 |           |           |
|-----------------|-----------|-----------|
| MSTRG. 21556.1  | 0.511629  | coding    |
| MSTRG. 21569.1  | -1.74433  | noncoding |
| MSTRG. 21572.1  | -0.057092 | noncoding |
| MSTRG. 21572.2  | -0.642141 | noncoding |
| MSTRG. 21573.5  | 1.28006   | coding    |
| MSTRG. 21573.6  | 2.02555   | coding    |
| MSTRG. 21573.7  | 1.85673   | coding    |
| MSTRG. 21573.9  | 1.875     | coding    |
| MSTRG. 21573.14 | 1.54201   | coding    |
| MSTRG. 21575.1  | 1.48468   | coding    |
| MSTRG. 21580.1  | 0.473357  | coding    |
| MSTRG. 21580.2  | 1.14387   | coding    |
| MSTRG. 21580.3  | -0.884984 | noncoding |
| MSTRG. 21598.1  | -1.95798  | noncoding |
| MSTRG. 21612.1  | -1.82739  | noncoding |
| MSTRG. 21649.1  | -0.365569 | noncoding |
| MSTRG. 21656.9  | 1.68484   | coding    |
| MSTRG. 21657.1  | -1.50314  | noncoding |
| MSTRG. 21670.1  | -1.22049  | noncoding |
| MSTRG. 21670.2  | -2.33307  | noncoding |
| MSTRG. 21695.4  | 1.00898   | coding    |
| MSTRG. 21696.1  | -0.233941 | noncoding |
| MSTRG. 21695.6  | 0.626187  | coding    |
| MSTRG. 21697.1  | -1.44972  | noncoding |
| MSTRG. 21695.7  | 0.353467  | coding    |
| MSTRG. 21698.1  | -0.442233 | noncoding |
| MSTRG. 21695.10 | 1.25426   | coding    |
| MSTRG. 21708.1  | -2.32121  | noncoding |
| MSTRG. 21674.1  | -0.575368 | noncoding |
| MSTRG. 21676.1  | -1.56934  | noncoding |
| MSTRG. 21680.1  | -1.1018   | noncoding |
| MSTRG. 21729.1  | -1.59037  | noncoding |
| MSTRG. 21725.1  | -0.650724 | noncoding |
| MSTRG. 21739.1  | 0.327452  | coding    |
| MSTRG. 21741.2  | 0.231239  | coding    |
| MSTRG. 21741.1  | 0.586451  | coding    |
| MSTRG. 21749.1  | 2.53505   | coding    |
| MSTRG. 21749.4  | 1.74215   | coding    |
| MSTRG. 21749.5  | 0.489401  | coding    |
| MSTRG. 21749.6  | 0.388071  | coding    |
| MSTRG. 21749.7  | -2.74324  | noncoding |
| MSTRG. 21751.1  | -0.868697 | noncoding |
| MSTRG. 21752.1  | -1.19977  | noncoding |
| MSTRG. 21749.8  | -0.87548  | noncoding |
| MSTRG. 21753.1  | 1.27424   | coding    |
| MSTRG. 21754.1  | -0.284961 | noncoding |
| MSTRG. 21754.2  | 0.931979  | coding    |
| MSTRG. 21749.9  | 1.31793   | coding    |
| MSTRG. 21755.1  | -1.72316  | noncoding |
| MSTRG. 21755.2  | -1.6688   | noncoding |
| MSTRG. 21760.1  | 1.1859    | coding    |
| MSTRG. 21771.6  | 1.7342    | coding    |
| MSTRG. 21772.1  | 0.071646  | coding    |
| MSTRG. 21771.19 | 1.87898   | coding    |

|                 |           |           |
|-----------------|-----------|-----------|
| MSTRG. 21771.20 | 1.59821   | coding    |
| MSTRG. 21771.21 | 1.59837   | coding    |
| MSTRG. 21771.22 | 1.15642   | coding    |
| MSTRG. 21771.23 | 1.72278   | coding    |
| MSTRG. 21773.1  | 0.7516    | coding    |
| MSTRG. 21775.1  | -0.362642 | noncoding |
| MSTRG. 21771.24 | 2.61443   | coding    |
| MSTRG. 21771.25 | 2.79022   | coding    |
| MSTRG. 21771.26 | 2.75025   | coding    |
| MSTRG. 21771.27 | 2.6793    | coding    |
| MSTRG. 21771.28 | 1.15949   | coding    |
| MSTRG. 21771.29 | 2.56498   | coding    |
| MSTRG. 21763.1  | -2.95231  | noncoding |
| MSTRG. 21779.2  | 2.09998   | coding    |
| MSTRG. 21779.1  | 2.10268   | coding    |
| MSTRG. 21790.1  | -1.11824  | noncoding |
| MSTRG. 21791.2  | 1.52178   | coding    |
| MSTRG. 21795.1  | -0.111663 | noncoding |
| MSTRG. 21795.3  | 0.434532  | coding    |
| MSTRG. 21795.4  | 0.845142  | coding    |
| MSTRG. 21795.5  | 0.394498  | coding    |
| MSTRG. 21795.6  | 0.505366  | coding    |
| MSTRG. 21796.1  | -0.536732 | noncoding |
| MSTRG. 21797.1  | 1.78554   | coding    |
| MSTRG. 21797.2  | 1.92903   | coding    |
| MSTRG. 21794.1  | -2.3119   | noncoding |
| MSTRG. 21806.2  | 1.34049   | coding    |
| MSTRG. 21812.2  | -0.43644  | noncoding |
| MSTRG. 21812.1  | 0.864856  | coding    |
| MSTRG. 21812.4  | 1.20033   | coding    |
| MSTRG. 21808.2  | 1.30978   | coding    |
| MSTRG. 21815.1  | -0.569001 | noncoding |
| MSTRG. 21817.2  | -1.55054  | noncoding |
| MSTRG. 21818.3  | -0.228123 | noncoding |
| MSTRG. 21819.1  | 0.704253  | coding    |
| MSTRG. 21820.1  | -0.155672 | noncoding |
| MSTRG. 21820.2  | -0.551715 | noncoding |
| MSTRG. 21827.2  | 0.330674  | coding    |
| MSTRG. 21827.3  | 1.45316   | coding    |
| MSTRG. 21829.2  | 2.53675   | coding    |
| MSTRG. 21829.3  | 2.62607   | coding    |
| MSTRG. 21831.1  | 2.24427   | coding    |
| MSTRG. 21831.10 | 2.10469   | coding    |
| MSTRG. 21831.11 | 2.23057   | coding    |
| MSTRG. 21831.3  | 2.36709   | coding    |
| MSTRG. 21831.5  | 2.36411   | coding    |
| MSTRG. 21831.7  | 2.22978   | coding    |
| MSTRG. 21831.9  | 2.01589   | coding    |
| MSTRG. 21831.12 | -0.884045 | noncoding |
| MSTRG. 21831.13 | 0.326893  | coding    |
| MSTRG. 21831.14 | 0.607962  | coding    |
| MSTRG. 21830.1  | -2.20608  | noncoding |
| MSTRG. 21834.3  | 1.31508   | coding    |
| MSTRG. 21834.2  | 1.27141   | coding    |

|                 |           |           |
|-----------------|-----------|-----------|
| MSTRG. 21837.5  | 2.0341    | coding    |
| MSTRG. 21837.6  | 2.09134   | coding    |
| MSTRG. 21837.8  | 2.03595   | coding    |
| MSTRG. 21837.9  | 2.08368   | coding    |
| MSTRG. 21842.2  | 2.67982   | coding    |
| MSTRG. 21842.6  | 0.675973  | coding    |
| MSTRG. 21841.1  | -2.16177  | noncoding |
| MSTRG. 21846.1  | 1.94433   | coding    |
| MSTRG. 21846.2  | 0.404987  | coding    |
| MSTRG. 21846.3  | 1.68414   | coding    |
| MSTRG. 21856.2  | 0.932095  | coding    |
| MSTRG. 21863.1  | -1.12073  | noncoding |
| MSTRG. 21864.2  | 0.530096  | coding    |
| MSTRG. 21865.1  | -0.11953  | noncoding |
| MSTRG. 21850.3  | 0.531002  | coding    |
| MSTRG. 21850.2  | 0.715634  | coding    |
| MSTRG. 21867.1  | 1.22056   | coding    |
| MSTRG. 21870.1  | -1.84527  | noncoding |
| MSTRG. 21874.1  | -0.339489 | noncoding |
| MSTRG. 21876.1  | -2.00364  | noncoding |
| MSTRG. 21880.1  | 1.2671    | coding    |
| MSTRG. 21880.2  | 1.2616    | coding    |
| MSTRG. 21880.3  | 0.538937  | coding    |
| MSTRG. 21880.4  | -0.104964 | noncoding |
| MSTRG. 21880.5  | 0.453797  | coding    |
| MSTRG. 21880.6  | 0.312852  | coding    |
| MSTRG. 21881.1  | -2.24069  | noncoding |
| MSTRG. 21880.7  | -0.09312  | noncoding |
| MSTRG. 21880.8  | 0.594685  | coding    |
| MSTRG. 21880.9  | 0.370081  | coding    |
| MSTRG. 21885.4  | 0.89903   | coding    |
| MSTRG. 21885.3  | 1.14842   | coding    |
| MSTRG. 21886.1  | -0.737223 | noncoding |
| MSTRG. 21887.1  | 2.84015   | coding    |
| MSTRG. 21889.1  | -1.30989  | noncoding |
| MSTRG. 21890.2  | 0.131454  | coding    |
| MSTRG. 21890.3  | 0.006888  | coding    |
| MSTRG. 21890.4  | -0.433311 | noncoding |
| MSTRG. 21890.5  | -0.077171 | noncoding |
| MSTRG. 21890.6  | 0.336572  | coding    |
| MSTRG. 21890.7  | -0.211497 | noncoding |
| MSTRG. 21890.8  | 0.046997  | coding    |
| MSTRG. 21890.12 | -0.641311 | noncoding |
| MSTRG. 21890.20 | -0.8174   | noncoding |
| MSTRG. 21890.15 | -0.738384 | noncoding |
| MSTRG. 21890.19 | -0.981019 | noncoding |
| MSTRG. 21890.10 | -0.594344 | noncoding |
| MSTRG. 21890.21 | -0.814777 | noncoding |
| MSTRG. 21890.22 | -0.249238 | noncoding |
| MSTRG. 21882.1  | -2.43153  | noncoding |
| MSTRG. 21883.1  | -1.0457   | noncoding |
| MSTRG. 21897.10 | 2.03028   | coding    |
| MSTRG. 21897.11 | 2.01755   | coding    |
| MSTRG. 21897.12 | 2.01646   | coding    |

|                  |            |           |
|------------------|------------|-----------|
| MSTRG. 21897. 13 | 2. 03862   | coding    |
| MSTRG. 21897. 15 | 2. 01525   | coding    |
| MSTRG. 21897. 16 | 2. 0208    | coding    |
| MSTRG. 21897. 17 | 2. 02783   | coding    |
| MSTRG. 21897. 18 | 2. 00683   | coding    |
| MSTRG. 21897. 3  | 2. 0198    | coding    |
| MSTRG. 21897. 4  | 2. 01703   | coding    |
| MSTRG. 21897. 5  | 1. 98862   | coding    |
| MSTRG. 21897. 6  | 2. 0084    | coding    |
| MSTRG. 21897. 7  | 2. 01574   | coding    |
| MSTRG. 21897. 8  | 2. 01158   | coding    |
| MSTRG. 21897. 9  | 2. 00786   | coding    |
| MSTRG. 21898. 2  | -0. 739177 | noncoding |
| MSTRG. 21898. 1  | -0. 942327 | noncoding |
| MSTRG. 21899. 1  | -2. 24504  | noncoding |
| MSTRG. 21897. 19 | 1. 65472   | coding    |
| MSTRG. 21897. 20 | 1. 83642   | coding    |
| MSTRG. 21897. 21 | 1. 0178    | coding    |
| MSTRG. 21897. 22 | 1. 62522   | coding    |
| MSTRG. 21897. 23 | 1. 58587   | coding    |
| MSTRG. 21897. 24 | 1. 54674   | coding    |
| MSTRG. 21897. 25 | 1. 56401   | coding    |
| MSTRG. 21897. 26 | 1. 24578   | coding    |
| MSTRG. 21902. 1  | -2. 00423  | noncoding |
| MSTRG. 21903. 2  | -0. 10094  | noncoding |
| MSTRG. 21903. 5  | -1. 36583  | noncoding |
| MSTRG. 21903. 3  | -1. 98773  | noncoding |
| MSTRG. 21903. 4  | -0. 828709 | noncoding |
| MSTRG. 21903. 7  | -1. 61263  | noncoding |
| MSTRG. 21905. 2  | 0. 124933  | coding    |
| MSTRG. 21905. 3  | 0. 27187   | coding    |
| MSTRG. 21905. 6  | 0. 299606  | coding    |
| MSTRG. 21907. 2  | 2. 08343   | coding    |
| MSTRG. 21907. 3  | 1. 7232    | coding    |
| MSTRG. 21912. 1  | 1. 13323   | coding    |
| MSTRG. 21912. 2  | 0. 781701  | coding    |
| MSTRG. 21900. 5  | 0. 34995   | coding    |
| MSTRG. 21916. 3  | 3. 13414   | coding    |
| MSTRG. 21917. 1  | -0. 069406 | noncoding |
| MSTRG. 21918. 2  | 0. 266727  | coding    |
| MSTRG. 21919. 4  | -1. 07555  | noncoding |
| MSTRG. 21919. 5  | -1. 55721  | noncoding |
| MSTRG. 21920. 7  | 1. 56847   | coding    |
| MSTRG. 21925. 1  | 2. 2187    | coding    |
| MSTRG. 21926. 1  | -0. 924874 | noncoding |
| MSTRG. 21925. 2  | 1. 90117   | coding    |
| MSTRG. 21925. 3  | 2. 15462   | coding    |
| MSTRG. 21927. 1  | -2. 72979  | noncoding |
| MSTRG. 21927. 2  | -1. 34553  | noncoding |
| MSTRG. 21925. 4  | 2. 14421   | coding    |
| MSTRG. 21925. 5  | 2. 19536   | coding    |
| MSTRG. 21928. 2  | 1. 15047   | coding    |
| MSTRG. 21921. 2  | 0. 365633  | coding    |
| MSTRG. 21932. 2  | 1. 82731   | coding    |

|                 |           |           |
|-----------------|-----------|-----------|
| MSTRG. 21932.3  | 1.6349    | coding    |
| MSTRG. 21934.2  | 1.54139   | coding    |
| MSTRG. 21935.2  | -1.0861   | noncoding |
| MSTRG. 21941.1  | 2.35847   | coding    |
| MSTRG. 21941.2  | 2.22578   | coding    |
| MSTRG. 21942.1  | 1.82529   | coding    |
| MSTRG. 21942.5  | 1.30808   | coding    |
| MSTRG. 21939.2  | 3.00454   | coding    |
| MSTRG. 21940.1  | -1.51239  | noncoding |
| MSTRG. 21939.3  | 2.84356   | coding    |
| MSTRG. 21939.4  | 2.9199    | coding    |
| MSTRG. 21943.1  | 2.10146   | coding    |
| MSTRG. 21943.2  | 2.11945   | coding    |
| MSTRG. 21949.1  | 0.806875  | coding    |
| MSTRG. 21953.1  | -2.92615  | noncoding |
| MSTRG. 21955.1  | -0.540813 | noncoding |
| MSTRG. 21958.4  | -1.84186  | noncoding |
| MSTRG. 21958.5  | 0.101995  | coding    |
| MSTRG. 21958.10 | 0.676859  | coding    |
| MSTRG. 21958.3  | -0.873522 | noncoding |
| MSTRG. 21958.6  | -0.155427 | noncoding |
| MSTRG. 21958.7  | 0.744412  | coding    |
| MSTRG. 21958.8  | 0.15583   | coding    |
| MSTRG. 21958.9  | 0.481417  | coding    |
| MSTRG. 21959.1  | -1.30005  | noncoding |
| MSTRG. 21961.2  | 2.48571   | coding    |
| MSTRG. 21961.3  | 2.52393   | coding    |
| MSTRG. 21961.4  | 1.84182   | coding    |
| MSTRG. 21961.5  | 1.66812   | coding    |
| MSTRG. 21963.3  | 1.39034   | coding    |
| MSTRG. 21977.2  | 1.26364   | coding    |
| MSTRG. 21978.2  | 1.82823   | coding    |
| MSTRG. 21980.1  | -0.50344  | noncoding |
| MSTRG. 21985.2  | 1.62997   | coding    |
| MSTRG. 21985.4  | 1.49034   | coding    |
| MSTRG. 21985.5  | 1.48071   | coding    |
| MSTRG. 21985.6  | 2.2236    | coding    |
| MSTRG. 21985.7  | 2.25678   | coding    |
| MSTRG. 21985.8  | 0.580241  | coding    |
| MSTRG. 21987.2  | 0.115076  | coding    |
| MSTRG. 21987.3  | -0.954086 | noncoding |
| MSTRG. 21965.1  | 2.48535   | coding    |
| MSTRG. 21965.2  | -0.495471 | noncoding |
| MSTRG. 21966.1  | -1.39987  | noncoding |
| MSTRG. 21967.1  | 0.417793  | coding    |
| MSTRG. 21967.2  | 0.513767  | coding    |
| MSTRG. 21967.4  | 0.341074  | coding    |
| MSTRG. 21967.5  | 0.284846  | coding    |
| MSTRG. 21967.6  | 0.462416  | coding    |
| MSTRG. 21968.3  | -0.575546 | noncoding |
| MSTRG. 21971.1  | 0.463859  | coding    |
| MSTRG. 21971.2  | 0.679658  | coding    |
| MSTRG. 21972.1  | 0.196541  | coding    |
| MSTRG. 21994.4  | -0.06026  | noncoding |

|                  |            |           |
|------------------|------------|-----------|
| MSTRG. 21994. 3  | -0. 018263 | noncoding |
| MSTRG. 21994. 5  | -0. 422283 | noncoding |
| MSTRG. 21996. 12 | 1. 28791   | coding    |
| MSTRG. 21996. 17 | 1. 13007   | coding    |
| MSTRG. 21996. 14 | 2. 08914   | coding    |
| MSTRG. 21996. 16 | 2. 04201   | coding    |
| MSTRG. 21996. 9  | 1. 66873   | coding    |
| MSTRG. 21996. 10 | 2. 0941    | coding    |
| MSTRG. 21996. 13 | 1. 62594   | coding    |
| MSTRG. 21996. 6  | 2. 16732   | coding    |
| MSTRG. 21996. 8  | 2. 09186   | coding    |
| MSTRG. 21996. 15 | 2. 03774   | coding    |
| MSTRG. 21997. 1  | 0. 486291  | coding    |
| MSTRG. 22002. 2  | 1. 91832   | coding    |
| MSTRG. 22005. 4  | 1. 6391    | coding    |
| MSTRG. 22008. 1  | -0. 034418 | noncoding |
| MSTRG. 22008. 2  | 0. 331243  | coding    |
| MSTRG. 22008. 3  | 0. 17116   | coding    |
| MSTRG. 22010. 3  | 2. 01453   | coding    |
| MSTRG. 22010. 4  | 2. 13074   | coding    |
| MSTRG. 22010. 5  | 2. 24442   | coding    |
| MSTRG. 22021. 1  | -0. 690254 | noncoding |
| MSTRG. 22014. 1  | -1. 56972  | noncoding |
| MSTRG. 22026. 1  | 1. 56729   | coding    |
| MSTRG. 22028. 1  | 0. 621857  | coding    |
| MSTRG. 22027. 4  | -0. 068703 | noncoding |
| MSTRG. 22029. 1  | -1. 41105  | noncoding |
| MSTRG. 22027. 6  | 2. 31259   | coding    |
| MSTRG. 22034. 2  | 1. 54515   | coding    |
| MSTRG. 22034. 5  | 0. 628454  | coding    |
| MSTRG. 22030. 3  | 1. 98103   | coding    |
| MSTRG. 22030. 2  | 1. 91533   | coding    |
| MSTRG. 22030. 4  | 1. 83808   | coding    |
| MSTRG. 22038. 3  | 2. 76584   | coding    |
| MSTRG. 22041. 3  | 1. 32412   | coding    |
| MSTRG. 22041. 4  | 0. 19595   | coding    |
| MSTRG. 22042. 1  | -2. 43652  | noncoding |
| MSTRG. 22043. 1  | 1. 03755   | coding    |
| MSTRG. 22043. 3  | 1. 29206   | coding    |
| MSTRG. 22043. 4  | 1. 16123   | coding    |
| MSTRG. 22045. 2  | 0. 97913   | coding    |
| MSTRG. 22046. 2  | 0. 708688  | coding    |
| MSTRG. 22050. 3  | 1. 70421   | coding    |
| MSTRG. 22051. 1  | -2. 44141  | noncoding |
| MSTRG. 22051. 2  | -2. 45438  | noncoding |
| MSTRG. 22050. 4  | 1. 0853    | coding    |
| MSTRG. 22056. 1  | -0. 700747 | noncoding |
| MSTRG. 22058. 1  | -1. 92086  | noncoding |
| MSTRG. 22063. 3  | 2. 06173   | coding    |
| MSTRG. 22063. 4  | 2. 43435   | coding    |
| MSTRG. 22063. 5  | 1. 32087   | coding    |
| MSTRG. 22059. 1  | -0. 329137 | noncoding |
| MSTRG. 22059. 2  | -1. 0694   | noncoding |
| MSTRG. 22064. 3  | 1. 79656   | coding    |

|                  |            |           |
|------------------|------------|-----------|
| MSTRG. 22064. 4  | 2. 03732   | coding    |
| MSTRG. 22065. 2  | 0. 671172  | coding    |
| MSTRG. 22068. 1  | 2. 52449   | coding    |
| MSTRG. 22071. 2  | 1. 6017    | coding    |
| MSTRG. 22072. 1  | 2. 4017    | coding    |
| MSTRG. 22072. 3  | 1. 82448   | coding    |
| MSTRG. 22074. 1  | -1. 05759  | noncoding |
| MSTRG. 22070. 1  | 0. 658519  | coding    |
| MSTRG. 22070. 2  | 0. 697509  | coding    |
| MSTRG. 22075. 2  | 1. 16775   | coding    |
| MSTRG. 22075. 3  | 1. 0601    | coding    |
| MSTRG. 22075. 4  | 1. 12365   | coding    |
| MSTRG. 22076. 1  | -1. 87291  | noncoding |
| MSTRG. 22078. 3  | 1. 66595   | coding    |
| MSTRG. 22080. 1  | 0. 513439  | coding    |
| MSTRG. 22080. 6  | -0. 093059 | noncoding |
| MSTRG. 22113. 6  | 2. 75893   | coding    |
| MSTRG. 22113. 5  | 2. 8786    | coding    |
| MSTRG. 22113. 7  | 2. 75182   | coding    |
| MSTRG. 22114. 1  | 0. 692446  | coding    |
| MSTRG. 22113. 9  | 2. 77418   | coding    |
| MSTRG. 22115. 3  | 0. 929683  | coding    |
| MSTRG. 22116. 1  | 0. 263449  | coding    |
| MSTRG. 22117. 1  | -2. 02104  | noncoding |
| MSTRG. 22118. 4  | 1. 76687   | coding    |
| MSTRG. 22118. 2  | 1. 88877   | coding    |
| MSTRG. 22118. 3  | 0. 597183  | coding    |
| MSTRG. 22118. 5  | 1. 29244   | coding    |
| MSTRG. 22126. 1  | 0. 766983  | coding    |
| MSTRG. 22126. 2  | 0. 686035  | coding    |
| MSTRG. 22126. 3  | 0. 727925  | coding    |
| MSTRG. 22126. 4  | 0. 70995   | coding    |
| MSTRG. 22126. 5  | 1. 34668   | coding    |
| MSTRG. 22126. 10 | 0. 69706   | coding    |
| MSTRG. 22082. 3  | 2. 71338   | coding    |
| MSTRG. 22082. 5  | 2. 15643   | coding    |
| MSTRG. 22082. 4  | 2. 64306   | coding    |
| MSTRG. 22084. 2  | 1. 29335   | coding    |
| MSTRG. 22086. 1  | 0. 031071  | coding    |
| MSTRG. 22089. 3  | 1. 16849   | coding    |
| MSTRG. 22089. 4  | 1. 12181   | coding    |
| MSTRG. 22089. 5  | 0. 631566  | coding    |
| MSTRG. 22091. 1  | -1. 26972  | noncoding |
| MSTRG. 22091. 3  | -1. 03367  | noncoding |
| MSTRG. 22098. 2  | -0. 460506 | noncoding |
| MSTRG. 22099. 2  | 1. 55699   | coding    |
| MSTRG. 22103. 2  | 0. 647581  | coding    |
| MSTRG. 22139. 5  | 1. 16435   | coding    |
| MSTRG. 22139. 6  | 0. 638947  | coding    |
| MSTRG. 22141. 1  | 0. 133638  | coding    |
| MSTRG. 22141. 2  | -0. 708812 | noncoding |
| MSTRG. 22141. 3  | -0. 813665 | noncoding |
| MSTRG. 22142. 1  | 3. 3643    | coding    |
| MSTRG. 22145. 2  | -0. 208738 | noncoding |



|                  |            |           |
|------------------|------------|-----------|
| MSTRG. 22146. 1  | 1. 43353   | coding    |
| MSTRG. 22146. 2  | 1. 40821   | coding    |
| MSTRG. 22146. 3  | 1. 37654   | coding    |
| MSTRG. 22147. 2  | 1. 6993    | coding    |
| MSTRG. 22147. 3  | 1. 87922   | coding    |
| MSTRG. 22155. 1  | 2. 89614   | coding    |
| MSTRG. 22155. 2  | 2. 98205   | coding    |
| MSTRG. 22155. 4  | 2. 94975   | coding    |
| MSTRG. 22155. 3  | 3. 04794   | coding    |
| MSTRG. 22155. 7  | 0. 602907  | coding    |
| MSTRG. 22150. 1  | -0. 266581 | noncoding |
| MSTRG. 22152. 2  | 1. 78288   | coding    |
| MSTRG. 22152. 3  | 1. 77112   | coding    |
| MSTRG. 22152. 5  | 1. 56242   | coding    |
| MSTRG. 22153. 1  | 1. 7953    | coding    |
| MSTRG. 22168. 1  | -0. 374382 | noncoding |
| MSTRG. 22179. 1  | 0. 483157  | coding    |
| MSTRG. 22179. 2  | 0. 225602  | coding    |
| MSTRG. 22179. 3  | -0. 038345 | noncoding |
| MSTRG. 22179. 4  | 0. 125343  | coding    |
| MSTRG. 22179. 5  | 0. 081273  | coding    |
| MSTRG. 22179. 7  | 0. 139013  | coding    |
| MSTRG. 22179. 8  | -0. 012164 | noncoding |
| MSTRG. 22179. 9  | -0. 198328 | noncoding |
| MSTRG. 22179. 6  | -0. 003954 | noncoding |
| MSTRG. 22179. 10 | 0. 1231    | coding    |
| MSTRG. 22179. 11 | 0. 013138  | coding    |
| MSTRG. 22179. 13 | 0. 102273  | coding    |
| MSTRG. 22179. 12 | -0. 096224 | noncoding |
| MSTRG. 22179. 14 | -0. 199032 | noncoding |
| MSTRG. 22179. 15 | 0. 088207  | coding    |
| MSTRG. 22179. 16 | -0. 12801  | noncoding |
| MSTRG. 22181. 1  | 0. 083505  | coding    |
| MSTRG. 22181. 2  | 0. 263187  | coding    |
| MSTRG. 22181. 3  | 0. 097873  | coding    |
| MSTRG. 22181. 4  | 0. 241721  | coding    |
| MSTRG. 22181. 5  | 0. 397572  | coding    |
| MSTRG. 22181. 6  | 0. 559604  | coding    |
| MSTRG. 22182. 1  | 1. 47344   | coding    |
| MSTRG. 22182. 3  | 0. 899887  | coding    |
| MSTRG. 22181. 7  | 0. 572329  | coding    |
| MSTRG. 22184. 1  | 1. 20201   | coding    |
| MSTRG. 22184. 2  | 0. 286584  | coding    |
| MSTRG. 22184. 3  | 1. 16662   | coding    |
| MSTRG. 22184. 5  | 0. 898734  | coding    |
| MSTRG. 22184. 6  | 1. 22974   | coding    |
| MSTRG. 22185. 1  | -1. 08881  | noncoding |
| MSTRG. 22170. 2  | 0. 618438  | coding    |
| MSTRG. 22172. 3  | 0. 835124  | coding    |
| MSTRG. 22175. 1  | 1. 97744   | coding    |
| MSTRG. 22175. 2  | 2. 00738   | coding    |
| MSTRG. 22189. 2  | -1. 28722  | noncoding |
| MSTRG. 22190. 1  | -0. 958934 | noncoding |
| MSTRG. 22190. 2  | -0. 272615 | noncoding |

|                |           |           |
|----------------|-----------|-----------|
| MSTRG. 22191.2 | -0.485111 | noncoding |
| MSTRG. 22192.3 | 1.39679   | coding    |
| MSTRG. 22195.3 | 2.27464   | coding    |
| MSTRG. 22195.2 | 2.13859   | coding    |
| MSTRG. 22178.2 | -0.345294 | noncoding |
| MSTRG. 22178.3 | -0.435333 | noncoding |
| MSTRG. 22188.1 | -1.39235  | noncoding |
| MSTRG. 22197.1 | -2.43196  | noncoding |
| MSTRG. 22219.1 | 2.01825   | coding    |
| MSTRG. 22220.1 | -0.794748 | noncoding |
| MSTRG. 22219.2 | 0.638132  | coding    |
| MSTRG. 22219.5 | 1.38148   | coding    |
| MSTRG. 22219.3 | 1.26839   | coding    |
| MSTRG. 22223.5 | -0.588589 | noncoding |
| MSTRG. 22224.1 | -0.03206  | noncoding |
| MSTRG. 22226.1 | 0.054682  | coding    |
| MSTRG. 22228.1 | 1.17795   | coding    |
| MSTRG. 22228.2 | -0.925968 | noncoding |
| MSTRG. 22223.6 | 1.06942   | coding    |
| MSTRG. 22230.1 | -0.111876 | noncoding |
| MSTRG. 22199.1 | -1.20139  | noncoding |
| MSTRG. 22200.1 | -0.054344 | noncoding |
| MSTRG. 22203.2 | 0.077483  | coding    |
| MSTRG. 22204.1 | -1.0858   | noncoding |
| MSTRG. 22205.1 | 1.46225   | coding    |
| MSTRG. 22205.2 | 1.24123   | coding    |
| MSTRG. 22205.4 | 0.607428  | coding    |
| MSTRG. 22207.3 | 1.6082    | coding    |
| MSTRG. 22207.7 | 1.4187    | coding    |
| MSTRG. 22207.9 | 1.63846   | coding    |
| MSTRG. 22208.4 | 0.803429  | coding    |
| MSTRG. 22211.5 | 0.800559  | coding    |
| MSTRG. 22212.2 | 2.2104    | coding    |
| MSTRG. 22212.3 | 2.36348   | coding    |
| MSTRG. 22213.4 | 1.43096   | coding    |
| MSTRG. 22213.5 | 1.35976   | coding    |
| MSTRG. 22213.2 | 1.11429   | coding    |
| MSTRG. 22213.3 | 1.45914   | coding    |
| MSTRG. 22214.4 | 0.075384  | coding    |
| MSTRG. 22216.7 | 2.68411   | coding    |
| MSTRG. 22217.1 | -1.75034  | noncoding |
| MSTRG. 22238.4 | 0.062282  | coding    |
| MSTRG. 22238.6 | -0.192646 | noncoding |
| MSTRG. 22238.7 | -0.69343  | noncoding |
| MSTRG. 22239.1 | 0.436004  | coding    |
| MSTRG. 22240.1 | -1.42765  | noncoding |
| MSTRG. 22241.1 | 0.512231  | coding    |
| MSTRG. 22242.2 | 1.3806    | coding    |
| MSTRG. 22242.3 | 0.920054  | coding    |
| MSTRG. 22242.4 | 1.34238   | coding    |
| MSTRG. 22245.2 | 1.722     | coding    |
| MSTRG. 22246.3 | 0.024588  | coding    |
| MSTRG. 22251.3 | 1.01717   | coding    |
| MSTRG. 22251.2 | 2.41186   | coding    |

|                 |           |           |
|-----------------|-----------|-----------|
| MSTRG. 22251.4  | 2.88215   | coding    |
| MSTRG. 22261.1  | 0.766076  | coding    |
| MSTRG. 22261.2  | 1.35714   | coding    |
| MSTRG. 22262.2  | -0.531422 | noncoding |
| MSTRG. 22262.3  | 0.327409  | coding    |
| MSTRG. 22262.4  | 0.471706  | coding    |
| MSTRG. 22262.5  | -0.511294 | noncoding |
| MSTRG. 22265.1  | -1.28503  | noncoding |
| MSTRG. 22264.3  | 2.69133   | coding    |
| MSTRG. 22264.4  | 2.79466   | coding    |
| MSTRG. 22276.2  | 0.17245   | coding    |
| MSTRG. 22277.1  | 1.22629   | coding    |
| MSTRG. 22277.3  | 1.32352   | coding    |
| MSTRG. 22277.10 | 1.07335   | coding    |
| MSTRG. 22277.5  | 1.08533   | coding    |
| MSTRG. 22277.9  | 1.46885   | coding    |
| MSTRG. 22277.7  | 1.74862   | coding    |
| MSTRG. 22277.11 | -0.141292 | noncoding |
| MSTRG. 22269.2  | 0.398419  | coding    |
| MSTRG. 22269.3  | 0.202457  | coding    |
| MSTRG. 22271.1  | -1.72502  | noncoding |
| MSTRG. 22282.1  | -0.537847 | noncoding |
| MSTRG. 22282.2  | -0.069597 | noncoding |
| MSTRG. 22282.3  | -0.104148 | noncoding |
| MSTRG. 22283.3  | 0.1941    | coding    |
| MSTRG. 22284.2  | 2.03397   | coding    |
| MSTRG. 22285.1  | 0.999155  | coding    |
| MSTRG. 22286.3  | 1.52004   | coding    |
| MSTRG. 22286.6  | 1.39772   | coding    |
| MSTRG. 22301.1  | -1.32088  | noncoding |
| MSTRG. 22309.1  | -1.2368   | noncoding |
| MSTRG. 22310.1  | -0.062182 | noncoding |
| MSTRG. 22312.3  | 0.109341  | coding    |
| MSTRG. 22312.2  | 0.538131  | coding    |
| MSTRG. 22306.4  | -0.25602  | noncoding |
| MSTRG. 22315.1  | -1.32666  | noncoding |
| MSTRG. 22306.5  | -1.02788  | noncoding |
| MSTRG. 22306.7  | -0.731726 | noncoding |
| MSTRG. 22306.8  | -0.573512 | noncoding |
| MSTRG. 22306.6  | -0.251342 | noncoding |
| MSTRG. 22306.9  | -0.461466 | noncoding |
| MSTRG. 22306.11 | 0.021112  | coding    |
| MSTRG. 22295.1  | 1.02864   | coding    |
| MSTRG. 22295.3  | -0.405301 | noncoding |
| MSTRG. 22299.3  | 1.71996   | coding    |
| MSTRG. 22300.1  | -0.581533 | noncoding |
| MSTRG. 22300.3  | 0.151217  | coding    |
| MSTRG. 22300.4  | -0.539941 | noncoding |
| MSTRG. 22316.1  | 0.712439  | coding    |
| MSTRG. 22316.2  | 1.11042   | coding    |
| MSTRG. 22319.2  | 0.650599  | coding    |
| MSTRG. 22319.3  | 0.765413  | coding    |
| MSTRG. 22332.7  | 0.30931   | coding    |
| MSTRG. 22326.2  | 0.7342    | coding    |

|                  |            |           |
|------------------|------------|-----------|
| MSTRG. 22327. 1  | 1. 32209   | coding    |
| MSTRG. 22327. 3  | 1. 29706   | coding    |
| MSTRG. 22325. 1  | 0. 055426  | coding    |
| MSTRG. 22335. 2  | 2. 68131   | coding    |
| MSTRG. 22335. 3  | 1. 72881   | coding    |
| MSTRG. 22341. 2  | -0. 516659 | noncoding |
| MSTRG. 22341. 3  | -0. 831493 | noncoding |
| MSTRG. 22344. 1  | 0. 810693  | coding    |
| MSTRG. 22344. 2  | 1. 07637   | coding    |
| MSTRG. 22344. 4  | 1. 02098   | coding    |
| MSTRG. 22344. 5  | -0. 675899 | noncoding |
| MSTRG. 22344. 7  | 0. 472954  | coding    |
| MSTRG. 22344. 9  | 1. 14624   | coding    |
| MSTRG. 22346. 1  | -1. 88062  | noncoding |
| MSTRG. 22344. 11 | 0. 356415  | coding    |
| MSTRG. 22338. 2  | 0. 186095  | coding    |
| MSTRG. 22338. 4  | -0. 563876 | noncoding |
| MSTRG. 22340. 2  | -2. 22954  | noncoding |
| MSTRG. 22348. 3  | -0. 32926  | noncoding |
| MSTRG. 22355. 2  | 0. 926858  | coding    |
| MSTRG. 22356. 1  | 1. 84693   | coding    |
| MSTRG. 22356. 4  | 1. 32812   | coding    |
| MSTRG. 22356. 5  | 1. 74959   | coding    |
| MSTRG. 22356. 3  | 1. 63063   | coding    |
| MSTRG. 22351. 2  | 1. 58247   | coding    |
| MSTRG. 22351. 3  | 1. 48729   | coding    |
| MSTRG. 22358. 2  | -2. 44312  | noncoding |
| MSTRG. 22359. 2  | 3. 13659   | coding    |
| MSTRG. 22361. 2  | -1. 12515  | noncoding |
| MSTRG. 22370. 2  | 2. 05488   | coding    |
| MSTRG. 22370. 4  | 2. 13544   | coding    |
| MSTRG. 22378. 3  | 2. 29326   | coding    |
| MSTRG. 22378. 5  | 2. 41243   | coding    |
| MSTRG. 22378. 6  | 2. 40827   | coding    |
| MSTRG. 22378. 7  | 1. 81002   | coding    |
| MSTRG. 22367. 3  | -0. 879908 | noncoding |
| MSTRG. 22367. 4  | 0. 693003  | coding    |
| MSTRG. 22367. 5  | -0. 352113 | noncoding |
| MSTRG. 22382. 1  | 0. 226715  | coding    |
| MSTRG. 22382. 4  | 0. 511759  | coding    |
| MSTRG. 22382. 5  | 0. 36648   | coding    |
| MSTRG. 22382. 8  | 1. 21172   | coding    |
| MSTRG. 22382. 6  | -0. 053333 | noncoding |
| MSTRG. 22382. 7  | 0. 432587  | coding    |
| MSTRG. 22382. 9  | 0. 651167  | coding    |
| MSTRG. 22383. 1  | 0. 65746   | coding    |
| MSTRG. 22383. 2  | 0. 65746   | coding    |
| MSTRG. 22383. 3  | 0. 65746   | coding    |
| MSTRG. 22383. 4  | 0. 738662  | coding    |
| MSTRG. 22390. 8  | 0. 717701  | coding    |
| MSTRG. 22390. 7  | 0. 874946  | coding    |
| MSTRG. 22390. 6  | 1. 41134   | coding    |
| MSTRG. 22390. 2  | 1. 68709   | coding    |
| MSTRG. 22391. 2  | 0. 231379  | coding    |

|                  |            |           |
|------------------|------------|-----------|
| MSTRG. 22391. 4  | 0. 302515  | coding    |
| MSTRG. 22392. 2  | -0. 291798 | noncoding |
| MSTRG. 22392. 4  | -1. 70037  | noncoding |
| MSTRG. 22394. 2  | -1. 92265  | noncoding |
| MSTRG. 22394. 3  | 0. 292019  | coding    |
| MSTRG. 22385. 2  | 1. 02594   | coding    |
| MSTRG. 22386. 2  | 1. 19498   | coding    |
| MSTRG. 22397. 2  | 0. 404285  | coding    |
| MSTRG. 22397. 3  | 0. 337312  | coding    |
| MSTRG. 22397. 4  | 0. 14145   | coding    |
| MSTRG. 22398. 1  | 1. 19219   | coding    |
| MSTRG. 22399. 1  | 1. 90161   | coding    |
| MSTRG. 22399. 2  | 1. 85946   | coding    |
| MSTRG. 22400. 1  | -0. 73446  | noncoding |
| MSTRG. 22402. 2  | 0. 220493  | coding    |
| MSTRG. 22402. 3  | 0. 284661  | coding    |
| MSTRG. 22403. 1  | 0. 354224  | coding    |
| MSTRG. 22406. 2  | -0. 031035 | noncoding |
| MSTRG. 22406. 5  | 0. 358374  | coding    |
| MSTRG. 22411. 2  | 1. 45083   | coding    |
| MSTRG. 22411. 1  | 0. 526287  | coding    |
| MSTRG. 22407. 1  | 0. 812003  | coding    |
| MSTRG. 22407. 2  | 0. 783671  | coding    |
| MSTRG. 22408. 1  | 0. 030256  | coding    |
| MSTRG. 22419. 1  | -0. 625968 | noncoding |
| MSTRG. 22420. 1  | -1. 43007  | noncoding |
| MSTRG. 22417. 1  | -1. 97183  | noncoding |
| MSTRG. 22417. 2  | -0. 988948 | noncoding |
| MSTRG. 22426. 1  | -2. 93788  | noncoding |
| MSTRG. 22428. 2  | 2. 61295   | coding    |
| MSTRG. 22430. 2  | 1. 7839    | coding    |
| MSTRG. 22435. 2  | 1. 5749    | coding    |
| MSTRG. 22431. 1  | 2. 01253   | coding    |
| MSTRG. 22444. 7  | 1. 49942   | coding    |
| MSTRG. 22444. 5  | 1. 37517   | coding    |
| MSTRG. 22449. 1  | 2. 42279   | coding    |
| MSTRG. 22444. 10 | -1. 96716  | noncoding |
| MSTRG. 22449. 3  | 2. 16186   | coding    |
| MSTRG. 22449. 4  | 2. 12414   | coding    |
| MSTRG. 22449. 5  | 2. 12083   | coding    |
| MSTRG. 22449. 9  | 2. 14374   | coding    |
| MSTRG. 22449. 10 | 2. 27025   | coding    |
| MSTRG. 22451. 3  | 1. 11919   | coding    |
| MSTRG. 22451. 8  | 1. 28828   | coding    |
| MSTRG. 22451. 5  | 1. 33528   | coding    |
| MSTRG. 22451. 9  | 1. 35771   | coding    |
| MSTRG. 22451. 13 | -0. 290325 | noncoding |
| MSTRG. 22451. 14 | 1. 86058   | coding    |
| MSTRG. 22451. 11 | 1. 84968   | coding    |
| MSTRG. 22451. 12 | 1. 85237   | coding    |
| MSTRG. 22442. 1  | -0. 744836 | noncoding |
| MSTRG. 22459. 3  | 0. 490335  | coding    |
| MSTRG. 22459. 1  | 0. 518178  | coding    |
| MSTRG. 22459. 4  | 0. 409076  | coding    |

|                  |            |           |
|------------------|------------|-----------|
| MSTRG. 22459. 5  | 0. 309062  | coding    |
| MSTRG. 22459. 6  | 1. 60329   | coding    |
| MSTRG. 22460. 1  | 1. 06673   | coding    |
| MSTRG. 22460. 2  | -0. 3825   | noncoding |
| MSTRG. 22461. 1  | 0. 031855  | coding    |
| MSTRG. 22461. 2  | 0. 490139  | coding    |
| MSTRG. 22461. 4  | -0. 632322 | noncoding |
| MSTRG. 22461. 5  | -0. 217609 | noncoding |
| MSTRG. 22461. 6  | 0. 433258  | coding    |
| MSTRG. 22454. 1  | 1. 18569   | coding    |
| MSTRG. 22454. 2  | 1. 23849   | coding    |
| MSTRG. 22455. 3  | 1. 82814   | coding    |
| MSTRG. 22464. 1  | 0. 374345  | coding    |
| MSTRG. 22465. 1  | -0. 681173 | noncoding |
| MSTRG. 22466. 1  | 0. 759031  | coding    |
| MSTRG. 22478. 3  | 2. 76348   | coding    |
| MSTRG. 22478. 2  | 1. 84832   | coding    |
| MSTRG. 22478. 4  | 2. 58065   | coding    |
| MSTRG. 22478. 5  | 1. 84438   | coding    |
| MSTRG. 22478. 7  | 1. 79821   | coding    |
| MSTRG. 22478. 6  | 1. 95828   | coding    |
| MSTRG. 22478. 10 | 2. 53749   | coding    |
| MSTRG. 22478. 11 | 2. 68551   | coding    |
| MSTRG. 22480. 1  | -0. 152161 | noncoding |
| MSTRG. 22482. 1  | -2. 13115  | noncoding |
| MSTRG. 22490. 1  | 1. 3892    | coding    |
| MSTRG. 22490. 2  | -0. 356362 | noncoding |
| MSTRG. 22490. 3  | 0. 458381  | coding    |
| MSTRG. 22490. 4  | 0. 010197  | coding    |
| MSTRG. 22490. 5  | 0. 950601  | coding    |
| MSTRG. 22490. 6  | 0. 811712  | coding    |
| MSTRG. 22490. 7  | 1. 54192   | coding    |
| MSTRG. 22490. 9  | 0. 555622  | coding    |
| MSTRG. 22468. 1  | -1. 11173  | noncoding |
| MSTRG. 22469. 1  | -0. 748755 | noncoding |
| MSTRG. 22476. 1  | -1. 54342  | noncoding |
| MSTRG. 22477. 1  | -0. 597769 | noncoding |
| MSTRG. 22519. 1  | 1. 44936   | coding    |
| MSTRG. 22521. 1  | -1. 7184   | noncoding |
| MSTRG. 22517. 1  | 0. 069449  | coding    |
| MSTRG. 22517. 2  | 1. 06613   | coding    |
| MSTRG. 22517. 3  | 0. 500689  | coding    |
| MSTRG. 22524. 1  | -2. 25825  | noncoding |
| MSTRG. 22526. 1  | 2. 33292   | coding    |
| MSTRG. 22539. 1  | -1. 23382  | noncoding |
| MSTRG. 22542. 2  | 2. 41139   | coding    |
| MSTRG. 22544. 1  | -1. 59003  | noncoding |
| MSTRG. 22544. 2  | -2. 16759  | noncoding |
| MSTRG. 22528. 1  | -2. 39077  | noncoding |
| MSTRG. 22530. 1  | -1. 51645  | noncoding |
| MSTRG. 22549. 1  | -0. 636674 | noncoding |
| MSTRG. 22549. 2  | -0. 876256 | noncoding |
| MSTRG. 22551. 3  | -1. 17992  | noncoding |
| MSTRG. 22551. 2  | -0. 686583 | noncoding |

|                |           |           |
|----------------|-----------|-----------|
| MSTRG. 22551.4 | -1.28232  | noncoding |
| MSTRG. 22551.5 | -1.63231  | noncoding |
| MSTRG. 22552.2 | 1.05676   | coding    |
| MSTRG. 22550.2 | 1.46759   | coding    |
| MSTRG. 22553.3 | 0.205025  | coding    |
| MSTRG. 22563.1 | 2.26947   | coding    |
| MSTRG. 22563.3 | -0.207927 | noncoding |
| MSTRG. 22564.3 | 1.23849   | coding    |
| MSTRG. 22572.1 | 2.38321   | coding    |
| MSTRG. 22574.1 | -0.523934 | noncoding |
| MSTRG. 22572.2 | 2.49596   | coding    |
| MSTRG. 22572.3 | 2.58551   | coding    |
| MSTRG. 22576.1 | -0.135668 | noncoding |
| MSTRG. 22580.1 | -1.39129  | noncoding |
| MSTRG. 22579.3 | -1.70913  | noncoding |
| MSTRG. 22579.4 | -1.65486  | noncoding |
| MSTRG. 22583.2 | -0.121176 | noncoding |
| MSTRG. 22583.5 | -0.166655 | noncoding |
| MSTRG. 22592.2 | 0.884222  | coding    |
| MSTRG. 22592.3 | 0.889227  | coding    |
| MSTRG. 22592.4 | 0.545101  | coding    |
| MSTRG. 22585.2 | 0.287708  | coding    |
| MSTRG. 22585.1 | -0.103775 | noncoding |
| MSTRG. 22593.4 | 2.52135   | coding    |
| MSTRG. 22598.2 | 1.39558   | coding    |
| MSTRG. 22598.4 | 1.40624   | coding    |
| MSTRG. 22599.1 | 0.781881  | coding    |
| MSTRG. 22599.2 | 0.572312  | coding    |
| MSTRG. 22599.3 | 0.586047  | coding    |
| MSTRG. 22599.4 | -1.17746  | noncoding |
| MSTRG. 22599.5 | 0.175669  | coding    |
| MSTRG. 22605.1 | -0.381521 | noncoding |
| MSTRG. 22607.3 | 0.606054  | coding    |
| MSTRG. 22609.1 | 0.465611  | coding    |
| MSTRG. 22608.2 | 2.14126   | coding    |
| MSTRG. 22610.1 | -0.576499 | noncoding |
| MSTRG. 22610.2 | -0.066479 | noncoding |
| MSTRG. 22611.1 | -0.456652 | noncoding |
| MSTRG. 22612.1 | -0.783769 | noncoding |
| MSTRG. 22608.4 | 1.71529   | coding    |
| MSTRG. 22617.3 | 1.62834   | coding    |
| MSTRG. 22617.1 | 1.67779   | coding    |
| MSTRG. 22617.4 | 1.58011   | coding    |
| MSTRG. 22618.1 | -1.49117  | noncoding |
| MSTRG. 22627.2 | 0.78949   | coding    |
| MSTRG. 22627.3 | 2.48277   | coding    |
| MSTRG. 22627.4 | 2.57351   | coding    |
| MSTRG. 22627.5 | 2.50985   | coding    |
| MSTRG. 22627.6 | 2.31398   | coding    |
| MSTRG. 22627.7 | 2.47108   | coding    |
| MSTRG. 22627.8 | 2.50703   | coding    |
| MSTRG. 22621.2 | -0.701706 | noncoding |
| MSTRG. 22624.2 | 2.77249   | coding    |
| MSTRG. 22633.4 | 0.103997  | coding    |

|                 |            |           |
|-----------------|------------|-----------|
| MSTRG. 22634. 3 | -0. 560985 | noncoding |
| MSTRG. 22644. 1 | 0. 474216  | coding    |
| MSTRG. 22644. 4 | -0. 711635 | noncoding |
| MSTRG. 22644. 5 | -0. 559947 | noncoding |
| MSTRG. 22644. 3 | -0. 123836 | noncoding |
| MSTRG. 22646. 1 | 1. 25883   | coding    |
| MSTRG. 22646. 2 | 1. 74699   | coding    |
| MSTRG. 22646. 4 | 0. 624571  | coding    |
| MSTRG. 22650. 1 | -1. 05186  | noncoding |
| MSTRG. 22650. 5 | -0. 507894 | noncoding |
| MSTRG. 22650. 6 | -0. 566922 | noncoding |
| MSTRG. 22650. 3 | -0. 499635 | noncoding |
| MSTRG. 22650. 4 | -0. 402341 | noncoding |
| MSTRG. 22650. 7 | -0. 452026 | noncoding |
| MSTRG. 22639. 2 | 1. 43933   | coding    |
| MSTRG. 22651. 3 | 1. 62386   | coding    |
| MSTRG. 22651. 4 | 1. 40218   | coding    |
| MSTRG. 22651. 5 | 1. 22911   | coding    |
| MSTRG. 22651. 6 | 1. 30116   | coding    |
| MSTRG. 22651. 7 | 1. 32895   | coding    |
| MSTRG. 22654. 1 | -0. 649758 | noncoding |
| MSTRG. 22656. 1 | -0. 939677 | noncoding |
| MSTRG. 22660. 2 | -0. 948476 | noncoding |
| MSTRG. 22668. 2 | 1. 55233   | coding    |
| MSTRG. 22664. 1 | 1. 97435   | coding    |
| MSTRG. 22683. 4 | 1. 19183   | coding    |
| MSTRG. 22684. 1 | -0. 563961 | noncoding |
| MSTRG. 22686. 2 | 2. 40165   | coding    |
| MSTRG. 22686. 3 | 2. 28437   | coding    |
| MSTRG. 22689. 1 | 0. 20835   | coding    |
| MSTRG. 22679. 1 | -0. 37078  | noncoding |
| MSTRG. 22703. 3 | 0. 204606  | coding    |
| MSTRG. 22703. 2 | 0. 42859   | coding    |
| MSTRG. 22709. 2 | 1. 51901   | coding    |
| MSTRG. 22713. 1 | 1. 06822   | coding    |
| MSTRG. 22713. 5 | 2. 45258   | coding    |
| MSTRG. 22713. 4 | 2. 48311   | coding    |
| MSTRG. 22714. 1 | -0. 141326 | noncoding |
| MSTRG. 22694. 2 | 0. 664747  | coding    |
| MSTRG. 22718. 1 | 0. 43894   | coding    |
| MSTRG. 22718. 2 | 1. 03288   | coding    |
| MSTRG. 22718. 3 | 0. 850265  | coding    |
| MSTRG. 22718. 4 | 1. 61526   | coding    |
| MSTRG. 22721. 1 | 0. 613951  | coding    |
| MSTRG. 22722. 1 | 0. 1099    | coding    |
| MSTRG. 22725. 1 | -0. 599151 | noncoding |
| MSTRG. 22731. 2 | 2. 01121   | coding    |
| MSTRG. 22733. 1 | 0. 061989  | coding    |
| MSTRG. 22733. 2 | -0. 040394 | noncoding |
| MSTRG. 22737. 2 | 1. 0176    | coding    |
| MSTRG. 22739. 1 | -1. 53153  | noncoding |
| MSTRG. 22740. 1 | 0. 23634   | coding    |
| MSTRG. 22740. 2 | 1. 14933   | coding    |
| MSTRG. 22740. 4 | 0. 276954  | coding    |



|                 |            |           |
|-----------------|------------|-----------|
| MSTRG. 22742. 1 | 1. 70174   | coding    |
| MSTRG. 22742. 2 | 0. 518044  | coding    |
| MSTRG. 22744. 2 | 2. 31687   | coding    |
| MSTRG. 22744. 3 | 2. 19671   | coding    |
| MSTRG. 22744. 5 | 1. 15738   | coding    |
| MSTRG. 22744. 4 | 2. 34144   | coding    |
| MSTRG. 22744. 6 | 2. 30762   | coding    |
| MSTRG. 22744. 8 | 0. 012812  | coding    |
| MSTRG. 22746. 1 | 2. 67221   | coding    |
| MSTRG. 22747. 1 | 0. 473457  | coding    |
| MSTRG. 22747. 3 | 1. 31303   | coding    |
| MSTRG. 22747. 4 | 1. 67756   | coding    |
| MSTRG. 22749. 4 | 0. 975775  | coding    |
| MSTRG. 22750. 5 | 0. 530356  | coding    |
| MSTRG. 22755. 1 | -0. 737156 | noncoding |
| MSTRG. 22763. 2 | 2. 6336    | coding    |
| MSTRG. 22763. 4 | 2. 73155   | coding    |
| MSTRG. 22763. 5 | 2. 53211   | coding    |
| MSTRG. 22763. 6 | 2. 54684   | coding    |
| MSTRG. 22764. 1 | 0. 834793  | coding    |
| MSTRG. 22764. 3 | -0. 047062 | noncoding |
| MSTRG. 22770. 2 | 1. 20223   | coding    |
| MSTRG. 22774. 1 | -1. 93563  | noncoding |
| MSTRG. 22776. 1 | -1. 5581   | noncoding |
| MSTRG. 22779. 1 | 0. 06684   | coding    |
| MSTRG. 22780. 1 | -1. 38136  | noncoding |
| MSTRG. 22790. 3 | 2. 84556   | coding    |
| MSTRG. 22790. 4 | 2. 57681   | coding    |
| MSTRG. 22790. 5 | 2. 45613   | coding    |
| MSTRG. 22793. 1 | -1. 50232  | noncoding |
| MSTRG. 22798. 3 | 2. 59588   | coding    |
| MSTRG. 22800. 5 | 1. 06543   | coding    |
| MSTRG. 22800. 3 | 1. 2782    | coding    |
| MSTRG. 22784. 1 | 1. 36274   | coding    |
| MSTRG. 22785. 4 | 2. 15518   | coding    |
| MSTRG. 22785. 5 | 0. 698841  | coding    |
| MSTRG. 22785. 6 | 1. 02387   | coding    |
| MSTRG. 22786. 1 | -0. 809155 | noncoding |
| MSTRG. 22787. 1 | 0. 705194  | coding    |
| MSTRG. 22789. 2 | -0. 292709 | noncoding |
| MSTRG. 22803. 1 | -2. 3711   | noncoding |
| MSTRG. 22804. 1 | 1. 04917   | coding    |
| MSTRG. 22804. 3 | 0. 788662  | coding    |
| MSTRG. 22804. 4 | 0. 76827   | coding    |
| MSTRG. 22806. 2 | -0. 787182 | noncoding |
| MSTRG. 22811. 1 | 2. 21929   | coding    |
| MSTRG. 22812. 3 | 1. 0997    | coding    |
| MSTRG. 22813. 1 | -0. 096209 | noncoding |
| MSTRG. 22814. 2 | 1. 52537   | coding    |
| MSTRG. 22818. 2 | 2. 07667   | coding    |
| MSTRG. 22819. 2 | 1. 20895   | coding    |
| MSTRG. 22819. 1 | 1. 23451   | coding    |
| MSTRG. 22822. 2 | 0. 71326   | coding    |
| MSTRG. 22822. 3 | -0. 714846 | noncoding |

|                  |            |           |
|------------------|------------|-----------|
| MSTRG. 22825. 1  | 0. 787523  | coding    |
| MSTRG. 22825. 7  | 0. 347831  | coding    |
| MSTRG. 22825. 5  | 0. 294542  | coding    |
| MSTRG. 22825. 6  | 0. 714869  | coding    |
| MSTRG. 22827. 1  | -1. 07059  | noncoding |
| MSTRG. 22829. 3  | 0. 951709  | coding    |
| MSTRG. 22829. 4  | 0. 977512  | coding    |
| MSTRG. 22829. 2  | 1. 52816   | coding    |
| MSTRG. 22824. 1  | 0. 610629  | coding    |
| MSTRG. 22832. 5  | 1. 06259   | coding    |
| MSTRG. 22832. 6  | 1. 09425   | coding    |
| MSTRG. 22832. 4  | 1. 41223   | coding    |
| MSTRG. 22833. 2  | -0. 029935 | noncoding |
| MSTRG. 22833. 3  | 0. 296418  | coding    |
| MSTRG. 22841. 2  | 1. 57567   | coding    |
| MSTRG. 22841. 3  | 1. 38427   | coding    |
| MSTRG. 22842. 8  | 1. 24395   | coding    |
| MSTRG. 22842. 9  | 1. 11692   | coding    |
| MSTRG. 22842. 10 | 0. 887537  | coding    |
| MSTRG. 22842. 12 | 1. 09331   | coding    |
| MSTRG. 22842. 13 | 1. 12603   | coding    |
| MSTRG. 22835. 1  | 1. 28487   | coding    |
| MSTRG. 22835. 2  | 1. 60853   | coding    |
| MSTRG. 22836. 1  | -0. 487792 | noncoding |
| MSTRG. 22838. 4  | 0. 344308  | coding    |
| MSTRG. 22838. 5  | 0. 210531  | coding    |
| MSTRG. 22838. 3  | 0. 739102  | coding    |
| MSTRG. 22838. 2  | 0. 658788  | coding    |
| MSTRG. 22845. 2  | 0. 602579  | coding    |
| MSTRG. 22847. 3  | 0. 889094  | coding    |
| MSTRG. 22857. 1  | 0. 285393  | coding    |
| MSTRG. 22857. 2  | 1. 47959   | coding    |
| MSTRG. 22858. 3  | 1. 84457   | coding    |
| MSTRG. 22858. 5  | 1. 83302   | coding    |
| MSTRG. 22858. 6  | 1. 82427   | coding    |
| MSTRG. 22858. 7  | 1. 84069   | coding    |
| MSTRG. 22858. 8  | 1. 84637   | coding    |
| MSTRG. 22858. 10 | 1. 83111   | coding    |
| MSTRG. 22858. 4  | 1. 84843   | coding    |
| MSTRG. 22858. 9  | 1. 84471   | coding    |
| MSTRG. 22867. 1  | 2. 67528   | coding    |
| MSTRG. 22871. 1  | -0. 990994 | noncoding |
| MSTRG. 22871. 2  | -1. 52154  | noncoding |
| MSTRG. 22881. 2  | 2. 22442   | coding    |
| MSTRG. 22881. 3  | 2. 13216   | coding    |
| MSTRG. 22892. 2  | 1. 17024   | coding    |
| MSTRG. 22892. 4  | 1. 18621   | coding    |
| MSTRG. 22892. 5  | 0. 177055  | coding    |
| MSTRG. 22893. 1  | -1. 68682  | noncoding |
| MSTRG. 22895. 2  | -0. 110631 | noncoding |
| MSTRG. 22896. 1  | 0. 652432  | coding    |
| MSTRG. 22896. 4  | 1. 43764   | coding    |
| MSTRG. 22898. 2  | 1. 85291   | coding    |
| MSTRG. 22899. 1  | 1. 28517   | coding    |

|                |           |           |
|----------------|-----------|-----------|
| MSTRG. 22909.2 | 0.312688  | coding    |
| MSTRG. 22911.3 | 2.04159   | coding    |
| MSTRG. 22912.1 | -0.942286 | noncoding |
| MSTRG. 22913.2 | 1.50157   | coding    |
| MSTRG. 22914.3 | 1.31138   | coding    |
| MSTRG. 22919.1 | 2.57453   | coding    |
| MSTRG. 22921.1 | -3.02532  | noncoding |
| MSTRG. 22922.1 | 1.02707   | coding    |
| MSTRG. 22922.3 | 0.326158  | coding    |
| MSTRG. 22924.1 | 1.56972   | coding    |
| MSTRG. 22922.6 | -0.095975 | noncoding |
| MSTRG. 22924.3 | 0.306577  | coding    |
| MSTRG. 22924.2 | 1.22169   | coding    |
| MSTRG. 22928.2 | 1.52568   | coding    |
| MSTRG. 22931.5 | 1.23136   | coding    |
| MSTRG. 22931.6 | 1.68354   | coding    |
| MSTRG. 22933.1 | 0.435557  | coding    |
| MSTRG. 22935.1 | 0.939383  | coding    |
| MSTRG. 22936.1 | 0.166725  | coding    |
| MSTRG. 22937.2 | 0.448918  | coding    |
| MSTRG. 22937.3 | 0.581243  | coding    |
| MSTRG. 22941.4 | 1.83358   | coding    |
| MSTRG. 22943.1 | 0.587042  | coding    |
| MSTRG. 22944.2 | 0.549449  | coding    |
| MSTRG. 22925.3 | 1.26594   | coding    |
| MSTRG. 22946.1 | 1.59392   | coding    |
| MSTRG. 22946.4 | 0.65477   | coding    |
| MSTRG. 22947.2 | 1.6256    | coding    |
| MSTRG. 22948.3 | 2.78551   | coding    |
| MSTRG. 22948.4 | 2.93773   | coding    |
| MSTRG. 22948.2 | 2.58611   | coding    |
| MSTRG. 22948.5 | 2.47439   | coding    |
| MSTRG. 22951.1 | 2.00112   | coding    |
| MSTRG. 22951.2 | 2.08787   | coding    |
| MSTRG. 22953.1 | 1.82102   | coding    |
| MSTRG. 22953.2 | 2.26944   | coding    |
| MSTRG. 22953.8 | 1.56757   | coding    |
| MSTRG. 22953.4 | 2.20078   | coding    |
| MSTRG. 22953.5 | 1.523     | coding    |
| MSTRG. 22953.6 | 2.18754   | coding    |
| MSTRG. 22953.7 | 1.91389   | coding    |
| MSTRG. 22953.3 | 2.80237   | coding    |
| MSTRG. 22954.1 | -0.932151 | noncoding |
| MSTRG. 22955.1 | -2.58717  | noncoding |
| MSTRG. 22965.3 | 0.053112  | coding    |
| MSTRG. 22965.5 | 0.956032  | coding    |
| MSTRG. 22965.4 | 1.76572   | coding    |
| MSTRG. 22965.6 | 1.78416   | coding    |
| MSTRG. 22965.8 | 0.238909  | coding    |
| MSTRG. 22976.4 | -0.217571 | noncoding |
| MSTRG. 22977.2 | 1.52591   | coding    |
| MSTRG. 22979.2 | 1.50678   | coding    |
| MSTRG. 22979.3 | 1.25375   | coding    |
| MSTRG. 22983.2 | 2.23762   | coding    |

|                  |           |           |
|------------------|-----------|-----------|
| MSTRG. 22984. 5  | -0.108899 | noncoding |
| MSTRG. 22984. 1  | 0.297095  | coding    |
| MSTRG. 22984. 3  | 1.12856   | coding    |
| MSTRG. 22984. 4  | 0.815446  | coding    |
| MSTRG. 22985. 2  | -0.545948 | noncoding |
| MSTRG. 22986. 3  | 1.78511   | coding    |
| MSTRG. 22986. 4  | 1.00304   | coding    |
| MSTRG. 22986. 5  | 0.758186  | coding    |
| MSTRG. 22966. 6  | 1.42649   | coding    |
| MSTRG. 22966. 2  | 1.20344   | coding    |
| MSTRG. 22966. 3  | 1.19504   | coding    |
| MSTRG. 22966. 4  | 1.23509   | coding    |
| MSTRG. 22966. 5  | 0.388144  | coding    |
| MSTRG. 22967. 1  | 0.062404  | coding    |
| MSTRG. 22968. 1  | 0.249061  | coding    |
| MSTRG. 22967. 2  | 0.138895  | coding    |
| MSTRG. 22966. 7  | 0.821653  | coding    |
| MSTRG. 22966. 8  | 1.05173   | coding    |
| MSTRG. 22966. 9  | 1.57269   | coding    |
| MSTRG. 22966. 10 | 1.22339   | coding    |
| MSTRG. 22972. 1  | 0.876941  | coding    |
| MSTRG. 23003. 1  | -1.79945  | noncoding |
| MSTRG. 23003. 2  | -2.14208  | noncoding |
| MSTRG. 23003. 3  | -1.87131  | noncoding |
| MSTRG. 23015. 1  | 3.93899   | coding    |
| MSTRG. 23015. 2  | 4.0351    | coding    |
| MSTRG. 23016. 1  | -0.791713 | noncoding |
| MSTRG. 23015. 3  | 4.07257   | coding    |
| MSTRG. 23017. 1  | 0.073344  | coding    |
| MSTRG. 23018. 1  | -0.849098 | noncoding |
| MSTRG. 23006. 1  | -2.22777  | noncoding |
| MSTRG. 23007. 1  | 1.68916   | coding    |
| MSTRG. 23007. 3  | 1.56573   | coding    |
| MSTRG. 23009. 1  | 1.38292   | coding    |
| MSTRG. 23009. 2  | 1.19993   | coding    |
| MSTRG. 23009. 3  | 1.12421   | coding    |
| MSTRG. 23049. 1  | -0.533605 | noncoding |
| MSTRG. 23050. 1  | -1.34965  | noncoding |
| MSTRG. 23048. 5  | 2.13822   | coding    |
| MSTRG. 23048. 4  | 2.13578   | coding    |
| MSTRG. 23048. 6  | 2.0906    | coding    |
| MSTRG. 23052. 2  | 1.04331   | coding    |
| MSTRG. 23055. 1  | 1.40921   | coding    |
| MSTRG. 23055. 5  | 1.46657   | coding    |
| MSTRG. 23054. 3  | -0.001014 | noncoding |
| MSTRG. 23057. 1  | -1.18441  | noncoding |
| MSTRG. 23058. 1  | -0.481409 | noncoding |
| MSTRG. 23061. 1  | 0.504713  | coding    |
| MSTRG. 23061. 2  | -1.11279  | noncoding |
| MSTRG. 23071. 1  | 0.703761  | coding    |
| MSTRG. 23080. 2  | 0.309105  | coding    |
| MSTRG. 23080. 1  | -1.36985  | noncoding |
| MSTRG. 23082. 1  | 2.89154   | coding    |
| MSTRG. 23082. 2  | 0.763987  | coding    |

|                 |            |           |
|-----------------|------------|-----------|
| MSTRG. 23082. 3 | 2. 94173   | coding    |
| MSTRG. 23082. 4 | 2. 93395   | coding    |
| MSTRG. 23084. 1 | -0. 766939 | noncoding |
| MSTRG. 23072. 2 | 0. 439414  | coding    |
| MSTRG. 23074. 1 | 2. 065     | coding    |
| MSTRG. 23074. 2 | 2. 19248   | coding    |
| MSTRG. 23075. 1 | -0. 878101 | noncoding |
| MSTRG. 23076. 1 | -0. 244248 | noncoding |
| MSTRG. 23087. 3 | 1. 3627    | coding    |
| MSTRG. 23079. 2 | 3. 68884   | coding    |
| MSTRG. 23089. 2 | -0. 915195 | noncoding |
| MSTRG. 23089. 1 | -1. 78588  | noncoding |
| MSTRG. 23094. 2 | 1. 15595   | coding    |
| MSTRG. 23094. 4 | 0. 604591  | coding    |
| MSTRG. 23094. 5 | 0. 703517  | coding    |
| MSTRG. 23094. 6 | 0. 519581  | coding    |
| MSTRG. 23101. 1 | 1. 73596   | coding    |
| MSTRG. 23101. 2 | 1. 67982   | coding    |
| MSTRG. 23106. 3 | 1. 11648   | coding    |
| MSTRG. 23106. 4 | 0. 779695  | coding    |
| MSTRG. 23106. 5 | 1. 25292   | coding    |
| MSTRG. 23108. 1 | 1. 89766   | coding    |
| MSTRG. 23105. 2 | 1. 60262   | coding    |
| MSTRG. 23110. 2 | 2. 46971   | coding    |
| MSTRG. 23110. 3 | 2. 19819   | coding    |
| MSTRG. 23122. 1 | 1. 65615   | coding    |
| MSTRG. 23122. 2 | 1. 60213   | coding    |
| MSTRG. 23122. 3 | 1. 85785   | coding    |
| MSTRG. 23127. 1 | -1. 99483  | noncoding |
| MSTRG. 23127. 2 | -0. 506667 | noncoding |
| MSTRG. 23128. 1 | -1. 89249  | noncoding |
| MSTRG. 23130. 1 | -0. 380785 | noncoding |
| MSTRG. 23134. 1 | -0. 068086 | noncoding |
| MSTRG. 23139. 2 | 1. 16738   | coding    |
| MSTRG. 23139. 4 | -0. 477525 | noncoding |
| MSTRG. 23139. 5 | -0. 497583 | noncoding |
| MSTRG. 23139. 6 | -0. 526921 | noncoding |
| MSTRG. 23139. 7 | -0. 756454 | noncoding |
| MSTRG. 23142. 2 | -0. 190124 | noncoding |
| MSTRG. 23142. 1 | -0. 249636 | noncoding |
| MSTRG. 23145. 1 | -0. 097091 | noncoding |
| MSTRG. 23145. 2 | -0. 406004 | noncoding |
| MSTRG. 23146. 1 | 0. 243495  | coding    |
| MSTRG. 23153. 2 | 2. 24916   | coding    |
| MSTRG. 23153. 3 | 2. 13392   | coding    |
| MSTRG. 23150. 2 | 2. 29592   | coding    |
| MSTRG. 23151. 1 | -0. 338488 | noncoding |
| MSTRG. 23154. 1 | -0. 794104 | noncoding |
| MSTRG. 23159. 3 | 0. 492749  | coding    |
| MSTRG. 23160. 1 | 2. 1844    | coding    |
| MSTRG. 23158. 1 | -0. 772086 | noncoding |
| MSTRG. 23158. 2 | -0. 522594 | noncoding |
| MSTRG. 23166. 1 | -1. 09576  | noncoding |
| MSTRG. 23169. 1 | -0. 280958 | noncoding |

|                |           |           |
|----------------|-----------|-----------|
| MSTRG. 23173.1 | -2.01933  | noncoding |
| MSTRG. 23175.1 | -0.322351 | noncoding |
| MSTRG. 23175.2 | -0.767175 | noncoding |
| MSTRG. 23174.1 | -1.54431  | noncoding |
| MSTRG. 23178.1 | 1.51157   | coding    |
| MSTRG. 23182.1 | 1.86252   | coding    |
| MSTRG. 23187.1 | -0.791095 | noncoding |
| MSTRG. 23188.1 | -0.069035 | noncoding |
| MSTRG. 23188.2 | -0.287999 | noncoding |
| MSTRG. 23188.4 | -0.339499 | noncoding |
| MSTRG. 23188.3 | -0.252269 | noncoding |
| MSTRG. 23189.2 | 2.54974   | coding    |
| MSTRG. 23191.3 | 0.107916  | coding    |
| MSTRG. 23191.4 | 0.094441  | coding    |
| MSTRG. 23191.2 | 0.111278  | coding    |
| MSTRG. 23192.4 | -0.573582 | noncoding |
| MSTRG. 23186.2 | 0.443179  | coding    |
| MSTRG. 23194.1 | 2.04933   | coding    |
| MSTRG. 23194.2 | 2.05027   | coding    |
| MSTRG. 23195.3 | 0.713398  | coding    |
| MSTRG. 23195.4 | 0.682143  | coding    |
| MSTRG. 23195.2 | 0.71713   | coding    |
| MSTRG. 23195.1 | 0.58459   | coding    |
| MSTRG. 23196.1 | -0.914637 | noncoding |
| MSTRG. 23193.1 | 1.78501   | coding    |
| MSTRG. 23197.2 | -1.09875  | noncoding |
| MSTRG. 23202.1 | 0.399428  | coding    |
| MSTRG. 23204.3 | 2.22124   | coding    |
| MSTRG. 23201.2 | 0.660078  | coding    |
| MSTRG. 23207.1 | 0.561663  | coding    |
| MSTRG. 23207.4 | 0.369441  | coding    |
| MSTRG. 23212.1 | -0.203319 | noncoding |
| MSTRG. 23213.1 | 0.58341   | coding    |
| MSTRG. 23221.3 | 1.56791   | coding    |
| MSTRG. 23221.2 | 0.777013  | coding    |
| MSTRG. 23222.1 | -1.41845  | noncoding |
| MSTRG. 23223.1 | 1.4807    | coding    |
| MSTRG. 23223.2 | 0.970625  | coding    |
| MSTRG. 23223.3 | 1.26431   | coding    |
| MSTRG. 23223.4 | 0.788725  | coding    |
| MSTRG. 23224.1 | -0.331175 | noncoding |
| MSTRG. 23234.1 | -0.408351 | noncoding |
| MSTRG. 23237.1 | 1.53431   | coding    |
| MSTRG. 23237.3 | 1.50499   | coding    |
| MSTRG. 23239.1 | 1.25338   | coding    |
| MSTRG. 23241.1 | 0.604473  | coding    |
| MSTRG. 23253.1 | 0.232058  | coding    |
| MSTRG. 23255.2 | 2.15091   | coding    |
| MSTRG. 23255.4 | 2.63529   | coding    |
| MSTRG. 23255.5 | 2.29994   | coding    |
| MSTRG. 23255.6 | 2.67642   | coding    |
| MSTRG. 23257.1 | -0.324976 | noncoding |
| MSTRG. 23255.7 | 1.949     | coding    |
| MSTRG. 23255.8 | 1.18396   | coding    |

|                  |            |           |
|------------------|------------|-----------|
| MSTRG. 23265. 1  | 2. 28607   | coding    |
| MSTRG. 23265. 2  | 2. 20801   | coding    |
| MSTRG. 23265. 3  | 0. 605527  | coding    |
| MSTRG. 23265. 12 | 2. 04433   | coding    |
| MSTRG. 23265. 11 | 1. 92685   | coding    |
| MSTRG. 23265. 13 | 2. 23453   | coding    |
| MSTRG. 23265. 7  | 2. 26085   | coding    |
| MSTRG. 23265. 15 | 0. 477002  | coding    |
| MSTRG. 23262. 1  | 0. 523386  | coding    |
| MSTRG. 23264. 1  | 0. 837923  | coding    |
| MSTRG. 23258. 1  | -1. 68137  | noncoding |
| MSTRG. 23259. 1  | -1. 2279   | noncoding |
| MSTRG. 23268. 1  | 2. 07167   | coding    |
| MSTRG. 23272. 1  | -0. 913502 | noncoding |
| MSTRG. 23272. 2  | -0. 768317 | noncoding |
| MSTRG. 23272. 3  | -0. 500534 | noncoding |
| MSTRG. 23272. 4  | -0. 494596 | noncoding |
| MSTRG. 23272. 5  | -1. 3324   | noncoding |
| MSTRG. 23271. 3  | 0. 619275  | coding    |
| MSTRG. 23273. 3  | 3. 24698   | coding    |
| MSTRG. 23275. 3  | 1. 19395   | coding    |
| MSTRG. 23280. 2  | 1. 76579   | coding    |
| MSTRG. 23284. 2  | 1. 09204   | coding    |
| MSTRG. 23285. 3  | 2. 16459   | coding    |
| MSTRG. 23285. 4  | 1. 99778   | coding    |
| MSTRG. 23285. 5  | 1. 86635   | coding    |
| MSTRG. 23285. 6  | 2. 01305   | coding    |
| MSTRG. 23285. 8  | 1. 48079   | coding    |
| MSTRG. 23279. 1  | -0. 621424 | noncoding |
| MSTRG. 23291. 2  | -0. 633665 | noncoding |
| MSTRG. 23291. 3  | -0. 860798 | noncoding |
| MSTRG. 23292. 3  | 1. 78785   | coding    |
| MSTRG. 23292. 4  | 1. 75291   | coding    |
| MSTRG. 23292. 5  | 1. 15737   | coding    |
| MSTRG. 23292. 6  | 1. 84266   | coding    |
| MSTRG. 23292. 8  | 1. 08342   | coding    |
| MSTRG. 23292. 9  | 1. 0639    | coding    |
| MSTRG. 23292. 10 | 1. 18937   | coding    |
| MSTRG. 23297. 4  | 2. 8903    | coding    |
| MSTRG. 23297. 3  | 3. 19023   | coding    |
| MSTRG. 23295. 1  | 0. 679255  | coding    |
| MSTRG. 23296. 2  | -0. 200581 | noncoding |
| MSTRG. 23296. 3  | -0. 55468  | noncoding |
| MSTRG. 23301. 1  | 0. 169202  | coding    |
| MSTRG. 23307. 1  | 1. 27725   | coding    |
| MSTRG. 23307. 2  | 2. 38893   | coding    |
| MSTRG. 23307. 3  | 1. 67578   | coding    |
| MSTRG. 23307. 7  | 2. 44377   | coding    |
| MSTRG. 23318. 4  | 1. 59594   | coding    |
| MSTRG. 23318. 6  | 1. 65313   | coding    |
| MSTRG. 23318. 7  | 1. 64935   | coding    |
| MSTRG. 23318. 8  | 1. 87529   | coding    |
| MSTRG. 23318. 9  | 1. 85455   | coding    |
| MSTRG. 23321. 3  | 0. 262942  | coding    |

|                  |            |           |
|------------------|------------|-----------|
| MSTRG. 23321. 2  | 0. 496249  | coding    |
| MSTRG. 23322. 1  | 0. 873327  | coding    |
| MSTRG. 23322. 4  | -0. 1596   | noncoding |
| MSTRG. 23322. 5  | -0. 33021  | noncoding |
| MSTRG. 23322. 3  | 0. 831218  | coding    |
| MSTRG. 23323. 3  | 1. 44583   | coding    |
| MSTRG. 23314. 1  | 2. 07895   | coding    |
| MSTRG. 23324. 2  | 1. 53838   | coding    |
| MSTRG. 23325. 1  | 1. 87395   | coding    |
| MSTRG. 23332. 2  | 1. 70258   | coding    |
| MSTRG. 23333. 1  | 0. 418408  | coding    |
| MSTRG. 23333. 3  | 0. 583267  | coding    |
| MSTRG. 23327. 1  | 0. 131676  | coding    |
| MSTRG. 23327. 2  | 0. 521981  | coding    |
| MSTRG. 23327. 3  | -0. 566938 | noncoding |
| MSTRG. 23327. 4  | 0. 495184  | coding    |
| MSTRG. 23339. 3  | 1. 78542   | coding    |
| MSTRG. 23347. 2  | 2. 20298   | coding    |
| MSTRG. 23347. 3  | 2. 09221   | coding    |
| MSTRG. 23348. 2  | 0. 770133  | coding    |
| MSTRG. 23348. 1  | 0. 358521  | coding    |
| MSTRG. 23349. 1  | 0. 700091  | coding    |
| MSTRG. 23349. 2  | 0. 307728  | coding    |
| MSTRG. 23349. 3  | 0. 425559  | coding    |
| MSTRG. 23349. 4  | 0. 436847  | coding    |
| MSTRG. 23349. 5  | 0. 506247  | coding    |
| MSTRG. 23350. 1  | 1. 80432   | coding    |
| MSTRG. 23350. 4  | 1. 92989   | coding    |
| MSTRG. 23355. 2  | 1. 9341    | coding    |
| MSTRG. 23357. 1  | 0. 810343  | coding    |
| MSTRG. 23360. 1  | -0. 449255 | noncoding |
| MSTRG. 23360. 2  | -0. 643491 | noncoding |
| MSTRG. 23360. 3  | -0. 397719 | noncoding |
| MSTRG. 23361. 1  | -1. 0804   | noncoding |
| MSTRG. 23352. 3  | 2. 1926    | coding    |
| MSTRG. 23352. 4  | 2. 01197   | coding    |
| MSTRG. 23352. 5  | 1. 79847   | coding    |
| MSTRG. 23365. 2  | 0. 010464  | coding    |
| MSTRG. 23369. 1  | -0. 307925 | noncoding |
| MSTRG. 23369. 9  | 0. 027417  | coding    |
| MSTRG. 23369. 10 | 0. 459016  | coding    |
| MSTRG. 23367. 1  | -2. 3421   | noncoding |
| MSTRG. 23367. 3  | -0. 215215 | noncoding |
| MSTRG. 23370. 3  | -0. 404899 | noncoding |
| MSTRG. 23373. 2  | -0. 169642 | noncoding |
| MSTRG. 23374. 3  | 2. 21872   | coding    |
| MSTRG. 23377. 2  | 1. 27002   | coding    |
| MSTRG. 23377. 3  | 1. 20559   | coding    |
| MSTRG. 23379. 1  | 0. 495462  | coding    |
| MSTRG. 23380. 1  | -0. 580558 | noncoding |
| MSTRG. 23379. 3  | 0. 197722  | coding    |
| MSTRG. 23380. 2  | -0. 485727 | noncoding |
| MSTRG. 23380. 3  | -0. 587554 | noncoding |
| MSTRG. 23380. 4  | -0. 540052 | noncoding |



|                |           |           |
|----------------|-----------|-----------|
| MSTRG. 23379.4 | 0.301263  | coding    |
| MSTRG. 23380.5 | -0.665887 | noncoding |
| MSTRG. 23380.6 | -0.646654 | noncoding |
| MSTRG. 23380.7 | -0.794991 | noncoding |
| MSTRG. 23380.8 | -0.645238 | noncoding |
| MSTRG. 23382.4 | 1.8765    | coding    |
| MSTRG. 23384.2 | 1.30779   | coding    |
| MSTRG. 23387.2 | 0.414571  | coding    |
| MSTRG. 23388.2 | 0.721913  | coding    |
| MSTRG. 23391.1 | 1.45929   | coding    |
| MSTRG. 23391.2 | 0.302871  | coding    |
| MSTRG. 23391.4 | 1.31881   | coding    |
| MSTRG. 23392.1 | 0.142688  | coding    |
| MSTRG. 23396.1 | 0.015187  | coding    |
| MSTRG. 23397.2 | 1.85801   | coding    |
| MSTRG. 23401.5 | 0.199918  | coding    |
| MSTRG. 23399.3 | 0.689455  | coding    |
| MSTRG. 23407.2 | 0.784133  | coding    |
| MSTRG. 23412.4 | 0.110635  | coding    |
| MSTRG. 23412.2 | 1.57685   | coding    |
| MSTRG. 23412.3 | 1.55411   | coding    |
| MSTRG. 23413.1 | -0.395113 | noncoding |
| MSTRG. 23406.1 | 1.05903   | coding    |
| MSTRG. 23414.1 | -0.662043 | noncoding |
| MSTRG. 23415.1 | 1.95181   | coding    |
| MSTRG. 23415.2 | 0.554374  | coding    |
| MSTRG. 23415.3 | 0.58477   | coding    |
| MSTRG. 23415.5 | -0.253675 | noncoding |
| MSTRG. 23415.4 | 1.3583    | coding    |
| MSTRG. 23416.1 | 0.776311  | coding    |
| MSTRG. 23416.2 | 1.46609   | coding    |
| MSTRG. 23420.1 | 2.47657   | coding    |
| MSTRG. 23430.2 | 0.396814  | coding    |
| MSTRG. 23433.1 | 0.267143  | coding    |
| MSTRG. 23433.2 | 1.14242   | coding    |
| MSTRG. 23435.1 | 0.120449  | coding    |
| MSTRG. 23443.5 | 1.94523   | coding    |
| MSTRG. 23443.6 | 2.45435   | coding    |
| MSTRG. 23443.7 | 1.59381   | coding    |
| MSTRG. 23438.3 | 0.197522  | coding    |
| MSTRG. 23451.2 | -0.295498 | noncoding |
| MSTRG. 23451.3 | -0.246043 | noncoding |
| MSTRG. 23454.2 | -0.735436 | noncoding |
| MSTRG. 23455.1 | -0.82335  | noncoding |
| MSTRG. 23456.1 | 1.47522   | coding    |
| MSTRG. 23461.2 | 1.41854   | coding    |
| MSTRG. 23462.1 | 1.42669   | coding    |
| MSTRG. 23457.2 | 0.416025  | coding    |
| MSTRG. 23463.2 | -0.687875 | noncoding |
| MSTRG. 23467.2 | 2.78127   | coding    |
| MSTRG. 23467.3 | 2.46949   | coding    |
| MSTRG. 23467.5 | 2.18853   | coding    |
| MSTRG. 23467.4 | 2.21558   | coding    |
| MSTRG. 23466.3 | 0.649778  | coding    |

|                  |            |           |
|------------------|------------|-----------|
| MSTRG. 23470. 1  | 1. 7738    | coding    |
| MSTRG. 23470. 2  | 2. 03276   | coding    |
| MSTRG. 23474. 2  | 1. 90291   | coding    |
| MSTRG. 23479. 8  | 1. 51504   | coding    |
| MSTRG. 23479. 5  | 1. 96798   | coding    |
| MSTRG. 23479. 7  | 1. 85541   | coding    |
| MSTRG. 23479. 9  | 1. 66718   | coding    |
| MSTRG. 23479. 3  | 1. 55232   | coding    |
| MSTRG. 23479. 10 | 1. 57631   | coding    |
| MSTRG. 23479. 11 | 1. 60251   | coding    |
| MSTRG. 23482. 3  | 1. 67638   | coding    |
| MSTRG. 23482. 4  | 1. 79861   | coding    |
| MSTRG. 23484. 1  | 1. 35171   | coding    |
| MSTRG. 23485. 2  | 1. 07089   | coding    |
| MSTRG. 23486. 1  | 1. 57066   | coding    |
| MSTRG. 23488. 2  | 0. 986624  | coding    |
| MSTRG. 23488. 4  | 0. 209761  | coding    |
| MSTRG. 23491. 2  | -0. 036135 | noncoding |
| MSTRG. 23492. 2  | 1. 76784   | coding    |
| MSTRG. 23492. 5  | 1. 18829   | coding    |
| MSTRG. 23495. 1  | 1. 86836   | coding    |
| MSTRG. 23505. 2  | 0. 857663  | coding    |
| MSTRG. 23510. 2  | 0. 946635  | coding    |
| MSTRG. 23515. 4  | 0. 908681  | coding    |
| MSTRG. 23520. 1  | 0. 136083  | coding    |
| MSTRG. 23520. 2  | 0. 234146  | coding    |
| MSTRG. 23520. 3  | 0. 32191   | coding    |
| MSTRG. 23520. 4  | 0. 367147  | coding    |
| MSTRG. 23513. 1  | 0. 684014  | coding    |
| MSTRG. 23522. 5  | 0. 88436   | coding    |
| MSTRG. 23522. 3  | 1. 07925   | coding    |
| MSTRG. 23522. 4  | 1. 08747   | coding    |
| MSTRG. 23525. 2  | 1. 71418   | coding    |
| MSTRG. 23528. 2  | 1. 32276   | coding    |
| MSTRG. 23529. 9  | 2. 29485   | coding    |
| MSTRG. 23530. 1  | 1. 44897   | coding    |
| MSTRG. 23531. 2  | 1. 69031   | coding    |
| MSTRG. 23531. 1  | 1. 64595   | coding    |
| MSTRG. 23530. 3  | 0. 969709  | coding    |
| MSTRG. 23532. 1  | -1. 56217  | noncoding |
| MSTRG. 23535. 3  | 2. 01088   | coding    |
| MSTRG. 23535. 2  | 2. 012     | coding    |
| MSTRG. 23535. 4  | 1. 52928   | coding    |
| MSTRG. 23535. 6  | 1. 86767   | coding    |
| MSTRG. 23534. 2  | -0. 057506 | noncoding |
| MSTRG. 23545. 2  | 2. 67628   | coding    |
| MSTRG. 23550. 1  | 2. 14654   | coding    |
| MSTRG. 23550. 3  | 1. 94183   | coding    |
| MSTRG. 23550. 4  | 2. 21634   | coding    |
| MSTRG. 23551. 4  | 0. 656775  | coding    |
| MSTRG. 23552. 4  | -0. 242061 | noncoding |
| MSTRG. 23552. 5  | 0. 035093  | coding    |
| MSTRG. 23552. 2  | 0. 067042  | coding    |
| MSTRG. 23552. 3  | 0. 287976  | coding    |

|                 |           |           |
|-----------------|-----------|-----------|
| MSTRG. 23553.4  | 1.08969   | coding    |
| MSTRG. 23567.3  | 3.26652   | coding    |
| MSTRG. 23568.2  | 1.48517   | coding    |
| MSTRG. 23568.3  | -0.934958 | noncoding |
| MSTRG. 23572.3  | 0.01343   | coding    |
| MSTRG. 23572.4  | -0.012145 | noncoding |
| MSTRG. 23574.4  | 0.648538  | coding    |
| MSTRG. 23575.2  | 0.00234   | coding    |
| MSTRG. 23559.4  | 2.10113   | coding    |
| MSTRG. 23559.5  | 2.16081   | coding    |
| MSTRG. 23560.2  | -1.11856  | noncoding |
| MSTRG. 23561.1  | 1.57896   | coding    |
| MSTRG. 23561.2  | 0.466445  | coding    |
| MSTRG. 23556.1  | -0.527246 | noncoding |
| MSTRG. 23558.2  | 2.3565    | coding    |
| MSTRG. 23562.1  | -0.865754 | noncoding |
| MSTRG. 23577.2  | 0.413657  | coding    |
| MSTRG. 23579.1  | 2.04668   | coding    |
| MSTRG. 23580.1  | 0.559069  | coding    |
| MSTRG. 23582.1  | 0.444968  | coding    |
| MSTRG. 23583.2  | 3.23084   | coding    |
| MSTRG. 23585.4  | -0.45943  | noncoding |
| MSTRG. 23586.1  | 1.21783   | coding    |
| MSTRG. 23586.2  | 0.658141  | coding    |
| MSTRG. 23586.3  | 1.2147    | coding    |
| MSTRG. 23585.6  | -0.091949 | noncoding |
| MSTRG. 23585.7  | 0.13777   | coding    |
| MSTRG. 23585.8  | 0.333758  | coding    |
| MSTRG. 23585.9  | 0.092503  | coding    |
| MSTRG. 23585.10 | 0.226465  | coding    |
| MSTRG. 23585.11 | 0.238462  | coding    |
| MSTRG. 23587.1  | -0.045459 | noncoding |
| MSTRG. 23587.2  | -0.209914 | noncoding |
| MSTRG. 23592.1  | 0.859665  | coding    |
| MSTRG. 23593.1  | -0.040299 | noncoding |
| MSTRG. 23594.1  | -0.136648 | noncoding |
| MSTRG. 23594.2  | -0.420332 | noncoding |
| MSTRG. 23594.3  | 0.481314  | coding    |
| MSTRG. 23594.4  | 0.120248  | coding    |
| MSTRG. 23595.1  | -0.370524 | noncoding |
| MSTRG. 23595.2  | -0.61785  | noncoding |
| MSTRG. 23595.3  | -0.221862 | noncoding |
| MSTRG. 23595.4  | -0.341515 | noncoding |
| MSTRG. 23594.5  | -1.00911  | noncoding |
| MSTRG. 23597.2  | 1.23127   | coding    |
| MSTRG. 23597.3  | 0.443318  | coding    |
| MSTRG. 23598.1  | 1.26678   | coding    |
| MSTRG. 23598.2  | 1.57842   | coding    |
| MSTRG. 23598.3  | 1.42857   | coding    |
| MSTRG. 23598.4  | 0.858967  | coding    |
| MSTRG. 23603.2  | 1.79392   | coding    |
| MSTRG. 23607.2  | -1.9715   | noncoding |
| MSTRG. 23608.2  | -1.2635   | noncoding |
| MSTRG. 23619.1  | -0.256158 | noncoding |

|                  |            |           |
|------------------|------------|-----------|
| MSTRG. 23621. 5  | 1. 18286   | coding    |
| MSTRG. 23621. 4  | 2. 43415   | coding    |
| MSTRG. 23621. 1  | 2. 73155   | coding    |
| MSTRG. 23621. 6  | 2. 73344   | coding    |
| MSTRG. 23621. 3  | 2. 24991   | coding    |
| MSTRG. 23622. 1  | -1. 23056  | noncoding |
| MSTRG. 23621. 7  | 1. 35577   | coding    |
| MSTRG. 23621. 9  | 2. 45412   | coding    |
| MSTRG. 23621. 11 | 1. 90855   | coding    |
| MSTRG. 23621. 17 | -0. 032393 | noncoding |
| MSTRG. 23621. 18 | 0. 93229   | coding    |
| MSTRG. 23623. 1  | -1. 50489  | noncoding |
| MSTRG. 23629. 1  | 0. 094615  | coding    |
| MSTRG. 23630. 1  | 0. 170128  | coding    |
| MSTRG. 23630. 2  | 0. 026354  | coding    |
| MSTRG. 23630. 3  | -0. 609377 | noncoding |
| MSTRG. 23630. 4  | 0. 879913  | coding    |
| MSTRG. 23631. 1  | -0. 252778 | noncoding |
| MSTRG. 23616. 2  | 0. 348283  | coding    |
| MSTRG. 23753. 1  | -0. 395453 | noncoding |
| MSTRG. 23754. 2  | 1. 08258   | coding    |
| MSTRG. 23754. 1  | 1. 61105   | coding    |
| MSTRG. 23754. 4  | 0. 636537  | coding    |
| MSTRG. 23754. 3  | 1. 2723    | coding    |
| MSTRG. 23754. 5  | -0. 274437 | noncoding |
| MSTRG. 23754. 7  | 1. 43357   | coding    |
| MSTRG. 23754. 13 | 1. 2097    | coding    |
| MSTRG. 23754. 14 | 0. 802874  | coding    |
| MSTRG. 23754. 16 | 0. 589662  | coding    |
| MSTRG. 23758. 1  | -2. 42822  | noncoding |
| MSTRG. 23763. 1  | 0. 396809  | coding    |
| MSTRG. 23769. 5  | 1. 07207   | coding    |
| MSTRG. 23769. 6  | 0. 940023  | coding    |
| MSTRG. 23769. 8  | 1. 50987   | coding    |
| MSTRG. 23770. 2  | 1. 48476   | coding    |
| MSTRG. 23770. 1  | 1. 51002   | coding    |
| MSTRG. 23770. 3  | 1. 61572   | coding    |
| MSTRG. 23770. 4  | 0. 766495  | coding    |
| MSTRG. 23770. 5  | 1. 17477   | coding    |
| MSTRG. 23770. 6  | 1. 43695   | coding    |
| MSTRG. 23770. 7  | 1. 2615    | coding    |
| MSTRG. 23770. 8  | 1. 16373   | coding    |
| MSTRG. 23770. 10 | 1. 43676   | coding    |
| MSTRG. 23770. 9  | 1. 53667   | coding    |
| MSTRG. 23773. 2  | 0. 356337  | coding    |
| MSTRG. 23769. 11 | -0. 310385 | noncoding |
| MSTRG. 23765. 13 | -1. 19051  | noncoding |
| MSTRG. 23765. 15 | -1. 17509  | noncoding |
| MSTRG. 23765. 10 | -1. 1764   | noncoding |
| MSTRG. 23765. 12 | -1. 17302  | noncoding |
| MSTRG. 23765. 9  | -1. 15185  | noncoding |
| MSTRG. 23765. 8  | -0. 346693 | noncoding |
| MSTRG. 23765. 11 | -0. 666368 | noncoding |
| MSTRG. 23765. 14 | -0. 60717  | noncoding |

|                  |            |           |
|------------------|------------|-----------|
| MSTRG. 23765. 4  | -0. 403332 | noncoding |
| MSTRG. 23765. 7  | -0. 533322 | noncoding |
| MSTRG. 23765. 5  | -0. 795549 | noncoding |
| MSTRG. 23765. 6  | -0. 626601 | noncoding |
| MSTRG. 23770. 13 | 1. 08602   | coding    |
| MSTRG. 23774. 1  | 1. 47238   | coding    |
| MSTRG. 23770. 14 | -1. 3018   | noncoding |
| MSTRG. 23775. 1  | -1. 86507  | noncoding |
| MSTRG. 23776. 1  | -0. 70657  | noncoding |
| MSTRG. 23777. 1  | 2. 02604   | coding    |
| MSTRG. 23777. 2  | 1. 39367   | coding    |
| MSTRG. 23777. 3  | 1. 69376   | coding    |
| MSTRG. 23778. 1  | -0. 164501 | noncoding |
| MSTRG. 23778. 2  | 1. 37533   | coding    |
| MSTRG. 23779. 1  | 0. 672524  | coding    |
| MSTRG. 23779. 2  | -0. 613729 | noncoding |
| MSTRG. 23779. 3  | -0. 511807 | noncoding |
| MSTRG. 23783. 1  | -0. 744523 | noncoding |
| MSTRG. 23785. 1  | -1. 69421  | noncoding |
| MSTRG. 23786. 1  | -1. 79512  | noncoding |
| MSTRG. 23788. 2  | 0. 060207  | coding    |
| MSTRG. 23788. 3  | -0. 271215 | noncoding |
| MSTRG. 23788. 4  | 0. 099179  | coding    |
| MSTRG. 23788. 5  | 0. 33786   | coding    |
| MSTRG. 23788. 7  | 0. 282931  | coding    |
| MSTRG. 23788. 6  | -0. 828654 | noncoding |
| MSTRG. 23788. 8  | -0. 783903 | noncoding |
| MSTRG. 23788. 9  | -1. 2033   | noncoding |
| MSTRG. 23789. 1  | 1. 14458   | coding    |
| MSTRG. 23790. 1  | -1. 68612  | noncoding |
| MSTRG. 23790. 2  | -1. 27612  | noncoding |
| MSTRG. 23789. 2  | 0. 349315  | coding    |
| MSTRG. 23789. 3  | -0. 106723 | noncoding |
| MSTRG. 23791. 1  | 2. 09432   | coding    |
| MSTRG. 23791. 3  | 1. 56608   | coding    |
| MSTRG. 23791. 5  | 1. 99022   | coding    |
| MSTRG. 23791. 6  | 2. 08204   | coding    |
| MSTRG. 23791. 4  | 2. 00123   | coding    |
| MSTRG. 23791. 7  | 1. 43264   | coding    |
| MSTRG. 23791. 8  | 2. 00781   | coding    |
| MSTRG. 23791. 9  | 1. 42427   | coding    |
| MSTRG. 23791. 11 | 1. 4364    | coding    |
| MSTRG. 23791. 10 | 1. 40372   | coding    |
| MSTRG. 23632. 1  | 0. 257257  | coding    |
| MSTRG. 23632. 3  | 0. 91914   | coding    |
| MSTRG. 23632. 4  | 1. 27813   | coding    |
| MSTRG. 23632. 5  | 1. 15441   | coding    |
| MSTRG. 23632. 6  | 1. 18938   | coding    |
| MSTRG. 23632. 7  | 0. 871488  | coding    |
| MSTRG. 23632. 8  | 1. 14528   | coding    |
| MSTRG. 23632. 9  | 0. 830069  | coding    |
| MSTRG. 23632. 10 | -1. 39655  | noncoding |
| MSTRG. 23632. 11 | 0. 47774   | coding    |
| MSTRG. 23635. 2  | 0. 162107  | coding    |

|                 |            |           |
|-----------------|------------|-----------|
| MSTRG. 23635. 3 | 0. 121277  | coding    |
| MSTRG. 23639. 1 | 0. 767096  | coding    |
| MSTRG. 23651. 1 | 0. 512059  | coding    |
| MSTRG. 23652. 1 | -2. 32131  | noncoding |
| MSTRG. 23653. 1 | -2. 00954  | noncoding |
| MSTRG. 23654. 1 | 0. 943224  | coding    |
| MSTRG. 23659. 1 | -0. 608015 | noncoding |
| MSTRG. 23651. 2 | -1. 30194  | noncoding |
| MSTRG. 23660. 1 | -1. 17275  | noncoding |
| MSTRG. 23651. 3 | -2. 23396  | noncoding |
| MSTRG. 23651. 4 | 0. 303989  | coding    |
| MSTRG. 23651. 5 | -1. 96092  | noncoding |
| MSTRG. 23663. 1 | -0. 825417 | noncoding |
| MSTRG. 23664. 1 | -1. 359    | noncoding |
| MSTRG. 23651. 6 | 1. 79255   | coding    |
| MSTRG. 23651. 7 | -0. 330774 | noncoding |
| MSTRG. 23651. 8 | -1. 90641  | noncoding |
| MSTRG. 23666. 1 | -1. 87217  | noncoding |
| MSTRG. 23667. 1 | -0. 874087 | noncoding |
| MSTRG. 23668. 1 | -2. 22052  | noncoding |
| MSTRG. 23670. 1 | 1. 51916   | coding    |
| MSTRG. 23670. 2 | 1. 23594   | coding    |
| MSTRG. 23670. 3 | 1. 25621   | coding    |
| MSTRG. 23671. 1 | -2. 1784   | noncoding |
| MSTRG. 23644. 2 | -0. 508269 | noncoding |
| MSTRG. 23644. 1 | -1. 31775  | noncoding |
| MSTRG. 23644. 3 | -0. 820348 | noncoding |
| MSTRG. 23644. 4 | -0. 745088 | noncoding |
| MSTRG. 23677. 1 | 1. 67441   | coding    |
| MSTRG. 23677. 2 | 1. 17668   | coding    |
| MSTRG. 23678. 6 | 1. 85748   | coding    |
| MSTRG. 23681. 4 | 1. 01075   | coding    |
| MSTRG. 23681. 5 | 0. 995521  | coding    |
| MSTRG. 23681. 6 | 1. 57772   | coding    |
| MSTRG. 23683. 1 | 0. 674542  | coding    |
| MSTRG. 23683. 2 | -0. 027991 | noncoding |
| MSTRG. 23683. 3 | -0. 080537 | noncoding |
| MSTRG. 23690. 1 | -0. 823964 | noncoding |
| MSTRG. 23694. 7 | 0. 605042  | coding    |
| MSTRG. 23694. 5 | 1. 12543   | coding    |
| MSTRG. 23694. 6 | 0. 764263  | coding    |
| MSTRG. 23694. 4 | 1. 28701   | coding    |
| MSTRG. 23696. 1 | 1. 95603   | coding    |
| MSTRG. 23696. 3 | 1. 86996   | coding    |
| MSTRG. 23687. 1 | -0. 145385 | noncoding |
| MSTRG. 23688. 1 | -1. 21637  | noncoding |
| MSTRG. 23698. 3 | 0. 864152  | coding    |
| MSTRG. 23701. 3 | 1. 2092    | coding    |
| MSTRG. 23706. 1 | 2. 10232   | coding    |
| MSTRG. 23706. 3 | 2. 61682   | coding    |
| MSTRG. 23706. 2 | 2. 11421   | coding    |
| MSTRG. 23699. 1 | 0. 518195  | coding    |
| MSTRG. 23709. 3 | 1. 97841   | coding    |
| MSTRG. 23709. 4 | 2. 27529   | coding    |

|                |           |           |
|----------------|-----------|-----------|
| MSTRG. 23709.5 | 2.14614   | coding    |
| MSTRG. 23709.6 | 1.90083   | coding    |
| MSTRG. 23709.7 | 1.24605   | coding    |
| MSTRG. 23712.1 | -0.72605  | noncoding |
| MSTRG. 23711.2 | -1.06872  | noncoding |
| MSTRG. 23716.1 | 1.42455   | coding    |
| MSTRG. 23716.2 | 1.43574   | coding    |
| MSTRG. 23716.6 | 0.538354  | coding    |
| MSTRG. 23716.7 | 0.334467  | coding    |
| MSTRG. 23717.2 | -0.869271 | noncoding |
| MSTRG. 23717.3 | 0.029814  | coding    |
| MSTRG. 23718.2 | 1.81491   | coding    |
| MSTRG. 23720.4 | 1.74911   | coding    |
| MSTRG. 23720.5 | 1.73911   | coding    |
| MSTRG. 23727.3 | 1.03277   | coding    |
| MSTRG. 23728.1 | -1.27725  | noncoding |
| MSTRG. 23728.2 | -0.434177 | noncoding |
| MSTRG. 23731.2 | 2.0906    | coding    |
| MSTRG. 23732.2 | 2.21589   | coding    |
| MSTRG. 23732.3 | 2.17682   | coding    |
| MSTRG. 23736.1 | 0.570638  | coding    |
| MSTRG. 23743.2 | 1.87278   | coding    |
| MSTRG. 23744.2 | 0.259107  | coding    |
| MSTRG. 23744.3 | 0.298421  | coding    |
| MSTRG. 23797.2 | 1.08622   | coding    |
| MSTRG. 23801.4 | 0.706926  | coding    |
| MSTRG. 23801.3 | 1.14617   | coding    |
| MSTRG. 23801.5 | 1.06312   | coding    |
| MSTRG. 23809.2 | 1.47457   | coding    |
| MSTRG. 23794.1 | 0.92655   | coding    |
| MSTRG. 23794.3 | 0.645211  | coding    |
| MSTRG. 23814.1 | 1.17855   | coding    |
| MSTRG. 23817.2 | -0.447814 | noncoding |
| MSTRG. 23841.3 | 0.040404  | coding    |
| MSTRG. 23841.2 | 1.90335   | coding    |
| MSTRG. 23846.1 | -0.067063 | noncoding |
| MSTRG. 23846.2 | -0.012945 | noncoding |
| MSTRG. 23846.3 | -0.002499 | noncoding |
| MSTRG. 23847.1 | 1.01634   | coding    |
| MSTRG. 23849.1 | -0.864548 | noncoding |
| MSTRG. 23855.2 | 0.339381  | coding    |
| MSTRG. 23857.1 | -0.282287 | noncoding |
| MSTRG. 23857.2 | 0.425942  | coding    |
| MSTRG. 23855.3 | 0.618337  | coding    |
| MSTRG. 23855.4 | 0.993495  | coding    |
| MSTRG. 23860.1 | 0.245623  | coding    |
| MSTRG. 23860.2 | 0.474614  | coding    |
| MSTRG. 23857.3 | -1.68918  | noncoding |
| MSTRG. 23855.9 | 1.12174   | coding    |
| MSTRG. 23824.1 | -1.73367  | noncoding |
| MSTRG. 23825.1 | 0.942262  | coding    |
| MSTRG. 23825.3 | 1.52809   | coding    |
| MSTRG. 23825.4 | 1.0653    | coding    |
| MSTRG. 23825.5 | 0.472     | coding    |

|                  |           |           |
|------------------|-----------|-----------|
| MSTRG. 23827. 1  | -0.604162 | noncoding |
| MSTRG. 23828. 1  | -1.56799  | noncoding |
| MSTRG. 23833. 1  | 0.527135  | coding    |
| MSTRG. 23834. 1  | 1.82237   | coding    |
| MSTRG. 23834. 2  | 2.03039   | coding    |
| MSTRG. 23834. 3  | 1.42194   | coding    |
| MSTRG. 23834. 4  | 1.79472   | coding    |
| MSTRG. 23834. 5  | 1.61634   | coding    |
| MSTRG. 23868. 2  | 1.82164   | coding    |
| MSTRG. 23868. 4  | 1.83574   | coding    |
| MSTRG. 23872. 6  | -0.206367 | noncoding |
| MSTRG. 23872. 7  | 0.767777  | coding    |
| MSTRG. 23872. 3  | 0.673078  | coding    |
| MSTRG. 23872. 1  | 0.923469  | coding    |
| MSTRG. 23873. 1  | -1.03414  | noncoding |
| MSTRG. 23872. 8  | -0.324287 | noncoding |
| MSTRG. 23872. 9  | -0.408615 | noncoding |
| MSTRG. 23875. 1  | 0.222613  | coding    |
| MSTRG. 23872. 10 | 1.83151   | coding    |
| MSTRG. 23877. 6  | 2.24624   | coding    |
| MSTRG. 23878. 2  | 0.108779  | coding    |
| MSTRG. 23879. 2  | 1.68693   | coding    |
| MSTRG. 23879. 3  | 1.62461   | coding    |
| MSTRG. 23879. 4  | 0.614196  | coding    |
| MSTRG. 23880. 1  | 0.721804  | coding    |
| MSTRG. 23880. 3  | 1.23098   | coding    |
| MSTRG. 23881. 3  | 1.21845   | coding    |
| MSTRG. 23881. 5  | 1.13916   | coding    |
| MSTRG. 23883. 1  | -2.07782  | noncoding |
| MSTRG. 23840. 2  | 1.634     | coding    |
| MSTRG. 23890. 1  | 0.512928  | coding    |
| MSTRG. 23894. 3  | 1.28106   | coding    |
| MSTRG. 23898. 2  | 1.31959   | coding    |
| MSTRG. 23927. 1  | -1.07408  | noncoding |
| MSTRG. 23929. 1  | -1.82019  | noncoding |
| MSTRG. 23931. 3  | 0.849995  | coding    |
| MSTRG. 23933. 2  | 0.778158  | coding    |
| MSTRG. 23944. 2  | -1.23453  | noncoding |
| MSTRG. 23946. 1  | -2.12616  | noncoding |
| MSTRG. 23947. 1  | 1.04597   | coding    |
| MSTRG. 23947. 2  | 0.514774  | coding    |
| MSTRG. 23949. 1  | 1.8862    | coding    |
| MSTRG. 23949. 2  | 1.94357   | coding    |
| MSTRG. 23950. 1  | -1.67683  | noncoding |
| MSTRG. 23950. 2  | -1.91414  | noncoding |
| MSTRG. 23952. 2  | 1.2536    | coding    |
| MSTRG. 23952. 3  | 1.06613   | coding    |
| MSTRG. 23952. 5  | 0.185295  | coding    |
| MSTRG. 23952. 4  | 0.914103  | coding    |
| MSTRG. 23954. 3  | 1.48464   | coding    |
| MSTRG. 23954. 5  | 1.0496    | coding    |
| MSTRG. 23962. 5  | -0.855102 | noncoding |
| MSTRG. 23962. 8  | 0.097841  | coding    |
| MSTRG. 23962. 4  | -0.351625 | noncoding |



|                  |            |           |
|------------------|------------|-----------|
| MSTRG. 23962. 6  | 0. 436608  | coding    |
| MSTRG. 23962. 1  | 0. 326669  | coding    |
| MSTRG. 23962. 3  | 1. 25191   | coding    |
| MSTRG. 23963. 1  | -0. 523926 | noncoding |
| MSTRG. 23964. 1  | -0. 213053 | noncoding |
| MSTRG. 23962. 11 | 0. 404216  | coding    |
| MSTRG. 23962. 12 | 0. 259631  | coding    |
| MSTRG. 23965. 1  | -0. 403328 | noncoding |
| MSTRG. 23966. 1  | -0. 52322  | noncoding |
| MSTRG. 23962. 13 | -0. 312833 | noncoding |
| MSTRG. 23967. 1  | 1. 04444   | coding    |
| MSTRG. 23968. 1  | -0. 564781 | noncoding |
| MSTRG. 23958. 1  | -1. 17366  | noncoding |
| MSTRG. 23970. 2  | 0. 10216   | coding    |
| MSTRG. 23976. 1  | 1. 93697   | coding    |
| MSTRG. 23977. 1  | 2. 43661   | coding    |
| MSTRG. 23981. 3  | 2. 33673   | coding    |
| MSTRG. 23981. 4  | 1. 13558   | coding    |
| MSTRG. 23981. 5  | 1. 1675    | coding    |
| MSTRG. 23981. 6  | 2. 38887   | coding    |
| MSTRG. 23981. 7  | 2. 39068   | coding    |
| MSTRG. 23981. 8  | 1. 95359   | coding    |
| MSTRG. 23983. 4  | 0. 907207  | coding    |
| MSTRG. 23983. 3  | 2. 30025   | coding    |
| MSTRG. 23998. 5  | 1. 70854   | coding    |
| MSTRG. 23998. 6  | 1. 73034   | coding    |
| MSTRG. 23998. 7  | 1. 74897   | coding    |
| MSTRG. 23999. 11 | -0. 399066 | noncoding |
| MSTRG. 24000. 2  | -0. 117597 | noncoding |
| MSTRG. 24004. 1  | -1. 8815   | noncoding |
| MSTRG. 23986. 1  | -0. 824628 | noncoding |
| MSTRG. 23986. 2  | -1. 67885  | noncoding |
| MSTRG. 23987. 2  | -0. 102195 | noncoding |
| MSTRG. 23988. 1  | -1. 13459  | noncoding |
| MSTRG. 23988. 2  | 0. 529905  | coding    |
| MSTRG. 23989. 1  | 0. 779152  | coding    |
| MSTRG. 23988. 3  | 1. 05601   | coding    |
| MSTRG. 23988. 4  | 0. 768631  | coding    |
| MSTRG. 23990. 1  | -0. 631393 | noncoding |
| MSTRG. 23990. 2  | -0. 539585 | noncoding |
| MSTRG. 23990. 3  | -0. 131863 | noncoding |
| MSTRG. 23991. 1  | 0. 689428  | coding    |
| MSTRG. 23992. 1  | -1. 24947  | noncoding |
| MSTRG. 23984. 1  | 1. 05686   | coding    |
| MSTRG. 23995. 1  | 1. 54631   | coding    |
| MSTRG. 23995. 4  | 0. 232592  | coding    |
| MSTRG. 23996. 4  | -0. 845267 | noncoding |
| MSTRG. 23997. 1  | -1. 54821  | noncoding |
| MSTRG. 24007. 1  | -1. 99569  | noncoding |
| MSTRG. 24020. 1  | 2. 98737   | coding    |
| MSTRG. 24020. 3  | -0. 124675 | noncoding |
| MSTRG. 24020. 4  | -0. 248398 | noncoding |
| MSTRG. 24023. 1  | 0. 094959  | coding    |
| MSTRG. 24022. 3  | 0. 702791  | coding    |

|                  |            |           |
|------------------|------------|-----------|
| MSTRG. 24026. 3  | 2. 32417   | coding    |
| MSTRG. 24026. 1  | 1. 06624   | coding    |
| MSTRG. 24026. 4  | 0. 265218  | coding    |
| MSTRG. 24027. 1  | 1. 61111   | coding    |
| MSTRG. 24011. 2  | 2. 8541    | coding    |
| MSTRG. 24013. 3  | 2. 35486   | coding    |
| MSTRG. 24013. 5  | 2. 10248   | coding    |
| MSTRG. 24014. 1  | -1. 99302  | noncoding |
| MSTRG. 24015. 1  | 0. 530854  | coding    |
| MSTRG. 24016. 2  | 1. 29867   | coding    |
| MSTRG. 24017. 3  | 1. 66835   | coding    |
| MSTRG. 24019. 1  | 2. 59148   | coding    |
| MSTRG. 24019. 2  | -0. 559292 | noncoding |
| MSTRG. 24031. 2  | 0. 73186   | coding    |
| MSTRG. 24035. 1  | 2. 12754   | coding    |
| MSTRG. 24035. 3  | -0. 991127 | noncoding |
| MSTRG. 24036. 1  | -1. 538    | noncoding |
| MSTRG. 24037. 1  | -0. 361652 | noncoding |
| MSTRG. 24049. 1  | 2. 29376   | coding    |
| MSTRG. 24049. 2  | 2. 21305   | coding    |
| MSTRG. 24049. 8  | 1. 81769   | coding    |
| MSTRG. 24049. 9  | 2. 02566   | coding    |
| MSTRG. 24049. 10 | 2. 21334   | coding    |
| MSTRG. 24049. 12 | 1. 51531   | coding    |
| MSTRG. 24050. 2  | 1. 84292   | coding    |
| MSTRG. 24050. 3  | 1. 73663   | coding    |
| MSTRG. 24051. 1  | -0. 38394  | noncoding |
| MSTRG. 24041. 2  | 1. 07596   | coding    |
| MSTRG. 24057. 3  | 1. 65376   | coding    |
| MSTRG. 24057. 4  | 1. 93795   | coding    |
| MSTRG. 24058. 1  | -0. 659088 | noncoding |
| MSTRG. 24058. 2  | -1. 65752  | noncoding |
| MSTRG. 24062. 1  | 1. 28329   | coding    |
| MSTRG. 24062. 5  | 1. 53798   | coding    |
| MSTRG. 24062. 6  | 1. 54059   | coding    |
| MSTRG. 24062. 8  | 1. 24384   | coding    |
| MSTRG. 24062. 9  | 1. 46447   | coding    |
| MSTRG. 24059. 1  | 0. 020836  | coding    |
| MSTRG. 24059. 3  | 0. 142768  | coding    |
| MSTRG. 24059. 4  | 0. 345296  | coding    |
| MSTRG. 24063. 1  | 0. 163451  | coding    |
| MSTRG. 24063. 2  | 0. 157489  | coding    |
| MSTRG. 24063. 3  | 0. 0433    | coding    |
| MSTRG. 24063. 6  | 0. 047662  | coding    |
| MSTRG. 24071. 2  | -0. 074587 | noncoding |
| MSTRG. 24071. 1  | 0. 295727  | coding    |
| MSTRG. 24081. 1  | 0. 603299  | coding    |
| MSTRG. 24081. 2  | 0. 640472  | coding    |
| MSTRG. 24081. 9  | -0. 143701 | noncoding |
| MSTRG. 24081. 5  | -0. 266314 | noncoding |
| MSTRG. 24081. 7  | 0. 129816  | coding    |
| MSTRG. 24081. 10 | -0. 228808 | noncoding |
| MSTRG. 24075. 2  | 0. 800365  | coding    |
| MSTRG. 24082. 1  | 1. 21274   | coding    |

|                  |            |           |
|------------------|------------|-----------|
| MSTRG. 24082. 4  | 2. 04346   | coding    |
| MSTRG. 24082. 3  | 2. 046     | coding    |
| MSTRG. 24086. 1  | 2. 82759   | coding    |
| MSTRG. 24093. 3  | -0. 503243 | noncoding |
| MSTRG. 24095. 3  | 2. 28621   | coding    |
| MSTRG. 24095. 2  | 2. 4481    | coding    |
| MSTRG. 24098. 3  | 0. 388843  | coding    |
| MSTRG. 24098. 4  | 0. 143272  | coding    |
| MSTRG. 24099. 1  | -1. 62347  | noncoding |
| MSTRG. 24102. 1  | -0. 534921 | noncoding |
| MSTRG. 24104. 1  | -0. 543709 | noncoding |
| MSTRG. 24105. 1  | -1. 08782  | noncoding |
| MSTRG. 24105. 2  | -0. 97233  | noncoding |
| MSTRG. 24107. 1  | -1. 57366  | noncoding |
| MSTRG. 24108. 1  | -2. 06037  | noncoding |
| MSTRG. 24111. 2  | 0. 381891  | coding    |
| MSTRG. 24112. 1  | -0. 766452 | noncoding |
| MSTRG. 24113. 3  | 0. 510025  | coding    |
| MSTRG. 24114. 2  | 0. 423371  | coding    |
| MSTRG. 24115. 1  | 2. 62696   | coding    |
| MSTRG. 24115. 3  | 1. 60324   | coding    |
| MSTRG. 24117. 2  | 2. 55901   | coding    |
| MSTRG. 24117. 3  | 2. 48696   | coding    |
| MSTRG. 24125. 1  | -2. 38599  | noncoding |
| MSTRG. 24125. 2  | -2. 32636  | noncoding |
| MSTRG. 24123. 1  | -0. 499397 | noncoding |
| MSTRG. 24127. 1  | 1. 14777   | coding    |
| MSTRG. 24134. 2  | 0. 65805   | coding    |
| MSTRG. 24135. 4  | 1. 89195   | coding    |
| MSTRG. 24135. 2  | 3. 31805   | coding    |
| MSTRG. 24135. 6  | 1. 77039   | coding    |
| MSTRG. 24136. 8  | 0. 354607  | coding    |
| MSTRG. 24136. 9  | -0. 395499 | noncoding |
| MSTRG. 24139. 1  | 0. 181231  | coding    |
| MSTRG. 24140. 1  | -1. 30414  | noncoding |
| MSTRG. 24147. 2  | 0. 014242  | coding    |
| MSTRG. 24173. 1  | 3. 01269   | coding    |
| MSTRG. 24173. 3  | 3. 09716   | coding    |
| MSTRG. 24173. 4  | 3. 07829   | coding    |
| MSTRG. 24173. 2  | 3. 05762   | coding    |
| MSTRG. 24173. 6  | 3. 18537   | coding    |
| MSTRG. 24173. 7  | 3. 14991   | coding    |
| MSTRG. 24173. 5  | 3. 03762   | coding    |
| MSTRG. 24173. 10 | 2. 87782   | coding    |
| MSTRG. 24173. 8  | 3. 05413   | coding    |
| MSTRG. 24173. 9  | 3. 07252   | coding    |
| MSTRG. 24173. 13 | 3. 2023    | coding    |
| MSTRG. 24173. 14 | 3. 28696   | coding    |
| MSTRG. 24173. 11 | 3. 15856   | coding    |
| MSTRG. 24173. 12 | 3. 17734   | coding    |
| MSTRG. 24173. 15 | 3. 17983   | coding    |
| MSTRG. 24173. 16 | 3. 11401   | coding    |
| MSTRG. 24173. 17 | 3. 19183   | coding    |
| MSTRG. 24175. 1  | -0. 566764 | noncoding |

|                  |            |           |
|------------------|------------|-----------|
| MSTRG. 24148. 2  | 1. 77797   | coding    |
| MSTRG. 24152. 1  | -1. 73358  | noncoding |
| MSTRG. 24162. 1  | -0. 762504 | noncoding |
| MSTRG. 24163. 1  | 0. 516903  | coding    |
| MSTRG. 24164. 1  | -1. 76885  | noncoding |
| MSTRG. 24163. 2  | 2. 89928   | coding    |
| MSTRG. 24163. 4  | 1. 28151   | coding    |
| MSTRG. 24163. 5  | 1. 54694   | coding    |
| MSTRG. 24163. 6  | -0. 169138 | noncoding |
| MSTRG. 24158. 1  | 1. 64112   | coding    |
| MSTRG. 24153. 1  | 1. 00921   | coding    |
| MSTRG. 24168. 1  | -0. 610685 | noncoding |
| MSTRG. 24171. 1  | -0. 000363 | noncoding |
| MSTRG. 24172. 1  | 2. 6609    | coding    |
| MSTRG. 24172. 2  | 2. 06765   | coding    |
| MSTRG. 24184. 1  | 0. 834089  | coding    |
| MSTRG. 24184. 3  | 0. 481355  | coding    |
| MSTRG. 24184. 4  | 0. 191153  | coding    |
| MSTRG. 24185. 3  | 2. 03451   | coding    |
| MSTRG. 24187. 1  | -0. 466141 | noncoding |
| MSTRG. 24187. 2  | 0. 848375  | coding    |
| MSTRG. 24187. 3  | -0. 485112 | noncoding |
| MSTRG. 24187. 4  | -0. 412713 | noncoding |
| MSTRG. 24187. 5  | -0. 832647 | noncoding |
| MSTRG. 24183. 1  | -1. 96796  | noncoding |
| MSTRG. 24190. 6  | -0. 591689 | noncoding |
| MSTRG. 24195. 1  | -2. 41418  | noncoding |
| MSTRG. 24197. 1  | 0. 669787  | coding    |
| MSTRG. 24198. 1  | 1. 58984   | coding    |
| MSTRG. 24198. 2  | 1. 89217   | coding    |
| MSTRG. 24201. 3  | 1. 9067    | coding    |
| MSTRG. 24204. 4  | 1. 31225   | coding    |
| MSTRG. 24209. 1  | 1. 32689   | coding    |
| MSTRG. 24209. 3  | 1. 44284   | coding    |
| MSTRG. 24209. 4  | 1. 34873   | coding    |
| MSTRG. 24211. 2  | 1. 7042    | coding    |
| MSTRG. 24211. 3  | 1. 09145   | coding    |
| MSTRG. 24212. 1  | -1. 92172  | noncoding |
| MSTRG. 24207. 5  | 0. 579457  | coding    |
| MSTRG. 24207. 4  | -0. 4247   | noncoding |
| MSTRG. 24215. 1  | -1. 23154  | noncoding |
| MSTRG. 24214. 3  | 2. 48357   | coding    |
| MSTRG. 24214. 4  | 2. 48663   | coding    |
| MSTRG. 24216. 1  | 1. 5809    | coding    |
| MSTRG. 24222. 1  | -0. 703838 | noncoding |
| MSTRG. 24223. 1  | 0. 00567   | coding    |
| MSTRG. 24224. 1  | 0. 611024  | coding    |
| MSTRG. 24225. 2  | 1. 96091   | coding    |
| MSTRG. 24228. 5  | 0. 538749  | coding    |
| MSTRG. 24228. 6  | 0. 781223  | coding    |
| MSTRG. 24228. 7  | -0. 184983 | noncoding |
| MSTRG. 24229. 7  | 1. 11565   | coding    |
| MSTRG. 24229. 10 | 0. 99656   | coding    |
| MSTRG. 24218. 3  | 0. 389736  | coding    |

|                |           |           |
|----------------|-----------|-----------|
| MSTRG. 24230.2 | 1.82859   | coding    |
| MSTRG. 24232.3 | 0.905051  | coding    |
| MSTRG. 24233.3 | 2.56822   | coding    |
| MSTRG. 24236.3 | 0.907532  | coding    |
| MSTRG. 24252.5 | 1.83103   | coding    |
| MSTRG. 24252.6 | 2.10854   | coding    |
| MSTRG. 24252.7 | 0.405141  | coding    |
| MSTRG. 24252.8 | 1.25427   | coding    |
| MSTRG. 24252.9 | 1.17709   | coding    |
| MSTRG. 24250.1 | 1.04395   | coding    |
| MSTRG. 24250.3 | 0.581734  | coding    |
| MSTRG. 24250.5 | 0.793462  | coding    |
| MSTRG. 24250.8 | 0.812818  | coding    |
| MSTRG. 24250.4 | 0.722329  | coding    |
| MSTRG. 24250.2 | 0.768467  | coding    |
| MSTRG. 24250.7 | 0.778115  | coding    |
| MSTRG. 24257.5 | 1.75615   | coding    |
| MSTRG. 24257.4 | 1.95064   | coding    |
| MSTRG. 24257.3 | 2.31743   | coding    |
| MSTRG. 24258.5 | 2.07068   | coding    |
| MSTRG. 24258.4 | 1.97147   | coding    |
| MSTRG. 24260.1 | 0.151825  | coding    |
| MSTRG. 24262.1 | -1.71904  | noncoding |
| MSTRG. 24265.2 | 0.645634  | coding    |
| MSTRG. 24265.3 | 0.552953  | coding    |
| MSTRG. 24265.5 | 0.317239  | coding    |
| MSTRG. 24265.6 | 0.193318  | coding    |
| MSTRG. 24268.2 | -0.550288 | noncoding |
| MSTRG. 24269.3 | -1.71362  | noncoding |
| MSTRG. 24269.2 | 1.0586    | coding    |
| MSTRG. 24273.1 | 0.486842  | coding    |
| MSTRG. 24275.2 | 0.432321  | coding    |
| MSTRG. 24276.2 | 1.93245   | coding    |
| MSTRG. 24276.3 | 2.21396   | coding    |
| MSTRG. 24285.2 | 1.70559   | coding    |
| MSTRG. 24285.3 | 1.69105   | coding    |
| MSTRG. 24286.2 | 0.695733  | coding    |
| MSTRG. 24286.3 | -0.151313 | noncoding |
| MSTRG. 24288.2 | 0.416888  | coding    |
| MSTRG. 24288.3 | 0.611815  | coding    |
| MSTRG. 24288.4 | 0.917218  | coding    |
| MSTRG. 24283.3 | 0.523844  | coding    |
| MSTRG. 24283.5 | 1.44365   | coding    |
| MSTRG. 24283.6 | 0.583046  | coding    |
| MSTRG. 24282.2 | -1.50243  | noncoding |
| MSTRG. 24289.3 | 1.51467   | coding    |
| MSTRG. 24289.2 | 1.3753    | coding    |
| MSTRG. 24290.3 | 1.23256   | coding    |
| MSTRG. 24291.1 | 0.166622  | coding    |
| MSTRG. 24296.1 | -0.192618 | noncoding |
| MSTRG. 24297.2 | -0.195095 | noncoding |
| MSTRG. 24297.1 | 1.63929   | coding    |
| MSTRG. 24297.3 | 1.58336   | coding    |
| MSTRG. 24297.6 | 1.51814   | coding    |

|                 |            |           |
|-----------------|------------|-----------|
| MSTRG. 24297. 9 | 1. 07271   | coding    |
| MSTRG. 24295. 1 | -2. 02519  | noncoding |
| MSTRG. 24302. 1 | -1. 89389  | noncoding |
| MSTRG. 24303. 1 | 1. 67466   | coding    |
| MSTRG. 24313. 2 | 2. 03296   | coding    |
| MSTRG. 24315. 1 | 1. 1857    | coding    |
| MSTRG. 24314. 2 | 1. 40672   | coding    |
| MSTRG. 24318. 1 | 2. 05932   | coding    |
| MSTRG. 24318. 2 | 2. 08023   | coding    |
| MSTRG. 24318. 3 | 2. 02179   | coding    |
| MSTRG. 24318. 4 | 1. 89827   | coding    |
| MSTRG. 24306. 2 | 1. 39446   | coding    |
| MSTRG. 24306. 3 | 1. 62508   | coding    |
| MSTRG. 24307. 1 | 0. 210001  | coding    |
| MSTRG. 24307. 2 | 1. 38836   | coding    |
| MSTRG. 24307. 3 | 0. 678163  | coding    |
| MSTRG. 24307. 4 | 0. 332922  | coding    |
| MSTRG. 24309. 1 | 1. 74758   | coding    |
| MSTRG. 24305. 1 | -0. 059864 | noncoding |
| MSTRG. 24304. 4 | 0. 205429  | coding    |
| MSTRG. 24328. 2 | 2. 53147   | coding    |
| MSTRG. 24328. 5 | 0. 150607  | coding    |
| MSTRG. 24328. 7 | 0. 643381  | coding    |
| MSTRG. 24328. 8 | 1. 84125   | coding    |
| MSTRG. 24336. 3 | -0. 799864 | noncoding |
| MSTRG. 24338. 6 | 1. 61124   | coding    |
| MSTRG. 24339. 1 | 1. 91539   | coding    |
| MSTRG. 24340. 1 | -1. 59068  | noncoding |
| MSTRG. 24341. 3 | 2. 47518   | coding    |
| MSTRG. 24344. 1 | -1. 28348  | noncoding |
| MSTRG. 24346. 1 | 0. 876226  | coding    |
| MSTRG. 24346. 6 | 0. 973759  | coding    |
| MSTRG. 24346. 2 | 0. 864279  | coding    |
| MSTRG. 24346. 3 | 0. 975131  | coding    |
| MSTRG. 24346. 5 | 0. 890299  | coding    |
| MSTRG. 24346. 4 | 0. 913352  | coding    |
| MSTRG. 24346. 7 | 0. 93808   | coding    |
| MSTRG. 24348. 3 | 0. 880427  | coding    |
| MSTRG. 24350. 3 | 1. 8115    | coding    |
| MSTRG. 24350. 4 | 1. 60169   | coding    |
| MSTRG. 24350. 5 | 1. 78787   | coding    |
| MSTRG. 24351. 7 | 0. 166447  | coding    |
| MSTRG. 24351. 5 | 0. 65478   | coding    |
| MSTRG. 24351. 4 | 0. 400768  | coding    |
| MSTRG. 24351. 1 | 0. 493766  | coding    |
| MSTRG. 24351. 3 | 1. 18899   | coding    |
| MSTRG. 24351. 2 | 1. 2311    | coding    |
| MSTRG. 24352. 1 | -0. 902635 | noncoding |
| MSTRG. 24356. 3 | 0. 747922  | coding    |
| MSTRG. 24357. 1 | 0. 978943  | coding    |
| MSTRG. 24357. 3 | 1. 34896   | coding    |
| MSTRG. 24358. 5 | 1. 04863   | coding    |
| MSTRG. 24364. 1 | 1. 17938   | coding    |
| MSTRG. 24365. 4 | 3. 23441   | coding    |

|                  |            |           |
|------------------|------------|-----------|
| MSTRG. 24365. 8  | 3. 30632   | coding    |
| MSTRG. 24365. 9  | 3. 37602   | coding    |
| MSTRG. 24365. 10 | 3. 19329   | coding    |
| MSTRG. 24365. 11 | 3. 31489   | coding    |
| MSTRG. 24365. 6  | 3. 1602    | coding    |
| MSTRG. 24365. 3  | 3. 32334   | coding    |
| MSTRG. 24365. 5  | 3. 27681   | coding    |
| MSTRG. 24365. 1  | 3. 19397   | coding    |
| MSTRG. 24365. 12 | 3. 29329   | coding    |
| MSTRG. 24365. 13 | 3. 24084   | coding    |
| MSTRG. 24365. 14 | 3. 22511   | coding    |
| MSTRG. 24366. 1  | -1. 92868  | noncoding |
| MSTRG. 24367. 1  | -1. 86383  | noncoding |
| MSTRG. 24374. 2  | 0. 784242  | coding    |
| MSTRG. 24376. 1  | 1. 05047   | coding    |
| MSTRG. 24376. 2  | 0. 687506  | coding    |
| MSTRG. 24376. 5  | 0. 778384  | coding    |
| MSTRG. 24376. 6  | 0. 671335  | coding    |
| MSTRG. 24378. 4  | 0. 795644  | coding    |
| MSTRG. 24378. 5  | 0. 649561  | coding    |
| MSTRG. 24379. 1  | 0. 141898  | coding    |
| MSTRG. 24379. 2  | 0. 220087  | coding    |
| MSTRG. 24380. 1  | 0. 928947  | coding    |
| MSTRG. 24359. 2  | 1. 09434   | coding    |
| MSTRG. 24359. 3  | 0. 80525   | coding    |
| MSTRG. 24361. 2  | 1. 73641   | coding    |
| MSTRG. 24382. 5  | 2. 31191   | coding    |
| MSTRG. 24387. 6  | -0. 897374 | noncoding |
| MSTRG. 24387. 1  | -1. 03166  | noncoding |
| MSTRG. 24387. 3  | -0. 33485  | noncoding |
| MSTRG. 24387. 4  | -1. 60251  | noncoding |
| MSTRG. 24389. 1  | -0. 900712 | noncoding |
| MSTRG. 24387. 7  | -0. 930422 | noncoding |
| MSTRG. 24390. 8  | 3. 06049   | coding    |
| MSTRG. 24384. 3  | 2. 39231   | coding    |
| MSTRG. 24384. 2  | 2. 20606   | coding    |
| MSTRG. 24397. 1  | -0. 948221 | noncoding |
| MSTRG. 24398. 1  | -1. 75044  | noncoding |
| MSTRG. 24397. 3  | -0. 704319 | noncoding |
| MSTRG. 24398. 4  | -1. 14538  | noncoding |
| MSTRG. 24400. 1  | 1. 01788   | coding    |
| MSTRG. 24405. 1  | 0. 077205  | coding    |
| MSTRG. 24405. 3  | -0. 204266 | noncoding |
| MSTRG. 24405. 4  | -0. 151344 | noncoding |
| MSTRG. 24406. 3  | 0. 312641  | coding    |
| MSTRG. 24408. 1  | -1. 38163  | noncoding |
| MSTRG. 24408. 2  | -1. 77396  | noncoding |
| MSTRG. 24410. 3  | 1. 03002   | coding    |
| MSTRG. 24412. 1  | 3. 48506   | coding    |
| MSTRG. 24412. 2  | 3. 42733   | coding    |
| MSTRG. 24413. 1  | -0. 355054 | noncoding |
| MSTRG. 24401. 1  | 0. 20324   | coding    |
| MSTRG. 24404. 2  | 0. 556337  | coding    |
| MSTRG. 24415. 7  | 0. 118074  | coding    |

|                  |            |           |
|------------------|------------|-----------|
| MSTRG. 24415. 3  | 0. 163071  | coding    |
| MSTRG. 24415. 5  | 0. 071566  | coding    |
| MSTRG. 24415. 4  | 0. 163493  | coding    |
| MSTRG. 24415. 6  | 0. 425424  | coding    |
| MSTRG. 24415. 2  | 0. 774812  | coding    |
| MSTRG. 24417. 1  | 0. 74379   | coding    |
| MSTRG. 24417. 6  | 0. 451216  | coding    |
| MSTRG. 24417. 5  | 0. 639413  | coding    |
| MSTRG. 24419. 1  | 0. 683289  | coding    |
| MSTRG. 24419. 2  | -0. 408147 | noncoding |
| MSTRG. 24420. 1  | -0. 592249 | noncoding |
| MSTRG. 24421. 1  | -1. 41257  | noncoding |
| MSTRG. 24424. 2  | 1. 2046    | coding    |
| MSTRG. 24436. 1  | 1. 26319   | coding    |
| MSTRG. 24442. 2  | 2. 89766   | coding    |
| MSTRG. 24443. 1  | 1. 545     | coding    |
| MSTRG. 24429. 7  | -0. 990845 | noncoding |
| MSTRG. 24429. 5  | -1. 74801  | noncoding |
| MSTRG. 24429. 6  | -1. 55852  | noncoding |
| MSTRG. 24429. 1  | -1. 74467  | noncoding |
| MSTRG. 24429. 2  | -1. 4401   | noncoding |
| MSTRG. 24429. 3  | -1. 54769  | noncoding |
| MSTRG. 24429. 4  | -1. 80355  | noncoding |
| MSTRG. 24429. 8  | -1. 96594  | noncoding |
| MSTRG. 24454. 1  | -0. 313692 | noncoding |
| MSTRG. 24456. 2  | 1. 61745   | coding    |
| MSTRG. 24458. 1  | -2. 53829  | noncoding |
| MSTRG. 24460. 1  | -0. 346998 | noncoding |
| MSTRG. 24460. 2  | -0. 367414 | noncoding |
| MSTRG. 24460. 3  | -0. 144781 | noncoding |
| MSTRG. 24460. 4  | 0. 077588  | coding    |
| MSTRG. 24460. 5  | 0. 392645  | coding    |
| MSTRG. 24460. 6  | -0. 044847 | noncoding |
| MSTRG. 24461. 1  | -1. 57924  | noncoding |
| MSTRG. 24462. 1  | -0. 878396 | noncoding |
| MSTRG. 24464. 3  | 2. 06561   | coding    |
| MSTRG. 24464. 2  | 2. 01599   | coding    |
| MSTRG. 24464. 1  | 1. 7937    | coding    |
| MSTRG. 24465. 1  | 0. 498474  | coding    |
| MSTRG. 24463. 1  | 1. 90394   | coding    |
| MSTRG. 24468. 1  | 2. 13073   | coding    |
| MSTRG. 24468. 2  | 1. 7563    | coding    |
| MSTRG. 24484. 2  | -0. 334351 | noncoding |
| MSTRG. 24484. 3  | -0. 196905 | noncoding |
| MSTRG. 24484. 4  | -0. 226641 | noncoding |
| MSTRG. 24484. 5  | -0. 314005 | noncoding |
| MSTRG. 24484. 6  | 0. 191837  | coding    |
| MSTRG. 24484. 7  | -0. 250159 | noncoding |
| MSTRG. 24485. 3  | -0. 101939 | noncoding |
| MSTRG. 24485. 2  | -0. 533566 | noncoding |
| MSTRG. 24486. 1  | 0. 710506  | coding    |
| MSTRG. 24487. 10 | 2. 11773   | coding    |
| MSTRG. 24487. 3  | 2. 06156   | coding    |
| MSTRG. 24487. 4  | 2. 08227   | coding    |



|                  |            |           |
|------------------|------------|-----------|
| MSTRG. 24487. 5  | 2. 07435   | coding    |
| MSTRG. 24487. 6  | 2. 04575   | coding    |
| MSTRG. 24487. 7  | 2. 03707   | coding    |
| MSTRG. 24487. 9  | 2. 1031    | coding    |
| MSTRG. 24487. 8  | 1. 94173   | coding    |
| MSTRG. 24487. 11 | 1. 92954   | coding    |
| MSTRG. 24487. 17 | 2. 09414   | coding    |
| MSTRG. 24487. 18 | 2. 09855   | coding    |
| MSTRG. 24487. 19 | 2. 07907   | coding    |
| MSTRG. 24488. 7  | 0. 846717  | coding    |
| MSTRG. 24488. 10 | 0. 446756  | coding    |
| MSTRG. 24488. 8  | 1. 16786   | coding    |
| MSTRG. 24488. 14 | -2. 31614  | noncoding |
| MSTRG. 24489. 2  | -1. 02613  | noncoding |
| MSTRG. 24472. 3  | 1. 61939   | coding    |
| MSTRG. 24472. 5  | 1. 80344   | coding    |
| MSTRG. 24477. 1  | 1. 34536   | coding    |
| MSTRG. 24477. 10 | 1. 47014   | coding    |
| MSTRG. 24477. 8  | 1. 652     | coding    |
| MSTRG. 24477. 7  | 1. 1971    | coding    |
| MSTRG. 24477. 9  | 1. 23008   | coding    |
| MSTRG. 24478. 1  | 1. 16168   | coding    |
| MSTRG. 24495. 3  | 2. 47614   | coding    |
| MSTRG. 24510. 1  | 2. 51475   | coding    |
| MSTRG. 24503. 1  | -0. 385254 | noncoding |
| MSTRG. 24504. 1  | -1. 32368  | noncoding |
| MSTRG. 24514. 2  | 0. 108695  | coding    |
| MSTRG. 24516. 2  | -1. 60317  | noncoding |
| MSTRG. 24521. 6  | 0. 96536   | coding    |
| MSTRG. 24523. 3  | 1. 73301   | coding    |
| MSTRG. 24523. 4  | 0. 460764  | coding    |
| MSTRG. 24520. 2  | 1. 8071    | coding    |
| MSTRG. 24520. 3  | 1. 57508   | coding    |
| MSTRG. 24520. 4  | 1. 31562   | coding    |
| MSTRG. 24520. 6  | 1. 67517   | coding    |
| MSTRG. 24528. 4  | -0. 168079 | noncoding |
| MSTRG. 24528. 3  | 0. 02133   | coding    |
| MSTRG. 24528. 2  | 0. 155595  | coding    |
| MSTRG. 24528. 5  | 0. 555558  | coding    |
| MSTRG. 24528. 6  | -0. 153987 | noncoding |
| MSTRG. 24531. 2  | -0. 017114 | noncoding |
| MSTRG. 24539. 3  | 0. 293551  | coding    |
| MSTRG. 24539. 4  | 1. 5078    | coding    |
| MSTRG. 24541. 2  | 1. 49905   | coding    |
| MSTRG. 24543. 1  | 0. 266445  | coding    |
| MSTRG. 24548. 1  | 0. 271944  | coding    |
| MSTRG. 24548. 3  | 0. 204432  | coding    |
| MSTRG. 24554. 1  | 2. 66562   | coding    |
| MSTRG. 24554. 4  | 0. 972257  | coding    |
| MSTRG. 24554. 7  | 1. 38626   | coding    |
| MSTRG. 24554. 9  | 1. 73649   | coding    |
| MSTRG. 24555. 1  | -2. 0155   | noncoding |
| MSTRG. 24553. 1  | 1. 7592    | coding    |
| MSTRG. 24557. 1  | 1. 73841   | coding    |

|                  |            |           |
|------------------|------------|-----------|
| MSTRG. 24557. 3  | 1. 65484   | coding    |
| MSTRG. 24557. 4  | 1. 40447   | coding    |
| MSTRG. 24557. 5  | 0. 715898  | coding    |
| MSTRG. 24566. 2  | 1. 83628   | coding    |
| MSTRG. 24566. 3  | 1. 65381   | coding    |
| MSTRG. 24568. 2  | 0. 366604  | coding    |
| MSTRG. 24571. 1  | 2. 27512   | coding    |
| MSTRG. 24574. 4  | -0. 330933 | noncoding |
| MSTRG. 24574. 5  | -0. 019448 | noncoding |
| MSTRG. 24574. 3  | -0. 663292 | noncoding |
| MSTRG. 24574. 2  | -0. 781095 | noncoding |
| MSTRG. 24574. 6  | -0. 161145 | noncoding |
| MSTRG. 24575. 1  | -1. 02169  | noncoding |
| MSTRG. 24580. 2  | 0. 325855  | coding    |
| MSTRG. 24584. 2  | 1. 7369    | coding    |
| MSTRG. 24584. 3  | 1. 38591   | coding    |
| MSTRG. 24585. 2  | -0. 067627 | noncoding |
| MSTRG. 24586. 1  | 0. 939291  | coding    |
| MSTRG. 24588. 3  | -0. 010841 | noncoding |
| MSTRG. 24589. 5  | 0. 367394  | coding    |
| MSTRG. 24589. 6  | 0. 185335  | coding    |
| MSTRG. 24589. 4  | 0. 887084  | coding    |
| MSTRG. 24589. 7  | 0. 698007  | coding    |
| MSTRG. 24591. 10 | 1. 95028   | coding    |
| MSTRG. 24591. 3  | 2. 02563   | coding    |
| MSTRG. 24591. 4  | 1. 83192   | coding    |
| MSTRG. 24591. 5  | 1. 72591   | coding    |
| MSTRG. 24591. 6  | 1. 64257   | coding    |
| MSTRG. 24591. 7  | 1. 91389   | coding    |
| MSTRG. 24591. 8  | 2. 06821   | coding    |
| MSTRG. 24591. 9  | 2. 11166   | coding    |
| MSTRG. 24594. 1  | 0. 295686  | coding    |
| MSTRG. 24594. 2  | 0. 711746  | coding    |
| MSTRG. 24595. 3  | 1. 34587   | coding    |
| MSTRG. 24595. 4  | 2. 14573   | coding    |
| MSTRG. 24597. 2  | 1. 50838   | coding    |
| MSTRG. 24599. 3  | 0. 918459  | coding    |
| MSTRG. 24599. 4  | 0. 798597  | coding    |
| MSTRG. 24599. 5  | 0. 860416  | coding    |
| MSTRG. 24604. 2  | -0. 025076 | noncoding |
| MSTRG. 24604. 1  | 0. 054454  | coding    |
| MSTRG. 24604. 3  | 0. 215498  | coding    |
| MSTRG. 24602. 1  | -1. 83303  | noncoding |
| MSTRG. 24609. 7  | 1. 49859   | coding    |
| MSTRG. 24619. 1  | -2. 0361   | noncoding |
| MSTRG. 24620. 2  | 2. 72164   | coding    |
| MSTRG. 24620. 3  | 2. 49503   | coding    |
| MSTRG. 24620. 4  | 2. 57849   | coding    |
| MSTRG. 24620. 5  | 1. 59912   | coding    |
| MSTRG. 24621. 1  | 0. 219701  | coding    |
| MSTRG. 24623. 3  | 2. 2513    | coding    |
| MSTRG. 24625. 4  | 1. 44544   | coding    |
| MSTRG. 24625. 5  | 1. 41424   | coding    |
| MSTRG. 24629. 1  | 1. 60104   | coding    |

|                 |            |           |
|-----------------|------------|-----------|
| MSTRG. 24629. 3 | 1. 4632    | coding    |
| MSTRG. 24630. 1 | 1. 55162   | coding    |
| MSTRG. 24633. 1 | -1. 48095  | noncoding |
| MSTRG. 24637. 1 | 1. 3122    | coding    |
| MSTRG. 24637. 3 | 0. 919462  | coding    |
| MSTRG. 24637. 2 | 1. 01815   | coding    |
| MSTRG. 24637. 4 | 1. 39141   | coding    |
| MSTRG. 24640. 2 | 0. 025405  | coding    |
| MSTRG. 24648. 1 | -0. 755886 | noncoding |
| MSTRG. 24649. 1 | -1. 42496  | noncoding |
| MSTRG. 24651. 1 | 0. 534205  | coding    |
| MSTRG. 24651. 2 | 0. 67444   | coding    |
| MSTRG. 24642. 6 | 1. 65249   | coding    |
| MSTRG. 24642. 7 | 1. 78193   | coding    |
| MSTRG. 24644. 1 | 2. 58504   | coding    |
| MSTRG. 24656. 3 | 1. 04837   | coding    |
| MSTRG. 24659. 3 | 0. 573282  | coding    |
| MSTRG. 24659. 4 | 0. 321742  | coding    |
| MSTRG. 24662. 2 | 2. 43363   | coding    |
| MSTRG. 24663. 2 | 1. 20207   | coding    |
| MSTRG. 24664. 2 | 1. 77398   | coding    |
| MSTRG. 24666. 3 | 0. 658998  | coding    |
| MSTRG. 24661. 3 | 1. 21186   | coding    |
| MSTRG. 24661. 4 | 1. 20951   | coding    |
| MSTRG. 24670. 1 | -0. 818903 | noncoding |
| MSTRG. 24669. 3 | 2. 23066   | coding    |
| MSTRG. 24669. 6 | -0. 035406 | noncoding |
| MSTRG. 24673. 2 | 2. 53217   | coding    |
| MSTRG. 24672. 1 | -1. 37304  | noncoding |
| MSTRG. 24676. 1 | -1. 149    | noncoding |
| MSTRG. 24676. 2 | -1. 10998  | noncoding |
| MSTRG. 24677. 1 | -0. 933052 | noncoding |
| MSTRG. 24693. 3 | 1. 89862   | coding    |
| MSTRG. 24696. 1 | -0. 143224 | noncoding |
| MSTRG. 24696. 2 | 0. 788787  | coding    |
| MSTRG. 24697. 2 | 2. 63861   | coding    |
| MSTRG. 24697. 5 | 2. 40801   | coding    |
| MSTRG. 24724. 1 | 0. 368886  | coding    |
| MSTRG. 24724. 6 | 0. 735161  | coding    |
| MSTRG. 24724. 5 | 0. 725699  | coding    |
| MSTRG. 24724. 7 | 0. 755389  | coding    |
| MSTRG. 24724. 2 | 0. 800171  | coding    |
| MSTRG. 24724. 3 | 0. 777393  | coding    |
| MSTRG. 24724. 4 | 1. 41854   | coding    |
| MSTRG. 24725. 1 | 1. 17683   | coding    |
| MSTRG. 24725. 2 | 1. 08908   | coding    |
| MSTRG. 24725. 3 | 1. 04354   | coding    |
| MSTRG. 24725. 4 | 2. 29889   | coding    |
| MSTRG. 24725. 5 | 1. 21342   | coding    |
| MSTRG. 24729. 1 | 1. 35051   | coding    |
| MSTRG. 24729. 2 | 1. 39848   | coding    |
| MSTRG. 24729. 3 | 1. 03236   | coding    |
| MSTRG. 24729. 4 | 1. 18282   | coding    |
| MSTRG. 24729. 5 | 1. 03868   | coding    |

|                |           |           |
|----------------|-----------|-----------|
| MSTRG. 24729.6 | 1.37244   | coding    |
| MSTRG. 24732.1 | 1.90018   | coding    |
| MSTRG. 24732.2 | 1.88173   | coding    |
| MSTRG. 24732.4 | 1.11676   | coding    |
| MSTRG. 24735.4 | 2.12106   | coding    |
| MSTRG. 24710.4 | 1.91406   | coding    |
| MSTRG. 24710.5 | 2.16483   | coding    |
| MSTRG. 24706.1 | 0.927312  | coding    |
| MSTRG. 24711.3 | 1.97189   | coding    |
| MSTRG. 24711.4 | 1.97183   | coding    |
| MSTRG. 24717.2 | -0.99759  | noncoding |
| MSTRG. 24721.1 | 1.60528   | coding    |
| MSTRG. 24721.2 | 0.58987   | coding    |
| MSTRG. 24721.4 | 0.334933  | coding    |
| MSTRG. 24722.2 | 2.62469   | coding    |
| MSTRG. 24722.4 | 2.24644   | coding    |
| MSTRG. 24714.2 | 1.28783   | coding    |
| MSTRG. 24715.2 | 0.987335  | coding    |
| MSTRG. 24741.2 | 1.17717   | coding    |
| MSTRG. 24742.3 | 1.08775   | coding    |
| MSTRG. 24743.2 | 0.656679  | coding    |
| MSTRG. 24743.3 | 0.648847  | coding    |
| MSTRG. 24745.1 | -0.331638 | noncoding |
| MSTRG. 24745.2 | -0.370295 | noncoding |
| MSTRG. 24745.3 | -0.923487 | noncoding |
| MSTRG. 24748.1 | 0.084895  | coding    |
| MSTRG. 24763.1 | 0.908336  | coding    |
| MSTRG. 24763.3 | 1.18943   | coding    |
| MSTRG. 24768.3 | 1.26415   | coding    |
| MSTRG. 24768.7 | 1.2806    | coding    |
| MSTRG. 24769.1 | -1.21455  | noncoding |
| MSTRG. 24772.2 | 1.34992   | coding    |
| MSTRG. 24774.5 | 2.78986   | coding    |
| MSTRG. 24774.6 | 2.92718   | coding    |
| MSTRG. 24784.2 | 1.53411   | coding    |
| MSTRG. 24784.3 | 1.66782   | coding    |
| MSTRG. 24785.3 | 1.82379   | coding    |
| MSTRG. 24788.1 | -1.51878  | noncoding |
| MSTRG. 24789.1 | -0.959546 | noncoding |
| MSTRG. 24792.2 | 1.00229   | coding    |
| MSTRG. 24793.1 | -1.92395  | noncoding |
| MSTRG. 24793.2 | -1.69899  | noncoding |
| MSTRG. 24778.1 | 0.609742  | coding    |
| MSTRG. 24782.1 | 2.09037   | coding    |
| MSTRG. 24795.2 | 1.13104   | coding    |
| MSTRG. 24801.1 | 1.08808   | coding    |
| MSTRG. 24801.2 | 0.927104  | coding    |
| MSTRG. 24805.2 | 0.282571  | coding    |
| MSTRG. 24807.1 | -1.47541  | noncoding |
| MSTRG. 24809.1 | 1.7878    | coding    |
| MSTRG. 24810.1 | -1.0289   | noncoding |
| MSTRG. 24814.1 | 1.30161   | coding    |
| MSTRG. 24815.2 | 0.30864   | coding    |
| MSTRG. 24816.1 | -0.812105 | noncoding |

|                  |            |           |
|------------------|------------|-----------|
| MSTRG. 24816. 2  | -1. 91543  | noncoding |
| MSTRG. 24817. 1  | 1. 23261   | coding    |
| MSTRG. 24817. 2  | 0. 357149  | coding    |
| MSTRG. 24820. 2  | 1. 30483   | coding    |
| MSTRG. 24821. 1  | -1. 53144  | noncoding |
| MSTRG. 24825. 1  | -1. 54676  | noncoding |
| MSTRG. 24826. 4  | 1. 8178    | coding    |
| MSTRG. 24826. 6  | 1. 92791   | coding    |
| MSTRG. 24826. 2  | 1. 91626   | coding    |
| MSTRG. 24826. 3  | 1. 76304   | coding    |
| MSTRG. 24826. 5  | 1. 8866    | coding    |
| MSTRG. 24826. 7  | 1. 93728   | coding    |
| MSTRG. 24826. 8  | 1. 16896   | coding    |
| MSTRG. 24827. 6  | 1. 23569   | coding    |
| MSTRG. 24827. 7  | 0. 456086  | coding    |
| MSTRG. 24827. 8  | 0. 339834  | coding    |
| MSTRG. 24827. 9  | 0. 298023  | coding    |
| MSTRG. 24827. 10 | 0. 012287  | coding    |
| MSTRG. 24827. 11 | 0. 437433  | coding    |
| MSTRG. 24828. 1  | -0. 308989 | noncoding |
| MSTRG. 24830. 1  | -2. 02749  | noncoding |
| MSTRG. 24833. 1  | -0. 5237   | noncoding |
| MSTRG. 24835. 1  | 1. 15948   | coding    |
| MSTRG. 24836. 1  | -1. 49117  | noncoding |
| MSTRG. 24837. 1  | 1. 8324    | coding    |
| MSTRG. 24837. 2  | 0. 71955   | coding    |
| MSTRG. 24837. 3  | 1. 18343   | coding    |
| MSTRG. 24837. 4  | 1. 17832   | coding    |
| MSTRG. 24837. 5  | 1. 18243   | coding    |
| MSTRG. 24841. 2  | 1. 03632   | coding    |
| MSTRG. 24841. 1  | 1. 09066   | coding    |
| MSTRG. 24834. 3  | 1. 49784   | coding    |
| MSTRG. 24844. 1  | 1. 43912   | coding    |
| MSTRG. 24844. 2  | 1. 51539   | coding    |
| MSTRG. 24844. 3  | 1. 76987   | coding    |
| MSTRG. 24844. 8  | 1. 55011   | coding    |
| MSTRG. 24844. 9  | 1. 58754   | coding    |
| MSTRG. 24844. 10 | 1. 20522   | coding    |
| MSTRG. 24846. 1  | -1. 81343  | noncoding |
| MSTRG. 24847. 1  | -2. 29809  | noncoding |
| MSTRG. 24842. 4  | -0. 283556 | noncoding |
| MSTRG. 24850. 1  | 0. 476986  | coding    |
| MSTRG. 24849. 3  | 0. 178111  | coding    |
| MSTRG. 24849. 2  | 1. 49259   | coding    |
| MSTRG. 24852. 1  | 0. 410492  | coding    |
| MSTRG. 24853. 1  | -0. 256798 | noncoding |
| MSTRG. 24854. 1  | 0. 188875  | coding    |
| MSTRG. 24855. 1  | -0. 663891 | noncoding |
| MSTRG. 24856. 1  | -1. 28404  | noncoding |
| MSTRG. 24858. 2  | 2. 05971   | coding    |
| MSTRG. 24858. 3  | 2. 11553   | coding    |
| MSTRG. 24858. 4  | 0. 598976  | coding    |
| MSTRG. 24860. 3  | 1. 91503   | coding    |
| MSTRG. 24861. 2  | 2. 03414   | coding    |

|                 |           |           |
|-----------------|-----------|-----------|
| MSTRG. 24861.3  | 1.93336   | coding    |
| MSTRG. 24861.4  | 2.03399   | coding    |
| MSTRG. 24861.5  | 2.04728   | coding    |
| MSTRG. 24862.1  | 1.6051    | coding    |
| MSTRG. 24866.1  | 3.02678   | coding    |
| MSTRG. 24866.2  | 3.01533   | coding    |
| MSTRG. 24866.3  | 3.06692   | coding    |
| MSTRG. 24866.7  | 2.13797   | coding    |
| MSTRG. 24867.2  | 0.005783  | coding    |
| MSTRG. 24867.4  | 0.354799  | coding    |
| MSTRG. 24867.3  | 1.39142   | coding    |
| MSTRG. 24867.5  | 1.25616   | coding    |
| MSTRG. 24867.11 | 0.849342  | coding    |
| MSTRG. 24867.7  | 0.773377  | coding    |
| MSTRG. 24867.8  | 0.882973  | coding    |
| MSTRG. 24878.1  | 1.85238   | coding    |
| MSTRG. 24879.2  | 1.01006   | coding    |
| MSTRG. 24864.1  | 3.04297   | coding    |
| MSTRG. 24865.1  | -1.13612  | noncoding |
| MSTRG. 24865.2  | -1.1934   | noncoding |
| MSTRG. 24869.2  | -0.861894 | noncoding |
| MSTRG. 24869.4  | 0.376078  | coding    |
| MSTRG. 24869.3  | -0.740227 | noncoding |
| MSTRG. 24871.2  | 2.66412   | coding    |
| MSTRG. 24890.1  | 1.07338   | coding    |
| MSTRG. 24892.1  | 2.46272   | coding    |
| MSTRG. 24892.3  | -0.354561 | noncoding |
| MSTRG. 24892.4  | 0.334349  | coding    |
| MSTRG. 24892.5  | 2.41756   | coding    |
| MSTRG. 24892.6  | 1.58475   | coding    |
| MSTRG. 24893.3  | 1.78823   | coding    |
| MSTRG. 24885.7  | 2.39483   | coding    |
| MSTRG. 24885.6  | 2.48063   | coding    |
| MSTRG. 24885.5  | 2.84747   | coding    |
| MSTRG. 24885.3  | 2.86581   | coding    |
| MSTRG. 24885.10 | 1.06776   | coding    |
| MSTRG. 24885.11 | 1.65998   | coding    |
| MSTRG. 24885.8  | 1.95182   | coding    |
| MSTRG. 24885.9  | 2.22185   | coding    |
| MSTRG. 24898.1  | 0.99339   | coding    |
| MSTRG. 24898.2  | 0.728368  | coding    |
| MSTRG. 24898.3  | 1.4909    | coding    |
| MSTRG. 24898.4  | 1.47573   | coding    |
| MSTRG. 24898.5  | 0.776295  | coding    |
| MSTRG. 24898.6  | 0.687455  | coding    |
| MSTRG. 24903.1  | -1.45747  | noncoding |
| MSTRG. 24913.2  | 1.28012   | coding    |
| MSTRG. 24914.2  | -0.593961 | noncoding |
| MSTRG. 24911.4  | -0.1434   | noncoding |
| MSTRG. 24920.1  | -0.68575  | noncoding |
| MSTRG. 24922.1  | -2.3963   | noncoding |
| MSTRG. 24924.2  | 1.5233    | coding    |
| MSTRG. 24925.1  | 0.427414  | coding    |
| MSTRG. 24925.2  | -0.072911 | noncoding |

|                  |            |           |
|------------------|------------|-----------|
| MSTRG. 24930. 1  | -1. 01614  | noncoding |
| MSTRG. 24932. 1  | -1. 83748  | noncoding |
| MSTRG. 24936. 1  | 0. 692174  | coding    |
| MSTRG. 24936. 5  | 0. 998633  | coding    |
| MSTRG. 24936. 4  | 0. 980394  | coding    |
| MSTRG. 24936. 7  | 0. 589891  | coding    |
| MSTRG. 24958. 2  | 1. 45271   | coding    |
| MSTRG. 24958. 1  | 1. 36018   | coding    |
| MSTRG. 24959. 1  | 1. 6444    | coding    |
| MSTRG. 24959. 2  | 1. 64876   | coding    |
| MSTRG. 24960. 1  | 1. 82447   | coding    |
| MSTRG. 24960. 2  | 0. 927265  | coding    |
| MSTRG. 24960. 4  | 1. 65724   | coding    |
| MSTRG. 24960. 5  | 1. 29773   | coding    |
| MSTRG. 24961. 1  | -2. 48144  | noncoding |
| MSTRG. 24962. 2  | 1. 072     | coding    |
| MSTRG. 24963. 1  | -0. 456243 | noncoding |
| MSTRG. 24969. 4  | -0. 670435 | noncoding |
| MSTRG. 24971. 1  | -0. 355676 | noncoding |
| MSTRG. 24971. 2  | 0. 004024  | coding    |
| MSTRG. 24971. 3  | -0. 017016 | noncoding |
| MSTRG. 24971. 4  | 0. 677602  | coding    |
| MSTRG. 24960. 6  | 2. 01867   | coding    |
| MSTRG. 24960. 7  | 1. 90102   | coding    |
| MSTRG. 24944. 2  | -0. 790827 | noncoding |
| MSTRG. 24946. 4  | 0. 847119  | coding    |
| MSTRG. 24946. 3  | 0. 784107  | coding    |
| MSTRG. 24946. 5  | 1. 02627   | coding    |
| MSTRG. 24948. 2  | 0. 505192  | coding    |
| MSTRG. 24954. 3  | 0. 932399  | coding    |
| MSTRG. 24954. 6  | 0. 818789  | coding    |
| MSTRG. 24976. 3  | 0. 954697  | coding    |
| MSTRG. 24976. 2  | 2. 41948   | coding    |
| MSTRG. 24976. 4  | 0. 075227  | coding    |
| MSTRG. 25009. 1  | 0. 082169  | coding    |
| MSTRG. 25010. 1  | 1. 27317   | coding    |
| MSTRG. 25010. 8  | 1. 82973   | coding    |
| MSTRG. 25010. 10 | 2. 20292   | coding    |
| MSTRG. 25010. 11 | 2. 23314   | coding    |
| MSTRG. 25010. 12 | 2. 26677   | coding    |
| MSTRG. 25010. 13 | 2. 11661   | coding    |
| MSTRG. 25010. 6  | 0. 987379  | coding    |
| MSTRG. 25010. 4  | 1. 31343   | coding    |
| MSTRG. 25010. 7  | 1. 56686   | coding    |
| MSTRG. 25010. 3  | 2. 0437    | coding    |
| MSTRG. 25010. 5  | 2. 27552   | coding    |
| MSTRG. 25012. 1  | -1. 37611  | noncoding |
| MSTRG. 25010. 15 | 2. 33973   | coding    |
| MSTRG. 25010. 16 | 2. 44866   | coding    |
| MSTRG. 24992. 2  | 1. 80757   | coding    |
| MSTRG. 24993. 1  | 2. 22368   | coding    |
| MSTRG. 24993. 3  | 2. 19028   | coding    |
| MSTRG. 24993. 4  | 2. 15774   | coding    |
| MSTRG. 24993. 5  | 2. 15566   | coding    |

|                 |            |           |
|-----------------|------------|-----------|
| MSTRG. 24986. 1 | 1. 42384   | coding    |
| MSTRG. 24996. 1 | -0. 55369  | noncoding |
| MSTRG. 25001. 2 | 1. 39579   | coding    |
| MSTRG. 25001. 4 | 1. 75615   | coding    |
| MSTRG. 25003. 2 | 0. 725621  | coding    |
| MSTRG. 25006. 1 | 1. 60407   | coding    |
| MSTRG. 25006. 3 | 0. 325194  | coding    |
| MSTRG. 25020. 1 | 1. 55983   | coding    |
| MSTRG. 25020. 4 | 1. 53026   | coding    |
| MSTRG. 25020. 5 | 1. 24905   | coding    |
| MSTRG. 25021. 1 | 3. 13868   | coding    |
| MSTRG. 25021. 2 | 3. 05236   | coding    |
| MSTRG. 25021. 3 | 3. 21123   | coding    |
| MSTRG. 25027. 4 | 0. 826809  | coding    |
| MSTRG. 25027. 7 | 1. 88997   | coding    |
| MSTRG. 25027. 9 | 1. 65557   | coding    |
| MSTRG. 25027. 8 | 1. 65197   | coding    |
| MSTRG. 25028. 2 | 2. 04231   | coding    |
| MSTRG. 25029. 1 | -1. 76154  | noncoding |
| MSTRG. 25031. 2 | -1. 36659  | noncoding |
| MSTRG. 25031. 3 | -1. 51024  | noncoding |
| MSTRG. 25031. 1 | -0. 871506 | noncoding |
| MSTRG. 25031. 4 | -1. 59491  | noncoding |
| MSTRG. 25033. 2 | 0. 898531  | coding    |
| MSTRG. 25032. 4 | 0. 601866  | coding    |
| MSTRG. 25039. 3 | 1. 46234   | coding    |
| MSTRG. 25041. 2 | 0. 109219  | coding    |
| MSTRG. 25038. 1 | -1. 83299  | noncoding |
| MSTRG. 25042. 1 | 0. 045888  | coding    |
| MSTRG. 25045. 3 | 0. 390017  | coding    |
| MSTRG. 25049. 1 | -1. 45122  | noncoding |
| MSTRG. 25050. 2 | 0. 879428  | coding    |
| MSTRG. 25050. 4 | 0. 889204  | coding    |
| MSTRG. 25050. 5 | 0. 740875  | coding    |
| MSTRG. 25051. 3 | -0. 016289 | noncoding |
| MSTRG. 25051. 4 | -0. 144919 | noncoding |
| MSTRG. 25051. 6 | -0. 622608 | noncoding |
| MSTRG. 25053. 6 | 2. 01222   | coding    |
| MSTRG. 25058. 1 | 1. 31167   | coding    |
| MSTRG. 25058. 3 | 0. 980733  | coding    |
| MSTRG. 25059. 1 | 1. 30778   | coding    |
| MSTRG. 25055. 1 | -0. 678344 | noncoding |
| MSTRG. 25056. 1 | 1. 74605   | coding    |
| MSTRG. 25060. 3 | 0. 841245  | coding    |
| MSTRG. 25063. 2 | 1. 55976   | coding    |
| MSTRG. 25063. 1 | 1. 82868   | coding    |
| MSTRG. 25064. 2 | 0. 870505  | coding    |
| MSTRG. 25067. 2 | -0. 550933 | noncoding |
| MSTRG. 25067. 3 | -1. 00574  | noncoding |
| MSTRG. 25070. 1 | -0. 49732  | noncoding |
| MSTRG. 25070. 2 | -0. 640636 | noncoding |
| MSTRG. 25070. 4 | -0. 623354 | noncoding |
| MSTRG. 25072. 4 | 2. 18704   | coding    |
| MSTRG. 25072. 3 | 1. 99598   | coding    |



|                 |            |           |
|-----------------|------------|-----------|
| MSTRG. 25074. 2 | 2. 30869   | coding    |
| MSTRG. 25074. 3 | 2. 44248   | coding    |
| MSTRG. 25071. 3 | -0. 164561 | noncoding |
| MSTRG. 25078. 3 | 2. 39424   | coding    |
| MSTRG. 25079. 3 | 0. 922836  | coding    |
| MSTRG. 25079. 2 | 0. 791185  | coding    |
| MSTRG. 25078. 4 | 1. 6781    | coding    |
| MSTRG. 25080. 2 | 1. 80676   | coding    |
| MSTRG. 25076. 2 | -0. 411382 | noncoding |
| MSTRG. 25076. 3 | -0. 037119 | noncoding |
| MSTRG. 25085. 2 | 1. 00752   | coding    |
| MSTRG. 25085. 3 | 1. 26369   | coding    |
| MSTRG. 25081. 1 | 0. 975977  | coding    |
| MSTRG. 25090. 3 | 0. 600921  | coding    |
| MSTRG. 25108. 4 | 0. 873069  | coding    |
| MSTRG. 25108. 7 | 0. 622746  | coding    |
| MSTRG. 25109. 1 | -0. 992648 | noncoding |
| MSTRG. 25110. 1 | 1. 40626   | coding    |
| MSTRG. 25103. 2 | 1. 13526   | coding    |
| MSTRG. 25103. 3 | 1. 27314   | coding    |
| MSTRG. 25103. 5 | 1. 15801   | coding    |
| MSTRG. 25103. 4 | 1. 04023   | coding    |
| MSTRG. 25103. 6 | 0. 148785  | coding    |
| MSTRG. 25105. 1 | -0. 243078 | noncoding |
| MSTRG. 25104. 1 | -2. 79316  | noncoding |
| MSTRG. 25107. 1 | -1. 4478   | noncoding |
| MSTRG. 25116. 1 | 1. 1612    | coding    |
| MSTRG. 25116. 3 | 1. 02755   | coding    |
| MSTRG. 25115. 1 | -1. 62047  | noncoding |
| MSTRG. 25118. 2 | 1. 59563   | coding    |
| MSTRG. 25120. 1 | 0. 245801  | coding    |
| MSTRG. 25123. 1 | 0. 055636  | coding    |
| MSTRG. 25124. 1 | 2. 62806   | coding    |
| MSTRG. 25124. 2 | 1. 97926   | coding    |
| MSTRG. 25125. 1 | -0. 682989 | noncoding |
| MSTRG. 25143. 1 | 0. 744197  | coding    |
| MSTRG. 25143. 2 | 0. 489135  | coding    |
| MSTRG. 25143. 3 | 0. 642569  | coding    |
| MSTRG. 25128. 1 | -0. 184742 | noncoding |
| MSTRG. 25138. 1 | -1. 18372  | noncoding |
| MSTRG. 25139. 1 | -1. 91764  | noncoding |
| MSTRG. 25150. 4 | 1. 2339    | coding    |
| MSTRG. 25166. 1 | -1. 13033  | noncoding |
| MSTRG. 25167. 1 | 2. 06997   | coding    |
| MSTRG. 25167. 3 | 2. 12235   | coding    |
| MSTRG. 25168. 1 | 1. 69182   | coding    |
| MSTRG. 25164. 2 | 0. 075463  | coding    |
| MSTRG. 25164. 1 | -0. 497118 | noncoding |
| MSTRG. 25164. 4 | 0. 514172  | coding    |
| MSTRG. 25170. 1 | -0. 577927 | noncoding |
| MSTRG. 25174. 2 | 0. 126742  | coding    |
| MSTRG. 25174. 3 | -0. 661692 | noncoding |
| MSTRG. 25176. 4 | 0. 896811  | coding    |
| MSTRG. 25176. 5 | 0. 938956  | coding    |

|                |           |           |
|----------------|-----------|-----------|
| MSTRG. 25181.1 | 0.299628  | coding    |
| MSTRG. 25185.1 | 0.42138   | coding    |
| MSTRG. 25195.1 | 0.375867  | coding    |
| MSTRG. 25195.2 | -0.03277  | noncoding |
| MSTRG. 25196.3 | 1.65348   | coding    |
| MSTRG. 25196.4 | 2.09637   | coding    |
| MSTRG. 25196.5 | 0.791682  | coding    |
| MSTRG. 25196.6 | 0.415361  | coding    |
| MSTRG. 25198.1 | -2.24168  | noncoding |
| MSTRG. 25190.3 | 0.721611  | coding    |
| MSTRG. 25205.4 | 2.1026    | coding    |
| MSTRG. 25205.5 | 2.38114   | coding    |
| MSTRG. 25206.1 | -0.61708  | noncoding |
| MSTRG. 25205.6 | 1.98954   | coding    |
| MSTRG. 25207.1 | -0.295411 | noncoding |
| MSTRG. 25207.2 | -0.237672 | noncoding |
| MSTRG. 25207.3 | -0.184866 | noncoding |
| MSTRG. 25207.4 | -0.827373 | noncoding |
| MSTRG. 25208.1 | -1.94507  | noncoding |
| MSTRG. 25211.1 | -0.534106 | noncoding |
| MSTRG. 25214.1 | 1.22952   | coding    |
| MSTRG. 25214.2 | 0.843436  | coding    |
| MSTRG. 25217.1 | -0.152481 | noncoding |
| MSTRG. 25232.1 | -1.77343  | noncoding |
| MSTRG. 25248.1 | -0.241141 | noncoding |
| MSTRG. 25254.2 | 1.18578   | coding    |
| MSTRG. 25221.1 | -2.67718  | noncoding |
| MSTRG. 25224.3 | -1.99637  | noncoding |
| MSTRG. 25226.1 | -0.149404 | noncoding |
| MSTRG. 25226.3 | -0.06282  | noncoding |
| MSTRG. 25226.5 | -0.271212 | noncoding |
| MSTRG. 25226.4 | -0.919892 | noncoding |
| MSTRG. 25226.8 | -0.511776 | noncoding |
| MSTRG. 25255.4 | 2.06638   | coding    |
| MSTRG. 25255.1 | 1.65146   | coding    |
| MSTRG. 25256.1 | 0.235075  | coding    |
| MSTRG. 25257.1 | -0.563105 | noncoding |
| MSTRG. 25258.1 | -0.367105 | noncoding |
| MSTRG. 25255.6 | -0.244444 | noncoding |
| MSTRG. 25268.6 | 1.99285   | coding    |
| MSTRG. 25269.1 | -0.928046 | noncoding |
| MSTRG. 25280.2 | -1.18495  | noncoding |
| MSTRG. 25261.1 | 1.60069   | coding    |
| MSTRG. 25262.1 | -1.28979  | noncoding |
| MSTRG. 25262.2 | -0.684132 | noncoding |
| MSTRG. 25265.1 | -2.53429  | noncoding |
| MSTRG. 25281.1 | -0.91502  | noncoding |
| MSTRG. 25285.2 | -1.10858  | noncoding |
| MSTRG. 25290.3 | 1.84384   | coding    |
| MSTRG. 25297.2 | -1.57814  | noncoding |
| MSTRG. 25298.1 | 0.409511  | coding    |
| MSTRG. 25302.1 | -2.06223  | noncoding |
| MSTRG. 25310.1 | -1.36555  | noncoding |
| MSTRG. 25318.1 | 0.980567  | coding    |

|                |           |           |
|----------------|-----------|-----------|
| MSTRG. 25315.1 | 0.103424  | coding    |
| MSTRG. 25327.1 | 1.7923    | coding    |
| MSTRG. 25327.2 | 1.93501   | coding    |
| MSTRG. 25327.3 | 2.02941   | coding    |
| MSTRG. 25328.1 | -0.759918 | noncoding |
| MSTRG. 25329.1 | -3.086    | noncoding |
| MSTRG. 25335.1 | 1.57429   | coding    |
| MSTRG. 25335.2 | -1.32904  | noncoding |
| MSTRG. 25342.1 | 2.01341   | coding    |
| MSTRG. 25342.4 | 2.22486   | coding    |
| MSTRG. 25342.5 | 1.89634   | coding    |
| MSTRG. 25343.1 | -0.203409 | noncoding |
| MSTRG. 25348.2 | 2.66916   | coding    |
| MSTRG. 25350.2 | -0.922647 | noncoding |
| MSTRG. 25351.2 | 2.71018   | coding    |
| MSTRG. 25351.3 | 2.71342   | coding    |
| MSTRG. 25351.4 | 2.66222   | coding    |
| MSTRG. 25356.2 | -0.944392 | noncoding |
| MSTRG. 25359.1 | 1.49623   | coding    |
| MSTRG. 25359.4 | 1.69597   | coding    |
| MSTRG. 25353.1 | 0.142968  | coding    |
| MSTRG. 25353.3 | 0.193249  | coding    |
| MSTRG. 25354.1 | -2.42551  | noncoding |
| MSTRG. 25354.2 | -1.84487  | noncoding |
| MSTRG. 25361.1 | 0.350034  | coding    |
| MSTRG. 25361.3 | -0.226119 | noncoding |
| MSTRG. 25364.1 | -0.139092 | noncoding |
| MSTRG. 25362.2 | 0.921985  | coding    |
| MSTRG. 25372.1 | -1.10284  | noncoding |
| MSTRG. 25384.1 | 1.05622   | coding    |
| MSTRG. 25384.2 | 0.995062  | coding    |
| MSTRG. 25384.3 | 0.7255    | coding    |
| MSTRG. 25384.6 | -0.075095 | noncoding |
| MSTRG. 25388.1 | 2.33528   | coding    |
| MSTRG. 25388.5 | 1.88315   | coding    |
| MSTRG. 25388.6 | 2.10852   | coding    |
| MSTRG. 25388.7 | -0.605731 | noncoding |
| MSTRG. 25389.1 | 0.130211  | coding    |
| MSTRG. 25390.1 | 0.613894  | coding    |
| MSTRG. 25389.2 | -1.45208  | noncoding |
| MSTRG. 25389.3 | -0.738622 | noncoding |
| MSTRG. 25409.4 | 1.36473   | coding    |
| MSTRG. 25409.5 | 1.78818   | coding    |
| MSTRG. 25409.7 | 1.41513   | coding    |
| MSTRG. 25410.2 | 1.98384   | coding    |
| MSTRG. 25413.2 | 2.56043   | coding    |
| MSTRG. 25413.3 | 2.96905   | coding    |
| MSTRG. 25413.4 | 2.95453   | coding    |
| MSTRG. 25413.5 | 2.91501   | coding    |
| MSTRG. 25413.6 | 1.04212   | coding    |
| MSTRG. 25413.7 | 2.1863    | coding    |
| MSTRG. 25415.1 | 1.80673   | coding    |
| MSTRG. 25415.2 | 1.21561   | coding    |
| MSTRG. 25415.3 | -1.69946  | noncoding |

|                  |            |           |
|------------------|------------|-----------|
| MSTRG. 25415. 4  | 2. 37515   | coding    |
| MSTRG. 25417. 1  | -1. 122    | noncoding |
| MSTRG. 25399. 1  | 1. 38231   | coding    |
| MSTRG. 25391. 1  | -2. 26301  | noncoding |
| MSTRG. 25405. 2  | 0. 16063   | coding    |
| MSTRG. 25406. 1  | -0. 046045 | noncoding |
| MSTRG. 25405. 3  | -1. 96429  | noncoding |
| MSTRG. 25433. 2  | 0. 109942  | coding    |
| MSTRG. 25434. 1  | -1. 73379  | noncoding |
| MSTRG. 25435. 3  | 1. 71178   | coding    |
| MSTRG. 25436. 1  | 1. 38451   | coding    |
| MSTRG. 25436. 2  | 1. 6531    | coding    |
| MSTRG. 25436. 5  | 1. 28284   | coding    |
| MSTRG. 25437. 1  | -1. 9121   | noncoding |
| MSTRG. 25441. 2  | 0. 95999   | coding    |
| MSTRG. 25447. 2  | 1. 46588   | coding    |
| MSTRG. 25447. 6  | 1. 51075   | coding    |
| MSTRG. 25447. 7  | 1. 18903   | coding    |
| MSTRG. 25448. 1  | 0. 674286  | coding    |
| MSTRG. 25444. 1  | -0. 594977 | noncoding |
| MSTRG. 25451. 4  | 0. 893423  | coding    |
| MSTRG. 25462. 1  | -1. 57534  | noncoding |
| MSTRG. 25463. 1  | 0. 489683  | coding    |
| MSTRG. 25465. 1  | -0. 491346 | noncoding |
| MSTRG. 25472. 5  | -0. 038948 | noncoding |
| MSTRG. 25472. 6  | 1. 54065   | coding    |
| MSTRG. 25472. 7  | 1. 43088   | coding    |
| MSTRG. 25472. 8  | 1. 45393   | coding    |
| MSTRG. 25477. 1  | 2. 11344   | coding    |
| MSTRG. 25477. 2  | 2. 26325   | coding    |
| MSTRG. 25478. 1  | 0. 433205  | coding    |
| MSTRG. 25478. 3  | 0. 690393  | coding    |
| MSTRG. 25478. 5  | 0. 406723  | coding    |
| MSTRG. 25480. 3  | 1. 47514   | coding    |
| MSTRG. 25480. 4  | 2. 53503   | coding    |
| MSTRG. 25483. 1  | -1. 86141  | noncoding |
| MSTRG. 25483. 2  | -0. 98513  | noncoding |
| MSTRG. 25484. 2  | -0. 560004 | noncoding |
| MSTRG. 25489. 2  | 0. 797363  | coding    |
| MSTRG. 25489. 3  | 1. 12355   | coding    |
| MSTRG. 25491. 1  | 1. 54222   | coding    |
| MSTRG. 25492. 4  | 1. 16571   | coding    |
| MSTRG. 25492. 3  | 1. 24296   | coding    |
| MSTRG. 25492. 5  | 1. 09563   | coding    |
| MSTRG. 25499. 3  | 1. 72547   | coding    |
| MSTRG. 25499. 2  | 0. 882846  | coding    |
| MSTRG. 25499. 6  | 1. 48183   | coding    |
| MSTRG. 25499. 7  | 0. 903048  | coding    |
| MSTRG. 25499. 8  | 0. 98095   | coding    |
| MSTRG. 25499. 10 | -0. 484933 | noncoding |
| MSTRG. 25508. 1  | 0. 345198  | coding    |
| MSTRG. 25508. 3  | 0. 657327  | coding    |
| MSTRG. 25508. 4  | 0. 46769   | coding    |
| MSTRG. 25508. 5  | 1. 01534   | coding    |

|                 |           |           |
|-----------------|-----------|-----------|
| MSTRG. 25508.6  | 0.675059  | coding    |
| MSTRG. 25508.7  | 0.001705  | coding    |
| MSTRG. 25509.1  | 0.054378  | coding    |
| MSTRG. 25508.9  | 1.82387   | coding    |
| MSTRG. 25508.8  | 0.863291  | coding    |
| MSTRG. 25510.1  | -2.28076  | noncoding |
| MSTRG. 25508.10 | 0.804685  | coding    |
| MSTRG. 25508.11 | 0.495158  | coding    |
| MSTRG. 25508.12 | 0.666747  | coding    |
| MSTRG. 25508.13 | 0.320505  | coding    |
| MSTRG. 25511.1  | -0.701555 | noncoding |
| MSTRG. 25512.1  | 0.20757   | coding    |
| MSTRG. 25512.2  | -0.261082 | noncoding |
| MSTRG. 25513.1  | -0.846979 | noncoding |
| MSTRG. 25514.1  | -0.20276  | noncoding |
| MSTRG. 25508.14 | 0.144391  | coding    |
| MSTRG. 25517.1  | 0.801042  | coding    |
| MSTRG. 25517.3  | 0.583704  | coding    |
| MSTRG. 25517.4  | 0.242174  | coding    |
| MSTRG. 25518.2  | 2.30004   | coding    |
| MSTRG. 25528.2  | 0.887344  | coding    |
| MSTRG. 25528.3  | 1.29245   | coding    |
| MSTRG. 25529.1  | -0.092979 | noncoding |
| MSTRG. 25528.4  | 0.585754  | coding    |
| MSTRG. 25530.1  | 0.535302  | coding    |
| MSTRG. 25531.1  | -1.42438  | noncoding |
| MSTRG. 25532.1  | 0.450165  | coding    |
| MSTRG. 25537.2  | 0.663952  | coding    |
| MSTRG. 25537.1  | 0.641788  | coding    |
| MSTRG. 25537.3  | 0.617151  | coding    |
| MSTRG. 25540.1  | 1.25299   | coding    |
| MSTRG. 25546.1  | 1.2008    | coding    |
| MSTRG. 25550.3  | 2.14977   | coding    |
| MSTRG. 25552.1  | 1.88341   | coding    |
| MSTRG. 25552.2  | 1.82679   | coding    |
| MSTRG. 25552.3  | 1.83375   | coding    |
| MSTRG. 25552.4  | 1.94575   | coding    |
| MSTRG. 25552.5  | 1.61387   | coding    |
| MSTRG. 25552.6  | 1.68527   | coding    |
| MSTRG. 25552.7  | 1.83969   | coding    |
| MSTRG. 25552.9  | 2.34056   | coding    |
| MSTRG. 25552.10 | 2.27324   | coding    |
| MSTRG. 25556.3  | 0.012183  | coding    |
| MSTRG. 25557.2  | 2.20038   | coding    |
| MSTRG. 25571.1  | 0.526381  | coding    |
| MSTRG. 25577.7  | 2.4687    | coding    |
| MSTRG. 25577.8  | 2.48547   | coding    |
| MSTRG. 25582.3  | 1.90271   | coding    |
| MSTRG. 25593.2  | 0.960624  | coding    |
| MSTRG. 25594.1  | -0.831924 | noncoding |
| MSTRG. 25595.1  | 2.42511   | coding    |
| MSTRG. 25601.2  | 1.62866   | coding    |
| MSTRG. 25597.2  | 2.22108   | coding    |
| MSTRG. 25597.3  | -0.999623 | noncoding |

|                  |            |           |
|------------------|------------|-----------|
| MSTRG. 25598. 2  | -1. 87983  | noncoding |
| MSTRG. 25598. 1  | -1. 78542  | noncoding |
| MSTRG. 25599. 1  | -1. 45909  | noncoding |
| MSTRG. 25597. 4  | 0. 649289  | coding    |
| MSTRG. 25602. 1  | 1. 74038   | coding    |
| MSTRG. 25602. 2  | 2. 38261   | coding    |
| MSTRG. 25602. 4  | 1. 5737    | coding    |
| MSTRG. 25602. 5  | 0. 873703  | coding    |
| MSTRG. 25604. 3  | 2. 11979   | coding    |
| MSTRG. 25604. 2  | 1. 7965    | coding    |
| MSTRG. 25615. 2  | 2. 47885   | coding    |
| MSTRG. 25615. 6  | 2. 2822    | coding    |
| MSTRG. 25615. 7  | 2. 20442   | coding    |
| MSTRG. 25615. 9  | 2. 26101   | coding    |
| MSTRG. 25615. 10 | 1. 32475   | coding    |
| MSTRG. 25607. 5  | 2. 11422   | coding    |
| MSTRG. 25608. 1  | -1. 22614  | noncoding |
| MSTRG. 25609. 1  | -0. 425799 | noncoding |
| MSTRG. 25610. 1  | -1. 15561  | noncoding |
| MSTRG. 25610. 2  | 0. 597511  | coding    |
| MSTRG. 25611. 1  | -0. 853743 | noncoding |
| MSTRG. 25614. 1  | -1. 67991  | noncoding |
| MSTRG. 25616. 2  | 1. 71421   | coding    |
| MSTRG. 25616. 3  | 1. 32373   | coding    |
| MSTRG. 25620. 2  | 1. 92103   | coding    |
| MSTRG. 25626. 1  | -1. 18728  | noncoding |
| MSTRG. 25622. 1  | -1. 50594  | noncoding |
| MSTRG. 25622. 2  | -2. 45746  | noncoding |
| MSTRG. 25623. 1  | -2. 20251  | noncoding |
| MSTRG. 25630. 1  | -3. 0594   | noncoding |
| MSTRG. 25631. 2  | 0. 146321  | coding    |
| MSTRG. 25632. 2  | 0. 993578  | coding    |
| MSTRG. 25632. 4  | 1. 51668   | coding    |
| MSTRG. 25635. 1  | -0. 03316  | noncoding |
| MSTRG. 25637. 2  | 1. 34616   | coding    |
| MSTRG. 25638. 1  | 1. 20502   | coding    |
| MSTRG. 25638. 2  | -1. 64781  | noncoding |
| MSTRG. 25642. 1  | -1. 75662  | noncoding |
| MSTRG. 25642. 2  | -2. 43619  | noncoding |
| MSTRG. 25639. 1  | -2. 06302  | noncoding |
| MSTRG. 25653. 1  | -0. 401326 | noncoding |
| MSTRG. 25654. 2  | 0. 881772  | coding    |
| MSTRG. 25654. 3  | 2. 20431   | coding    |
| MSTRG. 25657. 6  | 2. 26281   | coding    |
| MSTRG. 25657. 7  | 1. 93437   | coding    |
| MSTRG. 25664. 2  | 1. 86349   | coding    |
| MSTRG. 25667. 1  | -1. 56711  | noncoding |
| MSTRG. 25711. 1  | -0. 942719 | noncoding |
| MSTRG. 25711. 2  | -1. 06198  | noncoding |
| MSTRG. 25711. 3  | -0. 006563 | noncoding |
| MSTRG. 25711. 4  | -0. 956663 | noncoding |
| MSTRG. 25712. 1  | 0. 63852   | coding    |
| MSTRG. 25711. 5  | -0. 271526 | noncoding |
| MSTRG. 25711. 6  | 0. 007514  | coding    |

|                 |            |           |
|-----------------|------------|-----------|
| MSTRG. 25711. 7 | -0. 416405 | noncoding |
| MSTRG. 25707. 1 | -1. 16957  | noncoding |
| MSTRG. 25718. 1 | -0. 979849 | noncoding |
| MSTRG. 25723. 2 | 0. 395438  | coding    |
| MSTRG. 25725. 1 | -1. 24984  | noncoding |
| MSTRG. 25726. 3 | 0. 857893  | coding    |
| MSTRG. 25730. 2 | 0. 544442  | coding    |
| MSTRG. 25734. 2 | 1. 22571   | coding    |
| MSTRG. 25734. 3 | 1. 35306   | coding    |
| MSTRG. 25736. 1 | -1. 74815  | noncoding |
| MSTRG. 25734. 4 | -0. 12934  | noncoding |
| MSTRG. 25737. 2 | 1. 60452   | coding    |
| MSTRG. 25747. 4 | 2. 75674   | coding    |
| MSTRG. 25747. 2 | 2. 86052   | coding    |
| MSTRG. 25748. 1 | 0. 029316  | coding    |
| MSTRG. 25748. 2 | 0. 81497   | coding    |
| MSTRG. 25739. 1 | -1. 66228  | noncoding |
| MSTRG. 25749. 1 | -1. 1551   | noncoding |
| MSTRG. 25750. 1 | -1. 60703  | noncoding |
| MSTRG. 25750. 2 | -1. 24142  | noncoding |
| MSTRG. 25752. 1 | 0. 833909  | coding    |
| MSTRG. 25760. 4 | 2. 40903   | coding    |
| MSTRG. 25757. 2 | 0. 423954  | coding    |
| MSTRG. 25771. 2 | 1. 64169   | coding    |
| MSTRG. 25772. 1 | -0. 970796 | noncoding |
| MSTRG. 25771. 3 | 1. 03863   | coding    |
| MSTRG. 25771. 4 | 0. 890249  | coding    |
| MSTRG. 25771. 5 | 0. 790778  | coding    |
| MSTRG. 25778. 1 | 0. 669411  | coding    |
| MSTRG. 25779. 2 | -0. 197913 | noncoding |
| MSTRG. 25779. 3 | 0. 614907  | coding    |
| MSTRG. 25773. 1 | -0. 894785 | noncoding |
| MSTRG. 25781. 2 | 2. 79      | coding    |
| MSTRG. 25782. 1 | -1. 79801  | noncoding |
| MSTRG. 25782. 2 | -1. 67504  | noncoding |
| MSTRG. 25784. 1 | -0. 116353 | noncoding |
| MSTRG. 25785. 2 | 0. 166982  | coding    |
| MSTRG. 25790. 1 | -0. 989238 | noncoding |
| MSTRG. 25796. 1 | 0. 070978  | coding    |
| MSTRG. 25796. 2 | 0. 549846  | coding    |
| MSTRG. 25798. 1 | 0. 331025  | coding    |
| MSTRG. 25799. 1 | -1. 10804  | noncoding |
| MSTRG. 25802. 1 | -1. 48704  | noncoding |
| MSTRG. 25802. 2 | -0. 441827 | noncoding |
| MSTRG. 25803. 1 | -1. 75515  | noncoding |
| MSTRG. 25808. 1 | -0. 800066 | noncoding |
| MSTRG. 25809. 1 | -1. 26272  | noncoding |
| MSTRG. 25809. 2 | -1. 02829  | noncoding |
| MSTRG. 25809. 3 | -1. 01027  | noncoding |
| MSTRG. 25806. 1 | 0. 275613  | coding    |
| MSTRG. 25817. 2 | 1. 1818    | coding    |
| MSTRG. 25817. 3 | 1. 31746   | coding    |
| MSTRG. 25828. 1 | 0. 617056  | coding    |
| MSTRG. 25824. 4 | 1. 5201    | coding    |

|                  |            |           |
|------------------|------------|-----------|
| MSTRG. 25847. 1  | -2. 46971  | noncoding |
| MSTRG. 25848. 1  | -1. 06364  | noncoding |
| MSTRG. 25848. 2  | -1. 00701  | noncoding |
| MSTRG. 25849. 1  | -1. 34077  | noncoding |
| MSTRG. 25857. 1  | -0. 566764 | noncoding |
| MSTRG. 25858. 1  | -1. 2844   | noncoding |
| MSTRG. 25857. 2  | -1. 86946  | noncoding |
| MSTRG. 25861. 1  | -1. 74104  | noncoding |
| MSTRG. 25862. 1  | -2. 7113   | noncoding |
| MSTRG. 25869. 1  | -2. 50341  | noncoding |
| MSTRG. 25872. 1  | -2. 01841  | noncoding |
| MSTRG. 25897. 4  | -0. 11819  | noncoding |
| MSTRG. 25897. 6  | -0. 076849 | noncoding |
| MSTRG. 25897. 3  | 0. 694132  | coding    |
| MSTRG. 25897. 7  | 0. 015363  | coding    |
| MSTRG. 25898. 1  | -0. 502477 | noncoding |
| MSTRG. 25897. 11 | -0. 180538 | noncoding |
| MSTRG. 25897. 12 | -0. 482701 | noncoding |
| MSTRG. 25897. 13 | -0. 494223 | noncoding |
| MSTRG. 25897. 14 | -0. 388958 | noncoding |
| MSTRG. 25874. 2  | 2. 37687   | coding    |
| MSTRG. 25874. 1  | 2. 78891   | coding    |
| MSTRG. 25907. 2  | 1. 28801   | coding    |
| MSTRG. 25907. 3  | 0. 704455  | coding    |
| MSTRG. 25911. 2  | 0. 936301  | coding    |
| MSTRG. 25912. 2  | 2. 26078   | coding    |
| MSTRG. 25916. 1  | 0. 419011  | coding    |
| MSTRG. 25916. 2  | 0. 36906   | coding    |
| MSTRG. 25917. 1  | -1. 81555  | noncoding |
| MSTRG. 25923. 1  | -1. 15422  | noncoding |
| MSTRG. 25926. 4  | 0. 93333   | coding    |
| MSTRG. 25926. 5  | 0. 602925  | coding    |
| MSTRG. 25927. 1  | -0. 444101 | noncoding |
| MSTRG. 25928. 1  | -1. 0193   | noncoding |
| MSTRG. 25926. 6  | -0. 981754 | noncoding |
| MSTRG. 25929. 1  | -0. 236547 | noncoding |
| MSTRG. 25940. 1  | 0. 759696  | coding    |
| MSTRG. 25940. 5  | 0. 919023  | coding    |
| MSTRG. 25940. 3  | 1. 08622   | coding    |
| MSTRG. 25949. 3  | 2. 11579   | coding    |
| MSTRG. 25950. 1  | 0. 304117  | coding    |
| MSTRG. 25951. 1  | 0. 104691  | coding    |
| MSTRG. 25949. 5  | 2. 55625   | coding    |
| MSTRG. 25949. 6  | 1. 74576   | coding    |
| MSTRG. 25949. 7  | 1. 24118   | coding    |
| MSTRG. 25949. 8  | 2. 2972    | coding    |
| MSTRG. 25956. 1  | -1. 56615  | noncoding |
| MSTRG. 25958. 1  | 0. 335442  | coding    |
| MSTRG. 25958. 2  | -0. 026598 | noncoding |
| MSTRG. 25958. 3  | 0. 139281  | coding    |
| MSTRG. 25959. 1  | -0. 060945 | noncoding |
| MSTRG. 25959. 2  | 0. 646351  | coding    |
| MSTRG. 25959. 3  | 0. 574406  | coding    |
| MSTRG. 25959. 5  | 0. 387899  | coding    |



|                  |            |           |
|------------------|------------|-----------|
| MSTRG. 25959. 4  | 0. 633704  | coding    |
| MSTRG. 25959. 6  | -0. 266411 | noncoding |
| MSTRG. 25959. 7  | 0. 397191  | coding    |
| MSTRG. 25959. 8  | 0. 420409  | coding    |
| MSTRG. 25960. 1  | 1. 71146   | coding    |
| MSTRG. 25972. 1  | -2. 08062  | noncoding |
| MSTRG. 25973. 2  | 0. 538437  | coding    |
| MSTRG. 25973. 3  | 0. 762183  | coding    |
| MSTRG. 25973. 4  | 0. 969145  | coding    |
| MSTRG. 25973. 6  | -0. 021938 | noncoding |
| MSTRG. 25977. 1  | 0. 581807  | coding    |
| MSTRG. 25977. 2  | 0. 43706   | coding    |
| MSTRG. 25977. 3  | -0. 503178 | noncoding |
| MSTRG. 25978. 2  | -0. 235119 | noncoding |
| MSTRG. 25975. 1  | -1. 9118   | noncoding |
| MSTRG. 25980. 2  | 0. 710333  | coding    |
| MSTRG. 25997. 5  | 1. 62595   | coding    |
| MSTRG. 25997. 4  | 2. 08267   | coding    |
| MSTRG. 25997. 1  | 2. 12997   | coding    |
| MSTRG. 25997. 2  | 2. 12312   | coding    |
| MSTRG. 25997. 6  | 1. 91879   | coding    |
| MSTRG. 25998. 1  | -1. 49097  | noncoding |
| MSTRG. 25997. 8  | 2. 36935   | coding    |
| MSTRG. 25997. 7  | 2. 34472   | coding    |
| MSTRG. 25997. 9  | 2. 44491   | coding    |
| MSTRG. 25997. 10 | 2. 36985   | coding    |
| MSTRG. 25997. 11 | 2. 36115   | coding    |
| MSTRG. 25997. 12 | 2. 56057   | coding    |
| MSTRG. 25997. 13 | 0. 737431  | coding    |
| MSTRG. 25997. 14 | 1. 04896   | coding    |
| MSTRG. 25997. 18 | 0. 584189  | coding    |
| MSTRG. 25997. 19 | -0. 04585  | noncoding |
| MSTRG. 25997. 20 | 0. 084954  | coding    |
| MSTRG. 25997. 21 | -0. 378314 | noncoding |
| MSTRG. 25989. 1  | 0. 124599  | coding    |
| MSTRG. 25989. 2  | 0. 181285  | coding    |
| MSTRG. 25989. 3  | 0. 18633   | coding    |
| MSTRG. 25989. 5  | 0. 241217  | coding    |
| MSTRG. 25989. 6  | 0. 115075  | coding    |
| MSTRG. 25991. 1  | 0. 180005  | coding    |
| MSTRG. 25991. 2  | 0. 106498  | coding    |
| MSTRG. 25991. 3  | 0. 224894  | coding    |
| MSTRG. 25991. 4  | 0. 230654  | coding    |
| MSTRG. 25991. 5  | 0. 194899  | coding    |
| MSTRG. 25985. 2  | 1. 01077   | coding    |
| MSTRG. 25986. 1  | -0. 48475  | noncoding |
| MSTRG. 25992. 2  | 2. 96983   | coding    |
| MSTRG. 25993. 1  | -0. 368011 | noncoding |
| MSTRG. 25994. 1  | 0. 047804  | coding    |
| MSTRG. 25994. 2  | 0. 705362  | coding    |
| MSTRG. 25995. 1  | 0. 245747  | coding    |
| MSTRG. 25992. 3  | 0. 428201  | coding    |
| MSTRG. 25992. 4  | 0. 445017  | coding    |
| MSTRG. 26010. 2  | 1. 20091   | coding    |

|               |           |           |
|---------------|-----------|-----------|
| MSTRG.26010.3 | 0.360025  | coding    |
| MSTRG.26016.1 | -0.290231 | noncoding |
| MSTRG.26018.1 | -0.791663 | noncoding |
| MSTRG.26021.1 | -0.609846 | noncoding |
| MSTRG.26026.5 | -0.179116 | noncoding |
| MSTRG.26026.4 | -0.324564 | noncoding |
| MSTRG.26026.2 | -0.431604 | noncoding |
| MSTRG.26026.3 | -0.22931  | noncoding |
| MSTRG.26028.1 | 0.9523    | coding    |
| MSTRG.26033.1 | 2.13664   | coding    |
| MSTRG.26034.1 | -2.3674   | noncoding |
| MSTRG.26034.3 | -0.13372  | noncoding |
| MSTRG.26034.2 | -0.077737 | noncoding |
| MSTRG.26034.4 | 0.46418   | coding    |
| MSTRG.26034.5 | 0.073275  | coding    |
| MSTRG.26034.6 | -0.136963 | noncoding |
| MSTRG.26034.7 | 0.087347  | coding    |
| MSTRG.26031.2 | 1.55848   | coding    |
| MSTRG.26031.3 | -0.446261 | noncoding |
| MSTRG.26035.2 | 1.97417   | coding    |
| MSTRG.26035.3 | 1.93317   | coding    |
| MSTRG.26036.1 | 1.32535   | coding    |
| MSTRG.26038.2 | 2.28095   | coding    |
| MSTRG.26038.3 | 1.92925   | coding    |
| MSTRG.26037.1 | 1.72689   | coding    |
| MSTRG.26041.2 | 2.20931   | coding    |
| MSTRG.26042.1 | 2.12785   | coding    |
| MSTRG.26042.2 | 2.01776   | coding    |
| MSTRG.26051.1 | 2.59966   | coding    |
| MSTRG.26052.1 | 0.89597   | coding    |
| MSTRG.26053.3 | -1.64862  | noncoding |
| MSTRG.26053.4 | 1.0129    | coding    |
| MSTRG.26045.2 | 0.60825   | coding    |
| MSTRG.26048.1 | -2.28731  | noncoding |
| MSTRG.26047.2 | -0.176509 | noncoding |
| MSTRG.26059.1 | 2.39006   | coding    |
| MSTRG.26059.2 | 2.5909    | coding    |
| MSTRG.26083.4 | 1.47324   | coding    |
| MSTRG.26083.5 | 1.465     | coding    |
| MSTRG.26087.7 | 0.742732  | coding    |
| MSTRG.26087.6 | 0.483619  | coding    |
| MSTRG.26087.5 | 2.31781   | coding    |
| MSTRG.26088.1 | -0.408374 | noncoding |
| MSTRG.26089.1 | -0.202528 | noncoding |
| MSTRG.26091.1 | 1.69227   | coding    |
| MSTRG.26091.4 | 2.21925   | coding    |
| MSTRG.26091.2 | 2.28668   | coding    |
| MSTRG.26093.1 | -0.598391 | noncoding |
| MSTRG.26096.1 | -0.140581 | noncoding |
| MSTRG.26102.2 | 1.38613   | coding    |
| MSTRG.26106.1 | -0.144814 | noncoding |
| MSTRG.26106.2 | -0.014101 | noncoding |
| MSTRG.26107.2 | -0.407946 | noncoding |
| MSTRG.26108.1 | -0.987057 | noncoding |

|                  |            |           |
|------------------|------------|-----------|
| MSTRG. 26109. 1  | -0. 328648 | noncoding |
| MSTRG. 26111. 4  | 1. 87606   | coding    |
| MSTRG. 26112. 2  | -1. 23887  | noncoding |
| MSTRG. 26112. 3  | 0. 117765  | coding    |
| MSTRG. 26112. 4  | 0. 135245  | coding    |
| MSTRG. 26113. 1  | -0. 99104  | noncoding |
| MSTRG. 26118. 3  | -0. 402579 | noncoding |
| MSTRG. 26118. 11 | 0. 558076  | coding    |
| MSTRG. 26118. 12 | 0. 856228  | coding    |
| MSTRG. 26118. 13 | 1. 12233   | coding    |
| MSTRG. 26120. 1  | -0. 627283 | noncoding |
| MSTRG. 26121. 1  | 0. 24284   | coding    |
| MSTRG. 26123. 1  | 0. 052318  | coding    |
| MSTRG. 26123. 2  | 0. 650703  | coding    |
| MSTRG. 26123. 8  | 1. 0459    | coding    |
| MSTRG. 26123. 10 | 0. 796227  | coding    |
| MSTRG. 26123. 12 | 0. 884541  | coding    |
| MSTRG. 26123. 11 | 0. 716056  | coding    |
| MSTRG. 26123. 9  | 0. 883852  | coding    |
| MSTRG. 26123. 14 | 0. 381302  | coding    |
| MSTRG. 26123. 13 | 0. 298734  | coding    |
| MSTRG. 26124. 2  | 0. 46064   | coding    |
| MSTRG. 26126. 2  | 2. 3273    | coding    |
| MSTRG. 26126. 4  | 0. 222979  | coding    |
| MSTRG. 26122. 2  | 1. 97752   | coding    |
| MSTRG. 26138. 1  | -1. 19266  | noncoding |
| MSTRG. 26139. 1  | -0. 03445  | noncoding |
| MSTRG. 26142. 2  | 1. 16937   | coding    |
| MSTRG. 26142. 3  | 0. 856005  | coding    |
| MSTRG. 26147. 3  | 2. 24506   | coding    |
| MSTRG. 26148. 1  | 0. 507032  | coding    |
| MSTRG. 26147. 6  | 1. 93667   | coding    |
| MSTRG. 26154. 2  | -0. 526036 | noncoding |
| MSTRG. 26154. 3  | -0. 425949 | noncoding |
| MSTRG. 26158. 3  | 0. 952215  | coding    |
| MSTRG. 26163. 1  | -1. 73208  | noncoding |
| MSTRG. 26171. 1  | 1. 1206    | coding    |
| MSTRG. 26171. 3  | -0. 062464 | noncoding |
| MSTRG. 26171. 4  | 1. 36559   | coding    |
| MSTRG. 26171. 5  | 1. 98072   | coding    |
| MSTRG. 26180. 1  | 0. 962025  | coding    |
| MSTRG. 26180. 2  | 2. 2687    | coding    |
| MSTRG. 26180. 5  | 2. 74065   | coding    |
| MSTRG. 26180. 6  | 2. 63698   | coding    |
| MSTRG. 26180. 13 | 2. 2716    | coding    |
| MSTRG. 26181. 1  | -0. 701105 | noncoding |
| MSTRG. 26180. 14 | 0. 568185  | coding    |
| MSTRG. 26180. 17 | -1. 69559  | noncoding |
| MSTRG. 26180. 18 | 0. 272725  | coding    |
| MSTRG. 26180. 19 | 0. 576726  | coding    |
| MSTRG. 26180. 20 | 0. 353155  | coding    |
| MSTRG. 26180. 21 | 0. 152173  | coding    |
| MSTRG. 26184. 2  | 2. 14466   | coding    |
| MSTRG. 26184. 3  | 0. 240943  | coding    |

|                  |            |           |
|------------------|------------|-----------|
| MSTRG. 26184. 5  | 0. 605904  | coding    |
| MSTRG. 26185. 1  | 1. 65342   | coding    |
| MSTRG. 26185. 3  | 1. 52747   | coding    |
| MSTRG. 26186. 1  | -1. 75801  | noncoding |
| MSTRG. 26187. 1  | -1. 28436  | noncoding |
| MSTRG. 26182. 2  | 0. 424311  | coding    |
| MSTRG. 26192. 1  | -2. 05326  | noncoding |
| MSTRG. 26194. 17 | -0. 405422 | noncoding |
| MSTRG. 26189. 2  | -0. 626949 | noncoding |
| MSTRG. 26190. 1  | -1. 33165  | noncoding |
| MSTRG. 26203. 1  | -2. 33259  | noncoding |
| MSTRG. 26212. 1  | 0. 214875  | coding    |
| MSTRG. 26213. 1  | 0. 445625  | coding    |
| MSTRG. 26213. 2  | -0. 637842 | noncoding |
| MSTRG. 26213. 3  | 0. 08725   | coding    |
| MSTRG. 26213. 5  | -0. 6148   | noncoding |
| MSTRG. 26213. 6  | -0. 19452  | noncoding |
| MSTRG. 26214. 3  | 1. 43526   | coding    |
| MSTRG. 26215. 3  | 0. 740883  | coding    |
| MSTRG. 26216. 1  | -0. 029769 | noncoding |
| MSTRG. 26220. 2  | 1. 32319   | coding    |
| MSTRG. 26224. 1  | 3. 05221   | coding    |
| MSTRG. 26224. 2  | 3. 17593   | coding    |
| MSTRG. 26224. 3  | 3. 27226   | coding    |
| MSTRG. 26224. 4  | 3. 04563   | coding    |
| MSTRG. 26224. 5  | 3. 1334    | coding    |
| MSTRG. 26226. 1  | 3. 08028   | coding    |
| MSTRG. 26226. 2  | 1. 08599   | coding    |
| MSTRG. 26227. 1  | -0. 970323 | noncoding |
| MSTRG. 26230. 2  | 1. 35692   | coding    |
| MSTRG. 26232. 3  | 2. 80637   | coding    |
| MSTRG. 26232. 4  | 2. 74484   | coding    |
| MSTRG. 26232. 5  | 2. 56342   | coding    |
| MSTRG. 26240. 5  | 0. 909389  | coding    |
| MSTRG. 26240. 6  | 0. 954544  | coding    |
| MSTRG. 26240. 7  | 0. 956014  | coding    |
| MSTRG. 26241. 1  | -0. 213958 | noncoding |
| MSTRG. 26242. 1  | -0. 049902 | noncoding |
| MSTRG. 26244. 1  | -0. 598662 | noncoding |
| MSTRG. 26244. 2  | -0. 378075 | noncoding |
| MSTRG. 26245. 1  | -0. 570468 | noncoding |
| MSTRG. 26246. 1  | 0. 295559  | coding    |
| MSTRG. 26240. 8  | 0. 724194  | coding    |
| MSTRG. 26247. 1  | -2. 23959  | noncoding |
| MSTRG. 26247. 2  | -1. 64653  | noncoding |
| MSTRG. 26249. 1  | -2. 55809  | noncoding |
| MSTRG. 26239. 1  | 2. 39146   | coding    |
| MSTRG. 26239. 2  | 2. 45908   | coding    |
| MSTRG. 26239. 4  | 2. 55558   | coding    |
| MSTRG. 26259. 5  | 0. 44365   | coding    |
| MSTRG. 26260. 1  | 0. 572888  | coding    |
| MSTRG. 26257. 1  | -1. 15487  | noncoding |
| MSTRG. 26257. 2  | -0. 806383 | noncoding |
| MSTRG. 26265. 1  | -0. 564835 | noncoding |

|                 |            |           |
|-----------------|------------|-----------|
| MSTRG. 26266. 1 | 1. 72845   | coding    |
| MSTRG. 26266. 2 | 1. 05249   | coding    |
| MSTRG. 26266. 3 | 0. 482769  | coding    |
| MSTRG. 26281. 1 | -1. 64782  | noncoding |
| MSTRG. 26282. 2 | -0. 439609 | noncoding |
| MSTRG. 26286. 2 | 1. 55679   | coding    |
| MSTRG. 26287. 5 | -0. 696937 | noncoding |
| MSTRG. 26287. 3 | -0. 651106 | noncoding |
| MSTRG. 26287. 4 | 1. 33769   | coding    |
| MSTRG. 26278. 1 | -0. 001045 | noncoding |
| MSTRG. 26291. 3 | 1. 59666   | coding    |
| MSTRG. 26291. 6 | 1. 80143   | coding    |
| MSTRG. 26291. 4 | 1. 23884   | coding    |
| MSTRG. 26292. 1 | -1. 27568  | noncoding |
| MSTRG. 26297. 3 | 0. 556436  | coding    |
| MSTRG. 26297. 4 | -2. 40945  | noncoding |
| MSTRG. 26299. 1 | -0. 888207 | noncoding |
| MSTRG. 26301. 1 | -1. 79786  | noncoding |
| MSTRG. 26303. 1 | 1. 1009    | coding    |
| MSTRG. 26308. 1 | -1. 95185  | noncoding |
| MSTRG. 26308. 2 | -2. 08688  | noncoding |
| MSTRG. 26315. 1 | -0. 408198 | noncoding |
| MSTRG. 26316. 1 | -1. 0421   | noncoding |
| MSTRG. 26321. 1 | 1. 16142   | coding    |
| MSTRG. 26321. 2 | 1. 19191   | coding    |
| MSTRG. 26321. 3 | 0. 612547  | coding    |
| MSTRG. 26321. 4 | 1. 14187   | coding    |
| MSTRG. 26321. 5 | -1. 04719  | noncoding |
| MSTRG. 26322. 1 | 0. 804181  | coding    |
| MSTRG. 26323. 1 | -2. 06977  | noncoding |
| MSTRG. 26324. 1 | -2. 07339  | noncoding |
| MSTRG. 26325. 1 | -0. 58919  | noncoding |
| MSTRG. 26338. 1 | -1. 25021  | noncoding |
| MSTRG. 26340. 1 | 2. 26629   | coding    |
| MSTRG. 26340. 2 | 2. 14565   | coding    |
| MSTRG. 26337. 1 | -1. 06613  | noncoding |
| MSTRG. 26337. 2 | -2. 02613  | noncoding |
| MSTRG. 26343. 1 | 1. 93538   | coding    |
| MSTRG. 26344. 1 | 0. 575504  | coding    |
| MSTRG. 26345. 1 | -1. 82531  | noncoding |
| MSTRG. 26345. 2 | 0. 056802  | coding    |
| MSTRG. 26346. 1 | 0. 446116  | coding    |
| MSTRG. 26347. 1 | -0. 554707 | noncoding |
| MSTRG. 26348. 1 | 0. 424229  | coding    |
| MSTRG. 26349. 1 | -0. 179399 | noncoding |
| MSTRG. 26369. 3 | 2. 33694   | coding    |
| MSTRG. 26369. 2 | 1. 47211   | coding    |
| MSTRG. 26369. 4 | 2. 16569   | coding    |
| MSTRG. 26369. 5 | 2. 18301   | coding    |
| MSTRG. 26370. 2 | 1. 84975   | coding    |
| MSTRG. 26373. 2 | 2. 08712   | coding    |
| MSTRG. 26373. 3 | 1. 84787   | coding    |
| MSTRG. 26374. 1 | 0. 792451  | coding    |
| MSTRG. 26375. 1 | 1. 49907   | coding    |

|                  |            |           |
|------------------|------------|-----------|
| MSTRG. 26376. 1  | -2. 08316  | noncoding |
| MSTRG. 26377. 1  | -1. 65599  | noncoding |
| MSTRG. 26374. 5  | 1. 24934   | coding    |
| MSTRG. 26374. 6  | 1. 04892   | coding    |
| MSTRG. 26374. 7  | 0. 500423  | coding    |
| MSTRG. 26374. 8  | 0. 90399   | coding    |
| MSTRG. 26375. 2  | -0. 180645 | noncoding |
| MSTRG. 26378. 2  | 0. 070837  | coding    |
| MSTRG. 26379. 7  | 2. 72383   | coding    |
| MSTRG. 26379. 6  | 3. 10401   | coding    |
| MSTRG. 26379. 9  | 3. 1593    | coding    |
| MSTRG. 26386. 1  | 0. 933668  | coding    |
| MSTRG. 26391. 2  | 0. 16501   | coding    |
| MSTRG. 26391. 3  | -0. 664079 | noncoding |
| MSTRG. 26391. 4  | 0. 778173  | coding    |
| MSTRG. 26391. 5  | 0. 86342   | coding    |
| MSTRG. 26394. 3  | 2. 46998   | coding    |
| MSTRG. 26394. 4  | 2. 57334   | coding    |
| MSTRG. 26394. 5  | 2. 97448   | coding    |
| MSTRG. 26394. 8  | 2. 99181   | coding    |
| MSTRG. 26395. 1  | 1. 14997   | coding    |
| MSTRG. 26394. 10 | 0. 08846   | coding    |
| MSTRG. 26394. 9  | 0. 054507  | coding    |
| MSTRG. 26389. 1  | -1. 98317  | noncoding |
| MSTRG. 26428. 1  | 0. 738045  | coding    |
| MSTRG. 26428. 4  | 0. 305154  | coding    |
| MSTRG. 26433. 1  | 0. 176447  | coding    |
| MSTRG. 26434. 1  | -0. 012483 | noncoding |
| MSTRG. 26433. 2  | 0. 197342  | coding    |
| MSTRG. 26428. 7  | 1. 70125   | coding    |
| MSTRG. 26399. 8  | -0. 595182 | noncoding |
| MSTRG. 26399. 7  | 0. 803276  | coding    |
| MSTRG. 26405. 1  | 2. 43127   | coding    |
| MSTRG. 26405. 2  | 2. 17011   | coding    |
| MSTRG. 26405. 5  | 1. 24915   | coding    |
| MSTRG. 26405. 4  | 1. 45705   | coding    |
| MSTRG. 26405. 6  | 1. 08794   | coding    |
| MSTRG. 26411. 4  | 1. 09649   | coding    |
| MSTRG. 26411. 5  | 2. 23689   | coding    |
| MSTRG. 26411. 3  | 2. 55158   | coding    |
| MSTRG. 26412. 1  | -2. 40329  | noncoding |
| MSTRG. 26413. 1  | 0. 378605  | coding    |
| MSTRG. 26415. 1  | -0. 940795 | noncoding |
| MSTRG. 26408. 1  | -1. 85713  | noncoding |
| MSTRG. 26439. 1  | 0. 906356  | coding    |
| MSTRG. 26448. 3  | 3. 1771    | coding    |
| MSTRG. 26448. 1  | 2. 9293    | coding    |
| MSTRG. 26448. 2  | 3. 24888   | coding    |
| MSTRG. 26448. 5  | 2. 82863   | coding    |
| MSTRG. 26448. 6  | 2. 20081   | coding    |
| MSTRG. 26448. 7  | 0. 327091  | coding    |
| MSTRG. 26452. 3  | 1. 17148   | coding    |
| MSTRG. 26453. 1  | -1. 48983  | noncoding |
| MSTRG. 26455. 1  | 0. 353339  | coding    |

|                  |            |           |
|------------------|------------|-----------|
| MSTRG. 26446. 4  | -0. 203809 | noncoding |
| MSTRG. 26446. 5  | -0. 198868 | noncoding |
| MSTRG. 26477. 1  | -1. 53163  | noncoding |
| MSTRG. 26491. 1  | 0. 624731  | coding    |
| MSTRG. 26493. 1  | 0. 814692  | coding    |
| MSTRG. 26495. 1  | -1. 32872  | noncoding |
| MSTRG. 26498. 1  | -0. 526188 | noncoding |
| MSTRG. 26498. 2  | 0. 999973  | coding    |
| MSTRG. 26461. 4  | 1. 7051    | coding    |
| MSTRG. 26461. 2  | 2. 15181   | coding    |
| MSTRG. 26461. 3  | 2. 05787   | coding    |
| MSTRG. 26461. 5  | 1. 07258   | coding    |
| MSTRG. 26469. 2  | 0. 628202  | coding    |
| MSTRG. 26470. 2  | 0. 147518  | coding    |
| MSTRG. 26470. 3  | -0. 855575 | noncoding |
| MSTRG. 26470. 4  | -0. 066535 | noncoding |
| MSTRG. 26515. 1  | -2. 33133  | noncoding |
| MSTRG. 26515. 2  | -2. 52102  | noncoding |
| MSTRG. 26515. 3  | -2. 4331   | noncoding |
| MSTRG. 26521. 1  | -2. 22547  | noncoding |
| MSTRG. 26533. 1  | -1. 49533  | noncoding |
| MSTRG. 26541. 1  | -1. 81118  | noncoding |
| MSTRG. 26567. 1  | -1. 74704  | noncoding |
| MSTRG. 26569. 2  | 0. 06042   | coding    |
| MSTRG. 26569. 5  | 0. 198519  | coding    |
| MSTRG. 26569. 6  | 0. 157969  | coding    |
| MSTRG. 26569. 7  | 0. 067433  | coding    |
| MSTRG. 26569. 8  | 0. 474954  | coding    |
| MSTRG. 26569. 3  | 0. 577956  | coding    |
| MSTRG. 26569. 4  | 0. 39369   | coding    |
| MSTRG. 26569. 10 | 0. 088687  | coding    |
| MSTRG. 26569. 11 | 0. 21036   | coding    |
| MSTRG. 26569. 12 | 0. 471582  | coding    |
| MSTRG. 26569. 9  | 0. 241555  | coding    |
| MSTRG. 26570. 1  | -0. 378722 | noncoding |
| MSTRG. 26571. 1  | 0. 109316  | coding    |
| MSTRG. 26571. 2  | -0. 059574 | noncoding |
| MSTRG. 26573. 1  | 1. 28001   | coding    |
| MSTRG. 26574. 1  | -0. 698385 | noncoding |
| MSTRG. 26574. 2  | -0. 124976 | noncoding |
| MSTRG. 26571. 3  | 0. 255167  | coding    |
| MSTRG. 26572. 4  | -0. 477064 | noncoding |
| MSTRG. 26572. 5  | -0. 443937 | noncoding |
| MSTRG. 26572. 6  | 0. 709739  | coding    |
| MSTRG. 26572. 7  | -0. 251227 | noncoding |
| MSTRG. 26572. 8  | 0. 475442  | coding    |
| MSTRG. 26572. 9  | -1. 14765  | noncoding |
| MSTRG. 26572. 10 | 0. 359485  | coding    |
| MSTRG. 26572. 11 | 0. 068373  | coding    |
| MSTRG. 26572. 12 | 1. 04202   | coding    |
| MSTRG. 26572. 13 | 0. 932098  | coding    |
| MSTRG. 26572. 14 | -0. 206236 | noncoding |
| MSTRG. 26572. 15 | -1. 2435   | noncoding |
| MSTRG. 26572. 16 | -1. 50287  | noncoding |

|                  |            |           |
|------------------|------------|-----------|
| MSTRG. 26572. 17 | -1. 53456  | noncoding |
| MSTRG. 26575. 1  | 1. 10316   | coding    |
| MSTRG. 26542. 4  | 2. 5784    | coding    |
| MSTRG. 26542. 3  | 2. 5876    | coding    |
| MSTRG. 26542. 6  | -1. 08567  | noncoding |
| MSTRG. 26552. 3  | 1. 11235   | coding    |
| MSTRG. 26552. 5  | 0. 952793  | coding    |
| MSTRG. 26553. 2  | 1. 67328   | coding    |
| MSTRG. 26553. 1  | 1. 45844   | coding    |
| MSTRG. 26554. 2  | 1. 18798   | coding    |
| MSTRG. 26554. 1  | 1. 11782   | coding    |
| MSTRG. 26554. 4  | 1. 17108   | coding    |
| MSTRG. 26554. 3  | 1. 1821    | coding    |
| MSTRG. 26554. 5  | 1. 07616   | coding    |
| MSTRG. 26555. 3  | 2. 18795   | coding    |
| MSTRG. 26557. 2  | 1. 87153   | coding    |
| MSTRG. 26546. 1  | 1. 66489   | coding    |
| MSTRG. 26547. 1  | 0. 338118  | coding    |
| MSTRG. 26547. 2  | -0. 09791  | noncoding |
| MSTRG. 26548. 3  | 1. 90792   | coding    |
| MSTRG. 26548. 5  | 2. 21345   | coding    |
| MSTRG. 26560. 1  | 0. 661822  | coding    |
| MSTRG. 26563. 1  | 2. 37319   | coding    |
| MSTRG. 26586. 3  | 3. 27317   | coding    |
| MSTRG. 26593. 1  | 1. 26256   | coding    |
| MSTRG. 26585. 2  | 1. 37852   | coding    |
| MSTRG. 26594. 3  | 1. 87434   | coding    |
| MSTRG. 26595. 1  | 2. 67648   | coding    |
| MSTRG. 26596. 1  | -0. 54749  | noncoding |
| MSTRG. 26598. 1  | 1. 39479   | coding    |
| MSTRG. 26602. 2  | 2. 26218   | coding    |
| MSTRG. 26602. 3  | 1. 85807   | coding    |
| MSTRG. 26601. 2  | 1. 53011   | coding    |
| MSTRG. 26611. 2  | 0. 072371  | coding    |
| MSTRG. 26614. 1  | -0. 189908 | noncoding |
| MSTRG. 26615. 1  | -1. 72081  | noncoding |
| MSTRG. 26615. 2  | -2. 37055  | noncoding |
| MSTRG. 26616. 1  | -0. 65794  | noncoding |
| MSTRG. 26616. 2  | -1. 34086  | noncoding |
| MSTRG. 26617. 2  | 1. 35194   | coding    |
| MSTRG. 26617. 3  | 0. 382474  | coding    |
| MSTRG. 26617. 4  | 1. 45027   | coding    |
| MSTRG. 26620. 4  | -0. 596276 | noncoding |
| MSTRG. 26624. 4  | 2. 03955   | coding    |
| MSTRG. 26623. 3  | 0. 864131  | coding    |
| MSTRG. 26630. 3  | 1. 71027   | coding    |
| MSTRG. 26630. 2  | 2. 39758   | coding    |
| MSTRG. 26630. 4  | 2. 76937   | coding    |
| MSTRG. 26636. 2  | 0. 486695  | coding    |
| MSTRG. 26637. 4  | 1. 08251   | coding    |
| MSTRG. 26637. 5  | 1. 93102   | coding    |
| MSTRG. 26644. 1  | 2. 04518   | coding    |
| MSTRG. 26645. 1  | -0. 915016 | noncoding |
| MSTRG. 26644. 2  | 2. 06675   | coding    |



|                  |            |           |
|------------------|------------|-----------|
| MSTRG. 26644. 5  | 1. 36906   | coding    |
| MSTRG. 26642. 1  | 0. 700488  | coding    |
| MSTRG. 26643. 1  | -0. 054996 | noncoding |
| MSTRG. 26646. 1  | -0. 390582 | noncoding |
| MSTRG. 26647. 1  | -0. 34798  | noncoding |
| MSTRG. 26647. 2  | 0. 236055  | coding    |
| MSTRG. 26651. 1  | -2. 49328  | noncoding |
| MSTRG. 26652. 1  | -0. 935323 | noncoding |
| MSTRG. 26657. 2  | 0. 938194  | coding    |
| MSTRG. 26658. 2  | -0. 724388 | noncoding |
| MSTRG. 26660. 2  | 2. 22386   | coding    |
| MSTRG. 26660. 1  | 2. 08105   | coding    |
| MSTRG. 26660. 8  | 1. 5032    | coding    |
| MSTRG. 26660. 6  | 1. 41797   | coding    |
| MSTRG. 26660. 10 | 1. 88207   | coding    |
| MSTRG. 26660. 11 | 0. 147173  | coding    |
| MSTRG. 26660. 12 | 1. 13699   | coding    |
| MSTRG. 26665. 1  | -1. 16737  | noncoding |
| MSTRG. 26662. 1  | -1. 67054  | noncoding |
| MSTRG. 26667. 1  | -2. 46194  | noncoding |
| MSTRG. 26668. 1  | -1. 05454  | noncoding |
| MSTRG. 26671. 1  | -0. 649547 | noncoding |
| MSTRG. 26675. 2  | 1. 89836   | coding    |
| MSTRG. 26675. 6  | 1. 98574   | coding    |
| MSTRG. 26675. 7  | 1. 69339   | coding    |
| MSTRG. 26675. 5  | 1. 70034   | coding    |
| MSTRG. 26675. 8  | 2. 29643   | coding    |
| MSTRG. 26675. 11 | 1. 43749   | coding    |
| MSTRG. 26675. 12 | 0. 606666  | coding    |
| MSTRG. 26677. 2  | 0. 674609  | coding    |
| MSTRG. 26677. 1  | -2. 00832  | noncoding |
| MSTRG. 26680. 2  | 1. 17883   | coding    |
| MSTRG. 26684. 1  | 1. 37632   | coding    |
| MSTRG. 26684. 2  | 0. 919652  | coding    |
| MSTRG. 26684. 4  | 0. 670408  | coding    |
| MSTRG. 26684. 6  | 1. 86285   | coding    |
| MSTRG. 26685. 3  | 2. 07065   | coding    |
| MSTRG. 26685. 2  | 2. 4501    | coding    |
| MSTRG. 26686. 1  | 1. 57727   | coding    |
| MSTRG. 26688. 1  | 0. 225183  | coding    |
| MSTRG. 26707. 1  | -2. 1577   | noncoding |
| MSTRG. 26709. 1  | -0. 566501 | noncoding |
| MSTRG. 26710. 1  | 1. 82563   | coding    |
| MSTRG. 26710. 3  | 1. 33122   | coding    |
| MSTRG. 26710. 11 | 2. 61665   | coding    |
| MSTRG. 26710. 12 | 2. 10033   | coding    |
| MSTRG. 26711. 1  | -1. 07737  | noncoding |
| MSTRG. 26708. 1  | -0. 07872  | noncoding |
| MSTRG. 26715. 1  | 0. 305437  | coding    |
| MSTRG. 26715. 2  | -0. 456203 | noncoding |
| MSTRG. 26715. 3  | -0. 040117 | noncoding |
| MSTRG. 26715. 4  | 0. 152252  | coding    |
| MSTRG. 26715. 7  | 0. 192053  | coding    |
| MSTRG. 26715. 8  | 0. 167829  | coding    |

|                  |            |           |
|------------------|------------|-----------|
| MSTRG. 26715. 9  | -0. 178733 | noncoding |
| MSTRG. 26720. 2  | 0. 142617  | coding    |
| MSTRG. 26720. 5  | 1. 1717    | coding    |
| MSTRG. 26720. 6  | 0. 846281  | coding    |
| MSTRG. 26720. 7  | 1. 01978   | coding    |
| MSTRG. 26712. 4  | 1. 3064    | coding    |
| MSTRG. 26712. 3  | 1. 46313   | coding    |
| MSTRG. 26712. 2  | 1. 53691   | coding    |
| MSTRG. 26713. 1  | -0. 547484 | noncoding |
| MSTRG. 26722. 2  | 0. 365766  | coding    |
| MSTRG. 26722. 3  | 0. 227449  | coding    |
| MSTRG. 26722. 4  | -0. 623678 | noncoding |
| MSTRG. 26725. 5  | 1. 58776   | coding    |
| MSTRG. 26725. 6  | 1. 44304   | coding    |
| MSTRG. 26725. 8  | 0. 894259  | coding    |
| MSTRG. 26726. 2  | 1. 1287    | coding    |
| MSTRG. 26726. 1  | -0. 324395 | noncoding |
| MSTRG. 26727. 1  | 0. 623888  | coding    |
| MSTRG. 26727. 2  | 0. 51863   | coding    |
| MSTRG. 26727. 4  | 1. 12275   | coding    |
| MSTRG. 26727. 3  | 1. 88122   | coding    |
| MSTRG. 26727. 5  | 1. 72527   | coding    |
| MSTRG. 26728. 1  | -0. 054304 | noncoding |
| MSTRG. 26728. 2  | 0. 71584   | coding    |
| MSTRG. 26729. 1  | 1. 81481   | coding    |
| MSTRG. 26739. 3  | 1. 22547   | coding    |
| MSTRG. 26739. 4  | 2. 1832    | coding    |
| MSTRG. 26739. 5  | 2. 36863   | coding    |
| MSTRG. 26741. 1  | -0. 696042 | noncoding |
| MSTRG. 26744. 1  | 1. 93242   | coding    |
| MSTRG. 26744. 4  | 2. 53535   | coding    |
| MSTRG. 26742. 2  | 1. 1882    | coding    |
| MSTRG. 26742. 3  | 1. 12457   | coding    |
| MSTRG. 26748. 1  | 0. 651197  | coding    |
| MSTRG. 26749. 1  | 1. 3814    | coding    |
| MSTRG. 26749. 2  | 1. 21375   | coding    |
| MSTRG. 26751. 1  | 1. 22793   | coding    |
| MSTRG. 26751. 4  | -1. 02257  | noncoding |
| MSTRG. 26751. 6  | 0. 212975  | coding    |
| MSTRG. 26751. 5  | 0. 911333  | coding    |
| MSTRG. 26751. 7  | 1. 00179   | coding    |
| MSTRG. 26751. 3  | 0. 871243  | coding    |
| MSTRG. 26751. 8  | -0. 616585 | noncoding |
| MSTRG. 26753. 1  | 0. 474713  | coding    |
| MSTRG. 26751. 9  | 0. 492325  | coding    |
| MSTRG. 26754. 1  | 0. 247043  | coding    |
| MSTRG. 26757. 2  | 1. 55326   | coding    |
| MSTRG. 26773. 20 | -0. 874974 | noncoding |
| MSTRG. 26774. 2  | 0. 99915   | coding    |
| MSTRG. 26776. 1  | -1. 30341  | noncoding |
| MSTRG. 26777. 2  | 2. 18848   | coding    |
| MSTRG. 26777. 3  | 2. 13845   | coding    |
| MSTRG. 26765. 1  | -2. 46979  | noncoding |
| MSTRG. 26770. 1  | -0. 127204 | noncoding |

|                 |            |           |
|-----------------|------------|-----------|
| MSTRG. 26770. 2 | -0. 243973 | noncoding |
| MSTRG. 26790. 1 | 1. 78707   | coding    |
| MSTRG. 26790. 3 | 2. 29055   | coding    |
| MSTRG. 26788. 2 | -0. 388497 | noncoding |
| MSTRG. 26786. 1 | 0. 901162  | coding    |
| MSTRG. 26792. 3 | 1. 4467    | coding    |
| MSTRG. 26792. 4 | 1. 48199   | coding    |
| MSTRG. 26793. 2 | -1. 26985  | noncoding |
| MSTRG. 26793. 3 | -1. 28877  | noncoding |
| MSTRG. 26795. 2 | 0. 508826  | coding    |
| MSTRG. 26795. 3 | 0. 832078  | coding    |
| MSTRG. 26796. 1 | -0. 024717 | noncoding |
| MSTRG. 26796. 2 | 0. 456062  | coding    |
| MSTRG. 26796. 3 | 0. 227448  | coding    |
| MSTRG. 26798. 2 | 0. 324101  | coding    |
| MSTRG. 26803. 3 | 1. 87102   | coding    |
| MSTRG. 26804. 1 | -0. 78291  | noncoding |
| MSTRG. 26805. 1 | -1. 44085  | noncoding |
| MSTRG. 26806. 7 | 0. 393566  | coding    |
| MSTRG. 26806. 8 | 0. 392171  | coding    |
| MSTRG. 26806. 4 | 0. 262508  | coding    |
| MSTRG. 26806. 5 | 0. 196503  | coding    |
| MSTRG. 26808. 1 | 0. 662148  | coding    |
| MSTRG. 26808. 2 | 0. 68939   | coding    |
| MSTRG. 26821. 1 | 0. 622081  | coding    |
| MSTRG. 26821. 3 | -1. 28127  | noncoding |
| MSTRG. 26821. 4 | -1. 09099  | noncoding |
| MSTRG. 26821. 5 | -1. 18991  | noncoding |
| MSTRG. 26821. 6 | -0. 895768 | noncoding |
| MSTRG. 26830. 1 | 0. 15204   | coding    |
| MSTRG. 26830. 2 | -0. 198444 | noncoding |
| MSTRG. 26830. 3 | -0. 008883 | noncoding |
| MSTRG. 26828. 2 | 1. 52687   | coding    |
| MSTRG. 26835. 2 | -0. 598863 | noncoding |
| MSTRG. 26836. 2 | 2. 28958   | coding    |
| MSTRG. 26836. 3 | -1. 15849  | noncoding |
| MSTRG. 26837. 2 | 3. 09677   | coding    |
| MSTRG. 26837. 4 | 2. 66749   | coding    |
| MSTRG. 26837. 5 | 1. 45666   | coding    |
| MSTRG. 26841. 1 | -0. 956185 | noncoding |
| MSTRG. 26843. 2 | 1. 30458   | coding    |
| MSTRG. 26844. 1 | 0. 368626  | coding    |
| MSTRG. 26845. 1 | 0. 128298  | coding    |
| MSTRG. 26853. 1 | -0. 250654 | noncoding |
| MSTRG. 26838. 1 | -0. 387668 | noncoding |
| MSTRG. 26855. 1 | -0. 942427 | noncoding |
| MSTRG. 26856. 1 | -1. 95885  | noncoding |
| MSTRG. 26863. 4 | 0. 08671   | coding    |
| MSTRG. 26863. 5 | 1. 14766   | coding    |
| MSTRG. 26864. 1 | -0. 603587 | noncoding |
| MSTRG. 26865. 1 | -0. 335435 | noncoding |
| MSTRG. 26866. 1 | -0. 664285 | noncoding |
| MSTRG. 26867. 1 | -0. 309494 | noncoding |
| MSTRG. 26868. 1 | -1. 17105  | noncoding |

|                  |            |           |
|------------------|------------|-----------|
| MSTRG. 26868. 2  | 0. 189952  | coding    |
| MSTRG. 26868. 3  | -0. 119636 | noncoding |
| MSTRG. 26870. 1  | -1. 56369  | noncoding |
| MSTRG. 26858. 1  | -2. 64927  | noncoding |
| MSTRG. 26861. 1  | -2. 04093  | noncoding |
| MSTRG. 26861. 2  | -1. 19528  | noncoding |
| MSTRG. 26889. 8  | 1. 18822   | coding    |
| MSTRG. 26889. 9  | 1. 48464   | coding    |
| MSTRG. 26889. 4  | 1. 48957   | coding    |
| MSTRG. 26889. 7  | 1. 59047   | coding    |
| MSTRG. 26889. 6  | 1. 74091   | coding    |
| MSTRG. 26889. 5  | 1. 70744   | coding    |
| MSTRG. 26889. 3  | 1. 37481   | coding    |
| MSTRG. 26889. 2  | 2. 07332   | coding    |
| MSTRG. 26889. 10 | -1. 06684  | noncoding |
| MSTRG. 26889. 11 | 0. 707159  | coding    |
| MSTRG. 26890. 1  | -1. 57667  | noncoding |
| MSTRG. 26889. 12 | 0. 977802  | coding    |
| MSTRG. 26891. 1  | 0. 594424  | coding    |
| MSTRG. 26892. 1  | 0. 385853  | coding    |
| MSTRG. 26894. 1  | -0. 242245 | noncoding |
| MSTRG. 26879. 2  | 1. 30321   | coding    |
| MSTRG. 26879. 3  | 0. 740554  | coding    |
| MSTRG. 26880. 2  | 0. 250559  | coding    |
| MSTRG. 26898. 1  | -0. 187045 | noncoding |
| MSTRG. 26903. 2  | 1. 53706   | coding    |
| MSTRG. 26904. 1  | -1. 31739  | noncoding |
| MSTRG. 26902. 1  | 1. 85578   | coding    |
| MSTRG. 26910. 3  | 0. 004818  | coding    |
| MSTRG. 26910. 4  | 0. 330613  | coding    |
| MSTRG. 26910. 5  | 0. 17102   | coding    |
| MSTRG. 26919. 8  | 2. 10026   | coding    |
| MSTRG. 26919. 5  | 2. 55748   | coding    |
| MSTRG. 26919. 1  | 2. 85026   | coding    |
| MSTRG. 26919. 2  | 2. 85154   | coding    |
| MSTRG. 26919. 3  | 2. 89997   | coding    |
| MSTRG. 26919. 7  | 2. 80048   | coding    |
| MSTRG. 26919. 9  | 2. 7733    | coding    |
| MSTRG. 26919. 10 | 2. 9293    | coding    |
| MSTRG. 26920. 1  | -0. 548695 | noncoding |
| MSTRG. 26932. 1  | 0. 995284  | coding    |
| MSTRG. 26932. 4  | 1. 21558   | coding    |
| MSTRG. 26932. 5  | 1. 37332   | coding    |
| MSTRG. 26932. 7  | 2. 16494   | coding    |
| MSTRG. 26932. 6  | 2. 3119    | coding    |
| MSTRG. 26932. 8  | 1. 70631   | coding    |
| MSTRG. 26932. 9  | 1. 80577   | coding    |
| MSTRG. 26932. 10 | 1. 11486   | coding    |
| MSTRG. 26933. 3  | 2. 15998   | coding    |
| MSTRG. 26937. 2  | 2. 8455    | coding    |
| MSTRG. 26937. 5  | 2. 53791   | coding    |
| MSTRG. 26929. 1  | 2. 30784   | coding    |
| MSTRG. 26929. 2  | 1. 93755   | coding    |
| MSTRG. 26930. 1  | -1. 11047  | noncoding |

|                  |            |           |
|------------------|------------|-----------|
| MSTRG. 26941. 9  | 1. 36945   | coding    |
| MSTRG. 26941. 8  | 2. 71871   | coding    |
| MSTRG. 26941. 10 | 2. 73292   | coding    |
| MSTRG. 26941. 11 | 2. 73258   | coding    |
| MSTRG. 26941. 13 | 2. 17295   | coding    |
| MSTRG. 26941. 14 | 0. 199814  | coding    |
| MSTRG. 26941. 15 | 0. 822676  | coding    |
| MSTRG. 26942. 1  | 1. 39191   | coding    |
| MSTRG. 26943. 1  | -0. 463209 | noncoding |
| MSTRG. 26942. 3  | 1. 25793   | coding    |
| MSTRG. 26945. 1  | 2. 41257   | coding    |
| MSTRG. 26944. 11 | -0. 262404 | noncoding |
| MSTRG. 26953. 3  | 0. 282729  | coding    |
| MSTRG. 26953. 2  | 1. 35541   | coding    |
| MSTRG. 26954. 1  | 0. 805281  | coding    |
| MSTRG. 26955. 2  | 1. 92605   | coding    |
| MSTRG. 26955. 1  | 2. 37422   | coding    |
| MSTRG. 26955. 3  | 1. 5866    | coding    |
| MSTRG. 26955. 5  | 2. 49751   | coding    |
| MSTRG. 26957. 1  | -0. 122993 | noncoding |
| MSTRG. 26962. 1  | -3. 02126  | noncoding |
| MSTRG. 26974. 1  | 3. 11669   | coding    |
| MSTRG. 26988. 1  | 1. 05762   | coding    |
| MSTRG. 26988. 2  | -0. 341724 | noncoding |
| MSTRG. 26990. 1  | 0. 827688  | coding    |
| MSTRG. 26990. 2  | 1. 31831   | coding    |
| MSTRG. 26990. 3  | 1. 16213   | coding    |
| MSTRG. 26994. 1  | 0. 254153  | coding    |
| MSTRG. 26990. 4  | 1. 6465    | coding    |
| MSTRG. 26990. 6  | -0. 725973 | noncoding |
| MSTRG. 26990. 5  | 1. 18465   | coding    |
| MSTRG. 26997. 1  | 0. 540618  | coding    |
| MSTRG. 26998. 1  | -0. 838768 | noncoding |
| MSTRG. 27003. 4  | 1. 97314   | coding    |
| MSTRG. 27006. 6  | 0. 450527  | coding    |
| MSTRG. 27006. 8  | 0. 547403  | coding    |
| MSTRG. 27006. 9  | 0. 459857  | coding    |
| MSTRG. 27006. 7  | 0. 671178  | coding    |
| MSTRG. 27006. 5  | 1. 22302   | coding    |
| MSTRG. 27006. 4  | 1. 66962   | coding    |
| MSTRG. 27006. 2  | 1. 46665   | coding    |
| MSTRG. 27007. 1  | -0. 799818 | noncoding |
| MSTRG. 27008. 1  | -0. 74882  | noncoding |
| MSTRG. 27011. 1  | -1. 14757  | noncoding |
| MSTRG. 27002. 4  | 2. 10387   | coding    |
| MSTRG. 27014. 1  | -0. 473198 | noncoding |
| MSTRG. 27017. 6  | 1. 11865   | coding    |
| MSTRG. 27017. 5  | 0. 650187  | coding    |
| MSTRG. 27017. 7  | 1. 66813   | coding    |
| MSTRG. 27018. 1  | -0. 266751 | noncoding |
| MSTRG. 27017. 9  | 1. 73066   | coding    |
| MSTRG. 27017. 10 | -1. 06384  | noncoding |
| MSTRG. 27017. 11 | -1. 18753  | noncoding |
| MSTRG. 27012. 3  | 1. 82682   | coding    |

|                  |            |           |
|------------------|------------|-----------|
| MSTRG. 27012. 2  | 1. 87488   | coding    |
| MSTRG. 27019. 2  | 1. 0546    | coding    |
| MSTRG. 27021. 2  | 0. 205965  | coding    |
| MSTRG. 27023. 1  | 0. 414444  | coding    |
| MSTRG. 27027. 1  | -1. 77193  | noncoding |
| MSTRG. 27027. 2  | -1. 87845  | noncoding |
| MSTRG. 27029. 1  | -1. 87595  | noncoding |
| MSTRG. 27031. 2  | 2. 44185   | coding    |
| MSTRG. 27035. 4  | -1. 31307  | noncoding |
| MSTRG. 27035. 6  | 0. 58728   | coding    |
| MSTRG. 27035. 3  | 1. 99333   | coding    |
| MSTRG. 27035. 5  | 1. 92731   | coding    |
| MSTRG. 27035. 7  | 0. 169293  | coding    |
| MSTRG. 27038. 2  | 0. 713339  | coding    |
| MSTRG. 27038. 3  | 0. 792891  | coding    |
| MSTRG. 27038. 4  | 0. 777383  | coding    |
| MSTRG. 27038. 5  | 0. 73984   | coding    |
| MSTRG. 27039. 1  | -1. 02635  | noncoding |
| MSTRG. 27039. 2  | -1. 43059  | noncoding |
| MSTRG. 27069. 1  | 0. 16497   | coding    |
| MSTRG. 27069. 2  | 1. 48476   | coding    |
| MSTRG. 27069. 3  | 0. 816308  | coding    |
| MSTRG. 27042. 2  | 1. 51967   | coding    |
| MSTRG. 27043. 1  | 1. 19718   | coding    |
| MSTRG. 27045. 4  | 1. 13521   | coding    |
| MSTRG. 27045. 5  | 1. 2517    | coding    |
| MSTRG. 27045. 6  | 2. 09204   | coding    |
| MSTRG. 27045. 7  | 1. 8962    | coding    |
| MSTRG. 27045. 8  | 1. 68916   | coding    |
| MSTRG. 27073. 2  | 1. 2267    | coding    |
| MSTRG. 27073. 5  | 1. 1876    | coding    |
| MSTRG. 27073. 6  | 1. 50228   | coding    |
| MSTRG. 27073. 7  | 1. 34492   | coding    |
| MSTRG. 27073. 8  | 1. 33948   | coding    |
| MSTRG. 27073. 9  | 1. 04383   | coding    |
| MSTRG. 27051. 1  | -2. 03431  | noncoding |
| MSTRG. 27078. 1  | 0. 598996  | coding    |
| MSTRG. 27083. 2  | -0. 412978 | noncoding |
| MSTRG. 27083. 3  | -0. 511773 | noncoding |
| MSTRG. 27085. 4  | 2. 29955   | coding    |
| MSTRG. 27086. 2  | 0. 162092  | coding    |
| MSTRG. 27098. 1  | 0. 598884  | coding    |
| MSTRG. 27098. 2  | 0. 408621  | coding    |
| MSTRG. 27098. 3  | 0. 553303  | coding    |
| MSTRG. 27099. 1  | -0. 765421 | noncoding |
| MSTRG. 27099. 2  | -1. 35634  | noncoding |
| MSTRG. 27101. 3  | 2. 33178   | coding    |
| MSTRG. 27101. 2  | 2. 44873   | coding    |
| MSTRG. 27101. 1  | 2. 50186   | coding    |
| MSTRG. 27101. 4  | 2. 43761   | coding    |
| MSTRG. 27101. 5  | 2. 68863   | coding    |
| MSTRG. 27101. 10 | 2. 38583   | coding    |
| MSTRG. 27101. 11 | 2. 48181   | coding    |
| MSTRG. 27101. 12 | 2. 40176   | coding    |

|                 |           |           |
|-----------------|-----------|-----------|
| MSTRG. 27101.8  | 2.40209   | coding    |
| MSTRG. 27101.14 | 2.82585   | coding    |
| MSTRG. 27101.16 | 2.50658   | coding    |
| MSTRG. 27103.1  | -1.43485  | noncoding |
| MSTRG. 27104.1  | 1.26117   | coding    |
| MSTRG. 27104.2  | 1.49962   | coding    |
| MSTRG. 27104.3  | 2.04091   | coding    |
| MSTRG. 27104.4  | 2.04169   | coding    |
| MSTRG. 27104.5  | 1.25026   | coding    |
| MSTRG. 27104.6  | 1.22078   | coding    |
| MSTRG. 27101.17 | 1.79701   | coding    |
| MSTRG. 27091.2  | 0.677451  | coding    |
| MSTRG. 27092.1  | -0.005696 | noncoding |
| MSTRG. 27092.2  | -0.132525 | noncoding |
| MSTRG. 27092.3  | -0.190846 | noncoding |
| MSTRG. 27092.4  | -0.042586 | noncoding |
| MSTRG. 27092.5  | 0.279672  | coding    |
| MSTRG. 27092.6  | -0.090723 | noncoding |
| MSTRG. 27094.1  | -0.789421 | noncoding |
| MSTRG. 27092.7  | -0.038998 | noncoding |
| MSTRG. 27114.1  | 1.41358   | coding    |
| MSTRG. 27118.1  | 1.43024   | coding    |
| MSTRG. 27118.2  | -0.800017 | noncoding |
| MSTRG. 27119.1  | 0.268649  | coding    |
| MSTRG. 27119.2  | 0.188375  | coding    |
| MSTRG. 27118.3  | 0.745224  | coding    |
| MSTRG. 27118.4  | 0.580453  | coding    |
| MSTRG. 27123.1  | -1.06502  | noncoding |
| MSTRG. 27124.2  | 2.24707   | coding    |
| MSTRG. 27124.5  | -0.13742  | noncoding |
| MSTRG. 27125.1  | -0.659644 | noncoding |
| MSTRG. 27124.6  | 2.101     | coding    |
| MSTRG. 27124.7  | -0.972717 | noncoding |
| MSTRG. 27106.1  | 0.390059  | coding    |
| MSTRG. 27109.1  | 0.349486  | coding    |
| MSTRG. 27129.1  | -2.30961  | noncoding |
| MSTRG. 27143.1  | -2.16773  | noncoding |
| MSTRG. 27144.1  | -1.04689  | noncoding |
| MSTRG. 27150.1  | 0.088224  | coding    |
| MSTRG. 27156.1  | -0.645678 | noncoding |
| MSTRG. 27157.2  | -0.038945 | noncoding |
| MSTRG. 27179.1  | -1.49267  | noncoding |
| MSTRG. 27191.1  | 1.60825   | coding    |
| MSTRG. 27192.1  | 0.71157   | coding    |
| MSTRG. 27192.3  | 0.849002  | coding    |
| MSTRG. 27192.2  | 1.26634   | coding    |
| MSTRG. 27194.1  | -0.496204 | noncoding |
| MSTRG. 27198.1  | 1.0333    | coding    |
| MSTRG. 27202.5  | 1.96277   | coding    |
| MSTRG. 27217.1  | -0.989981 | noncoding |
| MSTRG. 27217.2  | 0.283099  | coding    |
| MSTRG. 27212.1  | -0.668126 | noncoding |
| MSTRG. 27221.2  | 1.71587   | coding    |
| MSTRG. 27222.1  | -0.594863 | noncoding |

|                  |            |           |
|------------------|------------|-----------|
| MSTRG. 27223. 1  | -0. 319177 | noncoding |
| MSTRG. 27226. 1  | 1. 78291   | coding    |
| MSTRG. 27226. 4  | 0. 611948  | coding    |
| MSTRG. 27226. 5  | -0. 267312 | noncoding |
| MSTRG. 27230. 2  | 0. 333179  | coding    |
| MSTRG. 27230. 4  | -1. 67815  | noncoding |
| MSTRG. 27230. 9  | 0. 662898  | coding    |
| MSTRG. 27230. 16 | -0. 999729 | noncoding |
| MSTRG. 27230. 17 | -1. 04186  | noncoding |
| MSTRG. 27239. 1  | 0. 777244  | coding    |
| MSTRG. 27239. 2  | 0. 236802  | coding    |
| MSTRG. 27282. 1  | 0. 182298  | coding    |
| MSTRG. 27282. 3  | 0. 991073  | coding    |
| MSTRG. 27282. 11 | -0. 411084 | noncoding |
| MSTRG. 27282. 10 | -0. 722809 | noncoding |
| MSTRG. 27282. 12 | 0. 346161  | coding    |
| MSTRG. 27282. 14 | 0. 087683  | coding    |
| MSTRG. 27282. 15 | -0. 132978 | noncoding |
| MSTRG. 27285. 1  | 0. 397733  | coding    |
| MSTRG. 27282. 16 | -0. 474168 | noncoding |
| MSTRG. 27282. 20 | 0. 886162  | coding    |
| MSTRG. 27282. 21 | 0. 157678  | coding    |
| MSTRG. 27282. 18 | 1. 47011   | coding    |
| MSTRG. 27288. 1  | -1. 65854  | noncoding |
| MSTRG. 27291. 1  | 2. 04342   | coding    |
| MSTRG. 27291. 2  | -0. 427087 | noncoding |
| MSTRG. 27292. 1  | -0. 306979 | noncoding |
| MSTRG. 27293. 1  | -1. 27465  | noncoding |
| MSTRG. 27291. 7  | 2. 50587   | coding    |
| MSTRG. 27291. 8  | 2. 49927   | coding    |
| MSTRG. 27247. 3  | 0. 746545  | coding    |
| MSTRG. 27247. 2  | 0. 723585  | coding    |
| MSTRG. 27248. 1  | 1. 05688   | coding    |
| MSTRG. 27250. 1  | -0. 360189 | noncoding |
| MSTRG. 27251. 1  | 1. 45555   | coding    |
| MSTRG. 27255. 2  | 2. 11565   | coding    |
| MSTRG. 27256. 1  | -0. 873148 | noncoding |
| MSTRG. 27263. 1  | 0. 088435  | coding    |
| MSTRG. 27264. 1  | -0. 897851 | noncoding |
| MSTRG. 27263. 2  | -0. 171612 | noncoding |
| MSTRG. 27263. 3  | 1. 99399   | coding    |
| MSTRG. 27268. 1  | -1. 36381  | noncoding |
| MSTRG. 27272. 1  | -0. 694035 | noncoding |
| MSTRG. 27276. 1  | 0. 12225   | coding    |
| MSTRG. 27275. 2  | 1. 02509   | coding    |
| MSTRG. 27304. 3  | 0. 354839  | coding    |
| MSTRG. 27305. 1  | 0. 702014  | coding    |
| MSTRG. 27305. 2  | 0. 659464  | coding    |
| MSTRG. 27305. 3  | 0. 418046  | coding    |
| MSTRG. 27305. 4  | 0. 586582  | coding    |
| MSTRG. 27305. 5  | 0. 657539  | coding    |
| MSTRG. 27305. 6  | -0. 267967 | noncoding |
| MSTRG. 27304. 6  | 0. 136899  | coding    |
| MSTRG. 27304. 7  | 1. 01465   | coding    |



|                  |            |           |
|------------------|------------|-----------|
| MSTRG. 27304. 8  | 0. 249339  | coding    |
| MSTRG. 27304. 9  | 0. 237358  | coding    |
| MSTRG. 27304. 10 | 2. 67304   | coding    |
| MSTRG. 27304. 11 | 1. 53796   | coding    |
| MSTRG. 27304. 12 | 0. 143069  | coding    |
| MSTRG. 27307. 1  | 0. 557811  | coding    |
| MSTRG. 27304. 13 | 0. 229673  | coding    |
| MSTRG. 27308. 1  | 0. 875386  | coding    |
| MSTRG. 27308. 2  | -0. 379169 | noncoding |
| MSTRG. 27304. 14 | 1. 23637   | coding    |
| MSTRG. 27309. 1  | 0. 111584  | coding    |
| MSTRG. 27309. 2  | 0. 292987  | coding    |
| MSTRG. 27310. 1  | 0. 382129  | coding    |
| MSTRG. 27311. 1  | -1. 82925  | noncoding |
| MSTRG. 27277. 1  | -0. 798734 | noncoding |
| MSTRG. 27278. 1  | -0. 623322 | noncoding |
| MSTRG. 27300. 3  | 2. 06294   | coding    |
| MSTRG. 27300. 4  | 2. 0316    | coding    |
| MSTRG. 27300. 5  | 2. 16476   | coding    |
| MSTRG. 27302. 1  | -0. 201017 | noncoding |
| MSTRG. 27303. 5  | -0. 415052 | noncoding |
| MSTRG. 27312. 1  | 0. 955991  | coding    |
| MSTRG. 27314. 2  | 0. 515901  | coding    |
| MSTRG. 27314. 3  | -1. 76582  | noncoding |
| MSTRG. 27329. 1  | 0. 309145  | coding    |
| MSTRG. 27329. 2  | -0. 085718 | noncoding |
| MSTRG. 27328. 4  | -0. 33733  | noncoding |
| MSTRG. 27330. 1  | 0. 888224  | coding    |
| MSTRG. 27368. 2  | -1. 65284  | noncoding |
| MSTRG. 27368. 3  | -0. 477754 | noncoding |
| MSTRG. 27368. 4  | 0. 983102  | coding    |
| MSTRG. 27368. 5  | -0. 626786 | noncoding |
| MSTRG. 27368. 6  | 0. 798976  | coding    |
| MSTRG. 27370. 1  | 0. 040687  | coding    |
| MSTRG. 27368. 7  | 0. 749412  | coding    |
| MSTRG. 27373. 1  | 0. 917391  | coding    |
| MSTRG. 27337. 1  | -0. 636493 | noncoding |
| MSTRG. 27338. 3  | 2. 01211   | coding    |
| MSTRG. 27338. 4  | 2. 32336   | coding    |
| MSTRG. 27339. 1  | -1. 49557  | noncoding |
| MSTRG. 27340. 1  | -0. 205646 | noncoding |
| MSTRG. 27343. 3  | 0. 020554  | coding    |
| MSTRG. 27343. 4  | -0. 01132  | noncoding |
| MSTRG. 27343. 6  | 0. 670835  | coding    |
| MSTRG. 27343. 8  | 0. 386858  | coding    |
| MSTRG. 27359. 4  | 1. 26733   | coding    |
| MSTRG. 27362. 3  | 0. 668549  | coding    |
| MSTRG. 27391. 4  | 2. 09075   | coding    |
| MSTRG. 27391. 2  | 1. 90847   | coding    |
| MSTRG. 27391. 7  | 2. 02502   | coding    |
| MSTRG. 27391. 8  | 1. 78765   | coding    |
| MSTRG. 27391. 10 | 1. 31355   | coding    |
| MSTRG. 27391. 9  | 0. 831906  | coding    |
| MSTRG. 27393. 3  | 0. 384249  | coding    |

|                  |            |           |
|------------------|------------|-----------|
| MSTRG. 27393. 4  | 1. 00205   | coding    |
| MSTRG. 27400. 3  | 2. 71632   | coding    |
| MSTRG. 27400. 4  | 1. 43845   | coding    |
| MSTRG. 27401. 1  | 1. 34854   | coding    |
| MSTRG. 27401. 2  | 1. 36645   | coding    |
| MSTRG. 27401. 3  | 1. 20637   | coding    |
| MSTRG. 27401. 4  | 1. 26242   | coding    |
| MSTRG. 27404. 1  | 1. 15912   | coding    |
| MSTRG. 27411. 2  | 0. 742754  | coding    |
| MSTRG. 27412. 1  | -0. 778041 | noncoding |
| MSTRG. 27411. 3  | 2. 50056   | coding    |
| MSTRG. 27413. 1  | 0. 69883   | coding    |
| MSTRG. 27413. 2  | 0. 112665  | coding    |
| MSTRG. 27413. 3  | 0. 106365  | coding    |
| MSTRG. 27411. 5  | 2. 29748   | coding    |
| MSTRG. 27378. 6  | 0. 195263  | coding    |
| MSTRG. 27378. 7  | 1. 48453   | coding    |
| MSTRG. 27378. 8  | 1. 04545   | coding    |
| MSTRG. 27378. 9  | 0. 707826  | coding    |
| MSTRG. 27387. 1  | -0. 871813 | noncoding |
| MSTRG. 27387. 2  | -1. 33319  | noncoding |
| MSTRG. 27387. 3  | -1. 45042  | noncoding |
| MSTRG. 27387. 4  | -2. 25715  | noncoding |
| MSTRG. 27387. 5  | -2. 26304  | noncoding |
| MSTRG. 27387. 6  | -2. 2108   | noncoding |
| MSTRG. 27387. 7  | 0. 509806  | coding    |
| MSTRG. 27387. 8  | -0. 094412 | noncoding |
| MSTRG. 27387. 9  | -2. 20258  | noncoding |
| MSTRG. 27387. 10 | -2. 19169  | noncoding |
| MSTRG. 27387. 11 | -1. 91925  | noncoding |
| MSTRG. 27420. 1  | 1. 01098   | coding    |
| MSTRG. 27420. 2  | 2. 48094   | coding    |
| MSTRG. 27431. 1  | -2. 57046  | noncoding |
| MSTRG. 27435. 3  | 1. 80951   | coding    |
| MSTRG. 27436. 1  | 0. 663846  | coding    |
| MSTRG. 27440. 1  | -2. 36084  | noncoding |
| MSTRG. 27427. 9  | 2. 36685   | coding    |
| MSTRG. 27427. 8  | 3. 09894   | coding    |
| MSTRG. 27427. 7  | 3. 31208   | coding    |
| MSTRG. 27427. 10 | 2. 49363   | coding    |
| MSTRG. 27427. 11 | 2. 15375   | coding    |
| MSTRG. 27427. 12 | 2. 76729   | coding    |
| MSTRG. 27427. 13 | 2. 71133   | coding    |
| MSTRG. 27428. 2  | -1. 10798  | noncoding |
| MSTRG. 27428. 1  | -1. 32402  | noncoding |
| MSTRG. 27428. 3  | -1. 64618  | noncoding |
| MSTRG. 27428. 4  | -1. 1818   | noncoding |
| MSTRG. 27445. 2  | -1. 01871  | noncoding |
| MSTRG. 27446. 1  | -0. 78782  | noncoding |
| MSTRG. 27449. 1  | 1. 1521    | coding    |
| MSTRG. 27454. 3  | 2. 35719   | coding    |
| MSTRG. 27454. 2  | 2. 28179   | coding    |
| MSTRG. 27459. 1  | -0. 017497 | noncoding |
| MSTRG. 27459. 2  | -0. 380317 | noncoding |

|                  |            |           |
|------------------|------------|-----------|
| MSTRG. 27458. 8  | 0. 800628  | coding    |
| MSTRG. 27461. 1  | 3. 47991   | coding    |
| MSTRG. 27461. 3  | 3. 44004   | coding    |
| MSTRG. 27461. 5  | 2. 81076   | coding    |
| MSTRG. 27461. 6  | 2. 80615   | coding    |
| MSTRG. 27461. 7  | 2. 91521   | coding    |
| MSTRG. 27461. 10 | 3. 21221   | coding    |
| MSTRG. 27461. 11 | 3. 27964   | coding    |
| MSTRG. 27462. 1  | -0. 273175 | noncoding |
| MSTRG. 27462. 2  | -0. 285639 | noncoding |
| MSTRG. 27462. 3  | 0. 852858  | coding    |
| MSTRG. 27457. 3  | 2. 00956   | coding    |
| MSTRG. 27474. 4  | 2. 0383    | coding    |
| MSTRG. 27474. 2  | 1. 98648   | coding    |
| MSTRG. 27474. 6  | 1. 60067   | coding    |
| MSTRG. 27475. 1  | 0. 939559  | coding    |
| MSTRG. 27479. 1  | 2. 54131   | coding    |
| MSTRG. 27480. 2  | 3. 30365   | coding    |
| MSTRG. 27480. 1  | 3. 19849   | coding    |
| MSTRG. 27480. 4  | 3. 23075   | coding    |
| MSTRG. 27480. 5  | 3. 05728   | coding    |
| MSTRG. 27480. 6  | 3. 25889   | coding    |
| MSTRG. 27480. 8  | 3. 35231   | coding    |
| MSTRG. 27480. 9  | 3. 57143   | coding    |
| MSTRG. 27480. 7  | 3. 31308   | coding    |
| MSTRG. 27480. 10 | 1. 1371    | coding    |
| MSTRG. 27480. 12 | 1. 08039   | coding    |
| MSTRG. 27463. 1  | -1. 55626  | noncoding |
| MSTRG. 27466. 2  | 0. 930946  | coding    |
| MSTRG. 27466. 3  | 0. 723772  | coding    |
| MSTRG. 27466. 4  | 0. 768857  | coding    |
| MSTRG. 27467. 2  | 2. 1078    | coding    |
| MSTRG. 27469. 3  | 1. 34644   | coding    |
| MSTRG. 27471. 2  | -0. 059013 | noncoding |
| MSTRG. 27471. 6  | 0. 275116  | coding    |
| MSTRG. 27473. 1  | -1. 8548   | noncoding |
| MSTRG. 27471. 7  | -1. 75761  | noncoding |
| MSTRG. 27471. 8  | -0. 035358 | noncoding |
| MSTRG. 27486. 2  | 1. 13748   | coding    |
| MSTRG. 27486. 3  | 1. 32537   | coding    |
| MSTRG. 27487. 2  | 0. 782104  | coding    |
| MSTRG. 27489. 4  | 0. 673805  | coding    |
| MSTRG. 27489. 5  | 0. 418541  | coding    |
| MSTRG. 27489. 6  | -1. 88402  | noncoding |
| MSTRG. 27489. 7  | 0. 583698  | coding    |
| MSTRG. 27483. 1  | 1. 78635   | coding    |
| MSTRG. 27507. 2  | 1. 67133   | coding    |
| MSTRG. 27507. 3  | 0. 533305  | coding    |
| MSTRG. 27507. 4  | -0. 20228  | noncoding |
| MSTRG. 27507. 5  | 0. 574916  | coding    |
| MSTRG. 27507. 7  | 1. 56473   | coding    |
| MSTRG. 27507. 8  | 1. 5324    | coding    |
| MSTRG. 27508. 1  | -0. 739213 | noncoding |
| MSTRG. 27510. 1  | 0. 922304  | coding    |

|                  |            |           |
|------------------|------------|-----------|
| MSTRG. 27512. 12 | -0. 283604 | noncoding |
| MSTRG. 27510. 3  | 2. 41582   | coding    |
| MSTRG. 27510. 4  | 1. 81861   | coding    |
| MSTRG. 27510. 5  | 1. 8931    | coding    |
| MSTRG. 27510. 6  | -0. 002907 | noncoding |
| MSTRG. 27514. 1  | 2. 99123   | coding    |
| MSTRG. 27514. 2  | 2. 86342   | coding    |
| MSTRG. 27515. 1  | -0. 632182 | noncoding |
| MSTRG. 27521. 1  | 2. 38372   | coding    |
| MSTRG. 27521. 2  | 2. 36008   | coding    |
| MSTRG. 27521. 3  | 2. 45352   | coding    |
| MSTRG. 27524. 2  | 1. 65318   | coding    |
| MSTRG. 27526. 1  | 1. 60811   | coding    |
| MSTRG. 27526. 4  | 1. 33054   | coding    |
| MSTRG. 27497. 1  | 1. 09384   | coding    |
| MSTRG. 27499. 2  | 0. 530123  | coding    |
| MSTRG. 27499. 4  | 0. 423128  | coding    |
| MSTRG. 27505. 1  | 1. 00581   | coding    |
| MSTRG. 27505. 5  | 1. 18015   | coding    |
| MSTRG. 27502. 1  | 1. 66739   | coding    |
| MSTRG. 27533. 4  | 2. 10013   | coding    |
| MSTRG. 27540. 1  | 0. 102911  | coding    |
| MSTRG. 27572. 2  | -0. 222487 | noncoding |
| MSTRG. 27573. 4  | -0. 946527 | noncoding |
| MSTRG. 27573. 3  | -0. 476475 | noncoding |
| MSTRG. 27573. 2  | -0. 549444 | noncoding |
| MSTRG. 27580. 6  | -0. 786887 | noncoding |
| MSTRG. 27580. 7  | -0. 31548  | noncoding |
| MSTRG. 27580. 8  | -0. 469605 | noncoding |
| MSTRG. 27580. 5  | -0. 149687 | noncoding |
| MSTRG. 27580. 9  | 0. 751052  | coding    |
| MSTRG. 27581. 3  | 0. 679669  | coding    |
| MSTRG. 27581. 6  | 0. 592363  | coding    |
| MSTRG. 27581. 5  | 0. 415904  | coding    |
| MSTRG. 27584. 1  | 1. 27758   | coding    |
| MSTRG. 27584. 10 | 1. 38997   | coding    |
| MSTRG. 27584. 11 | 1. 41258   | coding    |
| MSTRG. 27584. 9  | 1. 39897   | coding    |
| MSTRG. 27584. 12 | 1. 90781   | coding    |
| MSTRG. 27584. 13 | 1. 49123   | coding    |
| MSTRG. 27584. 14 | 1. 42793   | coding    |
| MSTRG. 27584. 15 | 1. 40194   | coding    |
| MSTRG. 27587. 3  | -0. 862759 | noncoding |
| MSTRG. 27587. 2  | 0. 686092  | coding    |
| MSTRG. 27588. 4  | 1. 40023   | coding    |
| MSTRG. 27589. 2  | 1. 71047   | coding    |
| MSTRG. 27589. 4  | 2. 44859   | coding    |
| MSTRG. 27590. 5  | 1. 77642   | coding    |
| MSTRG. 27541. 1  | 0. 133224  | coding    |
| MSTRG. 27541. 2  | -0. 781254 | noncoding |
| MSTRG. 27544. 2  | 0. 961347  | coding    |
| MSTRG. 27544. 3  | 0. 353009  | coding    |
| MSTRG. 27547. 1  | 2. 46871   | coding    |
| MSTRG. 27548. 2  | 1. 70543   | coding    |

|                  |           |           |
|------------------|-----------|-----------|
| MSTRG. 27550. 1  | -1.65053  | noncoding |
| MSTRG. 27554. 1  | -1.03203  | noncoding |
| MSTRG. 27555. 1  | -0.126578 | noncoding |
| MSTRG. 27555. 2  | -1.56512  | noncoding |
| MSTRG. 27555. 3  | -1.61885  | noncoding |
| MSTRG. 27556. 1  | -0.043328 | noncoding |
| MSTRG. 27557. 1  | 2.41437   | coding    |
| MSTRG. 27558. 2  | 1.87813   | coding    |
| MSTRG. 27559. 4  | -0.193779 | noncoding |
| MSTRG. 27559. 5  | -0.160642 | noncoding |
| MSTRG. 27560. 1  | 0.807663  | coding    |
| MSTRG. 27563. 1  | -0.042484 | noncoding |
| MSTRG. 27563. 10 | 1.18282   | coding    |
| MSTRG. 27563. 9  | 0.191554  | coding    |
| MSTRG. 27563. 6  | 1.23069   | coding    |
| MSTRG. 27563. 7  | 0.908817  | coding    |
| MSTRG. 27563. 8  | 0.891099  | coding    |
| MSTRG. 27563. 11 | 0.731088  | coding    |
| MSTRG. 27563. 12 | 1.22579   | coding    |
| MSTRG. 27563. 13 | 0.755581  | coding    |
| MSTRG. 27563. 14 | -1.89791  | noncoding |
| MSTRG. 27563. 15 | 0.909132  | coding    |
| MSTRG. 27565. 1  | -0.301183 | noncoding |
| MSTRG. 27563. 16 | 0.917784  | coding    |
| MSTRG. 27563. 17 | 0.591027  | coding    |
| MSTRG. 27567. 5  | 3.04194   | coding    |
| MSTRG. 27567. 6  | 3.02028   | coding    |
| MSTRG. 27569. 2  | 2.62062   | coding    |
| MSTRG. 27596. 1  | 2.53527   | coding    |
| MSTRG. 27596. 3  | 2.28825   | coding    |
| MSTRG. 27596. 4  | 2.2823    | coding    |
| MSTRG. 27597. 2  | 0.749158  | coding    |
| MSTRG. 27617. 2  | 1.10768   | coding    |
| MSTRG. 27617. 3  | 0.593819  | coding    |
| MSTRG. 27617. 4  | 0.921631  | coding    |
| MSTRG. 27620. 8  | 1.76388   | coding    |
| MSTRG. 27620. 2  | 2.2133    | coding    |
| MSTRG. 27620. 3  | 2.14488   | coding    |
| MSTRG. 27620. 4  | 2.1307    | coding    |
| MSTRG. 27620. 5  | 2.3103    | coding    |
| MSTRG. 27620. 6  | 2.21807   | coding    |
| MSTRG. 27620. 7  | 2.21833   | coding    |
| MSTRG. 27620. 9  | 2.31386   | coding    |
| MSTRG. 27620. 10 | 2.02335   | coding    |
| MSTRG. 27620. 11 | 2.08365   | coding    |
| MSTRG. 27620. 12 | -0.257397 | noncoding |
| MSTRG. 27622. 2  | 2.39525   | coding    |
| MSTRG. 27624. 2  | -1.47579  | noncoding |
| MSTRG. 27624. 3  | -0.153935 | noncoding |
| MSTRG. 27598. 2  | 1.30121   | coding    |
| MSTRG. 27598. 3  | 1.08145   | coding    |
| MSTRG. 27601. 1  | -2.015    | noncoding |
| MSTRG. 27602. 1  | -1.22304  | noncoding |
| MSTRG. 27605. 1  | -1.45654  | noncoding |

|                  |            |           |
|------------------|------------|-----------|
| MSTRG. 27605. 5  | -0. 517262 | noncoding |
| MSTRG. 27605. 2  | -0. 172522 | noncoding |
| MSTRG. 27605. 4  | -0. 120894 | noncoding |
| MSTRG. 27606. 1  | -1. 15427  | noncoding |
| MSTRG. 27599. 2  | 0. 894379  | coding    |
| MSTRG. 27630. 1  | -0. 919525 | noncoding |
| MSTRG. 27633. 1  | -0. 011094 | noncoding |
| MSTRG. 27626. 1  | 1. 75467   | coding    |
| MSTRG. 27626. 2  | -1. 786    | noncoding |
| MSTRG. 27626. 3  | -1. 48303  | noncoding |
| MSTRG. 27627. 1  | -0. 129229 | noncoding |
| MSTRG. 27628. 1  | -0. 315256 | noncoding |
| MSTRG. 27651. 1  | 2. 66834   | coding    |
| MSTRG. 27651. 2  | 2. 49066   | coding    |
| MSTRG. 27651. 3  | 0. 375841  | coding    |
| MSTRG. 27655. 1  | 0. 383423  | coding    |
| MSTRG. 27655. 2  | 0. 074694  | coding    |
| MSTRG. 27666. 2  | -0. 165924 | noncoding |
| MSTRG. 27667. 1  | -0. 54288  | noncoding |
| MSTRG. 27668. 6  | 0. 153561  | coding    |
| MSTRG. 27668. 7  | 0. 834434  | coding    |
| MSTRG. 27668. 8  | 1. 17491   | coding    |
| MSTRG. 27668. 9  | 0. 441726  | coding    |
| MSTRG. 27668. 10 | -0. 854435 | noncoding |
| MSTRG. 27669. 5  | 0. 218985  | coding    |
| MSTRG. 27669. 6  | 0. 54045   | coding    |
| MSTRG. 27669. 7  | -0. 458799 | noncoding |
| MSTRG. 27669. 8  | 0. 105302  | coding    |
| MSTRG. 27659. 1  | -0. 754743 | noncoding |
| MSTRG. 27673. 1  | -0. 542597 | noncoding |
| MSTRG. 27676. 3  | 1. 29309   | coding    |
| MSTRG. 27676. 4  | 1. 1725    | coding    |
| MSTRG. 27676. 6  | 1. 24049   | coding    |
| MSTRG. 27676. 7  | 1. 22087   | coding    |
| MSTRG. 27676. 8  | 1. 14795   | coding    |
| MSTRG. 27676. 10 | 0. 79969   | coding    |
| MSTRG. 27680. 1  | 1. 69094   | coding    |
| MSTRG. 27680. 3  | 1. 63511   | coding    |
| MSTRG. 27680. 5  | 0. 708845  | coding    |
| MSTRG. 27680. 4  | 1. 75002   | coding    |
| MSTRG. 27684. 4  | 0. 576136  | coding    |
| MSTRG. 27684. 3  | 0. 651423  | coding    |
| MSTRG. 27684. 2  | 0. 866713  | coding    |
| MSTRG. 27689. 1  | -2. 22786  | noncoding |
| MSTRG. 27690. 2  | -0. 441844 | noncoding |
| MSTRG. 27695. 1  | 0. 702479  | coding    |
| MSTRG. 27695. 3  | 0. 569195  | coding    |
| MSTRG. 27704. 1  | -0. 259074 | noncoding |
| MSTRG. 27706. 1  | -0. 555443 | noncoding |
| MSTRG. 27707. 2  | -0. 019643 | noncoding |
| MSTRG. 27707. 1  | 0. 288921  | coding    |
| MSTRG. 27707. 4  | 1. 31041   | coding    |
| MSTRG. 27708. 2  | -0. 427726 | noncoding |
| MSTRG. 27708. 3  | -0. 063952 | noncoding |

|                 |            |           |
|-----------------|------------|-----------|
| MSTRG. 27717. 5 | 1. 38177   | coding    |
| MSTRG. 27717. 1 | 1. 47253   | coding    |
| MSTRG. 27717. 2 | 1. 43711   | coding    |
| MSTRG. 27720. 1 | -0. 898305 | noncoding |
| MSTRG. 27722. 1 | -0. 281938 | noncoding |
| MSTRG. 27718. 2 | 1. 18661   | coding    |
| MSTRG. 27719. 1 | -1. 69695  | noncoding |
| MSTRG. 27724. 4 | 1. 833     | coding    |
| MSTRG. 27724. 5 | 1. 88614   | coding    |
| MSTRG. 27730. 2 | 0. 094911  | coding    |
| MSTRG. 27731. 3 | 1. 19256   | coding    |
| MSTRG. 27732. 2 | 1. 10635   | coding    |
| MSTRG. 27725. 1 | -1. 38992  | noncoding |
| MSTRG. 27737. 2 | 1. 87294   | coding    |
| MSTRG. 27738. 1 | -0. 976702 | noncoding |
| MSTRG. 27747. 1 | 0. 939877  | coding    |
| MSTRG. 27747. 2 | 2. 11694   | coding    |
| MSTRG. 27747. 3 | 2. 13619   | coding    |
| MSTRG. 27747. 4 | 2. 06839   | coding    |
| MSTRG. 27748. 1 | -0. 120821 | noncoding |
| MSTRG. 27748. 2 | -0. 224439 | noncoding |
| MSTRG. 27751. 1 | -1. 72049  | noncoding |
| MSTRG. 27747. 5 | 1. 63602   | coding    |
| MSTRG. 27752. 1 | -1. 25738  | noncoding |
| MSTRG. 27753. 1 | -2. 16886  | noncoding |
| MSTRG. 27747. 6 | 1. 86754   | coding    |
| MSTRG. 27747. 8 | 1. 84743   | coding    |
| MSTRG. 27754. 1 | 0. 015603  | coding    |
| MSTRG. 27744. 2 | 1. 29497   | coding    |
| MSTRG. 27745. 1 | 0. 115168  | coding    |
| MSTRG. 27745. 3 | 0. 437324  | coding    |
| MSTRG. 27769. 1 | -0. 865078 | noncoding |
| MSTRG. 27772. 3 | 1. 01631   | coding    |
| MSTRG. 27772. 4 | 1. 37706   | coding    |
| MSTRG. 27772. 6 | 1. 47204   | coding    |
| MSTRG. 27778. 2 | 0. 846587  | coding    |
| MSTRG. 27781. 2 | 2. 65543   | coding    |
| MSTRG. 27755. 1 | 2. 2869    | coding    |
| MSTRG. 27757. 1 | 1. 14897   | coding    |
| MSTRG. 27782. 3 | 0. 554105  | coding    |
| MSTRG. 27783. 1 | -0. 918253 | noncoding |
| MSTRG. 27784. 1 | 1. 48166   | coding    |
| MSTRG. 27784. 3 | 1. 31848   | coding    |
| MSTRG. 27784. 2 | 1. 20189   | coding    |
| MSTRG. 27786. 1 | 1. 59044   | coding    |
| MSTRG. 27793. 1 | -1. 45795  | noncoding |
| MSTRG. 27794. 1 | -1. 1378   | noncoding |
| MSTRG. 27795. 1 | 0. 087104  | coding    |
| MSTRG. 27796. 4 | 2. 65663   | coding    |
| MSTRG. 27798. 3 | 0. 127619  | coding    |
| MSTRG. 27800. 1 | -0. 179543 | noncoding |
| MSTRG. 27802. 2 | 0. 198275  | coding    |
| MSTRG. 27802. 3 | 0. 259248  | coding    |
| MSTRG. 27802. 4 | -0. 100093 | noncoding |

|                  |            |           |
|------------------|------------|-----------|
| MSTRG. 27802. 5  | 0. 128964  | coding    |
| MSTRG. 27802. 6  | 0. 56101   | coding    |
| MSTRG. 27804. 2  | -1. 52576  | noncoding |
| MSTRG. 27804. 3  | -1. 10638  | noncoding |
| MSTRG. 27801. 1  | -0. 646163 | noncoding |
| MSTRG. 27801. 2  | -1. 13001  | noncoding |
| MSTRG. 27807. 2  | 1. 75849   | coding    |
| MSTRG. 27808. 4  | 0. 382761  | coding    |
| MSTRG. 27810. 2  | -2. 32839  | noncoding |
| MSTRG. 27814. 1  | 1. 05067   | coding    |
| MSTRG. 27814. 4  | 0. 442311  | coding    |
| MSTRG. 27814. 5  | 0. 834409  | coding    |
| MSTRG. 27814. 12 | 0. 431017  | coding    |
| MSTRG. 27814. 14 | 0. 68201   | coding    |
| MSTRG. 27818. 1  | -1. 08635  | noncoding |
| MSTRG. 27814. 15 | 0. 468137  | coding    |
| MSTRG. 27814. 16 | 0. 427493  | coding    |
| MSTRG. 27814. 17 | 0. 381546  | coding    |
| MSTRG. 27838. 3  | 0. 660646  | coding    |
| MSTRG. 27838. 2  | 0. 722517  | coding    |
| MSTRG. 27838. 4  | 0. 671786  | coding    |
| MSTRG. 27839. 1  | -1. 50909  | noncoding |
| MSTRG. 27840. 1  | 0. 968809  | coding    |
| MSTRG. 27842. 1  | -1. 85586  | noncoding |
| MSTRG. 27842. 2  | -1. 99653  | noncoding |
| MSTRG. 27846. 1  | 0. 438858  | coding    |
| MSTRG. 27846. 2  | 0. 248501  | coding    |
| MSTRG. 27846. 3  | 0. 144019  | coding    |
| MSTRG. 27846. 4  | 2. 17436   | coding    |
| MSTRG. 27846. 5  | 1. 3326    | coding    |
| MSTRG. 27846. 7  | 2. 59412   | coding    |
| MSTRG. 27846. 9  | 1. 85161   | coding    |
| MSTRG. 27846. 8  | 2. 12677   | coding    |
| MSTRG. 27846. 11 | 1. 53812   | coding    |
| MSTRG. 27846. 12 | 1. 71219   | coding    |
| MSTRG. 27847. 1  | 0. 578057  | coding    |
| MSTRG. 27848. 1  | -1. 13575  | noncoding |
| MSTRG. 27846. 13 | 1. 40011   | coding    |
| MSTRG. 27846. 15 | 1. 14082   | coding    |
| MSTRG. 27844. 2  | -0. 389136 | noncoding |
| MSTRG. 27884. 3  | 2. 81836   | coding    |
| MSTRG. 27884. 6  | 2. 59608   | coding    |
| MSTRG. 27885. 1  | 0. 265708  | coding    |
| MSTRG. 27884. 11 | 2. 8514    | coding    |
| MSTRG. 27884. 9  | 2. 79048   | coding    |
| MSTRG. 27884. 8  | 2. 77733   | coding    |
| MSTRG. 27884. 12 | 2. 80599   | coding    |
| MSTRG. 27884. 14 | 2. 79264   | coding    |
| MSTRG. 27884. 15 | 2. 65194   | coding    |
| MSTRG. 27884. 16 | 2. 71778   | coding    |
| MSTRG. 27884. 17 | 2. 70795   | coding    |
| MSTRG. 27884. 18 | 2. 62313   | coding    |
| MSTRG. 27884. 19 | 2. 26726   | coding    |
| MSTRG. 27884. 20 | 1. 44214   | coding    |



|                 |            |           |
|-----------------|------------|-----------|
| MSTRG. 27854. 1 | -2. 5436   | noncoding |
| MSTRG. 27852. 1 | 0. 656557  | coding    |
| MSTRG. 27862. 1 | -1. 55401  | noncoding |
| MSTRG. 27863. 2 | 2. 37225   | coding    |
| MSTRG. 27864. 1 | -0. 898153 | noncoding |
| MSTRG. 27865. 1 | -0. 716354 | noncoding |
| MSTRG. 27870. 1 | 2. 01514   | coding    |
| MSTRG. 27870. 3 | 2. 08793   | coding    |
| MSTRG. 27870. 4 | 1. 95106   | coding    |
| MSTRG. 27870. 5 | 0. 392181  | coding    |
| MSTRG. 27875. 2 | -1. 35326  | noncoding |
| MSTRG. 27876. 1 | 1. 98316   | coding    |
| MSTRG. 27878. 5 | 1. 71478   | coding    |
| MSTRG. 27880. 3 | 1. 25548   | coding    |
| MSTRG. 27882. 2 | 0. 110184  | coding    |
| MSTRG. 27882. 4 | 0. 06306   | coding    |
| MSTRG. 27882. 3 | 0. 4513    | coding    |
| MSTRG. 27893. 3 | 1. 29614   | coding    |
| MSTRG. 27901. 7 | 1. 9399    | coding    |
| MSTRG. 27901. 8 | 1. 8896    | coding    |
| MSTRG. 27904. 1 | 0. 052866  | coding    |
| MSTRG. 27905. 5 | 0. 73508   | coding    |
| MSTRG. 27908. 4 | 0. 481182  | coding    |
| MSTRG. 27908. 5 | 0. 593144  | coding    |
| MSTRG. 27909. 1 | 2. 10555   | coding    |
| MSTRG. 27909. 4 | 1. 51125   | coding    |
| MSTRG. 27909. 3 | 2. 04448   | coding    |
| MSTRG. 27909. 5 | 1. 52271   | coding    |
| MSTRG. 27910. 1 | -0. 487923 | noncoding |
| MSTRG. 27896. 1 | 0. 760173  | coding    |
| MSTRG. 27896. 2 | 0. 764526  | coding    |
| MSTRG. 27897. 1 | 0. 16606   | coding    |
| MSTRG. 27897. 2 | 0. 535591  | coding    |
| MSTRG. 27897. 5 | 0. 948142  | coding    |
| MSTRG. 27900. 2 | 0. 991765  | coding    |
| MSTRG. 27922. 2 | -0. 439114 | noncoding |
| MSTRG. 27913. 2 | 0. 547636  | coding    |
| MSTRG. 27925. 1 | 0. 222461  | coding    |
| MSTRG. 27925. 3 | 0. 192832  | coding    |
| MSTRG. 27928. 1 | 0. 279927  | coding    |
| MSTRG. 27934. 2 | 1. 71598   | coding    |
| MSTRG. 27935. 1 | 0. 523167  | coding    |
| MSTRG. 27936. 1 | -0. 995707 | noncoding |
| MSTRG. 27941. 3 | 1. 53865   | coding    |
| MSTRG. 27942. 1 | -1. 97566  | noncoding |
| MSTRG. 27942. 4 | -2. 27157  | noncoding |
| MSTRG. 27942. 3 | -2. 22625  | noncoding |
| MSTRG. 27942. 2 | -1. 64184  | noncoding |
| MSTRG. 27943. 2 | -0. 86146  | noncoding |
| MSTRG. 27943. 1 | -0. 900812 | noncoding |
| MSTRG. 27943. 3 | -0. 811113 | noncoding |
| MSTRG. 27945. 3 | 1. 08263   | coding    |
| MSTRG. 27945. 5 | 0. 958321  | coding    |
| MSTRG. 27940. 2 | 2. 01589   | coding    |

|                  |            |           |
|------------------|------------|-----------|
| MSTRG. 27949. 1  | 1. 44235   | coding    |
| MSTRG. 27949. 2  | 1. 12713   | coding    |
| MSTRG. 27950. 3  | 1. 61036   | coding    |
| MSTRG. 27950. 4  | 1. 50899   | coding    |
| MSTRG. 27951. 1  | -1. 09551  | noncoding |
| MSTRG. 27950. 6  | 1. 13968   | coding    |
| MSTRG. 27952. 1  | 0. 814083  | coding    |
| MSTRG. 27953. 1  | 0. 005609  | coding    |
| MSTRG. 27955. 1  | -1. 1147   | noncoding |
| MSTRG. 27954. 5  | 0. 222101  | coding    |
| MSTRG. 27956. 1  | 1. 96218   | coding    |
| MSTRG. 27956. 5  | 1. 96102   | coding    |
| MSTRG. 27957. 4  | 0. 647376  | coding    |
| MSTRG. 27957. 3  | 0. 943096  | coding    |
| MSTRG. 27957. 5  | 1. 45412   | coding    |
| MSTRG. 27957. 6  | 1. 69576   | coding    |
| MSTRG. 27957. 7  | 1. 47519   | coding    |
| MSTRG. 27957. 8  | 1. 85983   | coding    |
| MSTRG. 27957. 9  | 1. 61017   | coding    |
| MSTRG. 27957. 10 | 1. 50171   | coding    |
| MSTRG. 27959. 1  | 0. 741593  | coding    |
| MSTRG. 27960. 1  | 0. 273572  | coding    |
| MSTRG. 27960. 2  | -1. 37981  | noncoding |
| MSTRG. 27961. 1  | -0. 315452 | noncoding |
| MSTRG. 27963. 2  | 2. 68637   | coding    |
| MSTRG. 27967. 4  | 1. 20004   | coding    |
| MSTRG. 27967. 5  | 1. 10983   | coding    |
| MSTRG. 27967. 6  | 1. 36183   | coding    |
| MSTRG. 27967. 7  | 0. 676825  | coding    |
| MSTRG. 27968. 3  | 1. 33425   | coding    |
| MSTRG. 27968. 4  | 0. 053523  | coding    |
| MSTRG. 27964. 2  | 1. 55083   | coding    |
| MSTRG. 27969. 3  | 1. 09833   | coding    |
| MSTRG. 27969. 4  | 1. 06634   | coding    |
| MSTRG. 27970. 2  | 0. 749625  | coding    |
| MSTRG. 27975. 5  | -0. 137342 | noncoding |
| MSTRG. 27975. 4  | -0. 330038 | noncoding |
| MSTRG. 27975. 7  | -0. 003383 | noncoding |
| MSTRG. 27983. 2  | 0. 543986  | coding    |
| MSTRG. 27985. 1  | -1. 11082  | noncoding |
| MSTRG. 27988. 3  | 1. 42034   | coding    |
| MSTRG. 27995. 1  | 1. 20138   | coding    |
| MSTRG. 27995. 3  | 0. 377899  | coding    |
| MSTRG. 27996. 1  | 1. 10972   | coding    |
| MSTRG. 27996. 2  | 1. 19696   | coding    |
| MSTRG. 27997. 1  | 0. 43358   | coding    |
| MSTRG. 28003. 6  | 1. 14089   | coding    |
| MSTRG. 28004. 1  | -2. 27867  | noncoding |
| MSTRG. 28005. 1  | 0. 366806  | coding    |
| MSTRG. 28005. 2  | 0. 463917  | coding    |
| MSTRG. 28003. 7  | 0. 809143  | coding    |
| MSTRG. 28003. 8  | 0. 772162  | coding    |
| MSTRG. 28003. 9  | -0. 281819 | noncoding |
| MSTRG. 28007. 2  | 1. 0904    | coding    |

|               |           |           |
|---------------|-----------|-----------|
| MSTRG.28008.1 | 3.23304   | coding    |
| MSTRG.28008.2 | 3.22317   | coding    |
| MSTRG.28008.3 | 3.08843   | coding    |
| MSTRG.28009.1 | -1.80862  | noncoding |
| MSTRG.28011.1 | -1.77818  | noncoding |
| MSTRG.28012.5 | 2.18067   | coding    |
| MSTRG.28012.4 | 2.21871   | coding    |
| MSTRG.28013.3 | 0.718408  | coding    |
| MSTRG.28018.2 | -1.15681  | noncoding |
| MSTRG.28033.6 | -0.349377 | noncoding |
| MSTRG.28033.8 | -0.117236 | noncoding |
| MSTRG.28033.5 | -0.180035 | noncoding |
| MSTRG.28033.7 | -0.138589 | noncoding |
| MSTRG.28034.2 | 2.098     | coding    |
| MSTRG.28034.4 | 2.10996   | coding    |
| MSTRG.28034.9 | 1.99831   | coding    |
| MSTRG.28034.5 | 1.97566   | coding    |
| MSTRG.28034.6 | 1.98068   | coding    |
| MSTRG.28025.1 | -0.619959 | noncoding |
| MSTRG.28024.4 | 1.45886   | coding    |
| MSTRG.28027.1 | -0.690195 | noncoding |
| MSTRG.28027.2 | -0.824345 | noncoding |
| MSTRG.28040.1 | 1.44443   | coding    |
| MSTRG.28040.2 | 1.13827   | coding    |
| MSTRG.28040.4 | 1.29411   | coding    |
| MSTRG.28045.3 | 1.80804   | coding    |
| MSTRG.28035.2 | 0.244707  | coding    |
| MSTRG.28055.1 | -0.050434 | noncoding |
| MSTRG.28058.1 | 0.207935  | coding    |
| MSTRG.28059.1 | -1.04425  | noncoding |
| MSTRG.28051.1 | 0.498933  | coding    |
| MSTRG.28051.4 | 0.636088  | coding    |
| MSTRG.28051.7 | 0.626609  | coding    |
| MSTRG.28062.1 | -2.39989  | noncoding |
| MSTRG.28064.1 | 0.262548  | coding    |
| MSTRG.28070.1 | 1.88295   | coding    |
| MSTRG.28072.3 | 0.636104  | coding    |
| MSTRG.28076.1 | -1.55399  | noncoding |
| MSTRG.28075.1 | 0.207575  | coding    |
| MSTRG.28081.1 | 1.63632   | coding    |
| MSTRG.28085.6 | 1.05798   | coding    |
| MSTRG.28091.4 | -0.01225  | noncoding |
| MSTRG.28091.2 | 1.41431   | coding    |
| MSTRG.28093.2 | 2.40681   | coding    |
| MSTRG.28095.3 | 0.296751  | coding    |
| MSTRG.28095.2 | 0.923191  | coding    |
| MSTRG.28097.2 | -1.20483  | noncoding |
| MSTRG.28098.2 | 0.361834  | coding    |
| MSTRG.28098.1 | 0.529951  | coding    |
| MSTRG.28098.3 | -0.413933 | noncoding |
| MSTRG.28099.3 | 3.3807    | coding    |
| MSTRG.28100.1 | 1.61543   | coding    |
| MSTRG.28100.5 | 1.63458   | coding    |
| MSTRG.28100.6 | 1.49679   | coding    |

|                |           |           |
|----------------|-----------|-----------|
| MSTRG. 28100.7 | 1.61021   | coding    |
| MSTRG. 28100.8 | 1.59423   | coding    |
| MSTRG. 28105.5 | 2.28868   | coding    |
| MSTRG. 28105.6 | 2.39823   | coding    |
| MSTRG. 28107.1 | 3.00136   | coding    |
| MSTRG. 28109.3 | -0.784719 | noncoding |
| MSTRG. 28109.4 | -0.780949 | noncoding |
| MSTRG. 28109.2 | -1.17116  | noncoding |
| MSTRG. 28109.5 | -0.834655 | noncoding |
| MSTRG. 28121.1 | 0.436036  | coding    |
| MSTRG. 28122.1 | -2.25695  | noncoding |
| MSTRG. 28115.4 | -0.584265 | noncoding |
| MSTRG. 28114.2 | 2.1695    | coding    |
| MSTRG. 28127.1 | -1.82148  | noncoding |
| MSTRG. 28132.2 | 0.578841  | coding    |
| MSTRG. 28137.1 | 0.012784  | coding    |
| MSTRG. 28131.3 | -0.330433 | noncoding |
| MSTRG. 28141.1 | -2.45974  | noncoding |
| MSTRG. 28142.2 | 1.74231   | coding    |
| MSTRG. 28147.1 | 1.45035   | coding    |
| MSTRG. 28154.1 | -2.22751  | noncoding |
| MSTRG. 28160.1 | 1.87835   | coding    |
| MSTRG. 28160.5 | 0.813998  | coding    |
| MSTRG. 28161.1 | -0.793237 | noncoding |
| MSTRG. 28162.1 | 0.165591  | coding    |
| MSTRG. 28168.3 | 1.34496   | coding    |
| MSTRG. 28174.1 | 0.754236  | coding    |
| MSTRG. 28174.2 | 0.530667  | coding    |
| MSTRG. 28175.1 | -2.1466   | noncoding |
| MSTRG. 28177.1 | -1.29345  | noncoding |
| MSTRG. 28178.1 | 0.471323  | coding    |
| MSTRG. 28171.1 | -2.56364  | noncoding |
| MSTRG. 28186.1 | -0.256094 | noncoding |
| MSTRG. 28191.1 | 0.656792  | coding    |
| MSTRG. 28191.8 | -0.022088 | noncoding |
| MSTRG. 28192.3 | -0.64849  | noncoding |
| MSTRG. 28204.2 | -0.347663 | noncoding |
| MSTRG. 28207.1 | -2.13507  | noncoding |
| MSTRG. 28207.2 | -0.855072 | noncoding |
| MSTRG. 28207.3 | -2.22562  | noncoding |
| MSTRG. 28211.2 | 0.739661  | coding    |
| MSTRG. 28213.2 | 0.351337  | coding    |
| MSTRG. 28194.2 | 0.322872  | coding    |
| MSTRG. 28196.2 | -0.711946 | noncoding |
| MSTRG. 28197.1 | -1.21878  | noncoding |
| MSTRG. 28214.1 | -1.58433  | noncoding |
| MSTRG. 28220.1 | 1.06658   | coding    |
| MSTRG. 28220.2 | 0.888525  | coding    |
| MSTRG. 28223.2 | 0.428785  | coding    |
| MSTRG. 28224.2 | 1.68559   | coding    |
| MSTRG. 28217.1 | -1.41602  | noncoding |
| MSTRG. 28217.2 | -1.40582  | noncoding |
| MSTRG. 28225.1 | 0.807987  | coding    |
| MSTRG. 28227.3 | 1.85844   | coding    |

|                  |            |           |
|------------------|------------|-----------|
| MSTRG. 28249. 2  | 2. 08183   | coding    |
| MSTRG. 28249. 3  | 1. 92632   | coding    |
| MSTRG. 28249. 4  | 2. 06553   | coding    |
| MSTRG. 28249. 5  | 1. 86239   | coding    |
| MSTRG. 28249. 7  | 1. 10843   | coding    |
| MSTRG. 28249. 8  | 1. 06173   | coding    |
| MSTRG. 28249. 6  | 1. 96842   | coding    |
| MSTRG. 28249. 9  | 1. 87522   | coding    |
| MSTRG. 28249. 11 | 1. 71578   | coding    |
| MSTRG. 28250. 1  | 0. 203261  | coding    |
| MSTRG. 28251. 1  | 1. 36242   | coding    |
| MSTRG. 28251. 2  | 1. 30239   | coding    |
| MSTRG. 28251. 5  | 1. 17843   | coding    |
| MSTRG. 28251. 6  | 0. 264312  | coding    |
| MSTRG. 28249. 13 | 1. 81821   | coding    |
| MSTRG. 28232. 2  | 2. 00011   | coding    |
| MSTRG. 28233. 2  | -0. 378682 | noncoding |
| MSTRG. 28233. 3  | 0. 116005  | coding    |
| MSTRG. 28233. 4  | -0. 407419 | noncoding |
| MSTRG. 28236. 2  | 2. 58246   | coding    |
| MSTRG. 28236. 4  | 2. 5863    | coding    |
| MSTRG. 28229. 1  | 1. 43678   | coding    |
| MSTRG. 28239. 1  | 0. 462098  | coding    |
| MSTRG. 28244. 2  | 2. 13797   | coding    |
| MSTRG. 28244. 3  | -0. 639821 | noncoding |
| MSTRG. 28244. 6  | 1. 96193   | coding    |
| MSTRG. 28246. 2  | -0. 157722 | noncoding |
| MSTRG. 28247. 1  | 0. 043286  | coding    |
| MSTRG. 28247. 3  | 0. 551367  | coding    |
| MSTRG. 28247. 5  | 0. 403099  | coding    |
| MSTRG. 28247. 2  | 0. 055716  | coding    |
| MSTRG. 28241. 1  | -1. 04881  | noncoding |
| MSTRG. 28242. 1  | 1. 02598   | coding    |
| MSTRG. 28242. 3  | 1. 23523   | coding    |
| MSTRG. 28242. 5  | 1. 56031   | coding    |
| MSTRG. 28243. 1  | 1. 28675   | coding    |
| MSTRG. 28255. 2  | 0. 100522  | coding    |
| MSTRG. 28256. 5  | 1. 92929   | coding    |
| MSTRG. 28257. 2  | 1. 99571   | coding    |
| MSTRG. 28257. 3  | 2. 13834   | coding    |
| MSTRG. 28257. 4  | 2. 04441   | coding    |
| MSTRG. 28300. 1  | -0. 72283  | noncoding |
| MSTRG. 28300. 2  | 0. 891756  | coding    |
| MSTRG. 28301. 1  | -1. 39252  | noncoding |
| MSTRG. 28300. 3  | 1. 39003   | coding    |
| MSTRG. 28300. 4  | 0. 757402  | coding    |
| MSTRG. 28300. 5  | 0. 797228  | coding    |
| MSTRG. 28300. 6  | 2. 00916   | coding    |
| MSTRG. 28300. 8  | 0. 648187  | coding    |
| MSTRG. 28300. 9  | 1. 46394   | coding    |
| MSTRG. 28300. 10 | 1. 22307   | coding    |
| MSTRG. 28308. 1  | 1. 30752   | coding    |
| MSTRG. 28308. 6  | 1. 22825   | coding    |
| MSTRG. 28312. 1  | 2. 74438   | coding    |

|                  |            |           |
|------------------|------------|-----------|
| MSTRG. 28312. 3  | 2. 6256    | coding    |
| MSTRG. 28312. 2  | 2. 67867   | coding    |
| MSTRG. 28312. 4  | 2. 72464   | coding    |
| MSTRG. 28315. 1  | -2. 45425  | noncoding |
| MSTRG. 28316. 8  | 1. 34815   | coding    |
| MSTRG. 28319. 1  | 0. 484974  | coding    |
| MSTRG. 28319. 2  | 0. 483331  | coding    |
| MSTRG. 28319. 4  | 0. 780286  | coding    |
| MSTRG. 28319. 6  | 0. 7531    | coding    |
| MSTRG. 28321. 1  | 1. 23445   | coding    |
| MSTRG. 28325. 2  | 0. 806584  | coding    |
| MSTRG. 28325. 5  | 0. 008221  | coding    |
| MSTRG. 28324. 3  | 1. 88735   | coding    |
| MSTRG. 28326. 1  | 2. 92026   | coding    |
| MSTRG. 28328. 2  | -0. 559395 | noncoding |
| MSTRG. 28329. 3  | 1. 498     | coding    |
| MSTRG. 28332. 2  | -1. 1541   | noncoding |
| MSTRG. 28300. 13 | -0. 291654 | noncoding |
| MSTRG. 28266. 4  | 1. 40164   | coding    |
| MSTRG. 28266. 5  | 1. 02049   | coding    |
| MSTRG. 28266. 7  | -0. 754653 | noncoding |
| MSTRG. 28267. 1  | -0. 935831 | noncoding |
| MSTRG. 28267. 2  | -1. 20774  | noncoding |
| MSTRG. 28266. 17 | -1. 24298  | noncoding |
| MSTRG. 28274. 1  | 0. 589311  | coding    |
| MSTRG. 28274. 2  | 0. 224884  | coding    |
| MSTRG. 28270. 1  | 1. 34306   | coding    |
| MSTRG. 28271. 1  | -0. 094467 | noncoding |
| MSTRG. 28281. 2  | 2. 16861   | coding    |
| MSTRG. 28281. 3  | 2. 31194   | coding    |
| MSTRG. 28281. 4  | 2. 50095   | coding    |
| MSTRG. 28281. 5  | 2. 28822   | coding    |
| MSTRG. 28281. 6  | 2. 30065   | coding    |
| MSTRG. 28281. 7  | 2. 67709   | coding    |
| MSTRG. 28281. 8  | 2. 37871   | coding    |
| MSTRG. 28281. 9  | 0. 711373  | coding    |
| MSTRG. 28281. 10 | 1. 71629   | coding    |
| MSTRG. 28294. 2  | 1. 15417   | coding    |
| MSTRG. 28297. 3  | -1. 06021  | noncoding |
| MSTRG. 28335. 1  | 2. 64663   | coding    |
| MSTRG. 28336. 1  | -2. 5709   | noncoding |
| MSTRG. 28335. 2  | 2. 04538   | coding    |
| MSTRG. 28335. 3  | 1. 83867   | coding    |
| MSTRG. 28338. 1  | 1. 55175   | coding    |
| MSTRG. 28339. 3  | 0. 983766  | coding    |
| MSTRG. 28341. 2  | 0. 711037  | coding    |
| MSTRG. 28341. 4  | 1. 54376   | coding    |
| MSTRG. 28342. 3  | 1. 75773   | coding    |
| MSTRG. 28342. 4  | 1. 22899   | coding    |
| MSTRG. 28343. 1  | -1. 58068  | noncoding |
| MSTRG. 28367. 1  | 0. 741761  | coding    |
| MSTRG. 28367. 2  | 0. 578904  | coding    |
| MSTRG. 28368. 2  | 0. 722653  | coding    |
| MSTRG. 28370. 1  | -0. 02295  | noncoding |

|                  |            |           |
|------------------|------------|-----------|
| MSTRG. 28371. 1  | -0. 714809 | noncoding |
| MSTRG. 28372. 1  | -0. 470557 | noncoding |
| MSTRG. 28375. 1  | -1. 15091  | noncoding |
| MSTRG. 28377. 1  | 0. 685724  | coding    |
| MSTRG. 28371. 2  | 0. 4593    | coding    |
| MSTRG. 28371. 3  | 0. 369468  | coding    |
| MSTRG. 28378. 1  | 0. 156667  | coding    |
| MSTRG. 28379. 1  | 1. 77316   | coding    |
| MSTRG. 28380. 1  | 0. 71019   | coding    |
| MSTRG. 28386. 3  | 1. 22074   | coding    |
| MSTRG. 28386. 2  | 1. 07869   | coding    |
| MSTRG. 28388. 1  | 0. 329651  | coding    |
| MSTRG. 28386. 4  | 0. 265108  | coding    |
| MSTRG. 28388. 2  | 0. 619909  | coding    |
| MSTRG. 28389. 1  | 1. 39824   | coding    |
| MSTRG. 28379. 2  | 0. 439392  | coding    |
| MSTRG. 28388. 3  | 1. 21503   | coding    |
| MSTRG. 28371. 4  | 0. 964829  | coding    |
| MSTRG. 28359. 7  | -0. 667977 | noncoding |
| MSTRG. 28359. 6  | 0. 128978  | coding    |
| MSTRG. 28359. 3  | 0. 886139  | coding    |
| MSTRG. 28359. 5  | 1. 09511   | coding    |
| MSTRG. 28359. 8  | 1. 09246   | coding    |
| MSTRG. 28359. 9  | 0. 795715  | coding    |
| MSTRG. 28359. 10 | -0. 305355 | noncoding |
| MSTRG. 28361. 1  | 0. 113146  | coding    |
| MSTRG. 28362. 1  | -0. 160036 | noncoding |
| MSTRG. 28359. 11 | 0. 281504  | coding    |
| MSTRG. 28363. 1  | 0. 384547  | coding    |
| MSTRG. 28363. 2  | 0. 071491  | coding    |
| MSTRG. 28363. 3  | 0. 414748  | coding    |
| MSTRG. 28366. 4  | 0. 753227  | coding    |
| MSTRG. 28366. 5  | 1. 55617   | coding    |
| MSTRG. 28366. 6  | 0. 605839  | coding    |
| MSTRG. 28393. 1  | 1. 89607   | coding    |
| MSTRG. 28393. 3  | 2. 2641    | coding    |
| MSTRG. 28393. 4  | 2. 17045   | coding    |
| MSTRG. 28393. 6  | 2. 04848   | coding    |
| MSTRG. 28393. 2  | 2. 10024   | coding    |
| MSTRG. 28397. 1  | 0. 366986  | coding    |
| MSTRG. 28399. 2  | 0. 606333  | coding    |
| MSTRG. 28400. 1  | 1. 12991   | coding    |
| MSTRG. 28400. 2  | 1. 19577   | coding    |
| MSTRG. 28400. 3  | 1. 01318   | coding    |
| MSTRG. 28401. 1  | -1. 33871  | noncoding |
| MSTRG. 28391. 2  | 0. 576095  | coding    |
| MSTRG. 28403. 1  | -2. 44784  | noncoding |
| MSTRG. 28404. 1  | 0. 193203  | coding    |
| MSTRG. 28409. 2  | -0. 442989 | noncoding |
| MSTRG. 28409. 1  | 0. 01376   | coding    |
| MSTRG. 28409. 3  | -1. 73544  | noncoding |
| MSTRG. 28409. 4  | -1. 27438  | noncoding |
| MSTRG. 28409. 6  | -1. 26845  | noncoding |
| MSTRG. 28409. 5  | -0. 172474 | noncoding |

|                  |            |           |
|------------------|------------|-----------|
| MSTRG. 28409. 7  | -0. 551481 | noncoding |
| MSTRG. 28409. 8  | -0. 666142 | noncoding |
| MSTRG. 28410. 1  | -1. 0356   | noncoding |
| MSTRG. 28409. 9  | 0. 612355  | coding    |
| MSTRG. 28409. 10 | -0. 752928 | noncoding |
| MSTRG. 28411. 1  | -0. 864651 | noncoding |
| MSTRG. 28409. 11 | -1. 04958  | noncoding |
| MSTRG. 28449. 3  | 0. 22928   | coding    |
| MSTRG. 28457. 1  | 1. 19219   | coding    |
| MSTRG. 28457. 2  | 0. 839541  | coding    |
| MSTRG. 28457. 5  | 0. 929246  | coding    |
| MSTRG. 28457. 6  | 1. 68901   | coding    |
| MSTRG. 28459. 1  | -0. 126987 | noncoding |
| MSTRG. 28460. 1  | 0. 731134  | coding    |
| MSTRG. 28463. 1  | -0. 608682 | noncoding |
| MSTRG. 28464. 1  | 0. 894579  | coding    |
| MSTRG. 28466. 1  | -0. 489577 | noncoding |
| MSTRG. 28467. 1  | 0. 337599  | coding    |
| MSTRG. 28470. 1  | -0. 15191  | noncoding |
| MSTRG. 28470. 2  | -0. 189735 | noncoding |
| MSTRG. 28471. 2  | 0. 776591  | coding    |
| MSTRG. 28471. 3  | 0. 392057  | coding    |
| MSTRG. 28474. 1  | 0. 810569  | coding    |
| MSTRG. 28471. 4  | 0. 560369  | coding    |
| MSTRG. 28476. 2  | 1. 46281   | coding    |
| MSTRG. 28430. 1  | -0. 694597 | noncoding |
| MSTRG. 28430. 2  | -0. 180383 | noncoding |
| MSTRG. 28432. 1  | 0. 418116  | coding    |
| MSTRG. 28433. 1  | -2. 27164  | noncoding |
| MSTRG. 28439. 1  | 2. 73521   | coding    |
| MSTRG. 28443. 1  | -2. 00421  | noncoding |
| MSTRG. 28442. 2  | 1. 56474   | coding    |
| MSTRG. 28445. 1  | 1. 88967   | coding    |
| MSTRG. 28480. 2  | -1. 7945   | noncoding |
| MSTRG. 28480. 1  | -1. 14038  | noncoding |
| MSTRG. 28480. 3  | -0. 362157 | noncoding |
| MSTRG. 28481. 3  | 1. 77262   | coding    |
| MSTRG. 28485. 1  | 0. 017737  | coding    |
| MSTRG. 28485. 2  | -0. 036176 | noncoding |
| MSTRG. 28485. 3  | 0. 658048  | coding    |
| MSTRG. 28485. 4  | 0. 249631  | coding    |
| MSTRG. 28485. 5  | 0. 091574  | coding    |
| MSTRG. 28485. 6  | -0. 853682 | noncoding |
| MSTRG. 28487. 2  | 0. 180971  | coding    |
| MSTRG. 28487. 3  | 0. 265774  | coding    |
| MSTRG. 28488. 1  | 2. 25688   | coding    |
| MSTRG. 28488. 2  | 2. 45057   | coding    |
| MSTRG. 28488. 3  | 2. 44553   | coding    |
| MSTRG. 28488. 4  | 2. 54054   | coding    |
| MSTRG. 28488. 5  | 1. 79976   | coding    |
| MSTRG. 28488. 7  | 0. 849517  | coding    |
| MSTRG. 28489. 1  | -0. 036324 | noncoding |
| MSTRG. 28488. 8  | 0. 068278  | coding    |
| MSTRG. 28488. 9  | -0. 146545 | noncoding |



|                  |           |           |
|------------------|-----------|-----------|
| MSTRG. 28488. 10 | -0.065263 | noncoding |
| MSTRG. 28488. 11 | 0.120291  | coding    |
| MSTRG. 28491. 1  | -0.808323 | noncoding |
| MSTRG. 28492. 1  | -2.08403  | noncoding |
| MSTRG. 28495. 1  | -0.799334 | noncoding |
| MSTRG. 28495. 2  | -0.625665 | noncoding |
| MSTRG. 28499. 3  | 1.36477   | coding    |
| MSTRG. 28501. 3  | 0.929667  | coding    |
| MSTRG. 28501. 4  | 0.740237  | coding    |
| MSTRG. 28502. 1  | -2.00946  | noncoding |
| MSTRG. 28505. 3  | 0.717302  | coding    |
| MSTRG. 28509. 4  | -0.006291 | noncoding |
| MSTRG. 28509. 5  | 0.092121  | coding    |
| MSTRG. 28509. 2  | 0.345114  | coding    |
| MSTRG. 28509. 3  | 0.314992  | coding    |
| MSTRG. 28510. 1  | -1.21893  | noncoding |
| MSTRG. 28514. 5  | 1.35019   | coding    |
| MSTRG. 28515. 1  | 0.411557  | coding    |
| MSTRG. 28515. 2  | -0.308341 | noncoding |
| MSTRG. 28515. 3  | 0.013208  | coding    |
| MSTRG. 28517. 1  | -2.10316  | noncoding |
| MSTRG. 28517. 2  | -2.53141  | noncoding |
| MSTRG. 28517. 3  | -1.81651  | noncoding |
| MSTRG. 28517. 4  | -1.68738  | noncoding |
| MSTRG. 28517. 5  | -1.87986  | noncoding |
| MSTRG. 28520. 2  | 0.017247  | coding    |
| MSTRG. 28522. 2  | -0.156749 | noncoding |
| MSTRG. 28522. 3  | 0.07741   | coding    |
| MSTRG. 28522. 4  | 0.028889  | coding    |
| MSTRG. 28522. 6  | 0.125991  | coding    |
| MSTRG. 28522. 8  | -0.038026 | noncoding |
| MSTRG. 28525. 2  | 0.78085   | coding    |
| MSTRG. 28525. 3  | 0.184268  | coding    |
| MSTRG. 28532. 3  | 1.49104   | coding    |
| MSTRG. 28532. 5  | 1.00665   | coding    |
| MSTRG. 28533. 1  | -1.70446  | noncoding |
| MSTRG. 28538. 2  | 3.3725    | coding    |
| MSTRG. 28546. 1  | 1.14997   | coding    |
| MSTRG. 28546. 2  | 0.033621  | coding    |
| MSTRG. 28546. 3  | 0.439492  | coding    |
| MSTRG. 28546. 4  | 0.255257  | coding    |
| MSTRG. 28546. 12 | 0.996395  | coding    |
| MSTRG. 28546. 10 | 0.300945  | coding    |
| MSTRG. 28546. 8  | -0.021813 | noncoding |
| MSTRG. 28539. 2  | 2.34178   | coding    |
| MSTRG. 28539. 3  | 2.37149   | coding    |
| MSTRG. 28539. 5  | 2.28649   | coding    |
| MSTRG. 28539. 6  | 2.2092    | coding    |
| MSTRG. 28539. 7  | 2.2186    | coding    |
| MSTRG. 28539. 8  | 2.35815   | coding    |
| MSTRG. 28550. 3  | -1.26282  | noncoding |
| MSTRG. 28551. 1  | -0.505012 | noncoding |
| MSTRG. 28552. 1  | 0.519425  | coding    |
| MSTRG. 28553. 1  | -0.312759 | noncoding |

|                  |            |           |
|------------------|------------|-----------|
| MSTRG. 28554. 1  | -0. 227541 | noncoding |
| MSTRG. 28555. 2  | -0. 853846 | noncoding |
| MSTRG. 28555. 3  | -1. 32135  | noncoding |
| MSTRG. 28556. 1  | -0. 694516 | noncoding |
| MSTRG. 28557. 1  | -1. 27063  | noncoding |
| MSTRG. 28555. 4  | -1. 83827  | noncoding |
| MSTRG. 28559. 1  | 0. 000024  | coding    |
| MSTRG. 28561. 3  | 1. 3921    | coding    |
| MSTRG. 28563. 1  | 2. 09567   | coding    |
| MSTRG. 28563. 5  | 1. 71021   | coding    |
| MSTRG. 28564. 1  | -0. 054877 | noncoding |
| MSTRG. 28565. 1  | -0. 008579 | noncoding |
| MSTRG. 28566. 1  | -0. 902486 | noncoding |
| MSTRG. 28567. 1  | -0. 529643 | noncoding |
| MSTRG. 28568. 1  | -0. 918451 | noncoding |
| MSTRG. 28571. 2  | -0. 32631  | noncoding |
| MSTRG. 28571. 3  | 0. 066984  | coding    |
| MSTRG. 28572. 1  | -0. 394052 | noncoding |
| MSTRG. 28579. 2  | 1. 96394   | coding    |
| MSTRG. 28586. 1  | 2. 16387   | coding    |
| MSTRG. 28586. 3  | 1. 69143   | coding    |
| MSTRG. 28586. 4  | 1. 83511   | coding    |
| MSTRG. 28586. 5  | 1. 83159   | coding    |
| MSTRG. 28587. 2  | 0. 124616  | coding    |
| MSTRG. 28587. 3  | 0. 298818  | coding    |
| MSTRG. 28588. 1  | 0. 845449  | coding    |
| MSTRG. 28590. 1  | -2. 4499   | noncoding |
| MSTRG. 28588. 2  | 0. 023859  | coding    |
| MSTRG. 28594. 2  | -0. 072399 | noncoding |
| MSTRG. 28581. 2  | 1. 19334   | coding    |
| MSTRG. 28585. 1  | -0. 563715 | noncoding |
| MSTRG. 28595. 1  | -1. 92604  | noncoding |
| MSTRG. 28600. 2  | 0. 705646  | coding    |
| MSTRG. 28600. 3  | 0. 580858  | coding    |
| MSTRG. 28600. 6  | 0. 433519  | coding    |
| MSTRG. 28600. 5  | 1. 42094   | coding    |
| MSTRG. 28600. 4  | 0. 89515   | coding    |
| MSTRG. 28600. 7  | 1. 5654    | coding    |
| MSTRG. 28600. 8  | 0. 626154  | coding    |
| MSTRG. 28600. 9  | 1. 25901   | coding    |
| MSTRG. 28602. 1  | -2. 19471  | noncoding |
| MSTRG. 28603. 1  | 0. 467971  | coding    |
| MSTRG. 28604. 1  | -1. 29882  | noncoding |
| MSTRG. 28605. 1  | -1. 45081  | noncoding |
| MSTRG. 28606. 1  | -0. 439076 | noncoding |
| MSTRG. 28597. 1  | -0. 480008 | noncoding |
| MSTRG. 28613. 7  | -0. 095055 | noncoding |
| MSTRG. 28613. 6  | 0. 469898  | coding    |
| MSTRG. 28613. 8  | 0. 442077  | coding    |
| MSTRG. 28613. 9  | 0. 472281  | coding    |
| MSTRG. 28613. 10 | -0. 799372 | noncoding |
| MSTRG. 28614. 1  | -0. 715604 | noncoding |
| MSTRG. 28609. 1  | -2. 17027  | noncoding |
| MSTRG. 28618. 1  | -2. 16514  | noncoding |

|                 |            |           |
|-----------------|------------|-----------|
| MSTRG. 28620. 4 | 1. 48482   | coding    |
| MSTRG. 28620. 3 | 1. 57977   | coding    |
| MSTRG. 28623. 2 | 0. 133768  | coding    |
| MSTRG. 28625. 1 | 0. 931546  | coding    |
| MSTRG. 28625. 2 | 1. 6584    | coding    |
| MSTRG. 28625. 3 | 0. 707121  | coding    |
| MSTRG. 28625. 4 | 0. 785175  | coding    |
| MSTRG. 28627. 4 | 1. 43801   | coding    |
| MSTRG. 28627. 3 | 1. 41632   | coding    |
| MSTRG. 28627. 5 | 1. 40626   | coding    |
| MSTRG. 28628. 1 | -0. 351058 | noncoding |
| MSTRG. 28631. 2 | -0. 989975 | noncoding |
| MSTRG. 28631. 3 | 0. 840381  | coding    |
| MSTRG. 28633. 1 | -0. 965509 | noncoding |
| MSTRG. 28642. 2 | 1. 1746    | coding    |
| MSTRG. 28642. 8 | 1. 61289   | coding    |
| MSTRG. 28642. 7 | 1. 54367   | coding    |
| MSTRG. 28642. 5 | 1. 36588   | coding    |
| MSTRG. 28642. 6 | 1. 56604   | coding    |
| MSTRG. 28642. 3 | 1. 3551    | coding    |
| MSTRG. 28638. 1 | -2. 21857  | noncoding |
| MSTRG. 28638. 2 | -2. 39798  | noncoding |
| MSTRG. 28644. 1 | 0. 27912   | coding    |
| MSTRG. 28645. 2 | 1. 1891    | coding    |
| MSTRG. 28646. 3 | -1. 37354  | noncoding |
| MSTRG. 28646. 4 | -1. 50407  | noncoding |
| MSTRG. 28646. 5 | -1. 29514  | noncoding |
| MSTRG. 28647. 1 | 0. 355821  | coding    |
| MSTRG. 28648. 1 | -1. 33754  | noncoding |
| MSTRG. 28648. 2 | -1. 70298  | noncoding |
| MSTRG. 28648. 3 | -2. 4854   | noncoding |
| MSTRG. 28650. 1 | -0. 380224 | noncoding |
| MSTRG. 28650. 3 | -1. 6424   | noncoding |
| MSTRG. 28650. 2 | -1. 15501  | noncoding |
| MSTRG. 28652. 1 | -2. 0773   | noncoding |
| MSTRG. 28653. 1 | 3. 86829   | coding    |
| MSTRG. 28654. 1 | 0. 451604  | coding    |
| MSTRG. 28656. 1 | -2. 22299  | noncoding |
| MSTRG. 28657. 3 | 1. 23623   | coding    |
| MSTRG. 28658. 1 | -0. 591125 | noncoding |
| MSTRG. 28662. 4 | 0. 845756  | coding    |
| MSTRG. 28662. 3 | 0. 878672  | coding    |
| MSTRG. 28661. 1 | -1. 07365  | noncoding |
| MSTRG. 28661. 2 | -1. 70861  | noncoding |
| MSTRG. 28663. 1 | 1. 37526   | coding    |
| MSTRG. 28663. 2 | 1. 55473   | coding    |
| MSTRG. 28669. 2 | -0. 644473 | noncoding |
| MSTRG. 28672. 1 | -1. 99714  | noncoding |
| MSTRG. 28672. 2 | -1. 72686  | noncoding |
| MSTRG. 28672. 3 | -1. 5019   | noncoding |
| MSTRG. 28677. 1 | -1. 23802  | noncoding |
| MSTRG. 28677. 2 | -2. 19646  | noncoding |
| MSTRG. 28682. 2 | 2. 51485   | coding    |
| MSTRG. 28688. 2 | 1. 40431   | coding    |

|                 |            |           |
|-----------------|------------|-----------|
| MSTRG. 28693. 1 | -1. 93818  | noncoding |
| MSTRG. 28702. 1 | -2. 10071  | noncoding |
| MSTRG. 28705. 1 | -1. 62617  | noncoding |
| MSTRG. 28707. 1 | -0. 027493 | noncoding |
| MSTRG. 28712. 2 | -1. 14213  | noncoding |
| MSTRG. 28712. 3 | -1. 33081  | noncoding |
| MSTRG. 28714. 1 | -2. 14879  | noncoding |
| MSTRG. 28716. 1 | -0. 744157 | noncoding |
| MSTRG. 28718. 2 | 1. 29537   | coding    |
| MSTRG. 28715. 1 | -2. 28755  | noncoding |
| MSTRG. 28720. 1 | -1. 31137  | noncoding |
| MSTRG. 28731. 1 | -0. 716838 | noncoding |
| MSTRG. 28732. 1 | -1. 75506  | noncoding |
| MSTRG. 28742. 4 | 1. 74987   | coding    |
| MSTRG. 28743. 1 | -0. 850943 | noncoding |
| MSTRG. 28744. 1 | -0. 067001 | noncoding |
| MSTRG. 28745. 1 | 0. 54321   | coding    |
| MSTRG. 28745. 3 | 0. 829852  | coding    |
| MSTRG. 28745. 5 | 0. 520744  | coding    |
| MSTRG. 28746. 1 | 0. 849231  | coding    |
| MSTRG. 28746. 3 | 1. 21242   | coding    |
| MSTRG. 28746. 4 | -0. 037221 | noncoding |
| MSTRG. 28746. 5 | -0. 445064 | noncoding |
| MSTRG. 28737. 2 | 1. 50872   | coding    |
| MSTRG. 28737. 3 | 1. 17053   | coding    |
| MSTRG. 28739. 3 | 1. 16338   | coding    |
| MSTRG. 28739. 4 | 0. 603319  | coding    |
| MSTRG. 28739. 5 | 0. 570612  | coding    |
| MSTRG. 28739. 6 | -0. 330332 | noncoding |
| MSTRG. 28740. 1 | -0. 199068 | noncoding |
| MSTRG. 28755. 1 | -1. 40468  | noncoding |
| MSTRG. 28765. 1 | 1. 77272   | coding    |
| MSTRG. 28770. 1 | 0. 970944  | coding    |
| MSTRG. 28770. 3 | 1. 09488   | coding    |
| MSTRG. 28780. 1 | 2. 51722   | coding    |
| MSTRG. 28780. 3 | 2. 94334   | coding    |
| MSTRG. 28784. 1 | 1. 4177    | coding    |
| MSTRG. 28784. 2 | 1. 29091   | coding    |
| MSTRG. 28783. 1 | 0. 855654  | coding    |
| MSTRG. 28790. 1 | -2. 70992  | noncoding |
| MSTRG. 28790. 2 | -2. 76826  | noncoding |
| MSTRG. 28794. 1 | -2. 12489  | noncoding |
| MSTRG. 28799. 2 | 2. 11927   | coding    |
| MSTRG. 28822. 1 | -0. 741961 | noncoding |
| MSTRG. 28830. 1 | -1. 92036  | noncoding |
| MSTRG. 28839. 1 | 1. 95559   | coding    |
| MSTRG. 28839. 2 | 1. 94742   | coding    |
| MSTRG. 28839. 4 | -0. 076695 | noncoding |
| MSTRG. 28842. 1 | -0. 24677  | noncoding |
| MSTRG. 28844. 6 | 1. 51339   | coding    |
| MSTRG. 28844. 5 | 1. 83284   | coding    |
| MSTRG. 28846. 3 | 2. 15901   | coding    |
| MSTRG. 28853. 2 | 2. 44494   | coding    |
| MSTRG. 28853. 3 | 1. 39256   | coding    |

|                  |            |           |
|------------------|------------|-----------|
| MSTRG. 28853. 5  | 2. 43861   | coding    |
| MSTRG. 28853. 6  | 1. 14902   | coding    |
| MSTRG. 28854. 1  | -2. 88387  | noncoding |
| MSTRG. 28853. 10 | -0. 63052  | noncoding |
| MSTRG. 28853. 9  | 2. 6187    | coding    |
| MSTRG. 28856. 1  | -0. 472958 | noncoding |
| MSTRG. 28857. 6  | 1. 21017   | coding    |
| MSTRG. 28857. 5  | 1. 07386   | coding    |
| MSTRG. 28857. 8  | 1. 5132    | coding    |
| MSTRG. 28857. 7  | 1. 146     | coding    |
| MSTRG. 28858. 2  | 2. 07245   | coding    |
| MSTRG. 28859. 1  | -0. 415299 | noncoding |
| MSTRG. 28862. 2  | 1. 74799   | coding    |
| MSTRG. 28862. 3  | 1. 42922   | coding    |
| MSTRG. 28862. 4  | 1. 50014   | coding    |
| MSTRG. 28862. 5  | 1. 75024   | coding    |
| MSTRG. 28862. 6  | 1. 72415   | coding    |
| MSTRG. 28862. 7  | 0. 336545  | coding    |
| MSTRG. 28860. 2  | -0. 075094 | noncoding |
| MSTRG. 28866. 2  | 2. 50456   | coding    |
| MSTRG. 28866. 3  | -0. 345477 | noncoding |
| MSTRG. 28869. 1  | -1. 99512  | noncoding |
| MSTRG. 28879. 1  | 0. 480005  | coding    |
| MSTRG. 28879. 4  | -0. 544387 | noncoding |
| MSTRG. 28879. 3  | -0. 415113 | noncoding |
| MSTRG. 28879. 5  | -0. 253343 | noncoding |
| MSTRG. 28880. 1  | 0. 561556  | coding    |
| MSTRG. 28880. 3  | 1. 32887   | coding    |
| MSTRG. 28880. 2  | 2. 23474   | coding    |
| MSTRG. 28880. 4  | 0. 62628   | coding    |
| MSTRG. 28882. 1  | -0. 087132 | noncoding |
| MSTRG. 28883. 1  | 0. 38996   | coding    |
| MSTRG. 28884. 1  | -1. 63621  | noncoding |
| MSTRG. 28885. 2  | -0. 428098 | noncoding |
| MSTRG. 28885. 3  | -0. 374156 | noncoding |
| MSTRG. 28886. 2  | 1. 22118   | coding    |
| MSTRG. 28887. 1  | 1. 88783   | coding    |
| MSTRG. 28887. 2  | 1. 56283   | coding    |
| MSTRG. 28887. 4  | 1. 95741   | coding    |
| MSTRG. 28888. 1  | 2. 0196    | coding    |
| MSTRG. 28873. 1  | -0. 431293 | noncoding |
| MSTRG. 28876. 1  | 1. 20126   | coding    |
| MSTRG. 28890. 1  | 2. 14116   | coding    |
| MSTRG. 28890. 5  | 2. 20451   | coding    |
| MSTRG. 28890. 6  | 2. 34571   | coding    |
| MSTRG. 28890. 4  | 1. 41599   | coding    |
| MSTRG. 28890. 3  | 1. 49101   | coding    |
| MSTRG. 28893. 1  | 0. 731585  | coding    |
| MSTRG. 28892. 2  | 1. 038     | coding    |
| MSTRG. 28894. 1  | -1. 36363  | noncoding |
| MSTRG. 28894. 2  | -2. 14695  | noncoding |
| MSTRG. 28900. 3  | 0. 904882  | coding    |
| MSTRG. 28905. 2  | 1. 50996   | coding    |
| MSTRG. 28907. 1  | 0. 924339  | coding    |

|                  |            |           |
|------------------|------------|-----------|
| MSTRG. 28908. 1  | 0. 375473  | coding    |
| MSTRG. 28914. 1  | 1. 33299   | coding    |
| MSTRG. 28914. 2  | 1. 60292   | coding    |
| MSTRG. 28914. 3  | 1. 64291   | coding    |
| MSTRG. 28917. 1  | -0. 45626  | noncoding |
| MSTRG. 28920. 1  | -0. 47853  | noncoding |
| MSTRG. 28923. 4  | 1. 84863   | coding    |
| MSTRG. 28923. 3  | 1. 8395    | coding    |
| MSTRG. 28923. 5  | 1. 76178   | coding    |
| MSTRG. 28923. 7  | 1. 80731   | coding    |
| MSTRG. 28923. 6  | 1. 66189   | coding    |
| MSTRG. 28923. 8  | 1. 75933   | coding    |
| MSTRG. 28934. 1  | 0. 493296  | coding    |
| MSTRG. 28935. 1  | 0. 407222  | coding    |
| MSTRG. 28936. 1  | 0. 216826  | coding    |
| MSTRG. 28937. 1  | -0. 917229 | noncoding |
| MSTRG. 28933. 3  | -0. 469826 | noncoding |
| MSTRG. 28941. 1  | -1. 30764  | noncoding |
| MSTRG. 28942. 1  | -0. 089369 | noncoding |
| MSTRG. 28940. 4  | 0. 494376  | coding    |
| MSTRG. 28949. 2  | 1. 08405   | coding    |
| MSTRG. 28949. 4  | 1. 00098   | coding    |
| MSTRG. 28951. 2  | 1. 24381   | coding    |
| MSTRG. 28951. 1  | 2. 60081   | coding    |
| MSTRG. 28951. 6  | 1. 46255   | coding    |
| MSTRG. 28951. 5  | 2. 06454   | coding    |
| MSTRG. 28952. 1  | -0. 744403 | noncoding |
| MSTRG. 28953. 1  | 0. 065167  | coding    |
| MSTRG. 28947. 1  | 2. 56002   | coding    |
| MSTRG. 28961. 6  | 1. 68393   | coding    |
| MSTRG. 28961. 8  | 1. 6388    | coding    |
| MSTRG. 28961. 4  | 1. 72418   | coding    |
| MSTRG. 28961. 5  | 1. 77758   | coding    |
| MSTRG. 28961. 3  | 1. 57592   | coding    |
| MSTRG. 28961. 7  | 1. 68291   | coding    |
| MSTRG. 28961. 10 | 1. 57414   | coding    |
| MSTRG. 28961. 12 | 1. 6704    | coding    |
| MSTRG. 28961. 9  | 1. 50031   | coding    |
| MSTRG. 28961. 13 | -0. 898462 | noncoding |
| MSTRG. 28961. 14 | -2. 32251  | noncoding |
| MSTRG. 28961. 15 | -2. 32232  | noncoding |
| MSTRG. 28961. 16 | -2. 32184  | noncoding |
| MSTRG. 28963. 1  | 1. 19111   | coding    |
| MSTRG. 28967. 1  | -0. 63494  | noncoding |
| MSTRG. 28975. 1  | -2. 58895  | noncoding |
| MSTRG. 28980. 2  | -0. 337259 | noncoding |
| MSTRG. 28976. 2  | 0. 69449   | coding    |
| MSTRG. 28976. 3  | 0. 575724  | coding    |
| MSTRG. 28977. 1  | -2. 15169  | noncoding |
| MSTRG. 28976. 4  | -0. 344546 | noncoding |
| MSTRG. 28987. 2  | 0. 569076  | coding    |
| MSTRG. 28988. 2  | 1. 30002   | coding    |
| MSTRG. 28988. 3  | 1. 77468   | coding    |
| MSTRG. 28990. 1  | 0. 574746  | coding    |

|                  |            |           |
|------------------|------------|-----------|
| MSTRG. 28988. 4  | -0. 519821 | noncoding |
| MSTRG. 28988. 5  | 1. 36506   | coding    |
| MSTRG. 28988. 6  | 1. 39179   | coding    |
| MSTRG. 28988. 8  | 1. 91482   | coding    |
| MSTRG. 28988. 9  | 1. 90288   | coding    |
| MSTRG. 28988. 10 | 1. 72779   | coding    |
| MSTRG. 28988. 11 | 2. 26268   | coding    |
| MSTRG. 28988. 12 | 1. 84091   | coding    |
| MSTRG. 28993. 2  | 1. 30576   | coding    |
| MSTRG. 28993. 3  | 2. 03322   | coding    |
| MSTRG. 29016. 1  | -1. 30216  | noncoding |
| MSTRG. 29017. 8  | 1. 29063   | coding    |
| MSTRG. 29017. 9  | 1. 8111    | coding    |
| MSTRG. 29017. 10 | 1. 11884   | coding    |
| MSTRG. 29017. 12 | 0. 825413  | coding    |
| MSTRG. 29017. 13 | 0. 80286   | coding    |
| MSTRG. 29017. 11 | 1. 94348   | coding    |
| MSTRG. 29000. 1  | -0. 095205 | noncoding |
| MSTRG. 29008. 1  | 0. 264549  | coding    |
| MSTRG. 29009. 1  | 0. 17486   | coding    |
| MSTRG. 29013. 3  | 0. 787474  | coding    |
| MSTRG. 28996. 1  | 0. 109217  | coding    |
| MSTRG. 29020. 2  | 1. 55759   | coding    |
| MSTRG. 29020. 3  | 0. 625957  | coding    |
| MSTRG. 29021. 1  | 0. 17022   | coding    |
| MSTRG. 29022. 1  | -1. 9937   | noncoding |
| MSTRG. 29019. 1  | -1. 55175  | noncoding |
| MSTRG. 29024. 2  | 0. 267204  | coding    |
| MSTRG. 29024. 4  | 0. 226839  | coding    |
| MSTRG. 29028. 3  | 1. 98741   | coding    |
| MSTRG. 29026. 3  | 0. 561161  | coding    |
| MSTRG. 29027. 1  | -0. 693387 | noncoding |
| MSTRG. 29029. 1  | 0. 525861  | coding    |
| MSTRG. 29034. 1  | -0. 493349 | noncoding |
| MSTRG. 29035. 1  | 1. 86305   | coding    |
| MSTRG. 29037. 1  | -1. 27029  | noncoding |
| MSTRG. 29041. 1  | 0. 549107  | coding    |
| MSTRG. 29041. 5  | 1. 81907   | coding    |
| MSTRG. 29041. 4  | 1. 64649   | coding    |
| MSTRG. 29041. 7  | 1. 96445   | coding    |
| MSTRG. 29043. 1  | 0. 391504  | coding    |
| MSTRG. 29043. 2  | 1. 23151   | coding    |
| MSTRG. 29043. 3  | 1. 55101   | coding    |
| MSTRG. 29045. 1  | 1. 50997   | coding    |
| MSTRG. 29049. 4  | 1. 2817    | coding    |
| MSTRG. 29051. 2  | -1. 54322  | noncoding |
| MSTRG. 29054. 4  | 2. 08433   | coding    |
| MSTRG. 29054. 5  | 1. 46687   | coding    |
| MSTRG. 29055. 1  | 0. 339124  | coding    |
| MSTRG. 29064. 3  | 1. 01312   | coding    |
| MSTRG. 29064. 4  | 0. 933443  | coding    |
| MSTRG. 29064. 6  | 0. 813459  | coding    |
| MSTRG. 29065. 1  | 0. 074783  | coding    |
| MSTRG. 29065. 2  | -0. 933175 | noncoding |

|                  |            |           |
|------------------|------------|-----------|
| MSTRG. 29068. 1  | -0. 557927 | noncoding |
| MSTRG. 29068. 3  | -0. 262431 | noncoding |
| MSTRG. 29079. 2  | -1. 37745  | noncoding |
| MSTRG. 29079. 1  | 2. 86185   | coding    |
| MSTRG. 29079. 4  | -1. 55776  | noncoding |
| MSTRG. 29079. 3  | 2. 89663   | coding    |
| MSTRG. 29079. 5  | 2. 85921   | coding    |
| MSTRG. 29080. 1  | 0. 015645  | coding    |
| MSTRG. 29086. 2  | 0. 804816  | coding    |
| MSTRG. 29086. 3  | 0. 784016  | coding    |
| MSTRG. 29082. 3  | 1. 82698   | coding    |
| MSTRG. 29082. 4  | 2. 02076   | coding    |
| MSTRG. 29083. 1  | -0. 753573 | noncoding |
| MSTRG. 29085. 1  | 0. 878366  | coding    |
| MSTRG. 29092. 2  | 1. 3848    | coding    |
| MSTRG. 29092. 6  | 1. 53353   | coding    |
| MSTRG. 29092. 7  | 1. 1316    | coding    |
| MSTRG. 29092. 5  | 1. 35284   | coding    |
| MSTRG. 29093. 4  | 0. 87203   | coding    |
| MSTRG. 29094. 1  | -1. 84091  | noncoding |
| MSTRG. 29099. 2  | 1. 3208    | coding    |
| MSTRG. 29101. 1  | -0. 265349 | noncoding |
| MSTRG. 29101. 2  | -0. 265033 | noncoding |
| MSTRG. 29107. 1  | -2. 07626  | noncoding |
| MSTRG. 29108. 1  | -2. 18454  | noncoding |
| MSTRG. 29111. 3  | 1. 59583   | coding    |
| MSTRG. 29111. 4  | 1. 66115   | coding    |
| MSTRG. 29111. 2  | 1. 50751   | coding    |
| MSTRG. 29120. 3  | 0. 22215   | coding    |
| MSTRG. 29120. 4  | 0. 346521  | coding    |
| MSTRG. 29121. 1  | 1. 67897   | coding    |
| MSTRG. 29121. 3  | 1. 53417   | coding    |
| MSTRG. 29113. 1  | -1. 00213  | noncoding |
| MSTRG. 29115. 1  | -3. 04341  | noncoding |
| MSTRG. 29128. 1  | 0. 601827  | coding    |
| MSTRG. 29129. 1  | -1. 09274  | noncoding |
| MSTRG. 29129. 2  | -0. 990739 | noncoding |
| MSTRG. 29130. 1  | 0. 256679  | coding    |
| MSTRG. 29122. 1  | -1. 64453  | noncoding |
| MSTRG. 29126. 1  | -2. 22468  | noncoding |
| MSTRG. 29133. 1  | -0. 594859 | noncoding |
| MSTRG. 29136. 2  | 2. 35053   | coding    |
| MSTRG. 29136. 5  | 1. 90279   | coding    |
| MSTRG. 29136. 1  | 2. 0203    | coding    |
| MSTRG. 29137. 1  | -1. 77212  | noncoding |
| MSTRG. 29155. 4  | 1. 45614   | coding    |
| MSTRG. 29155. 6  | 1. 53523   | coding    |
| MSTRG. 29155. 1  | 1. 57322   | coding    |
| MSTRG. 29155. 8  | 1. 62044   | coding    |
| MSTRG. 29155. 11 | 1. 25253   | coding    |
| MSTRG. 29155. 15 | 0. 80926   | coding    |
| MSTRG. 29155. 16 | 1. 37332   | coding    |
| MSTRG. 29155. 17 | 1. 40702   | coding    |
| MSTRG. 29155. 19 | 0. 346108  | coding    |



|                  |            |           |
|------------------|------------|-----------|
| MSTRG. 29157. 1  | 0. 39692   | coding    |
| MSTRG. 29155. 22 | 0. 310789  | coding    |
| MSTRG. 29160. 1  | 0. 628651  | coding    |
| MSTRG. 29161. 1  | -1. 78998  | noncoding |
| MSTRG. 29142. 1  | -0. 175012 | noncoding |
| MSTRG. 29143. 1  | 0. 240994  | coding    |
| MSTRG. 29144. 3  | 1. 87363   | coding    |
| MSTRG. 29149. 2  | 1. 74195   | coding    |
| MSTRG. 29149. 8  | 1. 62206   | coding    |
| MSTRG. 29149. 9  | 1. 4913    | coding    |
| MSTRG. 29149. 10 | 0. 50811   | coding    |
| MSTRG. 29149. 11 | 0. 578925  | coding    |
| MSTRG. 29150. 1  | 2. 49743   | coding    |
| MSTRG. 29150. 2  | 2. 41631   | coding    |
| MSTRG. 29150. 3  | 2. 32427   | coding    |
| MSTRG. 29150. 4  | 2. 24067   | coding    |
| MSTRG. 29150. 5  | 2. 10988   | coding    |
| MSTRG. 29150. 6  | 2. 33793   | coding    |
| MSTRG. 29150. 7  | 2. 68591   | coding    |
| MSTRG. 29150. 8  | 2. 49669   | coding    |
| MSTRG. 29165. 3  | 0. 637319  | coding    |
| MSTRG. 29162. 1  | -1. 79236  | noncoding |
| MSTRG. 29162. 2  | -2. 09614  | noncoding |
| MSTRG. 29163. 1  | -0. 983398 | noncoding |
| MSTRG. 29172. 1  | -2. 28146  | noncoding |
| MSTRG. 29191. 1  | -1. 33449  | noncoding |
| MSTRG. 29192. 1  | -0. 114528 | noncoding |
| MSTRG. 29195. 1  | -0. 078267 | noncoding |
| MSTRG. 29195. 2  | -0. 451143 | noncoding |
| MSTRG. 29195. 3  | -1. 25203  | noncoding |
| MSTRG. 29195. 4  | -1. 31593  | noncoding |
| MSTRG. 29201. 1  | -2. 59612  | noncoding |
| MSTRG. 29202. 4  | 2. 54175   | coding    |
| MSTRG. 29202. 6  | 0. 849665  | coding    |
| MSTRG. 29202. 7  | 1. 78474   | coding    |
| MSTRG. 29202. 8  | -0. 740064 | noncoding |
| MSTRG. 29202. 9  | 0. 106428  | coding    |
| MSTRG. 29196. 1  | -0. 870944 | noncoding |
| MSTRG. 29198. 1  | 1. 3091    | coding    |
| MSTRG. 29198. 2  | 1. 3677    | coding    |
| MSTRG. 29198. 4  | -0. 058003 | noncoding |
| MSTRG. 29207. 2  | 2. 09656   | coding    |
| MSTRG. 29207. 3  | 2. 11721   | coding    |
| MSTRG. 29208. 1  | -2. 16315  | noncoding |
| MSTRG. 29213. 1  | -2. 32636  | noncoding |
| MSTRG. 29214. 1  | 0. 176606  | coding    |
| MSTRG. 29215. 1  | 0. 16349   | coding    |
| MSTRG. 29219. 1  | -1. 40039  | noncoding |
| MSTRG. 29231. 1  | -0. 925157 | noncoding |
| MSTRG. 29231. 2  | -1. 10468  | noncoding |
| MSTRG. 29229. 16 | -0. 876513 | noncoding |
| MSTRG. 29232. 1  | -0. 364378 | noncoding |
| MSTRG. 29232. 2  | -1. 30178  | noncoding |
| MSTRG. 29221. 2  | -0. 157782 | noncoding |

|                 |            |           |
|-----------------|------------|-----------|
| MSTRG. 29224. 2 | 0. 584997  | coding    |
| MSTRG. 29226. 2 | -0. 299265 | noncoding |
| MSTRG. 29226. 3 | -0. 299265 | noncoding |
| MSTRG. 29233. 3 | 0. 069794  | coding    |
| MSTRG. 29238. 2 | 0. 359521  | coding    |
| MSTRG. 29239. 3 | 1. 68662   | coding    |
| MSTRG. 29240. 1 | 0. 173953  | coding    |
| MSTRG. 29242. 2 | 1. 88412   | coding    |
| MSTRG. 29242. 3 | 2. 00753   | coding    |
| MSTRG. 29242. 5 | 1. 75612   | coding    |
| MSTRG. 29242. 6 | 1. 28444   | coding    |
| MSTRG. 29246. 3 | 1. 86252   | coding    |
| MSTRG. 29257. 4 | -0. 082338 | noncoding |
| MSTRG. 29257. 2 | -0. 731139 | noncoding |
| MSTRG. 29258. 1 | -0. 598683 | noncoding |
| MSTRG. 29258. 2 | -0. 439104 | noncoding |
| MSTRG. 29258. 4 | -0. 517849 | noncoding |
| MSTRG. 29258. 5 | -0. 53677  | noncoding |
| MSTRG. 29258. 6 | -1. 19451  | noncoding |
| MSTRG. 29258. 9 | -0. 477384 | noncoding |
| MSTRG. 29260. 1 | -1. 18626  | noncoding |
| MSTRG. 29262. 2 | -0. 027088 | noncoding |
| MSTRG. 29254. 1 | 0. 825157  | coding    |
| MSTRG. 29255. 4 | 0. 35658   | coding    |
| MSTRG. 29268. 1 | -0. 919646 | noncoding |
| MSTRG. 29271. 3 | 0. 412468  | coding    |
| MSTRG. 29271. 5 | 0. 629047  | coding    |
| MSTRG. 29276. 1 | 2. 16693   | coding    |
| MSTRG. 29276. 3 | 2. 12985   | coding    |
| MSTRG. 29278. 1 | 1. 09169   | coding    |
| MSTRG. 29278. 2 | 0. 736054  | coding    |
| MSTRG. 29278. 3 | 0. 755528  | coding    |
| MSTRG. 29279. 2 | -0. 166651 | noncoding |
| MSTRG. 29281. 3 | 1. 3196    | coding    |
| MSTRG. 29282. 2 | 0. 669798  | coding    |
| MSTRG. 29283. 2 | -1. 10724  | noncoding |
| MSTRG. 29283. 3 | -0. 898929 | noncoding |
| MSTRG. 29283. 4 | -1. 13359  | noncoding |
| MSTRG. 29283. 5 | -1. 22845  | noncoding |
| MSTRG. 29301. 1 | -1. 52556  | noncoding |
| MSTRG. 29302. 3 | 2. 23397   | coding    |
| MSTRG. 29302. 1 | 2. 82289   | coding    |
| MSTRG. 29305. 2 | 1. 59082   | coding    |
| MSTRG. 29305. 3 | 1. 1173    | coding    |
| MSTRG. 29307. 3 | 0. 308167  | coding    |
| MSTRG. 29308. 4 | 1. 60215   | coding    |
| MSTRG. 29308. 5 | 1. 1895    | coding    |
| MSTRG. 29308. 6 | 1. 21668   | coding    |
| MSTRG. 29308. 7 | 1. 18247   | coding    |
| MSTRG. 29293. 2 | 0. 936083  | coding    |
| MSTRG. 29298. 1 | 0. 425734  | coding    |
| MSTRG. 29325. 2 | 1. 21738   | coding    |
| MSTRG. 29328. 7 | -0. 369426 | noncoding |
| MSTRG. 29328. 9 | -0. 437406 | noncoding |

|                  |            |           |
|------------------|------------|-----------|
| MSTRG. 29328. 8  | 1. 16683   | coding    |
| MSTRG. 29333. 2  | 2. 43366   | coding    |
| MSTRG. 29334. 1  | 1. 97778   | coding    |
| MSTRG. 29334. 5  | -1. 00775  | noncoding |
| MSTRG. 29341. 3  | 1. 24688   | coding    |
| MSTRG. 29342. 1  | 1. 12965   | coding    |
| MSTRG. 29342. 2  | 0. 89023   | coding    |
| MSTRG. 29343. 1  | 0. 373787  | coding    |
| MSTRG. 29342. 4  | 0. 487554  | coding    |
| MSTRG. 29356. 21 | -1. 04407  | noncoding |
| MSTRG. 29356. 18 | -0. 475595 | noncoding |
| MSTRG. 29356. 9  | -0. 641779 | noncoding |
| MSTRG. 29356. 12 | -0. 292206 | noncoding |
| MSTRG. 29356. 13 | -0. 605733 | noncoding |
| MSTRG. 29356. 14 | -0. 595977 | noncoding |
| MSTRG. 29356. 16 | -0. 556553 | noncoding |
| MSTRG. 29356. 5  | -0. 563    | noncoding |
| MSTRG. 29356. 6  | -0. 652813 | noncoding |
| MSTRG. 29356. 8  | -0. 588192 | noncoding |
| MSTRG. 29356. 15 | -0. 587051 | noncoding |
| MSTRG. 29356. 19 | -0. 599056 | noncoding |
| MSTRG. 29356. 22 | -0. 368929 | noncoding |
| MSTRG. 29356. 23 | -0. 630341 | noncoding |
| MSTRG. 29356. 24 | -0. 343622 | noncoding |
| MSTRG. 29347. 1  | 1. 37615   | coding    |
| MSTRG. 29353. 1  | -1. 04173  | noncoding |
| MSTRG. 29354. 1  | -0. 516685 | noncoding |
| MSTRG. 29359. 2  | 1. 50392   | coding    |
| MSTRG. 29361. 1  | -1. 19737  | noncoding |
| MSTRG. 29363. 1  | -2. 01045  | noncoding |
| MSTRG. 29364. 1  | -0. 212536 | noncoding |
| MSTRG. 29367. 2  | -0. 225318 | noncoding |
| MSTRG. 29370. 2  | 1. 43552   | coding    |
| MSTRG. 29375. 2  | 1. 1088    | coding    |
| MSTRG. 29376. 3  | 0. 212939  | coding    |
| MSTRG. 29387. 1  | 1. 31377   | coding    |
| MSTRG. 29387. 6  | 1. 50375   | coding    |
| MSTRG. 29389. 1  | 0. 834431  | coding    |
| MSTRG. 29388. 6  | 1. 10413   | coding    |
| MSTRG. 29378. 1  | -1. 5052   | noncoding |
| MSTRG. 29380. 1  | 0. 013479  | coding    |
| MSTRG. 29379. 3  | 2. 33857   | coding    |
| MSTRG. 29393. 3  | -0. 079024 | noncoding |
| MSTRG. 29393. 2  | -0. 002222 | noncoding |
| MSTRG. 29393. 4  | -0. 234278 | noncoding |
| MSTRG. 29393. 5  | -0. 177044 | noncoding |
| MSTRG. 29393. 6  | -0. 299516 | noncoding |
| MSTRG. 29393. 7  | -0. 091176 | noncoding |
| MSTRG. 29405. 2  | 1. 873     | coding    |
| MSTRG. 29409. 2  | 0. 857567  | coding    |
| MSTRG. 29409. 3  | 0. 93995   | coding    |
| MSTRG. 29411. 1  | 0. 2716    | coding    |
| MSTRG. 29412. 1  | 1. 84781   | coding    |
| MSTRG. 29417. 3  | 0. 544024  | coding    |

|                 |            |           |
|-----------------|------------|-----------|
| MSTRG. 29417. 4 | 0. 458654  | coding    |
| MSTRG. 29418. 4 | 0. 956733  | coding    |
| MSTRG. 29420. 2 | 0. 637441  | coding    |
| MSTRG. 29420. 1 | 1. 17938   | coding    |
| MSTRG. 29425. 2 | 1. 16764   | coding    |
| MSTRG. 29425. 5 | 1. 21449   | coding    |
| MSTRG. 29425. 6 | 1. 17505   | coding    |
| MSTRG. 29425. 7 | 1. 02153   | coding    |
| MSTRG. 29426. 3 | 1. 40998   | coding    |
| MSTRG. 29426. 4 | 1. 33287   | coding    |
| MSTRG. 29426. 5 | 1. 40224   | coding    |
| MSTRG. 29426. 6 | 1. 3412    | coding    |
| MSTRG. 29395. 2 | 1. 09933   | coding    |
| MSTRG. 29404. 5 | 0. 658012  | coding    |
| MSTRG. 29404. 3 | 0. 545184  | coding    |
| MSTRG. 29404. 6 | 0. 760793  | coding    |
| MSTRG. 29404. 7 | 0. 671558  | coding    |
| MSTRG. 29428. 3 | 1. 3697    | coding    |
| MSTRG. 29436. 3 | 0. 31766   | coding    |
| MSTRG. 29432. 3 | 2. 26093   | coding    |
| MSTRG. 29445. 1 | 0. 918262  | coding    |
| MSTRG. 29447. 1 | 0. 80304   | coding    |
| MSTRG. 29447. 2 | -0. 509721 | noncoding |
| MSTRG. 29449. 1 | -1. 68368  | noncoding |
| MSTRG. 29450. 1 | -2. 44106  | noncoding |
| MSTRG. 29447. 6 | 1. 10782   | coding    |
| MSTRG. 29447. 7 | 1. 65015   | coding    |
| MSTRG. 29440. 2 | 1. 37739   | coding    |
| MSTRG. 29455. 4 | 1. 89083   | coding    |
| MSTRG. 29455. 6 | 2. 32848   | coding    |
| MSTRG. 29455. 7 | 0. 39135   | coding    |
| MSTRG. 29454. 1 | -1. 69018  | noncoding |
| MSTRG. 29458. 1 | -1. 31151  | noncoding |
| MSTRG. 29457. 2 | -0. 494925 | noncoding |
| MSTRG. 29463. 1 | 0. 618056  | coding    |
| MSTRG. 29463. 7 | 0. 713832  | coding    |
| MSTRG. 29463. 6 | 0. 045811  | coding    |
| MSTRG. 29466. 1 | 0. 204011  | coding    |
| MSTRG. 29466. 3 | 0. 364606  | coding    |
| MSTRG. 29467. 2 | 1. 87905   | coding    |
| MSTRG. 29467. 3 | 1. 43236   | coding    |
| MSTRG. 29467. 4 | -1. 31094  | noncoding |
| MSTRG. 29467. 5 | -1. 46969  | noncoding |
| MSTRG. 29481. 2 | 1. 20053   | coding    |
| MSTRG. 29482. 2 | -0. 862345 | noncoding |
| MSTRG. 29481. 3 | 1. 3083    | coding    |
| MSTRG. 29470. 1 | -1. 61388  | noncoding |
| MSTRG. 29470. 2 | -1. 70031  | noncoding |
| MSTRG. 29471. 1 | -0. 146923 | noncoding |
| MSTRG. 29484. 1 | -2. 33916  | noncoding |
| MSTRG. 29495. 2 | 0. 716394  | coding    |
| MSTRG. 29495. 3 | 1. 8383    | coding    |
| MSTRG. 29497. 1 | 1. 74276   | coding    |
| MSTRG. 29499. 4 | 0. 763375  | coding    |

|                  |            |           |
|------------------|------------|-----------|
| MSTRG. 29497. 4  | 1. 68053   | coding    |
| MSTRG. 29497. 3  | 1. 8138    | coding    |
| MSTRG. 29500. 1  | 0. 380975  | coding    |
| MSTRG. 29504. 3  | 2. 28692   | coding    |
| MSTRG. 29504. 4  | 2. 25353   | coding    |
| MSTRG. 29504. 2  | 2. 22982   | coding    |
| MSTRG. 29506. 3  | 0. 715674  | coding    |
| MSTRG. 29502. 2  | 0. 687217  | coding    |
| MSTRG. 29502. 3  | 0. 391687  | coding    |
| MSTRG. 29502. 4  | 1. 22066   | coding    |
| MSTRG. 29509. 1  | 2. 54553   | coding    |
| MSTRG. 29509. 2  | 2. 51935   | coding    |
| MSTRG. 29509. 3  | 2. 16325   | coding    |
| MSTRG. 29511. 2  | 1. 37382   | coding    |
| MSTRG. 29511. 3  | 1. 40456   | coding    |
| MSTRG. 29511. 4  | 1. 43036   | coding    |
| MSTRG. 29511. 5  | 1. 11811   | coding    |
| MSTRG. 29513. 1  | -1. 24622  | noncoding |
| MSTRG. 29510. 1  | -2. 05123  | noncoding |
| MSTRG. 29512. 1  | -1. 53121  | noncoding |
| MSTRG. 29521. 2  | 0. 322795  | coding    |
| MSTRG. 29521. 3  | 0. 931501  | coding    |
| MSTRG. 29521. 4  | 2. 70619   | coding    |
| MSTRG. 29524. 1  | -1. 80543  | noncoding |
| MSTRG. 29517. 1  | 1. 6676    | coding    |
| MSTRG. 29525. 1  | 0. 196203  | coding    |
| MSTRG. 29525. 3  | -0. 010693 | noncoding |
| MSTRG. 29525. 4  | 0. 374477  | coding    |
| MSTRG. 29526. 1  | -0. 068789 | noncoding |
| MSTRG. 29532. 5  | 1. 32444   | coding    |
| MSTRG. 29533. 5  | 0. 394385  | coding    |
| MSTRG. 29533. 6  | 0. 610489  | coding    |
| MSTRG. 29535. 2  | 0. 207022  | coding    |
| MSTRG. 29535. 3  | -0. 000372 | noncoding |
| MSTRG. 29535. 5  | 0. 757498  | coding    |
| MSTRG. 29535. 4  | 0. 72393   | coding    |
| MSTRG. 29536. 1  | 1. 30011   | coding    |
| MSTRG. 29530. 1  | 1. 43243   | coding    |
| MSTRG. 29530. 3  | 0. 684957  | coding    |
| MSTRG. 29531. 3  | -0. 743323 | noncoding |
| MSTRG. 29537. 3  | 0. 476464  | coding    |
| MSTRG. 29537. 4  | 0. 416267  | coding    |
| MSTRG. 29557. 1  | 0. 492753  | coding    |
| MSTRG. 29557. 2  | -0. 00054  | noncoding |
| MSTRG. 29557. 3  | 0. 107539  | coding    |
| MSTRG. 29557. 4  | 0. 716183  | coding    |
| MSTRG. 29557. 5  | 0. 90207   | coding    |
| MSTRG. 29557. 6  | 0. 678514  | coding    |
| MSTRG. 29557. 7  | 0. 375055  | coding    |
| MSTRG. 29557. 8  | 0. 363306  | coding    |
| MSTRG. 29557. 10 | 1. 22608   | coding    |
| MSTRG. 29558. 5  | 1. 50475   | coding    |
| MSTRG. 29558. 6  | -2. 01321  | noncoding |
| MSTRG. 29558. 7  | -1. 32853  | noncoding |

|                  |            |           |
|------------------|------------|-----------|
| MSTRG. 29559. 3  | 0. 879488  | coding    |
| MSTRG. 29559. 4  | 0. 818465  | coding    |
| MSTRG. 29560. 1  | 0. 437426  | coding    |
| MSTRG. 29561. 1  | 0. 015102  | coding    |
| MSTRG. 29565. 1  | 2. 89762   | coding    |
| MSTRG. 29566. 1  | -1. 22695  | noncoding |
| MSTRG. 29566. 2  | 0. 766676  | coding    |
| MSTRG. 29567. 1  | 1. 12895   | coding    |
| MSTRG. 29566. 3  | -0. 289919 | noncoding |
| MSTRG. 29544. 1  | -1. 15928  | noncoding |
| MSTRG. 29543. 2  | 2. 84436   | coding    |
| MSTRG. 29545. 1  | 1. 12578   | coding    |
| MSTRG. 29546. 1  | -0. 424203 | noncoding |
| MSTRG. 29550. 1  | 1. 90605   | coding    |
| MSTRG. 29550. 2  | 1. 66519   | coding    |
| MSTRG. 29551. 1  | 0. 993576  | coding    |
| MSTRG. 29552. 2  | 1. 45319   | coding    |
| MSTRG. 29553. 1  | 0. 310894  | coding    |
| MSTRG. 29553. 2  | 0. 206505  | coding    |
| MSTRG. 29553. 3  | -0. 249738 | noncoding |
| MSTRG. 29553. 4  | -0. 015041 | noncoding |
| MSTRG. 29553. 5  | -0. 182575 | noncoding |
| MSTRG. 29553. 6  | -0. 181142 | noncoding |
| MSTRG. 29553. 7  | 0. 088627  | coding    |
| MSTRG. 29554. 2  | 0. 547923  | coding    |
| MSTRG. 29556. 1  | 0. 854713  | coding    |
| MSTRG. 29548. 2  | 1. 60379   | coding    |
| MSTRG. 29548. 1  | 1. 77975   | coding    |
| MSTRG. 29547. 1  | -0. 527289 | noncoding |
| MSTRG. 29571. 1  | -0. 99904  | noncoding |
| MSTRG. 29576. 3  | 1. 13768   | coding    |
| MSTRG. 29576. 4  | 0. 718731  | coding    |
| MSTRG. 29578. 3  | 0. 23087   | coding    |
| MSTRG. 29580. 1  | -2. 09958  | noncoding |
| MSTRG. 29583. 2  | 2. 45618   | coding    |
| MSTRG. 29583. 4  | 1. 82391   | coding    |
| MSTRG. 29584. 1  | -1. 53223  | noncoding |
| MSTRG. 29585. 2  | 2. 31502   | coding    |
| MSTRG. 29593. 2  | 0. 920897  | coding    |
| MSTRG. 29594. 3  | 0. 03964   | coding    |
| MSTRG. 29596. 1  | -1. 91653  | noncoding |
| MSTRG. 29588. 2  | 2. 28063   | coding    |
| MSTRG. 29598. 1  | 1. 56933   | coding    |
| MSTRG. 29600. 2  | 1. 16624   | coding    |
| MSTRG. 29601. 1  | -0. 389217 | noncoding |
| MSTRG. 29599. 1  | -2. 01684  | noncoding |
| MSTRG. 29599. 2  | -1. 75282  | noncoding |
| MSTRG. 29603. 3  | 2. 07629   | coding    |
| MSTRG. 29607. 6  | -0. 060755 | noncoding |
| MSTRG. 29607. 11 | -1. 55001  | noncoding |
| MSTRG. 29607. 10 | 0. 768746  | coding    |
| MSTRG. 29607. 5  | 1. 44802   | coding    |
| MSTRG. 29608. 1  | 0. 495238  | coding    |
| MSTRG. 29620. 1  | 1. 2634    | coding    |

|                  |            |           |
|------------------|------------|-----------|
| MSTRG. 29624. 1  | -1. 32904  | noncoding |
| MSTRG. 29625. 1  | -1. 10777  | noncoding |
| MSTRG. 29625. 2  | -0. 756717 | noncoding |
| MSTRG. 29627. 1  | -1. 13183  | noncoding |
| MSTRG. 29633. 2  | -0. 867355 | noncoding |
| MSTRG. 29634. 2  | 1. 95018   | coding    |
| MSTRG. 29635. 2  | 1. 82283   | coding    |
| MSTRG. 29652. 1  | -1. 30712  | noncoding |
| MSTRG. 29654. 1  | 1. 32807   | coding    |
| MSTRG. 29654. 4  | 0. 939893  | coding    |
| MSTRG. 29654. 2  | 0. 990951  | coding    |
| MSTRG. 29654. 5  | 1. 01228   | coding    |
| MSTRG. 29657. 1  | 3. 34862   | coding    |
| MSTRG. 29657. 4  | 3. 41302   | coding    |
| MSTRG. 29657. 9  | 2. 15626   | coding    |
| MSTRG. 29657. 11 | 3. 69951   | coding    |
| MSTRG. 29644. 1  | 0. 376525  | coding    |
| MSTRG. 29647. 2  | -0. 062945 | noncoding |
| MSTRG. 29647. 3  | -0. 133436 | noncoding |
| MSTRG. 29663. 2  | 1. 03953   | coding    |
| MSTRG. 29664. 2  | 0. 130963  | coding    |
| MSTRG. 29666. 5  | 1. 7778    | coding    |
| MSTRG. 29667. 1  | 0. 453958  | coding    |
| MSTRG. 29667. 2  | 0. 508967  | coding    |
| MSTRG. 29667. 3  | 0. 465632  | coding    |
| MSTRG. 29667. 4  | 0. 033729  | coding    |
| MSTRG. 29668. 3  | 1. 09229   | coding    |
| MSTRG. 29672. 2  | 2. 04023   | coding    |
| MSTRG. 29673. 1  | -0. 369952 | noncoding |
| MSTRG. 29673. 3  | -0. 735943 | noncoding |
| MSTRG. 29658. 7  | -0. 676952 | noncoding |
| MSTRG. 29658. 5  | -0. 861158 | noncoding |
| MSTRG. 29675. 2  | 2. 04684   | coding    |
| MSTRG. 29675. 5  | 0. 969175  | coding    |
| MSTRG. 29676. 2  | 0. 106235  | coding    |
| MSTRG. 29676. 1  | 0. 096707  | coding    |
| MSTRG. 29676. 3  | -0. 036732 | noncoding |
| MSTRG. 29676. 4  | -0. 409572 | noncoding |
| MSTRG. 29676. 5  | -0. 524867 | noncoding |
| MSTRG. 29676. 6  | 0. 05906   | coding    |
| MSTRG. 29677. 3  | 0. 945911  | coding    |
| MSTRG. 29677. 6  | 0. 959514  | coding    |
| MSTRG. 29677. 8  | 2. 16556   | coding    |
| MSTRG. 29677. 5  | 1. 90555   | coding    |
| MSTRG. 29677. 7  | 1. 89018   | coding    |
| MSTRG. 29677. 2  | 1. 62063   | coding    |
| MSTRG. 29678. 3  | 1. 1308    | coding    |
| MSTRG. 29678. 2  | 0. 86717   | coding    |
| MSTRG. 29682. 4  | 1. 13543   | coding    |
| MSTRG. 29687. 2  | 1. 23743   | coding    |
| MSTRG. 29687. 3  | 1. 43908   | coding    |
| MSTRG. 29681. 1  | 0. 674585  | coding    |
| MSTRG. 29692. 2  | 1. 01678   | coding    |
| MSTRG. 29692. 3  | 0. 874292  | coding    |

|                  |            |           |
|------------------|------------|-----------|
| MSTRG. 29693. 2  | -1. 41187  | noncoding |
| MSTRG. 29695. 2  | 0. 321633  | coding    |
| MSTRG. 29696. 1  | 1. 31296   | coding    |
| MSTRG. 29696. 2  | -0. 004206 | noncoding |
| MSTRG. 29696. 3  | -2. 01957  | noncoding |
| MSTRG. 29704. 3  | 1. 94239   | coding    |
| MSTRG. 29699. 3  | -0. 88413  | noncoding |
| MSTRG. 29700. 1  | -0. 247856 | noncoding |
| MSTRG. 29700. 2  | 0. 201807  | coding    |
| MSTRG. 29701. 3  | -1. 92333  | noncoding |
| MSTRG. 29722. 1  | 1. 29417   | coding    |
| MSTRG. 29722. 2  | 0. 010286  | coding    |
| MSTRG. 29723. 1  | 0. 203358  | coding    |
| MSTRG. 29723. 3  | -1. 95713  | noncoding |
| MSTRG. 29724. 1  | -0. 71455  | noncoding |
| MSTRG. 29725. 1  | -0. 435053 | noncoding |
| MSTRG. 29726. 1  | -2. 34346  | noncoding |
| MSTRG. 29724. 4  | 0. 226653  | coding    |
| MSTRG. 29724. 5  | -0. 238441 | noncoding |
| MSTRG. 29724. 6  | 1. 14893   | coding    |
| MSTRG. 29727. 1  | -2. 22893  | noncoding |
| MSTRG. 29724. 7  | 1. 10464   | coding    |
| MSTRG. 29724. 10 | 1. 79747   | coding    |
| MSTRG. 29724. 11 | 1. 81985   | coding    |
| MSTRG. 29730. 1  | 0. 962022  | coding    |
| MSTRG. 29735. 6  | 2. 25585   | coding    |
| MSTRG. 29707. 1  | 0. 93753   | coding    |
| MSTRG. 29710. 1  | -1. 06991  | noncoding |
| MSTRG. 29713. 2  | -1. 25275  | noncoding |
| MSTRG. 29715. 3  | 0. 846697  | coding    |
| MSTRG. 29738. 1  | 0. 30021   | coding    |
| MSTRG. 29738. 2  | 0. 265474  | coding    |
| MSTRG. 29738. 3  | 0. 508253  | coding    |
| MSTRG. 29739. 1  | 0. 642086  | coding    |
| MSTRG. 29741. 2  | 1. 3368    | coding    |
| MSTRG. 29747. 1  | 1. 22441   | coding    |
| MSTRG. 29748. 1  | -0. 447508 | noncoding |
| MSTRG. 29755. 2  | 2. 66035   | coding    |
| MSTRG. 29756. 5  | -1. 44735  | noncoding |
| MSTRG. 29757. 1  | 0. 680127  | coding    |
| MSTRG. 29759. 1  | 0. 863737  | coding    |
| MSTRG. 29758. 1  | 0. 911922  | coding    |
| MSTRG. 29763. 1  | 3. 62003   | coding    |
| MSTRG. 29763. 4  | 1. 07185   | coding    |
| MSTRG. 29767. 1  | 1. 56288   | coding    |
| MSTRG. 29767. 2  | 1. 16782   | coding    |
| MSTRG. 29767. 3  | 0. 834073  | coding    |
| MSTRG. 29767. 4  | 0. 933692  | coding    |
| MSTRG. 29767. 5  | 2. 06938   | coding    |
| MSTRG. 29773. 2  | -0. 018405 | noncoding |
| MSTRG. 29774. 1  | 0. 014445  | coding    |
| MSTRG. 29774. 4  | 0. 541075  | coding    |
| MSTRG. 29774. 10 | 0. 07921   | coding    |
| MSTRG. 29774. 9  | 0. 675208  | coding    |



|                  |            |           |
|------------------|------------|-----------|
| MSTRG. 29774. 7  | 0. 802684  | coding    |
| MSTRG. 29774. 12 | -0. 059053 | noncoding |
| MSTRG. 29774. 13 | 0. 629206  | coding    |
| MSTRG. 29774. 15 | 0. 661134  | coding    |
| MSTRG. 29776. 1  | -0. 22481  | noncoding |
| MSTRG. 29769. 2  | 1. 08298   | coding    |
| MSTRG. 29849. 2  | 1. 81939   | coding    |
| MSTRG. 29849. 4  | 1. 83677   | coding    |
| MSTRG. 29849. 3  | 1. 96698   | coding    |
| MSTRG. 29851. 1  | 0. 467501  | coding    |
| MSTRG. 29852. 1  | -0. 169121 | noncoding |
| MSTRG. 29853. 1  | -0. 082433 | noncoding |
| MSTRG. 29854. 1  | -1. 71571  | noncoding |
| MSTRG. 29856. 1  | 0. 182734  | coding    |
| MSTRG. 29857. 1  | 0. 353149  | coding    |
| MSTRG. 29858. 1  | 0. 039317  | coding    |
| MSTRG. 29860. 1  | -0. 23597  | noncoding |
| MSTRG. 29861. 1  | 1. 08992   | coding    |
| MSTRG. 29861. 2  | 1. 02405   | coding    |
| MSTRG. 29861. 3  | 0. 737286  | coding    |
| MSTRG. 29849. 5  | 0. 231623  | coding    |
| MSTRG. 29849. 6  | 0. 511288  | coding    |
| MSTRG. 29849. 7  | 0. 304273  | coding    |
| MSTRG. 29849. 8  | 0. 508533  | coding    |
| MSTRG. 29849. 9  | 0. 684719  | coding    |
| MSTRG. 29849. 10 | -0. 274886 | noncoding |
| MSTRG. 29791. 15 | 1. 03398   | coding    |
| MSTRG. 29791. 16 | 1. 24958   | coding    |
| MSTRG. 29791. 7  | 1. 68179   | coding    |
| MSTRG. 29791. 8  | 2. 21916   | coding    |
| MSTRG. 29791. 13 | 2. 28355   | coding    |
| MSTRG. 29791. 10 | 2. 04675   | coding    |
| MSTRG. 29791. 11 | 1. 95155   | coding    |
| MSTRG. 29791. 9  | 2. 32732   | coding    |
| MSTRG. 29791. 17 | 1. 5253    | coding    |
| MSTRG. 29791. 18 | 1. 1057    | coding    |
| MSTRG. 29792. 1  | -0. 75127  | noncoding |
| MSTRG. 29786. 2  | 1. 76158   | coding    |
| MSTRG. 29787. 1  | 1. 20358   | coding    |
| MSTRG. 29787. 3  | 0. 99742   | coding    |
| MSTRG. 29795. 2  | 1. 07807   | coding    |
| MSTRG. 29796. 1  | -0. 220676 | noncoding |
| MSTRG. 29797. 3  | -0. 123916 | noncoding |
| MSTRG. 29799. 1  | 1. 29387   | coding    |
| MSTRG. 29799. 2  | 0. 174756  | coding    |
| MSTRG. 29799. 3  | 0. 30919   | coding    |
| MSTRG. 29810. 3  | 1. 35131   | coding    |
| MSTRG. 29810. 4  | 1. 39946   | coding    |
| MSTRG. 29810. 7  | 1. 36779   | coding    |
| MSTRG. 29810. 8  | 1. 3597    | coding    |
| MSTRG. 29810. 6  | 1. 06297   | coding    |
| MSTRG. 29810. 2  | 1. 346     | coding    |
| MSTRG. 29810. 9  | 0. 797249  | coding    |
| MSTRG. 29800. 5  | -0. 649547 | noncoding |

|                  |            |           |
|------------------|------------|-----------|
| MSTRG. 29800. 6  | -0. 742199 | noncoding |
| MSTRG. 29801. 3  | 0. 753826  | coding    |
| MSTRG. 29802. 1  | -0. 961574 | noncoding |
| MSTRG. 29815. 4  | 0. 860315  | coding    |
| MSTRG. 29815. 2  | 0. 645684  | coding    |
| MSTRG. 29815. 5  | 0. 922884  | coding    |
| MSTRG. 29815. 6  | 1. 4202    | coding    |
| MSTRG. 29821. 4  | 0. 860965  | coding    |
| MSTRG. 29821. 5  | 0. 630579  | coding    |
| MSTRG. 29825. 2  | 0. 226927  | coding    |
| MSTRG. 29825. 3  | 0. 369693  | coding    |
| MSTRG. 29827. 1  | -0. 166198 | noncoding |
| MSTRG. 29830. 1  | 2. 62705   | coding    |
| MSTRG. 29830. 2  | 2. 65074   | coding    |
| MSTRG. 29834. 1  | 1. 61503   | coding    |
| MSTRG. 29835. 2  | -0. 423707 | noncoding |
| MSTRG. 29836. 2  | 1. 35955   | coding    |
| MSTRG. 29846. 1  | 2. 07298   | coding    |
| MSTRG. 29846. 8  | 1. 62284   | coding    |
| MSTRG. 29846. 7  | 1. 5444    | coding    |
| MSTRG. 29846. 9  | 1. 55906   | coding    |
| MSTRG. 29846. 10 | 0. 316786  | coding    |
| MSTRG. 29846. 11 | 2. 34323   | coding    |
| MSTRG. 29846. 12 | 0. 423591  | coding    |
| MSTRG. 29846. 13 | 0. 333867  | coding    |
| MSTRG. 29846. 14 | 0. 194811  | coding    |
| MSTRG. 29847. 1  | -0. 178452 | noncoding |
| MSTRG. 29845. 1  | 0. 862526  | coding    |
| MSTRG. 29868. 1  | 0. 080549  | coding    |
| MSTRG. 29869. 1  | 0. 569555  | coding    |
| MSTRG. 29869. 3  | -0. 93579  | noncoding |
| MSTRG. 29869. 5  | 0. 076089  | coding    |
| MSTRG. 29869. 4  | -0. 548448 | noncoding |
| MSTRG. 29869. 6  | 0. 157115  | coding    |
| MSTRG. 29869. 7  | 0. 45201   | coding    |
| MSTRG. 29866. 2  | -1. 79787  | noncoding |
| MSTRG. 29867. 1  | -0. 269067 | noncoding |
| MSTRG. 29867. 2  | -1. 25858  | noncoding |
| MSTRG. 29879. 4  | 2. 30279   | coding    |
| MSTRG. 29879. 6  | 1. 47396   | coding    |
| MSTRG. 29879. 7  | 1. 58394   | coding    |
| MSTRG. 29879. 3  | 1. 91756   | coding    |
| MSTRG. 29880. 2  | 2. 75367   | coding    |
| MSTRG. 29880. 3  | 2. 59418   | coding    |
| MSTRG. 29881. 2  | 1. 04793   | coding    |
| MSTRG. 29884. 1  | -0. 544652 | noncoding |
| MSTRG. 29884. 2  | -0. 539118 | noncoding |
| MSTRG. 29884. 3  | -0. 434003 | noncoding |
| MSTRG. 29885. 3  | 2. 12477   | coding    |
| MSTRG. 29890. 4  | -0. 280968 | noncoding |
| MSTRG. 29891. 1  | 0. 687301  | coding    |
| MSTRG. 29891. 2  | 0. 99129   | coding    |
| MSTRG. 29891. 3  | 2. 69391   | coding    |
| MSTRG. 29891. 4  | 2. 68262   | coding    |

|                |           |           |
|----------------|-----------|-----------|
| MSTRG. 29891.6 | 2.19952   | coding    |
| MSTRG. 29891.7 | 2.02402   | coding    |
| MSTRG. 29894.2 | 0.833561  | coding    |
| MSTRG. 29894.3 | 1.88332   | coding    |
| MSTRG. 29894.4 | 1.48314   | coding    |
| MSTRG. 29896.7 | 0.210604  | coding    |
| MSTRG. 29896.6 | -0.779984 | noncoding |
| MSTRG. 29896.4 | 0.351259  | coding    |
| MSTRG. 29896.5 | 0.559964  | coding    |
| MSTRG. 29897.1 | -0.841419 | noncoding |
| MSTRG. 29897.2 | -1.51428  | noncoding |
| MSTRG. 29897.3 | -1.32277  | noncoding |
| MSTRG. 29889.2 | -0.460944 | noncoding |
| MSTRG. 29900.1 | 1.77738   | coding    |
| MSTRG. 29903.3 | 1.73861   | coding    |
| MSTRG. 29903.1 | 1.73637   | coding    |
| MSTRG. 29904.1 | 0.628049  | coding    |
| MSTRG. 29902.1 | -0.623391 | noncoding |
| MSTRG. 29902.2 | 0.343692  | coding    |
| MSTRG. 29902.3 | -0.032271 | noncoding |
| MSTRG. 29910.3 | 0.372365  | coding    |
| MSTRG. 29910.2 | 0.477245  | coding    |
| MSTRG. 29912.2 | 0.219785  | coding    |
| MSTRG. 29912.3 | -0.04378  | noncoding |
| MSTRG. 29912.4 | -0.088279 | noncoding |
| MSTRG. 29912.5 | -0.028185 | noncoding |
| MSTRG. 29912.6 | 0.179027  | coding    |
| MSTRG. 29906.2 | 0.920132  | coding    |
| MSTRG. 29906.4 | 0.731508  | coding    |
| MSTRG. 29908.4 | 0.941843  | coding    |
| MSTRG. 29916.1 | -0.40547  | noncoding |
| MSTRG. 29917.1 | 0.799047  | coding    |
| MSTRG. 29917.3 | 0.788346  | coding    |
| MSTRG. 29918.1 | -1.84036  | noncoding |
| MSTRG. 29920.1 | 0.608446  | coding    |
| MSTRG. 29923.5 | 0.093552  | coding    |
| MSTRG. 29923.6 | 0.529479  | coding    |
| MSTRG. 29921.1 | 1.36471   | coding    |
| MSTRG. 29921.4 | 2.37801   | coding    |
| MSTRG. 29921.5 | 2.2747    | coding    |
| MSTRG. 29926.3 | 1.82007   | coding    |
| MSTRG. 29926.2 | 1.83079   | coding    |
| MSTRG. 29927.3 | 0.721819  | coding    |
| MSTRG. 29934.4 | 0.467193  | coding    |
| MSTRG. 29934.5 | 0.63442   | coding    |
| MSTRG. 29934.8 | -0.437687 | noncoding |
| MSTRG. 29941.3 | 1.18806   | coding    |
| MSTRG. 29941.4 | 1.43463   | coding    |
| MSTRG. 29943.5 | 1.87646   | coding    |
| MSTRG. 29943.3 | 3.49751   | coding    |
| MSTRG. 29943.2 | 3.54594   | coding    |
| MSTRG. 29943.4 | 3.5569    | coding    |
| MSTRG. 29938.1 | -0.593032 | noncoding |
| MSTRG. 29946.2 | 0.637942  | coding    |

|                  |            |           |
|------------------|------------|-----------|
| MSTRG. 29947. 1  | -0. 235368 | noncoding |
| MSTRG. 29949. 1  | 0. 492432  | coding    |
| MSTRG. 29948. 2  | -0. 142615 | noncoding |
| MSTRG. 29950. 4  | 1. 18234   | coding    |
| MSTRG. 29950. 5  | 0. 998727  | coding    |
| MSTRG. 29950. 6  | 1. 33134   | coding    |
| MSTRG. 29965. 1  | 1. 52053   | coding    |
| MSTRG. 29965. 5  | 1. 47183   | coding    |
| MSTRG. 29967. 2  | 1. 2759    | coding    |
| MSTRG. 29970. 1  | 1. 9612    | coding    |
| MSTRG. 29970. 2  | 1. 70859   | coding    |
| MSTRG. 29970. 3  | 1. 62599   | coding    |
| MSTRG. 29970. 4  | 1. 88407   | coding    |
| MSTRG. 29970. 5  | 1. 51838   | coding    |
| MSTRG. 29970. 7  | 1. 64503   | coding    |
| MSTRG. 29970. 8  | 1. 51666   | coding    |
| MSTRG. 29970. 9  | 1. 39993   | coding    |
| MSTRG. 29974. 3  | 1. 3287    | coding    |
| MSTRG. 29974. 2  | 1. 56115   | coding    |
| MSTRG. 29975. 1  | -1. 02406  | noncoding |
| MSTRG. 29954. 1  | -2. 70338  | noncoding |
| MSTRG. 29955. 1  | 0. 538811  | coding    |
| MSTRG. 29957. 2  | 1. 73089   | coding    |
| MSTRG. 29961. 2  | -0. 58087  | noncoding |
| MSTRG. 29980. 5  | -0. 840439 | noncoding |
| MSTRG. 29978. 3  | 1. 09052   | coding    |
| MSTRG. 29978. 1  | 0. 549752  | coding    |
| MSTRG. 29978. 2  | -0. 323971 | noncoding |
| MSTRG. 29985. 3  | 2. 14126   | coding    |
| MSTRG. 29985. 4  | 1. 74742   | coding    |
| MSTRG. 29990. 1  | 2. 69863   | coding    |
| MSTRG. 29990. 2  | 2. 70021   | coding    |
| MSTRG. 29990. 5  | 2. 28328   | coding    |
| MSTRG. 29990. 6  | 2. 72048   | coding    |
| MSTRG. 29990. 7  | 2. 69791   | coding    |
| MSTRG. 29990. 8  | 2. 56037   | coding    |
| MSTRG. 29990. 9  | 2. 44549   | coding    |
| MSTRG. 29990. 10 | 2. 52539   | coding    |
| MSTRG. 29991. 1  | 0. 204023  | coding    |
| MSTRG. 29991. 2  | -0. 741764 | noncoding |
| MSTRG. 29997. 1  | 1. 20703   | coding    |
| MSTRG. 29997. 2  | 0. 933396  | coding    |
| MSTRG. 30003. 7  | 1. 73252   | coding    |
| MSTRG. 30003. 2  | 1. 99972   | coding    |
| MSTRG. 30003. 5  | 2. 09271   | coding    |
| MSTRG. 30003. 4  | 2. 09858   | coding    |
| MSTRG. 30003. 3  | 2. 01851   | coding    |
| MSTRG. 30003. 6  | 2. 0539    | coding    |
| MSTRG. 30003. 8  | 2. 13915   | coding    |
| MSTRG. 30003. 9  | -0. 444677 | noncoding |
| MSTRG. 29998. 1  | -2. 62945  | noncoding |
| MSTRG. 29999. 1  | -1. 4501   | noncoding |
| MSTRG. 30009. 10 | 1. 93791   | coding    |
| MSTRG. 30009. 11 | 1. 90486   | coding    |

|                 |           |           |
|-----------------|-----------|-----------|
| MSTRG. 30009.6  | 1.93703   | coding    |
| MSTRG. 30009.7  | 2.0604    | coding    |
| MSTRG. 30009.15 | 1.29802   | coding    |
| MSTRG. 30009.8  | 1.26917   | coding    |
| MSTRG. 30009.17 | 1.86642   | coding    |
| MSTRG. 30009.18 | 2.00331   | coding    |
| MSTRG. 30009.19 | 1.33453   | coding    |
| MSTRG. 30009.20 | 1.9227    | coding    |
| MSTRG. 30009.21 | 1.96796   | coding    |
| MSTRG. 30009.22 | 1.98593   | coding    |
| MSTRG. 30009.23 | 2.02284   | coding    |
| MSTRG. 30009.24 | 0.931573  | coding    |
| MSTRG. 30005.3  | 1.81499   | coding    |
| MSTRG. 30010.3  | 1.31301   | coding    |
| MSTRG. 30010.1  | 1.30516   | coding    |
| MSTRG. 30010.2  | 1.28283   | coding    |
| MSTRG. 30011.2  | 1.72392   | coding    |
| MSTRG. 30016.2  | 1.32852   | coding    |
| MSTRG. 30016.3  | 1.44681   | coding    |
| MSTRG. 30016.5  | 1.92385   | coding    |
| MSTRG. 30016.4  | 1.46893   | coding    |
| MSTRG. 30018.1  | -2.30532  | noncoding |
| MSTRG. 30020.2  | 0.650388  | coding    |
| MSTRG. 30020.3  | 0.657175  | coding    |
| MSTRG. 30013.1  | -0.160792 | noncoding |
| MSTRG. 30014.1  | -0.616457 | noncoding |
| MSTRG. 30014.2  | -1.11547  | noncoding |
| MSTRG. 30014.3  | -1.10189  | noncoding |
| MSTRG. 30014.4  | -0.615328 | noncoding |
| MSTRG. 30024.3  | -0.438911 | noncoding |
| MSTRG. 30033.1  | -2.18243  | noncoding |
| MSTRG. 30035.2  | 0.848952  | coding    |
| MSTRG. 30036.2  | 1.10563   | coding    |
| MSTRG. 30036.3  | 0.86897   | coding    |
| MSTRG. 30036.4  | 1.30057   | coding    |
| MSTRG. 30054.11 | 1.27384   | coding    |
| MSTRG. 30054.13 | 1.26126   | coding    |
| MSTRG. 30054.2  | 1.04619   | coding    |
| MSTRG. 30054.7  | 1.08942   | coding    |
| MSTRG. 30054.8  | 1.93286   | coding    |
| MSTRG. 30054.17 | 0.994804  | coding    |
| MSTRG. 30054.19 | 0.637969  | coding    |
| MSTRG. 30054.21 | 1.03749   | coding    |
| MSTRG. 30054.20 | 0.148977  | coding    |
| MSTRG. 30054.18 | 0.372328  | coding    |
| MSTRG. 30040.2  | 1.45167   | coding    |
| MSTRG. 30040.3  | 0.274915  | coding    |
| MSTRG. 30039.1  | 0.949124  | coding    |
| MSTRG. 30046.1  | -1.39934  | noncoding |
| MSTRG. 30046.2  | -0.885277 | noncoding |
| MSTRG. 30049.3  | 1.17576   | coding    |
| MSTRG. 30049.2  | 1.00821   | coding    |
| MSTRG. 30055.1  | -0.439028 | noncoding |
| MSTRG. 30064.5  | -1.37193  | noncoding |

|                 |            |           |
|-----------------|------------|-----------|
| MSTRG. 30064. 6 | -1. 09175  | noncoding |
| MSTRG. 30068. 1 | -2. 22179  | noncoding |
| MSTRG. 30068. 2 | -1. 81067  | noncoding |
| MSTRG. 30087. 1 | -1. 91924  | noncoding |
| MSTRG. 30091. 1 | -1. 75317  | noncoding |
| MSTRG. 30114. 1 | 0. 872843  | coding    |
| MSTRG. 30114. 3 | 1. 06433   | coding    |
| MSTRG. 30102. 1 | 0. 200173  | coding    |
| MSTRG. 30102. 2 | 1. 49867   | coding    |
| MSTRG. 30102. 3 | -1. 89986  | noncoding |
| MSTRG. 30126. 5 | 0. 50175   | coding    |
| MSTRG. 30127. 1 | -1. 44596  | noncoding |
| MSTRG. 30128. 1 | 0. 27889   | coding    |
| MSTRG. 30129. 1 | 0. 83081   | coding    |
| MSTRG. 30130. 1 | 0. 786254  | coding    |
| MSTRG. 30132. 1 | -1. 00315  | noncoding |
| MSTRG. 30121. 2 | 1. 25223   | coding    |
| MSTRG. 30122. 3 | -2. 031    | noncoding |
| MSTRG. 30124. 1 | -1. 98279  | noncoding |
| MSTRG. 30123. 2 | 0. 85532   | coding    |
| MSTRG. 30138. 1 | 0. 837044  | coding    |
| MSTRG. 30143. 1 | -1. 98359  | noncoding |
| MSTRG. 30133. 1 | -1. 72823  | noncoding |
| MSTRG. 30137. 1 | 0. 238013  | coding    |
| MSTRG. 30165. 3 | -2. 08926  | noncoding |
| MSTRG. 30164. 1 | -0. 327288 | noncoding |
| MSTRG. 30164. 2 | -0. 517261 | noncoding |
| MSTRG. 30175. 1 | -0. 328867 | noncoding |
| MSTRG. 30176. 1 | 0. 185186  | coding    |
| MSTRG. 30177. 1 | 1. 98986   | coding    |
| MSTRG. 30177. 4 | 1. 10363   | coding    |
| MSTRG. 30178. 1 | -0. 168023 | noncoding |
| MSTRG. 30177. 5 | -0. 364299 | noncoding |
| MSTRG. 30177. 6 | -0. 369389 | noncoding |
| MSTRG. 30171. 6 | 1. 09352   | coding    |
| MSTRG. 30174. 1 | -0. 576641 | noncoding |
| MSTRG. 30182. 1 | 0. 602725  | coding    |
| MSTRG. 30186. 3 | 0. 581612  | coding    |
| MSTRG. 30190. 2 | 3. 04973   | coding    |
| MSTRG. 30198. 1 | 2. 57657   | coding    |
| MSTRG. 30198. 3 | 0. 412969  | coding    |
| MSTRG. 30198. 4 | 0. 659983  | coding    |
| MSTRG. 30199. 2 | 1. 10538   | coding    |
| MSTRG. 30199. 3 | 1. 16594   | coding    |
| MSTRG. 30204. 1 | 0. 311536  | coding    |
| MSTRG. 30204. 2 | 0. 413955  | coding    |
| MSTRG. 30189. 2 | 0. 527777  | coding    |
| MSTRG. 30211. 1 | -1. 37309  | noncoding |
| MSTRG. 30212. 3 | 1. 77675   | coding    |
| MSTRG. 30212. 4 | 2. 00459   | coding    |
| MSTRG. 30213. 1 | -0. 522506 | noncoding |
| MSTRG. 30214. 1 | 0. 39272   | coding    |
| MSTRG. 30215. 2 | 3. 1938    | coding    |
| MSTRG. 30215. 4 | 0. 562327  | coding    |

|                  |            |           |
|------------------|------------|-----------|
| MSTRG. 30216. 1  | -2. 16556  | noncoding |
| MSTRG. 30217. 2  | 1. 55784   | coding    |
| MSTRG. 30219. 1  | 1. 46271   | coding    |
| MSTRG. 30227. 1  | -2. 00391  | noncoding |
| MSTRG. 30227. 2  | -1. 57803  | noncoding |
| MSTRG. 30240. 2  | 2. 08476   | coding    |
| MSTRG. 30241. 1  | 0. 179831  | coding    |
| MSTRG. 30245. 1  | -0. 050975 | noncoding |
| MSTRG. 30235. 1  | 1. 09664   | coding    |
| MSTRG. 30239. 1  | -0. 708241 | noncoding |
| MSTRG. 30248. 3  | 1. 15394   | coding    |
| MSTRG. 30248. 2  | 1. 27649   | coding    |
| MSTRG. 30248. 4  | -1. 92445  | noncoding |
| MSTRG. 30248. 5  | -2. 07414  | noncoding |
| MSTRG. 30248. 7  | 1. 09887   | coding    |
| MSTRG. 30248. 9  | 1. 19672   | coding    |
| MSTRG. 30248. 8  | 1. 02753   | coding    |
| MSTRG. 30249. 2  | 1. 09438   | coding    |
| MSTRG. 30258. 2  | 2. 16111   | coding    |
| MSTRG. 30258. 3  | 1. 38673   | coding    |
| MSTRG. 30258. 4  | 1. 95548   | coding    |
| MSTRG. 30260. 1  | 0. 802652  | coding    |
| MSTRG. 30258. 5  | 2. 17963   | coding    |
| MSTRG. 30252. 5  | 1. 80818   | coding    |
| MSTRG. 30271. 2  | 1. 26277   | coding    |
| MSTRG. 30271. 3  | 3. 25812   | coding    |
| MSTRG. 30272. 1  | -2. 56596  | noncoding |
| MSTRG. 30275. 2  | 0. 648332  | coding    |
| MSTRG. 30275. 6  | 1. 34638   | coding    |
| MSTRG. 30275. 7  | 1. 11014   | coding    |
| MSTRG. 30275. 8  | 0. 185196  | coding    |
| MSTRG. 30275. 9  | 1. 24914   | coding    |
| MSTRG. 30275. 12 | -0. 519768 | noncoding |
| MSTRG. 30278. 1  | -0. 035955 | noncoding |
| MSTRG. 30264. 3  | 1. 18413   | coding    |
| MSTRG. 30265. 1  | 0. 546347  | coding    |
| MSTRG. 30281. 1  | 2. 07287   | coding    |
| MSTRG. 30281. 2  | 1. 99085   | coding    |
| MSTRG. 30282. 2  | 2. 10251   | coding    |
| MSTRG. 30282. 3  | 2. 09962   | coding    |
| MSTRG. 30287. 2  | -0. 021592 | noncoding |
| MSTRG. 30287. 4  | 0. 212983  | coding    |
| MSTRG. 30288. 2  | -1. 11836  | noncoding |
| MSTRG. 30290. 1  | 0. 042764  | coding    |
| MSTRG. 30291. 5  | -0. 373594 | noncoding |
| MSTRG. 30291. 4  | -0. 209463 | noncoding |
| MSTRG. 30291. 6  | -0. 314043 | noncoding |
| MSTRG. 30283. 1  | -2. 01607  | noncoding |
| MSTRG. 30302. 5  | 1. 22864   | coding    |
| MSTRG. 30315. 3  | 0. 428163  | coding    |
| MSTRG. 30315. 2  | 0. 761966  | coding    |
| MSTRG. 30315. 4  | 0. 510594  | coding    |
| MSTRG. 30315. 5  | 0. 439341  | coding    |
| MSTRG. 30320. 1  | 1. 83556   | coding    |

|                 |           |           |
|-----------------|-----------|-----------|
| MSTRG. 30321.3  | 0.6758    | coding    |
| MSTRG. 30321.4  | 1.1177    | coding    |
| MSTRG. 30321.5  | 1.14076   | coding    |
| MSTRG. 30321.6  | 1.34662   | coding    |
| MSTRG. 30321.7  | 0.707358  | coding    |
| MSTRG. 30312.1  | -1.86608  | noncoding |
| MSTRG. 30313.1  | -0.402677 | noncoding |
| MSTRG. 30325.2  | 2.70125   | coding    |
| MSTRG. 30326.1  | -0.515074 | noncoding |
| MSTRG. 30326.2  | -1.38346  | noncoding |
| MSTRG. 30322.3  | 0.519013  | coding    |
| MSTRG. 30329.2  | 1.29572   | coding    |
| MSTRG. 30331.2  | 1.40582   | coding    |
| MSTRG. 30332.2  | -0.054139 | noncoding |
| MSTRG. 30332.3  | 0.141473  | coding    |
| MSTRG. 30343.1  | 1.6214    | coding    |
| MSTRG. 30343.6  | 0.520937  | coding    |
| MSTRG. 30343.4  | 2.06115   | coding    |
| MSTRG. 30344.1  | 1.66171   | coding    |
| MSTRG. 30345.1  | -0.46191  | noncoding |
| MSTRG. 30348.1  | -1.79772  | noncoding |
| MSTRG. 30350.5  | 0.069387  | coding    |
| MSTRG. 30354.2  | 2.00235   | coding    |
| MSTRG. 30357.2  | 1.75043   | coding    |
| MSTRG. 30359.5  | -0.16525  | noncoding |
| MSTRG. 30359.6  | 1.99204   | coding    |
| MSTRG. 30361.7  | 1.82925   | coding    |
| MSTRG. 30361.2  | 1.73441   | coding    |
| MSTRG. 30361.9  | 1.6065    | coding    |
| MSTRG. 30361.11 | 2.35736   | coding    |
| MSTRG. 30361.5  | 0.876195  | coding    |
| MSTRG. 30361.4  | 1.48715   | coding    |
| MSTRG. 30361.14 | 2.38367   | coding    |
| MSTRG. 30361.15 | 1.67324   | coding    |
| MSTRG. 30361.12 | 1.73259   | coding    |
| MSTRG. 30361.6  | 2.24572   | coding    |
| MSTRG. 30361.16 | 0.334135  | coding    |
| MSTRG. 30362.5  | 1.08656   | coding    |
| MSTRG. 30363.8  | 2.48637   | coding    |
| MSTRG. 30363.3  | 2.59484   | coding    |
| MSTRG. 30363.5  | 2.55542   | coding    |
| MSTRG. 30363.6  | 2.56271   | coding    |
| MSTRG. 30363.2  | 2.59078   | coding    |
| MSTRG. 30363.4  | 2.54535   | coding    |
| MSTRG. 30363.7  | 2.55283   | coding    |
| MSTRG. 30365.1  | 1.05004   | coding    |
| MSTRG. 30367.1  | 0.151898  | coding    |
| MSTRG. 30367.4  | 0.479981  | coding    |
| MSTRG. 30368.7  | 1.57586   | coding    |
| MSTRG. 30368.4  | 1.83323   | coding    |
| MSTRG. 30368.9  | 1.76825   | coding    |
| MSTRG. 30368.10 | 1.62863   | coding    |
| MSTRG. 30375.1  | 0.777241  | coding    |
| MSTRG. 30375.5  | 1.53686   | coding    |



|                 |           |           |
|-----------------|-----------|-----------|
| MSTRG. 30375.6  | 1.57633   | coding    |
| MSTRG. 30375.9  | 1.29937   | coding    |
| MSTRG. 30375.7  | 1.54707   | coding    |
| MSTRG. 30375.8  | 1.29188   | coding    |
| MSTRG. 30375.12 | 1.54796   | coding    |
| MSTRG. 30375.11 | 0.487884  | coding    |
| MSTRG. 30375.14 | 1.6395    | coding    |
| MSTRG. 30375.15 | 1.66848   | coding    |
| MSTRG. 30378.1  | 1.09949   | coding    |
| MSTRG. 30371.1  | -0.38882  | noncoding |
| MSTRG. 30371.2  | -1.1225   | noncoding |
| MSTRG. 30372.1  | -2.0986   | noncoding |
| MSTRG. 30382.2  | -0.763635 | noncoding |
| MSTRG. 30386.3  | 2.04123   | coding    |
| MSTRG. 30388.1  | -2.19737  | noncoding |
| MSTRG. 30386.5  | 1.89988   | coding    |
| MSTRG. 30386.6  | 1.90811   | coding    |
| MSTRG. 30386.8  | 1.57286   | coding    |
| MSTRG. 30393.2  | 1.5911    | coding    |
| MSTRG. 30393.8  | 2.14701   | coding    |
| MSTRG. 30393.5  | 1.81741   | coding    |
| MSTRG. 30393.9  | 1.71098   | coding    |
| MSTRG. 30393.7  | 1.98371   | coding    |
| MSTRG. 30393.3  | 2.25011   | coding    |
| MSTRG. 30394.1  | -0.005256 | noncoding |
| MSTRG. 30395.1  | 0.593568  | coding    |
| MSTRG. 30398.2  | -0.171524 | noncoding |
| MSTRG. 30398.3  | -0.266415 | noncoding |
| MSTRG. 30399.3  | 1.9819    | coding    |
| MSTRG. 30403.3  | 1.42202   | coding    |
| MSTRG. 30403.4  | 1.49133   | coding    |
| MSTRG. 30403.5  | 1.89218   | coding    |
| MSTRG. 30403.6  | 1.505     | coding    |
| MSTRG. 30404.1  | -1.88257  | noncoding |
| MSTRG. 30416.1  | -0.969776 | noncoding |
| MSTRG. 30419.5  | 1.36027   | coding    |
| MSTRG. 30409.1  | -0.306601 | noncoding |
| MSTRG. 30409.2  | -0.762475 | noncoding |
| MSTRG. 30410.1  | -2.04426  | noncoding |
| MSTRG. 30411.3  | -0.421042 | noncoding |
| MSTRG. 30411.4  | -0.3529   | noncoding |
| MSTRG. 30411.2  | -0.247355 | noncoding |
| MSTRG. 30411.6  | 0.303594  | coding    |
| MSTRG. 30411.5  | -0.2606   | noncoding |
| MSTRG. 30408.1  | -2.05082  | noncoding |
| MSTRG. 30436.1  | -1.62342  | noncoding |
| MSTRG. 30437.1  | -1.31984  | noncoding |
| MSTRG. 30438.1  | 2.51861   | coding    |
| MSTRG. 30439.1  | 0.005143  | coding    |
| MSTRG. 30442.1  | 0.322451  | coding    |
| MSTRG. 30442.2  | -0.310277 | noncoding |
| MSTRG. 30442.3  | -0.719954 | noncoding |
| MSTRG. 30444.2  | 1.8497    | coding    |
| MSTRG. 30445.2  | 0.82828   | coding    |

|                  |           |           |
|------------------|-----------|-----------|
| MSTRG. 30448. 1  | -0.446951 | noncoding |
| MSTRG. 30451. 1  | 0.122607  | coding    |
| MSTRG. 30453. 3  | 2.51586   | coding    |
| MSTRG. 30453. 4  | 2.30994   | coding    |
| MSTRG. 30453. 5  | 1.98799   | coding    |
| MSTRG. 30456. 2  | -0.145654 | noncoding |
| MSTRG. 30456. 1  | 0.348287  | coding    |
| MSTRG. 30456. 7  | -0.033583 | noncoding |
| MSTRG. 30456. 4  | -0.037841 | noncoding |
| MSTRG. 30438. 2  | -2.36714  | noncoding |
| MSTRG. 30426. 1  | -1.62765  | noncoding |
| MSTRG. 30467. 1  | -3.11871  | noncoding |
| MSTRG. 30469. 1  | -1.22948  | noncoding |
| MSTRG. 30483. 1  | -1.46825  | noncoding |
| MSTRG. 30496. 1  | 0.691734  | coding    |
| MSTRG. 30496. 2  | 0.799929  | coding    |
| MSTRG. 30497. 1  | -0.271526 | noncoding |
| MSTRG. 30497. 2  | 1.16962   | coding    |
| MSTRG. 30496. 3  | -0.07953  | noncoding |
| MSTRG. 30473. 1  | -2.98167  | noncoding |
| MSTRG. 30475. 10 | 0.760603  | coding    |
| MSTRG. 30475. 11 | 0.63698   | coding    |
| MSTRG. 30476. 1  | -2.09181  | noncoding |
| MSTRG. 30479. 1  | -0.808394 | noncoding |
| MSTRG. 30481. 1  | 0.891201  | coding    |
| MSTRG. 30481. 2  | 0.701201  | coding    |
| MSTRG. 30481. 3  | 0.273733  | coding    |
| MSTRG. 30477. 2  | 0.425475  | coding    |
| MSTRG. 30503. 1  | 1.19498   | coding    |
| MSTRG. 30505. 4  | 0.403377  | coding    |
| MSTRG. 30506. 1  | 0.198023  | coding    |
| MSTRG. 30506. 4  | 0.073358  | coding    |
| MSTRG. 30507. 2  | 1.41917   | coding    |
| MSTRG. 30518. 1  | 1.00668   | coding    |
| MSTRG. 30518. 2  | 0.871017  | coding    |
| MSTRG. 30518. 6  | 0.918064  | coding    |
| MSTRG. 30517. 2  | 0.581283  | coding    |
| MSTRG. 30522. 5  | -0.561263 | noncoding |
| MSTRG. 30522. 6  | 0.38446   | coding    |
| MSTRG. 30523. 1  | 0.289575  | coding    |
| MSTRG. 30524. 1  | 0.779276  | coding    |
| MSTRG. 30525. 1  | 1.99549   | coding    |
| MSTRG. 30529. 1  | 1.919     | coding    |
| MSTRG. 30530. 1  | 0.42087   | coding    |
| MSTRG. 30530. 2  | 0.49359   | coding    |
| MSTRG. 30530. 3  | 0.085237  | coding    |
| MSTRG. 30531. 3  | 1.39283   | coding    |
| MSTRG. 30536. 1  | -1.95573  | noncoding |
| MSTRG. 30539. 1  | -1.21702  | noncoding |
| MSTRG. 30534. 2  | 1.61476   | coding    |
| MSTRG. 30534. 3  | 2.27839   | coding    |
| MSTRG. 30534. 4  | 0.513045  | coding    |
| MSTRG. 30547. 1  | 1.5761    | coding    |
| MSTRG. 30547. 2  | 2.56072   | coding    |

|                 |           |           |
|-----------------|-----------|-----------|
| MSTRG. 30547.6  | 2.9772    | coding    |
| MSTRG. 30547.5  | 2.95402   | coding    |
| MSTRG. 30547.7  | 1.80743   | coding    |
| MSTRG. 30548.1  | -0.133023 | noncoding |
| MSTRG. 30548.2  | 0.101301  | coding    |
| MSTRG. 30548.3  | -2.02311  | noncoding |
| MSTRG. 30549.1  | -0.442471 | noncoding |
| MSTRG. 30550.1  | 0.289519  | coding    |
| MSTRG. 30551.1  | -1.15245  | noncoding |
| MSTRG. 30553.1  | -0.724887 | noncoding |
| MSTRG. 30554.1  | -1.39443  | noncoding |
| MSTRG. 30555.1  | 0.192871  | coding    |
| MSTRG. 30556.1  | 2.92499   | coding    |
| MSTRG. 30556.2  | 2.32701   | coding    |
| MSTRG. 30545.1  | -2.60215  | noncoding |
| MSTRG. 30559.1  | 0.503331  | coding    |
| MSTRG. 30559.3  | 0.423082  | coding    |
| MSTRG. 30561.2  | 1.79386   | coding    |
| MSTRG. 30561.3  | 1.41178   | coding    |
| MSTRG. 30562.2  | 2.22045   | coding    |
| MSTRG. 30565.1  | 1.35463   | coding    |
| MSTRG. 30565.2  | 2.28779   | coding    |
| MSTRG. 30565.4  | 1.96332   | coding    |
| MSTRG. 30566.1  | -1.07782  | noncoding |
| MSTRG. 30569.1  | -0.688263 | noncoding |
| MSTRG. 30571.1  | -2.7147   | noncoding |
| MSTRG. 30572.1  | -0.88529  | noncoding |
| MSTRG. 30575.1  | 0.848479  | coding    |
| MSTRG. 30575.2  | 1.19915   | coding    |
| MSTRG. 30575.3  | 0.526295  | coding    |
| MSTRG. 30575.5  | 1.04263   | coding    |
| MSTRG. 30576.1  | -1.92396  | noncoding |
| MSTRG. 30583.2  | 2.36092   | coding    |
| MSTRG. 30583.3  | 1.99121   | coding    |
| MSTRG. 30583.4  | 1.98209   | coding    |
| MSTRG. 30584.1  | 0.145343  | coding    |
| MSTRG. 30595.3  | 1.41842   | coding    |
| MSTRG. 30595.5  | 0.829563  | coding    |
| MSTRG. 30595.4  | 0.955058  | coding    |
| MSTRG. 30596.1  | 2.04186   | coding    |
| MSTRG. 30597.1  | 2.06697   | coding    |
| MSTRG. 30597.3  | 2.67151   | coding    |
| MSTRG. 30597.5  | 2.47312   | coding    |
| MSTRG. 30599.4  | 1.25297   | coding    |
| MSTRG. 30614.8  | 1.55178   | coding    |
| MSTRG. 30616.7  | 2.22486   | coding    |
| MSTRG. 30616.3  | 2.55134   | coding    |
| MSTRG. 30616.6  | 2.70141   | coding    |
| MSTRG. 30617.1  | 0.265593  | coding    |
| MSTRG. 30616.8  | 1.41395   | coding    |
| MSTRG. 30616.9  | 0.988143  | coding    |
| MSTRG. 30616.10 | 0.687862  | coding    |
| MSTRG. 30618.1  | -1.77346  | noncoding |
| MSTRG. 30620.1  | 1.59601   | coding    |

|                  |            |           |
|------------------|------------|-----------|
| MSTRG. 30620. 3  | 0. 38786   | coding    |
| MSTRG. 30623. 4  | 1. 61743   | coding    |
| MSTRG. 30623. 5  | 1. 30428   | coding    |
| MSTRG. 30624. 1  | -2. 21494  | noncoding |
| MSTRG. 30625. 1  | 1. 01058   | coding    |
| MSTRG. 30625. 2  | 0. 998554  | coding    |
| MSTRG. 30625. 3  | 0. 980835  | coding    |
| MSTRG. 30625. 4  | 0. 897098  | coding    |
| MSTRG. 30625. 5  | 1. 02677   | coding    |
| MSTRG. 30625. 6  | 0. 987662  | coding    |
| MSTRG. 30628. 1  | -1. 63636  | noncoding |
| MSTRG. 30631. 2  | 0. 300907  | coding    |
| MSTRG. 30643. 1  | 0. 684727  | coding    |
| MSTRG. 30645. 3  | 0. 249113  | coding    |
| MSTRG. 30646. 1  | 1. 33704   | coding    |
| MSTRG. 30646. 2  | 0. 99097   | coding    |
| MSTRG. 30637. 1  | -0. 176176 | noncoding |
| MSTRG. 30654. 4  | 0. 446158  | coding    |
| MSTRG. 30657. 1  | -1. 13196  | noncoding |
| MSTRG. 30658. 2  | 1. 09726   | coding    |
| MSTRG. 30658. 3  | 1. 04034   | coding    |
| MSTRG. 30658. 4  | 1. 49604   | coding    |
| MSTRG. 30669. 1  | -0. 672571 | noncoding |
| MSTRG. 30668. 5  | 0. 032454  | coding    |
| MSTRG. 30668. 3  | 1. 4423    | coding    |
| MSTRG. 30668. 4  | 1. 41811   | coding    |
| MSTRG. 30668. 6  | 1. 67565   | coding    |
| MSTRG. 30670. 1  | -1. 23799  | noncoding |
| MSTRG. 30671. 10 | 0. 165512  | coding    |
| MSTRG. 30676. 4  | 1. 75785   | coding    |
| MSTRG. 30678. 1  | 1. 79227   | coding    |
| MSTRG. 30685. 1  | 0. 812106  | coding    |
| MSTRG. 30685. 4  | 0. 790615  | coding    |
| MSTRG. 30685. 5  | 0. 353712  | coding    |
| MSTRG. 30685. 6  | 0. 33562   | coding    |
| MSTRG. 30685. 7  | 0. 62582   | coding    |
| MSTRG. 30685. 8  | 0. 662951  | coding    |
| MSTRG. 30685. 9  | 0. 686393  | coding    |
| MSTRG. 30685. 10 | 1. 04922   | coding    |
| MSTRG. 30685. 11 | -0. 859945 | noncoding |
| MSTRG. 30685. 12 | 0. 424619  | coding    |
| MSTRG. 30685. 13 | -0. 248634 | noncoding |
| MSTRG. 30685. 14 | -0. 1022   | noncoding |
| MSTRG. 30685. 15 | 0. 342564  | coding    |
| MSTRG. 30688. 1  | -0. 744871 | noncoding |
| MSTRG. 30688. 2  | 0. 13518   | coding    |
| MSTRG. 30693. 1  | 1. 33788   | coding    |
| MSTRG. 30693. 6  | 1. 04356   | coding    |
| MSTRG. 30693. 2  | 1. 24533   | coding    |
| MSTRG. 30693. 3  | 1. 23894   | coding    |
| MSTRG. 30693. 4  | 1. 24019   | coding    |
| MSTRG. 30693. 7  | 1. 36118   | coding    |
| MSTRG. 30693. 9  | 1. 1369    | coding    |
| MSTRG. 30695. 1  | -1. 20119  | noncoding |

|                 |           |           |
|-----------------|-----------|-----------|
| MSTRG. 30698.1  | -1.06114  | noncoding |
| MSTRG. 30698.2  | -1.89151  | noncoding |
| MSTRG. 30699.1  | -0.190424 | noncoding |
| MSTRG. 30701.1  | -0.865521 | noncoding |
| MSTRG. 30703.1  | -0.878562 | noncoding |
| MSTRG. 30703.2  | -1.89844  | noncoding |
| MSTRG. 30704.1  | -0.768835 | noncoding |
| MSTRG. 30705.2  | -0.715928 | noncoding |
| MSTRG. 30706.1  | 0.153998  | coding    |
| MSTRG. 30712.1  | -1.15033  | noncoding |
| MSTRG. 30712.2  | -1.02833  | noncoding |
| MSTRG. 30716.1  | 2.04278   | coding    |
| MSTRG. 30718.1  | -0.009419 | noncoding |
| MSTRG. 30718.2  | 0.038007  | coding    |
| MSTRG. 30719.1  | -0.190819 | noncoding |
| MSTRG. 30720.5  | -0.533276 | noncoding |
| MSTRG. 30720.4  | 0.954017  | coding    |
| MSTRG. 30720.3  | 1.18121   | coding    |
| MSTRG. 30720.2  | 1.04074   | coding    |
| MSTRG. 30736.1  | 2.66352   | coding    |
| MSTRG. 30736.3  | 2.95048   | coding    |
| MSTRG. 30736.4  | 2.94377   | coding    |
| MSTRG. 30737.1  | -2.2666   | noncoding |
| MSTRG. 30725.2  | 1.09056   | coding    |
| MSTRG. 30727.1  | -1.76459  | noncoding |
| MSTRG. 30728.1  | -0.32978  | noncoding |
| MSTRG. 30740.1  | 0.559362  | coding    |
| MSTRG. 30741.1  | -1.41141  | noncoding |
| MSTRG. 30743.6  | -0.343594 | noncoding |
| MSTRG. 30743.4  | 0.040396  | coding    |
| MSTRG. 30743.8  | -0.162107 | noncoding |
| MSTRG. 30743.9  | -1.28937  | noncoding |
| MSTRG. 30743.10 | 0.060195  | coding    |
| MSTRG. 30743.7  | 0.101452  | coding    |
| MSTRG. 30747.5  | 0.83111   | coding    |
| MSTRG. 30747.6  | 0.400222  | coding    |
| MSTRG. 30758.2  | 1.09785   | coding    |
| MSTRG. 30759.1  | -2.18083  | noncoding |
| MSTRG. 30760.1  | -0.013104 | noncoding |
| MSTRG. 30760.3  | -0.076462 | noncoding |
| MSTRG. 30760.4  | 0.005978  | coding    |
| MSTRG. 30760.5  | 1.51047   | coding    |
| MSTRG. 30760.2  | 1.69735   | coding    |
| MSTRG. 30762.1  | -0.553618 | noncoding |
| MSTRG. 30763.1  | 0.580193  | coding    |
| MSTRG. 30760.7  | -0.714969 | noncoding |
| MSTRG. 30760.8  | -1.63604  | noncoding |
| MSTRG. 30765.1  | -1.55031  | noncoding |
| MSTRG. 30768.1  | -2.31856  | noncoding |
| MSTRG. 30771.1  | 0.270956  | coding    |
| MSTRG. 30772.1  | 0.622831  | coding    |
| MSTRG. 30772.2  | 0.800151  | coding    |
| MSTRG. 30753.7  | 1.16284   | coding    |
| MSTRG. 30757.1  | -0.840348 | noncoding |

|                 |            |           |
|-----------------|------------|-----------|
| MSTRG. 30774. 1 | 1. 68948   | coding    |
| MSTRG. 30776. 1 | -1. 7336   | noncoding |
| MSTRG. 30787. 1 | 0. 278813  | coding    |
| MSTRG. 30791. 1 | -2. 14407  | noncoding |
| MSTRG. 30792. 2 | -1. 84208  | noncoding |
| MSTRG. 30793. 1 | -0. 926195 | noncoding |
| MSTRG. 30792. 3 | -0. 856648 | noncoding |
| MSTRG. 30792. 4 | -0. 877109 | noncoding |
| MSTRG. 30792. 5 | -2. 11184  | noncoding |
| MSTRG. 30792. 6 | -2. 47034  | noncoding |
| MSTRG. 30794. 1 | -2. 40455  | noncoding |
| MSTRG. 30795. 4 | 0. 270064  | coding    |
| MSTRG. 30831. 1 | -0. 52046  | noncoding |
| MSTRG. 30832. 2 | -2. 21872  | noncoding |
| MSTRG. 30798. 1 | -0. 061196 | noncoding |
| MSTRG. 30801. 1 | -1. 13705  | noncoding |
| MSTRG. 30802. 1 | -2. 3935   | noncoding |
| MSTRG. 30803. 2 | -0. 227281 | noncoding |
| MSTRG. 30805. 2 | 2. 07083   | coding    |
| MSTRG. 30805. 4 | 2. 93971   | coding    |
| MSTRG. 30806. 1 | 0. 358029  | coding    |
| MSTRG. 30807. 1 | 0. 554454  | coding    |
| MSTRG. 30808. 1 | 0. 257068  | coding    |
| MSTRG. 30808. 2 | -1. 01091  | noncoding |
| MSTRG. 30805. 6 | 1. 03285   | coding    |
| MSTRG. 30809. 1 | 1. 11595   | coding    |
| MSTRG. 30812. 1 | 2. 24636   | coding    |
| MSTRG. 30812. 2 | 2. 4185    | coding    |
| MSTRG. 30812. 4 | 2. 54913   | coding    |
| MSTRG. 30815. 2 | -2. 10566  | noncoding |
| MSTRG. 30817. 1 | 0. 053363  | coding    |
| MSTRG. 30826. 2 | 1. 35096   | coding    |
| MSTRG. 30826. 3 | 1. 41323   | coding    |
| MSTRG. 30826. 5 | 0. 03485   | coding    |
| MSTRG. 30826. 6 | 0. 752813  | coding    |
| MSTRG. 30833. 1 | -1. 70286  | noncoding |
| MSTRG. 30866. 1 | 0. 043043  | coding    |
| MSTRG. 30867. 1 | 0. 90157   | coding    |
| MSTRG. 30866. 2 | -0. 588201 | noncoding |
| MSTRG. 30868. 1 | -1. 28708  | noncoding |
| MSTRG. 30866. 3 | -0. 109508 | noncoding |
| MSTRG. 30866. 4 | -0. 084638 | noncoding |
| MSTRG. 30866. 5 | -0. 075772 | noncoding |
| MSTRG. 30866. 6 | -0. 586906 | noncoding |
| MSTRG. 30866. 7 | -0. 165847 | noncoding |
| MSTRG. 30866. 8 | 0. 383241  | coding    |
| MSTRG. 30835. 1 | 1. 35824   | coding    |
| MSTRG. 30836. 1 | -0. 886828 | noncoding |
| MSTRG. 30836. 4 | -0. 887995 | noncoding |
| MSTRG. 30836. 3 | -1. 13382  | noncoding |
| MSTRG. 30836. 2 | -0. 732889 | noncoding |
| MSTRG. 30836. 5 | -1. 27196  | noncoding |
| MSTRG. 30836. 6 | -1. 27159  | noncoding |
| MSTRG. 30837. 1 | -0. 824375 | noncoding |

|                 |           |           |
|-----------------|-----------|-----------|
| MSTRG. 30889.5  | 1.47906   | coding    |
| MSTRG. 30889.7  | 2.70828   | coding    |
| MSTRG. 30889.10 | -0.486241 | noncoding |
| MSTRG. 30889.14 | -0.632885 | noncoding |
| MSTRG. 30892.1  | -1.1906   | noncoding |
| MSTRG. 30892.2  | -1.08427  | noncoding |
| MSTRG. 30892.3  | -1.50496  | noncoding |
| MSTRG. 30892.4  | 0.122737  | coding    |
| MSTRG. 30893.1  | 0.084768  | coding    |
| MSTRG. 30894.1  | 0.200607  | coding    |
| MSTRG. 30889.16 | -0.36     | noncoding |
| MSTRG. 30889.17 | 0.255605  | coding    |
| MSTRG. 30895.1  | -1.12754  | noncoding |
| MSTRG. 30889.19 | 0.206346  | coding    |
| MSTRG. 30889.18 | 0.410014  | coding    |
| MSTRG. 30896.1  | -0.328147 | noncoding |
| MSTRG. 30889.20 | 0.134892  | coding    |
| MSTRG. 30897.1  | 0.187321  | coding    |
| MSTRG. 30889.21 | 2.95551   | coding    |
| MSTRG. 30871.1  | -0.438427 | noncoding |
| MSTRG. 30874.1  | 0.95282   | coding    |
| MSTRG. 30874.2  | 1.59087   | coding    |
| MSTRG. 30876.3  | -0.094409 | noncoding |
| MSTRG. 30877.4  | 2.26442   | coding    |
| MSTRG. 30877.6  | 2.04557   | coding    |
| MSTRG. 30878.2  | 1.28783   | coding    |
| MSTRG. 30878.3  | 1.0341    | coding    |
| MSTRG. 30880.2  | 0.957646  | coding    |
| MSTRG. 30883.2  | -0.542024 | noncoding |
| MSTRG. 30882.1  | -1.25301  | noncoding |
| MSTRG. 30888.2  | 0.34191   | coding    |
| MSTRG. 30899.2  | 2.01896   | coding    |
| MSTRG. 30900.4  | 0.995436  | coding    |
| MSTRG. 30900.5  | 1.00295   | coding    |
| MSTRG. 30900.6  | 1.89695   | coding    |
| MSTRG. 30900.9  | 0.940725  | coding    |
| MSTRG. 30900.7  | 2.21511   | coding    |
| MSTRG. 30900.8  | 2.19804   | coding    |
| MSTRG. 30900.10 | 2.28833   | coding    |
| MSTRG. 30905.4  | 1.62706   | coding    |
| MSTRG. 30906.1  | -2.56467  | noncoding |
| MSTRG. 30907.2  | 0.613376  | coding    |
| MSTRG. 30908.1  | 1.17963   | coding    |
| MSTRG. 30909.1  | 1.29325   | coding    |
| MSTRG. 30909.2  | 0.68049   | coding    |
| MSTRG. 30909.3  | 0.887613  | coding    |
| MSTRG. 30909.4  | 1.49585   | coding    |
| MSTRG. 30909.5  | 1.38761   | coding    |
| MSTRG. 30909.6  | 1.37052   | coding    |
| MSTRG. 30910.2  | 1.03474   | coding    |
| MSTRG. 30910.3  | 1.19206   | coding    |
| MSTRG. 30910.4  | 1.12067   | coding    |
| MSTRG. 30910.5  | 0.473554  | coding    |
| MSTRG. 30910.8  | 0.427524  | coding    |

|                  |            |           |
|------------------|------------|-----------|
| MSTRG. 30910. 9  | 0. 240631  | coding    |
| MSTRG. 30911. 3  | -1. 88678  | noncoding |
| MSTRG. 30914. 1  | -2. 03747  | noncoding |
| MSTRG. 30920. 1  | -0. 174956 | noncoding |
| MSTRG. 30937. 1  | -1. 14341  | noncoding |
| MSTRG. 30937. 2  | -0. 542677 | noncoding |
| MSTRG. 30937. 5  | 0. 715468  | coding    |
| MSTRG. 30937. 6  | 0. 249501  | coding    |
| MSTRG. 30937. 7  | 1. 04851   | coding    |
| MSTRG. 30937. 8  | 0. 485907  | coding    |
| MSTRG. 30937. 9  | 0. 174497  | coding    |
| MSTRG. 30937. 10 | 0. 625774  | coding    |
| MSTRG. 30939. 1  | 0. 264788  | coding    |
| MSTRG. 30943. 1  | -0. 239106 | noncoding |
| MSTRG. 30922. 1  | 0. 615143  | coding    |
| MSTRG. 30922. 2  | 0. 424847  | coding    |
| MSTRG. 30922. 3  | 0. 677591  | coding    |
| MSTRG. 30945. 1  | -1. 03444  | noncoding |
| MSTRG. 30948. 11 | 0. 57769   | coding    |
| MSTRG. 30948. 8  | 1. 24569   | coding    |
| MSTRG. 30948. 18 | 1. 40384   | coding    |
| MSTRG. 30948. 12 | 1. 56465   | coding    |
| MSTRG. 30948. 13 | 1. 51916   | coding    |
| MSTRG. 30948. 14 | 1. 502     | coding    |
| MSTRG. 30948. 15 | 1. 87193   | coding    |
| MSTRG. 30948. 16 | 1. 57454   | coding    |
| MSTRG. 30948. 9  | 1. 52476   | coding    |
| MSTRG. 30948. 7  | 1. 43386   | coding    |
| MSTRG. 30948. 10 | 1. 58765   | coding    |
| MSTRG. 30948. 17 | 1. 53833   | coding    |
| MSTRG. 30948. 6  | 1. 56901   | coding    |
| MSTRG. 30948. 19 | -0. 235878 | noncoding |
| MSTRG. 30949. 1  | -0. 346127 | noncoding |
| MSTRG. 30950. 2  | 2. 13819   | coding    |
| MSTRG. 30951. 1  | -2. 27939  | noncoding |
| MSTRG. 30952. 1  | -2. 52083  | noncoding |
| MSTRG. 30950. 5  | 0. 986961  | coding    |
| MSTRG. 30950. 7  | 0. 820778  | coding    |
| MSTRG. 30929. 3  | 2. 04963   | coding    |
| MSTRG. 30961. 3  | 2. 09089   | coding    |
| MSTRG. 30961. 4  | 2. 09501   | coding    |
| MSTRG. 30965. 1  | 1. 29742   | coding    |
| MSTRG. 30965. 2  | 2. 49222   | coding    |
| MSTRG. 30965. 3  | 0. 865997  | coding    |
| MSTRG. 30965. 4  | 0. 396196  | coding    |
| MSTRG. 30965. 6  | 1. 3622    | coding    |
| MSTRG. 30965. 5  | 2. 2759    | coding    |
| MSTRG. 30966. 1  | -0. 826094 | noncoding |
| MSTRG. 30965. 8  | 2. 21553   | coding    |
| MSTRG. 30965. 9  | -0. 468115 | noncoding |
| MSTRG. 30965. 10 | 0. 721027  | coding    |
| MSTRG. 30967. 1  | -1. 1477   | noncoding |
| MSTRG. 30967. 3  | -0. 823776 | noncoding |
| MSTRG. 30971. 1  | -1. 59453  | noncoding |



|                 |           |           |
|-----------------|-----------|-----------|
| MSTRG. 30971.2  | -1.63303  | noncoding |
| MSTRG. 30968.1  | -1.94512  | noncoding |
| MSTRG. 31004.1  | 0.670898  | coding    |
| MSTRG. 31004.2  | -0.005444 | noncoding |
| MSTRG. 31004.4  | -0.111334 | noncoding |
| MSTRG. 31004.5  | 0.76044   | coding    |
| MSTRG. 31006.1  | -0.744813 | noncoding |
| MSTRG. 31007.1  | 1.24376   | coding    |
| MSTRG. 31011.1  | -1.66601  | noncoding |
| MSTRG. 31011.2  | -2.06398  | noncoding |
| MSTRG. 31011.3  | -1.6082   | noncoding |
| MSTRG. 31011.4  | -1.86341  | noncoding |
| MSTRG. 31011.5  | -1.88924  | noncoding |
| MSTRG. 31015.3  | 1.33995   | coding    |
| MSTRG. 31015.4  | 0.688478  | coding    |
| MSTRG. 31015.5  | 1.65076   | coding    |
| MSTRG. 31015.6  | 0.745836  | coding    |
| MSTRG. 31021.2  | 0.696211  | coding    |
| MSTRG. 31019.1  | -1.38731  | noncoding |
| MSTRG. 31027.1  | -2.11918  | noncoding |
| MSTRG. 31029.2  | 0.070378  | coding    |
| MSTRG. 31030.1  | 1.07449   | coding    |
| MSTRG. 31035.1  | 1.14804   | coding    |
| MSTRG. 31035.4  | 0.694919  | coding    |
| MSTRG. 31035.3  | 1.23323   | coding    |
| MSTRG. 31035.5  | 0.616007  | coding    |
| MSTRG. 31035.6  | 0.40262   | coding    |
| MSTRG. 31035.7  | 1.02964   | coding    |
| MSTRG. 31035.8  | 0.897187  | coding    |
| MSTRG. 31031.1  | -0.529712 | noncoding |
| MSTRG. 31036.2  | 0.715019  | coding    |
| MSTRG. 31043.1  | 0.750924  | coding    |
| MSTRG. 31044.1  | -0.946882 | noncoding |
| MSTRG. 31045.13 | -0.20993  | noncoding |
| MSTRG. 31045.4  | 1.73055   | coding    |
| MSTRG. 31045.7  | 1.96679   | coding    |
| MSTRG. 31045.11 | 2.12949   | coding    |
| MSTRG. 31045.15 | 2.10956   | coding    |
| MSTRG. 31045.16 | 0.238077  | coding    |
| MSTRG. 31045.8  | 2.16065   | coding    |
| MSTRG. 31045.14 | 0.488042  | coding    |
| MSTRG. 31045.12 | 2.04113   | coding    |
| MSTRG. 31045.9  | 2.02507   | coding    |
| MSTRG. 31045.10 | 0.63446   | coding    |
| MSTRG. 31045.6  | 2.0183    | coding    |
| MSTRG. 31046.1  | -0.766111 | noncoding |
| MSTRG. 31047.1  | -1.18155  | noncoding |
| MSTRG. 31051.1  | -1.05474  | noncoding |
| MSTRG. 31052.1  | 0.308865  | coding    |
| MSTRG. 31053.5  | 2.06927   | coding    |
| MSTRG. 31058.1  | 1.12494   | coding    |
| MSTRG. 31071.1  | -0.572055 | noncoding |
| MSTRG. 31071.2  | -1.60441  | noncoding |
| MSTRG. 31083.2  | 2.20002   | coding    |

|                |           |           |
|----------------|-----------|-----------|
| MSTRG. 31105.3 | 1.50124   | coding    |
| MSTRG. 31105.4 | 1.37202   | coding    |
| MSTRG. 31111.2 | 0.764833  | coding    |
| MSTRG. 31112.1 | 0.855303  | coding    |
| MSTRG. 31116.2 | 0.139923  | coding    |
| MSTRG. 31116.3 | 1.66183   | coding    |
| MSTRG. 31116.4 | 2.16829   | coding    |
| MSTRG. 31116.5 | 1.97076   | coding    |
| MSTRG. 31117.1 | -2.0504   | noncoding |
| MSTRG. 31117.2 | -1.85863  | noncoding |
| MSTRG. 31116.6 | 1.19932   | coding    |
| MSTRG. 31119.2 | 1.64276   | coding    |
| MSTRG. 31120.8 | 2.36884   | coding    |
| MSTRG. 31121.1 | 0.156669  | coding    |
| MSTRG. 31122.4 | 0.912188  | coding    |
| MSTRG. 31122.3 | 2.01688   | coding    |
| MSTRG. 31114.4 | 1.28679   | coding    |
| MSTRG. 31125.1 | 1.47583   | coding    |
| MSTRG. 31125.2 | 1.36838   | coding    |
| MSTRG. 31128.3 | 1.69924   | coding    |
| MSTRG. 31132.3 | 2.09648   | coding    |
| MSTRG. 31134.3 | 0.08554   | coding    |
| MSTRG. 31134.4 | -1.72328  | noncoding |
| MSTRG. 31134.5 | -1.00914  | noncoding |
| MSTRG. 31134.6 | -0.690403 | noncoding |
| MSTRG. 31133.1 | -0.985354 | noncoding |
| MSTRG. 31142.2 | 0.161569  | coding    |
| MSTRG. 31143.2 | 1.33364   | coding    |
| MSTRG. 31143.3 | 1.33143   | coding    |
| MSTRG. 31146.1 | 2.61948   | coding    |
| MSTRG. 31146.2 | -0.438816 | noncoding |
| MSTRG. 31146.4 | -0.272641 | noncoding |
| MSTRG. 31146.3 | -0.337244 | noncoding |
| MSTRG. 31146.5 | -0.388332 | noncoding |
| MSTRG. 31148.2 | 2.45526   | coding    |
| MSTRG. 31149.2 | 0.121967  | coding    |
| MSTRG. 31144.1 | 0.943055  | coding    |
| MSTRG. 31144.2 | 0.991458  | coding    |
| MSTRG. 31144.5 | -0.545691 | noncoding |
| MSTRG. 31144.6 | -0.571594 | noncoding |
| MSTRG. 31145.2 | 1.69953   | coding    |
| MSTRG. 31157.1 | -1.19546  | noncoding |
| MSTRG. 31157.2 | -1.29563  | noncoding |
| MSTRG. 31158.2 | 1.05005   | coding    |
| MSTRG. 31158.3 | 1.39874   | coding    |
| MSTRG. 31158.4 | 0.699956  | coding    |
| MSTRG. 31159.1 | -0.510268 | noncoding |
| MSTRG. 31160.2 | 0.502634  | coding    |
| MSTRG. 31160.3 | 1.40922   | coding    |
| MSTRG. 31160.4 | 0.322073  | coding    |
| MSTRG. 31161.1 | -2.40871  | noncoding |
| MSTRG. 31165.1 | 1.24035   | coding    |
| MSTRG. 31165.3 | 0.010871  | coding    |
| MSTRG. 31155.1 | -0.78653  | noncoding |

|                |           |           |
|----------------|-----------|-----------|
| MSTRG. 31155.2 | -1.51141  | noncoding |
| MSTRG. 31156.1 | 1.02877   | coding    |
| MSTRG. 31167.1 | 1.69991   | coding    |
| MSTRG. 31167.2 | -0.608208 | noncoding |
| MSTRG. 31169.5 | 2.62497   | coding    |
| MSTRG. 31169.6 | 2.72139   | coding    |
| MSTRG. 31169.7 | 1.52854   | coding    |
| MSTRG. 31171.1 | 1.37418   | coding    |
| MSTRG. 31172.3 | 2.32311   | coding    |
| MSTRG. 31175.2 | 1.30938   | coding    |
| MSTRG. 31175.3 | 0.326761  | coding    |
| MSTRG. 31174.1 | -1.39991  | noncoding |
| MSTRG. 31187.3 | 1.7714    | coding    |
| MSTRG. 31188.4 | 3.28894   | coding    |
| MSTRG. 31189.2 | 0.7501    | coding    |
| MSTRG. 31189.3 | 1.25579   | coding    |
| MSTRG. 31189.4 | 0.963569  | coding    |
| MSTRG. 31193.1 | -0.776707 | noncoding |
| MSTRG. 31194.1 | 0.196238  | coding    |
| MSTRG. 31196.2 | 0.436677  | coding    |
| MSTRG. 31196.1 | 0.846971  | coding    |
| MSTRG. 31197.1 | -0.56539  | noncoding |
| MSTRG. 31201.1 | -0.1414   | noncoding |
| MSTRG. 31202.1 | -1.41021  | noncoding |
| MSTRG. 31205.1 | -0.456914 | noncoding |
| MSTRG. 31210.1 | 0.08247   | coding    |
| MSTRG. 31211.1 | 1.07218   | coding    |
| MSTRG. 31215.1 | 0.617855  | coding    |
| MSTRG. 31215.2 | 1.92845   | coding    |
| MSTRG. 31218.2 | 0.442455  | coding    |
| MSTRG. 31219.2 | -1.11905  | noncoding |
| MSTRG. 31222.3 | 1.03931   | coding    |
| MSTRG. 31223.1 | -0.900175 | noncoding |
| MSTRG. 31231.2 | 0.080133  | coding    |
| MSTRG. 31231.3 | -0.175473 | noncoding |
| MSTRG. 31231.4 | 0.447402  | coding    |
| MSTRG. 31231.5 | -1.36601  | noncoding |
| MSTRG. 31231.6 | 1.20651   | coding    |
| MSTRG. 31233.1 | -0.579997 | noncoding |
| MSTRG. 31235.1 | -0.721979 | noncoding |
| MSTRG. 31236.1 | -0.007298 | noncoding |
| MSTRG. 31237.1 | 0.691566  | coding    |
| MSTRG. 31238.1 | 0.240054  | coding    |
| MSTRG. 31231.7 | 1.50933   | coding    |
| MSTRG. 31239.1 | 0.582205  | coding    |
| MSTRG. 31240.1 | 1.16137   | coding    |
| MSTRG. 31241.1 | 0.812045  | coding    |
| MSTRG. 31242.1 | -0.492099 | noncoding |
| MSTRG. 31240.2 | 0.847003  | coding    |
| MSTRG. 31244.1 | 0.468741  | coding    |
| MSTRG. 31244.2 | -0.077149 | noncoding |
| MSTRG. 31245.2 | -0.849711 | noncoding |
| MSTRG. 31230.1 | -2.25015  | noncoding |
| MSTRG. 31246.1 | -1.23611  | noncoding |

|                 |           |           |
|-----------------|-----------|-----------|
| MSTRG. 31246.2  | -1.37863  | noncoding |
| MSTRG. 31247.2  | 0.207074  | coding    |
| MSTRG. 31251.1  | 0.915353  | coding    |
| MSTRG. 31251.3  | -0.668557 | noncoding |
| MSTRG. 31251.2  | -0.471155 | noncoding |
| MSTRG. 31251.4  | 1.41003   | coding    |
| MSTRG. 31251.5  | -1.08021  | noncoding |
| MSTRG. 31271.1  | -0.510378 | noncoding |
| MSTRG. 31271.2  | -0.437672 | noncoding |
| MSTRG. 31263.1  | 0.041669  | coding    |
| MSTRG. 31273.1  | -0.867977 | noncoding |
| MSTRG. 31278.3  | 0.380521  | coding    |
| MSTRG. 31278.4  | 1.50285   | coding    |
| MSTRG. 31278.5  | 0.939999  | coding    |
| MSTRG. 31279.1  | -1.09866  | noncoding |
| MSTRG. 31286.4  | -2.57125  | noncoding |
| MSTRG. 31287.3  | 1.11968   | coding    |
| MSTRG. 31285.1  | 0.114856  | coding    |
| MSTRG. 31289.1  | -0.178931 | noncoding |
| MSTRG. 31291.1  | -0.774373 | noncoding |
| MSTRG. 31301.1  | 0.327212  | coding    |
| MSTRG. 31301.2  | -2.41592  | noncoding |
| MSTRG. 31301.3  | -0.601601 | noncoding |
| MSTRG. 31301.4  | -0.006274 | noncoding |
| MSTRG. 31301.5  | -0.027703 | noncoding |
| MSTRG. 31301.6  | -1.35572  | noncoding |
| MSTRG. 31301.7  | -1.91476  | noncoding |
| MSTRG. 31307.1  | -1.31376  | noncoding |
| MSTRG. 31316.2  | 0.565989  | coding    |
| MSTRG. 31317.1  | -1.04825  | noncoding |
| MSTRG. 31320.1  | -1.18626  | noncoding |
| MSTRG. 31320.3  | 0.129334  | coding    |
| MSTRG. 31320.2  | 0.144459  | coding    |
| MSTRG. 31320.7  | -0.918256 | noncoding |
| MSTRG. 31320.4  | 0.250621  | coding    |
| MSTRG. 31320.5  | 0.376267  | coding    |
| MSTRG. 31320.6  | 0.245546  | coding    |
| MSTRG. 31320.8  | -0.389686 | noncoding |
| MSTRG. 31320.9  | 0.52734   | coding    |
| MSTRG. 31320.10 | -0.022961 | noncoding |
| MSTRG. 31320.11 | -1.13369  | noncoding |
| MSTRG. 31320.12 | -0.347315 | noncoding |
| MSTRG. 31304.1  | -2.07173  | noncoding |
| MSTRG. 31324.2  | 1.80008   | coding    |
| MSTRG. 31333.2  | 1.73504   | coding    |
| MSTRG. 31336.3  | 2.50711   | coding    |
| MSTRG. 31337.1  | 1.6335    | coding    |
| MSTRG. 31341.1  | -0.528079 | noncoding |
| MSTRG. 31347.1  | 1.57338   | coding    |
| MSTRG. 31348.1  | -2.24609  | noncoding |
| MSTRG. 31350.2  | 1.22025   | coding    |
| MSTRG. 31351.3  | 2.70671   | coding    |
| MSTRG. 31363.1  | -2.0782   | noncoding |
| MSTRG. 31364.5  | 0.559824  | coding    |

|                 |           |           |
|-----------------|-----------|-----------|
| MSTRG. 31364.6  | 0.900651  | coding    |
| MSTRG. 31365.1  | 0.775475  | coding    |
| MSTRG. 31367.2  | 0.970823  | coding    |
| MSTRG. 31371.1  | -1.39909  | noncoding |
| MSTRG. 31372.2  | 2.86023   | coding    |
| MSTRG. 31374.1  | -1.26133  | noncoding |
| MSTRG. 31375.1  | -0.138724 | noncoding |
| MSTRG. 31376.1  | 0.716173  | coding    |
| MSTRG. 31378.4  | 1.4411    | coding    |
| MSTRG. 31379.1  | -1.91196  | noncoding |
| MSTRG. 31380.2  | 0.593474  | coding    |
| MSTRG. 31380.5  | 0.995886  | coding    |
| MSTRG. 31381.1  | 2.6672    | coding    |
| MSTRG. 31383.1  | -0.173579 | noncoding |
| MSTRG. 31384.2  | 1.83678   | coding    |
| MSTRG. 31385.1  | -0.312217 | noncoding |
| MSTRG. 31386.1  | -0.841895 | noncoding |
| MSTRG. 31390.1  | -2.48584  | noncoding |
| MSTRG. 31401.2  | 1.75031   | coding    |
| MSTRG. 31401.1  | 1.78182   | coding    |
| MSTRG. 31401.3  | 1.78377   | coding    |
| MSTRG. 31407.1  | 0.674995  | coding    |
| MSTRG. 31408.1  | -1.30189  | noncoding |
| MSTRG. 31407.2  | -0.95556  | noncoding |
| MSTRG. 31419.1  | 0.329381  | coding    |
| MSTRG. 31421.1  | -0.008045 | noncoding |
| MSTRG. 31426.1  | 2.49731   | coding    |
| MSTRG. 31426.2  | 2.19169   | coding    |
| MSTRG. 31431.1  | -0.725271 | noncoding |
| MSTRG. 31435.6  | 0.802237  | coding    |
| MSTRG. 31435.10 | 0.446221  | coding    |
| MSTRG. 31435.2  | 0.935241  | coding    |
| MSTRG. 31435.8  | 1.10194   | coding    |
| MSTRG. 31436.1  | -0.607259 | noncoding |
| MSTRG. 31440.1  | -1.64842  | noncoding |
| MSTRG. 31459.1  | -0.797637 | noncoding |
| MSTRG. 31474.1  | 2.11746   | coding    |
| MSTRG. 31474.2  | 1.25097   | coding    |
| MSTRG. 31476.1  | -2.06018  | noncoding |
| MSTRG. 31477.1  | 0.747064  | coding    |
| MSTRG. 31474.3  | 0.298737  | coding    |
| MSTRG. 31478.1  | 0.538907  | coding    |
| MSTRG. 31477.2  | -0.053885 | noncoding |
| MSTRG. 31479.1  | 0.271356  | coding    |
| MSTRG. 31474.4  | -0.066636 | noncoding |
| MSTRG. 31474.6  | -1.83707  | noncoding |
| MSTRG. 31474.7  | -0.017064 | noncoding |
| MSTRG. 31480.1  | -2.82982  | noncoding |
| MSTRG. 31468.2  | 2.00936   | coding    |
| MSTRG. 31468.4  | 0.128867  | coding    |
| MSTRG. 31468.5  | -0.757561 | noncoding |
| MSTRG. 31484.1  | 2.05734   | coding    |
| MSTRG. 31485.1  | 0.585255  | coding    |
| MSTRG. 31485.2  | 0.528536  | coding    |

|                 |           |           |
|-----------------|-----------|-----------|
| MSTRG. 31493.1  | 1.068     | coding    |
| MSTRG. 31493.2  | 0.84433   | coding    |
| MSTRG. 31505.1  | -0.156879 | noncoding |
| MSTRG. 31506.1  | -0.027888 | noncoding |
| MSTRG. 31505.2  | -0.267157 | noncoding |
| MSTRG. 31505.4  | 0.837667  | coding    |
| MSTRG. 31505.3  | 0.375724  | coding    |
| MSTRG. 31507.1  | 0.495618  | coding    |
| MSTRG. 31505.5  | -0.575923 | noncoding |
| MSTRG. 31495.1  | -0.608088 | noncoding |
| MSTRG. 31511.1  | 0.059806  | coding    |
| MSTRG. 31511.2  | 0.127092  | coding    |
| MSTRG. 31512.1  | 0.952915  | coding    |
| MSTRG. 31510.4  | 0.04966   | coding    |
| MSTRG. 31510.5  | 0.670359  | coding    |
| MSTRG. 31510.7  | 0.609477  | coding    |
| MSTRG. 31510.8  | 0.683551  | coding    |
| MSTRG. 31510.9  | -0.601404 | noncoding |
| MSTRG. 31513.1  | 0.632833  | coding    |
| MSTRG. 31515.1  | 0.593107  | coding    |
| MSTRG. 31517.1  | -2.2859   | noncoding |
| MSTRG. 31522.1  | -1.79544  | noncoding |
| MSTRG. 31525.1  | -0.275276 | noncoding |
| MSTRG. 31525.2  | 0.613093  | coding    |
| MSTRG. 31526.1  | -2.02646  | noncoding |
| MSTRG. 31527.1  | -0.792644 | noncoding |
| MSTRG. 31531.1  | 1.13827   | coding    |
| MSTRG. 31531.2  | 1.18088   | coding    |
| MSTRG. 31532.2  | 3.19763   | coding    |
| MSTRG. 31531.4  | 2.85821   | coding    |
| MSTRG. 31533.1  | 0.355476  | coding    |
| MSTRG. 31531.8  | 1.22851   | coding    |
| MSTRG. 31536.1  | -1.46306  | noncoding |
| MSTRG. 31537.13 | 1.07574   | coding    |
| MSTRG. 31543.1  | 1.79707   | coding    |
| MSTRG. 31544.3  | -0.889566 | noncoding |
| MSTRG. 31546.5  | 2.26441   | coding    |
| MSTRG. 31546.7  | 2.53582   | coding    |
| MSTRG. 31548.1  | 0.327623  | coding    |
| MSTRG. 31548.2  | 0.325744  | coding    |
| MSTRG. 31548.3  | 0.344558  | coding    |
| MSTRG. 31548.4  | 0.347599  | coding    |
| MSTRG. 31548.5  | 0.326906  | coding    |
| MSTRG. 31549.3  | -0.51599  | noncoding |
| MSTRG. 31551.3  | 0.646057  | coding    |
| MSTRG. 31551.2  | 2.29582   | coding    |
| MSTRG. 31552.1  | -0.785302 | noncoding |
| MSTRG. 31551.4  | 1.80243   | coding    |
| MSTRG. 31559.1  | 2.98812   | coding    |
| MSTRG. 31559.3  | 2.44332   | coding    |
| MSTRG. 31559.4  | 2.43627   | coding    |
| MSTRG. 31559.5  | 2.48888   | coding    |
| MSTRG. 31559.6  | 1.64746   | coding    |
| MSTRG. 31563.1  | 2.40293   | coding    |

|                 |           |           |
|-----------------|-----------|-----------|
| MSTRG. 31564.2  | 2.5617    | coding    |
| MSTRG. 31565.1  | -2.51882  | noncoding |
| MSTRG. 31566.2  | -0.422226 | noncoding |
| MSTRG. 31570.4  | 0.588891  | coding    |
| MSTRG. 31570.5  | 2.41893   | coding    |
| MSTRG. 31570.3  | 2.40063   | coding    |
| MSTRG. 31570.6  | 2.28156   | coding    |
| MSTRG. 31570.9  | 1.3852    | coding    |
| MSTRG. 31570.8  | 0.609004  | coding    |
| MSTRG. 31570.7  | 2.15258   | coding    |
| MSTRG. 31571.2  | -1.03332  | noncoding |
| MSTRG. 31571.1  | -0.281071 | noncoding |
| MSTRG. 31571.3  | -0.324728 | noncoding |
| MSTRG. 31571.4  | -0.834795 | noncoding |
| MSTRG. 31567.2  | 0.870533  | coding    |
| MSTRG. 31576.1  | -2.19344  | noncoding |
| MSTRG. 31581.4  | 1.10245   | coding    |
| MSTRG. 31586.5  | -1.57657  | noncoding |
| MSTRG. 31584.2  | 1.40988   | coding    |
| MSTRG. 31591.1  | -1.10992  | noncoding |
| MSTRG. 31598.1  | 1.79006   | coding    |
| MSTRG. 31598.2  | 1.94902   | coding    |
| MSTRG. 31598.3  | 1.94555   | coding    |
| MSTRG. 31598.5  | 1.84593   | coding    |
| MSTRG. 31598.4  | 1.83731   | coding    |
| MSTRG. 31599.3  | 1.8174    | coding    |
| MSTRG. 31599.4  | 1.79619   | coding    |
| MSTRG. 31597.1  | 1.03386   | coding    |
| MSTRG. 31597.2  | 1.31248   | coding    |
| MSTRG. 31603.2  | 1.55917   | coding    |
| MSTRG. 31603.3  | 1.16917   | coding    |
| MSTRG. 31603.4  | 0.657023  | coding    |
| MSTRG. 31603.8  | 0.583422  | coding    |
| MSTRG. 31603.11 | 0.914032  | coding    |
| MSTRG. 31602.2  | 0.800772  | coding    |
| MSTRG. 31606.1  | 1.57865   | coding    |
| MSTRG. 31606.2  | 1.10777   | coding    |
| MSTRG. 31606.3  | -0.803983 | noncoding |
| MSTRG. 31606.4  | -0.326076 | noncoding |
| MSTRG. 31607.1  | 0.277551  | coding    |
| MSTRG. 31606.6  | 0.7124    | coding    |
| MSTRG. 31606.7  | 1.2938    | coding    |
| MSTRG. 31606.8  | 1.35873   | coding    |
| MSTRG. 31608.1  | 1.28839   | coding    |
| MSTRG. 31606.10 | 1.37992   | coding    |
| MSTRG. 31606.11 | 1.12982   | coding    |
| MSTRG. 31617.1  | 1.50836   | coding    |
| MSTRG. 31618.1  | 0.798245  | coding    |
| MSTRG. 31618.4  | 0.553975  | coding    |
| MSTRG. 31618.5  | 0.85834   | coding    |
| MSTRG. 31619.1  | 1.65575   | coding    |
| MSTRG. 31620.1  | -1.04122  | noncoding |
| MSTRG. 31622.2  | 2.9348    | coding    |
| MSTRG. 31623.4  | 1.36909   | coding    |

|                |           |           |
|----------------|-----------|-----------|
| MSTRG. 31625.1 | -1.57294  | noncoding |
| MSTRG. 31626.3 | 1.06854   | coding    |
| MSTRG. 31626.4 | 1.22046   | coding    |
| MSTRG. 31626.5 | 0.970246  | coding    |
| MSTRG. 31627.1 | -1.35005  | noncoding |
| MSTRG. 31613.2 | 2.13021   | coding    |
| MSTRG. 31613.3 | 1.33562   | coding    |
| MSTRG. 31614.1 | -0.285078 | noncoding |
| MSTRG. 31630.5 | 1.59755   | coding    |
| MSTRG. 31630.6 | 1.24054   | coding    |
| MSTRG. 31633.1 | -1.34936  | noncoding |
| MSTRG. 31633.2 | -1.12967  | noncoding |
| MSTRG. 31629.1 | -0.317517 | noncoding |
| MSTRG. 31636.5 | -0.176443 | noncoding |
| MSTRG. 31637.2 | -0.006709 | noncoding |
| MSTRG. 31637.3 | 1.54483   | coding    |
| MSTRG. 31638.1 | 0.773826  | coding    |
| MSTRG. 31640.1 | 0.736405  | coding    |
| MSTRG. 31641.1 | -0.029983 | noncoding |
| MSTRG. 31642.1 | -0.373189 | noncoding |
| MSTRG. 31643.1 | 0.287312  | coding    |
| MSTRG. 31637.6 | -0.481845 | noncoding |
| MSTRG. 31644.2 | 0.985952  | coding    |
| MSTRG. 31644.5 | 3.20908   | coding    |
| MSTRG. 31648.1 | -0.546002 | noncoding |
| MSTRG. 31648.2 | -0.691006 | noncoding |
| MSTRG. 31648.3 | 1.14662   | coding    |
| MSTRG. 31648.5 | 1.40473   | coding    |
| MSTRG. 31650.1 | -2.59115  | noncoding |
| MSTRG. 31651.2 | 1.62605   | coding    |
| MSTRG. 31661.1 | -0.254867 | noncoding |
| MSTRG. 31662.1 | -0.789025 | noncoding |
| MSTRG. 31672.2 | -0.235982 | noncoding |
| MSTRG. 31672.3 | 1.58134   | coding    |
| MSTRG. 31673.1 | -0.470447 | noncoding |
| MSTRG. 31678.2 | -0.515555 | noncoding |
| MSTRG. 31678.1 | -0.511361 | noncoding |
| MSTRG. 31679.2 | 1.74586   | coding    |
| MSTRG. 31682.1 | -0.630558 | noncoding |
| MSTRG. 31690.1 | -0.696218 | noncoding |
| MSTRG. 31691.1 | 2.29125   | coding    |
| MSTRG. 31691.2 | 2.30816   | coding    |
| MSTRG. 31692.1 | -1.21058  | noncoding |
| MSTRG. 31691.3 | 2.28758   | coding    |
| MSTRG. 31700.1 | -0.274494 | noncoding |
| MSTRG. 31703.2 | -1.43926  | noncoding |
| MSTRG. 31694.1 | -0.90427  | noncoding |
| MSTRG. 31721.4 | -0.169423 | noncoding |
| MSTRG. 31722.2 | -1.79765  | noncoding |
| MSTRG. 31723.5 | 0.136127  | coding    |
| MSTRG. 31723.6 | 0.538593  | coding    |
| MSTRG. 31725.2 | 2.18122   | coding    |
| MSTRG. 31725.3 | 2.11077   | coding    |
| MSTRG. 31725.4 | 1.42318   | coding    |



|                 |           |           |
|-----------------|-----------|-----------|
| MSTRG. 31729.1  | -1.75849  | noncoding |
| MSTRG. 31742.2  | 0.678552  | coding    |
| MSTRG. 31740.1  | 1.15307   | coding    |
| MSTRG. 31743.1  | 0.294263  | coding    |
| MSTRG. 31743.2  | 0.017003  | coding    |
| MSTRG. 31743.3  | 0.212149  | coding    |
| MSTRG. 31745.3  | 1.09608   | coding    |
| MSTRG. 31745.6  | 1.73541   | coding    |
| MSTRG. 31745.7  | 1.07152   | coding    |
| MSTRG. 31746.1  | 0.110034  | coding    |
| MSTRG. 31747.1  | -0.302702 | noncoding |
| MSTRG. 31745.10 | 0.503529  | coding    |
| MSTRG. 31748.1  | -1.89474  | noncoding |
| MSTRG. 31748.2  | -1.82297  | noncoding |
| MSTRG. 31748.3  | -1.76465  | noncoding |
| MSTRG. 31749.1  | -1.62007  | noncoding |
| MSTRG. 31750.1  | -1.85612  | noncoding |
| MSTRG. 31753.1  | 0.265799  | coding    |
| MSTRG. 31757.4  | 2.31441   | coding    |
| MSTRG. 31757.5  | 1.66099   | coding    |
| MSTRG. 31758.1  | 1.39609   | coding    |
| MSTRG. 31766.1  | 0.591776  | coding    |
| MSTRG. 31777.1  | -1.99719  | noncoding |
| MSTRG. 31763.1  | -1.28955  | noncoding |
| MSTRG. 31786.3  | 0.249335  | coding    |
| MSTRG. 31786.2  | 0.357008  | coding    |
| MSTRG. 31787.1  | -2.20479  | noncoding |
| MSTRG. 31786.4  | -1.71363  | noncoding |
| MSTRG. 31786.7  | -1.74875  | noncoding |
| MSTRG. 31786.10 | -1.23164  | noncoding |
| MSTRG. 31786.11 | -2.01534  | noncoding |
| MSTRG. 31786.12 | -1.8477   | noncoding |
| MSTRG. 31796.5  | 1.5397    | coding    |
| MSTRG. 31796.4  | 1.9134    | coding    |
| MSTRG. 31796.6  | 1.91158   | coding    |
| MSTRG. 31797.1  | 0.239744  | coding    |
| MSTRG. 31799.1  | 0.940384  | coding    |
| MSTRG. 31801.1  | 0.736106  | coding    |
| MSTRG. 31801.2  | 0.036757  | coding    |
| MSTRG. 31801.3  | -0.223358 | noncoding |
| MSTRG. 31801.4  | 0.356521  | coding    |
| MSTRG. 31801.5  | 0.580646  | coding    |
| MSTRG. 31801.6  | 0.090836  | coding    |
| MSTRG. 31801.7  | -0.536647 | noncoding |
| MSTRG. 31801.8  | 0.198291  | coding    |
| MSTRG. 31789.1  | 0.984629  | coding    |
| MSTRG. 31789.2  | 1.4786    | coding    |
| MSTRG. 31790.1  | 0.304278  | coding    |
| MSTRG. 31792.2  | 1.65475   | coding    |
| MSTRG. 31792.3  | 0.602789  | coding    |
| MSTRG. 31793.1  | -2.32835  | noncoding |
| MSTRG. 31793.2  | -2.32788  | noncoding |
| MSTRG. 31792.4  | 0.03921   | coding    |
| MSTRG. 31803.1  | 2.66131   | coding    |

|                 |           |           |
|-----------------|-----------|-----------|
| MSTRG. 31803.3  | 1.33097   | coding    |
| MSTRG. 31804.1  | -2.137    | noncoding |
| MSTRG. 31805.5  | -2.08812  | noncoding |
| MSTRG. 31805.3  | -1.5942   | noncoding |
| MSTRG. 31805.1  | -1.67135  | noncoding |
| MSTRG. 31805.4  | -1.76143  | noncoding |
| MSTRG. 31806.1  | 1.02841   | coding    |
| MSTRG. 31810.1  | -2.25873  | noncoding |
| MSTRG. 31812.5  | 0.937847  | coding    |
| MSTRG. 31812.9  | -0.394391 | noncoding |
| MSTRG. 31812.8  | -0.38106  | noncoding |
| MSTRG. 31813.1  | -1.17826  | noncoding |
| MSTRG. 31812.12 | 0.043082  | coding    |
| MSTRG. 31812.10 | -0.037715 | noncoding |
| MSTRG. 31815.4  | 2.74983   | coding    |
| MSTRG. 31815.2  | 2.52343   | coding    |
| MSTRG. 31815.3  | 2.5256    | coding    |
| MSTRG. 31815.5  | 0.820895  | coding    |
| MSTRG. 31818.2  | 1.23324   | coding    |
| MSTRG. 31818.3  | 1.89802   | coding    |
| MSTRG. 31818.7  | 2.05282   | coding    |
| MSTRG. 31820.2  | 0.111778  | coding    |
| MSTRG. 31820.3  | -0.258681 | noncoding |
| MSTRG. 31820.4  | 0.106646  | coding    |
| MSTRG. 31820.5  | -0.40131  | noncoding |
| MSTRG. 31820.6  | 0.020601  | coding    |
| MSTRG. 31820.7  | -0.331913 | noncoding |
| MSTRG. 31820.8  | 0.010176  | coding    |
| MSTRG. 31820.9  | -0.154979 | noncoding |
| MSTRG. 31822.2  | 2.48429   | coding    |
| MSTRG. 31824.1  | -0.859309 | noncoding |
| MSTRG. 31826.1  | 0.238658  | coding    |
| MSTRG. 31829.1  | -1.53406  | noncoding |
| MSTRG. 31833.4  | 0.118003  | coding    |
| MSTRG. 31838.1  | -0.17283  | noncoding |
| MSTRG. 31839.2  | 0.922509  | coding    |
| MSTRG. 31865.1  | 0.129774  | coding    |
| MSTRG. 31867.3  | 0.645686  | coding    |
| MSTRG. 31867.5  | 0.329959  | coding    |
| MSTRG. 31867.7  | 0.383856  | coding    |
| MSTRG. 31867.6  | 0.439541  | coding    |
| MSTRG. 31868.1  | -0.128019 | noncoding |
| MSTRG. 31867.8  | -0.470689 | noncoding |
| MSTRG. 31859.4  | 1.48639   | coding    |
| MSTRG. 31859.3  | 1.39423   | coding    |
| MSTRG. 31861.2  | 1.18451   | coding    |
| MSTRG. 31875.1  | -1.20542  | noncoding |
| MSTRG. 31883.1  | -2.40569  | noncoding |
| MSTRG. 31885.3  | 1.00406   | coding    |
| MSTRG. 31885.4  | 0.496223  | coding    |
| MSTRG. 31886.1  | -1.26483  | noncoding |
| MSTRG. 31886.2  | -0.962001 | noncoding |
| MSTRG. 31897.1  | 0.655064  | coding    |
| MSTRG. 31898.1  | 0.06357   | coding    |

|                 |           |           |
|-----------------|-----------|-----------|
| MSTRG. 31897.2  | 0.03801   | coding    |
| MSTRG. 31904.1  | -2.09202  | noncoding |
| MSTRG. 31907.1  | -1.30094  | noncoding |
| MSTRG. 31905.1  | -2.30277  | noncoding |
| MSTRG. 31909.1  | -1.32796  | noncoding |
| MSTRG. 31910.1  | 1.54786   | coding    |
| MSTRG. 31911.2  | 0.633634  | coding    |
| MSTRG. 31914.2  | -0.698965 | noncoding |
| MSTRG. 31914.3  | -0.456183 | noncoding |
| MSTRG. 31917.7  | -1.05282  | noncoding |
| MSTRG. 31919.1  | 1.52873   | coding    |
| MSTRG. 31920.6  | 1.45881   | coding    |
| MSTRG. 31920.8  | 1.23901   | coding    |
| MSTRG. 31920.9  | 1.19479   | coding    |
| MSTRG. 31923.1  | -2.23049  | noncoding |
| MSTRG. 31923.2  | -2.4409   | noncoding |
| MSTRG. 31994.3  | -0.364604 | noncoding |
| MSTRG. 31998.2  | 0.786675  | coding    |
| MSTRG. 31999.1  | 0.505534  | coding    |
| MSTRG. 32003.1  | -0.013406 | noncoding |
| MSTRG. 32003.2  | 0.007501  | coding    |
| MSTRG. 32016.1  | -1.99742  | noncoding |
| MSTRG. 32029.1  | -1.09556  | noncoding |
| MSTRG. 32030.1  | -0.988868 | noncoding |
| MSTRG. 32051.1  | -1.66229  | noncoding |
| MSTRG. 32052.1  | 0.2743    | coding    |
| MSTRG. 32052.2  | 0.270014  | coding    |
| MSTRG. 31935.1  | 1.80218   | coding    |
| MSTRG. 31935.2  | 0.981747  | coding    |
| MSTRG. 31935.6  | 1.39667   | coding    |
| MSTRG. 31935.8  | 1.43779   | coding    |
| MSTRG. 31935.9  | 2.00259   | coding    |
| MSTRG. 31935.10 | 0.064801  | coding    |
| MSTRG. 31936.3  | -2.52974  | noncoding |
| MSTRG. 31939.1  | -1.15513  | noncoding |
| MSTRG. 31939.2  | -0.991851 | noncoding |
| MSTRG. 31939.3  | -1.55789  | noncoding |
| MSTRG. 31939.4  | -0.952806 | noncoding |
| MSTRG. 31940.1  | -0.327575 | noncoding |
| MSTRG. 31941.1  | 0.583515  | coding    |
| MSTRG. 31941.2  | 0.693202  | coding    |
| MSTRG. 31941.3  | 0.865137  | coding    |
| MSTRG. 31941.4  | 0.591034  | coding    |
| MSTRG. 31942.4  | -0.249177 | noncoding |
| MSTRG. 31928.2  | 0.660677  | coding    |
| MSTRG. 31930.1  | -1.37451  | noncoding |
| MSTRG. 31930.2  | 0.632829  | coding    |
| MSTRG. 31948.1  | -0.746301 | noncoding |
| MSTRG. 31963.1  | -2.03899  | noncoding |
| MSTRG. 31968.1  | -0.702901 | noncoding |
| MSTRG. 31981.1  | 0.494575  | coding    |
| MSTRG. 31990.1  | -0.248274 | noncoding |
| MSTRG. 31992.2  | 3.06425   | coding    |
| MSTRG. 32053.1  | 0.608654  | coding    |

|                |           |           |
|----------------|-----------|-----------|
| MSTRG. 32054.1 | -0.924751 | noncoding |
| MSTRG. 32056.2 | 0.273783  | coding    |
| MSTRG. 32056.3 | 0.927     | coding    |
| MSTRG. 32058.1 | -0.59543  | noncoding |
| MSTRG. 32059.1 | 1.78947   | coding    |
| MSTRG. 32068.2 | 0.623736  | coding    |
| MSTRG. 32055.2 | -0.488002 | noncoding |
| MSTRG. 32069.2 | -0.71541  | noncoding |
| MSTRG. 32070.3 | -0.84548  | noncoding |
| MSTRG. 32072.3 | -0.464583 | noncoding |
| MSTRG. 32076.5 | 0.561584  | coding    |
| MSTRG. 32076.7 | 0.377559  | coding    |
| MSTRG. 32076.3 | 1.01058   | coding    |
| MSTRG. 32076.4 | 1.02753   | coding    |
| MSTRG. 32076.6 | 0.997344  | coding    |
| MSTRG. 32077.1 | -2.38017  | noncoding |
| MSTRG. 32078.1 | 0.432423  | coding    |
| MSTRG. 32084.1 | -2.03226  | noncoding |
| MSTRG. 32085.1 | -1.76485  | noncoding |
| MSTRG. 32086.1 | -1.47494  | noncoding |
| MSTRG. 32091.1 | -0.289966 | noncoding |
| MSTRG. 32091.2 | -1.22003  | noncoding |
| MSTRG. 32104.3 | 0.262769  | coding    |
| MSTRG. 32105.1 | -0.372987 | noncoding |
| MSTRG. 32106.1 | -2.03953  | noncoding |
| MSTRG. 32107.1 | -0.972751 | noncoding |
| MSTRG. 32108.2 | -1.15126  | noncoding |
| MSTRG. 32108.1 | -0.283244 | noncoding |
| MSTRG. 32109.1 | -1.73876  | noncoding |
| MSTRG. 32110.1 | 0.072495  | coding    |
| MSTRG. 32104.4 | 0.806065  | coding    |
| MSTRG. 32111.1 | 0.10839   | coding    |
| MSTRG. 32112.1 | 0.300505  | coding    |
| MSTRG. 32094.1 | -1.85231  | noncoding |
| MSTRG. 32094.2 | -1.96611  | noncoding |
| MSTRG. 32113.1 | -1.49946  | noncoding |
| MSTRG. 32114.2 | -0.559137 | noncoding |
| MSTRG. 32115.1 | -2.68883  | noncoding |
| MSTRG. 32116.2 | 1.29255   | coding    |
| MSTRG. 32119.1 | -1.26439  | noncoding |
| MSTRG. 32123.1 | -2.26384  | noncoding |
| MSTRG. 32128.1 | -0.237896 | noncoding |
| MSTRG. 32129.1 | -0.621358 | noncoding |
| MSTRG. 32130.2 | -0.974539 | noncoding |
| MSTRG. 32130.1 | -0.63783  | noncoding |
| MSTRG. 32130.3 | -0.664568 | noncoding |
| MSTRG. 32133.1 | 0.17615   | coding    |
| MSTRG. 32134.1 | 2.17953   | coding    |
| MSTRG. 32134.2 | 1.97629   | coding    |
| MSTRG. 32134.4 | 0.143573  | coding    |
| MSTRG. 32137.1 | 2.01328   | coding    |
| MSTRG. 32137.2 | 2.04367   | coding    |
| MSTRG. 32137.3 | 2.05314   | coding    |
| MSTRG. 32136.1 | -1.17883  | noncoding |

|                |           |           |
|----------------|-----------|-----------|
| MSTRG. 32140.1 | -1.7869   | noncoding |
| MSTRG. 32141.1 | 0.913734  | coding    |
| MSTRG. 32142.1 | -0.668533 | noncoding |
| MSTRG. 32143.4 | 1.33531   | coding    |
| MSTRG. 32146.1 | 1.69059   | coding    |
| MSTRG. 32154.2 | 2.23488   | coding    |
| MSTRG. 32155.1 | 2.35917   | coding    |
| MSTRG. 32155.2 | 1.91087   | coding    |
| MSTRG. 32158.3 | -0.731198 | noncoding |
| MSTRG. 32163.1 | -1.22123  | noncoding |
| MSTRG. 32164.1 | 0.776159  | coding    |
| MSTRG. 32150.2 | 0.74427   | coding    |
| MSTRG. 32150.3 | 1.01934   | coding    |
| MSTRG. 32167.2 | -1.11513  | noncoding |
| MSTRG. 32167.3 | -1.37838  | noncoding |
| MSTRG. 32168.1 | -1.39653  | noncoding |
| MSTRG. 32169.2 | 0.170478  | coding    |
| MSTRG. 32166.1 | -1.79213  | noncoding |
| MSTRG. 32172.2 | 1.2841    | coding    |
| MSTRG. 32176.4 | 0.971398  | coding    |
| MSTRG. 32176.3 | 0.512295  | coding    |
| MSTRG. 32177.1 | -0.466223 | noncoding |
| MSTRG. 32180.1 | 1.5872    | coding    |
| MSTRG. 32181.4 | 1.14933   | coding    |
| MSTRG. 32183.6 | -0.490421 | noncoding |
| MSTRG. 32184.1 | -0.673764 | noncoding |
| MSTRG. 32184.3 | 0.565532  | coding    |
| MSTRG. 32199.1 | 0.20377   | coding    |
| MSTRG. 32199.2 | -0.928511 | noncoding |
| MSTRG. 32199.3 | -0.318293 | noncoding |
| MSTRG. 32201.1 | -1.10142  | noncoding |
| MSTRG. 32203.2 | 2.69516   | coding    |
| MSTRG. 32203.4 | 2.45752   | coding    |
| MSTRG. 32206.2 | 1.20345   | coding    |
| MSTRG. 32206.4 | 0.852147  | coding    |
| MSTRG. 32206.5 | 1.10503   | coding    |
| MSTRG. 32208.2 | 1.13992   | coding    |
| MSTRG. 32204.2 | -0.401879 | noncoding |
| MSTRG. 32212.1 | -0.384505 | noncoding |
| MSTRG. 32225.1 | -1.85036  | noncoding |
| MSTRG. 32227.1 | -2.87927  | noncoding |
| MSTRG. 32229.2 | 0.453278  | coding    |
| MSTRG. 32232.1 | 2.56587   | coding    |
| MSTRG. 32232.2 | 2.03681   | coding    |
| MSTRG. 32231.1 | -2.27324  | noncoding |
| MSTRG. 32231.2 | -2.28094  | noncoding |
| MSTRG. 32237.2 | 0.402714  | coding    |
| MSTRG. 32238.1 | -0.892041 | noncoding |
| MSTRG. 32239.1 | -0.399832 | noncoding |
| MSTRG. 32241.1 | -1.79863  | noncoding |
| MSTRG. 32242.1 | 0.162022  | coding    |
| MSTRG. 32246.2 | 2.25848   | coding    |
| MSTRG. 32246.3 | 2.23304   | coding    |
| MSTRG. 32249.1 | 2.07619   | coding    |

|                  |            |           |
|------------------|------------|-----------|
| MSTRG. 32249. 5  | 1. 15618   | coding    |
| MSTRG. 32250. 1  | -1. 03015  | noncoding |
| MSTRG. 32251. 1  | 0. 622975  | coding    |
| MSTRG. 32251. 2  | 0. 847059  | coding    |
| MSTRG. 32252. 1  | -1. 3185   | noncoding |
| MSTRG. 32254. 1  | 0. 765555  | coding    |
| MSTRG. 32257. 1  | -0. 847298 | noncoding |
| MSTRG. 32260. 2  | 0. 451876  | coding    |
| MSTRG. 32265. 1  | 0. 145176  | coding    |
| MSTRG. 32266. 1  | -0. 80356  | noncoding |
| MSTRG. 32267. 1  | -0. 197447 | noncoding |
| MSTRG. 32270. 2  | -1. 14054  | noncoding |
| MSTRG. 32275. 3  | -0. 097145 | noncoding |
| MSTRG. 32275. 1  | -0. 034347 | noncoding |
| MSTRG. 32275. 2  | 0. 546212  | coding    |
| MSTRG. 32275. 6  | 0. 220313  | coding    |
| MSTRG. 32275. 7  | -0. 07128  | noncoding |
| MSTRG. 32276. 4  | 0. 159959  | coding    |
| MSTRG. 32278. 3  | 1. 40802   | coding    |
| MSTRG. 32278. 4  | 1. 59467   | coding    |
| MSTRG. 32277. 1  | 2. 08651   | coding    |
| MSTRG. 32283. 1  | -1. 92076  | noncoding |
| MSTRG. 32283. 2  | -1. 87113  | noncoding |
| MSTRG. 32285. 1  | -1. 06581  | noncoding |
| MSTRG. 32286. 1  | -0. 137561 | noncoding |
| MSTRG. 32289. 1  | 2. 78355   | coding    |
| MSTRG. 32291. 2  | 0. 262408  | coding    |
| MSTRG. 32292. 1  | 2. 7753    | coding    |
| MSTRG. 32292. 3  | 2. 77405   | coding    |
| MSTRG. 32293. 1  | 0. 877148  | coding    |
| MSTRG. 32300. 3  | 0. 480004  | coding    |
| MSTRG. 32300. 5  | 0. 644774  | coding    |
| MSTRG. 32301. 3  | 1. 57012   | coding    |
| MSTRG. 32305. 2  | 0. 03315   | coding    |
| MSTRG. 32324. 12 | 1. 35285   | coding    |
| MSTRG. 32324. 17 | 1. 3341    | coding    |
| MSTRG. 32324. 18 | 1. 21625   | coding    |
| MSTRG. 32324. 20 | 1. 36831   | coding    |
| MSTRG. 32324. 21 | 1. 35181   | coding    |
| MSTRG. 32324. 3  | 1. 72579   | coding    |
| MSTRG. 32324. 33 | 1. 48259   | coding    |
| MSTRG. 32324. 35 | 1. 50981   | coding    |
| MSTRG. 32324. 38 | 1. 39354   | coding    |
| MSTRG. 32324. 40 | 1. 38091   | coding    |
| MSTRG. 32324. 43 | 1. 38781   | coding    |
| MSTRG. 32324. 47 | 1. 15857   | coding    |
| MSTRG. 32324. 49 | 1. 2273    | coding    |
| MSTRG. 32324. 50 | 1. 30737   | coding    |
| MSTRG. 32324. 53 | 1. 6408    | coding    |
| MSTRG. 32324. 55 | 1. 32918   | coding    |
| MSTRG. 32324. 56 | 1. 20599   | coding    |
| MSTRG. 32324. 7  | 1. 43642   | coding    |
| MSTRG. 32324. 9  | 1. 2141    | coding    |
| MSTRG. 32310. 3  | 2. 18655   | coding    |

|                 |           |           |
|-----------------|-----------|-----------|
| MSTRG. 32310.4  | 2.07755   | coding    |
| MSTRG. 32322.7  | 2.29308   | coding    |
| MSTRG. 32322.10 | 2.10526   | coding    |
| MSTRG. 32322.12 | 2.04104   | coding    |
| MSTRG. 32322.8  | 1.90768   | coding    |
| MSTRG. 32322.11 | 1.88872   | coding    |
| MSTRG. 32322.3  | 1.90189   | coding    |
| MSTRG. 32322.4  | 2.38342   | coding    |
| MSTRG. 32322.9  | 2.21447   | coding    |
| MSTRG. 32322.2  | 2.26206   | coding    |
| MSTRG. 32322.16 | 2.2805    | coding    |
| MSTRG. 32323.1  | 0.07683   | coding    |
| MSTRG. 32320.3  | 0.918563  | coding    |
| MSTRG. 32331.1  | 1.28552   | coding    |
| MSTRG. 32331.3  | 1.17999   | coding    |
| MSTRG. 32331.4  | 1.16736   | coding    |
| MSTRG. 32331.5  | 1.85133   | coding    |
| MSTRG. 32331.6  | 2.09852   | coding    |
| MSTRG. 32334.1  | 1.67352   | coding    |
| MSTRG. 32334.2  | 1.6975    | coding    |
| MSTRG. 32334.3  | 1.89124   | coding    |
| MSTRG. 32338.1  | -1.7216   | noncoding |
| MSTRG. 32339.2  | -0.264191 | noncoding |
| MSTRG. 32339.1  | 0.095509  | coding    |
| MSTRG. 32339.3  | -0.576658 | noncoding |
| MSTRG. 32338.4  | 1.0757    | coding    |
| MSTRG. 32338.6  | 1.01576   | coding    |
| MSTRG. 32338.7  | 0.964856  | coding    |
| MSTRG. 32329.1  | 1.10447   | coding    |
| MSTRG. 32329.2  | 1.30455   | coding    |
| MSTRG. 32329.3  | 1.27601   | coding    |
| MSTRG. 32329.5  | 1.44862   | coding    |
| MSTRG. 32329.6  | 1.05575   | coding    |
| MSTRG. 32329.7  | 1.33843   | coding    |
| MSTRG. 32340.2  | 1.74365   | coding    |
| MSTRG. 32340.4  | 2.05078   | coding    |
| MSTRG. 32342.1  | 0.691981  | coding    |
| MSTRG. 32343.2  | -0.575918 | noncoding |
| MSTRG. 32344.1  | 0.066882  | coding    |
| MSTRG. 32350.3  | 1.81828   | coding    |
| MSTRG. 32354.2  | 1.56678   | coding    |
| MSTRG. 32354.3  | 1.74024   | coding    |
| MSTRG. 32356.1  | 2.3718    | coding    |
| MSTRG. 32358.2  | 1.3924    | coding    |
| MSTRG. 32358.3  | 1.57027   | coding    |
| MSTRG. 32358.4  | 1.55617   | coding    |
| MSTRG. 32364.3  | 0.445984  | coding    |
| MSTRG. 32365.1  | -0.479881 | noncoding |
| MSTRG. 32365.2  | -0.915382 | noncoding |
| MSTRG. 32366.5  | -0.875272 | noncoding |
| MSTRG. 32369.4  | -0.334062 | noncoding |
| MSTRG. 32369.3  | 0.258007  | coding    |
| MSTRG. 32371.2  | 1.49946   | coding    |
| MSTRG. 32371.3  | 1.77868   | coding    |

|                 |           |           |
|-----------------|-----------|-----------|
| MSTRG. 32359.2  | -0.67309  | noncoding |
| MSTRG. 32372.1  | -0.166459 | noncoding |
| MSTRG. 32377.1  | -0.806113 | noncoding |
| MSTRG. 32381.7  | 1.79613   | coding    |
| MSTRG. 32381.11 | 1.72362   | coding    |
| MSTRG. 32381.10 | 1.52976   | coding    |
| MSTRG. 32381.2  | 1.69543   | coding    |
| MSTRG. 32381.3  | 1.84522   | coding    |
| MSTRG. 32381.1  | 1.83483   | coding    |
| MSTRG. 32381.8  | 1.71849   | coding    |
| MSTRG. 32381.12 | 1.72625   | coding    |
| MSTRG. 32381.4  | 2.16513   | coding    |
| MSTRG. 32381.6  | 1.86536   | coding    |
| MSTRG. 32381.14 | -2.14154  | noncoding |
| MSTRG. 32378.1  | -1.38885  | noncoding |
| MSTRG. 32384.10 | 1.21726   | coding    |
| MSTRG. 32384.11 | 1.29205   | coding    |
| MSTRG. 32384.5  | 1.33693   | coding    |
| MSTRG. 32388.1  | 1.1937    | coding    |
| MSTRG. 32395.5  | 1.70477   | coding    |
| MSTRG. 32395.2  | 1.56786   | coding    |
| MSTRG. 32395.3  | 1.56334   | coding    |
| MSTRG. 32395.4  | 1.60041   | coding    |
| MSTRG. 32395.7  | 1.39666   | coding    |
| MSTRG. 32394.2  | 1.26181   | coding    |
| MSTRG. 32397.2  | 0.786958  | coding    |
| MSTRG. 32397.3  | 0.753359  | coding    |
| MSTRG. 32397.4  | 1.04345   | coding    |
| MSTRG. 32397.5  | 0.938082  | coding    |
| MSTRG. 32397.6  | 0.955543  | coding    |
| MSTRG. 32402.1  | 1.89894   | coding    |
| MSTRG. 32405.3  | 0.775585  | coding    |
| MSTRG. 32407.1  | -2.00797  | noncoding |
| MSTRG. 32411.2  | 2.02278   | coding    |
| MSTRG. 32412.2  | 2.01477   | coding    |
| MSTRG. 32411.3  | 1.28914   | coding    |
| MSTRG. 32411.4  | 1.13362   | coding    |
| MSTRG. 32411.5  | 1.2711    | coding    |
| MSTRG. 32415.1  | 0.627376  | coding    |
| MSTRG. 32416.3  | 1.86273   | coding    |
| MSTRG. 32418.6  | 2.629     | coding    |
| MSTRG. 32418.9  | 2.5621    | coding    |
| MSTRG. 32419.2  | 2.50791   | coding    |
| MSTRG. 32424.1  | 1.09689   | coding    |
| MSTRG. 32427.1  | -0.660848 | noncoding |
| MSTRG. 32434.2  | 0.396604  | coding    |
| MSTRG. 32441.1  | 0.008839  | coding    |
| MSTRG. 32441.2  | 0.22245   | coding    |
| MSTRG. 32441.3  | 0.015012  | coding    |
| MSTRG. 32444.1  | -0.429884 | noncoding |
| MSTRG. 32444.2  | -1.49768  | noncoding |
| MSTRG. 32456.3  | 2.35688   | coding    |
| MSTRG. 32456.2  | 2.33345   | coding    |
| MSTRG. 32447.2  | 0.075807  | coding    |



|                 |           |           |
|-----------------|-----------|-----------|
| MSTRG. 32451.2  | 1.38487   | coding    |
| MSTRG. 32457.1  | -0.966058 | noncoding |
| MSTRG. 32484.5  | 1.79207   | coding    |
| MSTRG. 32484.6  | 1.80952   | coding    |
| MSTRG. 32484.1  | 2.36456   | coding    |
| MSTRG. 32484.4  | 2.31009   | coding    |
| MSTRG. 32484.3  | 1.69049   | coding    |
| MSTRG. 32484.2  | 2.2691    | coding    |
| MSTRG. 32484.7  | 2.31007   | coding    |
| MSTRG. 32484.8  | 1.9163    | coding    |
| MSTRG. 32484.9  | 2.13838   | coding    |
| MSTRG. 32484.11 | 1.0079    | coding    |
| MSTRG. 32489.1  | -0.277717 | noncoding |
| MSTRG. 32489.2  | -0.252063 | noncoding |
| MSTRG. 32492.2  | 1.91905   | coding    |
| MSTRG. 32492.5  | 2.17364   | coding    |
| MSTRG. 32494.1  | -1.90625  | noncoding |
| MSTRG. 32468.1  | 1.82923   | coding    |
| MSTRG. 32468.4  | 2.2766    | coding    |
| MSTRG. 32468.5  | 2.20919   | coding    |
| MSTRG. 32468.6  | -0.17661  | noncoding |
| MSTRG. 32469.1  | 0.94875   | coding    |
| MSTRG. 32474.2  | -0.834974 | noncoding |
| MSTRG. 32474.3  | -0.730834 | noncoding |
| MSTRG. 32480.1  | 0.720373  | coding    |
| MSTRG. 32497.2  | 0.106655  | coding    |
| MSTRG. 32501.2  | 0.921496  | coding    |
| MSTRG. 32501.3  | 0.563497  | coding    |
| MSTRG. 32507.4  | 1.77896   | coding    |
| MSTRG. 32507.3  | 1.81999   | coding    |
| MSTRG. 32507.6  | 0.909338  | coding    |
| MSTRG. 32509.1  | 1.12062   | coding    |
| MSTRG. 32509.3  | 0.962073  | coding    |
| MSTRG. 32513.1  | -1.00902  | noncoding |
| MSTRG. 32513.2  | -0.717418 | noncoding |
| MSTRG. 32514.4  | 2.81979   | coding    |
| MSTRG. 32514.5  | 1.05549   | coding    |
| MSTRG. 32515.1  | 0.078301  | coding    |
| MSTRG. 32519.1  | 1.34745   | coding    |
| MSTRG. 32519.3  | 1.00168   | coding    |
| MSTRG. 32519.4  | 1.24912   | coding    |
| MSTRG. 32519.5  | 0.831806  | coding    |
| MSTRG. 32519.6  | 0.520049  | coding    |
| MSTRG. 32519.7  | 1.20253   | coding    |
| MSTRG. 32519.8  | 1.15511   | coding    |
| MSTRG. 32519.9  | 0.365894  | coding    |
| MSTRG. 32520.1  | 0.012215  | coding    |
| MSTRG. 32520.2  | -0.241362 | noncoding |
| MSTRG. 32520.3  | 0.075832  | coding    |
| MSTRG. 32520.4  | -0.747179 | noncoding |
| MSTRG. 32520.5  | 0.0437    | coding    |
| MSTRG. 32523.3  | 0.107318  | coding    |
| MSTRG. 32528.2  | -0.592864 | noncoding |
| MSTRG. 32528.1  | -1.47003  | noncoding |

|                  |            |           |
|------------------|------------|-----------|
| MSTRG. 32534. 11 | 0. 557143  | coding    |
| MSTRG. 32534. 10 | 0. 182966  | coding    |
| MSTRG. 32534. 3  | -0. 132952 | noncoding |
| MSTRG. 32534. 4  | -0. 153601 | noncoding |
| MSTRG. 32534. 6  | -0. 130648 | noncoding |
| MSTRG. 32534. 7  | -0. 137169 | noncoding |
| MSTRG. 32534. 13 | 1. 71857   | coding    |
| MSTRG. 32534. 5  | 2. 62426   | coding    |
| MSTRG. 32534. 12 | 2. 7766    | coding    |
| MSTRG. 32534. 8  | 2. 82456   | coding    |
| MSTRG. 32542. 1  | -0. 753844 | noncoding |
| MSTRG. 32542. 3  | -0. 64789  | noncoding |
| MSTRG. 32545. 1  | -1. 59312  | noncoding |
| MSTRG. 32546. 2  | 2. 19501   | coding    |
| MSTRG. 32547. 4  | 0. 864234  | coding    |
| MSTRG. 32547. 5  | 0. 952414  | coding    |
| MSTRG. 32547. 6  | 0. 725849  | coding    |
| MSTRG. 32549. 1  | -0. 083958 | noncoding |
| MSTRG. 32549. 2  | 0. 056652  | coding    |
| MSTRG. 32549. 3  | -0. 073987 | noncoding |
| MSTRG. 32550. 1  | -0. 555846 | noncoding |
| MSTRG. 32552. 1  | -1. 5338   | noncoding |
| MSTRG. 32554. 2  | -1. 31677  | noncoding |
| MSTRG. 32554. 1  | -1. 08953  | noncoding |
| MSTRG. 32554. 3  | -0. 687107 | noncoding |
| MSTRG. 32538. 2  | -0. 305621 | noncoding |
| MSTRG. 32538. 4  | -0. 439495 | noncoding |
| MSTRG. 32538. 5  | 1. 40633   | coding    |
| MSTRG. 32541. 1  | 1. 98558   | coding    |
| MSTRG. 32541. 4  | 2. 06616   | coding    |
| MSTRG. 32557. 1  | -1. 77943  | noncoding |
| MSTRG. 32558. 1  | 1. 16212   | coding    |
| MSTRG. 32558. 2  | 1. 1916    | coding    |
| MSTRG. 32561. 2  | 1. 4637    | coding    |
| MSTRG. 32561. 3  | 1. 54155   | coding    |
| MSTRG. 32561. 4  | 1. 29877   | coding    |
| MSTRG. 32561. 5  | 1. 5166    | coding    |
| MSTRG. 32564. 1  | 1. 71355   | coding    |
| MSTRG. 32564. 2  | 1. 52901   | coding    |
| MSTRG. 32562. 1  | -0. 021217 | noncoding |
| MSTRG. 32566. 3  | 0. 100393  | coding    |
| MSTRG. 32566. 4  | 0. 21957   | coding    |
| MSTRG. 32566. 5  | -0. 451184 | noncoding |
| MSTRG. 32568. 3  | 0. 131311  | coding    |
| MSTRG. 32575. 3  | 1. 00861   | coding    |
| MSTRG. 32575. 4  | 1. 11579   | coding    |
| MSTRG. 32575. 5  | 1. 83996   | coding    |
| MSTRG. 32575. 6  | 1. 11272   | coding    |
| MSTRG. 32575. 8  | 1. 42366   | coding    |
| MSTRG. 32575. 10 | 1. 52952   | coding    |
| MSTRG. 32575. 9  | 1. 26043   | coding    |
| MSTRG. 32575. 11 | 1. 50907   | coding    |
| MSTRG. 32575. 12 | 1. 55703   | coding    |
| MSTRG. 32574. 3  | 0. 540483  | coding    |

|                 |            |           |
|-----------------|------------|-----------|
| MSTRG. 32576. 2 | -0. 30813  | noncoding |
| MSTRG. 32582. 1 | 0. 569002  | coding    |
| MSTRG. 32588. 3 | 2. 6189    | coding    |
| MSTRG. 32592. 1 | 1. 27021   | coding    |
| MSTRG. 32592. 3 | 1. 03893   | coding    |
| MSTRG. 32596. 2 | 1. 93462   | coding    |
| MSTRG. 32598. 2 | -1. 17266  | noncoding |
| MSTRG. 32606. 2 | 1. 5463    | coding    |
| MSTRG. 32606. 4 | 1. 49777   | coding    |
| MSTRG. 32606. 3 | 1. 63306   | coding    |
| MSTRG. 32607. 2 | 0. 52244   | coding    |
| MSTRG. 32607. 3 | -1. 07252  | noncoding |
| MSTRG. 32604. 3 | 1. 78256   | coding    |
| MSTRG. 32609. 2 | 1. 14068   | coding    |
| MSTRG. 32611. 1 | 0. 353358  | coding    |
| MSTRG. 32613. 1 | -0. 081947 | noncoding |
| MSTRG. 32614. 1 | 0. 43109   | coding    |
| MSTRG. 32614. 2 | 0. 738101  | coding    |
| MSTRG. 32614. 3 | 0. 789963  | coding    |
| MSTRG. 32614. 4 | 0. 856322  | coding    |
| MSTRG. 32614. 5 | 0. 470481  | coding    |
| MSTRG. 32614. 6 | 0. 674765  | coding    |
| MSTRG. 32617. 1 | 0. 063939  | coding    |
| MSTRG. 32619. 2 | 0. 32601   | coding    |
| MSTRG. 32621. 1 | -1. 78097  | noncoding |
| MSTRG. 32628. 1 | 0. 037132  | coding    |
| MSTRG. 32628. 2 | -1. 54785  | noncoding |
| MSTRG. 32640. 1 | 1. 34307   | coding    |
| MSTRG. 32641. 1 | 0. 337665  | coding    |
| MSTRG. 32641. 2 | 0. 465496  | coding    |
| MSTRG. 32641. 3 | 0. 558492  | coding    |
| MSTRG. 32641. 4 | 0. 074     | coding    |
| MSTRG. 32634. 1 | 1. 43444   | coding    |
| MSTRG. 32634. 2 | 1. 52684   | coding    |
| MSTRG. 32646. 2 | -2. 02143  | noncoding |
| MSTRG. 32646. 3 | -1. 8995   | noncoding |
| MSTRG. 32658. 1 | -0. 281203 | noncoding |
| MSTRG. 32658. 2 | -0. 053274 | noncoding |
| MSTRG. 32658. 4 | -0. 598439 | noncoding |
| MSTRG. 32658. 3 | -0. 370909 | noncoding |
| MSTRG. 32660. 1 | -1. 78066  | noncoding |
| MSTRG. 32661. 2 | 1. 69085   | coding    |
| MSTRG. 32662. 1 | -0. 631112 | noncoding |
| MSTRG. 32663. 1 | -0. 16085  | noncoding |
| MSTRG. 32664. 1 | -0. 35646  | noncoding |
| MSTRG. 32665. 1 | -1. 24394  | noncoding |
| MSTRG. 32666. 2 | -0. 850257 | noncoding |
| MSTRG. 32656. 1 | 1. 5945    | coding    |
| MSTRG. 32656. 3 | 0. 572895  | coding    |
| MSTRG. 32668. 5 | 2. 63191   | coding    |
| MSTRG. 32668. 6 | 2. 54322   | coding    |
| MSTRG. 32674. 2 | 0. 478789  | coding    |
| MSTRG. 32672. 1 | 0. 299336  | coding    |
| MSTRG. 32681. 3 | 2. 62351   | coding    |

|                 |           |           |
|-----------------|-----------|-----------|
| MSTRG. 32683.1  | 1.11443   | coding    |
| MSTRG. 32682.3  | 0.590552  | coding    |
| MSTRG. 32682.4  | 0.222158  | coding    |
| MSTRG. 32686.1  | 3.63206   | coding    |
| MSTRG. 32686.3  | 3.88327   | coding    |
| MSTRG. 32687.1  | 0.401017  | coding    |
| MSTRG. 32688.1  | -1.39537  | noncoding |
| MSTRG. 32689.1  | -0.271968 | noncoding |
| MSTRG. 32690.1  | 1.03323   | coding    |
| MSTRG. 32691.1  | -0.463142 | noncoding |
| MSTRG. 32692.1  | -1.53233  | noncoding |
| MSTRG. 32697.1  | -2.23331  | noncoding |
| MSTRG. 32698.1  | -1.49576  | noncoding |
| MSTRG. 32699.1  | 1.14264   | coding    |
| MSTRG. 32699.2  | 0.838838  | coding    |
| MSTRG. 32699.3  | 0.83079   | coding    |
| MSTRG. 32699.4  | 0.460938  | coding    |
| MSTRG. 32699.5  | 0.699686  | coding    |
| MSTRG. 32709.11 | -1.1369   | noncoding |
| MSTRG. 32712.1  | 1.38345   | coding    |
| MSTRG. 32719.2  | 0.910248  | coding    |
| MSTRG. 32720.1  | 0.141639  | coding    |
| MSTRG. 32718.2  | 0.864283  | coding    |
| MSTRG. 32723.2  | 1.74777   | coding    |
| MSTRG. 32723.3  | 1.80594   | coding    |
| MSTRG. 32723.10 | 1.55291   | coding    |
| MSTRG. 32723.8  | 1.42985   | coding    |
| MSTRG. 32723.7  | 1.42477   | coding    |
| MSTRG. 32723.11 | 1.56025   | coding    |
| MSTRG. 32723.9  | 1.69974   | coding    |
| MSTRG. 32723.12 | 1.51486   | coding    |
| MSTRG. 32723.14 | 1.5113    | coding    |
| MSTRG. 32723.16 | 1.60177   | coding    |
| MSTRG. 32723.13 | -0.086437 | noncoding |
| MSTRG. 32723.15 | 1.34398   | coding    |
| MSTRG. 32723.17 | 1.04514   | coding    |
| MSTRG. 32723.18 | 0.544761  | coding    |
| MSTRG. 32721.5  | 0.900489  | coding    |
| MSTRG. 32721.6  | 1.1207    | coding    |
| MSTRG. 32730.1  | 0.556334  | coding    |
| MSTRG. 32731.1  | -2.19828  | noncoding |
| MSTRG. 32732.1  | -0.84198  | noncoding |
| MSTRG. 32730.3  | -1.19828  | noncoding |
| MSTRG. 32738.1  | 0.387662  | coding    |
| MSTRG. 32738.2  | 0.49441   | coding    |
| MSTRG. 32738.4  | 1.77637   | coding    |
| MSTRG. 32738.5  | 0.518702  | coding    |
| MSTRG. 32738.6  | 0.496207  | coding    |
| MSTRG. 32738.7  | 0.999074  | coding    |
| MSTRG. 32739.1  | 2.17018   | coding    |
| MSTRG. 32740.1  | -2.30403  | noncoding |
| MSTRG. 32747.4  | 0.556407  | coding    |
| MSTRG. 32747.9  | 0.209654  | coding    |
| MSTRG. 32749.1  | -0.717265 | noncoding |

|                 |           |           |
|-----------------|-----------|-----------|
| MSTRG. 32751.3  | 1.58677   | coding    |
| MSTRG. 32751.2  | 1.21842   | coding    |
| MSTRG. 32752.1  | -1.67631  | noncoding |
| MSTRG. 32749.2  | -0.815227 | noncoding |
| MSTRG. 32752.2  | 0.306159  | coding    |
| MSTRG. 32752.4  | 0.154708  | coding    |
| MSTRG. 32752.5  | -0.480448 | noncoding |
| MSTRG. 32752.6  | -0.480448 | noncoding |
| MSTRG. 32752.7  | -0.395487 | noncoding |
| MSTRG. 32752.8  | -0.402964 | noncoding |
| MSTRG. 32752.9  | -0.962047 | noncoding |
| MSTRG. 32754.1  | -1.75514  | noncoding |
| MSTRG. 32754.2  | -2.32745  | noncoding |
| MSTRG. 32754.3  | -2.27262  | noncoding |
| MSTRG. 32755.1  | -1.39719  | noncoding |
| MSTRG. 32754.4  | -1.91089  | noncoding |
| MSTRG. 32756.1  | -3.08981  | noncoding |
| MSTRG. 32757.1  | -1.13241  | noncoding |
| MSTRG. 32760.1  | -1.18856  | noncoding |
| MSTRG. 32765.1  | 0.514031  | coding    |
| MSTRG. 32773.1  | -0.098616 | noncoding |
| MSTRG. 32767.1  | 1.33557   | coding    |
| MSTRG. 32781.1  | 0.821548  | coding    |
| MSTRG. 32782.1  | 0.917498  | coding    |
| MSTRG. 32796.3  | -1.71013  | noncoding |
| MSTRG. 32796.5  | -1.71013  | noncoding |
| MSTRG. 32796.4  | -1.2522   | noncoding |
| MSTRG. 32796.6  | -0.492641 | noncoding |
| MSTRG. 32796.7  | 1.11119   | coding    |
| MSTRG. 32796.9  | 0.421384  | coding    |
| MSTRG. 32796.10 | 1.11087   | coding    |
| MSTRG. 32796.8  | 1.11269   | coding    |
| MSTRG. 32796.11 | 0.951311  | coding    |
| MSTRG. 32796.12 | 1.05848   | coding    |
| MSTRG. 32796.14 | -1.97025  | noncoding |
| MSTRG. 32796.13 | 1.31255   | coding    |
| MSTRG. 32796.15 | 0.868236  | coding    |
| MSTRG. 32796.16 | 0.358379  | coding    |
| MSTRG. 32796.17 | 0.804748  | coding    |
| MSTRG. 32796.18 | 1.26683   | coding    |
| MSTRG. 32796.19 | 1.24625   | coding    |
| MSTRG. 32796.20 | 1.0564    | coding    |
| MSTRG. 32798.3  | 0.430694  | coding    |
| MSTRG. 32798.4  | 0.765478  | coding    |
| MSTRG. 32798.5  | 0.502702  | coding    |
| MSTRG. 32798.2  | 0.480139  | coding    |
| MSTRG. 32798.6  | 0.412503  | coding    |
| MSTRG. 32798.8  | -0.180348 | noncoding |
| MSTRG. 32789.1  | 2.24837   | coding    |
| MSTRG. 32792.1  | -1.5574   | noncoding |
| MSTRG. 32801.1  | 1.25975   | coding    |
| MSTRG. 32801.3  | 0.780562  | coding    |
| MSTRG. 32801.4  | 0.238048  | coding    |
| MSTRG. 32802.1  | -1.79483  | noncoding |

|                |           |           |
|----------------|-----------|-----------|
| MSTRG. 32814.2 | 2.19267   | coding    |
| MSTRG. 32815.1 | -1.86364  | noncoding |
| MSTRG. 32821.1 | 3.24728   | coding    |
| MSTRG. 32821.2 | 3.09334   | coding    |
| MSTRG. 32821.3 | 2.28697   | coding    |
| MSTRG. 32821.4 | 2.57704   | coding    |
| MSTRG. 32821.5 | 2.67734   | coding    |
| MSTRG. 32819.1 | -2.16624  | noncoding |
| MSTRG. 32820.2 | -2.3266   | noncoding |
| MSTRG. 32827.1 | -0.378188 | noncoding |
| MSTRG. 32828.1 | -1.10025  | noncoding |
| MSTRG. 32832.1 | -2.37159  | noncoding |
| MSTRG. 32832.2 | -2.6793   | noncoding |
| MSTRG. 32836.1 | 3.3863    | coding    |
| MSTRG. 32837.1 | -1.89296  | noncoding |
| MSTRG. 32841.1 | 0.044024  | coding    |
| MSTRG. 32842.7 | -1.25948  | noncoding |
| MSTRG. 32842.8 | -1.25948  | noncoding |
| MSTRG. 32842.6 | -1.27453  | noncoding |
| MSTRG. 32842.2 | -1.23336  | noncoding |
| MSTRG. 32839.1 | -2.56975  | noncoding |
| MSTRG. 32839.2 | -3.13622  | noncoding |
| MSTRG. 32839.3 | -2.98873  | noncoding |
| MSTRG. 32840.1 | -2.41161  | noncoding |
| MSTRG. 32849.1 | -1.87036  | noncoding |
| MSTRG. 32859.1 | -1.56933  | noncoding |
| MSTRG. 32860.1 | 0.376564  | coding    |
| MSTRG. 32862.1 | -1.29069  | noncoding |
| MSTRG. 32859.2 | -0.592216 | noncoding |
| MSTRG. 32855.1 | -2.04331  | noncoding |
| MSTRG. 32866.1 | -0.304094 | noncoding |
| MSTRG. 32867.1 | 0.208891  | coding    |
| MSTRG. 32867.2 | -0.331891 | noncoding |
| MSTRG. 32867.3 | -0.038746 | noncoding |
| MSTRG. 32867.4 | 0.09274   | coding    |
| MSTRG. 32867.5 | 0.426517  | coding    |
| MSTRG. 32867.6 | -0.829775 | noncoding |
| MSTRG. 32867.7 | -0.107501 | noncoding |
| MSTRG. 32863.5 | 0.689812  | coding    |
| MSTRG. 32863.6 | 1.91748   | coding    |
| MSTRG. 32864.2 | 0.556921  | coding    |
| MSTRG. 32874.3 | 1.30839   | coding    |
| MSTRG. 32874.5 | 1.26963   | coding    |
| MSTRG. 32874.6 | 0.666074  | coding    |
| MSTRG. 32876.1 | -0.668413 | noncoding |
| MSTRG. 32877.1 | -0.030485 | noncoding |
| MSTRG. 32869.1 | -0.619724 | noncoding |
| MSTRG. 32880.1 | -1.85793  | noncoding |
| MSTRG. 32884.1 | -0.032847 | noncoding |
| MSTRG. 32888.1 | -1.25374  | noncoding |
| MSTRG. 32889.4 | 0.44676   | coding    |
| MSTRG. 32889.3 | 0.656533  | coding    |
| MSTRG. 32889.6 | 0.151331  | coding    |
| MSTRG. 32889.5 | 0.581462  | coding    |

|                |           |           |
|----------------|-----------|-----------|
| MSTRG. 32889.7 | 0.711618  | coding    |
| MSTRG. 32889.8 | 0.542561  | coding    |
| MSTRG. 32889.9 | -0.10927  | noncoding |
| MSTRG. 32892.1 | 2.46359   | coding    |
| MSTRG. 32892.5 | 0.235553  | coding    |
| MSTRG. 32893.4 | 1.47628   | coding    |
| MSTRG. 32895.3 | 0.614054  | coding    |
| MSTRG. 32897.1 | -2.05436  | noncoding |
| MSTRG. 32899.1 | -2.03039  | noncoding |
| MSTRG. 32906.3 | 0.748621  | coding    |
| MSTRG. 32906.4 | 1.00568   | coding    |
| MSTRG. 32906.6 | 0.653296  | coding    |
| MSTRG. 32906.5 | 1.40017   | coding    |
| MSTRG. 32907.1 | -1.82241  | noncoding |
| MSTRG. 32916.1 | 0.026034  | coding    |
| MSTRG. 32921.1 | -0.233287 | noncoding |
| MSTRG. 32922.2 | 1.15322   | coding    |
| MSTRG. 32922.4 | 1.22072   | coding    |
| MSTRG. 32925.1 | -2.20167  | noncoding |
| MSTRG. 32925.2 | 0.859027  | coding    |
| MSTRG. 32927.1 | 0.674718  | coding    |
| MSTRG. 32929.1 | 1.06262   | coding    |
| MSTRG. 32930.2 | 1.9472    | coding    |
| MSTRG. 32933.1 | -0.289567 | noncoding |
| MSTRG. 32936.6 | -0.136644 | noncoding |
| MSTRG. 32936.7 | 0.180581  | coding    |
| MSTRG. 32936.8 | 0.109082  | coding    |
| MSTRG. 32936.9 | 0.082486  | coding    |
| MSTRG. 32934.2 | -0.525324 | noncoding |
| MSTRG. 32934.3 | -0.041225 | noncoding |
| MSTRG. 32934.4 | -0.400562 | noncoding |
| MSTRG. 32934.5 | -0.338675 | noncoding |
| MSTRG. 32935.1 | -0.338313 | noncoding |
| MSTRG. 32937.2 | 0.012403  | coding    |
| MSTRG. 32939.2 | 2.80532   | coding    |
| MSTRG. 32943.1 | -2.08779  | noncoding |
| MSTRG. 32945.2 | -0.300934 | noncoding |
| MSTRG. 32946.1 | -0.276353 | noncoding |
| MSTRG. 32951.4 | 1.83908   | coding    |
| MSTRG. 32953.1 | 2.35201   | coding    |
| MSTRG. 32957.5 | 1.63094   | coding    |
| MSTRG. 32957.3 | 1.66361   | coding    |
| MSTRG. 32954.2 | 0.961097  | coding    |
| MSTRG. 32961.2 | 2.14068   | coding    |
| MSTRG. 32964.1 | 2.18635   | coding    |
| MSTRG. 32968.2 | 1.96976   | coding    |
| MSTRG. 32984.2 | 0.97425   | coding    |
| MSTRG. 32984.4 | 0.436563  | coding    |
| MSTRG. 32984.3 | 0.536343  | coding    |
| MSTRG. 32984.5 | 0.99766   | coding    |
| MSTRG. 32981.1 | 0.144118  | coding    |
| MSTRG. 32988.1 | -1.9542   | noncoding |
| MSTRG. 32992.1 | -2.53255  | noncoding |
| MSTRG. 33013.3 | 1.48771   | coding    |

|                |           |           |
|----------------|-----------|-----------|
| MSTRG. 33013.4 | 0.980591  | coding    |
| MSTRG. 33014.1 | 1.05475   | coding    |
| MSTRG. 33018.1 | -0.850269 | noncoding |
| MSTRG. 33003.1 | -2.19076  | noncoding |
| MSTRG. 33021.1 | 1.7241    | coding    |
| MSTRG. 33021.2 | 2.32886   | coding    |
| MSTRG. 33021.3 | 1.2908    | coding    |
| MSTRG. 33023.1 | -0.019789 | noncoding |
| MSTRG. 33024.1 | -2.13725  | noncoding |
| MSTRG. 33025.1 | -1.01097  | noncoding |
| MSTRG. 33031.5 | 0.717702  | coding    |
| MSTRG. 33031.6 | 0.169789  | coding    |
| MSTRG. 33033.2 | 1.45902   | coding    |
| MSTRG. 33036.1 | -1.00083  | noncoding |
| MSTRG. 33036.3 | 0.128257  | coding    |
| MSTRG. 33050.3 | -1.16621  | noncoding |
| MSTRG. 33050.2 | -0.897911 | noncoding |
| MSTRG. 33050.5 | -1.2126   | noncoding |
| MSTRG. 33054.1 | 0.262594  | coding    |
| MSTRG. 33056.1 | 0.401845  | coding    |
| MSTRG. 33063.2 | 1.32761   | coding    |
| MSTRG. 33063.3 | 0.90654   | coding    |
| MSTRG. 33068.1 | -0.467957 | noncoding |
| MSTRG. 33069.1 | 1.00214   | coding    |
| MSTRG. 33083.6 | 0.49493   | coding    |
| MSTRG. 33088.1 | 0.482312  | coding    |
| MSTRG. 33090.2 | 0.42843   | coding    |
| MSTRG. 33090.3 | -1.00497  | noncoding |
| MSTRG. 33097.2 | 0.187096  | coding    |
| MSTRG. 33101.1 | 1.69612   | coding    |
| MSTRG. 33102.5 | 1.12728   | coding    |
| MSTRG. 33102.4 | 1.37784   | coding    |
| MSTRG. 33102.6 | 1.5814    | coding    |
| MSTRG. 33114.1 | 2.23429   | coding    |
| MSTRG. 33114.2 | 2.23429   | coding    |
| MSTRG. 33114.3 | -1.14569  | noncoding |
| MSTRG. 33114.4 | 2.29136   | coding    |
| MSTRG. 33114.5 | 2.38245   | coding    |
| MSTRG. 33114.6 | 2.25965   | coding    |
| MSTRG. 33114.7 | 2.12606   | coding    |
| MSTRG. 33114.8 | 1.96346   | coding    |
| MSTRG. 33114.9 | 2.03776   | coding    |
| MSTRG. 33109.1 | -2.55568  | noncoding |
| MSTRG. 33108.3 | -0.195396 | noncoding |
| MSTRG. 33120.2 | 0.483837  | coding    |
| MSTRG. 33124.3 | -0.013311 | noncoding |
| MSTRG. 33124.1 | -0.345297 | noncoding |
| MSTRG. 33127.4 | 0.903092  | coding    |
| MSTRG. 33127.5 | 1.30126   | coding    |
| MSTRG. 33128.1 | 1.83583   | coding    |
| MSTRG. 33131.1 | -0.609402 | noncoding |
| MSTRG. 33132.1 | -0.430656 | noncoding |
| MSTRG. 33131.2 | -0.832752 | noncoding |
| MSTRG. 33131.4 | -0.476301 | noncoding |



|                |           |           |
|----------------|-----------|-----------|
| MSTRG. 33133.1 | -1.11645  | noncoding |
| MSTRG. 33129.2 | -0.0191   | noncoding |
| MSTRG. 33135.1 | 0.320396  | coding    |
| MSTRG. 33138.2 | 0.207853  | coding    |
| MSTRG. 33141.2 | 0.555083  | coding    |
| MSTRG. 33144.1 | 0.629306  | coding    |
| MSTRG. 33144.2 | 0.484977  | coding    |
| MSTRG. 33150.2 | 0.111824  | coding    |
| MSTRG. 33151.1 | 0.299433  | coding    |
| MSTRG. 33148.1 | 0.962088  | coding    |
| MSTRG. 33155.2 | -1.151    | noncoding |
| MSTRG. 33158.1 | 1.18856   | coding    |
| MSTRG. 33161.1 | 2.24787   | coding    |
| MSTRG. 33161.2 | 1.54652   | coding    |
| MSTRG. 33161.3 | 1.81637   | coding    |
| MSTRG. 33164.1 | -0.577086 | noncoding |
| MSTRG. 33165.1 | -0.577086 | noncoding |
| MSTRG. 33166.1 | -0.471143 | noncoding |
| MSTRG. 33166.2 | -0.324146 | noncoding |
| MSTRG. 33168.1 | -2.16856  | noncoding |
| MSTRG. 33172.1 | -2.41895  | noncoding |
| MSTRG. 33179.1 | 0.092464  | coding    |
| MSTRG. 33189.1 | -2.4446   | noncoding |
| MSTRG. 33224.2 | 1.51722   | coding    |
| MSTRG. 33224.3 | 1.58822   | coding    |
| MSTRG. 33223.1 | -2.06729  | noncoding |
| MSTRG. 33234.1 | -2.0396   | noncoding |
| MSTRG. 33248.1 | -0.907814 | noncoding |
| MSTRG. 33249.1 | -1.19931  | noncoding |
| MSTRG. 33245.1 | 0.964969  | coding    |
| MSTRG. 33278.2 | 0.785486  | coding    |
| MSTRG. 33280.1 | 0.999306  | coding    |
| MSTRG. 33282.4 | 1.75413   | coding    |
| MSTRG. 33284.1 | 2.43545   | coding    |
| MSTRG. 33287.3 | 0.548296  | coding    |
| MSTRG. 33301.2 | 2.67425   | coding    |
| MSTRG. 33306.3 | 0.543887  | coding    |
| MSTRG. 33309.1 | 0.901506  | coding    |
| MSTRG. 33309.3 | 2.84157   | coding    |
| MSTRG. 33319.1 | -1.92633  | noncoding |
| MSTRG. 33322.3 | 0.792534  | coding    |
| MSTRG. 33322.4 | 0.820154  | coding    |
| MSTRG. 33322.5 | -0.148038 | noncoding |
| MSTRG. 33323.1 | -0.260489 | noncoding |
| MSTRG. 33325.2 | 2.15535   | coding    |
| MSTRG. 33325.4 | 2.36791   | coding    |
| MSTRG. 33325.5 | 2.21919   | coding    |
| MSTRG. 33333.1 | 1.08983   | coding    |
| MSTRG. 33333.2 | 1.74326   | coding    |
| MSTRG. 33333.5 | 1.02288   | coding    |
| MSTRG. 33333.4 | 0.35902   | coding    |
| MSTRG. 33328.1 | 0.723444  | coding    |
| MSTRG. 33329.1 | 1.46173   | coding    |
| MSTRG. 33329.2 | 1.60883   | coding    |

|                 |           |           |
|-----------------|-----------|-----------|
| MSTRG. 33329.4  | 1.63246   | coding    |
| MSTRG. 33329.5  | 0.237852  | coding    |
| MSTRG. 33338.1  | 0.836941  | coding    |
| MSTRG. 33338.3  | -0.664238 | noncoding |
| MSTRG. 33339.1  | -2.31744  | noncoding |
| MSTRG. 33348.1  | -2.15355  | noncoding |
| MSTRG. 33367.7  | 2.06768   | coding    |
| MSTRG. 33373.2  | 2.35498   | coding    |
| MSTRG. 33373.3  | 2.24851   | coding    |
| MSTRG. 33373.5  | 1.80629   | coding    |
| MSTRG. 33373.4  | 2.14345   | coding    |
| MSTRG. 33373.8  | 2.02372   | coding    |
| MSTRG. 33374.1  | -1.88636  | noncoding |
| MSTRG. 33369.2  | 0.406515  | coding    |
| MSTRG. 33369.3  | 0.337405  | coding    |
| MSTRG. 33376.1  | -0.42798  | noncoding |
| MSTRG. 33386.1  | -1.22746  | noncoding |
| MSTRG. 33388.1  | -1.78789  | noncoding |
| MSTRG. 33389.2  | 1.88416   | coding    |
| MSTRG. 33391.1  | 1.80253   | coding    |
| MSTRG. 33398.2  | 2.12594   | coding    |
| MSTRG. 33398.1  | 1.95421   | coding    |
| MSTRG. 33400.2  | 0.256691  | coding    |
| MSTRG. 33400.1  | 0.24255   | coding    |
| MSTRG. 33400.5  | 0.014001  | coding    |
| MSTRG. 33403.5  | 0.958372  | coding    |
| MSTRG. 33404.1  | -1.28526  | noncoding |
| MSTRG. 33405.2  | 1.32284   | coding    |
| MSTRG. 33405.3  | 1.04653   | coding    |
| MSTRG. 33417.1  | -1.86158  | noncoding |
| MSTRG. 33419.13 | -0.918602 | noncoding |
| MSTRG. 33419.20 | -0.604432 | noncoding |
| MSTRG. 33419.23 | -0.543147 | noncoding |
| MSTRG. 33419.24 | -0.498601 | noncoding |
| MSTRG. 33408.3  | 1.74333   | coding    |
| MSTRG. 33423.3  | 2.09148   | coding    |
| MSTRG. 33423.4  | 2.30013   | coding    |
| MSTRG. 33424.1  | 2.05536   | coding    |
| MSTRG. 33424.2  | 2.0909    | coding    |
| MSTRG. 33424.3  | 1.94344   | coding    |
| MSTRG. 33443.13 | 2.46663   | coding    |
| MSTRG. 33443.9  | 2.26424   | coding    |
| MSTRG. 33443.3  | 2.2344    | coding    |
| MSTRG. 33443.11 | 2.35378   | coding    |
| MSTRG. 33443.14 | 2.29517   | coding    |
| MSTRG. 33443.6  | 2.31424   | coding    |
| MSTRG. 33443.5  | 2.28337   | coding    |
| MSTRG. 33443.15 | 1.5244    | coding    |
| MSTRG. 33448.8  | 1.78654   | coding    |
| MSTRG. 33450.1  | 1.44962   | coding    |
| MSTRG. 33451.1  | 0.142323  | coding    |
| MSTRG. 33452.1  | -0.535298 | noncoding |
| MSTRG. 33453.1  | 2.34535   | coding    |
| MSTRG. 33453.2  | 2.36149   | coding    |

|                |           |           |
|----------------|-----------|-----------|
| MSTRG. 33453.3 | 2.36859   | coding    |
| MSTRG. 33453.4 | 2.39453   | coding    |
| MSTRG. 33453.5 | 2.38328   | coding    |
| MSTRG. 33453.6 | 2.23038   | coding    |
| MSTRG. 33430.1 | -2.09257  | noncoding |
| MSTRG. 33439.2 | 2.6432    | coding    |
| MSTRG. 33439.3 | 1.62848   | coding    |
| MSTRG. 33444.1 | -1.24375  | noncoding |
| MSTRG. 33466.2 | 0.702503  | coding    |
| MSTRG. 33467.1 | -2.3414   | noncoding |
| MSTRG. 33482.1 | 1.87975   | coding    |
| MSTRG. 33482.3 | 1.6304    | coding    |
| MSTRG. 33483.1 | -1.00596  | noncoding |
| MSTRG. 33482.5 | 2.21418   | coding    |
| MSTRG. 33482.6 | 1.61748   | coding    |
| MSTRG. 33482.7 | 1.70203   | coding    |
| MSTRG. 33482.8 | 1.4555    | coding    |
| MSTRG. 33519.1 | 0.897598  | coding    |
| MSTRG. 33521.1 | 1.5827    | coding    |
| MSTRG. 33525.1 | -1.19745  | noncoding |
| MSTRG. 33534.1 | -1.13397  | noncoding |
| MSTRG. 33534.2 | -1.42784  | noncoding |
| MSTRG. 33535.4 | 0.916642  | coding    |
| MSTRG. 33535.5 | 1.6643    | coding    |
| MSTRG. 33535.6 | 1.5767    | coding    |
| MSTRG. 33536.1 | -0.818794 | noncoding |
| MSTRG. 33535.7 | 1.41655   | coding    |
| MSTRG. 33537.1 | -0.102964 | noncoding |
| MSTRG. 33535.8 | -0.682825 | noncoding |
| MSTRG. 33535.9 | 1.13198   | coding    |
| MSTRG. 33546.1 | 2.23787   | coding    |
| MSTRG. 33546.3 | 2.28024   | coding    |
| MSTRG. 33548.4 | 2.59615   | coding    |
| MSTRG. 33553.1 | 1.8684    | coding    |
| MSTRG. 33553.2 | 1.91337   | coding    |
| MSTRG. 33553.3 | 1.9349    | coding    |
| MSTRG. 33555.1 | -0.638422 | noncoding |
| MSTRG. 33553.8 | 1.99641   | coding    |
| MSTRG. 33550.2 | 0.607527  | coding    |
| MSTRG. 33559.4 | 1.13954   | coding    |
| MSTRG. 33568.1 | -2.75143  | noncoding |
| MSTRG. 33573.1 | 0.977696  | coding    |
| MSTRG. 33577.2 | 0.358701  | coding    |
| MSTRG. 33577.1 | 0.873167  | coding    |
| MSTRG. 33587.3 | -1.98804  | noncoding |
| MSTRG. 33609.2 | 1.66276   | coding    |
| MSTRG. 33614.1 | 1.56681   | coding    |
| MSTRG. 33613.2 | 0.132661  | coding    |
| MSTRG. 33619.1 | 0.720447  | coding    |
| MSTRG. 33619.2 | 0.444362  | coding    |
| MSTRG. 33627.2 | 0.698966  | coding    |
| MSTRG. 33629.2 | 2.80447   | coding    |
| MSTRG. 33629.1 | 2.21051   | coding    |
| MSTRG. 33629.4 | 2.30006   | coding    |

|                 |           |           |
|-----------------|-----------|-----------|
| MSTRG. 33629.6  | 2.25396   | coding    |
| MSTRG. 33629.3  | 2.11738   | coding    |
| MSTRG. 33629.5  | 2.27118   | coding    |
| MSTRG. 33629.7  | 2.17214   | coding    |
| MSTRG. 33629.10 | 2.18358   | coding    |
| MSTRG. 33629.8  | 2.27284   | coding    |
| MSTRG. 33629.9  | 2.15493   | coding    |
| MSTRG. 33629.11 | 2.13143   | coding    |
| MSTRG. 33634.2  | 3.07618   | coding    |
| MSTRG. 33634.4  | 1.05878   | coding    |
| MSTRG. 33639.6  | 0.922565  | coding    |
| MSTRG. 33639.7  | 1.22184   | coding    |
| MSTRG. 33648.2  | 0.25042   | coding    |
| MSTRG. 33648.5  | 0.489507  | coding    |
| MSTRG. 33649.1  | 0.916909  | coding    |
| MSTRG. 33649.3  | 0.93077   | coding    |
| MSTRG. 33654.2  | 1.43371   | coding    |
| MSTRG. 33658.1  | 0.964166  | coding    |
| MSTRG. 33662.3  | 1.39962   | coding    |
| MSTRG. 33662.4  | 1.22741   | coding    |
| MSTRG. 33661.1  | 0.615808  | coding    |
| MSTRG. 33664.6  | 2.05357   | coding    |
| MSTRG. 33664.2  | 2.42819   | coding    |
| MSTRG. 33664.3  | 2.34127   | coding    |
| MSTRG. 33664.4  | 2.33066   | coding    |
| MSTRG. 33664.7  | 2.33765   | coding    |
| MSTRG. 33664.8  | 2.00028   | coding    |
| MSTRG. 33664.9  | 1.96115   | coding    |
| MSTRG. 33664.10 | -0.058853 | noncoding |
| MSTRG. 33666.1  | -0.490963 | noncoding |
| MSTRG. 33669.2  | -0.228838 | noncoding |
| MSTRG. 33669.1  | 0.798257  | coding    |
| MSTRG. 33670.2  | 2.09506   | coding    |
| MSTRG. 33676.1  | 1.74973   | coding    |
| MSTRG. 33676.2  | 1.70259   | coding    |
| MSTRG. 33676.3  | 1.19887   | coding    |
| MSTRG. 33679.1  | -1.29854  | noncoding |
| MSTRG. 33679.2  | -1.42469  | noncoding |
| MSTRG. 33681.1  | 1.52282   | coding    |
| MSTRG. 33682.1  | -1.82617  | noncoding |
| MSTRG. 33683.1  | 0.674257  | coding    |
| MSTRG. 33683.2  | 0.306728  | coding    |
| MSTRG. 33683.3  | -0.09505  | noncoding |
| MSTRG. 33686.2  | 1.06545   | coding    |
| MSTRG. 33687.3  | 1.14534   | coding    |
| MSTRG. 33688.2  | 1.47132   | coding    |
| MSTRG. 33690.1  | -0.028436 | noncoding |
| MSTRG. 33690.2  | -0.36001  | noncoding |
| MSTRG. 33692.1  | 0.139029  | coding    |
| MSTRG. 33692.2  | 0.143431  | coding    |
| MSTRG. 33692.3  | 0.617493  | coding    |
| MSTRG. 33709.1  | 0.845225  | coding    |
| MSTRG. 33709.2  | 0.951524  | coding    |
| MSTRG. 33709.3  | 0.833047  | coding    |

|                |           |           |
|----------------|-----------|-----------|
| MSTRG. 33709.4 | 0.718532  | coding    |
| MSTRG. 33709.5 | 0.915483  | coding    |
| MSTRG. 33709.6 | 0.836146  | coding    |
| MSTRG. 33712.1 | -0.724586 | noncoding |
| MSTRG. 33712.2 | 0.899846  | coding    |
| MSTRG. 33713.1 | -0.277246 | noncoding |
| MSTRG. 33714.1 | 1.29767   | coding    |
| MSTRG. 33729.1 | 1.72974   | coding    |
| MSTRG. 33731.1 | 0.96632   | coding    |
| MSTRG. 33744.3 | 0.743882  | coding    |
| MSTRG. 33754.2 | -1.20877  | noncoding |
| MSTRG. 33754.1 | -1.51974  | noncoding |
| MSTRG. 33754.4 | -1.56321  | noncoding |
| MSTRG. 33754.5 | -1.56321  | noncoding |
| MSTRG. 33754.3 | -1.30637  | noncoding |
| MSTRG. 33754.6 | -1.71193  | noncoding |
| MSTRG. 33756.2 | 2.8684    | coding    |
| MSTRG. 33760.1 | -1.9033   | noncoding |
| MSTRG. 33760.2 | -1.64518  | noncoding |
| MSTRG. 33764.1 | -0.41285  | noncoding |
| MSTRG. 33758.1 | -1.5484   | noncoding |
| MSTRG. 33768.1 | 1.70176   | coding    |
| MSTRG. 33768.2 | 1.11801   | coding    |
| MSTRG. 33768.3 | 0.550427  | coding    |
| MSTRG. 33768.4 | 1.87683   | coding    |
| MSTRG. 33769.1 | -0.084925 | noncoding |
| MSTRG. 33770.1 | 0.39147   | coding    |
| MSTRG. 33768.5 | 0.48978   | coding    |
| MSTRG. 33768.6 | 0.964586  | coding    |
| MSTRG. 33771.1 | 0.596849  | coding    |
| MSTRG. 33772.1 | -0.661485 | noncoding |
| MSTRG. 33773.1 | 0.253973  | coding    |
| MSTRG. 33787.1 | -1.22383  | noncoding |
| MSTRG. 33789.1 | -0.928968 | noncoding |
| MSTRG. 33792.1 | -2.07985  | noncoding |
| MSTRG. 33793.1 | -0.439104 | noncoding |
| MSTRG. 33791.1 | -0.746603 | noncoding |
| MSTRG. 33813.2 | 2.06021   | coding    |
| MSTRG. 33813.4 | 2.02768   | coding    |
| MSTRG. 33813.5 | 1.50113   | coding    |
| MSTRG. 33813.6 | 1.55596   | coding    |
| MSTRG. 33815.1 | 0.761627  | coding    |
| MSTRG. 33817.1 | -0.920956 | noncoding |
| MSTRG. 33819.2 | 0.792008  | coding    |
| MSTRG. 33820.1 | 0.441593  | coding    |
| MSTRG. 33820.2 | 0.488796  | coding    |
| MSTRG. 33820.4 | 0.532094  | coding    |
| MSTRG. 33822.1 | -1.42079  | noncoding |
| MSTRG. 33824.1 | -1.81813  | noncoding |
| MSTRG. 33817.2 | 2.73022   | coding    |
| MSTRG. 33817.4 | 0.200066  | coding    |
| MSTRG. 33804.1 | -2.21702  | noncoding |
| MSTRG. 33803.1 | -2.32637  | noncoding |
| MSTRG. 33805.1 | -2.32819  | noncoding |

|                 |            |           |
|-----------------|------------|-----------|
| MSTRG. 33806. 1 | -2. 28652  | noncoding |
| MSTRG. 33806. 2 | -2. 32327  | noncoding |
| MSTRG. 33809. 1 | -2. 25945  | noncoding |
| MSTRG. 33810. 1 | -2. 32135  | noncoding |
| MSTRG. 33811. 1 | -2. 36129  | noncoding |
| MSTRG. 33812. 1 | -2. 38646  | noncoding |
| MSTRG. 33812. 2 | -2. 26564  | noncoding |
| MSTRG. 33846. 1 | 0. 281109  | coding    |
| MSTRG. 33829. 1 | -1. 30741  | noncoding |
| MSTRG. 33831. 1 | -1. 39376  | noncoding |
| MSTRG. 33831. 2 | -1. 41591  | noncoding |
| MSTRG. 33831. 3 | -1. 80627  | noncoding |
| MSTRG. 33831. 4 | -1. 38879  | noncoding |
| MSTRG. 33832. 1 | 0. 213131  | coding    |
| MSTRG. 33832. 2 | 0. 130774  | coding    |
| MSTRG. 33838. 1 | -2. 13779  | noncoding |
| MSTRG. 33839. 1 | -2. 14478  | noncoding |
| MSTRG. 33839. 2 | -2. 27513  | noncoding |
| MSTRG. 33841. 1 | -0. 25914  | noncoding |
| MSTRG. 33843. 1 | 0. 222624  | coding    |
| MSTRG. 33851. 1 | -1. 60927  | noncoding |
| MSTRG. 33852. 1 | -1. 49562  | noncoding |
| MSTRG. 33858. 1 | -2. 34608  | noncoding |
| MSTRG. 33860. 1 | -2. 38913  | noncoding |
| MSTRG. 33861. 1 | -2. 44074  | noncoding |
| MSTRG. 33863. 1 | -2. 4749   | noncoding |
| MSTRG. 33865. 1 | -1. 74872  | noncoding |
| MSTRG. 33868. 1 | -0. 490526 | noncoding |
| MSTRG. 33868. 2 | -0. 932697 | noncoding |
| MSTRG. 33869. 1 | -2. 33283  | noncoding |
| MSTRG. 33869. 2 | -2. 29851  | noncoding |
| MSTRG. 33875. 1 | 0. 580758  | coding    |
| MSTRG. 33875. 2 | 0. 209541  | coding    |
| MSTRG. 33875. 4 | 0. 728973  | coding    |
| MSTRG. 33875. 6 | -0. 231654 | noncoding |
| MSTRG. 33874. 1 | -0. 946927 | noncoding |
| MSTRG. 33879. 1 | -0. 925372 | noncoding |
| MSTRG. 33882. 1 | 1. 87589   | coding    |
| MSTRG. 33883. 1 | -2. 17051  | noncoding |
| MSTRG. 33886. 1 | -1. 50155  | noncoding |
| MSTRG. 33880. 1 | -0. 466939 | noncoding |
| MSTRG. 33881. 1 | -2. 28092  | noncoding |
| MSTRG. 33896. 2 | -0. 497861 | noncoding |
| MSTRG. 33896. 3 | -0. 597672 | noncoding |
| MSTRG. 33896. 1 | -0. 508556 | noncoding |
| MSTRG. 33896. 4 | -0. 121622 | noncoding |
| MSTRG. 33896. 5 | 0. 088955  | coding    |
| MSTRG. 33896. 6 | -0. 425472 | noncoding |
| MSTRG. 33894. 2 | -0. 467253 | noncoding |
| MSTRG. 33898. 1 | -1. 94932  | noncoding |
| MSTRG. 33898. 2 | -1. 94932  | noncoding |
| MSTRG. 33898. 3 | -0. 334938 | noncoding |
| MSTRG. 33898. 4 | -2. 2055   | noncoding |
| MSTRG. 33898. 5 | -0. 915087 | noncoding |

|                 |           |           |
|-----------------|-----------|-----------|
| MSTRG. 33898.6  | -0.908046 | noncoding |
| MSTRG. 33899.1  | -1.33157  | noncoding |
| MSTRG. 33899.2  | -0.874595 | noncoding |
| MSTRG. 33899.3  | -0.872248 | noncoding |
| MSTRG. 33899.4  | -0.872248 | noncoding |
| MSTRG. 33898.7  | -1.73587  | noncoding |
| MSTRG. 33901.1  | -1.86455  | noncoding |
| MSTRG. 33901.2  | -1.94159  | noncoding |
| MSTRG. 33901.3  | -1.85015  | noncoding |
| MSTRG. 33901.4  | -1.63202  | noncoding |
| MSTRG. 33901.5  | -1.72537  | noncoding |
| MSTRG. 33901.6  | -1.84762  | noncoding |
| MSTRG. 33901.7  | -2.50603  | noncoding |
| MSTRG. 33901.8  | -2.27832  | noncoding |
| MSTRG. 33901.9  | -1.76242  | noncoding |
| MSTRG. 33903.1  | 0.99684   | coding    |
| MSTRG. 33910.1  | -2.32614  | noncoding |
| MSTRG. 33910.2  | -2.32516  | noncoding |
| MSTRG. 33914.2  | 0.794912  | coding    |
| MSTRG. 33914.1  | 0.67868   | coding    |
| MSTRG. 33914.3  | 0.810087  | coding    |
| MSTRG. 33917.1  | -1.61262  | noncoding |
| MSTRG. 33911.1  | -2.30909  | noncoding |
| MSTRG. 33920.2  | 0.048143  | coding    |
| MSTRG. 33920.3  | -0.079005 | noncoding |
| MSTRG. 33921.2  | -0.544953 | noncoding |
| MSTRG. 33921.3  | -0.71947  | noncoding |
| MSTRG. 33922.1  | -1.24672  | noncoding |
| MSTRG. 33922.2  | -1.94916  | noncoding |
| MSTRG. 33949.1  | -1.09995  | noncoding |
| MSTRG. 33949.2  | -2.06036  | noncoding |
| MSTRG. 33949.3  | -0.865878 | noncoding |
| MSTRG. 33950.2  | 0.302846  | coding    |
| MSTRG. 33950.5  | 0.350743  | coding    |
| MSTRG. 33950.6  | 0.258034  | coding    |
| MSTRG. 33950.7  | 0.257273  | coding    |
| MSTRG. 33950.12 | -0.786077 | noncoding |
| MSTRG. 33950.10 | 0.365348  | coding    |
| MSTRG. 33950.13 | 0.644543  | coding    |
| MSTRG. 33950.14 | 0.711204  | coding    |
| MSTRG. 33950.9  | 0.696798  | coding    |
| MSTRG. 33950.11 | 0.241128  | coding    |
| MSTRG. 33950.15 | -0.354375 | noncoding |
| MSTRG. 33950.17 | -0.612996 | noncoding |
| MSTRG. 33950.19 | -0.815366 | noncoding |
| MSTRG. 33953.1  | 1.13257   | coding    |
| MSTRG. 33931.1  | -1.34135  | noncoding |
| MSTRG. 33932.1  | -1.93045  | noncoding |
| MSTRG. 33931.2  | -1.69729  | noncoding |
| MSTRG. 33933.1  | -1.50689  | noncoding |
| MSTRG. 33934.1  | -2.65287  | noncoding |
| MSTRG. 33928.1  | -1.66901  | noncoding |
| MSTRG. 33929.1  | -0.554273 | noncoding |
| MSTRG. 33935.1  | -1.02894  | noncoding |

|                 |           |           |
|-----------------|-----------|-----------|
| MSTRG. 33941.2  | -0.439462 | noncoding |
| MSTRG. 33944.1  | -1.9862   | noncoding |
| MSTRG. 33946.1  | -2.24658  | noncoding |
| MSTRG. 33946.2  | -2.24658  | noncoding |
| MSTRG. 33946.3  | -2.28808  | noncoding |
| MSTRG. 33947.1  | -2.24406  | noncoding |
| MSTRG. 33960.1  | 0.147167  | coding    |
| MSTRG. 33960.2  | 0.87234   | coding    |
| MSTRG. 33960.7  | -0.600753 | noncoding |
| MSTRG. 33960.8  | -0.368256 | noncoding |
| MSTRG. 33960.9  | 0.707457  | coding    |
| MSTRG. 33960.10 | 0.162493  | coding    |
| MSTRG. 33960.11 | 0.116832  | coding    |
| MSTRG. 33963.1  | -1.84781  | noncoding |
| MSTRG. 33964.1  | -1.27086  | noncoding |
| MSTRG. 33965.1  | -1.25072  | noncoding |
| MSTRG. 33965.2  | -2.37105  | noncoding |
| MSTRG. 33966.1  | -2.46638  | noncoding |
| MSTRG. 33962.1  | -2.28152  | noncoding |
| MSTRG. 33962.2  | -2.2881   | noncoding |
| MSTRG. 33967.1  | -2.14278  | noncoding |
| MSTRG. 33985.4  | 0.329866  | coding    |
| MSTRG. 33985.7  | 0.151147  | coding    |
| MSTRG. 33985.10 | 0.178766  | coding    |
| MSTRG. 33985.9  | 0.928077  | coding    |
| MSTRG. 33985.11 | 0.154028  | coding    |
| MSTRG. 33979.1  | -2.35932  | noncoding |
| MSTRG. 33986.1  | -1.4659   | noncoding |
| MSTRG. 33986.2  | -1.69453  | noncoding |
| MSTRG. 33986.3  | -1.93767  | noncoding |
| MSTRG. 33986.4  | -1.72448  | noncoding |
| MSTRG. 33987.1  | -2.07734  | noncoding |
| MSTRG. 33986.5  | -1.68535  | noncoding |
| MSTRG. 33992.1  | -2.47262  | noncoding |
| MSTRG. 33993.1  | -2.06333  | noncoding |
| MSTRG. 33993.2  | -2.08501  | noncoding |
| MSTRG. 33998.1  | -2.2806   | noncoding |
| MSTRG. 33999.1  | -2.32182  | noncoding |
| MSTRG. 34000.2  | -0.662141 | noncoding |
| MSTRG. 34000.3  | -0.220483 | noncoding |
| MSTRG. 34000.1  | -0.603102 | noncoding |
| MSTRG. 34000.4  | -0.122196 | noncoding |
| MSTRG. 34000.5  | -0.122196 | noncoding |
| MSTRG. 34000.6  | -0.002016 | noncoding |
| MSTRG. 34016.1  | -2.20137  | noncoding |
| MSTRG. 34016.2  | -2.1217   | noncoding |
| MSTRG. 34016.4  | -2.30638  | noncoding |
| MSTRG. 34016.5  | -0.612433 | noncoding |
| MSTRG. 34016.6  | -0.612433 | noncoding |
| MSTRG. 34016.3  | -0.859661 | noncoding |
| MSTRG. 34016.7  | -2.2979   | noncoding |
| MSTRG. 34016.8  | -2.38707  | noncoding |
| MSTRG. 34016.9  | -1.8473   | noncoding |
| MSTRG. 34016.10 | -1.05629  | noncoding |



|                  |           |           |
|------------------|-----------|-----------|
| MSTRG. 34016. 11 | -0.761317 | noncoding |
| MSTRG. 34016. 12 | -0.81799  | noncoding |
| MSTRG. 34016. 13 | -1.38273  | noncoding |
| MSTRG. 34016. 15 | -0.776819 | noncoding |
| MSTRG. 34016. 14 | -0.708367 | noncoding |
| MSTRG. 34016. 16 | -0.82042  | noncoding |
| MSTRG. 34016. 17 | -1.78388  | noncoding |
| MSTRG. 34016. 18 | -1.74873  | noncoding |
| MSTRG. 34012. 1  | 0.054583  | coding    |
| MSTRG. 34013. 1  | -1.94236  | noncoding |
| MSTRG. 34017. 1  | -1.90099  | noncoding |
| MSTRG. 34017. 3  | -2.39624  | noncoding |
| MSTRG. 34017. 2  | -1.16843  | noncoding |
| MSTRG. 34017. 4  | -1.91253  | noncoding |
| MSTRG. 34017. 5  | -0.911799 | noncoding |
| MSTRG. 34018. 1  | -1.49775  | noncoding |
| MSTRG. 34026. 2  | -1.74579  | noncoding |
| MSTRG. 34028. 1  | -1.39693  | noncoding |
| MSTRG. 34035. 1  | -0.510423 | noncoding |
| MSTRG. 34037. 1  | -2.21836  | noncoding |
| MSTRG. 34038. 1  | -1.84576  | noncoding |
| MSTRG. 34046. 1  | 1.49103   | coding    |
| MSTRG. 34046. 2  | 1.48861   | coding    |
| MSTRG. 34046. 3  | 1.41184   | coding    |
| MSTRG. 34046. 4  | 2.35548   | coding    |
| MSTRG. 34046. 5  | 1.10639   | coding    |
| MSTRG. 34046. 6  | 1.84173   | coding    |
| MSTRG. 34047. 2  | -1.05549  | noncoding |
| MSTRG. 34052. 1  | -1.54828  | noncoding |
| MSTRG. 34053. 1  | -1.45649  | noncoding |
| MSTRG. 34053. 2  | -1.61257  | noncoding |
| MSTRG. 34055. 1  | -0.509382 | noncoding |
| MSTRG. 34056. 2  | 0.214491  | coding    |
| MSTRG. 34066. 1  | 0.253552  | coding    |
| MSTRG. 34072. 1  | -2.32591  | noncoding |
| MSTRG. 34072. 2  | -2.32594  | noncoding |
| MSTRG. 34072. 3  | -2.32608  | noncoding |
| MSTRG. 34072. 4  | -2.32595  | noncoding |
| MSTRG. 34072. 5  | -2.326    | noncoding |
| MSTRG. 34088. 1  | -2.32636  | noncoding |
| MSTRG. 34090. 1  | -2.3263   | noncoding |
| MSTRG. 34088. 2  | -2.32639  | noncoding |
| MSTRG. 34084. 1  | -2.32628  | noncoding |
| MSTRG. 34085. 1  | -2.32638  | noncoding |
| MSTRG. 34093. 1  | -0.130367 | noncoding |
| MSTRG. 34094. 1  | 0.089943  | coding    |
| MSTRG. 34101. 1  | -1.01357  | noncoding |
| MSTRG. 34097. 1  | -2.44893  | noncoding |
| MSTRG. 34108. 2  | 0.084424  | coding    |
| MSTRG. 34110. 1  | -1.47832  | noncoding |
| MSTRG. 34110. 2  | -2.12196  | noncoding |
| MSTRG. 34129. 1  | -1.79842  | noncoding |
| MSTRG. 34130. 3  | -1.63014  | noncoding |
| MSTRG. 34130. 1  | -1.63245  | noncoding |

|                 |           |           |
|-----------------|-----------|-----------|
| MSTRG. 34130.2  | -1.63395  | noncoding |
| MSTRG. 34131.1  | -1.88013  | noncoding |
| MSTRG. 34131.2  | -1.99955  | noncoding |
| MSTRG. 34130.4  | -1.5778   | noncoding |
| MSTRG. 34130.5  | -1.63014  | noncoding |
| MSTRG. 34135.3  | -1.50226  | noncoding |
| MSTRG. 34135.1  | -1.41661  | noncoding |
| MSTRG. 34135.2  | -1.41661  | noncoding |
| MSTRG. 34135.4  | -1.37479  | noncoding |
| MSTRG. 34136.1  | -1.01294  | noncoding |
| MSTRG. 34135.5  | -1.69977  | noncoding |
| MSTRG. 34137.3  | -0.575558 | noncoding |
| MSTRG. 34137.1  | -0.544652 | noncoding |
| MSTRG. 34137.2  | -0.544652 | noncoding |
| MSTRG. 34135.6  | -1.77676  | noncoding |
| MSTRG. 34133.1  | -2.33476  | noncoding |
| MSTRG. 34146.1  | 1.58131   | coding    |
| MSTRG. 34149.1  | 0.154455  | coding    |
| MSTRG. 34152.1  | -0.799107 | noncoding |
| MSTRG. 34153.1  | -2.47525  | noncoding |
| MSTRG. 34185.7  | 0.588675  | coding    |
| MSTRG. 34185.8  | -0.888079 | noncoding |
| MSTRG. 34185.10 | -1.06191  | noncoding |
| MSTRG. 34185.9  | -0.962977 | noncoding |
| MSTRG. 34185.11 | -1.00091  | noncoding |
| MSTRG. 34185.12 | -1.04311  | noncoding |
| MSTRG. 34185.13 | -1.13434  | noncoding |
| MSTRG. 34185.15 | -0.451847 | noncoding |
| MSTRG. 34185.14 | -0.455512 | noncoding |
| MSTRG. 34185.16 | -1.00546  | noncoding |
| MSTRG. 34185.17 | -0.36194  | noncoding |
| MSTRG. 34185.18 | -0.35168  | noncoding |
| MSTRG. 34185.19 | -1.31132  | noncoding |
| MSTRG. 34185.20 | -0.584835 | noncoding |
| MSTRG. 34185.21 | -0.594183 | noncoding |
| MSTRG. 34185.22 | -0.430093 | noncoding |
| MSTRG. 34185.23 | -1.56583  | noncoding |
| MSTRG. 34154.1  | -2.07664  | noncoding |
| MSTRG. 34155.1  | -2.37887  | noncoding |
| MSTRG. 34154.2  | -2.1391   | noncoding |
| MSTRG. 34161.2  | 0.06161   | coding    |
| MSTRG. 34161.3  | -0.415768 | noncoding |
| MSTRG. 34159.1  | -1.74106  | noncoding |
| MSTRG. 34164.1  | -1.82975  | noncoding |
| MSTRG. 34164.2  | -1.04103  | noncoding |
| MSTRG. 34171.2  | 1.66245   | coding    |
| MSTRG. 34171.5  | 1.2023    | coding    |
| MSTRG. 34171.6  | 0.700948  | coding    |
| MSTRG. 34174.1  | -1.98734  | noncoding |
| MSTRG. 34178.1  | -0.926786 | noncoding |
| MSTRG. 34183.2  | 1.06729   | coding    |
| MSTRG. 34183.3  | 0.777724  | coding    |
| MSTRG. 34183.4  | -1.43129  | noncoding |
| MSTRG. 34190.1  | 1.47182   | coding    |

|                 |           |           |
|-----------------|-----------|-----------|
| MSTRG. 34190.2  | 1.52252   | coding    |
| MSTRG. 34190.6  | 1.8484    | coding    |
| MSTRG. 34190.9  | 1.57085   | coding    |
| MSTRG. 34169.1  | -2.18193  | noncoding |
| MSTRG. 34196.1  | -0.972427 | noncoding |
| MSTRG. 34198.3  | -0.522288 | noncoding |
| MSTRG. 34198.4  | -0.677223 | noncoding |
| MSTRG. 34206.1  | -1.05051  | noncoding |
| MSTRG. 34202.1  | 0.243957  | coding    |
| MSTRG. 34209.1  | -1.02256  | noncoding |
| MSTRG. 34209.2  | -1.12885  | noncoding |
| MSTRG. 34210.1  | -1.18279  | noncoding |
| MSTRG. 34210.2  | -1.46105  | noncoding |
| MSTRG. 34219.1  | -2.40512  | noncoding |
| MSTRG. 34220.1  | -2.25018  | noncoding |
| MSTRG. 34219.2  | -2.40512  | noncoding |
| MSTRG. 34220.2  | -2.25313  | noncoding |
| MSTRG. 34220.3  | -2.29994  | noncoding |
| MSTRG. 34219.3  | -2.41617  | noncoding |
| MSTRG. 34225.1  | -2.32806  | noncoding |
| MSTRG. 34226.1  | -2.38276  | noncoding |
| MSTRG. 34235.1  | -2.64641  | noncoding |
| MSTRG. 34238.1  | -1.62273  | noncoding |
| MSTRG. 34252.1  | -1.77434  | noncoding |
| MSTRG. 34252.2  | -1.86059  | noncoding |
| MSTRG. 34252.3  | -1.0341   | noncoding |
| MSTRG. 34252.4  | -1.0341   | noncoding |
| MSTRG. 34272.1  | -0.525333 | noncoding |
| MSTRG. 34272.2  | -0.442777 | noncoding |
| MSTRG. 34272.4  | -0.642857 | noncoding |
| MSTRG. 34272.3  | -0.844148 | noncoding |
| MSTRG. 34272.6  | -0.855802 | noncoding |
| MSTRG. 34272.5  | -0.655513 | noncoding |
| MSTRG. 34272.7  | -1.0446   | noncoding |
| MSTRG. 34272.8  | -0.876078 | noncoding |
| MSTRG. 34272.9  | -0.855098 | noncoding |
| MSTRG. 34293.1  | -3.58103  | noncoding |
| MSTRG. 34294.1  | -1.21843  | noncoding |
| MSTRG. 34294.2  | -0.962124 | noncoding |
| MSTRG. 34295.1  | -0.477313 | noncoding |
| MSTRG. 34295.2  | -0.19073  | noncoding |
| MSTRG. 34295.4  | -0.861253 | noncoding |
| MSTRG. 34295.3  | -0.470391 | noncoding |
| MSTRG. 34295.5  | -1.51254  | noncoding |
| MSTRG. 34294.3  | -0.612962 | noncoding |
| MSTRG. 34294.4  | -0.324697 | noncoding |
| MSTRG. 34294.6  | -0.509399 | noncoding |
| MSTRG. 34294.5  | -0.521106 | noncoding |
| MSTRG. 34295.6  | -0.260313 | noncoding |
| MSTRG. 34294.8  | -2.54865  | noncoding |
| MSTRG. 34294.7  | -0.506083 | noncoding |
| MSTRG. 34294.9  | -0.063731 | noncoding |
| MSTRG. 34295.7  | -2.43674  | noncoding |
| MSTRG. 34294.10 | -0.425231 | noncoding |

|                  |            |           |
|------------------|------------|-----------|
| MSTRG. 34294. 11 | -1. 1189   | noncoding |
| MSTRG. 34298. 1  | -2. 17639  | noncoding |
| MSTRG. 34298. 2  | -2. 22636  | noncoding |
| MSTRG. 34299. 1  | -1. 91669  | noncoding |
| MSTRG. 34282. 1  | -1. 55315  | noncoding |
| MSTRG. 34283. 1  | -2. 32616  | noncoding |
| MSTRG. 34284. 1  | -2. 12404  | noncoding |
| MSTRG. 34287. 1  | -2. 56757  | noncoding |
| MSTRG. 34300. 1  | -1. 94803  | noncoding |
| MSTRG. 34302. 1  | -1. 3469   | noncoding |
| MSTRG. 34303. 1  | -1. 60795  | noncoding |
| MSTRG. 34314. 1  | -1. 81355  | noncoding |
| MSTRG. 34314. 3  | -1. 1038   | noncoding |
| MSTRG. 34314. 4  | -0. 897054 | noncoding |
| MSTRG. 34314. 2  | -0. 767603 | noncoding |
| MSTRG. 34315. 1  | 0. 412795  | coding    |
| MSTRG. 34315. 2  | 0. 7576    | coding    |
| MSTRG. 34315. 3  | 0. 162234  | coding    |
| MSTRG. 34315. 4  | 0. 590224  | coding    |
| MSTRG. 34317. 2  | 0. 396339  | coding    |
| MSTRG. 34317. 3  | -0. 566208 | noncoding |
| MSTRG. 34315. 5  | 0. 440132  | coding    |
| MSTRG. 34315. 6  | 0. 021136  | coding    |
| MSTRG. 34315. 7  | -1. 21031  | noncoding |
| MSTRG. 34315. 8  | 0. 180104  | coding    |
| MSTRG. 34315. 10 | 0. 004939  | coding    |
| MSTRG. 34315. 11 | -0. 065857 | noncoding |
| MSTRG. 34315. 9  | -0. 084918 | noncoding |
| MSTRG. 34304. 1  | -2. 32414  | noncoding |
| MSTRG. 34305. 1  | -2. 45421  | noncoding |
| MSTRG. 34306. 2  | -2. 33123  | noncoding |
| MSTRG. 34306. 1  | -2. 32425  | noncoding |
| MSTRG. 34307. 1  | -2. 33032  | noncoding |
| MSTRG. 34307. 2  | -2. 32756  | noncoding |
| MSTRG. 34308. 1  | -2. 33523  | noncoding |
| MSTRG. 34321. 1  | -0. 108946 | noncoding |
| MSTRG. 34328. 1  | -2. 3141   | noncoding |
| MSTRG. 34330. 1  | -1. 99887  | noncoding |
| MSTRG. 34327. 1  | -0. 390972 | noncoding |
| MSTRG. 34334. 2  | -0. 941571 | noncoding |
| MSTRG. 34346. 1  | -1. 60427  | noncoding |
| MSTRG. 34346. 2  | -0. 372587 | noncoding |
| MSTRG. 34346. 3  | -1. 38784  | noncoding |
| MSTRG. 34346. 4  | -1. 38784  | noncoding |
| MSTRG. 34342. 1  | -1. 93856  | noncoding |
| MSTRG. 34342. 2  | -1. 93856  | noncoding |
| MSTRG. 34351. 1  | -1. 39329  | noncoding |
| MSTRG. 34351. 3  | -1. 95379  | noncoding |
| MSTRG. 34351. 2  | -1. 77538  | noncoding |
| MSTRG. 34351. 4  | -1. 68125  | noncoding |
| MSTRG. 34351. 5  | -1. 61748  | noncoding |
| MSTRG. 34351. 6  | -1. 66727  | noncoding |
| MSTRG. 34351. 7  | -1. 81694  | noncoding |
| MSTRG. 34351. 8  | -1. 76992  | noncoding |

|                  |            |           |
|------------------|------------|-----------|
| MSTRG. 34349. 1  | -1. 67123  | noncoding |
| MSTRG. 34352. 1  | -1. 38853  | noncoding |
| MSTRG. 34352. 2  | -1. 953    | noncoding |
| MSTRG. 34369. 1  | 1. 74778   | coding    |
| MSTRG. 34369. 2  | 1. 32369   | coding    |
| MSTRG. 34369. 3  | 0. 923292  | coding    |
| MSTRG. 34369. 4  | 1. 1267    | coding    |
| MSTRG. 34369. 5  | 1. 1077    | coding    |
| MSTRG. 34369. 7  | 1. 9258    | coding    |
| MSTRG. 34369. 8  | 2. 3188    | coding    |
| MSTRG. 34369. 9  | 0. 130987  | coding    |
| MSTRG. 34369. 10 | 1. 53847   | coding    |
| MSTRG. 34369. 11 | 1. 21899   | coding    |
| MSTRG. 34356. 1  | -2. 08025  | noncoding |
| MSTRG. 34356. 2  | -1. 58398  | noncoding |
| MSTRG. 34357. 1  | -1. 96376  | noncoding |
| MSTRG. 34355. 1  | 1. 01635   | coding    |
| MSTRG. 34363. 2  | 0. 684326  | coding    |
| MSTRG. 34363. 3  | 1. 56646   | coding    |
| MSTRG. 34365. 2  | 0. 695326  | coding    |
| MSTRG. 34365. 3  | -0. 216696 | noncoding |
| MSTRG. 34365. 4  | -2. 19774  | noncoding |
| MSTRG. 34361. 1  | -2. 21254  | noncoding |
| MSTRG. 34373. 1  | -2. 4541   | noncoding |
| MSTRG. 34373. 2  | -2. 50585  | noncoding |
| MSTRG. 34373. 3  | -2. 4541   | noncoding |
| MSTRG. 34374. 1  | -2. 47987  | noncoding |
| MSTRG. 34374. 2  | -2. 2356   | noncoding |
| MSTRG. 34374. 3  | -2. 39162  | noncoding |
| MSTRG. 34375. 1  | -0. 110391 | noncoding |
| MSTRG. 34375. 2  | -0. 136661 | noncoding |
| MSTRG. 34373. 4  | -1. 38333  | noncoding |
| MSTRG. 34373. 5  | -1. 38333  | noncoding |
| MSTRG. 34376. 5  | -0. 321512 | noncoding |
| MSTRG. 34376. 2  | -0. 775235 | noncoding |
| MSTRG. 34376. 4  | -0. 408971 | noncoding |
| MSTRG. 34376. 3  | -0. 433398 | noncoding |
| MSTRG. 34376. 6  | -0. 31165  | noncoding |
| MSTRG. 34376. 7  | -0. 363153 | noncoding |
| MSTRG. 34376. 1  | -0. 398249 | noncoding |
| MSTRG. 34383. 1  | -2. 31035  | noncoding |
| MSTRG. 34383. 2  | -2. 32699  | noncoding |
| MSTRG. 34383. 3  | -2. 26441  | noncoding |
| MSTRG. 34384. 1  | -2. 40719  | noncoding |
| MSTRG. 34389. 1  | -2. 12474  | noncoding |
| MSTRG. 34390. 1  | -1. 87493  | noncoding |
| MSTRG. 34391. 1  | -2. 17198  | noncoding |
| MSTRG. 34393. 1  | 0. 962565  | coding    |
| MSTRG. 34395. 2  | 1. 25928   | coding    |
| MSTRG. 34394. 1  | 0. 238253  | coding    |
| MSTRG. 34394. 3  | 0. 071386  | coding    |
| MSTRG. 34400. 1  | -1. 43069  | noncoding |
| MSTRG. 34401. 2  | -2. 46442  | noncoding |
| MSTRG. 34401. 1  | -2. 47426  | noncoding |

|                  |            |           |
|------------------|------------|-----------|
| MSTRG. 34402. 1  | -1. 71676  | noncoding |
| MSTRG. 34402. 2  | -1. 71676  | noncoding |
| MSTRG. 34401. 3  | -2. 02175  | noncoding |
| MSTRG. 34402. 3  | -1. 50499  | noncoding |
| MSTRG. 34400. 2  | -0. 306451 | noncoding |
| MSTRG. 34411. 1  | -1. 71726  | noncoding |
| MSTRG. 34414. 1  | 0. 091537  | coding    |
| MSTRG. 34414. 2  | -0. 352683 | noncoding |
| MSTRG. 34414. 3  | -0. 35936  | noncoding |
| MSTRG. 34416. 1  | -2. 35081  | noncoding |
| MSTRG. 34435. 10 | 0. 66927   | coding    |
| MSTRG. 34435. 7  | 0. 604485  | coding    |
| MSTRG. 34435. 8  | 0. 661153  | coding    |
| MSTRG. 34435. 9  | 0. 66927   | coding    |
| MSTRG. 34435. 2  | 0. 637702  | coding    |
| MSTRG. 34418. 1  | -2. 32632  | noncoding |
| MSTRG. 34420. 1  | -2. 23703  | noncoding |
| MSTRG. 34421. 1  | -2. 05197  | noncoding |
| MSTRG. 34422. 1  | -2. 32623  | noncoding |
| MSTRG. 34427. 1  | -1. 72039  | noncoding |
| MSTRG. 34427. 2  | -0. 99934  | noncoding |
| MSTRG. 34427. 3  | -1. 01446  | noncoding |
| MSTRG. 34429. 2  | -1. 90037  | noncoding |
| MSTRG. 34429. 1  | -1. 60915  | noncoding |
| MSTRG. 34438. 1  | -1. 69767  | noncoding |
| MSTRG. 34439. 1  | -1. 61429  | noncoding |
| MSTRG. 34449. 1  | -1. 52997  | noncoding |
| MSTRG. 34449. 2  | -1. 31728  | noncoding |
| MSTRG. 34449. 3  | -1. 55079  | noncoding |
| MSTRG. 34449. 4  | -1. 66642  | noncoding |
| MSTRG. 34449. 5  | -1. 28748  | noncoding |
| MSTRG. 34449. 6  | -1. 33872  | noncoding |
| MSTRG. 34449. 7  | -1. 29944  | noncoding |
| MSTRG. 34449. 9  | -1. 21788  | noncoding |
| MSTRG. 34449. 8  | -1. 22544  | noncoding |
| MSTRG. 34449. 10 | -0. 951299 | noncoding |
| MSTRG. 34446. 1  | -1. 69572  | noncoding |
| MSTRG. 34446. 2  | -2. 31255  | noncoding |
| MSTRG. 34452. 1  | -1. 9283   | noncoding |
| MSTRG. 34452. 2  | -2. 05139  | noncoding |
| MSTRG. 34458. 1  | -1. 85683  | noncoding |
| MSTRG. 34460. 1  | -1. 86144  | noncoding |
| MSTRG. 34455. 1  | -2. 28794  | noncoding |
| MSTRG. 34455. 2  | -2. 25415  | noncoding |
| MSTRG. 34467. 1  | -1. 86047  | noncoding |
| MSTRG. 34471. 1  | -2. 32451  | noncoding |
| MSTRG. 34478. 1  | 0. 688974  | coding    |
| MSTRG. 34482. 3  | -1. 03843  | noncoding |
| MSTRG. 34481. 1  | -1. 52537  | noncoding |
| MSTRG. 34486. 1  | -2. 38943  | noncoding |
| MSTRG. 34489. 1  | -1. 22802  | noncoding |
| MSTRG. 34501. 1  | -1. 32607  | noncoding |
| MSTRG. 34505. 1  | 0. 954322  | coding    |
| MSTRG. 34511. 1  | -1. 05566  | noncoding |

|                 |           |           |
|-----------------|-----------|-----------|
| MSTRG. 34511.2  | -1.98556  | noncoding |
| MSTRG. 34511.3  | -1.98556  | noncoding |
| MSTRG. 34511.4  | -2.5337   | noncoding |
| MSTRG. 34512.1  | -2.02604  | noncoding |
| MSTRG. 34513.1  | -1.45379  | noncoding |
| MSTRG. 34514.1  | -2.2611   | noncoding |
| MSTRG. 34515.1  | -2.32017  | noncoding |
| MSTRG. 34519.2  | -0.829928 | noncoding |
| MSTRG. 34519.1  | -0.641875 | noncoding |
| MSTRG. 34519.3  | -1.07351  | noncoding |
| MSTRG. 34519.4  | -1.07351  | noncoding |
| MSTRG. 34519.5  | -0.086529 | noncoding |
| MSTRG. 34519.6  | -0.089338 | noncoding |
| MSTRG. 34520.1  | -1.85861  | noncoding |
| MSTRG. 34521.1  | -2.41257  | noncoding |
| MSTRG. 34519.7  | -1.07351  | noncoding |
| MSTRG. 34524.1  | -1.36208  | noncoding |
| MSTRG. 34524.2  | -1.27985  | noncoding |
| MSTRG. 34524.3  | -0.990145 | noncoding |
| MSTRG. 34524.4  | -0.85284  | noncoding |
| MSTRG. 34524.5  | -0.820084 | noncoding |
| MSTRG. 34528.2  | -2.28199  | noncoding |
| MSTRG. 34528.1  | -1.69195  | noncoding |
| MSTRG. 34529.1  | -1.46988  | noncoding |
| MSTRG. 34537.1  | -0.662307 | noncoding |
| MSTRG. 34537.3  | -1.25464  | noncoding |
| MSTRG. 34537.2  | -2.02057  | noncoding |
| MSTRG. 34537.4  | -1.14928  | noncoding |
| MSTRG. 34532.1  | -2.28708  | noncoding |
| MSTRG. 34554.1  | 0.762487  | coding    |
| MSTRG. 34556.1  | -0.512032 | noncoding |
| MSTRG. 34554.2  | -0.231412 | noncoding |
| MSTRG. 34557.2  | 0.22927   | coding    |
| MSTRG. 34557.1  | 1.04124   | coding    |
| MSTRG. 34557.4  | 1.82819   | coding    |
| MSTRG. 34550.1  | -2.32005  | noncoding |
| MSTRG. 34550.2  | -2.26728  | noncoding |
| MSTRG. 34561.1  | -2.32546  | noncoding |
| MSTRG. 34561.2  | -2.32604  | noncoding |
| MSTRG. 34563.1  | -1.06676  | noncoding |
| MSTRG. 34621.2  | -0.344117 | noncoding |
| MSTRG. 34621.1  | -0.040482 | noncoding |
| MSTRG. 34621.3  | 0.524952  | coding    |
| MSTRG. 34621.4  | -1.42964  | noncoding |
| MSTRG. 34621.5  | -0.762179 | noncoding |
| MSTRG. 34622.1  | -0.018464 | noncoding |
| MSTRG. 34621.8  | -0.351284 | noncoding |
| MSTRG. 34621.6  | -0.29306  | noncoding |
| MSTRG. 34621.7  | -0.223946 | noncoding |
| MSTRG. 34621.11 | -0.203612 | noncoding |
| MSTRG. 34621.12 | -0.106698 | noncoding |
| MSTRG. 34621.10 | -0.035922 | noncoding |
| MSTRG. 34621.9  | -0.34898  | noncoding |
| MSTRG. 34621.13 | 0.653253  | coding    |

|                  |           |           |
|------------------|-----------|-----------|
| MSTRG. 34621. 14 | -0.465393 | noncoding |
| MSTRG. 34621. 15 | -1.39938  | noncoding |
| MSTRG. 34621. 17 | -1.21631  | noncoding |
| MSTRG. 34621. 16 | -1.80296  | noncoding |
| MSTRG. 34621. 18 | -1.30813  | noncoding |
| MSTRG. 34622. 3  | -0.173799 | noncoding |
| MSTRG. 34622. 4  | -0.275883 | noncoding |
| MSTRG. 34622. 5  | -0.279371 | noncoding |
| MSTRG. 34622. 6  | -0.173421 | noncoding |
| MSTRG. 34622. 7  | 0.031905  | coding    |
| MSTRG. 34622. 8  | -0.434745 | noncoding |
| MSTRG. 34622. 10 | -0.189298 | noncoding |
| MSTRG. 34622. 9  | -0.113406 | noncoding |
| MSTRG. 34622. 11 | -0.39677  | noncoding |
| MSTRG. 34622. 12 | -0.217972 | noncoding |
| MSTRG. 34622. 13 | -0.21571  | noncoding |
| MSTRG. 34622. 14 | -0.262081 | noncoding |
| MSTRG. 34622. 15 | -0.395741 | noncoding |
| MSTRG. 34622. 16 | -0.216785 | noncoding |
| MSTRG. 34568. 1  | -1.3159   | noncoding |
| MSTRG. 34568. 2  | -1.45687  | noncoding |
| MSTRG. 34569. 1  | -1.9755   | noncoding |
| MSTRG. 34570. 1  | -2.12176  | noncoding |
| MSTRG. 34572. 1  | -1.24441  | noncoding |
| MSTRG. 34574. 1  | -2.26304  | noncoding |
| MSTRG. 34575. 1  | -2.29427  | noncoding |
| MSTRG. 34576. 1  | -2.34598  | noncoding |
| MSTRG. 34579. 2  | 0.557506  | coding    |
| MSTRG. 34580. 1  | -1.58932  | noncoding |
| MSTRG. 34583. 1  | -0.918623 | noncoding |
| MSTRG. 34583. 2  | 0.031072  | coding    |
| MSTRG. 34587. 1  | -2.32628  | noncoding |
| MSTRG. 34592. 2  | -1.68468  | noncoding |
| MSTRG. 34592. 1  | -1.76784  | noncoding |
| MSTRG. 34592. 3  | -1.78157  | noncoding |
| MSTRG. 34592. 4  | -1.68896  | noncoding |
| MSTRG. 34592. 5  | -1.81575  | noncoding |
| MSTRG. 34595. 7  | -0.783807 | noncoding |
| MSTRG. 34595. 3  | -0.643413 | noncoding |
| MSTRG. 34595. 5  | -0.643413 | noncoding |
| MSTRG. 34595. 6  | -0.643413 | noncoding |
| MSTRG. 34595. 8  | -1.49277  | noncoding |
| MSTRG. 34595. 2  | -0.769402 | noncoding |
| MSTRG. 34595. 4  | -1.02103  | noncoding |
| MSTRG. 34595. 9  | -0.657905 | noncoding |
| MSTRG. 34595. 10 | -1.54982  | noncoding |
| MSTRG. 34595. 11 | -1.54955  | noncoding |
| MSTRG. 34595. 12 | -1.02103  | noncoding |
| MSTRG. 34595. 13 | -0.786981 | noncoding |
| MSTRG. 34595. 14 | -1.59022  | noncoding |
| MSTRG. 34595. 15 | -1.50042  | noncoding |
| MSTRG. 34595. 16 | -1.58313  | noncoding |
| MSTRG. 34600. 1  | -1.57029  | noncoding |
| MSTRG. 34601. 2  | -1.68924  | noncoding |



|                 |           |           |
|-----------------|-----------|-----------|
| MSTRG. 34601.3  | -1.7779   | noncoding |
| MSTRG. 34601.1  | -1.78113  | noncoding |
| MSTRG. 34603.1  | -2.90558  | noncoding |
| MSTRG. 34600.2  | -0.977615 | noncoding |
| MSTRG. 34600.3  | -1.38687  | noncoding |
| MSTRG. 34606.1  | -1.66152  | noncoding |
| MSTRG. 34600.5  | -1.36826  | noncoding |
| MSTRG. 34600.4  | -1.21886  | noncoding |
| MSTRG. 34600.6  | -1.66926  | noncoding |
| MSTRG. 34597.1  | -2.06376  | noncoding |
| MSTRG. 34612.1  | -0.768245 | noncoding |
| MSTRG. 34613.1  | -1.88194  | noncoding |
| MSTRG. 34611.1  | -2.1675   | noncoding |
| MSTRG. 34616.1  | -1.89968  | noncoding |
| MSTRG. 34616.2  | -1.89968  | noncoding |
| MSTRG. 34616.3  | -2.0295   | noncoding |
| MSTRG. 34616.4  | -1.84123  | noncoding |
| MSTRG. 34616.5  | -1.89968  | noncoding |
| MSTRG. 34615.1  | -2.24958  | noncoding |
| MSTRG. 34619.1  | -0.484891 | noncoding |
| MSTRG. 34631.3  | -0.126281 | noncoding |
| MSTRG. 34631.2  | -0.565843 | noncoding |
| MSTRG. 34632.1  | -2.11503  | noncoding |
| MSTRG. 34633.1  | -1.66703  | noncoding |
| MSTRG. 34632.2  | -2.34178  | noncoding |
| MSTRG. 34638.2  | 0.250602  | coding    |
| MSTRG. 34638.1  | -0.842745 | noncoding |
| MSTRG. 34637.2  | 0.722654  | coding    |
| MSTRG. 34637.4  | 0.796825  | coding    |
| MSTRG. 34653.1  | 0.550756  | coding    |
| MSTRG. 34655.2  | 0.042547  | coding    |
| MSTRG. 34655.1  | -0.120482 | noncoding |
| MSTRG. 34656.2  | -1.9581   | noncoding |
| MSTRG. 34656.1  | -1.63651  | noncoding |
| MSTRG. 34657.1  | -1.49155  | noncoding |
| MSTRG. 34660.1  | -2.07153  | noncoding |
| MSTRG. 34661.1  | -2.52984  | noncoding |
| MSTRG. 34653.2  | -1.00421  | noncoding |
| MSTRG. 34664.1  | -0.248465 | noncoding |
| MSTRG. 34666.1  | -2.13068  | noncoding |
| MSTRG. 34671.1  | 0.373296  | coding    |
| MSTRG. 34646.1  | -2.32087  | noncoding |
| MSTRG. 34647.3  | 0.313393  | coding    |
| MSTRG. 34647.1  | 0.644167  | coding    |
| MSTRG. 34675.3  | -1.2668   | noncoding |
| MSTRG. 34675.2  | -1.16896  | noncoding |
| MSTRG. 34675.4  | -1.32416  | noncoding |
| MSTRG. 34675.5  | -1.46942  | noncoding |
| MSTRG. 34681.2  | 0.068014  | coding    |
| MSTRG. 34681.4  | 0.594375  | coding    |
| MSTRG. 34681.3  | 1.07036   | coding    |
| MSTRG. 34682.7  | 0.26778   | coding    |
| MSTRG. 34682.9  | 0.189941  | coding    |
| MSTRG. 34682.11 | 0.780961  | coding    |

|                  |            |           |
|------------------|------------|-----------|
| MSTRG. 34682. 12 | 0. 780961  | coding    |
| MSTRG. 34683. 1  | -2. 09145  | noncoding |
| MSTRG. 34707. 1  | -2. 02195  | noncoding |
| MSTRG. 34708. 1  | -2. 194    | noncoding |
| MSTRG. 34712. 1  | -1. 50195  | noncoding |
| MSTRG. 34714. 1  | -1. 23157  | noncoding |
| MSTRG. 34715. 1  | 0. 927313  | coding    |
| MSTRG. 34716. 1  | -2. 45909  | noncoding |
| MSTRG. 34717. 1  | -0. 615288 | noncoding |
| MSTRG. 34715. 2  | 0. 96829   | coding    |
| MSTRG. 34715. 3  | 1. 05206   | coding    |
| MSTRG. 34718. 1  | -1. 20744  | noncoding |
| MSTRG. 34719. 1  | -2. 07845  | noncoding |
| MSTRG. 34720. 1  | -0. 595296 | noncoding |
| MSTRG. 34721. 1  | -0. 142477 | noncoding |
| MSTRG. 34722. 1  | -2. 43185  | noncoding |
| MSTRG. 34715. 4  | -0. 0074   | noncoding |
| MSTRG. 34723. 1  | -2. 1018   | noncoding |
| MSTRG. 34723. 2  | -1. 73374  | noncoding |
| MSTRG. 34724. 1  | 1. 06332   | coding    |
| MSTRG. 34725. 1  | -1. 26908  | noncoding |
| MSTRG. 34719. 2  | 0. 139781  | coding    |
| MSTRG. 34717. 2  | -1. 48874  | noncoding |
| MSTRG. 34717. 3  | -2. 07514  | noncoding |
| MSTRG. 34726. 1  | -0. 278763 | noncoding |
| MSTRG. 34715. 5  | 0. 080927  | coding    |
| MSTRG. 34727. 1  | -1. 26721  | noncoding |
| MSTRG. 34687. 1  | -2. 45756  | noncoding |
| MSTRG. 34689. 2  | -1. 41584  | noncoding |
| MSTRG. 34690. 2  | 2. 97007   | coding    |
| MSTRG. 34692. 1  | -2. 09672  | noncoding |
| MSTRG. 34701. 1  | -1. 41689  | noncoding |
| MSTRG. 34702. 1  | -0. 794424 | noncoding |
| MSTRG. 34729. 1  | -1. 33868  | noncoding |
| MSTRG. 34743. 1  | 0. 904338  | coding    |
| MSTRG. 34743. 2  | 1. 51602   | coding    |
| MSTRG. 34744. 2  | 1. 75353   | coding    |
| MSTRG. 34744. 3  | 1. 50866   | coding    |
| MSTRG. 34744. 4  | 0. 807825  | coding    |
| MSTRG. 34744. 5  | 1. 88462   | coding    |
| MSTRG. 34751. 1  | 0. 501527  | coding    |
| MSTRG. 34755. 2  | -0. 267004 | noncoding |
| MSTRG. 34755. 1  | 0. 275922  | coding    |
| MSTRG. 34761. 2  | 0. 347559  | coding    |
| MSTRG. 34763. 2  | 1. 89032   | coding    |
| MSTRG. 34764. 1  | -0. 700346 | noncoding |
| MSTRG. 34771. 9  | -0. 851235 | noncoding |
| MSTRG. 34771. 13 | -0. 778321 | noncoding |
| MSTRG. 34778. 1  | -0. 959934 | noncoding |
| MSTRG. 34778. 3  | -1. 44088  | noncoding |
| MSTRG. 34778. 4  | -1. 44088  | noncoding |
| MSTRG. 34778. 5  | -0. 990423 | noncoding |
| MSTRG. 34778. 6  | -0. 990423 | noncoding |
