# Supplementary material for: Identification of Novel lncRNA and Differentially Expressed Genes (DEGs) of Testicular Tissues among Cattle, Yak, and Cattle-Yak Associated with Male Infertility
Source: MDPI journal article supplement (doi:10.3390/ani11082420), 2021-08-17
Supplement: s1 [file s1]

Table S8 The significantly enriched GO description of BP, CC and MF

for the upregulated mRNA target genes of yak

| Ontology | Term                                           | GO.ID      | Significant | Annotated | Qvalue |
|----------|------------------------------------------------|------------|-------------|-----------|--------|
| BP       | positive regulation of biological process      | GO:0048518 | 15          | 4757      | 1      |
| BP       | cellular component organization or biogenesis  | GO:0071840 | 16          | 5228      | 1      |
| BP       | metabolic process                              | GO:0008152 | 27          | 9982      | 1      |
| BP       | localization                                   | GO:0051179 | 14          | 5065      | 1      |
| BP       | cellular process                               | GO:0009987 | 37          | 14842     | 1      |
| BP       | regulation of biological process               | GO:0050789 | 26          | 10466     | 1      |
| BP       | biological regulation                          | GO:0065007 | 27          | 11042     | 1      |
| BP       | multicellular organismal process               | GO:0032501 | 14          | 6664      | 1      |
| BP       | response to stimulus                           | GO:0050896 | 18          | 8387      | 1      |
| BP       | signaling                                      | GO:0023052 | 12          | 6065      | 1      |
| CC       | organelle                                      | GO:0043226 | 36          | 12576     | 1      |
| CC       | organelle part                                 | GO:0044422 | 25          | 7853      | 1      |
| CC       | supramolecular fiber                           | GO:0099512 | 5           | 841       | 1      |
| CC       | membrane-enclosed lumen                        | GO:0031974 | 13          | 3755      | 1      |
| CC       | cell part                                      | GO:0044464 | 42          | 16747     | 1      |
| CC       | protein-containing complex                     | GO:0032991 | 14          | 4316      | 1      |
| CC       | cell                                           | GO:0005623 | 42          | 16775     | 1      |
| CC       | extracellular region                           | GO:0005576 | 7           | 4337      | 1      |
| CC       | membrane                                       | GO:0016020 | 18          | 9946      | 1      |
| CC       | membrane part                                  | GO:0044425 | 12          | 7766      | 1      |
| MF       | transcription factor activity, protein binding | GO:0000988 | 4           | 520       | 1      |
| MF       | binding                                        | GO:0005488 | 31          | 10991     | 1      |
| MF       | catalytic activity                             | GO:0003824 | 18          | 5764      | 1      |
| MF       | structural molecule activity                   | GO:0005198 | 3           | 706       | 1      |
| MF       | channel regulator activity                     | GO:0016247 | 1           | 117       | 1      |
| MF       | molecular function regulator                   | GO:0098772 | 5           | 1506      | 1      |
| MF       | enzyme regulator activity                      | GO:0030234 | 3           | 890       | 1      |
| MF       | transporter activity                           | GO:0005215 | 2           | 1273      | 1      |
| MF       | signal transducer activity                     | GO:0004871 | 1           | 2456      | 1      |
